# Supplementary material for: Effects of Prenatal Exposure to Titanium Dioxide Nanoparticles on DNA Methylation and Gene Expression Profile in the Mouse Brain
Source: PubMed Central journal article supplement (PMC8915839; doi:10.3389/ftox.2021.705910), 2021-10-08
Supplement: Table3.pdf [file Table3.pdf]

**Supplementary Table 3. Alteration of DNA methylation state of the brain of female offspring prenatally exposed to TiO<sub>2</sub>-NP.**

The relative DNA methylation was calculated by dividing Cy5 signal by Cy3 signal obtained from CpG island microarray and then compared between Sham and TiO<sub>2</sub>-NP groups.

| ProbeName      | Target position of probe on CpG island microarray | TargetID                 | GeneSymbol    | CpG island Description | Ratio of relative methylation (TiO <sub>2</sub> -NP/vehicle) | Sham group                     |                    |                    | TiO <sub>2</sub> -H group      |                    |                    |
|----------------|---------------------------------------------------|--------------------------|---------------|------------------------|--------------------------------------------------------------|--------------------------------|--------------------|--------------------|--------------------------------|--------------------|--------------------|
|                |                                                   |                          |               |                        |                                                              | Relative methylation (Cy5/Cy3) | Cy3 signal (Input) | Cy5 signal (MeDIP) | Relative methylation (Cy5/Cy3) | Cy3 signal (Input) | Cy5 signal (MeDIP) |
| A_68_P29455874 | chr14:22804989-22805033                           | NM_145459:3813           | Zfp503        | INSIDE                 | 6.806                                                        | 12.105                         | 640.93             | 7758.46            | 82.389                         | 599.62             | 49402.73           |
| A_68_P31350850 | chr17:74695143-74695187                           | NM_133771:-961           | Memo1         | PROMOTER               | 5.241                                                        | 2.878                          | 450.72             | 1297.15            | 15.083                         | 368.81             | 5562.66            |
| A_68_P26795688 | chr9:105033875-105033919                          | NM_029385:239            | Nudt16        | INSIDE                 | 4.477                                                        | 3.082                          | 440.46             | 1357.41            | 13.798                         | 418.55             | 5775.31            |
| A_68_P25228678 | chr7:80521046-80521090                            | NM_177740:663            | Rgma          | INSIDE                 | 4.245                                                        | 0.556                          | 663.33             | 368.98             | 2.361                          | 644.67             | 1522.29            |
| A_68_P23644448 | chr5:43626040-43626084                            | NR_028417:531            | Gm7854        | INSIDE                 | 4.107                                                        | 0.491                          | 627.14             | 307.93             | 2.017                          | 723.63             | 1459.38            |
| A_68_P25574929 | chr7:146132486-146132530                          | NM_028708:76             | Jakmp3        | INSIDE                 | 4.012                                                        | 0.451                          | 881.02             | 397.57             | 1.810                          | 713.30             | 1291.35            |
| A_68_P33007146 | chr9_random:49897-49941                           | NR_015516:-3490          | 4930526115Rik | PROMOTER               | 3.692                                                        | 6.288                          | 3418.87            | 21499.06           | 23.215                         | 2298.35            | 53355.95           |
| A_68_P20231213 | chr1:53353942-53353986                            | NM_145517:26             | Ormdl1        | INSIDE                 | 3.543                                                        | 1.826                          | 419.01             | 764.99             | 6.468                          | 388.28             | 2511.27            |
| A_68_P32533200 | chrX:90534061-90534105                            | NM_007492:2098           | Arx           | INSIDE                 | 3.504                                                        | 13.814                         | 6300.76            | 87041.16           | 48.399                         | 3229.51            | 156305.70          |
| A_68_P26171007 | chr8:114465131-114465175                          | NM_026693:535            | Gabarapl2     | INSIDE                 | 3.497                                                        | 27.141                         | 3597.79            | 97649.33           | 94.902                         | 1892.10            | 179564.50          |
| A_68_P26164572 | chr8:113262808-113262852                          | NM_198625:17447          | Mtss1         | INSIDE                 | 3.486                                                        | 7.191                          | 2535.96            | 18235.83           | 25.068                         | 1841.30            | 46157.41           |
| A_68_P24513815 | chr6:65728982-65729026                            | NM_027547:49             | Prdm5         | INSIDE                 | 3.419                                                        | 8.570                          | 852.11             | 7302.43            | 29.302                         | 723.73             | 21206.73           |
| A_68_P26164573 | chr8:113262875-113262919                          | NM_198625:17513          | Mtss1         | INSIDE                 | 3.405                                                        | 4.778                          | 3372.57            | 16114.77           | 16.269                         | 2472.91            | 40232.99           |
| A_68_P25724843 | chr8:26127513-26127557                            | NM_007404:-140           | Adam9         | DIVERGENT_PROMOTER     | 3.403                                                        | 7.316                          | 1524.90            | 11155.47           | 24.892                         | 1145.63            | 28517.06           |
| A_68_P25845477 | chr8:49195740-49195784                            | NM_001161515:396         | Dctd1         | INSIDE                 | 3.295                                                        | 10.942                         | 2629.12            | 28768.68           | 36.052                         | 1918.64            | 69170.72           |
| A_68_P21084949 | chr2:27330700-27330744                            | NM_023336:196            | Brd3          | INSIDE                 | 3.270                                                        | 18.917                         | 430.60             | 8145.76            | 61.868                         | 299.91             | 18554.51           |
| A_68_P27693341 | chr11:33101001-33101045                           | NM_019916:2566           | Tlx3          | INSIDE                 | 3.266                                                        | 11.424                         | 11521.46           | 131618.90          | 37.311                         | 7480.28            | 279095.00          |
| A_68_P26812299 | chr9:107888278-107888322                          | NM_026597:-53            | 6230427J02Rik | PROMOTER               | 3.211                                                        | 41.034                         | 2065.67            | 84762.66           | 131.746                        | 820.78             | 108134.90          |
| A_68_P31167789 | chr17:37334385-37334429                           | NM_001011518:505         | Olfir94       | INSIDE                 | 3.185                                                        | 0.553                          | 612.40             | 338.39             | 1.760                          | 485.62             | 854.62             |
| A_68_P29619050 | chr14:56262458-56262502                           | NM_028780:163            | Tm9sf1        | INSIDE                 | 3.144                                                        | 21.737                         | 4434.65            | 96395.99           | 68.347                         | 2167.49            | 148140.80          |
| A_68_P24638868 | chr6:91361534-91361578                            | NM_009527:-193           | Wnt7a         | PROMOTER               | 3.112                                                        | 4.262                          | 1684.23            | 7177.50            | 13.263                         | 1343.70            | 17822.06           |
| A_68_P23203724 | chr4:109649844-109649888                          | NM_172296:-763           | Dmrta2        | PROMOTER               | 3.082                                                        | 29.984                         | 17420.38           | 522325.10          | 92.404                         | 8951.32            | 827137.40          |
| A_68_P27980117 | chr11:84693941-84693985                           | NM_001077636:-175        | Pigw          | PROMOTER               | 3.046                                                        | 8.934                          | 7846.91            | 70105.60           | 27.217                         | 4810.06            | 130915.60          |
| A_68_P27928203 | chr11:75608556-75608600                           | NM_007873:981            | Doc2b         | INSIDE                 | 3.043                                                        | 7.601                          | 425.29             | 3232.70            | 23.131                         | 319.99             | 7401.59            |
| A_68_P29060390 | chr13:56397734-56397778                           | NM_019568:156            | Cxcl14        | INSIDE                 | 3.036                                                        | 3.480                          | 3675.66            | 12793.06           | 10.568                         | 2602.92            | 27507.92           |
| A_68_P28222996 | chr12:8506600-8506644                             | NM_007483:169            | Rhob          | INSIDE                 | 3.027                                                        | 29.504                         | 8519.70            | 251363.70          | 89.305                         | 4297.86            | 383821.30          |
| A_68_P32778409 | chrX:156576281-156576325                          | NM_008810:-34            | Pdha1         | PROMOTER               | 3.016                                                        | 7.865                          | 716.04             | 5631.76            | 23.720                         | 359.32             | 8523.27            |
| A_68_P31155038 | chr17:34784397-34784441                           | NM_017406:294            | Atf6b         | INSIDE                 | 2.986                                                        | 23.608                         | 887.30             | 20947.48           | 70.495                         | 609.26             | 42949.85           |
| A_68_P32536642 | chrX:91168388-91168432                            | ENSMUST00000117999:-1109 |               | DIVERGENT_PROMOTER     | 2.977                                                        | 7.201                          | 1376.55            | 9912.26            | 21.433                         | 728.70             | 15618.38           |
| A_68_P29450509 | chr14:21871923-21871967                           | NM_134079:90             | Adk           | INSIDE                 | 2.951                                                        | 1.754                          | 1736.13            | 3045.36            | 5.176                          | 1477.41            | 7646.82            |
| A_68_P30374043 | chr15:80542551-80542595                           | NM_144812:830            | Tnrc6b        | INSIDE                 | 2.901                                                        | 10.575                         | 3462.10            | 36612.34           | 30.679                         | 2420.22            | 74249.83           |
| A_68_P32464342 | chrX:70961468-70961512                            | NM_012060:24             | Bcap31        | INSIDE                 | 2.898                                                        | 3.555                          | 4575.87            | 16269.43           | 10.304                         | 2149.12            | 22144.39           |
| A_68_P30137691 | chr15:36213148-36213192                           | NM_013923:-268           | Rnf19a        | PROMOTER               | 2.895                                                        | 7.973                          | 1368.64            | 10911.67           | 23.081                         | 795.84             | 18368.76           |
| A_68_P25703829 | chr8:19535136-19535180                            | ENSMUST00000118143:-745  |               | PROMOTER               | 2.887                                                        | 8.233                          | 5523.50            | 45473.70           | 23.771                         | 3532.43            | 83970.59           |
| A_68_P24568080 | chr6:77929479-77929523                            | NM_001109764:161         | Ctnna2        | INSIDE                 | 2.885                                                        | 5.838                          | 2978.31            | 17387.62           | 16.841                         | 1751.66            | 29498.86           |
| A_68_P22028773 | chr3:30407847-30407891                            | NM_021442:541            | Mecom         | INSIDE                 | 2.882                                                        | 13.646                         | 2919.90            | 39844.77           | 39.327                         | 2080.76            | 81830.92           |
| A_68_P21888635 | chr2:177853739-177853783                          | NM_001177789:81          | Phactr3       | INSIDE                 | 2.868                                                        | 23.028                         | 2515.99            | 62971.06           | 71.771                         | 1619.79            | 116252.80          |
| A_68_P32351252 | chrX:42143188-42143232                            | NM_001190718:128         | Deaf12l1      | INSIDE                 | 2.865                                                        | 7.296                          | 3767.38            | 27487.72           | 20.901                         | 2077.17            | 43415.76           |
| A_68_P25571662 | chr7:145589207-145589251                          | NM_183289:185            | Teerg1l       | INSIDE                 | 2.863                                                        | 9.562                          | 4573.94            | 43735.11           | 27.371                         | 2937.71            | 80409.07           |
| A_68_P28155403 | chr11:115664957-115665001                         | NM_080643:9928           | Caskin2       | INSIDE                 | 2.858                                                        | 7.044                          | 4618.06            | 32531.25           | 20.130                         | 3180.69            | 64028.48           |
| A_68_P28059604 | chr11:98821830-98821874                           | NM_001176528:68          | Rara          | INSIDE                 | 2.846                                                        | 9.755                          | 2977.11            | 29040.29           | 2211.13                        | 61381.64           |                    |
| A_68_P23324350 | chr4:134260533-134260577                          | NM_207237:-349           | Man1c1        | PROMOTER               | 2.820                                                        | 6.404                          | 6070.41            | 38876.71           | 18.062                         | 3941.66            | 71192.51           |
| A_68_P33007145 | chr9_random:49764-49808                           | NR_015516:-3622          | 4930526115Rik | PROMOTER               | 2.796                                                        | 13.504                         | 11845.74           | 159960.60          | 37.756                         | 6253.91            | 236121.30          |
| A_68_P28307263 | chr12:28027320-28027364                           | NM_009234:241            | Sox11         | INSIDE                 | 2.795                                                        | 16.492                         | 4774.96            | 78748.73           | 46.092                         | 3149.38            | 145159.90          |
| A_68_P25196205 | chr7:74994369-74994413                            |                          | Unknown       |                        | 2.771                                                        | 7.120                          | 6927.70            | 49326.62           | 19.730                         | 5073.07            | 100093.90          |
| A_68_P26344891 | chr9:20780545-20780589                            | NM_010333:671            | S1pr2         | INSIDE                 | 2.748                                                        | 1.576                          | 1964.61            | 3095.35            | 4.330                          | 1484.57            | 6427.85            |
| A_68_P22199719 | chr3:65196469-65196513                            | NM_026155:-15            | Ssr3          | PROMOTER               | 2.746                                                        | 17.796                         | 15091.40           | 268560.50          | 48.865                         | 7125.09            | 348164.30          |

| ProbeName      | Target position of probe on CpG island microarray | TargetID                  | GeneSymbol    | CpG island Description | Ratio of relative methylation (TiO <sub>2</sub> -NP/Vehicle) | Sham group                     |                    |                    | TiO <sub>2</sub> -H group      |                    |                    |
|----------------|---------------------------------------------------|---------------------------|---------------|------------------------|--------------------------------------------------------------|--------------------------------|--------------------|--------------------|--------------------------------|--------------------|--------------------|
|                |                                                   |                           |               |                        |                                                              | Relative methylation (Cy5/Cy3) | Cy3 signal (Input) | Cy5 signal (MeDIP) | Relative methylation (Cy5/Cy3) | Cy3 signal (Input) | Cy5 signal (MeDIP) |
| A_68_P27129526 | chr10:50312500-50312544                           | NM_001146089:48           | Ascc3         | INSIDE                 | 2.737                                                        | 7.551                          | 1717.70            | 12970.13           | 20.665                         | 1310.39            | 27079.84           |
| A_68_P22531299 | chr3:130975017-130975061                          | NM_008212:-83             | Hadh          | PROMOTER               | 2.737                                                        | 10.628                         | 15469.42           | 164409.20          | 29.089                         | 9081.46            | 264171.40          |
| A_68_P23567791 | chr5:29805138-29805182                            | NM_019944:-150            | Mnx1          | PROMOTER               | 2.737                                                        | 4.281                          | 2107.37            | 9020.61            | 11.717                         | 1689.85            | 19799.24           |
| A_68_P20412166 | chr1:88338644-88338688                            | AK089549:7401             |               | DOWNSTREAM             | 2.737                                                        | 6.103                          | 1274.33            | 7777.15            | 16.703                         | 910.84             | 15214.20           |
| A_68_P21582988 | chr2:121632726-121632770                          | NM_172673:45              | Frmd5         | INSIDE                 | 2.734                                                        | 8.279                          | 6123.14            | 50694.51           | 22.637                         | 3823.30            | 86547.30           |
| A_68_P26167383 | chr8:113783057-113783101                          | NM_009149:24              | Glg1          | INSIDE                 | 2.733                                                        | 6.404                          | 3079.88            | 19722.76           | 17.500                         | 1937.32            | 33903.41           |
| A_68_P24686653 | chr6:99472198-99472242                            | ENSMUST00000155466:144571 |               | INSIDE                 | 2.730                                                        | 8.343                          | 2538.43            | 21179.35           | 22.775                         | 1588.22            | 36171.95           |
| A_68_P21969040 | chr3:17955766-17955810                            | NM_021560:1464            | Bhlhe22       | INSIDE                 | 2.727                                                        | 11.831                         | 7289.10            | 86236.40           | 32.261                         | 4657.85            | 150267.20          |
| A_68_P24973879 | chr7:13551564-13551609                            | NM_178732:374             | Zfp324        | INSIDE                 | 2.727                                                        | 10.119                         | 12804.14           | 129564.20          | 27.590                         | 6837.10            | 188638.10          |
| A_68_P20457532 | chr1:95700895-95700939                            | NM_025454:375             | Ing5          | INSIDE                 | 2.724                                                        | 6.716                          | 2820.91            | 18944.70           | 18.295                         | 1637.99            | 29967.65           |
| A_68_P20184680 | chr1:42755426-42755470                            | NM_008900:1458            | Pou3f3        | INSIDE                 | 2.714                                                        | 6.638                          | 5306.77            | 35227.30           | 18.016                         | 3602.30            | 64898.50           |
| A_68_P26878663 | chr9:120486371-120486416                          | NM_025974:5760            | Rpl14         | DOWNSTREAM             | 2.712                                                        | 1.510                          | 1244.63            | 1879.28            | 4.095                          | 974.70             | 3991.69            |
| A_68_P25992690 | chr8:81636588-81636632                            | NM_178267:84275           | Zfp827        | INSIDE                 | 2.710                                                        | 18.337                         | 18328.51           | 336097.60          | 49.688                         | 10239.56           | 508780.30          |
| A_68_P31472616 | chr18:6241499-6241543                             | NM_008448:2               | Kif5b         | INSIDE                 | 2.705                                                        | 13.405                         | 1618.85            | 21700.12           | 36.255                         | 1036.17            | 37566.28           |
| A_68_P26466435 | chr9:44041858-44041902                            | NM_007619:249             | Cbl           | INSIDE                 | 2.703                                                        | 8.729                          | 4609.01            | 40229.81           | 23.595                         | 3069.96            | 72435.80           |
| A_68_P20644107 | chr1:138036961-138037006                          | NM_001039472:9006         | Kif21b        | INSIDE                 | 2.698                                                        | 10.540                         | 4945.35            | 52121.62           | 28.439                         | 3189.20            | 90698.85           |
| A_68_P24092948 | chr5:130731326-130731370                          | NM_023248:-16             | Sbds          | DIVERGENT_PROMOTER     | 2.697                                                        | 2.449                          | 2368.30            | 5800.12            | 6.606                          | 1776.61            | 11735.43           |
| A_68_P20094994 | chr1:24685459-24685503                            | NM_026719:98              | Lmbrd1        | INSIDE                 | 2.688                                                        | 20.375                         | 4317.54            | 87970.49           | 54.775                         | 2990.87            | 163823.90          |
| A_68_P31126969 | chr17:29401134-29401178                           | NM_026845:-240            | Ppil1         | DIVERGENT_PROMOTER     | 2.682                                                        | 11.142                         | 1321.08            | 14720.04           | 29.885                         | 882.61             | 26376.44           |
| A_68_P29329250 | chr13:112279384-112279428                         | NM_001122963:843          | Gpbb1         | INSIDE                 | 2.680                                                        | 12.969                         | 18361.71           | 238134.20          | 34.760                         | 9847.22            | 342287.80          |
| A_68_P32365466 | chrX:45947510-45947554                            | NM_153532:-2222           | Zfp280c       | PROMOTER               | 2.676                                                        | 5.021                          | 1811.17            | 9094.51            | 13.439                         | 945.31             | 12704.10           |
| A_68_P32099204 | chr19:38129403-38129447                           | NM_028293:-90             | Cep55         | PROMOTER               | 2.661                                                        | 14.261                         | 12747.94           | 181792.80          | 37.952                         | 7793.33            | 295773.50          |
| A_68_P21426271 | chr2:91895625-91895669                            | ENSMUST00000123840:3880   |               | INSIDE                 | 2.658                                                        | 8.286                          | 5247.23            | 43479.63           | 22.024                         | 3647.86            | 80341.66           |
| A_68_P22278904 | chr3:82162070-82162114                            | NM_001081230:99           | Mtap9         | INSIDE                 | 2.656                                                        | 15.147                         | 1784.01            | 27022.45           | 40.232                         | 980.84             | 39461.13           |
| A_68_P26529572 | chr9:54997117-54997161                            | NM_180600:-37             | Ube2q2        | PROMOTER               | 2.656                                                        | 11.264                         | 2664.79            | 30016.69           | 29.913                         | 1875.82            | 56110.90           |
| A_68_P20417972 | chr1:89371861-89371906                            | NM_028473:5045            | 3110079015Rik | INSIDE                 | 2.652                                                        | 18.741                         | 968.94             | 18158.52           | 49.706                         | 756.70             | 37611.98           |
| A_68_P25032017 | chr7:31319995-31320040                            | NM_178252:11              | Arhgap33      | INSIDE                 | 2.650                                                        | 5.817                          | 30484.87           | 177343.10          | 15.418                         | 21467.82           | 330995.40          |
| A_68_P32396713 | chrX:53862851-53862895                            | NM_172780:-139            | Sle9a6        | PROMOTER               | 2.649                                                        | 5.416                          | 1489.93            | 8069.17            | 14.349                         | 796.83             | 11433.70           |
| A_68_P31322348 | A_68_P31322348                                    |                           |               | Unknown                | 2.647                                                        | 7.240                          | 1352.79            | 9794.43            | 19.167                         | 1045.04            | 20030.55           |
| A_68_P24922453 | chr6:145289480-145289524                          |                           |               | Unknown                | 2.645                                                        | 0.564                          | 817.78             | 461.17             | 1.492                          | 706.91             | 1054.43            |
| A_68_P20412593 | chr1:88422665-88422709                            | NM_008972:-624            | Ptma          | PROMOTER               | 2.644                                                        | 5.930                          | 4838.46            | 28693.15           | 15.677                         | 3042.74            | 47701.42           |
| A_68_P27476522 | chr10:116018238-116018282                         | NM_001037846:307          | Cnot2         | INSIDE                 | 2.636                                                        | 8.518                          | 13218.99           | 112595.80          | 22.456                         | 8717.08            | 195749.60          |
| A_68_P25516578 | chr7:136735619-136735663                          | NM_172255:264             | Wdr11         | INSIDE                 | 2.632                                                        | 0.212                          | 1316.65            | 279.76             | 0.559                          | 1149.78            | 642.91             |
| A_68_P28103521 | chr11:106649919-106649963                         | NM_007840:-132            | Ddx5          | DIVERGENT_PROMOTER     | 2.625                                                        | 6.666                          | 17960.68           | 119723.90          | 17.499                         | 11517.85           | 201546.70          |
| A_68_P21490977 | chr2:104656727-104656771                          | NM_001123327:105          | Qser1         | INSIDE                 | 2.622                                                        | 8.015                          | 3488.35            | 27959.02           | 21.018                         | 2688.77            | 56512.11           |
| A_68_P29856568 | chr14:102128930-102128974                         | NM_201529:-192            | Lmo7          | PROMOTER               | 2.621                                                        | 10.226                         | 4507.02            | 46087.56           | 26.806                         | 2966.50            | 79519.01           |
| A_68_P32796350 | chrX:160514136-160514180                          | NM_009173:-177            | Siah1b        | PROMOTER               | 2.621                                                        | 3.643                          | 1852.28            | 6747.79            | 9.547                          | 1061.03            | 10129.19           |
| A_68_P28099478 | chr11:105946211-105946255                         | NM_011947:17              | Map3k3        | INSIDE                 | 2.617                                                        | 6.441                          | 23400.69           | 150731.30          | 16.857                         | 15983.49           | 269440.70          |
| A_68_P23146552 | chr4:99602526-99602570                            | NM_028132:493             | Pgm2          | INSIDE                 | 2.610                                                        | 5.642                          | 12527.75           | 70679.57           | 14.726                         | 8253.81            | 121548.50          |
| A_68_P21076600 | chr2:25996203-25996247                            | ENSMUST00000133808:-183   |               | PROMOTER               | 2.610                                                        | 5.557                          | 1035.44            | 5754.15            | 14.505                         | 736.72             | 10685.75           |
| A_68_P28041915 | chr11:95866931-95866976                           | NM_009951:305             | Igf2bp1       | INSIDE                 | 2.608                                                        | 8.882                          | 6026.23            | 53526.77           | 23.168                         | 4126.34            | 95599.91           |
| A_68_P31144961 | chr17:32458430-32458474                           | NM_017476:29070           | Akap81        | INSIDE                 | 2.604                                                        | 5.486                          | 2734.95            | 15003.88           | 14.287                         | 1952.87            | 27900.76           |
| A_68_P26845381 | chr9:114473232-114473276                          | NM_001042503:233          | Trim71        | INSIDE                 | 2.604                                                        | 6.462                          | 664.84             | 4295.91            | 16.825                         | 520.90             | 8764.06            |
| A_68_P23297033 | chr4:129190774-129190818                          | NM_010807:-28             | Marcks11      | PROMOTER               | 2.602                                                        | 5.773                          | 10432.74           | 60230.91           | 15.025                         | 7036.61            | 105722.20          |
| A_68_P28771927 | chr12:118392576-118392621                         | NR_033538:-2856           | Gm10421       | PROMOTER               | 2.599                                                        | 4.131                          | 733.51             | 3030.00            | 10.736                         | 537.89             | 5774.98            |
| A_68_P23763011 | chr5:67009509-67009553                            | NM_009686:380             | Apbh2         | INSIDE                 | 2.598                                                        | 8.757                          | 907.55             | 7947.11            | 22.748                         | 649.96             | 14785.56           |
| A_68_P26342514 | chr9:20264309-20264353                            | NM_011753:274             | Zfp26         | INSIDE                 | 2.597                                                        | 5.833                          | 12946.13           | 75517.71           | 15.147                         | 9104.24            | 137900.20          |
| A_68_P28053223 | chr11:97744951-97744995                           | NM_001081435:496          | Fbxo47        | INSIDE                 | 2.589                                                        | 10.903                         | 9736.38            | 106154.20          | 28.224                         | 4882.70            | 137808.30          |
| A_68_P30590967 | chr16:21205377-21205421                           | NM_010143:531             | Ephb3         | INSIDE                 | 2.587                                                        | 10.916                         | 1196.74            | 13063.33           | 28.244                         | 837.42             | 23652.29           |
| A_68_P20240462 | chr1:55188131-55188175                            | NM_025283:64              | Mobk3         | INSIDE                 | 2.583                                                        | 1.455                          | 1093.20            | 1591.01            | 3.759                          | 1044.28            | 3925.12            |
| A_68_P27594327 | chr11:11937393-11937437                           | NM_001177629-9440         | Grb10         | PROMOTER               | 2.580                                                        | 7.830                          | 15526.51           | 121565.50          | 20.197                         | 11291.17           | 228048.70          |

| ProbeName      | Target position of probe on CpG island microarray | TargetID               | GeneSymbol    | CpG island Description | Ratio of relative methylation (TiO <sub>2</sub> -NP/Vehicle) | Sham group                     |                    |                    | TiO <sub>2</sub> -H group      |                    |                    |
|----------------|---------------------------------------------------|------------------------|---------------|------------------------|--------------------------------------------------------------|--------------------------------|--------------------|--------------------|--------------------------------|--------------------|--------------------|
|                |                                                   |                        |               |                        |                                                              | Relative methylation (Cy5/Cy3) | Cy3 signal (Input) | Cy5 signal (MeDIP) | Relative methylation (Cy5/Cy3) | Cy3 signal (Input) | Cy5 signal (MeDIP) |
| A_68_P26864195 | chr9:117949694-117949738                          | NM_001048146:100       | Azi2          | INSIDE                 | 2.577                                                        | 9.490                          | 2913.48            | 27648.78           | 24.453                         | 2021.37            | 49428.26           |
| A_68_P31458875 | chr18:3507840-3507884                             | NM_026505:-92          | Bambi         | PROMOTER               | 2.575                                                        | 17.069                         | 2820.94            | 48149.43           | 43.952                         | 1883.09            | 82765.38           |
| A_68_P20432927 | chr1:91819381-91819425                            | NM_010262:8349         | Gbx2          | DOWNSTREAM             | 2.570                                                        | 8.925                          | 4387.88            | 39160.32           | 22.935                         | 2276.94            | 52221.25           |
| A_68_P20170470 | chr1:40323556-40323600                            | NM_001123382:148       | Il1r1         | INSIDE                 | 2.563                                                        | 9.463                          | 1749.87            | 16559.53           | 24.254                         | 1125.93            | 27308.32           |
| A_68_P27840810 | chr11:59919914-59919958                           | NM_009021:1422         | Rai1          | INSIDE                 | 2.563                                                        | 8.736                          | 3024.48            | 26422.84           | 22.390                         | 2287.83            | 51223.82           |
| A_68_P31866219 | chr18:80894683-80894727                           | NM_001164111:10208     | Nfatc1        | INSIDE                 | 2.561                                                        | 3.778                          | 1960.18            | 7405.43            | 9.674                          | 1497.88            | 14490.19           |
| A_68_P24423934 | chr6:47544675-47544719                            | NM_001146689:333       | Ezh2          | INSIDE                 | 2.559                                                        | 4.342                          | 3868.12            | 16795.29           | 11.113                         | 2711.43            | 30131.82           |
| A_68_P21556049 | chr2:116946411-116946455                          | NM_033524:-753         | Spred1        | PROMOTER               | 2.559                                                        | 7.004                          | 7406.18            | 51873.25           | 17.920                         | 5638.84            | 101048.30          |
| A_68_P21836350 | chr2:167423298-167423342                          | NM_023230:34185        | Ube2v1        | DOWNSTREAM             | 2.559                                                        | 1.736                          | 6057.44            | 10517.36           | 4.443                          | 3948.40            | 17542.62           |
| A_68_P32453217 | chrX:68617827-68617871                            | NM_016985:-86          | Mtmr1         | PROMOTER               | 2.555                                                        | 3.098                          | 2572.42            | 7970.05            | 7.916                          | 1433.82            | 11349.50           |
| A_68_P33007166 | A_68_P33007166                                    |                        |               | Unknown                | 2.552                                                        | 11.771                         | 2314.31            | 27242.83           | 30.035                         | 1471.56            | 44198.88           |
| A_68_P24764862 | chr6:114232614-114232658                          | NM_178703:8            | Slefa1        | INSIDE                 | 2.549                                                        | 17.190                         | 6602.31            | 113494.20          | 43.825                         | 3404.89            | 149218.90          |
| A_68_P24052414 | chr5:123270992-123271036                          | NM_001042491:334       | Anapc5        | INSIDE                 | 2.546                                                        | 24.473                         | 4557.84            | 111543.90          | 62.308                         | 2482.58            | 154683.20          |
| A_68_P30567429 | chr16:15887235-15887279                           | NM_007679:-122         | Cebpd         | PROMOTER               | 2.546                                                        | 13.072                         | 7367.64            | 96311.68           | 33.284                         | 5181.40            | 172455.10          |
| A_68_P25736450 | chr8:28196606-28196651                            | NM_054044:316          | Gpr124        | INSIDE                 | 2.545                                                        | 10.594                         | 3452.96            | 36580.26           | 26.957                         | 2485.27            | 66994.82           |
| A_68_P27358653 | chr10:93774633-93774677                           | ENSMUST00000147869:-39 |               | PROMOTER               | 2.542                                                        | 4.982                          | 10801.78           | 51819.71           | 12.664                         | 7829.95            | 99155.27           |
| A_68_P32576281 | chrX:101395430-101395474                          | NM_001077354:1004      | C77370        | INSIDE                 | 2.536                                                        | 5.175                          | 658.04             | 3405.35            | 13.124                         | 385.33             | 5057.16            |
| A_68_P25094516 | chr7:52949587-52949631                            | NM_001033356:9825      | Ntn5          | INSIDE                 | 2.535                                                        | 6.663                          | 3395.28            | 22623.71           | 16.894                         | 2411.55            | 40740.20           |
| A_68_P23272336 | chr4:124804630-124804674                          | NM_153159:473          | Zc3h12a       | INSIDE                 | 2.534                                                        | 8.868                          | 9988.09            | 88569.59           | 22.468                         | 6409.08            | 143996.90          |
| A_68_P22973925 | chr4:63678841-63678885                            | NM_011607:29187        | Tnc           | INSIDE                 | 2.532                                                        | 7.689                          | 1740.85            | 13385.58           | 19.465                         | 1214.65            | 23643.61           |
| A_68_P20416757 | chr1:89160862-89160906                            | NM_028889:-54          | Efh1          | PROMOTER               | 2.531                                                        | 6.089                          | 109823.20          | 668703.40          | 15.413                         | 67870.99           | 1046093.00         |
| A_68_P31151615 | chr17:34168722-34168766                           | NM_001205214:-12       | Rxbp1         | DIVERGENT_PROMOTER     | 2.525                                                        | 2.326                          | 584.39             | 1359.19            | 5.873                          | 474.20             | 2785.18            |
| A_68_P32717145 | chrX:140752482-140752526                          | NM_026247:-4           | Alg13         | PROMOTER               | 2.523                                                        | 6.564                          | 4083.98            | 26807.27           | 16.561                         | 2514.84            | 41647.48           |
| A_68_P32684276 | chrX:133653076-133653120                          | NM_007957:1767         | Esx1          | INSIDE                 | 2.514                                                        | 6.193                          | 1542.14            | 9549.78            | 15.565                         | 819.74             | 12759.33           |
| A_68_P31220008 | chr17:49071618-49071662                           | NM_027452:-266         | Lrfn2         | PROMOTER               | 2.514                                                        | 5.727                          | 9111.94            | 52180.14           | 14.397                         | 5782.67            | 83254.10           |
| A_68_P27050627 | chr10:32609677-32609721                           | NM_001013411:23        | Nkain2        | INSIDE                 | 2.512                                                        | 7.636                          | 4966.00            | 37922.42           | 19.182                         | 3697.67            | 70929.86           |
| A_68_P24141205 | chr5:140865282-140865326                          | NM_172277:-103         | Snx8          | PROMOTER               | 2.512                                                        | 5.782                          | 13712.53           | 79285.45           | 14.522                         | 8932.21            | 129716.30          |
| A_68_P25522110 | chr7:137662756-137662800                          | NM_001136054:266       | Ate1          | INSIDE                 | 2.507                                                        | 2.149                          | 975.56             | 2096.60            | 5.388                          | 765.52             | 4124.45            |
| A_68_P31542491 | chr18:21160534-21160578                           | NM_019706:715          | Rnf138        | INSIDE                 | 2.507                                                        | 6.232                          | 7347.22            | 45784.44           | 15.622                         | 4984.46            | 77866.60           |
| A_68_P26469100 | chr9:44516622-44516666                            | NM_153537:26633        | Phldb1        | INSIDE                 | 2.502                                                        | 21.012                         | 5164.24            | 108511.90          | 52.574                         | 2894.18            | 152159.80          |
| A_68_P21587981 | chr2:122591010-122591054                          | NM_001162503:-62       | Sqrdl         | PROMOTER               | 2.501                                                        | 7.553                          | 2476.02            | 18700.67           | 18.891                         | 1784.22            | 33705.88           |
| A_68_P27265507 | chr10:76495860-76495904                           | NM_031196:-74          | Slc19a1       | PROMOTER               | 2.499                                                        | 9.071                          | 5096.34            | 46231.10           | 22.666                         | 3101.46            | 70297.76           |
| A_68_P27138494 | chr10:52410512-52410556                           | NM_178675:228          | Slc35f1       | INSIDE                 | 2.495                                                        | 3.924                          | 618.16             | 2425.63            | 9.792                          | 614.22             | 6014.29            |
| A_68_P25031610 | chr7:31242110-31242154                            | NM_172898:402          | Kirrel2       | INSIDE                 | 2.494                                                        | 15.068                         | 2274.51            | 34272.62           | 37.583                         | 1235.22            | 46423.38           |
| A_68_P26541141 | chr9:57109407-57109451                            | NM_028820:978          | 1700017B05Rik | INSIDE                 | 2.493                                                        | 5.134                          | 2336.99            | 11998.43           | 12.798                         | 1913.17            | 24484.04           |
| A_68_P22310075 | chr3:87600813-87600858                            | NM_011832:-37          | Insrr         | DIVERGENT_PROMOTER     | 2.490                                                        | 5.861                          | 4961.28            | 29078.26           | 14.593                         | 3144.29            | 45884.25           |
| A_68_P26465911 | chr9:43943262-43943306                            | NM_023061:544          | Mcam          | INSIDE                 | 2.490                                                        | 3.450                          | 1701.35            | 5869.09            | 8.589                          | 1308.16            | 11235.64           |
| A_68_P29624689 | chr14:57396463-57396507                           | NM_025682:669          | Pspc1         | INSIDE                 | 2.487                                                        | 5.474                          | 4853.09            | 26567.70           | 13.612                         | 3701.11            | 50381.05           |
| A_68_P28332409 | chr12:32319733-32319777                           | NM_001164090:-231      | Bcap29        | PROMOTER               | 2.486                                                        | 9.592                          | 2652.51            | 25441.57           | 23.849                         | 1708.35            | 40742.33           |
| A_68_P30659699 | chr16:33251415-33251459                           | NM_080557:-105         | Snx4          | PROMOTER               | 2.486                                                        | 10.407                         | 3440.30            | 35804.83           | 25.873                         | 2337.93            | 60489.97           |
| A_68_P32553143 | chrX:96238297-96238345                            | NM_199018:401          | Stard8        | INSIDE                 | 2.484                                                        | 6.859                          | 445.03             | 3052.42            | 17.039                         | 246.79             | 4205.01            |
| A_68_P29218716 | chr13:91599885-91599929                           | NM_024186:-795         | Ssbp2         | PROMOTER               | 2.476                                                        | 16.971                         | 563.62             | 9565.23            | 42.025                         | 488.52             | 20530.01           |
| A_68_P29338034 | chr13:113777821-113777865                         | NM_001081062:-167      | Ceno          | PROMOTER               | 2.475                                                        | 3.687                          | 601.99             | 2219.36            | 9.124                          | 484.42             | 4420.08            |
| A_68_P24449884 | chr6:52266647-52266691                            | NR_038163:-1842        | 5730457N03Rik | PROMOTER               | 2.474                                                        | 11.257                         | 8241.17            | 92768.87           | 27.844                         | 5150.16            | 143401.90          |
| A_68_P29643100 | chr14:60795943-60795987                           | ENSMUST00000140924:412 |               | INSIDE                 | 2.473                                                        | 5.834                          | 4663.00            | 27202.57           | 14.424                         | 3814.13            | 55015.58           |
| A_68_P23397281 | chr4:148275240-148275284                          | NM_027195:96762        | Cas21         | INSIDE                 | 2.472                                                        | 7.602                          | 17403.01           | 132294.10          | 18.791                         | 11859.44           | 222849.10          |
| A_68_P29237600 | chr13:95653897-95653941                           | NM_011021:8337         | Otp           | DOWNSTREAM             | 2.471                                                        | 2.116                          | 4449.75            | 9414.95            | 5.227                          | 3177.96            | 16612.19           |
| A_68_P31003040 | chr17:3084893-3084937                             | NR_003519:-731         | Pisd-ps2      | PROMOTER               | 2.471                                                        | 9.924                          | 20698.53           | 205421.40          | 24.520                         | 13630.62           | 334218.10          |
| A_68_P30784285 | chr16:57122018-57122062                           | NM_138599:214          | Tom70a        | INSIDE                 | 2.470                                                        | 9.905                          | 4797.46            | 47520.59           | 24.470                         | 3311.14            | 81023.28           |
| A_68_P21569910 | chr2:119303067-119303111                          | NM_026574:277          | Ino80         | INSIDE                 | 2.468                                                        | 6.138                          | 4882.70            | 29972.16           | 15.151                         | 3573.68            | 54146.25           |
| A_68_P20765302 | chr1:162125324-162125368                          | NM_025474:-44          | Mrps14        | PROMOTER               | 2.468                                                        | 10.418                         | 5914.69            | 61622.12           | 25.708                         | 3725.32            | 95770.00           |

| ProbeName      | Target position of probe on CpG island microarray | TargetID                 | GeneSymbol    | CpG island Description | Ratio of relative methylation (TiO <sub>2</sub> -NP/Vehicle) | Sham group                     |                    |                    | TiO <sub>2</sub> -H group      |                    |                    |
|----------------|---------------------------------------------------|--------------------------|---------------|------------------------|--------------------------------------------------------------|--------------------------------|--------------------|--------------------|--------------------------------|--------------------|--------------------|
|                |                                                   |                          |               |                        |                                                              | Relative methylation (Cy5/Cy3) | Cy3 signal (Input) | Cy5 signal (MeDIP) | Relative methylation (Cy5/Cy3) | Cy3 signal (Input) | Cy5 signal (MeDIP) |
| A_68_P26292118 | chr9:8544562-8544606                              | NM_013838:443            | Trpc6         | INSIDE                 | 2.466                                                        | 3.342                          | 924.53             | 3089.86            | 8.241                          | 744.87             | 6138.87            |
| A_68_P26742258 | chr9:95412445-95412489                            | NM_001114977:-51         | 2610101N10Rik | PROMOTER               | 2.465                                                        | 9.638                          | 28756.99           | 277163.20          | 23.754                         | 16578.52           | 393802.70          |
| A_68_P30350128 | chr15:76540931-76540975                           | NM_058214:37             | Recq4         | INSIDE                 | 2.464                                                        | 4.532                          | 3611.54            | 16368.01           | 11.166                         | 2597.51            | 29002.98           |
| A_68_P26164568 | chr8:113262460-113262504                          | NM_198625:17099          | Mss11         | INSIDE                 | 2.463                                                        | 10.638                         | 6103.81            | 64933.75           | 26.205                         | 4061.40            | 106430.50          |
| A_68_P28605007 | chr12:86940319-86940363                           | NM_030887:-25            | Jdp2          | PROMOTER               | 2.462                                                        | 7.922                          | 7190.55            | 56964.74           | 19.503                         | 5194.50            | 101306.80          |
| A_68_P32471622 | chrX:72661675-72661719                            | NM_010839:186            | Mtcp1         | INSIDE                 | 2.460                                                        | 3.523                          | 1439.66            | 5072.36            | 8.668                          | 783.74             | 6793.80            |
| A_68_P31618899 | chr18:35721824-35721868                           | NM_010771:35             | Matr3         | INSIDE                 | 2.459                                                        | 1.495                          | 1916.90            | 2865.17            | 3.676                          | 1857.74            | 6829.22            |
| A_68_P31934224 | chr19:6364358-6364402                             | NM_001110791:691         | Sfl           | INSIDE                 | 2.459                                                        | 12.680                         | 1791.20            | 22713.16           | 31.175                         | 1325.53            | 41323.44           |
| A_68_P22408449 | chr3:107563183-107563227                          | NM_001113529:183         | Csf1          | INSIDE                 | 2.457                                                        | 11.554                         | 10695.95           | 123580.20          | 28.391                         | 6189.87            | 175737.30          |
| A_68_P32817209 | chrX:165111905-165111949                          | NM_010832:-92            | Msl3          | PROMOTER               | 2.457                                                        | 2.364                          | 835.90             | 1976.12            | 5.809                          | 516.85             | 3002.34            |
| A_68_P32287119 | chrX:19637488-19637532                            | NM_021715:815            | Chst7         | INSIDE                 | 2.452                                                        | 3.851                          | 2163.89            | 8333.81            | 9.443                          | 1159.22            | 10946.07           |
| A_68_P32385147 | chrX:50341550-50341594                            | NM_013556:318            | Hprt          | INSIDE                 | 2.451                                                        | 3.348                          | 1957.19            | 6553.16            | 8.208                          | 1013.19            | 8316.29            |
| A_68_P30575400 | chr16:17734120-17734164                           |                          |               | Unknown                | 2.447                                                        | 6.556                          | 12299.05           | 80630.62           | 16.041                         | 9298.61            | 149159.30          |
| A_68_P22888054 | chr4:46318111-46318155                            | ENSMUST00000123933:38171 |               | INSIDE                 | 2.447                                                        | 4.268                          | 1176.07            | 5019.52            | 10.445                         | 855.56             | 8936.54            |
| A_68_P27688946 | chr11:32355594-32355638                           | NM_173784:245            | Ubtid2        | INSIDE                 | 2.445                                                        | 5.514                          | 5760.64            | 31763.89           | 13.479                         | 4170.34            | 56213.19           |
| A_68_P21762364 | chr2:154617306-154617350                          | NM_00113951:483          | Raly          | INSIDE                 | 2.443                                                        | 9.092                          | 3562.21            | 32388.11           | 22.209                         | 2473.01            | 54924.23           |
| A_68_P27293831 | chr10:82275065-82275109                           | NR_038042:219            | 1700028I16Rik | INSIDE                 | 2.437                                                        | 6.388                          | 11619.79           | 74232.92           | 15.569                         | 8124.71            | 126492.50          |
| A_68_P22921606 | chr4:53172577-53172621                            | NM_013454:169            | Abea1         | INSIDE                 | 2.437                                                        | 2.829                          | 163.57             | 462.78             | 6.896                          | 94.45              | 651.32             |
| A_68_P27315977 | chr10:86241971-86242015                           | NM_175331:243            | Nt5dc3        | INSIDE                 | 2.437                                                        | 8.680                          | 2362.38            | 20505.09           | 21.157                         | 1771.77            | 37484.74           |
| A_68_P23418024 | chr4:151700327-151700371                          | NM_009079:362            | Rpl22         | INSIDE                 | 2.437                                                        | 4.492                          | 1567.13            | 7039.64            | 10.946                         | 1298.21            | 14210.70           |
| A_68_P31427919 | A_68_P31427919                                    |                          |               | Unknown                | 2.436                                                        | 9.712                          | 763.42             | 7414.61            | 23.661                         | 575.48             | 13616.52           |
| A_68_P27862290 | chr11:63734698-63734742                           | NM_018805:1066           | Hs3st3b1      | INSIDE                 | 2.430                                                        | 7.416                          | 3406.97            | 25266.90           | 18.019                         | 2541.56            | 45797.47           |
| A_68_P23222249 | chr4:114580688-114580732                          | NM_008593:793            | Foxd2         | INSIDE                 | 2.427                                                        | 6.487                          | 1921.84            | 12467.91           | 15.742                         | 1486.86            | 23406.71           |
| A_68_P28585119 | chr12:83270170-83270214                           | NM_001167983:-810        | Sipa11        | PROMOTER               | 2.427                                                        | 9.389                          | 1250.51            | 11740.61           | 22.786                         | 826.90             | 18841.71           |
| A_68_P26085413 | chr8:98330883-98330927                            | NR_015574:175            | 4930513N10Rik | INSIDE                 | 2.426                                                        | 7.226                          | 17038.37           | 123120.90          | 17.533                         | 11905.60           | 208738.70          |
| A_68_P25456593 | chr7:125259495-125259539                          | NM_170669:145            | Rps15a        | INSIDE                 | 2.426                                                        | 5.742                          | 1683.11            | 9663.99            | 13.927                         | 1116.17            | 15544.89           |
| A_68_P27951947 | chr11:79787924-79787968                           |                          |               | Unknown                | 2.425                                                        | 2.515                          | 1153.67            | 2901.97            | 6.099                          | 1034.23            | 6307.86            |
| A_68_P21890601 | chr2:178148869-178148913                          | NM_001085501:287         | Ppp1r3d       | INSIDE                 | 2.424                                                        | 10.660                         | 2909.91            | 31019.30           | 25.839                         | 1951.87            | 50435.31           |
| A_68_P32766765 | chrX:153929388-153929432                          | NM_009214:568            | Sms           | INSIDE                 | 2.423                                                        | 5.494                          | 1673.83            | 9195.71            | 13.311                         | 1054.97            | 14042.84           |
| A_68_P32674751 | chrX:131543547-131543591                          | NM_175446:180            | Zmat1         | INSIDE                 | 2.422                                                        | 19.742                         | 5109.23            | 100864.00          | 47.809                         | 3031.64            | 144939.50          |
| A_68_P21143643 | chr2:37559408-37559452                            | ENSMUST00000155237:-51   |               | PROMOTER               | 2.422                                                        | 21.024                         | 2553.66            | 53687.95           | 50.919                         | 1577.89            | 80345.03           |
| A_68_P27938553 | chr11:77421084-77421128                           | NM_144825:211            | Taok1         | INSIDE                 | 2.421                                                        | 10.195                         | 1625.76            | 16575.32           | 24.688                         | 1096.06            | 27059.37           |
| A_68_P21100500 | chr2:29821292-29821336                            | NM_001076554:235         | Spna2         | INSIDE                 | 2.415                                                        | 5.503                          | 3190.19            | 17554.30           | 13.290                         | 2465.20            | 32762.30           |
| A_68_P20768477 | chr1:162723220-162723264                          | NM_013862:-173           | Rabgap11      | PROMOTER               | 2.414                                                        | 12.018                         | 13257.93           | 159330.70          | 29.007                         | 7275.12            | 211026.50          |
| A_68_P28688419 | chr12:103150855-103150899                         | NM_028446:505            | Trip11        | INSIDE                 | 2.414                                                        | 4.319                          | 6889.77            | 29759.31           | 10.425                         | 5098.42            | 53151.19           |
| A_68_P23288229 | chr4:127665953-127665997                          | ENSMUST00000144298:687   |               | INSIDE                 | 2.412                                                        | 4.500                          | 4613.46            | 20761.36           | 10.856                         | 3159.82            | 34303.98           |
| A_68_P29871680 | chr14:104872642-104872686                         | NM_011143:-5448          | Pou4f1        | PROMOTER               | 2.411                                                        | 11.000                         | 6367.29            | 70042.71           | 26.520                         | 4744.22            | 125818.80          |
| A_68_P20239578 | chr1:54983378-54983422                            | NM_001081433:-169        | Ankrd44       | PROMOTER               | 2.409                                                        | 2.608                          | 6346.65            | 16554.50           | 6.284                          | 4761.34            | 29920.98           |
| A_68_P31544271 | chr18:21458929-21458973                           | NM_001033445:-310        | Fam59a        | PROMOTER               | 2.408                                                        | 7.221                          | 15083.00           | 108913.00          | 17.386                         | 9309.07            | 161852.10          |
| A_68_P32260801 | chrX:11735963-11736007                            | NM_001168321:1497        | Bcor          | INSIDE                 | 2.406                                                        | 5.141                          | 2235.03            | 11489.89           | 12.371                         | 1508.11            | 18656.45           |
| A_68_P30572936 | chr16:17276365-17276409                           | NM_177473:-6             | Tmem191c      | PROMOTER               | 2.406                                                        | 10.155                         | 1116.24            | 11334.84           | 24.427                         | 920.55             | 22486.71           |
| A_68_P30550104 | chr16:11984103-11984147                           | NM_001174086:-81         | Shisa9        | PROMOTER               | 2.405                                                        | 2.187                          | 9712.97            | 21244.19           | 5.261                          | 6807.54            | 35811.66           |
| A_68_P27282935 | A_68_P27282935                                    |                          |               | Unknown                | 2.403                                                        | 14.380                         | 970.24             | 13952.13           | 34.556                         | 611.57             | 21133.49           |
| A_68_P23594805 | chr5:34868409-34868453                            | NM_011893:-2             | Sh3bp2        | PROMOTER               | 2.402                                                        | 20.833                         | 5614.36            | 116962.20          | 50.042                         | 3150.32            | 156648.20          |
| A_68_P32441102 | chrX:65932146-65932191                            | NM_008031:439            | Fmr1          | INSIDE                 | 2.396                                                        | 4.896                          | 1079.66            | 5286.01            | 11.733                         | 634.73             | 7447.07            |
| A_68_P24820868 | chr6:125444847-125444891                          | NM_007657:-95            | Cd9           | PROMOTER               | 2.390                                                        | 11.281                         | 9567.66            | 107930.20          | 26.957                         | 5477.58            | 147659.80          |
| A_68_P29455876 | chr14:22805255-22805299                           | NM_145459:3547           | Zfp503        | INSIDE                 | 2.388                                                        | 4.903                          | 8384.65            | 41113.51           | 11.710                         | 5045.05            | 59078.81           |
| A_68_P24089922 | chr5:130089988-130090034                          | NM_011846:-78            | Mmp17         | PROMOTER               | 2.386                                                        | 10.764                         | 5163.23            | 55575.58           | 25.684                         | 3039.76            | 78072.02           |
| A_68_P31117105 | chr17:27693117-27693161                           | NM_001025427:-380        | Hmgal1        | PROMOTER               | 2.385                                                        | 5.460                          | 803.42             | 4386.29            | 13.019                         | 638.81             | 8316.76            |
| A_68_P22412541 | chr3:108218746-108218790                          | NM_001004177:-356        | Celsr2        | PROMOTER               | 2.381                                                        | 3.887                          | 1745.81            | 6786.45            | 9.257                          | 1460.57            | 13520.87           |
| A_68_P28043617 | chr11:96166483-96166527                           | NM_008268:1679           | Hoxb5         | INSIDE                 | 2.377                                                        | 2.543                          | 7392.87            | 18798.29           | 6.045                          | 5490.85            | 33193.03           |

| ProbeName      | Target position of probe on CpG island microarray | TargetID           | GeneSymbol    | CpG island Description | Ratio of relative methylation (TiO <sub>2</sub> -NP/Vehicle) | Sham group                     |                    |                    | TiO <sub>2</sub> -H group      |                    |                    |
|----------------|---------------------------------------------------|--------------------|---------------|------------------------|--------------------------------------------------------------|--------------------------------|--------------------|--------------------|--------------------------------|--------------------|--------------------|
|                |                                                   |                    |               |                        |                                                              | Relative methylation (Cy5/Cy3) | Cy3 signal (Input) | Cy5 signal (MeDIP) | Relative methylation (Cy5/Cy3) | Cy3 signal (Input) | Cy5 signal (MeDIP) |
| A_68_P28051732 | chr11:97489553-97489597                           | NM_175332:1456     | E130012A19Rik | INSIDE                 | 2.375                                                        | 10.917                         | 6860.96            | 74899.38           | 25.922                         | 4341.43            | 112540.60          |
| A_68_P28069996 | chr11:100621272-100621316                         | NM_001081194:-202  | Kenb4         | PROMOTER               | 2.374                                                        | 4.449                          | 752.81             | 3349.60            | 10.562                         | 555.22             | 5864.15            |
| A_68_P23278482 | chr4:125826960-125827005                          | NM_172145:1736     | Fam176b       | INSIDE                 | 2.373                                                        | 12.234                         | 2471.48            | 30237.07           | 29.028                         | 1293.78            | 37556.21           |
| A_68_P25770033 | chr8:34764110-34764154                            | NM_010344:423      | Gsr           | INSIDE                 | 2.372                                                        | 5.357                          | 3869.14            | 20727.80           | 12.708                         | 3194.58            | 40595.16           |
| A_68_P31201770 | chr17:45692568-45692612                           | NM_008690:-74      | Nfkbc1        | DIVERGENT_PROMOTER     | 2.372                                                        | 9.998                          | 12623.07           | 126210.50          | 23.715                         | 8032.57            | 190492.00          |
| A_68_P22532055 | chr3:131153686-131153730                          |                    |               | Unknown                | 2.371                                                        | 10.441                         | 2576.84            | 26904.95           | 24.751                         | 1612.79            | 39917.49           |
| A_68_P32760538 | chrX:152057229-152057273                          | NM_001093750:620   | Ptchd1        | INSIDE                 | 2.370                                                        | 7.084                          | 3332.40            | 23607.79           | 16.787                         | 2229.53            | 37426.19           |
| A_68_P28936016 | chr13:34094703-34094748                           | NM_009068:-17      | Ripk1         | DIVERGENT_PROMOTER     | 2.369                                                        | 5.834                          | 3745.72            | 21850.67           | 13.820                         | 2666.49            | 36851.95           |
| A_68_P25372610 | chr7:108469852-108469896                          | NM_019990:42       | Stard10       | INSIDE                 | 2.367                                                        | 5.981                          | 15543.06           | 92958.13           | 14.156                         | 11160.96           | 157990.00          |
| A_68_P26886028 | chr9:121766761-121766805                          | NM_001112668:-133  | Gm9790        | PROMOTER               | 2.363                                                        | 5.533                          | 4191.24            | 23188.72           | 13.072                         | 3175.11            | 41505.89           |
| A_68_P27781641 | chr11:48982982-48983026                           | NM_172793:17587    | Btnl9         | INSIDE                 | 2.360                                                        | 0.624                          | 1571.69            | 981.26             | 1.473                          | 1783.94            | 2628.61            |
| A_68_P24381989 | chr6:39155596-39155640                            | NM_001033430:1154  | Jhdm1d        | INSIDE                 | 2.359                                                        | 5.189                          | 5116.70            | 26550.66           | 12.238                         | 3987.22            | 48797.57           |
| A_68_P27536264 | chr10:126948850-126948894                         | NM_001098789:-3122 | Ndufa4l2      | PROMOTER               | 2.359                                                        | 3.890                          | 1188.21            | 4622.23            | 9.177                          | 968.88             | 8890.91            |
| A_68_P21017263 | chr2:13495869-13495913                            | NM_011701:-47      | Vim           | PROMOTER               | 2.359                                                        | 3.510                          | 257.85             | 905.15             | 8.280                          | 190.22             | 1574.90            |
| A_68_P32533286 | chrX:90544628-90544672                            | NM_007492:12666    | Arx           | DOWNSTREAM             | 2.358                                                        | 4.450                          | 2021.28            | 8993.94            | 10.492                         | 1357.54            | 14243.46           |
| A_68_P28567140 | chr12:80108151-80108195                           | NM_178745:92       | Tmem229b      | INSIDE                 | 2.358                                                        | 6.724                          | 9582.42            | 64433.40           | 15.858                         | 7192.83            | 114067.00          |
| A_68_P32578106 | chrX:101866324-101866368                          | NM_175358:57       | Zdhhc15       | INSIDE                 | 2.357                                                        | 1.895                          | 739.72             | 1402.08            | 4.467                          | 457.94             | 2045.51            |
| A_68_P28149790 | chr11:114652964-114653008                         | NM_028055:4220     | Btbd17        | INSIDE                 | 2.356                                                        | 6.334                          | 2909.45            | 18427.57           | 14.919                         | 2289.11            | 34151.24           |
| A_68_P31936825 | chr19:7016840-7016884                             | NM_001177361:78    | Gpr137        | INSIDE                 | 2.355                                                        | 1.625                          | 788.65             | 1281.49            | 3.826                          | 596.15             | 2280.83            |
| A_68_P23777458 | chr5:69732840-69732884                            | NM_175519:86       | Kctd8         | INSIDE                 | 2.354                                                        | 17.034                         | 6463.80            | 110101.70          | 40.098                         | 4087.66            | 163905.10          |
| A_68_P32268347 | chrX:13423633-13423677                            | NM_009806:13       | Cask          | INSIDE                 | 2.352                                                        | 4.775                          | 4033.45            | 19260.09           | 11.231                         | 2219.51            | 24926.78           |
| A_68_P24590984 | chr6:82983529-82983573                            | NM_010070:-85      | Dok1          | DIVERGENT_PROMOTER     | 2.352                                                        | 3.562                          | 1137.34            | 4051.68            | 8.379                          | 847.92             | 7104.88            |
| A_68_P32563826 | chrX:98580104-98580148                            | NM_008124:7451     | Gjb1          | INSIDE                 | 2.352                                                        | 3.539                          | 937.42             | 3317.78            | 8.324                          | 424.00             | 3529.44            |
| A_68_P31256333 | chr17:56601586-56601630                           | NM_011218:14295    | Ptprs         | INSIDE                 | 2.352                                                        | 1.518                          | 961.67             | 1459.97            | 3.570                          | 669.84             | 2391.35            |
| A_68_P31311926 | chr17:67704196-67704240                           | NM_008984:-419     | Ptprm         | PROMOTER               | 2.351                                                        | 6.912                          | 3804.89            | 26300.93           | 16.250                         | 2810.62            | 45673.54           |
| A_68_P30650943 | chr16:32099956-32100000                           | NM_025892:91       | 1500031L02Rik | INSIDE                 | 2.348                                                        | 3.775                          | 7748.81            | 29255.63           | 8.866                          | 5745.28            | 50940.39           |
| A_68_P26827666 | chr9:111020550-111020594                          | NM_001164838:-42   | Lrrfip2       | PROMOTER               | 2.347                                                        | 5.128                          | 3893.76            | 19967.23           | 12.037                         | 2948.94            | 35497.62           |
| A_68_P29032310 | chr13:51503858-51503902                           | NM_010101:-106     | Sp1r3         | PROMOTER               | 2.347                                                        | 4.881                          | 1406.71            | 6866.52            | 11.458                         | 969.33             | 11106.33           |
| A_68_P22299774 | chr3:85691661-85691705                            | NM_177130:-242     | Glt2d2        | PROMOTER               | 2.345                                                        | 6.115                          | 2137.83            | 13071.99           | 14.340                         | 1643.46            | 23567.60           |
| A_68_P20741945 | chr11:158134987-158135031                         | NM_177838:148      | Fam163a       | INSIDE                 | 2.344                                                        | 0.728                          | 1936.10            | 1410.28            | 1.708                          | 1837.68            | 3138.08            |
| A_68_P21109951 | chr2:31428059-31428103                            | NM_001033389:-164  | Fubp3         | PROMOTER               | 2.343                                                        | 13.413                         | 1326.63            | 17793.56           | 31.430                         | 941.46             | 29589.95           |
| A_68_P27569379 | chr11:6505657-6505701                             | NM_001081652:379   | Nacad         | INSIDE                 | 2.343                                                        | 8.268                          | 5339.75            | 44151.53           | 19.370                         | 3628.25            | 70280.29           |
| A_68_P24604715 | chr6:85324050-85324094                            | NM_001003955:556   | Rab11fip5     | INSIDE                 | 2.343                                                        | 8.621                          | 4194.89            | 36164.41           | 20.197                         | 2530.98            | 51118.48           |
| A_68_P25505713 | chr7:134615484-134615528                          | NM_145589:379      | Prr14         | INSIDE                 | 2.340                                                        | 4.798                          | 2228.95            | 10694.08           | 11.228                         | 1578.60            | 17725.31           |
| A_68_P31112418 | chr17:26918319-26918363                           | NM_172149:317      | Bnip1         | INSIDE                 | 2.338                                                        | 3.275                          | 5084.44            | 16652.05           | 7.656                          | 3514.57            | 26906.28           |
| A_68_P32365934 | chrX:46048429-46048473                            | NM_173376:270      | Rbmx2         | INSIDE                 | 2.338                                                        | 12.123                         | 3931.16            | 47655.81           | 28.346                         | 2266.75            | 64254.35           |
| A_68_P20556967 | chr11:121317480-121317524                         | NM_008381:1323     | Inhbb         | INSIDE                 | 2.337                                                        | 6.799                          | 1585.18            | 10777.19           | 15.888                         | 1233.25            | 19593.83           |
| A_68_P24039940 | chr5:121081339-121081383                          | NM_001195094:2884  | Ccdc42b       | INSIDE                 | 2.335                                                        | 2.020                          | 661.34             | 1335.89            | 4.717                          | 629.67             | 2969.92            |
| A_68_P29958338 | chr14:122278102-122278146                         | NM_026861:297      | Ubac2         | INSIDE                 | 2.334                                                        | 4.232                          | 2780.86            | 11768.46           | 9.877                          | 2012.80            | 19879.47           |
| A_68_P23244381 | chr4:118905195-118905239                          | NM_001012400:113   | AU022252      | INSIDE                 | 2.333                                                        | 2.690                          | 5994.47            | 16124.96           | 6.275                          | 4417.41            | 27719.49           |
| A_68_P21621794 | chr2:128690006-128690050                          | NM_024237:361      | Fbln7         | INSIDE                 | 2.332                                                        | 1.496                          | 749.56             | 1121.25            | 3.489                          | 627.27             | 2188.52            |
| A_68_P25645821 | chr8:9976314-9976358                              | NM_176953:-13      | Lig4          | DIVERGENT_PROMOTER     | 2.332                                                        | 7.229                          | 11513.48           | 83233.88           | 16.857                         | 7753.00            | 130696.00          |
| A_68_P28989794 | chr13:43460884-43460928                           | NM_178848:-5178    | Sirt5         | PROMOTER               | 2.332                                                        | 3.269                          | 1508.13            | 4930.73            | 7.626                          | 1101.35            | 8398.55            |
| A_68_P21334154 | chr2:73729891-73729935                            | NM_001025093:773   | Atf2          | INSIDE                 | 2.330                                                        | 9.939                          | 23555.36           | 234127.40          | 23.161                         | 14168.05           | 328151.80          |
| A_68_P31373358 | chr17:79136029-79136073                           | NM_011500:-150     | Strn          | PROMOTER               | 2.327                                                        | 2.976                          | 1194.14            | 3553.45            | 6.925                          | 955.41             | 6616.44            |
| A_68_P31428327 | chr17:88929344-88929388                           | NM_028658:-97      | Klraq1        | PROMOTER               | 2.326                                                        | 8.666                          | 2680.12            | 23227.16           | 20.154                         | 1767.89            | 35629.85           |
| A_68_P24004683 | chr5:115017800-115017844                          | NM_001004180:-437  | BC057022      | PROMOTER               | 2.324                                                        | 15.416                         | 3357.74            | 51764.02           | 35.833                         | 2417.21            | 86615.99           |
| A_68_P27564951 | chr11:5688365-5688409                             | NM_001146308:-99   | Dbnl          | PROMOTER               | 2.322                                                        | 6.341                          | 2538.53            | 16095.66           | 14.726                         | 1987.15            | 29262.25           |
| A_68_P23336241 | chr4:136391071-136391115                          | NM_010142:758      | Ephb2         | INSIDE                 | 2.322                                                        | 3.395                          | 3359.27            | 11404.09           | 7.883                          | 2536.99            | 19998.83           |
| A_68_P25016756 | chr7:28119811-28119855                            | NM_001113549:-1165 | Ltbp4         | PROMOTER               | 2.321                                                        | 7.348                          | 4064.11            | 29862.64           | 17.053                         | 2879.70            | 49106.29           |
| A_68_P25009065 | chr7:26004933-26004977                            | NM_207677:-76      | Dedd2         | DIVERGENT_PROMOTER     | 2.316                                                        | 2.652                          | 8195.44            | 21737.08           | 6.143                          | 5505.81            | 33821.86           |

| ProbeName      | Target position of probe on CpG island microarray | TargetID           | GeneSymbol    | CpG island Description | Ratio of relative methylation (TiO <sub>2</sub> -NP/Vehicle) | Sham group                     |                    |                    | TiO <sub>2</sub> -H group      |                    |                    |
|----------------|---------------------------------------------------|--------------------|---------------|------------------------|--------------------------------------------------------------|--------------------------------|--------------------|--------------------|--------------------------------|--------------------|--------------------|
|                |                                                   |                    |               |                        |                                                              | Relative methylation (Cy5/Cy3) | Cy3 signal (Input) | Cy5 signal (MeDIP) | Relative methylation (Cy5/Cy3) | Cy3 signal (Input) | Cy5 signal (MeDIP) |
| A_68_P28530101 | chr12:73186989-73187033                           | NM_001205067:185   | Jkamp         | INSIDE                 | 2.316                                                        | 6.814                          | 2167.14            | 14767.70           | 15.779                         | 1323.51            | 20883.40           |
| A_68_P27095209 | chr10:42222002-42222046                           | NM_017472:165      | Snx3          | INSIDE                 | 2.314                                                        | 4.285                          | 1119.07            | 4795.47            | 9.918                          | 862.62             | 8555.08            |
| A_68_P32260371 | chrX:11668288-11668332                            | NM_001168321:69171 | Bcor          | INSIDE                 | 2.313                                                        | 1.587                          | 1844.59            | 2926.56            | 3.669                          | 931.85             | 3419.40            |
| A_68_P23980413 | chr5:110973506-110973550                          | NM_198306:165      | Galnt9        | INSIDE                 | 2.313                                                        | 2.123                          | 903.04             | 1916.98            | 4.911                          | 837.52             | 4113.03            |
| A_68_P22951804 | chr4:58566187-58566231                            | NM_172989:-43      | Lpar1         | PROMOTER               | 2.313                                                        | 12.789                         | 2033.78            | 26009.86           | 29.587                         | 1471.32            | 43531.41           |
| A_68_P28997682 | chr13:44829049-44829093                           | NM_001205043:2431  | Jarid2        | INSIDE                 | 2.312                                                        | 8.821                          | 15712.06           | 138592.40          | 20.390                         | 9201.23            | 187610.30          |
| A_68_P31144954 | chr17:32457616-32457660                           | NM_019774:460      | Akap8         | INSIDE                 | 2.308                                                        | 6.815                          | 5331.38            | 36334.12           | 15.732                         | 3796.01            | 59720.41           |
| A_68_P20149055 | chr1:36615091-36615135                            | NM_001126047:114   | Sema4c        | INSIDE                 | 2.308                                                        | 2.850                          | 1328.56            | 3786.16            | 6.578                          | 972.00             | 6393.64            |
| A_68_P32340723 | chrX:39421307-39421351                            | NM_009688:316      | Xiap          | INSIDE                 | 2.308                                                        | 3.837                          | 2381.77            | 9138.39            | 8.854                          | 1191.40            | 10548.87           |
| A_68_P32365932 | chrX:46048174-46048218                            | NM_173376:16       | Rbmx2         | INSIDE                 | 2.307                                                        | 1.483                          | 755.30             | 1119.85            | 3.421                          | 464.12             | 1587.86            |
| A_68_P29342439 | chr13:114584551-114584595                         | NM_172595:-143     | Arl15         | PROMOTER               | 2.306                                                        | 6.894                          | 13305.65           | 91725.86           | 15.896                         | 9055.61            | 143951.40          |
| A_68_P25176629 | chr7:71518985-71519029                            | NM_177893:-25      | Fan1          | PROMOTER               | 2.306                                                        | 4.347                          | 1205.52            | 5239.99            | 10.023                         | 908.82             | 9109.01            |
| A_68_P27302613 | chr10:83903670-83903714                           | NM_001004363:-476  | Nuak1         | PROMOTER               | 2.305                                                        | 2.296                          | 907.95             | 2084.57            | 5.293                          | 794.46             | 4204.96            |
| A_68_P32260816 | chrX:11737647-11737691                            | NM_001168321:-187  | Bcor          | PROMOTER               | 2.303                                                        | 3.008                          | 999.15             | 3005.25            | 6.928                          | 525.11             | 3638.03            |
| A_68_P30596436 | chr16:22163233-22163277                           | NM_183029:118      | Igf2bp2       | INSIDE                 | 2.303                                                        | 7.747                          | 847.67             | 6567.12            | 17.840                         | 768.85             | 13716.50           |
| A_68_P21571253 | chr2:119569096-119569140                          | NM_146125:1046     | Itpka         | INSIDE                 | 2.303                                                        | 3.874                          | 2504.23            | 9700.66            | 8.922                          | 1955.76            | 17450.11           |
| A_68_P21013699 | chr2:12932692-12932736                            | NM_153155:-223     | C1ql3         | PROMOTER               | 2.302                                                        | 10.537                         | 2128.50            | 22428.25           | 24.254                         | 1494.20            | 36239.69           |
| A_68_P32263512 | chrX:12339036-12339080                            | NM_001048208:41    | Med14         | INSIDE                 | 2.302                                                        | 6.479                          | 885.86             | 5739.19            | 14.914                         | 563.91             | 8410.04            |
| A_68_P27856224 | chr11:62692825-62692869                           | NM_026210:-145     | Fam18b        | PROMOTER               | 2.301                                                        | 8.002                          | 44876.32           | 359089.20          | 18.410                         | 25812.74           | 475218.60          |
| A_68_P22085568 | chr3:41368782-41368826                            | NM_001130186:3     | Phf17         | INSIDE                 | 2.300                                                        | 18.229                         | 4332.09            | 78968.20           | 41.924                         | 2483.05            | 104099.50          |
| A_68_P32683852 | chrX:133584183-133584227                          | NM_146261:72       | Fam199x       | INSIDE                 | 2.299                                                        | 5.605                          | 36252.91           | 203197.50          | 12.886                         | 25460.36           | 328071.30          |
| A_68_P21820794 | chr2:164793741-164793785                          | NM_020333:275      | Slc12a5       | INSIDE                 | 2.299                                                        | 8.368                          | 8253.59            | 69064.27           | 19.241                         | 5190.38            | 99869.07           |
| A_68_P28183801 | chr11:120166516-120166560                         |                    |               | Unknown                | 2.298                                                        | 12.608                         | 2249.12            | 28357.44           | 28.973                         | 1397.42            | 40487.78           |
| A_68_P23262658 | chr4:123089142-123089186                          | NM_001167918:-10   | D830031N03Rik | PROMOTER               | 2.296                                                        | 9.442                          | 1728.54            | 16320.16           | 21.680                         | 1397.75            | 30303.05           |
| A_68_P32240004 | chrX:7327982-7328026                              | NR_030454:-2210    | Mir684-1      | DIVERGENT_PROMOTER     | 2.296                                                        | 3.799                          | 1605.13            | 6098.03            | 8.723                          | 894.64             | 7803.66            |
| A_68_P31253474 | chr17:56175980-56176024                           | NM_013664:-3       | Sh3gl1        | DIVERGENT_PROMOTER     | 2.295                                                        | 5.057                          | 8492.46            | 42943.44           | 11.605                         | 6803.83            | 78960.70           |
| A_68_P26658155 | chr9:77956059-77956103                            | NM_023605:383      | Fbxo9         | INSIDE                 | 2.294                                                        | 9.040                          | 3947.31            | 35683.72           | 20.740                         | 3181.35            | 65981.75           |
| A_68_P29055232 | chr13:55574226-55574270                           | NM_001030296:8621  | Prr7          | INSIDE                 | 2.293                                                        | 2.788                          | 1306.19            | 3641.47            | 6.394                          | 1054.80            | 6744.14            |
| A_68_P31838828 | chr18:75857092-75857136                           | NM_201354:236      | Ctlf          | INSIDE                 | 2.291                                                        | 9.102                          | 4442.49            | 40434.40           | 20.853                         | 3496.62            | 72913.37           |
| A_68_P24449533 | chr6:52211079-52211123                            | NM_008264:-226     | Hoxa13        | PROMOTER               | 2.290                                                        | 6.551                          | 2969.10            | 19450.39           | 15.000                         | 2271.12            | 34065.81           |
| A_68_P23325610 | chr4:134487232-134487276                          | NM_026780:360      | Syf2          | INSIDE                 | 2.288                                                        | 21.890                         | 11179.55           | 244721.20          | 50.094                         | 7846.17            | 393047.30          |
| A_68_P31764312 | chr18:62708242-62708286                           | NM_134136:133      | Fbxo38        | INSIDE                 | 2.287                                                        | 2.829                          | 9614.08            | 27195.70           | 6.469                          | 6425.64            | 41568.23           |
| A_68_P25766302 | chr8:33994797-33994841                            | NM_001177589:65680 | Gm3985        | DOWNSTREAM             | 2.287                                                        | 9.404                          | 1069.61            | 10058.46           | 21.510                         | 750.44             | 16141.86           |
| A_68_P20455835 | chr1:95374821-95374865                            | NM_133808:543      | Hdlbp         | INSIDE                 | 2.286                                                        | 5.679                          | 1908.50            | 10839.24           | 12.985                         | 1421.38            | 18456.94           |
| A_68_P26772513 | chr9:100935215-100935259                          | NM_025835:58       | Pccb          | INSIDE                 | 2.286                                                        | 4.099                          | 7042.17            | 28866.25           | 9.370                          | 5402.54            | 50619.91           |
| A_68_P25809870 | chr8:42325280-42325324                            | NM_023662:190      | Pem1          | INSIDE                 | 2.286                                                        | 10.549                         | 531.79             | 5609.94            | 24.115                         | 415.82             | 10027.66           |
| A_68_P25499304 | chr7:133344026-133344070                          | NM_028816:-126     | Xpo6          | PROMOTER               | 2.285                                                        | 19.109                         | 8771.90            | 167619.40          | 43.660                         | 5610.62            | 244958.70          |
| A_68_P23366440 | chr4:141430540-141430584                          | NM_025994:273      | Efh2          | INSIDE                 | 2.283                                                        | 2.694                          | 1008.85            | 2717.95            | 6.150                          | 893.14             | 5493.12            |
| A_68_P32265729 | chrX:12858825-12858869                            | NM_010028:699      | Ddx3x         | INSIDE                 | 2.282                                                        | 1.824                          | 882.91             | 1610.03            | 4.162                          | 582.92             | 2425.88            |
| A_68_P22487800 | chr3:123088652-123088696                          | NM_201638:234      | Mettl14       | INSIDE                 | 2.281                                                        | 7.737                          | 8006.62            | 61947.64           | 17.649                         | 5831.80            | 102926.20          |
| A_68_P30244836 | chr15:57723668-57723712                           | NM_024207:283      | Der11         | INSIDE                 | 2.280                                                        | 1.624                          | 1458.51            | 2367.91            | 3.701                          | 1125.77            | 4166.54            |
| A_68_P20849641 | chr1:177622831-177622875                          | NM_010098:-131     | Opn3          | DIVERGENT_PROMOTER     | 2.280                                                        | 1.833                          | 6986.01            | 12806.43           | 4.180                          | 5290.64            | 22112.28           |
| A_68_P27965917 | chr11:82200919-82200963                           | NM_023438:-1461    | Tmem132e      | PROMOTER               | 2.280                                                        | 7.265                          | 2269.87            | 16491.30           | 16.564                         | 1718.62            | 28467.81           |
| A_68_P20023664 | chr1:9690196-9690240                              | NM_008651:72       | Mybl1         | INSIDE                 | 2.277                                                        | 6.956                          | 950.56             | 6612.18            | 15.839                         | 788.81             | 12494.10           |
| A_68_P25262217 | chr7:86762595-86762639                            | NM_019799:-73      | Rhcg          | PROMOTER               | 2.277                                                        | 16.815                         | 2412.43            | 40564.86           | 38.284                         | 1425.80            | 54585.64           |
| A_68_P23322032 | chr4:133843514-133843558                          | NM_001163794:-368  | Pdik11        | PROMOTER               | 2.276                                                        | 2.424                          | 1209.39            | 2931.15            | 5.516                          | 959.27             | 5291.41            |
| A_68_P23927384 | chr5:100467950-100467994                          | NM_016690:269      | Hnrpd1        | INSIDE                 | 2.275                                                        | 5.958                          | 5826.38            | 34711.57           | 13.556                         | 4005.52            | 54299.33           |
| A_68_P28538319 | chr12:74685927-74685971                           | NM_008856:-79      | Prcbh         | PROMOTER               | 2.273                                                        | 3.609                          | 351.00             | 1266.84            | 8.205                          | 326.89             | 2682.09            |
| A_68_P27083521 | chr10:40069136-40069180                           | NM_001168304:45    | Cdk19         | INSIDE                 | 2.272                                                        | 7.152                          | 461.33             | 3299.64            | 16.254                         | 351.42             | 5711.81            |
| A_68_P27937689 | chr11:77275784-77275828                           | NM_139128:-1608    | Coro6         | PROMOTER               | 2.271                                                        | 3.704                          | 1483.14            | 5493.90            | 8.411                          | 1145.14            | 9631.95            |
| A_68_P27095712 | chr10:42303728-42303772                           | NM_152229:-356     | Nr2e1         | PROMOTER               | 2.271                                                        | 12.858                         | 11284.84           | 145096.10          | 29.199                         | 7978.87            | 232972.60          |

| ProbeName      | Target position of probe on CpG island microarray | TargetID                | GeneSymbol    | CpG island Description | Ratio of relative methylation (TiO <sub>2</sub> -NP/Vehicle) | Sham group                     |                    |                    | TiO <sub>2</sub> -H group      |                    |                    |
|----------------|---------------------------------------------------|-------------------------|---------------|------------------------|--------------------------------------------------------------|--------------------------------|--------------------|--------------------|--------------------------------|--------------------|--------------------|
|                |                                                   |                         |               |                        |                                                              | Relative methylation (Cy5/Cy3) | Cy3 signal (Input) | Cy5 signal (MeDIP) | Relative methylation (Cy5/Cy3) | Cy3 signal (Input) | Cy5 signal (MeDIP) |
| A_68_P28598113 | chr12:85749685-85749729                           | NM_001026214:273        | Entpd5        | INSIDE                 | 2.269                                                        | 3.661                          | 3028.24            | 11086.95           | 8.308                          | 2223.13            | 18468.75           |
| A_68_P27185080 | chr10:61732562-61732606                           | NM_001146100:70585      | Hk1           | INSIDE                 | 2.269                                                        | 10.646                         | 2773.56            | 29527.97           | 24.158                         | 2096.18            | 50638.62           |
| A_68_P28159656 | chr11:116351010-116351061                         | NM_026364:625           | Prpsap1       | INSIDE                 | 2.269                                                        | 17.758                         | 4033.71            | 71630.06           | 40.290                         | 2464.90            | 99310.50           |
| A_68_P25616602 | chr8:4217183-4217227                              | NM_207203:108           | BC068157      | INSIDE                 | 2.268                                                        | 2.780                          | 1157.85            | 3218.82            | 6.304                          | 970.70             | 6119.43            |
| A_68_P31948062 | chr19:10115784-10115828                           | NM_021890:-231          | Fads3         | PROMOTER               | 2.268                                                        | 7.995                          | 626.39             | 5008.14            | 18.133                         | 509.60             | 9240.45            |
| A_68_P27558730 | chr11:4537928-4537972                             | NM_029291:155           | Ascc2         | INSIDE                 | 2.265                                                        | 8.303                          | 1676.18            | 13917.18           | 18.803                         | 1201.82            | 22597.63           |
| A_68_P31499629 | chr18:12395086-12395130                           | NM_008720:-213          | Npc1          | PROMOTER               | 2.263                                                        | 5.827                          | 3711.66            | 21629.28           | 13.187                         | 2940.31            | 38774.14           |
| A_68_P20088280 | A_68_P20088280                                    |                         |               | Unknown                | 2.263                                                        | 6.286                          | 1897.88            | 11930.69           | 14.227                         | 1381.63            | 19656.91           |
| A_68_P31152238 | chr17:34259488-34259532                           | NM_010238:-818          | Brd2          | PROMOTER               | 2.262                                                        | 8.753                          | 1863.76            | 16313.88           | 19.798                         | 1695.39            | 33564.70           |
| A_68_P24338521 | chr6:31513401-31513445                            | NM_013723:515           | Podxl         | INSIDE                 | 2.261                                                        | 5.210                          | 1194.73            | 6224.80            | 11.778                         | 960.89             | 11317.24           |
| A_68_P21625558 | chr2:129418959-129419003                          | NM_001177647:50         | Sirpa         | INSIDE                 | 2.259                                                        | 2.888                          | 1133.84            | 3275.07            | 6.526                          | 933.94             | 6095.30            |
| A_68_P29308205 | chr13:108680813-108680857                         | NM_145456:-576          | Zswim6        | PROMOTER               | 2.259                                                        | 1.450                          | 1072.99            | 1555.79            | 3.276                          | 830.04             | 2719.13            |
| A_68_P22450560 | chr3:116365543-116365587                          | NM_008246:31            | Hiat1         | INSIDE                 | 2.258                                                        | 4.123                          | 1719.69            | 7090.76            | 9.309                          | 1240.40            | 11546.41           |
| A_68_P25023454 | chr7:29551526-29551579                            | NM_010908:-9            | Nfkbib        | DIVERGENT_PROMOTER     | 2.257                                                        | 8.477                          | 713.98             | 6052.27            | 19.133                         | 530.50             | 10149.87           |
| A_68_P25837064 | chr8:47702719-47702763                            | NM_009810:-62           | Casp3         | DIVERGENT_PROMOTER     | 2.255                                                        | 8.065                          | 13019.36           | 104998.00          | 18.182                         | 9442.59            | 171689.80          |
| A_68_P32464980 | chrX:71069698-71069742                            | NM_001029868:588        | Pdzd4         | INSIDE                 | 2.253                                                        | 5.144                          | 453.64             | 2333.58            | 11.591                         | 243.90             | 2826.91            |
| A_68_P23749456 | chr5:64551627-64551671                            | NM_019636:199           | Tbc1d1        | INSIDE                 | 2.251                                                        | 6.568                          | 13603.88           | 89353.73           | 14.786                         | 9241.51            | 136648.90          |
| A_68_P27921611 | chr11:74451961-74452005                           | NM_001013784:18876      | E130309D14Rik | INSIDE                 | 2.250                                                        | 5.916                          | 3541.95            | 20954.34           | 13.311                         | 2760.39            | 36744.42           |
| A_68_P22481653 | chr3:121996304-121996348                          | NR_030439:295           | Mir760        | DOWNSTREAM             | 2.249                                                        | 3.528                          | 297.41             | 1049.11            | 7.933                          | 238.92             | 1895.23            |
| A_68_P28909030 | chr13:29051600-29051644                           | NM_009238:-6071         | Sox4          | PROMOTER               | 2.248                                                        | 3.638                          | 3625.39            | 13187.66           | 8.177                          | 2539.05            | 20760.84           |
| A_68_P25761256 | chr8:33120256-33120300                            | ENSMUST00000080782:-697 |               | PROMOTER               | 2.247                                                        | 4.259                          | 4672.03            | 19896.15           | 9.570                          | 3228.37            | 30896.25           |
| A_68_P23873662 | chr5:89150059-89150103                            | NM_026735:185           | Mobkl1a       | INSIDE                 | 2.246                                                        | 6.208                          | 3024.03            | 18774.60           | 13.943                         | 2380.22            | 33186.33           |
| A_68_P23176712 | chr4:104782284-104782328                          | NM_178143:197           | Prkaa2        | INSIDE                 | 2.246                                                        | 5.210                          | 21364.40           | 111304.50          | 11.704                         | 15131.89           | 177100.10          |
| A_68_P27338390 | chr10:90291759-90291803                           | NM_001177396:252345     | Anks1b        | INSIDE                 | 2.245                                                        | 4.521                          | 1258.95            | 5692.26            | 10.151                         | 946.42             | 9607.50            |
| A_68_P29144056 | chr13:74199745-74199789                           | NM_028959:-33           | Cep72         | PROMOTER               | 2.243                                                        | 5.603                          | 3753.23            | 21030.95           | 12.567                         | 2544.14            | 31972.55           |
| A_68_P21492621 | chr2:104966817-104966861                          | NM_144783:153           | Wt1           | INSIDE                 | 2.243                                                        | 4.140                          | 9624.40            | 39847.81           | 9.288                          | 6641.61            | 61684.67           |
| A_68_P27850822 | chr11:61668093-61668137                           | NM_013881:480           | Ulk2          | INSIDE                 | 2.241                                                        | 12.017                         | 5428.39            | 65234.44           | 26.936                         | 3559.78            | 95885.15           |
| A_68_P29011797 | chr13:47218039-47218083                           | NM_146042:-28           | Rnf144b       | PROMOTER               | 2.239                                                        | 1.629                          | 928.54             | 1512.30            | 3.647                          | 772.40             | 2816.58            |
| A_68_P33007144 | chr9_random:49674-49720                           | NR_015516:-3712         | 4930526115Rik | PROMOTER               | 2.238                                                        | 20.949                         | 646.83             | 13550.10           | 46.880                         | 431.58             | 20232.68           |
| A_68_P23297034 | chr4:129190844-129190888                          | NM_010807:42            | Marcks11      | INSIDE                 | 2.238                                                        | 6.078                          | 31663.01           | 192442.20          | 13.600                         | 21299.62           | 289684.00          |
| A_68_P30337605 | chr15:74348245-74348289                           | NM_174991:1641          | Bai1          | INSIDE                 | 2.237                                                        | 5.632                          | 3019.87            | 17008.45           | 12.598                         | 1874.84            | 23618.98           |
| A_68_P32031149 | chr19:25746643-25746687                           | NM_145831:-236          | Dmrt2         | PROMOTER               | 2.234                                                        | 3.449                          | 1352.47            | 4664.11            | 7.702                          | 1112.55            | 8569.35            |
| A_68_P26221254 | chr8:123113358-123113402                          | NM_178856:-405          | Gins2         | PROMOTER               | 2.234                                                        | 8.182                          | 5236.56            | 42846.61           | 18.278                         | 3565.24            | 65164.01           |
| A_68_P23397206 | chr4:148265535-148265579                          | NM_027195:87056         | Cas21         | INSIDE                 | 2.233                                                        | 5.561                          | 2267.31            | 12607.68           | 12.418                         | 1606.26            | 19945.99           |
| A_68_P30356228 | chr15:77672759-77672803                           | NM_022410:-235          | Myh9          | PROMOTER               | 2.233                                                        | 5.791                          | 8131.65            | 47090.36           | 12.930                         | 5925.98            | 76623.80           |
| A_68_P30481633 | chr15:99501487-99501531                           | NM_009597:360           | Acen2         | INSIDE                 | 2.232                                                        | 1.473                          | 1396.71            | 2057.16            | 3.287                          | 1251.13            | 4112.21            |
| A_68_P32260247 | chrX:11654044-11654088                            | NM_029510:3613          | Bcor          | INSIDE                 | 2.232                                                        | 1.501                          | 1387.28            | 2082.41            | 3.351                          | 649.41             | 2176.05            |
| A_68_P28047527 | chr11:96777858-96777902                           | NM_030248:-85           | Cdk5rap3      | PROMOTER               | 2.231                                                        | 9.254                          | 3176.78            | 29398.85           | 20.649                         | 1753.53            | 36208.26           |
| A_68_P31147212 | chr17:32966976-32967020                           | NM_177359:195           | Zfp799        | INSIDE                 | 2.230                                                        | 7.205                          | 2501.50            | 18022.65           | 16.067                         | 1776.93            | 28549.85           |
| A_68_P28080239 | chr11:102417477-102417521                         | NM_001159492:-26        | Gpatch8       | PROMOTER               | 2.229                                                        | 6.312                          | 7420.54            | 46836.99           | 14.069                         | 5185.46            | 72952.94           |
| A_68_P32506209 | chrX:82819101-82819145                            | NM_025729:-238          | Tab3          | PROMOTER               | 2.228                                                        | 5.900                          | 2141.79            | 12636.44           | 13.145                         | 1254.89            | 16495.16           |
| A_68_P28053229 | chr11:97745535-97745579                           | NM_001081435:-88        | Fbxo47        | PROMOTER               | 2.226                                                        | 7.628                          | 7635.22            | 58240.73           | 16.982                         | 4804.99            | 81599.95           |
| A_68_P25279941 | chr7:90014673-90014717                            | NM_175366:-1148         | Mex3b         | PROMOTER               | 2.224                                                        | 5.070                          | 4959.03            | 25142.20           | 11.274                         | 3753.77            | 42319.18           |
| A_68_P32583453 | chrX:103415136-103415180                          | NM_001001176:23         | Taf9b         | INSIDE                 | 2.223                                                        | 6.738                          | 958.05             | 6455.48            | 14.979                         | 638.42             | 9563.02            |
| A_68_P26017904 | chr8:86591013-86591057                            | NM_009055:300           | Rfx1          | INSIDE                 | 2.220                                                        | 4.457                          | 1742.64            | 7766.47            | 9.895                          | 1449.24            | 14340.14           |
| A_68_P26247734 | chr8:127317918-127317962                          | NM_198632:1022          | Trim67        | INSIDE                 | 2.219                                                        | 5.090                          | 4707.86            | 23962.96           | 11.297                         | 3622.37            | 40921.94           |
| A_68_P23693365 | chr5:52581836-52581880                            | NR_015537:-61           | 9230114K14Rik | DIVERGENT_PROMOTER     | 2.218                                                        | 6.219                          | 1084.17            | 6742.91            | 13.793                         | 995.51             | 13731.22           |
| A_68_P28575798 | chr12:81564728-81564772                           | NM_133798:671           | Exd2          | INSIDE                 | 2.218                                                        | 7.448                          | 1524.74            | 11356.43           | 16.524                         | 1070.78            | 17693.19           |
| A_68_P31158869 | chr17:35457566-35457610                           | NM_010390:86            | H2-Q1         | INSIDE                 | 2.218                                                        | 3.214                          | 2869.99            | 9224.70            | 7.128                          | 2234.57            | 15927.74           |
| A_68_P32265730 | chrX:12858920-12858964                            | NM_010028:795           | Ddx3x         | INSIDE                 | 2.217                                                        | 1.889                          | 385.98             | 729.24             | 4.188                          | 219.21             | 918.16             |
| A_68_P23513990 | chr5:18732536-18732580                            | NM_001170746:-305       | Magi2         | PROMOTER               | 2.216                                                        | 6.205                          | 10538.73           | 65397.65           | 13.752                         | 8258.67            | 113576.80          |

| ProbeName      | Target position of probe on CpG island microarray | TargetID               | GeneSymbol    | CpG island Description | Ratio of relative methylation (TiO <sub>2</sub> -NP/Vehicle) | Sham group                     |                    |                    | TiO <sub>2</sub> -H group      |                    |                    |
|----------------|---------------------------------------------------|------------------------|---------------|------------------------|--------------------------------------------------------------|--------------------------------|--------------------|--------------------|--------------------------------|--------------------|--------------------|
|                |                                                   |                        |               |                        |                                                              | Relative methylation (Cy5/Cy3) | Cy3 signal (Input) | Cy5 signal (MeDIP) | Relative methylation (Cy5/Cy3) | Cy3 signal (Input) | Cy5 signal (MeDIP) |
| A_68_P32700325 | chrX:137200051-137200095                          | ENSMUST00000112988:462 |               | INSIDE                 | 2.216                                                        | 6.332                          | 1007.94            | 6382.27            | 14.033                         | 816.09             | 11452.23           |
| A_68_P20645803 | chr1:138311898-138311942                          | NM_026500:73           | Ddx59         | INSIDE                 | 2.215                                                        | 2.243                          | 339.36             | 761.23             | 4.969                          | 308.46             | 1532.86            |
| A_68_P27901829 | chr11:70460462-70460506                           | NM_024211:11           | Ste25a11      | INSIDE                 | 2.215                                                        | 1.633                          | 1156.52            | 1888.88            | 3.617                          | 951.49             | 3441.89            |
| A_68_P25091867 | chr7:52471545-52471589                            | NM_011565:444          | Tead2         | INSIDE                 | 2.215                                                        | 15.992                         | 4898.00            | 78330.04           | 35.420                         | 3007.66            | 106531.60          |
| A_68_P31619415 | chr18:35812025-35812069                           | NM_027222:-3025        | 2010001M09Rik | PROMOTER               | 2.214                                                        | 6.357                          | 1547.49            | 9837.17            | 14.072                         | 1207.65            | 16994.20           |
| A_68_P21103096 | chr2:30271133-30271177                            | NM_007760:114          | Crat          | INSIDE                 | 2.214                                                        | 7.925                          | 3581.49            | 28381.88           | 17.546                         | 2493.99            | 43759.89           |
| A_68_P33007796 | chr4_random:129068-129112                         | NM_001033326:19289     | Dhrsx         | INSIDE                 | 2.214                                                        | 6.689                          | 9324.57            | 62374.43           | 14.813                         | 5853.14            | 86702.44           |
| A_68_P23592057 | chr5:34343782-34343826                            | NM_001001985:5172      | Nat81         | INSIDE                 | 2.214                                                        | 8.208                          | 19505.54           | 160108.10          | 18.177                         | 11137.08           | 202440.10          |
| A_68_P24920738 | chr6:144997199-144997243                          | NM_001024468:112       | Beat1         | INSIDE                 | 2.213                                                        | 2.887                          | 1538.27            | 4441.50            | 6.390                          | 1136.41            | 7261.59            |
| A_68_P22861615 | chr4:41261631-41261675                            | NM_026893:282          | Dcaf12        | INSIDE                 | 2.213                                                        | 9.114                          | 4804.62            | 43790.81           | 20.168                         | 3504.05            | 70669.71           |
| A_68_P27943494 | chr11:78279579-78279623                           | NM_026740:398          | Ste46a1       | INSIDE                 | 2.212                                                        | 5.310                          | 7800.47            | 41419.02           | 11.745                         | 5159.24            | 60594.41           |
| A_68_P31093720 | chr17:23940883-23940927                           | NM_175229:751          | Srrm2         | INSIDE                 | 2.212                                                        | 2.483                          | 1982.45            | 4923.18            | 5.494                          | 1454.97            | 7994.04            |
| A_68_P20742449 | chr1:158233625-158233669                          | NM_001134741:-167      | Tdrd5         | DIVERGENT_PROMOTER     | 2.212                                                        | 9.538                          | 2976.99            | 28395.71           | 21.102                         | 2346.43            | 49515.32           |
| A_68_P25360757 | chr7:106417697-106417741                          | NM_001043355:863       | Mtap6         | INSIDE                 | 2.210                                                        | 4.630                          | 2563.91            | 11870.65           | 10.232                         | 1820.63            | 18628.00           |
| A_68_P22737302 | chr4:12833974-12834018                            | NM_001171801:13        | Gm11818       | INSIDE                 | 2.209                                                        | 5.015                          | 1959.85            | 9827.78            | 11.076                         | 1368.52            | 15158.08           |
| A_68_P28751776 | chr12:113916958-113917002                         | NM_001100460:-70       | Zbtb42        | DIVERGENT_PROMOTER     | 2.209                                                        | 2.980                          | 806.11             | 2402.03            | 6.582                          | 700.69             | 4611.84            |
| A_68_P29080348 | chr13:59686650-59686694                           | NM_030153:-21          | Naa35         | PROMOTER               | 2.207                                                        | 6.748                          | 1745.08            | 11775.43           | 14.893                         | 1380.05            | 20552.67           |
| A_68_P31951139 | chr19:10599956-10600000                           | NM_001164272:245       | Cpsf7         | INSIDE                 | 2.206                                                        | 15.169                         | 6442.48            | 97726.43           | 33.464                         | 3939.70            | 131838.40          |
| A_68_P20337461 | chr1:72582629-72582673                            | NM_001045533:488       | Marchf4       | INSIDE                 | 2.205                                                        | 8.769                          | 4635.05            | 40642.45           | 19.337                         | 3125.23            | 60432.55           |
| A_68_P20335713 | chr1:72290528-72290572                            | ENSMUST00000123654:-44 |               | PROMOTER               | 2.205                                                        | 3.019                          | 1186.36            | 3581.85            | 6.658                          | 844.95             | 5625.61            |
| A_68_P24591289 | chr6:83027770-83027814                            | NM_197992:-591         | Pcgfl1        | DIVERGENT_PROMOTER     | 2.204                                                        | 2.692                          | 354.10             | 953.35             | 5.934                          | 302.72             | 1796.48            |
| A_68_P28606270 | chr12:87166109-87166153                           | NM_001081423:231       | Till5         | INSIDE                 | 2.203                                                        | 1.934                          | 783.80             | 1515.98            | 4.262                          | 601.72             | 2564.47            |
| A_68_P28712200 | chr12:107200958-107201002                         | BC156654:163120        |               | INSIDE                 | 2.203                                                        | 8.056                          | 7461.56            | 60109.60           | 17.745                         | 5395.10            | 95735.46           |
| A_68_P27279294 | chr10:79318023-79318067                           | NR_029447:-328         | E130317F20Rik | PROMOTER               | 2.202                                                        | 5.706                          | 1545.56            | 8818.27            | 12.562                         | 1521.69            | 15271.43           |
| A_68_P26169432 | chr8:114167808-114167852                          | NM_001037665:488       | Zfp1          | INSIDE                 | 2.202                                                        | 5.107                          | 2651.81            | 13541.72           | 11.244                         | 1977.35            | 22233.90           |
| A_68_P24603559 | chr6:85137815-85137859                            | NM_010131:-88          | Emx1          | PROMOTER               | 2.198                                                        | 6.948                          | 2502.06            | 17385.39           | 15.275                         | 1965.77            | 30027.50           |
| A_68_P25032021 | chr7:31320496-31320540                            | NM_178252:-490         | Arhgap33      | PROMOTER               | 2.197                                                        | 5.889                          | 4112.22            | 24218.15           | 12.937                         | 2604.63            | 33696.82           |
| A_68_P27503761 | chr10:120913745-120913792                         | NM_138956:-462         | Rassf3        | PROMOTER               | 2.197                                                        | 2.114                          | 470.03             | 993.45             | 4.644                          | 376.06             | 1746.53            |
| A_68_P26398844 | chr9:30939486-30939530                            | NM_011176:-124         | Stt4          | PROMOTER               | 2.197                                                        | 4.125                          | 7544.95            | 31124.72           | 9.064                          | 5133.42            | 46531.13           |
| A_68_P30960416 | chr16:91010827-91010871                           | NM_001045515:492       | Synj1         | INSIDE                 | 2.196                                                        | 7.714                          | 957.87             | 7388.76            | 16.937                         | 792.63             | 13424.86           |
| A_68_P31306319 | chr17:66798578-66798622                           | NM_001114098:490       | 1110012J17Rik | INSIDE                 | 2.195                                                        | 10.809                         | 9897.40            | 106984.90          | 23.727                         | 6523.10            | 154776.90          |
| A_68_P31143302 | chr17:32173587-32173631                           | NM_028244:502          | Rrp1b         | INSIDE                 | 2.195                                                        | 6.110                          | 3200.19            | 19554.71           | 13.412                         | 2348.29            | 31494.87           |
| A_68_P25505623 | chr7:134587980-134588024                          | NM_175163:4670         | Zfp689        | INSIDE                 | 2.195                                                        | 6.386                          | 1233.58            | 7878.17            | 14.018                         | 1140.67            | 15989.94           |
| A_68_P30478229 | chr15:98928779-98928823                           | NM_176835:-1114        | Dnajc22       | PROMOTER               | 2.194                                                        | 8.321                          | 7380.07            | 61409.06           | 18.254                         | 5468.03            | 99815.07           |
| A_68_P28067852 | chr11:100258833-100258877                         | NM_010593:250          | Jup           | INSIDE                 | 2.193                                                        | 5.577                          | 3327.06            | 18556.04           | 12.233                         | 2328.22            | 28480.36           |
| A_68_P25716360 | chr8:24521956-24522000                            | NM_013834:5            | Sfrp1         | INSIDE                 | 2.193                                                        | 9.499                          | 2326.53            | 22099.39           | 20.830                         | 1818.84            | 37887.13           |
| A_68_P30668269 | A_68_P30668269                                    |                        |               | Unknown                | 2.193                                                        | 10.012                         | 1958.33            | 19606.21           | 21.951                         | 1317.28            | 28916.10           |
| A_68_P32672214 | chrX:131010586-131010630                          | NM_028958:421          | Taf7l         | INSIDE                 | 2.192                                                        | 4.631                          | 1820.18            | 8429.86            | 10.151                         | 797.38             | 8094.39            |
| A_68_P20303908 | chr1:66724124-66724168                            | NM_175510:209126       | Unc80         | INSIDE                 | 2.192                                                        | 12.767                         | 15968.88           | 203869.80          | 27.990                         | 10327.29           | 289058.50          |
| A_68_P29578138 | chr14:47380037-47380081                           | NM_028222:-157         | Cdkn3         | PROMOTER               | 2.191                                                        | 1.390                          | 1576.79            | 2191.73            | 3.046                          | 1182.31            | 3601.48            |
| A_68_P32226993 | chr19:60831736-60831780                           | NM_178421:-131         | Nanos1        | PROMOTER               | 2.190                                                        | 5.397                          | 11809.73           | 63740.95           | 11.823                         | 8903.57            | 105264.20          |
| A_68_P31784091 | chr18:66094837-66094881                           | NM_013833:3885         | Rax           | INSIDE                 | 2.190                                                        | 7.709                          | 3926.57            | 30268.81           | 16.880                         | 2989.95            | 50470.21           |
| A_68_P28595531 | chr12:85291747-85291791                           | NM_023633:211          | 2410016O06Rik | INSIDE                 | 2.188                                                        | 2.421                          | 371.70             | 899.87             | 5.298                          | 458.78             | 2430.71            |
| A_68_P27681337 | chr11:30854282-30854326                           | NM_023906:-93          | Asb3          | DIVERGENT_PROMOTER     | 2.186                                                        | 6.686                          | 9808.72            | 65585.14           | 14.615                         | 7228.55            | 105644.30          |
| A_68_P23057175 | chr4:82151052-82151103                            | NM_001113209:135       | Nfib          | INSIDE                 | 2.186                                                        | 12.701                         | 2331.78            | 29615.98           | 27.759                         | 1593.57            | 44235.74           |
| A_68_P22336399 | chr3:93248419-93248463                            | NM_001163098:2189      | Tehh          | INSIDE                 | 2.183                                                        | 41.121                         | 2242.23            | 92201.51           | 89.767                         | 1225.81            | 110037.50          |
| A_68_P29614877 | chr14:55513260-55513304                           | NM_019402:303          | Pabpn1        | INSIDE                 | 2.182                                                        | 9.221                          | 2638.58            | 24330.46           | 20.124                         | 1966.61            | 39576.81           |
| A_68_P27804178 | chr11:53138130-53138174                           | NM_026479:-38          | Zecch10       | PROMOTER               | 2.182                                                        | 3.232                          | 3439.26            | 11114.35           | 7.051                          | 2390.08            | 16853.17           |
| A_68_P24134134 | chr5:139677035-139677079                          | NM_024451:433          | Sun1          | INSIDE                 | 2.181                                                        | 5.783                          | 2783.77            | 16099.74           | 12.615                         | 1839.83            | 23209.33           |
| A_68_P24327113 | chr6:29477125-29477169                            | NM_012057:414          | Irf5          | INSIDE                 | 2.180                                                        | 6.727                          | 2168.97            | 14589.91           | 14.666                         | 1359.43            | 19936.89           |
| A_68_P25056449 | chr7:37481732-37481776                            | NM_172298:-1382        | Tshz3         | PROMOTER               | 2.179                                                        | 4.522                          | 6942.59            | 31394.05           | 9.853                          | 5384.81            | 53058.30           |



| ProbeName      | Target position of probe on CpG island microarray | TargetID                | GeneSymbol    | CpG island Description | Ratio of relative methylation (TiO <sub>2</sub> -NP/Vehicle) | Sham group                     |                    |                    | TiO <sub>2</sub> -H group      |                    |                    |
|----------------|---------------------------------------------------|-------------------------|---------------|------------------------|--------------------------------------------------------------|--------------------------------|--------------------|--------------------|--------------------------------|--------------------|--------------------|
|                |                                                   |                         |               |                        |                                                              | Relative methylation (Cy5/Cy3) | Cy3 signal (Input) | Cy5 signal (MeDIP) | Relative methylation (Cy5/Cy3) | Cy3 signal (Input) | Cy5 signal (MeDIP) |
| A_68_P28752833 | chr12:114067608-114067652                         | NM_028023:-30           | Cdca4         | PROMOTER               | 2.176                                                        | 4.177                          | 2559.35            | 10690.00           | 9.089                          | 1848.78            | 16804.37           |
| A_68_P22422570 | chr3:109945667-109945711                          | NM_001163348:702        | Ntng1         | INSIDE                 | 2.176                                                        | 1.821                          | 2038.86            | 3713.60            | 3.963                          | 1614.34            | 6397.87            |
| A_68_P27290790 | chr10:81063642-81063689                           | NM_053254:-20           | Tle6          | DIVERGENT_PROMOTER     | 2.176                                                        | 4.811                          | 8247.25            | 39678.77           | 10.468                         | 6013.28            | 62949.87           |
| A_68_P31922938 | chr19:4397627-4397671                             | NM_001001984:-571       | Kdm2a         | PROMOTER               | 2.175                                                        | 3.087                          | 1795.80            | 5543.40            | 6.715                          | 1491.27            | 10014.01           |
| A_68_P21780563 | chr2:157854132-157854176                          | NM_027434:-375          | Rprdlb        | PROMOTER               | 2.174                                                        | 3.021                          | 1078.36            | 3258.04            | 6.568                          | 867.01             | 5694.82            |
| A_68_P32099202 | chr19:38129262-38129306                           | NM_028293:-230          | Cep55         | PROMOTER               | 2.173                                                        | 8.598                          | 14671.61           | 126142.50          | 18.683                         | 9111.35            | 170231.80          |
| A_68_P28048173 | chr11:96879906-96879950                           | NM_031183:5046          | Sp6           | INSIDE                 | 2.171                                                        | 8.587                          | 6504.89            | 55854.27           | 18.644                         | 4870.51            | 90804.01           |
| A_68_P32242174 | chrX:7769836-7769880                              | NM_007898:780           | Ebp           | INSIDE                 | 2.170                                                        | 1.795                          | 3484.43            | 6255.21            | 3.896                          | 1401.56            | 5460.34            |
| A_68_P29615096 | chr14:55545666-55545710                           | NM_010112:-63           | Efs           | DIVERGENT_PROMOTER     | 2.169                                                        | 18.040                         | 3597.05            | 64890.58           | 39.131                         | 2404.11            | 94075.39           |
| A_68_P23344531 | chr4:137772915-137772959                          | NM_001122897:-109       | Hp1bp3        | PROMOTER               | 2.169                                                        | 16.862                         | 7205.96            | 121509.40          | 36.582                         | 4534.79            | 165892.40          |
| A_68_P22894261 | chr4:47365847-47365891                            | NM_009370:-308          | Tgfbr1        | PROMOTER               | 2.169                                                        | 5.306                          | 1036.17            | 5498.30            | 11.508                         | 847.24             | 9749.72            |
| A_68_P21587592 | chr2:122528587-122528631                          | NM_011774:-209          | Sle30a4       | PROMOTER               | 2.167                                                        | 4.479                          | 2103.53            | 9422.12            | 9.705                          | 1687.24            | 16374.21           |
| A_68_P32742983 | chrX:147247480-147247524                          | NM_001199246:744        | Maged2        | INSIDE                 | 2.161                                                        | 4.903                          | 2403.16            | 11783.38           | 10.596                         | 1585.60            | 16800.76           |
| A_68_P21204319 | chr2:49643540-49643584                            | NM_027990:357           | Lypd6b        | INSIDE                 | 2.160                                                        | 4.204                          | 1901.65            | 7994.55            | 9.081                          | 1433.64            | 13018.78           |
| A_68_P25266551 | chr7:87547096-87547140                            | NM_011046:530           | Furin         | INSIDE                 | 2.159                                                        | 12.930                         | 2107.76            | 27252.24           | 27.910                         | 1267.94            | 35387.98           |
| A_68_P20556970 | chr1:121318089-121318133                          | NM_008381:715           | Inhbb         | INSIDE                 | 2.159                                                        | 5.335                          | 1743.08            | 9299.56            | 11.520                         | 1393.23            | 16015.89           |
| A_68_P27846103 | chr11:60835840-60835884                           | ENSMUST00000089184:-203 |               | PROMOTER               | 2.159                                                        | 4.342                          | 8041.17            | 34914.08           | 9.374                          | 6184.87            | 57977.20           |
| A_68_P24624506 | chr6:88791877-88791921                            | NM_030251:31            | Abtb1         | INSIDE                 | 2.158                                                        | 5.442                          | 15857.65           | 86291.89           | 11.741                         | 10489.90           | 123163.10          |
| A_68_P28175309 | chr11:118884826-118884870                         | NM_007623:506           | Cbx2          | INSIDE                 | 2.158                                                        | 2.545                          | 1722.26            | 4382.75            | 5.492                          | 1449.00            | 7957.76            |
| A_68_P31114505 | chr17:27270655-27270699                           | NM_026063:160           | 2900010M23Rik | INSIDE                 | 2.157                                                        | 9.667                          | 6284.28            | 60751.19           | 20.850                         | 4279.05            | 89217.88           |
| A_68_P27537125 | chr10:127058908-127058952                         | NM_008512:-726          | Lrp1          | PROMOTER               | 2.156                                                        | 5.585                          | 2639.93            | 14743.96           | 12.043                         | 1960.62            | 23611.85           |
| A_68_P21722283 | chr2:146909704-146909748                          | NM_023504:1355          | Nkx2-4        | INSIDE                 | 2.154                                                        | 8.276                          | 3101.29            | 25666.94           | 17.826                         | 2213.60            | 39460.62           |
| A_68_P27332821 | chr10:89207726-89207770                           | NM_029166:13            | Uhrf1bp11     | INSIDE                 | 2.154                                                        | 3.424                          | 2654.20            | 9088.83            | 7.375                          | 2280.54            | 16819.81           |
| A_68_P28873012 | chr13:21560534-21560582                           | NM_025719:-188          | Nkap1         | PROMOTER               | 2.153                                                        | 4.725                          | 1181.67            | 5583.63            | 10.174                         | 928.73             | 9449.34            |
| A_68_P21250388 | chr2:58999667-58999711                            | NM_026361:782           | Pkp4          | INSIDE                 | 2.153                                                        | 7.303                          | 2391.43            | 17465.64           | 15.726                         | 1956.02            | 30760.24           |
| A_68_P21103442 | chr2:30328841-30328885                            | NM_030244:857           | Ier5l         | INSIDE                 | 2.152                                                        | 11.581                         | 3520.79            | 40775.03           | 24.925                         | 2959.60            | 73769.32           |
| A_68_P31731070 | chr18:56721947-56721991                           | NM_138600:-16           | Aldh7a1       | DIVERGENT_PROMOTER     | 2.150                                                        | 8.615                          | 28263.35           | 243484.30          | 18.524                         | 18196.29           | 337068.80          |
| A_68_P30625227 | chr16:27388952-27388996                           | NM_001025615:-88        | Ccdc50        | PROMOTER               | 2.147                                                        | 4.727                          | 892.50             | 4218.57            | 10.148                         | 820.82             | 8329.36            |
| A_68_P32463053 | chrX:70748921-70748965                            | NM_177236:518           | Atp2b3        | INSIDE                 | 2.146                                                        | 1.750                          | 5188.54            | 9081.27            | 3.756                          | 2355.67            | 8846.92            |
| A_68_P32383369 | chrX:49967083-49967127                            | NM_016697:47            | Gpc3          | INSIDE                 | 2.146                                                        | 3.528                          | 4704.13            | 16596.20           | 7.570                          | 2240.78            | 16963.39           |
| A_68_P23931499 | chr5:101227260-101227304                          | NM_001081107:337        | Helq          | INSIDE                 | 2.145                                                        | 2.896                          | 2065.63            | 5982.98            | 6.212                          | 1669.15            | 10368.86           |
| A_68_P31420283 | chr17:87362407-87362451                           | NM_145491:-22           | Rhoq          | PROMOTER               | 2.143                                                        | 2.059                          | 433.01             | 891.59             | 4.412                          | 401.47             | 1771.37            |
| A_68_P25174406 | chr7:71083847-71083891                            | NM_021366:-67           | Klfl3         | PROMOTER               | 2.142                                                        | 5.907                          | 1489.42            | 8798.10            | 12.651                         | 1164.39            | 14731.24           |
| A_68_P31020947 | chr17:6079672-6079716                             | NM_001111017:45         | Serac1        | INSIDE                 | 2.142                                                        | 2.556                          | 2521.73            | 6444.82            | 5.475                          | 1977.12            | 10824.66           |
| A_68_P30580079 | chr16:18499124-18499168                           | NM_023120:183           | Gnb11         | INSIDE                 | 2.141                                                        | 2.844                          | 1859.81            | 5289.01            | 6.089                          | 1442.04            | 8781.04            |
| A_68_P22752524 | chr4:15885248-15885292                            | NM_013752:157           | Nbn           | INSIDE                 | 2.141                                                        | 2.779                          | 1457.00            | 4048.50            | 5.948                          | 1231.65            | 7325.64            |
| A_68_P24116580 | chr5:135964648-135964692                          | NM_146001:56322         | Hip1          | INSIDE                 | 2.140                                                        | 5.409                          | 3084.15            | 16682.53           | 11.576                         | 2262.33            | 26188.17           |
| A_68_P23232782 | chr4:116828713-116828757                          | NR_030704:-281          | Snord55       | PROMOTER               | 2.140                                                        | 3.084                          | 637.06             | 1964.47            | 6.599                          | 492.18             | 3247.96            |
| A_68_P31116177 | chr17:27552104-27552148                           | NM_001013385:88123      | Grm4          | DOWNSTREAM             | 2.139                                                        | 12.359                         | 2346.81            | 29005.04           | 26.430                         | 1264.59            | 33423.64           |
| A_68_P27776272 | chr11:47802609-47802653                           | ENSMUST0000128558:-159  |               | PROMOTER               | 2.139                                                        | 4.332                          | 1174.70            | 5089.32            | 9.265                          | 917.71             | 8502.75            |
| A_68_P26710370 | chr9:88377975-88378019                            | NM_019796:-761          | Syncrip       | PROMOTER               | 2.138                                                        | 5.150                          | 1514.87            | 7801.64            | 11.009                         | 1191.15            | 13113.61           |
| A_68_P26405232 | chr9:32217116-32217162                            | AK146406:436717         |               | INSIDE                 | 2.138                                                        | 3.197                          | 3016.19            | 9643.67            | 6.836                          | 2325.43            | 15897.00           |
| A_68_P28175799 | chr11:118951917-118951961                         | NM_007625:-4387         | Cbx4          | PROMOTER               | 2.137                                                        | 5.608                          | 3193.53            | 17908.29           | 11.981                         | 2453.76            | 29398.49           |
| A_68_P22202889 | chr3:65762508-65762552                            | NM_019937:-383          | Cen11         | PROMOTER               | 2.137                                                        | 1.533                          | 854.67             | 1310.43            | 3.276                          | 727.96             | 2384.86            |
| A_68_P27448186 | chr10:110735503-110735547                         | NM_027914:-210          | Bbs10         | PROMOTER               | 2.136                                                        | 4.699                          | 6265.44            | 29444.31           | 10.038                         | 4580.95            | 45985.56           |
| A_68_P24046831 | chr5:122293021-122293065                          | NM_175474:-5994         | Fam109a       | DIVERGENT_PROMOTER     | 2.136                                                        | 2.255                          | 193.72             | 436.93             | 4.817                          | 167.27             | 805.78             |
| A_68_P23164325 | chr4:102787321-102787365                          | NM_001039081:-4652      | Mier1         | PROMOTER               | 2.136                                                        | 7.582                          | 18637.64           | 141316.60          | 16.193                         | 13089.85           | 211962.50          |
| A_68_P30959119 | chr16:90810476-90810520                           | NM_029497:160           | Urb1          | INSIDE                 | 2.136                                                        | 3.049                          | 1905.85            | 5811.50            | 6.515                          | 1616.24            | 10529.11           |
| A_68_P23260191 | chr4:122672828-122672872                          | NM_008506:-491          | Mycl1         | PROMOTER               | 2.135                                                        | 12.888                         | 3988.63            | 51404.12           | 27.511                         | 2697.48            | 74210.26           |
| A_68_P24535485 | chr6:71222087-71222131                            | NM_145568:96            | Krcc1         | INSIDE                 | 2.134                                                        | 11.063                         | 1731.55            | 19155.50           | 23.604                         | 1167.46            | 27557.14           |
| A_68_P20457529 | chr1:95700443-95700487                            | NM_025454:-77           | Ing5          | DIVERGENT_PROMOTER     | 2.133                                                        | 9.915                          | 5255.68            | 52111.82           | 21.145                         | 2649.65            | 56025.88           |

| ProbeName      | Target position of probe on CpG island microarray | TargetID                 | GeneSymbol | CpG island Description | Ratio of relative methylation (TiO <sub>2</sub> -NP/Vehicle) | Sham group                     |                    |                    | TiO <sub>2</sub> -H group      |                    |                    |
|----------------|---------------------------------------------------|--------------------------|------------|------------------------|--------------------------------------------------------------|--------------------------------|--------------------|--------------------|--------------------------------|--------------------|--------------------|
|                |                                                   |                          |            |                        |                                                              | Relative methylation (Cy5/Cy3) | Cy3 signal (Input) | Cy5 signal (MeDIP) | Relative methylation (Cy5/Cy3) | Cy3 signal (Input) | Cy5 signal (MeDIP) |
| A_68_P29075350 | chr13:58908196-58908240                           | NM_001025074:-975        | Nrk2       | PROMOTER               | 2.133                                                        | 15.813                         | 9970.56            | 157660.40          | 33.725                         | 6282.78            | 211887.50          |
| A_68_P29237599 | chr13:95653816-95653860                           | NM_011021:8257           | Otp        | DOWNSTREAM             | 2.133                                                        | 2.276                          | 7639.08            | 17383.48           | 4.854                          | 5327.65            | 25861.44           |
| A_68_P26138122 | chr8:108692733-108692777                          | NM_178798:-20            | Slc7a6     | PROMOTER               | 2.133                                                        | 9.459                          | 3267.93            | 30911.10           | 20.172                         | 2009.26            | 40530.44           |
| A_68_P32168785 | chr19:50752526-50752570                           | NM_021377:554            | Sorcs1     | INSIDE                 | 2.133                                                        | 7.067                          | 4953.93            | 35007.53           | 15.071                         | 3490.88            | 52610.12           |
| A_68_P32026831 | chr19:25036147-25036191                           | NM_146097:-62            | Cbwd1      | PROMOTER               | 2.132                                                        | 6.201                          | 3613.13            | 22406.37           | 13.219                         | 2745.31            | 36290.47           |
| A_68_P24783935 | chr6:117857266-117857310                          | NM_001166428:-533        | Hnmpf      | PROMOTER               | 2.132                                                        | 4.289                          | 3396.15            | 14566.89           | 9.143                          | 2523.63            | 23072.58           |
| A_68_P26221734 | chr8:123191897-123191941                          | NM_010926:94             | Cox4nb     | INSIDE                 | 2.130                                                        | 2.268                          | 6911.12            | 15675.39           | 4.830                          | 4809.16            | 23230.14           |
| A_68_P31866342 | chr18:80909356-80909400                           | NM_001164111:-4466       | Nfatc1     | PROMOTER               | 2.130                                                        | 3.279                          | 1050.27            | 3443.57            | 6.983                          | 910.41             | 6357.55            |
| A_68_P27289987 | chr10:80945075-80945119                           | NM_176954:358            | Celf5      | INSIDE                 | 2.128                                                        | 8.817                          | 8860.98            | 78128.69           | 18.767                         | 4829.56            | 90637.92           |
| A_68_P25850572 | chr8:49928690-49928734                            | AK013771:-216            |            | PROMOTER               | 2.127                                                        | 7.939                          | 5676.85            | 45068.92           | 16.886                         | 4392.61            | 74172.80           |
| A_68_P32533270 | chrX:90542781-90542825                            | NM_007492:10818          | Arx        | INSIDE                 | 2.126                                                        | 3.577                          | 832.85             | 2978.70            | 7.604                          | 439.74             | 3344.00            |
| A_68_P25009418 | chr7:26067028-26067072                            | NM_001110131:-147        | Cic        | PROMOTER               | 2.126                                                        | 4.923                          | 27867.04           | 137201.80          | 10.469                         | 18156.34           | 190086.60          |
| A_68_P28153958 | chr11:115374907-115374951                         | NM_008258:756            | Hn1        | INSIDE                 | 2.126                                                        | 17.486                         | 989.68             | 17305.50           | 37.177                         | 683.54             | 25411.86           |
| A_68_P27561184 | chr11:4965305-4965349                             | NM_001190406:4           | Gas2l1     | INSIDE                 | 2.125                                                        | 7.670                          | 8270.87            | 63438.54           | 16.302                         | 5486.54            | 89440.16           |
| A_68_P32573188 | chrX:100689079-100689123                          | NR_015508:186            | Enox       | INSIDE                 | 2.124                                                        | 3.962                          | 3243.02            | 12847.80           | 8.416                          | 2143.69            | 18040.59           |
| A_68_P28470083 | chr12:60168415-60168459                           | NM_008891:531            | Pnn        | INSIDE                 | 2.123                                                        | 1.820                          | 544.02             | 990.33             | 3.864                          | 511.63             | 1976.88            |
| A_68_P27693355 | chr11:33102836-33102880                           | NM_019916:730            | Tlx3       | INSIDE                 | 2.123                                                        | 3.391                          | 1478.25            | 5012.70            | 7.199                          | 1172.83            | 8443.77            |
| A_68_P30747800 | chr16:49855504-49855548                           | NM_010581:-240           | Cd47       | PROMOTER               | 2.122                                                        | 2.349                          | 1331.03            | 3126.76            | 4.984                          | 933.56             | 4653.28            |
| A_68_P22032039 | chr3:31048745-31048789                            | NM_008770:-75            | Cldn11     | PROMOTER               | 2.122                                                        | 1.605                          | 1227.26            | 1969.46            | 3.405                          | 969.49             | 3301.02            |
| A_68_P25098823 | chr7:53653169-53653213                            | NM_001112739:1324        | Kenc1      | INSIDE                 | 2.122                                                        | 1.801                          | 902.15             | 1624.83            | 3.822                          | 1053.18            | 4025.32            |
| A_68_P29055349 | chr13:55589582-55589626                           | NM_001177371:-167        | Dbn1       | PROMOTER               | 2.120                                                        | 8.125                          | 3720.33            | 30227.89           | 17.225                         | 2832.48            | 48789.15           |
| A_68_P29726978 | chr14:75684076-75684120                           | NM_026083:-81            | Zc3h13     | PROMOTER               | 2.120                                                        | 8.539                          | 2031.43            | 17345.71           | 18.101                         | 1558.55            | 28211.02           |
| A_68_P27939273 | chr11:77580346-77580390                           | ENSMUST00000102488:-5284 |            | PROMOTER               | 2.119                                                        | 6.643                          | 2128.84            | 14141.13           | 14.075                         | 1689.26            | 23776.24           |
| A_68_P26866698 | chr9:118416014-118416060                          | NM_018748:601            | Golga4     | INSIDE                 | 2.118                                                        | 11.798                         | 3642.19            | 42970.34           | 24.992                         | 2297.60            | 57421.75           |
| A_68_P28977626 | chr13:41454570-41454617                           | NM_017464:-223           | Nedd9      | PROMOTER               | 2.118                                                        | 8.738                          | 800.33             | 6993.42            | 18.504                         | 665.69             | 12317.74           |
| A_68_P20148714 | chr1:36568619-36568663                            | NM_001039551:-80         | Cnmn3      | PROMOTER               | 2.117                                                        | 8.917                          | 14587.91           | 130076.10          | 18.878                         | 10155.26           | 191711.20          |
| A_68_P24295432 | chr6:23203617-23203661                            | NM_028462:-5374          | Fezf1      | PROMOTER               | 2.117                                                        | 4.889                          | 2303.60            | 11263.08           | 10.350                         | 1828.01            | 18919.61           |
| A_68_P24477003 | chr6:56781975-56782019                            | NM_012056:-56            | Fkbp9      | PROMOTER               | 2.117                                                        | 2.955                          | 752.71             | 2224.52            | 6.256                          | 588.64             | 3682.38            |
| A_68_P25343512 | chr7:103359060-103359104                          | NM_011858:-64            | Odz4       | PROMOTER               | 2.117                                                        | 11.052                         | 2664.60            | 29448.01           | 23.391                         | 2126.61            | 49742.89           |
| A_68_P25354353 | chr7:105326510-105326554                          | NM_007602:171            | Capn5      | INSIDE                 | 2.116                                                        | 4.262                          | 3205.06            | 13658.50           | 9.017                          | 2370.02            | 21370.70           |
| A_68_P25274817 | chr7:89079514-89079558                            | NM_013886:-191           | Hdgfrp3    | PROMOTER               | 2.116                                                        | 6.283                          | 3031.88            | 19048.71           | 13.295                         | 2230.02            | 29648.19           |
| A_68_P24697529 | chr6:101327967-101328012                          | NM_018884:-98            | Pdzrn3     | PROMOTER               | 2.116                                                        | 3.642                          | 1129.20            | 4112.31            | 7.704                          | 922.39             | 7106.53            |
| A_68_P20354818 | chr1:75543316-75543360                            | NM_009208:498            | Slc4a3     | INSIDE                 | 2.116                                                        | 4.675                          | 6516.45            | 30464.92           | 9.891                          | 4369.35            | 43216.35           |
| A_68_P23154908 | chr4:101093069-101093113                          | NM_009647:783            | Ak4        | INSIDE                 | 2.114                                                        | 2.054                          | 374.05             | 768.22             | 4.343                          | 300.11             | 1303.25            |
| A_68_P31428328 | chr17:88929429-88929473                           | NM_028658:-13            | Klraql1    | PROMOTER               | 2.114                                                        | 6.174                          | 817.38             | 5046.29            | 13.049                         | 621.87             | 8114.53            |
| A_68_P27995861 | chr11:87550950-87550994                           | NM_009296:-94            | Supt4h1    | PROMOTER               | 2.114                                                        | 6.564                          | 2326.72            | 15273.06           | 13.877                         | 1692.93            | 23493.62           |
| A_68_P28578489 | chr12:82047116-82047160                           | NM_001079694:648         | Srsf5      | INSIDE                 | 2.113                                                        | 3.899                          | 533.87             | 2081.51            | 8.237                          | 451.24             | 3716.87            |
| A_68_P31013736 | chr17:4994894-4994938                             | NM_001085355:-157        | Arid1b     | PROMOTER               | 2.112                                                        | 7.097                          | 7741.52            | 54941.16           | 14.990                         | 5329.90            | 79894.54           |
| A_68_P21767078 | chr2:155518080-155518124                          | NM_001163452:18          | Trpc4ap    | INSIDE                 | 2.112                                                        | 3.247                          | 805.77             | 2616.47            | 6.857                          | 678.22             | 4650.51            |
| A_68_P32362520 | chrX:45387716-45387760                            | NM_013912:291            | Apln       | INSIDE                 | 2.111                                                        | 11.695                         | 2906.03            | 33987.15           | 24.693                         | 1701.13            | 42005.98           |
| A_68_P23332310 | chr4:135700553-135700600                          | NM_008321:840            | Id3        | INSIDE                 | 2.111                                                        | 4.020                          | 265.91             | 1068.88            | 8.487                          | 194.28             | 1648.92            |
| A_68_P21081484 | chr2:26819762-26819806                            | NM_207234:122            | Rexo4      | INSIDE                 | 2.111                                                        | 1.454                          | 1049.76            | 1526.60            | 3.069                          | 779.46             | 2392.39            |
| A_68_P21932364 | chr3:8463041-8463085                              | NR_033512:36             | Gm6194     | INSIDE                 | 2.110                                                        | 4.809                          | 7173.47            | 34497.75           | 10.146                         | 5470.79            | 55505.08           |
| A_68_P26580032 | chr9:63932502-63932546                            | AK01166:3957             |            | INSIDE                 | 2.110                                                        | 8.689                          | 923.42             | 8023.56            | 18.334                         | 876.07             | 10661.57           |
| A_68_P31106282 | chr17:25929216-25929260                           | NM_145410:-9             | Fam173a    | PROMOTER               | 2.109                                                        | 4.902                          | 4593.98            | 22517.64           | 10.336                         | 3445.66            | 35614.77           |
| A_68_P24859175 | chr6:133985925-133985969                          | NM_007961:222            | Etv6       | INSIDE                 | 2.108                                                        | 3.752                          | 3350.18            | 12571.15           | 7.911                          | 2729.27            | 21590.99           |
| A_68_P23296217 | chr4:129012516-129012560                          | NM_009030:76             | Rbbp4      | INSIDE                 | 2.108                                                        | 2.519                          | 1338.36            | 3371.92            | 5.310                          | 1049.62            | 5573.84            |
| A_68_P21212091 | chr2:51004685-51004729                            | NM_028810:-75            | Rnd3       | PROMOTER               | 2.108                                                        | 2.277                          | 362.08             | 824.64             | 4.800                          | 271.24             | 1301.97            |
| A_68_P28159663 | chr11:116351729-116351773                         | NM_026364:-90            | Prpsap1    | PROMOTER               | 2.107                                                        | 11.663                         | 4378.77            | 51068.54           | 24.577                         | 3204.24            | 78750.14           |
| A_68_P31152236 | chr17:34259233-34259277                           | NM_010238:-562           | Brd2       | PROMOTER               | 2.106                                                        | 10.329                         | 4117.14            | 42527.06           | 21.755                         | 2698.80            | 58712.71           |
| A_68_P30447922 | chr15:93426512-93426556                           | NM_001033217:-212        | Prickle1   | PROMOTER               | 2.106                                                        | 6.137                          | 74837.32           | 459288.20          | 12.924                         | 48581.46           | 627876.40          |

| ProbeName      | Target position of probe on CpG island microarray | TargetID               | GeneSymbol    | CpG island Description | Ratio of relative methylation (TiO <sub>2</sub> -NP/Vehicle) | Sham group                     |                    |                    | TiO <sub>2</sub> -H group      |                    |                    |
|----------------|---------------------------------------------------|------------------------|---------------|------------------------|--------------------------------------------------------------|--------------------------------|--------------------|--------------------|--------------------------------|--------------------|--------------------|
|                |                                                   |                        |               |                        |                                                              | Relative methylation (Cy5/Cy3) | Cy3 signal (Input) | Cy5 signal (MeDIP) | Relative methylation (Cy5/Cy3) | Cy3 signal (Input) | Cy5 signal (MeDIP) |
| A_68_P25457391 | chr7:125387085-125387129                          | NM_001031814:45        | Smg1          | INSIDE                 | 2.106                                                        | 4.551                          | 16026.86           | 72944.30           | 9.587                          | 11915.57           | 114231.50          |
| A_68_P31120338 | chr17:28217573-28217617                           | NM_001085555:-10       | Top11         | PROMOTER               | 2.106                                                        | 4.187                          | 3641.41            | 15248.33           | 8.819                          | 2657.60            | 23437.56           |
| A_68_P23272064 | chr4:124762396-124762440                          | NM_027310:28           | Meaf6         | INSIDE                 | 2.105                                                        | 4.439                          | 2277.95            | 10112.16           | 9.343                          | 1719.31            | 16064.02           |
| A_68_P24611353 | chr6:86619098-86619142                            | NM_010751:33           | Mxd1          | INSIDE                 | 2.105                                                        | 4.756                          | 11879.78           | 56499.76           | 10.010                         | 9280.46            | 92901.41           |
| A_68_P22682770 | chr3:157610734-157610778                          | NM_001013806:327       | Ankrd13c      | INSIDE                 | 2.104                                                        | 9.504                          | 13866.58           | 131786.90          | 19.996                         | 9715.78            | 194280.20          |
| A_68_P22319131 | chr3:89200123-89200167                            | NM_009565:-3019        | Zbtb7b        | PROMOTER               | 2.104                                                        | 1.910                          | 3518.56            | 6721.41            | 4.019                          | 2746.25            | 11038.09           |
| A_68_P21108244 | chr2:31169965-31170009                            | ENSMUST00000113532:52  |               | INSIDE                 | 2.104                                                        | 8.863                          | 1254.86            | 11121.21           | 18.649                         | 932.21             | 17385.19           |
| A_68_P27924602 | chr11:74984051-74984095                           | NM_010430:-315         | Hic1          | DIVERGENT_PROMOTER     | 2.102                                                        | 5.021                          | 1961.59            | 9850.01            | 10.557                         | 1570.80            | 16583.45           |
| A_68_P30156691 | chr15:39775111-39775155                           | NM_172814:171          | Lrp12         | INSIDE                 | 2.102                                                        | 11.020                         | 1141.73            | 12582.07           | 23.167                         | 888.50             | 20584.27           |
| A_68_P24116035 | chr5:135845821-135845865                          | NM_145414:20           | Nsun5         | INSIDE                 | 2.102                                                        | 17.612                         | 2746.94            | 48380.36           | 37.014                         | 1782.24            | 65968.27           |
| A_68_P27265105 | chr10:76424885-76424929                           | NM_021568:-214         | Pcbp3         | PROMOTER               | 2.101                                                        | 15.355                         | 9942.78            | 152671.90          | 32.260                         | 6191.69            | 199742.50          |
| A_68_P31422209 | chr17:87682307-87682351                           | NM_028639:103          | Tie7          | INSIDE                 | 2.100                                                        | 3.330                          | 695.26             | 2315.04            | 6.993                          | 552.07             | 3860.37            |
| A_68_P28057142 | chr11:98412381-98412425                           | NM_001166494:-8        | Zpbp2         | DIVERGENT_PROMOTER     | 2.100                                                        | 7.127                          | 4869.52            | 34703.67           | 14.967                         | 3233.09            | 48389.12           |
| A_68_P25365140 | chr7:107154438-107154482                          | NM_133709:-453         | Chrdl2        | PROMOTER               | 2.099                                                        | 6.849                          | 440.36             | 3016.19            | 14.378                         | 378.06             | 5435.81            |
| A_68_P29958335 | chr14:122277673-122277717                         | NM_026861:-133         | Ubac2         | PROMOTER               | 2.099                                                        | 1.758                          | 1369.19            | 2407.09            | 3.691                          | 1136.02            | 4192.80            |
| A_68_P26373433 | chr9:26807126-26807170                            | NM_025862:-14          | Acad8         | DIVERGENT_PROMOTER     | 2.098                                                        | 5.345                          | 17294.92           | 92433.87           | 11.212                         | 11665.23           | 130790.60          |
| A_68_P31879479 | chr18:83126499-83126543                           | NM_001177464:42497     | Zfp516        | INSIDE                 | 2.098                                                        | 9.025                          | 2560.18            | 23104.84           | 18.937                         | 2102.69            | 39819.04           |
| A_68_P22589086 | chr3:141832410-141832454                          | ENSMUST00000106230:-43 |               | PROMOTER               | 2.098                                                        | 5.085                          | 1374.40            | 6989.17            | 10.667                         | 1016.87            | 10846.50           |
| A_68_P31465581 | chr18:4922333-4922377                             | ENSMUST00000143254:631 |               | INSIDE                 | 2.098                                                        | 4.943                          | 1041.55            | 5148.69            | 10.369                         | 737.86             | 7651.00            |
| A_68_P24157329 | chr5:144383488-144383532                          | NM_011182:195          | Cyth3         | INSIDE                 | 2.097                                                        | 5.682                          | 2773.18            | 15757.80           | 11.913                         | 2014.79            | 24002.08           |
| A_68_P32056099 | chr19:30105106-30105150                           | NM_144873:126          | Uhrf2         | INSIDE                 | 2.097                                                        | 6.089                          | 1920.53            | 11693.79           | 12.766                         | 1554.80            | 19847.81           |
| A_68_P26217005 | chr8:122480667-122480711                          | NM_009462:45937        | Usp10         | INSIDE                 | 2.097                                                        | 5.459                          | 7807.56            | 42622.45           | 11.448                         | 5530.16            | 63309.99           |
| A_68_P25097409 | chr7:53435456-53435500                            | NM_011510:-75          | Abcc8         | PROMOTER               | 2.095                                                        | 2.714                          | 766.06             | 2078.86            | 5.685                          | 662.42             | 3765.95            |
| A_68_P29750657 | chr14:79700949-79700993                           | NM_025427:472          | 1190002H23Rik | INSIDE                 | 2.094                                                        | 3.449                          | 1577.46            | 5439.92            | 7.221                          | 1229.53            | 8878.49            |
| A_68_P22752864 | chr4:15941113-15941157                            | NM_145950:-110         | Osgin2        | PROMOTER               | 2.094                                                        | 4.203                          | 1844.34            | 7752.34            | 8.800                          | 1498.32            | 13185.35           |
| A_68_P25747455 | chr8:30329725-30329769                            | NM_153135:362          | Unc5d         | INSIDE                 | 2.094                                                        | 7.058                          | 8318.20            | 58706.24           | 14.778                         | 6527.83            | 96467.42           |
| A_68_P30141373 | chr15:36868452-36868496                           |                        |               | Unknown                | 2.093                                                        | 6.700                          | 1134.05            | 7597.84            | 14.025                         | 878.71             | 12323.46           |
| A_68_P29257223 | chr13:99136439-99136483                           | NM_008242:12261        | Foxd1         | DOWNSTREAM             | 2.092                                                        | 8.661                          | 2174.59            | 18833.71           | 18.116                         | 1799.01            | 32590.48           |
| A_68_P29044041 | chr13:53558129-53558173                           | NM_013601:9999         | Msx2          | DOWNSTREAM             | 2.092                                                        | 5.217                          | 933.42             | 4869.21            | 10.914                         | 666.32             | 7272.46            |
| A_68_P31092441 | chr17:23713283-23713327                           | NM_011747:23150        | Zfp13         | INSIDE                 | 2.092                                                        | 1.581                          | 1651.05            | 2609.73            | 3.307                          | 1243.51            | 4112.10            |
| A_68_P31099001 | chr17:24824425-24824469                           | NM_011522:2448         | Syng3         | INSIDE                 | 2.091                                                        | 8.282                          | 15324.02           | 126913.40          | 17.318                         | 9704.87            | 168065.90          |
| A_68_P21114610 | chr2:32168059-32168103                            | NR_029811:-5899        | Mir199b       | PROMOTER               | 2.090                                                        | 4.476                          | 10196.84           | 45644.87           | 9.354                          | 6842.97            | 64010.85           |
| A_68_P28073802 | chr11:101286306-101286350                         | NM_172566:-70          | Runde1        | PROMOTER               | 2.090                                                        | 4.644                          | 5587.40            | 25946.09           | 9.706                          | 3826.56            | 37141.60           |
| A_68_P30791337 | chr16:58408386-58408430                           | NM_028523:-239         | Debid2        | PROMOTER               | 2.089                                                        | 3.420                          | 3208.27            | 10970.76           | 7.142                          | 2683.72            | 19168.06           |
| A_68_P22293161 | chr3:84619085-84619129                            | NM_001177773:-392      | Fbxw7         | PROMOTER               | 2.089                                                        | 7.473                          | 3528.14            | 26366.72           | 15.611                         | 2725.81            | 42552.94           |
| A_68_P27921682 | chr11:74463075-74463119                           | NM_001081158:100       | 1300001I01Rik | INSIDE                 | 2.088                                                        | 2.414                          | 680.04             | 1641.56            | 5.039                          | 534.85             | 2695.16            |
| A_68_P27257833 | chr10:75130195-75130239                           | NM_172549:96886        | Cabin1        | INSIDE                 | 2.088                                                        | 4.864                          | 1348.50            | 6558.82            | 10.158                         | 1195.82            | 12146.99           |
| A_68_P27579284 | chr11:8564125-8564169                             | NM_001083587:392       | Tns3          | INSIDE                 | 2.088                                                        | 6.420                          | 1932.44            | 12405.84           | 13.402                         | 1474.21            | 19757.56           |
| A_68_P20637774 | chr11:137044071-137044115                         | NM_026823:682          | Arl8a         | INSIDE                 | 2.086                                                        | 7.376                          | 14805.20           | 109197.40          | 15.389                         | 10138.97           | 156028.00          |
| A_68_P29651397 | chr14:62301793-62301837                           | NR_028264:-604         | Dleu2         | PROMOTER               | 2.086                                                        | 5.959                          | 1659.98            | 9891.50            | 12.430                         | 1475.76            | 18342.94           |
| A_68_P22101775 | chr3:45185176-45185220                            | NM_011043:2879         | Pcdh10        | INSIDE                 | 2.086                                                        | 3.350                          | 1178.34            | 3947.95            | 6.990                          | 865.17             | 6047.41            |
| A_68_P32603687 | chrX:109715096-109715140                          | NM_177747:984          | Zfp711        | INSIDE                 | 2.086                                                        | 6.119                          | 1571.52            | 9616.70            | 12.767                         | 999.78             | 12764.45           |
| A_68_P30540368 | chr16:9995820-9995865                             | NM_008170:-3216        | Grin2a        | PROMOTER               | 2.085                                                        | 12.926                         | 6410.38            | 82858.78           | 26.947                         | 4763.33            | 128356.60          |
| A_68_P28956451 | chr13:37870397-37870441                           | ENSMUST00000122842:150 |               | INSIDE                 | 2.085                                                        | 7.454                          | 6420.13            | 47855.92           | 15.540                         | 4503.02            | 69975.92           |
| A_68_P32957122 | A_68_P32957122                                    |                        |               | Unknown                | 2.083                                                        | 2.877                          | 2800.99            | 8058.38            | 5.992                          | 2104.57            | 12611.20           |
| A_68_P21576252 | chr2:120435142-120435186                          | NM_025475:-7           | Haus2         | DIVERGENT_PROMOTER     | 2.082                                                        | 2.017                          | 670.15             | 1351.97            | 4.200                          | 563.13             | 2365.28            |
| A_68_P31161375 | chr17:36002953-36002997                           | NM_001146710:-98       | 2310014H01Rik | PROMOTER               | 2.081                                                        | 4.776                          | 4697.04            | 22432.44           | 9.940                          | 3457.88            | 34370.91           |
| A_68_P27278520 | chr10:79187527-79187571                           | NM_008226:8170         | Hcn2          | INSIDE                 | 2.081                                                        | 10.178                         | 1515.88            | 15429.29           | 21.186                         | 1116.24            | 23649.08           |
| A_68_P22601420 | chr3:143865390-143865434                          | NM_001161769:-52       | Lmo4          | PROMOTER               | 2.081                                                        | 4.028                          | 7512.89            | 30265.03           | 8.383                          | 5764.40            | 48324.41           |
| A_68_P23334806 | chr4:136158309-136158353                          | NM_133872:308          | Kdm1a         | INSIDE                 | 2.080                                                        | 7.767                          | 4209.78            | 32698.79           | 16.158                         | 3270.28            | 52841.38           |
| A_68_P25349892 | chr7:104473950-104473994                          | NM_001177412:502       | Usp35         | INSIDE                 | 2.080                                                        | 2.019                          | 288.84             | 583.25             | 4.200                          | 214.06             | 899.00             |

| ProbeName      | Target position of probe on CpG island microarray | TargetID                | GeneSymbol    | CpG island Description | Ratio of relative methylation (TiO <sub>2</sub> -NP/Vehicle) | Sham group                     |                    |                    | TiO <sub>2</sub> -H group      |                    |                    |
|----------------|---------------------------------------------------|-------------------------|---------------|------------------------|--------------------------------------------------------------|--------------------------------|--------------------|--------------------|--------------------------------|--------------------|--------------------|
|                |                                                   |                         |               |                        |                                                              | Relative methylation (Cy5/Cy3) | Cy3 signal (Input) | Cy5 signal (MeDIP) | Relative methylation (Cy5/Cy3) | Cy3 signal (Input) | Cy5 signal (MeDIP) |
| A_68_P32751751 | chrX:149472100-149472144                          | NM_023788:-16           | Mageh1        | PROMOTER               | 2.079                                                        | 7.842                          | 12021.86           | 94269.69           | 16.303                         | 7384.41            | 120391.60          |
| A_68_P24877027 | chr6:137200894-137200938                          | NM_001164401:97         | Ptpro         | INSIDE                 | 2.079                                                        | 5.823                          | 4168.49            | 24271.80           | 12.108                         | 3191.65            | 38642.87           |
| A_68_P32008156 | chr19:21853273-21853317                           | NM_001033759:463        | Tmem2         | INSIDE                 | 2.079                                                        | 7.297                          | 4595.47            | 33532.42           | 15.169                         | 3279.14            | 49740.42           |
| A_68_P20268947 | chr1:60467002-60467046                            | NM_001198570:562        | Abi2          | INSIDE                 | 2.078                                                        | 4.564                          | 2869.41            | 13096.93           | 9.483                          | 2330.68            | 22101.92           |
| A_68_P23271474 | chr4:124663490-124663534                          | NM_138683:-161          | Rspo1         | PROMOTER               | 2.078                                                        | 4.498                          | 1224.00            | 5505.66            | 9.348                          | 917.28             | 8574.29            |
| A_68_P24118747 | chr5:136438697-136438741                          | NM_001160366:11628      | Srerb4d       | INSIDE                 | 2.078                                                        | 3.036                          | 1843.78            | 5597.98            | 6.308                          | 1464.81            | 9240.73            |
| A_68_P21338948 | chr2:74542744-74542788                            | NM_008276:-779          | Hoxd8         | PROMOTER               | 2.077                                                        | 4.821                          | 1280.62            | 6174.19            | 10.013                         | 960.79             | 9620.80            |
| A_68_P20599489 | chr1:130140741-130140785                          | NM_026390:5             | Ubxn4         | PROMOTER               | 2.077                                                        | 1.596                          | 867.00             | 1383.46            | 3.314                          | 766.74             | 2541.27            |
| A_68_P27186303 | chr10:61949193-61949237                           | NM_001113355:132        | Vps26a        | INSIDE                 | 2.075                                                        | 17.294                         | 1212.62            | 20971.44           | 35.885                         | 866.21             | 31083.98           |
| A_68_P26847149 | chr9:114843024-114843068                          | NM_175380:59            | Gpd1l         | INSIDE                 | 2.074                                                        | 4.714                          | 2036.36            | 9598.68            | 9.776                          | 1631.58            | 15950.71           |
| A_68_P25016218 | chr7:28013554-28013598                            | NM_181593:40            | Itpkc         | INSIDE                 | 2.074                                                        | 7.976                          | 939.09             | 7490.48            | 16.541                         | 687.48             | 11371.60           |
| A_68_P30278749 | chr15:63829759-63829803                           | NM_144846:62230         | Fam49b        | INSIDE                 | 2.073                                                        | 3.646                          | 2844.80            | 10373.26           | 7.558                          | 2230.18            | 16854.81           |
| A_68_P26814202 | chr9:108209138-108209182                          | NM_016802:625           | Rhoa          | INSIDE                 | 2.073                                                        | 11.208                         | 7900.79            | 88551.97           | 23.233                         | 4693.18            | 109038.70          |
| A_68_P25549531 | chr7:142129256-142129301                          | NM_001143802:835        | Fam196a       | INSIDE                 | 2.072                                                        | 3.078                          | 1300.45            | 4002.22            | 6.375                          | 952.86             | 6074.71            |
| A_68_P25992689 | chr8:81636479-81636523                            | NM_178267:84165         | Zfp827        | INSIDE                 | 2.072                                                        | 12.786                         | 10404.52           | 133037.20          | 26.490                         | 6169.84            | 163436.70          |
| A_68_P27787453 | chr11:50044668-50044712                           | NM_145926:5854          | Mgat4b        | INSIDE                 | 2.071                                                        | 2.420                          | 1573.74            | 3808.69            | 5.012                          | 1234.71            | 6187.88            |
| A_68_P20585375 | chr1:127456906-127456950                          | NM_028787:-664          | Slc35f5       | PROMOTER               | 2.071                                                        | 5.325                          | 2201.21            | 11722.48           | 11.029                         | 1528.85            | 16862.37           |
| A_68_P21571594 | chr2:119625143-119625187                          | NM_019392:-85           | Tyro3         | PROMOTER               | 2.071                                                        | 8.860                          | 3983.38            | 35291.72           | 18.347                         | 3170.68            | 58172.74           |
| A_68_P31678555 | chr18:46901926-46901970                           | NM_009681:378           | Ap3s1         | INSIDE                 | 2.070                                                        | 5.852                          | 3619.77            | 21183.18           | 12.116                         | 2582.15            | 31286.58           |
| A_68_P22323963 | chr3:90017329-90017373                            | NM_001190258:219        | Gm9846        | INSIDE                 | 2.068                                                        | 0.262                          | 1139.06            | 298.86             | 0.543                          | 1169.11            | 634.28             |
| A_68_P28202486 | chr12:4824316-4824360                             | NM_025323:-75           | 0610009D07Rik | PROMOTER               | 2.066                                                        | 5.998                          | 7074.81            | 42438.20           | 12.391                         | 5053.47            | 62617.15           |
| A_68_P25263207 | chr7:86938148-86938192                            | NM_008588:306           | Mesp1         | INSIDE                 | 2.066                                                        | 1.675                          | 913.13             | 1529.48            | 3.460                          | 931.29             | 3222.05            |
| A_68_P23962136 | chr5:107003898-107003942                          | ENSMUST00000124394:-185 |               | PROMOTER               | 2.066                                                        | 9.107                          | 6108.38            | 55630.31           | 18.816                         | 4224.86            | 79494.57           |
| A_68_P28842022 | chr13:15555028-15555072                           | NM_008130:-505          | Gli3          | PROMOTER               | 2.065                                                        | 6.713                          | 2389.98            | 16043.20           | 13.862                         | 1884.57            | 26123.75           |
| A_68_P25092565 | chr7:52602361-52602407                            | NM_029741:20005         | Ppfa3         | INSIDE                 | 2.064                                                        | 16.737                         | 4118.57            | 68931.68           | 34.541                         | 2615.55            | 90342.51           |
| A_68_P29270336 | chr13:101602642-101602692                         | NM_022885:716           | Slc30a5       | INSIDE                 | 2.064                                                        | 4.883                          | 1259.48            | 6149.51            | 10.078                         | 939.30             | 9466.16            |
| A_68_P26468513 | chr9:44413201-44413245                            | NM_001110826:248        | Ddx6          | INSIDE                 | 2.063                                                        | 4.714                          | 9476.98            | 44677.44           | 9.726                          | 6618.62            | 64370.16           |
| A_68_P31100482 | chr17:25073578-25073622                           | NM_001163447:322        | Mapk8ip3      | INSIDE                 | 2.063                                                        | 1.495                          | 880.29             | 1315.95            | 3.084                          | 628.83             | 1939.61            |
| A_68_P31161218 | chr17:35978447-35978494                           | NM_001010833:28         | Mdc1          | INSIDE                 | 2.063                                                        | 6.398                          | 6929.61            | 44333.91           | 13.196                         | 5328.21            | 70309.10           |
| A_68_P25797392 | chr8:39723329-39723373                            | NM_145841:1212          | Sgcz          | INSIDE                 | 2.063                                                        | 33.866                         | 2213.30            | 74955.73           | 69.872                         | 1292.88            | 90336.10           |
| A_68_P22878938 | chr4:44769794-44769838                            | NM_138590:386           | Zec7          | INSIDE                 | 2.063                                                        | 3.570                          | 1474.78            | 5264.24            | 7.363                          | 1251.77            | 9216.30            |
| A_68_P27887968 | chr11:68026330-68026374                           | NM_008744:173976        | Ntn1          | INSIDE                 | 2.061                                                        | 8.672                          | 4533.14            | 39310.19           | 17.872                         | 3242.41            | 57949.74           |
| A_68_P22215798 | chr3:68299063-68299107                            | NR_036665:970           | Schip1        | INSIDE                 | 2.061                                                        | 4.193                          | 1799.08            | 7543.33            | 8.640                          | 1428.43            | 12341.43           |
| A_68_P30478150 | chr15:98918593-98918637                           | NM_001024702:-455       | C1ql4         | PROMOTER               | 2.059                                                        | 1.825                          | 1640.51            | 2993.20            | 3.756                          | 1345.67            | 5054.11            |
| A_68_P25273848 | chr7:88908491-88908535                            | NM_025997:674           | Fam103a1      | INSIDE                 | 2.059                                                        | 5.435                          | 741.82             | 4031.91            | 11.189                         | 588.81             | 6587.93            |
| A_68_P27556422 | chr11:4118442-4118486                             | NM_028022:211           | Gatsl3        | INSIDE                 | 2.059                                                        | 7.708                          | 1310.88            | 10104.72           | 15.868                         | 1024.76            | 16260.78           |
| A_68_P32463876 | chrX:70882705-70882749                            | NM_029352:-2053         | Dusp9         | PROMOTER               | 2.058                                                        | 3.948                          | 1322.13            | 5219.25            | 8.125                          | 759.53             | 6171.13            |
| A_68_P23440042 | chr4:155069270-155069314                          | NM_178699:842           | B930041F14Rik | INSIDE                 | 2.057                                                        | 2.160                          | 3207.52            | 6928.72            | 4.444                          | 2257.47            | 10031.80           |
| A_68_P29249638 | chr13:97907886-97907931                           | NM_177266:17            | Gfm2          | INSIDE                 | 2.057                                                        | 6.374                          | 600.32             | 3826.62            | 13.115                         | 435.69             | 5714.06            |
| A_68_P25008850 | chr7:25963997-25964041                            | X53654:548352           |               | INSIDE                 | 2.057                                                        | 5.198                          | 4666.59            | 24258.15           | 10.691                         | 3443.42            | 36814.72           |
| A_68_P26068970 | chr8:95484812-95484856                            | NM_009209:-111          | Slc6a2        | PROMOTER               | 2.056                                                        | 2.600                          | 328.68             | 854.73             | 5.348                          | 259.54             | 1387.98            |
| A_68_P31385961 | A_68_P31385961                                    |                         | Unknown       |                        | 2.056                                                        | 9.617                          | 10513.88           | 101112.50          | 19.776                         | 6821.81            | 134906.90          |
| A_68_P32260645 | chrX:11714194-11714238                            | NM_001168321:23265      | Beor          | INSIDE                 | 2.055                                                        | 1.644                          | 1945.12            | 3196.98            | 3.377                          | 960.88             | 3245.06            |
| A_68_P20644756 | chr1:138131091-138131135                          | NM_028872:-271          | 5730559C18Rik | PROMOTER               | 2.054                                                        | 5.740                          | 1343.02            | 7709.17            | 11.789                         | 979.59             | 11548.56           |
| A_68_P31214913 | chr17:48046778-48046822                           | NM_001110824:14781      | Foxp4         | INSIDE                 | 2.054                                                        | 5.738                          | 6145.33            | 35262.75           | 11.786                         | 4375.44            | 51567.38           |
| A_68_P28290823 | chr12:25335979-25336023                           | NM_178357:-235          | Klfl1         | PROMOTER               | 2.054                                                        | 4.846                          | 5228.33            | 25336.60           | 9.953                          | 3774.20            | 37564.05           |
| A_68_P23397279 | chr4:148275001-148275045                          | NM_027195:96522         | Cas2l         | INSIDE                 | 2.053                                                        | 5.719                          | 3282.49            | 18772.41           | 11.740                         | 2431.91            | 28550.31           |
| A_68_P30630406 | chr16:28445546-28445590                           | NM_183064:-255          | Fgf12         | PROMOTER               | 2.053                                                        | 2.897                          | 1614.92            | 4677.83            | 5.947                          | 1132.49            | 6734.62            |
| A_68_P21902328 | chr2:179960330-179960374                          | NM_001081171:212        | Lama5         | INSIDE                 | 2.052                                                        | 2.789                          | 706.81             | 1971.49            | 5.724                          | 600.12             | 3434.97            |
| A_68_P31928180 | chr19:5349389-5349433                             | NM_028623:164           | Cst6          | INSIDE                 | 2.051                                                        | 6.540                          | 14012.71           | 91648.82           | 13.412                         | 10206.67           | 136892.60          |
| A_68_P28525473 | chr12:72410602-72410646                           | NM_001190466:-246       | Dact1         | PROMOTER               | 2.051                                                        | 4.733                          | 4828.66            | 22854.24           | 9.709                          | 3756.42            | 36472.19           |

| ProbeName      | Target position of probe on CpG island microarray | TargetID                | GeneSymbol    | CpG island Description | Ratio of relative methylation (TiO <sub>2</sub> -NP/Vehicle) | Sham group                     |                    |                    | TiO <sub>2</sub> -H group      |                    |                    |
|----------------|---------------------------------------------------|-------------------------|---------------|------------------------|--------------------------------------------------------------|--------------------------------|--------------------|--------------------|--------------------------------|--------------------|--------------------|
|                |                                                   |                         |               |                        |                                                              | Relative methylation (Cy5/Cy3) | Cy3 signal (Input) | Cy5 signal (MeDIP) | Relative methylation (Cy5/Cy3) | Cy3 signal (Input) | Cy5 signal (MeDIP) |
| A_68_P24382228 | chr6:39206775-39206819                            | ENSMUST00000158797:9145 |               | DOWNSTREAM             | 2.051                                                        | 8.436                          | 13139.72           | 110850.80          | 17.307                         | 8633.86            | 149423.40          |
| A_68_P26685702 | chr9:83699787-83699831                            | NM_001145974:41         | Elov14        | INSIDE                 | 2.050                                                        | 7.487                          | 9488.45            | 71038.47           | 15.349                         | 7623.95            | 117020.20          |
| A_68_P23968450 | chr5:108155208-108155253                          | NM_010278:-1867         | Gfi1          | PROMOTER               | 2.050                                                        | 3.755                          | 599.09             | 2249.65            | 7.697                          | 495.49             | 3813.81            |
| A_68_P31411779 | chr17:86022957-86023001                           | NM_011381:2805          | Six3          | INSIDE                 | 2.050                                                        | 2.885                          | 1519.99            | 4385.06            | 5.913                          | 1232.54            | 7288.03            |
| A_68_P25926494 | chr8:67471391-67471435                            | NM_001163747:329        | Tmem192       | INSIDE                 | 2.049                                                        | 1.823                          | 3191.17            | 5815.94            | 3.734                          | 2491.95            | 9305.58            |
| A_68_P25844867 | chr8:49075341-49075385                            | NM_133791:543           | Wwc2          | INSIDE                 | 2.049                                                        | 5.154                          | 5036.50            | 25958.43           | 10.560                         | 3628.59            | 38319.47           |
| A_68_P32698227 | chrX:136812773-136812817                          | ENSMUST00000130153:-393 |               | PROMOTER               | 2.049                                                        | 4.073                          | 7538.47            | 30704.72           | 8.344                          | 4410.05            | 36799.63           |
| A_68_P30375392 | chr15:80778891-80778935                           | NM_009634:-36           | Adsl          | PROMOTER               | 2.048                                                        | 5.773                          | 6612.32            | 38176.14           | 11.822                         | 4842.27            | 57243.28           |
| A_68_P22310062 | chr3:87599138-87599182                            | NM_001033124:-76        | Ntrk1         | DIVERGENT_PROMOTER     | 2.048                                                        | 4.535                          | 1048.11            | 4753.37            | 9.290                          | 851.34             | 7908.49            |
| A_68_P27340135 | chr10:90586440-90586484                           | NM_133668:246           | Sle25a3       | INSIDE                 | 2.048                                                        | 3.639                          | 885.81             | 3223.11            | 7.451                          | 782.32             | 5828.85            |
| A_68_P26500013 | chr9:49606044-49606088                            | NM_001081445:1108       | Ncam1         | INSIDE                 | 2.047                                                        | 6.334                          | 6147.30            | 38938.26           | 12.967                         | 4556.04            | 59078.64           |
| A_68_P31415137 | chr17:86567183-86567227                           | NM_011104:80            | Prkce         | INSIDE                 | 2.047                                                        | 2.450                          | 2244.27            | 5497.38            | 5.015                          | 1805.14            | 9053.30            |
| A_68_P27953576 | chr11:80114526-80114570                           | NM_139228:135           | Rhbdl3        | INSIDE                 | 2.047                                                        | 5.408                          | 2493.11            | 13483.69           | 11.071                         | 1887.05            | 20891.68           |
| A_68_P23430520 | chr4:153674348-153674392                          | NM_001112744:-366       | Arhgef16      | PROMOTER               | 2.046                                                        | 6.781                          | 4768.04            | 32330.88           | 13.874                         | 3046.91            | 42272.60           |
| A_68_P24160214 | chr5:145016060-145016104                          | NM_018772:-11           | Bri3          | PROMOTER               | 2.046                                                        | 3.409                          | 1012.84            | 3452.90            | 6.976                          | 891.10             | 6216.12            |
| A_68_P20266458 | chr1:59969786-59969830                            | NM_001037725:-41        | Fam117b       | PROMOTER               | 2.045                                                        | 6.604                          | 2387.87            | 15770.47           | 13.504                         | 1898.02            | 25630.46           |
| A_68_P20828236 | chr1:173433692-173433736                          | NM_019484:106           | Refbp2        | INSIDE                 | 2.045                                                        | 2.577                          | 711.82             | 1834.64            | 5.271                          | 588.31             | 3101.00            |
| A_68_P28195044 | chr12:3426740-3426784                             | NR_030694:-15           | 1110002L01Rik | DIVERGENT_PROMOTER     | 2.044                                                        | 6.470                          | 2368.60            | 15325.50           | 13.224                         | 1639.16            | 21676.61           |
| A_68_P29683667 | chr14:67850834-67850879                           | NM_010095:-1272         | Ebf2          | PROMOTER               | 2.044                                                        | 7.888                          | 448.05             | 3534.34            | 16.125                         | 291.83             | 4705.88            |
| A_68_P24535484 | chr6:71221790-71221834                            | NM_145568:-200          | Krcc1         | DIVERGENT_PROMOTER     | 2.044                                                        | 6.040                          | 3652.61            | 22061.07           | 12.346                         | 2689.46            | 33203.28           |
| A_68_P23985069 | chr5:111760075-111760119                          | NM_019640:314           | Pitpnb        | INSIDE                 | 2.044                                                        | 3.246                          | 1597.28            | 5185.40            | 6.636                          | 1287.60            | 8543.96            |
| A_68_P24536895 | chr6:71493871-71493915                            | NM_025783:45            | Vps24         | INSIDE                 | 2.044                                                        | 6.284                          | 3257.70            | 20471.36           | 12.844                         | 2453.21            | 31509.98           |
| A_68_P26253528 | chr8:128258194-128258238                          | NM_025636:114           | Ntprc         | INSIDE                 | 2.043                                                        | 4.405                          | 4197.86            | 18493.38           | 8.999                          | 3121.18            | 28087.87           |
| A_68_P27096130 | chr10:42398668-42398712                           | NM_172416:-31           | Ostm1         | PROMOTER               | 2.043                                                        | 8.153                          | 7419.15            | 60484.62           | 16.654                         | 5007.72            | 83396.75           |
| A_68_P24769157 | chr6:115084895-115084939                          | NM_013681:-3            | Syn2          | PROMOTER               | 2.043                                                        | 2.768                          | 1816.41            | 5028.12            | 5.654                          | 1390.76            | 7863.42            |
| A_68_P29449771 | chr14:21748812-21748856                           | NM_009502:180           | Vcl           | INSIDE                 | 2.043                                                        | 1.657                          | 1740.03            | 2882.66            | 3.385                          | 1324.16            | 4482.62            |
| A_68_P22947351 | chr4:57795187-57795231                            | ENSMUST00000124581:157  |               | INSIDE                 | 2.043                                                        | 4.310                          | 5761.20            | 24831.12           | 8.805                          | 3955.52            | 34829.01           |
| A_68_P27230702 | chr10:70061703-70061747                           | NM_001162846:-6164      | Phyhipl       | PROMOTER               | 2.042                                                        | 3.479                          | 2120.64            | 7376.67            | 7.102                          | 1778.00            | 12627.91           |
| A_68_P31839435 | chr18:75979484-75979528                           | NM_145356:-325          | Zbtb7c        | PROMOTER               | 2.041                                                        | 4.500                          | 2203.19            | 9914.56            | 9.184                          | 1824.68            | 16758.33           |
| A_68_P21394209 | chr2:84555435-84555479                            | NM_144887:-135          | Zdhhc5        | PROMOTER               | 2.041                                                        | 7.232                          | 8025.09            | 58033.93           | 14.762                         | 6272.09            | 92586.57           |
| A_68_P20252736 | chr1:57434804-57434848                            | NM_028546:363           | 1700066M21Rik | INSIDE                 | 2.040                                                        | 7.560                          | 1416.99            | 10712.47           | 15.420                         | 1205.70            | 18591.62           |
| A_68_P24002947 | chr5:114723893-114723937                          | NM_148935:-144          | Foxn4         | PROMOTER               | 2.040                                                        | 1.930                          | 249.67             | 481.97             | 3.938                          | 173.95             | 684.94             |
| A_68_P22321899 | chr3:89635034-89635078                            | NM_172530:-235          | She           | PROMOTER               | 2.040                                                        | 5.853                          | 1470.83            | 8608.54            | 11.942                         | 1263.72            | 15091.48           |
| A_68_P23351277 | chr4:138908735-138908779                          | NM_001039200:249        | C230096C10Rik | INSIDE                 | 2.039                                                        | 5.358                          | 960.53             | 5146.29            | 10.923                         | 813.03             | 8880.43            |
| A_68_P20135584 | chr1:33964894-33964938                            | NM_177235:-450          | Bend6         | PROMOTER               | 2.037                                                        | 3.894                          | 1308.53            | 5095.77            | 7.934                          | 871.14             | 6911.80            |
| A_68_P30349855 | chr15:76502255-76502299                           | NM_033371:167           | Ppp1r16a      | INSIDE                 | 2.037                                                        | 5.148                          | 4503.69            | 23185.47           | 10.486                         | 3132.18            | 32843.45           |
| A_68_P31126789 | chr17:29374780-29374824                           | NM_153166:-67           | Cpne5         | PROMOTER               | 2.036                                                        | 2.750                          | 5129.96            | 14108.92           | 5.599                          | 4116.55            | 23049.87           |
| A_68_P32281785 | chrX:17740258-17740302                            | NM_009483:488           | Kdm6a         | INSIDE                 | 2.036                                                        | 2.133                          | 1484.78            | 3166.69            | 4.342                          | 891.83             | 3872.13            |
| A_68_P25588869 | chr7:148633509-148633553                          | NM_026020:-18           | Rplp2         | DIVERGENT_PROMOTER     | 2.036                                                        | 1.443                          | 1519.74            | 2192.72            | 2.938                          | 1093.90            | 3214.10            |
| A_68_P30255506 | chr15:59479250-59479294                           | NM_144549:-936          | Trib1         | PROMOTER               | 2.036                                                        | 6.079                          | 9403.85            | 57161.85           | 12.376                         | 6351.70            | 78609.39           |
| A_68_P20259677 | chr1:58643036-58643080                            | NM_172513:119           | Fam126b       | INSIDE                 | 2.034                                                        | 5.228                          | 4857.54            | 25394.96           | 10.635                         | 3718.15            | 39544.05           |
| A_68_P24839014 | chr6:128387845-128387889                          | NM_010219:783           | Fkbp4         | INSIDE                 | 2.034                                                        | 8.102                          | 3964.90            | 32121.93           | 16.475                         | 2576.69            | 42451.57           |
| A_68_P30349763 | chr15:76491001-76491045                           | NM_010630:-48           | Kife2         | DIVERGENT_PROMOTER     | 2.034                                                        | 5.654                          | 3010.19            | 17019.65           | 11.499                         | 2241.26            | 25773.16           |
| A_68_P21753788 | chr2:153067075-153067119                          | NM_018807:-2            | Plagl2        | DIVERGENT_PROMOTER     | 2.034                                                        | 5.406                          | 1530.17            | 8272.83            | 10.998                         | 1242.41            | 13664.06           |
| A_68_P32576283 | chrX:101395692-101395736                          | NM_001077354:742        | C77370        | INSIDE                 | 2.033                                                        | 6.035                          | 5902.41            | 35622.69           | 12.267                         | 3428.34            | 42055.65           |
| A_68_P23695553 | chr5:52957300-52957344                            | NM_144945:197           | Lgi2          | INSIDE                 | 2.033                                                        | 6.026                          | 7794.77            | 46973.65           | 12.249                         | 6150.40            | 75336.94           |
| A_68_P26021886 | chr8:87308677-87308721                            | NM_001081982:15541      | Nfix          | INSIDE                 | 2.033                                                        | 3.153                          | 2950.03            | 9300.15            | 6.408                          | 2216.58            | 14204.27           |
| A_68_P21888793 | chr2:177877242-177877286                          | NM_028806:627           | Phactr3       | INSIDE                 | 2.033                                                        | 15.233                         | 3107.48            | 47336.47           | 30.969                         | 1919.41            | 59441.49           |
| A_68_P31122921 | chr17:28660085-28660129                           | NM_026290:-7699         | 4930511I1Rik  | PROMOTER               | 2.032                                                        | 1.699                          | 1585.67            | 2693.97            | 3.452                          | 1228.85            | 4241.70            |
| A_68_P30560747 | chr16:14163515-14163559                           | NM_001114085:169        | Ndel1         | INSIDE                 | 2.032                                                        | 5.369                          | 18178.12           | 97589.71           | 10.906                         | 11694.21           | 127539.10          |
| A_68_P31013265 | chr17:4907805-4907849                             | AK186662:128019         |               | INSIDE                 | 2.032                                                        | 5.461                          | 2831.22            | 15461.30           | 11.095                         | 2051.46            | 22761.46           |

| ProbeName      | Target position of probe on CpG island microarray | TargetID                 | GeneSymbol    | CpG island Description | Ratio of relative methylation (TiO <sub>2</sub> -NP/Vehicle) | Sham group                                             |                               |                               | TiO <sub>2</sub> -H group                              |                               |                               |
|----------------|---------------------------------------------------|--------------------------|---------------|------------------------|--------------------------------------------------------------|--------------------------------------------------------|-------------------------------|-------------------------------|--------------------------------------------------------|-------------------------------|-------------------------------|
|                |                                                   |                          |               |                        |                                                              | Relative methylation (C <sub>5</sub> /C <sub>3</sub> ) | C <sub>3</sub> signal (Input) | C <sub>5</sub> signal (MeDIP) | Relative methylation (C <sub>5</sub> /C <sub>3</sub> ) | C <sub>3</sub> signal (Input) | C <sub>5</sub> signal (MeDIP) |
| A_68_P21113215 | chr2:31939833-31939877                            | NM_175511-629            | Fam78a        | PROMOTER               | 2.031                                                        | 5.322                                                  | 1178.34                       | 6271.46                       | 10.808                                                 | 1047.04                       | 11316.20                      |
| A_68_P27893219 | chr11:68936458-68936502                           | NM_033041-2526           | Hes7          | INSIDE                 | 2.031                                                        | 4.211                                                  | 3734.43                       | 15726.52                      | 8.552                                                  | 2629.86                       | 22489.56                      |
| A_68_P31496424 | chr18:11815840-11815884                           | NM_001081223-488         | Rbbp8         | PROMOTER               | 2.031                                                        | 5.306                                                  | 1302.81                       | 6913.15                       | 10.775                                                 | 937.39                        | 10100.56                      |
| A_68_P24328142 | chr6:29685305-29685349                            | NM_176996-170            | Smo           | PROMOTER               | 2.031                                                        | 6.080                                                  | 4339.25                       | 26382.27                      | 12.347                                                 | 3096.61                       | 38233.21                      |
| A_68_P30596851 | chr16:22265603-22265647                           | NM_009186-378            | Tra2b         | INSIDE                 | 2.031                                                        | 3.657                                                  | 723.92                        | 2647.65                       | 7.430                                                  | 568.60                        | 4224.62                       |
| A_68_P21813623 | chr2:163470481-163470525                          | NR_028113-83             | 0610039K10Rik | PROMOTER               | 2.030                                                        | 6.080                                                  | 3175.66                       | 19308.06                      | 12.340                                                 | 2365.83                       | 29194.46                      |
| A_68_P27569029 | chr11:6447001-6447045                             | NM_001190343-133         | Cem2          | INSIDE                 | 2.030                                                        | 7.059                                                  | 1906.52                       | 13457.51                      | 14.326                                                 | 1432.75                       | 20526.24                      |
| A_68_P33007786 | chr4_random:127770-127814                         | NM_001033326-17991       | Dhrsx         | INSIDE                 | 2.030                                                        | 7.054                                                  | 14713.05                      | 103787.70                     | 14.321                                                 | 9700.82                       | 138923.80                     |
| A_68_P33007785 | chr4_random:127689-127733                         | NM_001033326-17909       | Dhrsx         | INSIDE                 | 2.029                                                        | 9.778                                                  | 14226.98                      | 139116.50                     | 19.840                                                 | 9243.32                       | 183387.90                     |
| A_68_P22899537 | chr4:48292195-48292239                            | NM_029572-245            | Erp44         | INSIDE                 | 2.029                                                        | 6.351                                                  | 2110.38                       | 13402.42                      | 12.888                                                 | 1564.24                       | 20159.97                      |
| A_68_P22934435 | chr4:55545469-55545513                            | NM_010637-143            | Klf4          | PROMOTER               | 2.029                                                        | 4.472                                                  | 1865.43                       | 8341.62                       | 9.073                                                  | 1581.81                       | 14351.88                      |
| A_68_P27285555 | chr10:80260794-80260838                           | NM_023900-555            | Plekhl1       | INSIDE                 | 2.029                                                        | 5.818                                                  | 14811.46                      | 86178.09                      | 11.803                                                 | 10962.46                      | 129386.30                     |
| A_68_P21754954 | chr2:153270097-153270141                          | NM_001001986-97          | 8430427H17Rik | INSIDE                 | 2.028                                                        | 6.050                                                  | 1367.93                       | 8276.38                       | 12.269                                                 | 1143.90                       | 14034.44                      |
| A_68_P28997663 | chr13:44826717-44826761                           | NM_001205043-99          | Jarid2        | INSIDE                 | 2.028                                                        | 5.777                                                  | 5348.99                       | 30900.59                      | 11.717                                                 | 3961.04                       | 46412.44                      |
| A_68_P30514378 | chr16:5203992-5204036                             | NM_013796-91             | Nagpa         | INSIDE                 | 2.028                                                        | 3.462                                                  | 3483.62                       | 12060.51                      | 7.023                                                  | 2716.12                       | 19074.05                      |
| A_68_P27497678 | chr10:119913602-119913646                         | NM_010441-367            | Hmga2         | INSIDE                 | 2.027                                                        | 10.620                                                 | 1669.67                       | 17732.25                      | 21.526                                                 | 1108.46                       | 23860.40                      |
| A_68_P27788199 | chr11:50190689-50190733                           | NM_021510-510            | Hnrmp1        | PROMOTER               | 2.027                                                        | 5.389                                                  | 4503.43                       | 24268.11                      | 10.925                                                 | 3367.63                       | 36792.22                      |
| A_68_P25962148 | chr8:75095909-75095953                            | NM_144534-71             | Tmem38a       | DIVERGENT_PROMOTER     | 2.027                                                        | 3.910                                                  | 3988.38                       | 15596.27                      | 7.928                                                  | 3405.73                       | 27001.85                      |
| A_68_P30436287 | chr15:91403612-91403656                           | NM_001033633-58          | Ste2a13       | INSIDE                 | 2.026                                                        | 8.109                                                  | 4830.94                       | 39175.08                      | 16.427                                                 | 3504.49                       | 57568.49                      |
| A_68_P20621314 | chr11:134314077-134314121                         | NM_172516-69             | Dstyk         | INSIDE                 | 2.025                                                        | 8.533                                                  | 658.52                        | 5619.20                       | 17.275                                                 | 566.30                        | 9782.98                       |
| A_68_P32555655 | chrX:96666023-96666067                            | NM_001083110-30          | Pja1          | INSIDE                 | 2.025                                                        | 2.458                                                  | 1745.67                       | 4290.00                       | 4.976                                                  | 972.49                        | 4838.95                       |
| A_68_P32320545 | chrX:34415031-34415075                            | NM_019668-692            | Ube2a         | INSIDE                 | 2.025                                                        | 3.110                                                  | 1464.24                       | 4554.02                       | 6.297                                                  | 822.03                        | 5176.49                       |
| A_68_P24619664 | chr6:88035091-88035135                            | NM_133933-646            | Rpn1          | INSIDE                 | 2.023                                                        | 2.406                                                  | 687.90                        | 1655.17                       | 4.867                                                  | 583.12                        | 2838.15                       |
| A_68_P23468796 | chr5:8622618-8622662                              | NM_198620-312            | Runde3b       | INSIDE                 | 2.023                                                        | 2.921                                                  | 1876.82                       | 5481.80                       | 5.908                                                  | 1531.02                       | 9044.67                       |
| A_68_P23440100 | chr4:155079091-155079135                          | NM_026899-189            | Ssu72         | INSIDE                 | 2.023                                                        | 4.457                                                  | 9756.79                       | 43489.91                      | 9.016                                                  | 7677.19                       | 69218.56                      |
| A_68_P25232263 | chr7:81157988-81158032                            | NM_009181-558            | St8sia2       | INSIDE                 | 2.023                                                        | 4.807                                                  | 8465.95                       | 40693.13                      | 9.725                                                  | 6151.28                       | 59819.75                      |
| A_68_P32258635 | chrX:11384158-11384202                            |                          |               | Unknown                | 2.023                                                        | 3.830                                                  | 857.33                        | 3283.38                       | 7.748                                                  | 470.95                        | 3649.06                       |
| A_68_P23297489 | chr4:129278119-129278163                          | NM_029748-190            | 2510006D16Rik | INSIDE                 | 2.022                                                        | 9.500                                                  | 6864.88                       | 65215.47                      | 19.211                                                 | 6025.84                       | 115762.80                     |
| A_68_P23925841 | chr5:100157706-100157750                          | NR_030692-351            | A930011G23Rik | INSIDE                 | 2.022                                                        | 3.906                                                  | 1456.65                       | 5689.62                       | 7.898                                                  | 1228.64                       | 9704.30                       |
| A_68_P26137548 | chr8:108583970-108584014                          | NM_010901-490            | Nfat3         | INSIDE                 | 2.022                                                        | 5.688                                                  | 2426.16                       | 13798.89                      | 11.497                                                 | 1782.99                       | 20499.86                      |
| A_68_P29455871 | chr14:22804612-22804656                           | NM_145459-4189           | Zfp503        | INSIDE                 | 2.022                                                        | 3.937                                                  | 2979.74                       | 11729.99                      | 7.960                                                  | 2329.53                       | 18543.92                      |
| A_68_P25297066 | chr7:94395079-94395123                            | NM_015760-204            | Nox4          | PROMOTER               | 2.021                                                        | 2.806                                                  | 1848.01                       | 5184.78                       | 5.670                                                  | 1421.14                       | 8058.25                       |
| A_68_P25505272 | chr7:134489178-134489222                          | NM_146202-372            | Zfp768        | PROMOTER               | 2.021                                                        | 1.770                                                  | 593.28                        | 1049.86                       | 3.577                                                  | 545.91                        | 1952.67                       |
| A_68_P29018253 | chr13:48323422-48323466                           | ENSMUST00000143259-34548 |               | INSIDE                 | 2.021                                                        | 6.626                                                  | 8014.06                       | 53098.56                      | 13.390                                                 | 6186.98                       | 82841.30                      |
| A_68_P26741575 | chr9:95307812-95307856                            | NM_018763-145            | Chst2         | PROMOTER               | 2.020                                                        | 6.357                                                  | 3712.67                       | 23602.70                      | 12.843                                                 | 2845.78                       | 36548.30                      |
| A_68_P23440105 | chr4:155079607-155079651                          | NM_026899-705            | Ssu72         | INSIDE                 | 2.020                                                        | 6.071                                                  | 1128.51                       | 6850.95                       | 12.263                                                 | 891.79                        | 10935.81                      |
| A_68_P32749012 | chrX:148777026-148777070                          | NM_029836-21             | Tspyl2        | PROMOTER               | 2.020                                                        | 6.415                                                  | 31502.22                      | 202084.40                     | 12.961                                                 | 19139.72                      | 248069.50                     |
| A_68_P30588341 | chr16:20591588-20591632                           | NM_182636-1956           | Vwa5b2        | INSIDE                 | 2.020                                                        | 2.519                                                  | 1889.99                       | 4761.39                       | 5.088                                                  | 1498.07                       | 7621.73                       |
| A_68_P21736747 | chr2:149656520-149656564                          | NM_001085521-24          | Tmem90b       | INSIDE                 | 2.019                                                        | 14.996                                                 | 3615.40                       | 54215.89                      | 30.269                                                 | 2609.57                       | 78989.27                      |
| A_68_P24064187 | chr5:125491813-125491857                          | NM_028443-7990           | Fam101a       | INSIDE                 | 2.018                                                        | 3.517                                                  | 2606.98                       | 9168.48                       | 7.098                                                  | 1942.22                       | 13786.55                      |
| A_68_P26693194 | chr9:85220859-85220903                            | NM_001160379-123         | Fam46a        | PROMOTER               | 2.018                                                        | 2.016                                                  | 961.09                        | 1937.50                       | 4.067                                                  | 820.03                        | 3335.24                       |
| A_68_P28036776 | chr11:94982434-94982478                           | NM_010055-1026           | Dlx3          | INSIDE                 | 2.017                                                        | 2.367                                                  | 3116.23                       | 7376.19                       | 4.774                                                  | 2074.45                       | 9904.28                       |
| A_68_P26588443 | chr9:65427955-65427999                            | NM_153119-135            | Plekho2       | DIVERGENT_PROMOTER     | 2.017                                                        | 3.347                                                  | 4537.00                       | 15184.92                      | 6.750                                                  | 3697.39                       | 24956.61                      |
| A_68_P29236942 | chr13:95558754-95558798                           | NM_009321-121            | Tbec          | PROMOTER               | 2.017                                                        | 4.511                                                  | 2758.98                       | 12446.79                      | 9.101                                                  | 2323.29                       | 21144.94                      |
| A_68_P27532842 | chr10:126338342-126338386                         | NM_026858-63             | Xrcc6bp1      | INSIDE                 | 2.017                                                        | 4.400                                                  | 3059.98                       | 13463.66                      | 8.873                                                  | 2300.66                       | 20414.17                      |
| A_68_P30578494 | chr16:18234940-18234984                           | NM_172151-267            | Zdhhc8        | INSIDE                 | 2.017                                                        | 3.442                                                  | 5731.05                       | 19726.11                      | 6.943                                                  | 4192.76                       | 29109.48                      |
| A_68_P21099935 | chr2:29724646-29724690                            | NM_207298-345            | Ceream        | PROMOTER               | 2.016                                                        | 4.334                                                  | 846.01                        | 3666.90                       | 8.736                                                  | 713.80                        | 6236.04                       |
| A_68_P29020011 | chr13:48641397-48641441                           | NR_029725-7777           | Mirlet7a-1    | PROMOTER               | 2.016                                                        | 5.034                                                  | 3588.40                       | 18065.04                      | 10.151                                                 | 2852.00                       | 28949.53                      |
| A_68_P32540976 | chrX:92391835-92391879                            | ENSMUST00000113884-304   |               | INSIDE                 | 2.016                                                        | 7.714                                                  | 9301.38                       | 71751.77                      | 15.552                                                 | 6043.94                       | 93993.33                      |
| A_68_P22882382 | chr4:45355016-45355060                            | NM_153167-66             | Dcaf10        | INSIDE                 | 2.015                                                        | 1.758                                                  | 1505.23                       | 2646.64                       | 3.543                                                  | 1371.16                       | 4857.88                       |
| A_68_P20451399 | chr1:94728353-94728397                            | NM_016696-112            | Gpc1          | INSIDE                 | 2.015                                                        | 7.014                                                  | 1900.79                       | 13332.30                      | 14.136                                                 | 1221.02                       | 17260.24                      |

| ProbeName      | Target position of probe on CpG island microarray | TargetID           | GeneSymbol    | CpG island Description | Ratio of relative methylation (TiO <sub>2</sub> -NP/Vehicle) | Sham group                     |                    |                    | TiO <sub>2</sub> -H group      |                    |                    |
|----------------|---------------------------------------------------|--------------------|---------------|------------------------|--------------------------------------------------------------|--------------------------------|--------------------|--------------------|--------------------------------|--------------------|--------------------|
|                |                                                   |                    |               |                        |                                                              | Relative methylation (Cy5/Cy3) | Cy3 signal (Input) | Cy5 signal (MeDIP) | Relative methylation (Cy5/Cy3) | Cy3 signal (Input) | Cy5 signal (MeDIP) |
| A_68_P21747518 | chr2:151908021-151908065                          | NM_001160410:778   | Scrt2         | INSIDE                 | 2.015                                                        | 5.702                          | 6790.30            | 38718.10           | 11.488                         | 4305.90            | 49465.33           |
| A_68_P28881600 | chr13:23556264-23556308                           | NM_013483:1484     | Btn1a1        | INSIDE                 | 2.014                                                        | 3.623                          | 1561.40            | 5656.95            | 7.296                          | 1294.60            | 9445.96            |
| A_68_P27542462 | chr10:128082827-128082871                         | NM_011772:201      | Ikzf4         | INSIDE                 | 2.014                                                        | 6.594                          | 3300.43            | 21761.88           | 13.277                         | 2547.16            | 33818.33           |
| A_68_P22413373 | chr3:108365105-108365149                          | NM_026198:258      | Tmem167b      | INSIDE                 | 2.014                                                        | 5.899                          | 11035.30           | 65100.15           | 11.883                         | 7806.95            | 92767.71           |
| A_68_P32054917 | chr19:29880262-29880306                           | NM_172836:215      | 9930021J03Rik | INSIDE                 | 2.013                                                        | 8.406                          | 1611.24            | 13543.82           | 16.922                         | 1113.14            | 18836.77           |
| A_68_P23430516 | chr4:153673821-153673865                          | NM_001112744:162   | Arhgef16      | INSIDE                 | 2.012                                                        | 3.473                          | 3277.71            | 11382.83           | 6.988                          | 2371.01            | 16569.62           |
| A_68_P26015683 | chr8:86132210-86132254                            | NM_018808:159      | Dnajb1        | INSIDE                 | 2.012                                                        | 3.343                          | 2738.47            | 9154.51            | 6.726                          | 2170.21            | 14596.54           |
| A_68_P26224550 | chr8:123632450-123632508                          | NM_001166482:-199  | Mthfsd        | DIVERGENT_PROMOTER     | 2.012                                                        | 13.659                         | 8664.67            | 118351.90          | 27.485                         | 5760.48            | 158325.40          |
| A_68_P29596330 | chr14:50682188-50682232                           | AK041390:1176      |               | INSIDE                 | 2.012                                                        | 2.046                          | 949.94             | 1944.02            | 4.118                          | 747.94             | 3080.16            |
| A_68_P24608765 | chr6:86145281-86145325                            | NM_031199:58       | Tgfa          | INSIDE                 | 2.011                                                        | 4.196                          | 265.89             | 1115.69            | 8.439                          | 229.08             | 1933.18            |
| A_68_P32326603 | chrX:35543022-35543066                            | NM_001079513:75    | Zbtb33        | INSIDE                 | 2.011                                                        | 4.310                          | 831.73             | 3584.55            | 8.668                          | 491.76             | 4262.69            |
| A_68_P24864944 | chr6:135015833-135015878                          | NM_181444:176      | Gprc5a        | INSIDE                 | 2.010                                                        | 8.465                          | 1809.30            | 15316.48           | 17.014                         | 1441.62            | 24527.37           |
| A_68_P33005811 | A_68_P33005811                                    |                    |               | Unknown                | 2.010                                                        | 7.835                          | 405.82             | 3179.55            | 15.748                         | 365.25             | 5751.97            |
| A_68_P26022583 | chr8:87432507-87432551                            | NM_010062:6        | Dnase2a       | INSIDE                 | 2.009                                                        | 11.553                         | 2603.56            | 30078.45           | 23.214                         | 1599.71            | 37136.06           |
| A_68_P24784010 | chr6:117867385-117867429                          | NM_001166427:95    | Hnrnpf        | INSIDE                 | 2.009                                                        | 4.788                          | 2320.95            | 11113.62           | 9.618                          | 1897.26            | 18248.16           |
| A_68_P22696144 | chr4:4066014-4066058                              | NM_001002927:-444  | Penk          | PROMOTER               | 2.009                                                        | 5.062                          | 1845.48            | 9341.22            | 10.168                         | 1526.33            | 15519.67           |
| A_68_P27564785 | chr11:5641343-5641387                             | NM_178623:-185     | Urgcp         | PROMOTER               | 2.009                                                        | 0.300                          | 1036.82            | 310.68             | 0.602                          | 1175.91            | 707.96             |
| A_68_P25616898 | chr8:4259319-4259363                              | NM_183315:-66      | Ctxn1         | PROMOTER               | 2.007                                                        | 4.280                          | 4968.20            | 21264.26           | 8.592                          | 3603.90            | 30964.43           |
| A_68_P31156111 | chr17:34987166-34987210                           | NM_021337:-39      | Skiv2l        | DIVERGENT_PROMOTER     | 2.007                                                        | 5.126                          | 962.58             | 4934.17            | 10.287                         | 766.37             | 7883.27            |
| A_68_P20614481 | chr11:133141395-133141439                         | NM_018750:339      | Rassf5        | INSIDE                 | 2.006                                                        | 1.595                          | 980.47             | 1563.95            | 3.200                          | 835.62             | 2674.01            |
| A_68_P25670551 | chr8:13785477-13785521                            | NM_025924:-116     | Upf3a         | PROMOTER               | 2.006                                                        | 1.435                          | 1349.51            | 1936.78            | 2.880                          | 977.43             | 2814.58            |
| A_68_P29024653 | chr13:49436665-49436709                           | NM_001039179:-231  | Bicd2         | PROMOTER               | 2.005                                                        | 1.473                          | 918.00             | 1352.30            | 2.953                          | 718.95             | 2123.30            |
| A_68_P31836381 | chr18:75502057-75502101                           |                    |               | Unknown                | 2.005                                                        | 5.647                          | 7194.94            | 40631.71           | 11.322                         | 5950.74            | 67373.66           |
| A_68_P28328448 | chr12:31596461-31596505                           | NM_001110239:-5    | Acp1          | DIVERGENT_PROMOTER     | 2.003                                                        | 3.807                          | 1330.58            | 5065.67            | 7.626                          | 1077.42            | 8216.80            |
| A_68_P26571039 | chr9:62384681-62384725                            | NM_175484:149      | Coro2b        | INSIDE                 | 2.003                                                        | 9.729                          | 15328.83           | 149132.30          | 19.488                         | 12051.50           | 234861.50          |
| A_68_P26658192 | chr9:77961262-77961306                            | NM_019987:240      | Ick           | INSIDE                 | 2.003                                                        | 10.295                         | 19505.51           | 200801.00          | 20.621                         | 11145.86           | 229837.30          |
| A_68_P21906908 | chr2:180628801-180628845                          | NR_029538:78       | Mir124a-3     | DOWNSTREAM             | 2.003                                                        | 1.584                          | 457.25             | 724.51             | 3.173                          | 393.78             | 1249.64            |
| A_68_P21152636 | chr2:39045852-39045896                            | NM_178778:376      | Scai          | INSIDE                 | 2.003                                                        | 6.019                          | 21465.77           | 129193.80          | 12.053                         | 15269.99           | 184042.30          |
| A_68_P28080444 | chr11:102467782-102467826                         | NM_020510:2060     | Fzd2          | INSIDE                 | 2.002                                                        | 1.520                          | 598.43             | 909.33             | 3.043                          | 460.34             | 1400.67            |
| A_68_P26588687 | chr9:65478956-65479000                            | NM_028030:590      | Rbpms2        | INSIDE                 | 2.002                                                        | 7.101                          | 1348.61            | 9576.98            | 14.215                         | 1028.12            | 14614.30           |
| A_68_P27842891 | chr11:60230619-60230663                           | NM_025757:-6       | 4933439F18Rik | DIVERGENT_PROMOTER     | 2.001                                                        | 5.082                          | 6324.86            | 32141.10           | 10.170                         | 4611.32            | 46897.03           |
| A_68_P23447093 | chr5:3802955-3802999                              | NM_001003909:133   | Ankib1        | INSIDE                 | 2.001                                                        | 4.414                          | 2001.52            | 8835.30            | 8.832                          | 1594.37            | 14080.72           |
| A_68_P25264893 | chr7:87260180-87260224                            | NM_173011:34       | Idh2          | INSIDE                 | 2.001                                                        | 5.771                          | 760.03             | 4386.16            | 11.547                         | 694.19             | 8015.83            |
| A_68_P27901897 | chr11:70468130-70468174                           | NM_011072:0        | Pfn1          | INSIDE                 | 2.001                                                        | 12.585                         | 2812.51            | 35396.18           | 25.178                         | 2091.82            | 52667.40           |
| A_68_P24816773 | chr6:124696183-124696227                          | NM_007881:10301    | Atn1          | INSIDE                 | 2.000                                                        | 4.992                          | 1835.22            | 9160.55            | 9.981                          | 1390.13            | 13875.38           |
| A_68_P32380519 | chrX:49518713-49518757                            | NM_008150:-634     | Gpe4          | PROMOTER               | 2.000                                                        | 3.934                          | 2022.85            | 7957.44            | 7.869                          | 1423.61            | 11202.84           |
| A_68_P24176699 | chr5:148769334-148769378                          | NM_029920:461      | Mtus2         | INSIDE                 | 2.000                                                        | 5.862                          | 4947.09            | 28999.70           | 11.723                         | 3794.87            | 44486.85           |
| A_68_P21359595 | chr2:77654503-77654547                            | NM_178723:349      | Zfp385b       | INSIDE                 | 2.000                                                        | 4.636                          | 925.18             | 4289.04            | 9.270                          | 697.33             | 6464.28            |
| A_68_P23658789 | chr5:46248126-46248170                            | NM_172153:-357     | Lcorl         | PROMOTER               | 1.999                                                        | 2.835                          | 1420.42            | 4026.53            | 5.666                          | 1124.72            | 6372.68            |
| A_68_P20998559 | chr2:9970073-9970117                              | NM_027748:142      | Taf3          | INSIDE                 | 1.999                                                        | 3.882                          | 2680.44            | 10404.16           | 7.759                          | 2242.04            | 17396.16           |
| A_68_P23447098 | chr5:3803414-3803458                              | NR_033173:256      | Krit1         | INSIDE                 | 1.998                                                        | 5.399                          | 2144.76            | 11579.96           | 10.788                         | 1737.16            | 18740.61           |
| A_68_P24804564 | chr6:121423714-121423758                          | NM_001033354:-40   | Iqsec3        | PROMOTER               | 1.997                                                        | 3.206                          | 1771.26            | 5679.11            | 6.403                          | 1380.83            | 8841.48            |
| A_68_P25507242 | chr7:134920047-134920091                          | NM_178029:-834     | Setd1a        | PROMOTER               | 1.997                                                        | 4.883                          | 785.76             | 3837.16            | 9.754                          | 536.84             | 5236.52            |
| A_68_P32766764 | chrX:153929309-153929353                          | NM_009214:648      | Sms           | INSIDE                 | 1.997                                                        | 4.112                          | 1440.88            | 5924.68            | 8.211                          | 837.57             | 6877.17            |
| A_68_P20012423 | chr1:6373229-6373273                              | NM_001195732:23839 | Fam150a       | INSIDE                 | 1.996                                                        | 3.088                          | 938.57             | 2898.62            | 6.165                          | 860.84             | 5306.75            |
| A_68_P21221051 | chr2:52531541-52531585                            | NM_001037099:539   | Caenb4        | INSIDE                 | 1.994                                                        | 6.214                          | 1722.92            | 10705.97           | 12.392                         | 1153.42            | 14292.68           |
| A_68_P21418382 | chr2:90519554-90519598                            | NM_021512:2205     | Nup160        | INSIDE                 | 1.994                                                        | 5.312                          | 8159.69            | 43345.81           | 10.590                         | 6258.95            | 66281.53           |
| A_68_P26140014 | chr8:109035535-109035580                          | NM_001037809:745   | Cdh3          | INSIDE                 | 1.993                                                        | 3.372                          | 10881.57           | 36690.04           | 6.721                          | 7717.80            | 51872.65           |
| A_68_P22378552 | chr3:101816741-101816785                          | NM_178777:2695     | Nhlh2         | INSIDE                 | 1.993                                                        | 4.711                          | 4515.17            | 21271.37           | 9.388                          | 3478.52            | 32656.96           |
| A_68_P23018376 | chr4:73436995-73437039                            | NM_001017427:-510  | Rasef         | PROMOTER               | 1.993                                                        | 7.837                          | 1435.05            | 11246.82           | 15.617                         | 1145.53            | 17889.46           |
| A_68_P20877753 | chr1:182708067-182708111                          | AK013590:116       |               | INSIDE                 | 1.993                                                        | 2.064                          | 359.44             | 741.95             | 4.115                          | 393.88             | 1620.70            |

| ProbeName      | Target position of probe on CpG island microarray | TargetID                | GeneSymbol    | CpG island Description | Ratio of relative methylation (TiO <sub>2</sub> -NP/Vehicle) | Sham group                     |                    |                    | TiO <sub>2</sub> -H group      |                    |                    |
|----------------|---------------------------------------------------|-------------------------|---------------|------------------------|--------------------------------------------------------------|--------------------------------|--------------------|--------------------|--------------------------------|--------------------|--------------------|
|                |                                                   |                         |               |                        |                                                              | Relative methylation (Cy5/Cy3) | Cy3 signal (Input) | Cy5 signal (MeDIP) | Relative methylation (Cy5/Cy3) | Cy3 signal (Input) | Cy5 signal (MeDIP) |
| A_68_P32321491 | chrX:34588512-34588556                            | NM_173779:-305          | Ankrd58       | PROMOTER               | 1.991                                                        | 3.764                          | 4900.57            | 18445.54           | 7.492                          | 3053.16            | 22875.36           |
| A_68_P25505711 | chr7:134615245-134615289                          | NM_145589:139           | Prr14         | INSIDE                 | 1.991                                                        | 1.548                          | 1093.16            | 1692.00            | 3.081                          | 841.95             | 2593.98            |
| A_68_P28175491 | chr11:118907932-118907976                         | NM_013926:-5727         | Cbx8          | PROMOTER               | 1.989                                                        | 1.758                          | 536.84             | 943.64             | 3.497                          | 458.11             | 1601.84            |
| A_68_P33008826 | chr4_random:110027-110071                         | NM_001033326:247        | Dhrsx         | INSIDE                 | 1.989                                                        | 5.009                          | 2018.28            | 10110.10           | 9.965                          | 1605.78            | 16000.96           |
| A_68_P24942904 | chr6:148895207-148895251                          | NM_019643:-274          | Fam60a        | PROMOTER               | 1.989                                                        | 4.671                          | 2575.90            | 12031.24           | 9.289                          | 2051.98            | 19060.53           |
| A_68_P23029295 | chr4:76095885-76095929                            | NM_011211:144297        | Ptprd         | INSIDE                 | 1.989                                                        | 6.927                          | 2157.13            | 14942.00           | 13.775                         | 1517.81            | 20907.64           |
| A_68_P27177056 | chr10:60293675-60293719                           | NM_029770:633           | Unc5b         | INSIDE                 | 1.989                                                        | 3.673                          | 1451.34            | 5330.04            | 7.303                          | 1228.29            | 8970.39            |
| A_68_P22319097 | chr3:89196146-89196190                            | NM_009565:957           | Zbtb7b        | INSIDE                 | 1.989                                                        | 0.704                          | 1297.39            | 913.61             | 1.400                          | 1152.06            | 1613.43            |
| A_68_P24774306 | chr6:115943883-115943927                          | NM_026376:1119          | Plxnd1        | INSIDE                 | 1.988                                                        | 5.492                          | 1597.59            | 8773.58            | 10.917                         | 1045.67            | 11415.58           |
| A_68_P20294265 | chr1:64784540-64784584                            | NM_001042659:-238       | Fzd5          | PROMOTER               | 1.987                                                        | 4.693                          | 1117.88            | 5245.69            | 9.322                          | 838.15             | 7813.62            |
| A_68_P29369781 | chr13:119503243-119503287                         | NM_008002:-241          | Fgf10         | PROMOTER               | 1.986                                                        | 4.921                          | 7424.08            | 36535.57           | 9.775                          | 5894.22            | 57617.72           |
| A_68_P26430635 | chr9:37240928-37240972                            | NM_001164767:-190       | Robo3         | PROMOTER               | 1.986                                                        | 5.036                          | 3993.54            | 20110.91           | 10.002                         | 2951.93            | 29524.69           |
| A_68_P32557243 | chrX:97015613-97015657                            | NM_001081283:-773       | Tmem28        | PROMOTER               | 1.986                                                        | 2.695                          | 738.08             | 1989.24            | 5.353                          | 374.47             | 2004.59            |
| A_68_P30593952 | chr16:21695060-21695104                           | NM_001001881:-344       | 251009E07Rik  | PROMOTER               | 1.985                                                        | 1.567                          | 1249.70            | 1958.13            | 3.110                          | 936.20             | 2911.16            |
| A_68_P30958538 | chr16:90727762-90727806                           | NM_025642:-168          | 2610039C10Rik | PROMOTER               | 1.985                                                        | 7.148                          | 6153.67            | 43986.93           | 14.192                         | 4023.20            | 57098.84           |
| A_68_P21419450 | chr3:90726161-90726205                            | NM_026161:240           | C1qtnf4       | INSIDE                 | 1.985                                                        | 3.211                          | 2122.23            | 6815.20            | 6.373                          | 1771.75            | 11291.25           |
| A_68_P21613749 | chr2:127308338-127308382                          | NM_001111331:-125       | Kcnip3        | PROMOTER               | 1.984                                                        | 9.371                          | 1665.44            | 15607.18           | 18.594                         | 1049.56            | 19515.72           |
| A_68_P24537770 | chr6:71657709-71657753                            | NM_178608:56            | Reep1         | INSIDE                 | 1.984                                                        | 8.149                          | 1094.29            | 8917.83            | 16.167                         | 912.91             | 14759.37           |
| A_68_P31411712 | chr17:86014601-86014645                           | NR_038085:3114          | Six3os1       | INSIDE                 | 1.984                                                        | 4.684                          | 10986.84           | 51460.60           | 9.291                          | 7340.72            | 68205.52           |
| A_68_P28154074 | chr11:115397049-115397093                         | NM_133354:474           | Sumo2         | INSIDE                 | 1.984                                                        | 7.154                          | 14395.30           | 102980.70          | 14.191                         | 11130.77           | 157957.40          |
| A_68_P25958256 | chr8:74203690-74203734                            | NM_001190830:3431       | Jak3          | INSIDE                 | 1.983                                                        | 3.564                          | 823.69             | 2935.98            | 7.070                          | 656.49             | 4641.15            |
| A_68_P32140500 | chr19:45857855-45857899                           | NM_023799:-95           | Mgea5         | PROMOTER               | 1.983                                                        | 7.289                          | 757.01             | 5518.17            | 14.456                         | 564.55             | 8161.40            |
| A_68_P31609277 | chr18:33954596-33954640                           | NR_038151:73            | 2410004N09Rik | INSIDE                 | 1.982                                                        | 1.727                          | 3048.18            | 5263.10            | 3.423                          | 2411.34            | 8253.95            |
| A_68_P28078744 | chr11:102157408-102157452                         | NM_001098836:513        | Atxn7l3       | INSIDE                 | 1.982                                                        | 2.125                          | 1191.74            | 2532.41            | 4.212                          | 930.26             | 3917.90            |
| A_68_P27804074 | chr11:53113101-53113145                           | NM_008300:859           | Hspa4         | INSIDE                 | 1.982                                                        | 3.316                          | 6412.82            | 21267.40           | 6.574                          | 5187.91            | 34105.70           |
| A_68_P26345150 | chr9:20836502-20836546                            | NM_008319:43            | Icam5         | INSIDE                 | 1.982                                                        | 4.277                          | 4438.10            | 18981.33           | 8.477                          | 3506.13            | 29722.46           |
| A_68_P25807719 | chr8:41947388-41947432                            | NM_007514:-310          | Slc7a2        | PROMOTER               | 1.982                                                        | 6.030                          | 7612.40            | 45905.08           | 11.954                         | 5257.46            | 62847.22           |
| A_68_P30363493 | chr15:78798329-78798373                           | NM_001039155:20197      | Triobp        | INSIDE                 | 1.982                                                        | 11.133                         | 1510.57            | 16816.93           | 22.062                         | 976.39             | 21540.76           |
| A_68_P28156930 | chr11:115891653-115891697                         | NM_172569:39            | Unk           | INSIDE                 | 1.982                                                        | 3.224                          | 656.27             | 2115.97            | 6.391                          | 542.34             | 3466.17            |
| A_68_P23962878 | chr5:107125443-107125487                          | NM_026856:385           | Zfp644        | INSIDE                 | 1.982                                                        | 5.364                          | 4973.92            | 26679.75           | 10.633                         | 4228.15            | 44958.50           |
| A_68_P26543338 | chr9:57556763-57556807                            | NM_153799:409           | Edc3          | INSIDE                 | 1.980                                                        | 7.076                          | 3933.06            | 27831.33           | 14.009                         | 2928.64            | 41028.03           |
| A_68_P26622301 | chr9:71333539-71333583                            | NM_001164793:-795       | Grin1a        | PROMOTER               | 1.980                                                        | 2.353                          | 1200.03            | 2824.26            | 4.660                          | 1053.28            | 4908.56            |
| A_68_P25005776 | chr7:25396309-25396353                            | NM_001102613:-16        | Phldb3        | PROMOTER               | 1.980                                                        | 6.753                          | 6453.48            | 43581.39           | 13.373                         | 4202.48            | 56201.35           |
| A_68_P28595369 | chr12:85262700-85262744                           | ENSMUST00000085215:72   |               | INSIDE                 | 1.980                                                        | 3.043                          | 16786.27           | 51079.68           | 6.026                          | 12030.00           | 72496.26           |
| A_68_P27900652 | chr11:70246079-70246123                           | NM_145429:-54           | Arrb2         | PROMOTER               | 1.979                                                        | 2.610                          | 1169.34            | 3052.36            | 5.167                          | 916.74             | 4736.55            |
| A_68_P21395110 | chr2:84712227-84712271                            | NM_199223:14601         | Rtn4rl2       | INSIDE                 | 1.979                                                        | 6.057                          | 2764.73            | 16746.15           | 11.988                         | 2317.19            | 27778.80           |
| A_68_P25370744 | chr7:108123196-108123240                          |                         |               | Unknown                | 1.979                                                        | 2.486                          | 1180.31            | 2934.71            | 4.921                          | 930.79             | 4580.85            |
| A_68_P25911981 | chr8:64238686-64238730                            | NM_001081390:142779     | Palld         | INSIDE                 | 1.978                                                        | 2.275                          | 971.13             | 2209.05            | 4.500                          | 779.80             | 3508.97            |
| A_68_P21042876 | chr2:18919881-18919925                            | NR_024323:-43           | 4930426L09Rik | DIVERGENT_PROMOTER     | 1.977                                                        | 7.301                          | 2991.97            | 21843.57           | 14.432                         | 2189.70            | 31602.67           |
| A_68_P20016449 | chr1:7388374-7388418                              | ENSMUST00000138711:-514 |               | PROMOTER               | 1.977                                                        | 4.924                          | 4200.99            | 20683.63           | 9.733                          | 3349.27            | 32597.71           |
| A_68_P20240346 | chr1:55145446-55145490                            | NM_008303:477           | Hspe1         | INSIDE                 | 1.976                                                        | 4.193                          | 1419.21            | 5951.07            | 8.284                          | 985.84             | 8167.04            |
| A_68_P21070656 | chr2:25080752-25080796                            | NM_146116:-552          | Tubb2c        | PROMOTER               | 1.976                                                        | 4.220                          | 2765.86            | 11672.93           | 8.339                          | 2234.63            | 18633.69           |
| A_68_P30433473 | chr15:90880476-90880520                           | NM_001109040:-119       | Kif21a        | PROMOTER               | 1.975                                                        | 4.611                          | 5323.48            | 24544.24           | 9.106                          | 4245.04            | 38656.75           |
| A_68_P23006650 | chr4:70195415-70195459                            | NM_172694:526           | Megf9         | INSIDE                 | 1.975                                                        | 3.715                          | 8274.32            | 30737.56           | 7.336                          | 6416.84            | 47074.16           |
| A_68_P30650846 | chr16:32079318-32079362                           | NM_177326:19            | Pak2          | INSIDE                 | 1.975                                                        | 8.408                          | 4276.72            | 35957.81           | 16.607                         | 3448.53            | 57270.10           |
| A_68_P27921681 | chr11:74462947-74462991                           | NM_001081158:-28        | 1300001I01Rik | PROMOTER               | 1.974                                                        | 4.812                          | 4348.74            | 20926.06           | 9.500                          | 3488.37            | 33138.09           |
| A_68_P25088286 | chr7:51846961-51847005                            | NM_008422:727           | Kenc3         | INSIDE                 | 1.974                                                        | 6.215                          | 2829.89            | 17588.75           | 12.271                         | 2291.82            | 28124.06           |
| A_68_P31110054 | chr17:26552202-26552246                           | NM_001081656:315        | Neur1b        | INSIDE                 | 1.974                                                        | 5.321                          | 1188.55            | 6323.81            | 10.504                         | 1036.44            | 10886.31           |
| A_68_P27278802 | chr10:79229397-79229442                           | NM_144528:247           | Rnf126        | INSIDE                 | 1.974                                                        | 4.084                          | 5437.70            | 22205.53           | 8.062                          | 4054.43            | 32684.99           |
| A_68_P31479225 | chr18:7869058-7869102                             | NM_001146298:-114       | Wac           | PROMOTER               | 1.974                                                        | 4.017                          | 3388.04            | 13608.31           | 7.928                          | 2757.80            | 21863.00           |
| A_68_P23396578 | chr4:148179082-148179126                          | NM_027195:604           | Cas2l         | INSIDE                 | 1.973                                                        | 5.530                          | 2948.56            | 16304.53           | 10.908                         | 2126.42            | 23195.85           |



| ProbeName      | Target position of probe on CpG island microarray | TargetID                | GeneSymbol    | CpG island Description | Ratio of relative methylation (TiO <sub>2</sub> -NP/Vehicle) | Sham group                     |                    |                    | TiO <sub>2</sub> -H group      |                    |                    |
|----------------|---------------------------------------------------|-------------------------|---------------|------------------------|--------------------------------------------------------------|--------------------------------|--------------------|--------------------|--------------------------------|--------------------|--------------------|
|                |                                                   |                         |               |                        |                                                              | Relative methylation (Cy5/Cy3) | Cy3 signal (Input) | Cy5 signal (MeDIP) | Relative methylation (Cy5/Cy3) | Cy3 signal (Input) | Cy5 signal (MeDIP) |
| A_68_P20963945 | chr2:3630790-3630834                              | NM_025626:83            | Fam107b       | INSIDE                 | 1.973                                                        | 1.721                          | 749.08             | 1289.47            | 3.396                          | 585.50             | 1988.33            |
| A_68_P21783928 | chr2:158436941-158436985                          | NM_009508:469           | Slc32a1       | INSIDE                 | 1.973                                                        | 5.667                          | 21029.26           | 19167.00           | 11.180                         | 15800.81           | 176658.30          |
| A_68_P22630556 | chr3:148650621-148650665                          | ENSMUST00000098518:1638 |               | INSIDE                 | 1.973                                                        | 2.845                          | 6332.89            | 18017.74           | 5.614                          | 4669.41            | 26214.69           |
| A_68_P28432636 | chr12:53071968-53072012                           | NM_177171:318           | Heatr5a       | INSIDE                 | 1.972                                                        | 2.436                          | 3384.93            | 8244.91            | 4.803                          | 2605.10            | 12511.36           |
| A_68_P28053756 | chr11:97847867-97847911                           | NM_001163608:-128       | Ptxdc1        | PROMOTER               | 1.972                                                        | 4.486                          | 1026.12            | 4602.73            | 8.846                          | 764.65             | 6763.79            |
| A_68_P25412183 | chr7:117365487-117365531                          | NM_009302:292           | Swap70        | INSIDE                 | 1.972                                                        | 5.336                          | 5679.82            | 30307.86           | 10.520                         | 4381.06            | 46089.90           |
| A_68_P24124224 | chr5:137507416-137507460                          | NM_001039385:1274       | Vgf           | INSIDE                 | 1.972                                                        | 7.730                          | 2393.17            | 18499.10           | 15.247                         | 1785.80            | 27227.51           |
| A_68_P27591949 | chr11:11585605-11585649                           | NM_001025597:-589       | Ikzf1         | PROMOTER               | 1.971                                                        | 6.461                          | 328.40             | 2121.91            | 12.737                         | 332.67             | 4237.04            |
| A_68_P31992368 | chr19:18745200-18745244                           | NM_026120:-47           | 2410127L17Rik | PROMOTER               | 1.970                                                        | 8.119                          | 1112.52            | 9032.07            | 15.996                         | 768.74             | 12296.69           |
| A_68_P27788005 | chr11:50138862-50138906                           | NM_001110499:291        | Canx          | INSIDE                 | 1.970                                                        | 3.156                          | 5574.41            | 17595.39           | 6.220                          | 4426.17            | 27529.64           |
| A_68_P26242535 | chr8:126473140-126473184                          | NM_172288:3             | Nup133        | INSIDE                 | 1.970                                                        | 3.959                          | 1555.56            | 6157.81            | 7.800                          | 1160.78            | 9054.05            |
| A_68_P23245805 | chr4:119164931-119164975                          | NM_177572:251           | Rimkla        | INSIDE                 | 1.970                                                        | 1.959                          | 817.12             | 1601.11            | 3.860                          | 738.33             | 2849.76            |
| A_68_P28152781 | chr11:115183238-115183282                         | NM_176847:-28           | Ush1g         | PROMOTER               | 1.970                                                        | 9.441                          | 10000.64           | 94413.83           | 18.600                         | 6015.03            | 111879.70          |
| A_68_P29615089 | chr14:55545056-55545100                           | NM_010112:547           | Efs           | INSIDE                 | 1.969                                                        | 2.680                          | 3959.09            | 10609.07           | 5.277                          | 2914.31            | 15377.54           |
| A_68_P29152220 | chr13:76081481-76081525                           | NM_028493:-230          | Rhobtb3       | PROMOTER               | 1.969                                                        | 2.960                          | 1198.54            | 3547.32            | 5.827                          | 851.95             | 4963.87            |
| A_68_P28515845 | chr12:70782400-70782444                           | NM_001135559:417        | Sos2          | INSIDE                 | 1.969                                                        | 2.541                          | 1958.50            | 4975.69            | 5.001                          | 1528.15            | 7642.91            |
| A_68_P21330556 | chr2:73115402-73115446                            | NM_001005343:5442       | Sp9           | DOWNSTREAM             | 1.969                                                        | 4.836                          | 4620.55            | 22345.30           | 9.521                          | 3436.51            | 32718.53           |
| A_68_P29449770 | chr14:21748700-21748744                           | NM_009502:68            | Vcl           | INSIDE                 | 1.969                                                        | 3.193                          | 4035.96            | 12886.43           | 6.286                          | 3134.26            | 19703.38           |
| A_68_P23381901 | chr4:144785001-144785047                          | NM_001128198:-4529      | Vps13d        | PROMOTER               | 1.969                                                        | 2.303                          | 958.14             | 2206.35            | 4.534                          | 812.58             | 3684.09            |
| A_68_P23897553 | chr5:93473897-93473941                            | NM_175270:130           | Ankrd56       | INSIDE                 | 1.968                                                        | 1.785                          | 1103.52            | 1970.25            | 3.513                          | 847.35             | 2977.09            |
| A_68_P30991207 | chr16:96348653-96348697                           | NM_008251:658           | Hmgn1         | INSIDE                 | 1.968                                                        | 2.602                          | 5404.50            | 14060.23           | 5.121                          | 4000.73            | 20487.47           |
| A_68_P27349651 | chr10:92185236-92185280                           | NM_008682:-95           | Nedd1         | PROMOTER               | 1.968                                                        | 4.104                          | 1115.32            | 4576.96            | 8.076                          | 934.49             | 7546.94            |
| A_68_P29023779 | chr13:49283004-49283048                           | NM_013610:111           | Ninj1         | INSIDE                 | 1.968                                                        | 4.358                          | 3369.18            | 14682.72           | 8.576                          | 2531.85            | 21712.21           |
| A_68_P28533645 | chr12:73862367-73862411                           | NM_008910:191           | Ppm1a         | INSIDE                 | 1.968                                                        | 4.045                          | 3217.29            | 13015.10           | 7.962                          | 2569.35            | 20457.82           |
| A_68_P28192906 | chr11:121691796-121691840                         | NM_029049:287           | Ptchd3        | INSIDE                 | 1.968                                                        | 3.225                          | 1636.76            | 5277.73            | 6.345                          | 1415.98            | 8984.10            |
| A_68_P32197338 | chr19:55969833-55969892                           | NM_001142924:52         | Tcf7l2        | INSIDE                 | 1.968                                                        | 5.017                          | 167.54             | 840.57             | 9.872                          | 114.89             | 1134.25            |
| A_68_P30959222 | chr16:90831079-90831123                           | NM_001199210:-3         | 4931408A02Rik | PROMOTER               | 1.967                                                        | 1.517                          | 905.38             | 1373.80            | 2.985                          | 747.69             | 2231.93            |
| A_68_P28115686 | chr11:108782547-108782591                         | NM_015732:906           | Axin2         | INSIDE                 | 1.967                                                        | 3.863                          | 1652.35            | 6382.81            | 7.597                          | 1331.82            | 10117.39           |
| A_68_P23350166 | chr4:138748616-138748660                          | NM_009798:-207          | Capzb         | PROMOTER               | 1.967                                                        | 3.798                          | 6080.09            | 23094.74           | 7.471                          | 4908.49            | 36671.62           |
| A_68_P29614701 | chr14:55482992-55483036                           | NM_001177705:-19        | Homez         | PROMOTER               | 1.967                                                        | 3.067                          | 3193.56            | 9795.99            | 6.033                          | 2541.20            | 15329.78           |
| A_68_P28099140 | chr11:105881863-105881907                         | NM_001037712:12368      | Kenh6         | INSIDE                 | 1.967                                                        | 7.729                          | 2711.08            | 20953.02           | 15.199                         | 1794.72            | 27278.05           |
| A_68_P24954294 | chr7:6107601-6107645                              | NM_001013012:-49        | Zfp787        | PROMOTER               | 1.967                                                        | 4.333                          | 5409.37            | 23436.41           | 8.522                          | 4239.71            | 36128.89           |
| A_68_P32477697 | chrX:74679072-74679116                            |                         |               | Unknown                | 1.967                                                        | 4.351                          | 10388.98           | 45204.71           | 8.559                          | 7505.05            | 64237.52           |
| A_68_P21752520 | chr2:152857602-152857646                          | NM_001011732:37         | Xkr7          | INSIDE                 | 1.966                                                        | 7.358                          | 1460.41            | 10745.14           | 14.466                         | 1068.59            | 15458.44           |
| A_68_P32730437 | chrX:143988143-143988187                          | NM_001081173:460        | Lrch2         | INSIDE                 | 1.965                                                        | 4.409                          | 9704.97            | 42791.58           | 8.664                          | 6149.70            | 53283.79           |
| A_68_P28615786 | chr12:88729140-88729184                           | NM_011479:18            | Sptlc2        | INSIDE                 | 1.965                                                        | 7.386                          | 683.93             | 5051.85            | 14.516                         | 646.96             | 9391.54            |
| A_68_P27644168 | chr11:22967930-22967974                           | ENSMUST00000128996:-45  |               | DIVERGENT_PROMOTER     | 1.965                                                        | 6.515                          | 903.14             | 5884.30            | 12.805                         | 735.16             | 9413.94            |
| A_68_P27289148 | chr10:80827041-80827085                           | NM_001014836:1503       | 4930404N11Rik | INSIDE                 | 1.964                                                        | 4.488                          | 7214.34            | 32377.00           | 8.812                          | 5305.63            | 46755.12           |
| A_68_P29620076 | chr14:56445768-56445812                           | NM_001168346:2159       | Nfatc4        | INSIDE                 | 1.964                                                        | 6.334                          | 3968.26            | 25134.45           | 12.440                         | 2785.42            | 34650.17           |
| A_68_P26464014 | chr9:43611501-43611545                            | NM_021424:58864         | Pvr1l         | INSIDE                 | 1.964                                                        | 6.335                          | 2397.16            | 15184.99           | 12.442                         | 1497.26            | 18628.77           |
| A_68_P22606649 | chr3:144781741-144781785                          | NM_025714:199           | Odf2l         | INSIDE                 | 1.963                                                        | 4.343                          | 4977.82            | 21616.42           | 8.526                          | 3841.15            | 32748.48           |
| A_68_P31256055 | chr17:56568653-56568712                           | NM_011218:47221         | Ptprs         | INSIDE                 | 1.963                                                        | 9.451                          | 507.20             | 4793.44            | 18.548                         | 389.72             | 7228.65            |
| A_68_P27040510 | chr10:30337995-30338039                           | NM_025798:156           | Hint3         | INSIDE                 | 1.962                                                        | 3.176                          | 1065.95            | 3384.99            | 6.229                          | 904.96             | 5637.29            |
| A_68_P20173639 | chr11:40847463-40847507                           | NM_172499:18            | Mfsd9         | INSIDE                 | 1.962                                                        | 7.038                          | 1091.71            | 7683.65            | 13.809                         | 885.85             | 12232.37           |
| A_68_P22341853 | chr3:94819143-94819187                            | NM_030074:-4            | Zfp687        | PROMOTER               | 1.962                                                        | 4.849                          | 808.04             | 3917.86            | 9.511                          | 672.38             | 6395.29            |
| A_68_P33012155 | chr9_random:54509-54553                           | NR_027950:-162          | 4930526115Rik | PROMOTER               | 1.961                                                        | 3.299                          | 5356.65            | 17673.86           | 6.469                          | 3968.95            | 25675.00           |
| A_68_P22130346 | chr3:51364011-51364056                            | NR_033624:355           | 5031434011Rik | INSIDE                 | 1.960                                                        | 3.201                          | 3208.33            | 10271.15           | 6.274                          | 2445.68            | 15345.16           |
| A_68_P26659639 | chr9:78296196-78296240                            | NM_026658:202           | Mto1          | INSIDE                 | 1.960                                                        | 1.795                          | 397.62             | 713.77             | 3.518                          | 481.25             | 1693.03            |
| A_68_P24850990 | chr6:131383791-131383835                          |                         |               | Unknown                | 1.960                                                        | 3.368                          | 888.30             | 2991.42            | 6.601                          | 808.91             | 5339.71            |
| A_68_P25953242 | chr8:73183309-73183353                            | NM_023217:250           | Pgppp1        | INSIDE                 | 1.959                                                        | 1.778                          | 3492.00            | 6208.53            | 3.483                          | 2420.79            | 8431.85            |
| A_68_P25276873 | chr7:89483916-89483960                            | NM_001190374:-265       | Adamsl3       | PROMOTER               | 1.957                                                        | 2.496                          | 301.10             | 751.49             | 4.885                          | 287.88             | 1406.35            |

| ProbeName      | Target position of probe on CpG island microarray | TargetID           | GeneSymbol    | CpG island Description | Ratio of relative methylation (TiO <sub>2</sub> -NP/Vehicle) | Sham group                     |                    |                    | TiO <sub>2</sub> -H group      |                    |                    |
|----------------|---------------------------------------------------|--------------------|---------------|------------------------|--------------------------------------------------------------|--------------------------------|--------------------|--------------------|--------------------------------|--------------------|--------------------|
|                |                                                   |                    |               |                        |                                                              | Relative methylation (Cy5/Cy3) | Cy3 signal (Input) | Cy5 signal (MeDIP) | Relative methylation (Cy5/Cy3) | Cy3 signal (Input) | Cy5 signal (MeDIP) |
| A_68_P27365029 | chr10:94878409-94878453                           | NM_001168656-312   | Socs2         | PROMOTER               | 1.957                                                        | 3.650                          | 1261.25            | 4603.74            | 7.144                          | 1029.49            | 7354.78            |
| A_68_P24946816 | chr7:3637239-3637283                              | NM_029934:7867     | Mboat7        | INSIDE                 | 1.956                                                        | 4.635                          | 2593.16            | 12018.65           | 9.064                          | 2031.67            | 18415.71           |
| A_68_P31140911 | chr17:31773548-31773592                           | NM_178224:506      | Cbs           | INSIDE                 | 1.954                                                        | 3.316                          | 7744.08            | 25678.94           | 6.479                          | 5771.70            | 37394.65           |
| A_68_P22942460 | chr4:56960340-56960384                            | NM_175518:-61      | D730040F13Rik | PROMOTER               | 1.954                                                        | 3.183                          | 1863.90            | 5932.74            | 6.221                          | 1527.94            | 9504.93            |
| A_68_P30343819 | chr15:75578604-75578648                           | NM_194350:-274     | Mafa          | PROMOTER               | 1.953                                                        | 3.653                          | 1220.29            | 4457.21            | 7.135                          | 915.27             | 6530.09            |
| A_68_P24951794 | chr7:5004858-5004902                              | NM_026900:1747     | Zfp580        | INSIDE                 | 1.953                                                        | 11.439                         | 6702.51            | 76672.71           | 22.347                         | 4388.05            | 98058.91           |
| A_68_P22060448 | chr3:36762071-36762115                            | NM_172679:65       | 4932438A13Rik | INSIDE                 | 1.952                                                        | 2.163                          | 1441.07            | 3116.81            | 4.222                          | 1152.18            | 4864.87            |
| A_68_P23361905 | chr4:140616349-140616393                          | NM_172122:-6794    | Croce         | PROMOTER               | 1.952                                                        | 1.574                          | 3797.77            | 5976.06            | 3.071                          | 3180.60            | 9768.25            |
| A_68_P25005645 | chr7:25370764-25370808                            | NM_023154:-1775    | Ethe1         | PROMOTER               | 1.952                                                        | 5.784                          | 9677.20            | 55972.42           | 11.292                         | 6298.59            | 71125.48           |
| A_68_P23807625 | chr5:75548984-75549028                            | NM_001083316-3184  | Pdgfra        | PROMOTER               | 1.952                                                        | 3.211                          | 2425.96            | 7790.23            | 6.267                          | 1751.08            | 10974.80           |
| A_68_P28598116 | chr12:85750091-85750135                           | NM_025525:-8037    | Rnf113a2      | PROMOTER               | 1.952                                                        | 7.688                          | 929.08             | 7143.04            | 15.009                         | 656.03             | 9846.31            |
| A_68_P31163327 | chr17:36394876-36394920                           | NM_026308:-107     | Rpp21         | PROMOTER               | 1.952                                                        | 6.137                          | 1187.76            | 7289.19            | 11.981                         | 1029.28            | 12331.59           |
| A_68_P26158736 | chr8:112261757-112261801                          | NM_001080930-139   | Atxn11        | PROMOTER               | 1.951                                                        | 1.963                          | 1818.15            | 3569.42            | 3.830                          | 1494.02            | 5721.52            |
| A_68_P27788006 | chr11:50138948-50138992                           | NM_001110499:205   | Canx          | INSIDE                 | 1.951                                                        | 4.085                          | 5502.89            | 22480.34           | 7.970                          | 3802.85            | 30309.46           |
| A_68_P21134366 | chr2:35438211-35438255                            | NM_001114125:24255 | Dab2ip        | INSIDE                 | 1.951                                                        | 9.744                          | 1321.86            | 12879.94           | 19.014                         | 1073.76            | 20416.14           |
| A_68_P21978078 | chr3:19957968-19958012                            | NM_144959:180      | Hltf          | INSIDE                 | 1.951                                                        | 4.988                          | 7603.38            | 37929.07           | 9.733                          | 5994.60            | 58346.11           |
| A_68_P31097493 | chr17:24606963-24607007                           | NM_025954:-433     | Pgp           | PROMOTER               | 1.951                                                        | 7.982                          | 4367.45            | 34859.26           | 15.570                         | 2531.42            | 39413.34           |
| A_68_P21769931 | chr2:156005366-156005410                          | NM_133242:588      | Rbm39         | INSIDE                 | 1.951                                                        | 4.336                          | 1368.97            | 5936.39            | 8.462                          | 1195.59            | 10116.89           |
| A_68_P24459338 | chr6:53768811-53768855                            | NM_025817:1987     | Tril          | INSIDE                 | 1.951                                                        | 6.346                          | 4390.67            | 27862.05           | 12.382                         | 3566.54            | 44159.98           |
| A_68_P26238816 | chr8:125778247-125778291                          | NM_020497:174      | Zfp276        | INSIDE                 | 1.951                                                        | 7.620                          | 4136.00            | 31517.69           | 14.868                         | 3031.78            | 45076.72           |
| A_68_P29996479 | chr15:7760686-7760730                             | NM_010275:-302     | Gdnf          | PROMOTER               | 1.950                                                        | 9.773                          | 1415.04            | 13828.45           | 19.057                         | 1081.20            | 20604.19           |
| A_68_P30500682 | chr15:102752309-102752353                         | NM_010464:769      | Hoxc13        | INSIDE                 | 1.950                                                        | 2.090                          | 437.20             | 913.94             | 4.076                          | 393.05             | 1601.97            |
| A_68_P24448786 | chr6:52122729-52122773                            | NM_010452:40316    | Hoxa3         | INSIDE                 | 1.949                                                        | 3.590                          | 2816.44            | 10111.45           | 6.999                          | 2194.43            | 15358.72           |
| A_68_P32239859 | chrX:7305710-7305754                              | NM_138602:36       | Praf2         | INSIDE                 | 1.949                                                        | 1.561                          | 944.87             | 1475.33            | 3.044                          | 603.67             | 1837.49            |
| A_68_P21819631 | chr2:164595113-164595157                          | NM_026785:-294     | Ube2c         | PROMOTER               | 1.949                                                        | 1.547                          | 2320.10            | 3588.52            | 3.015                          | 1901.78            | 5734.30            |
| A_68_P27543031 | chr10:128185237-128185281                         | NM_001170869-319   | Wibg          | PROMOTER               | 1.949                                                        | 1.732                          | 406.22             | 703.63             | 3.376                          | 336.20             | 1134.90            |
| A_68_P30371091 | chr15:80086279-80086325                           | NM_009716:689      | Atf4          | INSIDE                 | 1.948                                                        | 3.218                          | 1720.78            | 5537.99            | 6.270                          | 1305.60            | 8185.62            |
| A_68_P24060833 | chr5:124803880-124803924                          | NM_013812:735      | Cdk2ap1       | INSIDE                 | 1.948                                                        | 8.285                          | 867.65             | 7188.25            | 16.135                         | 691.74             | 11161.30           |
| A_68_P29330297 | chr13:112515612-112515656                         | NM_172593:39249    | Mier3         | DOWNSTREAM             | 1.948                                                        | 3.136                          | 4485.94            | 14066.93           | 6.108                          | 3426.27            | 20927.12           |
| A_68_P32464061 | chrX:70918592-70918636                            | NM_001142809:143   | Slc6a8        | INSIDE                 | 1.948                                                        | 4.473                          | 1953.12            | 8735.75            | 8.713                          | 1190.32            | 10371.57           |
| A_68_P31147009 | chr17:32924787-32924831                           | NM_172458:424      | Zfp871        | INSIDE                 | 1.948                                                        | 4.509                          | 5798.67            | 26143.80           | 8.782                          | 5006.12            | 43964.92           |
| A_68_P25715145 | chr8:24268305-24268349                            | NM_029002:4584     | Nkx6-3        | INSIDE                 | 1.947                                                        | 5.658                          | 1617.56            | 9152.92            | 11.019                         | 1197.01            | 13189.99           |
| A_68_P32260286 | chrX:11658874-11658919                            | NM_029510:-1217    | Bcor          | PROMOTER               | 1.946                                                        | 2.868                          | 401.28             | 1150.87            | 5.582                          | 234.46             | 1308.67            |
| A_68_P29639452 | chr14:60216844-60216888                           | NM_001168535-70    | Cdadc1        | PROMOTER               | 1.946                                                        | 9.593                          | 6488.31            | 62244.12           | 18.664                         | 3827.68            | 71440.31           |
| A_68_P20192816 | chr1:44204826-44204870                            | NM_011729:260      | Ercs5         | INSIDE                 | 1.946                                                        | 6.459                          | 1824.46            | 11783.62           | 12.569                         | 1452.81            | 18260.66           |
| A_68_P30686476 | chr16:38522756-38522801                           | NM_024273:-31      | 4930455C21Rik | PROMOTER               | 1.945                                                        | 6.413                          | 5617.05            | 36021.49           | 12.474                         | 3776.73            | 47112.65           |
| A_68_P25508222 | chr7:135079466-135079510                          | NM_001081374:10751 | Prss36        | INSIDE                 | 1.945                                                        | 3.919                          | 2482.62            | 9729.37            | 7.622                          | 1728.10            | 13170.75           |
| A_68_P28119629 | chr11:109472837-109472881                         | NM_145940:-155     | Wipi1         | PROMOTER               | 1.945                                                        | 2.160                          | 5773.50            | 12469.26           | 4.201                          | 4146.90            | 17421.64           |
| A_68_P28177063 | chr11:119161761-119161805                         | NM_138669:-425     | Eif4a3        | PROMOTER               | 1.944                                                        | 7.417                          | 3705.01            | 27478.19           | 14.417                         | 2789.51            | 40215.82           |
| A_68_P21843420 | chr2:168591529-168591573                          | NM_175303:1151     | Sall4         | INSIDE                 | 1.944                                                        | 2.326                          | 400.24             | 930.99             | 4.522                          | 339.93             | 1537.30            |
| A_68_P23701554 | chr5:53982361-53982405                            | NM_001080927:570   | Rbpj          | INSIDE                 | 1.943                                                        | 2.359                          | 2601.07            | 6135.06            | 4.584                          | 2146.76            | 9839.79            |
| A_68_P31921054 | chr19:4101079-4101123                             | NM_008851:479      | Pitpnm1       | INSIDE                 | 1.942                                                        | 3.118                          | 795.68             | 2480.76            | 6.056                          | 677.00             | 4099.75            |
| A_68_P21622283 | chr2:128792891-128792935                          | NM_178404:-225     | Zc3h6         | PROMOTER               | 1.942                                                        | 7.387                          | 16791.77           | 124034.50          | 14.346                         | 11192.29           | 160559.10          |
| A_68_P27842896 | chr11:60231205-60231249                           | NM_025757:580      | 4933439F18Rik | INSIDE                 | 1.941                                                        | 6.392                          | 6265.28            | 40045.30           | 12.409                         | 5241.96            | 65047.20           |
| A_68_P24786758 | chr6:118369210-118369254                          | NM_194339:203      | Bms1          | INSIDE                 | 1.941                                                        | 1.975                          | 2909.05            | 5744.70            | 3.833                          | 2374.51            | 9101.42            |
| A_68_P26983892 | chr10:19653936-19653980                           | NM_008580:-373     | Map3k5        | PROMOTER               | 1.941                                                        | 2.801                          | 2266.02            | 6346.81            | 5.436                          | 1777.92            | 9664.64            |
| A_68_P26041379 | chr8:91045377-91045421                            | NM_001163660-6133  | Nkd1          | PROMOTER               | 1.941                                                        | 4.503                          | 5556.83            | 25021.48           | 8.741                          | 4103.47            | 35867.01           |
| A_68_P20506810 | chr1:108069429-108069473                          | NM_133821:1005     | Phlpp1        | PROMOTER               | 1.941                                                        | 3.369                          | 2493.42            | 8399.51            | 6.540                          | 2097.84            | 13719.55           |
| A_68_P27185081 | chr10:61732662-61732706                           | NM_001146100:70485 | Hk1           | INSIDE                 | 1.940                                                        | 4.623                          | 1350.81            | 6244.16            | 8.967                          | 1020.86            | 9154.55            |
| A_68_P24086564 | chr5:129526514-129526558                          | NM_009391:506      | Ran           | INSIDE                 | 1.940                                                        | 3.942                          | 1831.96            | 7220.91            | 7.645                          | 1437.02            | 10986.09           |
| A_68_P30544459 | chr16:10785615-10785659                           | NM_009896:-7       | Socs1         | PROMOTER               | 1.940                                                        | 4.714                          | 4002.87            | 18868.14           | 9.143                          | 3241.30            | 29633.88           |

| ProbeName      | Target position of probe on CpG island microarray | TargetID           | GeneSymbol    | CpG island Description | Ratio of relative methylation (TiO <sub>2</sub> -NP/Vehicle) | Sham group                     |                    |                    | TiO <sub>2</sub> -H group      |                    |                    |
|----------------|---------------------------------------------------|--------------------|---------------|------------------------|--------------------------------------------------------------|--------------------------------|--------------------|--------------------|--------------------------------|--------------------|--------------------|
|                |                                                   |                    |               |                        |                                                              | Relative methylation (Cy5/Cy3) | Cy3 signal (Input) | Cy5 signal (MeDIP) | Relative methylation (Cy5/Cy3) | Cy3 signal (Input) | Cy5 signal (MeDIP) |
| A_68_P29605230 | chr14:52816435-52816479                           | NM_033618:458      | Supt16h       | INSIDE                 | 1.940                                                        | 4.812                          | 2932.18            | 14109.05           | 9.334                          | 2379.69            | 22211.42           |
| A_68_P30114905 | chr15:31461133-31461177                           | NM_172606:-362     | Marchf6       | PROMOTER               | 1.939                                                        | 1.837                          | 568.10             | 1043.48            | 3.561                          | 476.87             | 1698.37            |
| A_68_P28726319 | chr12:109416700-109416744                         | NM_028262:772      | Setd3         | INSIDE                 | 1.939                                                        | 4.260                          | 1042.01            | 4439.33            | 8.260                          | 798.11             | 6592.16            |
| A_68_P20267395 | chr1:60155522-60155566                            | NM_001199060:-200  | Wdr12         | PROMOTER               | 1.939                                                        | 3.578                          | 1891.30            | 6767.76            | 6.938                          | 1500.30            | 10409.78           |
| A_68_P27534905 | chr10:126703422-126703466                         | NM_001190453:127   | Detn2         | INSIDE                 | 1.938                                                        | 3.315                          | 3380.69            | 11207.19           | 6.425                          | 2486.22            | 15973.56           |
| A_68_P26352003 | chr9:22272492-22272536                            | NM_018739:286      | Rp9           | INSIDE                 | 1.937                                                        | 6.711                          | 2403.58            | 16130.31           | 13.000                         | 1977.00            | 25701.63           |
| A_68_P25357073 | chr7:105804516-105804560                          | NM_172280:541      | 2210018M11Rik | INSIDE                 | 1.936                                                        | 5.040                          | 31781.32           | 160178.50          | 9.757                          | 23016.13           | 224567.40          |
| A_68_P28123546 | chr11:110199057-110199101                         | NM_147219:-48      | Abca5         | PROMOTER               | 1.936                                                        | 6.585                          | 5276.42            | 34744.38           | 12.751                         | 3677.97            | 46899.50           |
| A_68_P31119196 | chr17:28046558-28046602                           | NM_181413:296      | Anks1         | INSIDE                 | 1.936                                                        | 1.807                          | 794.26             | 1435.62            | 3.500                          | 648.57             | 2270.05            |
| A_68_P32144718 | chr19:46647649-46647693                           | NM_019718:-95      | Ari3          | DIVERGENT_PROMOTER     | 1.936                                                        | 5.303                          | 2710.10            | 14370.72           | 10.264                         | 2159.84            | 22168.29           |
| A_68_P29140001 | chr13:73605046-73605090                           | NM_145376:238      | Lpcat1        | INSIDE                 | 1.936                                                        | 4.602                          | 5042.49            | 23207.43           | 8.909                          | 3905.21            | 34793.18           |
| A_68_P24591144 | chr6:83005100-83005144                            | NM_007517:476      | Aup1          | INSIDE                 | 1.935                                                        | 1.746                          | 1460.28            | 2549.64            | 3.378                          | 1153.78            | 3897.89            |
| A_68_P31117117 | chr17:27694485-27694529                           | NM_001166476:909   | Hmgal-rs1     | INSIDE                 | 1.935                                                        | 3.854                          | 4656.86            | 17945.86           | 7.456                          | 3396.56            | 25324.85           |
| A_68_P29309087 | chr13:108834557-108834601                         | NM_001048250:-89   | 2810008M24Rik | PROMOTER               | 1.934                                                        | 4.845                          | 3948.98            | 19133.40           | 9.369                          | 3266.40            | 30603.79           |
| A_68_P24482547 | chr6:58590413-58590457                            | NM_011920:43769    | Abcg2         | INSIDE                 | 1.934                                                        | 4.525                          | 2139.50            | 9681.96            | 8.751                          | 1636.83            | 14324.60           |
| A_68_P31208112 | chr17:46787505-46787549                           | NM_025611:240      | Cul7          | INSIDE                 | 1.934                                                        | 4.597                          | 1458.98            | 6707.18            | 8.893                          | 1174.54            | 10445.09           |
| A_68_P30361559 | chr15:78502925-78502969                           | NM_183141:45597    | Elfn2         | INSIDE                 | 1.934                                                        | 7.718                          | 1295.22            | 9996.63            | 14.929                         | 1026.00            | 15316.62           |
| A_68_P25609917 | chr7:152082446-152082490                          | NM_008003:32       | Fgf15         | INSIDE                 | 1.934                                                        | 2.354                          | 2711.42            | 6383.42            | 4.554                          | 2263.15            | 10306.32           |
| A_68_P31236178 | chr17:51952223-51952267                           | NM_001163630:-865  | Satb1         | PROMOTER               | 1.934                                                        | 4.659                          | 2674.30            | 12459.88           | 9.009                          | 2114.51            | 19049.22           |
| A_68_P25086963 | chr7:51608090-51608134                            | NM_001034115:42479 | Shank1        | INSIDE                 | 1.934                                                        | 1.856                          | 483.92             | 897.95             | 3.589                          | 416.06             | 1493.20            |
| A_68_P25947613 | chr8:72178336-72178380                            | NM_001177527:-96   | Zfp964        | PROMOTER               | 1.934                                                        | 5.353                          | 2590.06            | 13863.49           | 10.354                         | 1969.80            | 20395.55           |
| A_68_P30160398 | chr15:40486792-40486836                           | NM_011766:227      | Zfpm2         | INSIDE                 | 1.934                                                        | 4.138                          | 7704.09            | 31875.86           | 8.003                          | 5311.51            | 42509.08           |
| A_68_P22376195 | chr3:101408231-101408275                          | NM_144900:328      | Atp1a1        | INSIDE                 | 1.933                                                        | 5.227                          | 2297.12            | 12008.18           | 10.104                         | 1986.01            | 20065.78           |
| A_68_P26808316 | chr9:107302358-107302402                          | NM_001174047:170   | Caena2d2      | INSIDE                 | 1.933                                                        | 3.324                          | 3446.50            | 11455.10           | 6.425                          | 2700.40            | 17350.81           |
| A_68_P26591015 | chr9:65917041-65917085                            | NM_001025612:476   | Snx22         | INSIDE                 | 1.933                                                        | 3.673                          | 1247.31            | 4581.80            | 7.101                          | 1043.81            | 7412.32            |
| A_68_P25408016 | chr7:116582357-116582401                          | NM_054103:189      | Stk33         | INSIDE                 | 1.933                                                        | 3.287                          | 1844.54            | 6063.05            | 6.353                          | 1448.65            | 9202.64            |
| A_68_P28183963 | chr11:120210170-120210214                         | NR_038126:201      | 0610009L18Rik | INSIDE                 | 1.932                                                        | 3.213                          | 1826.02            | 5866.26            | 6.205                          | 1558.40            | 9670.64            |
| A_68_P27566544 | chr11:5965149-5965193                             | NM_001174053:581   | Camk2b        | INSIDE                 | 1.932                                                        | 3.324                          | 2280.29            | 7579.09            | 6.420                          | 11533.69           | 11533.69           |
| A_68_P27091229 | chr10:41530226-41530270                           | NM_001162908:-131  | Sesn1         | DIVERGENT_PROMOTER     | 1.930                                                        | 4.951                          | 3065.18            | 15175.30           | 9.557                          | 2488.78            | 23786.35           |
| A_68_P21752521 | chr2:152857720-152857764                          | NM_001011732:155   | Xkr7          | INSIDE                 | 1.930                                                        | 4.795                          | 3267.73            | 15669.96           | 9.254                          | 2596.29            | 24027.08           |
| A_68_P28291023 | chr12:25365989-25366033                           | NM_001004455:650   | Cys1          | INSIDE                 | 1.929                                                        | 13.581                         | 9472.94            | 128648.20          | 26.192                         | 5382.13            | 140967.50          |
| A_68_P28457808 | chr12:57713134-57713178                           | NM_008701:1115     | Nkx2-9        | INSIDE                 | 1.929                                                        | 4.516                          | 1026.23            | 4634.92            | 8.713                          | 885.78             | 7718.13            |
| A_68_P30646578 | chr16:31275334-31275378                           | NM_025800:7        | Ppp1r2        | INSIDE                 | 1.929                                                        | 3.705                          | 2474.18            | 9166.92            | 7.148                          | 2077.06            | 14846.63           |
| A_68_P30349758 | chr15:76490310-76490354                           | NM_019396:159      | Cyhr1         | INSIDE                 | 1.928                                                        | 3.640                          | 4666.59            | 16984.62           | 7.018                          | 3324.48            | 23331.03           |
| A_68_P27765093 | chr11:45758539-45758583                           | NM_028185:-123     | Lsm11         | PROMOTER               | 1.928                                                        | 3.590                          | 3657.32            | 13130.18           | 6.923                          | 2701.76            | 18704.49           |
| A_68_P28195719 | chr12:3572230-3572274                             | NM_001162465:-138  | Dtnb          | PROMOTER               | 1.927                                                        | 2.025                          | 1262.01            | 2555.32            | 3.901                          | 913.73             | 3564.66            |
| A_68_P25392116 | chr7:112548270-112548314                          | NM_199009:233      | Fam160a2      | INSIDE                 | 1.927                                                        | 3.135                          | 3303.29            | 10354.85           | 6.040                          | 2514.41            | 15186.65           |
| A_68_P32571132 | chrX:100129205-100129249                          | NR_026596:336      | Gm5126        | INSIDE                 | 1.927                                                        | 2.774                          | 1584.24            | 4393.93            | 5.345                          | 859.88             | 4595.98            |
| A_68_P24863969 | chr6:134820135-134820179                          | NM_001167697:17721 | Gpr19         | INSIDE                 | 1.927                                                        | 4.853                          | 539.59             | 2618.65            | 9.351                          | 411.50             | 3847.75            |
| A_68_P27796195 | chr11:5167177-51671821                            | NM_199299:-815     | Phf15         | PROMOTER               | 1.927                                                        | 3.621                          | 11034.72           | 39960.52           | 6.977                          | 7949.07            | 55458.77           |
| A_68_P22149943 | chr3:54611747-54611791                            | NM_133231:-55      | Rfxap         | PROMOTER               | 1.927                                                        | 4.905                          | 1112.94            | 5459.44            | 9.453                          | 945.98             | 8942.71            |
| A_68_P30390278 | chr15:83555204-83555248                           | NM_022723:225      | Scube1        | INSIDE                 | 1.927                                                        | 4.462                          | 1759.53            | 7850.47            | 8.596                          | 1610.50            | 13843.26           |
| A_68_P20005810 | chr1:4483711-4483755                              | NM_011441:2762     | Sox17         | INSIDE                 | 1.927                                                        | 4.121                          | 693.64             | 2858.49            | 7.941                          | 700.21             | 5560.40            |
| A_68_P27896951 | chr11:69579684-69579728                           | NM_029348:293      | Zbtb4         | INSIDE                 | 1.927                                                        | 6.578                          | 853.34             | 5613.07            | 12.676                         | 665.38             | 8434.45            |
| A_68_P24973956 | chr7:13563487-13563531                            | NM_001168561:312   | Zfp446        | INSIDE                 | 1.927                                                        | 4.269                          | 926.05             | 3952.94            | 8.225                          | 813.97             | 6694.80            |
| A_68_P32488667 | chrX:78316560-78316604                            | NM_138751:600      | Tmem47        | INSIDE                 | 1.926                                                        | 4.390                          | 5758.30            | 25281.21           | 8.457                          | 3130.92            | 26478.88           |
| A_68_P23195047 | chr4:107889859-107889903                          | NM_001167936:647   | Zyg11a        | INSIDE                 | 1.926                                                        | 5.752                          | 19495.88           | 112147.10          | 11.079                         | 13845.63           | 153397.70          |
| A_68_P30459959 | chr15:95620940-95620984                           | NM_175344:-311     | Ano6          | PROMOTER               | 1.925                                                        | 3.162                          | 2819.28            | 8914.46            | 6.086                          | 2292.31            | 13950.27           |
| A_68_P28175418 | chr11:118898955-118898999                         | NM_013926:3251     | Cbx8          | DOWNSTREAM             | 1.925                                                        | 5.303                          | 2342.48            | 12422.04           | 10.206                         | 1877.46            | 19160.97           |
| A_68_P30183902 | chr15:44945966-44946010                           | NM_026200:492      | Kenv1         | INSIDE                 | 1.925                                                        | 7.547                          | 2060.05            | 15548.16           | 14.527                         | 1203.61            | 17485.23           |
| A_68_P29330800 | chr13:112598036-112598080                         | NM_011945:1133     | Map3k1        | INSIDE                 | 1.925                                                        | 3.844                          | 1210.59            | 4652.97            | 7.400                          | 1025.67            | 7589.61            |

| ProbeName      | Target position of probe on CpG island microarray | TargetID            | GeneSymbol    | CpG island Description | Ratio of relative methylation (TiO <sub>2</sub> -NP/Vehicle) | Sham group                     |                    |                    | TiO <sub>2</sub> -H group      |                    |                    |
|----------------|---------------------------------------------------|---------------------|---------------|------------------------|--------------------------------------------------------------|--------------------------------|--------------------|--------------------|--------------------------------|--------------------|--------------------|
|                |                                                   |                     |               |                        |                                                              | Relative methylation (Cy5/Cy3) | Cy3 signal (Input) | Cy5 signal (MeDIP) | Relative methylation (Cy5/Cy3) | Cy3 signal (Input) | Cy5 signal (MeDIP) |
| A_68_P31258630 | chr17:56969214-56969258                           | NM_009056:1195      | Rfx2          | INSIDE                 | 1.925                                                        | 6.313                          | 5662.42            | 35747.04           | 12.150                         | 4694.45            | 57039.64           |
| A_68_P21116393 | chr2:32468028-32468072                            | NM_001025310:5570   | St6galnac6    | INSIDE                 | 1.925                                                        | 8.406                          | 3661.88            | 30782.19           | 16.185                         | 2404.68            | 38920.51           |
| A_68_P23588493 | chr5:33721117-33721161                            | NM_001081101:-206   | 4933407H18Rik | PROMOTER               | 1.924                                                        | 5.062                          | 8181.42            | 41417.93           | 9.741                          | 5614.39            | 54690.28           |
| A_68_P22659834 | chr3:153607495-153607539                          | NM_007382:-120      | Acadm         | PROMOTER               | 1.924                                                        | 3.919                          | 2766.09            | 10839.68           | 7.540                          | 2240.55            | 16892.71           |
| A_68_P29752204 | chr14:79987400-79987444                           | NM_026474:-75       | Sugt1         | PROMOTER               | 1.924                                                        | 4.763                          | 3302.53            | 15728.79           | 9.163                          | 2623.06            | 24035.36           |
| A_68_P24133861 | chr5:139626021-139626065                          | NM_001081265:-134   | Heatr2        | PROMOTER               | 1.923                                                        | 5.203                          | 17869.78           | 92974.62           | 10.007                         | 11113.70           | 111213.60          |
| A_68_P25005398 | chr7:25318769-25318814                            | NM_153134:3125      | Irgq          | INSIDE                 | 1.923                                                        | 3.356                          | 458.84             | 1539.90            | 6.454                          | 324.51             | 2094.37            |
| A_68_P27648126 | chr11:23795318-23795362                           | NM_172555:-70       | Papolg        | PROMOTER               | 1.923                                                        | 3.254                          | 5338.37            | 17370.64           | 6.258                          | 3939.80            | 24656.64           |
| A_68_P30345853 | chr15:75900100-75900144                           | NM_134089:38        | Scrib         | INSIDE                 | 1.923                                                        | 4.663                          | 3776.94            | 17610.21           | 8.966                          | 3372.04            | 30235.25           |
| A_68_P21782539 | chr2:158187061-158187105                          | NR_015463:163       | 9430008C03Rik | INSIDE                 | 1.922                                                        | 4.489                          | 4847.02            | 21757.79           | 8.630                          | 4715.69            | 40694.87           |
| A_68_P28752186 | chr12:113977208-113977252                         | NM_001024602:16846  | AW555464      | INSIDE                 | 1.922                                                        | 4.566                          | 3478.97            | 15886.58           | 8.777                          | 2592.08            | 22749.48           |
| A_68_P28153096 | chr11:115229081-115229125                         | NM_175454:-69       | C630004H02Rik | PROMOTER               | 1.922                                                        | 6.389                          | 5115.22            | 32680.12           | 12.279                         | 3916.94            | 48094.92           |
| A_68_P24683080 | chr6:98978547-98978591                            | NM_001197322:-276   | Foxp1         | PROMOTER               | 1.922                                                        | 1.899                          | 1475.64            | 2802.18            | 3.650                          | 1327.61            | 4846.05            |
| A_68_P27932457 | chr11:76308492-76308536                           | NM_198018:14407     | Abr           | INSIDE                 | 1.921                                                        | 9.569                          | 21667.79           | 207339.50          | 18.381                         | 18186.63           | 334294.90          |
| A_68_P26132026 | chr8:107695072-107695119                          | NM_001161456:522    | Ctbf          | INSIDE                 | 1.921                                                        | 1.830                          | 668.55             | 1223.14            | 3.515                          | 622.51             | 2188.07            |
| A_68_P32573186 | chrX:100688845-100688889                          | NR_015508:-48       | Enox          | PROMOTER               | 1.921                                                        | 6.156                          | 1849.84            | 11386.70           | 11.827                         | 1849.84            | 16248.66           |
| A_68_P24942897 | chr6:148894399-148894443                          | NM_019643:534       | Fam60a        | INSIDE                 | 1.921                                                        | 4.150                          | 1979.80            | 8216.13            | 7.973                          | 1511.82            | 12053.87           |
| A_68_P31201735 | chr17:45686486-45686530                           | NM_001013749:118    | Tmem151b      | INSIDE                 | 1.921                                                        | 4.523                          | 4033.96            | 18243.61           | 8.688                          | 2866.15            | 24900.98           |
| A_68_P28225578 | chr12:8980743-8980787                             | NM_001159527:-42    | Wdr35         | PROMOTER               | 1.921                                                        | 2.640                          | 7446.62            | 19660.79           | 5.071                          | 5556.74            | 28180.03           |
| A_68_P29975444 | chr15:3533363-3533409                             | NM_010284:-156      | Ghr           | PROMOTER               | 1.920                                                        | 7.272                          | 941.81             | 6848.65            | 13.961                         | 869.39             | 12137.41           |
| A_68_P23573590 | chr5:30925082-30925126                            | NM_010608:34562     | Kenk3         | INSIDE                 | 1.920                                                        | 5.787                          | 2350.06            | 13599.97           | 11.110                         | 1736.33            | 19291.40           |
| A_68_P20282811 | chr1:62749708-62749752                            | NM_001077406:-160   | Nrp2          | PROMOTER               | 1.920                                                        | 8.010                          | 3164.47            | 25348.92           | 15.380                         | 2494.48            | 38364.67           |
| A_68_P24428260 | chr6:48552305-48552349                            | NM_001079901:8445   | Repin1        | DOWNSTREAM             | 1.920                                                        | 5.777                          | 379.35             | 2191.66            | 11.091                         | 284.25             | 3152.55            |
| A_68_P27286394 | chr10:80391549-80391593                           | NM_008655:-1265     | Gadd45b       | PROMOTER               | 1.918                                                        | 1.815                          | 1699.65            | 3085.00            | 3.482                          | 1370.18            | 4771.14            |
| A_68_P28164254 | chr11:117151837-117151881                         | NM_001113487:24299  | Septin9       | INSIDE                 | 1.918                                                        | 4.704                          | 4337.00            | 20399.80           | 9.019                          | 3424.73            | 30888.83           |
| A_68_P28739824 | chr12:111934703-111934747                         | NM_010480:-119      | Hsp90aa1      | PROMOTER               | 1.917                                                        | 11.944                         | 1915.98            | 22884.25           | 22.896                         | 1402.99            | 32122.28           |
| A_68_P24052813 | chr5:123350619-123350663                          | NM_013910:-281      | Kdm2b         | PROMOTER               | 1.917                                                        | 2.640                          | 545.58             | 1440.33            | 5.060                          | 392.77             | 1987.24            |
| A_68_P23757989 | chr5:66155461-66155505                            | NM_001024917:723    | N4bp2         | INSIDE                 | 1.917                                                        | 2.979                          | 1575.15            | 4692.02            | 5.709                          | 1233.33            | 7041.59            |
| A_68_P25445817 | chr7:123177303-123177347                          | NM_001025560:-2763  | Sox6          | PROMOTER               | 1.917                                                        | 3.509                          | 3173.69            | 11135.04           | 6.726                          | 2390.20            | 16075.83           |
| A_68_P27289055 | chr10:80813338-80813382                           | NM_001163166:-158   | Hmg20b        | DIVERGENT_PROMOTER     | 1.916                                                        | 3.014                          | 4739.46            | 14285.52           | 5.774                          | 3859.24            | 22283.48           |
| A_68_P30395524 | chr15:84388079-84388123                           | NM_177630:153       | Ldoc1         | INSIDE                 | 1.916                                                        | 7.935                          | 2483.85            | 19709.22           | 15.205                         | 2070.29            | 31478.86           |
| A_68_P20148355 | chr1:36502065-36502109                            | NM_001013374:-2     | Lman21        | PROMOTER               | 1.916                                                        | 2.963                          | 7704.43            | 22829.15           | 5.678                          | 5809.89            | 32991.37           |
| A_68_P24132971 | chr5:139470887-139470931                          | NM_008808:-1        | Pdgfra        | PROMOTER               | 1.916                                                        | 6.049                          | 10464.92           | 63300.49           | 11.592                         | 10109.40           | 117188.10          |
| A_68_P21774858 | chr2:156866344-156866388                          | NM_001164663:38635  | 9830001H06Rik | INSIDE                 | 1.915                                                        | 3.175                          | 3202.56            | 10167.64           | 6.079                          | 2541.60            | 15449.53           |
| A_68_P24205536 | chr6:4550713-4550757                              | NM_145398:-331      | Casd1         | PROMOTER               | 1.915                                                        | 5.905                          | 4018.61            | 23729.76           | 11.305                         | 3300.47            | 37312.12           |
| A_68_P25565202 | chr7:144505325-144505370                          | NM_001113414:781    | Ebf3          | INSIDE                 | 1.915                                                        | 5.902                          | 4572.39            | 26987.78           | 11.301                         | 3496.84            | 39517.37           |
| A_68_P32281782 | chrX:17739949-17739993                            | NM_009483:178       | Kdm6a         | INSIDE                 | 1.915                                                        | 1.913                          | 2267.29            | 4337.15            | 3.663                          | 1308.27            | 4792.41            |
| A_68_P21204312 | chr2:49642923-49642967                            | NM_027990:-261      | Lypd6b        | PROMOTER               | 1.915                                                        | 2.123                          | 464.44             | 986.20             | 4.067                          | 405.43             | 1648.96            |
| A_68_P32582402 | chrX:103206930-103206974                          | NM_001190409:286    | Magt1         | INSIDE                 | 1.915                                                        | 1.775                          | 471.25             | 836.39             | 3.398                          | 285.08             | 968.83             |
| A_68_P28107262 | chr11:107332069-107332113                         | NM_145823:-56       | Pitpnc1       | DIVERGENT_PROMOTER     | 1.915                                                        | 11.985                         | 2125.28            | 25472.22           | 22.948                         | 1793.44            | 41155.20           |
| A_68_P26529571 | chr9:54996925-54996969                            | NM_180600:-229      | Ube2q2        | PROMOTER               | 1.914                                                        | 7.210                          | 1010.45            | 7285.18            | 13.799                         | 790.60             | 10909.70           |
| A_68_P25065443 | chr7:38893032-38893076                            | NM_007633:-545      | Cenc1         | PROMOTER               | 1.913                                                        | 1.928                          | 2996.29            | 5777.92            | 3.690                          | 2226.80            | 8216.66            |
| A_68_P21102300 | chr2:30141879-30141923                            | NM_177648:-26       | Dolk          | DIVERGENT_PROMOTER     | 1.913                                                        | 2.441                          | 2439.73            | 5955.30            | 4.670                          | 1879.60            | 8778.17            |
| A_68_P23814358 | chr5:76569347-76569391                            | NM_020611:71        | Srd5a3        | INSIDE                 | 1.913                                                        | 3.279                          | 1314.92            | 4311.92            | 6.273                          | 972.42             | 6100.40            |
| A_68_P23190148 | chr4:107040619-107040663                          | NM_028355:252       | Tmem48        | INSIDE                 | 1.913                                                        | 8.198                          | 1328.94            | 10894.72           | 15.684                         | 1001.80            | 15712.00           |
| A_68_P31621446 | chr18:36177796-36177840                           | NM_001167891:178996 | Nrg2          | INSIDE                 | 1.912                                                        | 6.614                          | 1194.95            | 7903.79            | 12.650                         | 1049.81            | 13279.96           |
| A_68_P24057004 | chr5:124133945-124133989                          | NM_019765:334       | Clip1         | INSIDE                 | 1.911                                                        | 2.160                          | 864.01             | 1865.97            | 4.126                          | 813.86             | 3358.04            |
| A_68_P31864634 | chr18:80666119-80666163                           | NM_026295:266       | Ctdp1         | INSIDE                 | 1.911                                                        | 4.138                          | 713.39             | 2952.12            | 7.909                          | 717.95             | 5678.08            |
| A_68_P23320471 | chr4:133556862-133556906                          | NM_026144:-105      | Dhdds         | PROMOTER               | 1.911                                                        | 6.695                          | 713.05             | 4773.77            | 12.792                         | 604.67             | 7734.84            |
| A_68_P24908780 | chr6:143116314-143116358                          | NM_029250:587       | Etnk1         | INSIDE                 | 1.911                                                        | 4.120                          | 8609.83            | 35470.89           | 7.873                          | 6271.76            | 49378.43           |
| A_68_P23681258 | chr5:50449746-50449790                            | NM_133911:467       | Gpr125        | INSIDE                 | 1.910                                                        | 2.700                          | 4056.12            | 10949.92           | 5.155                          | 3147.75            | 16226.96           |

| ProbeName      | Target position of probe on CpG island microarray | TargetID               | GeneSymbol    | CpG island Description | Ratio of relative methylation (TiO <sub>2</sub> -NP/Vehicle) | Sham group                     |                    |                    | TiO <sub>2</sub> -H group      |                    |                    |
|----------------|---------------------------------------------------|------------------------|---------------|------------------------|--------------------------------------------------------------|--------------------------------|--------------------|--------------------|--------------------------------|--------------------|--------------------|
|                |                                                   |                        |               |                        |                                                              | Relative methylation (Cy5/Cy3) | Cy3 signal (Input) | Cy5 signal (MeDIP) | Relative methylation (Cy5/Cy3) | Cy3 signal (Input) | Cy5 signal (MeDIP) |
| A_68_P21536555 | chr2:113598914-113598958                          | NM_011824-131          | Grem1         | PROMOTER               | 1.910                                                        | 6.201                          | 10172.87           | 63086.12           | 11.843                         | 7495.12            | 88766.02           |
| A_68_P28671841 | chr12:99975831-99975875                           | NM_001146199-237       | Ptpn21        | DIVERGENT_PROMOTER     | 1.910                                                        | 3.169                          | 3504.26            | 11104.89           | 6.054                          | 2752.12            | 16661.96           |
| A_68_P21285107 | chr2:65077163-65077207                            | NM_027225-501          | Cobll1        | PROMOTER               | 1.909                                                        | 4.523                          | 6122.86            | 27694.30           | 8.633                          | 4521.21            | 39031.95           |
| A_68_P23657737 | chr5:46030747-46030791                            | NM_021416-28           | Fam184b       | PROMOTER               | 1.909                                                        | 1.799                          | 1547.18            | 2783.68            | 3.435                          | 1287.38            | 4422.59            |
| A_68_P32743933 | chrX:147481461-147481505                          | NM_008001-293          | Fgd1          | PROMOTER               | 1.909                                                        | 4.057                          | 3063.49            | 12429.23           | 7.745                          | 1840.37            | 14252.89           |
| A_68_P23296219 | chr4:129012748-129012792                          | NM_009030-156          | Rbbp4         | DIVERGENT_PROMOTER     | 1.909                                                        | 4.649                          | 4131.98            | 19209.22           | 8.876                          | 3331.75            | 29571.28           |
| A_68_P30499546 | chr15:102577711-102577755                         |                        |               | Unknown                | 1.909                                                        | 1.480                          | 2355.57            | 3485.49            | 2.824                          | 1811.15            | 5114.82            |
| A_68_P27784450 | chr11:49525550-49525594                           | NM_212484-640          | Cnot6         | INSIDE                 | 1.908                                                        | 2.634                          | 3975.65            | 10469.93           | 5.025                          | 3106.29            | 15610.64           |
| A_68_P26983894 | chr10:19654073-19654117                           | NM_008580-237          | Map3k5        | PROMOTER               | 1.908                                                        | 4.715                          | 1137.39            | 5362.66            | 8.995                          | 869.16             | 7818.51            |
| A_68_P28726327 | chr12:109417619-109417664                         | NM_028262-147          | Setd3         | DIVERGENT_PROMOTER     | 1.908                                                        | 4.603                          | 1903.06            | 8759.66            | 8.782                          | 1566.38            | 13755.89           |
| A_68_P26880499 | chr9:120842203-120842247                          | NM_007614-293          | Cttnb1        | PROMOTER               | 1.907                                                        | 3.489                          | 2486.61            | 8675.34            | 6.652                          | 1765.98            | 11746.72           |
| A_68_P25644704 | chr8:9771350-9771394                              | NM_173446-349          | Fam155a       | PROMOTER               | 1.907                                                        | 12.194                         | 23543.03           | 287086.60          | 23.250                         | 14771.44           | 343435.70          |
| A_68_P25266552 | chr7:87547168-87547212                            | NM_011046-458          | Furin         | INSIDE                 | 1.907                                                        | 4.974                          | 1206.48            | 6001.21            | 9.487                          | 1020.22            | 9678.73            |
| A_68_P30243544 | chr15:57525714-57525758                           | NM_199449-485          | Zhx2          | PROMOTER               | 1.907                                                        | 2.755                          | 1625.86            | 4478.68            | 5.253                          | 1339.99            | 7039.37            |
| A_68_P29049835 | chr13:54605357-54605401                           | NM_176987-213          | 4732471D19Rik | INSIDE                 | 1.906                                                        | 4.028                          | 1786.81            | 7197.41            | 7.678                          | 1384.65            | 10630.74           |
| A_68_P23647569 | chr5:44173172-44173216                            | NM_001159963-194       | Fbx15         | INSIDE                 | 1.905                                                        | 5.037                          | 4066.60            | 20482.39           | 9.597                          | 2398.28            | 28208.15           |
| A_68_P23350170 | chr4:138749124-138749168                          | NM_001037761-253       | Capzb         | INSIDE                 | 1.904                                                        | 3.333                          | 401.15             | 1336.85            | 6.346                          | 334.45             | 2122.53            |
| A_68_P27930557 | chr11:76015854-76015898                           | NM_027773-319          | Fam57a        | INSIDE                 | 1.904                                                        | 3.875                          | 1497.57            | 5802.80            | 7.379                          | 1271.09            | 9379.09            |
| A_68_P31162404 | chr17:36221085-36221129                           | NM_008199-88           | H2-B1         | INSIDE                 | 1.904                                                        | 2.502                          | 2933.75            | 7341.23            | 4.765                          | 2115.03            | 10078.02           |
| A_68_P30601918 | chr16:23225193-23225237                           | NM_145933-380          | St6gal1       | INSIDE                 | 1.904                                                        | 2.661                          | 1893.74            | 5038.34            | 5.066                          | 1478.16            | 7487.62            |
| A_68_P32553141 | chrX:96238064-96238108                            | NM_199018-167          | Stard8        | INSIDE                 | 1.904                                                        | 4.549                          | 2633.26            | 11979.79           | 8.662                          | 1594.17            | 13808.89           |
| A_68_P24735989 | chr6:108778919-108778963                          | NM_138677-306          | Edem1         | INSIDE                 | 1.903                                                        | 3.777                          | 394.52             | 1490.21            | 7.189                          | 410.65             | 2952.03            |
| A_68_P27091644 | chr10:41607176-41607220                           | NM_001013370-46        | Sesn1         | PROMOTER               | 1.903                                                        | 6.522                          | 2943.93            | 19199.99           | 12.412                         | 2476.28            | 30734.88           |
| A_68_P30128581 | chr15:34373372-34373416                           | NM_001163485-363       | Rpl30         | DIVERGENT_PROMOTER     | 1.902                                                        | 2.460                          | 2857.63            | 7030.14            | 4.679                          | 2030.46            | 9500.08            |
| A_68_P30380067 | chr15:81688792-81688836                           | NM_020507-58           | Tob2          | PROMOTER               | 1.902                                                        | 4.656                          | 2525.26            | 11757.26           | 8.854                          | 1887.14            | 16709.04           |
| A_68_P29134822 | chr13:72768633-72768679                           | NM_010574-2231         | Irx2          | INSIDE                 | 1.901                                                        | 2.271                          | 4470.84            | 10154.53           | 4.319                          | 3365.33            | 14533.82           |
| A_68_P20456742 | chr1:95532281-95532325                            | NM_021537-2            | Stk25         | INSIDE                 | 1.901                                                        | 5.375                          | 5391.60            | 28979.31           | 10.220                         | 4104.03            | 41941.65           |
| A_68_P30230212 | chr15:54903756-54903800                           | NM_001081288-71        | Taf2          | PROMOTER               | 1.901                                                        | 4.632                          | 1981.73            | 9179.20            | 8.804                          | 1705.00            | 15010.15           |
| A_68_P23608585 | chr5:36924742-36924786                            | NM_133910-282          | Tbc1d14       | INSIDE                 | 1.901                                                        | 2.812                          | 13547.19           | 38091.92           | 5.346                          | 9749.13            | 52114.66           |
| A_68_P32258637 | chrX:11384409-11384453                            |                        |               | Unknown                | 1.901                                                        | 1.417                          | 1543.52            | 2187.58            | 2.694                          | 810.68             | 2183.79            |
| A_68_P24995433 | chr7:20408093-20408137                            | NM_033601-110          | Bcl3          | PROMOTER               | 1.900                                                        | 4.210                          | 710.19             | 2990.18            | 8.001                          | 585.96             | 4688.00            |
| A_68_P27111732 | chr10:45297581-45297625                           | NM_172473-32           | Hace1         | PROMOTER               | 1.900                                                        | 2.556                          | 1049.71            | 2683.25            | 4.857                          | 871.12             | 4231.03            |
| A_68_P29237544 | chr13:95647510-95647554                           | NM_011021-1951         | Otp           | INSIDE                 | 1.900                                                        | 3.442                          | 1352.07            | 4653.63            | 6.541                          | 951.11             | 6220.87            |
| A_68_P27898391 | chr11:69810124-69810168                           | NM_030064-874          | Phf23         | INSIDE                 | 1.900                                                        | 6.188                          | 16696.39           | 103321.70          | 11.758                         | 11612.96           | 136541.00          |
| A_68_P23609090 | chr5:37086922-37086966                            | NM_001081232-264       | D5Erd579e     | INSIDE                 | 1.899                                                        | 4.942                          | 5250.33            | 25945.60           | 9.383                          | 4159.62            | 39028.77           |
| A_68_P28174620 | chr11:118768747-118768791                         | NM_001024931-2118      | Rbfox3        | INSIDE                 | 1.899                                                        | 5.324                          | 5970.48            | 31785.57           | 10.112                         | 4426.10            | 44755.41           |
| A_68_P31659996 | chr18:43367102-43367146                           | NM_178749-226          | Stk32a        | PROMOTER               | 1.899                                                        | 6.224                          | 3351.87            | 20860.38           | 11.820                         | 2474.30            | 29245.91           |
| A_68_P32709174 | chrX:139116023-139116067                          | NM_001199360-224       | Tmem164       | PROMOTER               | 1.899                                                        | 4.862                          | 2349.83            | 11425.20           | 9.232                          | 1450.14            | 13387.17           |
| A_68_P32578104 | chrX:101866109-101866153                          | NM_175358-273          | Zdhhc15       | INSIDE                 | 1.899                                                        | 3.304                          | 4590.08            | 15164.50           | 6.274                          | 2668.97            | 16744.35           |
| A_68_P21762932 | chr2:15471851-15471856                            | NM_026030-69           | Eif2s2        | INSIDE                 | 1.898                                                        | 3.101                          | 2784.28            | 8634.70            | 5.886                          | 2108.86            | 12413.38           |
| A_68_P20506808 | chr1:108069211-108069255                          | NM_133821-787          | Phlpp1        | INSIDE                 | 1.898                                                        | 7.316                          | 1813.92            | 13270.07           | 13.888                         | 1509.26            | 20961.24           |
| A_68_P32234207 | chrX:5977686-5977730                              | NM_001040459-446       | Shroom4       | INSIDE                 | 1.898                                                        | 3.037                          | 992.20             | 3013.76            | 5.764                          | 637.73             | 3675.91            |
| A_68_P24019920 | chr5:117769201-117769245                          | NM_001033311-52        | Vsig10        | PROMOTER               | 1.898                                                        | 1.432                          | 926.32             | 1326.26            | 2.717                          | 833.12             | 2263.95            |
| A_68_P24098738 | chr5:132013832-132013876                          | NM_177047-1004359      | Aut5          | INSIDE                 | 1.897                                                        | 3.105                          | 2416.69            | 7504.06            | 5.891                          | 1923.10            | 11328.58           |
| A_68_P30667506 | chr16:35022484-35022528                           | NM_023587-0            | Ptp1b         | INSIDE                 | 1.897                                                        | 2.685                          | 1062.16            | 2851.96            | 5.094                          | 902.45             | 4597.00            |
| A_68_P22382656 | chr3:102538778-102538822                          | NM_027533-108          | Tspan2        | INSIDE                 | 1.897                                                        | 4.171                          | 9887.21            | 41239.90           | 7.911                          | 7434.75            | 58815.90           |
| A_68_P21117289 | chr2:32612990-32613034                            | NM_152800-222          | Tor2a         | INSIDE                 | 1.896                                                        | 6.493                          | 1602.39            | 10403.93           | 12.309                         | 1213.79            | 14940.74           |
| A_68_P32700327 | chrX:137200260-137200304                          | ENSMUST00000112988:672 |               | INSIDE                 | 1.896                                                        | 2.665                          | 1016.59            | 2709.60            | 5.053                          | 477.49             | 2412.85            |
| A_68_P23222359 | chr4:114597578-114597622                          | NM_015758-1018         | Foxe3         | DOWNSTREAM             | 1.895                                                        | 11.062                         | 1484.95            | 16425.86           | 20.962                         | 1203.20            | 25221.92           |
| A_68_P26538932 | chr9:56712960-56713004                            | NM_139001-72           | Cspg4         | INSIDE                 | 1.894                                                        | 4.386                          | 10522.96           | 46156.43           | 8.309                          | 7877.12            | 65451.70           |
| A_68_P25766300 | chr8:33994475-33994519                            | NM_001177589-66002     | Gm3985        | DOWNSTREAM             | 1.894                                                        | 2.241                          | 608.52             | 1363.70            | 4.244                          | 521.65             | 2213.84            |

| ProbeName      | Target position of probe on CpG island microarray | TargetID            | GeneSymbol     | CpG island Description | Ratio of relative methylation (TiO <sub>2</sub> -NP/Vehicle) | Sham group                     |                    |                    | TiO <sub>2</sub> -H group      |                    |                    |
|----------------|---------------------------------------------------|---------------------|----------------|------------------------|--------------------------------------------------------------|--------------------------------|--------------------|--------------------|--------------------------------|--------------------|--------------------|
|                |                                                   |                     |                |                        |                                                              | Relative methylation (Cy5/Cy3) | Cy3 signal (Input) | Cy5 signal (MeDIP) | Relative methylation (Cy5/Cy3) | Cy3 signal (Input) | Cy5 signal (MeDIP) |
| A_68_P28450733 | chr12:56225550-56225594                           | NM_001100116:58     | 1700047117Rik2 | INSIDE                 | 1.893                                                        | 4.739                          | 1177.94            | 5581.73            | 8.969                          | 972.67             | 8724.30            |
| A_68_P27914258 | chr11:72775141-72775185                           | NM_001163336:492    | Atp2a3         | INSIDE                 | 1.893                                                        | 2.324                          | 1220.11            | 2835.14            | 4.398                          | 1120.16            | 4926.22            |
| A_68_P23361673 | chr4:140581289-140581333                          | NM_172122:28266     | Crocc          | INSIDE                 | 1.893                                                        | 5.666                          | 2665.13            | 15100.28           | 10.727                         | 2182.63            | 23412.04           |
| A_68_P26348962 | chr9:21602957-21603001                            | NM_145611:12        | Kank2          | INSIDE                 | 1.893                                                        | 2.623                          | 1978.53            | 5190.52            | 4.966                          | 1544.30            | 7669.06            |
| A_68_P27283985 | chr10:80024218-80024262                           | NM_025852:65        | Rexo1          | INSIDE                 | 1.893                                                        | 1.853                          | 1490.13            | 2761.57            | 3.509                          | 1217.01            | 4270.00            |
| A_68_P26079748 | chr8:97362202-97362246                            | NM_134141:16        | Ciapin1        | INSIDE                 | 1.892                                                        | 2.871                          | 431.89             | 1240.15            | 5.432                          | 323.32             | 1756.29            |
| A_68_P28732711 | chr12:110692025-110692069                         | NM_001190703:382    | Dlk1           | INSIDE                 | 1.892                                                        | 2.773                          | 11271.12           | 31256.75           | 5.247                          | 7974.42            | 41839.52           |
| A_68_P20636645 | chr1:136884255-136884299                          | NM_001033409:117577 | Lgr6           | INSIDE                 | 1.892                                                        | 14.177                         | 2442.11            | 34620.74           | 26.820                         | 1778.74            | 47705.97           |
| A_68_P22341452 | chr3:94758251-94758295                            | NM_017395:-664      | Rfx5           | PROMOTER               | 1.892                                                        | 1.986                          | 1160.58            | 2305.20            | 3.759                          | 985.55             | 3704.39            |
| A_68_P23442283 | chr4:155452135-155452179                          |                     |                | Unknown                | 1.892                                                        | 3.276                          | 2422.93            | 7938.13            | 6.200                          | 1916.25            | 11880.43           |
| A_68_P21900913 | chr2:179759394-179759438                          | NM_177727:-275      | Lsm14b         | PROMOTER               | 1.891                                                        | 4.621                          | 5053.95            | 23356.44           | 8.741                          | 3956.25            | 34580.53           |
| A_68_P25578901 | chr7:146768634-146768678                          | NR_027857:40        | Nkx6-2         | INSIDE                 | 1.891                                                        | 4.355                          | 4487.96            | 19544.00           | 8.234                          | 3456.28            | 28458.97           |
| A_68_P28039255 | chr11:95375266-95375310                           | NM_130858:591       | Nxph3          | INSIDE                 | 1.891                                                        | 6.571                          | 8238.62            | 54137.48           | 12.429                         | 6016.37            | 74779.02           |
| A_68_P31713385 | chr18:53624187-53624231                           | NM_001033281:9      | Prdm6          | INSIDE                 | 1.891                                                        | 2.311                          | 1897.82            | 4386.30            | 4.371                          | 1358.76            | 5938.95            |
| A_68_P31121831 | chr17:28465275-28465320                           | NM_011287:-118      | Rpl10a         | PROMOTER               | 1.891                                                        | 8.952                          | 1034.42            | 9260.53            | 16.925                         | 734.71             | 12435.11           |
| A_68_P32564024 | chrX:98615209-98615253                            | NM_001177985:23     | Zmym3          | INSIDE                 | 1.891                                                        | 2.856                          | 582.27             | 1662.67            | 5.400                          | 372.25             | 2010.15            |
| A_68_P30246249 | chr15:57966345-57966389                           | NM_027435:271       | Atad2          | INSIDE                 | 1.890                                                        | 8.349                          | 2043.61            | 17062.91           | 15.779                         | 1656.81            | 26143.28           |
| A_68_P29530305 | chr14:35315556-35315600                           | NM_009758:154       | Bmpr1a         | INSIDE                 | 1.890                                                        | 3.798                          | 2069.87            | 7862.13            | 7.178                          | 1766.58            | 12680.11           |
| A_68_P28167547 | chr11:117710471-117710515                         | NM_001012273:-58    | Birc5          | PROMOTER               | 1.889                                                        | 4.570                          | 1254.99            | 5735.76            | 8.632                          | 1037.63            | 8956.98            |
| A_68_P25354355 | chr7:105326695-105326739                          | NM_007602:-13       | Capn5          | PROMOTER               | 1.889                                                        | 3.757                          | 1433.93            | 5386.78            | 7.097                          | 1113.74            | 7904.33            |
| A_68_P24359955 | chr6:35083485-35083529                            | NM_001164412:231    | Cnot4          | INSIDE                 | 1.889                                                        | 3.638                          | 4126.95            | 15015.24           | 6.874                          | 3480.07            | 23921.77           |
| A_68_P30093655 | chr15:27560477-27560521                           | NM_001013792:-50    | Fam105b        | PROMOTER               | 1.889                                                        | 3.790                          | 4711.05            | 17853.99           | 7.158                          | 3397.60            | 24320.69           |
| A_68_P27924667 | chr11:74992384-74992428                           | NM_027136:-96       | Ovea2          | PROMOTER               | 1.889                                                        | 6.221                          | 3563.75            | 22170.42           | 11.753                         | 2485.00            | 29206.57           |
| A_68_P30678526 | chr16:37011868-37011912                           | NM_001159369:19     | Polq           | INSIDE                 | 1.889                                                        | 2.244                          | 1247.87            | 2800.29            | 4.240                          | 1016.30            | 4308.64            |
| A_68_P26569971 | chr9:62191474-62191518                            | NM_009672:2347      | Anp32a         | INSIDE                 | 1.888                                                        | 1.626                          | 2462.56            | 4004.47            | 3.070                          | 2044.89            | 6278.80            |
| A_68_P23763603 | chr5:67136839-67136883                            | NM_001001980:-218   | Limch1         | PROMOTER               | 1.888                                                        | 5.879                          | 1443.65            | 8487.48            | 11.099                         | 1197.28            | 13288.10           |
| A_68_P28604394 | chr12:86827035-86827079                           | NM_010234:12206     | Fos            | DOWNSTREAM             | 1.887                                                        | 3.215                          | 1472.75            | 4735.17            | 6.066                          | 1107.98            | 6721.43            |
| A_68_P30367903 | chr15:79518094-79518138                           | NM_028792:186       | Josd1          | INSIDE                 | 1.887                                                        | 3.055                          | 1146.51            | 3502.77            | 5.766                          | 919.95             | 5304.26            |
| A_68_P20723965 | chr11:154802917-154802961                         | NM_175460:708       | Nmnat2         | INSIDE                 | 1.887                                                        | 7.197                          | 5326.04            | 38330.74           | 13.580                         | 3487.41            | 47358.05           |
| A_68_P29624997 | chr14:57483807-57483852                           | AK209334:-895       |                | PROMOTER               | 1.887                                                        | 1.472                          | 811.40             | 1194.05            | 2.778                          | 730.58             | 2029.25            |
| A_68_P21438176 | chr2:93816807-93816851                            | NM_026944:34059     | Alkbh3         | DOWNSTREAM             | 1.886                                                        | 5.584                          | 1256.48            | 7015.68            | 10.528                         | 1153.90            | 12148.56           |
| A_68_P31152221 | chr17:34257414-34257458                           | NR_037970:-591      | Brd2           | PROMOTER               | 1.886                                                        | 4.785                          | 791.53             | 3787.67            | 9.025                          | 636.70             | 5746.45            |
| A_68_P27262526 | chr10:75994451-75994495                           | NM_146006:101       | Lss            | INSIDE                 | 1.886                                                        | 5.474                          | 6782.44            | 37124.20           | 10.325                         | 5005.00            | 51676.57           |
| A_68_P29054388 | chr13:55431309-55431353                           | NM_016662:-239      | Mxd3           | PROMOTER               | 1.886                                                        | 4.408                          | 1313.53            | 5789.64            | 8.315                          | 1065.03            | 8855.45            |
| A_68_P32118295 | chr19:42056730-42056774                           | NM_145500:500       | Ubt1           | INSIDE                 | 1.886                                                        | 6.127                          | 949.72             | 5818.85            | 11.553                         | 816.00             | 9427.02            |
| A_68_P25734548 | chr8:27891120-27891164                            |                     |                | Unknown                | 1.886                                                        | 2.789                          | 931.33             | 2597.80            | 5.262                          | 886.53             | 4664.93            |
| A_68_P29470473 | chr14:25064406-25064450                           | NM_001163513:714    | Dlg5           | INSIDE                 | 1.884                                                        | 21.987                         | 778.65             | 17120.00           | 41.423                         | 520.80             | 21572.99           |
| A_68_P20451406 | chr11:94729272-94729316                           | NM_016696:1032      | Gpc1           | INSIDE                 | 1.884                                                        | 4.338                          | 2033.27            | 8819.41            | 8.171                          | 1598.45            | 13060.72           |
| A_68_P25394537 | chr7:112959576-112959620                          | NM_025301:3         | Mrp117         | INSIDE                 | 1.884                                                        | 3.020                          | 2285.66            | 6902.31            | 5.690                          | 1763.25            | 10032.24           |
| A_68_P28246269 | chr12:12944121-12944165                           | NM_008709:4500      | Mycn           | INSIDE                 | 1.884                                                        | 3.332                          | 931.52             | 3104.13            | 6.278                          | 767.56             | 4818.81            |
| A_68_P28950705 | chr13:36816445-36816489                           | NM_153529:9857      | Nrm1           | DOWNSTREAM             | 1.884                                                        | 8.358                          | 4570.60            | 38201.00           | 15.746                         | 3319.36            | 52265.63           |
| A_68_P20085264 | chr11:22812557-22812601                           | NM_001012623:-15    | Rims1          | PROMOTER               | 1.884                                                        | 3.168                          | 5138.64            | 16277.20           | 5.969                          | 3944.43            | 23542.48           |
| A_68_P23468797 | chr5:8622724-8622768                              | NM_198620:206       | Runde3b        | INSIDE                 | 1.884                                                        | 1.793                          | 6375.10            | 11431.71           | 3.379                          | 5084.04            | 17177.17           |
| A_68_P28724517 | chr12:109154270-109154314                         | NM_001079883:87332  | Bcl11b         | INSIDE                 | 1.883                                                        | 5.082                          | 2190.88            | 11133.18           | 9.566                          | 1718.68            | 16441.20           |
| A_68_P30362680 | chr15:78673148-78673192                           | NM_027219:94        | Cde42ep1       | INSIDE                 | 1.883                                                        | 4.258                          | 1830.06            | 7792.26            | 8.016                          | 1529.47            | 12260.21           |
| A_68_P25598742 | chr7:150293216-150293260                          | NM_008434:80        | Kcnq1          | INSIDE                 | 1.883                                                        | 8.553                          | 779.08             | 6663.79            | 16.107                         | 603.76             | 9724.83            |
| A_68_P30421719 | chr15:88693018-88693062                           | NM_145478:417       | Pim3           | INSIDE                 | 1.883                                                        | 4.203                          | 734.95             | 3088.77            | 7.913                          | 589.31             | 4663.15            |
| A_68_P27541275 | chr10:127848643-127848687                         | NM_001164237:-7     | Rnf41          | DIVERGENT_PROMOTER     | 1.883                                                        | 5.832                          | 1251.46            | 7299.10            | 10.982                         | 997.40             | 10953.87           |
| A_68_P27836028 | chr11:59103858-59103902                           | NM_009522:373       | Wnt3a          | INSIDE                 | 1.883                                                        | 2.885                          | 1333.86            | 3847.79            | 5.431                          | 1095.47            | 5949.46            |
| A_68_P29631470 | chr14:58691022-58691066                           | NM_013518:-478      | Fgf9           | PROMOTER               | 1.882                                                        | 5.806                          | 1512.20            | 8780.06            | 10.924                         | 1230.13            | 13438.37           |
| A_68_P23787605 | chr5:72049192-72049236                            | NM_010251:333       | Gabra4         | INSIDE                 | 1.882                                                        | 5.032                          | 905.66             | 4556.89            | 9.471                          | 750.11             | 7104.47            |

| ProbeName      | Target position of probe on CpG island microarray | TargetID                 | GeneSymbol    | CpG island Description | Ratio of relative methylation (TiO <sub>2</sub> -NP/Vehicle) | Sham group                     |                    |                    | TiO <sub>2</sub> -H group      |                    |                    |
|----------------|---------------------------------------------------|--------------------------|---------------|------------------------|--------------------------------------------------------------|--------------------------------|--------------------|--------------------|--------------------------------|--------------------|--------------------|
|                |                                                   |                          |               |                        |                                                              | Relative methylation (Cy5/Cy3) | Cy3 signal (Input) | Cy5 signal (MeDIP) | Relative methylation (Cy5/Cy3) | Cy3 signal (Input) | Cy5 signal (MeDIP) |
| A_68_P24774311 | chr6:115944633-115944678                          | NM_026376:368            | Ptxnd1        | INSIDE                 | 1.882                                                        | 6.530                          | 3149.31            | 20564.84           | 12.291                         | 2421.41            | 29761.64           |
| A_68_P21812328 | chr2:163244957-163245001                          | NM_025699:228            | 3230401D17Rik | INSIDE                 | 1.881                                                        | 7.426                          | 2014.28            | 14958.86           | 13.971                         | 1569.90            | 21933.65           |
| A_68_P32775148 | chrX:155970504-155970548                          | NM_001033472:-73         | A830080D01Rik | PROMOTER               | 1.881                                                        | 4.182                          | 1734.44            | 7253.34            | 7.867                          | 1002.59            | 7887.70            |
| A_68_P27512350 | chr10:122513515-122513559                         | NM_001163024:25          | Mon2          | INSIDE                 | 1.881                                                        | 4.934                          | 2975.86            | 14683.41           | 9.281                          | 2372.94            | 22023.12           |
| A_68_P30463766 | chr15:96290439-96290483                           | NM_028148:814            | Scaf11        | INSIDE                 | 1.881                                                        | 1.929                          | 1477.99            | 2851.50            | 3.629                          | 1168.09            | 4239.56            |
| A_68_P29051405 | chr13:54890823-54890867                           | NM_028841:79             | Tspan17       | INSIDE                 | 1.881                                                        | 3.452                          | 458.95             | 1584.22            | 6.494                          | 329.33             | 2138.76            |
| A_68_P30346013 | chr15:75920805-75920849                           | NM_144847:-383           | Nrbp2         | PROMOTER               | 1.880                                                        | 2.482                          | 2490.06            | 6180.14            | 4.665                          | 1969.62            | 9188.98            |
| A_68_P22398585 | chr3:105490135-105490179                          | NM_017397:333            | Ddx20         | INSIDE                 | 1.879                                                        | 2.525                          | 1089.30            | 2750.84            | 4.746                          | 942.09             | 4471.30            |
| A_68_P20877951 | chr1:182742690-182742734                          | NM_008210:1022           | H3f3a         | INSIDE                 | 1.879                                                        | 2.919                          | 2269.28            | 6623.75            | 5.485                          | 1821.43            | 9991.04            |
| A_68_P30346762 | chr15:76028710-76028754                           | NM_201393:-93            | Plec          | PROMOTER               | 1.879                                                        | 3.238                          | 2210.87            | 7157.92            | 6.082                          | 1649.76            | 10033.85           |
| A_68_P32567036 | chrX:99266249-99266293                            | NM_183318:376            | Rgag4         | INSIDE                 | 1.879                                                        | 8.946                          | 4538.15            | 40597.66           | 16.807                         | 2317.83            | 38955.67           |
| A_68_P22872576 | chr4:43591441-43591485                            | NM_172866:-144           | Rgp1          | PROMOTER               | 1.879                                                        | 2.255                          | 663.43             | 1495.70            | 4.236                          | 480.39             | 2035.06            |
| A_68_P21266440 | chr2:61650101-61650145                            | NM_009322:7613           | Tbr1          | INSIDE                 | 1.879                                                        | 2.100                          | 424.79             | 892.06             | 3.945                          | 412.76             | 1628.36            |
| A_68_P26554375 | chr9:59465216-59465260                            | NM_001205239:148         | Parp6         | INSIDE                 | 1.878                                                        | 4.980                          | 2916.91            | 14526.13           | 9.350                          | 2137.24            | 19983.87           |
| A_68_P23062645 | chr4:83131826-83131870                            | NM_133948:446            | Psip1         | INSIDE                 | 1.878                                                        | 2.791                          | 1459.70            | 4074.48            | 5.242                          | 1255.71            | 6581.91            |
| A_68_P26290461 | chr9:8004643-8004687                              | NM_001171147:-68         | Yap1          | PROMOTER               | 1.878                                                        | 5.407                          | 3903.80            | 21106.63           | 10.155                         | 3228.67            | 32788.72           |
| A_68_P32565199 | chrX:98892409-98892453                            | ENSMUST00000073812:-5241 |               | PROMOTER               | 1.878                                                        | 6.112                          | 8917.51            | 54505.77           | 11.481                         | 3674.32            | 42184.32           |
| A_68_P27563898 | chr11:5441853-5441897                             | NM_134033:346            | Ccdc117       | INSIDE                 | 1.877                                                        | 5.498                          | 3920.15            | 21554.59           | 10.319                         | 3139.07            | 32391.51           |
| A_68_P30490489 | chr15:101062456-101062514                         | NM_019518:7847           | Grasp         | INSIDE                 | 1.877                                                        | 9.892                          | 1964.82            | 19435.55           | 18.567                         | 1397.98            | 25956.94           |
| A_68_P30337599 | chr15:74347574-74347618                           | NM_174991:971            | Bai1          | INSIDE                 | 1.876                                                        | 5.979                          | 1825.93            | 10917.73           | 11.217                         | 1386.24            | 15550.12           |
| A_68_P26756440 | chr9:97933663-97933707                            | NM_022319:-98            | C1stn2        | PROMOTER               | 1.876                                                        | 9.816                          | 3587.04            | 35211.04           | 18.414                         | 3006.61            | 55364.42           |
| A_68_P25092690 | chr7:52622810-52622854                            | NR_027802:230            | Mtag2         | INSIDE                 | 1.876                                                        | 3.324                          | 2610.46            | 8676.44            | 6.236                          | 1965.83            | 12259.79           |
| A_68_P23328804 | chr4:135050696-135050741                          | NM_028995:-299           | Nipal3        | DIVERGENT_PROMOTER     | 1.876                                                        | 2.629                          | 2957.08            | 7775.38            | 4.932                          | 2108.10            | 10397.66           |
| A_68_P26783904 | chr9:103014963-103015007                          | NM_173781:581            | Rab6b         | INSIDE                 | 1.876                                                        | 6.996                          | 3134.89            | 21931.57           | 13.124                         | 2261.49            | 29680.34           |
| A_68_P27693347 | chr11:33101808-33101852                           | NM_019916:1758           | Tlx3          | INSIDE                 | 1.876                                                        | 2.938                          | 673.36             | 1978.25            | 5.511                          | 549.92             | 3030.69            |
| A_68_P29751622 | chr14:79881067-79881111                           | NM_018765:-13            | Wbp4          | PROMOTER               | 1.876                                                        | 0.357                          | 1577.79            | 563.98             | 0.670                          | 1430.02            | 958.78             |
| A_68_P27788008 | chr11:50139149-50139193                           | NM_001110499:5           | Canx          | INSIDE                 | 1.875                                                        | 2.514                          | 5536.90            | 13918.62           | 4.712                          | 4124.56            | 19436.10           |
| A_68_P31112726 | chr17:26978463-26978507                           | NM_008700:26             | Nkx2-5        | INSIDE                 | 1.875                                                        | 3.055                          | 1100.14            | 3361.00            | 5.729                          | 941.99             | 5396.80            |
| A_68_P26015929 | chr8:86192596-86192640                            | NM_013641:2080           | Ptger1        | INSIDE                 | 1.875                                                        | 5.992                          | 6861.71            | 41111.95           | 11.236                         | 4744.67            | 53309.83           |
| A_68_P27996402 | chr11:87630757-87630801                           | NM_080420:8838           | Lpo           | INSIDE                 | 1.874                                                        | 3.124                          | 2302.41            | 7193.28            | 5.856                          | 1764.87            | 10335.15           |
| A_68_P28376737 | chr12:40860793-40860837                           | NM_001146196:1           | Scin          | INSIDE                 | 1.874                                                        | 8.543                          | 1868.55            | 15962.97           | 16.011                         | 1151.05            | 18429.85           |
| A_68_P27167594 | chr10:58684574-58684618                           | NM_001024910:-1          | Septin10      | DIVERGENT_PROMOTER     | 1.874                                                        | 6.097                          | 4520.24            | 27558.99           | 11.425                         | 3322.33            | 37957.26           |
| A_68_P22338534 | chr3:94167626-94167670                            | NM_001136117:1283        | C2cd4d        | INSIDE                 | 1.873                                                        | 6.728                          | 2320.94            | 15615.16           | 12.603                         | 1545.88            | 19482.20           |
| A_68_P32185492 | chr19:54018463-54018507                           | NM_001168505:-311        | Shoc2         | PROMOTER               | 1.873                                                        | 3.317                          | 398.42             | 1321.74            | 6.212                          | 340.43             | 2114.92            |
| A_68_P27456596 | chr10:112366019-112366063                         | NM_001033474:42          | Atxn7l3b      | INSIDE                 | 1.872                                                        | 2.055                          | 1150.38            | 2364.14            | 3.846                          | 889.33             | 3420.50            |
| A_68_P22045621 | chr3:33919264-33919308                            | NM_001113188:286         | Fxr1          | INSIDE                 | 1.872                                                        | 5.067                          | 1615.59            | 8186.84            | 9.487                          | 1389.21            | 13179.17           |
| A_68_P26974637 | chr10:18039197-18039241                           |                          |               | Unknown                | 1.872                                                        | 4.510                          | 1580.08            | 7125.83            | 8.444                          | 1398.48            | 11808.21           |
| A_68_P20453775 | chr1:95073064-95073108                            |                          |               | Unknown                | 1.872                                                        | 4.538                          | 4204.56            | 19080.88           | 8.496                          | 3052.39            | 25933.24           |
| A_68_P30594370 | chr16:21794748-21794792                           | NR_037957:351            | 1300002E11Rik | INSIDE                 | 1.871                                                        | 2.126                          | 2580.94            | 5487.07            | 3.977                          | 1897.25            | 7546.25            |
| A_68_P31350938 | chr17:74715809-74715853                           | NM_001146223:-57         | Dpy30         | PROMOTER               | 1.871                                                        | 3.740                          | 704.95             | 2636.74            | 7.000                          | 589.60             | 4127.01            |
| A_68_P21683849 | chr2:140221825-140221869                          | NM_028387:676            | MacroD2       | INSIDE                 | 1.871                                                        | 6.341                          | 1384.22            | 8776.69            | 11.861                         | 1025.84            | 12167.25           |
| A_68_P26590952 | chr9:65908094-65908138                            | NM_011149:141            | Ppib          | INSIDE                 | 1.871                                                        | 4.387                          | 1835.70            | 8054.00            | 8.209                          | 1472.92            | 12091.40           |
| A_68_P23362920 | chr4:140804003-140804047                          | NM_172520:5226           | Arhgef19      | INSIDE                 | 1.870                                                        | 5.882                          | 3780.71            | 22238.90           | 11.000                         | 2681.58            | 29498.68           |
| A_68_P24993125 | chr17:19989502-19989546                           | NM_146182:-4319          | Klc3          | DIVERGENT_PROMOTER     | 1.870                                                        | 5.073                          | 605.74             | 3072.82            | 9.488                          | 524.06             | 4972.47            |
| A_68_P30759540 | chr16:52031753-52031797                           | NM_001033238:113         | Cblb          | INSIDE                 | 1.869                                                        | 5.433                          | 3786.69            | 20574.64           | 10.156                         | 2974.85            | 30212.40           |
| A_68_P21478262 | chr2:102499332-102499376                          | NM_001077514:515         | Slc1a2        | INSIDE                 | 1.869                                                        | 1.470                          | 1996.54            | 2934.82            | 2.748                          | 1860.15            | 5111.37            |
| A_68_P31560905 | chr18:24761962-24762006                           | NM_139143:334            | Slc39a6       | INSIDE                 | 1.868                                                        | 2.161                          | 1272.21            | 2749.55            | 4.037                          | 1035.29            | 4179.32            |
| A_68_P31204664 | chr17:46168459-46168503                           | NM_001110266:-6368       | Vegfa         | PROMOTER               | 1.868                                                        | 3.938                          | 2692.61            | 10604.08           | 7.358                          | 1954.89            | 14383.83           |
| A_68_P21072052 | chr2:25283953-25283999                            | NM_007379:-217           | Abca2         | PROMOTER               | 1.867                                                        | 6.187                          | 1092.36            | 6758.71            | 11.554                         | 738.63             | 8533.92            |
| A_68_P22878646 | chr4:44717054-44717098                            | NM_008782:6236           | Pax5          | INSIDE                 | 1.867                                                        | 3.219                          | 1464.92            | 4715.36            | 6.011                          | 1183.08            | 7111.31            |
| A_68_P26931630 | chr10:9394840-9394884                             | NM_177271:144            | Samd5         | INSIDE                 | 1.867                                                        | 2.575                          | 252.30             | 649.59             | 4.807                          | 193.73             | 931.21             |

| ProbeName      | Target position of probe on CpG island microarray | TargetID               | GeneSymbol    | CpG island Description | Ratio of relative methylation (TiO <sub>2</sub> -NP/Vehicle) | Sham group                     |                    |                    | TiO <sub>2</sub> -H group      |                    |                    |
|----------------|---------------------------------------------------|------------------------|---------------|------------------------|--------------------------------------------------------------|--------------------------------|--------------------|--------------------|--------------------------------|--------------------|--------------------|
|                |                                                   |                        |               |                        |                                                              | Relative methylation (Cy5/Cy3) | Cy3 signal (Input) | Cy5 signal (MeDIP) | Relative methylation (Cy5/Cy3) | Cy3 signal (Input) | Cy5 signal (MeDIP) |
| A_68_P26399336 | chr9:31018727-31018771                            | NM_001102455:652       | Aplp2         | INSIDE                 | 1.866                                                        | 3.500                          | 1846.08            | 6460.53            | 6.530                          | 1573.87            | 10276.76           |
| A_68_P31933966 | chr19:6320610-6320654                             | NM_001033342:14176     | Cdc42bpg      | INSIDE                 | 1.866                                                        | 2.451                          | 1328.64            | 3256.35            | 4.573                          | 993.63             | 4544.01            |
| A_68_P28143851 | chr11:113612678-113612722                         | NM_020006:-226         | Cdc42ep4      | PROMOTER               | 1.866                                                        | 5.437                          | 4581.48            | 24908.34           | 10.143                         | 3566.82            | 36177.86           |
| A_68_P32815030 | chrX:164561176-164561220                          | NM_001033330:453967    | Frmpd4        | INSIDE                 | 1.866                                                        | 1.925                          | 4121.47            | 7933.14            | 3.592                          | 2105.63            | 7564.06            |
| A_68_P27850828 | chr11:61668703-61668747                           | NM_013881:-130         | Ulk2          | PROMOTER               | 1.866                                                        | 9.965                          | 2530.43            | 25216.61           | 18.596                         | 1822.22            | 33886.04           |
| A_68_P23231372 | chr4:116550094-116550138                          | NM_001029912:110       | Zswim5        | INSIDE                 | 1.866                                                        | 3.471                          | 2852.81            | 9901.03            | 6.476                          | 2279.39            | 14761.92           |
| A_68_P29243355 | chr13:96661950-96661994                           | NM_027711:-95          | Iqgap2        | PROMOTER               | 1.865                                                        | 7.954                          | 4160.49            | 33091.43           | 14.837                         | 3280.77            | 48675.82           |
| A_68_P28587837 | chr12:83718482-83718526                           | NM_015812:480          | Rgs6          | INSIDE                 | 1.865                                                        | 4.469                          | 5923.59            | 26471.32           | 8.335                          | 4024.42            | 33544.94           |
| A_68_P24153558 | chr5:143580250-143580294                          | NM_001122730:-1206     | Tnrc18        | PROMOTER               | 1.865                                                        | 3.080                          | 1012.96            | 3120.38            | 5.746                          | 755.98             | 4343.72            |
| A_68_P26242187 | chr8:126416382-126416426                          | NM_009606:2232         | Acta1         | INSIDE                 | 1.864                                                        | 5.940                          | 2048.63            | 12168.98           | 11.070                         | 1536.20            | 17005.65           |
| A_68_P25017319 | chr7:28232977-28233021                            | NM_144923:2            | Blvrb         | INSIDE                 | 1.864                                                        | 5.626                          | 831.95             | 4680.16            | 10.488                         | 640.99             | 6722.65            |
| A_68_P21871012 | chr2:173485328-173485372                          | NM_024436:5            | Rab22a        | INSIDE                 | 1.864                                                        | 3.810                          | 1753.20            | 6679.06            | 7.102                          | 1469.63            | 10436.92           |
| A_68_P30379103 | chr15:81524969-81525013                           | NM_001164320:2727      | Chadl         | INSIDE                 | 1.863                                                        | 5.182                          | 1487.64            | 7708.88            | 9.656                          | 1312.39            | 12672.07           |
| A_68_P31933641 | chr19:6277445-6277489                             | NM_010119:571          | Ehd1          | INSIDE                 | 1.863                                                        | 2.535                          | 2307.03            | 5847.36            | 4.723                          | 1920.83            | 9072.38            |
| A_68_P23416733 | chr4:151506350-151506394                          | NM_019585:-3338        | Espn          | PROMOTER               | 1.863                                                        | 2.714                          | 1723.10            | 4676.52            | 5.057                          | 1235.44            | 6248.09            |
| A_68_P21820992 | chr2:164823190-164823234                          | NM_020333:29725        | Slc12a5       | INSIDE                 | 1.863                                                        | 4.280                          | 1560.22            | 6677.49            | 7.972                          | 1157.02            | 9223.73            |
| A_68_P31932456 | chr19:6060898-6060957                             | NM_013859:-279         | Znhit2-ps     | PROMOTER               | 1.863                                                        | 9.177                          | 22684.11           | 208180.60          | 17.096                         | 12764.16           | 218213.80          |
| A_68_P26542457 | chr9:57408653-57408697                            | NM_022813:-76          | Scamp2        | DIVERGENT_PROMOTER     | 1.862                                                        | 8.524                          | 2860.02            | 24377.60           | 15.873                         | 2166.72            | 34391.44           |
| A_68_P28778754 | chr12:119539626-119539670                         | NM_001166385:265       | Sp4           | INSIDE                 | 1.862                                                        | 2.643                          | 5538.52            | 14636.78           | 4.922                          | 3708.25            | 18250.32           |
| A_68_P28871505 | chr13:21272743-21272787                           | NM_009054:937          | Trim27        | INSIDE                 | 1.862                                                        | 3.993                          | 1642.00            | 6556.20            | 7.435                          | 1345.09            | 10000.14           |
| A_68_P26844412 | chr9:114299556-114299600                          | NM_019922:252          | Crtap         | INSIDE                 | 1.861                                                        | 2.317                          | 304.24             | 704.96             | 4.312                          | 255.06             | 1099.81            |
| A_68_P24859179 | chr6:133986298-133986342                          | NM_007961:596          | Etv6          | INSIDE                 | 1.861                                                        | 4.825                          | 3201.66            | 15448.10           | 8.981                          | 2185.86            | 19630.72           |
| A_68_P31136610 | chr17:31038660-31038704                           | NM_021332:-129         | Glip1r        | PROMOTER               | 1.861                                                        | 3.103                          | 1597.84            | 4957.41            | 5.775                          | 1231.07            | 7109.74            |
| A_68_P24005520 | chr5:115141122-115141166                          | NM_019821:-200         | Gltp          | PROMOTER               | 1.861                                                        | 14.750                         | 2824.25            | 41658.07           | 27.452                         | 1892.70            | 51959.08           |
| A_68_P30348856 | chr15:76348296-76348340                           | NM_130893:4241         | Sert1         | INSIDE                 | 1.861                                                        | 1.663                          | 646.71             | 1075.76            | 3.096                          | 568.99             | 1761.59            |
| A_68_P33005878 | A_68_P33005878                                    |                        | Unknown       | Unknown                | 1.861                                                        | 2.483                          | 1273.31            | 3161.72            | 4.622                          | 1150.16            | 5316.27            |
| A_68_P32288523 | chrX:20003140-20003184                            | ENSMUST00000136093:249 |               | INSIDE                 | 1.861                                                        | 2.307                          | 1224.44            | 2824.45            | 4.292                          | 634.04             | 2721.51            |
| A_68_P30093919 | chr15:27611395-27611439                           | NM_198301:-163         | Fam105a       | PROMOTER               | 1.860                                                        | 6.742                          | 2286.11            | 15412.02           | 12.541                         | 1862.41            | 23356.17           |
| A_68_P30137020 | chr15:36094444-36094488                           | NM_001081253:173       | Fbxo43        | INSIDE                 | 1.860                                                        | 5.797                          | 2825.11            | 16376.00           | 10.784                         | 2325.91            | 25082.19           |
| A_68_P32127978 | chr19:43749225-43749269                           | NM_145156:125          | Slc25a28      | INSIDE                 | 1.860                                                        | 3.834                          | 4546.31            | 17431.31           | 7.130                          | 3722.09            | 26537.24           |
| A_68_P22411695 | chr3:108086638-108086682                          | NM_019972:-389         | Sort1         | PROMOTER               | 1.860                                                        | 12.153                         | 4225.97            | 51358.98           | 22.603                         | 3331.36            | 75298.24           |
| A_68_P27907296 | chr11:71564250-71564294                           | NM_177618:68           | Wscd1         | INSIDE                 | 1.860                                                        | 4.496                          | 4666.83            | 20981.39           | 8.363                          | 3397.05            | 28410.13           |
| A_68_P26036153 | chr8:90184081-90184125                            | NM_033327:299392       | Zfp423        | DOWNSTREAM             | 1.860                                                        | 2.586                          | 2470.14            | 6388.56            | 4.811                          | 1808.14            | 8699.09            |
| A_68_P26617803 | chr9:70527024-70527068                            | NM_007399:239          | Adam10        | INSIDE                 | 1.859                                                        | 3.341                          | 3327.19            | 11116.75           | 6.210                          | 2658.10            | 16507.02           |
| A_68_P29629464 | chr14:58318596-58318640                           | NM_015771:46342        | Lats2         | INSIDE                 | 1.859                                                        | 4.525                          | 1145.35            | 5183.03            | 8.411                          | 850.90             | 7156.64            |
| A_68_P29055172 | chr13:55665926-55665970                           | NM_001030296:321       | Prr7          | INSIDE                 | 1.859                                                        | 1.859                          | 1462.78            | 2719.55            | 3.456                          | 1167.23            | 4034.24            |
| A_68_P21641570 | chr2:132512792-132512837                          | NM_028637:-3204        | 1110034G24Rik | PROMOTER               | 1.858                                                        | 6.225                          | 4805.88            | 29915.80           | 11.569                         | 3480.64            | 40266.74           |
| A_68_P28576807 | chr12:81744426-81744470                           | NM_007951:400          | Erh           | INSIDE                 | 1.857                                                        | 8.037                          | 3705.65            | 29783.34           | 14.922                         | 2743.77            | 40942.16           |
| A_68_P20942041 | chr1:194014550-194014594                          | NM_001038607:-181      | Kenh1         | PROMOTER               | 1.857                                                        | 6.657                          | 1568.79            | 10443.24           | 12.363                         | 1127.88            | 13944.47           |
| A_68_P20877047 | chr1:182571834-182571878                          | NM_175186:392          | Lin9          | INSIDE                 | 1.857                                                        | 3.800                          | 539.78             | 2051.03            | 7.055                          | 419.29             | 2957.95            |
| A_68_P26500017 | chr9:49606485-49606529                            | NM_001081445:668       | Neam1         | INSIDE                 | 1.857                                                        | 2.717                          | 2069.79            | 5624.12            | 5.047                          | 1608.35            | 8117.62            |
| A_68_P30176273 | chr15:43308698-43308742                           | NM_025736:-54          | Tie35         | PROMOTER               | 1.857                                                        | 2.199                          | 1903.70            | 4185.70            | 4.083                          | 1443.41            | 5892.75            |
| A_68_P32203587 | chr19:56948670-56948714                           | NM_172840:-213         | Vwa2          | PROMOTER               | 1.857                                                        | 2.149                          | 2555.17            | 5491.18            | 3.992                          | 1976.20            | 7888.36            |
| A_68_P32245740 | chrX:8777550-8777594                              | NM_173414:474          | Lanel3        | INSIDE                 | 1.856                                                        | 3.553                          | 2031.89            | 7220.04            | 6.594                          | 1133.27            | 7472.63            |
| A_68_P27812425 | chr11:54674397-54674456                           | NM_029327:-333         | Lym7          | DIVERGENT_PROMOTER     | 1.856                                                        | 6.650                          | 561.10             | 3731.56            | 12.345                         | 393.08             | 4852.51            |
| A_68_P20929010 | chr1:191746024-191746068                          | NM_026796:121          | Smyd2         | INSIDE                 | 1.856                                                        | 1.637                          | 1106.26            | 1810.60            | 3.039                          | 961.74             | 2922.27            |
| A_68_P29037076 | chr13:51195741-51195786                           | NR_029463:333          | 9430083A17Rik | INSIDE                 | 1.855                                                        | 7.570                          | 295.35             | 2235.85            | 14.039                         | 200.59             | 2816.15            |
| A_68_P24798780 | chr6:120442970-120443014                          | NM_033567:833          | Cer6f         | INSIDE                 | 1.855                                                        | 9.906                          | 4627.20            | 45837.77           | 18.374                         | 3197.85            | 58756.19           |
| A_68_P28152301 | chr11:115111293-115111337                         | NM_010350:17243        | Grin2c        | INSIDE                 | 1.855                                                        | 4.543                          | 821.35             | 3731.26            | 8.426                          | 625.37             | 5269.14            |
| A_68_P25088285 | chr7:51846895-51846939                            | NM_008422:661          | Kenc3         | INSIDE                 | 1.855                                                        | 1.592                          | 1174.97            | 1870.06            | 2.953                          | 960.40             | 2835.96            |
| A_68_P31150844 | chr17:34027540-34027584                           | NM_001195298:16        | Kifc1         | INSIDE                 | 1.855                                                        | 2.792                          | 4744.51            | 13244.59           | 5.177                          | 3568.63            | 18475.69           |



| ProbeName      | Target position of probe on CpG island microarray | TargetID                 | GeneSymbol    | CpG island Description | Ratio of relative methylation (TiO <sub>2</sub> -NP/Vehicle) | Sham group                     |                    |                    | TiO <sub>2</sub> -H group      |                    |                    |
|----------------|---------------------------------------------------|--------------------------|---------------|------------------------|--------------------------------------------------------------|--------------------------------|--------------------|--------------------|--------------------------------|--------------------|--------------------|
|                |                                                   |                          |               |                        |                                                              | Relative methylation (Cy5/Cy3) | Cy3 signal (Input) | Cy5 signal (MeDIP) | Relative methylation (Cy5/Cy3) | Cy3 signal (Input) | Cy5 signal (MeDIP) |
| A_68_P28781893 | chr12:120087514-120087558                         | NM_177082:2735           | Sp8           | INSIDE                 | 1.855                                                        | 6.228                          | 2260.85            | 14079.59           | 11.549                         | 1813.01            | 20938.56           |
| A_68_P21117286 | chr2:32612762-32612806                            | NM_152800:-6             | Tor2a         | PROMOTER               | 1.855                                                        | 3.906                          | 1786.12            | 6976.17            | 7.247                          | 1455.65            | 10548.40           |
| A_68_P26826440 | chr9:110782793-110782837                          | NM_001146060:-11         | Als2cl        | PROMOTER               | 1.854                                                        | 2.810                          | 1878.69            | 5278.63            | 5.210                          | 1557.45            | 8114.97            |
| A_68_P32563078 | chrX:98450245-98450289                            | NM_018789:400            | Foxo4         | INSIDE                 | 1.854                                                        | 2.398                          | 2878.19            | 6901.22            | 4.445                          | 1681.25            | 7473.24            |
| A_68_P25022784 | chr7:29383198-29383242                            | NM_027470:-17            | Pak4          | PROMOTER               | 1.853                                                        | 2.382                          | 1554.18            | 3702.31            | 4.414                          | 1320.10            | 5827.10            |
| A_68_P24631961 | chr6:90319416-90319460                            | NM_030260:-49            | Zxdc          | PROMOTER               | 1.853                                                        | 2.577                          | 1348.62            | 3475.42            | 4.775                          | 1139.85            | 5442.93            |
| A_68_P26897431 | A_68_P26897431                                    |                          |               | Unknown                | 1.853                                                        | 3.957                          | 2107.03            | 8337.27            | 7.333                          | 1705.38            | 12505.80           |
| A_68_P22312502 | chr3:88018703-88018747                            | NR_037276:-368           | Mir3093       | PROMOTER               | 1.852                                                        | 2.529                          | 1938.75            | 4903.30            | 4.684                          | 1457.09            | 6825.26            |
| A_68_P27980115 | chr11:84693687-84693731                           | NM_027388:-11            | Pigw          | DIVERGENT_PROMOTER     | 1.852                                                        | 5.805                          | 4740.80            | 27519.45           | 10.748                         | 3448.08            | 37060.13           |
| A_68_P21307670 | chr2:69044152-69044196                            | NM_001199123:73          | Spc25         | INSIDE                 | 1.852                                                        | 3.706                          | 1585.79            | 5877.44            | 6.865                          | 1353.50            | 9291.82            |
| A_68_P29560590 | chr14:41779806-41779850                           | NM_145928:268            | Tspan14       | INSIDE                 | 1.852                                                        | 3.937                          | 6353.90            | 25015.85           | 7.292                          | 5038.57            | 36742.06           |
| A_68_P28172267 | chr11:118430861-118430905                         | NM_001024931:340004      | Rbfox3        | INSIDE                 | 1.851                                                        | 7.994                          | 1742.26            | 13928.25           | 14.799                         | 1321.84            | 19561.59           |
| A_68_P23588840 | chr5:33775538-33775582                            | ENSMUST00000030994:-1716 |               | PROMOTER               | 1.851                                                        | 3.157                          | 943.98             | 2980.57            | 5.843                          | 721.78             | 4217.52            |
| A_68_P22128839 | chr3:51081429-51081473                            | NM_023502:48459          | Ehf2          | INSIDE                 | 1.850                                                        | 5.104                          | 1669.02            | 8517.86            | 9.439                          | 1364.87            | 12883.47           |
| A_68_P26248330 | chr8:127421598-127421642                          | NM_198103:-15            | Exoc8         | DIVERGENT_PROMOTER     | 1.850                                                        | 4.396                          | 1582.35            | 6956.78            | 8.135                          | 1298.63            | 10564.61           |
| A_68_P23195768 | chr4:108055890-10805934                           | NM_001099303:42          | Fam159a       | INSIDE                 | 1.850                                                        | 3.727                          | 1717.43            | 6400.97            | 6.893                          | 1331.16            | 9176.22            |
| A_68_P27997843 | chr11:87912671-87912715                           | NM_198013:45             | Cuedc1        | INSIDE                 | 1.849                                                        | 4.175                          | 3123.06            | 13039.48           | 7.721                          | 2763.17            | 21333.33           |
| A_68_P27681336 | chr11:30854073-30854117                           | NM_025745:37             | Erlec1        | INSIDE                 | 1.849                                                        | 8.253                          | 1290.17            | 10647.89           | 15.262                         | 994.76             | 15181.97           |
| A_68_P22481656 | chr3:121996594-121996638                          | NR_030439:5              | Mir760        | INSIDE                 | 1.849                                                        | 3.682                          | 1919.95            | 7068.63            | 6.809                          | 1611.73            | 10973.93           |
| A_68_P23230191 | chr4:116299963-116300007                          | NM_001081475:118         | Nasp          | INSIDE                 | 1.849                                                        | 1.862                          | 608.42             | 1132.81            | 3.442                          | 451.71             | 1554.89            |
| A_68_P21780565 | chr2:157854409-157854453                          | NM_027434:-99            | Rprd1b        | PROMOTER               | 1.849                                                        | 2.117                          | 3552.85            | 7520.53            | 3.913                          | 2754.84            | 10779.73           |
| A_68_P23778454 | chr5:69948402-69948446                            | NM_172711:244            | Guf1          | INSIDE                 | 1.848                                                        | 11.820                         | 651.41             | 7699.92            | 21.844                         | 469.40             | 10253.48           |
| A_68_P27628926 | chr11:19825568-19825612                           | NM_033523:1146           | Spred2        | INSIDE                 | 1.848                                                        | 5.940                          | 1757.69            | 10440.87           | 10.975                         | 1358.52            | 14909.89           |
| A_68_P20268943 | chr1:60466325-60466369                            | NM_001198570:-116        | Abi2          | PROMOTER               | 1.847                                                        | 3.771                          | 2029.17            | 7651.42            | 6.965                          | 1746.26            | 12163.37           |
| A_68_P28725240 | chr12:109244557-109244601                         | NM_001079883:-2954       | Bcl11b        | PROMOTER               | 1.847                                                        | 10.113                         | 8411.21            | 85064.03           | 18.677                         | 6212.44            | 116032.30          |
| A_68_P24112800 | chr5:135164852-135164896                          | NM_010717:-414           | Limk1         | PROMOTER               | 1.847                                                        | 3.153                          | 1731.17            | 5458.42            | 5.825                          | 1224.90            | 7134.82            |
| A_68_P29700473 | chr14:70689417-70689461                           | NM_008915:-182           | Ppp3cc        | PROMOTER               | 1.847                                                        | 1.470                          | 711.29             | 1045.58            | 2.714                          | 616.46             | 1673.29            |
| A_68_P20796837 | chr1:167775393-167775437                          | NM_001113391:56603       | Cd247         | INSIDE                 | 1.846                                                        | 3.316                          | 1024.24            | 3396.84            | 6.123                          | 945.61             | 5790.05            |
| A_68_P31092997 | chr17:23816594-23816638                           | NM_018777:285            | Cldn6         | INSIDE                 | 1.846                                                        | 2.792                          | 6471.81            | 18068.45           | 5.154                          | 4832.01            | 24904.13           |
| A_68_P32798239 | chrX:160857687-160857731                          | NM_011081:-10            | Piga          | PROMOTER               | 1.846                                                        | 2.501                          | 1866.07            | 4667.41            | 4.618                          | 951.22             | 4392.61            |
| A_68_P27560706 | chr11:4886974-4887018                             | NM_007454:89             | Ap1b1         | INSIDE                 | 1.845                                                        | 5.714                          | 2772.77            | 15842.99           | 10.541                         | 2186.53            | 23047.61           |
| A_68_P26814987 | chr9:108362953-108362997                          | NM_133744:126            | Ccdc71        | INSIDE                 | 1.845                                                        | 3.061                          | 1718.26            | 5258.97            | 5.647                          | 1503.95            | 8493.19            |
| A_68_P25005401 | chr7:25319057-25319101                            | NM_153134:3412           | Irgq          | INSIDE                 | 1.845                                                        | 7.348                          | 962.25             | 7071.03            | 13.556                         | 824.30             | 11174.33           |
| A_68_P24322963 | chr6:28783645-28783689                            | NM_138682:-1919          | Lrrc4         | PROMOTER               | 1.845                                                        | 3.671                          | 1049.16            | 3851.39            | 6.772                          | 1235.47            | 8367.10            |
| A_68_P31621448 | chr18:36178193-36178239                           | NM_001167891:178598      | Nrg2          | INSIDE                 | 1.845                                                        | 5.845                          | 6052.49            | 35379.04           | 10.786                         | 4628.59            | 49921.89           |
| A_68_P23618578 | chr5:38668746-38668790                            | NM_172709:126            | Otop1         | INSIDE                 | 1.845                                                        | 3.000                          | 1919.11            | 5756.51            | 5.536                          | 1513.31            | 8377.17            |
| A_68_P30729955 | chr16:46010463-46010507                           | NM_001134480:42          | Plexd2        | INSIDE                 | 1.845                                                        | 4.883                          | 876.34             | 4279.17            | 9.008                          | 681.15             | 6135.69            |
| A_68_P21566993 | chr2:118752216-118752260                          | NM_028117:6              | Chst14        | INSIDE                 | 1.844                                                        | 4.062                          | 1825.71            | 7415.99            | 7.491                          | 1518.00            | 11371.36           |
| A_68_P32229410 | chr19:61301151-61301195                           | NM_009970:3149           | Cst2ra        | INSIDE                 | 1.844                                                        | 8.907                          | 12157.54           | 108287.80          | 16.425                         | 7752.53            | 127333.40          |
| A_68_P31122728 | chr17:2862253-28622597                            | NM_010220:483            | Fkbp5         | INSIDE                 | 1.844                                                        | 2.440                          | 266.10             | 649.29             | 4.499                          | 246.20             | 1107.77            |
| A_68_P22483661 | chr3:122321647-122321691                          | NM_00114665:917          | Fnbp11        | INSIDE                 | 1.844                                                        | 6.922                          | 969.79             | 6713.12            | 12.762                         | 832.67             | 10626.89           |
| A_68_P23261234 | chr4:122866488-122866532                          | NM_174998:5764           | Hpcal4        | INSIDE                 | 1.844                                                        | 7.354                          | 10025.79           | 73731.62           | 13.561                         | 6913.90            | 93759.12           |
| A_68_P23373724 | chr4:142752116-142752160                          | NM_001081355:50474       | Prdm2         | INSIDE                 | 1.844                                                        | 3.720                          | 941.81             | 3503.25            | 6.859                          | 847.18             | 5811.11            |
| A_68_P31162032 | chr17:36116207-36116251                           | NR_028516:-260           | Prr3          | PROMOTER               | 1.844                                                        | 4.839                          | 2099.54            | 10159.79           | 8.921                          | 1578.09            | 14077.99           |
| A_68_P25103254 | chr7:54387461-54387505                            | NM_001163565:486         | Ptpn5         | INSIDE                 | 1.844                                                        | 3.412                          | 2019.97            | 6892.19            | 6.290                          | 1577.30            | 9921.40            |
| A_68_P26574053 | chr9:62986483-62986527                            | NM_172446:8283           | Skor1         | INSIDE                 | 1.844                                                        | 6.491                          | 392.52             | 2547.85            | 11.969                         | 308.45             | 3691.74            |
| A_68_P21844247 | chr2:168760922-168760966                          | NM_009564:20143          | Zfp64         | INSIDE                 | 1.844                                                        | 7.758                          | 353.32             | 2740.99            | 14.308                         | 325.64             | 4659.13            |
| A_68_P32565200 | chrX:98892529-98892573                            | ENSMUST00000073812:-5361 |               | PROMOTER               | 1.844                                                        | 7.736                          | 2925.10            | 22628.70           | 14.269                         | 1541.65            | 21997.32           |
| A_68_P31939711 | chr19:7496090-7496134                             | NM_175381:3998           | 2700081O15Rik | INSIDE                 | 1.843                                                        | 5.555                          | 2835.16            | 15749.15           | 10.237                         | 1880.48            | 19250.76           |
| A_68_P26073617 | chr8:96334994-96335038                            | NM_001113384:279         | Gnao1         | INSIDE                 | 1.843                                                        | 6.583                          | 10465.44           | 68894.13           | 12.130                         | 7446.55            | 90329.10           |
| A_68_P26258433 | chr8:129118351-129118402                          | NM_001164598:-1040       | Irf2bp2       | PROMOTER               | 1.843                                                        | 3.789                          | 2286.39            | 8663.45            | 6.982                          | 1790.20            | 12499.77           |

| ProbeName      | Target position of probe on CpG island microarray | TargetID                | GeneSymbol    | CpG island Description | Ratio of relative methylation (TiO <sub>2</sub> -NP/Vehicle) | Sham group                     |                    |                    | TiO <sub>2</sub> -H group      |                    |                    |
|----------------|---------------------------------------------------|-------------------------|---------------|------------------------|--------------------------------------------------------------|--------------------------------|--------------------|--------------------|--------------------------------|--------------------|--------------------|
|                |                                                   |                         |               |                        |                                                              | Relative methylation (Cy5/Cy3) | Cy3 signal (Input) | Cy5 signal (MeDIP) | Relative methylation (Cy5/Cy3) | Cy3 signal (Input) | Cy5 signal (MeDIP) |
| A_68_P3177744  | chr18:65047479-65047523                           | NM_001114386:91         | Nedd41        | INSIDE                 | 1.843                                                        | 10.346                         | 942.70             | 9753.45            | 19.064                         | 714.87             | 13628.62           |
| A_68_P28457438 | chr12:57634665-57634709                           | NM_001146198:1407       | Nkx2-1        | INSIDE                 | 1.843                                                        | 2.491                          | 2084.61            | 5193.37            | 4.591                          | 1654.48            | 7596.10            |
| A_68_P21820797 | chr2:164794239-164794283                          | NM_020333:773           | Stc12a5       | INSIDE                 | 1.843                                                        | 2.128                          | 874.21             | 1860.62            | 3.922                          | 698.46             | 2739.65            |
| A_68_P29718152 | chr14:73952682-73952726                           | NM_011506:112           | Sucla2        | INSIDE                 | 1.843                                                        | 4.831                          | 1652.03            | 7980.50            | 8.905                          | 1393.34            | 12407.05           |
| A_68_P32906197 | A_68_P32906197                                    |                         |               | Unknown                | 1.843                                                        | 5.241                          | 235.53             | 1234.33            | 9.660                          | 181.13             | 1749.76            |
| A_68_P23093082 | chr4:88584489-88584533                            |                         |               | Unknown                | 1.843                                                        | 2.136                          | 260.76             | 556.96             | 3.937                          | 258.24             | 1016.83            |
| A_68_P23253636 | chr4:120527346-120527390                          | ENSMUST00000132895:-52  |               | PROMOTER               | 1.843                                                        | 5.879                          | 13179.14           | 77479.07           | 10.837                         | 9680.76            | 104913.40          |
| A_68_P24004680 | chr5:115017431-115017475                          | NM_001004180:-807       |               | PROMOTER               | 1.842                                                        | 14.251                         | 1361.17            | 19397.40           | 26.247                         | 916.41             | 24053.55           |
| A_68_P24388784 | chr6:40385730-40385774                            | NM_175528:380           | E330009J07Rik | INSIDE                 | 1.842                                                        | 8.401                          | 5482.20            | 46054.93           | 15.474                         | 4148.33            | 64192.08           |
| A_68_P26554373 | chr9:59464987-59465031                            | NM_001205239:-82        | Parp6         | PROMOTER               | 1.842                                                        | 4.992                          | 752.76             | 3758.08            | 9.197                          | 605.13             | 5565.22            |
| A_68_P21556050 | chr2:116946481-116946525                          | NM_033524:-683          | Spred1        | PROMOTER               | 1.842                                                        | 3.294                          | 4864.40            | 16025.06           | 6.069                          | 4099.83            | 24880.16           |
| A_68_P26143096 | chr8:109620241-109620285                          | NM_009353:183           |               | INSIDE                 | 1.842                                                        | 7.143                          | 4769.95            | 34073.04           | 13.156                         | 3569.45            | 46958.07           |
| A_68_P29385917 | chr14:8624251-8624295                             | ENSMUST00000081331:-107 |               | DIVERGENT_PROMOTER     | 1.842                                                        | 2.171                          | 1122.88            | 2438.04            | 4.000                          | 1068.56            | 4274.30            |
| A_68_P26863467 | chr9:117781995-117782039                          | ENSMUST00000126482:-245 |               | PROMOTER               | 1.841                                                        | 2.890                          | 892.04             | 2577.83            | 5.319                          | 690.12             | 3670.96            |
| A_68_P20897790 | chr1:186669470-186669514                          | NM_133684:234           | Mosc2         | INSIDE                 | 1.840                                                        | 1.853                          | 1126.79            | 2088.49            | 3.410                          | 827.00             | 2819.66            |
| A_68_P27168078 | chr10:58786437-58786481                           | NM_011030:415           | P4ha1         | INSIDE                 | 1.840                                                        | 4.803                          | 4662.90            | 22393.81           | 8.836                          | 361.32             | 30584.71           |
| A_68_P20740950 | chr1:157820522-157820566                          | NM_001039184:-159       | Cep350        | PROMOTER               | 1.839                                                        | 2.129                          | 1799.19            | 3830.65            | 3.916                          | 1451.01            | 5682.19            |
| A_68_P25661493 | chr8:12431257-12431301                            | NR_027975:45508         | Gm5607        | INSIDE                 | 1.839                                                        | 6.119                          | 16899.96           | 103403.30          | 11.255                         | 12229.55           | 137644.50          |
| A_68_P32137222 | chr19:45309238-45309283                           | NM_010691:466           | Lbx1          | INSIDE                 | 1.839                                                        | 4.671                          | 1595.40            | 7451.81            | 8.589                          | 1245.19            | 10695.25           |
| A_68_P28086889 | chr11:103611261-103611305                         | NM_011719:-147          | Wnt9b         | PROMOTER               | 1.839                                                        | 4.097                          | 1081.37            | 4430.58            | 7.536                          | 805.24             | 6068.44            |
| A_68_P25727484 | chr8:26629202-26629246                            | NM_001079908:-19        | Fgfr1         | PROMOTER               | 1.838                                                        | 2.463                          | 1456.02            | 3585.62            | 4.527                          | 1219.57            | 5521.00            |
| A_68_P30547082 | chr16:11253796-11253840                           | NM_001130008:600        | Gspt1         | INSIDE                 | 1.838                                                        | 1.881                          | 1209.07            | 2273.78            | 3.456                          | 1042.67            | 3603.49            |
| A_68_P31715736 | chr18:54022224-54022268                           | NM_152809:480           | Csnk1g3       | INSIDE                 | 1.837                                                        | 4.968                          | 577.16             | 2867.29            | 9.127                          | 430.82             | 3931.94            |
| A_68_P24004046 | chr5:114894276-114894320                          | NM_023556:-16           | Mvk           | DIVERGENT_PROMOTER     | 1.837                                                        | 4.580                          | 511.99             | 2345.05            | 8.414                          | 406.64             | 3421.63            |
| A_68_P25088136 | chr7:51808933-51808977                            | NM_009473:339           | Nr1h2         | INSIDE                 | 1.837                                                        | 5.913                          | 15841.82           | 93679.72           | 10.861                         | 11014.63           | 119635.30          |
| A_68_P26017663 | chr8:86545319-86545363                            | NM_028877:-32           | Palm3         | DIVERGENT_PROMOTER     | 1.837                                                        | 4.553                          | 2619.26            | 11926.44           | 8.366                          | 2019.89            | 16899.13           |
| A_68_P29699987 | chr14:70606016-70606060                           | NM_011366:1406          | Sorbs3        | INSIDE                 | 1.837                                                        | 4.285                          | 2648.09            | 11346.76           | 7.872                          | 2086.17            | 16422.34           |
| A_68_P25017170 | chr7:28193438-28193482                            | NM_032610:38148         | Spnb4         | INSIDE                 | 1.837                                                        | 3.254                          | 1617.69            | 5263.61            | 5.977                          | 1239.79            | 7410.37            |
| A_68_P24671729 | chr6:97155626-97155670                            | NM_001111106:-12        | Uba3          | DIVERGENT_PROMOTER     | 1.837                                                        | 4.483                          | 7712.25            | 34570.24           | 8.234                          | 5398.68            | 44452.74           |
| A_68_P21664157 | chr2:136504412-136504456                          |                         |               | Unknown                | 1.837                                                        | 7.495                          | 4216.07            | 31601.16           | 13.766                         | 2972.39            | 40917.96           |
| A_68_P20087502 | chr1:23263626-23263674                            | ENSMUST00000097807:-405 |               | PROMOTER               | 1.837                                                        | 2.686                          | 714.35             | 1918.87            | 4.933                          | 620.39             | 3060.58            |
| A_68_P26820784 | chr9:109778541-109778586                          | NM_007658:481           | Cdc25a        | INSIDE                 | 1.836                                                        | 7.655                          | 2446.19            | 18725.75           | 14.054                         | 1806.42            | 25386.49           |
| A_68_P28221329 | chr12:8309070-8309114                             | NM_013527:-332          | Gdf7          | PROMOTER               | 1.836                                                        | 2.722                          | 5774.15            | 15716.10           | 4.998                          | 4784.64            | 23914.52           |
| A_68_P23590298 | chr5:33995400-33995444                            | NM_009193:-467          | Slbp          | PROMOTER               | 1.836                                                        | 2.597                          | 4361.04            | 11323.66           | 4.766                          | 3399.33            | 16202.53           |
| A_68_P26494143 | chr9:48643240-48643284                            | NM_001033324:788        | Zbtb16        | INSIDE                 | 1.836                                                        | 5.724                          | 2309.58            | 13219.75           | 10.510                         | 1649.43            | 17335.96           |
| A_68_P24111498 | chr5:134575433-134575477                          | NM_030719:-163          | Gatsl2        | PROMOTER               | 1.835                                                        | 4.963                          | 1362.28            | 6761.22            | 9.107                          | 1124.35            | 10239.46           |
| A_68_P25095389 | chr7:53088549-53088593                            | NM_008172:33481         | Grin2d        | INSIDE                 | 1.835                                                        | 6.204                          | 1118.06            | 6936.44            | 11.385                         | 875.81             | 9971.39            |
| A_68_P23264212 | chr4:123341892-123341936                          | NM_001199136:19689      | Macf1         | INSIDE                 | 1.835                                                        | 6.225                          | 2756.08            | 17155.80           | 11.422                         | 2142.75            | 24474.07           |
| A_68_P27080350 | chr10:39452886-39452930                           | NM_011264:943           | Rev3l         | INSIDE                 | 1.835                                                        | 9.042                          | 2510.01            | 22694.51           | 16.596                         | 1771.06            | 29392.16           |
| A_68_P27504343 | chr10:121023890-121023934                         | NM_019786:-62           | Tbk1          | PROMOTER               | 1.835                                                        | 6.046                          | 1165.23            | 7045.24            | 11.095                         | 1100.61            | 12211.23           |
| A_68_P32016047 | chr19:23210802-23210846                           | NM_010638:-4891         | Klf9          | PROMOTER               | 1.834                                                        | 3.797                          | 3494.13            | 13267.89           | 6.963                          | 2747.09            | 19127.36           |
| A_68_P24973639 | chr7:13507675-13507719                            | NM_009095:37            | Rps5          | INSIDE                 | 1.834                                                        | 2.127                          | 320.23             | 681.01             | 3.899                          | 316.64             | 1234.64            |
| A_68_P31560903 | chr18:24761642-24761686                           | NM_139143:654           | Slc39a6       | INSIDE                 | 1.834                                                        | 2.435                          | 2444.17            | 5951.24            | 4.466                          | 2013.51            | 8992.61            |
| A_68_P28752030 | chr12:113959942-113959986                         | NM_001024602:-420       | AW555464      | PROMOTER               | 1.833                                                        | 5.367                          | 1685.78            | 9047.25            | 9.838                          | 1209.79            | 12699.32           |
| A_68_P21897030 | chr2:179177570-179177614                          | NM_009867:410           | Cdh4          | INSIDE                 | 1.833                                                        | 3.684                          | 2559.17            | 9428.91            | 6.755                          | 2105.20            | 14221.06           |
| A_68_P20437267 | chr1:92500071-92500115                            | NM_133805:93            | Cops8         | INSIDE                 | 1.833                                                        | 5.807                          | 2421.48            | 14062.52           | 10.645                         | 1968.22            | 20952.55           |
| A_68_P29445598 | chr14:21001028-21001072                           | NM_021542:-46           | Kenk5         | PROMOTER               | 1.833                                                        | 3.715                          | 4890.28            | 18167.01           | 6.809                          | 3684.25            | 25086.54           |
| A_68_P26818267 | chr9:108998137-108998181                          | NM_172775:209           | Plxnb1        | INSIDE                 | 1.833                                                        | 3.745                          | 978.86             | 3665.46            | 6.864                          | 845.62             | 5804.39            |
| A_68_P32143181 | chr19:46392296-46392341                           | NM_028627:9328          | Psd           | INSIDE                 | 1.833                                                        | 2.663                          | 1490.81            | 3969.84            | 4.881                          | 1320.65            | 6445.94            |
| A_68_P31791603 | chr18:67550248-67550292                           | NM_026473:-114          | Tubb6         | PROMOTER               | 1.833                                                        | 2.112                          | 1364.48            | 2881.84            | 3.872                          | 1120.72            | 4339.74            |
| A_68_P30605892 | chr16:23988103-23988147                           | NM_009744:574           | Bel6          | INSIDE                 | 1.832                                                        | 5.444                          | 3908.90            | 21278.28           | 9.974                          | 3111.28            | 31031.68           |

| ProbeName      | Target position of probe on CpG island microarray | TargetID                | GeneSymbol    | CpG island Description | Ratio of relative methylation (TiO <sub>2</sub> -NP/Vehicle) | Sham group                     |                    |                    | TiO <sub>2</sub> -H group      |                    |                    |
|----------------|---------------------------------------------------|-------------------------|---------------|------------------------|--------------------------------------------------------------|--------------------------------|--------------------|--------------------|--------------------------------|--------------------|--------------------|
|                |                                                   |                         |               |                        |                                                              | Relative methylation (Cy5/Cy3) | Cy3 signal (Input) | Cy5 signal (MeDIP) | Relative methylation (Cy5/Cy3) | Cy3 signal (Input) | Cy5 signal (MeDIP) |
| A_68_P31600224 | chr18:32070540-32070584                           | NM_026006:995           | Sntd3         | INSIDE                 | 1.832                                                        | 5.139                          | 2574.66            | 13231.95           | 9.415                          | 2098.93            | 19762.36           |
| A_68_P21017264 | chr2:13495981-13496025                            | NM_011701:65            | Vim           | INSIDE                 | 1.832                                                        | 3.783                          | 3082.57            | 11659.97           | 6.931                          | 2498.75            | 17319.85           |
| A_68_P31022093 | chr17:6256852-6256896                             | ENSMUST00000121576:2972 |               | DOWNSTREAM             | 1.832                                                        | 3.733                          | 1974.82            | 7371.73            | 6.840                          | 1596.63            | 10920.47           |
| A_68_P21115867 | chr2:32391280-32391324                            | NM_153560:424           | Fam102a       | INSIDE                 | 1.831                                                        | 2.476                          | 1103.59            | 2732.88            | 4.533                          | 852.12             | 3863.05            |
| A_68_P24611767 | chr6:86683275-86683319                            | NM_011818:76            | Gmcl1         | INSIDE                 | 1.831                                                        | 6.282                          | 6492.21            | 40784.11           | 11.502                         | 4673.24            | 53751.74           |
| A_68_P21093574 | chr2:28695671-28695715                            | NM_001166033:188        | Gtf3c4        | INSIDE                 | 1.831                                                        | 6.435                          | 1088.97            | 7007.60            | 11.785                         | 913.34             | 10763.79           |
| A_68_P29117527 | chr13:69878894-69878938                           | NM_001145162:-141       | Ubc2ql1       | PROMOTER               | 1.831                                                        | 1.454                          | 759.42             | 1103.94            | 2.661                          | 644.53             | 1715.34            |
| A_68_P23880187 | chr5:90311691-90311735                            | NM_001081401:647        | Adams3        | INSIDE                 | 1.830                                                        | 5.079                          | 4130.18            | 20975.32           | 9.291                          | 3425.03            | 31823.61           |
| A_68_P30490425 | chr15:101054602-101054646                         | NM_019518:-13           | Grasp         | PROMOTER               | 1.830                                                        | 1.605                          | 841.61             | 1350.63            | 2.937                          | 635.77             | 1867.57            |
| A_68_P21339341 | chr2:74591156-74591200                            | NM_010467:-9858         | Hoxd1         | PROMOTER               | 1.830                                                        | 4.738                          | 3235.33            | 15329.05           | 8.673                          | 2385.13            | 20685.77           |
| A_68_P23399812 | chr4:148681667-148681711                          | NM_207682:119           | Kif1b         | INSIDE                 | 1.830                                                        | 4.570                          | 1413.26            | 6458.18            | 8.364                          | 1189.26            | 9946.59            |
| A_68_P25411827 | chr7:117266477-117266521                          | NM_009516:926           | Wee1          | INSIDE                 | 1.830                                                        | 1.663                          | 628.36             | 1044.80            | 3.043                          | 619.02             | 1883.92            |
| A_68_P20611349 | chr1:132613579-132613625                          | NM_178691:-301          | Yod1          | DIVERGENT_PROMOTER     | 1.830                                                        | 2.158                          | 504.55             | 1088.79            | 3.949                          | 468.83             | 1851.55            |
| A_68_P20720544 | chr1:154247140-154247184                          | NM_177756:166           | Glt25d2       | INSIDE                 | 1.829                                                        | 2.208                          | 4633.39            | 10228.90           | 4.038                          | 3755.72            | 15165.27           |
| A_68_P29023967 | chr13:49311401-49311447                           | NM_026738:-29           | 1110007C09Rik | PROMOTER               | 1.828                                                        | 3.956                          | 6255.04            | 24744.55           | 7.232                          | 4536.90            | 32809.15           |
| A_68_P26890105 | chr9:122478146-122478190                          | NR_015610:-3450         | 9530059014Rik | PROMOTER               | 1.828                                                        | 3.077                          | 1268.86            | 3904.14            | 5.625                          | 1337.99            | 7526.78            |
| A_68_P20351513 | chr1:74998432-74998476                            | NM_010544:-229          | Ihh           | PROMOTER               | 1.828                                                        | 1.985                          | 2593.05            | 5147.28            | 3.629                          | 2305.65            | 8366.79            |
| A_68_P30295269 | chr15:66800435-66800479                           | NM_008681:747           | Ndrp1         | INSIDE                 | 1.828                                                        | 6.584                          | 2811.46            | 18509.54           | 12.036                         | 2244.93            | 27019.44           |
| A_68_P24213704 | chr6:5955887-5955931                              | NM_001191023:280270     | Dyne1l1       | INSIDE                 | 1.827                                                        | 3.203                          | 1241.53            | 3976.49            | 5.851                          | 992.91             | 5809.75            |
| A_68_P21420369 | chr2:90894125-90894169                            | NM_008948:-26           | Psmc3         | PROMOTER               | 1.827                                                        | 5.506                          | 33165.50           | 182611.90          | 10.061                         | 22661.42           | 227992.10          |
| A_68_P20411724 | chr1:88255322-88255366                            | NR_002851:-2442         | Snord82       | PROMOTER               | 1.827                                                        | 5.464                          | 1772.42            | 9685.24            | 9.982                          | 1286.89            | 12845.70           |
| A_68_P23819150 | chr5:77403737-77403781                            | NM_025691:33            | Srp72         | INSIDE                 | 1.827                                                        | 5.143                          | 3782.81            | 19453.76           | 9.396                          | 2820.82            | 26505.70           |
| A_68_P24160101 | chr5:144984767-144984811                          | NM_027410:-341          | Tecpr1        | PROMOTER               | 1.827                                                        | 1.830                          | 1178.84            | 2157.15            | 3.343                          | 846.77             | 2831.13            |
| A_68_P24979381 | chr7:16646861-16646906                            |                         |               | Unknown                | 1.827                                                        | 4.435                          | 3850.42            | 17074.98           | 8.102                          | 2834.25            | 22963.00           |
| A_68_P23797913 | chr5:73883146-73883190                            | NM_001190733:904        | Deun1d4       | INSIDE                 | 1.826                                                        | 10.139                         | 17685.04           | 179306.30          | 18.515                         | 10597.88           | 196224.10          |
| A_68_P27921465 | chr11:74424335-74424379                           | NM_001013784:-8750      | E130309D14Rik | PROMOTER               | 1.826                                                        | 5.392                          | 1636.03            | 8821.58            | 9.847                          | 1314.62            | 12944.86           |
| A_68_P24171749 | chr5:147887960-147888004                          | NM_080795:166           | Lnx2          | INSIDE                 | 1.826                                                        | 3.175                          | 1701.57            | 5403.14            | 5.797                          | 1544.24            | 8952.35            |
| A_68_P26044646 | chr8:91549828-91549872                            | NM_021390:18211         | Sall1         | DOWNSTREAM             | 1.826                                                        | 1.816                          | 777.09             | 1411.38            | 3.317                          | 681.97             | 2261.82            |
| A_68_P28078909 | chr11:102180488-102180532                         | NM_011551:-100          | Ubf1          | PROMOTER               | 1.826                                                        | 2.132                          | 552.33             | 1177.68            | 3.893                          | 399.39             | 1554.76            |
| A_68_P27228617 | chr10:69707740-69707784                           | NM_025807:-261          | Slc16a9       | PROMOTER               | 1.825                                                        | 3.012                          | 3026.06            | 9114.75            | 5.497                          | 2482.91            | 13648.79           |
| A_68_P23444287 | chr5:3341583-3341627                              | NM_009873:-2707         | Cdk6          | PROMOTER               | 1.824                                                        | 3.467                          | 2545.92            | 8825.46            | 6.323                          | 1807.56            | 11428.91           |
| A_68_P29053522 | chr13:55254151-55254195                           | NM_008011:-6            | Fgfr4         | PROMOTER               | 1.824                                                        | 5.512                          | 1658.26            | 9140.76            | 10.054                         | 1504.20            | 15122.59           |
| A_68_P20187367 | chr1:43220695-43220739                            | NM_010212:90            | Fhl2          | INSIDE                 | 1.824                                                        | 6.556                          | 1156.88            | 7584.06            | 11.958                         | 1018.56            | 12180.28           |
| A_68_P25010202 | chr7:26180987-26181031                            | NM_010719:-2            | Lipe          | PROMOTER               | 1.824                                                        | 3.873                          | 4065.25            | 15743.27           | 7.063                          | 3161.08            | 22325.43           |
| A_68_P27171931 | chr10:59465553-59465597                           | NM_026937:22            | Ascc1         | INSIDE                 | 1.823                                                        | 3.303                          | 1913.76            | 6322.08            | 6.023                          | 1652.32            | 9952.06            |
| A_68_P32567806 | chrX:99447101-99447145                            | NM_007709:-14           | Cited1        | PROMOTER               | 1.823                                                        | 2.299                          | 570.23             | 1310.75            | 4.190                          | 323.08             | 1353.75            |
| A_68_P32140683 | chr19:45890581-45890625                           | NM_030716:-309          | Kenip2        | PROMOTER               | 1.823                                                        | 1.932                          | 2746.60            | 5307.61            | 3.524                          | 2147.02            | 7565.05            |
| A_68_P21418380 | chr2:90519239-90519283                            | NM_021512:1889          | Nup160        | INSIDE                 | 1.823                                                        | 5.490                          | 7728.86            | 42429.44           | 10.009                         | 6169.66            | 61751.11           |
| A_68_P30489504 | chr15:100908526-100908570                         | AK078004:-921           |               | PROMOTER               | 1.823                                                        | 1.626                          | 3698.21            | 6011.74            | 2.964                          | 2761.17            | 8183.88            |
| A_68_P32572442 | chrX:100551806-100551850                          | NM_009767:14            | Chic1         | INSIDE                 | 1.822                                                        | 3.938                          | 3190.05            | 12563.39           | 7.174                          | 1466.11            | 10517.46           |
| A_68_P22319359 | chr3:89234506-89234550                            | NM_026869:-230          | Pygo2         | PROMOTER               | 1.822                                                        | 4.307                          | 2831.88            | 12197.24           | 7.846                          | 2355.22            | 18479.47           |
| A_68_P27468929 | chr10:114752147-114752191                         | NM_024454:479           | Rab21         | INSIDE                 | 1.822                                                        | 1.708                          | 878.80             | 1500.72            | 3.111                          | 731.83             | 2276.69            |
| A_68_P31929627 | chr19:5602038-5602082                             | NM_026616:188           | Rnash2c       | INSIDE                 | 1.822                                                        | 5.312                          | 2264.08            | 12027.24           | 9.679                          | 1871.49            | 18114.83           |
| A_68_P26344894 | chr9:20780852-20780896                            | NM_010333:363           | S1pr2         | INSIDE                 | 1.822                                                        | 15.703                         | 5257.87            | 82562.47           | 28.611                         | 3131.07            | 89583.18           |
| A_68_P31097620 | chr17:24626114-24626158                           | NM_027937:409           | Caskin1       | INSIDE                 | 1.821                                                        | 1.379                          | 1840.28            | 2537.41            | 2.510                          | 1442.13            | 3620.09            |
| A_68_P21497226 | chr2:105744559-105744603                          | NM_023876:77            | Elp4          | INSIDE                 | 1.821                                                        | 4.077                          | 3355.27            | 13680.51           | 7.425                          | 2790.48            | 20720.57           |
| A_68_P23314731 | chr4:132478927-132478977                          | NM_001163792:-486       | Fam76a        | PROMOTER               | 1.821                                                        | 2.349                          | 1010.77            | 2374.41            | 4.277                          | 696.91             | 2980.48            |
| A_68_P28066375 | chr11:100006570-100006614                         | NM_008471:641           | Krt19         | INSIDE                 | 1.821                                                        | 2.693                          | 5241.41            | 14114.38           | 4.905                          | 4115.85            | 20188.17           |
| A_68_P31336379 | chr17:72131880-72131924                           | NM_030179:616           | Clip4         | INSIDE                 | 1.820                                                        | 4.744                          | 765.70             | 3632.43            | 8.635                          | 671.28             | 5796.46            |
| A_68_P27756942 | chr11:44432030-44432075                           | NM_007897:417           | Ebf1          | INSIDE                 | 1.820                                                        | 1.507                          | 645.68             | 973.03             | 2.742                          | 504.33             | 1383.01            |
| A_68_P23250319 | chr4:119941839-119941885                          | NM_194060:18004         | Foxo6         | INSIDE                 | 1.820                                                        | 3.106                          | 574.76             | 1785.39            | 5.655                          | 460.56             | 2604.27            |

| ProbeName      | Target position of probe on CpG island microarray | TargetID                | GeneSymbol    | CpG island Description | Ratio of relative methylation (TiO <sub>2</sub> -NP/Vehicle) | Sham group                                             |                               |                               | TiO <sub>2</sub> -H group                              |                               |                               |
|----------------|---------------------------------------------------|-------------------------|---------------|------------------------|--------------------------------------------------------------|--------------------------------------------------------|-------------------------------|-------------------------------|--------------------------------------------------------|-------------------------------|-------------------------------|
|                |                                                   |                         |               |                        |                                                              | Relative methylation (C <sub>5</sub> /C <sub>3</sub> ) | C <sub>3</sub> signal (Input) | C <sub>5</sub> signal (MeDIP) | Relative methylation (C <sub>5</sub> /C <sub>3</sub> ) | C <sub>3</sub> signal (Input) | C <sub>5</sub> signal (MeDIP) |
| A_68_P24064307 | chr5:125507269-125507313                          | NM_011424:152294        | Ncor2         | INSIDE                 | 1.820                                                        | 5.340                                                  | 9566.43                       | 51080.29                      | 9.717                                                  | 7206.32                       | 70024.62                      |
| A_68_P24771681 | chr6:115494875-115494919                          | NM_199033:175           | Tsen2         | INSIDE                 | 1.820                                                        | 7.577                                                  | 2438.08                       | 18473.32                      | 13.787                                                 | 1654.35                       | 22808.57                      |
| A_68_P24152591 | chr5:143105523-143105567                          | NM_178398:7             | Wipi2         | INSIDE                 | 1.820                                                        | 3.101                                                  | 1127.27                       | 3495.87                       | 5.644                                                  | 958.11                        | 5407.37                       |
| A_68_P22630575 | chr3:148652818-148652862                          | ENSMUST00000098518:-560 |               | PROMOTER               | 1.820                                                        | 9.814                                                  | 1470.88                       | 14435.63                      | 17.863                                                 | 1052.46                       | 18800.46                      |
| A_68_P20726280 | chr1:155180208-155180252                          | NM_010683:-314          | Lame1         | PROMOTER               | 1.819                                                        | 7.614                                                  | 27733.70                      | 211155.70                     | 13.851                                                 | 15482.40                      | 214448.20                     |
| A_68_P30363283 | chr15:78765483-78765527                           | NM_133800:142           | Nol12         | INSIDE                 | 1.819                                                        | 3.125                                                  | 1896.06                       | 5924.42                       | 5.685                                                  | 1496.31                       | 8506.16                       |
| A_68_P28442990 | chr12:54808173-54808232                           | NM_013780:458539        | Npas3         | INSIDE                 | 1.819                                                        | 5.224                                                  | 899.58                        | 4699.41                       | 9.504                                                  | 716.61                        | 6810.66                       |
| A_68_P25011329 | chr7:26472470-26472514                            | NM_011577:472           | Tgfb1         | INSIDE                 | 1.819                                                        | 2.718                                                  | 5512.94                       | 14984.39                      | 4.943                                                  | 4060.73                       | 20072.39                      |
| A_68_P27630622 | chr11:20149303-20149348                           | NM_172260:102           | Cep68         | INSIDE                 | 1.818                                                        | 6.231                                                  | 2082.62                       | 12977.22                      | 11.331                                                 | 1861.11                       | 21088.80                      |
| A_68_P32378028 | chrX:49034553-49034597                            | NM_015819:-920          | Hs6st2        | PROMOTER               | 1.818                                                        | 2.100                                                  | 1353.54                       | 2842.92                       | 3.817                                                  | 739.84                        | 2824.33                       |
| A_68_P31130464 | chr17:30025085-30025129                           | NM_001081160:-279       | Mdga1         | PROMOTER               | 1.818                                                        | 4.836                                                  | 2874.13                       | 13899.56                      | 8.792                                                  | 2325.88                       | 20449.59                      |
| A_68_P28449264 | chr12:55896516-55896560                           | NM_026998:111           | Snx6          | INSIDE                 | 1.818                                                        | 4.739                                                  | 1566.84                       | 7425.23                       | 8.616                                                  | 1292.67                       | 11137.82                      |
| A_68_P29080191 | chr13:59658571-59658615                           | NM_023328:88            | Agtpbp1       | INSIDE                 | 1.817                                                        | 6.266                                                  | 4305.05                       | 26975.86                      | 11.388                                                 | 3358.48                       | 38245.19                      |
| A_68_P20405120 | chr1:84692097-84692141                            | NM_152915:678           | Dner          | INSIDE                 | 1.817                                                        | 2.089                                                  | 1042.51                       | 2177.44                       | 3.794                                                  | 810.47                        | 3075.12                       |
| A_68_P21345223 | chr2:75497311-75497355                            | NR_033513:-14           | Gm6793        | PROMOTER               | 1.817                                                        | 3.214                                                  | 715.56                        | 2299.70                       | 5.840                                                  | 502.90                        | 2936.75                       |
| A_68_P31412114 | chr17:86086928-86086972                           | NM_011380:644           | Six2          | INSIDE                 | 1.817                                                        | 4.305                                                  | 1547.01                       | 6659.82                       | 7.824                                                  | 1263.46                       | 9885.38                       |
| A_68_P24134133 | chr5:139676870-139676914                          | NM_024451:269           | Sun1          | INSIDE                 | 1.817                                                        | 1.607                                                  | 767.61                        | 1233.68                       | 2.920                                                  | 1083.62                       | 3164.28                       |
| A_68_P29024152 | chr13:49343166-49343210                           | NM_025491:344           | Susd3         | INSIDE                 | 1.817                                                        | 1.837                                                  | 1441.29                       | 2648.13                       | 3.338                                                  | 1207.12                       | 4029.69                       |
| A_68_P23196094 | chr4:108132526-108132570                          | NM_175472:518           | Zecch11       | INSIDE                 | 1.817                                                        | 10.177                                                 | 5197.71                       | 52899.47                      | 18.496                                                 | 3681.07                       | 68086.84                      |
| A_68_P23201928 | chr4:109330089-10933133                           | NM_007671:7867          | Cdkn2c        | DOWNSTREAM             | 1.816                                                        | 2.840                                                  | 954.42                        | 2710.40                       | 5.157                                                  | 785.33                        | 4050.01                       |
| A_68_P27163123 | chr10:57786395-57786439                           | NM_026148:203           | Lims1         | INSIDE                 | 1.816                                                        | 4.775                                                  | 3182.08                       | 15193.93                      | 8.672                                                  | 2345.80                       | 20343.02                      |
| A_68_P24053482 | chr5:123464905-123464949                          | NM_175423:-156          | Orai1         | PROMOTER               | 1.816                                                        | 2.677                                                  | 906.36                        | 2426.00                       | 4.861                                                  | 846.86                        | 4116.84                       |
| A_68_P22317129 | chr3:88894411-88894455                            | NM_001083808:-479       | Rusc1         | PROMOTER               | 1.816                                                        | 3.505                                                  | 2746.83                       | 9627.80                       | 6.364                                                  | 2121.72                       | 13503.65                      |
| A_68_P24631649 | chr6:90275213-90275257                            | NM_027928:-55           | Chst13        | DIVERGENT_PROMOTER     | 1.815                                                        | 1.643                                                  | 880.04                        | 1445.53                       | 2.982                                                  | 709.33                        | 2115.11                       |
| A_68_P21909702 | chr2:181022305-181022349                          | NM_198169:345           | Gmeb2         | INSIDE                 | 1.815                                                        | 1.560                                                  | 1875.56                       | 2926.55                       | 2.832                                                  | 1427.15                       | 4041.51                       |
| A_68_P24784006 | chr6:117866996-117867040                          | NM_001166427:-293       | Hnrnpf        | PROMOTER               | 1.815                                                        | 3.705                                                  | 2777.20                       | 10289.67                      | 6.726                                                  | 2018.60                       | 13576.17                      |
| A_68_P26346115 | chr9:21043701-21043745                            | NM_001110305:54         | Keap1         | INSIDE                 | 1.815                                                        | 1.799                                                  | 2047.85                       | 3683.26                       | 3.264                                                  | 1688.13                       | 5510.34                       |
| A_68_P24764867 | chr6:114233070-114233114                          | NM_178703:464           | Slc6a1        | INSIDE                 | 1.815                                                        | 2.185                                                  | 1964.99                       | 4292.57                       | 3.964                                                  | 1703.19                       | 6751.78                       |
| A_68_P26804662 | chr9:106587823-106587867                          | NM_011573:154           | Tex264        | INSIDE                 | 1.815                                                        | 2.861                                                  | 632.52                        | 1809.56                       | 5.192                                                  | 463.35                        | 2405.94                       |
| A_68_P26232970 | chr8:124900378-124900422                          | NM_001029993:-115       | Zc3h18        | PROMOTER               | 1.815                                                        | 4.101                                                  | 833.27                        | 3417.54                       | 7.443                                                  | 688.30                        | 5123.13                       |
| A_68_P28050431 | chr11:97276806-97276850                           | ENSMUST00000121799:-18  |               | PROMOTER               | 1.815                                                        | 3.825                                                  | 2894.65                       | 11072.80                      | 6.942                                                  | 2139.59                       | 14852.50                      |
| A_68_P30361566 | chr15:78503626-78503670                           | NM_183141:44895         | Elfn2         | INSIDE                 | 1.814                                                        | 6.596                                                  | 1520.94                       | 10032.69                      | 11.964                                                 | 1350.77                       | 16160.51                      |
| A_68_P25644699 | chr8:9770615-9770659                              | NM_173446:387           | Fam155a       | INSIDE                 | 1.814                                                        | 5.687                                                  | 3346.03                       | 19027.70                      | 10.313                                                 | 2684.47                       | 27685.74                      |
| A_68_P31311922 | chr17:67703725-67703769                           | NM_008984:53            | Ptpm          | INSIDE                 | 1.814                                                        | 7.137                                                  | 1696.55                       | 12107.99                      | 12.949                                                 | 1365.94                       | 17687.68                      |
| A_68_P23457345 | chr5:5749151-5749195                              | NM_027399:145           | Steap1        | INSIDE                 | 1.814                                                        | 5.963                                                  | 5147.22                       | 30691.20                      | 10.818                                                 | 4433.72                       | 47962.54                      |
| A_68_P24383759 | chr6:39523831-39523875                            | NM_178873:-22           | Adck2         | PROMOTER               | 1.813                                                        | 3.292                                                  | 2014.29                       | 6630.83                       | 5.969                                                  | 1485.03                       | 8863.72                       |
| A_68_P22317617 | chr3:88973343-88973387                            | NM_001163432:4638       | Clk2          | INSIDE                 | 1.813                                                        | 7.739                                                  | 6628.02                       | 51296.66                      | 14.031                                                 | 4272.64                       | 59947.78                      |
| A_68_P28396964 | chr12:45311296-45311340                           | NM_013760:-263          | Dnajb9        | PROMOTER               | 1.813                                                        | 1.965                                                  | 1056.58                       | 2076.00                       | 3.562                                                  | 892.34                        | 3178.07                       |
| A_68_P21722817 | chr2:147019650-147019694                          | NM_001077632:-7534      | Nkx2-2        | PROMOTER               | 1.813                                                        | 2.371                                                  | 1751.40                       | 4151.79                       | 4.299                                                  | 1341.88                       | 5768.45                       |
| A_68_P32183826 | chr19:53751832-53751876                           | NM_001170847:59         | Rbm20         | INSIDE                 | 1.813                                                        | 6.095                                                  | 2886.04                       | 17589.61                      | 11.050                                                 | 2309.40                       | 25517.88                      |
| A_68_P22128834 | chr3:51080739-51080783                            | NM_023502:49149         | Ehf2          | INSIDE                 | 1.812                                                        | 5.068                                                  | 3293.52                       | 16690.08                      | 9.184                                                  | 2567.56                       | 23580.83                      |
| A_68_P32016039 | chr19:23209957-23210001                           | NM_010638:-5737         | Klf9          | PROMOTER               | 1.812                                                        | 4.846                                                  | 4436.94                       | 21499.29                      | 8.780                                                  | 3414.58                       | 29979.51                      |
| A_68_P23544552 | chr5:24414202-24414246                            | NM_001170555:103        | Prkag2        | INSIDE                 | 1.812                                                        | 7.118                                                  | 8413.99                       | 59892.39                      | 12.900                                                 | 7495.71                       | 96696.36                      |
| A_68_P27833411 | chr11:58717772-58717816                           | NM_011758:-67           | Zfp39         | PROMOTER               | 1.812                                                        | 5.846                                                  | 8399.74                       | 49106.03                      | 10.592                                                 | 6079.29                       | 64392.64                      |
| A_68_P29703311 | A_68_P29703311                                    |                         | Unknown       |                        | 1.812                                                        | 7.959                                                  | 3332.17                       | 26519.53                      | 14.422                                                 | 2490.01                       | 35910.79                      |
| A_68_P31019376 | A_68_P31019376                                    |                         | Unknown       |                        | 1.812                                                        | 3.074                                                  | 1463.58                       | 4499.53                       | 5.571                                                  | 1156.81                       | 6444.19                       |
| A_68_P31961511 | chr19:12670617-12670661                           | NR_015503:418           | A330040F15Rik | INSIDE                 | 1.811                                                        | 6.470                                                  | 2292.64                       | 14834.32                      | 11.717                                                 | 1846.29                       | 21632.64                      |
| A_68_P31790565 | chr18:67365128-67365172                           | NM_024190:138           | Chmp1b        | INSIDE                 | 1.811                                                        | 3.225                                                  | 4755.01                       | 15334.68                      | 5.839                                                  | 3568.63                       | 20838.37                      |
| A_68_P32464984 | chrX:71070091-71070135                            | NM_001029868:196        | Pdzd4         | INSIDE                 | 1.811                                                        | 4.937                                                  | 765.24                        | 3778.22                       | 8.939                                                  | 576.34                        | 5152.02                       |
| A_68_P30927986 | chr16:85173922-85173966                           | NM_001198823:8          | App           | INSIDE                 | 1.810                                                        | 4.246                                                  | 1445.59                       | 6137.72                       | 7.684                                                  | 1257.78                       | 9665.34                       |
| A_68_P29699040 | chr14:70480133-70480177                           | NM_018781:2903          | Egr3          | DOWNSTREAM             | 1.810                                                        | 6.388                                                  | 3054.13                       | 19508.73                      | 11.561                                                 | 2484.02                       | 28717.76                      |

| ProbeName      | Target position of probe on CpG island microarray | TargetID                | GeneSymbol    | CpG island Description | Ratio of relative methylation (TiO <sub>2</sub> -NP/Vehicle) | Sham group                     |                    |                    | TiO <sub>2</sub> -H group      |                    |                    |
|----------------|---------------------------------------------------|-------------------------|---------------|------------------------|--------------------------------------------------------------|--------------------------------|--------------------|--------------------|--------------------------------|--------------------|--------------------|
|                |                                                   |                         |               |                        |                                                              | Relative methylation (Cy5/Cy3) | Cy3 signal (Input) | Cy5 signal (MeDIP) | Relative methylation (Cy5/Cy3) | Cy3 signal (Input) | Cy5 signal (MeDIP) |
| A_68_P22724519 | chr10:77945016-77945060                           | ENSMUST00000069431:5549 |               | DOWNSTREAM             | 1.810                                                        | 1.673                          | 1145.55            | 1916.89            | 3.028                          | 1011.16            | 3061.94            |
| A_68_P28684687 | chr12:102146364-102146408                         | NM_001177674:-8652      | Gpr68         | PROMOTER               | 1.809                                                        | 3.695                          | 1650.80            | 6100.38            | 6.684                          | 1533.07            | 10246.92           |
| A_68_P21339240 | chr2:74578542-74578586                            | NM_010468:28515         | Hoxd3         | INSIDE                 | 1.809                                                        | 2.036                          | 1647.74            | 3355.21            | 3.683                          | 1258.03            | 4633.65            |
| A_68_P23094194 | chr4:88783218-88783262                            | NM_024433:-33           | Mtap          | PROMOTER               | 1.809                                                        | 3.549                          | 5045.36            | 17904.92           | 6.418                          | 3622.40            | 23275.54           |
| A_68_P20134295 | chr1:33727422-33727466                            | NR_033199:776           | 1700001G17Rik | INSIDE                 | 1.808                                                        | 8.194                          | 2704.50            | 22161.41           | 14.814                         | 1913.03            | 28339.87           |
| A_68_P30476326 | chr15:98593248-98593292                           | NM_007478:279           | Arf3          | INSIDE                 | 1.808                                                        | 1.391                          | 2235.94            | 3111.08            | 2.516                          | 1636.95            | 4118.23            |
| A_68_P32260334 | chrX:11664151-11664195                            | NM_029510:-6493         | Beor          | PROMOTER               | 1.808                                                        | 2.229                          | 1356.47            | 3024.10            | 4.031                          | 815.61             | 3287.47            |
| A_68_P22338541 | chr3:94168285-94168329                            | NM_001136117:1941       | C2cd4d        | INSIDE                 | 1.808                                                        | 5.376                          | 5230.63            | 28118.47           | 9.722                          | 4155.52            | 40398.62           |
| A_68_P28990871 | chr13:43655098-43655142                           | NM_001081059:440        | Ccdc90a       | INSIDE                 | 1.808                                                        | 4.884                          | 2329.94            | 11379.26           | 8.831                          | 1930.50            | 17047.94           |
| A_68_P25954496 | chr8:73376577-73376621                            | NM_032397:4309          | Kenn1         | INSIDE                 | 1.808                                                        | 5.381                          | 1881.59            | 10125.04           | 9.727                          | 1305.40            | 12698.01           |
| A_68_P26985109 | chr10:19868572-19868616                           | NM_001198635:-131       | Mtap7         | PROMOTER               | 1.808                                                        | 5.214                          | 1052.75            | 5489.10            | 9.426                          | 892.38             | 8411.77            |
| A_68_P30000055 | chr15:8395316-8395364                             | NM_027707:-877          | Nipbl         | PROMOTER               | 1.807                                                        | 10.334                         | 11522.38           | 119074.30          | 18.676                         | 6922.61            | 129285.00          |
| A_68_P27965931 | chr11:82202507-82202551                           | NM_023438:127           | Tmem132e      | INSIDE                 | 1.807                                                        | 5.438                          | 5787.76            | 31475.98           | 9.825                          | 4556.78            | 44770.51           |
| A_68_P24638016 | chr6:91235548-91235592                            |                         |               | Unknown                | 1.807                                                        | 3.859                          | 1017.61            | 3927.24            | 6.973                          | 821.14             | 5725.42            |
| A_68_P24992765 | chr7:19927675-19927719                            | NM_001127324:-2723      | Ercc1         | PROMOTER               | 1.806                                                        | 8.013                          | 991.82             | 7947.64            | 14.469                         | 840.64             | 12163.27           |
| A_68_P21765995 | chr2:155340656-155340700                          | NM_144786:-96           | Ggt7          | DIVERGENT_PROMOTER     | 1.806                                                        | 2.951                          | 1077.94            | 3180.74            | 5.328                          | 842.32             | 4487.81            |
| A_68_P30556199 | chr16:13256418-13256462                           | NM_001122667:-133       | Mkl2          | PROMOTER               | 1.806                                                        | 2.014                          | 1559.34            | 3140.77            | 3.637                          | 1310.82            | 4767.44            |
| A_68_P32150744 | chr19:47653811-47653855                           | NM_001164639:-676       | Slk           | PROMOTER               | 1.806                                                        | 1.474                          | 1101.74            | 1624.42            | 2.663                          | 969.80             | 2583.01            |
| A_68_P25502305 | chr7:133942445-133942489                          | NM_001177307:226        | Aldoa         | INSIDE                 | 1.805                                                        | 2.341                          | 2242.61            | 5249.11            | 4.224                          | 1800.05            | 7603.52            |
| A_68_P22085575 | chr3:41369640-41369684                            | NM_001130186:861        | Phf17         | INSIDE                 | 1.805                                                        | 7.734                          | 1394.73            | 10786.45           | 13.960                         | 1101.00            | 15370.41           |
| A_68_P30346613 | chr15:76011583-76011627                           | NM_201394:14536         | Plec          | INSIDE                 | 1.805                                                        | 1.900                          | 565.89             | 1075.26            | 3.429                          | 411.97             | 1412.72            |
| A_68_P28426162 | chr12:51750316-51750360                           | NM_008858:-128          | Prkd1         | PROMOTER               | 1.804                                                        | 2.988                          | 3996.06            | 11938.92           | 5.389                          | 3237.18            | 17445.42           |
| A_68_P27635752 | chr11:21139299-21139343                           | NM_139061:429           | Vps54         | INSIDE                 | 1.804                                                        | 4.071                          | 1720.94            | 7005.72            | 7.344                          | 1344.29            | 9872.08            |
| A_68_P25581873 | chr7:147222902-147222946                          | NM_027201:635           | Zfp511        | INSIDE                 | 1.804                                                        | 2.157                          | 2142.84            | 4623.02            | 3.891                          | 1510.89            | 5879.04            |
| A_68_P31782005 | chr18:65740650-65740694                           | NM_207255:789           | Zfp532        | INSIDE                 | 1.804                                                        | 4.365                          | 4337.80            | 18933.93           | 7.874                          | 3516.66            | 27688.88           |
| A_68_P33012150 | chr9_random:53992-54036                           | NR_027950:-678          | 4930526115Rik | PROMOTER               | 1.803                                                        | 7.605                          | 24634.84           | 187359.00          | 13.714                         | 15139.21           | 207618.50          |
| A_68_P27975235 | chr11:83881690-83881734                           | NM_019819:147           | Dusp14        | INSIDE                 | 1.803                                                        | 2.054                          | 1290.16            | 2649.80            | 3.702                          | 1035.86            | 3834.90            |
| A_68_P25910880 | chr8:64070053-64070097                            | NM_001081390:311413     | Palld         | INSIDE                 | 1.803                                                        | 5.859                          | 3203.60            | 18770.66           | 10.564                         | 2389.29            | 25240.59           |
| A_68_P26464017 | chr9:43611785-43611829                            | NM_021424:59148         | Pvrl1         | INSIDE                 | 1.803                                                        | 5.219                          | 1554.17            | 8111.24            | 9.408                          | 1038.88            | 9773.69            |
| A_68_P25576307 | chr7:146374240-146374284                          | NM_021302:131           | Stk32c        | INSIDE                 | 1.803                                                        | 4.492                          | 1127.51            | 5065.01            | 8.099                          | 961.82             | 7790.11            |
| A_68_P31124371 | chr17:28938550-28938594                           | NM_001081315:502        | Brpf3         | INSIDE                 | 1.802                                                        | 6.412                          | 13892.16           | 89073.98           | 11.552                         | 9383.17            | 108395.60          |
| A_68_P25780173 | chr8:36558550-36558594                            | NM_026067:15            | Eri1          | INSIDE                 | 1.802                                                        | 2.449                          | 747.61             | 1830.80            | 4.413                          | 663.58             | 2928.45            |
| A_68_P30246699 | chr15:58046420-58046464                           | NM_026346:-9            | Fbxo32        | PROMOTER               | 1.802                                                        | 1.596                          | 1220.54            | 1947.77            | 2.876                          | 1004.10            | 2888.22            |
| A_68_P23392700 | chr4:147525826-147525870                          | NM_001163704:186        | Fbxo6         | INSIDE                 | 1.802                                                        | 5.283                          | 4542.00            | 23995.44           | 9.522                          | 3913.81            | 37267.97           |
| A_68_P21420493 | chr2:90910689-90910733                            | NM_026721:-332          | Slc39a13      | PROMOTER               | 1.802                                                        | 3.480                          | 3319.90            | 11553.43           | 6.269                          | 2783.38            | 17450.22           |
| A_68_P21438071 | chr2:93797315-93797359                            | NM_001145034:-79        | Gm13889       | PROMOTER               | 1.801                                                        | 2.816                          | 3220.82            | 9068.87            | 5.071                          | 2565.75            | 13010.32           |
| A_68_P31781218 | chr18:65590541-65590585                           | NM_172833:-88           | Malt1         | PROMOTER               | 1.801                                                        | 4.774                          | 13185.43           | 62940.98           | 8.596                          | 9108.70            | 78301.18           |
| A_68_P21261140 | chr2:60719287-60719331                            | NM_001141931:187        | Rbms1         | INSIDE                 | 1.801                                                        | 2.769                          | 209.34             | 579.69             | 4.988                          | 235.88             | 1176.47            |
| A_68_P21580978 | chr2:121275537-121275581                          | NM_011354:595           | Serf2         | INSIDE                 | 1.801                                                        | 2.582                          | 3099.68            | 8003.43            | 4.651                          | 2734.38            | 12717.10           |
| A_68_P30605897 | chr16:23988863-23988907                           | NM_009744:-186          | Bel6          | PROMOTER               | 1.800                                                        | 15.406                         | 1820.78            | 28050.26           | 27.729                         | 1472.85            | 40839.93           |
| A_68_P29713892 | chr14:73109778-73109822                           | NM_207636:10            | Fndc3a        | INSIDE                 | 1.800                                                        | 3.666                          | 15386.09           | 56402.37           | 6.598                          | 12880.93           | 84987.90           |
| A_68_P31258174 | chr17:56896255-56896299                           | NM_008738:677           | Nrtn          | INSIDE                 | 1.800                                                        | 9.627                          | 1392.79            | 13407.73           | 17.330                         | 1188.08            | 20589.48           |
| A_68_P23999133 | chr5:114064391-114064435                          | NM_008153:35987         | Cmklr1        | INSIDE                 | 1.799                                                        | 5.553                          | 1505.92            | 8362.64            | 9.989                          | 1033.77            | 10325.81           |
| A_68_P31620539 | chr18:36020271-36020315                           | NM_133687:30821         | Cxcs5         | INSIDE                 | 1.799                                                        | 4.958                          | 1846.83            | 9156.90            | 8.922                          | 1356.72            | 12104.51           |
| A_68_P21278824 | chr2:63936695-63936739                            | NM_021716:-647          | Fign          | PROMOTER               | 1.799                                                        | 1.562                          | 572.22             | 893.92             | 2.810                          | 476.20             | 1338.03            |
| A_68_P30349539 | chr15:76462358-76462402                           | NM_183091:7979          | Tonsl         | INSIDE                 | 1.799                                                        | 6.542                          | 8551.76            | 55942.93           | 11.767                         | 6017.12            | 70801.82           |
| A_68_P29257361 | chr13:99161507-99161552                           | BC059100:739690         |               | INSIDE                 | 1.799                                                        | 5.081                          | 3273.53            | 16631.91           | 9.141                          | 2534.57            | 23167.47           |
| A_68_P24004989 | chr5:115060757-115060801                          | NM_001004180:42519      | BC057022      | INSIDE                 | 1.798                                                        | 4.701                          | 4257.35            | 20015.41           | 8.454                          | 3149.22            | 26623.86           |
| A_68_P24449229 | chr6:52175914-52175958                            | NM_010456:1433          | Hoxa9         | INSIDE                 | 1.798                                                        | 1.819                          | 1546.09            | 2811.78            | 3.269                          | 1279.83            | 4184.40            |
| A_68_P28236792 | chr12:11157416-11157460                           | NM_173417:-259          | Kcns3         | PROMOTER               | 1.798                                                        | 12.300                         | 3004.88            | 36959.76           | 22.110                         | 2237.03            | 49461.30           |
| A_68_P32050808 | chr19:29122130-29122174                           | NR_028360:180           | 1700018L02Rik | INSIDE                 | 1.797                                                        | 3.071                          | 3532.99            | 10850.38           | 5.520                          | 2811.40            | 15519.09           |

| ProbeName      | Target position of probe on CpG island microarray | TargetID                 | GeneSymbol    | CpG island Description | Ratio of relative methylation (TiO <sub>2</sub> -NP/Vehicle) | Sham group                     |                    |                    | TiO <sub>2</sub> -H group      |                    |                    |
|----------------|---------------------------------------------------|--------------------------|---------------|------------------------|--------------------------------------------------------------|--------------------------------|--------------------|--------------------|--------------------------------|--------------------|--------------------|
|                |                                                   |                          |               |                        |                                                              | Relative methylation (Cy5/Cy3) | Cy3 signal (Input) | Cy5 signal (MeDIP) | Relative methylation (Cy5/Cy3) | Cy3 signal (Input) | Cy5 signal (MeDIP) |
| A_68_P27810090 | chr11:54251929-54251973                           | NM_173753:270            | Fnip1         | INSIDE                 | 1.797                                                        | 3.055                          | 1965.54            | 6005.08            | 5.491                          | 1626.28            | 8930.19            |
| A_68_P21765994 | chr2:155340501-155340545                          | NM_144786:60             | Ggt7          | INSIDE                 | 1.797                                                        | 1.723                          | 1515.62            | 2611.59            | 3.096                          | 1202.00            | 3721.77            |
| A_68_P31933357 | chr19:6235648-6235692                             | NM_198168:170            | Ppp2r5b       | INSIDE                 | 1.796                                                        | 1.849                          | 688.63             | 1273.17            | 3.320                          | 592.64             | 1967.48            |
| A_68_P22383780 | chr3:102799614-102799658                          | NM_025679:-26            | Sike1         | PROMOTER               | 1.796                                                        | 1.652                          | 1622.33            | 2680.09            | 2.967                          | 1345.94            | 3993.37            |
| A_68_P21147548 | chr2:38195289-38195333                            | ENSMUST00000133661:-1301 |               | PROMOTER               | 1.796                                                        | 2.717                          | 1425.62            | 3873.62            | 4.880                          | 1225.15            | 5978.96            |
| A_68_P29656173 | chr14:63174404-63174448                           | ENSMUST00000162987:-147  |               | PROMOTER               | 1.796                                                        | 1.704                          | 6632.57            | 11303.29           | 3.060                          | 4694.28            | 14364.54           |
| A_68_P25708990 | chr8:23170949-23170993                            | NM_183142:-221           | Alg11         | DIVERGENT_PROMOTER     | 1.795                                                        | 2.373                          | 2983.00            | 7078.50            | 4.259                          | 2521.59            | 10738.91           |
| A_68_P32117489 | chr19:41921912-41921956                           | NM_177603:688            | Frat2         | INSIDE                 | 1.795                                                        | 3.395                          | 963.77             | 3271.91            | 6.093                          | 735.76             | 4482.62            |
| A_68_P30139530 | chr15:36539045-36539089                           | NM_008774:-338           | Pabpc1        | PROMOTER               | 1.795                                                        | 1.615                          | 1468.37            | 2370.92            | 2.898                          | 1265.04            | 3665.54            |
| A_68_P20800091 | chr1:168339580-168339624                          | NM_001142948:357         | Pogk          | INSIDE                 | 1.795                                                        | 4.313                          | 8825.38            | 38061.16           | 7.740                          | 6802.34            | 52653.14           |
| A_68_P21782725 | chr2:158235581-158235625                          | NM_177658:14             | Ralgapb       | INSIDE                 | 1.795                                                        | 2.817                          | 1325.13            | 3733.54            | 5.058                          | 1159.90            | 5866.99            |
| A_68_P25994476 | chr8:81922795-81922839                            | NM_008539:551            | Smad1         | INSIDE                 | 1.795                                                        | 10.589                         | 3319.82            | 35154.77           | 19.006                         | 2493.42            | 47388.88           |
| A_68_P31675573 | chr18:46358367-46358411                           | NM_001170855:84          | Trim36        | INSIDE                 | 1.795                                                        | 2.018                          | 1190.25            | 2402.41            | 3.623                          | 1052.42            | 3813.30            |
| A_68_P28613117 | chr12:88289051-88289098                           | NM_173735:782            | 2310044G17Rik | INSIDE                 | 1.794                                                        | 4.048                          | 1247.68            | 5050.33            | 7.262                          | 971.94             | 7058.25            |
| A_68_P20633265 | chr1:136312273-136312317                          | NM_028320:251            | Adipor1       | INSIDE                 | 1.794                                                        | 4.207                          | 10396.44           | 43740.06           | 7.547                          | 7847.36            | 59223.02           |
| A_68_P22899538 | chr4:48292337-48292381                            | NM_029572:103            | Erp44         | INSIDE                 | 1.794                                                        | 2.440                          | 5149.30            | 12565.52           | 4.377                          | 3986.47            | 17447.60           |
| A_68_P30478814 | chr15:99054189-99054233                           | NM_010601:-1196          | Kenh3         | PROMOTER               | 1.794                                                        | 4.971                          | 3105.74            | 15437.94           | 8.916                          | 2434.66            | 21707.96           |
| A_68_P28600848 | chr12:86217110-86217154                           | NM_013589:313            | Ltbp2         | INSIDE                 | 1.794                                                        | 1.754                          | 853.83             | 1497.77            | 3.146                          | 705.49             | 2219.75            |
| A_68_P32567492 | chrX:99352458-99352502                            | NM_146235:-50            | Ercc6l        | PROMOTER               | 1.793                                                        | 4.973                          | 810.47             | 4030.48            | 8.915                          | 463.28             | 4129.97            |
| A_68_P22082256 | chr3:40753573-40753617                            | NM_001040399:-958        | Larp1b        | PROMOTER               | 1.793                                                        | 2.331                          | 22714.34           | 52937.90           | 4.178                          | 16691.41           | 69733.62           |
| A_68_P28351016 | chr12:35731926-35731970                           | NM_001014973:88          | Snx13         | INSIDE                 | 1.793                                                        | 5.061                          | 1661.88            | 8411.34            | 9.077                          | 1424.16            | 12927.00           |
| A_68_P22345154 | chr3:95491735-95491779                            | NM_144899:25             | Adamts4       | INSIDE                 | 1.792                                                        | 1.859                          | 2073.84            | 3854.71            | 3.330                          | 1714.80            | 5711.03            |
| A_68_P25498532 | chr7:133225682-133225726                          | NM_001101488:221         | Gsg11         | INSIDE                 | 1.792                                                        | 5.769                          | 15276.74           | 88131.47           | 10.340                         | 11739.08           | 121378.90          |
| A_68_P20778372 | chr1:164478561-164478605                          | NM_144877:-106           | Mettl13       | PROMOTER               | 1.791                                                        | 2.885                          | 7977.41            | 23018.06           | 5.169                          | 5991.19            | 30966.64           |
| A_68_P25948621 | chr8:72427093-72427137                            | NM_023312:-657           | Ndufa13       | PROMOTER               | 1.791                                                        | 1.527                          | 619.53             | 946.15             | 2.735                          | 577.30             | 1579.17            |
| A_68_P29682917 | chr14:67690619-67690663                           | NM_001205188:668         | Ppp2r2a       | INSIDE                 | 1.791                                                        | 7.070                          | 3368.81            | 23816.75           | 12.659                         | 2318.52            | 29350.15           |
| A_68_P32710882 | chrX:139400446-139400490                          | NM_019496:803            | Ammecr1       | INSIDE                 | 1.790                                                        | 3.226                          | 976.55             | 3150.72            | 5.775                          | 511.66             | 2954.91            |
| A_68_P28598112 | chr12:85749605-85749649                           | NM_001026214:353         | Entpd5        | INSIDE                 | 1.790                                                        | 3.507                          | 2023.75            | 7097.12            | 6.279                          | 1689.57            | 10608.28           |
| A_68_P27500779 | chr10:120416497-120416541                         | NM_001081193:-132        | Lemd3         | PROMOTER               | 1.790                                                        | 4.313                          | 931.72             | 4018.41            | 7.721                          | 825.94             | 6376.93            |
| A_68_P22340919 | chr3:94642155-94642199                            | NM_001165948:688         | Pogz          | INSIDE                 | 1.790                                                        | 7.624                          | 1520.61            | 11592.56           | 13.646                         | 1173.41            | 16012.30           |
| A_68_P25092685 | chr7:52622314-52622358                            | NM_029741:53             | Ppfi3         | INSIDE                 | 1.790                                                        | 3.630                          | 1450.59            | 5264.91            | 6.498                          | 1233.06            | 8011.86            |
| A_68_P27277985 | chr10:79100697-79100741                           | NM_001024539:-55         | Shc2          | PROMOTER               | 1.790                                                        | 3.240                          | 1741.42            | 5642.11            | 5.799                          | 1450.86            | 8414.19            |
| A_68_P24008929 | chr5:115751222-115751266                          | NM_019682:-245           | Dynll1        | PROMOTER               | 1.789                                                        | 4.209                          | 2244.59            | 9447.12            | 7.528                          | 1866.35            | 14049.56           |
| A_68_P32386813 | chrX:50622802-50622846                            | NM_001166365:158         | Fam122b       | INSIDE                 | 1.789                                                        | 8.506                          | 5647.04            | 48031.03           | 15.218                         | 2876.24            | 43771.99           |
| A_68_P32457442 | chrX:69520267-69520311                            | NM_017369:-228           | Gabre         | PROMOTER               | 1.789                                                        | 4.370                          | 3001.36            | 13115.06           | 7.817                          | 2007.83            | 15694.92           |
| A_68_P28029575 | chr11:93747831-93747875                           | NM_134012:320            | Mbtid1        | INSIDE                 | 1.789                                                        | 4.285                          | 2190.93            | 9388.97            | 7.668                          | 1775.23            | 13611.80           |
| A_68_P25588870 | chr7:148633634-148633678                          | NR_034049:-1075          | Snora52       | PROMOTER               | 1.789                                                        | 2.259                          | 6061.79            | 13694.99           | 4.041                          | 4450.07            | 17984.60           |
| A_68_P26134826 | chr8:108129362-108129406                          | NR_035492:-9981          | Mir1966       | PROMOTER               | 1.788                                                        | 3.411                          | 2337.21            | 7972.16            | 6.098                          | 1612.29            | 9831.01            |
| A_68_P23991577 | chr5:112772027-112772071                          | NM_027323:12             | Srrd          | INSIDE                 | 1.788                                                        | 3.757                          | 18048.04           | 67814.54           | 6.717                          | 14956.85           | 100468.50          |
| A_68_P25328173 | chr7:100228372-100228416                          | NM_021427:6              | Fam181b       | INSIDE                 | 1.787                                                        | 2.659                          | 1172.86            | 3119.18            | 4.753                          | 871.74             | 4143.13            |
| A_68_P29575892 | chr14:47000105-47000149                           | NR_037981:928            | Gm15217       | INSIDE                 | 1.787                                                        | 3.607                          | 2919.11            | 10529.17           | 6.446                          | 2186.72            | 14096.10           |
| A_68_P28067972 | chr11:100275705-100275749                         | NM_176830:407            | Leprel4       | INSIDE                 | 1.787                                                        | 4.906                          | 930.00             | 4562.88            | 8.768                          | 870.89             | 7635.61            |
| A_68_P27288382 | chr10:80720130-80720174                           | NM_010768:-137           | Matk          | PROMOTER               | 1.787                                                        | 7.778                          | 2735.01            | 21273.82           | 13.898                         | 2288.70            | 31808.01           |
| A_68_P28748036 | chr12:113368595-113368639                         | NR_029590:-474           | Mir203        | PROMOTER               | 1.787                                                        | 2.450                          | 281.02             | 688.43             | 4.378                          | 193.24             | 845.98             |
| A_68_P25948620 | chr8:72427025-72427069                            | NM_023312:-589           | Ndufa13       | PROMOTER               | 1.787                                                        | 3.236                          | 714.39             | 2311.79            | 5.783                          | 683.51             | 3952.85            |
| A_68_P20421182 | chr1:89904977-89905021                            | NM_001033291:128         | Usp40         | INSIDE                 | 1.787                                                        | 3.697                          | 4393.92            | 16244.86           | 6.605                          | 3280.38            | 21667.59           |
| A_68_P31148785 | chr17:33495528-33495572                           | NM_207541:273            | Zfp81         | INSIDE                 | 1.787                                                        | 2.112                          | 3403.81            | 7188.31            | 3.773                          | 2674.22            | 10090.12           |
| A_68_P31561526 | chr18:24868000-24868044                           | NM_175276:77             | Fhod3         | INSIDE                 | 1.786                                                        | 4.266                          | 1651.68            | 7046.32            | 7.617                          | 1352.02            | 10298.76           |
| A_68_P30424721 | chr15:89186360-89186404                           | NM_001115132:230         | Ncaph2        | INSIDE                 | 1.786                                                        | 4.363                          | 3195.59            | 13942.59           | 7.793                          | 2602.19            | 20277.78           |
| A_68_P24872958 | chr6:136467356-136467400                          | NM_019426:7              | Atf7ip        | INSIDE                 | 1.785                                                        | 3.282                          | 2891.36            | 9490.11            | 5.858                          | 2247.19            | 13163.42           |
| A_68_P26825039 | chr9:110558909-110558957                          | NM_028312:-74            | Ccdc12        | DIVERGENT_PROMOTER     | 1.785                                                        | 1.894                          | 1145.22            | 2168.99            | 3.380                          | 928.34             | 3138.11            |

| ProbeName      | Target position of probe on CpG island microarray | TargetID               | GeneSymbol | CpG island Description | Ratio of relative methylation (TiO <sub>2</sub> -NP/Vehicle) | Sham group                     |                    |                    | TiO <sub>2</sub> -H group      |                    |                    |
|----------------|---------------------------------------------------|------------------------|------------|------------------------|--------------------------------------------------------------|--------------------------------|--------------------|--------------------|--------------------------------|--------------------|--------------------|
|                |                                                   |                        |            |                        |                                                              | Relative methylation (Cy5/Cy3) | Cy3 signal (Input) | Cy5 signal (MeDIP) | Relative methylation (Cy5/Cy3) | Cy3 signal (Input) | Cy5 signal (MeDIP) |
| A_68_P22301528 | chr3:86028273-86028317                            | NM_001077687-317       | Lrba       | PROMOTER               | 1.785                                                        | 3.658                          | 708.35             | 2591.21            | 6.529                          | 653.27             | 4265.14            |
| A_68_P24362057 | chr6:35489865-35489909                            | NM_008098:2            | Mtpn       | INSIDE                 | 1.785                                                        | 3.996                          | 2129.43            | 8508.36            | 7.134                          | 1659.27            | 11837.30           |
| A_68_P31098019 | chr17:24687487-24687532                           | NM_013630:615          | Pkd1       | INSIDE                 | 1.785                                                        | 5.306                          | 1287.64            | 6831.75            | 9.469                          | 1086.78            | 10290.64           |
| A_68_P25960292 | chr8:74764393-74764437                            | NM_007456:384          | Ap1m1      | INSIDE                 | 1.784                                                        | 2.981                          | 740.71             | 2207.94            | 5.317                          | 583.61             | 3102.99            |
| A_68_P24397660 | chr6:42274774-42274818                            | NM_001113327-157       | Fam131b    | PROMOTER               | 1.784                                                        | 2.154                          | 2777.70            | 5982.65            | 3.841                          | 2513.41            | 9655.11            |
| A_68_P24154219 | chr5:143723667-143723712                          | NM_007984:1656         | Fscn1      | INSIDE                 | 1.784                                                        | 4.276                          | 1532.87            | 6554.20            | 7.628                          | 1125.17            | 8582.46            |
| A_68_P28744403 | chr12:112723947-112723992                         | NM_001033248:65        | Gm266      | INSIDE                 | 1.784                                                        | 1.381                          | 2131.22            | 2942.41            | 2.463                          | 1768.10            | 4355.31            |
| A_68_P29863087 | chr14:103381523-103381567                         | NM_177715:310          | Ketd12     | INSIDE                 | 1.784                                                        | 8.827                          | 2400.30            | 21187.50           | 15.751                         | 1800.82            | 28365.41           |
| A_68_P21099263 | chr2:29602898-29602942                            | NM_001039086:127681    | Rapgef1    | DOWNSTREAM             | 1.784                                                        | 1.437                          | 1080.70            | 1553.22            | 2.563                          | 938.01             | 2404.52            |
| A_68_P31412120 | chr17:86087935-86087979                           | NM_011380-362          | Six2       | PROMOTER               | 1.784                                                        | 7.698                          | 5465.70            | 42077.02           | 13.734                         | 4681.46            | 64296.65           |
| A_68_P21631241 | chr2:130523070-130523114                          | NM_001081162:163       | Slc4a11    | INSIDE                 | 1.784                                                        | 2.805                          | 856.46             | 2402.29            | 5.003                          | 680.46             | 3404.16            |
| A_68_P26581054 | chr9:641296558-64129702                           | NM_025372:267          | Tipin      | INSIDE                 | 1.784                                                        | 1.772                          | 3811.93            | 6754.17            | 3.161                          | 3116.88            | 9853.57            |
| A_68_P25940715 | chr8:70586499-70586543                            | ENSMUST00000150169-335 |            | PROMOTER               | 1.784                                                        | 5.329                          | 693.49             | 3695.53            | 9.509                          | 526.22             | 5003.90            |
| A_68_P24000798 | chr5:114359230-114359275                          | NM_011779-537          | Coro1c     | PROMOTER               | 1.783                                                        | 5.286                          | 11332.47           | 59901.40           | 9.423                          | 7656.87            | 72153.48           |
| A_68_P25641012 | chr8:9207827-9207871                              | NM_173446:563175       | Fam155a    | INSIDE                 | 1.783                                                        | 2.152                          | 310.81             | 668.92             | 3.836                          | 231.54             | 888.28             |
| A_68_P29094155 | chr13:63664480-63664524                           | NM_008957:2326         | Ptch1      | INSIDE                 | 1.783                                                        | 5.078                          | 1136.97            | 5773.54            | 9.054                          | 940.38             | 8514.46            |
| A_68_P25032744 | chr7:31435111-31435155                            | NM_133693:115          | Rbm42      | INSIDE                 | 1.783                                                        | 4.162                          | 759.76             | 3161.83            | 7.420                          | 589.95             | 4377.41            |
| A_68_P21580976 | chr2:121275325-121275369                          | NM_011354:383          | Serf2      | INSIDE                 | 1.783                                                        | 2.627                          | 1183.49            | 3109.35            | 4.685                          | 1067.15            | 4999.11            |
| A_68_P25091507 | chr7:52417775-52417819                            | NM_182993-1494         | Slc17a7    | PROMOTER               | 1.783                                                        | 4.040                          | 3391.39            | 13699.88           | 7.203                          | 2543.47            | 18320.64           |
| A_68_P24766862 | chr6:114688350-114688394                          | NM_028835-95230        | Atg7       | INSIDE                 | 1.782                                                        | 3.117                          | 2619.62            | 8164.55            | 5.554                          | 2153.76            | 11961.65           |
| A_68_P31929035 | chr19:5490695-5490739                             | NM_007687:262          | Cfl1       | INSIDE                 | 1.782                                                        | 3.659                          | 3764.08            | 13772.99           | 6.520                          | 2853.19            | 18602.65           |
| A_68_P23416903 | chr4:151532635-151532679                          | NM_008236-319          | Hes2       | DIVERGENT_PROMOTER     | 1.782                                                        | 2.676                          | 1085.29            | 2904.61            | 4.769                          | 811.53             | 3870.50            |
| A_68_P22530177 | chr3:130815462-130815506                          | NM_010703-2096         | Lef1       | INSIDE                 | 1.782                                                        | 3.664                          | 2595.49            | 9508.91            | 6.530                          | 2057.48            | 13436.06           |
| A_68_P31774692 | chr18:64500898-64500942                           | NM_194268:903          | Onecut2    | INSIDE                 | 1.782                                                        | 3.177                          | 1989.72            | 6321.43            | 5.662                          | 1432.33            | 8109.73            |
| A_68_P26591323 | chr9:65972506-65972550                            | NM_019727:165          | Snx1       | INSIDE                 | 1.782                                                        | 2.993                          | 1149.29            | 3439.90            | 5.332                          | 971.18             | 5178.63            |
| A_68_P31197210 | chr17:44914016-44914060                           | NM_178652-81           | Supt3h     | PROMOTER               | 1.782                                                        | 4.329                          | 2694.77            | 11664.92           | 7.713                          | 2128.74            | 16418.48           |
| A_68_P27269640 | chr10:77140522-77140570                           |                        |            | Unknown                | 1.782                                                        | 2.558                          | 3658.89            | 9360.00            | 4.557                          | 2742.95            | 12500.90           |
| A_68_P22340674 | chr3:94590393-94590437                            | NM_001037711:23        | Cgn        | INSIDE                 | 1.781                                                        | 2.740                          | 3234.59            | 8862.34            | 4.881                          | 2421.32            | 11818.44           |
| A_68_P23873660 | chr5:89149794-89149838                            | NM_026735-79           | Mobk1a     | PROMOTER               | 1.781                                                        | 1.972                          | 1492.65            | 2944.13            | 3.513                          | 1281.13            | 4500.88            |
| A_68_P27281785 | chr10:79689246-79689290                           | NM_023431-74           | Mum1       | PROMOTER               | 1.780                                                        | 3.402                          | 6975.63            | 23734.06           | 6.057                          | 5170.10            | 31312.73           |
| A_68_P23435277 | chr4:154338248-154338292                          | NM_172990:29           | Pank4      | INSIDE                 | 1.780                                                        | 5.935                          | 6193.36            | 36759.48           | 10.566                         | 4696.39            | 49623.53           |
| A_68_P21250385 | chr2:58999390-58999434                            | NM_026361:506          | Pkp4       | INSIDE                 | 1.780                                                        | 4.497                          | 4161.06            | 18710.84           | 8.005                          | 2857.20            | 22872.33           |
| A_68_P28159934 | chr11:116403055-116403099                         | NM_173755-39685        | Ube2o      | INSIDE                 | 1.780                                                        | 3.415                          | 1066.32            | 3641.22            | 6.080                          | 893.63             | 5433.21            |
| A_68_P30484704 | chr15:100058837-100058881                         | NM_007497:569          | Atf1       | INSIDE                 | 1.779                                                        | 3.069                          | 632.44             | 1941.20            | 5.461                          | 547.45             | 2989.56            |
| A_68_P23203774 | chr4:109655335-109655379                          | NM_172296:4727         | Dmrt2      | INSIDE                 | 1.779                                                        | 4.383                          | 3173.67            | 13908.76           | 7.797                          | 2499.63            | 19489.75           |
| A_68_P22722447 | chr4:9771366-9771410                              | NM_013526-130          | Gdf6       | PROMOTER               | 1.779                                                        | 2.585                          | 23523.29           | 60796.56           | 4.598                          | 16395.60           | 75387.85           |
| A_68_P20372363 | chr1:78654178-78654222                            | NM_001001981-199       | Utp14b     | PROMOTER               | 1.779                                                        | 2.805                          | 1095.37            | 3072.37            | 4.989                          | 992.11             | 4949.18            |
| A_68_P20880195 | chr1:183141802-183141846                          | NM_145514:285          | Wdr26      | INSIDE                 | 1.779                                                        | 4.212                          | 2162.58            | 9109.20            | 7.493                          | 1734.85            | 12999.94           |
| A_68_P31150957 | chr17:34053104-34053148                           | NM_020625:6            | Zbtb22     | INSIDE                 | 1.779                                                        | 4.398                          | 11456.48           | 50390.67           | 7.827                          | 8771.91            | 68655.84           |
| A_68_P25008269 | chr7:25866719-25866763                            | NM_175477:4476         | Zfp574     | INSIDE                 | 1.779                                                        | 4.221                          | 4048.08            | 17085.21           | 7.509                          | 3275.89            | 24598.20           |
| A_68_P26055737 | chr8:93432164-93432208                            | NM_177224:79453        | Chd9       | INSIDE                 | 1.778                                                        | 5.839                          | 1278.96            | 7467.43            | 10.384                         | 1034.28            | 10739.74           |
| A_68_P23365645 | chr4:141279495-141279539                          | NM_001017966-182       | Ddi2       | PROMOTER               | 1.778                                                        | 2.405                          | 1101.33            | 2649.11            | 4.276                          | 961.04             | 4109.56            |
| A_68_P28055686 | chr11:98188438-98188482                           | NM_010895:2499         | Neurod2    | INSIDE                 | 1.778                                                        | 5.624                          | 3157.40            | 17755.68           | 10.001                         | 1993.02            | 19932.24           |
| A_68_P28053984 | chr11:97883326-97883370                           | NM_001159320-3662      | Cacnb1     | PROMOTER               | 1.777                                                        | 3.533                          | 2587.31            | 9140.65            | 6.279                          | 1866.76            | 11721.27           |
| A_68_P28528483 | chr12:72932910-72932958                           | NM_026102:870          | Daam1      | INSIDE                 | 1.777                                                        | 7.692                          | 781.12             | 6008.10            | 13.668                         | 536.03             | 7326.51            |
| A_68_P25672261 | chr8:14096967-14097011                            | NM_001145965:1114      | Dlgap2     | INSIDE                 | 1.777                                                        | 3.076                          | 3873.43            | 11915.11           | 5.468                          | 2879.39            | 15743.16           |
| A_68_P29250236 | chr13:98010968-98011012                           | NM_007930-69           | Enc1       | PROMOTER               | 1.777                                                        | 7.313                          | 1585.24            | 11593.63           | 12.995                         | 1275.24            | 16571.48           |
| A_68_P21367543 | chr2:79095483-79095527                            | NM_010576-78           | Itga4      | PROMOTER               | 1.777                                                        | 3.658                          | 2017.49            | 7379.30            | 6.500                          | 1621.43            | 10538.48           |
| A_68_P22572454 | chr3:138738598-138738642                          | NM_001040690-457       | Rap1gds1   | PROMOTER               | 1.777                                                        | 6.223                          | 1452.24            | 9037.25            | 11.060                         | 1227.37            | 13575.00           |
| A_68_P24541704 | chr6:72389176-72389220                            | NM_145569:354          | Mat2a      | INSIDE                 | 1.776                                                        | 3.581                          | 1968.78            | 7050.07            | 6.361                          | 1773.17            | 11279.90           |
| A_68_P27568398 | chr11:6316069-6316113                             | NM_008907:218          | Ppia       | INSIDE                 | 1.776                                                        | 4.454                          | 3774.27            | 16809.61           | 7.911                          | 3015.41            | 23855.94           |

| ProbeName      | Target position of probe on CpG island microarray | TargetID            | GeneSymbol | CpG island Description | Ratio of relative methylation (TiO <sub>2</sub> -NP/Vehicle) | Sham group                     |                    |                    | TiO <sub>2</sub> -H group      |                    |                    |
|----------------|---------------------------------------------------|---------------------|------------|------------------------|--------------------------------------------------------------|--------------------------------|--------------------|--------------------|--------------------------------|--------------------|--------------------|
|                |                                                   |                     |            |                        |                                                              | Relative methylation (Cy5/Cy3) | Cy3 signal (Input) | Cy5 signal (MeDIP) | Relative methylation (Cy5/Cy3) | Cy3 signal (Input) | Cy5 signal (MeDIP) |
| A_68_P31791990 | chr18:67624448-67624492                           | NM_144867:32        | Simo1      | PROMOTER               | 1.776                                                        | 1.828                          | 573.52             | 1048.66            | 3.248                          | 617.54             | 2005.65            |
| A_68_P20863553 | chr1:180299131-180299175                          |                     |            | Unknown                | 1.776                                                        | 4.221                          | 3754.06            | 15846.01           | 7.498                          | 3098.90            | 23236.86           |
| A_68_P24791280 | chr6:119057361-119057408                          | NM_001159533:825    | Caena1c    | INSIDE                 | 1.775                                                        | 3.638                          | 2783.45            | 10125.32           | 6.457                          | 2185.01            | 14109.12           |
| A_68_P31565714 | chr18:25645254-25645298                           | NM_001146292:267208 | Celf4      | INSIDE                 | 1.775                                                        | 2.149                          | 1952.48            | 4194.93            | 3.813                          | 1584.88            | 6043.79            |
| A_68_P26504861 | chr9:50467491-50467535                            | NM_145614:373       | Dlat       | INSIDE                 | 1.775                                                        | 3.414                          | 2240.05            | 7647.12            | 6.059                          | 1937.02            | 11735.53           |
| A_68_P31333820 | chr17:71660018-71660062                           | NM_145158:265       | Emilin2    | INSIDE                 | 1.775                                                        | 3.943                          | 1298.83            | 5121.79            | 7.000                          | 1128.92            | 7902.88            |
| A_68_P30261330 | chr15:60655945-60655989                           | NM_001162926:669    | Fam84b     | INSIDE                 | 1.775                                                        | 3.498                          | 751.96             | 2630.19            | 6.210                          | 645.31             | 4007.21            |
| A_68_P23609897 | chr5:37221748-37221792                            | NM_008550:118       | Man2b2     | INSIDE                 | 1.775                                                        | 2.479                          | 395.33             | 980.03             | 4.399                          | 374.60             | 1648.01            |
| A_68_P25046332 | chr7:35697322-35697366                            | NM_008820:81        | Peptd      | PROMOTER               | 1.775                                                        | 4.026                          | 3483.89            | 14027.35           | 7.147                          | 2496.64            | 17842.52           |
| A_68_P23308821 | chr4:131429974-131430018                          | NM_020587:443       | Srsf4      | INSIDE                 | 1.775                                                        | 1.555                          | 884.71             | 1375.62            | 2.760                          | 827.18             | 2283.21            |
| A_68_P32707838 | chrX:138825108-138825152                          | NM_001033600:-52    | Acsf4      | PROMOTER               | 1.774                                                        | 2.727                          | 1079.84            | 2945.22            | 4.840                          | 552.09             | 2671.95            |
| A_68_P28154359 | chr11:115465196-115465240                         | NM_173048:2         | Gga3       | INSIDE                 | 1.774                                                        | 3.264                          | 732.95             | 2392.19            | 5.789                          | 639.72             | 3703.54            |
| A_68_P24382000 | chr6:39157044-39157088                            | NM_001033430:-294   | Jhdm1d     | PROMOTER               | 1.774                                                        | 8.461                          | 8493.65            | 71863.49           | 15.006                         | 8119.38            | 121837.70          |
| A_68_P32579463 | chrX:102347552-102347596                          | AK136781:-2464      |            | PROMOTER               | 1.774                                                        | 2.645                          | 1412.04            | 3734.71            | 4.692                          | 791.80             | 3715.44            |
| A_68_P32287125 | chrX:19638017-19638061                            | NM_021715:1343      | Chst7      | INSIDE                 | 1.773                                                        | 2.989                          | 484.37             | 1447.95            | 5.301                          | 264.32             | 1401.23            |
| A_68_P30659187 | chr16:33684576-33684620                           | NM_175256:47        | Heg1       | INSIDE                 | 1.773                                                        | 6.285                          | 2971.27            | 18674.29           | 11.145                         | 2361.20            | 26314.81           |
| A_68_P24383009 | chr6:39369612-39369656                            | NM_018810:734       | Mkrm1      | INSIDE                 | 1.773                                                        | 4.571                          | 1184.49            | 5414.21            | 8.105                          | 871.42             | 7062.48            |
| A_68_P30782600 | chr16:56717318-56717362                           | NM_019678:127       | Tfig       | INSIDE                 | 1.773                                                        | 2.471                          | 835.50             | 2064.67            | 4.382                          | 706.35             | 3094.87            |
| A_68_P22347225 | chr3:95861928-95861972                            | NM_013841:428       | Vps45      | INSIDE                 | 1.773                                                        | 1.463                          | 941.12             | 1376.55            | 2.593                          | 861.27             | 2233.70            |
| A_68_P32351254 | chrX:42143356-42143400                            | NM_178739:-4        | Dcaf12l1   | PROMOTER               | 1.772                                                        | 2.845                          | 4125.07            | 11736.55           | 5.042                          | 2258.89            | 11388.94           |
| A_68_P31928602 | chr19:5424535-5424579                             | NM_024176:360       | Drap1      | INSIDE                 | 1.772                                                        | 3.070                          | 6270.42            | 19247.44           | 5.439                          | 4578.67            | 24902.28           |
| A_68_P32095553 | chr19:37509433-37509477                           | NM_008245:124       | Hhex       | INSIDE                 | 1.772                                                        | 3.525                          | 3556.33            | 12536.69           | 6.247                          | 2918.16            | 18228.33           |
| A_68_P29469015 | chr14:24824174-24824218                           | NM_010610:-769      | Kenma1     | PROMOTER               | 1.772                                                        | 3.849                          | 993.01             | 3822.26            | 6.822                          | 802.86             | 5476.86            |
| A_68_P26344985 | chr9:20807480-20807524                            | NM_023167:322       | Mrp14      | INSIDE                 | 1.772                                                        | 1.812                          | 959.47             | 1738.23            | 3.210                          | 728.81             | 2339.48            |
| A_68_P29453038 | chr14:22320578-22320622                           | NM_017479:1594      | Myst4      | INSIDE                 | 1.772                                                        | 10.363                         | 8250.98            | 85508.03           | 18.364                         | 5000.42            | 91827.39           |
| A_68_P32148144 | chr19:47253081-47253125                           | NM_021360:-207      | Neur11a    | PROMOTER               | 1.772                                                        | 2.016                          | 1665.95            | 3358.83            | 3.572                          | 1310.60            | 4681.33            |
| A_68_P25088125 | chr7:51807692-51807736                            | NM_009473:1579      | Nr1h2      | INSIDE                 | 1.772                                                        | 8.216                          | 7542.10            | 61962.49           | 14.558                         | 5015.40            | 73015.23           |
| A_68_P24061285 | chr5:124889815-124889859                          | NM_030241:-102      | Setd8      | PROMOTER               | 1.772                                                        | 6.736                          | 706.20             | 4756.98            | 11.934                         | 574.76             | 6858.93            |
| A_68_P27165498 | chr10:58275060-58275104                           | NM_172788:-1024     | Sh3rf3     | PROMOTER               | 1.772                                                        | 1.997                          | 6835.60            | 13649.97           | 3.539                          | 5808.04            | 20551.85           |
| A_68_P24951825 | chr7:5008460-5008504                              | NM_146178:155       | Ccdc106    | INSIDE                 | 1.771                                                        | 2.209                          | 1864.31            | 4118.27            | 3.912                          | 1406.04            | 5500.30            |
| A_68_P26375208 | chr9:27107222-27107266                            | NM_001033323:432    | Igfbp3     | INSIDE                 | 1.771                                                        | 11.717                         | 1501.62            | 17594.76           | 20.756                         | 1142.28            | 23708.96           |
| A_68_P32565869 | chrX:99044829-99044873                            | NM_001163610:127    | Nhs12      | INSIDE                 | 1.771                                                        | 4.869                          | 967.20             | 4709.58            | 8.623                          | 694.45             | 5988.30            |
| A_68_P29258499 | chr13:99359027-99359071                           | AK135687:168913     |            | INSIDE                 | 1.771                                                        | 14.231                         | 1753.95            | 24959.88           | 25.208                         | 1094.15            | 27581.51           |
| A_68_P31610600 | chr18:34165600-34165644                           | NM_013512:1238      | Epb4.114a  | INSIDE                 | 1.770                                                        | 4.669                          | 7245.25            | 33830.49           | 8.266                          | 5145.26            | 42531.44           |
| A_68_P31873837 | chr18:82113134-82113178                           | AK046168:311        |            | INSIDE                 | 1.770                                                        | 1.694                          | 1350.04            | 2286.41            | 2.998                          | 1131.40            | 3392.14            |
| A_68_P23770428 | chr5:68238336-68238380                            | NM_001038999:312    | Atp8a1     | INSIDE                 | 1.769                                                        | 2.920                          | 5059.10            | 14771.55           | 5.165                          | 4019.53            | 20760.05           |
| A_68_P28047199 | chr11:96723478-96723522                           | NM_019877:12311     | Copz2      | DOWNSTREAM             | 1.769                                                        | 2.368                          | 1123.29            | 2659.94            | 4.189                          | 762.30             | 3193.24            |
| A_68_P32128434 | chr19:43827858-43827902                           | NM_001113562:368    | Cutc       | INSIDE                 | 1.769                                                        | 2.558                          | 2374.32            | 6072.97            | 4.525                          | 1895.91            | 8578.58            |
| A_68_P31161104 | chr17:35960060-35960104                           | NM_008027:-219      | Flot1      | PROMOTER               | 1.769                                                        | 5.447                          | 1552.32            | 8455.38            | 9.634                          | 1231.80            | 11866.98           |
| A_68_P27921007 | chr11:74336152-74336196                           | NM_001015046:67486  | Rap1gap2   | INSIDE                 | 1.769                                                        | 3.183                          | 828.38             | 2636.47            | 5.632                          | 709.37             | 3994.99            |
| A_68_P27804722 | chr11:53244281-53244325                           | NM_025352:31        | Uqerq      | INSIDE                 | 1.769                                                        | 1.652                          | 602.65             | 995.78             | 2.923                          | 574.97             | 1680.60            |
| A_68_P30149946 | chr15:38448361-38448405                           | NM_001102458:639    | Azin1      | INSIDE                 | 1.768                                                        | 2.411                          | 2801.07            | 6754.27            | 4.263                          | 2330.83            | 9935.58            |
| A_68_P25015934 | chr7:27963629-27963673                            | NR_037283:-2540     | Mir3101    | PROMOTER               | 1.768                                                        | 3.211                          | 11134.92           | 35755.86           | 5.678                          | 7580.22            | 43038.60           |
| A_68_P30382971 | chr15:82184657-82184701                           | NM_025987:43        | Ndufa6     | INSIDE                 | 1.768                                                        | 7.264                          | 5277.33            | 38335.13           | 12.840                         | 3633.10            | 46648.45           |
| A_68_P31117838 | chr17:27822326-27822370                           | NM_178365:150       | Pacsin1    | INSIDE                 | 1.768                                                        | 3.552                          | 4612.42            | 16382.12           | 6.279                          | 3523.84            | 22124.95           |
| A_68_P27311153 | chr10:85391455-85391499                           | NM_001163614:241    | Acsf4      | INSIDE                 | 1.767                                                        | 4.192                          | 1634.87            | 6853.41            | 7.406                          | 1314.91            | 9737.78            |
| A_68_P28727037 | chr12:109513497-109513541                         | NM_001159910:109    | Ccdc85c    | INSIDE                 | 1.767                                                        | 4.478                          | 592.81             | 2654.85            | 7.911                          | 592.78             | 4689.72            |
| A_68_P22728457 | chr4:11118468-11118512                            | NM_001037134:-10    | Cene2      | PROMOTER               | 1.767                                                        | 2.141                          | 909.54             | 1947.35            | 3.783                          | 756.22             | 2860.48            |
| A_68_P23269776 | chr4:124378137-124378181                          | NM_010213:216       | Fhl3       | INSIDE                 | 1.767                                                        | 3.462                          | 657.54             | 2276.40            | 6.116                          | 625.75             | 3826.93            |
| A_68_P26018642 | chr8:86707908-86707952                            | NR_029821:-5070     | Mir181c    | PROMOTER               | 1.767                                                        | 5.718                          | 2600.84            | 14870.92           | 10.102                         | 2267.63            | 22907.50           |
| A_68_P30368655 | chr15:79634703-79634747                           | NM_030689:415       | Nptxr      | INSIDE                 | 1.767                                                        | 8.180                          | 2599.79            | 21265.87           | 14.457                         | 2031.04            | 29361.75           |



| ProbeName      | Target position of probe on CpG island microarray | TargetID                  | GeneSymbol    | CpG island Description | Ratio of relative methylation (TiO <sub>2</sub> -NP/Vehicle) | Sham group                     |                    |                    | TiO <sub>2</sub> -H group      |                    |                    |
|----------------|---------------------------------------------------|---------------------------|---------------|------------------------|--------------------------------------------------------------|--------------------------------|--------------------|--------------------|--------------------------------|--------------------|--------------------|
|                |                                                   |                           |               |                        |                                                              | Relative methylation (Cy5/Cy3) | Cy3 signal (Input) | Cy5 signal (MeDIP) | Relative methylation (Cy5/Cy3) | Cy3 signal (Input) | Cy5 signal (MeDIP) |
| A_68_P30436282 | chr15:91402943-91402987                           | NM_001033633:728          | Slc2a13       | INSIDE                 | 1.767                                                        | 3.345                          | 1912.48            | 6397.63            | 5.912                          | 1714.23            | 10134.76           |
| A_68_P32393600 | chrX:52896641-52896685                            | ENSMUST00000163353:91930  |               | INSIDE                 | 1.767                                                        | 3.118                          | 1362.56            | 4247.89            | 5.508                          | 790.77             | 4355.57            |
| A_68_P23262662 | chr4:123089650-123089695                          | NM_001167918:-518         | D830031N03Rik | PROMOTER               | 1.766                                                        | 3.937                          | 2775.83            | 10928.71           | 6.954                          | 2219.30            | 15433.61           |
| A_68_P24138256 | chr5:140384605-140384649                          | NM_175522:730             | Elfn1         | INSIDE                 | 1.766                                                        | 9.868                          | 2008.19            | 19816.30           | 17.424                         | 1874.43            | 32660.71           |
| A_68_P21814796 | chr2:163684382-163684426                          | NM_001030292:4919         | Kenk15        | INSIDE                 | 1.766                                                        | 2.761                          | 1864.02            | 5147.25            | 4.876                          | 1411.23            | 6881.10            |
| A_68_P25230185 | chr7:80763469-80763513                            | AK158912:-221             |               | PROMOTER               | 1.766                                                        | 7.062                          | 5298.66            | 37420.68           | 12.469                         | 4235.27            | 52810.32           |
| A_68_P27288028 | chr10:80657209-80657253                           | NR_015477:-205            | 2310050B05Rik | PROMOTER               | 1.765                                                        | 2.499                          | 2529.81            | 6320.77            | 4.411                          | 2017.03            | 8896.69            |
| A_68_P26505081 | chr9:50506728-50506772                            | NM_178118:29339           | Dixdc1        | INSIDE                 | 1.765                                                        | 1.817                          | 1669.25            | 3032.53            | 3.207                          | 1162.67            | 3728.34            |
| A_68_P23590169 | chr5:33972359-33972403                            | NM_178390:-96             | Fam53a        | PROMOTER               | 1.765                                                        | 2.637                          | 5515.12            | 14543.40           | 4.654                          | 4415.98            | 20551.40           |
| A_68_P32805174 | chrX:162677268-162677312                          | NM_001177961:416          | Gpm6b         | INSIDE                 | 1.765                                                        | 1.759                          | 1334.09            | 2347.25            | 3.106                          | 749.12             | 2326.47            |
| A_68_P27910209 | chr11:72028885-72028929                           | NM_026068:188             | Med31         | INSIDE                 | 1.765                                                        | 1.777                          | 736.61             | 1308.89            | 3.136                          | 608.92             | 1909.51            |
| A_68_P24164494 | chr5:145900797-145900843                          | NM_001033313:138          | Pdap1         | INSIDE                 | 1.765                                                        | 2.842                          | 4990.32            | 14183.28           | 5.016                          | 3663.46            | 18375.68           |
| A_68_P32054980 | chr19:29887444-29887488                           | NM_177721:-2              | Ranbp6        | PROMOTER               | 1.765                                                        | 2.134                          | 1348.08            | 2877.14            | 3.766                          | 1137.32            | 4283.48            |
| A_68_P23597150 | chr5:35292277-35292321                            | NM_173402:202             | Rgs12         | INSIDE                 | 1.765                                                        | 6.421                          | 322.42             | 2070.34            | 11.335                         | 287.78             | 3261.91            |
| A_68_P32168791 | chr19:50753028-50753072                           | NM_021377:52              | Sores1        | INSIDE                 | 1.765                                                        | 5.090                          | 1771.47            | 9017.51            | 8.987                          | 1696.90            | 15249.77           |
| A_68_P27542559 | chr10:128105989-128106033                         | NM_173733:4964            | Suox          | DOWNSTREAM             | 1.765                                                        | 4.909                          | 11211.50           | 55040.77           | 8.663                          | 7886.81            | 68326.57           |
| A_68_P26804666 | chr9:106588275-106588319                          | NM_001081654:-17          | Tex264        | PROMOTER               | 1.765                                                        | 2.185                          | 1727.76            | 3774.92            | 3.855                          | 1342.99            | 5177.58            |
| A_68_P21911521 | chr2:181327466-181327510                          | NM_001164597:-322         | Znf512b       | PROMOTER               | 1.765                                                        | 3.573                          | 1536.04            | 5488.81            | 6.305                          | 1321.95            | 8335.16            |
| A_68_P29940452 | chr14:119105540-119105584                         | NM_001033336:-121         | Abcc4         | PROMOTER               | 1.764                                                        | 1.368                          | 1461.86            | 1999.96            | 2.413                          | 1301.71            | 3141.45            |
| A_68_P24372708 | chr6:37392303-37392347                            | NM_178661:-176            | Creb3l2       | PROMOTER               | 1.764                                                        | 2.324                          | 991.77             | 2304.44            | 4.098                          | 853.65             | 3498.34            |
| A_68_P21438069 | chr2:93797146-93797190                            | NM_001145034:89           | Gm13889       | INSIDE                 | 1.764                                                        | 3.176                          | 1991.48            | 6325.51            | 5.604                          | 1596.99            | 8949.92            |
| A_68_P22133096 | chr3:51811618-51811662                            | NM_001004176:97288        | Mam13         | INSIDE                 | 1.764                                                        | 4.761                          | 566.37             | 2696.29            | 8.396                          | 443.15             | 3720.85            |
| A_68_P31612548 | chr18:34533141-34533185                           | NM_007874:-93             | Reep5         | PROMOTER               | 1.764                                                        | 4.572                          | 1898.17            | 8677.73            | 8.066                          | 1528.25            | 12326.48           |
| A_68_P20149049 | chr1:36614326-36614370                            | NM_001126047:878          | Sema4c        | INSIDE                 | 1.764                                                        | 7.297                          | 6518.75            | 47565.21           | 12.870                         | 4549.54            | 58550.61           |
| A_68_P29055901 | chr13:55672343-55672387                           | NM_001162881:-1028        | Fam193b       | PROMOTER               | 1.763                                                        | 2.951                          | 2122.69            | 6264.39            | 5.202                          | 1772.94            | 9223.40            |
| A_68_P30955189 | chr16:90144198-90144242                           | NR_033476:1739            | Gm10789       | INSIDE                 | 1.763                                                        | 6.303                          | 1076.13            | 6783.06            | 11.115                         | 799.09             | 8881.84            |
| A_68_P23978770 | chr5:110715093-110715137                          | NM_008993:73              | Pxmp2         | INSIDE                 | 1.763                                                        | 2.563                          | 2154.39            | 5520.74            | 4.518                          | 1822.63            | 8234.37            |
| A_68_P21151631 | chr2:38860577-38860621                            | NM_025592:53              | Rpl35         | INSIDE                 | 1.763                                                        | 2.925                          | 2620.19            | 7663.81            | 5.157                          | 2061.53            | 10630.55           |
| A_68_P30779064 | chr16:56075886-56075930                           | NM_001003972:387          | Senp7         | INSIDE                 | 1.763                                                        | 6.223                          | 2092.73            | 13022.48           | 10.970                         | 1717.71            | 18843.10           |
| A_68_P31118768 | chr17:27977231-27977275                           | NM_011432:221             | Snrpc         | INSIDE                 | 1.763                                                        | 5.799                          | 496.83             | 2881.28            | 10.226                         | 367.40             | 3757.01            |
| A_68_P26242940 | chr8:126544834-126544878                          | NM_133966:353             | Taf5l         | INSIDE                 | 1.763                                                        | 4.722                          | 1079.06            | 5094.78            | 8.322                          | 864.28             | 7192.74            |
| A_68_P24006959 | chr5:115392406-115392450                          | NM_028211:218             | 2210016L21Rik | INSIDE                 | 1.762                                                        | 2.075                          | 3762.48            | 7807.39            | 3.655                          | 2626.23            | 9600.08            |
| A_68_P21483989 | chr2:103406800-103406844                          | NM_178890:356             | Abtb2         | INSIDE                 | 1.762                                                        | 2.160                          | 513.43             | 1109.03            | 3.805                          | 462.30             | 1759.28            |
| A_68_P26220483 | chr8:123012034-123012078                          | NM_198671:-709            | Gse1          | PROMOTER               | 1.762                                                        | 4.405                          | 1205.27            | 5309.66            | 7.762                          | 902.80             | 7007.95            |
| A_68_P28043336 | chr11:96132754-96132798                           | NM_008270:133             | Hoxb9         | INSIDE                 | 1.762                                                        | 2.702                          | 1478.87            | 3996.34            | 4.761                          | 1167.08            | 5556.00            |
| A_68_P27180703 | chr10:60938705-60938749                           | NM_153542:146             | Lrre20        | INSIDE                 | 1.762                                                        | 16.348                         | 1322.90            | 21626.74           | 28.805                         | 1006.90            | 29004.18           |
| A_68_P25435757 | chr7:121559995-121560039                          | NM_011055:1249            | Pdc3b         | INSIDE                 | 1.762                                                        | 3.398                          | 1535.25            | 5217.14            | 5.987                          | 1224.88            | 7333.25            |
| A_68_P20157818 | chr1:38186099-38186143                            | NM_019570:387             | Rev1          | INSIDE                 | 1.762                                                        | 4.318                          | 390.96             | 1688.19            | 7.608                          | 378.46             | 2879.32            |
| A_68_P26983377 | chr10:19570989-19571033                           | NM_029529:255             | Slc35d3       | INSIDE                 | 1.762                                                        | 1.437                          | 1770.66            | 2545.16            | 2.533                          | 1354.11            | 3430.35            |
| A_68_P31347831 | chr17:74059828-74059872                           | NM_027864:-59             | Galnt14       | PROMOTER               | 1.761                                                        | 2.701                          | 2475.44            | 6685.55            | 4.756                          | 1800.05            | 8561.73            |
| A_68_P31205409 | chr17:46297933-46297977                           | NM_001145979:-24          | Gtppb2        | DIVERGENT_PROMOTER     | 1.761                                                        | 4.260                          | 3135.28            | 13356.36           | 7.504                          | 2415.30            | 18123.83           |
| A_68_P28166383 | chr11:117515888-117515933                         | NM_198022:308             | Tnrc6c        | INSIDE                 | 1.761                                                        | 3.753                          | 1659.74            | 6229.66            | 6.610                          | 1320.71            | 8729.71            |
| A_68_P20622147 | chr1:134439405-134439449                          | NM_177129:91              | Cntn2         | INSIDE                 | 1.760                                                        | 7.013                          | 3736.09            | 26202.98           | 12.345                         | 2879.07            | 35542.74           |
| A_68_P22391858 | chr3:104315425-104315469                          | NM_001025067:333          | Lrig2         | INSIDE                 | 1.760                                                        | 5.016                          | 599.41             | 3006.70            | 8.827                          | 522.51             | 4612.18            |
| A_68_P27892954 | chr11:68901870-68901914                           | NM_009497:-137            | Vamp2         | PROMOTER               | 1.760                                                        | 1.492                          | 1659.78            | 2477.16            | 2.626                          | 1196.24            | 3141.60            |
| A_68_P27083322 | chr10:40020722-40020766                           | NM_007444:1248            | Amd2          | INSIDE                 | 1.759                                                        | 1.725                          | 617.62             | 1065.22            | 3.034                          | 556.90             | 1689.59            |
| A_68_P21094080 | chr2:28763906-28763951                            | NM_019446:8013            | Barhl1        | INSIDE                 | 1.759                                                        | 1.881                          | 359.60             | 676.37             | 3.309                          | 188.20             | 622.75             |
| A_68_P26159425 | chr8:112392612-112392656                          | NM_001122594:132          | Phlpp2        | INSIDE                 | 1.759                                                        | 3.602                          | 1589.73            | 5726.16            | 6.337                          | 1426.80            | 9041.23            |
| A_68_P27327917 | chr10:88348711-88348755                           | NM_145423:-4              | Slc5a8        | PROMOTER               | 1.759                                                        | 5.743                          | 1545.80            | 8878.18            | 10.104                         | 1367.68            | 13818.54           |
| A_68_P26218688 | chr8:122754127-122754171                          | ENSMUST00000127664:319408 |               | INSIDE                 | 1.759                                                        | 4.700                          | 1631.72            | 7669.08            | 8.267                          | 1341.60            | 11090.44           |
| A_68_P21958958 | chr3:14886343-14886387                            | NM_009801:-61             | Car2          | PROMOTER               | 1.758                                                        | 1.790                          | 329.27             | 589.39             | 3.146                          | 299.56             | 942.43             |

| ProbeName      | Target position of probe on CpG island microarray | TargetID           | GeneSymbol    | CpG island Description | Ratio of relative methylation (TiO <sub>2</sub> -NP/Vehicle) | Sham group                                             |                               |                               | TiO <sub>2</sub> -H group                              |                               |                               |
|----------------|---------------------------------------------------|--------------------|---------------|------------------------|--------------------------------------------------------------|--------------------------------------------------------|-------------------------------|-------------------------------|--------------------------------------------------------|-------------------------------|-------------------------------|
|                |                                                   |                    |               |                        |                                                              | Relative methylation (C <sub>5</sub> /C <sub>3</sub> ) | C <sub>3</sub> signal (Input) | C <sub>5</sub> signal (MeDIP) | Relative methylation (C <sub>5</sub> /C <sub>3</sub> ) | C <sub>3</sub> signal (Input) | C <sub>5</sub> signal (MeDIP) |
| A_68_P26526109 | chr9:54349056-54349100                            | NM_172771:355      | Dmxi2         | INSIDE                 | 1.758                                                        | 3.148                                                  | 2854.95                       | 8988.13                       | 5.534                                                  | 2120.01                       | 11732.20                      |
| A_68_P26905236 | chr10:4522611-4522655                             | NM_175374:35       | Mtrf11        | INSIDE                 | 1.758                                                        | 3.434                                                  | 1637.50                       | 5622.63                       | 6.037                                                  | 1288.35                       | 7777.73                       |
| A_68_P30346633 | chr15:76014154-76014198                           | NM_201394:11964    | Plec          | INSIDE                 | 1.758                                                        | 3.607                                                  | 1900.53                       | 6855.42                       | 6.341                                                  | 1385.38                       | 8784.31                       |
| A_68_P31488614 | chr18:10181658-10181702                           | NM_009071:110      | Rock1         | INSIDE                 | 1.758                                                        | 5.975                                                  | 3034.69                       | 18133.36                      | 10.504                                                 | 2295.97                       | 24116.75                      |
| A_68_P22923084 | chr4:53453754-53453798                            | NM_001159633:492   | Slc44a1       | INSIDE                 | 1.758                                                        | 4.226                                                  | 3284.90                       | 13883.52                      | 7.429                                                  | 2686.04                       | 19955.22                      |
| A_68_P23607369 | chr5:36740782-36740826                            | NM_030889:-16      | Sorcs2        | PROMOTER               | 1.758                                                        | 6.372                                                  | 4995.22                       | 31827.52                      | 11.198                                                 | 4038.19                       | 45221.17                      |
| A_68_P20946920 | chr1:194861857-194861901                          | NM_181546:14       | Syt14         | INSIDE                 | 1.758                                                        | 3.505                                                  | 904.97                        | 3171.63                       | 6.162                                                  | 732.36                        | 4513.01                       |
| A_68_P29509885 | chr14:31944046-31944090                           | NR_024069:-1952    | 2010107H07Rik | DIVERGENT_PROMOTER     | 1.757                                                        | 3.885                                                  | 1220.48                       | 4741.76                       | 6.827                                                  | 944.05                        | 6444.63                       |
| A_68_P27351976 | chr10:92623453-92623497                           | NM_146239:-146     | Cdk17         | PROMOTER               | 1.757                                                        | 4.366                                                  | 815.31                        | 3559.77                       | 7.669                                                  | 642.05                        | 4924.18                       |
| A_68_P24859169 | chr6:133985084-133985128                          | NM_007961:-618     | Etv6          | PROMOTER               | 1.757                                                        | 1.842                                                  | 1887.56                       | 3476.45                       | 3.235                                                  | 1459.11                       | 4720.73                       |
| A_68_P23681262 | chr5:50450445-50450489                            | NM_133911:-231     | Gpr125        | PROMOTER               | 1.757                                                        | 7.745                                                  | 1505.05                       | 11656.69                      | 13.611                                                 | 1198.64                       | 16314.77                      |
| A_68_P21078497 | chr2:26264502-26264546                            | NM_033134:184      | Inpp5e        | INSIDE                 | 1.757                                                        | 1.686                                                  | 929.83                        | 1567.59                       | 2.963                                                  | 841.93                        | 2494.54                       |
| A_68_P26270749 | chr8:131209761-131209805                          | NM_010578:229      | Itgb1         | INSIDE                 | 1.757                                                        | 2.130                                                  | 3422.29                       | 7289.03                       | 3.743                                                  | 2642.46                       | 9891.32                       |
| A_68_P25713191 | chr8:23969515-23969559                            | NM_001081149:-474  | Myst3         | PROMOTER               | 1.757                                                        | 1.557                                                  | 599.52                        | 933.45                        | 2.735                                                  | 404.86                        | 1107.42                       |
| A_68_P28029989 | chr11:93817362-93817406                           | NM_008705:-63      | Nme2          | PROMOTER               | 1.757                                                        | 4.151                                                  | 3025.34                       | 12559.02                      | 7.295                                                  | 2391.06                       | 17443.98                      |
| A_68_P31196995 | chr17:44873188-44873232                           | NM_001145920:387   | Rumx2         | INSIDE                 | 1.757                                                        | 2.269                                                  | 882.30                        | 2001.78                       | 3.986                                                  | 705.48                        | 2812.18                       |
| A_68_P27278356 | chr10:79167062-79167106                           | NM_001077184:-18   | Bsg           | PROMOTER               | 1.756                                                        | 1.921                                                  | 932.44                        | 1791.45                       | 3.373                                                  | 697.13                        | 2351.69                       |
| A_68_P26132023 | chr8:107694748-107694792                          | NM_001161456:197   | Ctlf1         | INSIDE                 | 1.756                                                        | 4.825                                                  | 1548.46                       | 7471.14                       | 8.475                                                  | 1377.88                       | 11677.23                      |
| A_68_P30895867 | chr16:78376777-78376821                           | NR_002700:204      | Gm7334        | INSIDE                 | 1.756                                                        | 5.544                                                  | 4323.13                       | 23966.56                      | 9.736                                                  | 3610.15                       | 35150.07                      |
| A_68_P29530592 | chr14:35362336-35362380                           | NM_001039074:39435 | Ldb3          | INSIDE                 | 1.756                                                        | 1.541                                                  | 946.64                        | 1459.23                       | 2.707                                                  | 874.65                        | 2367.60                       |
| A_68_P24894485 | chr6:140373203-140373247                          | NM_144920:605      | Plekha5       | INSIDE                 | 1.756                                                        | 1.787                                                  | 4206.33                       | 7516.88                       | 3.138                                                  | 3331.26                       | 10452.47                      |
| A_68_P31934467 | chr19:6399578-6399622                             | NM_011242:-982     | Rasgrp2       | PROMOTER               | 1.756                                                        | 4.373                                                  | 2869.09                       | 12545.09                      | 7.679                                                  | 2161.16                       | 16595.64                      |
| A_68_P27507134 | chr10:121533967-121534011                         | NM_153059:170      | Tmem5         | INSIDE                 | 1.756                                                        | 2.901                                                  | 22532.79                      | 65360.53                      | 5.093                                                  | 17904.44                      | 91188.08                      |
| A_68_P21782542 | chr2:158187327-158187371                          | NR_027887:-90      | 9430008C03Rik | PROMOTER               | 1.755                                                        | 4.200                                                  | 1215.00                       | 5103.27                       | 7.372                                                  | 959.59                        | 7073.91                       |
| A_68_P31162860 | chr17:36305369-36305413                           | NM_001081032:92    | Gm8909        | INSIDE                 | 1.755                                                        | 2.647                                                  | 5455.52                       | 14440.49                      | 4.646                                                  | 4867.99                       | 22619.08                      |
| A_68_P30497013 | chr15:102110024-102110068                         | NM_134100:160      | Mfsd5         | INSIDE                 | 1.755                                                        | 10.569                                                 | 1150.96                       | 12164.70                      | 18.546                                                 | 955.38                        | 17718.13                      |
| A_68_P26492138 | chr9:48303203-48303247                            | NM_144948:211      | Rbm7          | INSIDE                 | 1.755                                                        | 2.232                                                  | 1857.66                       | 4146.27                       | 3.916                                                  | 1461.89                       | 5724.85                       |
| A_68_P29605237 | chr14:52817103-52817147                           | NM_033618:-210     | Supt16h       | PROMOTER               | 1.755                                                        | 1.527                                                  | 2216.53                       | 3384.63                       | 2.681                                                  | 1820.08                       | 4878.78                       |
| A_68_P25983698 | chr8:80041949-80041993                            | NM_030113:-164     | Arhgap10      | PROMOTER               | 1.754                                                        | 7.007                                                  | 3126.51                       | 21906.85                      | 12.292                                                 | 2424.09                       | 29797.49                      |
| A_68_P29005205 | chr13:46060754-46060798                           | NM_009124:-431     | Atxn1         | PROMOTER               | 1.754                                                        | 3.197                                                  | 1185.29                       | 3789.79                       | 5.607                                                  | 956.20                        | 5361.12                       |
| A_68_P27385039 | chr10:98569849-98569893                           | NM_015737:-898     | Galnt4        | PROMOTER               | 1.754                                                        | 2.881                                                  | 597.56                        | 1721.78                       | 5.053                                                  | 546.34                        | 2760.79                       |
| A_68_P20457526 | chr1:95700053-95700097                            | NM_025454:-467     | Ing5          | DIVERGENT_PROMOTER     | 1.754                                                        | 3.519                                                  | 1095.13                       | 3853.92                       | 6.171                                                  | 890.34                        | 5494.47                       |
| A_68_P25736226 | chr8:28152855-28152901                            | NM_001039077:-148  | Prosc         | PROMOTER               | 1.754                                                        | 3.824                                                  | 3213.83                       | 12289.94                      | 6.708                                                  | 2627.55                       | 17626.44                      |
| A_68_P26875613 | chr9:119920587-119920631                          | NM_011724:12108    | Xirp1         | DOWNSTREAM             | 1.754                                                        | 2.196                                                  | 2506.01                       | 5503.35                       | 3.852                                                  | 2088.07                       | 8042.98                       |
| A_68_P31758329 | chr18:61715242-61715286                           | NM_146087:29       | Csnk1a1       | INSIDE                 | 1.753                                                        | 2.001                                                  | 1909.97                       | 3822.75                       | 3.509                                                  | 1370.39                       | 4808.15                       |
| A_68_P30287852 | chr15:65618774-65618818                           | NM_133766:194      | Efr3a         | INSIDE                 | 1.753                                                        | 1.928                                                  | 260.85                        | 502.80                        | 3.380                                                  | 253.86                        | 858.03                        |
| A_68_P23681257 | chr5:50449672-50449716                            | NM_133911:541      | Gpr125        | INSIDE                 | 1.753                                                        | 3.106                                                  | 6380.11                       | 19814.98                      | 5.445                                                  | 5137.68                       | 27974.89                      |
| A_68_P24449528 | chr6:52210288-52210332                            | NM_008264:564      | Hoxa13        | INSIDE                 | 1.753                                                        | 7.221                                                  | 591.44                        | 4270.79                       | 12.660                                                 | 478.78                        | 6061.55                       |
| A_68_P26951412 | chr10:13194053-13194097                           | NM_001195065:128   | Phactr2       | INSIDE                 | 1.753                                                        | 1.737                                                  | 792.22                        | 1376.34                       | 3.045                                                  | 676.01                        | 2058.35                       |
| A_68_P24001851 | chr5:114541342-114541386                          | NM_026805:25       | Svop          | INSIDE                 | 1.753                                                        | 5.740                                                  | 2988.43                       | 17153.90                      | 10.061                                                 | 2550.77                       | 25662.82                      |
| A_68_P26421598 | chr9:35075374-35075418                            | NM_175411:-31      | Fam118b       | DIVERGENT_PROMOTER     | 1.752                                                        | 1.543                                                  | 895.51                        | 1381.34                       | 2.703                                                  | 863.11                        | 2333.18                       |
| A_68_P26132587 | chr8:107788500-107788544                          | NM_015821:-25      | Fbxl8         | DIVERGENT_PROMOTER     | 1.752                                                        | 3.803                                                  | 715.63                        | 2721.64                       | 6.664                                                  | 631.31                        | 4207.03                       |
| A_68_P26643861 | chr9:75257109-75257153                            | NM_027418:36       | Mapk6         | INSIDE                 | 1.752                                                        | 6.242                                                  | 804.80                        | 5023.46                       | 10.938                                                 | 682.80                        | 7468.18                       |
| A_68_P29051301 | chr13:54867120-54867164                           | NM_033610:659      | Sncb          | INSIDE                 | 1.752                                                        | 3.620                                                  | 2927.26                       | 10596.65                      | 6.343                                                  | 2313.86                       | 14677.38                      |
| A_68_P20022045 | chr1:9289343-9289387                              | NM_027671:447      | Sntg1         | INSIDE                 | 1.752                                                        | 5.857                                                  | 3617.91                       | 21188.75                      | 10.260                                                 | 2628.46                       | 26966.77                      |
| A_68_P28118792 | chr11:109334732-109334776                         | NM_028710:67       | Arsg          | INSIDE                 | 1.751                                                        | 1.983                                                  | 2131.27                       | 4227.17                       | 3.474                                                  | 1811.40                       | 6292.14                       |
| A_68_P22859197 | chr4:40800680-40800724                            | NM_022305:329      | B4galt1       | INSIDE                 | 1.751                                                        | 3.145                                                  | 1556.87                       | 4896.93                       | 5.509                                                  | 1299.73                       | 7159.97                       |
| A_68_P25952284 | chr8:73027155-73027199                            | NM_018827:10122    | Crf1          | INSIDE                 | 1.751                                                        | 3.433                                                  | 2378.66                       | 8165.82                       | 6.011                                                  | 1884.88                       | 11330.54                      |
| A_68_P25089584 | chr7:52095285-52095329                            | NM_010215:3649     | Ii4i1         | INSIDE                 | 1.751                                                        | 2.596                                                  | 1830.05                       | 4751.35                       | 4.547                                                  | 1424.35                       | 6476.19                       |
| A_68_P30453398 | chr15:94459261-94459305                           | NM_178789:-333     | Tmem117       | PROMOTER               | 1.751                                                        | 4.555                                                  | 9344.40                       | 42566.47                      | 7.978                                                  | 6963.78                       | 55556.36                      |
| A_68_P20262088 | chr1:59177273-59177317                            | NM_001033449:-354  | Als2cr4       | PROMOTER               | 1.750                                                        | 4.488                                                  | 745.12                        | 3344.05                       | 7.854                                                  | 631.06                        | 4956.38                       |

| ProbeName      | Target position of probe on CpG island microarray | TargetID               | GeneSymbol    | CpG island Description | Ratio of relative methylation (TiO <sub>2</sub> -NP/Vehicle) | Sham group                     |                    |                    | TiO <sub>2</sub> -H group      |                    |                    |
|----------------|---------------------------------------------------|------------------------|---------------|------------------------|--------------------------------------------------------------|--------------------------------|--------------------|--------------------|--------------------------------|--------------------|--------------------|
|                |                                                   |                        |               |                        |                                                              | Relative methylation (Cy5/Cy3) | Cy3 signal (Input) | Cy5 signal (MeDIP) | Relative methylation (Cy5/Cy3) | Cy3 signal (Input) | Cy5 signal (MeDIP) |
| A_68_P29413810 | chr14:13654360-13654404                           | NM_001042617:1211      | Cadps         | INSIDE                 | 1.750                                                        | 3.642                          | 2671.56            | 9730.57            | 6.374                          | 2240.68            | 14281.93           |
| A_68_P23892215 | chr5:92512150-92512194                            | NM_001080797:-229      | G3bp2         | PROMOTER               | 1.750                                                        | 2.949                          | 1937.02            | 5713.11            | 5.163                          | 1664.45            | 8593.41            |
| A_68_P30961697 | chr16:91226847-91226891                           | NM_016967:1074         | Olig2         | INSIDE                 | 1.750                                                        | 3.045                          | 5236.27            | 15942.01           | 5.329                          | 4041.84            | 21540.29           |
| A_68_P23402215 | chr4:149111795-149111839                          | NM_001025106:327       | Tmem201       | INSIDE                 | 1.750                                                        | 6.996                          | 1464.17            | 10243.76           | 12.245                         | 1030.76            | 12621.58           |
| A_68_P30096385 | chr15:27954397-27954441                           | NM_001081302:1185      | Trio          | INSIDE                 | 1.750                                                        | 1.463                          | 4319.80            | 6321.36            | 2.561                          | 3326.99            | 8521.62            |
| A_68_P32795839 | chrX:160396590-160396634                          | NM_009453:-14          | Zrsr2         | PROMOTER               | 1.750                                                        | 2.246                          | 2229.98            | 5007.44            | 3.929                          | 1201.96            | 4722.33            |
| A_68_P21722826 | chr2:147020543-147020587                          | NM_001077632:-8426     | Nkx2-2        | PROMOTER               | 1.749                                                        | 5.439                          | 1090.25            | 5929.85            | 9.512                          | 881.94             | 8388.93            |
| A_68_P27614819 | chr11:17111398-17111442                           | NM_025443:172          | Pno1          | INSIDE                 | 1.749                                                        | 2.061                          | 1394.34            | 2873.63            | 3.605                          | 1113.56            | 4013.90            |
| A_68_P29428731 | chr14:17197979-17198023                           | NM_009409:281          | Top2b         | INSIDE                 | 1.749                                                        | 2.011                          | 1529.45            | 3075.09            | 3.516                          | 1246.60            | 4382.69            |
| A_68_P27445213 | chr10:110182319-110182363                         | NM_178609:-180         | E2f7          | PROMOTER               | 1.748                                                        | 4.159                          | 772.89             | 3214.54            | 7.272                          | 770.36             | 5602.23            |
| A_68_P32213515 | chr19:58529618-58529662                           | NM_010279:-684         | Gfra1         | PROMOTER               | 1.748                                                        | 1.741                          | 4343.45            | 7562.41            | 3.044                          | 2798.64            | 8517.84            |
| A_68_P25954584 | chr8:73389578-73389623                            | NM_032397:-8693        | Kenn1         | PROMOTER               | 1.748                                                        | 1.511                          | 1699.52            | 2567.57            | 2.641                          | 1171.95            | 3095.36            |
| A_68_P26039507 | chr8:90723531-90723575                            | NM_001164497:441       | Papd5         | INSIDE                 | 1.748                                                        | 5.336                          | 3155.94            | 16841.30           | 9.330                          | 2634.39            | 24579.68           |
| A_68_P24956659 | chr7:6682310-6682354                              | NM_008817:798          | Peg3          | INSIDE                 | 1.748                                                        | 1.520                          | 829.29             | 1260.71            | 2.657                          | 758.86             | 2016.08            |
| A_68_P25265832 | chr7:87439097-87439141                            | NM_145150:-232         | Pre1          | PROMOTER               | 1.748                                                        | 5.867                          | 2742.61            | 16091.81           | 10.254                         | 2081.05            | 21339.65           |
| A_68_P23236664 | chr4:117508530-117508574                          | NM_008135:690          | Slc6a9        | INSIDE                 | 1.748                                                        | 2.240                          | 1988.17            | 4452.72            | 3.914                          | 1745.17            | 6830.68            |
| A_68_P25958205 | chr8:74195695-74195739                            | NM_001029873:-60       | Unc13a        | DIVERGENT_PROMOTER     | 1.748                                                        | 3.016                          | 8338.50            | 25152.77           | 5.272                          | 6293.49            | 33177.18           |
| A_68_P32477696 | chrX:74678992-74679036                            |                        |               | Unknown                | 1.748                                                        | 4.677                          | 553.98             | 2590.80            | 8.177                          | 333.85             | 2729.94            |
| A_68_P27900882 | chr11:70279513-70279557                           | NM_023158:-6048        | Cxcl16        | PROMOTER               | 1.747                                                        | 1.427                          | 1830.22            | 2611.27            | 2.493                          | 1401.27            | 3492.97            |
| A_68_P23103735 | chr4:91038685-91038729                            | NM_010486:40           | Elavl2        | INSIDE                 | 1.747                                                        | 4.653                          | 2752.25            | 12806.90           | 8.127                          | 2275.41            | 18493.30           |
| A_68_P28033280 | chr11:94352619-94352663                           | NM_027984:8648         | Epn3          | INSIDE                 | 1.747                                                        | 14.019                         | 1245.75            | 17463.81           | 24.492                         | 945.71             | 23162.58           |
| A_68_P25953980 | chr8:73300616-73300660                            | NM_008841:-27          | Pik3r2        | DIVERGENT_PROMOTER     | 1.747                                                        | 3.516                          | 669.06             | 2352.54            | 6.141                          | 614.17             | 3771.75            |
| A_68_P25354354 | chr7:105326624-105326668                          | NM_007602:57           | Capn5         | INSIDE                 | 1.746                                                        | 5.034                          | 1591.36            | 8011.50            | 8.790                          | 1263.09            | 11102.05           |
| A_68_P31565718 | chr18:25645741-25645785                           | NM_001146292:266722    | Celf4         | INSIDE                 | 1.746                                                        | 1.912                          | 1475.53            | 2821.49            | 3.339                          | 1166.82            | 3896.56            |
| A_68_P25957751 | chr8:74126551-74126595                            | NM_001166213:5028      | Fam129c       | INSIDE                 | 1.746                                                        | 2.904                          | 1868.37            | 5424.90            | 5.071                          | 1476.20            | 7485.77            |
| A_68_P24005517 | chr5:115140712-115140756                          | NM_019821:210          | Gltp          | INSIDE                 | 1.746                                                        | 3.422                          | 3875.07            | 13262.26           | 5.977                          | 2524.78            | 15089.95           |
| A_68_P25095297 | chr7:53075356-53075400                            | NM_145963:4739         | Kenj14        | INSIDE                 | 1.746                                                        | 3.039                          | 3221.66            | 9789.23            | 5.306                          | 2632.50            | 13967.01           |
| A_68_P23577316 | chr5:31554254-31554298                            | NM_027221:198          | Krtcap3       | INSIDE                 | 1.746                                                        | 5.588                          | 2563.92            | 14326.24           | 9.756                          | 2030.20            | 19806.48           |
| A_68_P21149827 | chr2:38544490-38544534                            | NM_139051:25550        | Nr5a1         | DOWNSTREAM             | 1.746                                                        | 3.993                          | 1793.33            | 7161.53            | 6.972                          | 1423.96            | 9927.68            |
| A_68_P26429021 | chr9:36954305-36954349                            | NM_001029838:525       | Pknox2        | INSIDE                 | 1.746                                                        | 3.693                          | 1007.30            | 3720.30            | 6.447                          | 818.84             | 5279.12            |
| A_68_P32268351 | chrX:13424038-13424082                            | NM_009806:-393         | Cask          | PROMOTER               | 1.745                                                        | 2.623                          | 3604.11            | 9455.09            | 4.577                          | 2141.76            | 9802.92            |
| A_68_P26249219 | chr8:127578258-127578302                          | NM_174853:186          | Disc1         | INSIDE                 | 1.745                                                        | 4.120                          | 16321.94           | 67241.74           | 7.190                          | 12123.42           | 87166.19           |
| A_68_P25495415 | chr7:132725071-132725115                          | NM_001008700:29297     | Il4ra         | DOWNSTREAM             | 1.745                                                        | 4.300                          | 3635.17            | 15632.42           | 7.503                          | 2918.89            | 21900.68           |
| A_68_P28291793 | chr12:25515677-25515721                           | NM_001083341:-765      | Mboat2        | PROMOTER               | 1.745                                                        | 14.968                         | 1756.93            | 26296.92           | 26.116                         | 1229.01            | 32097.13           |
| A_68_P24981209 | chr7:16973109-16973153                            | NM_019748:4            | Sae1          | INSIDE                 | 1.745                                                        | 2.708                          | 1486.23            | 4024.38            | 4.726                          | 1180.87            | 5580.70            |
| A_68_P30496205 | chr15:101966489-101966533                         | NM_001033277:136       | Spryd3        | INSIDE                 | 1.745                                                        | 2.590                          | 3279.72            | 8492.93            | 4.519                          | 2677.66            | 12099.03           |
| A_68_P31326352 | chr17:70318650-70318694                           | ENSMUST00000155823:-35 |               | PROMOTER               | 1.745                                                        | 2.085                          | 673.37             | 1403.79            | 3.638                          | 630.45             | 2293.40            |
| A_68_P26814990 | chr9:108363250-108363294                          | NM_133744:424          | Ccdc71        | INSIDE                 | 1.744                                                        | 2.571                          | 1714.86            | 4409.18            | 4.485                          | 1407.04            | 6309.96            |
| A_68_P33007798 | chr4_random:129389-129433                         | NM_001033326:19609     | Dhrsx         | INSIDE                 | 1.744                                                        | 5.327                          | 2192.86            | 11680.33           | 9.290                          | 1601.36            | 14876.20           |
| A_68_P20442011 | chr11:93263227-93263272                           | NM_173395:243          | Fam132b       | INSIDE                 | 1.744                                                        | 3.148                          | 2766.94            | 8709.43            | 5.489                          | 2276.05            | 12492.45           |
| A_68_P28177386 | chr11:119217235-119217283                         | NM_178743:388          | Slc26a11      | INSIDE                 | 1.744                                                        | 3.869                          | 1785.95            | 6909.52            | 6.749                          | 1449.59            | 9782.59            |
| A_68_P22015873 | chr3:28161770-28161814                            | NM_001163009:-343      | Tnik          | PROMOTER               | 1.744                                                        | 3.559                          | 324.25             | 1153.94            | 6.206                          | 261.68             | 1623.89            |
| A_68_P22674484 | chr3:156225009-156225062                          | NM_177274:113          | Negr1         | INSIDE                 | 1.743                                                        | 6.651                          | 2013.48            | 13392.34           | 11.594                         | 1409.31            | 16339.35           |
| A_68_P26021287 | chr8:87230962-87231012                            | NM_001081981:67282     | Nfix          | DOWNSTREAM             | 1.743                                                        | 5.485                          | 1102.57            | 6047.57            | 9.561                          | 909.77             | 8698.03            |
| A_68_P30559120 | chr16:13819791-13819845                           | NM_010946:449          | Ntan1         | INSIDE                 | 1.743                                                        | 2.431                          | 941.21             | 2287.75            | 4.237                          | 752.84             | 3189.89            |
| A_68_P31117527 | chr17:27760515-27760559                           | NM_019837:-139         | Nudt3         | PROMOTER               | 1.743                                                        | 1.917                          | 633.10             | 1213.82            | 3.342                          | 554.31             | 1852.33            |
| A_68_P21768463 | chr2:155755683-155755727                          | NM_018888:342          | Uqec          | INSIDE                 | 1.743                                                        | 3.108                          | 3340.04            | 10381.87           | 5.418                          | 2243.48            | 12155.32           |
| A_68_P27787099 | chr11:49988480-49988526                           | NM_026543:150          | 3010026O09Rik | INSIDE                 | 1.742                                                        | 1.554                          | 3080.89            | 4787.81            | 2.707                          | 2253.64            | 6101.51            |
| A_68_P26890130 | chr9:122481560-122481604                          | NR_015610:-36          | 9530059O14Rik | PROMOTER               | 1.742                                                        | 2.246                          | 822.11             | 1846.18            | 3.911                          | 742.78             | 2905.29            |
| A_68_P29526837 | chr14:34736673-34736717                           | NM_145741:-78          | Gdf10         | PROMOTER               | 1.742                                                        | 2.152                          | 3153.19            | 6786.21            | 3.750                          | 2573.87            | 9651.14            |
| A_68_P30778982 | chr16:56037716-56037760                           | NM_029092:149          | Rg9mtd1       | INSIDE                 | 1.742                                                        | 2.409                          | 1190.64            | 2868.44            | 4.197                          | 1272.69            | 5341.78            |

| ProbeName      | Target position of probe on CpG island microarray | TargetID               | GeneSymbol    | CpG island Description | Ratio of relative methylation (TiO <sub>2</sub> -NP/Vehicle) | Sham group                     |                    |                    | TiO <sub>2</sub> -H group      |                    |                    |
|----------------|---------------------------------------------------|------------------------|---------------|------------------------|--------------------------------------------------------------|--------------------------------|--------------------|--------------------|--------------------------------|--------------------|--------------------|
|                |                                                   |                        |               |                        |                                                              | Relative methylation (Cy5/Cy3) | Cy3 signal (Input) | Cy5 signal (MeDIP) | Relative methylation (Cy5/Cy3) | Cy3 signal (Input) | Cy5 signal (MeDIP) |
| A_68_P25102500 | chr7:54263669-54263713                            | NM_175318:94           | Spty2d1       | INSIDE                 | 1.742                                                        | 3.016                          | 3244.63            | 9784.45            | 5.252                          | 2553.17            | 13408.54           |
| A_68_P31315914 | chr17:68353306-68353350                           | NM_172964:120          | Arhgap28      | INSIDE                 | 1.741                                                        | 3.659                          | 2455.65            | 8984.22            | 6.368                          | 2022.42            | 12879.14           |
| A_68_P24603556 | chr6:85137482-85137526                            | NM_010131:-420         | Emx1          | PROMOTER               | 1.741                                                        | 1.686                          | 1548.80            | 2610.51            | 2.934                          | 1261.23            | 3700.15            |
| A_68_P27856227 | chr11:62693165-62693209                           | NM_026210:195          | Fam18b        | INSIDE                 | 1.741                                                        | 6.334                          | 2125.21            | 13461.23           | 11.029                         | 1638.86            | 18075.66           |
| A_68_P24535482 | chr6:71221514-71221558                            | NM_145568:-476         | Krcc1         | DIVERGENT_PROMOTER     | 1.741                                                        | 4.318                          | 2746.85            | 11859.56           | 7.516                          | 1893.83            | 14233.44           |
| A_68_P24133762 | chr5:139605565-139605609                          | NM_008923:120          | Prkar1b       | INSIDE                 | 1.741                                                        | 4.090                          | 4595.71            | 18798.29           | 7.122                          | 3413.53            | 24310.10           |
| A_68_P29612660 | chr14:55098640-55098684                           | NM_080726:3726         | Rem2          | INSIDE                 | 1.741                                                        | 2.457                          | 334.13             | 820.80             | 4.277                          | 262.63             | 1123.22            |
| A_68_P27633577 | chr11:20730971-20731015                           | NM_173752:119          | 1110067D22Rik | INSIDE                 | 1.740                                                        | 5.809                          | 1800.24            | 10457.74           | 10.107                         | 1463.09            | 14786.97           |
| A_68_P23991928 | chr5:112823693-112823737                          | NM_028386:-2481        | Asphd2        | PROMOTER               | 1.740                                                        | 4.992                          | 2724.62            | 13601.48           | 8.687                          | 2226.16            | 19338.16           |
| A_68_P22222029 | chr3:69402614-69402658                            | NM_020026:147          | B3galnt1      | INSIDE                 | 1.740                                                        | 2.676                          | 1545.57            | 4135.28            | 4.657                          | 1385.46            | 6451.65            |
| A_68_P24995306 | chr7:20382177-20382221                            | NM_001161844:-40       | Cb1c          | PROMOTER               | 1.740                                                        | 2.603                          | 3012.08            | 7840.71            | 4.530                          | 2502.69            | 11336.44           |
| A_68_P20391720 | chr1:82288083-82288127                            | NM_010570:-90          | Irs1          | PROMOTER               | 1.740                                                        | 6.741                          | 738.79             | 4980.22            | 11.731                         | 618.89             | 7260.25            |
| A_68_P27631991 | chr11:20443663-20443707                           | NM_021372:429          | Sertad2       | INSIDE                 | 1.740                                                        | 1.563                          | 615.95             | 962.46             | 2.718                          | 770.09             | 2093.18            |
| A_68_P30574719 | chr16:17619415-17619459                           | NM_001164609:-10       | Smpd4         | PROMOTER               | 1.740                                                        | 3.457                          | 1114.97            | 3854.16            | 6.013                          | 928.41             | 5582.68            |
| A_68_P29599187 | chr14:51550282-51550326                           | NM_001033271:220       | Tmem55b       | INSIDE                 | 1.740                                                        | 8.543                          | 1131.21            | 9664.49            | 14.870                         | 707.37             | 10518.48           |
| A_68_P29682512 | chr14:67627253-67627297                           | NM_009761:440          | Bnip31        | INSIDE                 | 1.739                                                        | 3.096                          | 1938.77            | 6002.12            | 5.383                          | 2240.87            | 12063.71           |
| A_68_P23279343 | chr4:125978444-125978488                          | NM_199473:14429        | Col8a2        | INSIDE                 | 1.739                                                        | 1.434                          | 1429.27            | 2050.07            | 2.494                          | 1206.55            | 3008.88            |
| A_68_P20168277 | chr1:39957569-39957613                            | NM_008696:-167         | Map4k4        | PROMOTER               | 1.739                                                        | 6.591                          | 1829.38            | 12056.65           | 11.462                         | 1482.10            | 16987.39           |
| A_68_P24758832 | chr6:113276968-113277012                          | NM_010957:21           | Ogg1          | INSIDE                 | 1.739                                                        | 4.601                          | 10666.25           | 49076.78           | 8.002                          | 7706.41            | 61667.74           |
| A_68_P29701956 | chr14:70944977-70945021                           | NM_180588:-59          | Reep4         | PROMOTER               | 1.739                                                        | 1.515                          | 696.61             | 1055.02            | 2.634                          | 767.89             | 2022.35            |
| A_68_P26555222 | chr9:59598670-59598714                            | NM_001172068:-236      | Senp8         | DIVERGENT_PROMOTER     | 1.739                                                        | 3.056                          | 1609.98            | 4920.90            | 5.317                          | 1312.18            | 6976.36            |
| A_68_P31385967 | chr17:81344527-81344571                           | NM_026516:577          | Tmem178       | INSIDE                 | 1.739                                                        | 2.003                          | 790.27             | 1582.55            | 3.483                          | 671.56             | 2339.01            |
| A_68_P20936661 | chr1:193006674-193006718                          | NM_007498:516          | Atf3          | INSIDE                 | 1.738                                                        | 7.410                          | 4368.87            | 32372.21           | 12.876                         | 3330.41            | 42883.92           |
| A_68_P29011719 | chr13:47201171-47201215                           | NM_025900:397          | Dek           | INSIDE                 | 1.738                                                        | 1.560                          | 990.11             | 1544.24            | 2.711                          | 764.35             | 2072.05            |
| A_68_P32364765 | chrX:45806673-45806717                            | NM_019680:9615         | Elf4          | INSIDE                 | 1.738                                                        | 1.635                          | 1048.84            | 1715.36            | 2.842                          | 569.64             | 1619.14            |
| A_68_P26550030 | chr9:58670732-58670776                            | NM_001081192:-564      | Hen4          | PROMOTER               | 1.738                                                        | 2.314                          | 463.53             | 1072.60            | 4.022                          | 400.76             | 1611.96            |
| A_68_P20556969 | chr1:121317983-121318027                          | NM_008381:821          | Inhbb         | INSIDE                 | 1.738                                                        | 5.199                          | 2087.36            | 10852.02           | 9.033                          | 1599.33            | 14447.15           |
| A_68_P24142218 | chr5:141083418-141083462                          | NM_008494:146          | Lfng          | INSIDE                 | 1.738                                                        | 3.087                          | 2249.66            | 6945.00            | 5.366                          | 1855.84            | 9959.10            |
| A_68_P31130455 | chr17:30024049-30024093                           | NM_001081160:757       | Mdga1         | INSIDE                 | 1.738                                                        | 2.851                          | 1712.55            | 4882.18            | 4.954                          | 1318.07            | 6529.20            |
| A_68_P27950601 | chr11:79525364-79525408                           | NR_029579:-84          | Mir193        | PROMOTER               | 1.738                                                        | 2.793                          | 2055.00            | 5739.78            | 4.854                          | 1642.00            | 7969.79            |
| A_68_P30480085 | chr15:99256217-99256261                           | NM_001001884:31941     | Nekap5l       | INSIDE                 | 1.738                                                        | 4.114                          | 1881.69            | 7740.46            | 7.150                          | 1425.95            | 10195.16           |
| A_68_P28566637 | chr12:80012969-80013013                           | NM_013738:-5065        | Plek2         | PROMOTER               | 1.738                                                        | 2.300                          | 3127.95            | 7195.06            | 3.997                          | 2381.41            | 9519.02            |
| A_68_P23234760 | chr4:117167587-117167631                          | NM_025739:1912         | Rnf220        | INSIDE                 | 1.738                                                        | 3.133                          | 2488.25            | 7795.60            | 5.446                          | 2043.22            | 11127.02           |
| A_68_P27787321 | chr11:50023806-50023850                           | NM_011018:464          | Sgstn1        | INSIDE                 | 1.738                                                        | 4.742                          | 6644.51            | 31510.94           | 8.244                          | 4503.50            | 37125.14           |
| A_68_P23298058 | chr4:129373895-129373939                          | NM_199305:166          | Tmem39b       | INSIDE                 | 1.738                                                        | 2.740                          | 2790.29            | 7644.16            | 4.761                          | 2354.98            | 11212.01           |
| A_68_P26871705 | chr9:119231516-119231560                          | ENSMUST00000128880:-98 |               | PROMOTER               | 1.738                                                        | 5.111                          | 4707.16            | 24057.97           | 8.881                          | 3557.34            | 31594.19           |
| A_68_P20165362 | chr1:39424508-39424553                            | NM_053257:-165         | Rpl31         | PROMOTER               | 1.737                                                        | 3.441                          | 688.17             | 2368.01            | 5.977                          | 527.67             | 3153.77            |
| A_68_P26397640 | chr9:30729401-30729445                            | NM_001024139:615       | Adams15       | INSIDE                 | 1.736                                                        | 2.378                          | 1314.66            | 3126.25            | 4.129                          | 962.94             | 3976.27            |
| A_68_P31762242 | chr18:62339733-62339777                           | NM_007420:-141         | Adrb2         | PROMOTER               | 1.736                                                        | 3.893                          | 1542.63            | 6005.45            | 6.760                          | 1271.57            | 8595.79            |
| A_68_P28688785 | chr12:103214150-103214194                         | NM_016856:-11          | Cpsf2         | PROMOTER               | 1.736                                                        | 1.425                          | 1111.50            | 1583.51            | 2.474                          | 1079.73            | 2670.99            |
| A_68_P26926726 | chr10:8605914-8605958                             | NM_175155:-68          | Sash1         | PROMOTER               | 1.736                                                        | 2.375                          | 1853.06            | 4400.32            | 4.123                          | 1678.72            | 6920.83            |
| A_68_P20453778 | chr1:95073519-95073563                            |                        |               | Unknown                | 1.736                                                        | 7.128                          | 2346.40            | 16725.72           | 12.378                         | 1903.78            | 23564.98           |
| A_68_P32127475 | chr19:43674323-43674367                           |                        |               | Unknown                | 1.736                                                        | 3.029                          | 4914.69            | 14886.60           | 5.260                          | 3642.82            | 19160.25           |
| A_68_P31259473 | chr17:57136900-57136944                           | NM_025538:161          | Alkbh7        | INSIDE                 | 1.735                                                        | 2.983                          | 1175.23            | 3506.23            | 5.178                          | 897.02             | 4644.46            |
| A_68_P21102918 | chr2:30248319-30248363                            | NM_020329:405          | Dolpp1        | INSIDE                 | 1.735                                                        | 4.161                          | 1997.38            | 8310.37            | 7.217                          | 1574.57            | 11363.04           |
| A_68_P26659818 | chr9:78329691-78329735                            | NM_010106:-181         | Eef1a1        | PROMOTER               | 1.735                                                        | 1.761                          | 947.75             | 1669.34            | 3.056                          | 778.65             | 2379.18            |
| A_68_P30261334 | chr15:60656407-60656451                           | NM_001162926:207       | Fam84b        | INSIDE                 | 1.735                                                        | 2.756                          | 867.52             | 2391.32            | 4.784                          | 695.50             | 3327.13            |
| A_68_P26803570 | chr9:106367374-106367418                          | NM_001159652:875       | Gpr62         | INSIDE                 | 1.735                                                        | 4.565                          | 756.92             | 3455.63            | 7.923                          | 673.99             | 5340.17            |
| A_68_P23812530 | chr5:76374553-76374597                            | NM_010612:-121         | Kdr           | PROMOTER               | 1.735                                                        | 4.224                          | 6303.13            | 26622.36           | 7.328                          | 4621.05            | 33863.12           |
| A_68_P27287865 | chr10:80630602-80630646                           | NM_021501:-159         | Pias4         | DIVERGENT_PROMOTER     | 1.735                                                        | 3.750                          | 3317.59            | 12442.19           | 6.506                          | 2416.58            | 15721.63           |
| A_68_P31295069 | chr17:64681315-64681359                           | NM_001025309:-113      | Pja2          | PROMOTER               | 1.735                                                        | 2.178                          | 911.66             | 1985.96            | 3.779                          | 794.14             | 3001.14            |

| ProbeName      | Target position of probe on CpG island microarray | TargetID          | GeneSymbol    | CpG island Description | Ratio of relative methylation (TiO <sub>2</sub> -NP/Vehicle) | Sham group                     |                    |                    | TiO <sub>2</sub> -H group      |                    |                    |
|----------------|---------------------------------------------------|-------------------|---------------|------------------------|--------------------------------------------------------------|--------------------------------|--------------------|--------------------|--------------------------------|--------------------|--------------------|
|                |                                                   |                   |               |                        |                                                              | Relative methylation (Cy5/Cy3) | Cy3 signal (Input) | Cy5 signal (MeDIP) | Relative methylation (Cy5/Cy3) | Cy3 signal (Input) | Cy5 signal (MeDIP) |
| A_68_P26725648 | chr9:92145271-92145315                            | NM_011636:261     | Plscr1        | INSIDE                 | 1.735                                                        | 3.586                          | 4101.69            | 14709.23           | 6.221                          | 3012.57            | 18741.24           |
| A_68_P26574057 | chr9:62986883-62986927                            | NM_172446:7883    | Skor1         | INSIDE                 | 1.735                                                        | 6.931                          | 588.37             | 4077.83            | 12.028                         | 469.55             | 5647.64            |
| A_68_P25537056 | chr7:140005623-140005667                          | NM_212473:-765    | Fam53b        | PROMOTER               | 1.734                                                        | 2.759                          | 1651.86            | 4558.12            | 4.785                          | 1316.60            | 6299.36            |
| A_68_P20967784 | chr2:4322707-4322751                              | NM_001177843:707  | Frmtd4a       | INSIDE                 | 1.734                                                        | 4.722                          | 12366.15           | 58388.60           | 8.189                          | 8550.72            | 70023.36           |
| A_68_P24904258 | chr6:142336086-142336130                          | NM_025872:346     | Golt1b        | INSIDE                 | 1.734                                                        | 1.677                          | 823.66             | 1381.09            | 2.908                          | 721.84             | 2098.75            |
| A_68_P30482738 | chr15:99705731-99705775                           | NM_001113545:135  | Lima1         | INSIDE                 | 1.734                                                        | 5.138                          | 2702.22            | 13884.57           | 8.908                          | 2227.72            | 19845.29           |
| A_68_P22313622 | chr3:88214207-88214256                            | NM_025928:7       | Pmf1          | INSIDE                 | 1.734                                                        | 3.408                          | 876.38             | 2986.69            | 5.908                          | 678.82             | 4010.58            |
| A_68_P30013962 | chr15:10966866-10966910                           | NM_178717:835     | Rxfp3         | INSIDE                 | 1.734                                                        | 6.001                          | 3825.75            | 22960.00           | 10.408                         | 2752.13            | 28644.35           |
| A_68_P20505897 | chr1:107890521-107890565                          | NM_001122675:3560 | Zecche2       | INSIDE                 | 1.734                                                        | 3.021                          | 2180.83            | 6589.31            | 5.239                          | 1749.16            | 9164.54            |
| A_68_P23282958 | chr4:126644783-126644827                          | NM_001114399:363  | Zmym4         | INSIDE                 | 1.734                                                        | 6.315                          | 4207.22            | 26569.82           | 10.948                         | 3446.79            | 37736.43           |
| A_68_P23542143 | chr5:23988482-23988526                            | NM_139153:30510   | Agap3         | INSIDE                 | 1.733                                                        | 5.843                          | 4665.00            | 27259.61           | 10.129                         | 3513.02            | 35584.60           |
| A_68_P25022916 | chr7:29415707-29415751                            | NM_175319:306     | C330005M16Rik | INSIDE                 | 1.733                                                        | 1.796                          | 1168.65            | 2099.07            | 3.113                          | 1029.93            | 3205.78            |
| A_68_P32380511 | chrX:49517673-49517717                            | NM_008150:406     | Gpc4          | INSIDE                 | 1.733                                                        | 3.289                          | 1340.52            | 4408.65            | 5.699                          | 855.74             | 4877.06            |
| A_68_P25952867 | chr8:73118782-73118826                            | NM_023627:425     | Isyna1        | INSIDE                 | 1.733                                                        | 1.577                          | 1487.43            | 2345.26            | 2.732                          | 1207.58            | 3299.13            |
| A_68_P24946817 | chr7:3637393-3637437                              | NM_029934:7713    | Mboat7        | INSIDE                 | 1.733                                                        | 4.064                          | 2244.83            | 9124.02            | 7.046                          | 1661.51            | 11706.57           |
| A_68_P31929629 | chr19:5602275-5602319                             | NM_026616:424     | Rnaseh2c      | INSIDE                 | 1.733                                                        | 2.818                          | 461.91             | 1301.47            | 4.883                          | 438.90             | 2143.20            |
| A_68_P31209382 | chr17:47026332-47026376                           | NM_178385:-1215   | Tbcc          | PROMOTER               | 1.733                                                        | 4.014                          | 1076.92            | 4322.30            | 6.957                          | 914.68             | 6363.05            |
| A_68_P33005868 | A_68_P33005868                                    |                   | Unknown       | Unknown                | 1.733                                                        | 6.745                          | 406.82             | 2743.92            | 11.687                         | 336.19             | 3929.21            |
| A_68_P26469462 | chr9:44575608-44575652                            | NM_145985:261     | Aren1         | INSIDE                 | 1.732                                                        | 4.073                          | 1190.06            | 4847.60            | 7.057                          | 1021.52            | 7208.99            |
| A_68_P22971150 | chr4:63206034-63206078                            | NM_024173:258     | Atp6v1g1      | INSIDE                 | 1.732                                                        | 4.331                          | 2368.67            | 10258.41           | 7.501                          | 2015.75            | 15119.91           |
| A_68_P27003030 | chr10:23069823-23069869                           | NM_010167:-137    | Eya4          | PROMOTER               | 1.732                                                        | 3.286                          | 434.32             | 1427.34            | 5.692                          | 439.18             | 2499.66            |
| A_68_P28745894 | chr12:112997376-112997420                         | NM_008450:339     | Klc1          | INSIDE                 | 1.732                                                        | 1.607                          | 6227.53            | 10010.32           | 2.783                          | 4582.88            | 12756.15           |
| A_68_P20797864 | chr1:167933679-167933723                          | NM_011137:-935    | Pou2f1        | PROMOTER               | 1.732                                                        | 4.747                          | 1600.53            | 7598.07            | 8.223                          | 1240.42            | 10199.96           |
| A_68_P22182581 | chr3:61168376-61168420                            | NM_028712:-30     | Rap2b         | PROMOTER               | 1.732                                                        | 3.914                          | 4615.79            | 18064.14           | 6.779                          | 3329.52            | 22571.76           |
| A_68_P23402414 | chr4:149148446-149148491                          | NM_027460:-92     | Slc25a33      | PROMOTER               | 1.732                                                        | 6.311                          | 5319.73            | 33572.15           | 10.928                         | 4115.00            | 44966.77           |
| A_68_P27935204 | chr11:76811878-76811922                           | NM_010484:-198    | Slc6a4        | PROMOTER               | 1.732                                                        | 2.191                          | 1262.92            | 2767.27            | 3.795                          | 1066.19            | 4046.40            |
| A_68_P23310689 | chr4:131767916-131767960                          | NM_145393:233     | Ythdf2        | INSIDE                 | 1.732                                                        | 4.831                          | 8487.61            | 41002.43           | 8.366                          | 6485.99            | 54258.90           |
| A_68_P26237605 | chr8:125566196-125566241                          | NM_001081379:-34  | Ankrd11       | PROMOTER               | 1.731                                                        | 2.847                          | 2956.92            | 8417.35            | 4.926                          | 2522.15            | 12425.07           |
| A_68_P20101394 | chr1:25886869-25886913                            | NM_175642:-338    | Bai3          | PROMOTER               | 1.731                                                        | 6.315                          | 3410.04            | 21533.82           | 10.933                         | 2400.03            | 26238.94           |
| A_68_P25609544 | chr7:152024886-152024930                          | NM_008007:392     | Fgf3          | INSIDE                 | 1.731                                                        | 2.429                          | 1335.04            | 3242.95            | 4.204                          | 1106.16            | 4650.24            |
| A_68_P21078770 | chr2:26301305-26301349                            | NM_153125:-590    | Sec16a        | PROMOTER               | 1.731                                                        | 2.186                          | 792.56             | 1732.82            | 3.784                          | 665.25             | 2517.04            |
| A_68_P24432387 | chr6:49345594-49345638                            | NM_029916:14      | Stk31         | INSIDE                 | 1.731                                                        | 6.766                          | 7487.28            | 50658.23           | 11.713                         | 5534.60            | 64827.12           |
| A_68_P26242939 | chr8:126544720-126544764                          | NM_133966:467     | Taf5l         | INSIDE                 | 1.731                                                        | 7.775                          | 676.84             | 5262.41            | 13.462                         | 525.48             | 7074.04            |
| A_68_P22449315 | chr3:116126619-116126663                          | NM_001080818:310  | Cdc14a        | INSIDE                 | 1.730                                                        | 3.289                          | 1221.99            | 4019.51            | 5.690                          | 1102.08            | 6270.97            |
| A_68_P27094083 | chr10:41996329-41996375                           | NM_019740:196     | Foxo3         | INSIDE                 | 1.730                                                        | 2.798                          | 733.02             | 2050.96            | 4.841                          | 674.74             | 3266.23            |
| A_68_P31632704 | chr18:38371400-38371444                           | NM_029357:-2006   | Pedh1         | PROMOTER               | 1.730                                                        | 3.324                          | 1831.38            | 6088.28            | 5.751                          | 1438.68            | 8273.75            |
| A_68_P26773477 | chr9:101153798-101153842                          | NM_001161362:342  | Ppp2r3a       | INSIDE                 | 1.730                                                        | 1.698                          | 791.47             | 1343.88            | 2.937                          | 672.35             | 1974.64            |
| A_68_P27311096 | chr10:85379833-85379877                           | NM_181650:-164    | Prdm4         | PROMOTER               | 1.730                                                        | 3.434                          | 1386.39            | 4760.46            | 5.939                          | 1135.23            | 6742.20            |
| A_68_P31513736 | chr18:14841066-14841110                           | NM_001161369:335  | Ss18          | INSIDE                 | 1.730                                                        | 1.539                          | 893.89             | 1376.05            | 2.663                          | 779.30             | 2075.10            |
| A_68_P24760447 | chr6:113554719-113554763                          | NM_133937:-25     | 6720456B07Rik | DIVERGENT_PROMOTER     | 1.729                                                        | 29.247                         | 415.36             | 12148.19           | 50.565                         | 408.90             | 20675.97           |
| A_68_P31760609 | chr18:62071314-62071358                           | NM_198649:142     | Ablim3        | INSIDE                 | 1.729                                                        | 2.646                          | 1903.66            | 5036.37            | 4.575                          | 1574.24            | 7201.53            |
| A_68_P29047192 | chr13:54150550-54150594                           | NM_010076:455     | Drd1a         | INSIDE                 | 1.729                                                        | 3.605                          | 1644.59            | 5928.09            | 6.233                          | 1271.41            | 7925.09            |
| A_68_P23513989 | chr5:18732427-18732471                            | NM_001170746:-415 | Magi2         | PROMOTER               | 1.729                                                        | 5.351                          | 1454.92            | 7784.77            | 9.253                          | 1263.72            | 11692.73           |
| A_68_P24537769 | chr6:71657624-71657668                            | NM_178608:-28     | Reep1         | PROMOTER               | 1.729                                                        | 4.365                          | 558.91             | 2439.40            | 7.545                          | 446.64             | 3369.74            |
| A_68_P32906199 | A_68_P32906199                                    |                   | Unknown       | Unknown                | 1.729                                                        | 8.050                          | 1059.06            | 8524.89            | 13.918                         | 818.63             | 11394.02           |
| A_68_P24980671 | chr7:16871769-16871813                            | NM_172297:-1782   | Ccdc9         | PROMOTER               | 1.728                                                        | 4.829                          | 18022.74           | 87028.16           | 8.343                          | 12430.23           | 103702.10          |
| A_68_P32539664 | chrX:91881437-91881481                            | NM_008179:51      | Gsp2l         | INSIDE                 | 1.728                                                        | 1.532                          | 1092.11            | 1672.96            | 2.647                          | 546.98             | 1447.80            |
| A_68_P28693227 | chr12:103943323-103943367                         | NM_172584:-265    | Itpk1         | PROMOTER               | 1.728                                                        | 5.248                          | 811.62             | 4259.30            | 9.070                          | 709.53             | 6435.19            |
| A_68_P23253010 | chr4:120419437-120419481                          | NM_001081142:323  | Kenq4         | INSIDE                 | 1.728                                                        | 2.460                          | 1299.17            | 3195.38            | 4.251                          | 1082.81            | 4602.51            |
| A_68_P22157978 | chr3:55987140-55987184                            | NM_030595:461     | Nbea          | INSIDE                 | 1.728                                                        | 4.480                          | 1138.19            | 5099.45            | 7.741                          | 981.53             | 7598.19            |
| A_68_P29599189 | chr14:51550570-51550614                           | NM_001033271:-68  | Tmem55b       | PROMOTER               | 1.728                                                        | 6.256                          | 6967.38            | 43587.79           | 10.809                         | 5207.44            | 56284.93           |

| ProbeName      | Target position of probe on CpG island microarray | TargetID                | GeneSymbol    | CpG island Description | Ratio of relative methylation (TiO <sub>2</sub> -NP/Vehicle) | Sham group                     |                    |                    | TiO <sub>2</sub> -H group      |                    |                    |
|----------------|---------------------------------------------------|-------------------------|---------------|------------------------|--------------------------------------------------------------|--------------------------------|--------------------|--------------------|--------------------------------|--------------------|--------------------|
|                |                                                   |                         |               |                        |                                                              | Relative methylation (Cy5/Cy3) | Cy3 signal (Input) | Cy5 signal (MeDIP) | Relative methylation (Cy5/Cy3) | Cy3 signal (Input) | Cy5 signal (MeDIP) |
| A_68_P29509872 | chr14:31942367-31942412                           | NR_024069:-273          | 2010107H07Rik | DIVERGENT_PROMOTER     | 1.727                                                        | 3.207                          | 2485.55            | 7970.80            | 5.539                          | 2061.63            | 11419.23           |
| A_68_P30150544 | chr15:38591583-38591627                           | NM_025494:-54           | Atp6v1c1      | PROMOTER               | 1.727                                                        | 3.206                          | 1534.77            | 4919.78            | 5.535                          | 1234.99            | 6835.11            |
| A_68_P32130475 | chr19:44181890-44181934                           | NM_001162410:55         | Chuk          | INSIDE                 | 1.727                                                        | 3.622                          | 678.44             | 2457.12            | 6.254                          | 590.49             | 3693.13            |
| A_68_P22752471 | chr4:15872402-15872446                            | NM_026172:230           | Decr1         | INSIDE                 | 1.727                                                        | 2.505                          | 2768.71            | 6935.72            | 4.326                          | 2314.43            | 10012.17           |
| A_68_P28266974 | chr12:16817834-16817878                           | NM_033270:86            | E2f6          | INSIDE                 | 1.727                                                        | 3.658                          | 1329.30            | 4862.99            | 6.319                          | 1114.54            | 7042.68            |
| A_68_P29059430 | chr13:56236999-56237043                           | NM_001159513:-109       | H2afy         | PROMOTER               | 1.727                                                        | 2.959                          | 648.32             | 1918.32            | 5.110                          | 510.41             | 2608.02            |
| A_68_P26954148 | chr10:13684931-13684975                           | NM_010437:-1232         | Hivep2        | PROMOTER               | 1.727                                                        | 4.565                          | 2223.13            | 10147.80           | 7.885                          | 1782.67            | 14056.88           |
| A_68_P23288232 | chr4:127666279-127666323                          | ENSMUST00000144298:1013 |               | INSIDE                 | 1.727                                                        | 2.333                          | 1772.54            | 4135.39            | 4.030                          | 1329.21            | 5356.51            |
| A_68_P29410675 | chr14:13178814-13178858                           | NM_080433:-457          | Fezf2         | PROMOTER               | 1.726                                                        | 2.747                          | 1144.71            | 3144.30            | 4.740                          | 883.06             | 4185.46            |
| A_68_P28691644 | chr12:103707806-103707850                         | NM_013747:-291          | Golga5        | PROMOTER               | 1.726                                                        | 2.151                          | 1836.11            | 3949.73            | 3.712                          | 1527.76            | 5671.67            |
| A_68_P22448215 | chr3:115955466-115955511                          | NM_022427:914           | Gpr88         | INSIDE                 | 1.726                                                        | 2.313                          | 6031.43            | 13952.53           | 3.992                          | 4318.84            | 17240.68           |
| A_68_P22393109 | chr3:104584285-104584329                          | NM_027982:333           | Ppm1j         | INSIDE                 | 1.726                                                        | 8.053                          | 2584.88            | 20816.80           | 13.897                         | 2145.43            | 29815.76           |
| A_68_P31341464 | chr17:72953935-72953979                           | NM_007439:-309          | Alk           | PROMOTER               | 1.725                                                        | 3.540                          | 6394.26            | 22635.29           | 6.108                          | 5150.08            | 31456.16           |
| A_68_P27234932 | chr10:70807397-70807441                           | NM_134007:179           | Cisd1         | INSIDE                 | 1.725                                                        | 5.434                          | 743.69             | 4041.59            | 9.376                          | 605.45             | 5676.99            |
| A_68_P28974187 | chr13:40826726-40826770                           | NM_001122948:-936       | Tcfap2a       | PROMOTER               | 1.725                                                        | 2.982                          | 3597.64            | 10726.98           | 5.142                          | 2801.51            | 14405.41           |
| A_68_P22708703 | chr4:6917953-6917997                              | NM_145711:-104          | Tox           | PROMOTER               | 1.725                                                        | 3.353                          | 5320.50            | 17841.79           | 5.786                          | 4525.23            | 26181.49           |
| A_68_P29733553 | chr14:76816095-76816139                           | NM_207652:489           | Tsc22d1       | INSIDE                 | 1.725                                                        | 3.435                          | 3654.98            | 12555.67           | 5.926                          | 2628.47            | 15576.82           |
| A_68_P24152597 | chr5:143106025-143106069                          | NM_178398:509           | Wipi2         | INSIDE                 | 1.725                                                        | 2.031                          | 1971.87            | 4004.07            | 3.502                          | 1589.00            | 5564.96            |
| A_68_P20350627 | chr1:74849814-74849858                            | NM_009518:11244         | Wnt10a        | INSIDE                 | 1.725                                                        | 3.465                          | 3093.07            | 10717.89           | 5.977                          | 2626.35            | 15696.38           |
| A_68_P23865427 | chr5:87233816-87233860                            | NM_177680:324           | Ythdc1        | INSIDE                 | 1.725                                                        | 1.739                          | 413.95             | 720.01             | 3.000                          | 361.58             | 1084.78            |
| A_68_P31620318 | chr18:35991596-35991640                           | NM_133687:2147          | Cxxc5         | INSIDE                 | 1.724                                                        | 1.975                          | 1603.91            | 3166.95            | 3.404                          | 1180.80            | 4019.63            |
| A_68_P24620361 | chr6:88149067-88149115                            | NM_008090:433           | Gata2         | INSIDE                 | 1.724                                                        | 1.904                          | 294.63             | 560.86             | 3.281                          | 247.73             | 812.77             |
| A_68_P31127484 | chr17:29484749-29484793                           | NM_019880:79            | Mtch1         | INSIDE                 | 1.724                                                        | 3.035                          | 1442.67            | 4378.91            | 5.232                          | 1135.57            | 5941.51            |
| A_68_P27483044 | chr10:117229909-117229953                         | NM_134010:-169          | Nup107        | PROMOTER               | 1.724                                                        | 2.587                          | 4878.89            | 12620.43           | 4.460                          | 3749.15            | 16720.20           |
| A_68_P31654583 | chr18:42435328-42435372                           | NM_172626:344           | Rbm27         | INSIDE                 | 1.724                                                        | 3.406                          | 3192.91            | 10873.86           | 5.870                          | 2639.01            | 15490.72           |
| A_68_P23331724 | chr4:135577368-135577412                          | NM_013736:174           | Tceb3         | INSIDE                 | 1.724                                                        | 5.009                          | 4526.26            | 22670.37           | 8.633                          | 3689.98            | 31854.49           |
| A_68_P23982393 | chr5:111308521-111308565                          | NM_024477:-279          | Tue28         | PROMOTER               | 1.724                                                        | 6.433                          | 286.30             | 1841.66            | 11.088                         | 176.30             | 1954.72            |
| A_68_P31464043 | chr18:4635545-4635589                             | NM_001081963:640        | 9430020K01Rik | INSIDE                 | 1.723                                                        | 2.340                          | 2351.10            | 5500.43            | 4.031                          | 2007.10            | 8090.87            |
| A_68_P26954155 | chr10:13685730-13685774                           | NM_010437:-432          | Hivep2        | PROMOTER               | 1.723                                                        | 4.479                          | 4379.25            | 19614.59           | 7.715                          | 3569.73            | 27541.79           |
| A_68_P24624872 | chr6:88848652-88848696                            | NM_008564:100           | Mcm2          | INSIDE                 | 1.723                                                        | 2.710                          | 2143.08            | 5807.63            | 4.668                          | 1669.78            | 7794.48            |
| A_68_P29613302 | chr14:55236499-55236543                           | NR_030457:-898          | Mir686        | PROMOTER               | 1.723                                                        | 4.302                          | 368.61             | 1585.89            | 7.412                          | 316.57             | 2346.51            |
| A_68_P20147266 | chr1:36326391-36326435                            | NM_153408:3858          | Neur13        | INSIDE                 | 1.723                                                        | 2.008                          | 1892.51            | 3800.04            | 3.460                          | 1405.54            | 4862.79            |
| A_68_P32201471 | chr19:56623197-56623241                           | NM_025811:468           | Nhlrc2        | INSIDE                 | 1.723                                                        | 2.753                          | 677.65             | 1865.37            | 4.743                          | 532.80             | 2526.87            |
| A_68_P21871010 | chr2:173484993-173485037                          | NR_027957:26            | Ppp4r1l-ps    | INSIDE                 | 1.723                                                        | 4.435                          | 2241.73            | 9941.73            | 7.641                          | 1850.19            | 14137.33           |
| A_68_P23393512 | chr4:147662081-147662125                          | NM_001083342:-28        | Ptchd2        | PROMOTER               | 1.723                                                        | 2.265                          | 1585.17            | 3590.51            | 3.903                          | 1302.94            | 5085.97            |
| A_68_P27234632 | chr10:70747404-70747448                           | NM_145420:584           | Ube2d1        | INSIDE                 | 1.723                                                        | 4.515                          | 3345.42            | 15106.07           | 7.781                          | 2432.05            | 18923.28           |
| A_68_P23409805 | chr4:150432256-150432300                          | NM_009498:-216          | Vamp3         | PROMOTER               | 1.723                                                        | 5.061                          | 4467.10            | 22606.50           | 8.719                          | 3000.37            | 26159.48           |
| A_68_P31154661 | A_68_P31154661                                    |                         |               | Unknown                | 1.723                                                        | 5.020                          | 1377.34            | 6913.80            | 8.649                          | 935.76             | 8093.31            |
| A_68_P21071854 | chr2:25251918-25251962                            | NM_009849:547           | Entpd2        | INSIDE                 | 1.722                                                        | 4.180                          | 2448.06            | 10232.39           | 7.196                          | 1935.00            | 13923.72           |
| A_68_P29644193 | chr14:60997735-60997779                           | NM_001164705:634        | Fam123a       | INSIDE                 | 1.722                                                        | 3.402                          | 1085.16            | 3691.29            | 5.858                          | 923.00             | 5406.96            |
| A_68_P28084547 | chr11:103173618-103173663                         |                         |               | Unknown                | 1.722                                                        | 1.532                          | 679.97             | 1041.72            | 2.638                          | 547.69             | 1444.83            |
| A_68_P28859763 | chr13:19040669-19040713                           | NM_175007:451           | Amph          | INSIDE                 | 1.721                                                        | 4.158                          | 662.80             | 2756.07            | 7.158                          | 559.15             | 4002.62            |
| A_68_P24172967 | chr5:148116571-148116615                          | NM_007673:2233          | Cdx2          | INSIDE                 | 1.721                                                        | 4.316                          | 1295.33            | 5590.72            | 7.427                          | 1017.59            | 7557.83            |
| A_68_P30588586 | chr16:20630082-20630126                           | NM_139293:181           | Eec2          | INSIDE                 | 1.721                                                        | 2.516                          | 2058.37            | 5178.35            | 4.328                          | 1688.09            | 7306.66            |
| A_68_P28334082 | chr12:32634899-32634943                           | NM_153198:480           | Hbp1          | INSIDE                 | 1.721                                                        | 1.569                          | 1598.61            | 2508.49            | 2.700                          | 1307.28            | 3530.14            |
| A_68_P25474216 | chr7:128643864-128643910                          | NM_001081327:108077     | Hs3st2        | INSIDE                 | 1.721                                                        | 7.977                          | 1898.20            | 15141.20           | 13.728                         | 1434.35            | 19691.47           |
| A_68_P25168663 | chr7:69493375-69493419                            | NM_010882:234           | Ndn           | INSIDE                 | 1.721                                                        | 5.983                          | 1564.06            | 9357.36            | 10.297                         | 1409.83            | 14516.67           |
| A_68_P29117519 | chr13:69878102-69878146                           | NM_001145162:651        | Ube2q11       | INSIDE                 | 1.721                                                        | 3.906                          | 4725.31            | 18459.07           | 6.724                          | 3879.84            | 26087.56           |
| A_68_P32573117 | chrX:100677336-100677380                          | NR_001463:1214          | Xist          | INSIDE                 | 1.721                                                        | 2.053                          | 4041.71            | 8298.95            | 3.533                          | 1728.31            | 6105.93            |
| A_68_P27287617 | chr10:80598897-80598941                           | NM_010731:-97           | Zbtb7a        | PROMOTER               | 1.721                                                        | 3.469                          | 1436.35            | 4982.19            | 5.968                          | 1224.08            | 7305.29            |
| A_68_P26217897 | chr8:122625576-122625620                          | NM_133967:-226          | Zdhc7         | PROMOTER               | 1.721                                                        | 1.447                          | 1487.66            | 2151.96            | 2.490                          | 1206.32            | 3003.91            |

| ProbeName      | Target position of probe on CpG island microarray | TargetID                 | GeneSymbol    | CpG island Description | Ratio of relative methylation (TiO <sub>2</sub> -NP/Vehicle) | Sham group                     |                    |                    | TiO <sub>2</sub> -H group      |                    |                    |
|----------------|---------------------------------------------------|--------------------------|---------------|------------------------|--------------------------------------------------------------|--------------------------------|--------------------|--------------------|--------------------------------|--------------------|--------------------|
|                |                                                   |                          |               |                        |                                                              | Relative methylation (Cy5/Cy3) | Cy3 signal (Input) | Cy5 signal (MeDIP) | Relative methylation (Cy5/Cy3) | Cy3 signal (Input) | Cy5 signal (MeDIP) |
| A_68_P26721663 | chr9:91278946-91278990                            | NM_009576:15159          | Zic4          | INSIDE                 | 1.721                                                        | 2.922                          | 909.30             | 2656.60            | 5.028                          | 697.42             | 3506.49            |
| A_68_P30534202 | A_68_P30534202                                    |                          |               | Unknown                | 1.721                                                        | 3.265                          | 1026.16            | 3350.15            | 5.619                          | 897.05             | 5040.94            |
| A_68_P28736910 | chr12:111426306-111426350                         | AK044800:543             |               | INSIDE                 | 1.721                                                        | 12.342                         | 2821.20            | 34819.40           | 21.240                         | 1891.38            | 40173.25           |
| A_68_P22888792 | chr4:46464440-46464484                            | NM_130889:474            | Anp32b        | INSIDE                 | 1.720                                                        | 3.243                          | 3492.38            | 11327.10           | 5.578                          | 2955.22            | 16483.79           |
| A_68_P26846741 | chr9:114753280-114753324                          | NM_027294:32             | Cmtm8         | PROMOTER               | 1.720                                                        | 4.235                          | 8858.42            | 37512.78           | 7.283                          | 7283.97            | 53046.75           |
| A_68_P22318578 | chr3:89126786-89126830                            | NM_010108:-7             | Efna3         | PROMOTER               | 1.720                                                        | 1.555                          | 6323.19            | 9831.44            | 2.675                          | 4671.38            | 12494.26           |
| A_68_P24329145 | chr6:29866863-29866907                            | NM_001037740:-128        | Fam40b        | PROMOTER               | 1.720                                                        | 3.229                          | 355.25             | 1147.20            | 5.556                          | 308.76             | 1715.42            |
| A_68_P23929939 | chr5:100929613-100929657                          | NM_001115010:-2042       | Lin54         | PROMOTER               | 1.720                                                        | 3.153                          | 2338.54            | 7372.86            | 5.423                          | 1885.87            | 10226.99           |
| A_68_P25375583 | chr7:108967177-108967221                          | NM_008887:372            | Phox2a        | INSIDE                 | 1.720                                                        | 5.525                          | 3288.44            | 18167.43           | 9.503                          | 2745.79            | 26092.66           |
| A_68_P28203004 | chr12:4924079-4924123                             | NM_001099628:-58         | Atad2b        | DIVERGENT_PROMOTER     | 1.719                                                        | 5.477                          | 1128.71            | 6182.38            | 9.415                          | 915.99             | 8624.10            |
| A_68_P23647570 | chr5:44173303-44173347                            | NM_001159963:64          | Fbxl5         | INSIDE                 | 1.719                                                        | 3.873                          | 1869.08            | 7238.82            | 6.659                          | 1685.32            | 11222.52           |
| A_68_P29928904 | chr14:117325550-117325594                         | NM_001079844:1036        | Gpc6          | INSIDE                 | 1.719                                                        | 2.874                          | 1535.27            | 4413.00            | 4.941                          | 1284.53            | 6347.51            |
| A_68_P30577450 | chr16:18088960-18089004                           | NM_011172:301            | Prodh         | INSIDE                 | 1.719                                                        | 2.615                          | 2729.88            | 7138.39            | 4.496                          | 2107.54            | 9475.10            |
| A_68_P23236670 | chr4:117509289-117509333                          | NM_008135:1448           | Slec6a9       | INSIDE                 | 1.719                                                        | 3.621                          | 3065.86            | 11101.40           | 6.224                          | 2295.46            | 14288.00           |
| A_68_P25005464 | chr7:25332066-25332110                            | NM_009532:-80            | Xrcc1         | DIVERGENT_PROMOTER     | 1.719                                                        | 2.836                          | 1884.27            | 5344.33            | 4.875                          | 1417.59            | 6910.93            |
| A_68_P24624504 | chr6:88791715-88791759                            | NM_030251:193            | Abtb1         | INSIDE                 | 1.718                                                        | 3.548                          | 10382.55           | 36839.75           | 6.095                          | 6985.27            | 42572.99           |
| A_68_P25578895 | chr7:146768050-146768094                          | NR_027857:624            | Nkx6-2        | INSIDE                 | 1.718                                                        | 3.426                          | 1968.92            | 6745.40            | 5.887                          | 1554.74            | 9153.31            |
| A_68_P28781792 | chr12:120075230-120075274                         | NM_177082:-9549          | Sp8           | PROMOTER               | 1.718                                                        | 2.608                          | 3721.05            | 9704.84            | 4.481                          | 2814.29            | 12609.79           |
| A_68_P21568536 | chr2:119063328-119063372                          | NM_016907:255            | Spint1        | INSIDE                 | 1.718                                                        | 2.031                          | 3187.21            | 6473.42            | 3.490                          | 2311.72            | 8067.09            |
| A_68_P21075771 | chr2:25877080-25877124                            | NM_133835:178            | Ubac1         | INSIDE                 | 1.718                                                        | 3.692                          | 611.91             | 2259.37            | 6.342                          | 595.33             | 3775.64            |
| A_68_P22483663 | chr3:122321938-122321982                          | NM_001114665:625         | Fnbp11        | INSIDE                 | 1.717                                                        | 5.718                          | 894.16             | 5113.21            | 9.819                          | 840.35             | 8251.31            |
| A_68_P28540462 | chr12:75009562-75009606                           | NM_010431:731            | Hif1a         | INSIDE                 | 1.717                                                        | 3.450                          | 1890.74            | 6523.81            | 5.924                          | 1556.06            | 9217.74            |
| A_68_P23936334 | chr5:102093547-102093591                          | NM_144955:162            | Nkx6-1        | INSIDE                 | 1.717                                                        | 1.920                          | 2360.88            | 4532.33            | 3.297                          | 1938.13            | 6389.91            |
| A_68_P30344883 | chr15:75740087-75740131                           | NM_178646:-56            | Tigd5         | DIVERGENT_PROMOTER     | 1.717                                                        | 4.105                          | 2199.15            | 9027.46            | 7.048                          | 1901.13            | 13399.69           |
| A_68_P27693346 | chr11:33101716-33101763                           | NM_019916:1849           | Tlx3          | INSIDE                 | 1.717                                                        | 4.968                          | 736.97             | 3661.61            | 8.529                          | 543.56             | 4636.17            |
| A_68_P24091293 | chr5:130418207-130418251                          | NM_001001327:246         | Vkore11       | INSIDE                 | 1.717                                                        | 6.268                          | 943.56             | 5914.16            | 10.764                         | 1054.67            | 11352.37           |
| A_68_P30481041 | chr15:99414682-99414726                           | NM_009699:5218           | Aqp2          | INSIDE                 | 1.716                                                        | 3.349                          | 1478.19            | 4949.91            | 5.747                          | 1177.19            | 6764.97            |
| A_68_P26727067 | chr9:92437602-92437647                            | NR_029474:83             | B430319G15Rik | INSIDE                 | 1.716                                                        | 3.978                          | 2810.97            | 11182.00           | 6.828                          | 2049.32            | 13992.34           |
| A_68_P24607367 | chr6:85911667-85911711                            | NM_028099:-27            | Dusp11        | PROMOTER               | 1.716                                                        | 2.947                          | 1375.74            | 4054.99            | 5.058                          | 1093.69            | 5531.42            |
| A_68_P20849151 | chr1:177555721-177555765                          | NM_010209:24             | Fhl1          | INSIDE                 | 1.716                                                        | 3.071                          | 7119.66            | 21865.76           | 5.271                          | 5290.52            | 27886.33           |
| A_68_P24449298 | chr6:52184077-52184121                            | NM_008263:840            | Hoxa10        | INSIDE                 | 1.716                                                        | 5.558                          | 1152.59            | 6405.71            | 9.538                          | 928.05             | 8852.16            |
| A_68_P31515584 | chr18:15221979-15222023                           | NM_001142731:91          | Ketd1         | INSIDE                 | 1.716                                                        | 3.299                          | 1144.74            | 3776.04            | 5.660                          | 975.32             | 5519.95            |
| A_68_P23399809 | chr4:148681348-148681392                          | NM_207682:437            | Kif1b         | INSIDE                 | 1.716                                                        | 3.683                          | 258.15             | 950.86             | 6.319                          | 229.26             | 1448.71            |
| A_68_P28915541 | chr13:30228560-30228604                           | NM_153546:224            | Mboat1        | INSIDE                 | 1.716                                                        | 4.650                          | 5057.74            | 23518.34           | 7.979                          | 3984.22            | 31790.67           |
| A_68_P23985683 | chr5:111849467-111849511                          | NM_001081235:2303        | Mn1           | INSIDE                 | 1.716                                                        | 3.154                          | 537.33             | 1694.76            | 5.412                          | 481.21             | 2604.08            |
| A_68_P24904253 | chr6:142335519-142335563                          | NM_001204907:67          | Recql         | INSIDE                 | 1.716                                                        | 2.797                          | 4496.67            | 12578.37           | 4.800                          | 3780.54            | 18145.67           |
| A_68_P26890104 | chr9:122477963-122478007                          | NR_015610:-3634          | 9530059O14Rik | PROMOTER               | 1.715                                                        | 2.017                          | 1416.52            | 2857.29            | 3.459                          | 1128.93            | 3905.17            |
| A_68_P23612481 | chr5:37633390-37633434                            | NM_007765:-3618          | Crmp1         | PROMOTER               | 1.715                                                        | 4.336                          | 649.92             | 2817.97            | 7.435                          | 538.48             | 4003.66            |
| A_68_P30253796 | chr15:59205558-59205602                           | NM_153548:127            | E430025E21Rik | INSIDE                 | 1.715                                                        | 7.918                          | 3792.74            | 30030.63           | 13.577                         | 2640.05            | 35843.98           |
| A_68_P22509722 | chr3:127335595-127335641                          | NM_009718:-444           | Neurog2       | PROMOTER               | 1.715                                                        | 2.334                          | 539.14             | 1258.42            | 4.004                          | 417.61             | 1672.11            |
| A_68_P30353507 | chr15:77137504-77137548                           | NM_001110827:-43         | Rbfox2        | PROMOTER               | 1.715                                                        | 2.280                          | 405.10             | 923.60             | 3.911                          | 360.13             | 1408.46            |
| A_68_P21527966 | chr2:112105941-112105985                          | NM_133649:-508           | Slc12a6       | PROMOTER               | 1.715                                                        | 1.556                          | 781.59             | 1216.41            | 2.669                          | 608.90             | 1625.27            |
| A_68_P25261701 | chr7:86680448-86680492                            | ENSMUST00000141822:35468 |               | DOWNSTREAM             | 1.715                                                        | 3.255                          | 1707.77            | 5559.10            | 5.582                          | 1369.99            | 7646.90            |
| A_68_P20827009 | chr1:173200884-173200928                          | NM_020579:448            | B4galt3       | INSIDE                 | 1.714                                                        | 5.863                          | 2039.79            | 11958.50           | 10.047                         | 1518.05            | 15252.02           |
| A_68_P25009419 | chr7:26067406-26067450                            | NM_001110131:231         | Cic           | INSIDE                 | 1.714                                                        | 5.002                          | 3250.76            | 16259.68           | 8.575                          | 2867.73            | 24589.71           |
| A_68_P23254538 | chr4:120690017-120690061                          | NM_133716:-186           | Smap2         | PROMOTER               | 1.714                                                        | 4.098                          | 636.02             | 2606.32            | 7.024                          | 524.34             | 3683.03            |
| A_68_P23817348 | chr5:77086896-77086940                            | ENSMUST00000125922:173   |               | INSIDE                 | 1.714                                                        | 2.665                          | 1380.62            | 3679.33            | 4.568                          | 1126.22            | 5144.39            |
| A_68_P23644443 | chr5:43625072-43625116                            | NM_001177379:393         | Cpeb2         | INSIDE                 | 1.713                                                        | 5.653                          | 2539.23            | 14353.61           | 9.685                          | 1936.44            | 18754.98           |
| A_68_P29403726 | chr14:11994369-11994413                           | NM_010210:156            | Fhit          | INSIDE                 | 1.713                                                        | 3.069                          | 5639.46            | 17306.04           | 5.257                          | 4585.36            | 24106.61           |
| A_68_P32385145 | chrX:50341393-50341437                            | NM_013556:160            | Hprt          | INSIDE                 | 1.713                                                        | 5.394                          | 1232.71            | 6648.69            | 9.240                          | 713.22             | 6590.19            |
| A_68_P26764036 | chr9:99336932-99336976                            | NM_008624:177            | Mras          | INSIDE                 | 1.713                                                        | 3.924                          | 3458.26            | 13570.25           | 6.722                          | 2687.56            | 18066.21           |

| ProbeName      | Target position of probe on CpG island microarray | TargetID                | GeneSymbol    | CpG island Description | Ratio of relative methylation (TiO <sub>2</sub> -NP/Vehicle) | Sham group                     |                    |                    | TiO <sub>2</sub> -H group      |                    |                    |
|----------------|---------------------------------------------------|-------------------------|---------------|------------------------|--------------------------------------------------------------|--------------------------------|--------------------|--------------------|--------------------------------|--------------------|--------------------|
|                |                                                   |                         |               |                        |                                                              | Relative methylation (Cy5/Cy3) | Cy3 signal (Input) | Cy5 signal (MeDIP) | Relative methylation (Cy5/Cy3) | Cy3 signal (Input) | Cy5 signal (MeDIP) |
| A_68_P29001576 | chr13:45485361-45485405                           | NM_181043:57            | Myli1         | INSIDE                 | 1.713                                                        | 1.479                          | 1688.38            | 2496.84            | 2.533                          | 1298.46            | 3288.58            |
| A_68_P28039252 | chr11:95374960-95375004                           | NM_130858:897           | Nxph3         | INSIDE                 | 1.713                                                        | 3.388                          | 3144.62            | 10653.15           | 5.802                          | 2466.83            | 14312.08           |
| A_68_P23584119 | chr5:32761375-32761419                            | NM_172707:54            | Ppp1cb        | INSIDE                 | 1.713                                                        | 3.796                          | 5314.37            | 20175.38           | 6.503                          | 4182.75            | 27199.38           |
| A_68_P27926352 | chr11:75300162-75300206                           | NM_138659:-94           | Prpf8         | PROMOTER               | 1.713                                                        | 2.584                          | 2946.26            | 7613.67            | 4.425                          | 2454.06            | 10860.23           |
| A_68_P21902494 | chr2:179991894-179991938                          | NM_025587:-167          | Rps21         | PROMOTER               | 1.713                                                        | 9.493                          | 3506.19            | 33283.25           | 16.258                         | 2557.31            | 41577.61           |
| A_68_P26847329 | chr9:114887053-114887097                          | CCDS52952.1:4751        |               | DOWNSTREAM             | 1.713                                                        | 7.635                          | 2948.35            | 22510.50           | 13.079                         | 1995.00            | 26092.04           |
| A_68_P28706885 | chr12:106248338-106248382                         | NM_172500:-341          | 483142619Rik  | PROMOTER               | 1.712                                                        | 5.463                          | 6987.51            | 38171.76           | 9.353                          | 5071.87            | 47438.28           |
| A_68_P24127315 | chr5:138182692-138182736                          | NM_175521:-1488         | 6430598A04Rik | DIVERGENT_PROMOTER     | 1.712                                                        | 3.004                          | 1293.54            | 3886.35            | 5.143                          | 1008.95            | 5189.40            |
| A_68_P20268944 | chr1:60466493-60466537                            | NM_001198570:52         | Abi2          | INSIDE                 | 1.712                                                        | 4.100                          | 1797.03            | 7367.11            | 7.017                          | 1504.43            | 10555.97           |
| A_68_P31126791 | chr17:29375001-29375045                           | NM_153166:-287          | Cpne5         | PROMOTER               | 1.712                                                        | 2.642                          | 673.07             | 1778.26            | 4.523                          | 569.70             | 2576.69            |
| A_68_P26234161 | chr8:125074980-125075024                          | NM_001037298:227        | Fam38a        | INSIDE                 | 1.712                                                        | 3.407                          | 554.37             | 1888.59            | 5.832                          | 500.29             | 2917.83            |
| A_68_P21932363 | chr3:8462950-8462994                              | NR_033512:126           | Gm6194        | INSIDE                 | 1.712                                                        | 4.894                          | 2868.01            | 14035.36           | 8.377                          | 2247.66            | 18829.32           |
| A_68_P27537124 | chr10:127058798-127058842                         | NM_008512:-616          | Lrp1          | PROMOTER               | 1.712                                                        | 2.092                          | 4941.30            | 10335.66           | 3.581                          | 4217.40            | 15102.89           |
| A_68_P30447388 | chr15:93349565-93349609                           | NM_001033217:76736      | Prickle1      | INSIDE                 | 1.712                                                        | 1.704                          | 1895.94            | 3231.44            | 2.918                          | 1539.71            | 4493.14            |
| A_68_P31107655 | chr17:26122056-26122100                           | NM_153140:36727         | Rab11fip3     | DOWNSTREAM             | 1.712                                                        | 6.619                          | 986.65             | 6530.67            | 11.332                         | 855.11             | 9690.13            |
| A_68_P22315261 | chr3:88520728-88520772                            | NM_001163310:-25        | Rit1          | PROMOTER               | 1.712                                                        | 4.393                          | 2291.16            | 10065.31           | 7.521                          | 1002.82            | 13558.61           |
| A_68_P28277266 | chr12:19710348-19710392                           | BC012645:386747         |               | INSIDE                 | 1.712                                                        | 5.328                          | 2009.26            | 10704.84           | 9.122                          | 1558.95            | 14220.18           |
| A_68_P23678475 | chr5:49916199-49916243                            | ENSMUST00000087395:-280 |               | PROMOTER               | 1.712                                                        | 1.441                          | 1179.39            | 1699.97            | 2.468                          | 1102.21            | 2719.84            |
| A_68_P26867372 | chr9:118515925-118515969                          | NM_133721:120           | Igfa9         | INSIDE                 | 1.711                                                        | 3.220                          | 367.80             | 1184.40            | 5.510                          | 296.16             | 1631.77            |
| A_68_P21322072 | chr2:71711713-71711757                            | NM_172665:406           | Pdk1          | INSIDE                 | 1.711                                                        | 2.500                          | 555.31             | 1388.44            | 4.279                          | 440.50             | 1884.90            |
| A_68_P21836025 | chr2:167363730-167363774                          | NM_011427:26            | Snai1         | INSIDE                 | 1.711                                                        | 1.602                          | 1591.40            | 2549.53            | 2.740                          | 1316.52            | 3607.71            |
| A_68_P29672987 | chr14:65977066-65977114                           | NM_199029:-422          | Zfp395        | PROMOTER               | 1.711                                                        | 3.926                          | 498.77             | 1958.26            | 6.719                          | 434.67             | 2920.36            |
| A_68_P24954136 | chr7:6083754-6083798                              | NM_001013012:23797      | Zfp787        | INSIDE                 | 1.711                                                        | 3.719                          | 1970.48            | 7328.70            | 6.364                          | 1617.93            | 10296.73           |
| A_68_P24864304 | chr6:134878874-134878918                          | NR_037955:-213          | 119000215Rik  | PROMOTER               | 1.710                                                        | 3.687                          | 1160.62            | 4279.02            | 6.305                          | 851.08             | 5366.07            |
| A_68_P23753715 | chr5:65361156-65361200                            | NM_026667:-135          | Fam114a1      | DIVERGENT_PROMOTER     | 1.710                                                        | 4.115                          | 2530.52            | 10412.20           | 7.037                          | 2134.05            | 15016.51           |
| A_68_P25096865 | chr7:53356200-53356244                            | NM_001204411:-88        | Kenj11        | PROMOTER               | 1.710                                                        | 7.334                          | 10124.04           | 74246.41           | 12.539                         | 6198.09            | 77718.21           |
| A_68_P30397291 | chr15:84684245-84684289                           | NM_001081166:2293       | Phf21b        | INSIDE                 | 1.710                                                        | 4.195                          | 3058.48            | 12831.61           | 7.173                          | 2343.68            | 16811.35           |
| A_68_P23531274 | chr5:21850512-21850556                            | NM_011261:-11           | Reln          | PROMOTER               | 1.710                                                        | 5.008                          | 3601.55            | 18035.54           | 8.563                          | 3038.50            | 26017.57           |
| A_68_P25102011 | chr7:54175094-54175138                            | NM_021884:184           | Tsg101        | INSIDE                 | 1.710                                                        | 3.474                          | 1126.98            | 3915.36            | 5.942                          | 917.98             | 5454.39            |
| A_68_P23317755 | chr4:133024124-133024168                          |                         |               | Unknown                | 1.710                                                        | 2.913                          | 1711.16            | 4983.75            | 4.982                          | 1437.64            | 7161.96            |
| A_68_P31157497 | chr17:35226598-35226642                           | NM_178592:385           | Abhd16a       | INSIDE                 | 1.709                                                        | 2.371                          | 2002.65            | 4748.68            | 4.052                          | 1436.97            | 5822.04            |
| A_68_P22415887 | chr3:108830521-108830565                          | NM_001163567:-17        | Fam102b       | PROMOTER               | 1.709                                                        | 30.067                         | 421.02             | 12658.99           | 51.391                         | 305.92             | 15721.46           |
| A_68_P21078285 | chr2:26236006-26236050                            | NM_172339:145           | Snapc4        | INSIDE                 | 1.709                                                        | 3.792                          | 4307.71            | 16333.25           | 6.478                          | 3441.90            | 22297.41           |
| A_68_P28974164 | chr13:40824040-40824084                           | NM_001122948:1750       | Tefap2a       | INSIDE                 | 1.709                                                        | 4.053                          | 3801.80            | 15408.83           | 6.928                          | 3002.30            | 20798.76           |
| A_68_P21741665 | chr2:150730549-150730593                          | NM_024465:-103          | Abhd12        | DIVERGENT_PROMOTER     | 1.708                                                        | 3.632                          | 2876.84            | 10449.71           | 6.204                          | 2289.56            | 14203.41           |
| A_68_P29619756 | chr14:56381232-56381276                           | NM_020490:990           | Ltb4r2        | INSIDE                 | 1.708                                                        | 1.671                          | 743.80             | 1242.88            | 2.855                          | 716.65             | 2045.84            |
| A_68_P26079854 | chr8:97381360-97381404                            | NM_009090:33            | Poir2c        | INSIDE                 | 1.708                                                        | 8.059                          | 1623.42            | 13082.40           | 13.768                         | 1177.99            | 16217.94           |
| A_68_P23317106 | chr4:132895104-132895148                          | NM_199306:104           | Wdte1         | INSIDE                 | 1.708                                                        | 4.498                          | 11435.70           | 51436.61           | 7.681                          | 8078.16            | 62051.66           |
| A_68_P21419479 | chr2:90729985-90730029                            | NM_026161:4064          | C1qtnf4       | INSIDE                 | 1.707                                                        | 11.448                         | 561.15             | 6424.04            | 19.545                         | 476.10             | 9305.58            |
| A_68_P24864235 | chr6:134870715-134870759                          | NM_009875:318           | Cdkn1b        | INSIDE                 | 1.707                                                        | 1.405                          | 1767.54            | 2483.14            | 2.397                          | 1419.21            | 3402.40            |
| A_68_P27173119 | chr10:59681994-59682038                           | NM_016803:-8            | Chst3         | PROMOTER               | 1.707                                                        | 1.891                          | 3067.53            | 5801.21            | 3.228                          | 2489.26            | 8036.45            |
| A_68_P23280751 | chr4:126234084-126234128                          | NM_175554:-117          | Clsn1         | PROMOTER               | 1.707                                                        | 5.348                          | 1230.34            | 6580.06            | 9.127                          | 1117.06            | 10195.26           |
| A_68_P30672037 | chr16:35769289-35769333                           | NM_153550:132           | Dire2         | INSIDE                 | 1.707                                                        | 3.802                          | 1819.91            | 6918.94            | 6.491                          | 1445.82            | 9384.94            |
| A_68_P22271218 | chr3:80717646-80717690                            | NM_010298:-122          | Glr3          | PROMOTER               | 1.707                                                        | 3.883                          | 2691.97            | 10453.05           | 6.627                          | 2172.05            | 14394.29           |
| A_68_P25023658 | chr7:29594290-29594344                            | NM_177301:-1592         | Hnrnp1        | PROMOTER               | 1.707                                                        | 4.797                          | 1710.77            | 8206.30            | 8.186                          | 1221.68            | 10000.86           |
| A_68_P24171753 | chr5:147888406-147888450                          | NM_080795:-280          | Lnx2          | DIVERGENT_PROMOTER     | 1.707                                                        | 3.199                          | 8652.25            | 27677.32           | 5.461                          | 6559.61            | 35820.20           |
| A_68_P23609096 | A_68_P23609096                                    |                         |               | Unknown                | 1.707                                                        | 2.868                          | 253.04             | 725.71             | 4.895                          | 223.66             | 1094.77            |
| A_68_P31376853 | chr17:79753911-79753955                           | NM_026514:499           | Cdc42ep3      | INSIDE                 | 1.706                                                        | 1.929                          | 1057.53            | 2040.31            | 3.292                          | 870.61             | 2866.13            |
| A_68_P24980375 | chr7:16807208-16807254                            | NM_027883:151           | Dhx34         | INSIDE                 | 1.706                                                        | 2.067                          | 963.48             | 1991.87            | 3.527                          | 747.64             | 2637.04            |
| A_68_P27551374 | chr11:3232269-3232313                             | NM_178149:1557          | Pik3ip1       | INSIDE                 | 1.706                                                        | 2.224                          | 832.12             | 1850.51            | 3.793                          | 649.12             | 2462.26            |
| A_68_P27968802 | chr11:82684465-82684509                           | NM_001164570:-240       | Rfl1          | PROMOTER               | 1.706                                                        | 5.404                          | 105512.20          | 570240.10          | 9.220                          | 70913.33           | 653851.00          |



| ProbeName      | Target position of probe on CpG island microarray | TargetID            | GeneSymbol    | CpG island Description | Ratio of relative methylation (TiO <sub>2</sub> -NP/Vehicle) | Sham group                     |                    |                    | TiO <sub>2</sub> -H group      |                    |                    |
|----------------|---------------------------------------------------|---------------------|---------------|------------------------|--------------------------------------------------------------|--------------------------------|--------------------|--------------------|--------------------------------|--------------------|--------------------|
|                |                                                   |                     |               |                        |                                                              | Relative methylation (Cy5/Cy3) | Cy3 signal (Input) | Cy5 signal (MeDIP) | Relative methylation (Cy5/Cy3) | Cy3 signal (Input) | Cy5 signal (MeDIP) |
| A_68_P31655789 | chr18:42671379-42671423                           | NM_001039474:260    | Tcerg1        | INSIDE                 | 1.706                                                        | 7.326                          | 13803.96           | 101132.70          | 12.500                         | 9150.65            | 114384.80          |
| A_68_P30476395 | chr15:98606917-98606961                           | NM_0111718:1643     | Wnt10b        | INSIDE                 | 1.706                                                        | 9.467                          | 3105.78            | 29401.01           | 16.152                         | 2449.64            | 39567.60           |
| A_68_P23189066 | chr4:106851077-106851121                          | NM_025617:-127      | 2210012G02Rik | DIVERGENT_PROMOTER     | 1.705                                                        | 3.272                          | 1742.72            | 5701.96            | 5.579                          | 1469.17            | 8196.62            |
| A_68_P24158559 | chr5:144670369-144670413                          | NM_001172146:318    | Aimp2         | INSIDE                 | 1.705                                                        | 4.816                          | 2415.13            | 11630.91           | 8.213                          | 2055.23            | 16879.15           |
| A_68_P23612479 | chr5:37633037-37633081                            | NM_001136058:-260   | Crmp1         | PROMOTER               | 1.705                                                        | 4.128                          | 1558.86            | 6434.45            | 7.038                          | 1230.62            | 8661.63            |
| A_68_P28185591 | chr11:120470102-120470146                         | NM_153288:334       | Npb           | INSIDE                 | 1.705                                                        | 2.681                          | 3291.21            | 8822.68            | 4.571                          | 2345.49            | 10720.74           |
| A_68_P25091297 | chr7:52384491-52384535                            | NM_009438:-407      | Rpl13a        | PROMOTER               | 1.705                                                        | 6.002                          | 1607.98            | 9650.27            | 10.230                         | 1214.67            | 12426.62           |
| A_68_P29455867 | chr14:22804205-22804249                           | NM_145459:4597      | Zfp503        | INSIDE                 | 1.705                                                        | 2.108                          | 6999.60            | 14757.56           | 3.594                          | 5362.43            | 19273.32           |
| A_68_P27835628 | chr11:59041341-59041385                           | NM_001130408:302    | Arf1          | INSIDE                 | 1.704                                                        | 4.375                          | 592.46             | 2591.78            | 7.456                          | 507.66             | 3785.08            |
| A_68_P20834309 | chr1:174562662-174562706                          | NM_026725:421       | Dusp23        | INSIDE                 | 1.704                                                        | 4.278                          | 19244.57           | 82328.57           | 7.290                          | 13306.05           | 97004.34           |
| A_68_P21826983 | chr2:165818573-165818617                          | NM_008679:458       | Ncoa3         | INSIDE                 | 1.704                                                        | 7.206                          | 5906.37            | 42563.88           | 12.282                         | 4278.32            | 52547.31           |
| A_68_P27898381 | chr11:69809079-69809123                           | NM_030064:-172      | Phf23         | PROMOTER               | 1.704                                                        | 1.792                          | 4096.91            | 7341.58            | 3.054                          | 2920.50            | 8919.54            |
| A_68_P22388656 | chr3:103718191-103718235                          | NM_172684:170       | Rsbm1         | INSIDE                 | 1.704                                                        | 3.997                          | 845.40             | 3378.85            | 6.812                          | 691.87             | 4712.77            |
| A_68_P30489270 | chr15:100877044-100877088                         | NM_011323:110365    | Scn8a         | DOWNSTREAM             | 1.704                                                        | 1.428                          | 2703.94            | 3861.00            | 2.433                          | 2254.44            | 5485.81            |
| A_68_P23447092 | chr5:3802834-3802878                              | NM_001003909:253    | Ankib1        | INSIDE                 | 1.703                                                        | 3.584                          | 749.53             | 2686.40            | 6.105                          | 672.66             | 4106.67            |
| A_68_P24423143 | chr6:47403815-47403859                            | NM_012042:-486      | Cul1          | PROMOTER               | 1.703                                                        | 5.922                          | 1174.27            | 6954.62            | 10.083                         | 914.15             | 9217.76            |
| A_68_P21489528 | chr2:104334070-104334114                          | NM_001145824:554    | Hipk3         | INSIDE                 | 1.703                                                        | 1.668                          | 1201.67            | 2004.36            | 2.840                          | 1086.32            | 3085.18            |
| A_68_P30127809 | chr15:34236397-34236441                           | NM_016762:-17       | Matn2         | PROMOTER               | 1.703                                                        | 2.565                          | 3731.02            | 9571.39            | 4.369                          | 2799.86            | 12232.50           |
| A_68_P31120336 | chr17:28217206-28217250                           | NM_013687:301       | Top11         | INSIDE                 | 1.703                                                        | 8.975                          | 36936.59           | 331494.10          | 15.286                         | 22975.57           | 351212.70          |
| A_68_P25360010 | chr7:106289656-106289700                          | NM_178635:-24       | Uvr9g         | PROMOTER               | 1.703                                                        | 2.507                          | 1624.33            | 4071.82            | 4.270                          | 1259.73            | 5378.94            |
| A_68_P27338392 | chr10:90291975-90292019                           | NM_001177396:252561 | Anks1b        | INSIDE                 | 1.702                                                        | 6.325                          | 1696.69            | 10730.82           | 10.766                         | 1448.83            | 15598.30           |
| A_68_P26014555 | chr8:85856129-85856173                            | NM_001170691:235    | Elmod2        | INSIDE                 | 1.702                                                        | 4.294                          | 2829.27            | 12149.53           | 7.307                          | 2308.53            | 16868.67           |
| A_68_P21257003 | chr2:60047554-60047598                            | NM_020575:-416      | March7        | PROMOTER               | 1.702                                                        | 2.127                          | 1773.27            | 3772.14            | 3.621                          | 1423.23            | 5153.13            |
| A_68_P27794924 | chr11:51433455-51433500                           | NM_026631:203       | Nhp2          | INSIDE                 | 1.702                                                        | 3.715                          | 4250.56            | 15790.13           | 6.324                          | 3209.74            | 20297.16           |
| A_68_P28873011 | chr13:21560407-21560451                           | NM_025719:-58       | Nkap1         | PROMOTER               | 1.702                                                        | 5.623                          | 2171.94            | 12211.78           | 9.572                          | 1787.51            | 17109.48           |
| A_68_P25029775 | chr7:30857776-30857820                            | NM_177889:44        | Zfp82         | INSIDE                 | 1.702                                                        | 2.524                          | 1477.15            | 3728.99            | 4.296                          | 1209.50            | 5196.36            |
| A_68_P32846303 | chr1:78485277-78485321                            | NM_011811:123       | Farsb         | INSIDE                 | 1.701                                                        | 2.498                          | 580.73             | 1450.60            | 4.249                          | 463.22             | 1968.35            |
| A_68_P30849196 | chr16:70314241-70314285                           | NM_028803:-69       | Gbe1          | PROMOTER               | 1.701                                                        | 2.303                          | 2485.26            | 5724.21            | 3.918                          | 1985.75            | 7780.62            |
| A_68_P22081218 | chr3:40549756-40549800                            | NM_011020:244       | Hspa41        | INSIDE                 | 1.701                                                        | 3.647                          | 627.09             | 2287.30            | 6.203                          | 700.15             | 4342.90            |
| A_68_P26065137 | chr8:94881817-94881861                            | NM_018826:144       | Irx5          | INSIDE                 | 1.701                                                        | 3.067                          | 1410.84            | 4326.52            | 5.216                          | 1114.31            | 5812.43            |
| A_68_P29453037 | chr14:22320470-22320514                           | NM_017479:1486      | Myst4         | INSIDE                 | 1.701                                                        | 8.500                          | 7052.63            | 59950.60           | 14.457                         | 5362.66            | 77527.39           |
| A_68_P28137828 | chr11:112643707-112643751                         | NM_011448:205       | Sox9          | INSIDE                 | 1.701                                                        | 3.547                          | 3362.01            | 11926.44           | 6.035                          | 2633.99            | 15895.53           |
| A_68_P22931104 | chr4:54958261-54958305                            | NM_172867:-2534     | Zfp462        | PROMOTER               | 1.701                                                        | 2.761                          | 1914.64            | 5286.90            | 4.698                          | 1621.76            | 7619.02            |
| A_68_P28081267 | chr11:102623133-102623177                         | NM_001110778:402    | Adam11        | INSIDE                 | 1.700                                                        | 2.010                          | 597.97             | 1201.94            | 3.417                          | 526.77             | 1799.90            |
| A_68_P25047313 | chr7:35841354-35841398                            | NM_009884:209       | Cebpg         | INSIDE                 | 1.700                                                        | 1.809                          | 3138.06            | 5676.12            | 3.075                          | 2564.46            | 7886.72            |
| A_68_P23523151 | chr5:20387300-20387344                            | NM_172992:620       | Phf2          | INSIDE                 | 1.700                                                        | 2.310                          | 1113.80            | 2573.14            | 3.927                          | 1022.76            | 4015.91            |
| A_68_P28061204 | chr11:99091669-99091713                           | NM_020618:641       | Smarca1       | INSIDE                 | 1.700                                                        | 1.808                          | 1456.70            | 2633.66            | 3.073                          | 1302.10            | 4000.92            |
| A_68_P22752472 | chr4:15872547-15872591                            | NM_026172:86        | Deer1         | INSIDE                 | 1.699                                                        | 5.267                          | 2508.55            | 13212.65           | 8.947                          | 2094.87            | 18743.45           |
| A_68_P24218861 | chr6:6829299-6829343                              | NM_010056:2748      | Dlx5          | INSIDE                 | 1.699                                                        | 2.436                          | 1752.76            | 4269.76            | 4.138                          | 1353.69            | 5601.47            |
| A_68_P27697249 | chr11:33743483-33743527                           | NM_001190885:81     | Kenip1        | INSIDE                 | 1.699                                                        | 5.080                          | 5765.99            | 29288.62           | 8.631                          | 4620.64            | 39880.89           |
| A_68_P27449326 | chr10:110943860-110943904                         | NM_009344:541       | Phlda1        | INSIDE                 | 1.699                                                        | 4.686                          | 709.78             | 3326.28            | 7.963                          | 558.04             | 4443.61            |
| A_68_P31934221 | chr19:6363781-6363825                             | NM_001110791:113    | Sf1           | INSIDE                 | 1.699                                                        | 2.366                          | 508.77             | 1203.74            | 4.020                          | 393.59             | 1582.14            |
| A_68_P25588514 | chr7:148577796-148577840                          | NM_011528:-240      | Taldo1        | PROMOTER               | 1.699                                                        | 1.899                          | 1080.94            | 2052.65            | 3.227                          | 874.05             | 2820.31            |
| A_68_P20457301 | chr1:95651221-95651265                            | NM_025920:173       | Thap4         | INSIDE                 | 1.699                                                        | 10.560                         | 1017.56            | 10745.42           | 17.936                         | 928.45             | 16652.85           |
| A_68_P21826276 | chr2:165671382-165671427                          | NM_027230:38784     | Zmynd8        | INSIDE                 | 1.699                                                        | 7.060                          | 678.38             | 4789.61            | 11.993                         | 547.10             | 6561.33            |
| A_68_P32364063 | chrX:45698568-45698612                            | NM_178782:4056      | Bcor1         | INSIDE                 | 1.698                                                        | 3.139                          | 2990.20            | 9385.67            | 5.330                          | 1496.39            | 7975.42            |
| A_68_P25954148 | chr8:73321826-73321870                            | NM_199308:-5516     | Mast3         | PROMOTER               | 1.698                                                        | 3.752                          | 5167.04            | 19388.07           | 6.371                          | 3777.88            | 24067.35           |
| A_68_P32227000 | chr19:60832730-60832774                           | NM_178421:863       | Nanos1        | INSIDE                 | 1.698                                                        | 1.374                          | 2438.63            | 3350.63            | 2.333                          | 1862.02            | 4344.11            |
| A_68_P32766772 | chrX:153930279-153930323                          | NM_009214:-322      | Sms           | PROMOTER               | 1.698                                                        | 4.058                          | 1323.76            | 5372.22            | 6.890                          | 777.52             | 5357.23            |
| A_68_P32552603 | chrX:96133526-96133570                            | NM_207633:429       | Yipf6         | INSIDE                 | 1.698                                                        | 2.647                          | 821.91             | 2175.68            | 4.496                          | 459.10             | 2064.03            |
| A_68_P25657178 | chr8:11728695-11728739                            | NM_001113517:612    | Arhgef7       | INSIDE                 | 1.697                                                        | 4.997                          | 1742.71            | 8709.00            | 8.478                          | 1385.60            | 11747.66           |

| ProbeName      | Target position of probe on CpG island microarray | TargetID           | GeneSymbol    | CpG island Description | Ratio of relative methylation (TiO <sub>2</sub> -NP/Vehicle) | Sham group                     |                    |                    | TiO <sub>2</sub> -H group      |                    |                    |
|----------------|---------------------------------------------------|--------------------|---------------|------------------------|--------------------------------------------------------------|--------------------------------|--------------------|--------------------|--------------------------------|--------------------|--------------------|
|                |                                                   |                    |               |                        |                                                              | Relative methylation (Cy5/Cy3) | Cy3 signal (Input) | Cy5 signal (MeDIP) | Relative methylation (Cy5/Cy3) | Cy3 signal (Input) | Cy5 signal (MeDIP) |
| A_68_P21516743 | chr2:109533914-109533958                          | NM_001048142:217   | Bdnf          | INSIDE                 | 1.697                                                        | 3.450                          | 2201.21            | 7593.39            | 5.853                          | 1533.04            | 8973.33            |
| A_68_P30363892 | chr15:78858298-78858342                           | NM_008197:-321     | H1f0          | PROMOTER               | 1.697                                                        | 1.440                          | 972.76             | 1400.49            | 2.443                          | 844.95             | 2064.48            |
| A_68_P21417961 | chr2:90420785-90420829                            | NM_008982:-2       | Ptprij        | PROMOTER               | 1.697                                                        | 5.256                          | 745.42             | 3917.71            | 8.919                          | 603.84             | 5385.76            |
| A_68_P23405733 | chr4:149745839-149745883                          | NM_001085492:89836 | Rere          | INSIDE                 | 1.697                                                        | 2.122                          | 4707.06            | 9988.62            | 3.601                          | 3562.93            | 12828.77           |
| A_68_P24452215 | chr6:52664021-52664065                            | NM_025816:320      | Tax1bp1       | INSIDE                 | 1.697                                                        | 6.629                          | 2894.54            | 19187.84           | 11.248                         | 2434.57            | 27383.92           |
| A_68_P23591177 | chr5:34124884-34124928                            | NM_019694:447      | Letm1         | INSIDE                 | 1.696                                                        | 3.111                          | 1436.53            | 4468.72            | 5.276                          | 1267.90            | 6689.45            |
| A_68_P31926196 | chr19:4989991-4990035                             | NM_153553:-41      | Npas4         | PROMOTER               | 1.696                                                        | 2.125                          | 311.58             | 662.19             | 3.605                          | 264.17             | 952.35             |
| A_68_P23617871 | chr5:38550739-38550783                            | NM_010942:-54      | Nsg1          | PROMOTER               | 1.696                                                        | 3.491                          | 4284.39            | 14957.57           | 5.920                          | 3403.27            | 20146.35           |
| A_68_P21130445 | chr2:34769374-34769418                            | NM_028716:100      | Phf19         | INSIDE                 | 1.696                                                        | 2.328                          | 393.02             | 914.86             | 3.947                          | 279.14             | 1101.68            |
| A_68_P30366260 | chr15:79233510-79233554                           | NM_172608:201      | Tmem184b      | INSIDE                 | 1.696                                                        | 2.289                          | 1282.09            | 2934.90            | 3.882                          | 1107.15            | 4297.46            |
| A_68_P21105309 | chr2:30657215-30657259                            | NM_198000:-9       | 1700001O22Rik | PROMOTER               | 1.695                                                        | 3.081                          | 983.14             | 3028.58            | 5.223                          | 817.28             | 4268.44            |
| A_68_P20153982 | chr1:37486790-37486834                            | NM_198006:136      | 6330578E17Rik | INSIDE                 | 1.695                                                        | 2.028                          | 3468.44            | 7034.36            | 3.437                          | 2727.80            | 9375.07            |
| A_68_P31950789 | chr19:10531506-10531550                           | NM_001111140:409   | Lrrc10b       | INSIDE                 | 1.695                                                        | 1.584                          | 591.01             | 936.18             | 2.684                          | 514.45             | 1380.87            |
| A_68_P21777851 | chr2:157386103-157386147                          | NM_010923:279      | Nnat          | INSIDE                 | 1.695                                                        | 4.656                          | 5260.47            | 24494.02           | 7.893                          | 3548.90            | 28010.42           |
| A_68_P23696525 | chr5:53132855-53132899                            | NM_025951:64       | Pi4k2b        | INSIDE                 | 1.695                                                        | 5.578                          | 1428.36            | 7967.54            | 9.456                          | 1312.72            | 12413.29           |
| A_68_P30589177 | chr16:20718065-20718109                           | NM_145632:188      | Polt2h        | INSIDE                 | 1.695                                                        | 2.321                          | 1698.55            | 3942.10            | 3.934                          | 1393.67            | 5482.07            |
| A_68_P23321241 | chr4:133684793-133684837                          | NM_080559:-146     | Sh3bgrl3      | PROMOTER               | 1.695                                                        | 3.600                          | 2045.37            | 7362.38            | 6.101                          | 1544.79            | 9425.19            |
| A_68_P24118628 | chr5:136410394-136410438                          | NM_018871:95       | Ywhag         | INSIDE                 | 1.695                                                        | 1.624                          | 1284.33            | 2086.11            | 2.752                          | 987.55             | 2718.20            |
| A_68_P24513202 | chr6:65621890-65621934                            | NM_172399:308      | A930038C07Rik | INSIDE                 | 1.694                                                        | 3.364                          | 496.39             | 1669.62            | 5.697                          | 464.53             | 2646.23            |
| A_68_P28731662 | chr12:110290760-110290805                         | NM_001163175:15645 | Begain        | INSIDE                 | 1.694                                                        | 2.853                          | 1011.07            | 2884.77            | 4.833                          | 847.23             | 4094.86            |
| A_68_P27278225 | chr10:79144473-79144517                           | NM_177613:-445     | Cdc34         | PROMOTER               | 1.694                                                        | 2.650                          | 4981.62            | 13200.69           | 4.488                          | 3951.36            | 17732.59           |
| A_68_P28457807 | chr12:57713035-57713080                           | NM_008701:1214     | Nkx2-9        | INSIDE                 | 1.694                                                        | 3.538                          | 580.12             | 2052.72            | 5.995                          | 556.78             | 3338.12            |
| A_68_P24066931 | chr5:125922400-125922444                          | NM_029752:485      | Bri3bp        | INSIDE                 | 1.693                                                        | 1.474                          | 678.49             | 1000.22            | 2.495                          | 592.40             | 1478.08            |
| A_68_P23892217 | chr5:92512328-92512372                            | NM_001080797:-407  | G3bp2         | PROMOTER               | 1.693                                                        | 3.722                          | 2491.50            | 9273.63            | 6.300                          | 1946.07            | 12259.70           |
| A_68_P21834182 | chr2:167015184-167015228                          | NM_008420:-907     | Kcnb1         | PROMOTER               | 1.693                                                        | 5.632                          | 3446.00            | 19408.40           | 9.534                          | 2638.55            | 25156.65           |
| A_68_P30292506 | chr15:66409382-66409426                           | NM_001081409:271   | Phf2011       | INSIDE                 | 1.693                                                        | 2.130                          | 765.44             | 1630.54            | 3.606                          | 674.77             | 2432.95            |
| A_68_P31087861 | chr17:22058135-22058179                           | NM_001199048:41275 | Zfp942        | DOWNSTREAM             | 1.693                                                        | 6.043                          | 8521.82            | 51496.41           | 10.228                         | 6647.56            | 67992.19           |
| A_68_P28513315 | chr12:70299066-70299110                           | NM_027269:328      | 1110034A24Rik | INSIDE                 | 1.692                                                        | 2.946                          | 4125.79            | 12154.63           | 4.984                          | 17617.39           | 17617.39           |
| A_68_P30338802 | chr15:74503171-74503215                           | NM_018790:-192     | Arc           | PROMOTER               | 1.692                                                        | 3.131                          | 5011.73            | 15690.22           | 5.298                          | 3499.47            | 18539.99           |
| A_68_P29040998 | chr13:53024981-53025025                           | NM_016709:44       | Auh           | INSIDE                 | 1.692                                                        | 3.051                          | 17814.71           | 54352.38           | 5.163                          | 14317.06           | 73919.36           |
| A_68_P28059222 | chr11:98768831-98768880                           | NM_001025779:-347  | Cdc6          | PROMOTER               | 1.692                                                        | 7.625                          | 1315.70            | 10031.63           | 12.899                         | 995.61             | 12841.84           |
| A_68_P28153287 | chr11:115264936-115264980                         | NM_026729:-121     | Ict1          | PROMOTER               | 1.692                                                        | 2.679                          | 1149.83            | 3080.74            | 4.535                          | 929.72             | 4216.00            |
| A_68_P23394435 | chr4:147822699-147822743                          | NM_020009:30       | Mtor          | INSIDE                 | 1.692                                                        | 5.778                          | 2393.80            | 13830.38           | 9.777                          | 1997.31            | 19527.03           |
| A_68_P30018904 | chr15:11836154-11836198                           | NM_001039181:-747  | Npr3          | PROMOTER               | 1.692                                                        | 2.096                          | 1637.38            | 3432.46            | 3.547                          | 1416.00            | 5023.16            |
| A_68_P26165552 | chr8:113443992-113444036                          | NM_009179:250      | St3gal2       | INSIDE                 | 1.692                                                        | 4.347                          | 2103.08            | 9142.78            | 7.357                          | 1692.26            | 12450.05           |
| A_68_P28595535 | chr12:85292140-85292184                           | NM_023633:605      | 2410016O06Rik | INSIDE                 | 1.691                                                        | 3.618                          | 1248.07            | 4515.38            | 6.118                          | 1021.70            | 6251.02            |
| A_68_P24371747 | chr6:37249971-37250015                            | NM_001081206:-16   | Dgki          | PROMOTER               | 1.691                                                        | 3.057                          | 2279.23            | 6968.62            | 5.169                          | 1966.19            | 10162.98           |
| A_68_P31253727 | chr17:56219020-56219064                           | NM_008233:-37      | Hdgpfp2       | DIVERGENT_PROMOTER     | 1.691                                                        | 2.480                          | 1095.39            | 2716.84            | 4.194                          | 842.04             | 3531.18            |
| A_68_P25088095 | chr7:51804301-51804346                            | NM_011131:-138     | Pold1         | PROMOTER               | 1.691                                                        | 2.746                          | 3343.13            | 9180.62            | 4.645                          | 2543.73            | 11815.50           |
| A_68_P28768143 | chr12:11772447-117724491                          | NM_011215:276      | Ptpn22        | INSIDE                 | 1.691                                                        | 7.523                          | 3494.12            | 26285.46           | 12.721                         | 2807.79            | 35716.92           |
| A_68_P27542729 | chr10:128133023-128133067                         | NM_177411:280      | Rab5b         | INSIDE                 | 1.691                                                        | 2.472                          | 2685.10            | 6638.46            | 4.180                          | 2268.41            | 9481.84            |
| A_68_P23407530 | chr4:150026271-150026315                          | NM_173774:-9       | Sle45a1       | PROMOTER               | 1.691                                                        | 6.326                          | 669.12             | 4233.06            | 10.699                         | 664.88             | 7113.70            |
| A_68_P24759109 | chr6:113327446-113327490                          | NM_133932:46       | Tada3         | INSIDE                 | 1.691                                                        | 3.894                          | 1254.60            | 4885.71            | 6.584                          | 1005.79            | 6621.83            |
| A_68_P25798746 | chr8:40068990-40069034                            | NM_030254:92       | Tusc3         | INSIDE                 | 1.691                                                        | 3.748                          | 1215.15            | 4554.28            | 6.337                          | 912.00             | 5779.74            |
| A_68_P25589538 | chr7:148725824-148725868                          | NM_001142681:-90   | Chid1         | PROMOTER               | 1.690                                                        | 2.157                          | 1913.62            | 4128.24            | 3.645                          | 1568.84            | 5718.28            |
| A_68_P23976347 | chr5:109986035-109986079                          | NM_001164735:1956  | Crlf2         | INSIDE                 | 1.690                                                        | 6.297                          | 6501.58            | 40937.80           | 10.638                         | 4205.31            | 44737.50           |
| A_68_P23590170 | chr5:33972447-33972492                            | NM_178390:-185     | Fam53a        | PROMOTER               | 1.690                                                        | 4.543                          | 10365.60           | 47091.67           | 7.678                          | 7189.64            | 55203.47           |
| A_68_P30497696 | chr15:102236237-102236289                         | NM_013672:-484     | Sp1           | PROMOTER               | 1.690                                                        | 2.365                          | 620.64             | 1467.90            | 3.996                          | 432.04             | 1726.52            |
| A_68_P20162793 | chr1:38954859-38954904                            | NM_145142:124      | Chst10        | INSIDE                 | 1.689                                                        | 7.615                          | 3082.84            | 23475.55           | 12.859                         | 2404.60            | 30921.32           |
| A_68_P29055348 | chr13:55589381-55589425                           | NM_001177371:35    | Dbn1          | INSIDE                 | 1.689                                                        | 2.635                          | 18468.36           | 48663.72           | 4.451                          | 14895.89           | 66305.82           |
| A_68_P21107218 | chr2:30997212-30997256                            | NM_001038700:294   | Fnbp1         | INSIDE                 | 1.689                                                        | 2.193                          | 906.60             | 1988.37            | 3.704                          | 750.28             | 2778.80            |

| ProbeName      | Target position of probe on CpG island microarray | TargetID                | GeneSymbol    | CpG island Description | Ratio of relative methylation (TiO <sub>2</sub> -NP/Vehicle) | Sham group                     |                    |                    | TiO <sub>2</sub> -H group      |                    |                    |
|----------------|---------------------------------------------------|-------------------------|---------------|------------------------|--------------------------------------------------------------|--------------------------------|--------------------|--------------------|--------------------------------|--------------------|--------------------|
|                |                                                   |                         |               |                        |                                                              | Relative methylation (Cy5/Cy3) | Cy3 signal (Input) | Cy5 signal (MeDIP) | Relative methylation (Cy5/Cy3) | Cy3 signal (Input) | Cy5 signal (MeDIP) |
| A_68_P26077217 | chr8:96910495-96910539                            | NM_022331:117           | Herpud1       | INSIDE                 | 1.689                                                        | 5.907                          | 2741.31            | 16193.24           | 9.979                          | 2088.27            | 20837.91           |
| A_68_P29604760 | chr14:52723420-52723464                           | NM_001170981:261        | Hnrnp2        | INSIDE                 | 1.689                                                        | 2.918                          | 2786.63            | 8130.06            | 4.928                          | 2129.02            | 10490.78           |
| A_68_P26258415 | chr8:129116306-129116350                          | NM_001164598:1008       | Irf2bp2       | INSIDE                 | 1.689                                                        | 2.066                          | 5891.25            | 12169.15           | 3.488                          | 4892.94            | 17068.30           |
| A_68_P28049252 | chr11:97049849-97049893                           | NM_008379:-664          | Kpnb1         | PROMOTER               | 1.689                                                        | 2.834                          | 861.80             | 2442.52            | 4.787                          | 836.84             | 4005.87            |
| A_68_P24027251 | chr5:119010546-119010590                          | NM_172424:-159          | Med131        | PROMOTER               | 1.689                                                        | 4.857                          | 1353.13            | 6571.65            | 8.204                          | 1178.58            | 9668.76            |
| A_68_P27841048 | chr11:59954437-59954481                           | NM_001037764:875        | Rai1          | INSIDE                 | 1.689                                                        | 8.399                          | 414.52             | 3481.42            | 14.186                         | 380.45             | 5397.20            |
| A_68_P21911518 | chr2:181326975-181327019                          | NM_001164597:170        | Znf512b       | INSIDE                 | 1.689                                                        | 8.697                          | 1229.90            | 10697.01           | 14.691                         | 829.14             | 12180.90           |
| A_68_P25108786 | chr7:56137106-56137150                            | NM_001013368:-717       | Ezr1          | PROMOTER               | 1.688                                                        | 4.136                          | 2662.40            | 11010.37           | 6.982                          | 2311.18            | 16136.32           |
| A_68_P25951936 | chr8:72976257-72976301                            | NM_001122830:24564      | Klh26         | INSIDE                 | 1.688                                                        | 2.504                          | 251.71             | 630.21             | 4.226                          | 258.31             | 1091.58            |
| A_68_P27922756 | chr11:74651953-74651997                           | NM_010813:7549          | Mnt           | INSIDE                 | 1.688                                                        | 2.764                          | 2511.91            | 6941.73            | 4.665                          | 2144.68            | 10004.52           |
| A_68_P24592748 | chr6:83267406-83267450                            | NM_008638:170           | Mthfd2        | INSIDE                 | 1.688                                                        | 1.747                          | 2418.50            | 4225.33            | 2.950                          | 1884.64            | 5558.99            |
| A_68_P31831023 | chr18:74602569-74602613                           | NM_201600:318           | Myo5b         | INSIDE                 | 1.688                                                        | 3.289                          | 454.80             | 1495.78            | 5.552                          | 442.03             | 2454.05            |
| A_68_P27503014 | chr10:120787968-120788012                         | ENSMUST00000078515:7663 |               | DOWNSTREAM             | 1.688                                                        | 3.951                          | 4977.57            | 19668.80           | 6.670                          | 3764.39            | 25109.76           |
| A_68_P23408691 | chr4:150229048-150229092                          | NM_133753:-129          | Errf1         | PROMOTER               | 1.687                                                        | 3.514                          | 1955.79            | 6873.54            | 5.929                          | 1754.32            | 10401.00           |
| A_68_P20897125 | chr1:186551788-186551832                          | NM_008250:4562          | Hlx           | INSIDE                 | 1.687                                                        | 2.130                          | 1138.59            | 2425.27            | 3.593                          | 783.07             | 2813.61            |
| A_68_P30495553 | chr15:101858609-101858653                         | NM_010664:-16           | Krt18         | PROMOTER               | 1.687                                                        | 2.231                          | 1396.41            | 3114.85            | 3.763                          | 1205.16            | 4535.54            |
| A_68_P24623660 | chr6:88674554-88674598                            | NM_001166250:-121       | Mgll          | PROMOTER               | 1.687                                                        | 7.609                          | 2563.93            | 19509.59           | 12.836                         | 2246.95            | 28842.34           |
| A_68_P32579464 | chrX:102347631-102347675                          | AK136781:-2542          |               | PROMOTER               | 1.687                                                        | 3.600                          | 31139.15           | 112101.40          | 6.072                          | 23137.23           | 140486.60          |
| A_68_P27085191 | chr10:40402970-40403014                           | NM_177793:-95           | 9030224M15Rik | PROMOTER               | 1.686                                                        | 2.249                          | 1059.70            | 2383.52            | 3.792                          | 947.30             | 3592.40            |
| A_68_P28079629 | chr11:102308671-102308715                         | NM_199200:285           | Fam171a2      | INSIDE                 | 1.686                                                        | 1.895                          | 1504.43            | 2851.23            | 3.195                          | 1335.07            | 4265.03            |
| A_68_P31937108 | chr19:7054737-7054781                             | NM_008020:172           | Fkbp2         | INSIDE                 | 1.686                                                        | 3.435                          | 4409.51            | 15146.83           | 5.790                          | 3177.15            | 18395.36           |
| A_68_P31938321 | chr19:7239801-7239845                             | NM_134147:108565        | Macrodl       | INSIDE                 | 1.686                                                        | 7.484                          | 804.27             | 6019.42            | 12.615                         | 664.54             | 8383.14            |
| A_68_P27931783 | chr11:76212254-76212298                           | NM_008750:367           | Nxn           | INSIDE                 | 1.686                                                        | 2.497                          | 957.35             | 2390.08            | 4.210                          | 767.91             | 3232.83            |
| A_68_P31065956 | chr17:15635037-15635081                           | NM_011185:182           | Psmb1         | INSIDE                 | 1.686                                                        | 3.282                          | 3320.49            | 10897.30           | 5.535                          | 2703.66            | 14963.44           |
| A_68_P22063513 | chr3:37319180-37319224                            | NM_001163511:1          | Spata5        | INSIDE                 | 1.686                                                        | 1.914                          | 702.42             | 1344.19            | 3.226                          | 643.62             | 2076.33            |
| A_68_P28601528 | chr12:86337027-86337071                           | NM_178363:-222          | Ylpm1         | PROMOTER               | 1.686                                                        | 2.102                          | 574.60             | 1208.09            | 3.545                          | 463.35             | 1642.77            |
| A_68_P25949121 | chr8:72498323-72498367                            | NM_001113346:-62        | Gatad2a       | PROMOTER               | 1.685                                                        | 5.348                          | 4294.38            | 22967.53           | 9.012                          | 3393.33            | 30579.31           |
| A_68_P22378540 | chr3:101815556-101815600                          | NM_178777:1511          | Nhlh2         | INSIDE                 | 1.685                                                        | 2.047                          | 1560.93            | 3195.92            | 3.450                          | 1276.07            | 4402.83            |
| A_68_P27835010 | chr11:58947926-58947970                           | NM_001171512:1929       | Obscn         | INSIDE                 | 1.685                                                        | 5.288                          | 2672.68            | 14132.77           | 8.908                          | 1825.71            | 16262.78           |
| A_68_P30486488 | chr15:100408907-100408951                         | NM_010127:7868          | Pou6f1        | INSIDE                 | 1.685                                                        | 3.988                          | 537.02             | 2141.41            | 6.718                          | 406.10             | 2728.33            |
| A_68_P23599458 | chr5:35621995-35622039                            | NM_007418:802           | Adra2c        | INSIDE                 | 1.684                                                        | 1.754                          | 1240.19            | 2175.88            | 2.955                          | 1041.02            | 3076.60            |
| A_68_P26022557 | chr8:87427077-87427121                            | NM_010635:1272          | Klfl          | INSIDE                 | 1.684                                                        | 1.831                          | 1470.19            | 2692.40            | 3.084                          | 1256.92            | 3876.80            |
| A_68_P20029518 | chr1:10983714-10983758                            | NM_029525:191           | Prex2         | INSIDE                 | 1.684                                                        | 7.473                          | 2583.25            | 19305.26           | 12.589                         | 1991.24            | 25067.06           |
| A_68_P25587467 | chr7:148401624-148401668                          | NM_025886:-112          | Rassf7        | DIVERGENT_PROMOTER     | 1.684                                                        | 3.437                          | 3882.06            | 13343.77           | 5.788                          | 2929.80            | 16958.03           |
| A_68_P26878665 | chr9:120486576-120486620                          | NM_025974:5965          | Rpl14         | DOWNSTREAM             | 1.684                                                        | 1.848                          | 1419.03            | 2622.10            | 3.112                          | 1187.42            | 3695.48            |
| A_68_P30486834 | chr15:100467426-100467470                         | NM_001033872:-152       | Smagp         | PROMOTER               | 1.684                                                        | 1.671                          | 1685.07            | 2816.45            | 2.815                          | 1373.73            | 3866.96            |
| A_68_P32217704 | chr19:59246215-59246259                           | NM_009501:-1717         | Vax1          | PROMOTER               | 1.684                                                        | 2.583                          | 3160.67            | 8165.50            | 4.349                          | 2353.74            | 10237.25           |
| A_68_P25952317 | chr8:73030680-73030724                            | NM_025577:-64           | 2810428115Rik | PROMOTER               | 1.683                                                        | 3.799                          | 2054.35            | 7803.78            | 6.392                          | 1708.79            | 10922.38           |
| A_68_P32260277 | chrX:11657663-11657707                            | NM_029510:-5            | Beor          | PROMOTER               | 1.683                                                        | 3.273                          | 1448.95            | 4742.62            | 5.508                          | 876.58             | 4828.15            |
| A_68_P30655034 | chr16:32877951-32877995                           | NM_001159349:103        | Fyttl2        | INSIDE                 | 1.683                                                        | 2.031                          | 1813.46            | 3682.82            | 3.417                          | 1446.40            | 4943.06            |
| A_68_P27019249 | chr10:26095302-26095346                           | NM_172787:-333          | L3mbtl3       | PROMOTER               | 1.683                                                        | 2.585                          | 3469.39            | 8967.44            | 4.350                          | 2605.96            | 11334.74           |
| A_68_P31938323 | chr19:7240213-7240257                             | NM_134147:108977        | Macrodl       | INSIDE                 | 1.683                                                        | 3.757                          | 3541.01            | 13303.16           | 6.324                          | 2898.79            | 18332.07           |
| A_68_P25458299 | chr7:125591289-125591333                          | NM_138649:-4244         | Syt17         | PROMOTER               | 1.683                                                        | 5.072                          | 2430.45            | 12326.97           | 8.537                          | 2032.42            | 17351.21           |
| A_68_P31713387 | A_68_P31713387                                    |                         | Unknown       |                        | 1.683                                                        | 3.053                          | 751.00             | 2292.45            | 5.137                          | 499.62             | 2566.44            |
| A_68_P32467861 | chrX:71638358-71638402                            | NM_025473:98            | Fam3a         | INSIDE                 | 1.682                                                        | 4.438                          | 2419.47            | 10737.62           | 7.463                          | 1406.81            | 10498.39           |
| A_68_P28187039 | chr11:120686317-120686365                         | NM_007988:-479          | Fasn          | PROMOTER               | 1.682                                                        | 4.348                          | 211.73             | 920.69             | 7.315                          | 146.38             | 1070.69            |
| A_68_P23955154 | chr5:105844706-105844750                          | NM_001033550:-65        | Lrre8b        | PROMOTER               | 1.682                                                        | 3.890                          | 293.53             | 1141.87            | 6.542                          | 220.20             | 1440.47            |
| A_68_P26015636 | chr8:86118488-86118532                            | NM_027179:-120          | Tecr          | PROMOTER               | 1.682                                                        | 3.147                          | 1544.48            | 4861.07            | 5.293                          | 1080.67            | 5720.53            |
| A_68_P28157432 | chr11:115970917-115970961                         | NM_001205081:611        | Trim47        | INSIDE                 | 1.682                                                        | 5.953                          | 1398.78            | 8326.68            | 10.014                         | 1042.65            | 10441.36           |
| A_68_P22702205 | chr4:5571555-5571599                              | NM_173426:251           | Fam110b       | INSIDE                 | 1.681                                                        | 6.974                          | 1660.64            | 11580.84           | 11.726                         | 1443.83            | 16930.61           |
| A_68_P21784239 | chr2:158492898-158492942                          | NM_001159662:50         | Ppp1r16b      | INSIDE                 | 1.681                                                        | 3.141                          | 534.12             | 1677.59            | 5.279                          | 476.36             | 2514.85            |

| ProbeName      | Target position of probe on CpG island microarray | TargetID                 | GeneSymbol | CpG island Description | Ratio of relative methylation (TiO <sub>2</sub> -NP/Vehicle) | Sham group                     |                    |                    | TiO <sub>2</sub> -H group      |                    |                    |
|----------------|---------------------------------------------------|--------------------------|------------|------------------------|--------------------------------------------------------------|--------------------------------|--------------------|--------------------|--------------------------------|--------------------|--------------------|
|                |                                                   |                          |            |                        |                                                              | Relative methylation (Cy5/Cy3) | Cy3 signal (Input) | Cy5 signal (MeDIP) | Relative methylation (Cy5/Cy3) | Cy3 signal (Input) | Cy5 signal (MeDIP) |
| A_68_P27177053 | chr10:60293340-60293384                           | NM_029770:967            | Unc5b      | INSIDE                 | 1.681                                                        | 2.249                          | 1672.25            | 3760.27            | 3.780                          | 1433.56            | 5418.84            |
| A_68_P27907301 | chr11:71564787-71564831                           | NM_177618:604            | Wscd1      | INSIDE                 | 1.681                                                        | 2.114                          | 1199.61            | 2536.24            | 3.555                          | 939.08             | 3338.21            |
| A_68_P26600189 | chr9:67480966-67481010                            |                          | Unknown    |                        | 1.681                                                        | 1.691                          | 3911.43            | 6613.30            | 2.842                          | 3124.26            | 8879.43            |
| A_68_P29643102 | chr14:60796162-60796206                           | ENSMUST00000140924:192   |            |                        | 1.681                                                        | 1.602                          | 871.83             | 1396.31            | 2.692                          | 731.71             | 1969.76            |
| A_68_P27855082 | chr11:62461774-62461819                           | NM_198861:229            | BC046404   | INSIDE                 | 1.680                                                        | 3.524                          | 546.37             | 1925.28            | 5.918                          | 463.03             | 2740.32            |
| A_68_P30500966 | chr15:102785392-102785436                         | NM_001024842:458         | Hoxc11     | INSIDE                 | 1.680                                                        | 1.528                          | 651.42             | 995.66             | 2.568                          | 617.42             | 1585.58            |
| A_68_P28803336 | chr13:6648044-6648088                             | NM_019703:-96            | Pfkp       | PROMOTER               | 1.680                                                        | 2.512                          | 1278.91            | 3213.24            | 4.221                          | 960.08             | 4052.59            |
| A_68_P25375611 | chr7:108970306-108970350                          | NM_008887:3502           | Phox2a     | INSIDE                 | 1.680                                                        | 2.025                          | 711.87             | 1441.29            | 3.402                          | 593.26             | 2018.49            |
| A_68_P26787844 | chr9:103663476-103663520                          | NM_178638:669            | Tmem108    | INSIDE                 | 1.680                                                        | 6.287                          | 1990.88            | 12516.72           | 10.564                         | 1533.51            | 16200.24           |
| A_68_P22570418 | chr3:138405498-138405542                          | NM_019571:362            | Tspan5     | INSIDE                 | 1.680                                                        | 4.376                          | 1624.13            | 7106.38            | 7.351                          | 1326.85            | 9753.60            |
| A_68_P25219571 | chr7:78850463-78850507                            |                          | Unknown    |                        | 1.680                                                        | 1.438                          | 1733.56            | 2493.05            | 2.415                          | 1453.41            | 3510.59            |
| A_68_P21109230 | chr2:31315614-31315658                            | ENSMUST00000142448:13382 |            |                        | 1.680                                                        | 4.368                          | 3026.10            | 13217.90           | 7.338                          | 2593.91            | 19033.59           |
| A_68_P24057001 | chr5:124133506-124133550                          | NM_019765:772            | Clip1      | INSIDE                 | 1.679                                                        | 2.030                          | 4945.46            | 10040.83           | 3.408                          | 3721.90            | 12684.82           |
| A_68_P30585937 | chr16:20098035-20098079                           | NM_029436:430            | Klhl24     | INSIDE                 | 1.679                                                        | 2.574                          | 1667.15            | 4291.61            | 4.323                          | 1290.36            | 5578.07            |
| A_68_P22530159 | chr3:130813231-130813275                          | NM_010703:-136           | Lef1       | PROMOTER               | 1.679                                                        | 2.180                          | 900.09             | 1962.64            | 3.661                          | 805.09             | 2947.17            |
| A_68_P28875600 | chr13:22073387-22073431                           | NM_001162929:346         | Pom121l2   | INSIDE                 | 1.679                                                        | 2.064                          | 2503.61            | 5166.48            | 3.465                          | 2055.02            | 7119.94            |
| A_68_P23978771 | chr5:110715204-110715248                          | NM_008993:-39            | Pxmp2      | DIVERGENT_PROMOTER     | 1.679                                                        | 2.132                          | 1477.40            | 3149.50            | 3.579                          | 1219.87            | 4365.70            |
| A_68_P31420286 | chr17:87362969-87363013                           | NM_145491:540            | Rhoq       | INSIDE                 | 1.679                                                        | 3.749                          | 3149.75            | 11807.75           | 6.296                          | 2640.34            | 16622.98           |
| A_68_P21752666 | chr2:152880620-152880664                          | NM_001011732:23055       | Xkr7       | INSIDE                 | 1.679                                                        | 4.032                          | 1917.47            | 7731.35            | 6.769                          | 1550.20            | 10493.70           |
| A_68_P32369653 | chrX:47014094-47014138                            | ENSMUST00000121891:-20   |            | PROMOTER               | 1.679                                                        | 3.462                          | 1160.79            | 4018.34            | 5.812                          | 565.03             | 3283.98            |
| A_68_P22314836 | chr3:88425692-88425736                            | NM_001198912:399         | Arhgef2    | INSIDE                 | 1.678                                                        | 6.619                          | 2870.12            | 18996.50           | 11.103                         | 2409.48            | 26752.56           |
| A_68_P26134609 | chr8:108089863-108089907                          | NM_013477:56             | Atp6v0d1   | INSIDE                 | 1.678                                                        | 1.831                          | 3683.70            | 6745.62            | 3.072                          | 2918.43            | 8965.38            |
| A_68_P26019650 | chr8:86938371-86938415                            | NM_007578:-870           | Caeca1a    | PROMOTER               | 1.678                                                        | 2.045                          | 684.93             | 1400.45            | 3.431                          | 614.58             | 2108.74            |
| A_68_P29511369 | chr14:32149798-32149842                           | NM_009796:-89            | Capn7      | PROMOTER               | 1.678                                                        | 1.996                          | 1279.78            | 2554.88            | 3.350                          | 1041.19            | 3487.70            |
| A_68_P27845567 | chr11:60745252-60745296                           | NR_027800:95             | Gm16516    | INSIDE                 | 1.678                                                        | 3.036                          | 937.83             | 2847.45            | 5.094                          | 736.27             | 3750.27            |
| A_68_P31425152 | chr17:88197017-88197061                           | NM_199251:296            | Kenk12     | INSIDE                 | 1.678                                                        | 3.655                          | 1476.38            | 5396.14            | 6.132                          | 1317.96            | 8082.18            |
| A_68_P20634033 | chr11:136457792-136457836                         | NM_152895:1060           | Kdm5b      | INSIDE                 | 1.678                                                        | 3.188                          | 3541.18            | 11290.03           | 5.350                          | 2979.49            | 15940.59           |
| A_68_P20453282 | chr11:94998673-94998717                           | NM_001110315:-252        | Kif1a      | PROMOTER               | 1.678                                                        | 2.859                          | 3722.33            | 10641.12           | 4.798                          | 2631.13            | 12622.95           |
| A_68_P27629548 | chr11:19921114-19921161                           | NM_033523:96693          | Spred2     | INSIDE                 | 1.678                                                        | 2.842                          | 623.29             | 1771.16            | 4.768                          | 471.80             | 2249.64            |
| A_68_P26974633 | chr10:18038772-18038816                           |                          | Unknown    |                        | 1.678                                                        | 3.825                          | 2132.84            | 8158.55            | 6.421                          | 1708.52            | 10969.63           |
| A_68_P23154895 | chr4:101091776-101091820                          | NM_001177602:-95         | Ak4        | PROMOTER               | 1.677                                                        | 3.409                          | 2375.71            | 8097.86            | 5.716                          | 1900.31            | 10862.63           |
| A_68_P23881743 | chr5:90652818-90652862                            | NM_001033310:181         | Cox18      | INSIDE                 | 1.677                                                        | 4.340                          | 544.98             | 2365.02            | 7.278                          | 501.88             | 3652.77            |
| A_68_P32119294 | chr19:42222686-42222730                           | NM_183195:830            | Marveld1   | INSIDE                 | 1.677                                                        | 1.867                          | 2718.81            | 5074.92            | 3.130                          | 2118.62            | 6630.74            |
| A_68_P25957541 | chr8:74093810-74093856                            | NM_011977:1007           | Sle27a1    | INSIDE                 | 1.677                                                        | 1.544                          | 2369.95            | 3658.60            | 2.589                          | 1777.86            | 4603.28            |
| A_68_P28447129 | chr12:55414382-55414426                           |                          | Unknown    |                        | 1.677                                                        | 5.392                          | 728.27             | 3926.73            | 9.043                          | 644.52             | 5828.41            |
| A_68_P28576811 | chr12:81744792-81744836                           | NM_007951:34             | Erh        | INSIDE                 | 1.676                                                        | 3.329                          | 3732.87            | 12426.91           | 5.578                          | 2902.64            | 16192.26           |
| A_68_P28728718 | chr12:109792810-109792854                         | NM_001163394:-97         | Evl        | PROMOTER               | 1.676                                                        | 3.664                          | 11008.12           | 40332.18           | 6.141                          | 7496.69            | 46040.40           |
| A_68_P23339951 | chr4:137024980-137025024                          | NM_008305:285            | Hspg2      | INSIDE                 | 1.676                                                        | 1.544                          | 880.05             | 1359.16            | 2.588                          | 737.14             | 1907.69            |
| A_68_P29453036 | chr14:22320298-22320342                           | NM_017479:1314           | Myst4      | INSIDE                 | 1.676                                                        | 3.472                          | 1367.44            | 4747.66            | 5.820                          | 1163.03            | 6768.46            |
| A_68_P25578920 | chr7:146770604-146770648                          | NR_027857:-1930          | Nkx6-2     | PROMOTER               | 1.676                                                        | 13.760                         | 1343.65            | 18488.62           | 23.064                         | 1050.68            | 24232.72           |
| A_68_P27362366 | chr10:94407709-94407753                           | NM_018797:-518           | Ptxnc1     | PROMOTER               | 1.676                                                        | 12.375                         | 270.07             | 3342.19            | 20.744                         | 254.69             | 5283.15            |
| A_68_P21110386 | chr2:31495757-31495801                            | NM_001123362:222         | Prdm12     | INSIDE                 | 1.676                                                        | 3.384                          | 3165.24            | 10710.31           | 5.671                          | 2441.02            | 13843.20           |
| A_68_P31054932 | chr17:13200778-13200822                           | NM_013671:96             | Sod2       | INSIDE                 | 1.676                                                        | 3.293                          | 1214.17            | 3997.88            | 5.520                          | 988.75             | 5457.47            |
| A_68_P23982396 | chr5:111309011-111309055                          | NM_024477:211            | Tie28      | INSIDE                 | 1.676                                                        | 4.893                          | 6002.93            | 29374.08           | 8.200                          | 4758.82            | 39022.67           |
| A_68_P25023459 | A_68_P25023459                                    |                          | Unknown    |                        | 1.676                                                        | 3.074                          | 1800.55            | 5535.34            | 5.153                          | 1467.75            | 7563.92            |
| A_68_P26538539 | chr9:56644557-56644601                            | AK155716:4490            |            | DOWNSTREAM             | 1.676                                                        | 2.512                          | 4014.41            | 10083.20           | 4.210                          | 3008.83            | 12668.33           |
| A_68_P22342541 | chr3:94965423-94965467                            | NM_011351:-2851          | Sema6c     | PROMOTER               | 1.675                                                        | 3.265                          | 2048.94            | 6690.65            | 5.471                          | 1637.88            | 8960.23            |
| A_68_P30574556 | chr16:17576756-17576800                           | NM_144852:-14            | Sle7a4     | PROMOTER               | 1.675                                                        | 2.076                          | 1704.75            | 3539.73            | 3.478                          | 1349.50            | 4693.46            |
| A_68_P24880087 | chr6:137683557-137683601                          | NM_011499:-24            | Strap      | PROMOTER               | 1.675                                                        | 4.583                          | 993.38             | 4552.59            | 7.675                          | 898.68             | 6897.24            |
| A_68_P22475542 | chr3:120966000-120966044                          | NM_178936:212            | Tmem56     | INSIDE                 | 1.675                                                        | 2.106                          | 842.69             | 1774.56            | 3.527                          | 788.56             | 2781.43            |
| A_68_P32328720 | chrX:35988386-35988430                            | NM_021550:-88            | C1gal1c1   | PROMOTER               | 1.674                                                        | 1.782                          | 1695.13            | 3021.24            | 2.983                          | 981.43             | 2927.47            |

| ProbeName      | Target position of probe on CpG island microarray | TargetID                | GeneSymbol    | CpG island Description | Ratio of relative methylation (TiO <sub>2</sub> -NP/Vehicle) | Sham group                     |                    |                    | TiO <sub>2</sub> -H group      |                    |                    |
|----------------|---------------------------------------------------|-------------------------|---------------|------------------------|--------------------------------------------------------------|--------------------------------|--------------------|--------------------|--------------------------------|--------------------|--------------------|
|                |                                                   |                         |               |                        |                                                              | Relative methylation (Cy5/Cy3) | Cy3 signal (Input) | Cy5 signal (MeDIP) | Relative methylation (Cy5/Cy3) | Cy3 signal (Input) | Cy5 signal (MeDIP) |
| A_68_P23362371 | chr4:140695718-140695762                          | NM_001025608:-29        | D4Erd22e      | DIVERGENT_PROMOTER     | 1.674                                                        | 1.754                          | 970.90             | 1703.27            | 2.937                          | 788.18             | 2314.72            |
| A_68_P22081210 | chr3:40548895-40548939                            | NM_011020:-618          | Hspa4l        | PROMOTER               | 1.674                                                        | 3.368                          | 1544.20            | 5200.55            | 5.638                          | 1142.24            | 6439.66            |
| A_68_P25088126 | chr7:51807778-51807822                            | NM_009473:1493          | Nr1h2         | INSIDE                 | 1.674                                                        | 12.326                         | 8310.29            | 102431.80          | 20.637                         | 5463.46            | 112750.90          |
| A_68_P23318161 | chr4:133101757-133101801                          | NM_010948:164           | Nude          | INSIDE                 | 1.674                                                        | 6.262                          | 3142.55            | 19678.21           | 10.484                         | 2430.84            | 25484.19           |
| A_68_P24039106 | chr5:120953388-120953432                          | NM_023625:222           | Pibid2        | INSIDE                 | 1.674                                                        | 3.995                          | 959.96             | 3834.81            | 6.686                          | 724.31             | 4842.55            |
| A_68_P24864240 | chr6:134871160-134871204                          | NM_009875:764           | Cdkn1b        | INSIDE                 | 1.673                                                        | 2.662                          | 3361.10            | 8948.92            | 4.453                          | 2603.18            | 11592.14           |
| A_68_P28947125 | chr13:36209443-36209487                           | NM_001039189:185        | Fars2         | INSIDE                 | 1.673                                                        | 3.957                          | 2648.53            | 10479.59           | 6.621                          | 2399.06            | 15884.25           |
| A_68_P30884140 | chr16:76372608-76372652                           | NM_173440:664           | Nrip1         | INSIDE                 | 1.673                                                        | 1.856                          | 339.43             | 630.12             | 3.106                          | 264.27             | 820.80             |
| A_68_P31918148 | chr19:3575782-3575826                             | NM_001164159:-55        | Ppp6r3        | PROMOTER               | 1.673                                                        | 1.972                          | 7854.17            | 15489.25           | 3.299                          | 5282.36            | 17424.43           |
| A_68_P21890548 | chr2:178142227-178142271                          | NM_177191:115           | Sycp2         | INSIDE                 | 1.673                                                        | 4.488                          | 7874.68            | 35339.82           | 7.508                          | 6281.03            | 47156.69           |
| A_68_P24810492 | chr6:122751807-122751851                          | ENSMUST00000165884:-170 |               | PROMOTER               | 1.673                                                        | 2.515                          | 1274.24            | 3204.41            | 4.207                          | 950.85             | 3999.78            |
| A_68_P25592704 | chr7:149246956-149247000                          | NM_028308:-39           | 2700078K21Rik | PROMOTER               | 1.672                                                        | 3.416                          | 1686.03            | 5759.23            | 5.712                          | 1471.01            | 802.10             |
| A_68_P23880193 | chr5:90312354-90312398                            | NM_001081401:-17        | Adams3        | PROMOTER               | 1.672                                                        | 1.889                          | 2641.21            | 4989.44            | 3.159                          | 2203.61            | 6960.59            |
| A_68_P24004993 | chr5:115061259-115061303                          | NM_001004180:43021      | BC057022      | INSIDE                 | 1.672                                                        | 4.702                          | 9280.21            | 43633.32           | 7.863                          | 6289.56            | 49452.98           |
| A_68_P29571979 | chr14:46277367-46277411                           | NM_001039106:430        | Dhdh1         | INSIDE                 | 1.672                                                        | 3.868                          | 8539.33            | 33027.56           | 6.465                          | 7021.19            | 45391.26           |
| A_68_P28198379 | chr12:4038471-4038515                             | NM_001082483:423        | Efr3b         | INSIDE                 | 1.672                                                        | 4.411                          | 3726.36            | 16435.80           | 7.373                          | 2986.38            | 22017.64           |
| A_68_P25176077 | chr7:71432423-71432467                            | NM_172742:-111          | Mtmr10        | PROMOTER               | 1.672                                                        | 1.737                          | 383.89             | 666.99             | 2.905                          | 368.33             | 1070.00            |
| A_68_P27280126 | chr10:79440000-79440044                           | NM_001003949:7053       | ORF61         | INSIDE                 | 1.672                                                        | 6.151                          | 2393.85            | 14723.85           | 10.284                         | 1638.63            | 16851.02           |
| A_68_P26038373 | chr8:90485269-90485313                            | NM_033327:-1796         | Zfp423        | PROMOTER               | 1.672                                                        | 9.737                          | 873.67             | 8506.77            | 16.277                         | 734.07             | 11948.65           |
| A_68_P27903827 | chr11:70817840-70817884                           | NM_178367:72            | Dhx33         | INSIDE                 | 1.671                                                        | 2.399                          | 725.62             | 1740.90            | 4.009                          | 589.10             | 2361.84            |
| A_68_P28334080 | chr12:32634604-32634648                           | NM_153198:774           | Hbp1          | INSIDE                 | 1.671                                                        | 4.411                          | 447.47             | 1973.84            | 7.371                          | 388.89             | 2866.41            |
| A_68_P24592782 | chr6:83275935-83275979                            | NM_145571:-76           | Mobkl1b       | DIVERGENT_PROMOTER     | 1.671                                                        | 2.406                          | 1230.29            | 2959.67            | 4.021                          | 999.48             | 4018.65            |
| A_68_P33005865 | A_68_P33005865                                    |                         | Unknown       |                        | 1.671                                                        | 5.393                          | 410.63             | 2214.72            | 9.013                          | 385.94             | 3478.49            |
| A_68_P23593951 | chr5:34712334-34712378                            | ENSMUST0000042234:-705  |               | PROMOTER               | 1.671                                                        | 1.855                          | 3498.72            | 6491.48            | 3.100                          | 2620.62            | 8123.74            |
| A_68_P31341460 | chr17:72953599-72953644                           | NM_007439:26            | Alk           | INSIDE                 | 1.670                                                        | 1.974                          | 746.72             | 1473.91            | 3.296                          | 648.62             | 2137.91            |
| A_68_P24980722 | chr7:16885176-16885220                            | NM_133234:-9733         | Bbc3          | PROMOTER               | 1.670                                                        | 1.553                          | 819.54             | 1272.83            | 2.594                          | 910.99             | 2363.33            |
| A_68_P29773624 | chr14:84843322-84843371                           | NM_001013753:-23        | Pcdh17        | PROMOTER               | 1.670                                                        | 2.058                          | 854.99             | 1759.49            | 3.436                          | 615.33             | 2114.28            |
| A_68_P22484168 | chr3:122432681-122432725                          | NM_153422:627           | Pde5a         | INSIDE                 | 1.670                                                        | 4.891                          | 2019.15            | 9875.76            | 8.168                          | 1558.90            | 12732.31           |
| A_68_P24114960 | chr5:135625731-135625775                          | NM_013763:172           | Tbl2          | INSIDE                 | 1.670                                                        | 3.290                          | 1092.96            | 3595.91            | 5.494                          | 907.58             | 4986.45            |
| A_68_P28119631 | chr11:109473059-109473103                         | NM_145940:-377          | Wipi1         | PROMOTER               | 1.670                                                        | 3.869                          | 13921.71           | 53858.78           | 6.460                          | 10681.12           | 68996.43           |
| A_68_P25051309 | chr7:36588072-36588116                            | NM_177739:-86           | Zfp507        | PROMOTER               | 1.670                                                        | 3.097                          | 459.55             | 1423.12            | 5.172                          | 360.31             | 1863.39            |
| A_68_P29672919 | chr14:65962555-65962599                           | AK028094:17409          |               | DOWNSTREAM             | 1.670                                                        | 3.682                          | 6108.28            | 22488.65           | 6.147                          | 4492.65            | 27616.55           |
| A_68_P20972053 | chr2:5058960-5059004                              | NM_028804:161           | Ccdc3         | INSIDE                 | 1.669                                                        | 4.180                          | 648.95             | 2712.90            | 6.979                          | 534.03             | 3726.86            |
| A_68_P23250457 | chr4:119959679-119959723                          | NM_194060:166           | Foxo6         | INSIDE                 | 1.669                                                        | 2.359                          | 676.94             | 1597.15            | 3.937                          | 600.87             | 2365.41            |
| A_68_P32625282 | chrX:117040767-117040811                          | NM_053114:-16           | Pabpc5        | PROMOTER               | 1.669                                                        | 4.541                          | 2248.43            | 10209.47           | 7.577                          | 1645.15            | 12464.63           |
| A_68_P28875767 | chr13:22097925-22097969                           | NM_019429:3664          | Prss16        | INSIDE                 | 1.669                                                        | 3.391                          | 1172.37            | 3975.96            | 5.660                          | 929.50             | 5260.78            |
| A_68_P23576447 | chr5:31395717-31395761                            | NM_011773:162           | Slc30a3       | INSIDE                 | 1.669                                                        | 3.772                          | 1644.43            | 6202.22            | 6.295                          | 1250.89            | 7873.75            |
| A_68_P27952852 | chr11:79967507-79967551                           | NM_172133:-135          | Adap2         | PROMOTER               | 1.668                                                        | 4.869                          | 1002.22            | 4879.41            | 8.122                          | 801.83             | 6512.36            |
| A_68_P24167580 | chr5:147072895-147072939                          | NM_153599:29666         | Cdk8          | INSIDE                 | 1.668                                                        | 2.767                          | 354.85             | 982.03             | 4.616                          | 296.88             | 1370.38            |
| A_68_P20391718 | chr1:82287606-82287650                            | NM_010570:386           | Irs1          | INSIDE                 | 1.668                                                        | 4.812                          | 2917.59            | 14038.80           | 8.028                          | 2754.29            | 22111.30           |
| A_68_P28004910 | chr11:89163525-89163569                           | NM_008711:327           | Nog           | INSIDE                 | 1.668                                                        | 1.556                          | 2076.56            | 3230.68            | 2.595                          | 1813.25            | 4705.13            |
| A_68_P24951673 | chr7:4981991-4982035                              | NM_001033383:10035      | Zfp865        | INSIDE                 | 1.668                                                        | 3.797                          | 2167.70            | 8231.60            | 6.333                          | 1920.71            | 12163.49           |
| A_68_P33005883 | A_68_P33005883                                    |                         | Unknown       |                        | 1.668                                                        | 6.752                          | 372.39             | 2514.24            | 11.259                         | 306.52             | 3451.06            |
| A_68_P30969546 | chr16:92498878-92498922                           | NM_172469:509           | Clic6         | INSIDE                 | 1.667                                                        | 6.182                          | 3756.63            | 23221.76           | 10.303                         | 2929.22            | 30179.61           |
| A_68_P30113003 | chr15:31154105-31154149                           | NM_146057:-13           | Dap           | PROMOTER               | 1.667                                                        | 3.313                          | 3856.43            | 12776.00           | 5.524                          | 3116.01            | 17212.56           |
| A_68_P24052812 | chr5:123350466-123350510                          | NM_013910:-129          | Kdm2b         | PROMOTER               | 1.667                                                        | 3.445                          | 921.33             | 3173.67            | 5.744                          | 809.91             | 4651.76            |
| A_68_P28936013 | chr13:34094245-34094289                           | NR_028309:352           | Serpinb6a     | INSIDE                 | 1.667                                                        | 2.063                          | 1185.68            | 2445.85            | 3.438                          | 1038.65            | 3571.02            |
| A_68_P31412116 | chr17:86087149-86087193                           | NM_011380:424           | Six2          | INSIDE                 | 1.667                                                        | 2.596                          | 711.32             | 1846.23            | 4.328                          | 623.31             | 2697.39            |
| A_68_P29703989 | chr14:71289781-71289825                           | NM_008115:-134          | Gfra2         | PROMOTER               | 1.666                                                        | 6.103                          | 2103.42            | 12836.84           | 10.165                         | 1664.63            | 16920.80           |
| A_68_P21077785 | chr2:26171010-26171055                            | NM_001199146:-20        | Gpsm1         | PROMOTER               | 1.666                                                        | 9.846                          | 2502.21            | 24637.89           | 16.405                         | 2243.11            | 36797.72           |
| A_68_P32140499 | chr19:45857773-45857817                           | NM_023799:-13           | Mgea5         | PROMOTER               | 1.666                                                        | 6.837                          | 801.80             | 5481.57            | 11.390                         | 704.42             | 8023.62            |

| ProbeName      | Target position of probe on CpG island microarray | TargetID               | GeneSymbol    | CpG island Description | Ratio of relative methylation (TiO <sub>2</sub> -NP/Vehicle) | Sham group                     |                    |                    | TiO <sub>2</sub> -H group      |                    |                    |
|----------------|---------------------------------------------------|------------------------|---------------|------------------------|--------------------------------------------------------------|--------------------------------|--------------------|--------------------|--------------------------------|--------------------|--------------------|
|                |                                                   |                        |               |                        |                                                              | Relative methylation (Cy5/Cy3) | Cy3 signal (Input) | Cy5 signal (MeDIP) | Relative methylation (Cy5/Cy3) | Cy3 signal (Input) | Cy5 signal (MeDIP) |
| A_68_P25050056 | chr7:36369864-36369908                            | NM_145840:715          | Rgs9bp        | INSIDE                 | 1.666                                                        | 3.717                          | 1154.63            | 4292.02            | 6.192                          | 1035.92            | 6414.88            |
| A_68_P28307270 | chr12:28028339-28028383                           | NM_009234:-777         | Sox11         | PROMOTER               | 1.666                                                        | 2.492                          | 5072.19            | 12642.29           | 4.152                          | 3722.72            | 15456.05           |
| A_68_P27966238 | chr11:82248332-82248376                           | NM_023438:45953        | Tmem132e      | INSIDE                 | 1.666                                                        | 6.280                          | 392.39             | 2464.03            | 10.459                         | 334.54             | 3499.15            |
| A_68_P26134000 | chr8:107995392-107995436                          | NM_026481:-92          | Tppp3         | PROMOTER               | 1.666                                                        | 4.999                          | 3639.91            | 18195.52           | 8.330                          | 2948.59            | 24560.81           |
| A_68_P28973959 | chr13:40799401-40799445                           | ENSMUST00000069457:49  |               | INSIDE                 | 1.666                                                        | 2.489                          | 2892.03            | 7197.48            | 4.146                          | 2339.63            | 9699.25            |
| A_68_P33007795 | chr4_random:128995-129039                         | NM_001033326:19215     | Dhrsx         | INSIDE                 | 1.665                                                        | 7.586                          | 4871.29            | 36951.56           | 12.632                         | 3359.62            | 42438.83           |
| A_68_P22569284 | chr3:138189919-138189963                          | NM_007917:786          | Eif4e         | INSIDE                 | 1.665                                                        | 4.216                          | 1266.57            | 5340.30            | 7.018                          | 1103.37            | 7743.61            |
| A_68_P20875118 | chr1:182262286-182262330                          | NR_003623:-1628        | Gm5069        | PROMOTER               | 1.665                                                        | 2.628                          | 2153.41            | 5658.70            | 4.375                          | 1699.26            | 7433.81            |
| A_68_P25652449 | chr8:11008424-11008468                            | NM_001081212:-16       | Irs2          | PROMOTER               | 1.665                                                        | 3.958                          | 982.97             | 3891.03            | 6.591                          | 988.57             | 6515.77            |
| A_68_P23591267 | A_68_P23591267                                    |                        |               | Unknown                | 1.665                                                        | 4.040                          | 288.57             | 1165.95            | 6.729                          | 219.26             | 1475.35            |
| A_68_P24636070 | chr6:90938255-90938299                            |                        |               | Unknown                | 1.665                                                        | 1.851                          | 336.69             | 623.25             | 3.082                          | 268.57             | 827.71             |
| A_68_P26749720 | chr9:967900099-96790143                           | NM_153420:-279         | Acp12         | PROMOTER               | 1.664                                                        | 3.871                          | 732.83             | 2837.06            | 6.444                          | 609.12             | 3924.89            |
| A_68_P27365819 | chr10:95026630-95026674                           | NR_037212:-4697        | Mir3058       | PROMOTER               | 1.664                                                        | 4.466                          | 7057.96            | 31523.23           | 7.434                          | 6155.54            | 45758.67           |
| A_68_P32117861 | chr19:41986212-41986256                           | NM_023418:-126         | Pgam1         | PROMOTER               | 1.664                                                        | 2.604                          | 2189.77            | 5702.93            | 4.335                          | 1832.91            | 7945.02            |
| A_68_P28137825 | chr11:112643344-112643388                         | NM_011448:-157         | Sox9          | PROMOTER               | 1.664                                                        | 1.701                          | 4828.16            | 8213.36            | 2.830                          | 3355.10            | 9494.71            |
| A_68_P25042532 | chr7:34953588-34953632                            | NM_016682:-62          | Uba2          | PROMOTER               | 1.664                                                        | 13.458                         | 665.13             | 8951.22            | 22.398                         | 588.62             | 13184.03           |
| A_68_P25005234 | chr7:25292077-25292122                            | NM_146183:-6           | Zfp428        | PROMOTER               | 1.664                                                        | 1.725                          | 2355.04            | 4063.24            | 2.871                          | 1775.29            | 5097.13            |
| A_68_P22217916 | chr3:68673757-68673801                            | NM_001167996:271       | 1110032F04Rik | INSIDE                 | 1.663                                                        | 3.292                          | 653.04             | 2149.81            | 5.475                          | 646.53             | 3539.97            |
| A_68_P24797816 | chr6:120244799-120244843                          | NM_198884:-243         | B4galnt3      | PROMOTER               | 1.663                                                        | 4.357                          | 3431.01            | 14947.66           | 7.245                          | 2671.21            | 19353.42           |
| A_68_P29488024 | chr14:28435732-28435776                           | NM_177814:127          | Erc2          | INSIDE                 | 1.663                                                        | 4.562                          | 1555.19            | 7095.31            | 7.589                          | 1247.87            | 9469.50            |
| A_68_P29723690 | chr14:75131937-75131981                           | NM_016903:-193         | Esd           | PROMOTER               | 1.663                                                        | 4.245                          | 5108.14            | 21683.61           | 7.059                          | 3639.86            | 25692.86           |
| A_68_P24326454 | chr6:29383341-29383385                            | NM_001081185:210       | Finc          | INSIDE                 | 1.663                                                        | 1.445                          | 6320.78            | 9136.28            | 2.403                          | 4721.24            | 11346.29           |
| A_68_P25174396 | chr7:71082541-71082585                            | NM_021366:1239         | Klfl3         | INSIDE                 | 1.663                                                        | 5.204                          | 13884.08           | 72255.25           | 8.652                          | 11746.07           | 101631.50          |
| A_68_P30345384 | chr15:75829239-75829283                           | NM_177922:5062         | Mapk15        | INSIDE                 | 1.663                                                        | 2.283                          | 1737.25            | 3965.36            | 3.796                          | 1347.49            | 5115.13            |
| A_68_P29062977 | chr13:56805003-56805048                           | NM_001164042:-3        | Smad5         | PROMOTER               | 1.663                                                        | 6.202                          | 2821.79            | 17499.50           | 10.311                         | 2385.19            | 24592.75           |
| A_68_P32467744 | chrX:71613927-71613971                            | NM_145405:-82          | Ubl4          | PROMOTER               | 1.663                                                        | 3.501                          | 1792.31            | 6275.29            | 5.822                          | 1302.37            | 7581.90            |
| A_68_P24124212 | chr5:137506063-137506107                          | NM_001039385:-80       | Vgf           | PROMOTER               | 1.663                                                        | 2.955                          | 535.21             | 1581.64            | 4.915                          | 464.93             | 2285.03            |
| A_68_P27287623 | chr10:80599677-80599721                           | NM_010731:683          | Zbtb7a        | INSIDE                 | 1.663                                                        | 1.563                          | 1306.00            | 2041.31            | 2.600                          | 1135.28            | 2951.57            |
| A_68_P21851410 | chr2:169955855-169955909                          | NM_001033299:838       | Zfp217        | INSIDE                 | 1.663                                                        | 1.431                          | 1120.11            | 1603.07            | 2.379                          | 944.80             | 2248.13            |
| A_68_P24430828 | chr6:49023823-49023867                            | NM_029353:51           | 2410003K15Rik | INSIDE                 | 1.662                                                        | 2.935                          | 2060.46            | 6047.62            | 4.877                          | 1761.18            | 8589.71            |
| A_68_P31114987 | chr17:27341486-27341531                           | NM_146075:-125         | Lemd2         | PROMOTER               | 1.662                                                        | 1.858                          | 956.19             | 1776.83            | 3.088                          | 785.44             | 2425.69            |
| A_68_P27290094 | chr10:80959100-80959144                           | NM_134009:-14          | Ncln          | PROMOTER               | 1.662                                                        | 3.944                          | 2154.24            | 8495.68            | 6.556                          | 1834.97            | 12030.15           |
| A_68_P27942685 | chr11:78141893-78141937                           | NM_201406:-9           | Pigs          | PROMOTER               | 1.662                                                        | 1.612                          | 736.88             | 1187.49            | 2.678                          | 654.41             | 1752.51            |
| A_68_P31151050 | chr17:34067192-34067236                           | NM_009059:376          | Rgl2          | INSIDE                 | 1.662                                                        | 1.844                          | 5165.90            | 9526.14            | 3.065                          | 3410.57            | 10453.66           |
| A_68_P26579683 | chr9:63870481-63870525                            | NM_008542:-636         | Smad6         | PROMOTER               | 1.662                                                        | 2.949                          | 2979.18            | 8784.45            | 4.901                          | 2298.79            | 11266.06           |
| A_68_P28048904 | chr11:97000172-97000216                           | NM_198100:10832        | Tbkbp1        | INSIDE                 | 1.662                                                        | 4.015                          | 955.93             | 3838.25            | 6.672                          | 792.12             | 5284.78            |
| A_68_P20345418 | chr1:73954077-73954121                            | NM_027884:216923       | Tns1          | DOWNSTREAM             | 1.662                                                        | 4.095                          | 1102.23            | 4514.15            | 6.807                          | 870.43             | 5925.32            |
| A_68_P27938076 | chr11:77328807-77328851                           | NM_026185:210          | Abhd15        | INSIDE                 | 1.661                                                        | 4.965                          | 1329.88            | 6602.70            | 8.247                          | 1178.66            | 9720.12            |
| A_68_P21563665 | chr2:118199048-118199092                          | NM_201367:85           | Gpr176        | INSIDE                 | 1.661                                                        | 2.525                          | 975.61             | 2463.34            | 4.195                          | 758.84             | 3183.08            |
| A_68_P23997432 | chr5:113739494-113739538                          | NM_172718:290          | Sgsm1         | INSIDE                 | 1.661                                                        | 4.145                          | 4114.39            | 17054.40           | 6.886                          | 3205.79            | 22073.60           |
| A_68_P25377989 | chr7:109416038-109416082                          | NM_009287:-277         | Stim1         | PROMOTER               | 1.661                                                        | 5.566                          | 1377.22            | 7666.18            | 9.247                          | 1143.42            | 10572.66           |
| A_68_P31326355 | chr17:70318978-70319022                           | ENSMUST00000130971:240 |               | INSIDE                 | 1.661                                                        | 1.412                          | 1882.05            | 2656.86            | 2.345                          | 1674.32            | 3925.97            |
| A_68_P23961359 | chr5:106887678-106887722                          | NM_001005477:-515      | Barhl2        | PROMOTER               | 1.660                                                        | 2.219                          | 607.95             | 1349.18            | 3.685                          | 465.73             | 1716.21            |
| A_68_P32364027 | chrX:45694166-45694210                            | NM_178782:-346         | Bcor1         | PROMOTER               | 1.660                                                        | 4.598                          | 1081.89            | 4974.40            | 7.632                          | 723.01             | 5517.86            |
| A_68_P24486168 | chr6:59376435-59376479                            | NM_183183:-172         | Gprin3        | PROMOTER               | 1.660                                                        | 2.105                          | 1615.90            | 3401.38            | 3.494                          | 1375.65            | 4807.21            |
| A_68_P27065106 | chr10:36226802-36226846                           | NM_001081208:212       | Hs3st5        | INSIDE                 | 1.660                                                        | 1.708                          | 1289.14            | 2202.06            | 2.836                          | 1048.96            | 2974.51            |
| A_68_P30485948 | chr15:100299486-100299530                         | NM_134093:44           | Letmd1        | INSIDE                 | 1.660                                                        | 2.013                          | 1842.43            | 3709.41            | 3.343                          | 1379.91            | 4612.61            |
| A_68_P25031213 | chr7:31145836-31145880                            | NM_175478:1933         | Lrfn3         | INSIDE                 | 1.660                                                        | 6.991                          | 3361.08            | 23496.42           | 11.602                         | 2447.42            | 28394.03           |
| A_68_P25846165 | chr8:49314031-49314075                            | NM_001145937:445992    | Odz3          | INSIDE                 | 1.660                                                        | 2.794                          | 320.07             | 894.25             | 4.638                          | 302.78             | 1404.39            |
| A_68_P31420721 | chr17:87424605-87424649                           | NM_008838:115          | Pigf          | INSIDE                 | 1.660                                                        | 2.008                          | 871.61             | 1750.16            | 3.333                          | 783.45             | 2610.98            |
| A_68_P20083589 | chr1:22540314-22540358                            | NM_001012623:272227    | Rims1         | INSIDE                 | 1.660                                                        | 1.572                          | 1340.67            | 2107.75            | 2.610                          | 1166.78            | 3045.41            |

| ProbeName      | Target position of probe on CpG island microarray | TargetID               | GeneSymbol    | CpG island Description | Ratio of relative methylation (TiO <sub>2</sub> -NP/Vehicle) | Sham group                     |                    |                    | TiO <sub>2</sub> -H group      |                    |                    |
|----------------|---------------------------------------------------|------------------------|---------------|------------------------|--------------------------------------------------------------|--------------------------------|--------------------|--------------------|--------------------------------|--------------------|--------------------|
|                |                                                   |                        |               |                        |                                                              | Relative methylation (Cy5/Cy3) | Cy3 signal (Input) | Cy5 signal (MeDIP) | Relative methylation (Cy5/Cy3) | Cy3 signal (Input) | Cy5 signal (MeDIP) |
| A_68_P28862223 | chr13:19487305-19487349                           | NM_024270:295          | Stard3nl      | INSIDE                 | 1.660                                                        | 1.728                          | 1020.53            | 1763.43            | 2.869                          | 858.88             | 2464.22            |
| A_68_P23599469 | chr5:35623311-35623355                            | NM_007418:2118         | Adra2c        | INSIDE                 | 1.659                                                        | 5.317                          | 1510.31            | 8030.19            | 8.822                          | 1307.97            | 11539.39           |
| A_68_P20148721 | chr1:36569446-36569490                            | NM_001039551:748       | Cnmm3         | INSIDE                 | 1.659                                                        | 5.939                          | 2091.84            | 12424.11           | 9.855                          | 1726.52            | 17014.04           |
| A_68_P27285229 | chr10:80217921-80217965                           | NM_199322:-8           | Dot11         | PROMOTER               | 1.659                                                        | 2.909                          | 2296.28            | 6680.22            | 4.825                          | 1829.74            | 8828.72            |
| A_68_P30585939 | chr16:20098297-20098341                           | NM_029436:692          | Klhl24        | INSIDE                 | 1.659                                                        | 2.204                          | 1057.99            | 2331.82            | 3.656                          | 989.42             | 3617.73            |
| A_68_P22826133 | chr4:33397493-33397537                            | NM_011884:229          | Rnggt         | INSIDE                 | 1.659                                                        | 2.930                          | 1834.42            | 5374.19            | 4.859                          | 1525.29            | 7411.58            |
| A_68_P29648696 | chr14:61791453-61791497                           | NM_172809:34181        | Sacs          | INSIDE                 | 1.659                                                        | 3.057                          | 914.38             | 2795.69            | 5.073                          | 777.56             | 3944.66            |
| A_68_P28765899 | chr12:117316302-117316346                         | NM_009511:129          | Vipr2         | INSIDE                 | 1.659                                                        | 1.819                          | 1316.78            | 2395.76            | 3.018                          | 1029.57            | 3107.40            |
| A_68_P27995284 | chr11:87452873-87452917                           | NM_001045527:22229     | Hsf5          | INSIDE                 | 1.658                                                        | 5.403                          | 2219.32            | 11991.18           | 8.961                          | 1829.83            | 16397.01           |
| A_68_P24288408 | chr6:21900000-21900044                            | NM_023626:408          | Ing3          | INSIDE                 | 1.658                                                        | 3.477                          | 6884.72            | 23938.05           | 5.766                          | 4668.75            | 26919.52           |
| A_68_P21722727 | chr2:147009567-147009611                          | NR_030769:-230         | Nkx2-2as      | PROMOTER               | 1.658                                                        | 4.164                          | 378.14             | 1574.57            | 6.904                          | 306.78             | 2117.92            |
| A_68_P30346619 | chr15:76012289-76012333                           | NM_201394:13830        | Plec          | INSIDE                 | 1.658                                                        | 5.461                          | 1257.05            | 6864.84            | 9.055                          | 1034.03            | 9363.44            |
| A_68_P30346599 | chr15:76009927-76009971                           | NM_201394:16192        | Plec          | INSIDE                 | 1.658                                                        | 4.838                          | 1926.06            | 9318.28            | 8.023                          | 1489.19            | 11947.43           |
| A_68_P22883653 | chr4:45543529-45543573                            | NM_001033306:150       | Shb           | INSIDE                 | 1.658                                                        | 3.819                          | 859.99             | 3284.17            | 6.333                          | 816.57             | 5171.07            |
| A_68_P22614372 | chr3:146067861-146067905                          | NM_138744:232          | Ssx2ip        | INSIDE                 | 1.658                                                        | 6.185                          | 795.13             | 4917.62            | 10.254                         | 736.50             | 7552.35            |
| A_68_P27846979 | chr11:60988330-60988374                           | NM_001004143:209       | Usp22         | INSIDE                 | 1.658                                                        | 2.382                          | 587.13             | 1398.64            | 3.949                          | 512.90             | 2025.31            |
| A_68_P23938671 | chr5:102499208-102499252                          | NM_172882:-290         | Wdfy3         | PROMOTER               | 1.658                                                        | 3.288                          | 855.64             | 2813.62            | 5.451                          | 689.08             | 3756.44            |
| A_68_P29678557 | chr14:66916156-66916200                           | NR_038077:-212         | 1700001G11Rik | PROMOTER               | 1.657                                                        | 1.394                          | 1033.06            | 1440.07            | 2.311                          | 793.29             | 1832.91            |
| A_68_P31108897 | chr17:26337756-26337800                           | NM_008113:517          | Arhgdig       | INSIDE                 | 1.657                                                        | 6.939                          | 5809.01            | 40307.93           | 11.500                         | 4304.82            | 49505.05           |
| A_68_P27476528 | chr10:116018983-116019029                         | NM_001037846:-439      | Cnot2         | PROMOTER               | 1.657                                                        | 3.208                          | 4435.27            | 14229.05           | 5.315                          | 3475.66            | 18474.40           |
| A_68_P26590184 | chr9:65757067-65757111                            | NM_173185:272          | Csnk1g1       | INSIDE                 | 1.657                                                        | 7.170                          | 2904.33            | 20822.79           | 11.882                         | 2120.45            | 25195.40           |
| A_68_P22388169 | chr3:103613288-103613332                          | NM_001025312:0         | Delc1b        | INSIDE                 | 1.657                                                        | 8.165                          | 1708.03            | 13946.79           | 13.526                         | 1349.17            | 18249.39           |
| A_68_P28976807 | chr13:41315714-41315758                           | NM_019423:36           | Elov12        | INSIDE                 | 1.657                                                        | 0.384                          | 1063.81            | 408.94             | 0.637                          | 991.98             | 632.02             |
| A_68_P26394905 | chr9:30234659-30234703                            | NM_028874:-233         | Snx19         | PROMOTER               | 1.657                                                        | 1.766                          | 790.61             | 1396.01            | 2.926                          | 755.39             | 2210.60            |
| A_68_P23320096 | chr4:133467057-133467101                          | AK015234:372           |               | INSIDE                 | 1.657                                                        | 1.740                          | 1508.28            | 2624.10            | 2.883                          | 1292.84            | 3727.63            |
| A_68_P29102524 | chr13:65361174-65361218                           | ENSMUST00000099425:350 |               | INSIDE                 | 1.657                                                        | 3.466                          | 742.09             | 2572.19            | 5.744                          | 727.94             | 4181.38            |
| A_68_P24084071 | chr5:129106177-129106221                          | NR_015517:364          | 5930412G12Rik | INSIDE                 | 1.656                                                        | 2.695                          | 2040.71            | 5500.05            | 4.464                          | 1575.31            | 7032.18            |
| A_68_P20796835 | chr1:167775162-167775206                          | NM_001113391:56373     | Cd247         | INSIDE                 | 1.656                                                        | 3.749                          | 1229.47            | 4609.55            | 6.210                          | 1193.88            | 7414.07            |
| A_68_P30478193 | chr15:98924227-98924271                           | NM_176835:-5666        | Dnajc22       | DIVERGENT_PROMOTER     | 1.656                                                        | 4.130                          | 5541.49            | 22886.39           | 6.838                          | 4719.82            | 32273.13           |
| A_68_P28058704 | chr11:98671394-98671438                           | NR_033551:-13          | Gm12359       | PROMOTER               | 1.656                                                        | 3.705                          | 8276.45            | 30660.92           | 6.135                          | 6485.89            | 39792.04           |
| A_68_P27840800 | chr11:59918733-59918777                           | NM_009021:240          | Rai1          | INSIDE                 | 1.656                                                        | 3.280                          | 677.65             | 2222.45            | 5.431                          | 517.12             | 2808.25            |
| A_68_P31208271 | chr17:46811147-46811191                           | NM_144857:36           | Rrp36         | INSIDE                 | 1.656                                                        | 2.295                          | 5152.14            | 11824.65           | 3.800                          | 3977.79            | 15116.76           |
| A_68_P24691294 | chr6:100237868-100237912                          | NM_019743:-538         | Rybp          | PROMOTER               | 1.656                                                        | 3.440                          | 658.40             | 2264.60            | 5.697                          | 567.63             | 3233.73            |
| A_68_P25507562 | chr7:134967999-134968043                          | NM_024414:25           | Stx1b         | INSIDE                 | 1.656                                                        | 2.692                          | 6088.86            | 16388.52           | 4.459                          | 4698.34            | 20947.61           |
| A_68_P31982219 | chr19:16855558-16855602                           | NM_173028:-163         | Vps13a        | PROMOTER               | 1.656                                                        | 3.918                          | 1634.12            | 6403.20            | 6.488                          | 1341.32            | 8703.07            |
| A_68_P31479231 | chr18:7869684-7869728                             | NM_001146298:512       | Wac           | INSIDE                 | 1.656                                                        | 2.321                          | 1157.71            | 2686.65            | 3.844                          | 944.48             | 3630.44            |
| A_68_P22903296 | chr4:49072520-49072564                            | NM_178756:209          | E130309F12Rik | INSIDE                 | 1.655                                                        | 1.726                          | 2128.61            | 3672.93            | 2.856                          | 1666.20            | 4758.16            |
| A_68_P30596432 | chr16:22162719-22162763                           | NM_183029:632          | Igf2bp2       | INSIDE                 | 1.655                                                        | 5.012                          | 979.30             | 4907.86            | 8.295                          | 862.69             | 7155.78            |
| A_68_P28452657 | chr12:56700590-56700634                           | NM_020287:709          | Insm2         | INSIDE                 | 1.655                                                        | 9.081                          | 1368.34            | 12425.99           | 15.026                         | 1009.74            | 15172.08           |
| A_68_P21100497 | chr2:29820983-29821027                            | NM_001076554:-75       | Spna2         | PROMOTER               | 1.655                                                        | 1.873                          | 8262.90            | 15476.18           | 3.100                          | 6187.29            | 19181.71           |
| A_68_P23742487 | chr5:63157563-63157607                            | NM_178407:-168         | Arap2         | PROMOTER               | 1.654                                                        | 4.428                          | 1093.37            | 4841.67            | 7.324                          | 873.88             | 6400.40            |
| A_68_P26128337 | chr8:106919324-106919368                          | NM_153582:250          | Cmtm4         | INSIDE                 | 1.654                                                        | 6.030                          | 3389.72            | 20441.46           | 9.976                          | 2593.04            | 25869.13           |
| A_68_P22610589 | chr3:145421770-145421814                          | NM_026993:137          | Ddah1         | INSIDE                 | 1.654                                                        | 3.326                          | 2381.64            | 7920.16            | 5.501                          | 1933.39            | 10634.74           |
| A_68_P27041764 | chr10:30562697-30562741                           | NM_013904:-129         | Hey2          | PROMOTER               | 1.654                                                        | 2.910                          | 517.85             | 1506.71            | 4.812                          | 446.11             | 2146.52            |
| A_68_P25953471 | chr8:73223632-73223676                            | NM_010592:2017         | Jund          | INSIDE                 | 1.654                                                        | 4.674                          | 1216.41            | 5685.67            | 7.731                          | 1052.44            | 8136.16            |
| A_68_P26920438 | chr10:7445673-7445717                             | NM_011835:-103         | Katna1        | PROMOTER               | 1.654                                                        | 1.716                          | 3575.01            | 6133.04            | 2.837                          | 2711.27            | 7691.58            |
| A_68_P23334085 | chr4:136025641-136025685                          | NM_024452:-13          | Luzp1         | PROMOTER               | 1.654                                                        | 5.706                          | 10787.59           | 61551.52           | 9.440                          | 7883.57            | 74420.85           |
| A_68_P28077571 | chr11:101968496-101968540                         | NM_145435:572          | Pyy           | INSIDE                 | 1.654                                                        | 8.867                          | 1245.68            | 11045.37           | 14.664                         | 1014.87            | 14881.73           |
| A_68_P28054168 | chr11:97913868-97913912                           | NM_146028:886          | Stac2         | INSIDE                 | 1.654                                                        | 2.484                          | 8806.47            | 21877.27           | 4.109                          | 6437.64            | 26455.20           |
| A_68_P25011349 | chr7:26474463-26474507                            | NM_011577:2464         | Tgfb1         | INSIDE                 | 1.654                                                        | 4.639                          | 1133.34            | 5257.87            | 7.675                          | 964.32             | 7401.22            |
| A_68_P20936911 | chr1:193048707-193048751                          | ENSMUST00000139056:376 |               | INSIDE                 | 1.654                                                        | 1.704                          | 1637.26            | 2789.55            | 2.819                          | 1242.74            | 3502.78            |

| ProbeName      | Target position of probe on CpG island microarray | TargetID           | GeneSymbol    | CpG island Description | Ratio of relative methylation (TiO <sub>2</sub> -NP/Vehicle) | Sham group                     |                    |                    | TiO <sub>2</sub> -H group      |                    |                    |
|----------------|---------------------------------------------------|--------------------|---------------|------------------------|--------------------------------------------------------------|--------------------------------|--------------------|--------------------|--------------------------------|--------------------|--------------------|
|                |                                                   |                    |               |                        |                                                              | Relative methylation (Cy5/Cy3) | Cy3 signal (Input) | Cy5 signal (MeDIP) | Relative methylation (Cy5/Cy3) | Cy3 signal (Input) | Cy5 signal (MeDIP) |
| A_68_P28330749 | chr12:32035950-32035994                           | NM_007861:330      | Did           | INSIDE                 | 1.653                                                        | 4.600                          | 1536.04            | 7066.43            | 7.607                          | 1242.80            | 9453.52            |
| A_68_P26350216 | chr9:21855292-21855336                            | NM_010487:1153     | Elavl3        | INSIDE                 | 1.653                                                        | 2.648                          | 559.24             | 1480.63            | 4.377                          | 446.60             | 1954.97            |
| A_68_P23896964 | chr5:93370721-93370767                            | NM_001077596:43721 | Shroom3       | INSIDE                 | 1.653                                                        | 2.044                          | 393.57             | 804.42             | 3.378                          | 328.44             | 1109.39            |
| A_68_P22236489 | chr3:72861536-72861580                            | NM_198864:-693     | Slitrk3       | PROMOTER               | 1.653                                                        | 2.647                          | 8475.59            | 22433.80           | 4.376                          | 6429.11            | 28135.05           |
| A_68_P22185881 | chr3:61963288-61963332                            |                    |               | Unknown                | 1.653                                                        | 6.500                          | 1617.67            | 10514.98           | 10.745                         | 1247.80            | 13407.95           |
| A_68_P30387964 | chr15:83197665-83197709                           | NR_027980:41       | 1700001L05Rik | INSIDE                 | 1.652                                                        | 4.523                          | 7085.74            | 32046.29           | 7.470                          | 5107.02            | 38149.22           |
| A_68_P23342100 | chr4:137351824-137351868                          | NM_007431:446      | Alpl          | INSIDE                 | 1.652                                                        | 2.796                          | 617.01             | 1725.19            | 4.619                          | 533.23             | 2463.21            |
| A_68_P25712956 | chr8:23916111-23916155                            | NM_001122820:-6    | Ap3m2         | PROMOTER               | 1.652                                                        | 4.125                          | 3610.71            | 14895.53           | 6.816                          | 2789.42            | 19011.75           |
| A_68_P31602497 | chr18:32537058-32537102                           | NM_001083334:210   | Bin1          | INSIDE                 | 1.652                                                        | 1.753                          | 1699.03            | 2977.56            | 2.895                          | 1814.24            | 5252.63            |
| A_68_P21748226 | chr2:152053141-152053185                          | NM_007788:587      | Csnk2a1       | INSIDE                 | 1.652                                                        | 3.954                          | 3066.05            | 12123.17           | 6.533                          | 2172.35            | 14191.76           |
| A_68_P29334871 | chr13:113254322-113254366                         | NM_010560:67       | Il6st         | INSIDE                 | 1.652                                                        | 5.429                          | 2889.77            | 15688.11           | 8.970                          | 2431.44            | 21808.93           |
| A_68_P31086236 | chr17:21626256-21626300                           | NM_013843:327      | Zfp53         | INSIDE                 | 1.652                                                        | 1.868                          | 1741.74            | 3253.80            | 3.086                          | 1520.40            | 4691.44            |
| A_68_P28743717 | chr12:112615357-112615401                         | NM_183016:551      | Cdc42bbp      | INSIDE                 | 1.651                                                        | 11.373                         | 1430.70            | 16271.87           | 18.774                         | 1094.42            | 20546.89           |
| A_68_P21425775 | chr2:91815556-91815600                            | NM_011957:48749    | Creb3l1       | DOWNSTREAM             | 1.651                                                        | 2.114                          | 1190.64            | 2516.90            | 3.490                          | 1000.79            | 3492.82            |
| A_68_P28920307 | chr13:31065636-31065680                           | NM_025588:258      | Exoc2         | INSIDE                 | 1.651                                                        | 1.876                          | 3310.55            | 6212.09            | 3.098                          | 2322.28            | 7193.72            |
| A_68_P25678282 | chr8:15027507-15027551                            | NM_029116:16504    | Kbtbd11       | INSIDE                 | 1.651                                                        | 3.122                          | 764.09             | 2385.72            | 5.154                          | 619.63             | 3193.55            |
| A_68_P27898214 | chr11:69779823-69779867                           | NM_016887:922      | Cldn7         | INSIDE                 | 1.650                                                        | 3.957                          | 1568.10            | 6205.57            | 6.530                          | 1333.22            | 8705.40            |
| A_68_P28158619 | chr11:116168104-116168148                         | NM_001162872:-74   | Exoc7         | PROMOTER               | 1.650                                                        | 3.395                          | 574.55             | 1950.42            | 5.602                          | 532.83             | 2984.86            |
| A_68_P30093918 | chr15:27611330-27611374                           | NM_198301:-99      | Fam105a       | PROMOTER               | 1.650                                                        | 2.064                          | 569.45             | 1175.50            | 3.407                          | 609.04             | 2074.72            |
| A_68_P29248566 | chr13:97695211-97695255                           | NM_001166065:589   | Gen4          | INSIDE                 | 1.650                                                        | 2.718                          | 538.77             | 1464.12            | 4.484                          | 429.38             | 1925.19            |
| A_68_P21417960 | chr2:90420716-90420760                            | NM_008982:66       | Ptpnj         | INSIDE                 | 1.650                                                        | 4.856                          | 1179.17            | 5726.52            | 8.015                          | 976.27             | 7824.66            |
| A_68_P24039805 | chr5:121062634-121062678                          | NM_029096:-58      | 1110008J03Rik | DIVERGENT_PROMOTER     | 1.649                                                        | 3.998                          | 7528.67            | 30096.70           | 6.591                          | 5424.59            | 35755.07           |
| A_68_P22552055 | chr3:135101078-135101122                          | NR_030689:529      | 4930539J05Rik | INSIDE                 | 1.649                                                        | 3.525                          | 946.20             | 3335.59            | 5.813                          | 843.84             | 4905.36            |
| A_68_P30533736 | chr16:8672646-8672705                             | NM_025821:-429     | Carhsp1       | PROMOTER               | 1.649                                                        | 9.979                          | 1344.51            | 13416.96           | 16.451                         | 1050.57            | 17282.81           |
| A_68_P25951144 | chr8:72854849-72854893                            | NM_008107:1207     | Gdf1          | INSIDE                 | 1.649                                                        | 4.300                          | 551.65             | 2372.07            | 7.090                          | 441.95             | 3133.45            |
| A_68_P24632571 | chr6:90413720-90413764                            | NM_023184:1123     | Klf15         | INSIDE                 | 1.649                                                        | 4.076                          | 1932.73            | 7877.24            | 6.721                          | 1466.57            | 9856.49            |
| A_68_P31150250 | chr17:33855758-33855802                           | NM_145486:-165     | Marchf2       | PROMOTER               | 1.649                                                        | 2.933                          | 2568.68            | 7532.69            | 4.837                          | 2197.27            | 10627.10           |
| A_68_P20642551 | chr1:137815771-137815815                          | NM_019645:-191     | Pkp1          | PROMOTER               | 1.649                                                        | 2.439                          | 2311.39            | 5636.91            | 4.021                          | 1869.14            | 7515.51            |
| A_68_P25458297 | chr7:125591038-125591082                          | NM_138649:-3994    | Syt17         | PROMOTER               | 1.649                                                        | 2.016                          | 354.57             | 714.92             | 3.324                          | 307.88             | 1023.45            |
| A_68_P24358614 | chr6:34860895-34860939                            | NM_001013366:-85   | Wdr91         | PROMOTER               | 1.649                                                        | 1.524                          | 6329.07            | 9643.26            | 2.512                          | 4657.72            | 11699.40           |
| A_68_P22222507 | chr3:69525834-69525878                            | NM_133787:-120     | Nmd3          | PROMOTER               | 1.648                                                        | 3.869                          | 13203.19           | 51078.09           | 6.375                          | 9180.51            | 58524.52           |
| A_68_P25021894 | chr7:29221444-29221488                            | NM_175021:-256     | Samd4b        | DIVERGENT_PROMOTER     | 1.648                                                        | 4.085                          | 2074.50            | 8475.26            | 6.732                          | 1684.39            | 11340.10           |
| A_68_P29514238 | chr14:32643908-32643952                           | NM_001024604:-329  | Ankrd28       | PROMOTER               | 1.647                                                        | 1.620                          | 1147.20            | 1858.23            | 2.668                          | 1038.20            | 2770.24            |
| A_68_P25833746 | chr8:47085665-47085709                            | NM_001039562:-482  | Ankrd37       | PROMOTER               | 1.647                                                        | 2.622                          | 3555.23            | 9320.60            | 4.318                          | 2681.01            | 11575.77           |
| A_68_P32463052 | chrX:70748623-70748667                            | NM_177236:220      | Atp2b3        | INSIDE                 | 1.647                                                        | 2.172                          | 401.11             | 871.38             | 3.578                          | 214.89             | 768.83             |
| A_68_P26659378 | chr9:78243891-78243935                            | NM_001191044:329   | Ddx43         | INSIDE                 | 1.647                                                        | 3.794                          | 1438.91            | 5459.07            | 6.249                          | 1300.98            | 8129.60            |
| A_68_P26802905 | chr9:106270040-106270084                          | NM_153459:-900     | Dusp7         | PROMOTER               | 1.647                                                        | 5.814                          | 8987.36            | 52249.22           | 9.574                          | 6248.62            | 59827.29           |
| A_68_P23261233 | chr4:122866390-122866434                          | NM_174998:5666     | Hpeal4        | INSIDE                 | 1.647                                                        | 2.404                          | 598.81             | 1439.31            | 3.959                          | 475.29             | 1881.44            |
| A_68_P23269516 | chr4:124335391-124335435                          | NM_011141:524      | Pou3f1        | INSIDE                 | 1.647                                                        | 4.999                          | 1869.29            | 9344.93            | 8.232                          | 1390.95            | 11450.48           |
| A_68_P30250719 | chr15:58720548-58720592                           | NM_175226:-213     | Rnf139        | PROMOTER               | 1.647                                                        | 4.295                          | 875.77             | 3761.37            | 7.074                          | 754.23             | 5335.61            |
| A_68_P29664626 | chr14:64562881-64562925                           | NM_011446:360      | Sox7          | INSIDE                 | 1.647                                                        | 2.929                          | 1685.38            | 4936.40            | 4.824                          | 1370.78            | 6612.59            |
| A_68_P23364697 | chr4:141101930-141101974                          | NR_030695:-124     | B330016D10Rik | DIVERGENT_PROMOTER     | 1.646                                                        | 2.241                          | 420.61             | 942.55             | 3.689                          | 394.23             | 1454.27            |
| A_68_P26543678 | chr9:57612898-57612942                            | NM_007713:747      | Clik3         | INSIDE                 | 1.646                                                        | 2.204                          | 5441.20            | 11992.11           | 3.627                          | 4191.60            | 15201.53           |
| A_68_P31862858 | chr18:80389262-80389306                           | NM_199197:8074     | Rbfa          | INSIDE                 | 1.646                                                        | 1.852                          | 375.68             | 695.88             | 3.049                          | 324.99             | 990.77             |
| A_68_P28082450 | chr11:102809915-102809959                         | NM_011795:-2161    | C1ql1         | PROMOTER               | 1.645                                                        | 1.681                          | 2048.14            | 3443.75            | 2.766                          | 1791.43            | 4955.48            |
| A_68_P21315049 | chr2:70499932-70499976                            | NM_027352:389      | Gorasp2       | INSIDE                 | 1.645                                                        | 3.840                          | 509.53             | 1956.67            | 6.318                          | 440.59             | 2783.49            |
| A_68_P22518659 | chr3:128907292-128907336                          | NM_001042502:-9540 | Pitx2         | PROMOTER               | 1.645                                                        | 3.010                          | 1668.95            | 5023.52            | 4.951                          | 1335.15            | 6610.53            |
| A_68_P28523569 | chr12:72069499-72069543                           | NM_011184:-6089    | Pσμα3         | PROMOTER               | 1.645                                                        | 2.378                          | 192.91             | 458.66             | 3.912                          | 164.85             | 644.90             |
| A_68_P21071033 | chr2:25127873-25127917                            | NM_023464:44       | Ssna1         | INSIDE                 | 1.645                                                        | 2.674                          | 2235.25            | 5976.17            | 4.398                          | 1902.58            | 8367.84            |
| A_68_P31479228 | chr18:7869362-7869406                             | NM_001146298:190   | Wac           | INSIDE                 | 1.645                                                        | 2.198                          | 2696.63            | 5927.22            | 3.616                          | 2065.93            | 7469.93            |
| A_68_P29657349 | A_68_P29657349                                    |                    |               | Unknown                | 1.645                                                        | 3.129                          | 1783.91            | 5581.20            | 5.148                          | 1297.42            | 6679.07            |



| ProbeName      | Target position of probe on CpG island microarray | TargetID                | GeneSymbol    | CpG island Description | Ratio of relative methylation (TiO <sub>2</sub> -NP/Vehicle) | Sham group                     |                    |                    | TiO <sub>2</sub> -H group      |                    |                    |
|----------------|---------------------------------------------------|-------------------------|---------------|------------------------|--------------------------------------------------------------|--------------------------------|--------------------|--------------------|--------------------------------|--------------------|--------------------|
|                |                                                   |                         |               |                        |                                                              | Relative methylation (Cy5/Cy3) | Cy3 signal (Input) | Cy5 signal (MeDIP) | Relative methylation (Cy5/Cy3) | Cy3 signal (Input) | Cy5 signal (MeDIP) |
| A_68_P30997386 | chr16:97392403-97392447                           | NM_031174:-82           | Dscam         | PROMOTER               | 1.644                                                        | 1.595                          | 480.90             | 766.97             | 2.622                          | 482.13             | 1264.18            |
| A_68_P25609686 | chr7:152047482-152047526                          | NM_010202:214           | Fgf4          | INSIDE                 | 1.644                                                        | 5.163                          | 1113.15            | 5747.23            | 8.487                          | 946.39             | 8032.38            |
| A_68_P25091451 | chr7:52409634-52409678                            | NM_029406:-111          | Pih1d1        | PROMOTER               | 1.644                                                        | 2.322                          | 1695.68            | 3936.97            | 3.817                          | 1344.88            | 5133.11            |
| A_68_P23318413 | chr4:133155649-133155693                          | NM_018754:2413          | Sfn           | DOWNSTREAM             | 1.644                                                        | 1.623                          | 1136.06            | 1843.39            | 2.668                          | 943.40             | 2516.70            |
| A_68_P27942762 | chr11:78157060-78157104                           | NM_011676:59            | Unc119        | INSIDE                 | 1.644                                                        | 4.324                          | 5863.68            | 25357.28           | 7.109                          | 4592.37            | 32645.92           |
| A_68_P23249523 | chr4:119821508-119821552                          |                         |               | Unknown                | 1.644                                                        | 2.927                          | 1297.96            | 3798.79            | 4.811                          | 1073.75            | 5165.37            |
| A_68_P26170843 | chr8:114434234-114434278                          | NM_019950:-157          | Chst5         | PROMOTER               | 1.643                                                        | 2.517                          | 1320.48            | 3323.84            | 4.136                          | 1058.06            | 4375.93            |
| A_68_P28058844 | chr11:98698263-98698307                           | NM_001080925:186        | Rapgef1l      | INSIDE                 | 1.643                                                        | 2.311                          | 1746.35            | 4035.94            | 3.797                          | 1653.93            | 6279.52            |
| A_68_P20821183 | chr1:172145120-172145164                          | NM_010633:382           | Uhmk1         | INSIDE                 | 1.643                                                        | 1.951                          | 1817.60            | 3545.33            | 3.204                          | 1568.10            | 5024.87            |
| A_68_P24992404 | chr7:19857862-19857906                            | NM_009499:-681          | Vasp          | PROMOTER               | 1.643                                                        | 1.942                          | 3920.49            | 7612.56            | 3.190                          | 3319.71            | 10591.52           |
| A_68_P24063275 | chr5:125343770-125343814                          | NM_001081750:718        | Zfp664        | INSIDE                 | 1.643                                                        | 3.056                          | 2191.66            | 6698.03            | 5.021                          | 1670.90            | 8389.72            |
| A_68_P32265732 | chrX:12859122-12859166                            | NM_010028:997           | Ddx3x         | INSIDE                 | 1.642                                                        | 2.048                          | 627.54             | 1285.32            | 3.363                          | 607.86             | 2043.95            |
| A_68_P23323339 | chr4:134091201-134091245                          | NM_029759:-2555         | Fam54b        | PROMOTER               | 1.642                                                        | 2.789                          | 1422.20            | 3966.22            | 4.578                          | 1228.16            | 5622.49            |
| A_68_P31857885 | chr18:79306491-79306535                           | NM_053099:-382          | Setbp1        | PROMOTER               | 1.642                                                        | 3.094                          | 1006.69            | 3114.38            | 5.081                          | 841.53             | 4275.84            |
| A_68_P30436288 | chr15:91403683-91403727                           | NM_001033633:-12        | Ste2a13       | PROMOTER               | 1.642                                                        | 1.669                          | 457.19             | 762.82             | 2.740                          | 420.44             | 1152.03            |
| A_68_P27942521 | chr11:78115275-78115319                           | NM_017407:204           | Spag5         | INSIDE                 | 1.642                                                        | 5.783                          | 1791.57            | 10361.45           | 9.494                          | 1481.68            | 14067.16           |
| A_68_P25017009 | chr7:28160497-28160541                            | NM_001199235:19007      | Spnb4         | INSIDE                 | 1.642                                                        | 2.209                          | 3530.92            | 7801.52            | 3.628                          | 3013.58            | 10934.32           |
| A_68_P30378284 | chr15:81353498-81353542                           |                         |               | Unknown                | 1.642                                                        | 1.558                          | 675.50             | 1052.36            | 2.557                          | 654.93             | 1674.93            |
| A_68_P23323199 | chr4:134066870-134066914                          | NM_001081099:-21        | 2610002D18Rik | PROMOTER               | 1.641                                                        | 3.069                          | 2082.85            | 6392.84            | 5.036                          | 1674.79            | 8433.89            |
| A_68_P26080249 | chr8:97441876-97441920                            | NM_001033533:100        | Ccdc102a      | INSIDE                 | 1.641                                                        | 1.764                          | 2006.98            | 3540.67            | 2.895                          | 1603.92            | 4644.14            |
| A_68_P26350213 | chr9:21855003-21855047                            | NM_010487:1443          | Elavl3        | INSIDE                 | 1.641                                                        | 3.509                          | 2235.93            | 7845.85            | 5.757                          | 1856.32            | 10686.97           |
| A_68_P29713891 | chr14:73109647-73109691                           | NM_207636:142           | Fndc3a        | INSIDE                 | 1.641                                                        | 3.333                          | 1249.16            | 4163.45            | 5.469                          | 1056.14            | 5776.46            |
| A_68_P26762516 | chr9:99040770-99040814                            | NM_029094:-162          | Pik3cb        | PROMOTER               | 1.641                                                        | 2.485                          | 1822.34            | 4528.06            | 4.078                          | 1394.74            | 5688.22            |
| A_68_P24020335 | chr5:117838986-117839030                          | NM_028128:24            | Rfc5          | INSIDE                 | 1.641                                                        | 4.483                          | 893.29             | 4004.39            | 7.355                          | 861.69             | 6337.96            |
| A_68_P28956729 | chr13:37918014-37918058                           | NM_001177868:-744       | Rreb1         | PROMOTER               | 1.641                                                        | 2.736                          | 2349.87            | 6428.20            | 4.490                          | 1779.07            | 7988.06            |
| A_68_P30381701 | chr15:81977690-81977734                           | NM_033218:14            | Sreb2         | INSIDE                 | 1.641                                                        | 2.567                          | 7370.16            | 18917.36           | 4.213                          | 5529.92            | 23299.25           |
| A_68_P30601919 | chr16:23225265-23225309                           | NM_145933:452           | St6gal1       | INSIDE                 | 1.641                                                        | 2.234                          | 1424.73            | 3183.27            | 3.666                          | 1177.58            | 4317.57            |
| A_68_P21485725 | chr2:103659783-103659827                          | ENSMUST00000167989:-171 |               | PROMOTER               | 1.641                                                        | 5.057                          | 2260.32            | 11430.58           | 8.297                          | 1657.10            | 13748.53           |
| A_68_P27010234 | chr10:24431792-24431836                           | NM_008813:94            | Enpp1         | INSIDE                 | 1.640                                                        | 6.266                          | 2456.72            | 15393.62           | 10.275                         | 2001.34            | 20564.38           |
| A_68_P20939662 | chr1:193541860-193541904                          | NM_172266:-20           | Lpgat1        | PROMOTER               | 1.640                                                        | 2.460                          | 919.65             | 2262.45            | 4.034                          | 770.36             | 3107.48            |
| A_68_P22568795 | chr3:138105955-138105999                          | NM_007410:-151          | Adh5          | PROMOTER               | 1.639                                                        | 2.652                          | 6487.11            | 17202.67           | 4.345                          | 5103.16            | 22173.81           |
| A_68_P32538582 | chrX:91612233-91612277                            | NM_026673:-194          | Apoo          | PROMOTER               | 1.639                                                        | 2.182                          | 678.97             | 1481.54            | 3.577                          | 327.86             | 1172.65            |
| A_68_P26630618 | chr9:72833442-72833486                            | NM_001114328:107        | Ccpg1         | INSIDE                 | 1.639                                                        | 1.961                          | 1956.95            | 3838.33            | 3.215                          | 1718.91            | 5526.45            |
| A_68_P30621546 | chr16:26581967-26582011                           | NM_134103:198           | Il1rap        | INSIDE                 | 1.639                                                        | 5.035                          | 2098.47            | 10565.95           | 8.251                          | 1560.42            | 12874.40           |
| A_68_P24132963 | chr5:139469932-139469976                          | NM_008808:953           | Pdgfa         | INSIDE                 | 1.639                                                        | 2.663                          | 4001.13            | 10655.82           | 4.365                          | 3144.04            | 13724.14           |
| A_68_P21909031 | chr2:180921876-180921920                          | NM_025598:-149          | Ppdpf         | PROMOTER               | 1.639                                                        | 1.741                          | 1516.43            | 2640.73            | 2.853                          | 1252.05            | 3572.49            |
| A_68_P24086565 | chr5:129526623-129526667                          | NM_009391:614           | Ran           | INSIDE                 | 1.639                                                        | 2.574                          | 1550.69            | 3991.92            | 4.220                          | 1358.16            | 5731.75            |
| A_68_P29715887 | chr14:73543290-73543334                           | NR_033185:721           | Rebtb2        | INSIDE                 | 1.639                                                        | 1.870                          | 715.43             | 1337.52            | 3.064                          | 603.19             | 1848.33            |
| A_68_P25232267 | chr7:81158422-81158466                            | NM_009181:124           | St8sia2       | INSIDE                 | 1.639                                                        | 4.897                          | 579.54             | 2837.93            | 8.027                          | 450.86             | 3618.93            |
| A_68_P22650336 | chr3:152058904-152058948                          | NM_001080755:-47        | Zzz3          | PROMOTER               | 1.639                                                        | 2.012                          | 590.54             | 1188.06            | 3.298                          | 679.08             | 2239.34            |
| A_68_P21747321 | chr2:151874396-151874440                          |                         |               | Unknown                | 1.639                                                        | 8.573                          | 1419.06            | 12165.45           | 14.053                         | 1112.80            | 15637.85           |
| A_68_P20633260 | chr1:136311773-136311817                          | NM_028320:-249          | Adipor1       | PROMOTER               | 1.638                                                        | 1.899                          | 1917.94            | 3642.07            | 3.110                          | 1678.68            | 5221.19            |
| A_68_P29187496 | chr13:83860499-83860543                           | NR_015561:-7190         | C130071C03Rik | PROMOTER               | 1.638                                                        | 4.605                          | 1216.96            | 5604.25            | 7.543                          | 1022.94            | 7716.25            |
| A_68_P27937736 | chr11:77281473-77281517                           | NM_139128:4080          | Coro6         | INSIDE                 | 1.638                                                        | 1.704                          | 1225.08            | 2087.69            | 2.791                          | 1035.13            | 2889.33            |
| A_68_P20146150 | chr1:36125563-36125607                            | NM_015818:340           | Hs6st1        | INSIDE                 | 1.638                                                        | 4.027                          | 2473.98            | 9963.62            | 6.599                          | 2193.65            | 14474.81           |
| A_68_P23156220 | chr4:101320226-101320270                          | NM_175036:-139          | Leprot        | PROMOTER               | 1.638                                                        | 1.858                          | 6413.77            | 11913.85           | 3.042                          | 4740.97            | 14421.47           |
| A_68_P25261466 | chr7:86650289-86650333                            | NR_029818:161           | Mir9-3        | DOWNSTREAM             | 1.638                                                        | 2.324                          | 2376.34            | 5523.69            | 3.807                          | 2028.31            | 7722.67            |
| A_68_P21494379 | chr2:105239336-105239380                          | NM_009037:118           | Rcn1          | INSIDE                 | 1.638                                                        | 3.821                          | 510.90             | 1194.90            | 3.831                          | 450.73             | 1726.56            |
| A_68_P21086006 | chr2:27533318-27533362                            | NM_011305:620           | Rxra          | INSIDE                 | 1.638                                                        | 3.240                          | 1257.40            | 4074.37            | 5.307                          | 1004.52            | 5331.24            |
| A_68_P23896971 | chr5:93371578-93371622                            | NM_001077596:44577      | Shroom3       | INSIDE                 | 1.638                                                        | 2.786                          | 519.73             | 1447.84            | 4.563                          | 449.18             | 2049.51            |
| A_68_P28615267 | chr12:88640639-88640683                           | NM_011479:88520         | Sptlc2        | DOWNSTREAM             | 1.638                                                        | 3.014                          | 654.26             | 1971.91            | 4.938                          | 576.68             | 2847.47            |

| ProbeName      | Target position of probe on CpG island microarray | TargetID                 | GeneSymbol    | CpG island Description | Ratio of relative methylation (TiO <sub>2</sub> -NP/Vehicle) | Sham group                     |                    |                    | TiO <sub>2</sub> -H group      |                    |                    |
|----------------|---------------------------------------------------|--------------------------|---------------|------------------------|--------------------------------------------------------------|--------------------------------|--------------------|--------------------|--------------------------------|--------------------|--------------------|
|                |                                                   |                          |               |                        |                                                              | Relative methylation (Cy5/Cy3) | Cy3 signal (Input) | Cy5 signal (MeDIP) | Relative methylation (Cy5/Cy3) | Cy3 signal (Input) | Cy5 signal (MeDIP) |
| A_68_P28688783 | chr12:103213937-103213981                         | NM_016856:-225           | Cpsf2         | PROMOTER               | 1.637                                                        | 2.923                          | 1412.05            | 4127.22            | 4.784                          | 1184.21            | 5665.66            |
| A_68_P30363898 | chr15:78858851-78858898                           | NM_008197:233            | H1f0          | INSIDE                 | 1.637                                                        | 1.917                          | 1289.33            | 2471.43            | 3.139                          | 1051.84            | 3301.42            |
| A_68_P31926197 | chr19:4990111-4990155                             | NM_153553:-161           | Npas4         | PROMOTER               | 1.637                                                        | 3.428                          | 1185.76            | 4064.51            | 5.611                          | 891.16             | 5000.01            |
| A_68_P31438310 | chr17:90855140-90855185                           | NM_020252:636980         | Nrxn1         | INSIDE                 | 1.637                                                        | 2.282                          | 502.53             | 1146.56            | 3.734                          | 388.45             | 1450.58            |
| A_68_P25017511 | chr7:28271855-28271899                            | NM_018820:-95            | Sertad1       | PROMOTER               | 1.637                                                        | 3.640                          | 3792.42            | 13803.19           | 5.956                          | 2868.55            | 17086.23           |
| A_68_P26239531 | chr8:125898300-125898344                          | NM_001037877:588         | Tcf25         | INSIDE                 | 1.637                                                        | 4.492                          | 13008.45           | 58440.41           | 7.353                          | 8218.25            | 60426.39           |
| A_68_P24162469 | chr5:145529670-145529714                          | NM_001081362:32          | Trrap         | INSIDE                 | 1.637                                                        | 2.912                          | 5153.75            | 15010.24           | 4.768                          | 3947.39            | 18822.66           |
| A_68_P32315765 | chrX:33428989-33429033                            | NM_001009947:184         | Dock11        | INSIDE                 | 1.636                                                        | 4.768                          | 664.47             | 3167.92            | 7.801                          | 455.12             | 3550.48            |
| A_68_P26214707 | chr8:122082424-122082468                          | NM_001167910:215         | Mbtps1        | INSIDE                 | 1.636                                                        | 3.018                          | 10827.35           | 32676.37           | 4.939                          | 9094.19            | 44912.50           |
| A_68_P31937159 | chr19:7062178-7062222                             | NM_001185164:-59         | Vegfb         | PROMOTER               | 1.636                                                        | 4.237                          | 3920.15            | 16608.12           | 6.932                          | 3142.11            | 21780.69           |
| A_68_P25656690 | chr8:11635804-11635848                            | NM_133971:-72            | Ankrd10       | PROMOTER               | 1.635                                                        | 2.189                          | 2794.43            | 6117.45            | 3.578                          | 2349.68            | 8407.98            |
| A_68_P20849149 | chr1:177555403-177555447                          | NM_010209:342            | Fhl1          | INSIDE                 | 1.635                                                        | 2.754                          | 1911.22            | 5263.50            | 4.503                          | 1609.59            | 7248.39            |
| A_68_P26463576 | chr9:43553455-43553499                            | NM_021424:818            | Pvrl1         | INSIDE                 | 1.635                                                        | 2.694                          | 1269.60            | 3420.11            | 4.405                          | 1012.01            | 4458.27            |
| A_68_P27841688 | chr11:60034191-60034235                           | NM_011480:-106           | Srebfl        | PROMOTER               | 1.635                                                        | 1.775                          | 1170.73            | 2077.55            | 2.902                          | 1024.89            | 2974.20            |
| A_68_P26883804 | chr9:121403538-121403582                          | NM_031161:1247           | Cck           | INSIDE                 | 1.634                                                        | 3.579                          | 904.53             | 3237.06            | 5.846                          | 706.74             | 4131.75            |
| A_68_P30378505 | chr15:81416613-81416657                           | NM_177821:-9             | Ep300         | PROMOTER               | 1.634                                                        | 2.357                          | 831.78             | 1960.41            | 3.851                          | 635.86             | 2448.47            |
| A_68_P25496222 | chr7:132850904-132850948                          | NM_207239:276            | Gtf3e1        | INSIDE                 | 1.634                                                        | 1.799                          | 3778.37            | 6797.00            | 2.940                          | 3048.35            | 8961.42            |
| A_68_P27500776 | chr10:120416131-120416176                         | NM_001081193:233         | Lemd3         | INSIDE                 | 1.634                                                        | 2.904                          | 292.41             | 849.04             | 4.744                          | 304.63             | 1445.30            |
| A_68_P25019829 | chr7:28834940-28834984                            | NM_011874:149            | Psmc4         | INSIDE                 | 1.634                                                        | 3.138                          | 4381.20            | 13749.46           | 5.130                          | 3217.72            | 16505.36           |
| A_68_P30513218 | chr16:5013781-5013827                             | NM_133185:-158           | Rogdi         | PROMOTER               | 1.634                                                        | 3.783                          | 2479.14            | 9378.26            | 6.183                          | 1863.86            | 11524.08           |
| A_68_P30497699 | chr15:102236639-102236683                         | NM_013672:-86            | Sp1           | PROMOTER               | 1.634                                                        | 2.607                          | 1459.41            | 3804.34            | 4.259                          | 1211.32            | 5158.72            |
| A_68_P26817224 | chr9:108838919-108838963                          | NM_025407:280            | Uqerc1        | INSIDE                 | 1.634                                                        | 3.523                          | 5287.92            | 18628.69           | 5.757                          | 4049.89            | 23316.55           |
| A_68_P28729933 | chr12:110032849-110032893                         | NM_009537:1350           | Yy1           | INSIDE                 | 1.634                                                        | 2.528                          | 1099.01            | 2778.47            | 4.132                          | 930.27             | 3843.93            |
| A_68_P25210201 | chr7:77425441-77425485                            | AK148659:-817            |               | PROMOTER               | 1.634                                                        | 2.457                          | 4533.42            | 11136.61           | 4.014                          | 3412.47            | 13696.92           |
| A_68_P24098740 | chr5:132014030-132014074                          | NM_177047:1004161        | Auts2         | INSIDE                 | 1.633                                                        | 3.487                          | 5752.28            | 20058.84           | 5.694                          | 4561.64            | 25972.06           |
| A_68_P24820864 | chr6:125444507-125444551                          | NM_007657:245            | Cd9           | INSIDE                 | 1.633                                                        | 3.222                          | 799.10             | 2574.41            | 5.262                          | 716.17             | 3768.19            |
| A_68_P20796287 | chr1:167694031-167694075                          | NM_011804:142            | Creg1         | INSIDE                 | 1.633                                                        | 2.890                          | 2035.65            | 5883.48            | 4.720                          | 1667.89            | 7872.74            |
| A_68_P26039225 | chr8:90661714-90661758                            | NM_172757:-47            | Heatr3        | PROMOTER               | 1.633                                                        | 2.504                          | 2413.44            | 6042.63            | 4.088                          | 2631.80            | 10757.83           |
| A_68_P30963193 | chr16:91485518-91485562                           | NM_010508:81             | Ifnar1        | INSIDE                 | 1.633                                                        | 1.748                          | 1050.16            | 1835.82            | 2.855                          | 791.62             | 2260.23            |
| A_68_P20961517 | chr2:3202117-3202161                              | NM_008708:579            | Nmt2          | INSIDE                 | 1.633                                                        | 1.432                          | 1668.58            | 2389.46            | 2.338                          | 1338.90            | 3130.71            |
| A_68_P32672454 | chrX:131076324-131076368                          | NM_013898:-178           | Timm8a1       | PROMOTER               | 1.633                                                        | 3.393                          | 810.91             | 2751.17            | 5.540                          | 428.52             | 2374.03            |
| A_68_P21836569 | chr2:167457610-167457654                          | NM_023230:-127           | Ube2v1        | PROMOTER               | 1.633                                                        | 3.680                          | 822.83             | 3028.11            | 6.008                          | 636.44             | 3824.00            |
| A_68_P22766408 | chr4:19636033-19636077                            | NM_177327:86             | Wwp1          | INSIDE                 | 1.633                                                        | 3.436                          | 1455.50            | 5000.53            | 5.611                          | 1334.52            | 7487.54            |
| A_68_P24954457 | chr7:6141163-6141207                              | NM_001146024:17070       | Zfp444        | INSIDE                 | 1.633                                                        | 2.299                          | 250.55             | 575.91             | 3.754                          | 227.18             | 852.87             |
| A_68_P23591268 | A_68_P23591268                                    |                          |               | Unknown                | 1.633                                                        | 3.481                          | 806.43             | 2807.22            | 5.686                          | 553.20             | 3145.63            |
| A_68_P33011727 | A_68_P33011727                                    |                          |               | Unknown                | 1.633                                                        | 2.385                          | 193.78             | 462.11             | 3.894                          | 160.14             | 623.51             |
| A_68_P20914292 | chr1:189431401-189431445                          | ENSMUST00000127489:-1247 |               | PROMOTER               | 1.633                                                        | 3.202                          | 2279.69            | 7300.11            | 5.230                          | 1679.29            | 8782.37            |
| A_68_P27646748 | chr11:23533451-23533495                           | NM_027860:159            | 0610010F05Rik | INSIDE                 | 1.632                                                        | 2.999                          | 1129.84            | 3388.09            | 4.894                          | 941.33             | 4606.87            |
| A_68_P24050005 | chr5:122821860-122821904                          | NM_026883:90             | 1500011H22Rik | INSIDE                 | 1.632                                                        | 2.350                          | 644.45             | 1514.69            | 3.835                          | 582.15             | 2232.74            |
| A_68_P32373277 | chrX:48194552-48194596                            | NM_133729:-38            | 2610018G03Rik | PROMOTER               | 1.632                                                        | 3.797                          | 920.52             | 3495.16            | 6.197                          | 695.81             | 4311.93            |
| A_68_P24759117 | chr6:113328299-113328343                          | NM_001170485:214         | Arpc4         | INSIDE                 | 1.632                                                        | 11.956                         | 3011.48            | 36006.38           | 19.517                         | 2285.29            | 44602.84           |
| A_68_P29009046 | chr13:46764820-46764864                           | NM_001033192:-48         | C78339        | PROMOTER               | 1.632                                                        | 1.658                          | 654.49             | 1085.11            | 2.705                          | 563.16             | 1523.44            |
| A_68_P21421545 | chr2:91095901-91095945                            | NM_030880:-1047          | Pacsin3       | PROMOTER               | 1.632                                                        | 4.268                          | 1205.71            | 5146.03            | 6.967                          | 981.70             | 6839.83            |
| A_68_P23749120 | chr5:64484497-64484541                            | NM_025700:332            | Pgm1          | INSIDE                 | 1.632                                                        | 4.520                          | 2595.29            | 11730.50           | 7.376                          | 2168.53            | 15994.06           |
| A_68_P27568397 | chr11:6315971-6316015                             | NM_008907:120            | Ppia          | INSIDE                 | 1.632                                                        | 3.616                          | 2360.54            | 8534.66            | 5.899                          | 1898.06            | 11197.31           |
| A_68_P24127508 | chr5:138220341-138220385                          | NM_027242:217            | 2010007H12Rik | INSIDE                 | 1.631                                                        | 3.683                          | 2150.37            | 7919.10            | 6.005                          | 1663.78            | 9990.80            |
| A_68_P27351975 | chr10:92623318-92623362                           | NM_146239:-280           | Cdk17         | PROMOTER               | 1.631                                                        | 5.287                          | 5246.48            | 27740.47           | 8.626                          | 4202.19            | 36248.87           |
| A_68_P27543292 | chr10:128242453-128242497                         | NM_028873:-257           | Dnajc14       | DIVERGENT_PROMOTER     | 1.631                                                        | 2.164                          | 846.84             | 1832.34            | 3.529                          | 769.79             | 2716.63            |
| A_68_P27924590 | chr11:74982634-74982678                           | NM_001098203:-1002       | Hic1          | PROMOTER               | 1.631                                                        | 2.257                          | 1046.15            | 2361.43            | 3.682                          | 817.05             | 3008.34            |
| A_68_P26977750 | chr10:18565037-18565081                           | NM_022032:182            | Perp          | INSIDE                 | 1.631                                                        | 6.079                          | 2807.39            | 17066.31           | 9.913                          | 2265.96            | 22463.50           |
| A_68_P26918726 | chr10:6979506-6979550                             | NM_133485:863            | Ppp1r14c      | INSIDE                 | 1.631                                                        | 3.344                          | 2479.69            | 8292.48            | 5.454                          | 1974.99            | 10772.07           |

| ProbeName      | Target position of probe on CpG island microarray | TargetID                 | GeneSymbol    | CpG island Description | Ratio of relative methylation (TiO <sub>2</sub> -NP/Vehicle) | Sham group                     |                    |                    | TiO <sub>2</sub> -H group      |                    |                    |
|----------------|---------------------------------------------------|--------------------------|---------------|------------------------|--------------------------------------------------------------|--------------------------------|--------------------|--------------------|--------------------------------|--------------------|--------------------|
|                |                                                   |                          |               |                        |                                                              | Relative methylation (Cy5/Cy3) | Cy3 signal (Input) | Cy5 signal (MeDIP) | Relative methylation (Cy5/Cy3) | Cy3 signal (Input) | Cy5 signal (MeDIP) |
| A_68_P23542998 | chr5:24110558-24110602                            | NM_025891:-2760          | Smarcd3       | PROMOTER               | 1.631                                                        | 8.477                          | 7541.98            | 63933.24           | 13.824                         | 5614.49            | 77617.03           |
| A_68_P26153173 | chr8:111324170-111324214                          | NM_007496:85649          | Zfx3          | INSIDE                 | 1.631                                                        | 2.018                          | 591.48             | 1193.66            | 3.292                          | 440.15             | 1448.85            |
| A_68_P23094811 | chr4:88940707-88940751                            | NM_009877:-205           | Cdkn2a        | PROMOTER               | 1.630                                                        | 1.577                          | 574.53             | 906.09             | 2.571                          | 449.85             | 1156.63            |
| A_68_P25092923 | chr7:52662436-52662480                            | NM_010596:1129           | Kena7         | INSIDE                 | 1.630                                                        | 5.866                          | 1061.24            | 6225.62            | 9.563                          | 899.09             | 8597.98            |
| A_68_P26811667 | chr9:107803499-107803544                          | NM_028369:13062          | Mon1a         | INSIDE                 | 1.630                                                        | 6.893                          | 1343.62            | 9261.42            | 11.234                         | 1132.45            | 12721.99           |
| A_68_P28961844 | chr13:38727138-38727182                           | NM_139063:-182           | Muted         | PROMOTER               | 1.630                                                        | 1.777                          | 971.29             | 1726.20            | 2.897                          | 765.87             | 2218.59            |
| A_68_P29508104 | chr14:31638725-31638769                           | NM_028839:-33            | Tmem110       | PROMOTER               | 1.630                                                        | 7.519                          | 1861.83            | 13998.85           | 12.256                         | 1443.88            | 17696.25           |
| A_68_P27912376 | chr11:72420588-72420632                           | NM_025985:-152           | Ube2g1        | PROMOTER               | 1.630                                                        | 3.721                          | 980.28             | 3647.77            | 6.065                          | 904.63             | 5486.35            |
| A_68_P28190095 | chr11:121215875-121215919                         | NM_025793:-135           | Wdr451        | PROMOTER               | 1.630                                                        | 9.024                          | 2659.39            | 23999.48           | 14.714                         | 1804.12            | 26545.49           |
| A_68_P31469349 | chr18:5591373-5591417                             | NM_011546:-494           | Zeb1          | PROMOTER               | 1.630                                                        | 2.036                          | 1186.01            | 2415.11            | 3.319                          | 998.95             | 3315.18            |
| A_68_P21105115 | chr2:30627096-30627141                            |                          |               | Unknown                | 1.630                                                        | 2.805                          | 2376.46            | 6665.33            | 4.572                          | 1891.60            | 8648.49            |
| A_68_P33008885 | chr12:21117800-21117844                           | NM_001004364:206         | Asap2         | INSIDE                 | 1.629                                                        | 3.874                          | 2797.09            | 10835.86           | 6.309                          | 2307.57            | 14558.86           |
| A_68_P28596932 | chr12:85534521-85534565                           | NM_001163502:423         | C130039016Rik | INSIDE                 | 1.629                                                        | 4.959                          | 3598.27            | 17843.45           | 8.078                          | 2828.40            | 22847.40           |
| A_68_P24423149 | chr6:47404611-47404655                            | NM_012042:310            | Cul1          | INSIDE                 | 1.629                                                        | 10.303                         | 2595.13            | 26738.51           | 16.788                         | 1833.59            | 30782.91           |
| A_68_P20910364 | chr1:188791866-188791912                          | NM_033077:594            | D1Pas1        | INSIDE                 | 1.629                                                        | 6.821                          | 1369.42            | 9340.44            | 11.108                         | 1236.49            | 13735.20           |
| A_68_P25498529 | chr7:133225199-133225243                          | NM_001101488:705         | Gsg11         | INSIDE                 | 1.629                                                        | 1.489                          | 2851.67            | 4247.28            | 2.426                          | 2294.74            | 5577.07            |
| A_68_P21623006 | chr2:128926947-128926991                          | NM_009086:237            | Poir1b        | INSIDE                 | 1.629                                                        | 1.389                          | 1216.53            | 1689.37            | 2.262                          | 1077.43            | 2436.99            |
| A_68_P21773626 | chr2:156665615-156665659                          | NM_173396:-176           | Tgif2         | PROMOTER               | 1.629                                                        | 4.810                          | 1506.49            | 7246.49            | 7.837                          | 1272.30            | 9971.61            |
| A_68_P22475538 | chr3:120965447-120965491                          | NM_178936:766            | Tmem56        | INSIDE                 | 1.629                                                        | 3.110                          | 1198.08            | 3726.36            | 5.068                          | 1119.74            | 5674.32            |
| A_68_P22860680 | chr4:41082241-41082285                            | NM_026275:-791           | Ube2r2        | PROMOTER               | 1.629                                                        | 1.364                          | 2700.44            | 3684.57            | 2.222                          | 2131.24            | 4735.93            |
| A_68_P27830380 | chr11:58136423-58136467                           | NM_178761:404            | Zfp672        | INSIDE                 | 1.629                                                        | 4.207                          | 4136.22            | 17401.81           | 6.852                          | 3392.02            | 23243.79           |
| A_68_P20412463 | chr1:88400704-88400748                            |                          |               | Unknown                | 1.629                                                        | 4.268                          | 5210.04            | 22236.22           | 6.951                          | 4080.44            | 28361.68           |
| A_68_P26018418 | chr8:86671979-86672023                            | NM_001163752:64          | 4930432K21Rik | INSIDE                 | 1.628                                                        | 2.483                          | 2729.10            | 6776.31            | 4.043                          | 2053.68            | 8303.57            |
| A_68_P24330588 | chr6:30124352-30124396                            | NR_038124:-2248          | BB283400      | DIVERGENT_PROMOTER     | 1.628                                                        | 3.446                          | 1069.53            | 3685.40            | 5.610                          | 927.75             | 5204.62            |
| A_68_P20422167 | chr1:90102351-90102395                            | NM_008299:-49            | Dnajb3        | DIVERGENT_PROMOTER     | 1.628                                                        | 6.145                          | 1938.67            | 11913.38           | 10.006                         | 1545.92            | 15468.64           |
| A_68_P22410841 | chr3:107948966-107949010                          | NM_010306:44             | Gnai3         | INSIDE                 | 1.628                                                        | 3.286                          | 970.21             | 3187.70            | 5.350                          | 788.34             | 4217.64            |
| A_68_P24981713 | chr7:17062092-17062136                            | NM_008718:15             | Npas1         | INSIDE                 | 1.628                                                        | 2.284                          | 757.96             | 1731.04            | 3.718                          | 644.47             | 2396.16            |
| A_68_P23234756 | chr4:117167070-117167114                          | NM_025739:2428           | Rnf220        | INSIDE                 | 1.628                                                        | 6.644                          | 1123.56            | 7465.08            | 10.820                         | 864.45             | 9353.10            |
| A_68_P31187135 | chr17:43153738-43153782                           | NM_178589:257            | Tnfrsf21      | INSIDE                 | 1.628                                                        | 4.557                          | 2213.00            | 10085.59           | 7.421                          | 1633.92            | 12124.77           |
| A_68_P32565197 | chrX:98892164-98892208                            | ENSMUST00000073812:-4997 |               | PROMOTER               | 1.628                                                        | 5.281                          | 10261.67           | 54192.20           | 8.596                          | 3845.96            | 33060.00           |
| A_68_P25833742 | chr8:47085366-47085410                            | NM_001039562:-184        | Ankrd37       | PROMOTER               | 1.627                                                        | 1.854                          | 2843.21            | 5270.09            | 3.016                          | 2169.42            | 6542.60            |
| A_68_P27183504 | chr10:61441353-61441397                           | NM_007731:482            | Col13a1       | INSIDE                 | 1.627                                                        | 2.560                          | 905.42             | 2317.85            | 4.164                          | 745.87             | 3106.00            |
| A_68_P25410984 | chr7:117103504-117103548                          | NM_021494:410            | Dennd5a       | INSIDE                 | 1.627                                                        | 1.745                          | 1202.04            | 2097.07            | 2.838                          | 950.80             | 2698.44            |
| A_68_P24429118 | chr6:48692680-48692724                            | NM_008376:3657           | Gimap1        | INSIDE                 | 1.627                                                        | 6.458                          | 1090.95            | 7045.70            | 10.506                         | 940.90             | 9884.70            |
| A_68_P30482201 | chr15:99602827-99602871                           | NM_028015:98             | Lass5         | INSIDE                 | 1.627                                                        | 3.930                          | 4100.43            | 16113.09           | 6.392                          | 3087.66            | 19737.30           |
| A_68_P21900919 | chr2:179760085-179760129                          | NM_177727:415            | Lsm14b        | INSIDE                 | 1.627                                                        | 4.030                          | 1686.18            | 6795.38            | 6.555                          | 1408.10            | 9230.65            |
| A_68_P32786683 | chrX:158346162-158346206                          | NM_001081052:251538      | Nhs           | INSIDE                 | 1.627                                                        | 4.032                          | 2483.51            | 10013.66           | 6.560                          | 1267.66            | 8315.23            |
| A_68_P28184543 | chr11:120298753-120298797                         | NM_001195023:240         | Nploc4        | INSIDE                 | 1.627                                                        | 2.140                          | 11825.52           | 25303.55           | 3.481                          | 8744.97            | 30442.56           |
| A_68_P27810583 | chr11:54336349-54336393                           | NM_175258:22             | Rapgef6       | INSIDE                 | 1.627                                                        | 2.089                          | 939.96             | 1963.23            | 3.398                          | 789.84             | 2684.12            |
| A_68_P22405709 | chr3:107135696-107135740                          | NM_001045807:489         | Rbm15         | INSIDE                 | 1.627                                                        | 3.136                          | 3799.14            | 11913.80           | 5.103                          | 3192.75            | 16291.12           |
| A_68_P27080342 | chr10:39452039-39452083                           | NM_011264:95             | Rev3l         | INSIDE                 | 1.627                                                        | 2.038                          | 1075.82            | 2192.25            | 3.315                          | 865.77             | 2869.70            |
| A_68_P31232583 | chr17:51318678-51318722                           | NM_028162:-26            | Tbc1d5        | PROMOTER               | 1.627                                                        | 2.670                          | 1622.53            | 4332.51            | 4.344                          | 1220.79            | 5303.73            |
| A_68_P28182345 | chr11:119959914-119959958                         | NM_183137:109            | 241000210Rik  | INSIDE                 | 1.626                                                        | 1.880                          | 1012.24            | 1902.83            | 3.057                          | 758.19             | 2317.78            |
| A_68_P30587818 | chr16:20498949-20498993                           | NM_172265:81             | Ei2b5         | INSIDE                 | 1.626                                                        | 1.709                          | 569.66             | 973.48             | 2.778                          | 495.87             | 1377.71            |
| A_68_P25099054 | chr7:53683157-53683201                            | NM_001112739:31312       | Kenc1         | INSIDE                 | 1.626                                                        | 7.224                          | 2254.21            | 16284.40           | 11.748                         | 1472.00            | 17293.73           |
| A_68_P31106324 | chr17:25934049-25934093                           | NM_133719:-80            | Metrn         | PROMOTER               | 1.626                                                        | 2.274                          | 1344.63            | 3058.13            | 3.697                          | 1092.50            | 4039.16            |
| A_68_P25009543 | chr7:26082789-26082833                            | NM_008776:164            | Pafah1b3      | INSIDE                 | 1.626                                                        | 3.401                          | 2594.91            | 8824.50            | 5.529                          | 2029.01            | 11218.18           |
| A_68_P23314345 | chr4:132399162-132399206                          | NM_146154:-100           | Ppp1r8        | PROMOTER               | 1.626                                                        | 4.182                          | 1875.06            | 7842.09            | 6.801                          | 1488.10            | 10121.29           |
| A_68_P28875776 | chr13:22098904-22098948                           | NM_019429:2684           | Prss16        | INSIDE                 | 1.626                                                        | 3.801                          | 2569.89            | 9769.27            | 6.181                          | 1796.94            | 11106.62           |
| A_68_P28071137 | chr11:100820628-100820677                         | NM_008986:11279          | Ptrf          | INSIDE                 | 1.626                                                        | 2.201                          | 271.72             | 598.16             | 3.580                          | 237.92             | 851.66             |
| A_68_P25126430 | chr7:59261254-59261298                            | NR_027704:-192           | Svip          | PROMOTER               | 1.626                                                        | 3.084                          | 7032.53            | 21687.90           | 5.015                          | 5516.22            | 27665.59           |

| ProbeName      | Target position of probe on CpG island microarray | TargetID               | GeneSymbol    | CpG island Description | Ratio of relative methylation (TiO <sub>2</sub> -NP/Vehicle) | Sham group                     |                    |                    | TiO <sub>2</sub> -H group      |                    |                    |
|----------------|---------------------------------------------------|------------------------|---------------|------------------------|--------------------------------------------------------------|--------------------------------|--------------------|--------------------|--------------------------------|--------------------|--------------------|
|                |                                                   |                        |               |                        |                                                              | Relative methylation (Cy5/Cy3) | Cy3 signal (Input) | Cy5 signal (MeDIP) | Relative methylation (Cy5/Cy3) | Cy3 signal (Input) | Cy5 signal (MeDIP) |
| A_68_P22323188 | chr3:89856392-89856436                            | NM_028475:-17          | Ubap2l        | PROMOTER               | 1.626                                                        | 1.802                          | 9446.78            | 17020.32           | 2.929                          | 6798.45            | 19913.72           |
| A_68_P24115158 | chr5:135663906-135663950                          | NM_011714:736          | Baz1b         | INSIDE                 | 1.625                                                        | 4.863                          | 843.16             | 4100.18            | 7.903                          | 750.44             | 5930.37            |
| A_68_P21840215 | chr2:168055402-168055451                          | NM_010072:453          | Dpm1          | INSIDE                 | 1.625                                                        | 2.341                          | 439.97             | 1029.83            | 3.804                          | 363.32             | 1382.21            |
| A_68_P29996481 | chr15:7760813-7760857                             | NM_010275:-176         | Gdnf          | PROMOTER               | 1.625                                                        | 3.802                          | 1226.00            | 4661.44            | 6.177                          | 960.25             | 5931.57            |
| A_68_P26587299 | chr9:65219825-65219869                            | NM_001111145:10980     | Gm514         | INSIDE                 | 1.625                                                        | 6.392                          | 4269.15            | 27288.57           | 10.385                         | 3395.63            | 35263.23           |
| A_68_P29569514 | chr14:45839639-45839683                           | NM_027518:269          | Gpr137c       | INSIDE                 | 1.625                                                        | 4.403                          | 1455.02            | 6406.46            | 7.154                          | 1082.09            | 7741.07            |
| A_68_P27862275 | chr11:63732951-63732995                           | NM_018805:2814         | Hs3st3b1      | INSIDE                 | 1.625                                                        | 4.099                          | 641.44             | 2629.45            | 6.661                          | 508.06             | 3384.07            |
| A_68_P24024083 | chr5:118478594-118478638                          | NM_021344:784          | Tesc          | INSIDE                 | 1.625                                                        | 4.891                          | 4373.06            | 21388.98           | 7.949                          | 3586.56            | 28509.15           |
| A_68_P23429319 | chr4:153514065-153514109                          | NM_011642:231          | Trp73         | INSIDE                 | 1.625                                                        | 4.438                          | 1760.55            | 7813.59            | 7.211                          | 1637.29            | 11805.84           |
| A_68_P26875426 | chr9:119883221-119883265                          | NM_153287:10534        | Camp1         | INSIDE                 | 1.624                                                        | 3.499                          | 1072.24            | 3751.45            | 5.682                          | 894.90             | 5084.44            |
| A_68_P24156243 | chr5:144131687-144131731                          | NM_133355:6122         | Grid2ip       | INSIDE                 | 1.624                                                        | 1.924                          | 4737.74            | 9114.19            | 3.124                          | 4028.32            | 12585.02           |
| A_68_P26547037 | chr9:58160685-58160729                            | NM_010729:313          | Lox1l         | INSIDE                 | 1.624                                                        | 3.568                          | 794.13             | 2833.46            | 5.793                          | 679.29             | 3935.25            |
| A_68_P29360867 | chr13:117813151-117813195                         | NM_001081009:1151      | Parp8         | INSIDE                 | 1.624                                                        | 2.720                          | 1787.53            | 4862.28            | 4.418                          | 1510.48            | 6672.61            |
| A_68_P26766653 | chr9:99775810-99775854                            | NM_011440:757          | Sox14         | INSIDE                 | 1.624                                                        | 2.131                          | 357.97             | 762.89             | 3.461                          | 336.16             | 1163.37            |
| A_68_P21777116 | chr2:157282885-157282929                          | NM_001025395:32878     | Src           | INSIDE                 | 1.624                                                        | 1.761                          | 1431.74            | 2521.94            | 2.861                          | 1201.96            | 3438.40            |
| A_68_P23298057 | chr4:129373770-129373814                          | NM_199305:290          | Tmem39b       | INSIDE                 | 1.624                                                        | 1.711                          | 1592.30            | 2724.61            | 2.779                          | 1302.78            | 3620.70            |
| A_68_P26948857 | chr10:12780907-12780951                           | FJ425893:619           |               | INSIDE                 | 1.624                                                        | 2.131                          | 456.21             | 972.32             | 3.462                          | 445.93             | 1543.60            |
| A_68_P32135373 | chr19:45005375-45005419                           | NM_001081225:-212      | Fam178a       | PROMOTER               | 1.623                                                        | 2.807                          | 2918.14            | 8191.52            | 4.556                          | 2514.21            | 11455.31           |
| A_68_P23018909 | chr4:73659645-73659689                            | NM_172869:160          | Frm3d         | INSIDE                 | 1.623                                                        | 1.485                          | 899.52             | 1335.79            | 2.410                          | 685.09             | 1650.77            |
| A_68_P31834169 | chr18:75121056-75121100                           | NM_010720:-161         | Lipg          | PROMOTER               | 1.623                                                        | 1.568                          | 2716.88            | 4259.32            | 2.544                          | 2197.72            | 5591.66            |
| A_68_P25285303 | chr7:91032985-91033029                            | NM_030705:-155         | Mesdc1        | DIVERGENT_PROMOTER     | 1.623                                                        | 2.693                          | 480.29             | 1293.34            | 4.369                          | 553.86             | 2419.97            |
| A_68_P27564592 | chr11:5607482-5607526                             | NM_026080:198          | Mrps24        | INSIDE                 | 1.623                                                        | 5.515                          | 638.51             | 3521.43            | 8.951                          | 525.42             | 4702.85            |
| A_68_P31513737 | chr18:14841164-14841208                           | NM_001161369:237       | Ss18          | INSIDE                 | 1.623                                                        | 5.982                          | 1313.71            | 7859.24            | 9.711                          | 1187.27            | 11529.15           |
| A_68_P30140505 | chr15:36723538-36723582                           | NM_011740:733          | Ywhaz         | INSIDE                 | 1.623                                                        | 2.586                          | 1808.20            | 4675.67            | 4.198                          | 1640.94            | 6888.50            |
| A_68_P32410977 | chrX:56820526-56820570                            | ENSMUST00000124402:101 |               | INSIDE                 | 1.623                                                        | 3.590                          | 723.06             | 2595.98            | 5.828                          | 472.85             | 2755.59            |
| A_68_P26631268 | chr9:72951661-72951705                            | NM_025890:1478         | 2410004A20Rik | INSIDE                 | 1.622                                                        | 1.903                          | 344.84             | 656.35             | 3.086                          | 354.88             | 1095.29            |
| A_68_P20293904 | chr1:64737359-64737403                            | NR_038009:-147         | 281040811Rik  | DIVERGENT_PROMOTER     | 1.622                                                        | 1.860                          | 1054.52            | 1961.20            | 3.017                          | 834.70             | 2518.52            |
| A_68_P21958957 | chr3:14886237-14886281                            | NM_009801:-167         | Car2          | PROMOTER               | 1.622                                                        | 2.677                          | 743.86             | 1991.60            | 4.342                          | 579.74             | 2517.33            |
| A_68_P32567641 | chrX:99384743-99384787                            | NM_009094:-1054        | Rps4x         | PROMOTER               | 1.622                                                        | 2.279                          | 620.42             | 1413.98            | 3.696                          | 430.02             | 1589.15            |
| A_68_P32750678 | chrX:149204051-149204095                          | NM_172441:-68          | Shroom2       | PROMOTER               | 1.622                                                        | 2.671                          | 2098.76            | 5606.54            | 4.334                          | 1352.04            | 5859.93            |
| A_68_P25477108 | chr7:129210764-129210808                          | NM_138589:75           | Ubf1d         | INSIDE                 | 1.622                                                        | 5.308                          | 1922.64            | 10205.63           | 8.608                          | 1580.94            | 13609.45           |
| A_68_P24954292 | chr7:6107153-6107197                              | NM_001013012:399       | Zfp787        | INSIDE                 | 1.622                                                        | 1.848                          | 928.31             | 1715.63            | 2.997                          | 1187.74            | 3560.21            |
| A_68_P30931281 | chr16:85803417-85803461                           | NM_009621:-78          | Adams1        | PROMOTER               | 1.621                                                        | 2.412                          | 1529.85            | 3690.67            | 3.912                          | 1277.02            | 4995.29            |
| A_68_P22069519 | chr3:38383514-38383558                            | NM_001167883:202       | Ankrd50       | INSIDE                 | 1.621                                                        | 3.267                          | 2974.55            | 9716.58            | 5.297                          | 2486.82            | 13171.62           |
| A_68_P25772218 | chr8:35171274-35171318                            | NM_011722:269          | Detn6         | INSIDE                 | 1.621                                                        | 1.979                          | 1786.21            | 3534.22            | 3.208                          | 1530.23            | 4909.07            |
| A_68_P23203786 | chr4:109656795-109656839                          | NM_172296:6187         | Dmrta2        | DOWNSTREAM             | 1.621                                                        | 8.757                          | 7571.12            | 66301.58           | 14.193                         | 5316.97            | 75464.36           |
| A_68_P30720009 | chr16:44173533-44173577                           | NM_001029889:45        | Gm608         | INSIDE                 | 1.621                                                        | 3.061                          | 994.91             | 3045.29            | 4.961                          | 793.75             | 3937.64            |
| A_68_P28670941 | chr12:99812671-99812719                           | NM_029911:3456         | Kenk10        | INSIDE                 | 1.621                                                        | 2.562                          | 1091.94            | 2797.22            | 4.153                          | 868.16             | 3605.85            |
| A_68_P28225274 | chr12:8928368-8928412                             | NM_008640:278          | Laptn4a       | INSIDE                 | 1.621                                                        | 2.539                          | 2628.18            | 6673.66            | 4.117                          | 2032.54            | 8367.79            |
| A_68_P20658349 | chr1:140515986-140516030                          | NM_021605:265          | Nek7          | INSIDE                 | 1.621                                                        | 2.357                          | 1442.96            | 3401.75            | 3.822                          | 1214.75            | 4642.75            |
| A_68_P32134209 | chr19:44830746-44830790                           | NM_011037:-1115        | Pax2          | PROMOTER               | 1.621                                                        | 2.469                          | 5256.54            | 12977.15           | 4.002                          | 3853.20            | 15420.81           |
| A_68_P21431995 | chr2:92855411-92855455                            | NM_001177536:30869     | Prdm11        | INSIDE                 | 1.621                                                        | 1.810                          | 1126.49            | 2039.31            | 2.935                          | 947.95             | 2782.42            |
| A_68_P27925675 | chr11:75162047-75162091                           | NM_001102611:134       | Smyd4         | INSIDE                 | 1.621                                                        | 1.499                          | 641.77             | 962.31             | 2.431                          | 578.57             | 1406.70            |
| A_68_P31330059 | chr17:71007053-71007097                           | NM_001128181:95988     | Dlgap1        | INSIDE                 | 1.620                                                        | 13.447                         | 4003.88            | 53839.91           | 21.787                         | 2580.13            | 56214.38           |
| A_68_P25392118 | chr7:112548478-112548522                          | NM_199009:25           | Fam160a2      | INSIDE                 | 1.620                                                        | 2.580                          | 1482.11            | 3824.40            | 4.181                          | 1279.22            | 5348.77            |
| A_68_P27909076 | chr11:71855740-71855784                           | NM_144526:-241         | Fam64a        | DIVERGENT_PROMOTER     | 1.620                                                        | 3.912                          | 2415.26            | 9447.36            | 6.336                          | 2014.18            | 12761.04           |
| A_68_P32507212 | chrX:83022021-83022065                            | NM_008194:116          | Gyk           | INSIDE                 | 1.620                                                        | 5.178                          | 30351.68           | 157156.00          | 8.389                          | 20975.09           | 175956.90          |
| A_68_P23602238 | chr5:36022053-36022097                            | NM_030127:357          | Htra3         | INSIDE                 | 1.620                                                        | 5.000                          | 2167.98            | 10840.38           | 8.098                          | 1422.78            | 11521.52           |
| A_68_P26983891 | chr10:19653749-19653793                           | NM_008580:-561         | Map3k5        | PROMOTER               | 1.620                                                        | 1.830                          | 1693.83            | 3099.84            | 2.964                          | 1458.46            | 4322.90            |
| A_68_P23524104 | chr5:20561279-20561323                            | NM_011203:315          | Ptpn12        | INSIDE                 | 1.620                                                        | 2.868                          | 1128.95            | 3237.74            | 4.647                          | 1044.95            | 4855.85            |
| A_68_P27228619 | chr10:69707994-69708038                           | NM_025807:-7           | Slc16a9       | PROMOTER               | 1.620                                                        | 7.744                          | 1500.53            | 11620.31           | 12.543                         | 1322.87            | 16592.67           |

| ProbeName      | Target position of probe on CpG island microarray | TargetID           | GeneSymbol     | CpG island Description | Ratio of relative methylation (TiO <sub>2</sub> -NP/Vehicle) | Sham group                     |                    |                    | TiO <sub>2</sub> -H group      |                    |                    |
|----------------|---------------------------------------------------|--------------------|----------------|------------------------|--------------------------------------------------------------|--------------------------------|--------------------|--------------------|--------------------------------|--------------------|--------------------|
|                |                                                   |                    |                |                        |                                                              | Relative methylation (Cy5/Cy3) | Cy3 signal (Input) | Cy5 signal (MeDIP) | Relative methylation (Cy5/Cy3) | Cy3 signal (Input) | Cy5 signal (MeDIP) |
| A_68_P31159487 | chr17:35653700-35653744                           | NM_001163763:47    | Tcf19          | INSIDE                 | 1.620                                                        | 2.076                          | 1916.59            | 3979.58            | 3.364                          | 1478.90            | 4975.61            |
| A_68_P27792052 | chr11:50873003-50873047                           | NM_009329:266      | Zfp354a        | INSIDE                 | 1.620                                                        | 4.509                          | 3530.93            | 15919.26           | 7.304                          | 2608.28            | 19049.86           |
| A_68_P32257887 | chrX:11242111-11242155                            |                    | Unknown        |                        | 1.620                                                        | 2.006                          | 2657.86            | 5331.53            | 3.249                          | 1402.51            | 4556.80            |
| A_68_P21673356 | chr2:138082901-138082945                          | NM_001025431:603   | Btbd3          | INSIDE                 | 1.619                                                        | 1.438                          | 3011.91            | 4330.58            | 3.238                          | 2338.35            | 5442.63            |
| A_68_P21339006 | chr2:74550322-74550366                            | NM_010468:295      | Hoxd3          | INSIDE                 | 1.619                                                        | 2.232                          | 1636.44            | 3653.03            | 3.613                          | 1498.00            | 5412.55            |
| A_68_P30130469 | chr15:34767206-34767250                           | NM_181317:93       | Kens2          | INSIDE                 | 1.619                                                        | 2.579                          | 2835.18            | 7311.52            | 4.174                          | 2259.12            | 9429.48            |
| A_68_P22028771 | chr3:30407557-30407601                            | NM_021442:831      | Mecom          | INSIDE                 | 1.619                                                        | 1.748                          | 767.78             | 1342.21            | 2.830                          | 672.06             | 1901.65            |
| A_68_P24337499 | chr6:31349464-31349508                            | NM_013791:659      | Mkln1          | INSIDE                 | 1.619                                                        | 4.490                          | 3001.53            | 13477.04           | 7.271                          | 2353.24            | 17110.24           |
| A_68_P28466190 | chr12:59313609-59313653                           | NM_009216:840      | Sstr1          | INSIDE                 | 1.619                                                        | 5.454                          | 1300.46            | 7092.60            | 8.829                          | 990.04             | 8741.09            |
| A_68_P28450734 | chr12:56225622-56225666                           | NM_001100116:130   | 1700047117Rik2 | INSIDE                 | 1.618                                                        | 5.076                          | 2323.24            | 11793.75           | 8.212                          | 1827.50            | 15006.68           |
| A_68_P31731124 | chr18:56732842-56732886                           | NM_001127338:-271  | Aldh7a1        | PROMOTER               | 1.618                                                        | 3.079                          | 4363.12            | 13433.92           | 4.981                          | 3711.04            | 18485.84           |
| A_68_P27228310 | chr10:69651858-69651902                           | NM_001111121:92012 | Cecde6         | INSIDE                 | 1.618                                                        | 5.707                          | 8650.37            | 49366.64           | 9.232                          | 5818.45            | 53714.59           |
| A_68_P23185134 | chr4:106234075-106234119                          | NM_053272:454      | Dher24         | INSIDE                 | 1.618                                                        | 1.954                          | 6180.72            | 12074.38           | 3.161                          | 4658.67            | 14725.56           |
| A_68_P25842954 | chr8:48761152-48761196                            | NM_023503:-661     | Ing2           | PROMOTER               | 1.618                                                        | 3.119                          | 729.58             | 2275.67            | 5.047                          | 620.16             | 3130.17            |
| A_68_P32383986 | chrX:50097843-50097887                            | NR_003188:-94      | Kis2           | PROMOTER               | 1.618                                                        | 2.686                          | 13355.12           | 35865.81           | 4.346                          | 6244.36            | 27135.25           |
| A_68_P29266707 | chr13:100785592-100785636                         | NM_030026:-20      | Mecc2          | PROMOTER               | 1.618                                                        | 1.916                          | 809.86             | 1551.88            | 3.100                          | 610.66             | 1893.18            |
| A_68_P21587817 | chr2:122564114-122564158                          | NM_019788:-104     | Pldn           | PROMOTER               | 1.618                                                        | 4.136                          | 1376.79            | 5694.31            | 6.692                          | 1095.09            | 7328.83            |
| A_68_P25669976 | chr8:13677580-13677624                            | NM_009025:-15      | Rasa3          | PROMOTER               | 1.618                                                        | 2.401                          | 1590.19            | 3818.17            | 3.885                          | 1295.35            | 5032.82            |
| A_68_P22705223 | chr4:6292852-6292896                              | NM_001098227:48    | Sdcbp          | INSIDE                 | 1.618                                                        | 2.569                          | 3970.18            | 10197.67           | 4.156                          | 3264.23            | 13567.49           |
| A_68_P27929278 | chr11:75780405-75780449                           |                    | Unknown        |                        | 1.618                                                        | 2.631                          | 267.46             | 703.76             | 4.257                          | 383.23             | 1205.58            |
| A_68_P21745337 | chr2:151528077-151528121                          | NM_001160363:355   | 5430405G05Rik  | INSIDE                 | 1.617                                                        | 12.534                         | 2185.05            | 27386.41           | 20.261                         | 1693.22            | 34306.73           |
| A_68_P28449512 | chr12:55963938-55963982                           | NM_007688:-96      | Cf12           | PROMOTER               | 1.617                                                        | 1.882                          | 1457.03            | 2742.45            | 3.044                          | 1200.81            | 3655.76            |
| A_68_P23610086 | chr5:37259995-37260039                            | NM_172994:208      | Ppp2r2c        | INSIDE                 | 1.617                                                        | 5.030                          | 2473.74            | 12442.91           | 8.135                          | 1955.76            | 15909.70           |
| A_68_P21132202 | chr2:35056385-35056429                            | NM_026697:234      | Rab14          | INSIDE                 | 1.617                                                        | 2.312                          | 2909.12            | 6724.51            | 3.738                          | 2509.32            | 9380.51            |
| A_68_P26133052 | chr8:107850532-107850576                          | NM_025486:291      | Tmem208        | INSIDE                 | 1.617                                                        | 2.535                          | 7908.84            | 20050.59           | 4.099                          | 6297.19            | 25813.56           |
| A_68_P23059231 | chr4:82505707-82505751                            | NM_026647:-163     | Zdhhc21        | PROMOTER               | 1.617                                                        | 2.859                          | 3478.55            | 9944.80            | 4.624                          | 2488.71            | 11508.13           |
| A_68_P26617701 | chr9:70504626-70504670                            | NM_172772:333      | Fam63b         | INSIDE                 | 1.616                                                        | 4.671                          | 1854.17            | 8661.53            | 7.548                          | 1656.06            | 12499.60           |
| A_68_P31930681 | chr19:5758063-5758107                             | NM_008520:17181    | Ltbp3          | INSIDE                 | 1.616                                                        | 4.430                          | 806.23             | 3571.76            | 7.160                          | 691.28             | 4949.47            |
| A_68_P27215083 | chr10:67442230-67442274                           | NM_001081346:-93   | Rtkn2          | PROMOTER               | 1.616                                                        | 3.542                          | 8566.13            | 30338.77           | 5.723                          | 5946.50            | 34030.73           |
| A_68_P21890546 | chr2:178142021-178142065                          | NM_177191:321      | Sycp2          | INSIDE                 | 1.616                                                        | 3.732                          | 5809.31            | 21681.31           | 6.031                          | 4181.96            | 25221.88           |
| A_68_P27181843 | chr10:61158699-61158743                           | NM_027912:459      | Tysnd1         | INSIDE                 | 1.616                                                        | 3.373                          | 978.98             | 3301.84            | 5.452                          | 761.99             | 4154.37            |
| A_68_P32537531 | chrX:91368428-91368472                            | NM_001044386:296   | Zfx            | INSIDE                 | 1.616                                                        | 5.107                          | 1044.72            | 5335.77            | 8.253                          | 681.29             | 5622.91            |
| A_68_P24906444 | chr6:142705194-142705238                          | NM_009908:11       | Cmas           | INSIDE                 | 1.615                                                        | 4.227                          | 1261.52            | 5332.30            | 6.828                          | 1003.63            | 6852.26            |
| A_68_P25020574 | chr7:28965243-28965287                            | NM_010092:752      | Dyrk1b         | INSIDE                 | 1.615                                                        | 3.240                          | 2559.08            | 8290.75            | 5.233                          | 2122.57            | 11107.96           |
| A_68_P28083517 | chr11:102994122-102994166                         | NM_001130516:-508  | Hexim2         | PROMOTER               | 1.615                                                        | 3.255                          | 2038.59            | 6635.67            | 5.256                          | 1583.56            | 8323.43            |
| A_68_P31381048 | chr17:80461571-80461615                           | NM_144802:82       | Hnrp1l         | INSIDE                 | 1.615                                                        | 1.950                          | 1829.96            | 3569.05            | 3.150                          | 1467.27            | 4621.90            |
| A_68_P22028775 | chr3:30408163-30408207                            | NM_021442:225      | Mecom          | INSIDE                 | 1.615                                                        | 3.398                          | 2128.39            | 7231.49            | 5.487                          | 1792.28            | 9834.61            |
| A_68_P20188961 | chr1:43503040-43503084                            | NM_010879:467      | Nck2           | INSIDE                 | 1.615                                                        | 2.269                          | 1442.39            | 3273.18            | 3.665                          | 1765.47            | 6470.17            |
| A_68_P28178599 | chr11:119410964-119411008                         | NM_008730:-1852    | Nptx1          | PROMOTER               | 1.615                                                        | 1.911                          | 1470.34            | 2810.36            | 3.087                          | 1225.21            | 3782.05            |
| A_68_P27357767 | chr10:93610648-93610692                           | NM_011629:-5       | Nr2c1          | PROMOTER               | 1.615                                                        | 3.242                          | 3314.61            | 10746.06           | 5.237                          | 2772.73            | 14520.12           |
| A_68_P28697278 | chr12:104627062-104627106                         | NM_001177841:193   | Otub2          | INSIDE                 | 1.615                                                        | 2.049                          | 1442.32            | 2955.86            | 3.310                          | 1280.20            | 4237.09            |
| A_68_P31117689 | chr17:27792526-27792570                           | NM_011861:-78      | Pacsin1        | PROMOTER               | 1.615                                                        | 3.070                          | 940.96             | 2889.02            | 4.959                          | 739.85             | 3668.92            |
| A_68_P30084544 | chr15:25914715-25914759                           | NM_144523:616      | Zfp622         | INSIDE                 | 1.615                                                        | 2.547                          | 2462.55            | 6272.56            | 4.112                          | 2001.95            | 8232.98            |
| A_68_P23366442 | chr4:141430855-141430899                          | NM_025994:-41      | Efh2           | PROMOTER               | 1.614                                                        | 3.976                          | 1143.10            | 4545.11            | 6.418                          | 993.55             | 6376.66            |
| A_68_P25460625 | chr7:125999193-125999237                          | NM_001081446:-74   | Iqck           | DIVERGENT_PROMOTER     | 1.614                                                        | 2.484                          | 2719.29            | 6755.40            | 4.010                          | 2190.94            | 8785.77            |
| A_68_P21114609 | chr2:32167955-32167999                            | NR_029811:-6003    | Mir199b        | PROMOTER               | 1.614                                                        | 5.640                          | 16942.30           | 95558.65           | 9.104                          | 11346.08           | 103293.50          |
| A_68_P21565317 | chr2:118489132-118489176                          | NM_001033254:-158  | Pak6           | PROMOTER               | 1.614                                                        | 1.728                          | 1297.75            | 2242.70            | 2.790                          | 1069.14            | 2982.74            |
| A_68_P31632702 | chr18:38371220-38371264                           | NM_029357:-1826    | Pedh1          | PROMOTER               | 1.614                                                        | 1.637                          | 1732.59            | 2835.79            | 2.642                          | 1331.45            | 3518.04            |
| A_68_P27632484 | chr11:20531833-20531877                           | NM_001038625:-125  | Sertad2        | PROMOTER               | 1.614                                                        | 3.475                          | 6104.15            | 21214.46           | 5.608                          | 4460.01            | 25012.99           |
| A_68_P22130348 | chr3:51364282-51364326                            | NM_080793:441      | Setd7          | INSIDE                 | 1.614                                                        | 4.461                          | 2334.51            | 10415.15           | 7.201                          | 2072.84            | 14926.78           |
| A_68_P31212432 | chr17:47605282-47605326                           | NM_145489:31717    | Al661453       | INSIDE                 | 1.613                                                        | 1.960                          | 621.47             | 1218.38            | 3.163                          | 511.78             | 1618.89            |

| ProbeName      | Target position of probe on CpG island microarray | TargetID                 | GeneSymbol    | CpG island Description | Ratio of relative methylation (TiO <sub>2</sub> -NP/Vehicle) | Sham group                     |                    |                    | TiO <sub>2</sub> -H group      |                    |                    |
|----------------|---------------------------------------------------|--------------------------|---------------|------------------------|--------------------------------------------------------------|--------------------------------|--------------------|--------------------|--------------------------------|--------------------|--------------------|
|                |                                                   |                          |               |                        |                                                              | Relative methylation (Cy5/Cy3) | Cy3 signal (Input) | Cy5 signal (MeDIP) | Relative methylation (Cy5/Cy3) | Cy3 signal (Input) | Cy5 signal (MeDIP) |
| A_68_P29713894 | chr14:73110055-73110099                           | NM_207636:-266           | Fndc3a        | PROMOTER               | 1.613                                                        | 1.503                          | 3401.65            | 5113.89            | 2.425                          | 2664.88            | 6462.15            |
| A_68_P30367927 | chr15:79521233-79521289                           | NM_013818:-65            | Gtbp1         | DIVERGENT_PROMOTER     | 1.613                                                        | 3.259                          | 2903.88            | 9462.94            | 5.255                          | 2416.36            | 12697.28           |
| A_68_P25730819 | chr8:27229628-27229672                            | NM_207659:46             | Hook3         | INSIDE                 | 1.613                                                        | 2.939                          | 1362.79            | 4005.67            | 4.742                          | 1111.00            | 5268.23            |
| A_68_P25010077 | chr7:26164977-26165021                            | NM_001039507:10127       | Lipe          | INSIDE                 | 1.613                                                        | 3.417                          | 2557.39            | 8738.93            | 5.511                          | 1874.40            | 10329.97           |
| A_68_P27787812 | chr11:50105519-50105563                           | NM_175334:298            | Maml1         | INSIDE                 | 1.613                                                        | 3.738                          | 461.82             | 1726.44            | 6.031                          | 391.72             | 2362.56            |
| A_68_P27280132 | chr10:79440564-79440611                           | NM_001003949:6488        | ORF61         | INSIDE                 | 1.613                                                        | 3.420                          | 396.18             | 1354.95            | 5.517                          | 305.43             | 1685.10            |
| A_68_P24173631 | chr5:148241874-148241918                          | NM_028291:-259           | Pan3          | PROMOTER               | 1.613                                                        | 2.699                          | 3211.48            | 8667.31            | 4.355                          | 2514.20            | 10948.12           |
| A_68_P27631993 | chr11:20443834-20443878                           | NM_021372:601            | Sertad2       | INSIDE                 | 1.613                                                        | 10.061                         | 10624.97           | 106902.70          | 16.231                         | 7456.42            | 121021.70          |
| A_68_P24046730 | chr5:122278610-122278654                          | NM_008507:8178           | Sh2b3         | INSIDE                 | 1.613                                                        | 4.679                          | 832.36             | 3894.34            | 7.546                          | 731.05             | 5516.12            |
| A_68_P23311001 | chr4:131830273-131830317                          | NM_025579:5              | Taf12         | INSIDE                 | 1.613                                                        | 11.344                         | 3315.90            | 37616.64           | 18.297                         | 2386.77            | 43669.74           |
| A_68_P20350529 | chr1:74838384-74838428                            | NM_009518:-186           | Wnt10a        | PROMOTER               | 1.613                                                        | 4.124                          | 4948.69            | 20405.98           | 6.653                          | 3730.25            | 24816.45           |
| A_68_P30499545 | chr15:102577606-102577650                         |                          |               | Unknown                | 1.613                                                        | 2.317                          | 1696.36            | 3931.06            | 3.738                          | 1417.87            | 5299.73            |
| A_68_P28889015 | chr13:24892904-24892948                           | NM_024473:-599           | BC005537      | PROMOTER               | 1.612                                                        | 2.710                          | 573.41             | 1553.95            | 4.369                          | 537.08             | 2346.26            |
| A_68_P32364032 | chrX:45694726-45694770                            | NM_178782:214            | Bcor1         | INSIDE                 | 1.612                                                        | 2.508                          | 1625.91            | 4078.50            | 4.044                          | 1095.53            | 4430.73            |
| A_68_P26536114 | chr9:56265361-56265405                            | NM_172924:475            | C230081A13Rik | INSIDE                 | 1.612                                                        | 3.543                          | 2542.05            | 9007.74            | 5.713                          | 1874.16            | 10706.98           |
| A_68_P31065266 | chr17:15513473-15513517                           | NM_007865:-707           | Dll1          | PROMOTER               | 1.612                                                        | 5.376                          | 1640.73            | 8821.10            | 8.668                          | 1157.08            | 10028.99           |
| A_68_P23927140 | chr5:100408133-100408177                          | NM_001077265:-197        | Hnrmpd        | PROMOTER               | 1.612                                                        | 1.778                          | 1719.81            | 3057.63            | 2.866                          | 1408.50            | 4036.58            |
| A_68_P23326917 | chr4:134708685-134708729                          | NM_019732:32147          | Rumx3         | INSIDE                 | 1.612                                                        | 3.639                          | 3739.75            | 13608.80           | 5.865                          | 2960.41            | 17362.93           |
| A_68_P27552432 | chr11:3417267-3417311                             | NM_053267:2584           | Selm          | INSIDE                 | 1.612                                                        | 2.862                          | 653.75             | 1870.73            | 4.613                          | 526.96             | 2431.08            |
| A_68_P31213521 | chr17:47809690-47809734                           | NM_198421:42074          | Usp49         | INSIDE                 | 1.612                                                        | 2.789                          | 2117.42            | 5904.90            | 4.496                          | 1779.78            | 8002.52            |
| A_68_P27926183 | chr11:75267995-75268039                           | NM_138950:203            | Wdr81         | INSIDE                 | 1.612                                                        | 1.934                          | 384.97             | 744.61             | 3.117                          | 383.70             | 1196.10            |
| A_68_P21103868 | chr2:30400904-30400948                            | ENSMUST00000145413:10678 |               | DOWNSTREAM             | 1.612                                                        | 2.044                          | 2240.78            | 4580.20            | 3.295                          | 1770.68            | 5834.67            |
| A_68_P20778066 | chr1:164408081-164408125                          | NM_001038619:59          | Dnm3          | INSIDE                 | 1.611                                                        | 2.867                          | 1051.30            | 3013.75            | 4.617                          | 792.73             | 3660.19            |
| A_68_P23966965 | chr5:107867055-107867099                          | NM_027599:6509           | Lpcat2b       | DOWNSTREAM             | 1.611                                                        | 5.020                          | 584.64             | 2934.97            | 8.088                          | 566.90             | 4585.04            |
| A_68_P31781216 | chr18:65590296-65590340                           | NM_172833:-332           | Malt1         | PROMOTER               | 1.611                                                        | 4.275                          | 3911.10            | 16718.62           | 6.885                          | 2564.32            | 17654.60           |
| A_68_P24329792 | chr6:29998675-29998719                            | NM_001164230:709         | Nrf1          | INSIDE                 | 1.611                                                        | 1.694                          | 1282.34            | 2172.15            | 2.730                          | 1075.63            | 2936.14            |
| A_68_P27993897 | chr11:87172172-87172216                           | NM_177167:302            | Ppm1e         | INSIDE                 | 1.611                                                        | 3.684                          | 1483.62            | 5465.32            | 5.934                          | 1280.66            | 7599.66            |
| A_68_P30580602 | chr16:18586865-18586909                           | NM_011532:176            | Tbx1          | INSIDE                 | 1.611                                                        | 3.668                          | 2181.79            | 8002.39            | 5.908                          | 1820.13            | 10753.60           |
| A_68_P27798408 | chr11:52096304-52096348                           | NM_009331:-574           | Tcf7          | PROMOTER               | 1.611                                                        | 1.663                          | 2733.97            | 4546.98            | 2.679                          | 2168.01            | 5807.09            |
| A_68_P23584753 | chr5:32913192-32913236                            | NM_001205132:-329        | Yes1          | PROMOTER               | 1.611                                                        | 2.569                          | 2853.62            | 7330.54            | 4.138                          | 2033.11            | 8412.94            |
| A_68_P24541220 | chr6:72297774-72297818                            | NM_026696:486            | 0610030E20Rik | INSIDE                 | 1.610                                                        | 5.030                          | 3501.90            | 17613.89           | 8.096                          | 2811.14            | 22758.40           |
| A_68_P27354277 | chr10:93002683-93002727                           | NM_027908:74             | Amdhd1        | INSIDE                 | 1.610                                                        | 2.369                          | 1000.49            | 2369.90            | 3.813                          | 822.61             | 3136.64            |
| A_68_P25951429 | chr8:72897357-72897401                            | NM_016685:-68            | Comp          | PROMOTER               | 1.610                                                        | 3.467                          | 1420.43            | 4924.30            | 5.580                          | 1152.70            | 6432.41            |
| A_68_P23226835 | chr4:115616658-115616702                          | NM_001025567:-4149       | Dmbx1         | PROMOTER               | 1.610                                                        | 3.342                          | 3326.32            | 11115.32           | 5.381                          | 2563.60            | 13794.61           |
| A_68_P29631109 | chr14:58617905-58617949                           | NM_028643:173            | Etha1         | INSIDE                 | 1.610                                                        | 2.344                          | 692.10             | 1622.39            | 3.773                          | 615.13             | 2321.20            |
| A_68_P21089590 | chr2:28048879-28048923                            | NM_001038614:288         | Olfm1         | INSIDE                 | 1.610                                                        | 1.554                          | 1325.05            | 2058.76            | 2.502                          | 1162.53            | 2908.28            |
| A_68_P31117688 | chr17:27792442-27792486                           | NM_011861:-162           | Pacsin1       | PROMOTER               | 1.610                                                        | 3.962                          | 687.38             | 2723.32            | 6.378                          | 565.99             | 3609.76            |
| A_68_P23298636 | chr4:129497126-129497170                          | NM_008974:-574           | Ptp4a2        | PROMOTER               | 1.610                                                        | 1.810                          | 1757.41            | 3181.61            | 2.915                          | 1435.54            | 4185.16            |
| A_68_P32975180 | chr9:108393143-108393187                          | NM_027804:158            | Usp19         | INSIDE                 | 1.610                                                        | 2.831                          | 1154.50            | 3268.25            | 4.559                          | 1078.28            | 4915.64            |
| A_68_P26129049 | chr8:107064933-107064977                          | NM_053070:248            | Car7          | INSIDE                 | 1.609                                                        | 4.243                          | 3692.17            | 15666.86           | 6.830                          | 2946.61            | 20123.93           |
| A_68_P21639427 | chr2:132088879-132088923                          | NM_138651:-92            | Cds2          | DIVERGENT_PROMOTER     | 1.609                                                        | 4.699                          | 469.43             | 2205.66            | 7.559                          | 401.49             | 3035.01            |
| A_68_P26141979 | chr8:109417535-109417579                          | NM_011574:17             | Cirh1a        | INSIDE                 | 1.609                                                        | 5.028                          | 1394.45            | 7010.82            | 8.089                          | 1220.21            | 9870.28            |
| A_68_P32454735 | chrX:68917753-68917797                            | NM_010340:833            | Gpr50         | INSIDE                 | 1.609                                                        | 2.705                          | 1139.03            | 3080.77            | 4.352                          | 599.11             | 2607.06            |
| A_68_P23588236 | chr5:33678553-33678599                            | NM_021500:356            | Maea          | INSIDE                 | 1.609                                                        | 5.083                          | 3030.57            | 15404.30           | 8.177                          | 2515.92            | 20572.74           |
| A_68_P24117361 | chr5:136164752-136164796                          | NM_008898:-309           | Por           | PROMOTER               | 1.609                                                        | 5.202                          | 3240.90            | 16858.04           | 8.370                          | 2280.86            | 19090.59           |
| A_68_P26805694 | chr9:106789235-106789279                          | NM_175402:75             | Rbm15b        | INSIDE                 | 1.609                                                        | 4.059                          | 394.04             | 1599.22            | 6.532                          | 333.52             | 2178.54            |
| A_68_P23158199 | chr4:101760754-101760798                          | ENSMUST00000106911:629   |               | INSIDE                 | 1.609                                                        | 4.814                          | 2102.05            | 10119.75           | 7.746                          | 2023.87            | 15677.45           |
| A_68_P29050103 | chr13:54666500-54666544                           | NM_133797:221            | 4833439L19Rik | INSIDE                 | 1.608                                                        | 6.099                          | 2522.42            | 15383.10           | 9.808                          | 1975.41            | 19375.44           |
| A_68_P25724841 | chr8:26127277-26127321                            | NM_007404:96             | Adam9         | INSIDE                 | 1.608                                                        | 2.741                          | 2955.35            | 8101.89            | 4.408                          | 2472.37            | 10898.08           |
| A_68_P28329059 | chr12:31758655-31758699                           | NM_027828:-156           | Fam110c       | PROMOTER               | 1.608                                                        | 2.881                          | 1404.76            | 4046.65            | 4.632                          | 1230.34            | 5698.63            |
| A_68_P20644877 | chr1:138156885-138156929                          | NM_001101516:544         | Gpr25         | INSIDE                 | 1.608                                                        | 1.686                          | 764.98             | 1289.80            | 2.712                          | 648.05             | 1757.37            |

| ProbeName      | Target position of probe on CpG island microarray | TargetID           | GeneSymbol    | CpG island Description | Ratio of relative methylation (TiO <sub>2</sub> -NP/Vehicle) | Sham group                     |                    |                    | TiO <sub>2</sub> -H group      |                    |                    |
|----------------|---------------------------------------------------|--------------------|---------------|------------------------|--------------------------------------------------------------|--------------------------------|--------------------|--------------------|--------------------------------|--------------------|--------------------|
|                |                                                   |                    |               |                        |                                                              | Relative methylation (Cy5/Cy3) | Cy3 signal (Input) | Cy5 signal (MeDIP) | Relative methylation (Cy5/Cy3) | Cy3 signal (Input) | Cy5 signal (MeDIP) |
| A_68_P25007878 | chr7:25800603-25800647                            | NM_008168:56764    | Grik5         | INSIDE                 | 1.608                                                        | 4.820                          | 2215.50            | 10677.62           | 7.749                          | 1490.88            | 11552.75           |
| A_68_P27182287 | chr10:61246439-61246483                           | NM_207000:152      | H2afy2        | INSIDE                 | 1.608                                                        | 3.190                          | 2241.58            | 7150.70            | 5.131                          | 1689.84            | 8670.31            |
| A_68_P25656224 | chr8:11557705-11557749                            | NM_011919:1661     | Ing1          | INSIDE                 | 1.608                                                        | 5.077                          | 2794.35            | 14186.40           | 8.162                          | 2248.83            | 18355.30           |
| A_68_P21137838 | chr2:35960787-35960831                            | NM_001083126:-1228 | Lhx6          | PROMOTER               | 1.608                                                        | 3.570                          | 1602.64            | 5721.08            | 5.740                          | 1283.41            | 7366.49            |
| A_68_P21428205 | chr2:92229093-92229137                            | NM_001202445:3726  | Mapk8ip1      | INSIDE                 | 1.608                                                        | 1.807                          | 2330.81            | 4212.43            | 2.905                          | 1815.98            | 5275.98            |
| A_68_P27922751 | chr11:74651412-74651456                           | NM_010813:7009     | Mnt           | INSIDE                 | 1.608                                                        | 4.731                          | 2325.84            | 11002.83           | 7.608                          | 1797.06            | 13671.47           |
| A_68_P26816174 | chr9:108594858-108594902                          | NM_008924:407      | Prkar2a       | INSIDE                 | 1.608                                                        | 2.779                          | 1177.52            | 3272.61            | 4.468                          | 955.42             | 4269.21            |
| A_68_P30379756 | chr15:81641379-81641423                           | NM_017376:-443     | Tef           | PROMOTER               | 1.608                                                        | 3.952                          | 12834.27           | 50717.44           | 6.355                          | 10155.86           | 64536.56           |
| A_68_P27446660 | chr10:110446716-110446760                         | NM_172554:384      | Zdhhc17       | INSIDE                 | 1.608                                                        | 1.530                          | 3567.01            | 5458.66            | 2.461                          | 2850.16            | 7014.34            |
| A_68_P25784087 | chr8:37210103-37210147                            | NM_172911:52243    | D8Ert82c      | INSIDE                 | 1.607                                                        | 4.243                          | 5872.86            | 24917.49           | 6.816                          | 4103.14            | 27967.73           |
| A_68_P26659813 | chr9:78328998-78329042                            | NM_010106:511      | Eef1a1        | INSIDE                 | 1.607                                                        | 1.741                          | 1728.57            | 3008.93            | 2.798                          | 1437.16            | 4021.22            |
| A_68_P29034741 | chr13:51941420-51941464                           | NM_011817:-601     | Gadd45g       | PROMOTER               | 1.607                                                        | 4.308                          | 2411.71            | 10388.75           | 6.924                          | 1861.97            | 12891.70           |
| A_68_P25471703 | chr7:128178649-128178693                          | NM_021554:712      | Mettl9        | INSIDE                 | 1.607                                                        | 8.648                          | 1551.29            | 13416.01           | 13.900                         | 1343.46            | 18673.87           |
| A_68_P23051091 | chr4:81088361-81088405                            | NM_010820:327      | Mpdz          | INSIDE                 | 1.607                                                        | 3.445                          | 10469.36           | 36066.76           | 5.537                          | 8861.19            | 49066.76           |
| A_68_P24618284 | chr6:87761631-87761675                            | NM_133717:-1904    | Rab43         | PROMOTER               | 1.607                                                        | 3.902                          | 5101.09            | 19903.73           | 6.270                          | 4202.66            | 26351.13           |
| A_68_P23999965 | chr5:114221529-114221573                          | NM_016926:108      | Sart3         | INSIDE                 | 1.607                                                        | 2.436                          | 1029.35            | 2507.68            | 3.916                          | 916.10             | 3587.48            |
| A_68_P21635209 | chr2:131317684-131317728                          | NM_001177833:109   | Smox          | INSIDE                 | 1.607                                                        | 7.670                          | 1752.26            | 13439.82           | 12.323                         | 1384.68            | 17062.93           |
| A_68_P32050810 | chr19:29122317-29122361                           | NM_021299:54       | Ak3           | INSIDE                 | 1.606                                                        | 6.341                          | 972.54             | 6167.01            | 10.181                         | 734.27             | 7475.93            |
| A_68_P23299955 | chr4:129724973-129725017                          | NM_028266:-89      | Col16a1       | PROMOTER               | 1.606                                                        | 3.786                          | 2438.22            | 9230.27            | 6.081                          | 2043.77            | 12427.41           |
| A_68_P29346593 | chr13:115249654-115249698                         | NM_008046:-738     | Fst           | PROMOTER               | 1.606                                                        | 2.498                          | 3716.50            | 9282.35            | 4.010                          | 2635.06            | 10566.83           |
| A_68_P31672402 | chr18:45719605-45719649                           | NM_080465:-181     | kenn2         | PROMOTER               | 1.606                                                        | 3.625                          | 3770.40            | 13666.74           | 5.820                          | 3126.64            | 18196.65           |
| A_68_P20620522 | chr1:134195663-134195707                          | NM_144810:482      | Klhdc8a       | INSIDE                 | 1.606                                                        | 3.422                          | 890.52             | 3047.47            | 5.495                          | 786.43             | 4321.27            |
| A_68_P21583618 | chr2:121781814-121781858                          | NM_008545:-8       | Mageb3        | DIVERGENT_PROMOTER     | 1.606                                                        | 1.769                          | 3483.81            | 6162.50            | 2.841                          | 2685.15            | 7628.37            |
| A_68_P31415143 | chr17:86567807-86567851                           | NM_011104:704      | Prkce         | INSIDE                 | 1.606                                                        | 2.633                          | 1510.89            | 3977.79            | 4.228                          | 1249.30            | 5282.05            |
| A_68_P25195707 | chr7:74904146-74904190                            | NM_183312:460      | Synn          | INSIDE                 | 1.606                                                        | 1.807                          | 1191.57            | 2153.03            | 2.902                          | 1015.20            | 2946.60            |
| A_68_P29210184 | chr13:89879184-89879228                           | NM_001081249:2911  | Vcan          | INSIDE                 | 1.606                                                        | 2.401                          | 503.61             | 1209.38            | 3.856                          | 446.94             | 1723.49            |
| A_68_P24620345 | chr6:88147159-88147203                            | NM_008090:-1477    | Gata2         | PROMOTER               | 1.605                                                        | 1.930                          | 784.07             | 1513.35            | 3.097                          | 737.04             | 2282.76            |
| A_68_P21957226 | chr3:14534076-14534120                            | NM_001163579:311   | Lrrcc1        | INSIDE                 | 1.605                                                        | 3.448                          | 2014.65            | 6946.97            | 5.533                          | 1548.92            | 8570.49            |
| A_68_P24428222 | chr6:48547522-48547566                            | NM_001079901:3663  | Repin1        | INSIDE                 | 1.605                                                        | 2.155                          | 589.84             | 1270.92            | 3.459                          | 464.36             | 1606.02            |
| A_68_P32601446 | chrX:109008521-109008565                          |                    |               | Unknown                | 1.605                                                        | 2.464                          | 449.98             | 1108.76            | 3.955                          | 314.96             | 1245.81            |
| A_68_P31620631 | chr18:36033282-36033326                           |                    |               | Unknown                | 1.605                                                        | 3.000                          | 1800.41            | 5401.85            | 4.815                          | 1442.62            | 6946.38            |
| A_68_P26166134 | chr8:113551628-113551672                          | NM_001190800:20    | Ddx19b        | INSIDE                 | 1.604                                                        | 2.542                          | 2363.69            | 6008.76            | 4.078                          | 1826.18            | 7447.29            |
| A_68_P31484539 | chr18:9212402-9212446                             | NM_008058:-429     | Fzd8          | PROMOTER               | 1.604                                                        | 2.193                          | 2083.27            | 4569.12            | 3.518                          | 1590.11            | 5594.11            |
| A_68_P27285907 | chr10:80317900-80317944                           | NM_025349:32       | Lsm7          | INSIDE                 | 1.604                                                        | 1.454                          | 1032.35            | 1501.36            | 2.333                          | 818.51             | 1909.53            |
| A_68_P29668497 | chr14:65206255-65206299                           | NR_029813:-3217    | Mir124a-1     | PROMOTER               | 1.604                                                        | 3.902                          | 7366.35            | 28747.14           | 6.258                          | 4975.08            | 31133.68           |
| A_68_P24135185 | chr5:139847981-139848025                          | NR_029768:-2303    | Mir339        | DIVERGENT_PROMOTER     | 1.604                                                        | 3.796                          | 2433.75            | 9238.48            | 6.087                          | 2046.61            | 12458.24           |
| A_68_P26345770 | chr9:20970026-20970070                            | NM_183408:-109     | Pde4a         | PROMOTER               | 1.604                                                        | 5.969                          | 970.27             | 5791.23            | 9.573                          | 837.83             | 8020.49            |
| A_68_P21149540 | chr2:38499397-38499441                            | NM_011187:8        | Psmb7         | INSIDE                 | 1.604                                                        | 2.174                          | 2497.94            | 5429.94            | 3.487                          | 1906.18            | 6647.51            |
| A_68_P23415826 | chr4:151363053-151363098                          | NM_001145929:20    | Thap3         | INSIDE                 | 1.604                                                        | 1.650                          | 491.30             | 810.45             | 2.646                          | 399.61             | 1057.32            |
| A_68_P26814405 | chr9:108250089-108250133                          | NM_011678:-51      | Usp4          | PROMOTER               | 1.604                                                        | 2.988                          | 1313.14            | 3923.16            | 4.793                          | 1096.62            | 5256.58            |
| A_68_P30476410 | chr15:98608643-98608687                           | NM_011718:-83      | Wnt10b        | PROMOTER               | 1.604                                                        | 1.353                          | 4751.71            | 6428.46            | 2.170                          | 3765.60            | 8171.33            |
| A_68_P21812641 | chr2:163298061-163298105                          | NR_028122:-198     | 2310001K24Rik | PROMOTER               | 1.603                                                        | 2.860                          | 1751.00            | 5008.06            | 4.586                          | 1461.56            | 6702.35            |
| A_68_P21111049 | chr2:31615339-31615383                            | NM_009594:-104     | Ab1l          | PROMOTER               | 1.603                                                        | 1.565                          | 1024.47            | 1603.78            | 2.510                          | 855.67             | 2147.89            |
| A_68_P30026213 | chr15:13102919-13102963                           | NM_007666:454      | Cdh6          | INSIDE                 | 1.603                                                        | 2.861                          | 2518.02            | 7205.20            | 4.586                          | 2042.09            | 9365.27            |
| A_68_P32322121 | chrX:34731184-34731228                            | NM_019443:27       | Ndufa1        | INSIDE                 | 1.603                                                        | 1.735                          | 1435.26            | 2490.36            | 2.782                          | 880.76             | 2449.86            |
| A_68_P28538315 | chr12:74685369-74685413                           | NM_008856:-637     | Prkch         | PROMOTER               | 1.603                                                        | 4.059                          | 997.12             | 4046.86            | 6.506                          | 734.71             | 4779.80            |
| A_68_P27222450 | chr10:68675577-68675621                           | NM_001081347:194   | Rhobtb1       | INSIDE                 | 1.603                                                        | 3.581                          | 5360.76            | 19199.15           | 5.739                          | 4084.46            | 23442.44           |
| A_68_P30976720 | chr16:93603886-93603930                           | NM_145482:152      | Setd4         | INSIDE                 | 1.603                                                        | 4.985                          | 4901.08            | 24430.88           | 7.990                          | 3852.54            | 30782.88           |
| A_68_P20872220 | chr1:181733104-181733148                          | NM_026375:1020     | Ahetf1        | INSIDE                 | 1.602                                                        | 2.264                          | 1393.41            | 3155.16            | 3.628                          | 1213.64            | 4402.86            |
| A_68_P27311154 | chr10:85391524-85391568                           | NM_001163614:311   | Asc4          | INSIDE                 | 1.602                                                        | 2.795                          | 359.07             | 1003.47            | 4.477                          | 296.83             | 1328.85            |
| A_68_P23299678 | chr4:129683985-129684029                          | NM_001199696:21685 | Bai2          | INSIDE                 | 1.602                                                        | 2.638                          | 709.65             | 1872.38            | 4.226                          | 588.49             | 2486.74            |

| ProbeName      | Target position of probe on CpG island microarray | TargetID                 | GeneSymbol    | CpG island Description | Ratio of relative methylation (TiO <sub>2</sub> -NP/Vehicle) | Sham group                     |                    |                    | TiO <sub>2</sub> -H group      |                    |                    |
|----------------|---------------------------------------------------|--------------------------|---------------|------------------------|--------------------------------------------------------------|--------------------------------|--------------------|--------------------|--------------------------------|--------------------|--------------------|
|                |                                                   |                          |               |                        |                                                              | Relative methylation (Cy5/Cy3) | Cy3 signal (Input) | Cy5 signal (MeDIP) | Relative methylation (Cy5/Cy3) | Cy3 signal (Input) | Cy5 signal (MeDIP) |
| A_68_P30567436 | chr16:15887941-15887985                           | NM_007679:584            | Cebpd         | INSIDE                 | 1.602                                                        | 4.663                          | 696.93             | 3249.69            | 7.469                          | 603.47             | 4507.38            |
| A_68_P20148715 | chr1:36568684-36568728                            | NM_001039551:-14         | Cnmm3         | PROMOTER               | 1.602                                                        | 2.142                          | 3211.45            | 6880.19            | 3.431                          | 2505.82            | 8597.79            |
| A_68_P32463877 | chrX:70882835-70882879                            | NM_029352:-1923          | Dusp9         | PROMOTER               | 1.602                                                        | 2.572                          | 789.86             | 2031.39            | 4.119                          | 437.53             | 1802.33            |
| A_68_P27083091 | chr10:39977457-39977501                           | NM_026113:-7             | Gtf3c6        | PROMOTER               | 1.602                                                        | 3.173                          | 3397.42            | 10778.73           | 5.083                          | 2673.04            | 13586.99           |
| A_68_P24541702 | chr6:72388860-72388904                            | NM_145569:670            | Mat2a         | INSIDE                 | 1.602                                                        | 2.735                          | 1124.77            | 3076.39            | 4.383                          | 983.64             | 4311.30            |
| A_68_P27938848 | chr11:77500486-77500530                           | NM_001024205:868         | Nufip2        | INSIDE                 | 1.602                                                        | 2.017                          | 1984.94            | 4004.32            | 3.232                          | 1657.94            | 5359.11            |
| A_68_P24323855 | chr6:28931080-28931124                            | ENSMUST00000164104:-531  |               | PROMOTER               | 1.602                                                        | 1.361                          | 1615.01            | 2197.83            | 2.181                          | 1235.55            | 2694.25            |
| A_68_P29005211 | chr13:46061364-46061408                           | NM_009124:-1041          | Atxn1         | PROMOTER               | 1.601                                                        | 3.328                          | 3978.55            | 13239.55           | 5.327                          | 2945.77            | 15691.53           |
| A_68_P22030511 | chr3:30755072-30755116                            | NM_001134385:223         | Gpr160        | INSIDE                 | 1.601                                                        | 4.571                          | 796.20             | 3639.25            | 7.317                          | 677.92             | 4960.23            |
| A_68_P30572653 | chr16:17233627-17233671                           | NM_178922:-31            | Hic2          | PROMOTER               | 1.601                                                        | 4.792                          | 2127.46            | 10194.96           | 7.674                          | 1775.80            | 13627.26           |
| A_68_P26016967 | chr8:86424037-86424081                            | NM_181039:62             | Lphn1         | INSIDE                 | 1.601                                                        | 3.211                          | 2264.65            | 7272.80            | 5.141                          | 2047.70            | 10527.10           |
| A_68_P23264207 | chr4:123341175-123341219                          | NM_001199136:20407       | Macf1         | INSIDE                 | 1.601                                                        | 2.225                          | 1197.98            | 2665.43            | 3.563                          | 1057.07            | 3766.45            |
| A_68_P32777676 | chrX:156426760-156426804                          | NM_001163085:418         | Map3k15       | INSIDE                 | 1.601                                                        | 3.482                          | 3434.14            | 11957.67           | 5.574                          | 2209.75            | 12316.96           |
| A_68_P23316515 | chr4:132797012-132797056                          | NM_016693:302            | Map3k6        | INSIDE                 | 1.601                                                        | 3.752                          | 940.36             | 3528.30            | 6.005                          | 814.28             | 4889.99            |
| A_68_P23936340 | chr5:102094274-102094318                          | NM_144955:-566           | Nkx6-1        | PROMOTER               | 1.601                                                        | 2.012                          | 1254.18            | 2523.11            | 3.222                          | 1064.57            | 3429.80            |
| A_68_P23398659 | chr4:148473653-148473697                          | NM_019781:247            | Pex14         | INSIDE                 | 1.601                                                        | 3.023                          | 1074.05            | 3246.82            | 4.840                          | 773.96             | 3745.89            |
| A_68_P23308582 | chr4:131392468-131392512                          | NM_001083119:1703        | Ptpnu         | INSIDE                 | 1.601                                                        | 2.243                          | 2002.36            | 4491.97            | 3.592                          | 1510.32            | 5425.13            |
| A_68_P30394811 | chr15:84276781-84276825                           | NM_001163145:725         | 1810041L15Rik | INSIDE                 | 1.600                                                        | 3.955                          | 1864.88            | 7375.82            | 6.327                          | 1441.31            | 9119.27            |
| A_68_P26344263 | chr9:20672999-20673043                            | NM_175687:-65            | A230050P20Rik | PROMOTER               | 1.600                                                        | 11.633                         | 911.91             | 10608.40           | 18.613                         | 684.93             | 12748.62           |
| A_68_P26816895 | chr9:108734927-108734971                          | NM_080437:6298           | Celsr3        | INSIDE                 | 1.600                                                        | 4.517                          | 3492.77            | 15777.49           | 7.229                          | 2474.22            | 17885.33           |
| A_68_P26313788 | chr9:13632555-13632599                            | NM_176836:406            | Fam76b        | INSIDE                 | 1.600                                                        | 1.733                          | 1041.18            | 1804.15            | 2.773                          | 816.41             | 2263.88            |
| A_68_P29031120 | chr13:51266739-51266783                           | NM_029173:367            | Nxn12         | INSIDE                 | 1.600                                                        | 3.920                          | 2615.10            | 10251.94           | 6.274                          | 2115.39            | 13272.40           |
| A_68_P21762360 | chr2:154616838-154616882                          | NM_001139511:15          | Raly          | INSIDE                 | 1.600                                                        | 2.771                          | 2007.08            | 5561.51            | 4.434                          | 1712.11            | 7591.07            |
| A_68_P26811550 | chr9:107775126-107775170                          | NM_011251:2              | Rbm6          | INSIDE                 | 1.600                                                        | 4.161                          | 612.46             | 2548.65            | 6.658                          | 519.94             | 3641.97            |
| A_68_P24691293 | chr6:100237792-100237836                          | NM_019743:-462           | Rybp          | PROMOTER               | 1.600                                                        | 3.966                          | 2131.78            | 8453.78            | 6.345                          | 1704.68            | 10815.92           |
| A_68_P31868107 | chr18:81182856-81182900                           | NM_178280:439            | Sall3         | INSIDE                 | 1.600                                                        | 3.902                          | 3523.83            | 13749.52           | 6.244                          | 2824.25            | 17633.53           |
| A_68_P22872185 | chr4:43536399-43536443                            | NM_009416:-160           | Tpm2          | PROMOTER               | 1.600                                                        | 2.434                          | 1937.75            | 4715.58            | 3.894                          | 1520.65            | 5921.09            |
| A_68_P23756659 | chr5:65883667-65883711                            | NM_133697:386            | 1110003E01Rik | INSIDE                 | 1.599                                                        | 1.904                          | 7260.24            | 13825.18           | 3.044                          | 6186.80            | 18835.45           |
| A_68_P20258663 | chr1:58450520-58450564                            | NM_025824:563            | Bzw1          | INSIDE                 | 1.599                                                        | 3.266                          | 2398.42            | 7833.03            | 5.223                          | 2083.81            | 10883.14           |
| A_68_P32576286 | chrX:101396172-101396216                          | NM_001077354:262         | C77370        | INSIDE                 | 1.599                                                        | 4.081                          | 7479.24            | 30522.25           | 6.527                          | 6051.21            | 39497.18           |
| A_68_P30010737 | chr15:10399801-10399845                           | NM_030046:449            | Dnajc21       | INSIDE                 | 1.599                                                        | 4.759                          | 1474.51            | 7017.39            | 7.611                          | 1290.18            | 9819.95            |
| A_68_P25023124 | chr7:29478378-29478422                            | NM_001163702:238         | Fbxo27        | INSIDE                 | 1.599                                                        | 1.525                          | 1881.91            | 2870.40            | 2.439                          | 1510.43            | 3683.48            |
| A_68_P23433055 | chr4:154011802-154011846                          | NM_001177995:-842        | Prdm16        | PROMOTER               | 1.599                                                        | 6.269                          | 1955.43            | 12259.20           | 10.026                         | 1598.27            | 16024.05           |
| A_68_P23407012 | chr4:149943746-149943790                          | NM_001085492:287744      | Rere          | INSIDE                 | 1.599                                                        | 1.670                          | 531.33             | 887.33             | 2.670                          | 426.21             | 1138.07            |
| A_68_P22614971 | chr3:146162605-146162649                          | NM_027617:91             | Spata1        | INSIDE                 | 1.599                                                        | 3.443                          | 830.28             | 2858.85            | 5.504                          | 725.21             | 3991.58            |
| A_68_P23929552 | chr5:100858837-100858881                          | NR_034038:-304           | 5430416N02Rik | PROMOTER               | 1.598                                                        | 4.386                          | 2091.10            | 9170.96            | 7.010                          | 1771.53            | 12417.68           |
| A_68_P23319354 | chr4:133310209-133310253                          | NM_001080819:-704        | Arid1a        | PROMOTER               | 1.598                                                        | 2.197                          | 3613.68            | 7937.87            | 3.510                          | 2699.47            | 9473.94            |
| A_68_P30362677 | chr15:78672776-78672820                           | NM_027219:-278           | Cdc42ep1      | PROMOTER               | 1.598                                                        | 2.451                          | 661.26             | 1620.50            | 3.915                          | 598.40             | 2342.69            |
| A_68_P30356227 | chr15:77672647-77672691                           | NM_022410:-123           | Myh9          | PROMOTER               | 1.598                                                        | 4.863                          | 5861.69            | 28505.42           | 7.773                          | 4607.92            | 35815.21           |
| A_68_P30458778 | chr15:95358757-95358801                           | NM_016743:359            | Nell2         | INSIDE                 | 1.598                                                        | 2.298                          | 4531.86            | 10413.47           | 3.672                          | 3655.64            | 13422.68           |
| A_68_P27178875 | chr10:60609327-60609371                           | NM_009163:1065           | Sgp11         | INSIDE                 | 1.598                                                        | 1.769                          | 2592.83            | 4587.47            | 2.828                          | 2049.41            | 5795.72            |
| A_68_P23072589 | chr4:84851297-84851341                            | NM_019535:-41            | Sh3gl2        | PROMOTER               | 1.598                                                        | 1.967                          | 485.40             | 954.70             | 3.142                          | 462.98             | 1454.73            |
| A_68_P29418922 | chr14:14794169-14794213                           | NM_025435:-451           | Thoc7         | PROMOTER               | 1.598                                                        | 2.309                          | 2178.68            | 5030.69            | 3.690                          | 1673.07            | 6174.15            |
| A_68_P22875967 | chr4:44246168-44246212                            | ENSMUST00000123844:-5006 |               | PROMOTER               | 1.598                                                        | 5.630                          | 5663.68            | 31884.31           | 8.996                          | 4334.87            | 38996.60           |
| A_68_P20877466 | chr1:182655892-182655936                          | NM_133225:-259           | Acbd3         | PROMOTER               | 1.597                                                        | 4.420                          | 1550.19            | 6851.39            | 7.057                          | 1414.09            | 9978.61            |
| A_68_P23316365 | chr4:132768551-132768595                          | NM_008154:-121           | Gpr3          | DIVERGENT_PROMOTER     | 1.597                                                        | 4.311                          | 3132.85            | 13506.40           | 6.884                          | 2790.16            | 19208.65           |
| A_68_P26228655 | chr8:124277307-124277351                          | NM_020605:22870          | Jph3          | INSIDE                 | 1.597                                                        | 4.386                          | 798.68             | 3502.79            | 7.004                          | 595.82             | 4173.10            |
| A_68_P31259695 | chr17:57170806-57170850                           | NM_010613:102            | Khsrp         | INSIDE                 | 1.597                                                        | 4.699                          | 2028.91            | 9532.99            | 7.505                          | 1900.29            | 14262.48           |
| A_68_P25727982 | chr8:26707741-26707785                            | NM_173012:197            | Letm2         | INSIDE                 | 1.597                                                        | 5.315                          | 1145.84            | 6090.24            | 8.487                          | 988.09             | 8386.39            |
| A_68_P31790832 | chr18:67404825-67404869                           | NM_172630:638            | Mppe1         | INSIDE                 | 1.597                                                        | 2.013                          | 1640.63            | 3302.46            | 3.214                          | 1469.60            | 4723.63            |
| A_68_P25007073 | chr7:25669913-25669957                            | NM_023133:202            | Rps19         | INSIDE                 | 1.597                                                        | 3.412                          | 1484.11            | 5063.19            | 5.450                          | 1292.39            | 7043.04            |



| ProbeName      | Target position of probe on CpG island microarray | TargetID                | GeneSymbol    | CpG island Description | Ratio of relative methylation (TiO <sub>2</sub> -NP/Vehicle) | Sham group                     |                    |                    | TiO <sub>2</sub> -H group      |                    |                    |
|----------------|---------------------------------------------------|-------------------------|---------------|------------------------|--------------------------------------------------------------|--------------------------------|--------------------|--------------------|--------------------------------|--------------------|--------------------|
|                |                                                   |                         |               |                        |                                                              | Relative methylation (Cy5/Cy3) | Cy3 signal (Input) | Cy5 signal (MeDIP) | Relative methylation (Cy5/Cy3) | Cy3 signal (Input) | Cy5 signal (MeDIP) |
| A_68_P32010020 | chr19:22213374-22213418                           | NM_001035239-210        | Trpm3         | PROMOTER               | 1.597                                                        | 2.658                          | 1036.70            | 2755.98            | 4.245                          | 859.73             | 3649.29            |
| A_68_P28731667 | chr12:110291510-110291554                         | NM_001163175:14895      | Begain        | INSIDE                 | 1.596                                                        | 2.689                          | 2110.52            | 5675.94            | 4.291                          | 1760.86            | 7556.49            |
| A_68_P22729559 | chr4:11315357-11315401                            | NM_194055-1448          | Esrp1         | PROMOTER               | 1.596                                                        | 1.674                          | 934.79             | 1565.25            | 2.673                          | 741.88             | 1982.85            |
| A_68_P28767111 | chr12:117519591-117519635                         | NM_028731--82           | Eysy2         | PROMOTER               | 1.596                                                        | 2.903                          | 1504.28            | 4366.28            | 4.632                          | 1093.98            | 5067.52            |
| A_68_P23145563 | chr4:99324552-99324596                            | NM_010425-1585          | Foxd3         | INSIDE                 | 1.596                                                        | 1.997                          | 1989.00            | 3971.76            | 3.187                          | 1744.74            | 5559.83            |
| A_68_P27560010 | chr11:4749422-4749466                             | NM_010898-86            | Nf2           | INSIDE                 | 1.596                                                        | 2.351                          | 3344.47            | 7862.57            | 3.752                          | 2818.67            | 10576.64           |
| A_68_P30568393 | chr16:16213292-16213336                           | NM_026163--123          | Pkp2          | PROMOTER               | 1.596                                                        | 2.621                          | 1302.42            | 3413.60            | 4.184                          | 1066.08            | 4460.33            |
| A_68_P21142183 | chr2:37307736-37307780                            | NM_001033960--15        | Rabgap1       | PROMOTER               | 1.596                                                        | 5.228                          | 3556.66            | 18595.17           | 8.346                          | 2877.40            | 24014.49           |
| A_68_P28685879 | chr12:102321594-102321638                         | NM_001160214:296        | Smek1         | INSIDE                 | 1.596                                                        | 2.273                          | 1733.74            | 3940.91            | 3.627                          | 1557.98            | 5650.62            |
| A_68_P28614745 | chr12:88540669-88540713                           | NM_001033475:489        | Tmed8         | INSIDE                 | 1.596                                                        | 5.480                          | 3474.84            | 19041.55           | 8.745                          | 2597.15            | 22713.11           |
| A_68_P20151305 | chr1:36996651-36996695                            | NM_018872--300          | Tmem131       | PROMOTER               | 1.596                                                        | 2.608                          | 1176.45            | 3067.66            | 4.162                          | 972.02             | 4045.50            |
| A_68_P21622816 | chr2:128891587-128891631                          | NM_027192--74           | Ttl           | PROMOTER               | 1.596                                                        | 4.591                          | 2434.91            | 11177.48           | 7.325                          | 1775.89            | 13008.52           |
| A_68_P26276227 | chr9:4260687-4260731                              |                         |               | Unknown                | 1.596                                                        | 3.594                          | 1726.01            | 6204.06            | 5.737                          | 1444.73            | 8288.80            |
| A_68_P31326351 | chr17:70318541-70318585                           | ENSMUST00000060072--23  |               | PROMOTER               | 1.596                                                        | 2.290                          | 406.10             | 929.83             | 3.655                          | 342.56             | 1252.03            |
| A_68_P23817349 | chr5:77087036-77087080                            | ENSMUST00000125922:313  |               | INSIDE                 | 1.596                                                        | 3.109                          | 1045.08            | 3248.75            | 4.961                          | 938.76             | 4656.77            |
| A_68_P31157711 | chr17:35257720-35257764                           | NM_009975:650           | Csnk2b        | INSIDE                 | 1.595                                                        | 1.882                          | 2747.60            | 5172.15            | 3.002                          | 1920.74            | 5766.73            |
| A_68_P22942456 | chr4:56959870-56959914                            | NM_175518:409           | D730040F13Rik | INSIDE                 | 1.595                                                        | 6.093                          | 791.80             | 4824.54            | 9.717                          | 707.64             | 6876.09            |
| A_68_P20613818 | chr1:133034787-133034831                          | NM_145508:3             | Dyrk3         | INSIDE                 | 1.595                                                        | 2.262                          | 671.25             | 1518.37            | 3.608                          | 591.10             | 2132.62            |
| A_68_P27897958 | chr11:69734258-69734302                           | NM_001166590--148       | Eif5a         | PROMOTER               | 1.595                                                        | 4.279                          | 6778.16            | 29002.29           | 6.825                          | 5191.36            | 35430.35           |
| A_68_P32684282 | chrX:133653782-133653826                          | NM_007957:1061          | Esx1          | INSIDE                 | 1.595                                                        | 3.270                          | 3979.99            | 13014.37           | 5.216                          | 2354.09            | 12279.98           |
| A_68_P27281299 | chr10:79613231-79613275                           | NM_021565:2218          | Midn          | INSIDE                 | 1.595                                                        | 1.942                          | 729.15             | 1415.90            | 3.097                          | 609.84             | 1888.57            |
| A_68_P31112722 | chr17:26978019-26978063                           | NM_008700:470           | Nkx2-5        | INSIDE                 | 1.595                                                        | 2.654                          | 1733.03            | 4599.01            | 4.234                          | 1351.92            | 5723.70            |
| A_68_P23694283 | chr5:52759912-52759956                            | NM_011435:4892          | Sod3          | INSIDE                 | 1.595                                                        | 4.202                          | 2347.88            | 9864.82            | 6.699                          | 1963.26            | 13152.84           |
| A_68_P27985587 | chr11:85651691-85651735                           | NM_009324:5596          | Tbx2          | INSIDE                 | 1.595                                                        | 1.611                          | 1802.26            | 2903.35            | 2.570                          | 1401.10            | 3600.16            |
| A_68_P22948244 | chr4:57969284-57969328                            | NM_011660--23           | Txn1          | PROMOTER               | 1.595                                                        | 3.002                          | 664.99             | 1996.03            | 4.788                          | 619.35             | 2965.60            |
| A_68_P30476328 | chr15:98593484-98593528                           | NM_007478:43            | Arf3          | INSIDE                 | 1.594                                                        | 2.018                          | 3901.49            | 7874.01            | 3.216                          | 3017.31            | 9704.51            |
| A_68_P32573854 | chrX:100810244-100810288                          | NR_028381:8827          | B230206F22Rik | INSIDE                 | 1.594                                                        | 4.072                          | 8298.88            | 33789.92           | 6.490                          | 3713.15            | 24097.37           |
| A_68_P25655858 | chr8:11497803-11497847                            | NM_026995:257           | Carkd         | INSIDE                 | 1.594                                                        | 2.684                          | 1919.84            | 5153.21            | 4.279                          | 1524.74            | 6524.19            |
| A_68_P28083428 | chr11:102977758-102977802                         | NM_138753:142           | Hexim1        | INSIDE                 | 1.594                                                        | 1.775                          | 3158.02            | 5605.34            | 2.830                          | 2549.73            | 7215.73            |
| A_68_P28397452 | chr12:45429719-45429763                           | NM_001146031--131       | Nrcam         | PROMOTER               | 1.594                                                        | 3.036                          | 974.16             | 2957.82            | 4.838                          | 883.91             | 4276.75            |
| A_68_P25411125 | chr7:117129431-117129475                          | NM_153525:292           | Tmem41b       | INSIDE                 | 1.594                                                        | 2.631                          | 4442.00            | 11687.76           | 4.195                          | 3120.46            | 13091.02           |
| A_68_P27589635 | chr11:11013930-11013974                           | NM_177033--66           | Vvc2          | PROMOTER               | 1.594                                                        | 2.232                          | 460.96             | 1029.09            | 3.559                          | 447.80             | 1593.57            |
| A_68_P21751445 | chr2:152656855-152656899                          | NM_009743:542           | Bcl2l1        | INSIDE                 | 1.593                                                        | 2.403                          | 439.51             | 1056.14            | 3.828                          | 385.97             | 1477.30            |
| A_68_P26971601 | chr10:17443503-17443547                           | NM_010828:491           | Cited2        | INSIDE                 | 1.593                                                        | 1.437                          | 1021.65            | 1468.46            | 2.290                          | 866.24             | 1983.53            |
| A_68_P23587982 | chr5:33618039-33618083                            | NM_001198859--407       | Ctbp1         | PROMOTER               | 1.593                                                        | 2.427                          | 696.54             | 1690.79            | 3.867                          | 582.42             | 2252.40            |
| A_68_P24171442 | chr5:147840909-147840953                          | NM_080795:47218         | Lnx2          | INSIDE                 | 1.593                                                        | 2.871                          | 522.01             | 1498.70            | 4.572                          | 468.43             | 2141.74            |
| A_68_P23577160 | chr5:31522948-31522992                            | NM_008014--52           | Ppm1g         | PROMOTER               | 1.593                                                        | 5.580                          | 2910.39            | 16240.42           | 8.892                          | 2461.09            | 21883.42           |
| A_68_P31759815 | chr18:61946490-61946534                           | NM_178928--196          | Afap111       | PROMOTER               | 1.592                                                        | 1.383                          | 1416.45            | 1959.53            | 2.203                          | 1122.92            | 2473.79            |
| A_68_P27835630 | chr11:59041516-59041560                           | NM_001130408:126        | Arf1          | INSIDE                 | 1.592                                                        | 2.033                          | 1722.66            | 3502.46            | 3.236                          | 1427.13            | 4618.53            |
| A_68_P32533249 | chrX:90540139-90540183                            | NM_007492:8176          | Arx           | INSIDE                 | 1.592                                                        | 2.504                          | 1322.93            | 3312.11            | 3.985                          | 969.13             | 3861.84            |
| A_68_P21704233 | chr2:143740849-143740894                          | NM_019771--195          | Dstn          | PROMOTER               | 1.592                                                        | 3.379                          | 3450.55            | 11659.34           | 5.380                          | 2818.76            | 15163.67           |
| A_68_P29259683 | chr13:99585179-99585223                           | NM_172591:204           | Fcho2         | INSIDE                 | 1.592                                                        | 4.182                          | 1087.69            | 4548.58            | 6.660                          | 923.46             | 6149.83            |
| A_68_P31922932 | chr19:4396607-4396651                             | NM_001001984:449        | Kdm2a         | INSIDE                 | 1.592                                                        | 2.723                          | 3295.26            | 8971.97            | 4.335                          | 2770.30            | 12010.53           |
| A_68_P28051873 | chr11:97521768-97521812                           | NM_139311--2935         | Mllt6         | PROMOTER               | 1.592                                                        | 4.326                          | 636.54             | 2753.65            | 6.886                          | 596.03             | 4104.36            |
| A_68_P30346592 | chr15:76009110-76009154                           | NM_201394:17008         | Plec          | INSIDE                 | 1.592                                                        | 3.611                          | 372.29             | 1344.43            | 5.748                          | 317.36             | 1824.20            |
| A_68_P27565811 | chr11:5855744-5855788                             | NM_019661:6             | Ykt6          | INSIDE                 | 1.592                                                        | 1.660                          | 494.53             | 820.84             | 2.643                          | 392.71             | 1037.95            |
| A_68_P22129179 | chr3:51145355-51145399                            | ENSMUST00000135496--796 |               | PROMOTER               | 1.592                                                        | 2.407                          | 1351.50            | 3253.62            | 3.832                          | 1112.68            | 4263.75            |
| A_68_P26022004 | chr8:87323463-87323507                            | NM_001081982:755        | Nfix          | INSIDE                 | 1.591                                                        | 1.494                          | 801.96             | 1198.24            | 2.377                          | 743.63             | 1767.40            |
| A_68_P24643143 | chr6:92042164-92042208                            | NM_011630:775           | Nr2c2         | INSIDE                 | 1.591                                                        | 2.293                          | 1246.91            | 2859.03            | 3.649                          | 1034.35            | 3774.36            |
| A_68_P29057251 | chr13:55927242-55927286                           | NM_011097:5522          | Pitx1         | INSIDE                 | 1.591                                                        | 2.076                          | 628.89             | 1305.28            | 3.303                          | 520.93             | 1720.60            |
| A_68_P31067776 | chr17:15968184-15968228                           | NM_178615--4656         | Rgmb          | PROMOTER               | 1.591                                                        | 2.104                          | 1439.15            | 3027.84            | 3.347                          | 1305.65            | 4370.41            |

| ProbeName      | Target position of probe on CpG island microarray | TargetID           | GeneSymbol | CpG island Description | Ratio of relative methylation (TiO <sub>2</sub> -NP/Vehicle) | Sham group                     |                    |                    | TiO <sub>2</sub> -H group      |                    |                    |
|----------------|---------------------------------------------------|--------------------|------------|------------------------|--------------------------------------------------------------|--------------------------------|--------------------|--------------------|--------------------------------|--------------------|--------------------|
|                |                                                   |                    |            |                        |                                                              | Relative methylation (Cy5/Cy3) | Cy3 signal (Input) | Cy5 signal (MeDIP) | Relative methylation (Cy5/Cy3) | Cy3 signal (Input) | Cy5 signal (MeDIP) |
| A_68_P26533458 | chr9:55785595-55785639                            | NM_001081341:306   | Scaper     | INSIDE                 | 1.591                                                        | 1.692                          | 6215.45            | 10515.26           | 2.692                          | 5095.27            | 13718.22           |
| A_68_P24124227 | chr5:137507750-137507794                          | NM_001039385:1608  | Vgf        | INSIDE                 | 1.591                                                        | 6.809                          | 422.38             | 2876.05            | 10.831                         | 459.61             | 4978.05            |
| A_68_P30578495 | chr16:18235059-18235103                           | NM_172151:149      | Zdhhc8     | INSIDE                 | 1.591                                                        | 2.521                          | 1763.98            | 4446.77            | 4.011                          | 1455.75            | 5839.54            |
| A_68_P30347864 | chr15:76199968-76200012                           | NM_021555:663      | Fam203a    | INSIDE                 | 1.590                                                        | 1.972                          | 711.02             | 1402.24            | 3.137                          | 582.35             | 1826.67            |
| A_68_P32117383 | chr19:41905096-41905140                           | NM_008043:659      | Frat1      | INSIDE                 | 1.590                                                        | 2.682                          | 1948.71            | 5227.13            | 4.264                          | 1756.91            | 7491.10            |
| A_68_P30148784 | chr15:38228806-38228850                           | NM_013692:1634     | Klf10      | INSIDE                 | 1.590                                                        | 2.565                          | 2289.00            | 5871.06            | 4.079                          | 1935.98            | 7897.38            |
| A_68_P24434512 | chr6:49772812-49772856                            | NM_023456:107      | Npy        | INSIDE                 | 1.590                                                        | 2.141                          | 2840.99            | 6083.61            | 3.405                          | 2464.85            | 8391.72            |
| A_68_P33008139 | A_68_P33008139                                    |                    |            | Unknown                | 1.590                                                        | 3.923                          | 9272.31            | 36375.59           | 6.238                          | 6729.01            | 41976.06           |
| A_68_P23467734 | chr5:8367164-8367208                              | NM_001098225:895   | Adam22     | INSIDE                 | 1.589                                                        | 2.734                          | 1717.39            | 4695.16            | 4.344                          | 1279.99            | 5560.36            |
| A_68_P20231549 | chr1:53409460-53409504                            | NM_133728:61       | Asnsd1     | INSIDE                 | 1.589                                                        | 4.459                          | 1548.31            | 6903.98            | 7.087                          | 1276.77            | 9049.05            |
| A_68_P30478144 | chr15:98917975-98918019                           | NM_001024702:163   | C1ql4      | INSIDE                 | 1.589                                                        | 10.977                         | 841.38             | 9235.98            | 17.442                         | 720.72             | 12570.65           |
| A_68_P20885895 | chr1:184212870-184212914                          | NM_007853:-2       | Degs1      | PROMOTER               | 1.589                                                        | 9.939                          | 456.85             | 4540.71            | 15.794                         | 377.16             | 5956.78            |
| A_68_P27475787 | chr10:115911149-115911205                         | NM_021452:-597     | Kenmb4     | PROMOTER               | 1.589                                                        | 2.152                          | 256.78             | 552.55             | 3.418                          | 188.17             | 643.27             |
| A_68_P23985664 | chr5:111847445-111847489                          | NM_001081235:281   | Mn1        | INSIDE                 | 1.589                                                        | 4.139                          | 2050.83            | 8487.53            | 6.574                          | 1625.04            | 10683.59           |
| A_68_P27095676 | chr10:42299357-42299401                           | NM_152229:4016     | Nr2e1      | INSIDE                 | 1.589                                                        | 5.157                          | 3488.82            | 17991.60           | 8.195                          | 2726.60            | 22344.39           |
| A_68_P20005794 | chr1:4482093-4482137                              | NM_011441:4380     | Sox17      | INSIDE                 | 1.589                                                        | 1.584                          | 758.20             | 1201.34            | 2.517                          | 626.08             | 1575.97            |
| A_68_P26234573 | chr8:125135855-125135899                          | NM_021502:351      | Trappe2l   | INSIDE                 | 1.589                                                        | 2.915                          | 1854.83            | 5407.17            | 4.632                          | 1334.71            | 6182.19            |
| A_68_P31098616 | chr17:24769435-24769479                           | NM_001039363:118   | Tsc2       | INSIDE                 | 1.589                                                        | 1.349                          | 4463.30            | 6019.95            | 2.143                          | 3751.78            | 8041.93            |
| A_68_P21749221 | chr2:152240295-152240339                          | NM_175126:464      | Zecchc3    | INSIDE                 | 1.589                                                        | 3.004                          | 2569.64            | 7720.35            | 4.775                          | 2282.28            | 10898.69           |
| A_68_P24000795 | chr5:114358894-114358938                          | NM_011779:-201     | Coro1c     | PROMOTER               | 1.588                                                        | 2.186                          | 1922.06            | 4201.58            | 3.471                          | 1850.60            | 6267.42            |
| A_68_P24783941 | chr6:117857819-117857863                          | NM_001166427:-9471 | Hnrmpf     | PROMOTER               | 1.588                                                        | 6.228                          | 909.62             | 5664.78            | 9.888                          | 695.15             | 6873.69            |
| A_68_P23138267 | chr4:98062517-98062561                            | NM_001005784:22    | Inadl      | INSIDE                 | 1.588                                                        | 4.487                          | 849.63             | 3811.95            | 7.127                          | 762.97             | 5437.57            |
| A_68_P21078768 | chr2:26301082-26301126                            | NM_153125:-368     | Sec16a     | PROMOTER               | 1.588                                                        | 5.643                          | 10762.58           | 60732.44           | 8.962                          | 7729.46            | 69269.22           |
| A_68_P29218720 | chr13:91600319-91600363                           | NM_024186:-361     | Ssbp2      | PROMOTER               | 1.588                                                        | 4.755                          | 2770.98            | 13176.69           | 7.551                          | 2207.64            | 17424.88           |
| A_68_P25377988 | chr7:109415960-109416004                          | NM_009287:-355     | Stim1      | PROMOTER               | 1.588                                                        | 3.944                          | 1503.95            | 5931.63            | 6.262                          | 1256.37            | 7866.97            |
| A_68_P21910960 | chr2:181231996-181232040                          | NM_025482:61       | Tpd52l2    | INSIDE                 | 1.588                                                        | 2.405                          | 810.93             | 1950.67            | 3.820                          | 706.07             | 2696.99            |
| A_68_P26974632 | chr10:18038691-18038735                           |                    |            | Unknown                | 1.588                                                        | 2.681                          | 1100.73            | 2951.11            | 4.258                          | 938.92             | 3997.93            |
| A_68_P26102845 | chr8:101939884-101939928                          | NM_001039154:451   | Cdh8       | INSIDE                 | 1.587                                                        | 2.112                          | 3141.75            | 6636.81            | 3.352                          | 2242.95            | 7519.00            |
| A_68_P29729812 | chr14:76153932-76153976                           | NM_177381:346      | Cog3       | INSIDE                 | 1.587                                                        | 1.418                          | 1256.41            | 1781.25            | 2.249                          | 1056.18            | 2375.74            |
| A_68_P32007552 | chr19:21727793-21727837                           | NM_146096:16       | Fam108b    | INSIDE                 | 1.587                                                        | 4.598                          | 476.18             | 2189.70            | 7.296                          | 384.95             | 2808.78            |
| A_68_P31930914 | chr19:5803350-5803394                             | NR_002847:-701     | Malat1     | PROMOTER               | 1.587                                                        | 2.239                          | 2534.95            | 5676.06            | 3.553                          | 1910.89            | 6790.18            |
| A_68_P30346015 | chr15:75921006-75921050                           | NM_144847:-585     | Nrbp2      | PROMOTER               | 1.587                                                        | 2.955                          | 3133.29            | 9260.38            | 4.690                          | 2464.60            | 11559.95           |
| A_68_P20585382 | chr1:127457522-127457566                          | NM_028787:-48      | Slc35f5    | PROMOTER               | 1.587                                                        | 3.073                          | 987.60             | 3034.69            | 4.876                          | 876.38             | 4272.84            |
| A_68_P25588178 | chr7:148514084-148514128                          | NR_024509:78       | Tmem80     | INSIDE                 | 1.587                                                        | 2.664                          | 2355.48            | 6275.28            | 4.228                          | 1974.60            | 8349.00            |
| A_68_P25670894 | chr8:13870055-13870099                            | NM_181854:436      | Zfp828     | INSIDE                 | 1.587                                                        | 1.726                          | 1360.09            | 2347.50            | 2.740                          | 1066.27            | 2921.49            |
| A_68_P28745339 | chr12:112908725-112908769                         | NM_021273:1803     | Kcb        | INSIDE                 | 1.586                                                        | 3.597                          | 1932.40            | 6951.18            | 5.703                          | 1796.13            | 10243.90           |
| A_68_P21568184 | chr2:118993532-118993576                          | NM_177157:31       | Gchfr      | INSIDE                 | 1.586                                                        | 3.148                          | 2843.34            | 8949.78            | 4.993                          | 2288.86            | 11428.31           |
| A_68_P32181854 | chr19:53403918-53403962                           | NM_001008543:-995  | Mxi1       | PROMOTER               | 1.586                                                        | 2.159                          | 1039.87            | 2244.67            | 3.423                          | 842.54             | 2884.42            |
| A_68_P27551118 | chr11:3189560-3189605                             | NM_019574:-877     | Patz1      | PROMOTER               | 1.586                                                        | 2.121                          | 4010.21            | 8505.49            | 3.364                          | 3196.90            | 10755.63           |
| A_68_P26573393 | chr9:62827843-62827887                            | NM_019663:822      | Pias1      | INSIDE                 | 1.586                                                        | 1.682                          | 3374.87            | 5675.32            | 2.667                          | 2383.82            | 6356.72            |
| A_68_P20441527 | chr1:93194765-93194809                            | NM_016717:-128     | Scly       | PROMOTER               | 1.586                                                        | 4.107                          | 3339.04            | 13712.54           | 6.514                          | 2809.46            | 18299.80           |
| A_68_P30572142 | chr16:17131635-17131679                           | NM_022324:820      | Sdf2l1     | INSIDE                 | 1.586                                                        | 2.415                          | 2158.71            | 5212.22            | 3.830                          | 1737.14            | 6652.61            |
| A_68_P26822089 | chr9:110034498-110034542                          | NM_009211:-7       | Smarcc1    | PROMOTER               | 1.586                                                        | 6.946                          | 17001.44           | 118093.90          | 11.014                         | 16425.11           | 180909.50          |
| A_68_P23332899 | chr4:135804076-135804120                          | NM_011542:227      | Tec3a      | INSIDE                 | 1.586                                                        | 2.093                          | 1284.42            | 2687.88            | 3.319                          | 1047.49            | 3476.56            |
| A_68_P20156316 | chr1:37922113-37922157                            | NM_207228:-210     | Tsgal0     | DIVERGENT_PROMOTER     | 1.586                                                        | 1.464                          | 728.86             | 1066.79            | 2.321                          | 599.54             | 1391.72            |
| A_68_P28149093 | chr11:114536801-114536845                         | NM_053273:41       | Ttyh2      | INSIDE                 | 1.586                                                        | 5.212                          | 2080.39            | 10842.37           | 8.265                          | 1728.79            | 14288.31           |
| A_68_P24298747 | chr6:23789611-23789655                            | NM_153163:-332     | Cadps2     | PROMOTER               | 1.585                                                        | 1.887                          | 2105.53            | 3972.97            | 2.991                          | 1721.36            | 5148.84            |
| A_68_P23363266 | chr4:140864579-140864623                          | NM_010139:7446     | Epha2      | INSIDE                 | 1.585                                                        | 1.971                          | 645.57             | 1272.51            | 3.125                          | 472.81             | 1477.61            |
| A_68_P29619799 | chr14:56386649-56386693                           | NM_008519:1872     | Ltb4r1     | INSIDE                 | 1.585                                                        | 6.299                          | 771.24             | 4857.79            | 9.981                          | 638.62             | 6373.79            |
| A_68_P31121837 | chr17:28465985-28466029                           | NM_011287:591      | Rpl10a     | INSIDE                 | 1.585                                                        | 2.638                          | 2942.12            | 7761.29            | 4.181                          | 2365.40            | 9888.84            |
| A_68_P21100496 | chr2:29820843-29820887                            | NM_001076554:-215  | Spna2      | PROMOTER               | 1.585                                                        | 2.106                          | 2808.10            | 5914.80            | 3.338                          | 2344.22            | 7824.94            |

| ProbeName      | Target position of probe on CpG island microarray | TargetID                  | GeneSymbol    | CpG island Description | Ratio of relative methylation (TiO <sub>2</sub> -NP/Vehicle) | Sham group                     |                    |                    | TiO <sub>2</sub> -H group      |                    |                    |
|----------------|---------------------------------------------------|---------------------------|---------------|------------------------|--------------------------------------------------------------|--------------------------------|--------------------|--------------------|--------------------------------|--------------------|--------------------|
|                |                                                   |                           |               |                        |                                                              | Relative methylation (Cy5/Cy3) | Cy3 signal (Input) | Cy5 signal (MeDIP) | Relative methylation (Cy5/Cy3) | Cy3 signal (Input) | Cy5 signal (MeDIP) |
| A_68_P26165551 | chr8:113443849-113443893                          | NM_009179:106             | Sc3gal2       | INSIDE                 | 1.585                                                        | 1.358                          | 1611.73            | 2188.02            | 2.152                          | 1539.91            | 3313.18            |
| A_68_P25724844 | chr8:26127584-26127628                            | NM_027194:-76             | Tm2d2         | DIVERGENT_PROMOTER     | 1.585                                                        | 3.211                          | 1452.58            | 4664.16            | 5.088                          | 1112.65            | 5661.61            |
| A_68_P22200394 | chr3:65333128-65333172                            | NR_027955:186             | 4931440P22Rik | INSIDE                 | 1.584                                                        | 2.219                          | 2078.16            | 4610.97            | 3.514                          | 1826.35            | 6418.43            |
| A_68_P22311242 | chr3:87803722-87803766                            | NM_007529:534             | Bean          | INSIDE                 | 1.584                                                        | 1.717                          | 634.64             | 1089.84            | 2.719                          | 548.77             | 1492.29            |
| A_68_P31152235 | chr17:34259132-34259176                           | NM_010238:-462            | Brd2          | PROMOTER               | 1.584                                                        | 2.928                          | 654.82             | 1917.42            | 4.640                          | 523.46             | 2428.63            |
| A_68_P20411731 | chr1:88256083-88256127                            | NR_015507:-44             | C130036L24Rik | DIVERGENT_PROMOTER     | 1.584                                                        | 5.622                          | 3907.23            | 21965.87           | 8.906                          | 2878.08            | 25631.84           |
| A_68_P21566994 | chr2:118752369-118752413                          | NM_028117:158             | Chst14        | INSIDE                 | 1.584                                                        | 2.111                          | 4274.41            | 9021.50            | 3.342                          | 3244.99            | 10846.08           |
| A_68_P29470478 | chr14:25065176-25065220                           | NM_001163513:-56          | Dlg5          | PROMOTER               | 1.584                                                        | 2.924                          | 782.41             | 2287.43            | 4.630                          | 663.38             | 3071.49            |
| A_68_P30345428 | chr15:75834117-75834161                           | NM_001168253:5790         | Fam83h        | INSIDE                 | 1.584                                                        | 8.887                          | 2371.19            | 21072.30           | 14.073                         | 1940.59            | 27309.55           |
| A_68_P28656384 | chr12:96934105-96934150                           | NM_201518:3692            | Flrt2         | INSIDE                 | 1.584                                                        | 2.959                          | 1264.47            | 3741.34            | 4.687                          | 1024.72            | 4803.15            |
| A_68_P23403797 | chr4:149383165-149383209                          | NM_173371:-54             | H6pd          | PROMOTER               | 1.584                                                        | 6.988                          | 3001.40            | 20974.56           | 11.069                         | 2237.16            | 24763.46           |
| A_68_P31621445 | chr18:36177706-36177750                           | NM_001167891:179086       | Nrg2          | INSIDE                 | 1.584                                                        | 2.561                          | 186.27             | 476.99             | 4.056                          | 214.79             | 871.25             |
| A_68_P26398232 | chr9:30838076-30838120                            | NM_001115130:-130         | Zbtb44        | PROMOTER               | 1.584                                                        | 5.966                          | 5734.07            | 34207.50           | 9.452                          | 4537.35            | 42885.20           |
| A_68_P30371089 | chr15:80086079-80086123                           | NM_009716:487             | Atf4          | INSIDE                 | 1.583                                                        | 3.049                          | 1179.31            | 3596.02            | 4.827                          | 964.24             | 4654.11            |
| A_68_P30589274 | chr16:20733484-20733528                           | NM_009893:307             | Chrd          | INSIDE                 | 1.583                                                        | 1.426                          | 2944.10            | 4199.57            | 2.257                          | 2340.81            | 5284.08            |
| A_68_P29699037 | chr14:70479901-70479945                           | NM_018781:2671            | Egr3          | INSIDE                 | 1.583                                                        | 4.276                          | 1107.75            | 4736.44            | 6.769                          | 861.94             | 5834.35            |
| A_68_P22325451 | chr3:90280267-90280311                            | NM_026374:166             | Ilf2          | INSIDE                 | 1.583                                                        | 4.404                          | 4144.81            | 18254.36           | 6.971                          | 3183.87            | 22195.81           |
| A_68_P27787814 | chr11:50105808-50105852                           | NM_175334:8               | Mam11         | INSIDE                 | 1.583                                                        | 2.825                          | 2008.46            | 5672.99            | 4.471                          | 1575.17            | 7043.18            |
| A_68_P31556965 | chr18:23962258-23962302                           | NM_153058:-190            | Mapre2        | PROMOTER               | 1.583                                                        | 2.325                          | 1721.23            | 4002.09            | 3.681                          | 1225.12            | 4510.15            |
| A_68_P22083003 | chr3:40886734-40886778                            | NM_027558:212             | Pgrmc2        | INSIDE                 | 1.583                                                        | 4.991                          | 30520.14           | 152321.60          | 7.899                          | 21096.52           | 166634.90          |
| A_68_P22658557 | chr3:153388050-153388094                          | NM_011372:25              | St6galnac3    | INSIDE                 | 1.583                                                        | 2.667                          | 3430.94            | 9151.06            | 4.222                          | 2955.87            | 12479.41           |
| A_68_P25503171 | chr7:134093152-134093196                          | NM_001039645:-79          | Asphd1        | DIVERGENT_PROMOTER     | 1.582                                                        | 1.818                          | 2003.95            | 3643.79            | 2.877                          | 1578.37            | 4540.81            |
| A_68_P24449403 | chr6:52196333-52196377                            | NM_010450:-588            | Hoxa11        | PROMOTER               | 1.582                                                        | 2.100                          | 1809.28            | 3799.64            | 3.323                          | 1412.21            | 4692.87            |
| A_68_P28751168 | chr12:113838436-113838480                         | NM_198411:11464           | Inf2          | INSIDE                 | 1.582                                                        | 3.465                          | 1310.26            | 4540.69            | 5.484                          | 1032.55            | 5662.21            |
| A_68_P28549425 | chr12:76697618-76697662                           | NM_012024:-453            | Ppp2r5e       | PROMOTER               | 1.582                                                        | 2.537                          | 3045.09            | 7725.01            | 4.013                          | 2503.22            | 10046.44           |
| A_68_P28159701 | chr11:116359924-116359968                         | NM_026364:-8286           | Prpsap1       | PROMOTER               | 1.582                                                        | 2.957                          | 3257.37            | 9633.54            | 4.679                          | 2512.02            | 11752.83           |
| A_68_P26044774 | chr8:91565521-91565568                            | NM_021390:2517            | Sall1         | INSIDE                 | 1.582                                                        | 4.277                          | 385.41             | 1648.29            | 6.766                          | 343.98             | 2327.19            |
| A_68_P26365989 | chr9:25059719-25059763                            | NM_001205367:-299         | Septin7       | PROMOTER               | 1.582                                                        | 3.061                          | 4140.89            | 12675.54           | 4.843                          | 3365.70            | 16299.80           |
| A_68_P26587800 | chr9:65308975-65309019                            | NM_138584:253             | Spg21         | INSIDE                 | 1.582                                                        | 4.852                          | 7065.33            | 34279.80           | 7.673                          | 4943.68            | 37934.16           |
| A_68_P22650044 | chr3:152009738-152009782                          | NM_001076676:316          | Usp33         | INSIDE                 | 1.582                                                        | 2.830                          | 733.50             | 2075.90            | 4.476                          | 652.95             | 2922.67            |
| A_68_P30588338 | chr16:20591336-20591380                           | NM_182636:1704            | Vwa5b2        | INSIDE                 | 1.582                                                        | 3.605                          | 2568.88            | 9259.68            | 5.704                          | 1877.16            | 10707.37           |
| A_68_P24153997 | chr5:143668325-143668369                          | NM_007393:57              | Actb          | INSIDE                 | 1.581                                                        | 2.044                          | 1442.49            | 2948.69            | 3.232                          | 1278.47            | 4131.59            |
| A_68_P29113350 | chr13:69138021-69138065                           | NM_153534:377             | Adey2         | INSIDE                 | 1.581                                                        | 2.342                          | 1347.48            | 3155.18            | 3.703                          | 1119.72            | 4146.15            |
| A_68_P21754297 | chr2:153171289-153171333                          | NM_001039939:-564         | Asx1          | PROMOTER               | 1.581                                                        | 2.682                          | 4922.89            | 13203.66           | 4.241                          | 3681.23            | 15611.84           |
| A_68_P23418114 | chr4:151712427-151712471                          | NM_001081376:-311         | Chd5          | PROMOTER               | 1.581                                                        | 2.138                          | 1253.46            | 2679.94            | 3.379                          | 968.47             | 3272.88            |
| A_68_P25504835 | chr7:134404064-134404108                          | NM_023203:95              | Detpp1        | INSIDE                 | 1.581                                                        | 2.655                          | 4740.09            | 12584.03           | 4.197                          | 3408.48            | 14305.16           |
| A_68_P31939393 | chr19:7416055-7416099                             | NM_001080388:258          | Mark2         | INSIDE                 | 1.581                                                        | 2.657                          | 5515.08            | 14651.84           | 4.199                          | 4403.33            | 18491.38           |
| A_68_P30568394 | chr16:16213390-16213434                           | NM_026163:-25             | Pkp2          | PROMOTER               | 1.581                                                        | 1.469                          | 1701.74            | 2499.70            | 2.322                          | 1438.16            | 3338.92            |
| A_68_P32036088 | chr19:26681356-26681400                           | NM_011416:1729            | Smarca2       | INSIDE                 | 1.581                                                        | 3.893                          | 616.82             | 2401.14            | 6.156                          | 548.04             | 3373.76            |
| A_68_P24595943 | chr6:83817210-83817254                            | ENSMUST00000113842:8189   |               | DOWNSTREAM             | 1.581                                                        | 1.572                          | 847.83             | 1332.65            | 2.486                          | 720.15             | 1790.19            |
| A_68_P30382137 | chr15:82043157-82043202                           | NM_001207021:66           | Al848285      | INSIDE                 | 1.580                                                        | 3.256                          | 825.33             | 2687.65            | 5.144                          | 638.50             | 3284.60            |
| A_68_P21875562 | chr2:174289603-174289647                          | NM_025983:-22             | Atp5e         | PROMOTER               | 1.580                                                        | 3.191                          | 1417.02            | 4521.49            | 5.041                          | 1276.23            | 6434.07            |
| A_68_P27649080 | chr11:23979542-23979586                           | NM_001159290:-1130        | Bcl11a        | PROMOTER               | 1.580                                                        | 1.559                          | 1357.49            | 2115.82            | 2.463                          | 1197.90            | 2950.60            |
| A_68_P26816894 | chr9:108734858-108734902                          | NM_080437:6230            | Celsr3        | INSIDE                 | 1.580                                                        | 3.081                          | 4378.64            | 13489.38           | 4.868                          | 3369.52            | 16404.32           |
| A_68_P23345719 | chr4:137990637-137990681                          | NM_026689:72              | Mul1          | INSIDE                 | 1.580                                                        | 2.436                          | 2819.27            | 6866.86            | 3.849                          | 2247.89            | 8653.07            |
| A_68_P32462210 | chrX:70599683-70599727                            | NM_001160229:11745        | Zfp275        | INSIDE                 | 1.580                                                        | 3.811                          | 1027.01            | 3913.44            | 6.020                          | 642.16             | 3866.00            |
| A_68_P30356303 | chr15:77688418-77688462                           |                           |               | Unknown                | 1.580                                                        | 1.913                          | 1944.48            | 3720.65            | 3.023                          | 1658.89            | 5014.82            |
| A_68_P28458172 | chr12:57782364-57782408                           | ENSMUST00000159874:8518   |               | PROMOTER               | 1.580                                                        | 3.846                          | 1132.52            | 4355.31            | 6.075                          | 886.88             | 5387.73            |
| A_68_P26342888 | chr9:20348946-20348990                            | ENSMUST00000171046:111765 |               | INSIDE                 | 1.580                                                        | 1.813                          | 1457.75            | 2642.66            | 2.864                          | 1294.14            | 3706.00            |
| A_68_P30476596 | chr15:98637471-98637515                           | NM_001013741:864          | Ddn           | INSIDE                 | 1.579                                                        | 3.302                          | 1653.03            | 5459.03            | 5.215                          | 1322.62            | 6897.74            |
| A_68_P24804128 | chr6:121362766-121362810                          | NM_001033354:60908        | Iqsec3        | INSIDE                 | 1.579                                                        | 3.200                          | 3220.17            | 10305.15           | 5.052                          | 2257.41            | 11404.89           |

| ProbeName      | Target position of probe on CpG island microarray | TargetID           | GeneSymbol    | CpG island Description | Ratio of relative methylation (TiO <sub>2</sub> -NP/Vehicle) | Sham group                                             |                               |                               | TiO <sub>2</sub> -H group                              |                               |                               |
|----------------|---------------------------------------------------|--------------------|---------------|------------------------|--------------------------------------------------------------|--------------------------------------------------------|-------------------------------|-------------------------------|--------------------------------------------------------|-------------------------------|-------------------------------|
|                |                                                   |                    |               |                        |                                                              | Relative methylation (C <sub>5</sub> /C <sub>3</sub> ) | C <sub>3</sub> signal (Input) | C <sub>5</sub> signal (MeDIP) | Relative methylation (C <sub>5</sub> /C <sub>3</sub> ) | C <sub>3</sub> signal (Input) | C <sub>5</sub> signal (MeDIP) |
| A_68_P24618420 | chr6:87788600-87788644                            | NM_133934:131      | Isoy1         | INSIDE                 | 1.579                                                        | 2.686                                                  | 1150.74                       | 3090.41                       | 4.240                                                  | 1002.82                       | 4252.19                       |
| A_68_P28163660 | chr11:117060956-117061000                         | NM_001113486:4     | Septin9       | INSIDE                 | 1.579                                                        | 3.981                                                  | 1641.20                       | 6532.99                       | 6.285                                                  | 1352.89                       | 8503.57                       |
| A_68_P24954289 | chr7:6106868-6106913                              | NM_001013012:683   | Zfp787        | INSIDE                 | 1.579                                                        | 3.682                                                  | 2148.52                       | 7910.72                       | 5.812                                                  | 1736.73                       | 10094.57                      |
| A_68_P31145425 | chr17:32533548-32533592                           | NR_029458-6388     | A530088E08Rik | PROMOTER               | 1.578                                                        | 5.700                                                  | 2471.14                       | 14086.48                      | 8.994                                                  | 2301.26                       | 20697.64                      |
| A_68_P26864197 | chr9:117949927-117949971                          | NM_001048146:332   | Azi2          | INSIDE                 | 1.578                                                        | 4.258                                                  | 401.44                        | 1709.32                       | 6.717                                                  | 385.58                        | 2590.10                       |
| A_68_P20472150 | chr1:99557453-99557497                            | NM_133825:1121     | D1Ertd622c    | INSIDE                 | 1.578                                                        | 3.205                                                  | 1890.17                       | 6057.91                       | 5.058                                                  | 1626.71                       | 8228.26                       |
| A_68_P30423478 | chr15:88979773-88979817                           | NM_011161:242      | Mapk11        | INSIDE                 | 1.578                                                        | 2.423                                                  | 2470.96                       | 5987.54                       | 3.823                                                  | 2005.79                       | 7668.84                       |
| A_68_P20352935 | chr1:75248212-75248256                            | NM_008985:12549    | Ptpn          | INSIDE                 | 1.578                                                        | 2.927                                                  | 2292.55                       | 6709.62                       | 4.618                                                  | 1724.70                       | 7964.70                       |
| A_68_P24018800 | chr5:117566119-117566163                          | NM_001122666-138   | Suds3         | DIVERGENT_PROMOTER     | 1.578                                                        | 3.103                                                  | 670.81                        | 2081.47                       | 4.896                                                  | 648.91                        | 3176.91                       |
| A_68_P28553589 | chr12:77470150-77470194                           | NM_001172104:279   | Zbtb25        | INSIDE                 | 1.578                                                        | 2.047                                                  | 870.21                        | 1781.03                       | 3.230                                                  | 770.10                        | 2487.54                       |
| A_68_P30243549 | chr15:57526400-57526444                           | NM_199449:201      | Zhx2          | INSIDE                 | 1.578                                                        | 5.586                                                  | 1314.57                       | 7343.29                       | 8.817                                                  | 1022.93                       | 9019.07                       |
| A_68_P27308088 | chr10:84849580-84849624                           | NM_028709:44       | Btdb11        | INSIDE                 | 1.577                                                        | 2.863                                                  | 487.57                        | 1395.76                       | 4.515                                                  | 441.56                        | 1993.86                       |
| A_68_P30895871 | chr16:78377255-78377299                           | NM_009770:246      | Btg3          | PROMOTER               | 1.577                                                        | 3.362                                                  | 738.15                        | 2481.85                       | 5.303                                                  | 628.77                        | 3334.18                       |
| A_68_P31373927 | chr17:79234917-79234961                           | NM_181649:83       | Cecdc75       | INSIDE                 | 1.577                                                        | 2.673                                                  | 2020.61                       | 5401.30                       | 4.216                                                  | 1599.74                       | 6744.32                       |
| A_68_P30542887 | chr16:10545493-10545537                           | NM_001204229:83    | Clec16a       | INSIDE                 | 1.577                                                        | 3.144                                                  | 1929.46                       | 6067.15                       | 4.960                                                  | 1642.69                       | 8147.72                       |
| A_68_P24850798 | chr6:131338248-131338292                          | NM_011733:198      | Csda          | INSIDE                 | 1.577                                                        | 5.758                                                  | 1846.89                       | 10634.69                      | 9.081                                                  | 1644.68                       | 14935.00                      |
| A_68_P24501242 | chr6:63207663-63207707                            | NM_008167:834      | Grid2         | INSIDE                 | 1.577                                                        | 4.696                                                  | 1727.57                       | 8111.93                       | 7.405                                                  | 1561.71                       | 11564.15                      |
| A_68_P31126967 | chr17:29400949-29400993                           | NM_026845:-54      | Ppil1         | DIVERGENT_PROMOTER     | 1.577                                                        | 1.945                                                  | 970.15                        | 1886.55                       | 3.066                                                  | 846.71                        | 2596.06                       |
| A_68_P28237421 | chr12:11273151-11273195                           | NM_025695:481      | Smc6          | INSIDE                 | 1.577                                                        | 2.663                                                  | 948.41                        | 2526.00                       | 4.199                                                  | 774.69                        | 3253.12                       |
| A_68_P28074030 | chr11:101327012-101327056                         | NM_012037:479      | Vat1          | INSIDE                 | 1.577                                                        | 3.290                                                  | 3016.42                       | 9925.08                       | 5.188                                                  | 2617.11                       | 13577.53                      |
| A_68_P30578497 | chr16:18235357-18235401                           | NM_172151:-149     | Zdhhc8        | PROMOTER               | 1.577                                                        | 2.553                                                  | 2395.00                       | 6115.41                       | 4.026                                                  | 1963.17                       | 7903.27                       |
| A_68_P28751328 | chr12:113858149-113858193                         | NM_007421:-87      | Adssl1        | PROMOTER               | 1.576                                                        | 1.860                                                  | 1284.81                       | 2389.37                       | 2.931                                                  | 1070.45                       | 3137.30                       |
| A_68_P30588065 | chr16:20535666-20535710                           | NM_009679:112      | Ap2m1         | INSIDE                 | 1.576                                                        | 4.216                                                  | 3006.62                       | 12676.79                      | 6.643                                                  | 2140.72                       | 14221.37                      |
| A_68_P27998411 | chr11:88007034-88007078                           | NM_001172099:23990 | Cuedc1        | INSIDE                 | 1.576                                                        | 1.634                                                  | 744.42                        | 1216.08                       | 2.574                                                  | 608.68                        | 1566.62                       |
| A_68_P22803179 | chr4:28740971-28741015                            | NM_001122889:698   | Epha7         | INSIDE                 | 1.576                                                        | 2.231                                                  | 745.90                        | 1664.05                       | 3.515                                                  | 564.62                        | 1984.76                       |
| A_68_P21680284 | chr2:139503094-139503138                          | NM_001126490:797   | Ism1          | PROMOTER               | 1.576                                                        | 2.196                                                  | 1282.18                       | 2816.30                       | 3.462                                                  | 995.39                        | 3446.44                       |
| A_68_P23439858 | chr4:155028864-155028908                          | NM_145124:14450    | Mib2          | INSIDE                 | 1.576                                                        | 1.782                                                  | 3808.57                       | 6788.31                       | 2.808                                                  | 2786.77                       | 7826.64                       |
| A_68_P20412608 | chr1:88424274-88424318                            | NM_008972:986      | Ptma          | INSIDE                 | 1.576                                                        | 1.716                                                  | 777.56                        | 1334.62                       | 2.705                                                  | 670.32                        | 1813.35                       |
| A_68_P29639602 | chr14:60244436-60244480                           | NM_145463:341      | Shisa2        | INSIDE                 | 1.576                                                        | 3.893                                                  | 992.08                        | 3861.92                       | 6.133                                                  | 779.98                        | 4783.79                       |
| A_68_P21420490 | chr2:90910289-90910333                            | NM_026721:68       | Slc39a13      | INSIDE                 | 1.576                                                        | 1.606                                                  | 2381.15                       | 3824.63                       | 2.532                                                  | 1770.20                       | 4482.07                       |
| A_68_P31121999 | chr17:28487626-28487670                           | NM_001098226-103   | Tead3         | PROMOTER               | 1.576                                                        | 1.906                                                  | 4153.46                       | 7917.25                       | 3.004                                                  | 3102.91                       | 9321.84                       |
| A_68_P30560722 | chr16:14159381-14159425                           | NM_001081154:-35   | 4921513D23Rik | DIVERGENT_PROMOTER     | 1.575                                                        | 3.794                                                  | 13836.62                      | 52494.04                      | 5.973                                                  | 8244.00                       | 49245.55                      |
| A_68_P27630023 | chr11:20013151-20013195                           | NM_146243:-218     | Actr2         | PROMOTER               | 1.575                                                        | 4.701                                                  | 5876.49                       | 27627.98                      | 7.405                                                  | 4547.82                       | 33674.90                      |
| A_68_P21094161 | chr2:28773677-28773726                            | NM_001164186-1741  | Barhl1        | PROMOTER               | 1.575                                                        | 1.669                                                  | 957.36                        | 1597.63                       | 2.628                                                  | 775.30                        | 2037.63                       |
| A_68_P28962023 | chr13:38751002-38751046                           | NM_025380:-127     | Eef1e1        | PROMOTER               | 1.575                                                        | 2.491                                                  | 3706.13                       | 9230.73                       | 3.922                                                  | 2999.68                       | 11764.15                      |
| A_68_P30080950 | chr15:25344237-25344281                           | NR_027376:312      | Gm5468        | INSIDE                 | 1.575                                                        | 2.606                                                  | 378.57                        | 986.49                        | 4.105                                                  | 368.66                        | 1513.46                       |
| A_68_P20905056 | chr1:187941218-187941262                          | NM_146106:-51      | Lyplal1       | PROMOTER               | 1.575                                                        | 3.364                                                  | 1318.19                       | 4435.03                       | 5.298                                                  | 1030.23                       | 5457.80                       |
| A_68_P29664074 | chr14:64479020-64479064                           | NM_028228:-106     | Pinx1         | PROMOTER               | 1.575                                                        | 3.862                                                  | 3348.45                       | 12932.88                      | 6.085                                                  | 2482.57                       | 15106.29                      |
| A_68_P30426169 | chr15:89422304-89422348                           | NM_026817:28       | Rabl2         | INSIDE                 | 1.575                                                        | 3.008                                                  | 939.82                        | 2826.53                       | 4.737                                                  | 772.82                        | 3660.98                       |
| A_68_P22963537 | chr4:61947638-61947682                            | NM_025286:182      | Slc31a2       | INSIDE                 | 1.575                                                        | 2.257                                                  | 4243.51                       | 9576.03                       | 3.553                                                  | 3512.67                       | 12481.00                      |
| A_68_P28160203 | chr11:116442887-116442931                         | NM_173755:-147     | Ube2o         | PROMOTER               | 1.575                                                        | 2.804                                                  | 3375.46                       | 9466.43                       | 4.418                                                  | 2808.59                       | 12408.08                      |
| A_68_P26822984 | chr9:110207818-110207862                          | NM_001081381:145   | 2610002117Rik | INSIDE                 | 1.574                                                        | 2.186                                                  | 1153.88                       | 2522.94                       | 3.441                                                  | 942.26                        | 3242.42                       |
| A_68_P28002763 | chr11:88726023-88726067                           | NM_001042541:-145  | Akap1         | PROMOTER               | 1.574                                                        | 3.521                                                  | 843.99                        | 2971.51                       | 5.541                                                  | 761.65                        | 4220.24                       |
| A_68_P29009048 | chr13:46764994-46765038                           | NM_001033192:126   | C78339        | INSIDE                 | 1.574                                                        | 2.856                                                  | 1542.16                       | 4404.73                       | 4.497                                                  | 1400.30                       | 6296.65                       |
| A_68_P33005168 | chr7:3366552-3366596                              | NM_133189:29890    | Caeng7        | DOWNSTREAM             | 1.574                                                        | 3.885                                                  | 3043.52                       | 11824.58                      | 6.115                                                  | 2177.56                       | 13315.37                      |
| A_68_P22019079 | chr3:28680302-28680346                            | NM_177586:92       | Eif5a2        | INSIDE                 | 1.574                                                        | 5.981                                                  | 1545.59                       | 9243.98                       | 9.412                                                  | 1505.64                       | 14171.48                      |
| A_68_P23362414 | chr4:140703695-140703739                          | NM_172518:-120     | Fbxo42        | DIVERGENT_PROMOTER     | 1.574                                                        | 1.696                                                  | 1041.78                       | 1767.35                       | 2.670                                                  | 914.58                        | 2441.71                       |
| A_68_P25362933 | chr7:106774200-106774244                          | NM_001195529:1391  | Gm4980        | INSIDE                 | 1.574                                                        | 1.983                                                  | 2380.55                       | 4720.30                       | 3.121                                                  | 1714.36                       | 5350.31                       |
| A_68_P28515346 | chr12:70683995-70684039                           | NM_001033236-1     | Mettl21d      | PROMOTER               | 1.574                                                        | 3.709                                                  | 1807.51                       | 6704.49                       | 5.840                                                  | 1491.54                       | 8710.42                       |
| A_68_P30556205 | chr16:13257041-13257085                           | NM_181860:-8109    | Mkl2          | PROMOTER               | 1.574                                                        | 4.312                                                  | 4838.93                       | 20866.87                      | 6.790                                                  | 3944.61                       | 26782.12                      |
| A_68_P30292508 | chr15:66409642-66409686                           | NM_001081409:531   | Phi2011       | INSIDE                 | 1.574                                                        | 2.490                                                  | 1736.18                       | 4323.53                       | 3.921                                                  | 1286.61                       | 5044.53                       |

| ProbeName      | Target position of probe on CpG island microarray | TargetID                | GeneSymbol    | CpG island Description | Ratio of relative methylation (TiO <sub>2</sub> -NP/Vehicle) | Sham group                     |                    |                    | TiO <sub>2</sub> -H group      |                    |                    |
|----------------|---------------------------------------------------|-------------------------|---------------|------------------------|--------------------------------------------------------------|--------------------------------|--------------------|--------------------|--------------------------------|--------------------|--------------------|
|                |                                                   |                         |               |                        |                                                              | Relative methylation (Cy5/Cy3) | Cy3 signal (Input) | Cy5 signal (MeDIP) | Relative methylation (Cy5/Cy3) | Cy3 signal (Input) | Cy5 signal (MeDIP) |
| A_68_P27534649 | chr10:126648747-126648791                         | NM_054097:-90           | Pip4k2c       | PROMOTER               | 1.574                                                        | 2.122                          | 1956.33            | 4150.66            | 3.340                          | 1693.26            | 5656.06            |
| A_68_P28938191 | chr13:34436110-34436154                           | NM_001033167:919        | Sle22a23      | INSIDE                 | 1.574                                                        | 3.253                          | 3942.01            | 12824.17           | 5.122                          | 2927.73            | 14995.06           |
| A_68_P26887498 | chr9:122026355-122026379                          | NM_001164572:-27        | Snrk          | PROMOTER               | 1.574                                                        | 3.457                          | 2955.78            | 10218.80           | 5.442                          | 2375.99            | 12929.20           |
| A_68_P28157433 | chr11:115971055-115971099                         | NM_001205081:473        | Trim47        | INSIDE                 | 1.574                                                        | 7.514                          | 4631.18            | 34796.67           | 11.828                         | 3674.12            | 43458.28           |
| A_68_P31625687 | chr18:36919881-36919925                           | NM_026464:10            | Wdr55         | INSIDE                 | 1.574                                                        | 3.041                          | 1928.33            | 5863.74            | 4.786                          | 1532.31            | 7333.66            |
| A_68_P27563479 | chr11:5344842-5344886                             | NM_001080924:-14        | Znrf3         | PROMOTER               | 1.574                                                        | 1.826                          | 2713.11            | 4953.86            | 2.874                          | 2271.20            | 6527.31            |
| A_68_P23797912 | chr5:73883055-73883099                            | NM_001190733:812        | Deun1d4       | INSIDE                 | 1.573                                                        | 9.002                          | 22377.90           | 201451.70          | 14.162                         | 12948.66           | 183376.70          |
| A_68_P20237360 | chr1:54614625-54614669                            | NM_001163314:-120       | Pgap1         | PROMOTER               | 1.573                                                        | 1.663                          | 1951.68            | 3246.19            | 2.616                          | 1243.26            | 3252.49            |
| A_68_P28774236 | chr12:118772882-118772926                         | NM_175930:17953         | Rapgef5       | INSIDE                 | 1.573                                                        | 1.763                          | 672.93             | 1186.15            | 2.773                          | 608.43             | 1687.13            |
| A_68_P24040030 | chr5:121099321-121099365                          | NM_013832:512           | Rasal1        | INSIDE                 | 1.573                                                        | 2.490                          | 6047.64            | 15060.88           | 3.917                          | 4697.18            | 18400.08           |
| A_68_P23296214 | chr4:129012152-129012196                          | NM_009030:440           | Rbbp4         | INSIDE                 | 1.573                                                        | 0.381                          | 1028.53            | 392.14             | 0.600                          | 1088.76            | 652.93             |
| A_68_P30379760 | chr15:81641863-81641907                           | NM_017376:41            | Tef           | INSIDE                 | 1.573                                                        | 2.878                          | 884.23             | 2544.59            | 4.526                          | 802.40             | 3631.53            |
| A_68_P32488661 | chrX:78315918-78315962                            | NM_138751:-42           | Tmem47        | PROMOTER               | 1.573                                                        | 2.978                          | 1549.11            | 4612.70            | 4.684                          | 1104.22            | 5171.91            |
| A_68_P23246908 | chr4:119406642-119406686                          | ENSMUST00000123698:219  |               | INSIDE                 | 1.573                                                        | 2.387                          | 438.30             | 1046.35            | 3.756                          | 363.98             | 1367.23            |
| A_68_P22129174 | chr3:51144832-51144876                            | ENSMUST00000135496:-274 |               | PROMOTER               | 1.573                                                        | 2.065                          | 4796.61            | 9906.33            | 3.248                          | 3599.83            | 11691.13           |
| A_68_P27764455 | chr11:45665845-45665889                           | NM_001045520:401        | Clint1        | INSIDE                 | 1.572                                                        | 1.508                          | 1316.31            | 1985.46            | 2.371                          | 1074.77            | 2547.83            |
| A_68_P20462986 | chr1:97210270-97210314                            | NM_026321:88            | Fam174a       | INSIDE                 | 1.572                                                        | 2.255                          | 485.23             | 1094.27            | 3.546                          | 465.92             | 1651.96            |
| A_68_P25348908 | chr7:104230293-104230337                          | NM_001162477:54         | Gab2          | INSIDE                 | 1.572                                                        | 2.820                          | 412.83             | 1164.28            | 4.434                          | 361.09             | 1600.99            |
| A_68_P26656177 | chr9:77602711-77602755                            | NM_010295:391           | Gelc          | INSIDE                 | 1.572                                                        | 0.426                          | 1277.34            | 544.15             | 0.670                          | 1078.63            | 722.15             |
| A_68_P24476912 | chr6:56747694-56747738                            | NM_145958:91            | Kbtbd2        | INSIDE                 | 1.572                                                        | 1.972                          | 1031.50            | 2033.69            | 3.100                          | 895.96             | 2777.48            |
| A_68_P24818877 | chr6:125081806-125081850                          | NM_138747:-72           | Nop2          | PROMOTER               | 1.572                                                        | 2.177                          | 640.40             | 1394.03            | 3.421                          | 552.07             | 1888.75            |
| A_68_P30650841 | chr16:32078788-32078844                           | NM_177326:543           | Pak2          | INSIDE                 | 1.572                                                        | 5.599                          | 463.67             | 2596.20            | 8.801                          | 294.26             | 2589.67            |
| A_68_P26133404 | chr8:107898928-107898972                          | NM_001081333:-330       | Plekhd4       | PROMOTER               | 1.572                                                        | 3.196                          | 1633.40            | 5220.99            | 5.026                          | 1335.87            | 6714.39            |
| A_68_P25114625 | chr7:57033846-57033890                            | NM_133740:141           | Prrt3         | INSIDE                 | 1.572                                                        | 1.486                          | 840.46             | 1249.05            | 2.336                          | 683.42             | 1596.68            |
| A_68_P23703749 | chr5:54390129-54390173                            | NM_001081103:389        | Stim2         | INSIDE                 | 1.572                                                        | 4.884                          | 1311.45            | 6404.52            | 7.676                          | 1102.18            | 8460.46            |
| A_68_P32537532 | chrX:91368506-91368550                            | NM_001044386:218        | Zfx           | INSIDE                 | 1.572                                                        | 4.782                          | 3575.38            | 17099.25           | 7.520                          | 2303.95            | 17325.96           |
| A_68_P24066928 | chr5:125921960-125922004                          | NM_029752:45            | Bri3bp        | INSIDE                 | 1.571                                                        | 1.735                          | 1634.18            | 2835.85            | 2.727                          | 1390.05            | 3790.44            |
| A_68_P30822064 | chr16:64851589-64851633                           | NM_178647:-300          | Cggbp1        | PROMOTER               | 1.571                                                        | 1.499                          | 3489.85            | 5231.78            | 2.355                          | 2884.05            | 6790.67            |
| A_68_P21904961 | chr2:180332965-180333009                          | NM_009936:60            | Col9a3        | INSIDE                 | 1.571                                                        | 2.012                          | 1222.98            | 2461.18            | 3.162                          | 972.24             | 3074.01            |
| A_68_P27282058 | chr10:79727411-79727455                           | NM_001122604:-303       | Dazap1        | DIVERGENT_PROMOTER     | 1.571                                                        | 1.727                          | 1340.24            | 2314.13            | 2.713                          | 1046.16            | 2838.21            |
| A_68_P31135104 | chr17:30749389-30749433                           | NM_001113560:194        | Glo1          | INSIDE                 | 1.571                                                        | 4.088                          | 647.44             | 2646.58            | 6.422                          | 564.46             | 3624.90            |
| A_68_P27425024 | chr10:106709059-106709103                         | NM_001033223:194        | Lin7a         | INSIDE                 | 1.571                                                        | 2.971                          | 3596.44            | 10684.37           | 4.666                          | 2802.49            | 13076.50           |
| A_68_P21130446 | chr2:34769487-34769531                            | NM_028716:-12           | Phf19         | PROMOTER               | 1.571                                                        | 5.149                          | 4230.44            | 21782.11           | 8.088                          | 3388.78            | 27408.76           |
| A_68_P25670554 | chr8:13785750-13785794                            | NM_025924:158           | Upf3a         | INSIDE                 | 1.571                                                        | 3.934                          | 1989.76            | 7828.20            | 6.182                          | 1622.32            | 10028.85           |
| A_68_P28613409 | chr12:88331117-88331161                           | NM_001080943:-1512      | Zdhhc22       | PROMOTER               | 1.571                                                        | 3.192                          | 1058.11            | 3377.73            | 5.015                          | 913.34             | 4579.94            |
| A_68_P23467741 | chr5:8368019-8368063                              | NM_001098225:41         | Adam22        | INSIDE                 | 1.570                                                        | 1.732                          | 1004.19            | 1738.76            | 2.719                          | 921.50             | 2505.13            |
| A_68_P30990999 | chr16:96304407-96304451                           | NM_145125:-393          | Brwd1         | PROMOTER               | 1.570                                                        | 2.758                          | 5273.40            | 14544.89           | 4.331                          | 3882.58            | 16817.11           |
| A_68_P28067423 | chr11:100181873-100181917                         | NM_011508:585           | Eif1          | INSIDE                 | 1.570                                                        | 2.429                          | 743.63             | 1806.49            | 3.813                          | 565.99             | 2158.28            |
| A_68_P27055250 | chr10:33847341-33847385                           | NM_175449:416           | Fam26f        | INSIDE                 | 1.570                                                        | 3.541                          | 2209.17            | 7822.10            | 5.557                          | 1786.17            | 9926.43            |
| A_68_P22892659 | chr4:47105046-47105090                            | NM_172693:244           | Galnt12       | INSIDE                 | 1.570                                                        | 4.111                          | 837.62             | 3443.52            | 6.453                          | 723.30             | 4667.16            |
| A_68_P27253670 | chr10:74430232-74430276                           | NM_010311:279           | Gnaz          | INSIDE                 | 1.570                                                        | 1.802                          | 1266.85            | 2282.44            | 2.829                          | 1006.12            | 2846.54            |
| A_68_P26885522 | chr9:121686826-121686870                          | NM_028202:124           | Kbtbd5        | INSIDE                 | 1.570                                                        | 2.948                          | 478.89             | 1411.61            | 4.628                          | 485.79             | 2248.24            |
| A_68_P24119778 | chr5:136646540-136646584                          | NM_178751:-36           | Orai2         | PROMOTER               | 1.570                                                        | 2.888                          | 626.29             | 1808.83            | 4.534                          | 612.18             | 2775.79            |
| A_68_P26282992 | chr9:6168448-6168492                              | NM_027924:-141          | Pdgd1         | PROMOTER               | 1.570                                                        | 2.157                          | 1141.79            | 2463.16            | 3.387                          | 924.44             | 3131.10            |
| A_68_P30346615 | chr15:76011854-76011898                           | NM_201394:14264         | Plec          | INSIDE                 | 1.570                                                        | 4.794                          | 1004.83            | 4816.70            | 7.527                          | 812.41             | 6114.67            |
| A_68_P28431157 | chr12:52792863-52792907                           | NM_001172098:17         | Strn3         | INSIDE                 | 1.570                                                        | 1.974                          | 635.80             | 1255.32            | 3.100                          | 541.32             | 1678.28            |
| A_68_P26894035 | chr9:123169998-123170042                          | NM_001002267:-113       | Tmem158       | PROMOTER               | 1.570                                                        | 5.235                          | 1322.39            | 6923.00            | 8.219                          | 1293.02            | 10627.22           |
| A_68_P26295538 | chr9:9239294-9239338                              | NM_027823:-303          | Arhgap42      | PROMOTER               | 1.569                                                        | 3.162                          | 3797.50            | 12008.35           | 4.961                          | 2969.28            | 14729.70           |
| A_68_P32111326 | chr19:40905687-40905731                           | NM_172839:-60           | Ccnj          | PROMOTER               | 1.569                                                        | 2.042                          | 377.81             | 771.60             | 3.205                          | 357.59             | 1146.05            |
| A_68_P26940376 | chr10:11063434-11063478                           | NM_010146:214           | Epm2a         | INSIDE                 | 1.569                                                        | 2.438                          | 362.07             | 882.58             | 3.824                          | 380.29             | 1454.08            |
| A_68_P27289087 | chr10:80820153-80820197                           | NM_028657:-140          | F630110N24Rik | DIVERGENT_PROMOTER     | 1.569                                                        | 2.472                          | 1187.14            | 2934.50            | 3.880                          | 956.23             | 3709.79            |

| ProbeName      | Target position of probe on CpG island microarray | TargetID                 | GeneSymbol    | CpG island Description | Ratio of relative methylation (TiO <sub>2</sub> -NP/Vehicle) | Sham group                     |                    |                    | TiO <sub>2</sub> -H group      |                    |                    |
|----------------|---------------------------------------------------|--------------------------|---------------|------------------------|--------------------------------------------------------------|--------------------------------|--------------------|--------------------|--------------------------------|--------------------|--------------------|
|                |                                                   |                          |               |                        |                                                              | Relative methylation (Cy5/Cy3) | Cy3 signal (Input) | Cy5 signal (MeDIP) | Relative methylation (Cy5/Cy3) | Cy3 signal (Input) | Cy5 signal (MeDIP) |
| A_68_P29448409 | chr14:21514700-21514744                           | NM_028428:533            | Fur11         | INSIDE                 | 1.569                                                        | 1.750                          | 974.29             | 1705.36            | 2.746                          | 895.85             | 2460.26            |
| A_68_P20997431 | chr2:9796515-9796559                              | NM_008091:3691           | Gata3         | INSIDE                 | 1.569                                                        | 3.329                          | 5427.34            | 18065.56           | 5.224                          | 3876.76            | 20251.14           |
| A_68_P26003887 | chr8:83866396-83866440                            | ENSMUST00000172167:-36   |               | PROMOTER               | 1.569                                                        | 2.225                          | 3413.89            | 7597.57            | 3.491                          | 2846.17            | 9936.75            |
| A_68_P20140952 | chr1:34899643-34899687                            | NM_001160235:231         | Fam168b       | INSIDE                 | 1.568                                                        | 3.941                          | 1156.93            | 4558.99            | 6.180                          | 1041.76            | 6438.55            |
| A_68_P25459669 | chr7:125849289-125849333                          | NM_019580:-58            | Gde1          | DIVERGENT_PROMOTER     | 1.568                                                        | 2.848                          | 2463.48            | 7016.05            | 4.464                          | 2041.48            | 9114.14            |
| A_68_P20417070 | chr1:89224090-89224134                            | NM_001110212:509         | Gigyf2        | INSIDE                 | 1.568                                                        | 2.784                          | 842.92             | 2346.29            | 4.365                          | 744.25             | 3248.54            |
| A_68_P22404196 | chr3:106904415-106904459                          | NM_008417:-48            | Kena2         | PROMOTER               | 1.568                                                        | 2.767                          | 2265.93            | 6269.43            | 4.338                          | 1842.84            | 7994.73            |
| A_68_P25011324 | chr7:26471878-26471922                            | NM_011577:-120           | Tgfb1         | PROMOTER               | 1.568                                                        | 2.535                          | 2686.22            | 6810.85            | 3.977                          | 2203.33            | 8762.21            |
| A_68_P27287712 | chr10:80611089-80611133                           | NM_010731:12095          | Zbtb7a        | INSIDE                 | 1.568                                                        | 3.451                          | 1624.44            | 5606.41            | 5.410                          | 1331.74            | 7204.85            |
| A_68_P25230180 | chr7:80762845-80762889                            | AK158912:403             |               | INSIDE                 | 1.568                                                        | 1.546                          | 841.61             | 1301.17            | 2.425                          | 793.56             | 1924.14            |
| A_68_P23396096 | chr4:148098703-148098747                          | ENSMUST00000139895:10913 |               | DOWNSTREAM             | 1.568                                                        | 2.054                          | 3592.36            | 7376.99            | 3.220                          | 3195.88            | 10289.84           |
| A_68_P22820149 | chr4:32327040-32327088                            | ENSMUST00000165661:-3643 |               | PROMOTER               | 1.568                                                        | 2.459                          | 817.83             | 2011.16            | 3.856                          | 654.28             | 2522.89            |
| A_68_P24980793 | chr7:16899189-16899233                            | NM_133234:4279           | Bbc3          | INSIDE                 | 1.567                                                        | 1.681                          | 1963.70            | 3300.92            | 2.634                          | 1626.81            | 4285.17            |
| A_68_P23977812 | chr5:110535984-110536028                          | NM_145147:1210           | Gtpbp6        | INSIDE                 | 1.567                                                        | 2.103                          | 995.06             | 2092.77            | 3.295                          | 788.22             | 2597.31            |
| A_68_P26954150 | chr10:13685112-13685158                           | NM_010437:-1050          | Hivep2        | PROMOTER               | 1.567                                                        | 2.407                          | 1916.49            | 4612.93            | 3.773                          | 1407.57            | 5310.50            |
| A_68_P20042287 | chr1:13650338-13650382                            | NM_145381:230            | Lactb2        | INSIDE                 | 1.567                                                        | 5.127                          | 2361.50            | 12108.17           | 8.035                          | 1864.14            | 14978.65           |
| A_68_P20897789 | chr1:186669350-186669394                          | NM_133684:354            | Mosc2         | INSIDE                 | 1.567                                                        | 4.109                          | 4824.79            | 19825.41           | 6.437                          | 4411.19            | 28396.76           |
| A_68_P24950760 | chr7:4788206-4788250                              | NM_172737:8070           | Shisa7        | INSIDE                 | 1.567                                                        | 4.057                          | 712.16             | 2889.21            | 6.357                          | 591.98             | 3763.03            |
| A_68_P20191548 | chr1:43991025-43991069                            | NM_009418:195            | Tpp2          | INSIDE                 | 1.567                                                        | 4.232                          | 826.31             | 3496.70            | 6.632                          | 684.81             | 4541.32            |
| A_68_P24025038 | chr5:118620106-118620150                          | NM_007545:356            | Hrk           | INSIDE                 | 1.566                                                        | 2.149                          | 1563.84            | 3361.45            | 3.366                          | 1428.17            | 4806.89            |
| A_68_P25503044 | chr7:134072503-134072547                          | NM_172747:132            | Ketd13        | INSIDE                 | 1.566                                                        | 5.367                          | 1536.35            | 8245.63            | 8.404                          | 1331.12            | 11186.38           |
| A_68_P30114898 | chr15:31460199-31460243                           | NM_172606:572            | Marchf6       | INSIDE                 | 1.566                                                        | 1.520                          | 2694.46            | 4094.33            | 2.380                          | 2251.11            | 5357.45            |
| A_68_P26400215 | chr9:31193897-31193941                            | NM_172766:142            | Nfirkb        | INSIDE                 | 1.566                                                        | 3.163                          | 6901.85            | 21828.89           | 4.954                          | 5027.00            | 24903.77           |
| A_68_P23544553 | chr5:24414393-24414437                            | NM_001170555:-87         | Prkag2        | PROMOTER               | 1.566                                                        | 3.308                          | 1145.83            | 3790.78            | 5.181                          | 1015.40            | 5261.24            |
| A_68_P31106682 | chr17:25981519-25981564                           | NM_145999:255            | Rhot2         | INSIDE                 | 1.566                                                        | 5.770                          | 2491.85            | 14378.33           | 9.036                          | 1778.26            | 16068.59           |
| A_68_P26996375 | chr10:21713739-21713783                           | NM_011361:-711           | Sgk1          | PROMOTER               | 1.566                                                        | 3.211                          | 605.84             | 1945.46            | 5.029                          | 456.14             | 2293.94            |
| A_68_P29937469 | chr14:118633887-118633936                         | NM_177753:2341           | Sox21         | INSIDE                 | 1.566                                                        | 2.106                          | 666.97             | 1404.33            | 3.298                          | 548.73             | 1809.84            |
| A_68_P24425595 | A_68_P24425595                                    | Unknown                  |               | Unknown                | 1.566                                                        | 4.863                          | 796.97             | 3875.36            | 7.616                          | 735.68             | 5602.61            |
| A_68_P27644170 | chr11:22968078-22968122                           | ENSMUST00000128996:103   |               | INSIDE                 | 1.566                                                        | 3.114                          | 326.32             | 1016.16            | 4.878                          | 341.56             | 1666.04            |
| A_68_P20893089 | chr1:185857699-185857743                          | NM_028516:157            | 1700056E22Rik | INSIDE                 | 1.565                                                        | 3.564                          | 2094.13            | 7462.54            | 5.577                          | 1749.00            | 9754.76            |
| A_68_P28513307 | chr12:70298223-70298267                           | NR_033222:47             | 9330151L19Rik | INSIDE                 | 1.565                                                        | 5.402                          | 2373.03            | 12819.39           | 8.457                          | 1959.92            | 16574.74           |
| A_68_P28743070 | chr12:112513574-112513618                         | NM_033603:4275           | Amn           | INSIDE                 | 1.565                                                        | 2.620                          | 686.38             | 1798.21            | 4.101                          | 589.50             | 2417.74            |
| A_68_P23295623 | chr4:128900595-128900639                          | NM_001033189:25071       | C77080        | INSIDE                 | 1.565                                                        | 2.201                          | 993.95             | 2187.89            | 3.445                          | 861.28             | 2967.49            |
| A_68_P23539566 | chr5:23536151-23536195                            | NM_053090:329            | Fam126a       | INSIDE                 | 1.565                                                        | 4.054                          | 2121.20            | 8598.55            | 6.346                          | 1830.88            | 11618.57           |
| A_68_P31484544 | chr18:9212850-9212894                             | NM_008058:19             | Fzd8          | INSIDE                 | 1.565                                                        | 2.801                          | 892.40             | 2499.57            | 4.384                          | 806.66             | 3536.09            |
| A_68_P27289029 | chr10:80809838-80809882                           | NM_001163165:3311        | Hmg20b        | INSIDE                 | 1.565                                                        | 7.179                          | 2823.24            | 20269.19           | 11.233                         | 1862.01            | 20916.80           |
| A_68_P21839351 | chr2:167906222-167906266                          | NM_021409:-259           | Pard6b        | PROMOTER               | 1.565                                                        | 6.818                          | 1258.10            | 8577.99            | 10.671                         | 1114.90            | 11897.11           |
| A_68_P24979352 | chr7:16638192-16638236                            | AK008102:4421            |               | DOWNSTREAM             | 1.565                                                        | 1.509                          | 1254.00            | 1892.14            | 2.361                          | 1022.36            | 2413.86            |
| A_68_P28836964 | chr13:14157071-14157115                           | NM_194262:1034           | Arid4b        | INSIDE                 | 1.564                                                        | 2.482                          | 844.98             | 2096.93            | 3.880                          | 657.33             | 2550.72            |
| A_68_P29110678 | chr13:68721295-68721339                           | NM_027123:192            | Fastkd3       | INSIDE                 | 1.564                                                        | 2.559                          | 2112.04            | 5405.13            | 4.002                          | 1553.20            | 6215.74            |
| A_68_P32142001 | chr19:46150433-46150477                           | NM_001039351:102         | Nolc1         | INSIDE                 | 1.564                                                        | 2.312                          | 2268.24            | 5243.62            | 3.616                          | 1941.60            | 7020.26            |
| A_68_P29269012 | chr13:101322550-101322594                         | NM_008756:-119           | Ocln          | PROMOTER               | 1.564                                                        | 2.208                          | 944.00             | 2084.61            | 3.455                          | 1005.10            | 3472.29            |
| A_68_P21417962 | chr2:90420971-90421015                            | NM_008982:-188           | Ptpnj         | PROMOTER               | 1.564                                                        | 4.295                          | 2423.28            | 10407.62           | 6.717                          | 1930.35            | 12966.08           |
| A_68_P28595365 | chr12:85262189-85262233                           | ENSMUST0000085215:584    |               | INSIDE                 | 1.564                                                        | 2.328                          | 3510.08            | 8172.80            | 3.641                          | 2840.92            | 10345.21           |
| A_68_P28691640 | chr12:103707382-103707426                         | NM_013747:-715           | Golga5        | PROMOTER               | 1.563                                                        | 6.121                          | 432.66             | 2648.22            | 9.568                          | 300.97             | 2879.67            |
| A_68_P23837522 | chr5:81449591-81449635                            | NM_198702:-1005          | Lphn3         | PROMOTER               | 1.563                                                        | 4.017                          | 1797.47            | 7221.24            | 6.281                          | 1431.07            | 8988.10            |
| A_68_P21623003 | chr2:128926712-128926756                          | NM_009086:3              | Polr1b        | INSIDE                 | 1.563                                                        | 1.939                          | 2491.03            | 4831.30            | 3.031                          | 1831.52            | 5550.56            |
| A_68_P31757526 | chr18:61558105-61558149                           | NM_133249:1959           | Pparc1b       | INSIDE                 | 1.563                                                        | 2.958                          | 4297.15            | 12709.21           | 4.622                          | 3216.73            | 14868.65           |
| A_68_P28963697 | chr13:39052368-39052412                           | NM_001170430:16          | Slc35b3       | INSIDE                 | 1.563                                                        | 1.824                          | 2096.03            | 3823.89            | 2.851                          | 1602.74            | 4569.52            |
| A_68_P30546005 | chr16:11066391-11066435                           | NM_009223:22             | Snn           | INSIDE                 | 1.563                                                        | 1.775                          | 1499.49            | 2661.18            | 2.774                          | 1273.43            | 3531.86            |
| A_68_P23222361 | chr4:114597756-114597800                          | NM_015758:840            | Foxc3         | INSIDE                 | 1.562                                                        | 2.049                          | 646.36             | 1324.62            | 3.200                          | 520.65             | 1666.31            |

| ProbeName      | Target position of probe on CpG island microarray | TargetID                 | GeneSymbol    | CpG island Description | Ratio of relative methylation (TiO <sub>2</sub> -NP/Vehicle) | Sham group                     |                    |                    | TiO <sub>2</sub> -H group      |                    |                    |
|----------------|---------------------------------------------------|--------------------------|---------------|------------------------|--------------------------------------------------------------|--------------------------------|--------------------|--------------------|--------------------------------|--------------------|--------------------|
|                |                                                   |                          |               |                        |                                                              | Relative methylation (Cy5/Cy3) | Cy3 signal (Input) | Cy5 signal (MeDIP) | Relative methylation (Cy5/Cy3) | Cy3 signal (Input) | Cy5 signal (MeDIP) |
| A_68_P28576082 | chr12:81619771-81619815                           | NM_001081421:-184        | Galnt1        | PROMOTER               | 1.562                                                        | 2.629                          | 854.62             | 2246.53            | 4.105                          | 779.49             | 3200.03            |
| A_68_P31790105 | chr18:67293085-67293129                           | NM_010307:-373           | Gnal          | PROMOTER               | 1.562                                                        | 2.176                          | 769.95             | 1675.10            | 3.399                          | 684.73             | 2327.47            |
| A_68_P23261232 | chr4:122866227-122866271                          | NM_174998:5502           | Hpcal4        | INSIDE                 | 1.562                                                        | 3.900                          | 3399.56            | 13256.62           | 6.092                          | 2528.50            | 15404.63           |
| A_68_P29702031 | chr14:70953904-70953948                           | NM_021877:64             | Hr            | INSIDE                 | 1.562                                                        | 1.626                          | 6204.00            | 10086.09           | 2.539                          | 4768.71            | 12108.55           |
| A_68_P28107247 | chr11:107330576-107330620                         | NM_145823:1436           | Pitpnc1       | INSIDE                 | 1.562                                                        | 1.920                          | 1761.15            | 3381.05            | 2.998                          | 1368.08            | 4102.19            |
| A_68_P24991219 | chr7:19650979-19651023                            | NM_001159671:10965       | Rsph6a        | INSIDE                 | 1.562                                                        | 5.179                          | 3800.91            | 19684.78           | 8.090                          | 2925.80            | 23668.66           |
| A_68_P25954806 | chr8:73421106-73421150                            | NR_002901:-1373          | Snora68       | PROMOTER               | 1.562                                                        | 1.778                          | 2759.35            | 4907.28            | 2.777                          | 2115.56            | 5875.71            |
| A_68_P25504683 | chr7:134376847-134376891                          | NM_146201:-88            | Zfp553        | DIVERGENT_PROMOTER     | 1.562                                                        | 6.493                          | 500.43             | 3249.53            | 10.143                         | 454.10             | 4605.86            |
| A_68_P26430110 | chr9:37155994-37156038                            | NM_001081429:-39         | Ccdc15        | PROMOTER               | 1.561                                                        | 6.025                          | 3644.25            | 21958.08           | 9.405                          | 2772.80            | 26079.27           |
| A_68_P22695196 | chr4:3866420-3866464                              | NM_001190322:382         | Chchd7        | INSIDE                 | 1.561                                                        | 3.322                          | 1286.05            | 4272.59            | 5.187                          | 980.84             | 5087.42            |
| A_68_P28727385 | chr12:109572280-109572324                         | NM_010010:-288           | Cyp46a1       | PROMOTER               | 1.561                                                        | 2.654                          | 4354.11            | 11554.80           | 4.141                          | 3150.60            | 13047.81           |
| A_68_P24636902 | chr6:91066754-91066798                            | NM_018815:44             | Nup210        | INSIDE                 | 1.561                                                        | 4.842                          | 904.94             | 4381.50            | 7.557                          | 808.28             | 6107.96            |
| A_68_P24770499 | chr6:115312049-115312093                          | NM_001127330:832         | Pparg         | INSIDE                 | 1.561                                                        | 1.939                          | 1450.39            | 2812.26            | 3.026                          | 1089.63            | 3297.74            |
| A_68_P26894026 | chr9:123168701-123168745                          | NM_001002267:1185        | Tmem158       | INSIDE                 | 1.561                                                        | 2.872                          | 2065.30            | 5931.81            | 4.485                          | 1627.76            | 7300.04            |
| A_68_P29964713 | chr14:123381923-123381967                         | NM_028651:539            | Tmtc4         | INSIDE                 | 1.561                                                        | 5.108                          | 1203.79            | 6149.55            | 7.972                          | 922.30             | 7352.89            |
| A_68_P31675568 | chr18:46357840-46357884                           | NM_001170855:610         | Trim36        | INSIDE                 | 1.561                                                        | 2.855                          | 486.55             | 1389.25            | 4.458                          | 453.71             | 2022.68            |
| A_68_P28082865 | chr11:102878532-102878576                         | NM_026551:-93            | Deakd         | PROMOTER               | 1.560                                                        | 5.102                          | 5424.26            | 27675.60           | 7.959                          | 4348.58            | 34611.79           |
| A_68_P28463190 | chr12:58643591-58643635                           | NM_008259:3496           | Foxa1         | INSIDE                 | 1.560                                                        | 2.253                          | 1457.12            | 3283.00            | 3.514                          | 1177.59            | 4138.56            |
| A_68_P29605899 | chr14:52924704-52924752                           | NM_019721:71             | Mettl3        | INSIDE                 | 1.560                                                        | 3.087                          | 740.61             | 2286.38            | 4.816                          | 590.71             | 2845.04            |
| A_68_P23541414 | chr5:23889472-23889516                            | NM_008713:18858          | Nos3          | INSIDE                 | 1.560                                                        | 1.597                          | 1009.38            | 1612.02            | 2.491                          | 853.11             | 2125.19            |
| A_68_P31420718 | chr17:87424300-87424344                           | NM_008838:419            | Pigf          | INSIDE                 | 1.560                                                        | 1.566                          | 712.72             | 1116.06            | 2.444                          | 619.81             | 1514.57            |
| A_68_P29143670 | chr13:74147870-74147914                           | NM_182839:1026           | Tppp          | INSIDE                 | 1.560                                                        | 3.518                          | 1149.79            | 4045.47            | 5.489                          | 940.34             | 5161.41            |
| A_68_P31257913 | chr17:56856203-56856247                           | NM_178926:120            | Vmac          | INSIDE                 | 1.560                                                        | 1.548                          | 592.48             | 917.36             | 2.415                          | 522.90             | 1262.62            |
| A_68_P24786877 | chr6:118405159-118405203                          | NM_028335:344            | Zfp248        | INSIDE                 | 1.560                                                        | 2.221                          | 2692.98            | 5980.02            | 3.464                          | 2110.48            | 7311.15            |
| A_68_P32565205 | chrX:98893158-98893202                            | ENSMUST00000073812:-5991 |               | PROMOTER               | 1.560                                                        | 6.701                          | 3873.46            | 25954.72           | 10.456                         | 1949.34            | 20382.57           |
| A_68_P20876216 | chr1:182413344-182413388                          | NM_001081227:269         | 6330403A02Rik | INSIDE                 | 1.559                                                        | 1.478                          | 4002.81            | 5914.28            | 2.304                          | 3159.73            | 7278.97            |
| A_68_P26486134 | chr9:47339844-47339888                            | NM_001025600:1432        | Cadm1         | INSIDE                 | 1.559                                                        | 1.847                          | 612.83             | 1132.05            | 2.880                          | 470.46             | 1354.71            |
| A_68_P28293506 | chr12:25781121-25781165                           | NM_010496:-185           | Id2           | PROMOTER               | 1.559                                                        | 2.315                          | 4038.43            | 9349.15            | 3.609                          | 3161.10            | 11406.85           |
| A_68_P25954897 | chr8:73438085-73438129                            | NM_173013:8234           | Mtap1s        | INSIDE                 | 1.559                                                        | 4.956                          | 4668.80            | 23140.70           | 7.727                          | 3349.62            | 25881.64           |
| A_68_P23972071 | chr5:108890061-108890105                          | NM_172716:-268           | Pegf3         | PROMOTER               | 1.559                                                        | 1.706                          | 2087.61            | 3562.17            | 2.661                          | 1779.09            | 4734.15            |
| A_68_P22341205 | chr3:94690730-94690774                            | NM_008945:128            | Psmb4         | INSIDE                 | 1.559                                                        | 2.185                          | 1573.79            | 3438.45            | 3.406                          | 1288.28            | 4387.92            |
| A_68_P26932995 | chr10:9620910-9620954                             | NM_001081344:-94         | Stxbp5        | PROMOTER               | 1.559                                                        | 2.555                          | 589.32             | 1505.86            | 3.985                          | 591.01             | 2355.10            |
| A_68_P23545743 | chr5:24606691-24606735                            | NR_027851:-80            | 2900005115Rik | DIVERGENT_PROMOTER     | 1.558                                                        | 2.903                          | 729.35             | 2117.61            | 4.523                          | 624.82             | 2825.84            |
| A_68_P28752038 | chr12:113960892-113960936                         | NM_001024602:530         | AW555464      | INSIDE                 | 1.558                                                        | 2.278                          | 1280.40            | 2916.80            | 3.548                          | 1133.46            | 4021.72            |
| A_68_P28041452 | chr11:95775809-95775854                           | NM_008081:354            | B4galnt2      | INSIDE                 | 1.558                                                        | 4.699                          | 3119.17            | 14657.35           | 7.323                          | 2688.16            | 19685.59           |
| A_68_P24222816 | chr6:7794688-7794732                              | NM_052993:-513           | C1galnt1      | PROMOTER               | 1.558                                                        | 2.112                          | 471.99             | 996.61             | 3.290                          | 390.46             | 1284.47            |
| A_68_P29651430 | chr14:62305865-62305909                           | NR_028264:4676           | Dleu2         | PROMOTER               | 1.558                                                        | 4.143                          | 1151.74            | 4771.58            | 6.455                          | 932.74             | 6020.70            |
| A_68_P24994096 | chr7:20158742-20158786                            | NM_027189:-72            | Gemin7        | DIVERGENT_PROMOTER     | 1.558                                                        | 1.518                          | 990.39             | 1503.27            | 2.364                          | 942.86             | 2229.39            |
| A_68_P25587734 | chr7:148445714-148445758                          | NM_001081118:31002       | Phrf1         | INSIDE                 | 1.558                                                        | 7.229                          | 1689.14            | 12210.11           | 11.262                         | 1175.85            | 13242.93           |
| A_68_P26203094 | chr8:120022462-120022506                          | NM_172285:294            | Pleg2         | INSIDE                 | 1.558                                                        | 2.890                          | 674.71             | 1949.84            | 4.503                          | 610.32             | 2748.25            |
| A_68_P25086855 | chr7:51591550-51591594                            | NM_001034115:25939       | Shank1        | INSIDE                 | 1.558                                                        | 3.042                          | 2355.54            | 7164.91            | 4.738                          | 1933.02            | 9158.01            |
| A_68_P25844872 | chr8:49076065-49076109                            | NM_133791:-181           | Wwc2          | PROMOTER               | 1.558                                                        | 3.399                          | 3388.99            | 11519.48           | 5.297                          | 3233.27            | 17126.42           |
| A_68_P20737714 | chr1:157264468-157264512                          | NM_011273:84             | Xpr1          | INSIDE                 | 1.558                                                        | 3.906                          | 11830.67           | 46212.57           | 6.084                          | 9122.39            | 55504.65           |
| A_68_P27274520 | chr10:77945131-77945175                           | ENSMUST00000069431:5435  |               | DOWNSTREAM             | 1.558                                                        | 2.753                          | 1617.45            | 4452.65            | 4.290                          | 1515.23            | 6500.21            |
| A_68_P28094671 | chr11:105042686-105042730                         | NR_027956:39             | 1700052K11Rik | INSIDE                 | 1.557                                                        | 4.459                          | 593.08             | 2644.78            | 6.941                          | 610.23             | 4235.88            |
| A_68_P24449862 | chr6:52264017-52264061                            | NM_007966:547            | Evx1          | INSIDE                 | 1.557                                                        | 3.027                          | 2102.31            | 6363.00            | 4.712                          | 1730.99            | 8155.65            |
| A_68_P32147197 | chr19:47089479-47089523                           | NM_001164363:179         | Nt5c2         | INSIDE                 | 1.557                                                        | 5.384                          | 1670.04            | 8991.04            | 8.381                          | 1366.80            | 11454.95           |
| A_68_P25524908 | chr7:138009867-138009911                          | NM_133942:465            | Plekha1       | INSIDE                 | 1.557                                                        | 2.360                          | 671.79             | 1585.13            | 3.673                          | 567.60             | 2084.95            |
| A_68_P23544551 | chr5:24414128-24414172                            | NM_001170555:177         | Prkag2        | INSIDE                 | 1.557                                                        | 3.462                          | 747.36             | 2587.60            | 5.389                          | 642.16             | 3460.72            |
| A_68_P27284238 | chr10:80065633-80065677                           | NM_019575:28             | Scamp4        | INSIDE                 | 1.557                                                        | 3.207                          | 2217.98            | 7114.18            | 4.993                          | 1596.30            | 7969.72            |
| A_68_P26289277 | chr9:7763854-7763898                              | NM_133739:-200           | Tmem123       | PROMOTER               | 1.557                                                        | 2.817                          | 10958.54           | 30867.54           | 4.385                          | 7497.56            | 32880.13           |

| ProbeName      | Target position of probe on CpG island microarray | TargetID                | GeneSymbol    | CpG island Description | Ratio of relative methylation (TiO <sub>2</sub> -NP/Vehicle) | Sham group                     |                    |                    | TiO <sub>2</sub> -H group      |                    |                    |
|----------------|---------------------------------------------------|-------------------------|---------------|------------------------|--------------------------------------------------------------|--------------------------------|--------------------|--------------------|--------------------------------|--------------------|--------------------|
|                |                                                   |                         |               |                        |                                                              | Relative methylation (Cy5/Cy3) | Cy3 signal (Input) | Cy5 signal (MeDIP) | Relative methylation (Cy5/Cy3) | Cy3 signal (Input) | Cy5 signal (MeDIP) |
| A_68_P23297754 | chr4:129318346-129318390                          | NM_001199695-59         | Txlna         | PROMOTER               | 1.557                                                        | 2.710                          | 1619.38            | 4388.83            | 4.220                          | 1351.27            | 5701.81            |
| A_68_P24638863 | chr6:91360911-91360955                            | NM_009527:431           | Wnt7a         | INSIDE                 | 1.557                                                        | 2.287                          | 1572.05            | 3594.67            | 3.560                          | 1198.48            | 4266.50            |
| A_68_P31086417 | chr17:21669593-21669637                           | NM_144515-2888          | Zfp52         | PROMOTER               | 1.557                                                        | 2.758                          | 2058.15            | 5676.25            | 4.293                          | 1665.77            | 7151.85            |
| A_68_P32603677 | chrX:109714158-109714202                          | NM_177747:46            | Zfp711        | INSIDE                 | 1.557                                                        | 2.212                          | 329.82             | 729.70             | 3.444                          | 225.13             | 775.44             |
| A_68_P22312382 | chr3:88004398-88004442                            | ENSMUST00000167043--124 |               | PROMOTER               | 1.557                                                        | 2.729                          | 3170.52            | 8651.45            | 4.248                          | 2563.81            | 10891.21           |
| A_68_P30608335 | chr16:24393852-24393896                           | NR_037954-133           | 1110054M08Rik | PROMOTER               | 1.556                                                        | 4.325                          | 927.24             | 4009.93            | 6.729                          | 797.55             | 5366.96            |
| A_68_P30423567 | chr15:88991606-88991650                           | NM_001159521:12652      | Plxnb2        | INSIDE                 | 1.556                                                        | 5.958                          | 10055.88           | 59914.80           | 9.268                          | 6667.91            | 61798.74           |
| A_68_P30330343 | chr15:73253736-73253780                           | NM_007982-137           | Ptk2          | PROMOTER               | 1.556                                                        | 4.901                          | 771.75             | 3782.28            | 7.628                          | 660.37             | 5037.13            |
| A_68_P23298639 | chr4:129497779-129497823                          | NM_001164745-151        | Ptp4a2        | PROMOTER               | 1.556                                                        | 2.745                          | 1814.44            | 4980.11            | 4.270                          | 1507.66            | 6437.66            |
| A_68_P28071133 | chr11:100820100-100820144                         | NM_008986:11809         | Ptfr          | INSIDE                 | 1.556                                                        | 3.925                          | 2274.88            | 8928.80            | 6.107                          | 1679.27            | 10254.57           |
| A_68_P22236487 | chr3:72861315-72861359                            | NM_198864-471           | Slitrk3       | PROMOTER               | 1.556                                                        | 1.938                          | 2102.13            | 4073.97            | 3.015                          | 1678.91            | 5062.21            |
| A_68_P24009031 | chr5:115777029-115777073                          | NM_025573-135           | Srsf9         | PROMOTER               | 1.556                                                        | 4.084                          | 2154.06            | 8797.49            | 6.357                          | 1708.11            | 10857.85           |
| A_68_P25056451 | chr7:37481970-37482014                            | NM_172298-1144          | Tshz3         | PROMOTER               | 1.556                                                        | 2.088                          | 1067.78            | 2229.64            | 3.249                          | 934.35             | 3035.37            |
| A_68_P31922246 | chr19:4283254-4283298                             | NM_026720-139           | Ankrd13d      | PROMOTER               | 1.555                                                        | 3.090                          | 3143.54            | 9713.27            | 4.806                          | 2202.06            | 10583.65           |
| A_68_P31867752 | chr18:81130655-81130699                           | NM_001201569:121        | Atp9b         | INSIDE                 | 1.555                                                        | 3.281                          | 3663.16            | 12018.74           | 5.101                          | 3085.38            | 15738.90           |
| A_68_P22941962 | chr4:56877715-56877759                            | NM_018761:347           | Cttnal1       | INSIDE                 | 1.555                                                        | 6.301                          | 881.48             | 5553.93            | 9.797                          | 740.94             | 7259.07            |
| A_68_P29751456 | chr14:79851782-79851826                           | NM_001034882:163        | Gm5465        | INSIDE                 | 1.555                                                        | 2.370                          | 3615.36            | 8570.06            | 3.685                          | 2881.89            | 10619.67           |
| A_68_P23230189 | chr4:116299784-116299829                          | NM_001081475:296        | Nasp          | INSIDE                 | 1.555                                                        | 1.757                          | 1532.01            | 2691.16            | 2.732                          | 1330.79            | 3635.84            |
| A_68_P20040932 | chr1:13363158-13363202                            | NM_001077695:984        | Ncoa2         | INSIDE                 | 1.555                                                        | 1.573                          | 1015.20            | 1596.89            | 2.446                          | 928.22             | 2270.58            |
| A_68_P28174632 | chr11:118769905-118769949                         | NM_001024931:960        | Rbfox3        | INSIDE                 | 1.555                                                        | 2.369                          | 1467.31            | 3476.28            | 3.685                          | 1339.73            | 4937.01            |
| A_68_P22383504 | chr3:102739949-102739993                          | NM_011516:53            | Syep1         | INSIDE                 | 1.555                                                        | 3.031                          | 522.26             | 1582.80            | 4.713                          | 383.30             | 1806.57            |
| A_68_P24951859 | chr7:5012645-5012689                              | NM_001205231-1078       | U2af2         | PROMOTER               | 1.555                                                        | 1.754                          | 3975.91            | 6972.82            | 2.727                          | 2829.09            | 7714.78            |
| A_68_P24979382 | chr7:16646941-16646985                            |                         |               | Unknown                | 1.555                                                        | 4.452                          | 3071.18            | 13673.68           | 6.922                          | 2294.18            | 15879.60           |
| A_68_P21755504 | chr2:153354420-153354464                          | NM_001134300:1265       | 8430427H17Rik | INSIDE                 | 1.554                                                        | 4.392                          | 2757.42            | 12109.24           | 6.824                          | 2447.02            | 16699.70           |
| A_68_P31157235 | chr17:35183322-35183366                           | NM_013600:207           | Msh5          | INSIDE                 | 1.554                                                        | 1.393                          | 1449.87            | 2019.11            | 2.164                          | 1177.43            | 2547.74            |
| A_68_P21073067 | chr2:25430182-25430226                            | NM_029293:187           | Phpt1         | INSIDE                 | 1.554                                                        | 4.301                          | 8690.48            | 37378.51           | 6.683                          | 6210.23            | 41501.24           |
| A_68_P23331577 | chr4:135543069-135543113                          | NM_025411:69            | 1110049F12Rik | INSIDE                 | 1.553                                                        | 3.233                          | 1282.56            | 4146.47            | 5.022                          | 1113.13            | 5590.41            |
| A_68_P22682769 | chr3:157610620-157610664                          | NM_001013806:213        | Ankrd13c      | INSIDE                 | 1.553                                                        | 4.429                          | 3140.67            | 13909.20           | 6.876                          | 2744.75            | 18872.23           |
| A_68_P24205541 | chr6:4551256-4551300                              | NM_145398:213           | Casd1         | INSIDE                 | 1.553                                                        | 4.127                          | 993.11             | 4098.52            | 6.408                          | 828.17             | 5306.98            |
| A_68_P27812111 | chr11:54600916-54600960                           | NM_178626:267           | Cdc42se2      | INSIDE                 | 1.553                                                        | 2.021                          | 2859.81            | 5779.07            | 3.138                          | 2218.76            | 6963.45            |
| A_68_P29142604 | chr13:73984411-73984456                           | NM_028186:646           | Nkd2          | INSIDE                 | 1.553                                                        | 2.001                          | 1418.80            | 2838.52            | 3.107                          | 1209.81            | 3759.14            |
| A_68_P21775093 | chr2:156904079-156904123                          | NM_001164663:901        | 9830001H06Rik | INSIDE                 | 1.552                                                        | 3.069                          | 1296.16            | 3978.46            | 4.764                          | 1121.73            | 5344.35            |
| A_68_P24423144 | chr6:47403969-47404013                            | NM_012042-332           | Cul1          | PROMOTER               | 1.552                                                        | 7.853                          | 739.60             | 5808.22            | 12.189                         | 704.37             | 8585.29            |
| A_68_P22128832 | chr3:51080406-51080450                            | NM_023502:49481         | Eif2          | INSIDE                 | 1.552                                                        | 2.100                          | 2655.74            | 5575.74            | 3.259                          | 2102.07            | 6851.41            |
| A_68_P25892520 | chr8:60131247-60131291                            | NM_001167981:584        | Galnt7        | INSIDE                 | 1.552                                                        | 2.796                          | 777.11             | 2172.51            | 4.339                          | 632.87             | 2746.20            |
| A_68_P22311352 | chr3:87826975-87827019                            | NM_022031:4437          | Hapln2        | INSIDE                 | 1.552                                                        | 1.404                          | 4589.08            | 6441.50            | 2.178                          | 3396.94            | 7399.58            |
| A_68_P22661977 | chr3:153991290-153991334                          | NM_010713:2212          | Lhx8          | INSIDE                 | 1.552                                                        | 2.620                          | 2433.89            | 6377.55            | 4.067                          | 2210.04            | 8988.50            |
| A_68_P28991174 | chr13:43711396-43711440                           | NM_183204:253           | Rnf182        | INSIDE                 | 1.552                                                        | 4.911                          | 1583.61            | 7776.79            | 7.619                          | 1313.01            | 10004.08           |
| A_68_P31598791 | chr18:31769247-31769291                           | NM_026165:288           | Slc25a46      | INSIDE                 | 1.552                                                        | 3.700                          | 928.88             | 3437.12            | 5.743                          | 845.62             | 4856.30            |
| A_68_P28332010 | chr12:32244021-32244065                           | NM_011867:792           | Slc26a4       | INSIDE                 | 1.552                                                        | 2.591                          | 663.55             | 1719.32            | 4.020                          | 565.21             | 2272.30            |
| A_68_P29745018 | chr14:78707731-78707775                           | NM_011613:98            | Tnfrsf11      | INSIDE                 | 1.552                                                        | 3.653                          | 2008.53            | 7338.06            | 5.671                          | 1580.84            | 8964.18            |
| A_68_P30176277 | chr15:43309087-43309131                           | NM_025736:334           | Tie35         | INSIDE                 | 1.552                                                        | 2.774                          | 2444.85            | 6782.67            | 4.306                          | 2147.63            | 9247.83            |
| A_68_P21311589 | chr2:69735872-69735916                            | NM_001081548:592        | Ubr3          | INSIDE                 | 1.552                                                        | 2.467                          | 2694.52            | 6646.05            | 3.829                          | 2134.09            | 8170.82            |
| A_68_P25268780 | chr7:87947830-87947874                            | NM_016721:365           | Iqgap1        | INSIDE                 | 1.551                                                        | 1.594                          | 2098.11            | 3343.77            | 2.473                          | 1544.84            | 3819.74            |
| A_68_P29222297 | chr13:92901976-92902020                           | NM_009027-549           | Rasgrf2       | PROMOTER               | 1.551                                                        | 15.440                         | 1145.93            | 17693.03           | 23.952                         | 845.42             | 20249.63           |
| A_68_P22883647 | chr4:45542639-45542683                            | NM_001033306:1040       | Shb           | INSIDE                 | 1.551                                                        | 3.693                          | 825.96             | 3050.21            | 5.728                          | 737.06             | 4222.19            |
| A_68_P32036079 | chr19:26680265-26680310                           | NM_011416:638           | Smarca2       | INSIDE                 | 1.551                                                        | 1.658                          | 1913.20            | 3172.21            | 2.571                          | 1502.58            | 3863.03            |
| A_68_P29672994 | chr14:65977929-65977973                           | NM_199029:438           | Zfp395        | INSIDE                 | 1.551                                                        | 0.410                          | 847.18             | 347.45             | 0.636                          | 967.85             | 615.83             |
| A_68_P24425393 | chr6:47974535-47974579                            | NM_001081382:23557      | Zfp777        | INSIDE                 | 1.551                                                        | 3.239                          | 550.43             | 1782.89            | 5.025                          | 529.21             | 2659.20            |
| A_68_P22454038 | chr3:117062948-117062993                          | NM_177664:824           | D3Bwg0562c    | INSIDE                 | 1.550                                                        | 2.469                          | 1291.03            | 3187.15            | 3.827                          | 1048.07            | 4011.15            |
| A_68_P30361565 | chr15:78503546-78503590                           | NM_183141:44975         | Elnf2         | INSIDE                 | 1.550                                                        | 3.398                          | 991.25             | 3368.41            | 5.267                          | 733.37             | 3862.41            |



| ProbeName      | Target position of probe on CpG island microarray | TargetID           | GeneSymbol    | CpG island Description | Ratio of relative methylation (TiO <sub>2</sub> -NP/Vehicle) | Sham group                     |                    |                    | TiO <sub>2</sub> -H group      |                    |                    |
|----------------|---------------------------------------------------|--------------------|---------------|------------------------|--------------------------------------------------------------|--------------------------------|--------------------|--------------------|--------------------------------|--------------------|--------------------|
|                |                                                   |                    |               |                        |                                                              | Relative methylation (Cy5/Cy3) | Cy3 signal (Input) | Cy5 signal (MeDIP) | Relative methylation (Cy5/Cy3) | Cy3 signal (Input) | Cy5 signal (MeDIP) |
| A_68_P25412180 | chr7:117365261-117365305                          | NM_009302:66       | Swap70        | INSIDE                 | 1.550                                                        | 5.265                          | 1061.01            | 5585.94            | 8.159                          | 899.62             | 7339.83            |
| A_68_P28167342 | chr11:117671257-117671301                         | NM_009304:298      | Syngn2        | INSIDE                 | 1.550                                                        | 2.821                          | 975.53             | 2752.34            | 4.374                          | 772.61             | 3379.42            |
| A_68_P23541913 | chr5:23953475-23953519                            | NM_022418:168      | Tmub1         | INSIDE                 | 1.550                                                        | 2.442                          | 1120.23            | 2736.03            | 3.785                          | 956.45             | 3620.14            |
| A_68_P22492339 | chr3:124023918-124023962                          | NM_146140:-14      | Tram111       | PROMOTER               | 1.550                                                        | 1.883                          | 1710.74            | 3222.01            | 2.919                          | 1366.00            | 3986.99            |
| A_68_P31301686 | A_68_P31301686                                    |                    |               | Unknown                | 1.550                                                        | 2.978                          | 386.38             | 1150.55            | 4.615                          | 316.07             | 1458.75            |
| A_68_P29055344 | A_68_P29055344                                    |                    |               | Unknown                | 1.550                                                        | 2.883                          | 1046.86            | 3018.37            | 4.468                          | 814.21             | 3637.95            |
| A_68_P32143654 | chr19:46469962-46470006                           | NM_016860:241      | Actr1a        | INSIDE                 | 1.549                                                        | 3.348                          | 2979.00            | 9972.94            | 5.187                          | 2460.95            | 12764.18           |
| A_68_P30483162 | chr15:99803108-99803152                           | NM_001024526:-80   | Larp4         | PROMOTER               | 1.549                                                        | 1.794                          | 1419.86            | 2547.83            | 2.780                          | 1207.46            | 3356.65            |
| A_68_P30990393 | chr16:96212588-96212632                           | NM_019537:-100     | Psmg1         | PROMOTER               | 1.549                                                        | 3.381                          | 2069.66            | 6997.91            | 5.238                          | 1779.04            | 9318.84            |
| A_68_P23227949 | chr4:115817024-115817068                          | NM_026547:175      | 1520402A15Rik | INSIDE                 | 1.548                                                        | 3.087                          | 1615.03            | 4985.29            | 4.777                          | 1317.12            | 6292.45            |
| A_68_P27288890 | chr10:80788199-80788243                           | NM_027381:4373     | 2510012J08Rik | INSIDE                 | 1.548                                                        | 5.347                          | 2882.86            | 15415.59           | 8.279                          | 2017.82            | 16705.88           |
| A_68_P32260649 | chrX:11714704-11714748                            | NM_001168321:22755 | Bcor          | INSIDE                 | 1.548                                                        | 1.375                          | 1999.44            | 2748.78            | 2.128                          | 960.24             | 2043.29            |
| A_68_P27781640 | chr11:48982878-48982922                           | NM_172793:17691    | Btnl9         | INSIDE                 | 1.548                                                        | 4.075                          | 2307.06            | 9401.42            | 6.310                          | 1769.63            | 11166.23           |
| A_68_P30686262 | chr16:38483294-38483338                           | NM_009855:24304    | Cd80          | INSIDE                 | 1.548                                                        | 3.799                          | 3027.88            | 11502.80           | 5.880                          | 2326.95            | 13681.60           |
| A_68_P31252966 | chr17:56095674-56095719                           | NM_015766:3651     | Ebi3          | INSIDE                 | 1.548                                                        | 3.023                          | 2670.05            | 8070.77            | 4.679                          | 1946.40            | 9107.33            |
| A_68_P30452934 | chr15:94374073-94374117                           | NM_029926:4        | Irak4         | INSIDE                 | 1.548                                                        | 2.034                          | 1421.64            | 2891.15            | 3.149                          | 1041.72            | 3279.94            |
| A_68_P27011028 | chr10:24589929-24589973                           | NM_001166416:159   | Med23         | INSIDE                 | 1.548                                                        | 4.361                          | 469.79             | 2048.95            | 6.752                          | 420.87             | 2841.82            |
| A_68_P23439842 | chr4:155027173-155027217                          | NM_011985:299      | Mmp23         | INSIDE                 | 1.548                                                        | 1.467                          | 1762.94            | 2585.39            | 2.270                          | 1420.78            | 3224.59            |
| A_68_P25585272 | chr7:148043313-148043357                          | NM_053194:39       | Ric8          | INSIDE                 | 1.548                                                        | 1.798                          | 1175.99            | 2113.99            | 2.783                          | 980.39             | 2728.28            |
| A_68_P21748557 | chr2:152119766-152119810                          | NM_024196:181      | Tbc1d20       | INSIDE                 | 1.548                                                        | 5.502                          | 3289.69            | 18098.61           | 8.515                          | 2765.79            | 23551.72           |
| A_68_P31744348 | chr18:58995914-58995958                           | NM_175506:-481     | Adams19       | PROMOTER               | 1.547                                                        | 1.578                          | 2334.17            | 3684.29            | 2.442                          | 2112.33            | 5158.87            |
| A_68_P20947409 | chr1:194956122-194956166                          | NM_145415:301      | Diexf         | INSIDE                 | 1.547                                                        | 1.635                          | 441.40             | 721.86             | 2.530                          | 342.33             | 866.11             |
| A_68_P29713887 | chr14:73109166-73109210                           | NM_207636:622      | Fndc3a        | INSIDE                 | 1.547                                                        | 1.720                          | 371.99             | 639.79             | 2.661                          | 324.89             | 864.39             |
| A_68_P29700471 | chr14:70689220-70689264                           | NM_008915:14       | Ppp3cc        | INSIDE                 | 1.547                                                        | 2.361                          | 288.34             | 680.82             | 3.653                          | 268.34             | 980.17             |
| A_68_P21491162 | chr2:104689920-104689964                          | NM_178695:65       | Prrg4         | INSIDE                 | 1.547                                                        | 2.682                          | 1472.56            | 3950.02            | 4.149                          | 1224.68            | 5081.32            |
| A_68_P30642387 | chr16:30550318-30550362                           | NM_172614:324      | Tmem44        | INSIDE                 | 1.547                                                        | 1.662                          | 2144.39            | 3563.03            | 2.571                          | 1758.73            | 4521.84            |
| A_68_P21084621 | chr2:27281926-27281970                            | NM_009500:397      | Vav2          | INSIDE                 | 1.547                                                        | 2.812                          | 1136.36            | 3195.93            | 4.352                          | 994.41             | 4327.32            |
| A_68_P30133051 | chr15:35301203-35301247                           | NM_177151:-76      | Vps13b        | PROMOTER               | 1.547                                                        | 3.342                          | 818.23             | 2734.90            | 5.169                          | 728.49             | 3765.74            |
| A_68_P32573118 | chrX:100677473-100677517                          | NR_001463:1078     | Xist          | INSIDE                 | 1.547                                                        | 3.534                          | 3844.65            | 13587.88           | 5.467                          | 1405.29            | 7682.44            |
| A_68_P30150543 | chr15:38591462-38591506                           | NM_025494:-174     | Atp6v1c1      | PROMOTER               | 1.546                                                        | 2.549                          | 521.34             | 1328.89            | 3.940                          | 401.56             | 1582.16            |
| A_68_P31676224 | chr18:46471665-46471709                           | NM_001160399:-104  | Ccdc112       | PROMOTER               | 1.546                                                        | 5.163                          | 5877.27            | 30343.65           | 7.984                          | 4145.92            | 33101.35           |
| A_68_P31741000 | chr18:58369346-58369390                           | NM_010181:212      | Fbn2          | INSIDE                 | 1.546                                                        | 5.117                          | 3637.60            | 18612.62           | 7.912                          | 2582.50            | 20433.97           |
| A_68_P25957808 | chr8:74135004-74135048                            | NM_146211:104      | Glt25d1       | INSIDE                 | 1.546                                                        | 2.720                          | 1477.88            | 4019.96            | 4.206                          | 1203.59            | 5061.77            |
| A_68_P31117120 | chr17:27694784-27694828                           | NM_001166476:1209  | Hmga1-rs1     | INSIDE                 | 1.546                                                        | 1.715                          | 1484.34            | 2545.31            | 2.651                          | 1267.24            | 3358.95            |
| A_68_P24535483 | chr6:71221618-71221662                            | NM_145568:-372     | Krec1         | DIVERGENT_PROMOTER     | 1.546                                                        | 7.603                          | 684.67             | 5205.32            | 11.755                         | 621.59             | 7307.05            |
| A_68_P24656000 | chr6:94233185-94233229                            | NM_001029850:692   | Magi1         | INSIDE                 | 1.546                                                        | 1.641                          | 4535.04            | 7442.85            | 2.537                          | 3708.37            | 9406.35            |
| A_68_P31095624 | chr17:24278101-24278145                           | NM_001080773:434   | Pdpk1         | INSIDE                 | 1.546                                                        | 2.407                          | 3121.36            | 7513.71            | 3.722                          | 2605.17            | 9697.66            |
| A_68_P27804984 | chr11:53292506-53292550                           | NM_183173:1169     | Ankrd43       | INSIDE                 | 1.545                                                        | 2.755                          | 606.94             | 1672.19            | 4.257                          | 522.39             | 2223.93            |
| A_68_P24052105 | chr5:123213863-123213907                          | NM_001199676:15535 | Camkk2        | INSIDE                 | 1.545                                                        | 8.285                          | 1777.03            | 14721.93           | 12.803                         | 1302.84            | 16679.92           |
| A_68_P29992340 | chr5:7079603-7079647                              | NM_001113386:53    | Lifr          | INSIDE                 | 1.545                                                        | 2.541                          | 797.88             | 2027.27            | 3.925                          | 630.42             | 2474.26            |
| A_68_P31708189 | chr18:52688590-52688634                           | NM_010728:750      | Lox           | INSIDE                 | 1.545                                                        | 1.456                          | 1093.75            | 1592.08            | 2.249                          | 860.22             | 1934.74            |
| A_68_P25992691 | chr8:81636666-81636710                            | NM_178267:84353    | Zfp827        | INSIDE                 | 1.545                                                        | 9.692                          | 5183.46            | 50237.54           | 14.970                         | 3215.13            | 48129.18           |
| A_68_P22129414 | chr3:51200267-51200311                            | NM_026358:181      | 4930583H14Rik | INSIDE                 | 1.544                                                        | 6.105                          | 1129.35            | 6894.20            | 9.424                          | 898.09             | 8463.53            |
| A_68_P24942894 | chr6:148893997-148894041                          | NM_019643:936      | Fam60a        | INSIDE                 | 1.544                                                        | 4.314                          | 2874.14            | 12399.49           | 6.660                          | 2592.69            | 17268.14           |
| A_68_P25049946 | chr7:36340772-36340816                            | NM_033080:153      | Nudt19        | INSIDE                 | 1.544                                                        | 3.580                          | 1871.68            | 6700.77            | 5.526                          | 1707.74            | 9437.16            |
| A_68_P23527584 | chr5:21243055-21243099                            | NM_028431:99       | Pmpcb         | INSIDE                 | 1.544                                                        | 3.765                          | 910.72             | 3429.27            | 5.814                          | 810.88             | 4714.20            |
| A_68_P27614514 | chr11:17059211-17059255                           | NM_024459:-68      | Ppp3r1        | PROMOTER               | 1.544                                                        | 2.576                          | 1662.81            | 4284.09            | 3.979                          | 1513.69            | 6022.63            |
| A_68_P21740964 | chr2:150612823-150612867                          | NM_153781:313      | Pygb          | INSIDE                 | 1.544                                                        | 4.723                          | 1686.40            | 7964.35            | 7.293                          | 1405.35            | 10248.92           |
| A_68_P30669634 | chr16:35363730-35363774                           | NM_133704:252      | Sec22a        | INSIDE                 | 1.544                                                        | 2.387                          | 1288.67            | 3075.84            | 3.686                          | 1150.47            | 4240.27            |
| A_68_P28739967 | chr12:111976055-111976099                         | NM_027149:-82      | Wdr20a        | PROMOTER               | 1.544                                                        | 3.066                          | 1411.64            | 4327.86            | 4.735                          | 1260.98            | 5970.71            |
| A_68_P32151692 | chr19:47806456-47806500                           | NM_026377:233      | 6330577E15Rik | INSIDE                 | 1.543                                                        | 4.098                          | 11852.91           | 48570.74           | 6.323                          | 7969.21            | 50392.81           |

| ProbeName      | Target position of probe on CpG island microarray | TargetID               | GeneSymbol    | CpG island Description | Ratio of relative methylation (TiO <sub>2</sub> -NP/Vehicle) | Sham group                     |                    |                    | TiO <sub>2</sub> -H group      |                    |                    |
|----------------|---------------------------------------------------|------------------------|---------------|------------------------|--------------------------------------------------------------|--------------------------------|--------------------|--------------------|--------------------------------|--------------------|--------------------|
|                |                                                   |                        |               |                        |                                                              | Relative methylation (Cy5/Cy3) | Cy3 signal (Input) | Cy5 signal (MeDIP) | Relative methylation (Cy5/Cy3) | Cy3 signal (Input) | Cy5 signal (MeDIP) |
| A_68_P24357881 | chr6:34730747-34730791                            | NM_178630:337          | Agbl3         | INSIDE                 | 1.543                                                        | 3.147                          | 427.26             | 1344.79            | 4.855                          | 354.26             | 1720.04            |
| A_68_P25957034 | chr8:74004823-74004867                            | NM_001164679:5122      | Ano8          | INSIDE                 | 1.543                                                        | 4.355                          | 2896.34            | 12613.58           | 6.719                          | 2375.92            | 15964.47           |
| A_68_P28175458 | chr11:118903402-118903447                         | NM_013926:-1197        | Cbx8          | PROMOTER               | 1.543                                                        | 2.606                          | 1629.10            | 4245.70            | 4.020                          | 1283.32            | 5159.52            |
| A_68_P27080340 | chr10:39451597-39451641                           | NR_038037:195          | E130307A14Rik | INSIDE                 | 1.543                                                        | 1.585                          | 1856.03            | 2942.01            | 2.446                          | 1386.50            | 3391.38            |
| A_68_P26940374 | chr10:11063250-11063294                           | NM_010146:30           | Epm2a         | INSIDE                 | 1.543                                                        | 2.782                          | 270.82             | 753.53             | 4.294                          | 282.19             | 1211.60            |
| A_68_P26587421 | chr9:65238821-65238865                            | NM_028974:617          | Kbtbd13       | INSIDE                 | 1.543                                                        | 3.366                          | 640.77             | 2157.15            | 5.196                          | 558.74             | 2903.16            |
| A_68_P23801768 | chr5:74591245-74591289                            | NM_026878:-84          | Ras11b        | PROMOTER               | 1.543                                                        | 4.567                          | 3818.49            | 17438.72           | 7.045                          | 3002.06            | 21150.25           |
| A_68_P25195705 | chr7:74903906-74903950                            | NM_183312:700          | Symn          | INSIDE                 | 1.543                                                        | 2.131                          | 1661.38            | 3540.87            | 3.288                          | 1378.62            | 4533.34            |
| A_68_P29964714 | chr14:123382020-123382064                         | NM_028651:441          | Tmtc4         | INSIDE                 | 1.543                                                        | 3.639                          | 289.34             | 1053.04            | 5.616                          | 247.28             | 1388.75            |
| A_68_P32340725 | chrX:39421489-39421533                            | NM_009688:498          | Xiap          | INSIDE                 | 1.543                                                        | 3.144                          | 351.26             | 1104.43            | 4.851                          | 150.06             | 727.98             |
| A_68_P24688740 | chr6:99828403-99828447                            | ENSMUST00000121046:-96 |               | PROMOTER               | 1.543                                                        | 3.656                          | 1559.34            | 5700.35            | 5.642                          | 1234.95            | 6967.17            |
| A_68_P21633051 | chr2:130889050-130889094                          | NM_001163529:478       | Adam33        | INSIDE                 | 1.542                                                        | 2.455                          | 602.88             | 1480.03            | 3.785                          | 522.00             | 1975.90            |
| A_68_P27539535 | chr10:127533910-127533954                         | NM_054078:4094         | Baz2a         | INSIDE                 | 1.542                                                        | 1.931                          | 1625.26            | 3138.52            | 2.978                          | 1391.91            | 4145.42            |
| A_68_P31524836 | chr18:16965652-16965696                           | NM_007664:1884         | Cdh2          | INSIDE                 | 1.542                                                        | 5.347                          | 1273.88            | 6811.52            | 8.243                          | 1060.08            | 8737.75            |
| A_68_P24048238 | chr5:122499986-122500030                          | NM_007804:-2174        | Cux2          | PROMOTER               | 1.542                                                        | 2.754                          | 614.04             | 1691.04            | 4.248                          | 530.72             | 2254.36            |
| A_68_P27930554 | chr11:76015406-76015450                           | NM_027773:-129         | Fam57a        | PROMOTER               | 1.542                                                        | 2.236                          | 2797.45            | 6253.97            | 3.446                          | 2707.12            | 8536.80            |
| A_68_P21339417 | chr2:74601653-74601697                            | NM_010467:638          | Hoxd1         | INSIDE                 | 1.542                                                        | 2.014                          | 1822.69            | 3670.23            | 3.104                          | 1498.07            | 4650.35            |
| A_68_P29448698 | chr14:21553543-21553587                           | NM_010811:220          | Ndst2         | INSIDE                 | 1.542                                                        | 1.813                          | 339.59             | 615.81             | 2.797                          | 289.37             | 809.26             |
| A_68_P29694905 | chr14:69808678-69808722                           | NM_010921:-48          | Nkx3-1        | PROMOTER               | 1.542                                                        | 6.019                          | 1396.90            | 8407.55            | 9.278                          | 1099.45            | 10200.87           |
| A_68_P22180925 | chr3:60806609-60806653                            | NM_008772:-86          | P2ry1         | PROMOTER               | 1.542                                                        | 1.612                          | 1581.70            | 2549.48            | 2.485                          | 1392.53            | 3660.49            |
| A_68_P25962147 | chr8:75095836-75095880                            | NM_144534:-143         | Tmem38a       | DIVERGENT_PROMOTER     | 1.542                                                        | 2.800                          | 1226.51            | 3434.52            | 4.317                          | 1052.87            | 4545.69            |
| A_68_P26521623 | chr9:53418301-53418345                            | NM_144784:133          | Acat1         | INSIDE                 | 1.541                                                        | 3.585                          | 943.56             | 3382.47            | 5.525                          | 828.27             | 4576.50            |
| A_68_P26057102 | chr8:93657583-93657627                            | NM_010241:1791         | Aktip         | INSIDE                 | 1.541                                                        | 3.702                          | 3600.06            | 13328.11           | 5.705                          | 2907.92            | 16588.87           |
| A_68_P27558727 | chr11:4537643-4537687                             | NM_029291:-131         | Ascc2         | DIVERGENT_PROMOTER     | 1.541                                                        | 4.826                          | 3891.78            | 18781.00           | 7.434                          | 2991.62            | 22240.76           |
| A_68_P24063264 | chr5:125342497-125342541                          | NM_144819:73           | Ccdc92        | INSIDE                 | 1.541                                                        | 1.589                          | 1082.41            | 1720.18            | 2.449                          | 961.94             | 2355.74            |
| A_68_P23295047 | chr4:128798459-128798503                          | NM_010471:55           | Hpea          | INSIDE                 | 1.541                                                        | 1.416                          | 875.12             | 1239.51            | 2.183                          | 803.08             | 1753.03            |
| A_68_P23301755 | chr4:130219531-130219575                          | NM_001159603:279       | Pum1          | INSIDE                 | 1.541                                                        | 2.281                          | 1424.00            | 3247.45            | 3.515                          | 1128.39            | 3965.86            |
| A_68_P22207824 | chr3:6677458-6677550                              | NM_013665:8213         | Shox2         | INSIDE                 | 1.541                                                        | 1.628                          | 3214.15            | 5233.73            | 2.510                          | 2755.27            | 6914.40            |
| A_68_P28184189 | chr11:120239967-120240011                         | NM_027980:72           | 2310003H01Rik | INSIDE                 | 1.540                                                        | 3.421                          | 542.84             | 1857.08            | 5.269                          | 466.14             | 2456.01            |
| A_68_P23368580 | chr4:141795400-141795444                          | NM_001109685:-106      | 9030409G11Rik | PROMOTER               | 1.540                                                        | 4.200                          | 12506.51           | 52523.82           | 6.467                          | 9077.38            | 58703.21           |
| A_68_P28112958 | chr11:108286558-108286602                         | NM_029606:1            | Ccdc46        | INSIDE                 | 1.540                                                        | 1.840                          | 1341.81            | 2468.67            | 2.833                          | 1139.15            | 3226.70            |
| A_68_P21832544 | chr2:166731558-166731602                          | NM_023565:-15          | Cse11         | PROMOTER               | 1.540                                                        | 2.158                          | 2544.10            | 5490.79            | 3.323                          | 1922.64            | 6388.29            |
| A_68_P23585886 | chr5:33206293-33206337                            | NM_177786:-55          | Depdc5        | DIVERGENT_PROMOTER     | 1.540                                                        | 1.961                          | 1701.05            | 3335.59            | 3.019                          | 1486.86            | 4489.25            |
| A_68_P21115865 | chr2:32391002-32391046                            | NM_153560:146          | Fam102a       | INSIDE                 | 1.540                                                        | 2.078                          | 1162.78            | 2416.42            | 3.200                          | 965.79             | 3090.04            |
| A_68_P21124370 | chr2:33742800-33742844                            | NM_175184:644          | Fam125b       | INSIDE                 | 1.540                                                        | 2.933                          | 4745.41            | 13920.28           | 4.516                          | 3493.69            | 15778.51           |
| A_68_P28184739 | chr11:120329033-120329077                         | NM_001159328:106       | Hgs           | INSIDE                 | 1.540                                                        | 1.893                          | 2172.26            | 4112.60            | 2.915                          | 1783.07            | 5197.83            |
| A_68_P32132967 | chr19:44637357-44637401                           | NM_176958:35           | Hiflan        | INSIDE                 | 1.540                                                        | 3.012                          | 677.07             | 2039.17            | 4.638                          | 597.35             | 2770.71            |
| A_68_P28997657 | chr13:44826068-44826112                           | NM_001205044:-52       | Jarid2        | PROMOTER               | 1.540                                                        | 2.474                          | 2897.66            | 7168.55            | 3.810                          | 2247.25            | 8561.24            |
| A_68_P29618044 | chr14:56110165-56110209                           | NM_001024645:257       | Lrrc16b       | INSIDE                 | 1.540                                                        | 2.286                          | 3597.59            | 8222.54            | 3.520                          | 3076.47            | 10829.15           |
| A_68_P25581950 | chr7:147234174-147234218                          | NM_010836:791          | Mx3           | INSIDE                 | 1.540                                                        | 2.192                          | 1382.25            | 3030.30            | 3.376                          | 1166.43            | 3937.96            |
| A_68_P23439553 | chr4:154976002-154976046                          | NM_177186:500          | Slc35e2       | INSIDE                 | 1.540                                                        | 2.236                          | 771.25             | 1724.72            | 3.443                          | 614.18             | 2114.67            |
| A_68_P28344356 | chr12:34642925-34642969                           | NM_011658:411          | Twist1        | INSIDE                 | 1.540                                                        | 1.644                          | 423.44             | 696.13             | 2.532                          | 392.98             | 995.14             |
| A_68_P22695192 | chr4:3865915-3865959                              | NM_001190323:-98       | Chchd7        | DIVERGENT_PROMOTER     | 1.539                                                        | 2.922                          | 3388.26            | 9901.35            | 4.496                          | 2546.72            | 11450.11           |
| A_68_P28525474 | chr12:72410830-72410874                           | NM_001190466:-18       | Dact1         | PROMOTER               | 1.539                                                        | 2.050                          | 5746.86            | 11781.79           | 3.155                          | 4667.44            | 14727.36           |
| A_68_P27385041 | chr10:98569996-98570040                           | NM_015737:-750         | Galnt4        | PROMOTER               | 1.539                                                        | 1.907                          | 370.06             | 705.59             | 2.935                          | 285.70             | 838.51             |
| A_68_P31150606 | chr17:33954625-33954670                           | NM_030697:7180         | Kank3         | INSIDE                 | 1.539                                                        | 2.105                          | 592.68             | 1247.40            | 3.239                          | 549.54             | 1780.05            |
| A_68_P22347470 | chr3:95908249-95908293                            | NM_001025613:-179      | Otd7b         | PROMOTER               | 1.539                                                        | 1.937                          | 515.73             | 999.13             | 2.982                          | 384.89             | 1147.91            |
| A_68_P22246600 | chr3:75360381-75360425                            | NM_019745:319          | Pdcd10        | INSIDE                 | 1.539                                                        | 2.256                          | 8011.46            | 18072.48           | 3.472                          | 5244.25            | 18209.34           |
| A_68_P26142832 | chr8:109571961-109572005                          | NM_026513:532          | Pdf           | INSIDE                 | 1.539                                                        | 2.131                          | 1545.36            | 3293.12            | 3.279                          | 1239.71            | 4064.46            |
| A_68_P22680840 | chr3:157229758-157229802                          | NM_011196:-75          | Ptger3        | PROMOTER               | 1.539                                                        | 3.172                          | 1382.86            | 4385.80            | 4.881                          | 1383.01            | 6749.95            |
| A_68_P28314231 | chr12:29320191-29320235                           | NM_011300:606          | Rps7          | INSIDE                 | 1.539                                                        | 1.793                          | 3656.30            | 6553.99            | 2.759                          | 3029.59            | 8358.80            |

| ProbeName      | Target position of probe on CpG island microarray | TargetID                | GeneSymbol    | CpG island Description | Ratio of relative methylation (TiO <sub>2</sub> -NP/Vehicle) | Sham group                     |                    |                    | TiO <sub>2</sub> -H group      |                    |                    |
|----------------|---------------------------------------------------|-------------------------|---------------|------------------------|--------------------------------------------------------------|--------------------------------|--------------------|--------------------|--------------------------------|--------------------|--------------------|
|                |                                                   |                         |               |                        |                                                              | Relative methylation (Cy5/Cy3) | Cy3 signal (Input) | Cy5 signal (MeDIP) | Relative methylation (Cy5/Cy3) | Cy3 signal (Input) | Cy5 signal (MeDIP) |
| A_68_P33007029 | A_68_P33007029                                    |                         |               | Unknown                | 1.539                                                        | 3.724                          | 3393.02            | 12634.27           | 5.729                          | 2908.95            | 16665.78           |
| A_68_P20121782 | chr1:30930313-30930357                            | ENSMUST0000004643:205   |               | INSIDE                 | 1.539                                                        | 1.825                          | 3153.60            | 5755.99            | 2.809                          | 2895.33            | 8133.96            |
| A_68_P26476281 | chr9:45647027-45647071                            | NM_001145947:437        | Bace1         | INSIDE                 | 1.538                                                        | 3.408                          | 1593.42            | 5430.55            | 5.240                          | 1236.49            | 6479.45            |
| A_68_P30349739 | chr15:76487469-76487513                           | NM_019396:3001          | Cyhr1         | INSIDE                 | 1.538                                                        | 2.365                          | 2055.01            | 4860.62            | 3.637                          | 1485.47            | 5402.77            |
| A_68_P27551860 | chr11:3309041-3309085                             | NM_010718:176           | Limk2         | INSIDE                 | 1.538                                                        | 3.518                          | 1658.89            | 5835.56            | 5.410                          | 1398.92            | 7568.53            |
| A_68_P32536210 | chrX:91077357-91077401                            | NM_145630:56            | Pdk3          | INSIDE                 | 1.538                                                        | 3.659                          | 1319.92            | 4829.75            | 5.629                          | 988.31             | 5563.58            |
| A_68_P23981859 | chr5:111209498-111209542                          | NM_001025561:95         | Pus1          | INSIDE                 | 1.538                                                        | 2.394                          | 3325.28            | 7960.55            | 3.681                          | 2575.26            | 9480.36            |
| A_68_P28741731 | chr12:112278009-112278053                         | NM_198023:22            | Rcor1         | INSIDE                 | 1.538                                                        | 3.326                          | 9572.13            | 31835.52           | 5.114                          | 7748.35            | 39625.39           |
| A_68_P26932993 | chr10:9620586-9620630                             | NM_001081344:230        | Stxbp5        | INSIDE                 | 1.538                                                        | 17.246                         | 1505.89            | 25970.25           | 26.529                         | 1250.90            | 33185.50           |
| A_68_P24304143 | chr6:24905716-24905760                            | NM_177013:387           | Tmem229a      | INSIDE                 | 1.538                                                        | 2.687                          | 1431.27            | 3845.77            | 4.133                          | 1315.59            | 5436.84            |
| A_68_P25411826 | chr7:117266404-117266448                          | NM_009516:854           | Wee1          | INSIDE                 | 1.538                                                        | 2.467                          | 904.96             | 2232.32            | 3.794                          | 799.90             | 3034.79            |
| A_68_P26252592 | chr8:128094354-128094398                          | BC072593:-720           |               | PROMOTER               | 1.538                                                        | 8.899                          | 274.41             | 2442.03            | 13.684                         | 230.31             | 3151.62            |
| A_68_P25834612 | chr8:47248897-47248941                            | NM_025747:-5991         | 4933411K20Rik | PROMOTER               | 1.537                                                        | 1.755                          | 5189.64            | 9109.37            | 2.698                          | 4110.67            | 11092.42           |
| A_68_P29587993 | chr14:49066241-49066285                           | NM_172600:236           | 6720456H20Rik | INSIDE                 | 1.537                                                        | 2.300                          | 2572.13            | 5914.65            | 3.534                          | 2101.71            | 7427.21            |
| A_68_P28859761 | chr13:19040366-19040410                           | NM_175007:149           | Amph          | INSIDE                 | 1.537                                                        | 2.967                          | 5674.37            | 16838.28           | 4.562                          | 4718.16            | 21522.00           |
| A_68_P21266439 | chr2:61649898-61649942                            | NM_009322:7411          | Tbr1          | INSIDE                 | 1.537                                                        | 2.571                          | 364.72             | 937.82             | 3.952                          | 383.31             | 1514.93            |
| A_68_P31655791 | chr18:42671723-42671767                           | NM_001039474:604        | Tceerg1       | INSIDE                 | 1.537                                                        | 1.628                          | 1908.82            | 3108.31            | 2.502                          | 1457.80            | 3647.64            |
| A_68_P31982216 | chr19:16855225-16855273                           | NM_173028:169           | Vps13a        | INSIDE                 | 1.537                                                        | 1.643                          | 672.73             | 1105.45            | 2.526                          | 541.01             | 1366.40            |
| A_68_P29102522 | chr13:65360990-65361034                           | ENSMUST00000099425:166  |               | INSIDE                 | 1.537                                                        | 5.390                          | 861.37             | 4642.76            | 8.282                          | 759.18             | 6287.68            |
| A_68_P23235081 | chr4:117222839-117222883                          | NM_080469:-238          | Eri3          | PROMOTER               | 1.536                                                        | 1.899                          | 1162.81            | 2208.21            | 2.917                          | 989.53             | 2886.33            |
| A_68_P28576090 | chr12:81620528-81620572                           | NM_001081421:574        | Galnt1        | INSIDE                 | 1.536                                                        | 2.152                          | 4793.87            | 10316.28           | 3.306                          | 3707.25            | 12255.35           |
| A_68_P24112574 | chr5:134790846-134790890                          | NM_001080746:-252       | Gtf2i         | PROMOTER               | 1.536                                                        | 2.895                          | 1190.75            | 3446.85            | 4.446                          | 1021.12            | 4539.79            |
| A_68_P25846166 | chr8:49314139-49314183                            | NM_001145937:445884     | Odz3          | INSIDE                 | 1.536                                                        | 1.963                          | 353.88             | 694.53             | 3.014                          | 297.77             | 897.56             |
| A_68_P26630339 | chr9:72773100-72773144                            | NM_028116:-334          | Pygo1         | PROMOTER               | 1.536                                                        | 1.416                          | 2378.36            | 3368.63            | 2.176                          | 2002.26            | 4356.21            |
| A_68_P28726321 | chr12:109416856-109416900                         | NM_028262:616           | Setd3         | INSIDE                 | 1.536                                                        | 2.422                          | 1209.78            | 2930.42            | 3.721                          | 910.50             | 3388.06            |
| A_68_P23294938 | chr4:128782726-128782770                          | NM_025452:-25           | Tmem54        | PROMOTER               | 1.536                                                        | 4.533                          | 3146.01            | 14260.84           | 6.964                          | 2437.77            | 16975.62           |
| A_68_P33012156 | chr9_random:54584-54628                           | NR_027950:-86           | 4930526115Rik | PROMOTER               | 1.535                                                        | 1.664                          | 567.58             | 944.36             | 2.554                          | 454.38             | 1160.30            |
| A_68_P27103323 | chr10:43723779-43723823                           | NM_172393:852           | Aim1          | INSIDE                 | 1.535                                                        | 1.987                          | 1204.32            | 2393.59            | 3.050                          | 960.45             | 2929.32            |
| A_68_P25637623 | chr8:8661349-8661393                              | NM_010111:-597          | Efnb2         | PROMOTER               | 1.535                                                        | 3.006                          | 909.85             | 2734.56            | 4.615                          | 760.62             | 3509.94            |
| A_68_P32140182 | chr19:45811402-45811446                           | NM_001166361:5950       | Fgf8          | INSIDE                 | 1.535                                                        | 5.312                          | 3067.67            | 16296.33           | 8.155                          | 2340.21            | 19085.57           |
| A_68_P21764750 | chr2:155102799-155102843                          | NM_025735:641           | Map1lc3a      | INSIDE                 | 1.535                                                        | 2.782                          | 4218.66            | 11735.73           | 4.269                          | 3229.90            | 13789.31           |
| A_68_P28950790 | chr13:36827018-36827062                           | NM_153529:-717          | Nrn1          | PROMOTER               | 1.535                                                        | 1.902                          | 4299.20            | 8179.08            | 2.920                          | 3310.23            | 9664.48            |
| A_68_P27280131 | chr10:79440436-79440480                           | NM_001003949:6617       | ORF61         | INSIDE                 | 1.535                                                        | 3.448                          | 2109.25            | 7272.62            | 5.293                          | 1727.17            | 9141.30            |
| A_68_P23972073 | chr5:108890220-108890264                          | NM_172716:-108          | Pegf3         | PROMOTER               | 1.535                                                        | 1.619                          | 1040.16            | 1683.50            | 2.484                          | 873.42             | 2169.90            |
| A_68_P23430798 | chr4:153715842-153715886                          | NM_001177995:295118     | Prdm16        | INSIDE                 | 1.535                                                        | 6.877                          | 4530.81            | 31157.62           | 10.557                         | 3110.63            | 32839.81           |
| A_68_P23801771 | chr5:74591574-74591618                            | NM_026878:246           | Rasl11b       | INSIDE                 | 1.535                                                        | 2.669                          | 1030.92            | 2751.48            | 4.097                          | 893.49             | 3660.55            |
| A_68_P31104792 | chr17:25707704-25707748                           | NM_011447:-95           | Sox8          | DIVERGENT_PROMOTER     | 1.535                                                        | 5.972                          | 1910.27            | 11407.68           | 9.169                          | 1274.07            | 11682.41           |
| A_68_P31207579 | chr17:46692454-46692498                           | NM_020493:635           | Srf           | INSIDE                 | 1.535                                                        | 2.991                          | 2127.40            | 6364.07            | 4.593                          | 1763.88            | 8101.18            |
| A_68_P31921226 | chr19:4125896-4125940                             | NM_001078649:-41        | Tmem134       | DIVERGENT_PROMOTER     | 1.535                                                        | 1.599                          | 2143.89            | 3428.02            | 2.454                          | 1865.14            | 4577.64            |
| A_68_P25951334 | chr8:72877112-72877156                            | NM_001122829:38         | Upf1          | INSIDE                 | 1.535                                                        | 4.103                          | 1615.14            | 6627.05            | 6.300                          | 1315.38            | 8287.26            |
| A_68_P27939271 | chr11:77580034-77580078                           | ENSMUST00000108376:-181 |               | PROMOTER               | 1.535                                                        | 3.753                          | 812.30             | 3048.39            | 5.762                          | 671.76             | 3870.66            |
| A_68_P20250405 | chr1:57029997-57030046                            | NR_024325:1709          | 9130024F11Rik | INSIDE                 | 1.534                                                        | 1.803                          | 368.62             | 664.80             | 2.767                          | 298.59             | 826.23             |
| A_68_P26530603 | chr9:55174506-55174550                            | NM_172923:-227          | A1118078      | PROMOTER               | 1.534                                                        | 3.931                          | 1708.92            | 6717.38            | 6.028                          | 1408.98            | 8493.67            |
| A_68_P30357053 | chr15:77825858-77825902                           | NM_007583:123830        | Caeng2        | INSIDE                 | 1.534                                                        | 3.795                          | 7182.40            | 27260.62           | 5.824                          | 570.61             | 31279.25           |
| A_68_P22715810 | chr4:8617868-8617912                              | NM_001081417:-177       | Chd7          | PROMOTER               | 1.534                                                        | 4.212                          | 492.27             | 2073.62            | 6.460                          | 414.93             | 2680.59            |
| A_68_P23969232 | chr5:108297963-108298007                          | NM_007964:6142          | Evi5          | INSIDE                 | 1.534                                                        | 3.333                          | 2981.35            | 9936.38            | 5.114                          | 2623.33            | 13416.10           |
| A_68_P24038707 | chr5:120886274-120886318                          | NM_008499:4402          | Lhx5          | INSIDE                 | 1.534                                                        | 5.622                          | 734.69             | 4130.74            | 8.623                          | 673.95             | 5811.19            |
| A_68_P21633642 | chr2:130997305-130997349                          | NM_027641:3220          | Spefl         | INSIDE                 | 1.534                                                        | 2.060                          | 1345.19            | 2770.51            | 3.159                          | 1104.99            | 3490.29            |
| A_68_P28615783 | chr12:88728757-88728801                           | NM_011479:402           | Sptlc2        | INSIDE                 | 1.534                                                        | 2.160                          | 1028.58            | 2221.43            | 3.312                          | 828.94             | 2745.68            |
| A_68_P25459064 | chr7:125728226-125728270                          | NM_172476:-48           | Tmc7          | PROMOTER               | 1.534                                                        | 3.283                          | 1856.92            | 6095.49            | 5.036                          | 1642.42            | 8271.82            |
| A_68_P20087498 | chr1:23262935-23262979                            | ENSMUST00000097807:289  |               | INSIDE                 | 1.534                                                        | 1.963                          | 1047.48            | 2056.14            | 3.011                          | 901.14             | 2713.14            |

| ProbeName      | Target position of probe on CpG island microarray | TargetID                | GeneSymbol    | CpG island Description | Ratio of relative methylation (TiO <sub>2</sub> -NP/Vehicle) | Sham group                     |                    |                    | TiO <sub>2</sub> -H group      |                    |                    |
|----------------|---------------------------------------------------|-------------------------|---------------|------------------------|--------------------------------------------------------------|--------------------------------|--------------------|--------------------|--------------------------------|--------------------|--------------------|
|                |                                                   |                         |               |                        |                                                              | Relative methylation (Cy5/Cy3) | Cy3 signal (Input) | Cy5 signal (MeDIP) | Relative methylation (Cy5/Cy3) | Cy3 signal (Input) | Cy5 signal (MeDIP) |
| A_68_P28104781 | chr11:106889949-106889993                         | NM_001163473:434        | 1810010H24Rik | INSIDE                 | 1.533                                                        | 3.836                          | 1002.22            | 3844.42            | 5.880                          | 863.11             | 5074.98            |
| A_68_P25276872 | chr7:89483764-89483808                            | NM_001190374:-417       | Adams13       | PROMOTER               | 1.533                                                        | 7.631                          | 1584.93            | 12094.30           | 11.695                         | 1347.21            | 15755.90           |
| A_68_P28752830 | chr12:114067331-114067375                         | NM_028023:248           | Cdca4         | INSIDE                 | 1.533                                                        | 3.522                          | 2449.67            | 8627.34            | 5.401                          | 1964.09            | 10607.28           |
| A_68_P27921508 | chr11:74433189-74433233                           | NM_001013784:104        | E130309D14Rik | INSIDE                 | 1.533                                                        | 3.394                          | 3585.16            | 12167.32           | 5.202                          | 3056.19            | 15899.69           |
| A_68_P27921510 | chr11:74433466-74433510                           | NM_001013784:382        | E130309D14Rik | INSIDE                 | 1.533                                                        | 8.832                          | 2611.07            | 23060.27           | 13.542                         | 1959.59            | 26536.29           |
| A_68_P28052725 | chr11:97660923-97660967                           | NM_010688:-41           | Laspl         | PROMOTER               | 1.533                                                        | 5.253                          | 3494.89            | 18360.31           | 8.055                          | 2884.12            | 23231.12           |
| A_68_P27937051 | chr11:77161599-77161643                           | NM_177710:131694        | Ssh2          | INSIDE                 | 1.533                                                        | 4.004                          | 1450.50            | 5807.99            | 6.140                          | 1278.99            | 7852.84            |
| A_68_P26530601 | chr9:55174289-55174334                            | NM_172923:-444          | AI118078      | PROMOTER               | 1.532                                                        | 4.214                          | 1874.00            | 7897.77            | 6.456                          | 1473.35            | 9512.37            |
| A_68_P24428428 | chr6:48579466-48579510                            | NR_027236:1323          | AI854703      | INSIDE                 | 1.532                                                        | 2.268                          | 658.89             | 1494.33            | 3.475                          | 601.02             | 2088.42            |
| A_68_P21632194 | chr2:130732229-130732273                          | NM_009730:19            | Atrn          | INSIDE                 | 1.532                                                        | 5.371                          | 1345.00            | 7224.55            | 8.228                          | 1081.03            | 8894.90            |
| A_68_P26019095 | chr8:86794255-86794299                            | NM_026350:-17           | Ccdc130       | PROMOTER               | 1.532                                                        | 2.969                          | 3007.20            | 8927.37            | 4.548                          | 2405.15            | 10938.41           |
| A_68_P31928777 | chr19:5457059-5457103                             | NM_198616:469           | Ccdc85b       | INSIDE                 | 1.532                                                        | 2.179                          | 1183.56            | 2579.21            | 3.338                          | 1028.36            | 3432.85            |
| A_68_P22355191 | chr3:97414110-97414154                            | NM_026539:-19           | Chd11         | PROMOTER               | 1.532                                                        | 4.639                          | 481.16             | 2232.03            | 7.109                          | 455.84             | 3240.45            |
| A_68_P31258211 | chr17:56901482-56901526                           | NM_144858:-2669         | Dus3l         | DIVERGENT_PROMOTER     | 1.532                                                        | 1.538                          | 1244.70            | 1913.87            | 2.355                          | 1027.37            | 2419.82            |
| A_68_P20644035 | chr1:138028029-138028073                          | NM_001039472:73         | Kif21b        | INSIDE                 | 1.532                                                        | 1.639                          | 677.67             | 1110.85            | 2.512                          | 547.07             | 1374.03            |
| A_68_P26345157 | chr9:20837581-20837625                            | NR_035438:-830          | Mir1900       | PROMOTER               | 1.532                                                        | 2.271                          | 1080.63            | 2454.17            | 3.479                          | 904.14             | 3145.28            |
| A_68_P26873355 | chr9:119487746-119487790                          | NM_021544:366           | Scn5a         | INSIDE                 | 1.532                                                        | 1.767                          | 1439.43            | 2543.43            | 2.708                          | 1209.86            | 3275.78            |
| A_68_P27325555 | chr10:87922666-87922710                           | NM_011517:357           | Syep3         | INSIDE                 | 1.532                                                        | 7.924                          | 5644.23            | 44726.54           | 12.140                         | 3909.36            | 47458.33           |
| A_68_P24591236 | chr6:83018754-83018798                            | NM_009392:1443          | Tlx2          | INSIDE                 | 1.532                                                        | 2.775                          | 421.84             | 1170.68            | 4.251                          | 650.07             | 2763.26            |
| A_68_P25504790 | chr7:134397531-134397575                          | NM_177362:9513          | Zfp771        | INSIDE                 | 1.532                                                        | 1.867                          | 1286.01            | 2400.51            | 2.860                          | 1137.32            | 3252.78            |
| A_68_P23880196 | chr5:90312755-90312799                            | NM_001081401:-417       | Adams3        | PROMOTER               | 1.531                                                        | 3.069                          | 1012.76            | 3108.29            | 4.698                          | 777.44             | 3652.78            |
| A_68_P26469460 | chr9:44575399-44575447                            | NM_145985:469           | Arcn1         | INSIDE                 | 1.531                                                        | 7.501                          | 660.54             | 4954.98            | 11.486                         | 401.09             | 4606.84            |
| A_68_P28727039 | chr12:109513784-109513828                         | NM_001159910:-179       | Ccdc85c       | PROMOTER               | 1.531                                                        | 3.067                          | 3029.72            | 9291.40            | 4.694                          | 2394.92            | 11242.71           |
| A_68_P23573354 | chr5:30890939-30890983                            | NM_010608:418           | Kenk3         | INSIDE                 | 1.531                                                        | 6.699                          | 1037.65            | 6951.16            | 10.254                         | 713.64             | 7317.35            |
| A_68_P26537272 | chr9:56468941-56468985                            | NM_181074:64098         | Lingo1        | INSIDE                 | 1.531                                                        | 4.659                          | 605.59             | 2821.38            | 7.135                          | 486.37             | 3470.21            |
| A_68_P27354860 | chr10:93103568-93103612                           | NM_021320:-203          | Ntn4          | PROMOTER               | 1.531                                                        | 1.740                          | 1786.47            | 3107.84            | 2.664                          | 1503.59            | 4005.25            |
| A_68_P28738217 | chr12:111684829-111684873                         | NM_001135001:-538       | Ppp2r5c       | PROMOTER               | 1.531                                                        | 2.468                          | 2455.41            | 6061.07            | 3.780                          | 1822.54            | 6888.58            |
| A_68_P22944675 | chr4:57313204-57313248                            | NM_011207:1483          | Ptpn3         | INSIDE                 | 1.531                                                        | 4.074                          | 349.23             | 1422.69            | 6.235                          | 481.41             | 3001.86            |
| A_68_P27798065 | chr11:52045603-52045647                           | NM_011543:128           | Skp1a         | INSIDE                 | 1.531                                                        | 2.037                          | 756.45             | 1540.63            | 3.117                          | 659.84             | 2056.86            |
| A_68_P30363492 | chr15:78798174-78798218                           | NM_001039155:20043      | Triobp        | INSIDE                 | 1.531                                                        | 4.304                          | 3043.35            | 13098.90           | 6.588                          | 2143.46            | 14121.76           |
| A_68_P25670559 | chr8:13786249-13786293                            | NM_025924:656           | Upf3a         | INSIDE                 | 1.531                                                        | 1.530                          | 2669.49            | 4083.41            | 2.342                          | 2133.74            | 4998.14            |
| A_68_P22394252 | chr3:104770874-104770918                          | NM_009520:-6269         | Wnt2b         | PROMOTER               | 1.531                                                        | 2.252                          | 1357.05            | 3055.94            | 3.448                          | 1114.67            | 3843.22            |
| A_68_P24086494 | A_68_P24086494                                    |                         |               | Unknown                | 1.531                                                        | 2.899                          | 569.27             | 1650.39            | 4.439                          | 505.79             | 2244.97            |
| A_68_P25352334 | chr7:104936888-104936932                          | ENSMUST00000172423:-140 |               | PROMOTER               | 1.531                                                        | 1.373                          | 1404.07            | 1927.65            | 2.103                          | 1176.25            | 2473.09            |
| A_68_P31679073 | chr18:47009821-47009865                           | NM_029008:150           | 4833403115Rik | INSIDE                 | 1.530                                                        | 1.493                          | 1261.63            | 1883.79            | 2.284                          | 1016.66            | 2322.55            |
| A_68_P23961301 | chr5:10688112-106881156                           | NM_001005477:6051       | Barhl2        | DOWNSTREAM             | 1.530                                                        | 4.458                          | 1187.26            | 5292.41            | 6.821                          | 1025.21            | 6992.74            |
| A_68_P32395905 | chrX:53709083-53709127                            | NM_172779:1089          | Ddx26b        | INSIDE                 | 1.530                                                        | 1.452                          | 5384.84            | 7816.63            | 2.221                          | 2264.74            | 5029.57            |
| A_68_P20863428 | chr1:180267506-180267550                          | NM_016805:387           | Hnrnpu        | INSIDE                 | 1.530                                                        | 1.492                          | 616.38             | 919.53             | 2.283                          | 550.33             | 1256.38            |
| A_68_P25144266 | chr7:63217700-63217744                            | NM_023647:98            | Nipa2         | INSIDE                 | 1.530                                                        | 1.692                          | 1197.66            | 2026.59            | 2.589                          | 1035.15            | 2680.06            |
| A_68_P20259227 | chr1:58561519-58561563                            | NM_001025378:-3280      | Orc2          | PROMOTER               | 1.530                                                        | 2.177                          | 586.53             | 1276.70            | 3.330                          | 452.39             | 1506.25            |
| A_68_P22886521 | chr4:46051942-46051986                            | NM_021883:-129          | Tmod1         | PROMOTER               | 1.530                                                        | 2.741                          | 2565.11            | 7031.71            | 4.195                          | 2101.39            | 8815.76            |
| A_68_P29308210 | chr13:108681440-108681484                         | NM_145456:-1204         | Zswim6        | PROMOTER               | 1.530                                                        | 3.652                          | 1260.57            | 4603.49            | 5.589                          | 1054.22            | 5891.68            |
| A_68_P24086560 | A_68_P24086560                                    |                         |               | Unknown                | 1.530                                                        | 4.553                          | 524.04             | 2385.92            | 6.964                          | 363.09             | 2528.68            |
| A_68_P25021007 | chr7:29079751-29079795                            | NM_007866:7032          | Dll3          | INSIDE                 | 1.529                                                        | 4.149                          | 1259.27            | 5225.23            | 6.346                          | 1111.25            | 7052.15            |
| A_68_P27253669 | chr10:74430095-74430139                           | NM_010311:141           | Gnaz          | INSIDE                 | 1.529                                                        | 2.357                          | 789.78             | 1861.25            | 3.603                          | 726.43             | 2617.05            |
| A_68_P26812405 | chr9:107905152-107905196                          | NM_013785:196           | Ip6k1         | INSIDE                 | 1.529                                                        | 3.185                          | 897.89             | 2859.76            | 4.869                          | 759.91             | 3700.20            |
| A_68_P30478815 | chr15:99054306-99054350                           | NM_010601:-1078         | Kenh3         | PROMOTER               | 1.529                                                        | 2.143                          | 1207.57            | 2587.92            | 3.278                          | 1052.83            | 3450.90            |
| A_68_P28583196 | chr12:82961089-82961133                           | NM_018814:94            | Penx          | INSIDE                 | 1.529                                                        | 2.203                          | 1583.96            | 3489.16            | 3.368                          | 1330.25            | 4480.48            |
| A_68_P21098343 | chr2:29475430-29475474                            | NM_001039086:213        | Rapgef1       | INSIDE                 | 1.529                                                        | 1.667                          | 532.10             | 886.98             | 2.548                          | 499.46             | 1272.59            |
| A_68_P23749454 | chr5:64551417-64551461                            | NM_019636:-11           | Tbc1d1        | PROMOTER               | 1.529                                                        | 1.732                          | 1641.37            | 2843.35            | 2.650                          | 1396.68            | 3700.54            |
| A_68_P26713768 | chr9:89599588-89599632                            | NM_025360:271           | Tmed3         | INSIDE                 | 1.529                                                        | 1.959                          | 612.80             | 1200.66            | 2.995                          | 523.72             | 1568.54            |

| ProbeName      | Target position of probe on CpG island microarray | TargetID                | GeneSymbol    | CpG island Description | Ratio of relative methylation (TiO <sub>2</sub> -NP/Vehicle) | Sham group                     |                    |                    | TiO <sub>2</sub> -H group      |                    |                    |
|----------------|---------------------------------------------------|-------------------------|---------------|------------------------|--------------------------------------------------------------|--------------------------------|--------------------|--------------------|--------------------------------|--------------------|--------------------|
|                |                                                   |                         |               |                        |                                                              | Relative methylation (Cy5/Cy3) | Cy3 signal (Input) | Cy5 signal (MeDIP) | Relative methylation (Cy5/Cy3) | Cy3 signal (Input) | Cy5 signal (MeDIP) |
| A_68_P29286853 | chr13:104564644-104564688                         | ENSMUST00000109322:-127 |               | PROMOTER               | 1.529                                                        | 2.288                          | 823.90             | 1884.69            | 3.498                          | 732.31             | 2561.91            |
| A_68_P21809324 | chr2:162734117-162734161                          | ENSMUST00000122376:479  |               | INSIDE                 | 1.529                                                        | 4.797                          | 1120.76            | 5376.75            | 7.337                          | 932.71             | 6843.66            |
| A_68_P23562830 | chr5:28784867-28784911                            | NR_015562:-8635         | 9530036011Rik | PROMOTER               | 1.528                                                        | 3.034                          | 425.37             | 1290.71            | 4.636                          | 458.45             | 2125.45            |
| A_68_P31150132 | chr17:33822462-33822506                           | NM_001109913:-81        | Hnmpm         | PROMOTER               | 1.528                                                        | 3.972                          | 1968.27            | 7818.47            | 6.071                          | 1520.49            | 9230.34            |
| A_68_P20788410 | chr1:166237694-166237738                          | NM_178071:-89           | Nme7          | DIVERGENT_PROMOTER     | 1.528                                                        | 3.811                          | 729.52             | 2780.46            | 5.824                          | 566.98             | 3302.24            |
| A_68_P23176709 | chr4:104782027-104782071                          | NM_178143:455           | Prkaa2        | INSIDE                 | 1.528                                                        | 1.581                          | 4004.06            | 6331.55            | 2.416                          | 3082.03            | 7445.24            |
| A_68_P23223131 | chr4:114729380-114729424                          | NM_011527:-2729         | Tal1          | PROMOTER               | 1.528                                                        | 1.748                          | 4063.28            | 7104.22            | 2.671                          | 3092.87            | 8261.82            |
| A_68_P20936016 | chr1:192886793-192886837                          | NM_001163421:-3         | Tatdn3        | DIVERGENT_PROMOTER     | 1.528                                                        | 2.584                          | 13552.33           | 35014.66           | 3.948                          | 11020.49           | 43506.03           |
| A_68_P21121774 | chr2:33232833-33232877                            | NM_001025594:198        | Zbtb43        | INSIDE                 | 1.528                                                        | 2.141                          | 1900.30            | 4068.74            | 3.271                          | 1754.03            | 5738.29            |
| A_68_P32288518 | chrX:20002618-20002662                            | ENSMUST00000115384:-173 |               | PROMOTER               | 1.528                                                        | 3.462                          | 1052.72            | 3644.25            | 5.289                          | 598.35             | 3164.43            |
| A_68_P25597935 | chr7:150155005-150155050                          | NM_008554:142           | Asc12         | INSIDE                 | 1.527                                                        | 1.424                          | 1230.80            | 1753.04            | 2.175                          | 972.17             | 2114.90            |
| A_68_P26317084 | chr9:14185441-14185485                            | NM_028013:224           | Endod1        | INSIDE                 | 1.527                                                        | 1.671                          | 826.93             | 1381.89            | 2.551                          | 778.11             | 1985.00            |
| A_68_P28158070 | chr11:116083313-116083358                         | NM_025276:16070         | Evpl          | INSIDE                 | 1.527                                                        | 6.358                          | 2493.61            | 15855.54           | 9.710                          | 1964.19            | 19072.41           |
| A_68_P31371532 | chr17:78817452-78817496                           | NM_199448:-31           | Fez2          | PROMOTER               | 1.527                                                        | 5.391                          | 8891.70            | 47938.00           | 8.235                          | 6744.37            | 55539.39           |
| A_68_P24951566 | chr7:4966239-4966283                              | NM_011813:-405          | Fiz1          | PROMOTER               | 1.527                                                        | 1.489                          | 2233.90            | 3326.98            | 2.274                          | 1677.08            | 3813.57            |
| A_68_P20553865 | chr1:120734246-120734290                          | NM_001081125:215928     | Gli2          | INSIDE                 | 1.527                                                        | 2.576                          | 834.66             | 2150.49            | 3.933                          | 708.23             | 2785.64            |
| A_68_P28067969 | chr11:100275377-100275421                         | NM_176830:735           | Leprel4       | INSIDE                 | 1.527                                                        | 2.451                          | 999.41             | 2449.55            | 3.742                          | 782.26             | 2927.01            |
| A_68_P25962045 | chr8:75071657-75071701                            | NM_027485:531           | Med26         | INSIDE                 | 1.527                                                        | 2.995                          | 3341.21            | 10006.22           | 4.572                          | 2633.69            | 12040.27           |
| A_68_P31425843 | chr17:88374364-88374408                           | NM_010830:-3            | Msh6          | PROMOTER               | 1.527                                                        | 1.680                          | 584.04             | 981.29             | 2.566                          | 572.71             | 1469.51            |
| A_68_P22540268 | chr3:132612964-132613008                          | NM_001029836:269        | Npnt          | INSIDE                 | 1.527                                                        | 2.202                          | 1452.72            | 3198.70            | 3.362                          | 1305.20            | 4387.93            |
| A_68_P22825736 | chr4:33296596-33296640                            | NM_177774:653           | Srsf12        | INSIDE                 | 1.527                                                        | 3.172                          | 5337.83            | 16931.31           | 4.845                          | 3663.72            | 17751.12           |
| A_68_P23749879 | chr5:64621748-64621793                            | NM_019636:70321         | Tbc1d1        | INSIDE                 | 1.527                                                        | 3.790                          | 7787.71            | 29513.45           | 5.786                          | 6371.74            | 36869.30           |
| A_68_P28053990 | chr11:97883852-97883896                           | NM_001159320:-4188      | Caenb1        | PROMOTER               | 1.526                                                        | 1.645                          | 2003.46            | 3296.48            | 2.511                          | 1678.37            | 4215.21            |
| A_68_P29651385 | chr14:62300358-62300402                           | NR_028264:830           | Dleu2         | INSIDE                 | 1.526                                                        | 3.449                          | 4014.63            | 13847.19           | 5.263                          | 3245.48            | 17082.07           |
| A_68_P20826000 | chr1:172995096-172995140                          | NM_010188:-5584         | Fcgr3         | PROMOTER               | 1.526                                                        | 2.291                          | 17110.18           | 39195.13           | 3.495                          | 12593.44           | 44016.75           |
| A_68_P21258086 | chr2:60221286-60221330                            | NM_013825:-20           | Ly75          | PROMOTER               | 1.526                                                        | 2.902                          | 3297.93            | 9570.93            | 4.427                          | 2671.37            | 11827.18           |
| A_68_P22752523 | chr4:15885168-15885212                            | NM_013752:77            | Nbn           | INSIDE                 | 1.526                                                        | 2.495                          | 486.75             | 1214.43            | 3.808                          | 417.33             | 1589.30            |
| A_68_P26021284 | chr8:87230641-87230685                            | NM_001081981:67606      | Nfix          | DOWNSTREAM             | 1.526                                                        | 5.117                          | 5399.70            | 27630.41           | 7.807                          | 4219.66            | 32941.71           |
| A_68_P30961954 | chr16:91271188-91271232                           | NM_016968:1197          | Olig1         | INSIDE                 | 1.526                                                        | 1.925                          | 2176.75            | 4190.72            | 2.937                          | 1710.79            | 5024.60            |
| A_68_P26477292 | chr9:45821526-45821572                            | NM_027498:646           | Sik3          | INSIDE                 | 1.526                                                        | 3.393                          | 1087.02            | 3688.45            | 5.178                          | 884.56             | 4579.83            |
| A_68_P29062337 | chr13:56710941-56710985                           | NM_009369:-1            | Tgfb1         | PROMOTER               | 1.526                                                        | 3.737                          | 5366.24            | 20054.80           | 5.704                          | 4386.93            | 25022.32           |
| A_68_P24136157 | chr5:140020297-140020341                          | NM_013702:467           | Unex          | INSIDE                 | 1.526                                                        | 3.136                          | 2512.84            | 7880.53            | 4.786                          | 2233.60            | 10689.77           |
| A_68_P32410980 | chrX:56820824-56820868                            | ENSMUST00000124402:-197 |               | PROMOTER               | 1.526                                                        | 2.019                          | 554.33             | 1119.11            | 3.080                          | 325.16             | 1001.56            |
| A_68_P24189032 | chr5:150921298-150921342                          | ENSMUST00000165030:79   |               | INSIDE                 | 1.526                                                        | 1.614                          | 1184.67            | 1911.70            | 2.462                          | 1095.03            | 2696.21            |
| A_68_P23339473 | chr4:136913085-136913129                          | NM_009861:546           | Cdc42         | INSIDE                 | 1.525                                                        | 1.562                          | 644.29             | 1006.07            | 2.381                          | 953.81             | 2270.72            |
| A_68_P30378507 | chr15:81416859-81416903                           | NM_177821:237           | Ep300         | INSIDE                 | 1.525                                                        | 1.529                          | 2839.79            | 4341.31            | 2.331                          | 2245.83            | 5234.89            |
| A_68_P30364007 | chr15:78873556-78873600                           | NM_015738:1264          | Gair3         | INSIDE                 | 1.525                                                        | 1.580                          | 1550.00            | 2449.54            | 2.410                          | 1295.18            | 3121.49            |
| A_68_P21270819 | chr2:62502267-62502311                            | NM_145523:-95           | Gca           | PROMOTER               | 1.525                                                        | 1.673                          | 2277.55            | 3809.24            | 2.551                          | 1855.99            | 4734.25            |
| A_68_P23927386 | chr5:100468112-100468156                          | NM_016690:107           | Hnrpd1        | INSIDE                 | 1.525                                                        | 1.347                          | 2453.41            | 3303.61            | 2.053                          | 2090.79            | 4292.30            |
| A_68_P21078500 | chr2:26264786-26264830                            | NM_033134:-100          | Inpp5c        | PROMOTER               | 1.525                                                        | 2.628                          | 4230.13            | 11117.76           | 4.007                          | 3630.11            | 14546.65           |
| A_68_P30980968 | chr16:94592282-94592326                           | NM_001159618:-147       | Pigg          | PROMOTER               | 1.525                                                        | 3.774                          | 2425.87            | 9154.33            | 5.756                          | 2179.99            | 12547.77           |
| A_68_P20638994 | chr1:137271658-137271702                          | NM_175259:-40           | Shisa4        | PROMOTER               | 1.525                                                        | 1.713                          | 767.81             | 1315.14            | 2.612                          | 633.58             | 1654.92            |
| A_68_P23294939 | chr4:128782828-128782872                          | NM_025452:77            | Tmem54        | INSIDE                 | 1.525                                                        | 2.730                          | 3022.03            | 8250.80            | 4.163                          | 2406.60            | 10019.09           |
| A_68_P32700067 | chrX:137134400-137134444                          | NM_001077364:639        | Tsc22d3       | INSIDE                 | 1.525                                                        | 2.951                          | 4716.72            | 13920.73           | 4.500                          | 2959.65            | 13317.83           |
| A_68_P21770588 | chr2:156137716-156137760                          | NM_027585:-470          | 4921517L17Rik | PROMOTER               | 1.524                                                        | 2.899                          | 1622.43            | 4703.88            | 4.418                          | 1472.90            | 6507.65            |
| A_68_P30588038 | chr16:20531403-20531447                           | NM_007889:14288         | Dvl3          | INSIDE                 | 1.524                                                        | 3.268                          | 6445.03            | 21060.16           | 4.980                          | 4893.53            | 24368.66           |
| A_68_P31937111 | chr19:7054987-7055031                             | NM_001166368:-57        | Fkbp2         | PROMOTER               | 1.524                                                        | 1.910                          | 1073.69            | 2050.39            | 2.910                          | 831.21             | 2418.70            |
| A_68_P26644020 | chr9:75289818-75289862                            | NM_001039522:510        | Leo1          | INSIDE                 | 1.524                                                        | 2.105                          | 470.35             | 990.02             | 3.207                          | 362.79             | 1163.57            |
| A_68_P30571313 | chr16:16983889-16983933                           | NM_001038663:436        | Mapk1         | INSIDE                 | 1.524                                                        | 2.580                          | 3619.05            | 9335.38            | 3.932                          | 2928.64            | 11514.79           |
| A_68_P31640485 | chr18:39650185-39650229                           | NM_008173:-3307         | Nr3c1         | PROMOTER               | 1.524                                                        | 2.039                          | 5516.93            | 11249.55           | 3.107                          | 4451.15            | 13830.80           |
| A_68_P31302584 | chr17:66121929-66121973                           | NM_133685:142           | Rab31         | INSIDE                 | 1.524                                                        | 5.368                          | 2447.72            | 13138.28           | 8.182                          | 2211.95            | 18098.76           |

| ProbeName      | Target position of probe on CpG island microarray | TargetID               | GeneSymbol    | CpG island Description | Ratio of relative methylation (TiO <sub>2</sub> -NP/Vehicle) | Sham group                     |                    |                    | TiO <sub>2</sub> -H group      |                    |                    |
|----------------|---------------------------------------------------|------------------------|---------------|------------------------|--------------------------------------------------------------|--------------------------------|--------------------|--------------------|--------------------------------|--------------------|--------------------|
|                |                                                   |                        |               |                        |                                                              | Relative methylation (Cy5/Cy3) | Cy3 signal (Input) | Cy5 signal (MeDIP) | Relative methylation (Cy5/Cy3) | Cy3 signal (Input) | Cy5 signal (MeDIP) |
| A_68_P31120939 | chr17:28314640-28314684                           | NM_172617:300          | Zfp523        | INSIDE                 | 1.524                                                        | 2.620                          | 5376.46            | 14087.07           | 3.993                          | 3975.25            | 15871.32           |
| A_68_P31090923 | chr17:23013560-23013604                           | NM_001110254:-9481     | Zfp945        | PROMOTER               | 1.524                                                        | 3.867                          | 1295.52            | 5010.37            | 5.892                          | 1139.64            | 6715.07            |
| A_68_P30591825 | chr16:2133336-21333380                            | AK018285:71            |               | INSIDE                 | 1.524                                                        | 1.848                          | 1711.65            | 3162.98            | 2.817                          | 1599.45            | 4505.55            |
| A_68_P31127961 | chr17:29574415-29574459                           | AK153778:-2035         |               | PROMOTER               | 1.524                                                        | 2.268                          | 647.74             | 1469.09            | 3.456                          | 595.62             | 2058.33            |
| A_68_P23264561 | chr4:123427058-123427102                          | NM_023423:462          | Akirin1       | INSIDE                 | 1.523                                                        | 1.873                          | 844.93             | 1582.79            | 2.854                          | 666.74             | 1902.56            |
| A_68_P20258850 | chr1:58480309-58480353                            | NM_001042634:602       | Clk1          | INSIDE                 | 1.523                                                        | 1.658                          | 1405.07            | 2330.06            | 2.526                          | 1048.58            | 2648.61            |
| A_68_P30743456 | chr16:48994162-48994206                           | NM_001110017:41        | Dzip3         | INSIDE                 | 1.523                                                        | 3.027                          | 2735.09            | 8279.27            | 4.610                          | 2240.86            | 10331.14           |
| A_68_P23280028 | chr4:126106770-126106814                          | NM_153402:-6           | Eif2c3        | PROMOTER               | 1.523                                                        | 3.112                          | 1596.04            | 4967.57            | 4.742                          | 1337.85            | 6343.42            |
| A_68_P26891190 | chr9:122656383-122656427                          | NM_001199736:-59       | Gm9524        | PROMOTER               | 1.523                                                        | 7.913                          | 889.69             | 7039.99            | 12.054                         | 658.89             | 7942.60            |
| A_68_P29330804 | chr13:112598387-112598431                         | NM_011945:783          | Map3k1        | INSIDE                 | 1.523                                                        | 2.477                          | 2532.55            | 6272.51            | 3.773                          | 2203.81            | 8314.87            |
| A_68_P31668416 | chr18:44821733-44821777                           | NM_001085374:166       | Mcc           | INSIDE                 | 1.523                                                        | 3.694                          | 1617.21            | 5974.76            | 5.627                          | 1172.44            | 6597.50            |
| A_68_P26026035 | chr8:88224110-88224154                            | NM_001081324:-9224     | Neto2         | PROMOTER               | 1.523                                                        | 1.881                          | 423.11             | 795.66             | 2.864                          | 418.85             | 1199.59            |
| A_68_P25144564 | chr7:63274831-63274875                            | NM_153578:91           | Nipa1         | INSIDE                 | 1.523                                                        | 5.769                          | 4245.98            | 24493.11           | 8.786                          | 3181.43            | 27952.98           |
| A_68_P25524905 | chr7:138009499-138009543                          | NM_133942:97           | Plekha1       | INSIDE                 | 1.523                                                        | 3.165                          | 4756.44            | 15053.68           | 4.820                          | 3968.99            | 19129.86           |
| A_68_P27974634 | chr11:83777899-83777943                           | NM_001115009:-9        | Syngn         | PROMOTER               | 1.523                                                        | 2.208                          | 376.20             | 830.79             | 3.364                          | 416.91             | 1402.61            |
| A_68_P23381898 | chr4:144784634-144784678                          | NM_001128198:-4161     | Vps13d        | PROMOTER               | 1.523                                                        | 2.268                          | 1021.53            | 2316.37            | 3.453                          | 893.16             | 3083.71            |
| A_68_P31335313 | chr17:71965569-71965613                           | NM_175639:36           | Wdr43         | INSIDE                 | 1.523                                                        | 1.559                          | 551.97             | 860.51             | 2.374                          | 500.10             | 1187.19            |
| A_68_P26038355 | chr8:90482696-90482740                            | NM_033327:776          | Zfp423        | INSIDE                 | 1.523                                                        | 2.485                          | 1179.34            | 2930.14            | 3.784                          | 1066.12            | 4034.58            |
| A_68_P32573868 | chrX:100812194-100812238                          | NR_028381:6877         | B230206F22Rik | INSIDE                 | 1.522                                                        | 1.930                          | 590.26             | 1139.31            | 2.937                          | 464.53             | 1364.45            |
| A_68_P28109104 | chr11:107655957-107656001                         | NM_019431:-200         | Caecng4       | PROMOTER               | 1.522                                                        | 5.935                          | 2073.53            | 12305.65           | 9.033                          | 1748.37            | 15792.28           |
| A_68_P24791602 | chr6:119125266-119125312                          | NM_001033379:18        | Dep1b         | INSIDE                 | 1.522                                                        | 6.481                          | 3512.61            | 22766.90           | 9.865                          | 2669.19            | 26332.06           |
| A_68_P27997247 | chr11:87800951-87800995                           | NM_001168472:-885      | Dynll2        | PROMOTER               | 1.522                                                        | 2.430                          | 1692.09            | 4111.94            | 3.698                          | 1379.73            | 5101.95            |
| A_68_P27827804 | chr11:57650530-57650574                           | NM_008213:-4903        | Hand1         | PROMOTER               | 1.522                                                        | 2.081                          | 2280.25            | 4744.95            | 3.166                          | 1619.94            | 5128.94            |
| A_68_P26648623 | chr9:76171335-76171379                            | NM_198962:29           | Hertz2        | INSIDE                 | 1.522                                                        | 2.097                          | 1253.70            | 2629.01            | 3.192                          | 1031.47            | 3292.40            |
| A_68_P25953853 | chr8:73284695-73284739                            | NM_183170:104          | Mpv17l2       | INSIDE                 | 1.522                                                        | 3.011                          | 1073.38            | 3231.59            | 4.583                          | 912.14             | 4180.48            |
| A_68_P29162295 | chr13:78338732-78338776                           | NM_010151:-511         | Nr2f1         | PROMOTER               | 1.522                                                        | 2.715                          | 1410.20            | 3828.32            | 4.131                          | 1237.84            | 5113.65            |
| A_68_P23415887 | chr4:151369933-151369977                          | NM_172705:334          | Phf13         | INSIDE                 | 1.522                                                        | 2.338                          | 8895.10            | 20795.78           | 3.559                          | 7091.16            | 25238.78           |
| A_68_P21091625 | chr2:28389284-28389328                            | NM_001145835:323       | Ralgds        | INSIDE                 | 1.522                                                        | 1.960                          | 879.08             | 1722.93            | 2.982                          | 703.10             | 2096.69            |
| A_68_P21747609 | chr2:151919690-151919734                          | NM_001160410:12448     | Serf2         | INSIDE                 | 1.522                                                        | 7.979                          | 1606.17            | 12814.85           | 12.144                         | 1057.18            | 12838.79           |
| A_68_P29507580 | chr14:31529106-31529150                           | NM_001166532:328       | Sfmbt1        | INSIDE                 | 1.522                                                        | 4.440                          | 1023.75            | 4545.37            | 6.758                          | 860.17             | 5813.21            |
| A_68_P23594804 | chr5:34868325-34868369                            | NM_011893:-86          | Sh3bp2        | PROMOTER               | 1.522                                                        | 3.182                          | 1059.93            | 3372.88            | 4.843                          | 1020.92            | 4944.01            |
| A_68_P21840492 | chr2:168106455-168106499                          | ENSMUST00000109191:156 |               | INSIDE                 | 1.522                                                        | 3.036                          | 1075.46            | 3265.51            | 4.621                          | 990.43             | 4576.44            |
| A_68_P27942253 | chr11:78075063-78075107                           | NM_001002004:-171      | 2610507B11Rik | PROMOTER               | 1.521                                                        | 5.560                          | 2221.97            | 12353.43           | 8.457                          | 2054.15            | 17372.83           |
| A_68_P26741563 | chr9:95306199-95306243                            | NM_018763:1469         | Chst2         | INSIDE                 | 1.521                                                        | 1.952                          | 1403.78            | 2740.04            | 2.970                          | 1182.30            | 3511.08            |
| A_68_P22968875 | chr4:62875286-62875330                            | NM_025685:-1137        | Col27a1       | PROMOTER               | 1.521                                                        | 1.878                          | 674.44             | 1266.91            | 2.857                          | 542.61             | 1550.01            |
| A_68_P30555522 | chr16:13110157-13110201                           | NM_015769:350          | Erec4         | INSIDE                 | 1.521                                                        | 2.963                          | 2035.68            | 6031.25            | 4.507                          | 1728.16            | 7789.45            |
| A_68_P25528898 | chr7:138685827-138685871                          | NM_008257:-628         | Hmx3          | PROMOTER               | 1.521                                                        | 3.334                          | 310.68             | 1035.88            | 5.071                          | 297.74             | 1509.99            |
| A_68_P29048046 | chr13:54287380-54287425                           | NM_008286:-95          | Hrh2          | PROMOTER               | 1.521                                                        | 2.939                          | 1503.11            | 4418.07            | 4.470                          | 943.46             | 4217.09            |
| A_68_P25837693 | chr8:47826718-47826762                            | NM_008391:1642         | Irf2          | INSIDE                 | 1.521                                                        | 3.072                          | 367.43             | 1128.61            | 4.671                          | 336.01             | 1569.53            |
| A_68_P27512349 | chr10:122513403-122513447                         | NM_001163024:137       | Mon2          | INSIDE                 | 1.521                                                        | 3.284                          | 2131.92            | 7000.31            | 4.995                          | 1977.70            | 9878.64            |
| A_68_P22616951 | chr3:146475944-146475988                          | NM_011100:-56          | Prkab         | PROMOTER               | 1.521                                                        | 2.762                          | 2101.38            | 5803.43            | 4.202                          | 1851.47            | 7779.21            |
| A_68_P26138372 | chr8:108734689-108734733                          | NM_001007567:123       | Slc7a6os      | INSIDE                 | 1.521                                                        | 2.938                          | 1210.21            | 3555.44            | 4.469                          | 1091.81            | 4879.33            |
| A_68_P30255510 | chr15:59479785-59479829                           | NM_144549:-402         | Trib1         | PROMOTER               | 1.521                                                        | 2.815                          | 1344.26            | 3784.38            | 4.282                          | 1178.22            | 5044.74            |
| A_68_P28185441 | chr11:120442461-120442505                         | NM_133796:452          | Arhgdia       | INSIDE                 | 1.520                                                        | 1.757                          | 2949.75            | 5183.66            | 2.671                          | 2275.76            | 6078.96            |
| A_68_P22288626 | chr3:83844024-83844068                            | NM_172681:37           | D930015E06Rik | INSIDE                 | 1.520                                                        | 3.459                          | 496.73             | 1718.18            | 5.259                          | 409.31             | 2152.57            |
| A_68_P21819501 | chr2:164571271-164571315                          | NM_133763:-222         | Dnttip1       | DIVERGENT_PROMOTER     | 1.520                                                        | 2.327                          | 7413.05            | 17246.82           | 3.535                          | 5386.08            | 19041.21           |
| A_68_P21556816 | chr2:117075560-117075604                          | NM_026620:108          | Fam98b        | INSIDE                 | 1.520                                                        | 2.828                          | 1580.47            | 4470.05            | 4.299                          | 1399.84            | 6017.61            |
| A_68_P25261383 | chr7:86640870-86640922                            | NR_029818:-9253        | Mir9-3        | PROMOTER               | 1.520                                                        | 4.997                          | 818.01             | 4087.90            | 7.595                          | 655.17             | 4976.12            |
| A_68_P29228002 | chr13:93962021-93962065                           | NM_133905:196          | Papd4         | INSIDE                 | 1.520                                                        | 4.177                          | 1394.45            | 5824.97            | 6.349                          | 1073.14            | 6813.49            |
| A_68_P27898394 | chr11:69810400-69810444                           | NM_030064:1150         | Phf23         | INSIDE                 | 1.520                                                        | 2.800                          | 6398.65            | 17918.06           | 4.255                          | 4222.08            | 17965.36           |
| A_68_P26135404 | chr8:108218075-108218119                          | NM_001033320:3291      | Rltpr         | INSIDE                 | 1.520                                                        | 1.873                          | 10467.60           | 19607.79           | 2.848                          | 8262.30            | 23530.51           |

| ProbeName      | Target position of probe on CpG island microarray | TargetID                | GeneSymbol    | CpG island Description | Ratio of relative methylation (TiO <sub>2</sub> -NP/Vehicle) | Sham group                     |                    |                    | TiO <sub>2</sub> -H group      |                    |                    |
|----------------|---------------------------------------------------|-------------------------|---------------|------------------------|--------------------------------------------------------------|--------------------------------|--------------------|--------------------|--------------------------------|--------------------|--------------------|
|                |                                                   |                         |               |                        |                                                              | Relative methylation (Cy5/Cy3) | Cy3 signal (Input) | Cy5 signal (MeDIP) | Relative methylation (Cy5/Cy3) | Cy3 signal (Input) | Cy5 signal (MeDIP) |
| A_68_P28938196 | chr13:34436655-34436699                           | NM_001033167:375        | Slc22a23      | INSIDE                 | 1.520                                                        | 1.966                          | 319.47             | 628.20             | 2.988                          | 317.30             | 948.12             |
| A_68_P23416421 | chr4:151460684-151460728                          | ENSMUST00000118648:-260 |               | PROMOTER               | 1.520                                                        | 7.398                          | 551.53             | 4080.29            | 11.246                         | 515.12             | 5792.83            |
| A_68_P23345840 | chr4:138010011-138010055                          | NM_025451:-1030         | Camk2n1       | PROMOTER               | 1.519                                                        | 2.325                          | 1032.72            | 2401.05            | 3.531                          | 867.53             | 3063.29            |
| A_68_P26127993 | chr8:106865035-106865079                          | NM_024217:563           | Cntm3         | INSIDE                 | 1.519                                                        | 1.997                          | 1888.06            | 3770.79            | 3.034                          | 1463.37            | 4439.83            |
| A_68_P23299954 | chr4:129724880-129724924                          | NM_028266:-181          | Col16a1       | PROMOTER               | 1.519                                                        | 3.754                          | 598.62             | 2247.47            | 5.703                          | 528.13             | 3011.74            |
| A_68_P23318268 | chr4:133130953-133130997                          | NM_172876:315           | Gpatch3       | INSIDE                 | 1.519                                                        | 3.239                          | 1150.61            | 3726.47            | 4.921                          | 1036.16            | 5098.82            |
| A_68_P25301151 | chr7:95278746-95278790                            | NM_001081414:546091     | Grm5          | INSIDE                 | 1.519                                                        | 2.111                          | 1277.37            | 2695.95            | 3.206                          | 1012.31            | 3245.16            |
| A_68_P27995147 | chr11:87430388-87430432                           | NM_001045527:-255       | Hsf5          | PROMOTER               | 1.519                                                        | 4.025                          | 862.35             | 3470.63            | 6.115                          | 735.11             | 4494.96            |
| A_68_P22397067 | chr3:105255865-105255909                          | NM_019931:-5847         | Kend3         | PROMOTER               | 1.519                                                        | 2.065                          | 1408.52            | 2909.25            | 3.138                          | 1170.27            | 3672.79            |
| A_68_P25092719 | chr7:52625927-52625971                            | NM_011698:-14           | Lin7b         | PROMOTER               | 1.519                                                        | 2.163                          | 3110.79            | 6728.46            | 3.285                          | 2368.96            | 7782.17            |
| A_68_P26949005 | chr10:12810608-12810652                           | NM_009538:37            | Plagl1        | INSIDE                 | 1.519                                                        | 8.094                          | 996.87             | 8068.42            | 12.295                         | 851.53             | 10469.14           |
| A_68_P25672219 | chr8:14090321-14090365                            | NM_001034862:-15        | Erich1        | DIVERGENT_PROMOTER     | 1.518                                                        | 2.067                          | 1232.12            | 2546.24            | 3.138                          | 955.63             | 2998.66            |
| A_68_P28089851 | chr11:104093898-104093942                         | NM_001038609:1171       | Maip1         | INSIDE                 | 1.518                                                        | 3.201                          | 2664.13            | 8526.89            | 4.858                          | 2303.11            | 11189.67           |
| A_68_P28445674 | chr12:55169509-55169553                           | NM_013780:819867        | Npas3         | INSIDE                 | 1.518                                                        | 3.022                          | 1322.00            | 3995.28            | 4.587                          | 1122.49            | 5148.47            |
| A_68_P24114435 | chr5:135518130-135518174                          | NM_016801:18711         | Stx1a         | INSIDE                 | 1.518                                                        | 10.296                         | 11814.23           | 121639.30          | 15.628                         | 7533.59            | 117737.10          |
| A_68_P24151265 | chr5:142843572-142843616                          |                         |               | Unknown                | 1.518                                                        | 1.665                          | 1769.80            | 2946.27            | 2.527                          | 1501.31            | 3794.47            |
| A_68_P24182785 | chr5:149826986-149827030                          | ENSMUST00000133243:381  |               | INSIDE                 | 1.518                                                        | 3.325                          | 7588.27            | 25228.93           | 5.047                          | 4600.37            | 23216.64           |
| A_68_P30357863 | chr15:77950040-77950084                           | NM_007583:-352          | Caecng2       | PROMOTER               | 1.517                                                        | 2.852                          | 1563.96            | 4460.78            | 4.328                          | 1372.23            | 5939.16            |
| A_68_P21122760 | chr2:33496334-33496378                            | NM_010725:-325          | Lmx1b         | PROMOTER               | 1.517                                                        | 2.550                          | 1335.58            | 3406.27            | 3.870                          | 1103.55            | 4270.81            |
| A_68_P24337493 | chr6:31348815-31348859                            | NM_013791:9             | Mkln1         | INSIDE                 | 1.517                                                        | 7.206                          | 1344.21            | 9686.86            | 10.934                         | 1148.97            | 12562.71           |
| A_68_P31759277 | chr18:61867112-61867156                           | NM_172832:155           | Peyox11       | INSIDE                 | 1.517                                                        | 2.206                          | 3676.05            | 8109.10            | 3.347                          | 2825.32            | 9456.43            |
| A_68_P27896916 | chr11:69572824-69572871                           | NM_009089:-1122         | Polr2a        | PROMOTER               | 1.517                                                        | 1.649                          | 653.89             | 1078.34            | 2.502                          | 517.68             | 1295.20            |
| A_68_P29648697 | chr14:61791606-61791650                           | NM_172809:34335         | Sacs          | INSIDE                 | 1.517                                                        | 1.545                          | 1833.14            | 2833.14            | 2.345                          | 1362.27            | 3193.90            |
| A_68_P29033511 | chr13:51746883-51746927                           | NM_029279:-178          | Secisbp2      | PROMOTER               | 1.517                                                        | 2.454                          | 3102.77            | 7613.38            | 3.723                          | 2647.15            | 9854.78            |
| A_68_P29218723 | chr13:91600897-91600941                           | NM_024186:217           | Ssbp2         | INSIDE                 | 1.517                                                        | 4.122                          | 4099.33            | 16896.23           | 6.251                          | 3046.95            | 19047.37           |
| A_68_P27187531 | chr10:62188832-62188876                           | NM_001033260:-7         | Stox1         | PROMOTER               | 1.517                                                        | 3.109                          | 1793.62            | 5576.70            | 4.717                          | 1443.07            | 6807.33            |
| A_68_P29244723 | chr13:96902535-96902579                           | NM_029210:-24           | Sv2c          | PROMOTER               | 1.517                                                        | 1.877                          | 1202.09            | 2255.91            | 2.847                          | 970.77             | 2764.28            |
| A_68_P28520555 | chr12:71554358-71554402                           | NM_028339:240           | Tmx1          | INSIDE                 | 1.517                                                        | 1.462                          | 1187.01            | 1735.79            | 2.218                          | 1077.70            | 2390.47            |
| A_68_P22321608 | chr3:89577074-89577118                            | NM_027315:-434          | Ube2q1        | DIVERGENT_PROMOTER     | 1.517                                                        | 1.749                          | 2102.20            | 3677.00            | 2.653                          | 1641.16            | 4353.86            |
| A_68_P26350328 | A_68_P26350328                                    |                         |               | Unknown                | 1.517                                                        | 2.943                          | 449.87             | 1324.02            | 4.464                          | 345.01             | 1540.05            |
| A_68_P27288853 | chr10:80783632-80783676                           | NM_027381:-193          | 2510012I08Rik | PROMOTER               | 1.516                                                        | 1.546                          | 1103.03            | 1705.68            | 2.344                          | 891.15             | 2088.80            |
| A_68_P23467742 | chr5:8368117-8368161                              | NM_001098225:-57        | Adam22        | PROMOTER               | 1.516                                                        | 2.463                          | 690.62             | 1701.06            | 3.735                          | 631.65             | 2359.29            |
| A_68_P30350779 | chr15:76647508-76647552                           | NM_001168288:1070       | Arhgap39      | INSIDE                 | 1.516                                                        | 2.606                          | 1450.37            | 3779.73            | 3.952                          | 1090.58            | 4309.65            |
| A_68_P29338038 | chr13:113778161-113778205                         | NM_001081062:173        | Ceno          | INSIDE                 | 1.516                                                        | 1.461                          | 3379.73            | 4937.96            | 2.215                          | 2794.94            | 6190.79            |
| A_68_P31376862 | chr17:79755142-79755186                           | NM_026514:-733          | Cdc42ep3      | PROMOTER               | 1.516                                                        | 1.712                          | 474.69             | 812.66             | 2.596                          | 415.37             | 1078.28            |
| A_68_P27910787 | chr11:72128038-72128082                           | NM_001099688:115        | Fbxo39        | INSIDE                 | 1.516                                                        | 3.848                          | 1223.64            | 4709.14            | 5.834                          | 1038.74            | 6060.44            |
| A_68_P30148791 | chr15:38229661-38229705                           | NM_013692:780           | Klfl10        | INSIDE                 | 1.516                                                        | 5.717                          | 1731.12            | 9896.19            | 8.669                          | 1387.82            | 12030.48           |
| A_68_P23539922 | chr5:23606508-23606552                            | NM_001161800:123        | Klhl7         | INSIDE                 | 1.516                                                        | 1.684                          | 880.42             | 1482.98            | 2.553                          | 695.55             | 1775.95            |
| A_68_P25086960 | chr7:51607818-51607862                            | NM_001034115:42207      | Shank1        | INSIDE                 | 1.516                                                        | 5.044                          | 7768.35            | 39184.21           | 7.649                          | 5667.39            | 43348.23           |
| A_68_P28635993 | chr12:92886575-92886620                           | NM_175367:138279        | Ston2         | INSIDE                 | 1.516                                                        | 2.163                          | 294.02             | 636.00             | 3.280                          | 230.66             | 756.53             |
| A_68_P30980679 | chr16:94534837-94534881                           | ENSMUST00000163193:312  |               | INSIDE                 | 1.516                                                        | 4.109                          | 565.54             | 2323.63            | 6.228                          | 554.91             | 3456.16            |
| A_68_P31126996 | chr17:29406043-29406087                           | NM_030561:332           | BC004004      | INSIDE                 | 1.515                                                        | 3.081                          | 2100.11            | 6469.43            | 4.666                          | 1938.91            | 9046.55            |
| A_68_P28694110 | chr12:104116592-104116636                         | NM_172806:2             | Btdb7         | INSIDE                 | 1.515                                                        | 1.901                          | 366.82             | 697.42             | 2.881                          | 341.52             | 984.04             |
| A_68_P27784449 | chr11:49525483-49525527                           | NM_212484:708           | Cnot6         | INSIDE                 | 1.515                                                        | 4.727                          | 1217.49            | 5755.20            | 7.160                          | 1081.63            | 7744.99            |
| A_68_P26128587 | chr8:106966661-106966705                          | NM_001013380:265        | Dyne1li2      | INSIDE                 | 1.515                                                        | 3.010                          | 3069.91            | 9241.24            | 4.561                          | 2459.41            | 11216.76           |
| A_68_P26001982 | chr8:83403879-83403923                            | NM_021356:478           | Gab1          | INSIDE                 | 1.515                                                        | 4.546                          | 3277.91            | 14899.97           | 6.888                          | 2505.41            | 17257.68           |
| A_68_P25274814 | chr7:89079181-89079225                            | NM_013886:143           | Hdgfrp3       | INSIDE                 | 1.515                                                        | 3.405                          | 2741.20            | 9335.16            | 5.161                          | 2297.83            | 11858.66           |
| A_68_P30639681 | chr16:30070804-30070848                           | NM_008235:5384          | Hes1          | DOWNSTREAM             | 1.515                                                        | 1.520                          | 4721.65            | 1718.51            | 2.303                          | 3831.89            | 8826.15            |
| A_68_P25528895 | chr7:138685558-138685602                          | NM_008257:-896          | Hmx3          | PROMOTER               | 1.515                                                        | 2.685                          | 721.58             | 1937.75            | 4.069                          | 630.15             | 2564.25            |
| A_68_P28886522 | chr13:24373081-24373125                           | NM_026825:-443          | Lrrc16a       | PROMOTER               | 1.515                                                        | 5.019                          | 1735.70            | 8711.35            | 7.604                          | 1462.36            | 11119.99           |
| A_68_P24792500 | chr6:119280593-119280637                          | NM_001172207:-1392      | Lrtm2         | PROMOTER               | 1.515                                                        | 2.033                          | 2029.62            | 4125.92            | 3.080                          | 1634.56            | 5034.32            |

| ProbeName      | Target position of probe on CpG island microarray | TargetID           | GeneSymbol    | CpG island Description | Ratio of relative methylation (TiO <sub>2</sub> -NP/Vehicle) | Sham group                     |                    |                    | TiO <sub>2</sub> -H group      |                    |                    |
|----------------|---------------------------------------------------|--------------------|---------------|------------------------|--------------------------------------------------------------|--------------------------------|--------------------|--------------------|--------------------------------|--------------------|--------------------|
|                |                                                   |                    |               |                        |                                                              | Relative methylation (Cy5/Cy3) | Cy3 signal (Input) | Cy5 signal (MeDIP) | Relative methylation (Cy5/Cy3) | Cy3 signal (Input) | Cy5 signal (MeDIP) |
| A_68_P30020394 | chr15:12134922-12134966                           | NM_172958:96       | Mtmr12        | INSIDE                 | 1.515                                                        | 2.637                          | 924.58             | 2437.87            | 3.993                          | 797.05             | 3182.95            |
| A_68_P30139527 | chr15:36538715-36538759                           | NM_008774:-8       | Pabpc1        | PROMOTER               | 1.515                                                        | 1.917                          | 3127.60            | 5996.12            | 2.904                          | 2496.02            | 7248.76            |
| A_68_P22355467 | chr3:97462102-97462146                            | NM_182997:-10      | Prkab2        | PROMOTER               | 1.515                                                        | 4.803                          | 8266.35            | 39707.11           | 7.277                          | 6308.41            | 45903.36           |
| A_68_P26229674 | chr8:124431610-124431654                          | NM_011404:-46      | Slc7a5        | DIVERGENT_PROMOTER     | 1.515                                                        | 2.080                          | 3412.27            | 7097.53            | 3.152                          | 2669.32            | 8414.32            |
| A_68_P31351023 | chr17:74738587-74738631                           | NM_001162870:282   | Spast         | INSIDE                 | 1.515                                                        | 3.242                          | 614.24             | 1991.24            | 4.912                          | 530.71             | 2606.66            |
| A_68_P28161643 | chr11:116713965-116714009                         | NM_011358:422      | Srsf2         | INSIDE                 | 1.515                                                        | 2.553                          | 535.98             | 1368.48            | 3.867                          | 467.60             | 1808.41            |
| A_68_P20935551 | chr1:192803342-192803386                          | NR_027352:-189     | Vash2         | PROMOTER               | 1.515                                                        | 2.830                          | 1064.05            | 3011.52            | 4.287                          | 847.11             | 3631.88            |
| A_68_P32186048 | chr19:54119950-54119994                           | NM_007417:301      | Adra2a        | INSIDE                 | 1.514                                                        | 1.870                          | 1207.84            | 2258.19            | 2.830                          | 1019.30            | 2884.49            |
| A_68_P31524834 | chr18:16965463-16965507                           | NM_007664:2074     | Cdh2          | INSIDE                 | 1.514                                                        | 1.442                          | 5317.30            | 7667.13            | 2.183                          | 4181.25            | 9127.82            |
| A_68_P23222243 | chr4:114580052-114580096                          | NM_008593:1429     | Foxd2         | INSIDE                 | 1.514                                                        | 3.361                          | 1114.32            | 3744.93            | 5.088                          | 999.09             | 5082.91            |
| A_68_P27980051 | chr11:84683596-84683640                           | NM_153144:622      | Ggnbp2        | INSIDE                 | 1.514                                                        | 2.029                          | 3310.52            | 6716.55            | 3.072                          | 2466.36            | 7576.01            |
| A_68_P27977954 | chr11:84333936-84333980                           | NM_008498:5078     | Lhx1          | INSIDE                 | 1.514                                                        | 2.640                          | 571.16             | 1507.89            | 3.996                          | 476.27             | 1903.32            |
| A_68_P22601440 | chr3:143867896-143867940                          | NM_001161769:-2558 | Lmo4          | PROMOTER               | 1.514                                                        | 3.237                          | 4765.00            | 15423.48           | 4.901                          | 3566.87            | 17481.44           |
| A_68_P24156969 | chr5:144288624-144288668                          | NM_009007:215      | Rac1          | INSIDE                 | 1.514                                                        | 2.574                          | 1631.45            | 4199.18            | 3.897                          | 1284.55            | 5006.06            |
| A_68_P31943158 | chr19:8788397-8788441                             | NM_008577:-31      | Slc3a2        | PROMOTER               | 1.514                                                        | 3.055                          | 1784.84            | 5452.80            | 4.624                          | 1356.57            | 6272.64            |
| A_68_P25239159 | chr7:82453953-82453999                            | NM_001109753:-704  | Sv2b          | PROMOTER               | 1.514                                                        | 4.067                          | 2346.69            | 9543.51            | 6.158                          | 1944.04            | 11971.56           |
| A_68_P23397204 | chr4:148265329-148265373                          | NM_027195:86850    | Cas2l         | INSIDE                 | 1.513                                                        | 1.413                          | 1598.88            | 2258.72            | 2.138                          | 1270.07            | 2715.47            |
| A_68_P25392270 | chr7:112574421-112574465                          | NM_007627:109      | Cekbr         | INSIDE                 | 1.513                                                        | 3.964                          | 6148.54            | 24371.44           | 5.996                          | 5077.69            | 30446.86           |
| A_68_P31490815 | chr18:10609631-10609677                           | NM_001081222:696   | Esco1         | INSIDE                 | 1.513                                                        | 2.126                          | 827.03             | 1758.24            | 3.216                          | 726.99             | 2338.32            |
| A_68_P24620367 | chr6:88149612-88149656                            | NM_008090:977      | Gata2         | INSIDE                 | 1.513                                                        | 1.864                          | 2081.20            | 3879.08            | 2.820                          | 1736.45            | 4897.60            |
| A_68_P26220480 | chr8:123011650-123011694                          | NM_198671:-1093    | Gse1          | PROMOTER               | 1.513                                                        | 2.779                          | 968.75             | 2692.41            | 4.206                          | 807.18             | 3395.13            |
| A_68_P21038125 | chr2:17987169-17987213                            | NM_010804:10293    | Mllt10        | INSIDE                 | 1.513                                                        | 2.283                          | 1455.18            | 3322.77            | 3.454                          | 1218.79            | 4209.49            |
| A_68_P30560744 | chr16:14163261-14163305                           | NM_001114085:-85   | Nde1          | PROMOTER               | 1.513                                                        | 1.741                          | 1004.83            | 1749.37            | 2.633                          | 774.54             | 2039.73            |
| A_68_P31084402 | chr17:21082837-21082881                           | NM_016891:441      | Ppp2r1a       | INSIDE                 | 1.513                                                        | 1.991                          | 424.01             | 844.09             | 3.012                          | 391.52             | 1179.10            |
| A_68_P24445013 | chr6:51542631-51542675                            | NM_001127348:48131 | Snx10         | DOWNSTREAM             | 1.513                                                        | 1.619                          | 5835.38            | 9446.43            | 2.449                          | 4234.39            | 10370.79           |
| A_68_P30401894 | chr15:85456416-85456460                           |                    |               | Unknown                | 1.513                                                        | 4.687                          | 777.98             | 3646.20            | 7.091                          | 665.73             | 4720.50            |
| A_68_P23699554 | chr5:53658257-53658301                            | NM_001145433:-66   | 1810013D10Rik | PROMOTER               | 1.512                                                        | 1.927                          | 1747.30            | 3367.67            | 2.914                          | 1494.68            | 4355.06            |
| A_68_P24799551 | chr6:120615439-120615483                          | NM_001128151:-978  | Cecr2         | PROMOTER               | 1.512                                                        | 2.599                          | 2655.71            | 6901.62            | 3.928                          | 2199.66            | 8641.34            |
| A_68_P32769550 | chrX:154480805-154480849                          | NM_177751:216      | Cnksr2        | INSIDE                 | 1.512                                                        | 2.146                          | 1326.45            | 2845.95            | 3.244                          | 822.04             | 2667.04            |
| A_68_P23309923 | chr4:131604805-131604849                          | NM_001128606:167   | Epb4.1        | INSIDE                 | 1.512                                                        | 5.819                          | 1030.57            | 5996.78            | 8.796                          | 869.44             | 7647.47            |
| A_68_P23345562 | chr4:137952020-137952064                          | NM_001081672:331   | Fam43b        | INSIDE                 | 1.512                                                        | 2.773                          | 891.39             | 2472.07            | 4.193                          | 757.52             | 3175.97            |
| A_68_P26221250 | chr8:123112916-123112960                          | NM_178856:37       | Gins2         | INSIDE                 | 1.512                                                        | 1.444                          | 2567.51            | 3706.97            | 2.182                          | 2080.94            | 4541.31            |
| A_68_P24947962 | chr7:4098539-4098584                              | NM_172736:9904     | Leng8         | INSIDE                 | 1.512                                                        | 4.325                          | 1465.62            | 6339.23            | 6.541                          | 1229.91            | 8045.26            |
| A_68_P28162003 | chr11:116780529-116780573                         | NM_172948:374      | Mgat5b        | INSIDE                 | 1.512                                                        | 1.990                          | 423.87             | 843.57             | 3.008                          | 438.90             | 1320.33            |
| A_68_P31207975 | chr17:46766402-46766446                           | NM_175168:29       | Ptk7          | INSIDE                 | 1.512                                                        | 2.633                          | 12220.97           | 32171.92           | 3.980                          | 10248.26           | 40791.04           |
| A_68_P32234202 | chrX:5977172-5977216                              | NM_001040459:-68   | Shroom4       | PROMOTER               | 1.512                                                        | 2.645                          | 1691.44            | 4473.07            | 3.997                          | 1083.40            | 4330.82            |
| A_68_P23568207 | chr5:29896110-29896154                            | NM_133907:351      | Ubc3c         | INSIDE                 | 1.512                                                        | 2.739                          | 1584.16            | 4339.25            | 4.140                          | 1228.08            | 5084.59            |
| A_68_P25034247 | chr7:31740799-31740843                            | NM_011680:1002     | Ulf2          | INSIDE                 | 1.512                                                        | 2.427                          | 822.98             | 1997.11            | 3.670                          | 742.19             | 2723.71            |
| A_68_P32152243 | chr19:47911627-47911671                           | NM_027559:203      | Wdr96         | INSIDE                 | 1.512                                                        | 1.971                          | 1964.46            | 3872.11            | 2.981                          | 1536.97            | 4581.51            |
| A_68_P25364270 | chr7:107007573-107007617                          | NM_001164258:-133  | Xrra1         | DIVERGENT_PROMOTER     | 1.512                                                        | 3.183                          | 829.70             | 2640.68            | 4.811                          | 747.86             | 3598.25            |
| A_68_P23820887 | chr5:77738314-77738358                            | NM_019836:775      | 2610024G14Rik | INSIDE                 | 1.511                                                        | 2.988                          | 773.65             | 2311.49            | 4.515                          | 651.71             | 2942.33            |
| A_68_P30931894 | chr16:85900162-85900206                           | NM_011782:1186     | Adamts5       | INSIDE                 | 1.511                                                        | 4.290                          | 1821.56            | 7814.98            | 6.483                          | 1287.00            | 8343.12            |
| A_68_P24138663 | chr5:140449111-140449155                          | NM_175522:65236    | Elfn1         | INSIDE                 | 1.511                                                        | 1.973                          | 1056.98            | 2085.69            | 2.981                          | 1263.29            | 3766.04            |
| A_68_P31382195 | chr17:80689441-80689485                           | NM_194269:-89      | Morn2         | PROMOTER               | 1.511                                                        | 5.017                          | 1251.41            | 6278.01            | 7.579                          | 1032.08            | 7821.99            |
| A_68_P26016101 | chr8:86222687-86222731                            | NM_001199593:-4748 | Pkn1          | PROMOTER               | 1.511                                                        | 2.520                          | 992.70             | 2501.25            | 3.806                          | 882.85             | 3360.44            |
| A_68_P25553143 | chr7:142729512-142729556                          | NM_011212:28       | Ptpre         | INSIDE                 | 1.511                                                        | 3.674                          | 958.74             | 3522.72            | 5.553                          | 802.21             | 4454.28            |
| A_68_P22715106 | chr4:8463176-8463220                              | NM_021518:408      | Rab2a         | INSIDE                 | 1.511                                                        | 2.557                          | 1306.31            | 3340.23            | 3.864                          | 1128.70            | 4361.49            |
| A_68_P24328146 | chr6:29685667-29685711                            | NM_176996:192      | Smo           | INSIDE                 | 1.511                                                        | 4.847                          | 1094.66            | 5305.59            | 7.325                          | 874.54             | 6405.71            |
| A_68_P23696773 | chr5:53174399-53174443                            | NM_030185:115      | Zcche4        | INSIDE                 | 1.511                                                        | 2.632                          | 2596.84            | 6834.23            | 3.977                          | 2118.43            | 8424.77            |
| A_68_P24004682 | chr5:115017652-115017696                          | NM_001004180:-585  | BC057022      | PROMOTER               | 1.510                                                        | 2.639                          | 1484.21            | 3916.52            | 3.985                          | 1255.60            | 5003.35            |
| A_68_P20872965 | chr1:181889796-181889840                          | NM_001033285:-1401 | Cdc42bpa      | PROMOTER               | 1.510                                                        | 1.895                          | 2361.56            | 4474.53            | 2.861                          | 1933.91            | 5532.09            |



| ProbeName      | Target position of probe on CpG island microarray | TargetID                 | GeneSymbol    | CpG island Description | Ratio of relative methylation (TiO <sub>2</sub> -NP/Vehicle) | Sham group                     |                    |                    | TiO <sub>2</sub> -H group      |                    |                    |
|----------------|---------------------------------------------------|--------------------------|---------------|------------------------|--------------------------------------------------------------|--------------------------------|--------------------|--------------------|--------------------------------|--------------------|--------------------|
|                |                                                   |                          |               |                        |                                                              | Relative methylation (Cy5/Cy3) | Cy3 signal (Input) | Cy5 signal (MeDIP) | Relative methylation (Cy5/Cy3) | Cy3 signal (Input) | Cy5 signal (MeDIP) |
| A_68_P20885892 | chr1:184212460-184212504                          | NM_007853:408            | Degs1         | INSIDE                 | 1.510                                                        | 1.720                          | 462.28             | 795.14             | 2.597                          | 412.83             | 1072.19            |
| A_68_P26132767 | chr8:107813885-107813929                          | NM_177788:6092           | Exoc3l        | INSIDE                 | 1.510                                                        | 1.383                          | 3404.14            | 4707.23            | 2.088                          | 2623.45            | 5478.57            |
| A_68_P26220858 | chr8:123061951-123061995                          | NM_001145896:664         | Gse1          | INSIDE                 | 1.510                                                        | 3.980                          | 1269.37            | 5052.43            | 6.011                          | 964.46             | 5796.91            |
| A_68_P31259625 | chr17:57161925-57161969                           | NM_010613:8984           | Khsrp         | INSIDE                 | 1.510                                                        | 2.764                          | 4307.69            | 11905.11           | 4.173                          | 3401.95            | 14196.21           |
| A_68_P24520694 | chr6:67217359-67217403                            | NM_001113564:408         | Serbp1        | INSIDE                 | 1.510                                                        | 1.793                          | 659.14             | 1181.96            | 2.707                          | 523.12             | 1416.16            |
| A_68_P23283131 | chr4:126698502-126698546                          | NM_023603:-20            | Sfpq          | PROMOTER               | 1.510                                                        | 10.628                         | 252.76             | 2686.37            | 16.045                         | 227.79             | 3654.84            |
| A_68_P26540094 | chr9:56924177-56924221                            | NM_001110350:16          | Sin3a         | INSIDE                 | 1.510                                                        | 1.692                          | 1975.15            | 3341.37            | 2.555                          | 1590.03            | 4062.80            |
| A_68_P21748558 | chr2:152119855-152119899                          | NM_024196:269            | Tbc1d20       | INSIDE                 | 1.510                                                        | 3.767                          | 2842.08            | 10706.49           | 5.687                          | 2383.82            | 13556.14           |
| A_68_P25947840 | chr8:72273755-72273799                            | NM_001200023:85          | Zfp963        | INSIDE                 | 1.510                                                        | 2.939                          | 4922.90            | 14468.46           | 4.439                          | 3866.13            | 17161.24           |
| A_68_P21070248 | chr2:25023708-25023752                            |                          |               | Unknown                | 1.510                                                        | 1.986                          | 1032.55            | 2050.38            | 2.999                          | 889.93             | 2668.77            |
| A_68_P23062804 | chr4:83171213-83171257                            | NM_001081012:-214        | 4930473A06Rik | PROMOTER               | 1.509                                                        | 2.827                          | 912.04             | 2578.63            | 4.268                          | 849.60             | 3625.74            |
| A_68_P27932872 | chr11:76384849-76384893                           | NM_198895:6              | Abr           | INSIDE                 | 1.509                                                        | 1.675                          | 3476.87            | 5823.44            | 2.528                          | 2873.42            | 7262.84            |
| A_68_P27176099 | chr10:60150136-60150180                           | NM_023370:9080           | Cdh23         | INSIDE                 | 1.509                                                        | 2.178                          | 935.31             | 2037.03            | 3.287                          | 895.72             | 2944.61            |
| A_68_P26102842 | chr8:101939617-101939661                          | NM_001039154:719         | Cdh8          | INSIDE                 | 1.509                                                        | 4.432                          | 1458.56            | 6464.77            | 6.686                          | 1284.16            | 8586.35            |
| A_68_P32070425 | chr19:32560187-32560231                           | NM_010799:-50            | Minpp1        | PROMOTER               | 1.509                                                        | 2.151                          | 1498.34            | 3223.34            | 3.247                          | 1254.33            | 4072.98            |
| A_68_P25954894 | chr8:73437692-73437736                            | NM_173013:7842           | Mtap1s        | PROMOTER               | 1.509                                                        | 2.762                          | 422.18             | 1166.14            | 4.169                          | 350.12             | 1459.49            |
| A_68_P27168073 | chr10:58785999-58786043                           | NM_011030:-23            | P4ha1         | PROMOTER               | 1.509                                                        | 2.524                          | 683.06             | 1724.28            | 3.809                          | 537.46             | 2046.99            |
| A_68_P28035927 | chr11:94853399-94853443                           | NM_172261:895            | Ppp1r9b       | INSIDE                 | 1.509                                                        | 4.641                          | 494.07             | 2292.84            | 7.001                          | 468.52             | 3280.20            |
| A_68_P31612299 | chr18:34490607-34490651                           | NM_025527:-170           | Srp19         | PROMOTER               | 1.509                                                        | 2.820                          | 1687.65            | 4759.55            | 4.255                          | 1369.71            | 5827.73            |
| A_68_P20634933 | chr1:136605811-136605855                          | NM_009307:62575          | Syt2          | INSIDE                 | 1.509                                                        | 2.023                          | 1859.43            | 3762.50            | 3.053                          | 1570.85            | 4795.85            |
| A_68_P28871497 | chr13:21271956-21272000                           | NM_009054:151            | Trim27        | INSIDE                 | 1.509                                                        | 1.526                          | 771.34             | 1177.15            | 2.304                          | 742.76             | 1710.95            |
| A_68_P27287631 | chr10:80600637-80600681                           | NM_010731:1643           | Zbtb7a        | INSIDE                 | 1.509                                                        | 2.562                          | 2040.84            | 5227.85            | 3.864                          | 1790.23            | 6917.92            |
| A_68_P27914868 | chr11:72861634-72861678                           | NM_025818:288            | 1200014J11Rik | INSIDE                 | 1.508                                                        | 2.998                          | 3522.26            | 10560.49           | 4.520                          | 2793.53            | 12627.23           |
| A_68_P21419477 | chr2:90729763-90729807                            | NM_026161:3842           | C1qtnf4       | INSIDE                 | 1.508                                                        | 2.241                          | 777.41             | 1742.33            | 3.381                          | 697.75             | 2358.80            |
| A_68_P24757354 | chr6:113026958-113027002                          | NR_027010:258            | Gt(ROSA)26Sor | INSIDE                 | 1.508                                                        | 2.265                          | 1639.14            | 3713.15            | 3.417                          | 1379.95            | 4714.75            |
| A_68_P27189032 | chr10:62486795-62486839                           | NM_001079824:-219        | Hnrnp3        | DIVERGENT_PROMOTER     | 1.508                                                        | 2.966                          | 1117.74            | 3315.50            | 4.472                          | 978.50             | 4376.19            |
| A_68_P30925479 | chr16:84774664-84774708                           | NM_023844:319            | Jam2          | INSIDE                 | 1.508                                                        | 3.443                          | 838.56             | 2887.49            | 5.193                          | 795.58             | 4131.20            |
| A_68_P31251161 | chr17:55585081-55585126                           | NM_172829:89             | St6gal2       | INSIDE                 | 1.508                                                        | 1.632                          | 618.68             | 1009.67            | 2.461                          | 567.75             | 1397.19            |
| A_68_P26626137 | chr9:71959791-71959835                            | NM_011544:-186           | Tcf12         | PROMOTER               | 1.508                                                        | 4.049                          | 2317.19            | 9381.37            | 6.106                          | 2028.59            | 12386.53           |
| A_68_P22630580 | chr3:148653297-148653341                          | ENSMUST00000098518:-1038 |               | PROMOTER               | 1.508                                                        | 1.703                          | 1888.29            | 3215.15            | 2.567                          | 1552.98            | 3987.28            |
| A_68_P27169799 | chr10:59079055-59079099                           | NM_001033259:364         | Ccdc109a      | INSIDE                 | 1.507                                                        | 1.574                          | 2053.34            | 3232.15            | 2.371                          | 1593.85            | 3779.80            |
| A_68_P31890103 | chr18:84855123-84855167                           | NM_023149:-119           | Cndp2         | PROMOTER               | 1.507                                                        | 2.250                          | 7270.70            | 16356.27           | 3.391                          | 5158.92            | 17494.56           |
| A_68_P26542219 | chr9:57369547-57369591                            | NM_007747:530            | Cox5a         | INSIDE                 | 1.507                                                        | 1.737                          | 1447.75            | 2514.73            | 2.617                          | 1202.89            | 3148.03            |
| A_68_P31677413 | chr18:46685542-46685586                           | NM_173423:61             | Fem1c         | INSIDE                 | 1.507                                                        | 1.993                          | 1402.64            | 2795.91            | 3.005                          | 1532.05            | 4603.56            |
| A_68_P20184678 | chr1:42755116-42755160                            | NM_008900:1148           | Pou3f3        | INSIDE                 | 1.507                                                        | 3.857                          | 1035.60            | 3994.36            | 5.813                          | 842.84             | 4899.23            |
| A_68_P20632910 | chr1:136241239-136241283                          | NM_001042485:17316       | Tmem183a      | DOWNSTREAM             | 1.507                                                        | 1.589                          | 1960.62            | 3116.15            | 2.395                          | 1775.76            | 4253.73            |
| A_68_P21094978 | chr2:28910349-28910393                            | NM_001166705:216         | 1700101E01Rik | INSIDE                 | 1.506                                                        | 1.659                          | 1643.86            | 2726.81            | 2.498                          | 1408.24            | 3517.32            |
| A_68_P26486127 | chr9:47339193-47339237                            | NM_001025600:780         | Cadm1         | INSIDE                 | 1.506                                                        | 2.674                          | 550.83             | 1472.74            | 4.026                          | 421.57             | 1697.37            |
| A_68_P29856055 | chr14:102039383-102039427                         | NM_001033132:284         | Commd6        | INSIDE                 | 1.506                                                        | 3.406                          | 2079.90            | 7084.80            | 5.129                          | 1713.73            | 8790.10            |
| A_68_P23415959 | chr4:151383528-151383572                          | NM_001033352:551         | Klhl21        | INSIDE                 | 1.506                                                        | 1.829                          | 351.42             | 642.62             | 2.754                          | 315.28             | 868.14             |
| A_68_P20352133 | chr1:75121786-75121830                            | NM_029342:-8             | Nhej1         | PROMOTER               | 1.506                                                        | 3.573                          | 3084.75            | 11022.24           | 5.382                          | 2114.11            | 11378.24           |
| A_68_P21820253 | chr2:164705104-164705148                          | NM_146129:259            | Peif1         | INSIDE                 | 1.506                                                        | 2.676                          | 1462.77            | 3914.74            | 4.030                          | 1325.28            | 5340.69            |
| A_68_P27288650 | chr10:80755715-80755759                           | NM_001146687:20          | Pip5k1c       | INSIDE                 | 1.506                                                        | 2.439                          | 1510.25            | 3683.36            | 3.672                          | 1267.97            | 4656.54            |
| A_68_P26596131 | chr9:66794074-66794118                            | NM_026467:172            | Rps27l        | INSIDE                 | 1.506                                                        | 2.303                          | 551.36             | 1269.99            | 3.468                          | 380.12             | 1318.23            |
| A_68_P25351157 | chr7:104729030-104729074                          | NM_001081267:647         | Rsf1          | INSIDE                 | 1.506                                                        | 2.725                          | 802.51             | 2186.66            | 4.104                          | 732.60             | 3006.58            |
| A_68_P25592703 | chr7:149246867-149246911                          | NM_028308:51             | 2700078K21Rik | INSIDE                 | 1.505                                                        | 3.078                          | 809.83             | 2492.47            | 4.632                          | 861.56             | 3990.66            |
| A_68_P30587610 | chr16:20425965-20426009                           | NM_013790:481            | Abcc5         | INSIDE                 | 1.505                                                        | 2.189                          | 1643.18            | 3597.22            | 3.294                          | 1348.96            | 4443.74            |
| A_68_P20231550 | chr1:53409540-53409584                            | NM_133728:-19            | Asnsd1        | PROMOTER               | 1.505                                                        | 3.087                          | 1517.71            | 4684.89            | 4.647                          | 1377.76            | 6402.13            |
| A_68_P30333008 | chr15:73670325-73670369                           | NM_001033365:-245        | Gm628         | PROMOTER               | 1.505                                                        | 1.455                          | 862.56             | 1255.19            | 2.189                          | 759.49             | 1662.90            |
| A_68_P25525511 | chr7:138079707-138079751                          | NM_019564:12             | Htra1         | INSIDE                 | 1.505                                                        | 1.501                          | 3874.53            | 5817.41            | 2.260                          | 3128.33            | 7070.53            |
| A_68_P28060084 | chr11:98902871-98902915                           | NM_010517:319            | Igfbp4        | INSIDE                 | 1.505                                                        | 1.812                          | 1193.02            | 2161.77            | 2.726                          | 1051.81            | 2867.48            |

| ProbeName      | Target position of probe on CpG island microarray | TargetID                  | GeneSymbol    | CpG island Description | Ratio of relative methylation (TiO <sub>2</sub> -NP/Vehicle) | Sham group                     |                    |                    | TiO <sub>2</sub> -H group      |                    |                    |
|----------------|---------------------------------------------------|---------------------------|---------------|------------------------|--------------------------------------------------------------|--------------------------------|--------------------|--------------------|--------------------------------|--------------------|--------------------|
|                |                                                   |                           |               |                        |                                                              | Relative methylation (Cy5/Cy3) | Cy3 signal (Input) | Cy5 signal (MeDIP) | Relative methylation (Cy5/Cy3) | Cy3 signal (Input) | Cy5 signal (MeDIP) |
| A_68_P29616407 | chr14:55733626-55733670                           | NM_177049:2124            | Jph4          | INSIDE                 | 1.505                                                        | 3.567                          | 6810.59            | 24294.32           | 5.368                          | 4485.51            | 24077.71           |
| A_68_P30984747 | chr16:95219135-95219179                           | NM_001025584:147          | Kenj6         | INSIDE                 | 1.505                                                        | 6.088                          | 1997.49            | 12160.32           | 9.160                          | 1688.40            | 15466.36           |
| A_68_P26068285 | chr8:95379185-95379229                            | NM_173014:-42             | Lpcat2        | PROMOTER               | 1.505                                                        | 6.893                          | 3200.62            | 22061.99           | 10.374                         | 2288.30            | 23738.41           |
| A_68_P27891735 | chr11:68666059-68666103                           | NM_023668:553             | Ndel1         | INSIDE                 | 1.505                                                        | 1.532                          | 1208.31            | 1851.00            | 2.306                          | 966.35             | 2228.04            |
| A_68_P31323668 | chr17:69733260-69733304                           | NM_009547:-35             | Zfp161        | PROMOTER               | 1.505                                                        | 4.474                          | 2569.08            | 11495.08           | 6.736                          | 2114.62            | 14243.16           |
| A_68_P32288519 | chrX:20002775-20002819                            | ENSMUST00000115384:-17    |               | PROMOTER               | 1.505                                                        | 2.230                          | 1112.18            | 2480.71            | 3.356                          | 672.13             | 2255.95            |
| A_68_P30345268 | chr15:75812328-75812373                           | NM_001163518:365          | 2410075B13Rik | INSIDE                 | 1.504                                                        | 2.082                          | 651.05             | 1355.76            | 3.133                          | 588.82             | 1844.67            |
| A_68_P32443538 | chrX:66613886-66613930                            | NM_008032:403             | Af2           | INSIDE                 | 1.504                                                        | 1.550                          | 1876.72            | 2909.56            | 2.332                          | 929.04             | 2166.58            |
| A_68_P32576287 | chrX:101396366-101396410                          | NM_001077354:68           | C77370        | INSIDE                 | 1.504                                                        | 4.104                          | 553.75             | 2272.55            | 6.172                          | 442.53             | 2731.40            |
| A_68_P27813685 | chr11:54911498-54911542                           | NM_010299:34              | Gm2a          | INSIDE                 | 1.504                                                        | 4.655                          | 2755.36            | 12826.30           | 7.003                          | 2025.41            | 14183.33           |
| A_68_P27127187 | chr10:49502783-49502839                           | NM_001111268:5750         | Grik2         | INSIDE                 | 1.504                                                        | 2.794                          | 331.81             | 927.16             | 4.203                          | 255.99             | 1075.91            |
| A_68_P28152414 | chr11:115126813-115126857                         | NM_010350:1723            | Grin2c        | INSIDE                 | 1.504                                                        | 1.820                          | 7588.84            | 13811.37           | 2.738                          | 5649.71            | 15466.21           |
| A_68_P25971363 | chr8:77517838-77517882                            | NM_178017:259             | Hmgxb4        | INSIDE                 | 1.504                                                        | 3.776                          | 1144.27            | 4320.45            | 5.679                          | 1081.27            | 6140.09            |
| A_68_P29071664 | chr13:58228883-58228927                           | NM_029872:1013            | Hnrnpa0       | INSIDE                 | 1.504                                                        | 3.383                          | 2280.21            | 7714.19            | 5.090                          | 1800.45            | 9163.93            |
| A_68_P20646088 | chr1:138363089-138363133                          | NM_001081258:-1424        | Kif14         | PROMOTER               | 1.504                                                        | 5.511                          | 2003.58            | 11041.10           | 8.290                          | 1645.78            | 13643.44           |
| A_68_P25922763 | chr8:66684161-66684205                            | NM_009390:608             | Tll1          | INSIDE                 | 1.504                                                        | 2.938                          | 650.04             | 1910.15            | 4.418                          | 499.30             | 2205.96            |
| A_68_P30593950 | chr16:21694881-21694925                           | NM_001001881:-164         | 2510009E07Rik | PROMOTER               | 1.503                                                        | 0.434                          | 1506.73            | 654.64             | 0.653                          | 1233.71            | 805.79             |
| A_68_P26569977 | chr9:62192249-62192293                            | NM_009672:3121            | Amp32a        | INSIDE                 | 1.503                                                        | 1.406                          | 1688.30            | 2373.21            | 2.113                          | 1514.34            | 3199.71            |
| A_68_P27643047 | chr11:22758992-22759036                           | NM_016888:721             | B3gnt2        | INSIDE                 | 1.503                                                        | 2.345                          | 1392.02            | 3264.16            | 3.524                          | 1171.12            | 4127.43            |
| A_68_P21646236 | chr2:133380456-133380500                          | NM_007553:1544            | Bmp2          | INSIDE                 | 1.503                                                        | 3.428                          | 1928.92            | 6612.98            | 5.151                          | 1538.58            | 7925.62            |
| A_68_P20778063 | chr1:164407783-164407827                          | NM_001038619:357          | Dnm3          | INSIDE                 | 1.503                                                        | 2.197                          | 2396.10            | 5263.29            | 3.302                          | 1800.71            | 5945.11            |
| A_68_P23300612 | chr4:129816147-129816191                          | NM_001163027:-373         | Hcrtr1        | PROMOTER               | 1.503                                                        | 1.713                          | 3407.08            | 5835.44            | 2.575                          | 2819.48            | 7260.01            |
| A_68_P28518531 | chr12:71213190-71213234                           | NM_008697:-300            | Nin           | PROMOTER               | 1.503                                                        | 3.023                          | 1996.26            | 6034.16            | 4.544                          | 1812.79            | 8237.10            |
| A_68_P27287763 | chr10:80617060-80617104                           | NM_021501:13383           | Pias4         | INSIDE                 | 1.503                                                        | 3.958                          | 1158.08            | 4583.60            | 5.950                          | 877.19             | 5219.09            |
| A_68_P28566640 | chr12:80013209-80013253                           | NM_013738:-5305           | Plek2         | PROMOTER               | 1.503                                                        | 1.504                          | 2873.07            | 4322.23            | 2.261                          | 2125.31            | 4805.89            |
| A_68_P21745020 | chr2:151457975-151458019                          | NM_198214:273             | SnpH          | INSIDE                 | 1.503                                                        | 4.184                          | 431.24             | 1804.12            | 6.287                          | 374.44             | 2354.14            |
| A_68_P25777211 | chr8:36028290-36028334                            | NM_175091:432             | Tnks          | INSIDE                 | 1.503                                                        | 3.928                          | 823.33             | 3233.88            | 5.903                          | 639.69             | 3775.94            |
| A_68_P21936419 | chr3:9251754-9251798                              | NM_177660:1210            | Zbtb10        | INSIDE                 | 1.503                                                        | 2.892                          | 5521.23            | 15969.96           | 4.346                          | 4422.08            | 19220.12           |
| A_68_P22880598 | chr4:45025167-45025211                            | NM_001163283:96           | Zbtb5         | INSIDE                 | 1.503                                                        | 4.230                          | 645.60             | 2730.70            | 6.358                          | 540.93             | 3439.40            |
| A_68_P26218677 | chr8:122752875-122752919                          | ENSMUST00000127664:318156 |               | INSIDE                 | 1.503                                                        | 7.820                          | 1854.22            | 14499.10           | 11.750                         | 1420.25            | 16687.41           |
| A_68_P24135766 | chr5:139936328-139936372                          | NM_028469:138             | 3110082I17Rik | INSIDE                 | 1.502                                                        | 1.936                          | 4745.40            | 9185.42            | 2.908                          | 3667.44            | 10663.21           |
| A_68_P30599077 | chr16:22657267-22657311                           | NM_138650:16              | Dgkg          | INSIDE                 | 1.502                                                        | 1.609                          | 1659.05            | 2669.27            | 2.416                          | 1302.66            | 3147.24            |
| A_68_P28553818 | chr12:77505144-77505188                           | NM_008301:-190            | Hspa2         | PROMOTER               | 1.502                                                        | 3.614                          | 2028.44            | 7330.59            | 5.430                          | 1623.90            | 8817.36            |
| A_68_P28036074 | chr11:94871790-94871834                           | NM_146025:620             | Samd14        | INSIDE                 | 1.502                                                        | 2.501                          | 2221.81            | 5557.73            | 3.757                          | 1714.51            | 6441.51            |
| A_68_P31931517 | chr19:5894108-5894152                             | NM_198634:-23             | Tigd3         | PROMOTER               | 1.502                                                        | 1.820                          | 1100.87            | 2003.78            | 2.734                          | 879.37             | 2403.95            |
| A_68_P30255512 | chr15:59479961-59480005                           | NM_144549:-226            | Trib1         | PROMOTER               | 1.502                                                        | 2.370                          | 2851.21            | 6758.58            | 3.560                          | 2415.27            | 8599.13            |
| A_68_P28931383 | chr13:32894479-32894523                           | NM_030215:602             | Wrnip1        | INSIDE                 | 1.502                                                        | 3.982                          | 1699.99            | 6769.26            | 5.980                          | 1708.82            | 10218.32           |
| A_68_P29063253 | chr13:56854488-56854532                           | AK131829:678              |               | INSIDE                 | 1.502                                                        | 4.787                          | 2312.37            | 11068.22           | 7.188                          | 1936.18            | 13917.98           |
| A_68_P21094081 | chr2:28764046-28764090                            | NM_019446:7873            | Barhl1        | INSIDE                 | 1.501                                                        | 2.176                          | 1638.99            | 3567.19            | 3.267                          | 1373.26            | 4487.10            |
| A_68_P27476525 | chr10:116018687-116018731                         | NM_001037846:-141         | Cnot2         | PROMOTER               | 1.501                                                        | 2.634                          | 907.22             | 2389.64            | 3.952                          | 776.04             | 3067.27            |
| A_68_P21202301 | chr2:49307033-49307077                            | NM_172663:49              | Epc2          | INSIDE                 | 1.501                                                        | 2.387                          | 1763.84            | 4209.42            | 3.583                          | 1485.53            | 5322.72            |
| A_68_P23525900 | chr5:20931065-20931109                            | NM_177869:366             | Fam185a       | INSIDE                 | 1.501                                                        | 1.522                          | 1176.74            | 1790.95            | 2.284                          | 1000.93            | 2286.17            |
| A_68_P23295046 | chr4:128798355-128798400                          | NM_010471:158             | Hpc4          | INSIDE                 | 1.501                                                        | 5.295                          | 891.80             | 4722.32            | 7.947                          | 799.18             | 6350.88            |
| A_68_P27927426 | chr11:75469605-75469649                           | NM_001080775:110          | Myo1c         | INSIDE                 | 1.501                                                        | 3.042                          | 780.85             | 2375.39            | 4.567                          | 661.02             | 3019.16            |
| A_68_P27678665 | chr11:30167644-30167688                           | ENSMUST00000146985:203    |               | INSIDE                 | 1.501                                                        | 7.255                          | 3141.26            | 22790.57           | 10.889                         | 2975.88            | 32405.32           |
| A_68_P22148834 | chr3:54437446-54437490                            | ENSMUST00000172420:2108   |               | INSIDE                 | 1.501                                                        | 4.213                          | 925.25             | 3898.13            | 6.324                          | 727.00             | 4597.46            |
| A_68_P20584830 | chr1:127331799-127331843                          | NM_001205385:484          | Actr3         | INSIDE                 | 1.500                                                        | 2.916                          | 7966.52            | 23227.85           | 4.375                          | 6005.45            | 26271.98           |
| A_68_P23447646 | chr5:3928274-3928318                              | NM_194462:111             | Akap9         | INSIDE                 | 1.500                                                        | 2.272                          | 1022.53            | 2322.79            | 3.408                          | 789.77             | 2691.39            |
| A_68_P24186507 | chr5:150480724-150480768                          | NM_001081204:-85          | B3galt1       | PROMOTER               | 1.500                                                        | 1.836                          | 485.61             | 891.45             | 2.753                          | 476.66             | 1312.40            |
| A_68_P31097616 | chr17:24625344-24625388                           | NM_027937:-361            | Caskin1       | DIVERGENT_PROMOTER     | 1.500                                                        | 1.672                          | 796.20             | 1330.91            | 2.508                          | 669.03             | 1677.63            |
| A_68_P23571444 | chr5:30559486-30559531                            | NM_027652:351             | Ept1          | INSIDE                 | 1.500                                                        | 1.791                          | 1159.99            | 2077.24            | 2.686                          | 1065.22            | 2860.95            |

| ProbeName      | Target position of probe on CpG island microarray | TargetID                  | GeneSymbol    | CpG island Description | Ratio of relative methylation (TiO <sub>2</sub> -NP/Vehicle) | Sham group                     |                    |                    | TiO <sub>2</sub> -H group      |                    |                    |
|----------------|---------------------------------------------------|---------------------------|---------------|------------------------|--------------------------------------------------------------|--------------------------------|--------------------|--------------------|--------------------------------|--------------------|--------------------|
|                |                                                   |                           |               |                        |                                                              | Relative methylation (Cy5/Cy3) | Cy3 signal (Input) | Cy5 signal (MeDIP) | Relative methylation (Cy5/Cy3) | Cy3 signal (Input) | Cy5 signal (MeDIP) |
| A_68_P32823846 | chrX:166435801-166435845                          | NM_183151:118269          | Mid1          | DOWNSTREAM             | 1.500                                                        | 1.929                          | 3218.86            | 6210.66            | 2.895                          | 3388.99            | 9809.69            |
| A_68_P21152640 | chr2:39046217-39046261                            | NM_178778:12              | Scal          | INSIDE                 | 1.500                                                        | 2.913                          | 813.18             | 2369.11            | 4.370                          | 698.70             | 3053.46            |
| A_68_P24141204 | chr5:140865179-140865223                          | NM_172277:1               | Snx8          | INSIDE                 | 1.500                                                        | 1.386                          | 1327.27            | 1839.93            | 2.079                          | 1159.03            | 2409.47            |
| A_68_P27835858 | chr11:59077515-59077559                           | NM_009522:26717           | Wnt3a         | INSIDE                 | 1.500                                                        | 2.344                          | 2131.54            | 4997.33            | 3.518                          | 1898.80            | 6679.52            |
| A_68_P26350251 | chr9:21860554-21860598                            | NM_177318:15213           | Zfp653        | INSIDE                 | 1.500                                                        | 2.831                          | 1323.23            | 3746.33            | 4.247                          | 1055.78            | 4483.80            |
| A_68_P32977632 | A_68_P32977632                                    |                           |               | Unknown                | 1.500                                                        | 4.971                          | 1611.43            | 8011.05            | 7.456                          | 1167.80            | 8707.48            |
| A_68_P30402200 | chr15:85501825-85501869                           | AK038224:-5325            |               | PROMOTER               | 1.500                                                        | 3.951                          | 537.13             | 2122.34            | 5.926                          | 487.27             | 2887.43            |
| A_68_P25486797 | chr7:131127028-131127072                          | ENSMUST00000106437:668    |               | INSIDE                 | 1.500                                                        | 1.926                          | 661.20             | 1273.48            | 2.889                          | 547.21             | 1580.74            |
| A_68_P32410978 | chrX:56820599-56820643                            | ENSMUST00000124402:29     |               | INSIDE                 | 1.500                                                        | 3.436                          | 446.12             | 1532.94            | 5.153                          | 273.20             | 1407.78            |
| A_68_P22540995 | chr3:132754697-132754741                          | NM_026231:-14             | Gsted         | DIVERGENT_PROMOTER     | 1.499                                                        | 2.324                          | 672.14             | 1561.92            | 3.483                          | 565.10             | 1968.07            |
| A_68_P27922692 | chr11:74644684-74644728                           | NM_010813:281             | Mnt           | INSIDE                 | 1.499                                                        | 2.830                          | 1929.46            | 5460.65            | 4.243                          | 1709.52            | 7252.82            |
| A_68_P29977213 | chr15:3976841-3976885                             | NM_024188:435             | Oxct1         | INSIDE                 | 1.499                                                        | 3.650                          | 544.74             | 1988.15            | 5.470                          | 451.02             | 2467.31            |
| A_68_P28194540 | chr12:3309680-3309724                             | NM_016676:267             | Rab10         | INSIDE                 | 1.499                                                        | 4.003                          | 1635.64            | 6547.04            | 6.001                          | 1438.90            | 8635.07            |
| A_68_P23283135 | chr4:126699373-126699417                          | NM_023603:850             | Sfpq          | INSIDE                 | 1.499                                                        | 8.155                          | 8727.66            | 71176.42           | 12.221                         | 6037.34            | 73783.94           |
| A_68_P28938194 | chr13:34436403-34436447                           | NM_001033167:627          | Stc22a23      | INSIDE                 | 1.499                                                        | 1.665                          | 1049.25            | 1747.35            | 2.496                          | 979.35             | 2444.71            |
| A_68_P30387965 | chr15:83197791-83197835                           | NR_027980:-85             | 1700001L05Rik | PROMOTER               | 1.498                                                        | 3.254                          | 10728.36           | 34910.23           | 4.876                          | 7471.87            | 36432.60           |
| A_68_P21436146 | chr2:93482709-93482753                            | NM_007442:140             | Alx4          | INSIDE                 | 1.498                                                        | 3.971                          | 1582.58            | 6284.85            | 5.950                          | 1249.96            | 7437.44            |
| A_68_P21630555 | chr2:130406725-130406769                          | NM_009732:1531            | Avp           | INSIDE                 | 1.498                                                        | 1.378                          | 5629.21            | 7758.02            | 2.064                          | 4446.85            | 9178.68            |
| A_68_P31921521 | chr19:4169457-4169501                             | NM_134148:6001            | Carns1        | INSIDE                 | 1.498                                                        | 1.811                          | 5127.86            | 9285.25            | 2.712                          | 3896.91            | 10569.98           |
| A_68_P28098603 | chr11:105805256-105805300                         | NM_007805:183             | Cyb561        | INSIDE                 | 1.498                                                        | 3.582                          | 1476.04            | 5286.87            | 5.364                          | 1148.77            | 6161.80            |
| A_68_P25554390 | chr7:142907763-142907807                          | NM_001081117:278          | Mki67         | INSIDE                 | 1.498                                                        | 1.812                          | 1042.27            | 1888.86            | 2.715                          | 958.07             | 2601.06            |
| A_68_P29753346 | chr14:80170179-80170223                           | NM_001042726:919          | Pedh8         | INSIDE                 | 1.498                                                        | 1.635                          | 727.63             | 1189.84            | 2.450                          | 621.18             | 1521.77            |
| A_68_P22889129 | chr4:46520101-46520145                            | NM_029077:28894           | Trim14        | INSIDE                 | 1.498                                                        | 2.217                          | 1000.12            | 2216.93            | 3.321                          | 989.66             | 3286.24            |
| A_68_P26601300 | chr9:67688155-67688199                            | NM_177184:-26             | Vps13c        | DIVERGENT_PROMOTER     | 1.498                                                        | 5.144                          | 3237.18            | 16652.92           | 7.705                          | 2570.25            | 19803.03           |
| A_68_P28596933 | chr12:85534608-85534652                           | NM_001163502:335          | C130039016Rik | INSIDE                 | 1.497                                                        | 5.387                          | 1169.98            | 6302.50            | 8.063                          | 1274.29            | 10274.97           |
| A_68_P26762950 | chr9:99144040-99144084                            | NM_023873:176             | Cep70         | INSIDE                 | 1.497                                                        | 6.111                          | 1295.82            | 7919.20            | 9.151                          | 1096.40            | 10033.53           |
| A_68_P20794600 | chr1:167390414-167390458                          | NM_028759:158             | Deaf6         | INSIDE                 | 1.497                                                        | 2.139                          | 2568.30            | 5493.40            | 3.201                          | 2066.97            | 6616.97            |
| A_68_P29751618 | chr14:79880592-79880636                           | NM_007920:-386            | Elf1          | PROMOTER               | 1.497                                                        | 2.751                          | 378.29             | 1040.82            | 4.118                          | 390.19             | 1606.65            |
| A_68_P30363895 | chr15:78858579-78858623                           | NM_008197:-41             | H1f0          | PROMOTER               | 1.497                                                        | 2.021                          | 385.83             | 779.59             | 3.024                          | 312.88             | 946.11             |
| A_68_P31936765 | chr19:7008355-7008399                             | NM_008431:629             | Kenk4         | INSIDE                 | 1.497                                                        | 1.604                          | 5143.15            | 8248.42            | 2.400                          | 3717.11            | 8922.84            |
| A_68_P21101981 | chr2:30093673-30093717                            | NM_177725:406             | Lrre8a        | INSIDE                 | 1.497                                                        | 1.509                          | 1338.03            | 2019.61            | 2.260                          | 1058.68            | 2392.53            |
| A_68_P30252145 | chr15:58913581-58913625                           | NM_001146180:-21          | Mtss1         | PROMOTER               | 1.497                                                        | 3.797                          | 3359.57            | 12755.92           | 5.685                          | 2750.82            | 15637.27           |
| A_68_P26744225 | chr9:95745638-95745682                            | NM_001033210:38           | Pls1          | INSIDE                 | 1.497                                                        | 2.484                          | 3334.46            | 8281.80            | 3.717                          | 2629.21            | 9772.42            |
| A_68_P24152262 | chr5:143027306-143027350                          | NM_178702:-297            | Radil         | PROMOTER               | 1.497                                                        | 1.658                          | 2003.76            | 3323.21            | 2.483                          | 1539.05            | 3821.45            |
| A_68_P28051255 | chr11:97407967-97408011                           | NM_018873:28452           | Srcin1        | INSIDE                 | 1.497                                                        | 3.347                          | 1094.35            | 3663.05            | 5.011                          | 871.73             | 4368.59            |
| A_68_P27981398 | chr11:84953893-84953937                           | NM_001029934:-457         | Usp32         | PROMOTER               | 1.497                                                        | 2.203                          | 743.47             | 1638.01            | 3.298                          | 590.65             | 1948.14            |
| A_68_P26801603 | chr9:106073078-106073122                          | NM_029896:-159            | Wdr82         | PROMOTER               | 1.497                                                        | 2.599                          | 798.22             | 2074.18            | 3.889                          | 757.80             | 2947.20            |
| A_68_P27797797 | chr11:51981491-51981535                           | ENSMUST00000155549:101504 |               | INSIDE                 | 1.497                                                        | 2.585                          | 570.77             | 1475.40            | 3.870                          | 508.48             | 1967.72            |
| A_68_P24671353 | chr6:97098869-97098913                            | NM_175313:-13             | A130022J15Rik | PROMOTER               | 1.496                                                        | 2.483                          | 1343.44            | 3335.11            | 3.713                          | 1158.58            | 4302.05            |
| A_68_P20804630 | chr1:169280208-169280252                          | NM_019993:109             | Aldh9a1       | INSIDE                 | 1.496                                                        | 2.695                          | 2883.49            | 7770.36            | 4.031                          | 2382.36            | 9604.02            |
| A_68_P24098215 | chr5:131915714-131915758                          | NM_177047:1102477         | Auts2         | INSIDE                 | 1.496                                                        | 4.855                          | 1835.06            | 8909.31            | 7.265                          | 1385.90            | 10069.19           |
| A_68_P26018982 | chr8:86773469-86773513                            | NM_001007571:170          | D8ErtD738c    | INSIDE                 | 1.496                                                        | 4.477                          | 3650.41            | 16344.52           | 6.698                          | 2731.43            | 18295.77           |
| A_68_P28291796 | chr12:25516059-25516103                           | NM_001083341:-383         | Mboat2        | PROMOTER               | 1.496                                                        | 2.432                          | 781.87             | 1901.35            | 3.639                          | 595.30             | 2166.22            |
| A_68_P28457433 | chr12:57634159-57634203                           | NM_001146198:1913         | Nkx2-1        | INSIDE                 | 1.496                                                        | 4.586                          | 2023.54            | 9279.60            | 6.859                          | 1756.49            | 12048.05           |
| A_68_P30368658 | chr15:79634975-79635019                           | NM_030689:143             | Nptxr         | INSIDE                 | 1.496                                                        | 1.954                          | 1162.70            | 2271.90            | 2.922                          | 1261.40            | 3686.23            |
| A_68_P32415817 | chrX:58147657-58147701                            | NM_009237:-1073           | Sox3          | PROMOTER               | 1.496                                                        | 4.941                          | 926.43             | 4577.92            | 7.391                          | 691.04             | 5107.77            |
| A_68_P20737712 | chr1:157264214-157264258                          | NM_011273:338             | Xpr1          | INSIDE                 | 1.496                                                        | 1.619                          | 2493.29            | 4035.43            | 2.421                          | 1928.05            | 4667.12            |
| A_68_P31620951 | chr18:36090196-36090240                           |                           |               | Unknown                | 1.496                                                        | 3.298                          | 274.83             | 906.53             | 4.936                          | 237.68             | 1173.16            |
| A_68_P28175452 | chr11:118902740-118902784                         | NM_013926:-535            | Cbx8          | PROMOTER               | 1.495                                                        | 1.563                          | 1619.67            | 2532.11            | 2.337                          | 1329.59            | 3107.83            |
| A_68_P28051744 | chr11:97490870-97490916                           | NM_175332:138             | E130012A19Rik | INSIDE                 | 1.495                                                        | 1.730                          | 541.17             | 936.05             | 2.586                          | 478.99             | 1238.69            |
| A_68_P24613524 | chr6:86992684-86992728                            | NM_013528:-133            | Gfpt1         | PROMOTER               | 1.495                                                        | 2.284                          | 888.58             | 2029.77            | 3.416                          | 884.07             | 3020.06            |

| ProbeName      | Target position of probe on CpG island microarray | TargetID                | GeneSymbol    | CpG island Description | Ratio of relative methylation (TiO <sub>2</sub> -NP/Vehicle) | Sham group                     |                    |                    | TiO <sub>2</sub> -H group      |                    |                    |
|----------------|---------------------------------------------------|-------------------------|---------------|------------------------|--------------------------------------------------------------|--------------------------------|--------------------|--------------------|--------------------------------|--------------------|--------------------|
|                |                                                   |                         |               |                        |                                                              | Relative methylation (Cy5/Cy3) | Cy3 signal (Input) | Cy5 signal (MeDIP) | Relative methylation (Cy5/Cy3) | Cy3 signal (Input) | Cy5 signal (MeDIP) |
| A_68_P30639626 | chr16:30064558-30064602                           | NM_008235-862           | Hes1          | PROMOTER               | 1.495                                                        | 4.123                          | 2347.01            | 9677.81            | 6.166                          | 1933.93            | 11924.39           |
| A_68_P28192109 | chr11:121564851-121564895                         | NM_144797:1132          | Metml         | INSIDE                 | 1.495                                                        | 1.942                          | 2716.65            | 5276.61            | 2.904                          | 1976.74            | 5740.69            |
| A_68_P21495965 | chr2:105516343-105516387                          | NM_013627:-237          | Pax6          | DIVERGENT_PROMOTER     | 1.495                                                        | 1.911                          | 694.64             | 1327.46            | 2.857                          | 606.61             | 1732.91            |
| A_68_P20022046 | chr1:9289451-9289495                              | NM_027671:339           | Sntg1         | INSIDE                 | 1.495                                                        | 1.833                          | 443.34             | 812.55             | 2.740                          | 419.04             | 1148.14            |
| A_68_P24002091 | chr5:114581110-114581154                          | NM_011677:-32           | Ung           | PROMOTER               | 1.495                                                        | 2.127                          | 2054.94            | 4371.54            | 3.181                          | 1704.40            | 5421.67            |
| A_68_P24596101 | chr6:83864271-83864315                            | NM_001166371:-54        | Zfml          | PROMOTER               | 1.495                                                        | 3.231                          | 532.77             | 1721.39            | 4.831                          | 496.47             | 2398.62            |
| A_68_P30849195 | chr16:70314120-70314164                           | NM_028803:-189          | Gbe1          | PROMOTER               | 1.494                                                        | 2.616                          | 1831.98            | 4791.95            | 3.907                          | 1550.72            | 6058.97            |
| A_68_P23322029 | chr4:133843071-133843115                          | NM_001163794:76         | Pdik11        | INSIDE                 | 1.494                                                        | 2.372                          | 10225.48           | 24258.79           | 3.545                          | 8594.51            | 30466.36           |
| A_68_P30423622 | chr15:88998029-88998073                           | NM_001159521:6230       | Plxbn2        | INSIDE                 | 1.494                                                        | 1.877                          | 524.77             | 984.97             | 2.804                          | 429.82             | 1205.04            |
| A_68_P25410469 | chr7:117008961-117009005                          | NM_020052:211           | Scube2        | INSIDE                 | 1.494                                                        | 5.181                          | 868.74             | 4501.01            | 7.739                          | 825.26             | 6386.80            |
| A_68_P28744644 | chr12:112776399-112776444                         | NR_033168:-2735         | Snora28       | PROMOTER               | 1.494                                                        | 3.047                          | 9826.32            | 29943.34           | 4.552                          | 7671.96            | 34924.14           |
| A_68_P27985536 | chr11:85645744-85645788                           | NM_009324:-350          | Tbx2          | PROMOTER               | 1.494                                                        | 1.835                          | 2705.43            | 4964.16            | 2.741                          | 2125.14            | 5824.30            |
| A_68_P27466136 | chr10:114238907-114238951                         | NM_146241:-502          | Trhde         | PROMOTER               | 1.494                                                        | 1.663                          | 869.87             | 1446.85            | 2.485                          | 737.16             | 1832.11            |
| A_68_P20421181 | chr1:89904795-89904839                            | NM_001033291:310        | Usp40         | INSIDE                 | 1.494                                                        | 1.493                          | 776.15             | 1158.90            | 2.231                          | 660.26             | 1473.15            |
| A_68_P30351229 | A_68_P30351229                                    |                         |               | Unknown                | 1.494                                                        | 4.281                          | 1145.52            | 4904.46            | 6.397                          | 1071.97            | 6857.53            |
| A_68_P22262798 | chr3:79091123-79091167                            | AK032506:-169           |               | PROMOTER               | 1.494                                                        | 2.337                          | 1452.04            | 3392.81            | 3.492                          | 1172.92            | 4095.33            |
| A_68_P31161581 | chr17:36034296-36034340                           | NM_001033630:5          | 2310061104Rik | INSIDE                 | 1.493                                                        | 3.516                          | 1094.62            | 3848.68            | 5.249                          | 932.82             | 4895.98            |
| A_68_P21754951 | chr2:153269795-153269839                          | NM_001001986:399        | 8430427H17Rik | INSIDE                 | 1.493                                                        | 1.796                          | 1084.60            | 1948.13            | 2.682                          | 930.08             | 2494.60            |
| A_68_P26890107 | chr9:122478468-122478512                          | NR_015610:-3128         | 9530059014Rik | PROMOTER               | 1.493                                                        | 1.625                          | 802.64             | 1303.97            | 2.425                          | 628.18             | 1523.47            |
| A_68_P28098880 | chr11:105847454-105847498                         | NM_009598:10955         | Ace           | INSIDE                 | 1.493                                                        | 1.549                          | 581.37             | 900.55             | 2.313                          | 444.02             | 1026.80            |
| A_68_P25093839 | chr7:52825720-52825764                            | NM_009737:10            | Beat2         | INSIDE                 | 1.493                                                        | 2.461                          | 1979.07            | 4869.89            | 3.675                          | 1656.09            | 6086.18            |
| A_68_P30433470 | chr15:90880052-90880096                           | NM_001109040:305        | Kif21a        | INSIDE                 | 1.493                                                        | 1.872                          | 1133.72            | 2122.14            | 2.794                          | 984.50             | 2750.42            |
| A_68_P32266422 | chrX:13063296-13063340                            | NM_173415:18521         | Nyx           | INSIDE                 | 1.493                                                        | 2.556                          | 715.31             | 1828.01            | 3.816                          | 512.63             | 1955.93            |
| A_68_P26349531 | chr9:21722321-21722365                            | NM_031874:223           | Rab3d         | INSIDE                 | 1.493                                                        | 2.793                          | 847.44             | 2367.19            | 4.170                          | 739.45             | 3083.42            |
| A_68_P21851412 | chr2:169956064-169956108                          | NM_001033299:634        | Zfp217        | INSIDE                 | 1.493                                                        | 2.203                          | 383.89             | 845.52             | 3.289                          | 346.43             | 1139.56            |
| A_68_P27830382 | chr11:58136668-58136712                           | NM_178761:158           | Zfp672        | INSIDE                 | 1.493                                                        | 1.613                          | 493.52             | 796.12             | 2.408                          | 499.73             | 1203.21            |
| A_68_P24336409 | chr6:31166646-31166691                            | ENSMUST00000115107:1765 |               | INSIDE                 | 1.493                                                        | 2.097                          | 1806.75            | 3789.15            | 3.132                          | 1653.24            | 5178.09            |
| A_68_P23425243 | chr4:152857051-152857095                          | NM_001099299:-133       | Ajap1         | PROMOTER               | 1.492                                                        | 4.288                          | 1661.98            | 7127.39            | 6.399                          | 1493.27            | 9555.03            |
| A_68_P22941965 | chr4:56878080-56878124                            | NM_018761:-19           | Cttnal1       | PROMOTER               | 1.492                                                        | 2.293                          | 10764.22           | 24683.44           | 3.420                          | 7836.12            | 26802.11           |
| A_68_P25010200 | chr7:26180775-26180819                            | NM_010719:210           | Lipe          | INSIDE                 | 1.492                                                        | 2.450                          | 1203.56            | 2948.31            | 3.655                          | 957.61             | 3500.53            |
| A_68_P21742434 | chr2:150864733-150864777                          | NM_026086:361           | Nanp          | INSIDE                 | 1.492                                                        | 3.383                          | 725.58             | 2454.59            | 5.047                          | 652.76             | 3294.63            |
| A_68_P27551122 | chr11:3190063-3190107                             | NM_019574:-375          | Patz1         | PROMOTER               | 1.492                                                        | 3.884                          | 2049.99            | 7961.96            | 5.796                          | 1553.45            | 9004.29            |
| A_68_P21351543 | chr2:76486449-76486493                            | NM_011871:-419          | Prkra         | DIVERGENT_PROMOTER     | 1.492                                                        | 1.899                          | 4446.39            | 8444.13            | 2.833                          | 3396.36            | 9622.74            |
| A_68_P25571665 | chr7:145589754-145589798                          | NM_183289:-363          | Teerg11       | PROMOTER               | 1.492                                                        | 3.210                          | 1121.24            | 3599.02            | 4.789                          | 938.78             | 4496.17            |
| A_68_P32196169 | chr19:55816232-55816276                           | NM_001142918:-45        | Tcf7l2        | PROMOTER               | 1.492                                                        | 3.108                          | 5003.32            | 15550.53           | 4.637                          | 3907.26            | 18118.76           |
| A_68_P23183551 | chr4:105989077-105989121                          | NM_183225:281           | Usp24         | INSIDE                 | 1.492                                                        | 30.482                         | 1090.71            | 33247.34           | 45.472                         | 799.65             | 36361.55           |
| A_68_P27663517 | chr11:26493581-26493625                           | NM_027260:318           | Vrk2          | INSIDE                 | 1.492                                                        | 1.570                          | 1306.37            | 2050.94            | 2.343                          | 1375.56            | 3222.57            |
| A_68_P28739968 | chr12:111976134-111976178                         | NM_027149:-2            | Wdr20a        | PROMOTER               | 1.492                                                        | 1.771                          | 1358.99            | 2406.85            | 2.642                          | 1134.91            | 2998.01            |
| A_68_P21713971 | chr2:145500669-145500713                          | ENSMUST00000144661:-412 |               | PROMOTER               | 1.492                                                        | 3.041                          | 8805.83            | 26779.05           | 4.538                          | 6759.79            | 30676.79           |
| A_68_P32186055 | chr19:54120591-54120635                           | NM_007417:941           | Adra2a        | INSIDE                 | 1.491                                                        | 3.574                          | 745.23             | 2663.79            | 5.331                          | 602.49             | 3211.68            |
| A_68_P20429509 | chr1:91351220-91351264                            | NM_001037136:-143       | Agap1         | PROMOTER               | 1.491                                                        | 2.172                          | 1218.02            | 2645.15            | 3.237                          | 1092.67            | 3536.90            |
| A_68_P20258853 | chr1:58480687-58480731                            | NM_001042634:224        | Clk1          | INSIDE                 | 1.491                                                        | 2.517                          | 965.55             | 2430.58            | 3.754                          | 821.43             | 3083.74            |
| A_68_P30213289 | chr15:51697145-51697189                           | NM_080635:-159          | Eif3h         | PROMOTER               | 1.491                                                        | 4.118                          | 811.57             | 3341.85            | 6.140                          | 689.75             | 4235.10            |
| A_68_P26248326 | chr8:127421066-127421110                          | NM_198103:517           | Excoc8        | INSIDE                 | 1.491                                                        | 2.689                          | 1459.41            | 3923.64            | 4.010                          | 1160.08            | 4651.42            |
| A_68_P27556420 | chr11:4118164-4118208                             | NM_028022:-67           | Gatsl3        | PROMOTER               | 1.491                                                        | 3.351                          | 3994.43            | 13386.75           | 4.999                          | 3124.31            | 15616.92           |
| A_68_P20417068 | chr1:89223852-89223896                            | NM_001110212:271        | Gigyf2        | INSIDE                 | 1.491                                                        | 5.680                          | 1362.29            | 7738.35            | 8.472                          | 1230.82            | 10427.60           |
| A_68_P23627551 | chr5:40035622-40035667                            | NM_010474:226           | Hs3st1        | INSIDE                 | 1.491                                                        | 2.146                          | 4082.80            | 8763.09            | 3.201                          | 3300.09            | 10564.46           |
| A_68_P24325224 | chr6:29162351-29162395                            | NM_011829:-101          | Impdh1        | PROMOTER               | 1.491                                                        | 3.611                          | 2888.66            | 10432.29           | 5.386                          | 2362.75            | 12725.29           |
| A_68_P22530123 | chr3:130809073-130809117                          | NM_010703:-4294         | Lef1          | PROMOTER               | 1.491                                                        | 13.626                         | 995.20             | 13560.91           | 20.319                         | 868.75             | 17651.82           |
| A_68_P32565868 | chrX:99044658-99044702                            | NM_001163610:-43        | Nhs12         | PROMOTER               | 1.491                                                        | 3.614                          | 1420.71            | 5134.02            | 5.386                          | 897.42             | 4833.88            |
| A_68_P31067738 | chr17:15963543-15963587                           | NM_178615:-14           | Rgmb          | PROMOTER               | 1.491                                                        | 2.517                          | 8925.03            | 22468.51           | 3.753                          | 6475.95            | 24302.21           |

| ProbeName       | Target position of probe on CpG island microarray | TargetID                | GeneSymbol    | CpG island Description | Ratio of relative methylation (TiO <sub>2</sub> -NP/Vehicle) | Sham group                     |                    |                    | TiO <sub>2</sub> -H group      |                    |                    |
|-----------------|---------------------------------------------------|-------------------------|---------------|------------------------|--------------------------------------------------------------|--------------------------------|--------------------|--------------------|--------------------------------|--------------------|--------------------|
|                 |                                                   |                         |               |                        |                                                              | Relative methylation (Cy5/Cy3) | Cy3 signal (Input) | Cy5 signal (MeDIP) | Relative methylation (Cy5/Cy3) | Cy3 signal (Input) | Cy5 signal (MeDIP) |
| A_68_P24127573  | chr5:138228997-138229041                          | NM_001005426-11         | Zcwpw1        | DIVERGENT_PROMOTER     | 1.491                                                        | 1.562                          | 697.44             | 1089.17            | 2.329                          | 617.84             | 1438.97            |
| A_68_P225959077 | chr8:74446861-74446905                            | NM_133358:159           | Zfp617        | INSIDE                 | 1.491                                                        | 5.588                          | 2263.07            | 12647.16           | 8.330                          | 1860.47            | 15498.50           |
| A_68_P31256671  | chr17:56651263-56651307                           | NM_011483:622           | Znrf4         | INSIDE                 | 1.491                                                        | 3.365                          | 1288.91            | 4337.82            | 5.019                          | 1098.38            | 5513.26            |
| A_68_P29527055  | A_68_P29527055                                    | Unknown                 | Unknown       | Unknown                | 1.491                                                        | 3.497                          | 196.73             | 687.87             | 5.214                          | 153.74             | 801.59             |
| A_68_P28743060  | chr12:112512501-112512545                         | NM_033603:3201          | Amn           | INSIDE                 | 1.490                                                        | 1.423                          | 7033.05            | 10010.01           | 2.121                          | 5389.09            | 11430.75           |
| A_68_P22860481  | chr4:41045310-41045354                            | NM_016689:-116          | Aqp3          | PROMOTER               | 1.490                                                        | 4.660                          | 1305.12            | 6081.64            | 6.945                          | 1101.64            | 7650.92            |
| A_68_P27849285  | chr11:61393132-61393176                           | NM_010148:-1            | Epn2          | PROMOTER               | 1.490                                                        | 2.945                          | 2245.53            | 6613.71            | 4.388                          | 1779.36            | 7807.81            |
| A_68_P25616728  | chr8:4238821-4238865                              | NM_001042557:103        | Map2k7        | INSIDE                 | 1.490                                                        | 1.822                          | 1137.79            | 2072.92            | 2.715                          | 1027.75            | 2790.18            |
| A_68_P24536650  | chr6:71444353-71444397                            | NM_009543:487           | Rnf103        | INSIDE                 | 1.490                                                        | 1.806                          | 1872.30            | 3381.13            | 2.691                          | 1641.75            | 4418.32            |
| A_68_P22342531  | chr3:94964250-94964300                            | NM_011351:-4021         | Sema6c        | PROMOTER               | 1.490                                                        | 4.451                          | 357.82             | 1592.58            | 6.634                          | 354.91             | 2354.44            |
| A_68_P26596714  | chr9:66891475-66891519                            | NM_001164252:182        | Tpm1          | INSIDE                 | 1.490                                                        | 2.510                          | 900.44             | 2260.05            | 3.741                          | 720.21             | 2694.31            |
| A_68_P30826541  | chr16:65815730-65815774                           | NM_028572:-125          | Vgll3         | PROMOTER               | 1.490                                                        | 3.059                          | 712.43             | 2179.14            | 4.557                          | 617.08             | 2811.93            |
| A_68_P24850992  | chr6:131383975-131384019                          | Unknown                 | Unknown       | Unknown                | 1.490                                                        | 2.161                          | 1306.32            | 2823.15            | 3.221                          | 1119.61            | 3605.74            |
| A_68_P22630569  | chr3:148652119-148652163                          | ENSMUST00000098518:140  | Unknown       | INSIDE                 | 1.490                                                        | 1.650                          | 1457.29            | 2405.23            | 2.459                          | 1295.15            | 3185.08            |
| A_68_P25027724  | chr7:30303544-30303588                            | ENSMUST00000141713:-657 | Unknown       | PROMOTER               | 1.490                                                        | 1.774                          | 1239.78            | 2198.95            | 2.644                          | 1094.62            | 2893.71            |
| A_68_P30558454  | chr16:13672209-13672253                           | NM_025653:118           | 3110001I22Rik | INSIDE                 | 1.489                                                        | 2.198                          | 1853.67            | 4074.40            | 3.272                          | 1443.14            | 4721.77            |
| A_68_P25525515  | chr7:138080197-138080241                          | NM_019564:502           | Htra1         | INSIDE                 | 1.489                                                        | 1.895                          | 1370.52            | 2597.52            | 2.823                          | 1195.46            | 3374.46            |
| A_68_P30585934  | chr16:20097708-20097752                           | NM_029436:104           | Klhl24        | INSIDE                 | 1.489                                                        | 2.283                          | 662.18             | 1512.05            | 3.399                          | 645.27             | 2193.26            |
| A_68_P25018407  | chr7:28442995-28443039                            | NM_001081292:16601      | Map3k10       | INSIDE                 | 1.489                                                        | 5.153                          | 1305.66            | 6727.86            | 7.673                          | 1031.07            | 7911.18            |
| A_68_P23331869  | chr4:135609312-135609356                          | NM_025919:-48           | Rpl11         | PROMOTER               | 1.489                                                        | 3.002                          | 1260.15            | 3783.48            | 4.469                          | 1027.83            | 4593.88            |
| A_68_P24158560  | chr5:144670456-144670500                          | NM_001172146:230        | Aimp2         | INSIDE                 | 1.488                                                        | 5.856                          | 2490.98            | 14587.44           | 8.716                          | 2174.48            | 18953.42           |
| A_68_P23818500  | chr5:77286506-77286550                            | NM_001163793:16905      | C530008M17Rik | INSIDE                 | 1.488                                                        | 6.205                          | 7896.04            | 48992.45           | 9.233                          | 4990.86            | 46079.35           |
| A_68_P22524273  | chr3:129883661-129883705                          | NM_029838:-113          | Col25a1       | PROMOTER               | 1.488                                                        | 6.654                          | 699.40             | 4653.89            | 9.988                          | 635.72             | 6292.63            |
| A_68_P21428537  | chr2:92273951-92273995                            | NM_009963:254           | Cry2          | INSIDE                 | 1.488                                                        | 1.459                          | 782.43             | 1141.89            | 2.172                          | 670.94             | 1457.25            |
| A_68_P32383357  | chrX:49965510-49965554                            | NM_016697:1619          | Gpc3          | INSIDE                 | 1.488                                                        | 2.556                          | 704.94             | 1801.58            | 3.802                          | 445.28             | 1693.02            |
| A_68_P27271929  | chr10:77531813-77531858                           | NM_015790:-277          | Icosl         | PROMOTER               | 1.488                                                        | 2.482                          | 1296.29            | 3217.58            | 3.694                          | 1047.40            | 3868.77            |
| A_68_P20639346  | chr1:137327066-137327110                          | NM_153774:-20           | Ipo9          | PROMOTER               | 1.488                                                        | 1.519                          | 815.68             | 1238.76            | 2.259                          | 767.03             | 1732.96            |
| A_68_P26531872  | chr9:55390256-55390300                            | NM_027397:1323          | Isl2          | INSIDE                 | 1.488                                                        | 4.671                          | 1085.66            | 5070.71            | 6.951                          | 978.25             | 6799.90            |
| A_68_P25948235  | chr8:72356375-72356419                            | NM_001024954:-206       | Pbx4          | PROMOTER               | 1.488                                                        | 1.638                          | 680.46             | 1114.66            | 2.438                          | 581.17             | 1416.90            |
| A_68_P26011770  | chr8:85388368-85388412                            | NM_177378:1136          | Rnf150        | INSIDE                 | 1.488                                                        | 3.080                          | 1079.30            | 3324.26            | 4.583                          | 970.72             | 4448.36            |
| A_68_P24769162  | chr6:115085438-115085482                          | NM_013681:541           | Syn2          | INSIDE                 | 1.488                                                        | 4.224                          | 615.78             | 2600.91            | 6.283                          | 470.27             | 2954.76            |
| A_68_P24760941  | chr6:113647011-113647055                          | NM_001033463:-460       | Tatdn2        | PROMOTER               | 1.488                                                        | 2.222                          | 1072.54            | 2383.67            | 3.307                          | 953.60             | 3153.27            |
| A_68_P27886201  | chr11:67735651-67735695                           | NM_173754:-17           | Usp43         | PROMOTER               | 1.488                                                        | 2.241                          | 486.73             | 1090.62            | 3.334                          | 360.25             | 1201.16            |
| A_68_P20737716  | chr1:157264675-157264719                          | NM_011273:-122          | Xpr1          | PROMOTER               | 1.488                                                        | 2.422                          | 1335.19            | 3233.80            | 3.603                          | 1135.65            | 4091.66            |
| A_68_P25614202  | chr8:3492951-3492995                              | NM_080461:-165          | Zfp358        | PROMOTER               | 1.488                                                        | 1.596                          | 6033.02            | 9628.47            | 2.375                          | 4331.43            | 10288.39           |
| A_68_P26349677  | chr9:21748879-21748923                            | NM_144935:6183          | BC018242      | INSIDE                 | 1.487                                                        | 3.028                          | 3130.24            | 9478.02            | 4.502                          | 2573.97            | 11588.81           |
| A_68_P25601080  | chr7:150646296-150646340                          | NM_001161624:637        | Cdkn1c        | INSIDE                 | 1.487                                                        | 4.382                          | 1274.18            | 5583.61            | 6.515                          | 1004.83            | 6546.13            |
| A_68_P227849286 | chr11:61393305-61393349                           | NM_010148:-173          | Epn2          | PROMOTER               | 1.487                                                        | 4.727                          | 4819.02            | 22780.15           | 7.029                          | 3257.06            | 22894.05           |
| A_68_P23356930  | chr4:139802256-139802300                          | NM_198610:448           | Igfb2l1       | INSIDE                 | 1.487                                                        | 2.045                          | 786.67             | 1608.36            | 3.041                          | 607.76             | 1848.19            |
| A_68_P21389130  | chr2:83564617-83564661                            | NM_008402:85            | Igfbp1        | INSIDE                 | 1.487                                                        | 2.157                          | 1205.50            | 2600.52            | 3.207                          | 1076.10            | 3451.24            |
| A_68_P31120666  | chr17:28279127-28279172                           | NM_001004366:-321       | Scube3        | PROMOTER               | 1.487                                                        | 1.332                          | 5679.82            | 7564.81            | 1.981                          | 3576.07            | 7084.14            |
| A_68_P22383782  | chr3:102799932-102799976                          | NM_025679:292           | Sike1         | INSIDE                 | 1.487                                                        | 2.904                          | 3165.15            | 9192.18            | 4.317                          | 2396.96            | 10348.20           |
| A_68_P31301690  | chr17:65963450-65963494                           | NM_013933:-577          | Vapa          | PROMOTER               | 1.487                                                        | 8.798                          | 1010.79            | 8893.14            | 13.087                         | 685.67             | 8973.47            |
| A_68_P23296941  | chr4:129177909-129177953                          | NM_001085491:9497       | 1700125D06Rik | DOWNSTREAM             | 1.486                                                        | 2.494                          | 959.72             | 2393.20            | 3.705                          | 822.00             | 3045.18            |
| A_68_P23956783  | chr5:106128691-106128735                          | NM_001122768:-275       | Lrrc8d        | PROMOTER               | 1.486                                                        | 1.842                          | 1832.21            | 3375.58            | 2.737                          | 1481.10            | 4053.61            |
| A_68_P20640400  | chr1:137481754-137481798                          | NM_173437:156           | Nav1          | INSIDE                 | 1.486                                                        | 1.516                          | 848.35             | 1286.26            | 2.253                          | 795.55             | 1792.57            |
| A_68_P31112710  | chr17:26976655-26976699                           | NM_008700:1834          | Nkx2-5        | INSIDE                 | 1.486                                                        | 2.074                          | 1893.57            | 3926.91            | 3.082                          | 1586.57            | 4890.57            |
| A_68_P26135469  | chr8:108225412-108225456                          | NM_001047435:-114       | Pard6a        | PROMOTER               | 1.486                                                        | 3.119                          | 449.62             | 1402.26            | 4.634                          | 385.94             | 1788.30            |
| A_68_P24338524  | chr6:31513799-31513843                            | NM_013723:117           | Podxl         | INSIDE                 | 1.486                                                        | 1.746                          | 769.41             | 1343.69            | 2.595                          | 715.71             | 1856.99            |
| A_68_P31102167  | chr17:25325180-25325224                           | NM_001197024:-142       | Unkl          | PROMOTER               | 1.486                                                        | 2.798                          | 921.18             | 2577.58            | 4.159                          | 811.41             | 3374.68            |
| A_68_P28746261  | chr12:113052815-113052859                         | NM_026752:456           | Zfyve21       | INSIDE                 | 1.486                                                        | 3.714                          | 1302.12            | 4836.52            | 5.520                          | 1086.85            | 5999.50            |

| ProbeName      | Target position of probe on CpG island microarray | TargetID               | GeneSymbol    | CpG island Description | Ratio of relative methylation (TiO <sub>2</sub> -NP/Vehicle) | Sham group                     |                    |                    | TiO <sub>2</sub> -H group      |                    |                    |
|----------------|---------------------------------------------------|------------------------|---------------|------------------------|--------------------------------------------------------------|--------------------------------|--------------------|--------------------|--------------------------------|--------------------|--------------------|
|                |                                                   |                        |               |                        |                                                              | Relative methylation (Cy5/Cy3) | Cy3 signal (Input) | Cy5 signal (MeDIP) | Relative methylation (Cy5/Cy3) | Cy3 signal (Input) | Cy5 signal (MeDIP) |
| A_68_P28168166 | chr11:117811203-117811247                         |                        |               | Unknown                | 1.486                                                        | 1.853                          | 1410.42            | 2613.60            | 2.754                          | 1231.53            | 3391.73            |
| A_68_P27633195 | chr11:20640941-20640985                           | NM_181411:525          | Aflph         | INSIDE                 | 1.485                                                        | 6.232                          | 1309.64            | 8162.06            | 9.254                          | 1017.41            | 9415.47            |
| A_68_P25188282 | chr7:73572179-73572223                            | NM_053080:163          | Aldh1a3       | INSIDE                 | 1.485                                                        | 1.775                          | 482.69             | 856.84             | 2.636                          | 411.20             | 1083.82            |
| A_68_P32244416 | chrX:8469520-8469564                              | NM_175327:64           | B630019K06Rik | INSIDE                 | 1.485                                                        | 3.190                          | 515.88             | 1645.62            | 4.736                          | 267.16             | 1265.36            |
| A_68_P31756138 | chr18:61336272-61336316                           | NM_178277:409          | Hmgxb3        | INSIDE                 | 1.485                                                        | 1.870                          | 2277.30            | 4258.67            | 2.777                          | 1653.25            | 4591.76            |
| A_68_P28041916 | chr11:95867049-95867093                           | NM_009951:188          | Igf2bp1       | INSIDE                 | 1.485                                                        | 2.030                          | 1304.20            | 2646.88            | 3.014                          | 1157.60            | 3488.96            |
| A_68_P22509730 | chr3:127336734-127336778                          | NM_009718:694          | Neurog2       | INSIDE                 | 1.485                                                        | 5.671                          | 1068.27            | 6058.09            | 8.419                          | 859.81             | 7239.13            |
| A_68_P23361259 | chr4:140517609-140517653                          | NM_023374:445          | Sdhib         | INSIDE                 | 1.485                                                        | 5.325                          | 986.50             | 5253.58            | 7.911                          | 849.33             | 6718.97            |
| A_68_P26932996 | chr10:9621066-9621110                             | NM_001081344:-250      | Stxbp5        | PROMOTER               | 1.485                                                        | 2.612                          | 314.38             | 821.25             | 3.879                          | 442.32             | 1715.69            |
| A_68_P28078912 | chr11:102180945-102180990                         | NM_011551:-557         | Ubtf          | PROMOTER               | 1.485                                                        | 1.841                          | 1467.58            | 2701.44            | 2.733                          | 1097.83            | 3000.03            |
| A_68_P31839441 | chr18:75980377-75980421                           | NM_145356:567          | Zbtb7c        | INSIDE                 | 1.485                                                        | 1.935                          | 940.22             | 1819.10            | 2.874                          | 811.86             | 2333.14            |
| A_68_P30331748 | chr15:73475653-73475697                           | ENSMUST00000150409:101 |               | INSIDE                 | 1.485                                                        | 5.345                          | 5095.75            | 27234.62           | 7.939                          | 3654.55            | 29013.70           |
| A_68_P22789806 | chr4:25208898-25208942                            | NM_026194:48           | 1810074P20Rik | INSIDE                 | 1.484                                                        | 1.911                          | 1480.86            | 2829.19            | 2.836                          | 1269.09            | 3598.53            |
| A_68_P23607908 | chr5:36827600-36827644                            | NM_025725:386          | Ccdc96        | INSIDE                 | 1.484                                                        | 5.235                          | 2489.82            | 13033.21           | 7.770                          | 1941.17            | 15083.03           |
| A_68_P26168095 | chr8:113917768-113917812                          | NM_178086:-69          | Fa2h          | PROMOTER               | 1.484                                                        | 6.080                          | 1257.89            | 7648.54            | 9.026                          | 1008.97            | 9106.88            |
| A_68_P27497681 | chr10:119914095-119914139                         | NM_010441:-125         | Hmga2         | PROMOTER               | 1.484                                                        | 2.135                          | 2093.43            | 4468.85            | 3.168                          | 1657.10            | 5250.27            |
| A_68_P30267513 | chr15:61816737-61816781                           | NM_001177352:-137      | Myc           | PROMOTER               | 1.484                                                        | 3.242                          | 3790.60            | 12290.28           | 4.810                          | 2991.79            | 14391.14           |
| A_68_P26024229 | chr8:87823886-87823930                            | NM_001163791:378       | Orc6          | INSIDE                 | 1.484                                                        | 5.626                          | 1217.96            | 6852.12            | 8.349                          | 978.99             | 8173.95            |
| A_68_P30139531 | chr15:36539130-36539174                           | NM_008774:-424         | Pabpc1        | PROMOTER               | 1.484                                                        | 2.124                          | 1105.00            | 2347.11            | 3.151                          | 925.10             | 2915.31            |
| A_68_P22129906 | chr3:51287666-51287710                            | NM_016858:-199         | Rab33b        | PROMOTER               | 1.484                                                        | 3.575                          | 3179.94            | 11369.76           | 5.304                          | 2674.89            | 14188.17           |
| A_68_P28051170 | chr11:97396005-97396049                           | NM_018873:40414        | Srecl1        | INSIDE                 | 1.484                                                        | 2.729                          | 1143.80            | 3121.76            | 4.052                          | 991.18             | 4015.84            |
| A_68_P22411406 | chr3:108029457-108029501                          | NM_008596:39           | Sypl2         | INSIDE                 | 1.484                                                        | 2.930                          | 2603.75            | 7628.82            | 4.348                          | 1948.88            | 8474.21            |
| A_68_P30497401 | chr15:102180872-102180916                         | NM_153416:296          | Aaas          | INSIDE                 | 1.483                                                        | 1.718                          | 4393.93            | 7547.58            | 2.548                          | 3456.38            | 8806.91            |
| A_68_P27255925 | chr10:74779618-74779662                           | NM_009630:-47          | Adora2a       | PROMOTER               | 1.483                                                        | 2.081                          | 3518.28            | 7321.57            | 3.086                          | 2975.00            | 9180.44            |
| A_68_P28533193 | chr12:73765645-73765689                           | NM_025522:149          | Dhrs7         | INSIDE                 | 1.483                                                        | 1.684                          | 1131.18            | 1904.55            | 2.498                          | 939.62             | 2346.87            |
| A_68_P28669125 | chr12:99497683-99497727                           | NM_008079:-157         | Galc          | DIVERGENT_PROMOTER     | 1.483                                                        | 2.241                          | 1222.21            | 2738.64            | 3.322                          | 1049.95            | 3488.01            |
| A_68_P23756018 | chr5:65771113-65771157                            | NM_031180:31485        | Klb           | INSIDE                 | 1.483                                                        | 4.473                          | 1280.38            | 5727.59            | 6.635                          | 1092.86            | 7251.53            |
| A_68_P31731698 | chr18:56867506-56867550                           | NM_010721:62           | Lmnb1         | INSIDE                 | 1.483                                                        | 1.891                          | 1001.30            | 1893.37            | 2.804                          | 868.82             | 2436.10            |
| A_68_P26991379 | chr10:20879243-20879287                           | NM_001198914:1526      | Myb           | INSIDE                 | 1.483                                                        | 4.136                          | 1333.68            | 5516.51            | 6.135                          | 1248.56            | 7659.30            |
| A_68_P22325410 | chr3:90270013-90270057                            | NM_008727:-246         | Npr1          | PROMOTER               | 1.483                                                        | 2.568                          | 1376.39            | 3535.17            | 3.809                          | 1090.25            | 4152.71            |
| A_68_P20876659 | chr1:182498959-182499003                          | NM_007415:-125         | Parp1         | PROMOTER               | 1.483                                                        | 5.070                          | 2443.18            | 12386.49           | 7.518                          | 1978.81            | 14877.19           |
| A_68_P27838986 | chr11:59600830-59600874                           | NM_183139:307          | Pld6          | INSIDE                 | 1.483                                                        | 2.031                          | 820.37             | 1665.86            | 3.011                          | 692.96             | 2086.64            |
| A_68_P29419901 | chr14:14953551-14953595                           | NM_025550:-154         | Psmc6         | PROMOTER               | 1.483                                                        | 5.375                          | 1361.25            | 7316.32            | 7.971                          | 1043.09            | 8314.32            |
| A_68_P27554683 | chr11:3813912-3813956                             | NM_153142:733          | Slc35e4       | INSIDE                 | 1.483                                                        | 3.181                          | 5584.46            | 17766.24           | 4.718                          | 4111.19            | 19396.84           |
| A_68_P28183961 | chr11:120209795-120209839                         | NM_009609:-18          | Actg1         | DIVERGENT_PROMOTER     | 1.482                                                        | 4.193                          | 1639.68            | 6875.37            | 6.213                          | 1414.71            | 8790.24            |
| A_68_P30284258 | chr15:64753242-64753286                           | NM_009623:594          | Adcy8         | INSIDE                 | 1.482                                                        | 2.953                          | 6285.38            | 18562.99           | 4.376                          | 4889.33            | 21396.26           |
| A_68_P24950090 | chr7:4658912-4658956                              | NM_001003920:16405     | Brsk1         | INSIDE                 | 1.482                                                        | 2.699                          | 4374.20            | 11806.01           | 4.000                          | 3848.05            | 15392.56           |
| A_68_P27227733 | chr10:69559705-69559749                           | NM_001111121:-142      | Ccdc6         | PROMOTER               | 1.482                                                        | 5.110                          | 3870.06            | 19777.68           | 7.576                          | 2600.34            | 19699.88           |
| A_68_P23980414 | chr5:110973587-110973631                          | NM_198306:245          | Galnt9        | INSIDE                 | 1.482                                                        | 4.093                          | 1922.29            | 7867.08            | 6.063                          | 1572.34            | 9533.56            |
| A_68_P22301527 | chr3:86028160-86028204                            | NM_001077687:-429      | Lrba          | PROMOTER               | 1.482                                                        | 1.595                          | 746.77             | 1190.92            | 2.363                          | 658.90             | 1556.83            |
| A_68_P25995588 | chr8:82163767-82163811                            | NM_001081164:214       | Otud4         | INSIDE                 | 1.482                                                        | 3.426                          | 421.02             | 1442.45            | 5.079                          | 366.04             | 1859.13            |
| A_68_P28238663 | chr12:11462730-11462774                           | NM_001111118:-132      | Rad51ap2      | PROMOTER               | 1.482                                                        | 2.658                          | 3232.76            | 8594.13            | 3.940                          | 2793.60            | 11007.71           |
| A_68_P20233544 | chr1:53842063-53842107                            | NM_133810:-25          | Stk17b        | PROMOTER               | 1.482                                                        | 1.878                          | 2289.72            | 4300.75            | 2.784                          | 1885.34            | 5248.64            |
| A_68_P24951873 | chr7:5014151-5014195                              | NM_001205231:428       | U2af2         | INSIDE                 | 1.482                                                        | 3.304                          | 2306.57            | 7620.07            | 4.897                          | 1919.29            | 9399.65            |
| A_68_P26529570 | chr9:54996803-54996847                            | NM_180600:-351         | Ube2q2        | PROMOTER               | 1.482                                                        | 2.667                          | 1031.63            | 2750.92            | 3.953                          | 925.31             | 3657.95            |
| A_68_P27475464 | chr10:115855274-115855318                         | NR_028107:120          | 1700058G18Rik | INSIDE                 | 1.481                                                        | 4.934                          | 292.58             | 1443.64            | 7.307                          | 244.85             | 1789.09            |
| A_68_P27958482 | chr1:80967088-80967132                            | NM_007384:-705         | Accn1         | PROMOTER               | 1.481                                                        | 4.388                          | 962.52             | 4223.79            | 6.500                          | 813.40             | 5287.31            |
| A_68_P20753949 | chr1:160293080-160293124                          | NM_001205204:668       | Astn1         | INSIDE                 | 1.481                                                        | 1.918                          | 5761.52            | 11049.78           | 2.840                          | 4203.78            | 11939.94           |
| A_68_P25272112 | chr7:88599818-88599862                            | NM_007755:-278         | Cpeb1         | PROMOTER               | 1.481                                                        | 2.359                          | 1025.11            | 2418.14            | 3.493                          | 831.90             | 2905.84            |
| A_68_P32219567 | chr19:59533292-59533336                           | NM_010132:135          | Emx2          | INSIDE                 | 1.481                                                        | 1.925                          | 451.55             | 869.14             | 2.851                          | 413.29             | 1178.37            |
| A_68_P32383368 | chrX:49966913-49966957                            | NM_016697:217          | Gpc3          | INSIDE                 | 1.481                                                        | 2.480                          | 1551.13            | 3847.02            | 3.674                          | 1061.86            | 3901.58            |

| ProbeName      | Target position of probe on CpG island microarray | TargetID                | GeneSymbol    | CpG island Description | Ratio of relative methylation (TiO <sub>2</sub> -NP/Vehicle) | Sham group                     |                    |                    | TiO <sub>2</sub> -H group      |                    |                    |
|----------------|---------------------------------------------------|-------------------------|---------------|------------------------|--------------------------------------------------------------|--------------------------------|--------------------|--------------------|--------------------------------|--------------------|--------------------|
|                |                                                   |                         |               |                        |                                                              | Relative methylation (Cy5/Cy3) | Cy3 signal (Input) | Cy5 signal (MeDIP) | Relative methylation (Cy5/Cy3) | Cy3 signal (Input) | Cy5 signal (MeDIP) |
| A_68_P23361559 | chr4:140566637-140566681                          | NM_008546:107           | Mfap2         | INSIDE                 | 1.481                                                        | 1.545                          | 1918.29            | 2964.27            | 2.289                          | 1684.65            | 3855.41            |
| A_68_P24132976 | chr5:139471493-139471537                          | NM_008808:-607          | Pdgfa         | PROMOTER               | 1.481                                                        | 4.271                          | 882.01             | 3766.82            | 6.325                          | 815.04             | 5155.40            |
| A_68_P29578866 | chr14:47501811-47501855                           | NM_001037221:-807       | Samd4         | PROMOTER               | 1.481                                                        | 3.095                          | 2088.77            | 6465.44            | 4.585                          | 1551.32            | 7112.98            |
| A_68_P22413523 | chr3:108394473-108394517                          | NM_181400:299           | Wdr47         | INSIDE                 | 1.481                                                        | 1.823                          | 830.50             | 1513.68            | 2.700                          | 719.16             | 1941.53            |
| A_68_P30387966 | chr15:83197892-83197936                           | NR_027980:-187          | 1700001L05Rik | PROMOTER               | 1.480                                                        | 3.809                          | 1597.10            | 6083.53            | 5.638                          | 1346.38            | 7590.37            |
| A_68_P27945542 | chr11:78639981-78640025                           | NM_001076681:-94        | 1810012P15Rik | PROMOTER               | 1.480                                                        | 1.923                          | 2346.71            | 4511.92            | 2.846                          | 2058.79            | 5859.47            |
| A_68_P25952417 | chr8:73047003-73047047                            | NM_029366:55            | 2810422J05Rik | INSIDE                 | 1.480                                                        | 1.630                          | 1050.66            | 1712.07            | 2.411                          | 849.65             | 2048.77            |
| A_68_P31776707 | chr18:64820614-64820658                           | NM_001001488:18         | Atp8b1        | INSIDE                 | 1.480                                                        | 2.527                          | 709.08             | 1791.99            | 3.740                          | 629.48             | 2354.57            |
| A_68_P29005199 | chr13:46059825-46059869                           | NM_009124:499           | Atxn1         | INSIDE                 | 1.480                                                        | 4.210                          | 1091.25            | 4593.78            | 6.230                          | 913.47             | 5690.97            |
| A_68_P24476446 | chr6:56664815-56664859                            | NM_030235:-62           | Avl9          | PROMOTER               | 1.480                                                        | 3.367                          | 2391.78            | 8053.22            | 4.982                          | 1936.96            | 9649.44            |
| A_68_P26119098 | chr8:105308180-105308224                          | NM_009866:809           | Cdh11         | INSIDE                 | 1.480                                                        | 2.061                          | 8473.02            | 17463.92           | 3.049                          | 6293.29            | 19191.28           |
| A_68_P26898893 | chr10:31349339-3134983                            | NM_172546:657           | Cnksr3        | INSIDE                 | 1.480                                                        | 2.790                          | 3564.58            | 9944.12            | 4.129                          | 2849.51            | 11766.46           |
| A_68_P21769580 | chr2:155937622-155937666                          | NM_170588:57            | Cpne1         | INSIDE                 | 1.480                                                        | 2.533                          | 6122.06            | 15507.23           | 3.748                          | 4655.04            | 17448.24           |
| A_68_P22318791 | chr3:89154152-89154197                            | NM_029974:14987         | Dest1         | INSIDE                 | 1.480                                                        | 2.249                          | 710.24             | 1597.59            | 3.330                          | 619.90             | 2064.17            |
| A_68_P20140950 | chr1:34899440-34899484                            | NM_001160235:433        | Fam168b       | INSIDE                 | 1.480                                                        | 2.391                          | 1108.36            | 2650.23            | 3.539                          | 877.79             | 3106.40            |
| A_68_P24784008 | chr6:117867198-117867242                          | NM_001166427:-91        | Hnrnpf        | PROMOTER               | 1.480                                                        | 2.749                          | 2925.73            | 8044.26            | 4.068                          | 2294.90            | 9336.79            |
| A_68_P29616398 | chr14:55732626-55732670                           | NM_177049:3124          | Jph4          | INSIDE                 | 1.480                                                        | 1.870                          | 926.03             | 1731.65            | 2.767                          | 721.71             | 1996.85            |
| A_68_P31552995 | chr18:23197987-23198031                           | NM_001161483:-844       | Nol4          | PROMOTER               | 1.480                                                        | 2.708                          | 3982.48            | 10782.62           | 4.006                          | 3148.81            | 12614.76           |
| A_68_P28151868 | chr11:115048748-115048792                         | NM_001033393:-30        | Tmem104       | DIVERGENT_PROMOTER     | 1.480                                                        | 3.488                          | 3588.34            | 12515.17           | 5.162                          | 3236.22            | 16706.76           |
| A_68_P30366258 | chr15:79233359-79233403                           | NM_172608:353           | Tmem184b      | INSIDE                 | 1.480                                                        | 2.133                          | 1972.86            | 4207.76            | 3.156                          | 1659.57            | 5236.82            |
| A_68_P20405965 | chr1:84835584-84835628                            | NM_133975:273           | Trip12        | INSIDE                 | 1.480                                                        | 2.436                          | 1733.53            | 4222.22            | 3.606                          | 1450.76            | 5230.82            |
| A_68_P25355272 | chr7:105509671-105509715                          | NM_001024619:106        | Tsku          | INSIDE                 | 1.480                                                        | 1.578                          | 789.68             | 1245.92            | 2.335                          | 720.02             | 1681.44            |
| A_68_P27910155 | chr11:72021079-72021123                           | NM_026559:45            | Txndc17       | INSIDE                 | 1.480                                                        | 1.464                          | 1165.15            | 1705.59            | 2.167                          | 977.40             | 2117.86            |
| A_68_P27554559 | chr11:3794810-3794858                             | NM_026150:295           | 4921536K21Rik | INSIDE                 | 1.479                                                        | 1.995                          | 823.65             | 1642.99            | 2.950                          | 659.99             | 1946.71            |
| A_68_P25645835 | chr8:9977887-9977931                              | NM_001081119:192        | Abhd13        | INSIDE                 | 1.479                                                        | 8.814                          | 857.51             | 7558.11            | 13.035                         | 763.22             | 9948.28            |
| A_68_P31759814 | chr18:61946393-61946437                           | NM_178928:-98           | Afap111       | PROMOTER               | 1.479                                                        | 2.041                          | 3425.45            | 6990.74            | 3.018                          | 3032.52            | 9153.63            |
| A_68_P26818180 | chr9:108984801-108984845                          | NM_183250:73            | Ccdc72        | INSIDE                 | 1.479                                                        | 1.486                          | 6981.24            | 10376.87           | 2.199                          | 5026.10            | 11050.19           |
| A_68_P28914111 | chr13:29947064-29947108                           | NM_144536:371           | Cdkal1        | INSIDE                 | 1.479                                                        | 3.371                          | 944.34             | 3183.75            | 4.986                          | 929.45             | 4633.90            |
| A_68_P31715218 | chr18:53904131-53904175                           | NM_178686:49            | Cep120        | INSIDE                 | 1.479                                                        | 1.731                          | 2423.12            | 4193.44            | 2.560                          | 1996.83            | 5112.27            |
| A_68_P31101001 | chr17:25151361-25151405                           | NM_020608:793           | Cramp11       | INSIDE                 | 1.479                                                        | 2.667                          | 3775.30            | 10067.56           | 3.943                          | 3133.13            | 12353.35           |
| A_68_P24620316 | chr6:88143988-88144032                            | NM_008090:-4647         | Gata2         | PROMOTER               | 1.479                                                        | 3.030                          | 1870.87            | 5668.13            | 4.480                          | 1565.73            | 7013.72            |
| A_68_P24862663 | chr6:134582475-134582519                          | NM_026345:10            | Mansc1        | INSIDE                 | 1.479                                                        | 3.308                          | 1719.31            | 5688.01            | 4.892                          | 1484.89            | 7264.64            |
| A_68_P24894482 | chr6:140372882-140372926                          | NM_144920:285           | Plekha5       | INSIDE                 | 1.479                                                        | 1.478                          | 786.61             | 1162.51            | 2.186                          | 680.70             | 1488.20            |
| A_68_P22321898 | chr3:89634943-89634987                            | NM_172530:-327          | She           | PROMOTER               | 1.479                                                        | 2.768                          | 1127.27            | 3120.33            | 4.094                          | 1072.50            | 4390.86            |
| A_68_P28118794 | chr11:109334955-109334999                         | NM_001029842:-66        | Slc16a6       | PROMOTER               | 1.479                                                        | 1.583                          | 2491.68            | 3944.60            | 2.342                          | 1947.22            | 4560.78            |
| A_68_P20734232 | chr1:156646813-156646857                          | AK046991:-6961          |               | PROMOTER               | 1.479                                                        | 3.585                          | 816.76             | 2928.19            | 5.304                          | 648.34             | 3438.64            |
| A_68_P31292460 | chr17:64213972-64214016                           | ENSMUST00000112829:631  |               | INSIDE                 | 1.479                                                        | 1.881                          | 1392.48            | 2618.96            | 2.781                          | 1147.32            | 3191.23            |
| A_68_P31398060 | chr17:83675697-83675741                           | ENSMUST00000157785:6408 |               | DOWNSTREAM             | 1.479                                                        | 2.246                          | 610.82             | 1371.64            | 3.321                          | 602.51             | 2000.92            |
| A_68_P24115156 | chr5:135663662-135663706                          | NM_011714:492           | Baz1b         | INSIDE                 | 1.478                                                        | 1.392                          | 1457.67            | 2028.70            | 2.057                          | 1309.96            | 2694.99            |
| A_68_P32982437 | chr5:135114511-135114555                          | NM_033561:666           | Eif4h         | INSIDE                 | 1.478                                                        | 1.455                          | 1737.39            | 2528.45            | 2.151                          | 1363.07            | 2931.61            |
| A_68_P32092668 | chr19:36993413-36993457                           | NM_028263:655           | Fgf3          | INSIDE                 | 1.478                                                        | 3.750                          | 1172.92            | 4398.74            | 5.545                          | 945.62             | 5243.20            |
| A_68_P23201329 | chr4:109148711-109148755                          | NM_013876:378           | Rnf11         | INSIDE                 | 1.478                                                        | 2.590                          | 15012.97           | 38881.78           | 3.829                          | 12506.99           | 47883.74           |
| A_68_P29233990 | chr13:95055582-95055626                           | NM_029153:-368          | Scamp1        | PROMOTER               | 1.478                                                        | 2.340                          | 3444.93            | 8061.13            | 3.458                          | 2510.77            | 8681.86            |
| A_68_P24951790 | chr7:5004491-5004536                              | NM_026900:1380          | Zfp580        | INSIDE                 | 1.478                                                        | 1.663                          | 883.25             | 1468.74            | 2.457                          | 733.71             | 1802.93            |
| A_68_P29145780 | chr13:74487726-74487770                           | NM_001168659:-16        | Ccdc127       | DIVERGENT_PROMOTER     | 1.477                                                        | 1.989                          | 1765.25            | 3510.96            | 2.938                          | 1523.36            | 4475.30            |
| A_68_P29631499 | chr14:58694324-58694368                           | NM_013518:2824          | Fgf9          | INSIDE                 | 1.477                                                        | 2.331                          | 3091.01            | 7204.39            | 3.443                          | 2442.41            | 8408.05            |
| A_68_P28043342 | chr11:96133436-96133480                           | NM_008270:815           | Hoxb9         | INSIDE                 | 1.477                                                        | 3.738                          | 3533.47            | 13209.48           | 5.520                          | 2622.75            | 14478.89           |
| A_68_P25089581 | chr7:52094932-52094976                            | NM_010215:3297          | Il4i1         | INSIDE                 | 1.477                                                        | 3.776                          | 2505.62            | 9461.75            | 5.578                          | 1728.23            | 9639.62            |
| A_68_P30290903 | chr15:66118372-66118416                           | NM_152923:-608          | Kcnq3         | PROMOTER               | 1.477                                                        | 2.368                          | 814.02             | 1927.72            | 3.499                          | 706.35             | 2471.19            |
| A_68_P32299549 | chrX:22942071-22942115                            | NM_026167:87            | Klhl13        | INSIDE                 | 1.477                                                        | 1.778                          | 456.55             | 811.58             | 2.625                          | 245.96             | 645.62             |
| A_68_P23657073 | chr5:45911523-45911567                            | NM_025895:77            | Med28         | INSIDE                 | 1.477                                                        | 2.740                          | 677.29             | 1855.49            | 4.047                          | 663.80             | 2686.45            |

| ProbeName      | Target position of probe on CpG island microarray | TargetID                | GeneSymbol | CpG island Description | Ratio of relative methylation (TiO <sub>2</sub> -NP/Vehicle) | Sham group                     |                    |                    | TiO <sub>2</sub> -H group      |                    |                    |
|----------------|---------------------------------------------------|-------------------------|------------|------------------------|--------------------------------------------------------------|--------------------------------|--------------------|--------------------|--------------------------------|--------------------|--------------------|
|                |                                                   |                         |            |                        |                                                              | Relative methylation (Cy5/Cy3) | Cy3 signal (Input) | Cy5 signal (MeDIP) | Relative methylation (Cy5/Cy3) | Cy3 signal (Input) | Cy5 signal (MeDIP) |
| A_68_P28202815 | chr12:4881183-4881227                             | NM_001033488:-39        | Mfsd2b     | PROMOTER               | 1.477                                                        | 3.023                          | 1201.75            | 3632.72            | 4.464                          | 1000.10            | 4464.73            |
| A_68_P31621449 | chr18:36178281-36178325                           | NM_001167891:178512     | Nrg2       | INSIDE                 | 1.477                                                        | 1.702                          | 3373.35            | 5741.23            | 2.514                          | 2787.93            | 7007.95            |
| A_68_P31844540 | chr18:77098052-77098096                           | NM_001109743:2931       | Skor2      | INSIDE                 | 1.477                                                        | 3.276                          | 1955.84            | 6407.97            | 4.840                          | 1593.65            | 7712.69            |
| A_68_P21303493 | chr2:68309091-68309135                            | NM_016866:926           | Stk39      | INSIDE                 | 1.477                                                        | 1.631                          | 1186.56            | 1935.83            | 2.409                          | 904.06             | 2264.78            |
| A_68_P21763712 | chr2:154876566-154876610                          | NM_015770:37283         | a          | INSIDE                 | 1.476                                                        | 2.976                          | 2522.97            | 7508.93            | 4.393                          | 2039.92            | 8962.22            |
| A_68_P21068908 | chr2:24790503-24790547                            | NM_001162485:277        | Arrdc1     | INSIDE                 | 1.476                                                        | 2.759                          | 3219.05            | 8881.57            | 4.072                          | 2742.21            | 11166.22           |
| A_68_P28175493 | chr11:118908126-118908170                         | NM_013926:-5921         | Cbx8       | PROMOTER               | 1.476                                                        | 3.311                          | 1112.60            | 3683.47            | 4.887                          | 1022.16            | 4995.76            |
| A_68_P29961483 | chr14:122805935-122805979                         | NR_033326:44412         | Gm5089     | INSIDE                 | 1.476                                                        | 2.444                          | 1001.95            | 2448.52            | 3.607                          | 904.65             | 3263.19            |
| A_68_P24687704 | chr6:99643282-99643326                            | NM_008158:632           | Gpr27      | INSIDE                 | 1.476                                                        | 2.762                          | 1794.15            | 4955.86            | 4.077                          | 1534.99            | 6257.79            |
| A_68_P30490486 | chr15:101062223-101062267                         | NM_019518:7607          | Grasp      | INSIDE                 | 1.476                                                        | 3.723                          | 1411.87            | 5256.42            | 5.494                          | 1174.75            | 6454.27            |
| A_68_P28540459 | chr12:75009270-75009315                           | NM_010431:439           | Hif1a      | INSIDE                 | 1.476                                                        | 1.586                          | 647.19             | 1026.57            | 2.341                          | 554.41             | 1297.97            |
| A_68_P25842937 | chr8:48759109-48759153                            | NM_023503:1383          | Ing2       | INSIDE                 | 1.476                                                        | 4.309                          | 13402.38           | 57746.43           | 6.362                          | 10088.99           | 64183.56           |
| A_68_P25095113 | chr7:53050658-53050702                            | NM_001005511:11364      | Lmtk3      | INSIDE                 | 1.476                                                        | 3.613                          | 2223.54            | 8034.61            | 5.333                          | 1761.72            | 9394.45            |
| A_68_P31937501 | chr19:7131176-7131220                             | NM_134147:-59           | Macrodl    | PROMOTER               | 1.476                                                        | 1.539                          | 564.55             | 868.61             | 2.271                          | 522.48             | 1186.46            |
| A_68_P31108447 | chr17:26260564-26260608                           | NM_024227:139           | Mrp128     | INSIDE                 | 1.476                                                        | 2.097                          | 887.71             | 1861.50            | 3.096                          | 711.74             | 2203.30            |
| A_68_P27647504 | chr11:23671033-23671077                           | NM_009044:-84           | Rel        | PROMOTER               | 1.476                                                        | 3.631                          | 2050.13            | 7443.76            | 5.360                          | 1961.62            | 9067.89            |
| A_68_P30424512 | chr15:89145509-89145553                           | NM_001081030:212        | Sbf1       | INSIDE                 | 1.476                                                        | 2.299                          | 1415.78            | 3255.00            | 3.394                          | 1200.13            | 4072.88            |
| A_68_P31927885 | chr19:5295364-5295408                             | NM_030109:69            | Sf3b2      | INSIDE                 | 1.476                                                        | 1.915                          | 760.31             | 1456.16            | 2.828                          | 580.86             | 1642.40            |
| A_68_P25516577 | chr7:136735544-136735588                          | NM_172255:190           | Wdr11      | INSIDE                 | 1.476                                                        | 2.364                          | 1435.09            | 3393.22            | 3.491                          | 1131.32            | 3949.42            |
| A_68_P2872932  | chr12:110032712-110032756                         | NM_009537:1214          | Yy1        | INSIDE                 | 1.476                                                        | 2.304                          | 672.44             | 1549.27            | 3.400                          | 504.55             | 1715.50            |
| A_68_P24934667 | chr6:147424670-147424714                          | NM_025911:300           | Ccdc91     | INSIDE                 | 1.475                                                        | 1.446                          | 1335.79            | 1931.52            | 2.133                          | 1180.74            | 2518.27            |
| A_68_P31208746 | chr17:46889025-46889069                           | NM_028065:115           | Cnpy3      | INSIDE                 | 1.475                                                        | 2.679                          | 2370.77            | 6352.00            | 3.953                          | 2092.09            | 8270.42            |
| A_68_P22564417 | chr3:137286650-137286694                          | NM_030143:37            | Ddit4l     | INSIDE                 | 1.475                                                        | 1.539                          | 1359.15            | 2091.21            | 2.269                          | 1223.36            | 2775.50            |
| A_68_P25005644 | chr7:25370658-25370702                            | NM_023154:-1881         | Ethel1     | PROMOTER               | 1.475                                                        | 3.742                          | 7705.46            | 28832.32           | 5.518                          | 5065.39            | 27952.41           |
| A_68_P31213683 | chr17:47831917-47831961                           | NM_144939:-217          | Frs3       | DIVERGENT_PROMOTER     | 1.475                                                        | 3.687                          | 4050.49            | 14933.40           | 5.437                          | 3058.19            | 16628.36           |
| A_68_P28558333 | chr12:78339907-78339951                           | NM_016893:-79           | Fut8       | PROMOTER               | 1.475                                                        | 4.612                          | 1535.76            | 7083.22            | 6.801                          | 1349.59            | 9179.20            |
| A_68_P31256045 | chr17:56567492-56567536                           | NM_011218:48389         | Ptprs      | INSIDE                 | 1.475                                                        | 3.272                          | 739.29             | 2419.22            | 4.827                          | 634.65             | 3063.46            |
| A_68_P30980682 | chr16:94535261-94535305                           | ENSMUST00000163193:-112 |            | PROMOTER               | 1.475                                                        | 1.966                          | 1953.55            | 3840.35            | 2.899                          | 1530.36            | 4436.57            |
| A_68_P22410430 | chr3:107889618-107889662                          | NM_028779:-95           | Ampd2      | DIVERGENT_PROMOTER     | 1.474                                                        | 2.476                          | 2023.84            | 5010.93            | 3.650                          | 1662.24            | 6066.48            |
| A_68_P21105464 | chr2:30683897-30683941                            | NM_133346:-98           | Asb6       | PROMOTER               | 1.474                                                        | 2.095                          | 2429.69            | 5091.41            | 3.090                          | 1863.61            | 5758.05            |
| A_68_P28731499 | chr12:110271722-110271766                         | NM_001163175:34683      | Begain     | INSIDE                 | 1.474                                                        | 1.755                          | 1061.50            | 1862.57            | 2.587                          | 1268.33            | 3280.56            |
| A_68_P22342938 | chr3:95032702-95032746                            | NM_001038708:-149       | Cdc42sec1  | PROMOTER               | 1.474                                                        | 1.703                          | 954.06             | 1624.94            | 2.511                          | 824.34             | 2070.21            |
| A_68_P24290981 | chr6:22306235-22306279                            | NM_138587:-175          | Fam3c      | PROMOTER               | 1.474                                                        | 2.029                          | 914.58             | 1855.65            | 2.991                          | 785.68             | 2350.17            |
| A_68_P26676070 | chr9:81757205-81757249                            | NM_175213:-124          | Mei4       | PROMOTER               | 1.474                                                        | 5.220                          | 1402.00            | 7318.95            | 7.693                          | 1110.60            | 8544.04            |
| A_68_P25090468 | chr7:52241783-52241827                            | NM_019830:-102          | Prmt1      | PROMOTER               | 1.474                                                        | 1.607                          | 2363.69            | 3798.86            | 2.369                          | 1816.10            | 4303.19            |
| A_68_P24001336 | chr5:114443642-114443686                          | NM_198109:102           | Ssh1       | INSIDE                 | 1.474                                                        | 4.300                          | 884.83             | 3805.16            | 6.338                          | 760.01             | 4816.69            |
| A_68_P24425029 | chr6:47893194-47893238                            | NR_027963:43            | Zfp783     | INSIDE                 | 1.474                                                        | 2.346                          | 1905.66            | 4470.50            | 3.459                          | 1740.08            | 6018.63            |
| A_68_P32913428 | A_68_P32913428                                    |                         |            | Unknown                | 1.474                                                        | 2.135                          | 546.97             | 1168.06            | 3.147                          | 484.41             | 1524.41            |
| A_68_P31936888 | chr19:7026555-7026600                             | NM_007522:10233         | Bad        | DOWNSTREAM             | 1.473                                                        | 1.814                          | 420.70             | 763.12             | 2.671                          | 360.42             | 962.84             |
| A_68_P23327642 | chr4:134829090-134829134                          | NM_013885:-437          | Clic4      | PROMOTER               | 1.473                                                        | 2.877                          | 1202.13            | 3458.33            | 4.238                          | 1110.86            | 4707.56            |
| A_68_P25307422 | chr7:96553151-96553195                            | NM_008055:297           | Fzd4       | INSIDE                 | 1.473                                                        | 4.265                          | 1247.89            | 5321.97            | 6.281                          | 967.76             | 6078.42            |
| A_68_P24991771 | chr7:19742770-19742814                            | NM_001080815:8684       | Gipr       | INSIDE                 | 1.473                                                        | 1.415                          | 964.19             | 1364.02            | 2.084                          | 816.47             | 1701.45            |
| A_68_P27279734 | chr10:79383882-79383926                           | NM_053244:4189          | Kiss1r     | INSIDE                 | 1.473                                                        | 2.818                          | 2528.95            | 7125.36            | 4.150                          | 2110.00            | 8756.97            |
| A_68_P22882678 | chr4:45412906-45412950                            | NM_001009949:8710       | Mcart1     | INSIDE                 | 1.473                                                        | 3.680                          | 1682.66            | 6191.40            | 5.420                          | 1213.04            | 6574.76            |
| A_68_P31947893 | chr19:10092733-10092777                           | NM_144538:37            | Rab3il1    | INSIDE                 | 1.473                                                        | 2.026                          | 2171.86            | 4400.28            | 2.985                          | 1800.08            | 5373.28            |
| A_68_P25434388 | chr7:121260597-121260641                          | NM_025846:677           | Rras2      | INSIDE                 | 1.473                                                        | 2.462                          | 1960.46            | 4826.78            | 3.626                          | 1799.97            | 6525.85            |
| A_68_P27942519 | chr11:78115075-78115119                           | NM_017407:4             | Spag5      | INSIDE                 | 1.473                                                        | 1.878                          | 1066.65            | 2003.56            | 2.767                          | 949.08             | 2625.70            |
| A_68_P28940415 | chr13:34838970-34839014                           | NM_138746:7482          | Fam50b     | INSIDE                 | 1.472                                                        | 4.375                          | 983.48             | 4303.21            | 6.443                          | 877.56             | 5653.70            |
| A_68_P24658385 | chr6:94649976-94650020                            | NM_008377:141           | Lrig1      | INSIDE                 | 1.472                                                        | 2.625                          | 1485.04            | 3898.55            | 3.863                          | 1194.57            | 4614.70            |
| A_68_P25957682 | chr8:74116758-74116804                            | NM_025396:698           | Pgls       | INSIDE                 | 1.472                                                        | 3.782                          | 238.51             | 902.11             | 5.567                          | 196.15             | 1092.01            |
| A_68_P32144302 | chr19:46576160-46576204                           | NM_053100:45            | Trim8      | INSIDE                 | 1.472                                                        | 7.776                          | 169.31             | 1316.65            | 11.445                         | 147.21             | 1684.80            |



| ProbeName      | Target position of probe on CpG island microarray | TargetID                 | GeneSymbol | CpG island Description | Ratio of relative methylation (TiO <sub>2</sub> -NP/Vehicle) | Sham group                     |                    |                    | TiO <sub>2</sub> -H group      |                    |                    |
|----------------|---------------------------------------------------|--------------------------|------------|------------------------|--------------------------------------------------------------|--------------------------------|--------------------|--------------------|--------------------------------|--------------------|--------------------|
|                |                                                   |                          |            |                        |                                                              | Relative methylation (Cy5/Cy3) | Cy3 signal (Input) | Cy5 signal (MeDIP) | Relative methylation (Cy5/Cy3) | Cy3 signal (Input) | Cy5 signal (MeDIP) |
| A_68_P28606269 | chr12:87165967-87166011                           | NM_001081423:89          | Tu15       | INSIDE                 | 1.472                                                        | 2.014                          | 2091.25            | 4211.80            | 2.964                          | 1633.16            | 4840.56            |
| A_68_P27179603 | chr10:60736419-60736463                           | NM_001081127:-254        | Adams14    | PROMOTER               | 1.471                                                        | 2.066                          | 1282.18            | 2648.46            | 3.039                          | 949.89             | 2886.88            |
| A_68_P30221123 | chr15:53177744-53177788                           | NM_010162:-28            | Ext1       | PROMOTER               | 1.471                                                        | 2.194                          | 858.05             | 1882.41            | 3.228                          | 768.85             | 2481.85            |
| A_68_P30278744 | chr15:63829220-63829264                           | NM_144846:62768          | Fam49b     | INSIDE                 | 1.471                                                        | 2.677                          | 3820.71            | 10227.82           | 3.938                          | 3260.43            | 12839.04           |
| A_68_P28470857 | chr12:60320041-60320085                           | NM_001033156:408         | Fbxo33     | INSIDE                 | 1.471                                                        | 2.157                          | 1060.35            | 2287.30            | 3.173                          | 764.70             | 2426.15            |
| A_68_P29631503 | chr14:58694761-58694806                           | NM_013518:3261           | Fgf9       | INSIDE                 | 1.471                                                        | 2.692                          | 4216.43            | 11351.25           | 3.960                          | 2938.61            | 11637.08           |
| A_68_P27946741 | chr11:78858490-78858534                           | NM_013571:101344         | Ksr1       | INSIDE                 | 1.471                                                        | 5.982                          | 3427.78            | 20503.67           | 8.798                          | 2564.13            | 22559.04           |
| A_68_P27284853 | chr10:80153805-80153849                           | NM_172457:10739          | Mobk12a    | INSIDE                 | 1.471                                                        | 1.689                          | 400.71             | 676.92             | 2.485                          | 310.65             | 771.97             |
| A_68_P23364089 | chr4:141001208-141001252                          | NM_009541:643            | Zbtb17     | INSIDE                 | 1.471                                                        | 1.663                          | 1350.23            | 2246.10            | 2.446                          | 1220.67            | 2986.11            |
| A_68_P20148961 | chr1:36604157-36604208                            | NM_026241:-136           | Ankrd39    | PROMOTER               | 1.470                                                        | 2.684                          | 1725.21            | 4631.27            | 3.947                          | 1246.17            | 4918.90            |
| A_68_P31458869 | chr18:3507247-3507294                             | NM_026505:-684           | Bambi      | PROMOTER               | 1.470                                                        | 5.395                          | 495.23             | 2671.77            | 7.929                          | 382.40             | 3032.14            |
| A_68_P20561486 | chr1:122238913-122238957                          | NM_207233:1776           | C1ql2      | INSIDE                 | 1.470                                                        | 1.678                          | 855.66             | 1436.04            | 2.466                          | 656.37             | 1618.88            |
| A_68_P25610236 | chr7:152129258-152129302                          | NM_007631:-3450          | Cend1      | PROMOTER               | 1.470                                                        | 1.564                          | 751.82             | 1175.58            | 2.299                          | 574.03             | 1319.74            |
| A_68_P31864637 | chr18:80666392-80666436                           | NM_026295:-8             | Ctdp1      | PROMOTER               | 1.470                                                        | 3.845                          | 1779.09            | 6839.92            | 5.651                          | 1596.78            | 9024.09            |
| A_68_P31933635 | chr19:6276972-6277016                             | NM_010119:99             | Ehd1       | INSIDE                 | 1.470                                                        | 1.513                          | 1146.59            | 1734.21            | 2.224                          | 911.20             | 2026.38            |
| A_68_P26220864 | chr8:123062616-123062660                          | NM_001145896:1330        | Gse1       | INSIDE                 | 1.470                                                        | 2.649                          | 773.57             | 2049.13            | 3.893                          | 694.67             | 2704.14            |
| A_68_P24619086 | chr6:87931330-87931374                            | NM_198622:124            | H1fx       | INSIDE                 | 1.470                                                        | 4.319                          | 530.03             | 2289.23            | 6.347                          | 452.06             | 2869.37            |
| A_68_P30823193 | chr16:65105676-65105720                           | NM_008310:-88            | Htr1f      | PROMOTER               | 1.470                                                        | 3.713                          | 536.70             | 1992.53            | 5.458                          | 444.92             | 2428.27            |
| A_68_P24759667 | chr6:113419865-113419909                          | NM_001034029:10998       | Il17re     | INSIDE                 | 1.470                                                        | 4.822                          | 1404.21            | 6771.30            | 7.088                          | 1016.82            | 7207.65            |
| A_68_P31029172 | chr17:8994701-8994745                             | NM_011866:113            | Pde10a     | INSIDE                 | 1.470                                                        | 2.005                          | 3853.22            | 7725.23            | 2.948                          | 310.87             | 9228.68            |
| A_68_P32183825 | chr19:53751761-53751805                           | NM_001170847:-13         | Rbm20      | PROMOTER               | 1.470                                                        | 2.473                          | 1485.31            | 3673.77            | 3.636                          | 1185.94            | 4311.76            |
| A_68_P23466247 | chr5:8056554-8056598                              | NM_001080974:35          | Sri        | INSIDE                 | 1.470                                                        | 4.638                          | 4087.16            | 18956.12           | 6.819                          | 3246.30            | 22137.09           |
| A_68_P25614882 | chr8:3631030-3631074                              | NM_011503:-107           | Stxbp2     | DIVERGENT_PROMOTER     | 1.470                                                        | 2.653                          | 1940.51            | 5147.96            | 3.901                          | 1699.86            | 6630.50            |
| A_68_P31922247 | chr19:4283414-4283458                             | NM_026720:-299           | Ankrd13d   | PROMOTER               | 1.469                                                        | 3.237                          | 851.81             | 2757.27            | 4.755                          | 713.16             | 3391.01            |
| A_68_P20347398 | chr1:74283332-74283376                            | NM_029711:231            | Arpc2      | INSIDE                 | 1.469                                                        | 2.067                          | 4621.98            | 9555.06            | 3.037                          | 3605.94            | 10952.21           |
| A_68_P26624019 | chr9:71619304-71619348                            | NM_026599:83             | Cgln1      | INSIDE                 | 1.469                                                        | 2.364                          | 1632.58            | 3859.07            | 3.474                          | 1414.90            | 4914.66            |
| A_68_P24613526 | chr6:86992962-86993006                            | NM_013528:145            | Gfpt1      | INSIDE                 | 1.469                                                        | 1.416                          | 2116.35            | 2995.80            | 2.079                          | 1656.41            | 3444.36            |
| A_68_P27127237 | chr10:49508470-49508514                           | NM_00111268:68           | Grik2      | INSIDE                 | 1.469                                                        | 2.389                          | 940.44             | 2246.97            | 3.510                          | 827.91             | 2906.39            |
| A_68_P26954164 | chr10:13687012-13687056                           | NM_010437:850            | Hivep2     | INSIDE                 | 1.469                                                        | 4.341                          | 882.92             | 3832.82            | 6.377                          | 692.35             | 4415.08            |
| A_68_P29130726 | chr13:72101391-72101435                           | NM_010573:-241           | Irx1       | PROMOTER               | 1.469                                                        | 2.409                          | 1015.37            | 2445.87            | 3.539                          | 1123.70            | 3976.49            |
| A_68_P27989203 | chr1:186298068-86298112                           | NM_029788:-68            | Rnft1      | PROMOTER               | 1.469                                                        | 3.318                          | 3448.05            | 11440.91           | 4.873                          | 2688.37            | 13099.53           |
| A_68_P24590571 | chr6:82889627-82889671                            | NM_011350:96             | Sema4f     | INSIDE                 | 1.469                                                        | 4.504                          | 1390.53            | 6262.53            | 6.617                          | 1245.93            | 8244.76            |
| A_68_P21440134 | chr2:94113837-94113881                            | ENSMUST00000167726:-8943 |            | PROMOTER               | 1.469                                                        | 2.315                          | 5022.32            | 11624.23           | 3.399                          | 4033.70            | 13711.46           |
| A_68_P32704868 | chrX:138159961-138160005                          | NM_010572:-222           | Irs4       | PROMOTER               | 1.468                                                        | 1.836                          | 1144.09            | 2100.11            | 2.695                          | 660.25             | 1779.33            |
| A_68_P25098813 | chr7:53652081-53652125                            | NM_001112739:236         | Kenc1      | INSIDE                 | 1.468                                                        | 4.084                          | 1056.70            | 4316.07            | 5.996                          | 1000.33            | 5997.67            |
| A_68_P23331510 | chr4:13528254-13528298                            | NM_011942:233            | Lyp1a2     | INSIDE                 | 1.468                                                        | 1.701                          | 1471.16            | 2502.09            | 2.496                          | 1180.83            | 2947.92            |
| A_68_P28154417 | chr11:115474024-115474068                         | NM_027162:-229           | Mif4gd     | PROMOTER               | 1.468                                                        | 1.814                          | 4942.93            | 8967.52            | 2.663                          | 3768.32            | 10035.51           |
| A_68_P31095629 | chr17:24278798-24278842                           | NM_011062:-259           | Pdpk1      | PROMOTER               | 1.468                                                        | 2.422                          | 1361.05            | 3296.96            | 3.557                          | 993.71             | 3534.40            |
| A_68_P30348897 | chr15:76353005-76353049                           | NM_130893:-467           | Sert1      | PROMOTER               | 1.468                                                        | 1.878                          | 942.14             | 1769.61            | 2.757                          | 740.71             | 2042.07            |
| A_68_P22873079 | chr4:43682099-43682143                            | NM_001085508:278         | Tmem8b     | INSIDE                 | 1.468                                                        | 3.001                          | 2359.24            | 7081.21            | 4.405                          | 1952.29            | 8600.32            |
| A_68_P28166391 | chr11:117517129-117517173                         | NM_198022:1548           | Tnrc6c     | INSIDE                 | 1.468                                                        | 2.606                          | 2960.80            | 7715.59            | 3.825                          | 2299.18            | 8794.43            |
| A_68_P23576671 | chr5:31441022-31441066                            | NM_021290:224            | Ucn        | INSIDE                 | 1.468                                                        | 3.501                          | 2317.10            | 8112.83            | 5.142                          | 1802.53            | 9267.79            |
| A_68_P23272342 | chr4:124805193-124805237                          | NM_153159:-89            | Zc3h12a    | PROMOTER               | 1.468                                                        | 3.508                          | 1523.15            | 5342.63            | 5.148                          | 1237.05            | 6368.43            |
| A_68_P23441289 | chr4:155266283-155266327                          | NM_207223:321            | Acap3      | INSIDE                 | 1.467                                                        | 3.063                          | 1838.00            | 5630.53            | 4.495                          | 1604.68            | 7213.71            |
| A_68_P32769554 | chrX:154481205-154481249                          | NM_177751:-184           | Cnksr2     | PROMOTER               | 1.467                                                        | 1.785                          | 1035.89            | 1848.56            | 2.618                          | 662.20             | 1733.68            |
| A_68_P24009176 | chr5:115798923-115798967                          | NM_007748:20             | Cox6a1     | INSIDE                 | 1.467                                                        | 3.389                          | 3166.66            | 10730.30           | 4.969                          | 2503.40            | 12440.52           |
| A_68_P31347827 | chr17:74059382-74059426                           | NM_027864:387            | Galnt14    | INSIDE                 | 1.467                                                        | 3.466                          | 987.63             | 3423.01            | 5.085                          | 958.75             | 4875.38            |
| A_68_P31493066 | chr18:11054906-11054950                           | NM_010258:2421           | Gata6      | INSIDE                 | 1.467                                                        | 4.748                          | 2399.43            | 11393.63           | 6.966                          | 2124.96            | 14802.92           |
| A_68_P29581905 | chr14:47993552-47993596                           | NM_001145953:40          | Lgals3     | INSIDE                 | 1.467                                                        | 2.547                          | 2541.06            | 6470.88            | 3.736                          | 2078.11            | 7763.12            |
| A_68_P20806523 | chr1:169619018-169619062                          | NM_033652:-648           | Lmx1a      | PROMOTER               | 1.467                                                        | 3.092                          | 1588.97            | 4913.37            | 4.536                          | 1242.36            | 5635.68            |
| A_68_P25934950 | chr8:69384793-69384837                            | NM_001163564:699         | Naf1       | INSIDE                 | 1.467                                                        | 1.903                          | 1890.51            | 3598.40            | 2.793                          | 1778.06            | 4966.22            |

| ProbeName      | Target position of probe on CpG island microarray | TargetID                 | GeneSymbol    | CpG island Description | Ratio of relative methylation (TiO <sub>2</sub> -NP/Vehicle) | Sham group                     |                    |                    | TiO <sub>2</sub> -H group      |                    |                    |
|----------------|---------------------------------------------------|--------------------------|---------------|------------------------|--------------------------------------------------------------|--------------------------------|--------------------|--------------------|--------------------------------|--------------------|--------------------|
|                |                                                   |                          |               |                        |                                                              | Relative methylation (Cy5/Cy3) | Cy3 signal (Input) | Cy5 signal (MeDIP) | Relative methylation (Cy5/Cy3) | Cy3 signal (Input) | Cy5 signal (MeDIP) |
| A_68_P31093355 | chr17:23876913-23876957                           | NM_023824:363            | Paqr4         | INSIDE                 | 1.467                                                        | 1.879                          | 1257.55            | 2362.82            | 2.756                          | 997.12             | 2748.02            |
| A_68_P31940079 | chr19:7557572-7557616                             | NM_053076:177            | Rtn3          | INSIDE                 | 1.467                                                        | 1.906                          | 2243.05            | 4274.38            | 2.795                          | 1833.22            | 5124.16            |
| A_68_P26892104 | chr9:122832365-122832409                          | NM_009544:191            | Zfp105        | INSIDE                 | 1.467                                                        | 3.399                          | 1751.18            | 5952.06            | 4.986                          | 1650.02            | 8227.28            |
| A_68_P25600927 | chr7:150623918-150623962                          |                          |               | Unknown                | 1.467                                                        | 2.640                          | 1461.25            | 3857.25            | 3.872                          | 1226.22            | 4748.16            |
| A_68_P32565204 | chrX:98893057-98893101                            | ENSMUST00000073812:-5889 |               | PROMOTER               | 1.467                                                        | 6.825                          | 7499.20            | 51181.65           | 10.011                         | 3237.87            | 32412.92           |
| A_68_P21105459 | chr2:30683485-30683529                            | NM_133346:314            | Asb6          | INSIDE                 | 1.466                                                        | 1.854                          | 831.64             | 1541.56            | 2.718                          | 687.12             | 1867.83            |
| A_68_P26235085 | chr8:125202360-125202404                          | NM_001109873:-307        | Cbfa2t3       | PROMOTER               | 1.466                                                        | 5.797                          | 1592.00            | 9228.23            | 8.499                          | 1563.32            | 13286.47           |
| A_68_P25082512 | chr7:50721931-50721975                            | NM_001164518:23441       | Igln5         | DOWNSTREAM             | 1.466                                                        | 6.673                          | 1298.78            | 8666.90            | 9.782                          | 1293.35            | 12651.86           |
| A_68_P23560503 | chr5:28397698-28397742                            | NM_153526:-231           | Insig1        | PROMOTER               | 1.466                                                        | 2.699                          | 830.23             | 2240.95            | 3.956                          | 742.87             | 2938.95            |
| A_68_P24838924 | chr6:128374739-128374783                          | NM_133927:168            | Irfg2         | INSIDE                 | 1.466                                                        | 2.138                          | 879.52             | 1880.20            | 3.135                          | 701.85             | 2200.15            |
| A_68_P21305453 | chr2:68700233-68700278                            | NM_172856:642            | Lass6         | INSIDE                 | 1.466                                                        | 3.774                          | 2495.47            | 9417.92            | 5.533                          | 2252.29            | 12461.69           |
| A_68_P32137226 | chr19:45309781-45309825                           | NM_010691:-76            | Lbx1          | PROMOTER               | 1.466                                                        | 11.283                         | 1551.16            | 17502.06           | 16.539                         | 1307.13            | 21618.77           |
| A_68_P23260196 | chr4:122673426-122673470                          | NM_008506:107            | Myel1         | INSIDE                 | 1.466                                                        | 3.773                          | 3472.25            | 13102.03           | 5.531                          | 2920.99            | 16155.65           |
| A_68_P23298638 | chr4:129497304-129497348                          | NM_008974:-396           | Ptp4a2        | PROMOTER               | 1.466                                                        | 2.069                          | 1542.71            | 3191.27            | 3.033                          | 1412.18            | 4283.62            |
| A_68_P27949795 | chr11:79404844-79404888                           | NM_175543:153            | Rab11fip4     | INSIDE                 | 1.466                                                        | 1.779                          | 517.95             | 921.50             | 2.609                          | 505.92             | 1319.93            |
| A_68_P26569961 | chr9:62190386-62190430                            | NM_009672:1259           | Anp32a        | INSIDE                 | 1.465                                                        | 2.912                          | 3661.25            | 10661.31           | 4.265                          | 2424.99            | 10342.80           |
| A_68_P26135515 | chr8:108231965-108232009                          | NM_198299:82             | E130303B06Rik | INSIDE                 | 1.465                                                        | 2.072                          | 5535.37            | 11468.49           | 3.036                          | 4238.37            | 12868.85           |
| A_68_P21940379 | chr3:10012439-10012483                            | NM_010634:-145           | Fabp5         | PROMOTER               | 1.465                                                        | 3.164                          | 4173.05            | 13202.55           | 4.634                          | 3534.74            | 16381.28           |
| A_68_P21338643 | chr2:74506367-74506411                            | NM_008275:22             | Hoxd13        | INSIDE                 | 1.465                                                        | 1.856                          | 2823.18            | 5239.55            | 2.719                          | 2470.82            | 6719.12            |
| A_68_P25016216 | chr7:28013358-28013402                            | NM_181593:236            | Itpkc         | INSIDE                 | 1.465                                                        | 1.916                          | 810.49             | 1553.14            | 2.808                          | 728.28             | 2045.11            |
| A_68_P28290827 | chr12:25336485-25336529                           | NM_178357:271            | Klfl1         | INSIDE                 | 1.465                                                        | 1.528                          | 4868.62            | 7437.65            | 2.239                          | 3523.30            | 7887.89            |
| A_68_P25617732 | chr8:4493215-4493259                              | NM_026058:-168           | Lass4         | PROMOTER               | 1.465                                                        | 2.568                          | 11509.06           | 29554.92           | 3.763                          | 7642.87            | 28758.22           |
| A_68_P24159372 | chr5:144861058-144861106                          | NM_001081109:-222        | Lmtk2         | PROMOTER               | 1.465                                                        | 2.419                          | 1587.58            | 3840.24            | 3.544                          | 1278.35            | 4530.73            |
| A_68_P31296466 | chr17:64951197-64951241                           | NM_008549:230            | Man2a1        | INSIDE                 | 1.465                                                        | 1.975                          | 798.17             | 1576.45            | 2.894                          | 699.34             | 2024.02            |
| A_68_P32384750 | chrX:50265645-50265689                            | NM_027642:224            | Phf6          | INSIDE                 | 1.465                                                        | 2.584                          | 518.16             | 1338.87            | 3.786                          | 317.74             | 1202.89            |
| A_68_P28103448 | chr11:106640841-106640885                         | NM_015810:-11            | Polg2         | PROMOTER               | 1.465                                                        | 2.977                          | 1175.26            | 3498.35            | 4.361                          | 987.01             | 4303.98            |
| A_68_P31303252 | chr17:66234323-66234367                           | NM_001198949:-81         | Ralbp1        | PROMOTER               | 1.465                                                        | 2.500                          | 1059.86            | 2650.05            | 3.662                          | 858.46             | 3143.61            |
| A_68_P25050063 | chr7:36370599-36370643                            | NM_145840:-19            | Rgs9bp        | DIVERGENT_PROMOTER     | 1.465                                                        | 2.928                          | 2932.41            | 8585.37            | 4.289                          | 2328.77            | 9987.40            |
| A_68_P22049391 | chr3:34549338-34549382                            | NM_011443:434            | Sox2          | INSIDE                 | 1.465                                                        | 2.631                          | 565.14             | 1486.72            | 3.854                          | 461.29             | 1777.59            |
| A_68_P31210123 | chr17:47147224-47147268                           | NM_001177374:235         | Ubr2          | INSIDE                 | 1.465                                                        | 2.951                          | 1438.47            | 4244.75            | 4.324                          | 1223.15            | 5288.34            |
| A_68_P20737709 | chr1:157263929-157263973                          | NM_011273:624            | Xpr1          | INSIDE                 | 1.465                                                        | 1.630                          | 3904.60            | 6363.37            | 2.387                          | 3173.16            | 7575.19            |
| A_68_P29478601 | chr14:26427680-26427724                           | NM_183208:149032         | Zmiz1         | INSIDE                 | 1.465                                                        | 3.821                          | 2002.18            | 7651.11            | 5.600                          | 1832.49            | 10261.89           |
| A_68_P24044663 | chr5:121902036-121902080                          | NM_026129:425            | Erp29         | INSIDE                 | 1.464                                                        | 2.054                          | 1586.70            | 3258.30            | 3.006                          | 1213.06            | 3646.79            |
| A_68_P24397652 | chr6:42273788-42273832                            | NM_001113327:829         | Fam131b       | INSIDE                 | 1.464                                                        | 1.928                          | 4011.99            | 7734.52            | 2.823                          | 2915.36            | 8228.84            |
| A_68_P27087305 | chr10:40792189-40792233                           | NM_199058:-820           | Gpr6          | PROMOTER               | 1.464                                                        | 2.788                          | 1679.17            | 4680.85            | 4.082                          | 1357.03            | 5538.88            |
| A_68_P24249109 | chr6:13788674-13788718                            | NM_145066:1152           | Gpr85         | INSIDE                 | 1.464                                                        | 2.339                          | 811.08             | 1896.88            | 3.423                          | 698.33             | 2390.38            |
| A_68_P29186150 | chr13:83662891-83662935                           | NM_001170537:19880       | MeI2c         | INSIDE                 | 1.464                                                        | 2.933                          | 282.49             | 828.67             | 4.294                          | 332.88             | 1429.43            |
| A_68_P26977748 | chr10:18564800-18564844                           | NM_022032:-54            | Perp          | PROMOTER               | 1.464                                                        | 4.788                          | 899.74             | 4307.54            | 7.009                          | 868.93             | 6090.44            |
| A_68_P25262772 | chr7:86866415-86866459                            | NM_001113471:11226       | Plin1         | INSIDE                 | 1.464                                                        | 1.697                          | 461.93             | 784.11             | 2.484                          | 394.86             | 981.02             |
| A_68_P29033142 | chr13:51662332-51662377                           | NM_009167:99             | Shc3          | INSIDE                 | 1.464                                                        | 2.474                          | 2443.96            | 6045.47            | 3.622                          | 2096.84            | 7594.48            |
| A_68_P27915805 | chr11:73013090-73013134                           | NM_029031:129            | Shpk          | INSIDE                 | 1.464                                                        | 4.681                          | 893.22             | 4181.24            | 6.852                          | 813.06             | 5571.09            |
| A_68_P32341125 | chrX:39502207-39502251                            | NM_001077712:-360        | Stag2         | PROMOTER               | 1.464                                                        | 3.496                          | 726.62             | 2540.10            | 5.118                          | 473.46             | 2423.23            |
| A_68_P20186939 | chr1:43149198-43149242                            | NM_001013025:6247        | Tgfbra1       | INSIDE                 | 1.464                                                        | 1.582                          | 1869.01            | 2956.34            | 2.316                          | 1806.50            | 4183.12            |
| A_68_P26349635 | chr9:21741759-21741803                            | NM_144935:-937           | BC018242      | PROMOTER               | 1.463                                                        | 2.870                          | 814.01             | 2336.54            | 4.200                          | 613.10             | 2574.99            |
| A_68_P23895412 | chr5:93104159-93104203                            | NM_177230:-27            | Ccdc158       | DIVERGENT_PROMOTER     | 1.463                                                        | 2.184                          | 2971.54            | 6488.40            | 3.195                          | 2388.53            | 7632.27            |
| A_68_P28727032 | chr12:109512870-109512914                         | NM_001159910:735         | Ccdc85c       | INSIDE                 | 1.463                                                        | 3.637                          | 1292.84            | 4702.43            | 5.322                          | 989.31             | 5264.62            |
| A_68_P27495835 | chr10:119638550-119638594                         | NM_028679:21             | Irak3         | INSIDE                 | 1.463                                                        | 1.455                          | 1018.19            | 1481.09            | 2.128                          | 954.18             | 2030.95            |
| A_68_P24623141 | chr6:88577383-88577427                            | NM_001142724:35          | Kbtbd12       | INSIDE                 | 1.463                                                        | 1.486                          | 1134.15            | 1685.45            | 2.174                          | 954.46             | 2075.22            |
| A_68_P30363285 | chr15:78765693-78765737                           | NM_133800:352            | Nol12         | INSIDE                 | 1.463                                                        | 2.228                          | 927.44             | 2066.66            | 3.260                          | 731.54             | 2384.58            |
| A_68_P30167378 | chr15:41620567-41620611                           | NM_001130163:-472        | Oxr1          | PROMOTER               | 1.463                                                        | 5.835                          | 1351.56            | 7886.92            | 8.537                          | 1228.20            | 10485.06           |
| A_68_P20015305 | chr1:7078905-7078949                              | NM_183028:-74            | Pcmtd1        | PROMOTER               | 1.463                                                        | 1.868                          | 1307.36            | 2442.13            | 2.733                          | 1061.13            | 2900.19            |

| ProbeName      | Target position of probe on CpG island microarray | TargetID           | GeneSymbol    | CpG island Description | Ratio of relative methylation (TiO <sub>2</sub> -NP/Vehicle) | Sham group                     |                    |                    | TiO <sub>2</sub> -H group      |                    |                    |
|----------------|---------------------------------------------------|--------------------|---------------|------------------------|--------------------------------------------------------------|--------------------------------|--------------------|--------------------|--------------------------------|--------------------|--------------------|
|                |                                                   |                    |               |                        |                                                              | Relative methylation (Cy5/Cy3) | Cy3 signal (Input) | Cy5 signal (MeDIP) | Relative methylation (Cy5/Cy3) | Cy3 signal (Input) | Cy5 signal (MeDIP) |
| A_68_P25435751 | chr7:121559514-121559558                          | NM_011055:769      | Pdc3b         | INSIDE                 | 1.463                                                        | 5.170                          | 900.72             | 4656.88            | 7.565                          | 729.69             | 5520.09            |
| A_68_P25504895 | chr7:134417127-134417171                          | NM_009266:425      | Seps2         | INSIDE                 | 1.463                                                        | 2.790                          | 990.62             | 2763.79            | 4.081                          | 1003.94            | 4097.31            |
| A_68_P25482572 | chr7:130267793-130267837                          | NM_144925:416      | Tnrc6a        | INSIDE                 | 1.463                                                        | 2.144                          | 694.03             | 1488.05            | 3.136                          | 563.02             | 1765.67            |
| A_68_P33008823 | chr4_random:109636-109680                         | NM_001033326:-143  | Dhrsx         | PROMOTER               | 1.462                                                        | 5.931                          | 7787.85            | 46191.47           | 8.670                          | 5024.52            | 43561.95           |
| A_68_P24218878 | chr6:6831381-6831425                              | NM_010056:666      | Dlx5          | INSIDE                 | 1.462                                                        | 1.541                          | 1552.47            | 2392.93            | 2.253                          | 1183.51            | 2666.48            |
| A_68_P32263511 | chrX:12338951-12338995                            | NM_001048208:127   | Med14         | INSIDE                 | 1.462                                                        | 2.879                          | 1207.83            | 3477.80            | 4.208                          | 984.15             | 4141.68            |
| A_68_P23618575 | chr5:38668403-38668447                            | NM_172709:-218     | Otop1         | PROMOTER               | 1.462                                                        | 1.997                          | 3392.73            | 6775.24            | 2.920                          | 2565.88            | 7491.60            |
| A_68_P21417957 | chr2:90420274-90420318                            | NM_008982:508      | Ptpnj         | PROMOTER               | 1.462                                                        | 3.067                          | 1620.25            | 4968.54            | 4.483                          | 1335.27            | 5985.98            |
| A_68_P29605618 | chr14:52877257-52877301                           | NM_172601:21792    | Rab2b         | DOWNSTREAM             | 1.462                                                        | 2.734                          | 2916.60            | 7973.69            | 3.998                          | 2339.42            | 9352.89            |
| A_68_P31302582 | chr17:66121758-66121802                           | NM_133685:312      | Rab31         | INSIDE                 | 1.462                                                        | 2.303                          | 5249.27            | 12088.18           | 3.368                          | 4134.74            | 13924.93           |
| A_68_P31924143 | chr19:4625643-4625687                             | NM_023131:-47      | Rce1          | PROMOTER               | 1.462                                                        | 1.354                          | 1807.90            | 2447.64            | 1.980                          | 1502.27            | 2973.96            |
| A_68_P21568741 | chr2:119096977-119097021                          | NM_145530:-36      | Rhov          | PROMOTER               | 1.462                                                        | 2.931                          | 2635.94            | 7726.37            | 4.286                          | 2156.95            | 9244.83            |
| A_68_P21911578 | chr2:181333602-181333646                          | NM_172676:228      | Samd10        | INSIDE                 | 1.462                                                        | 1.779                          | 1637.73            | 2913.00            | 2.601                          | 1257.33            | 3269.68            |
| A_68_P31929910 | chr19:5654473-5654517                             | NM_001164480:9213  | Sipa1         | INSIDE                 | 1.462                                                        | 1.743                          | 4619.05            | 8051.53            | 2.549                          | 3528.01            | 8992.71            |
| A_68_P22611968 | chr3:145651227-145651271                          | NM_001166064:415   | Syde2         | INSIDE                 | 1.462                                                        | 2.559                          | 707.01             | 1809.58            | 3.743                          | 622.20             | 2329.01            |
| A_68_P25581340 | chr7:147130450-147130494                          | NM_009482:718      | Utf1          | INSIDE                 | 1.462                                                        | 1.579                          | 3203.71            | 5057.77            | 2.308                          | 2204.81            | 5089.26            |
| A_68_P29455108 | chr14:22650786-22650830                           | NM_011695:26       | Vdac2         | INSIDE                 | 1.462                                                        | 8.363                          | 669.25             | 5597.08            | 12.226                         | 576.83             | 7052.33            |
| A_68_P21775097 | chr2:156904527-156904571                          | NM_001164663:453   | 9830001H06Rik | INSIDE                 | 1.461                                                        | 6.751                          | 1401.95            | 9464.94            | 9.864                          | 1289.26            | 12716.90           |
| A_68_P27339932 | chr10:90545143-90545187                           | NM_001042558:324   | Apa1f1        | INSIDE                 | 1.461                                                        | 1.626                          | 581.25             | 944.94             | 2.375                          | 514.37             | 1221.49            |
| A_68_P28525541 | chr12:72419505-72419549                           | NM_001190466:8656  | Dact1         | INSIDE                 | 1.461                                                        | 3.271                          | 948.47             | 3102.20            | 4.779                          | 740.23             | 3537.29            |
| A_68_P27540020 | chr10:127631671-127631715                         | NM_001033264:2     | Gis2          | INSIDE                 | 1.461                                                        | 2.403                          | 1119.85            | 2691.21            | 3.510                          | 1006.38            | 3532.25            |
| A_68_P22028772 | chr3:30407701-30407745                            | NM_021442:687      | Mecom         | INSIDE                 | 1.461                                                        | 2.306                          | 973.83             | 2245.24            | 3.368                          | 814.47             | 2742.77            |
| A_68_P32148151 | chr19:47253878-47253922                           | NM_021360:591      | Neur1a        | INSIDE                 | 1.461                                                        | 3.015                          | 2347.76            | 7079.64            | 4.406                          | 2046.66            | 9017.99            |
| A_68_P20641449 | chr1:137662705-137662749                          | NM_013750:65       | Phlda3        | INSIDE                 | 1.461                                                        | 3.491                          | 4817.35            | 16815.45           | 5.101                          | 4035.59            | 20586.57           |
| A_68_P27163773 | chr10:57909758-57909803                           | NM_011240:181      | Ranbp2        | INSIDE                 | 1.461                                                        | 2.070                          | 1044.40            | 2161.81            | 3.024                          | 955.85             | 2890.17            |
| A_68_P21494381 | chr2:105239586-105239630                          | NM_009037:-132     | Rcn1          | PROMOTER               | 1.461                                                        | 2.834                          | 960.25             | 2720.91            | 4.141                          | 859.45             | 3559.00            |
| A_68_P28031422 | chr11:94072689-94072733                           | NM_009427:-57      | Tob1          | PROMOTER               | 1.461                                                        | 2.069                          | 3383.56            | 6999.79            | 3.022                          | 2629.56            | 7945.46            |
| A_68_P20451933 | chr1:94803719-94803763                            | NM_175118:175      | Dusp28        | INSIDE                 | 1.460                                                        | 1.836                          | 1000.17            | 1836.32            | 2.680                          | 851.65             | 2282.69            |
| A_68_P31424359 | chr17:88039798-88039842                           | NM_008532:4502     | Epcam         | INSIDE                 | 1.460                                                        | 2.523                          | 659.90             | 1665.23            | 3.684                          | 541.12             | 1993.23            |
| A_68_P25018411 | chr7:28443445-28443489                            | NM_001081292:16151 | Map3k10       | INSIDE                 | 1.460                                                        | 2.763                          | 3810.58            | 10527.58           | 4.033                          | 2767.38            | 11161.07           |
| A_68_P26539664 | chr9:56843551-56843595                            | NM_019651:798      | Ptpn9         | INSIDE                 | 1.460                                                        | 2.050                          | 548.75             | 1125.07            | 2.993                          | 444.66             | 1330.79            |
| A_68_P32099689 | chr19:38199320-38199364                           | NM_011255:-41      | Rbp4          | PROMOTER               | 1.460                                                        | 2.293                          | 652.67             | 1496.39            | 3.348                          | 581.81             | 1947.91            |
| A_68_P20833904 | chr1:174493216-174493260                          | NR_027644:3202     | Vsig8         | INSIDE                 | 1.460                                                        | 1.492                          | 1794.63            | 2677.71            | 2.178                          | 1418.87            | 3090.24            |
| A_68_P31468065 | chr18:5334203-5334247                             | NM_178722:213      | Zfp438        | INSIDE                 | 1.460                                                        | 3.748                          | 1186.50            | 4446.93            | 5.472                          | 1077.59            | 5896.12            |
| A_68_P24438776 | chr6:50516749-50516793                            | NR_015581:129      | 5430402O13Rik | INSIDE                 | 1.459                                                        | 1.688                          | 1333.34            | 2251.10            | 2.464                          | 1109.36            | 2733.16            |
| A_68_P28553305 | chr12:77425730-77425774                           | NM_001101471:-125  | Akap5         | PROMOTER               | 1.459                                                        | 5.759                          | 2747.26            | 15821.81           | 8.404                          | 2184.46            | 18357.78           |
| A_68_P27080339 | chr10:39451377-39451421                           | NR_038037:415      | E130307A14Rik | INSIDE                 | 1.459                                                        | 2.576                          | 3212.43            | 8274.16            | 3.759                          | 2879.49            | 10823.71           |
| A_68_P21107216 | chr2:30997021-30997065                            | NM_001038700:486   | Fnbp1         | INSIDE                 | 1.459                                                        | 1.721                          | 1615.84            | 2780.84            | 2.510                          | 1425.03            | 3576.91            |
| A_68_P23510646 | chr5:17866146-17866190                            | NM_010305:63       | Gnai1         | INSIDE                 | 1.459                                                        | 2.612                          | 1092.96            | 2855.21            | 3.812                          | 932.74             | 3555.40            |
| A_68_P31381047 | chr17:80461465-80461509                           | NM_144802:188      | Hnrp1l        | INSIDE                 | 1.459                                                        | 5.020                          | 1241.74            | 6233.03            | 7.323                          | 1099.87            | 8054.72            |
| A_68_P31826505 | chr18:73732011-73732055                           | NM_001039214:-326  | Mex3c         | PROMOTER               | 1.459                                                        | 1.754                          | 2862.22            | 5019.82            | 2.558                          | 2182.65            | 5583.74            |
| A_68_P21839356 | chr2:167906923-167906967                          | NM_021409:441      | Pard6b        | INSIDE                 | 1.459                                                        | 1.612                          | 1921.41            | 3097.64            | 2.352                          | 1712.76            | 4027.98            |
| A_68_P22874082 | chr4:43888324-43888368                            | NM_016678:-55      | Reck          | PROMOTER               | 1.459                                                        | 4.573                          | 1315.45            | 6015.70            | 6.671                          | 1076.68            | 7182.01            |
| A_68_P23325608 | chr4:134487062-134487106                          | NM_026780:190      | Syf2          | INSIDE                 | 1.459                                                        | 1.768                          | 617.65             | 1092.25            | 2.580                          | 512.56             | 1322.59            |
| A_68_P30476484 | chr15:98623292-98623336                           | NM_021279:3027     | Wnt1          | INSIDE                 | 1.459                                                        | 5.005                          | 944.81             | 4728.35            | 7.304                          | 680.07             | 4966.93            |
| A_68_P23244790 | chr4:118967092-118967136                          | NM_011732:4        | Ybx1          | INSIDE                 | 1.459                                                        | 1.877                          | 4211.74            | 7907.02            | 2.739                          | 2896.16            | 7932.24            |
| A_68_P27873632 | chr11:65621027-65621071                           | NM_026107:303      | Zkscan6       | INSIDE                 | 1.459                                                        | 3.212                          | 942.34             | 3027.10            | 4.688                          | 847.63             | 3973.56            |
| A_68_P21101977 | chr2:30093187-30093231                            | NR_028299:-57      | 1700084E18Rik | DIVERGENT_PROMOTER     | 1.458                                                        | 2.115                          | 2810.65            | 5945.31            | 3.085                          | 2342.34            | 7225.85            |
| A_68_P25933298 | chr8:69010075-69010123                            | NM_025465:308      | 1810029B16Rik | INSIDE                 | 1.458                                                        | 2.297                          | 420.54             | 965.79             | 3.349                          | 366.75             | 1228.11            |
| A_68_P26273049 | chr9:3199691-3199735                              | NR_027988:101      | 4930433N12Rik | INSIDE                 | 1.458                                                        | 9.650                          | 3965.00            | 38263.77           | 14.072                         | 2614.39            | 36790.53           |
| A_68_P28002759 | chr11:88725539-88725583                           | NM_001042541:340   | Akap1         | INSIDE                 | 1.458                                                        | 1.390                          | 1362.89            | 1894.77            | 2.028                          | 1133.86            | 2298.98            |

| ProbeName       | Target position of probe on CpG island microarray | TargetID            | GeneSymbol    | CpG island Description | Ratio of relative methylation (TiO <sub>2</sub> -NP/Vehicle) | Sham group                     |                    |                    | TiO <sub>2</sub> -H group      |                    |                    |
|-----------------|---------------------------------------------------|---------------------|---------------|------------------------|--------------------------------------------------------------|--------------------------------|--------------------|--------------------|--------------------------------|--------------------|--------------------|
|                 |                                                   |                     |               |                        |                                                              | Relative methylation (Cy5/Cy3) | Cy3 signal (Input) | Cy5 signal (MeDIP) | Relative methylation (Cy5/Cy3) | Cy3 signal (Input) | Cy5 signal (MeDIP) |
| A_68_P21023862  | chr2:14976924-14976968                            | NM_029466:-42       | Arl5b         | DIVERGENT_PROMOTER     | 1.458                                                        | 1.951                          | 1371.22            | 2675.65            | 2.845                          | 1248.84            | 3552.80            |
| A_68_P227954537 | chr11:80290536-80290580                           | NM_009871:11        | Cdk5r1        | INSIDE                 | 1.458                                                        | 3.634                          | 10555.96           | 38360.57           | 5.299                          | 9525.91            | 50479.30           |
| A_68_P28202614  | chr12:4848201-4848245                             | NM_016863:179       | Fkbp1b        | INSIDE                 | 1.458                                                        | 3.457                          | 890.42             | 3078.30            | 5.040                          | 753.94             | 3799.81            |
| A_68_P29542521  | chr14:37781798-37781842                           | NM_027045:130       | Gcap14        | INSIDE                 | 1.458                                                        | 1.822                          | 1608.46            | 2930.62            | 2.657                          | 1283.32            | 3409.15            |
| A_68_P25092916  | chr7:52661724-52661768                            | NM_010596:417       | Kena7         | INSIDE                 | 1.458                                                        | 3.884                          | 1484.75            | 5766.07            | 5.663                          | 1337.18            | 7572.44            |
| A_68_P22393168  | chr3:104591684-104591728                          | NM_007484:-245      | Rhoc          | PROMOTER               | 1.458                                                        | 3.384                          | 2910.92            | 9851.91            | 4.934                          | 2172.18            | 10716.60           |
| A_68_P24939589  | chr6:148303183-148303227                          | NR_003634:27        | Rps4y2        | INSIDE                 | 1.458                                                        | 2.311                          | 403.52             | 932.55             | 3.369                          | 366.69             | 1235.46            |
| A_68_P22324942  | chr3:90193856-90193900                            | NM_011988:-29       | Slc27a3       | PROMOTER               | 1.458                                                        | 2.853                          | 781.53             | 2229.86            | 4.159                          | 719.70             | 2993.24            |
| A_68_P21328883  | chr2:72818359-72818403                            | NM_001098425:-1042  | Sp3           | PROMOTER               | 1.458                                                        | 3.094                          | 36100.64           | 111680.40          | 4.510                          | 29854.51           | 134653.00          |
| A_68_P26875611  | chr9:119920380-119920424                          | NM_011724:12314     | Xirp1         | DOWNSTREAM             | 1.458                                                        | 2.503                          | 1178.16            | 2949.18            | 3.649                          | 919.22             | 3354.32            |
| A_68_P21575995  | chr2:120389596-120389640                          | NM_011743:-51       | Zfp106        | DIVERGENT_PROMOTER     | 1.458                                                        | 2.231                          | 4259.53            | 9503.35            | 3.253                          | 3837.58            | 12482.20           |
| A_68_P21863763  | chr2:172171241-172171285                          | NM_025912:186       | 2010011I20Rik | INSIDE                 | 1.457                                                        | 2.311                          | 1062.68            | 2455.68            | 3.367                          | 931.57             | 3136.61            |
| A_68_P27843669  | chr11:60351870-60351914                           | NM_172943:708       | Alkbh5        | INSIDE                 | 1.457                                                        | 3.672                          | 929.96             | 3414.82            | 5.351                          | 763.55             | 4085.77            |
| A_68_P25957072  | chr8:74009934-74009979                            | NM_001164679:10     | Ano8          | INSIDE                 | 1.457                                                        | 1.346                          | 2736.69            | 3683.83            | 1.961                          | 2053.58            | 4026.41            |
| A_68_P28195048  | chr12:3427213-3427257                             | NM_172421:351       | Asx12         | INSIDE                 | 1.457                                                        | 3.449                          | 1549.18            | 5343.48            | 5.026                          | 1221.20            | 6137.28            |
| A_68_P28731660  | chr12:110290621-110290665                         | NM_001163175:15785  | Begain        | INSIDE                 | 1.457                                                        | 3.320                          | 520.84             | 1728.97            | 4.836                          | 521.48             | 2521.94            |
| A_68_P28082431  | chr11:102807578-102807622                         | NM_011795:175       | C1ql1         | INSIDE                 | 1.457                                                        | 6.794                          | 514.32             | 3494.08            | 9.896                          | 465.73             | 4609.07            |
| A_68_P31022586  | chr17:6987747-6987791                             | NM_009510:-639      | Ezr           | PROMOTER               | 1.457                                                        | 1.571                          | 752.56             | 1182.48            | 2.289                          | 639.94             | 1464.77            |
| A_68_P22483671  | chr3:122323019-122323074                          | NM_001114665:-461   | Fnbp11        | PROMOTER               | 1.457                                                        | 3.387                          | 944.45             | 3198.37            | 4.933                          | 826.14             | 4075.32            |
| A_68_P21052792  | chr2:20891136-20891180                            | NR_033225:658       | Gm13375       | INSIDE                 | 1.457                                                        | 4.676                          | 1729.00            | 8084.67            | 6.813                          | 1409.02            | 9600.07            |
| A_68_P25842949  | chr8:48760597-48760641                            | NM_023503:-105      | Ing2          | PROMOTER               | 1.457                                                        | 2.518                          | 1788.88            | 4503.57            | 3.668                          | 1504.15            | 5517.81            |
| A_68_P20166596  | chr1:39634041-39634085                            | NM_001033135:130    | Rnf149        | INSIDE                 | 1.457                                                        | 2.325                          | 1362.29            | 3166.74            | 3.386                          | 1243.87            | 4211.82            |
| A_68_P20638511  | chr1:137180229-137180273                          | NM_001159624:411    | Rnpep         | INSIDE                 | 1.457                                                        | 2.202                          | 1517.55            | 3341.03            | 3.207                          | 1262.64            | 4049.56            |
| A_68_P30970962  | chr16:92698887-92698931                           | NM_001111023:-1335  | Rumx1         | PROMOTER               | 1.457                                                        | 1.835                          | 641.32             | 1176.91            | 2.675                          | 530.30             | 1418.40            |
| A_68_P24803059  | chr6:121195955-121195999                          | NM_011909:53        | Usp18         | INSIDE                 | 1.457                                                        | 2.204                          | 926.39             | 2041.83            | 3.212                          | 1000.99            | 3215.04            |
| A_68_P26815586  | chr9:108481063-108481107                          | NM_031392:-83       | Wdr6          | PROMOTER               | 1.457                                                        | 2.069                          | 1765.90            | 3654.08            | 3.015                          | 1426.63            | 4301.72            |
| A_68_P23575215  | chr5:31191120-31191164                            | NM_174849:-82       | Aglb15        | PROMOTER               | 1.456                                                        | 2.933                          | 607.02             | 1780.58            | 4.272                          | 413.55             | 1766.63            |
| A_68_P33005169  | chr7:3366442-33664487                             | NM_133189:29780     | Caeng7        | INSIDE                 | 1.456                                                        | 1.529                          | 1339.66            | 2048.53            | 2.227                          | 991.30             | 2207.71            |
| A_68_P23792211  | chr5:72895109-72895153                            | NM_016869:317       | Corin         | INSIDE                 | 1.456                                                        | 1.865                          | 1598.60            | 2981.29            | 2.716                          | 1215.77            | 3302.39            |
| A_68_P23416728  | chr4:151505797-151505841                          | NM_019585:-2784     | Espn          | PROMOTER               | 1.456                                                        | 1.612                          | 1539.60            | 2481.95            | 2.346                          | 1367.83            | 3209.46            |
| A_68_P30630418  | chr16:28446840-28446884                           | NM_183064:-1549     | Fgf12         | PROMOTER               | 1.456                                                        | 2.036                          | 569.25             | 1158.74            | 2.964                          | 537.05             | 1591.64            |
| A_68_P29388379  | chr14:9046505-9046549                             | NM_027782:-135      | Kctd6         | PROMOTER               | 1.456                                                        | 6.924                          | 4007.28            | 27747.18           | 10.079                         | 3170.03            | 31951.83           |
| A_68_P24325043  | chr6:29129618-29129662                            | NM_001101443:-56    | Prrt4         | PROMOTER               | 1.456                                                        | 7.255                          | 8481.06            | 61526.61           | 10.564                         | 6185.29            | 65343.71           |
| A_68_P31102749  | chr17:25410196-25410240                           | NM_001177610:158    | Ube2i         | INSIDE                 | 1.456                                                        | 2.075                          | 1046.40            | 2171.19            | 3.020                          | 923.66             | 2789.66            |
| A_68_P27997644  | chr11:87881461-87881505                           | NM_016686:-360      | Vezf1         | PROMOTER               | 1.456                                                        | 1.830                          | 2438.54            | 4462.54            | 2.665                          | 2358.99            | 6286.77            |
| A_68_P23957857  | chr5:106305585-106305629                          | NM_018759:20        | Zfp326        | INSIDE                 | 1.456                                                        | 2.246                          | 415.39             | 932.83             | 3.269                          | 423.88             | 1385.76            |
| A_68_P31134871  | chr17:30713349-30713393                           | NM_027060:-138      | Btbd9         | PROMOTER               | 1.455                                                        | 2.181                          | 1117.76            | 2438.28            | 3.173                          | 1010.81            | 3207.63            |
| A_68_P24993219  | chr7:20006500-20006544                            | NM_007710:10080     | Ckm           | INSIDE                 | 1.455                                                        | 2.148                          | 1288.84            | 2768.37            | 3.125                          | 1070.58            | 3345.70            |
| A_68_P23345560  | chr4:137951782-137951826                          | NM_001081672:569    | Fam43b        | INSIDE                 | 1.455                                                        | 3.959                          | 706.97             | 2799.21            | 5.763                          | 601.77             | 3467.91            |
| A_68_P23582152  | chr5:32437568-32437612                            | NM_008037:-1254     | Fosl2         | PROMOTER               | 1.455                                                        | 4.137                          | 641.42             | 2653.38            | 6.018                          | 616.21             | 3708.17            |
| A_68_P31515586  | chr18:15222359-15222403                           | NM_001142731:-289   | Kctd1         | PROMOTER               | 1.455                                                        | 1.733                          | 1386.30            | 2403.07            | 2.523                          | 1097.60            | 2769.12            |
| A_68_P27785188  | chr11:49660391-49660435                           | NM_001163671:160    | Mapk9         | INSIDE                 | 1.455                                                        | 1.566                          | 1886.97            | 2955.07            | 2.278                          | 1586.85            | 3614.59            |
| A_68_P25981540  | chr8:79709769-79709813                            | NM_001083906:283384 | Nr3c2         | INSIDE                 | 1.455                                                        | 3.288                          | 943.76             | 3102.85            | 4.785                          | 725.24             | 3470.35            |
| A_68_P20163208  | chr11:39044668-39044712                           | NM_026850:32        | Pdcl3         | INSIDE                 | 1.455                                                        | 3.480                          | 2919.10            | 10159.42           | 5.065                          | 2028.94            | 10275.96           |
| A_68_P27430008  | chr10:107599648-107599692                         | NM_027892:215       | Ppp1r12a      | INSIDE                 | 1.455                                                        | 2.288                          | 1378.25            | 3153.33            | 3.330                          | 1209.49            | 4027.44            |
| A_68_P24691288  | chr6:100237003-100237047                          | NM_019743:328       | Rybp          | INSIDE                 | 1.455                                                        | 3.187                          | 1046.04            | 3333.77            | 4.638                          | 817.40             | 3791.10            |
| A_68_P22286842  | chr3:83569940-83569984                            | NM_009144:-280      | Sfrp2         | PROMOTER               | 1.455                                                        | 1.712                          | 2189.69            | 3748.71            | 2.492                          | 1691.78            | 4215.27            |
| A_68_P29052701  | chr13:55097633-55097677                           | NM_153131:46862     | Unc5a         | INSIDE                 | 1.455                                                        | 2.295                          | 1681.83            | 3859.82            | 3.339                          | 1344.53            | 4489.11            |
| A_68_P24979386  | chr7:16647485-16647529                            | NM_001099277:-9784  | Zfp541        | PROMOTER               | 1.455                                                        | 3.901                          | 6432.66            | 25096.37           | 5.677                          | 4589.99            | 26058.32           |
| A_68_P30379093  | chr15:81524108-81524152                           | NM_001164320:3587   | Chadl         | INSIDE                 | 1.454                                                        | 3.450                          | 292.29             | 1008.53            | 5.017                          | 330.10             | 1656.11            |
| A_68_P24818548  | chr6:125031803-125031847                          | NM_001163268:10530  | Lpar5         | INSIDE                 | 1.454                                                        | 1.700                          | 1581.55            | 2689.12            | 2.473                          | 1399.54            | 3460.97            |

| ProbeName      | Target position of probe on CpG island microarray | TargetID                | GeneSymbol    | CpG island Description | Ratio of relative methylation (TiO <sub>2</sub> -NP/Vehicle) | Sham group                     |                    |                    | TiO <sub>2</sub> -H group      |                    |                    |
|----------------|---------------------------------------------------|-------------------------|---------------|------------------------|--------------------------------------------------------------|--------------------------------|--------------------|--------------------|--------------------------------|--------------------|--------------------|
|                |                                                   |                         |               |                        |                                                              | Relative methylation (Cy5/Cy3) | Cy3 signal (Input) | Cy5 signal (MeDIP) | Relative methylation (Cy5/Cy3) | Cy3 signal (Input) | Cy5 signal (MeDIP) |
| A_68_P23227558 | chr4:115748182-115748226                          | NM_153521:135           | Lrrc41        | INSIDE                 | 1.454                                                        | 3.338                          | 1274.86            | 4255.23            | 4.853                          | 1149.75            | 5579.65            |
| A_68_P21780569 | chr2:157854821-157854865                          | NM_027434:313           | Rprd1b        | INSIDE                 | 1.454                                                        | 1.517                          | 1485.79            | 2254.60            | 2.206                          | 1097.49            | 2420.89            |
| A_68_P31331151 | chr17:71202362-71202406                           | NM_001164075-1310       | Tgflf1        | PROMOTER               | 1.454                                                        | 2.468                          | 1761.00            | 4345.77            | 3.589                          | 1299.47            | 4663.50            |
| A_68_P25850571 | chr8:49928417-49928461                            | AK013771:58             |               | INSIDE                 | 1.454                                                        | 2.771                          | 1314.67            | 3642.66            | 4.028                          | 1193.16            | 4806.45            |
| A_68_P32217229 | chr19:59150385-59150429                           | NM_001114312:153        | 4930506M07Rik | INSIDE                 | 1.453                                                        | 1.820                          | 399.24             | 726.66             | 2.645                          | 346.26             | 915.90             |
| A_68_P31053606 | chr17:12934729-12934773                           | NR_002853:574           | Aim           | INSIDE                 | 1.453                                                        | 3.100                          | 634.08             | 1965.72            | 4.503                          | 625.99             | 2819.07            |
| A_68_P28925107 | chr13:31900007-31900051                           | NM_008592:1514          | Foxc1         | INSIDE                 | 1.453                                                        | 2.368                          | 1067.03            | 2527.10            | 3.441                          | 888.61             | 3058.02            |
| A_68_P29660091 | chr14:63865134-63865179                           | NM_008092:-1059         | Gata4         | PROMOTER               | 1.453                                                        | 7.098                          | 511.45             | 3630.21            | 10.310                         | 404.51             | 4170.34            |
| A_68_P22898182 | chr4:48060289-48060333                            | NM_015743:-3809         | Nr4a3         | PROMOTER               | 1.453                                                        | 2.764                          | 766.56             | 2118.88            | 4.017                          | 589.66             | 2368.92            |
| A_68_P26574084 | chr9:62990320-62990364                            | NM_172446:4445          | Skor1         | INSIDE                 | 1.453                                                        | 2.763                          | 1499.36            | 4143.06            | 4.015                          | 1218.84            | 4894.05            |
| A_68_P28938195 | chr13:34436488-34436532                           | NM_001033167:541        | Slc22a23      | INSIDE                 | 1.453                                                        | 2.762                          | 403.59             | 1114.57            | 4.014                          | 358.05             | 1437.23            |
| A_68_P24118171 | chr5:136328011-136328055                          | NM_021403:34057         | Srrm3         | INSIDE                 | 1.453                                                        | 3.840                          | 1032.86            | 3965.69            | 5.579                          | 906.14             | 5055.25            |
| A_68_P21751498 | chr2:152673870-152673914                          | NM_001141975:193        | Tpx2          | INSIDE                 | 1.453                                                        | 2.514                          | 2648.33            | 6656.99            | 3.651                          | 2122.21            | 7748.70            |
| A_68_P24979385 | chr7:16647414-16647458                            | NM_001099277:-9854      | Zfp541        | PROMOTER               | 1.453                                                        | 4.543                          | 2956.79            | 13432.03           | 6.600                          | 2184.19            | 14415.65           |
| A_68_P25174399 | chr7:71082777-71082821                            | NM_021366:1003          | Klfl3         | INSIDE                 | 1.452                                                        | 4.175                          | 3133.31            | 13082.74           | 6.062                          | 2360.67            | 14310.05           |
| A_68_P22887154 | chr4:46151513-46151557                            | NM_001033201:152        | Nebp1         | INSIDE                 | 1.452                                                        | 1.423                          | 840.75             | 1196.44            | 2.066                          | 754.96             | 1559.62            |
| A_68_P27230706 | chr10:70062237-70062281                           | NM_178621:-219          | Phyhipl       | PROMOTER               | 1.452                                                        | 2.073                          | 7987.04            | 16559.84           | 3.011                          | 6789.13            | 20438.82           |
| A_68_P32785482 | chrX:158155524-158155568                          | NM_198409:62            | Rai2          | INSIDE                 | 1.452                                                        | 4.180                          | 1229.62            | 5140.23            | 6.068                          | 905.40             | 5493.85            |
| A_68_P20157823 | chr1:38186758-38186802                            | NM_019570:-273          | Rev1          | PROMOTER               | 1.452                                                        | 2.296                          | 1303.21            | 2992.19            | 3.335                          | 1132.40            | 3776.31            |
| A_68_P22753435 | chr4:16090304-16090348                            | NM_138952:319           | Ripk2         | INSIDE                 | 1.452                                                        | 2.680                          | 1070.14            | 2867.87            | 3.891                          | 950.19             | 3697.39            |
| A_68_P20885441 | chr1:184054789-184054833                          | NM_012058:-57           | Srp9          | PROMOTER               | 1.452                                                        | 2.437                          | 1536.69            | 3744.66            | 3.539                          | 1275.05            | 4512.09            |
| A_68_P24954139 | chr7:6084115-6084159                              | NM_001013012:23437      | Zfp787        | INSIDE                 | 1.452                                                        | 2.746                          | 1342.01            | 3685.47            | 3.988                          | 1257.91            | 5016.35            |
| A_68_P30284251 | chr15:64752515-64752559                           | NM_009623:1322          | Adecy8        | INSIDE                 | 1.451                                                        | 3.100                          | 1343.62            | 4165.22            | 4.499                          | 1107.10            | 4981.16            |
| A_68_P20886156 | chr1:184271169-184271213                          | NM_175127:547           | Fbxo28        | INSIDE                 | 1.451                                                        | 2.477                          | 645.07             | 1597.68            | 3.593                          | 543.63             | 1953.12            |
| A_68_P21840388 | chr2:168088389-168088433                          | NM_001081134:6421       | Keng1         | INSIDE                 | 1.451                                                        | 1.671                          | 942.82             | 1575.61            | 2.425                          | 706.71             | 1713.57            |
| A_68_P25176078 | chr7:71432596-71432640                            | NM_172742:63            | Mtmr10        | INSIDE                 | 1.451                                                        | 1.816                          | 781.96             | 1419.94            | 2.635                          | 718.56             | 1893.58            |
| A_68_P23239263 | chr4:117933446-117933490                          | NM_0011213:30534        | Ptprf         | INSIDE                 | 1.451                                                        | 6.603                          | 3880.11            | 25620.73           | 9.581                          | 3001.41            | 28755.82           |
| A_68_P21476820 | chr2:102240650-102240694                          | NM_020267:385           | Trim44        | INSIDE                 | 1.451                                                        | 2.474                          | 373.14             | 923.15             | 3.591                          | 352.20             | 1264.71            |
| A_68_P30570063 | chr16:16599690-16599734                           | ENSMUST00000162671:359  |               | INSIDE                 | 1.451                                                        | 4.347                          | 10461.80           | 45473.02           | 6.307                          | 7454.08            | 47015.58           |
| A_68_P24816769 | chr6:124695789-124695833                          | NM_007881:10695         | Atn1          | INSIDE                 | 1.450                                                        | 6.660                          | 552.01             | 3676.21            | 9.657                          | 451.90             | 4364.14            |
| A_68_P26600872 | chr9:67607645-67607689                            | NM_001081314:423        | C2cd4b        | INSIDE                 | 1.450                                                        | 3.347                          | 1542.11            | 5161.61            | 4.852                          | 1305.26            | 6332.76            |
| A_68_P25954643 | chr8:73397351-73397395                            | NM_026964:17            | Ccdc124       | INSIDE                 | 1.450                                                        | 1.547                          | 1591.20            | 2461.74            | 2.243                          | 1363.71            | 3058.24            |
| A_68_P24334443 | chr6:30846924-30846968                            | NM_017478:-186          | Copg2         | PROMOTER               | 1.450                                                        | 6.673                          | 2212.72            | 14766.05           | 9.679                          | 1733.39            | 16776.79           |
| A_68_P32092666 | chr19:36993233-36993277                           | NM_028263:835           | Fgfbp3        | INSIDE                 | 1.450                                                        | 6.685                          | 1885.91            | 12606.49           | 9.692                          | 1657.17            | 16061.23           |
| A_68_P24610513 | chr6:86475289-86475333                            | NM_011865:849           | Pcbp1         | INSIDE                 | 1.450                                                        | 3.509                          | 1375.79            | 4827.22            | 5.088                          | 1197.78            | 6094.21            |
| A_68_P25092562 | chr7:52601979-52602025                            | NM_029741:20387         | Ppfa3         | INSIDE                 | 1.450                                                        | 7.101                          | 288.86             | 2051.21            | 10.300                         | 297.84             | 3067.79            |
| A_68_P24090826 | chr5:130293163-130293207                          | NM_133900:-55           | Psph          | DIVERGENT_PROMOTER     | 1.450                                                        | 3.228                          | 1767.44            | 5705.91            | 4.680                          | 1507.77            | 7055.94            |
| A_68_P27325556 | chr10:87922749-87922793                           | NM_011517:439           | Sycp3         | INSIDE                 | 1.450                                                        | 9.760                          | 7040.68            | 68715.96           | 14.156                         | 4470.72            | 63288.14           |
| A_68_P25011335 | chr7:26473118-26473162                            | NM_011577:1120          | Tgfb1         | INSIDE                 | 1.450                                                        | 4.692                          | 406.37             | 1906.80            | 6.804                          | 351.15             | 2389.26            |
| A_68_P20302822 | chr1:66514910-66514954                            | NM_175510:-88           | Unc80         | PROMOTER               | 1.450                                                        | 1.796                          | 1118.10            | 2008.23            | 2.605                          | 909.12             | 2368.43            |
| A_68_P26084570 | chr8:98201548-98201592                            | ENSMUST00000041318:-414 |               | PROMOTER               | 1.450                                                        | 1.955                          | 3405.68            | 6657.29            | 2.835                          | 2737.00            | 7759.89            |
| A_68_P23328301 | chr4:134954162-134954206                          | NM_001168500:-42        | A330049M08Rik | PROMOTER               | 1.449                                                        | 2.446                          | 11938.32           | 29200.64           | 3.544                          | 9050.21            | 32075.46           |
| A_68_P23264562 | chr4:123427164-123427208                          | NM_023423:356           | Akirin1       | INSIDE                 | 1.449                                                        | 3.460                          | 686.55             | 2375.57            | 5.014                          | 603.99             | 3028.44            |
| A_68_P24120341 | chr5:136751221-136751265                          | NM_198602:292033        | Cux1          | INSIDE                 | 1.449                                                        | 2.086                          | 434.49             | 906.44             | 3.023                          | 389.30             | 1176.94            |
| A_68_P28072079 | chr11:100980744-100980788                         | NM_026501:372           | Fam134c       | INSIDE                 | 1.449                                                        | 2.544                          | 5815.49            | 14794.36           | 3.687                          | 3975.99            | 14659.23           |
| A_68_P27787811 | chr11:50105373-50105417                           | NM_175334:444           | Mam11         | INSIDE                 | 1.449                                                        | 1.874                          | 448.97             | 841.25             | 2.716                          | 406.52             | 1103.98            |
| A_68_P31296462 | chr17:64950677-64950721                           | NM_008549:-290          | Man2a1        | PROMOTER               | 1.449                                                        | 3.363                          | 771.63             | 2595.34            | 4.873                          | 652.61             | 3180.49            |
| A_68_P23318794 | chr4:133228762-133228806                          | NM_001145955:-222       | Pigv          | PROMOTER               | 1.449                                                        | 2.193                          | 1112.08            | 2438.55            | 3.177                          | 1046.86            | 3326.16            |
| A_68_P28956736 | chr13:37918899-37918943                           | NM_001039188:-341       | Rreb1         | PROMOTER               | 1.449                                                        | 7.469                          | 673.49             | 5030.59            | 10.824                         | 647.42             | 7007.82            |
| A_68_P21101100 | chr2:29918302-29918346                            | NM_001204875:-3669      | Set           | PROMOTER               | 1.449                                                        | 3.154                          | 2323.74            | 7328.64            | 4.570                          | 1936.20            | 8849.05            |
| A_68_P25618724 | chr8:4779472-4779516                              | NM_011369:40            | Shebp1        | INSIDE                 | 1.449                                                        | 2.534                          | 676.91             | 1715.14            | 3.672                          | 595.88             | 2188.15            |

| ProbeName      | Target position of probe on CpG island microarray | TargetID               | GeneSymbol    | CpG island Description | Ratio of relative methylation (TiO <sub>2</sub> -NP/Vehicle) | Sham group                     |                    |                    | TiO <sub>2</sub> -H group      |                    |                    |
|----------------|---------------------------------------------------|------------------------|---------------|------------------------|--------------------------------------------------------------|--------------------------------|--------------------|--------------------|--------------------------------|--------------------|--------------------|
|                |                                                   |                        |               |                        |                                                              | Relative methylation (Cy5/Cy3) | Cy3 signal (Input) | Cy5 signal (MeDIP) | Relative methylation (Cy5/Cy3) | Cy3 signal (Input) | Cy5 signal (MeDIP) |
| A_68_P31259834 | chr17:57199854-57199898                           | NM_025877:-590         | Slc25a23      | DIVERGENT_PROMOTER     | 1.449                                                        | 2.701                          | 1618.44            | 4371.00            | 3.912                          | 1334.36            | 5220.64            |
| A_68_P26828805 | chr9:111214091-111214135                          | NM_001164659:-130      | Trank1        | PROMOTER               | 1.449                                                        | 1.976                          | 1514.65            | 2993.04            | 2.863                          | 1318.17            | 3774.06            |
| A_68_P23195055 | chr4:107890802-107890861                          | NM_001167936:-304      | Zyg11a        | PROMOTER               | 1.449                                                        | 1.839                          | 675.01             | 1241.37            | 2.664                          | 614.10             | 1636.04            |
| A_68_P26016847 | chr8:86399178-86399222                            |                        |               | Unknown                | 1.449                                                        | 2.692                          | 1231.64            | 3315.53            | 3.901                          | 1043.50            | 4070.90            |
| A_68_P21040878 | chr2:18610287-18610336                            | NM_007552:11667        | Bmi1          | DOWNSTREAM             | 1.448                                                        | 3.632                          | 294.61             | 1069.87            | 5.260                          | 290.08             | 1525.82            |
| A_68_P28068816 | chr11:100436337-100436381                         | NM_001146318:-846      | Cnp           | PROMOTER               | 1.448                                                        | 2.750                          | 627.90             | 1726.48            | 3.980                          | 661.69             | 2633.81            |
| A_68_P27480860 | chr10:116813708-116813752                         | NM_001013391:299       | Cpsf6         | INSIDE                 | 1.448                                                        | 1.714                          | 752.02             | 1289.24            | 2.483                          | 783.49             | 1945.15            |
| A_68_P25470625 | chr7:127986822-127986866                          | NM_007908:448          | Eef2k         | INSIDE                 | 1.448                                                        | 2.070                          | 1084.98            | 2245.87            | 2.996                          | 836.11             | 2505.35            |
| A_68_P23250309 | chr4:119940503-119940547                          | NM_194060:19342        | Foxo6         | INSIDE                 | 1.448                                                        | 2.395                          | 1510.25            | 3616.72            | 3.469                          | 1410.17            | 4891.28            |
| A_68_P27284036 | chr10:80031664-80031708                           | NM_078477:8355         | Klf16         | INSIDE                 | 1.448                                                        | 4.069                          | 2311.53            | 9405.84            | 5.892                          | 1831.43            | 10791.15           |
| A_68_P21375628 | chr2:80421369-80421413                            | NM_016965:-268         | Nekap1        | PROMOTER               | 1.448                                                        | 2.306                          | 83389.97           | 192305.90          | 3.338                          | 68067.69           | 227227.30          |
| A_68_P31208523 | chr17:46849258-46849302                           | NM_145488:869          | Pex6          | INSIDE                 | 1.448                                                        | 1.798                          | 581.56             | 1045.46            | 2.602                          | 550.63             | 1432.93            |
| A_68_P21585947 | chr2:122174316-122174360                          | NM_001013829:20316     | Shf           | DOWNSTREAM             | 1.448                                                        | 2.057                          | 1047.19            | 2154.30            | 2.979                          | 855.43             | 2548.27            |
| A_68_P20372367 | chr1:78654608-78654652                            | NM_001136226:-384      | Utp14b        | PROMOTER               | 1.448                                                        | 3.668                          | 1579.09            | 5791.38            | 5.311                          | 1255.14            | 6665.96            |
| A_68_P25507825 | chr7:135020108-135020152                          | NM_146259:207          | Zfp668        | INSIDE                 | 1.448                                                        | 3.589                          | 1357.92            | 4874.13            | 5.198                          | 1099.79            | 5716.33            |
| A_68_P25533783 | chr7:139508008-139508052                          | NR_028578:684          | Gm10584       | INSIDE                 | 1.447                                                        | 2.447                          | 855.09             | 2092.47            | 3.541                          | 701.10             | 2482.34            |
| A_68_P23339947 | chr4:137024556-137024600                          | NM_008305:-139         | Hspg2         | PROMOTER               | 1.447                                                        | 2.626                          | 2329.40            | 6116.84            | 3.800                          | 1884.70            | 7162.11            |
| A_68_P25111228 | chr7:56501603-56501647                            | NM_175272:66           | Nav2          | INSIDE                 | 1.447                                                        | 2.135                          | 576.28             | 1230.09            | 3.089                          | 435.18             | 1344.10            |
| A_68_P25949903 | chr8:72635987-72636031                            | NM_007789:8735         | Nean          | INSIDE                 | 1.447                                                        | 3.122                          | 2376.67            | 7419.26            | 4.517                          | 1958.07            | 8844.04            |
| A_68_P27835020 | chr11:58948880-58948924                           | NM_001171512:975       | Obscn         | INSIDE                 | 1.447                                                        | 1.743                          | 2129.04            | 3710.06            | 2.522                          | 1679.01            | 4233.84            |
| A_68_P30250724 | chr15:58721209-58721253                           | NM_175226:447          | Rnf139        | INSIDE                 | 1.447                                                        | 2.050                          | 2787.49            | 5714.56            | 2.967                          | 2205.36            | 6543.37            |
| A_68_P31841968 | chr18:76400994-76401038                           | NM_010754:-562         | Smad2         | PROMOTER               | 1.447                                                        | 2.698                          | 713.64             | 1925.68            | 3.906                          | 649.33             | 2536.17            |
| A_68_P31349753 | chr17:74397223-74397267                           | NM_053188:12           | Srd5a2        | INSIDE                 | 1.447                                                        | 1.986                          | 2811.36            | 5582.34            | 2.873                          | 2314.99            | 6652.02            |
| A_68_P27833865 | chr11:58791958-58792002                           | NM_053168:363          | Trim11        | INSIDE                 | 1.447                                                        | 2.868                          | 2392.15            | 6859.83            | 4.148                          | 2095.30            | 8691.42            |
| A_68_P23429340 | chr4:153516608-153516652                          | NM_021499:150          | Wdr8          | INSIDE                 | 1.447                                                        | 1.822                          | 1735.19            | 3162.07            | 2.637                          | 1489.55            | 3928.05            |
| A_68_P22289849 | chr3:84063343-84063387                            | ENSMUST00000147901:-73 |               | PROMOTER               | 1.447                                                        | 1.594                          | 959.99             | 1529.97            | 2.306                          | 753.69             | 1737.68            |
| A_68_P22659832 | chr3:153607334-153607378                          | NM_007382:40           | Acadm         | INSIDE                 | 1.446                                                        | 1.899                          | 4802.21            | 9120.06            | 2.746                          | 3718.40            | 10209.88           |
| A_68_P31151211 | chr17:34088231-34088275                           | NM_019420:181          | B3galt4       | INSIDE                 | 1.446                                                        | 2.006                          | 3132.92            | 6285.11            | 2.900                          | 2383.16            | 6911.87            |
| A_68_P24982502 | chr7:17200404-17200448                            | NM_172739:-84          | Grfl1         | PROMOTER               | 1.446                                                        | 1.896                          | 1027.80            | 1948.83            | 2.742                          | 911.75             | 2500.28            |
| A_68_P25678159 | chr8:15011427-15011471                            | NM_029116:424          | Kbtbd11       | INSIDE                 | 1.446                                                        | 2.572                          | 2572.51            | 6616.93            | 3.719                          | 2184.53            | 8123.62            |
| A_68_P28246310 | chr12:12948750-12948795                           | NM_008709:-130         | Mycn          | PROMOTER               | 1.446                                                        | 4.960                          | 400.32             | 1985.49            | 7.170                          | 370.26             | 2654.57            |
| A_68_P21839353 | chr2:167906491-167906535                          | NM_021409:9            | Pard6b        | INSIDE                 | 1.446                                                        | 4.552                          | 2533.08            | 11530.95           | 6.580                          | 2153.19            | 14168.50           |
| A_68_P23271971 | chr4:124743753-124743797                          | NM_175246:-162         | Snip1         | DIVERGENT_PROMOTER     | 1.446                                                        | 3.096                          | 1982.96            | 6139.75            | 4.479                          | 1676.90            | 7509.98            |
| A_68_P25362157 | chr7:106632148-106632192                          | NR_002172:-728         | Snord15a      | PROMOTER               | 1.446                                                        | 7.682                          | 550.34             | 4227.67            | 11.109                         | 510.90             | 5675.68            |
| A_68_P20799884 | chr1:168309567-168309611                          | NM_030245:291          | Tada1         | INSIDE                 | 1.446                                                        | 1.471                          | 1502.42            | 2210.58            | 2.127                          | 1239.05            | 2635.54            |
| A_68_P27556189 | chr11:4087040-4087084                             | NM_134023:227          | Tbc1d10a      | INSIDE                 | 1.446                                                        | 1.590                          | 1408.80            | 2239.65            | 2.298                          | 1044.86            | 2401.22            |
| A_68_P24117669 | chr5:136219992-136220036                          | NM_172541:28           | Tmem120a      | INSIDE                 | 1.446                                                        | 2.355                          | 751.09             | 1768.70            | 3.406                          | 556.39             | 1894.83            |
| A_68_P31501880 | chr18:12802925-12802969                           | NM_028341:905          | Ttc39c        | INSIDE                 | 1.446                                                        | 2.736                          | 2149.54            | 5880.10            | 3.955                          | 1685.22            | 6664.96            |
| A_68_P31801896 | chr18:69358080-69358124                           | AK080553:328           |               | INSIDE                 | 1.446                                                        | 1.594                          | 5420.38            | 8640.82            | 2.306                          | 3539.97            | 8162.16            |
| A_68_P26631263 | chr9:72951130-72951174                            | NM_025890:948          | 2410004A20Rik | INSIDE                 | 1.445                                                        | 2.753                          | 1723.42            | 4744.36            | 3.977                          | 1485.00            | 5905.53            |
| A_68_P28183249 | chr11:120098316-120098360                         | NM_198423:4078         | Bahcc1        | INSIDE                 | 1.445                                                        | 3.233                          | 1865.23            | 6030.16            | 4.672                          | 1598.00            | 7465.76            |
| A_68_P26613990 | chr9:69837096-69837140                            | NM_016787:-189         | Bnip2         | PROMOTER               | 1.445                                                        | 2.128                          | 1610.94            | 3428.29            | 3.075                          | 1296.90            | 3988.08            |
| A_68_P21084948 | chr2:27330582-27330626                            | NM_023336:314          | Brd3          | INSIDE                 | 1.445                                                        | 1.974                          | 1939.64            | 3827.94            | 2.851                          | 1524.89            | 4347.46            |
| A_68_P28109101 | chr11:107655547-107655591                         | NM_019431:210          | Caeng4        | INSIDE                 | 1.445                                                        | 2.543                          | 2098.32            | 5336.33            | 3.675                          | 1621.04            | 5956.95            |
| A_68_P31097739 | chr17:24643626-24643670                           | NM_027937:17921        | Caskin1       | INSIDE                 | 1.445                                                        | 2.261                          | 3569.09            | 8069.63            | 3.267                          | 2568.06            | 8389.01            |
| A_68_P31253493 | chr17:56179827-56179871                           | NM_013733:10           | Chaf1a        | INSIDE                 | 1.445                                                        | 1.436                          | 1683.65            | 2417.12            | 2.075                          | 1388.40            | 2880.67            |
| A_68_P28099218 | chr11:105898189-105898233                         | NM_027946:25           | Deaf7         | INSIDE                 | 1.445                                                        | 1.560                          | 1245.12            | 1942.89            | 2.255                          | 1031.77            | 2327.05            |
| A_68_P21978659 | chr3:20054868-20054912                            | NM_013755:105          | Gyg           | INSIDE                 | 1.445                                                        | 3.474                          | 1014.97            | 3526.07            | 5.021                          | 916.63             | 4602.41            |
| A_68_P25574932 | chr7:146132973-146133017                          | NM_028708:562          | Jakmp3        | INSIDE                 | 1.445                                                        | 2.076                          | 1303.86            | 2707.15            | 3.000                          | 1108.06            | 3324.63            |
| A_68_P30575876 | chr16:17815718-17815762                           | NM_153790:18366        | Scar2         | DOWNSTREAM             | 1.445                                                        | 1.579                          | 675.06             | 1065.85            | 2.282                          | 643.83             | 1468.97            |
| A_68_P22086571 | chr3:41546266-41546310                            | NM_001081411:148       | Sclt1         | INSIDE                 | 1.445                                                        | 2.216                          | 402.28             | 891.35             | 3.201                          | 350.35             | 1121.43            |

| ProbeName      | Target position of probe on CpG island microarray | TargetID               | GeneSymbol    | CpG island Description | Ratio of relative methylation (TiO <sub>2</sub> -NP/Vehicle) | Sham group                     |                    |                    | TiO <sub>2</sub> -H group      |                    |                    |
|----------------|---------------------------------------------------|------------------------|---------------|------------------------|--------------------------------------------------------------|--------------------------------|--------------------|--------------------|--------------------------------|--------------------|--------------------|
|                |                                                   |                        |               |                        |                                                              | Relative methylation (Cy5/Cy3) | Cy3 signal (Input) | Cy5 signal (MeDIP) | Relative methylation (Cy5/Cy3) | Cy3 signal (Input) | Cy5 signal (MeDIP) |
| A_68_P21070644 | chr2:25079420-25079464                            | NM_146116:780          | Tubb2c        | INSIDE                 | 1.445                                                        | 3.611                          | 2212.18            | 7987.44            | 5.218                          | 1676.25            | 8746.17            |
| A_68_P24974292 | chr7:13623438-13623482                            | NM_145578:-133         | Ube2m         | PROMOTER               | 1.445                                                        | 2.605                          | 1051.12            | 2738.68            | 3.765                          | 888.60             | 3345.28            |
| A_68_P28221330 | chr12:8309173-8309217                             | NM_013527:-434         | Gd7f          | PROMOTER               | 1.444                                                        | 1.733                          | 2430.71            | 4211.45            | 2.501                          | 1763.10            | 4409.85            |
| A_68_P32454253 | chrX:68809673-68809717                            | NM_008253:527          | Hmgb3         | INSIDE                 | 1.444                                                        | 1.957                          | 1150.23            | 2251.28            | 2.827                          | 601.95             | 1701.70            |
| A_68_P20619890 | chr1:134086976-134087020                          | NM_001033250:-1014     | Lemd1         | PROMOTER               | 1.444                                                        | 3.065                          | 1704.52            | 5224.81            | 4.427                          | 1248.97            | 5528.78            |
| A_68_P22373271 | chr3:100914318-100914362                          | NM_011197:-251         | Ptgfrn        | PROMOTER               | 1.444                                                        | 1.657                          | 1507.39            | 2498.00            | 2.393                          | 1256.15            | 3006.40            |
| A_68_P24119330 | chr5:136559824-136559868                          | NM_133914:61           | Rasa4         | INSIDE                 | 1.444                                                        | 4.408                          | 4686.10            | 20657.71           | 6.364                          | 3329.09            | 21186.54           |
| A_68_P25186098 | chr7:73205391-73205435                            | NM_021336:191          | Snrpa1        | INSIDE                 | 1.444                                                        | 2.115                          | 2902.41            | 6138.04            | 3.054                          | 2257.62            | 6894.17            |
| A_68_P24040430 | chr5:121161722-121161766                          | NM_008052:-66          | Dtx1          | PROMOTER               | 1.443                                                        | 2.128                          | 2505.95            | 5332.54            | 3.070                          | 1996.93            | 6129.86            |
| A_68_P31473580 | chr18:6490337-6490381                             | NM_027497:496          | Epc1          | INSIDE                 | 1.443                                                        | 1.556                          | 1551.72            | 2413.95            | 2.245                          | 1453.93            | 3264.77            |
| A_68_P28576808 | chr12:81744517-81744561                           | NM_007951:310          | Erh           | INSIDE                 | 1.443                                                        | 4.662                          | 1605.88            | 7487.33            | 6.729                          | 1315.59            | 8852.28            |
| A_68_P26065141 | chr8:94882239-94882283                            | NM_018826:566          | Irx5          | INSIDE                 | 1.443                                                        | 1.717                          | 2239.54            | 3846.36            | 2.478                          | 1825.56            | 4524.24            |
| A_68_P32508788 | chrX:83437640-83437684                            | NM_007430:549          | Nr0b1         | INSIDE                 | 1.443                                                        | 1.851                          | 606.34             | 1122.20            | 2.671                          | 315.94             | 843.85             |
| A_68_P29753344 | chr14:80169969-80170013                           | NM_001042726:1129      | Pcdh8         | INSIDE                 | 1.443                                                        | 1.983                          | 980.90             | 1944.81            | 2.861                          | 881.14             | 2520.64            |
| A_68_P21836026 | chr2:167363834-167363878                          | NM_011427:130          | Snai1         | INSIDE                 | 1.443                                                        | 2.092                          | 3308.02            | 6921.51            | 3.019                          | 2522.35            | 7614.93            |
| A_68_P31251408 | chr17:55621977-55622021                           | NM_172829:36984        | St6gal2       | INSIDE                 | 1.443                                                        | 2.069                          | 709.30             | 1467.20            | 2.985                          | 670.32             | 2001.04            |
| A_68_P31753941 | chr18:61008559-61008603                           | NM_001198984:38        | Tcof1         | INSIDE                 | 1.443                                                        | 1.590                          | 814.67             | 1295.56            | 2.294                          | 735.15             | 1686.43            |
| A_68_P23316767 | chr4:132833610-132833654                          | NM_025667:73           | Tmem222       | INSIDE                 | 1.443                                                        | 3.044                          | 915.15             | 2786.12            | 4.394                          | 784.52             | 3447.25            |
| A_68_P29613713 | chr14:55305483-55305527                           | NM_001085473:264       | Acin1         | INSIDE                 | 1.442                                                        | 1.827                          | 1544.88            | 2822.00            | 2.633                          | 1173.53            | 3090.32            |
| A_68_P23364702 | chr4:141102564-141102608                          | NR_030695:510          | B330016D10Rik | INSIDE                 | 1.442                                                        | 4.796                          | 2115.56            | 10146.69           | 6.917                          | 1843.49            | 12751.85           |
| A_68_P29055347 | chr13:55589235-55589279                           | NM_001177371:181       | Dbn1          | INSIDE                 | 1.442                                                        | 2.776                          | 1106.39            | 3070.84            | 4.004                          | 931.15             | 3727.99            |
| A_68_P30373737 | chr15:80502053-80502097                           | NM_145986:-202         | Fam83f        | PROMOTER               | 1.442                                                        | 1.675                          | 1637.22            | 2741.83            | 2.416                          | 1702.71            | 4112.99            |
| A_68_P24449105 | chr6:52161725-52161769                            | NM_010454:-3123        | Hoxa6         | PROMOTER               | 1.442                                                        | 2.003                          | 491.99             | 985.61             | 2.889                          | 402.05             | 1161.53            |
| A_68_P30267538 | chr15:61819548-61819592                           | NM_001177352:2675      | Myc           | INSIDE                 | 1.442                                                        | 1.750                          | 2848.24            | 4984.12            | 2.523                          | 2256.37            | 5693.87            |
| A_68_P21069553 | chr2:24909996-24910040                            | NM_001039386:120       | Nelf          | INSIDE                 | 1.442                                                        | 7.550                          | 1426.68            | 10771.43           | 10.888                         | 1505.80            | 16395.05           |
| A_68_P27447374 | chr10:110602373-110602417                         | NM_001003717:537       | Osbpl8        | INSIDE                 | 1.442                                                        | 4.572                          | 430.88             | 1970.03            | 6.594                          | 395.39             | 2607.36            |
| A_68_P31958010 | chr19:11893171-11893215                           | NM_011502:191          | Stx3          | INSIDE                 | 1.442                                                        | 1.540                          | 927.43             | 1427.99            | 2.220                          | 880.02             | 1953.82            |
| A_68_P27468583 | chr10:114688211-114688255                         | NM_025706:317          | Tbc1d15       | INSIDE                 | 1.442                                                        | 2.122                          | 1279.35            | 2714.54            | 3.061                          | 1029.32            | 3150.38            |
| A_68_P25836146 | chr8:47556498-47556542                            | NM_007981:125          | Acs11         | INSIDE                 | 1.441                                                        | 1.816                          | 808.68             | 1468.43            | 2.617                          | 740.08             | 1936.95            |
| A_68_P28616635 | chr12:88784339-88784383                           | NM_001102565:429       | Alkbh1        | INSIDE                 | 1.441                                                        | 1.623                          | 2599.48            | 4219.74            | 2.339                          | 2111.19            | 4937.21            |
| A_68_P31624567 | chr18:36720291-36720335                           | NM_175375:56           | Ankhd1        | INSIDE                 | 1.441                                                        | 1.737                          | 2296.88            | 3989.94            | 2.503                          | 1915.71            | 4794.36            |
| A_68_P30387839 | chr15:83180363-83180407                           | NM_025445:293          | Arfgap3       | INSIDE                 | 1.441                                                        | 4.649                          | 671.96             | 3123.86            | 6.698                          | 666.26             | 4462.37            |
| A_68_P25313630 | chr7:97592416-97592460                            | NM_145151:1148         | Crebzf        | INSIDE                 | 1.441                                                        | 2.192                          | 1619.69            | 3550.02            | 3.158                          | 1301.54            | 4110.89            |
| A_68_P23236049 | chr4:117354422-117354470                          | NM_023178:384          | Dmap1         | INSIDE                 | 1.441                                                        | 2.227                          | 726.54             | 1618.20            | 3.210                          | 514.11             | 1650.34            |
| A_68_P27284764 | chr10:80139113-80139157                           | NM_021462:-4413        | Mknk2         | PROMOTER               | 1.441                                                        | 1.745                          | 511.83             | 893.20             | 2.515                          | 494.33             | 1243.01            |
| A_68_P31621836 | chr18:36228394-36228438                           | NM_001167891:128398    | Nrg2          | INSIDE                 | 1.441                                                        | 2.269                          | 1281.16            | 2907.25            | 3.271                          | 1086.22            | 3552.79            |
| A_68_P29228005 | chr13:93962476-93962520                           | NM_133905:-260         | Papd4         | PROMOTER               | 1.441                                                        | 2.111                          | 1789.75            | 3778.83            | 3.042                          | 1418.22            | 4314.68            |
| A_68_P26949006 | chr10:12810713-12810757                           | NM_009538:141          | Plagl1        | INSIDE                 | 1.441                                                        | 2.528                          | 588.30             | 1486.95            | 3.642                          | 627.94             | 2286.66            |
| A_68_P26803290 | chr9:106331991-106332035                          | NM_009082:143          | Rpl29         | INSIDE                 | 1.441                                                        | 1.653                          | 6921.88            | 11443.61           | 2.382                          | 5791.60            | 13793.26           |
| A_68_P26574137 | chr9:62997201-62997245                            | NM_001163758:-454      | Skor1         | PROMOTER               | 1.441                                                        | 4.119                          | 751.18             | 3093.92            | 5.935                          | 672.30             | 3989.81            |
| A_68_P28781890 | chr12:120087139-120087183                         | NM_177082:2359         | Sp8           | INSIDE                 | 1.441                                                        | 1.650                          | 936.66             | 1545.46            | 2.377                          | 825.74             | 1962.99            |
| A_68_P31943259 | chr19:8810305-8810349                             | NM_134139:-2           | Wdr74         | PROMOTER               | 1.441                                                        | 0.437                          | 1483.47            | 648.57             | 0.630                          | 1294.98            | 815.99             |
| A_68_P23319341 | chr4:133308432-133308476                          | NM_001080819:1072      | Arid1a        | INSIDE                 | 1.440                                                        | 2.202                          | 1146.43            | 2524.79            | 3.172                          | 1025.72            | 3253.28            |
| A_68_P29941247 | chr14:119254329-119254373                         | NM_001160099:181       | Cldn10        | INSIDE                 | 1.440                                                        | 1.864                          | 525.64             | 980.02             | 2.684                          | 425.00             | 1140.85            |
| A_68_P30115251 | chr15:31532021-31532065                           | NM_026546:172          | Fam173b       | INSIDE                 | 1.440                                                        | 2.103                          | 1173.93            | 2468.83            | 3.028                          | 1082.18            | 3276.64            |
| A_68_P25729953 | chr8:27086780-27086824                            | NM_029884:414          | Hgsnat        | INSIDE                 | 1.440                                                        | 2.990                          | 1651.60            | 4938.89            | 4.306                          | 1338.21            | 5762.28            |
| A_68_P21395111 | chr2:84712344-84712388                            | NM_199223:14483        | Rtn4rl2       | INSIDE                 | 1.440                                                        | 1.981                          | 897.15             | 1777.13            | 2.853                          | 846.01             | 2413.72            |
| A_68_P23457021 | chr5:5694320-5694364                              | NM_001103156:-265      | Steap2        | PROMOTER               | 1.440                                                        | 4.252                          | 2226.24            | 9466.77            | 6.124                          | 1932.28            | 11832.98           |
| A_68_P27644759 | chr11:23155418-23155462                           | NM_001035226:-600      | Xpo1          | PROMOTER               | 1.440                                                        | 1.675                          | 1183.87            | 1982.94            | 2.412                          | 966.57             | 2331.03            |
| A_68_P22833088 | chr4:34830058-34830102                            | NM_013889:117          | Zfp292        | INSIDE                 | 1.440                                                        | 2.508                          | 1761.58            | 4417.80            | 3.611                          | 1647.46            | 5948.42            |
| A_68_P27243858 | chr10:72562474-72562518                           | ENSMUST00000053544:295 |               | INSIDE                 | 1.440                                                        | 1.614                          | 867.98             | 1400.85            | 2.324                          | 758.66             | 1763.30            |

| ProbeName      | Target position of probe on CpG island microarray | TargetID           | GeneSymbol    | CpG island Description | Ratio of relative methylation (TiO <sub>2</sub> -NP/Vehicle) | Sham group                     |                    |                    | TiO <sub>2</sub> -H group      |                    |                    |
|----------------|---------------------------------------------------|--------------------|---------------|------------------------|--------------------------------------------------------------|--------------------------------|--------------------|--------------------|--------------------------------|--------------------|--------------------|
|                |                                                   |                    |               |                        |                                                              | Relative methylation (Cy5/Cy3) | Cy3 signal (Input) | Cy5 signal (MeDIP) | Relative methylation (Cy5/Cy3) | Cy3 signal (Input) | Cy5 signal (MeDIP) |
| A_68_P25724840 | chr8:26127185-26127229                            | NM_007404:188      | Adam9         | INSIDE                 | 1.439                                                        | 2.381                          | 3131.51            | 7455.70            | 3.426                          | 2457.23            | 8418.00            |
| A_68_P22276955 | chr4:19969272-19969316                            | NM_010281:96       | Ggh           | INSIDE                 | 1.439                                                        | 2.289                          | 616.67             | 1411.79            | 3.294                          | 582.19             | 1917.86            |
| A_68_P25285302 | chr7:91032885-91032929                            | NM_030705:-55      | Mesdc1        | DIVERGENT_PROMOTER     | 1.439                                                        | 1.504                          | 835.43             | 1256.80            | 2.165                          | 719.20             | 1556.90            |
| A_68_P22422571 | chr3:109945742-109945786                          | NM_001163348:626   | Ntng1         | INSIDE                 | 1.439                                                        | 1.492                          | 3545.15            | 5287.91            | 2.146                          | 2603.80            | 5588.93            |
| A_68_P24265237 | chr6:17015070-17015114                            | NM_207176:-56      | Tes           | PROMOTER               | 1.439                                                        | 2.753                          | 677.63             | 1865.41            | 3.961                          | 687.12             | 2721.79            |
| A_68_P27579285 | chr11:8564248-8564292                             | NM_001083587:268   | Tns3          | INSIDE                 | 1.439                                                        | 1.503                          | 2113.83            | 3176.44            | 2.163                          | 1622.08            | 3508.07            |
| A_68_P26696139 | chr9:85736432-85736476                            | NM_001164792:-4    | Tpbp          | PROMOTER               | 1.439                                                        | 2.250                          | 684.18             | 1539.46            | 3.239                          | 607.52             | 1967.46            |
| A_68_P25657380 | chr8:11758231-11758275                            | NM_001113518:-77   | Arhgef7       | PROMOTER               | 1.438                                                        | 1.934                          | 2355.29            | 4554.16            | 2.780                          | 1938.44            | 5388.59            |
| A_68_P28731670 | chr12:110291859-110291903                         | NM_001163175:14547 | Begain        | INSIDE                 | 1.438                                                        | 3.009                          | 881.12             | 2650.91            | 4.326                          | 738.81             | 3195.76            |
| A_68_P27996044 | chr11:87577886-87577930                           | NM_172449:3866     | Bzrap1        | INSIDE                 | 1.438                                                        | 10.339                         | 1173.75            | 12135.82           | 14.864                         | 930.53             | 13830.94           |
| A_68_P30362471 | chr15:78633225-78633269                           | NM_130859:226      | Card10        | INSIDE                 | 1.438                                                        | 2.720                          | 1537.93            | 4183.67            | 3.911                          | 1301.14            | 5088.44            |
| A_68_P21768600 | chr2:155782266-155782310                          | NM_001129999:-5    | Cep250        | PROMOTER               | 1.438                                                        | 4.307                          | 2156.21            | 9286.15            | 6.193                          | 1805.15            | 11179.84           |
| A_68_P22875167 | chr4:44085230-44085274                            | NM_001190414:293   | Gne           | INSIDE                 | 1.438                                                        | 2.876                          | 1746.94            | 5024.47            | 4.137                          | 1460.08            | 6040.57            |
| A_68_P31244142 | chr17:53707297-53707341                           | NM_020005:1023     | Kat2b         | INSIDE                 | 1.438                                                        | 3.857                          | 906.06             | 3494.38            | 5.547                          | 732.76             | 4064.54            |
| A_68_P30397620 | chr15:84754050-84754094                           | NM_016714:215      | Nup50         | INSIDE                 | 1.438                                                        | 4.257                          | 1234.08            | 5253.86            | 6.121                          | 1122.13            | 6868.99            |
| A_68_P22729893 | chr4:11413533-11413577                            | NM_001081183:450   | 1110037F02Rik | INSIDE                 | 1.437                                                        | 2.024                          | 921.23             | 1864.51            | 2.909                          | 803.47             | 2337.16            |
| A_68_P21635706 | chr2:131388108-131388153                          | NM_013460:-109     | Adra1d        | PROMOTER               | 1.437                                                        | 1.690                          | 2413.40            | 4079.07            | 2.429                          | 1981.92            | 4814.53            |
| A_68_P26229921 | chr8:124474582-124474626                          | NM_001110100:172   | Bamp          | INSIDE                 | 1.437                                                        | 5.586                          | 4178.75            | 23342.39           | 8.029                          | 3019.79            | 24245.52           |
| A_68_P33007794 | chr4_random:128835-128879                         | NM_001033326:19055 | Dhrsx         | INSIDE                 | 1.437                                                        | 6.540                          | 5179.04            | 33869.01           | 9.395                          | 3481.04            | 32704.98           |
| A_68_P24156001 | chr5:144076400-144076444                          | NM_172726:617      | E130309D02Rik | INSIDE                 | 1.437                                                        | 2.264                          | 1046.72            | 2369.42            | 3.253                          | 938.73             | 3053.43            |
| A_68_P26234163 | chr8:125075221-125075265                          | NM_001037298:-13   | Fam38a        | PROMOTER               | 1.437                                                        | 1.552                          | 1816.29            | 2818.83            | 2.230                          | 1572.86            | 3507.22            |
| A_68_P26348586 | chr9:21528050-21528094                            | NM_010700:35       | Ldlr          | INSIDE                 | 1.437                                                        | 2.629                          | 1020.50            | 2682.53            | 3.778                          | 774.37             | 2925.79            |
| A_68_P26640623 | chr9:74710266-74710310                            | NM_008262:561      | Onecut1       | INSIDE                 | 1.437                                                        | 4.179                          | 2079.83            | 8692.42            | 6.006                          | 1664.86            | 9999.74            |
| A_68_P32139052 | chr19:45619644-45619688                           | NM_020032:15367    | Poll          | DOWNSTREAM             | 1.437                                                        | 1.557                          | 1450.24            | 2258.63            | 2.238                          | 1110.43            | 2484.79            |
| A_68_P22373269 | chr3:100913808-100913852                          | NM_011197:259      | Ptgrfn        | INSIDE                 | 1.437                                                        | 4.539                          | 568.12             | 2578.63            | 6.521                          | 543.62             | 3544.99            |
| A_68_P23395558 | chr4:148000660-148000704                          | NM_001003898:423   | Tardbp        | INSIDE                 | 1.437                                                        | 1.704                          | 942.11             | 1605.42            | 2.448                          | 850.93             | 2083.30            |
| A_68_P28747159 | chr12:113205331-113205376                         | NM_027360:-165     | 2010107E04Rik | DIVERGENT_PROMOTER     | 1.436                                                        | 4.443                          | 430.49             | 1912.54            | 6.380                          | 361.95             | 2309.12            |
| A_68_P21040812 | chr2:18602535-18602579                            | NM_007552:3912     | Bmi1          | INSIDE                 | 1.436                                                        | 2.230                          | 864.18             | 1926.75            | 3.203                          | 773.72             | 2477.95            |
| A_68_P25782096 | chr8:36889804-36889848                            | NM_027998:-213     | Cldn23        | PROMOTER               | 1.436                                                        | 2.860                          | 7034.43            | 20115.50           | 4.106                          | 5042.34            | 20703.83           |
| A_68_P28291022 | chr12:25365866-25365910                           | NM_001004455:772   | Cys1          | INSIDE                 | 1.436                                                        | 6.877                          | 15387.49           | 105817.20          | 9.873                          | 10241.94           | 101120.00          |
| A_68_P28739206 | chr12:111839872-111839916                         | NM_030238:290      | Dyne1h1       | INSIDE                 | 1.436                                                        | 3.659                          | 1091.47            | 3993.69            | 5.255                          | 949.14             | 4987.40            |
| A_68_P29410660 | chr14:13177298-13177342                           | NM_080433:1059     | Fezf2         | INSIDE                 | 1.436                                                        | 1.419                          | 1519.40            | 2156.27            | 2.038                          | 1195.93            | 2437.42            |
| A_68_P31159077 | chr17:35516814-35516858                           | NM_001143689:275   | H2-Gs10       | INSIDE                 | 1.436                                                        | 2.060                          | 3376.15            | 6954.00            | 2.958                          | 2713.51            | 8025.89            |
| A_68_P26445380 | chr9:40609023-40609067                            | NM_031165:-311     | Hspa8         | PROMOTER               | 1.436                                                        | 3.428                          | 2047.53            | 7018.47            | 4.923                          | 1722.88            | 8481.76            |
| A_68_P29232482 | chr13:94827759-94827803                           | NM_172589:30       | Lhfp12        | INSIDE                 | 1.436                                                        | 1.601                          | 634.81             | 1016.46            | 2.300                          | 807.44             | 1856.79            |
| A_68_P31066197 | chr17:15673753-15673797                           | NM_008799:-9509    | Pdcd2         | PROMOTER               | 1.436                                                        | 1.850                          | 3237.13            | 5989.84            | 2.657                          | 2716.52            | 9989.84            |
| A_68_P31938929 | chr19:7343308-7343352                             | NM_054048:-923     | Rcor2         | PROMOTER               | 1.436                                                        | 1.360                          | 1602.52            | 2179.14            | 1.953                          | 1371.04            | 2678.03            |
| A_68_P20502873 | chr1:107252976-107253020                          | NM_001160368:289   | Rnf152        | INSIDE                 | 1.436                                                        | 2.959                          | 1833.21            | 5423.92            | 4.248                          | 1574.50            | 6688.09            |
| A_68_P23281727 | chr4:126412759-126412803                          | NM_198960:733      | Tcfap2e       | INSIDE                 | 1.436                                                        | 2.178                          | 5659.61            | 12327.52           | 3.128                          | 4685.75            | 14657.59           |
| A_68_P31092981 | chr17:23813793-23813837                           | NM_001161746:602   | Tnfrsf12a     | INSIDE                 | 1.436                                                        | 1.736                          | 3254.07            | 5648.40            | 2.492                          | 2768.70            | 6900.88            |
| A_68_P22889131 | chr4:46520297-46520341                            | NM_029077:28698    | Trim14        | INSIDE                 | 1.436                                                        | 2.670                          | 1020.35            | 2724.65            | 3.834                          | 923.57             | 3541.36            |
| A_68_P20936234 | chr1:192921983-192922027                          | NM_030060:-288     | Batf3         | PROMOTER               | 1.435                                                        | 29.784                         | 1166.38            | 34739.93           | 42.739                         | 825.04             | 35261.56           |
| A_68_P26014851 | chr8:85913804-85913848                            | NM_009904:37       | Clgn          | INSIDE                 | 1.435                                                        | 1.940                          | 638.89             | 1239.70            | 2.785                          | 561.10             | 1562.71            |
| A_68_P31259849 | chr17:57202154-57202198                           | NM_177638:477      | Crb3          | INSIDE                 | 1.435                                                        | 1.695                          | 586.85             | 994.42             | 2.432                          | 501.30             | 1219.36            |
| A_68_P25416987 | chr7:118226039-118226083                          | NM_001040131:484   | Eif4g2        | INSIDE                 | 1.435                                                        | 2.014                          | 1141.51            | 2299.16            | 2.890                          | 885.24             | 2558.19            |
| A_68_P31493065 | chr18:11054816-11054860                           | NM_010258:2331     | Gata6         | INSIDE                 | 1.435                                                        | 1.635                          | 861.87             | 1409.53            | 2.346                          | 825.43             | 1936.60            |
| A_68_P31708188 | chr18:52688501-52688545                           | NM_010728:840      | Lox           | INSIDE                 | 1.435                                                        | 1.560                          | 899.11             | 1402.22            | 2.239                          | 709.78             | 1588.99            |
| A_68_P24658383 | chr6:94649752-94649796                            | NM_008377:365      | Lrig1         | INSIDE                 | 1.435                                                        | 2.307                          | 331.57             | 764.80             | 3.311                          | 373.13             | 1235.34            |
| A_68_P24929770 | chr6:146591301-146591345                          | NM_025315:222      | Med21         | INSIDE                 | 1.435                                                        | 5.106                          | 823.78             | 4206.26            | 7.325                          | 733.79             | 5374.87            |
| A_68_P23231034 | chr4:116480288-116480332                          | NM_001159581:-28   | Mutyh         | DIVERGENT_PROMOTER     | 1.435                                                        | 2.306                          | 3347.25            | 7719.85            | 3.310                          | 2488.78            | 8238.76            |
| A_68_P29654920 | chr14:62950855-62950899                           | NM_026001:-65      | Rnaseh2b      | PROMOTER               | 1.435                                                        | 1.636                          | 1693.75            | 2770.46            | 2.348                          | 1418.53            | 3330.13            |



| ProbeName      | Target position of probe on CpG island microarray | TargetID           | GeneSymbol    | CpG island Description | Ratio of relative methylation (TiO <sub>2</sub> -NP/Vehicle) | Sham group                     |                    |                    | TiO <sub>2</sub> -H group      |                    |                    |
|----------------|---------------------------------------------------|--------------------|---------------|------------------------|--------------------------------------------------------------|--------------------------------|--------------------|--------------------|--------------------------------|--------------------|--------------------|
|                |                                                   |                    |               |                        |                                                              | Relative methylation (Cy5/Cy3) | Cy3 signal (Input) | Cy5 signal (MeDIP) | Relative methylation (Cy5/Cy3) | Cy3 signal (Input) | Cy5 signal (MeDIP) |
| A_68_P27936386 | chr11:77029527-77029571                           | NM_177710:378      | Ssh2          | PROMOTER               | 1.435                                                        | 4.453                          | 1711.54            | 7622.33            | 6.391                          | 1424.23            | 9102.77            |
| A_68_P30427170 | chr15:89672308-89672352                           | NM_018803:39       | Syt10         | PROMOTER               | 1.435                                                        | 1.861                          | 449.45             | 836.50             | 2.671                          | 474.25             | 1266.89            |
| A_68_P26845372 | chr9:114472029-114472073                          | NM_001042503:1437  | Trim71        | INSIDE                 | 1.435                                                        | 3.231                          | 613.56             | 1982.19            | 4.636                          | 571.03             | 2647.35            |
| A_68_P23349884 | chr4:138686603-138686647                          | NR_033745:328      | 2310028011Rik | INSIDE                 | 1.434                                                        | 3.733                          | 4615.82            | 17229.37           | 5.353                          | 3667.75            | 19633.56           |
| A_68_P28098903 | chr11:105850138-105850182                         | NM_009598:13639    | Ace           | INSIDE                 | 1.434                                                        | 7.534                          | 2074.55            | 15629.93           | 10.802                         | 1527.36            | 16498.62           |
| A_68_P30579184 | chr16:18348951-18348995                           | NM_033474:606      | Arvcf         | INSIDE                 | 1.434                                                        | 1.813                          | 2856.70            | 5178.21            | 2.600                          | 2245.36            | 5838.14            |
| A_68_P28836396 | chr13:14046811-14046855                           | NM_178640:108      | B3galnt2      | PROMOTER               | 1.434                                                        | 1.910                          | 1688.04            | 3223.64            | 2.739                          | 1365.70            | 3741.01            |
| A_68_P27172919 | chr10:59649414-59649458                           | NM_016803:32572    | Chst3         | INSIDE                 | 1.434                                                        | 2.741                          | 1198.84            | 3286.30            | 3.932                          | 959.44             | 3772.08            |
| A_68_P25542609 | chr7:140968445-140968489                          | NM_133941:20       | Dhx32         | INSIDE                 | 1.434                                                        | 2.159                          | 1087.44            | 2347.25            | 3.095                          | 979.77             | 3032.14            |
| A_68_P22722448 | chr4:9771474-9771518                              | NM_013526:22       | Gdf6          | PROMOTER               | 1.434                                                        | 1.944                          | 2644.16            | 5140.52            | 2.789                          | 2155.11            | 6009.59            |
| A_68_P22129907 | chr3:51287845-51287889                            | NM_016858:21       | Rab33b        | PROMOTER               | 1.434                                                        | 2.009                          | 1571.71            | 3158.03            | 2.881                          | 1413.96            | 4073.24            |
| A_68_P28774232 | chr12:118772473-118772517                         | NM_175930:17543    | Rapgef5       | INSIDE                 | 1.434                                                        | 2.482                          | 682.68             | 1694.31            | 3.559                          | 590.93             | 2102.97            |
| A_68_P27288599 | chr10:80748500-80748544                           | NM_013769:5490     | Tjp3          | INSIDE                 | 1.434                                                        | 2.239                          | 797.76             | 1786.15            | 3.210                          | 758.90             | 2436.44            |
| A_68_P30639250 | chr16:30008917-30008961                           | NR_033631:186      | 4632428C04Rik | INSIDE                 | 1.433                                                        | 1.966                          | 1133.92            | 2229.41            | 2.818                          | 1021.92            | 2879.83            |
| A_68_P29560848 | chr14:41827140-41827184                           | NM_027464:98       | 5730469M10Rik | PROMOTER               | 1.433                                                        | 2.133                          | 3828.39            | 8165.54            | 3.056                          | 2835.11            | 8664.27            |
| A_68_P31108899 | chr17:26338048-26338092                           | NM_008113:225      | Arhgdig       | INSIDE                 | 1.433                                                        | 3.283                          | 1886.82            | 6195.22            | 4.706                          | 1667.91            | 7848.59            |
| A_68_P24925470 | chr6:145811720-145811764                          | NM_024469:2118     | Bhlhe41       | INSIDE                 | 1.433                                                        | 6.170                          | 1965.15            | 12124.53           | 8.843                          | 1757.58            | 15541.76           |
| A_68_P31098015 | chr17:24687028-24687072                           | NM_013630:156      | Pkd1          | INSIDE                 | 1.433                                                        | 1.657                          | 615.84             | 1020.71            | 2.376                          | 534.61             | 1269.97            |
| A_68_P29570101 | chr14:45949780-45949824                           | NM_025959:304      | Psmc6         | INSIDE                 | 1.433                                                        | 1.411                          | 1408.37            | 1987.78            | 2.022                          | 1043.34            | 2109.70            |
| A_68_P24061314 | chr5:124895322-124895366                          | NM_030241:5406     | Setd8         | INSIDE                 | 1.433                                                        | 2.904                          | 696.58             | 2023.18            | 4.163                          | 582.53             | 2425.26            |
| A_68_P27985577 | chr11:85650442-85650486                           | NM_009324:4348     | Tbx2          | INSIDE                 | 1.433                                                        | 1.927                          | 2748.21            | 5296.65            | 2.763                          | 2035.37            | 5622.82            |
| A_68_P23339475 | chr4:136913438-136913482                          | NM_009861:192      | Cdc42         | INSIDE                 | 1.432                                                        | 6.373                          | 963.58             | 6140.62            | 9.125                          | 784.19             | 7155.96            |
| A_68_P30459322 | chr15:95484732-95484776                           | NM_207533:448      | Dbx2          | INSIDE                 | 1.432                                                        | 1.907                          | 1004.97            | 1916.43            | 2.731                          | 945.93             | 2583.68            |
| A_68_P23236052 | chr4:117354732-117354776                          | NM_023178:76       | Dmap1         | INSIDE                 | 1.432                                                        | 1.837                          | 2606.68            | 4788.42            | 2.630                          | 2143.06            | 5635.52            |
| A_68_P22881527 | chr4:45197858-45197902                            | NM_001081172:103   | Frmpd1        | INSIDE                 | 1.432                                                        | 1.645                          | 593.32             | 976.03             | 2.356                          | 603.73             | 1422.44            |
| A_68_P32022553 | chr19:24355018-24355062                           | NM_008044:36       | Fxn           | INSIDE                 | 1.432                                                        | 3.163                          | 980.13             | 3099.87            | 4.530                          | 902.11             | 4086.42            |
| A_68_P31985486 | chr19:17431193-17431237                           | NM_173442:57       | Gent1         | PROMOTER               | 1.432                                                        | 2.980                          | 4805.40            | 14321.45           | 4.267                          | 3835.65            | 16366.47           |
| A_68_P32454254 | chrX:68810106-68810150                            | NM_008253:961      | Hmgb3         | INSIDE                 | 1.432                                                        | 2.964                          | 561.61             | 1664.78            | 4.246                          | 395.17             | 1677.91            |
| A_68_P25730818 | chr8:27229559-27229603                            | NM_207659:116      | Hook3         | INSIDE                 | 1.432                                                        | 1.751                          | 589.68             | 1032.40            | 2.508                          | 525.81             | 1318.73            |
| A_68_P29469016 | chr14:24824250-24824294                           | NM_010610:845      | Kenma1        | PROMOTER               | 1.432                                                        | 2.251                          | 1908.32            | 4294.72            | 3.223                          | 1621.56            | 5226.01            |
| A_68_P27282833 | chr10:79844657-79844701                           | NM_198615:5718     | Mex3d         | INSIDE                 | 1.432                                                        | 1.680                          | 460.08             | 772.90             | 2.405                          | 345.08             | 830.04             |
| A_68_P32118288 | chr19:42055682-42055726                           | NM_028152:78       | Mms19         | DIVERGENT_PROMOTER     | 1.432                                                        | 1.902                          | 1328.02            | 2526.36            | 2.724                          | 1108.91            | 3020.85            |
| A_68_P26015449 | chr8:86090778-86090822                            | NM_025843:144      | Ndufb7        | INSIDE                 | 1.432                                                        | 1.721                          | 978.95             | 1684.31            | 2.463                          | 824.08             | 2030.04            |
| A_68_P24360134 | chr6:35127844-35127888                            | NM_027513:251      | Nup205        | INSIDE                 | 1.432                                                        | 2.248                          | 1180.52            | 2653.29            | 3.218                          | 985.48             | 3171.57            |
| A_68_P23320011 | chr4:133443491-133443535                          | NM_009097:202      | Rps6ka1       | INSIDE                 | 1.432                                                        | 2.188                          | 964.88             | 2111.38            | 3.133                          | 907.19             | 2842.10            |
| A_68_P31254020 | chr17:56263726-56263770                           | NM_013662:9527     | Sema6b        | INSIDE                 | 1.432                                                        | 4.319                          | 3412.90            | 14741.84           | 6.187                          | 2822.02            | 17459.94           |
| A_68_P26743637 | chr9:95650689-95650733                            | NM_011643:67       | Trpc1         | INSIDE                 | 1.432                                                        | 4.306                          | 1965.66            | 8463.87            | 6.165                          | 1585.33            | 9772.83            |
| A_68_P29958337 | chr14:122277966-122278010                         | NM_026861:161      | Ubac2         | INSIDE                 | 1.432                                                        | 2.751                          | 1292.75            | 3555.77            | 3.939                          | 1094.81            | 4312.57            |
| A_68_P27268624 | chr10:76978491-76978535                           | NM_133998:46       | 1810008A18Rik | INSIDE                 | 1.431                                                        | 0.469                          | 1440.40            | 675.72             | 0.671                          | 1259.75            | 845.41             |
| A_68_P30482000 | chr15:99556370-99556414                           | NM_183256:344      | 2310016M24Rik | INSIDE                 | 1.431                                                        | 1.868                          | 2886.15            | 5391.15            | 2.673                          | 2223.93            | 5944.40            |
| A_68_P25608860 | chr7:151924429-151924473                          | NM_178642:67       | Ano1          | PROMOTER               | 1.431                                                        | 2.740                          | 1442.97            | 3953.40            | 3.920                          | 1301.36            | 5100.80            |
| A_68_P28082435 | chr11:102808047-102808091                         | NM_011795:293      | C1ql1         | PROMOTER               | 1.431                                                        | 2.491                          | 1229.97            | 3064.36            | 3.565                          | 979.07             | 3490.33            |
| A_68_P32454734 | chrX:68917679-68917723                            | NM_010340:759      | Gpr50         | INSIDE                 | 1.431                                                        | 3.037                          | 1714.79            | 5208.11            | 4.346                          | 951.26             | 4133.82            |
| A_68_P31110190 | chr17:26568998-26569042                           | NM_001081656:17111 | Neur11b       | INSIDE                 | 1.431                                                        | 2.158                          | 1000.89            | 2160.10            | 3.089                          | 786.14             | 2428.58            |
| A_68_P24815137 | chr6:124364678-124364722                          | NM_008995:385      | Pex5          | INSIDE                 | 1.431                                                        | 2.394                          | 3352.00            | 8025.03            | 3.426                          | 2428.36            | 8319.20            |
| A_68_P23524108 | chr5:20561799-20561843                            | NM_011203:205      | Ptpn12        | PROMOTER               | 1.431                                                        | 2.471                          | 4084.29            | 10094.31           | 3.535                          | 3490.85            | 12341.85           |
| A_68_P29855888 | chr14:102007522-102007566                         | NM_001081278:864   | Tbc1d4        | INSIDE                 | 1.431                                                        | 1.773                          | 894.75             | 1586.73            | 2.537                          | 710.50             | 1802.46            |
| A_68_P30558456 | chr16:13672419-13672463                           | NM_025653:328      | 3110001I22Rik | INSIDE                 | 1.430                                                        | 1.971                          | 580.42             | 1144.12            | 2.818                          | 492.14             | 1386.89            |
| A_68_P24631552 | chr6:90259348-90259392                            | NM_027928:15809    | Chst13        | INSIDE                 | 1.430                                                        | 2.267                          | 383.03             | 868.53             | 3.243                          | 324.29             | 1051.80            |
| A_68_P29671620 | chr14:65716836-65716880                           | NM_018788:85       | Extl3         | INSIDE                 | 1.430                                                        | 2.093                          | 867.26             | 1815.24            | 2.993                          | 790.34             | 2365.67            |
| A_68_P26905361 | chr10:4540405-4540449                             | NM_025995:649      | Fbxo5         | PROMOTER               | 1.430                                                        | 1.765                          | 2432.62            | 4293.20            | 2.523                          | 1969.64            | 4970.35            |

| ProbeName      | Target position of probe on CpG island microarray | TargetID               | GeneSymbol    | CpG island Description | Ratio of relative methylation (TiO <sub>2</sub> -NP/Vehicle) | Sham group                     |                    |                    | TiO <sub>2</sub> -H group      |                    |                    |
|----------------|---------------------------------------------------|------------------------|---------------|------------------------|--------------------------------------------------------------|--------------------------------|--------------------|--------------------|--------------------------------|--------------------|--------------------|
|                |                                                   |                        |               |                        |                                                              | Relative methylation (Cy5/Cy3) | Cy3 signal (Input) | Cy5 signal (MeDIP) | Relative methylation (Cy5/Cy3) | Cy3 signal (Input) | Cy5 signal (MeDIP) |
| A_68_P29631505 | chr14:58694946-58694991                           | NM_013518:3446         | Fgf9          | INSIDE                 | 1.430                                                        | 1.519                          | 1530.88            | 2325.70            | 2.173                          | 1248.57            | 2712.79            |
| A_68_P26406147 | chr9:32348923-32348967                            | NM_008026:9            | Fli1          | INSIDE                 | 1.430                                                        | 10.643                         | 1659.07            | 17657.64           | 15.216                         | 1332.51            | 20275.29           |
| A_68_P31215016 | chr17:48061356-48061400                           | NM_001110824:203       | Foxp4         | INSIDE                 | 1.430                                                        | 2.065                          | 544.46             | 1124.39            | 2.952                          | 431.86             | 1274.98            |
| A_68_P28307233 | chr12:28023729-28023773                           | NM_009234:3833         | Sox11         | INSIDE                 | 1.430                                                        | 1.917                          | 1761.58            | 3377.42            | 2.741                          | 1572.18            | 4309.91            |
| A_68_P20878653 | chr1:182872689-182872733                          | NM_144794:62           | Tmem63a       | INSIDE                 | 1.430                                                        | 3.461                          | 1110.82            | 3844.24            | 4.949                          | 1171.34            | 5796.88            |
| A_68_P23296885 | chr4:129168578-129168622                          | NM_001085491:167       | 1700125D06Rik | INSIDE                 | 1.429                                                        | 3.440                          | 2205.27            | 7585.94            | 4.916                          | 1839.76            | 9044.09            |
| A_68_P28599343 | chr12:85958262-85958306                           | NM_008992:132          | Abcd4         | INSIDE                 | 1.429                                                        | 2.059                          | 496.59             | 1022.34            | 2.942                          | 438.31             | 1289.71            |
| A_68_P29080189 | chr13:59658365-59658409                           | NM_023328:294          | Agtpbp1       | INSIDE                 | 1.429                                                        | 2.420                          | 614.39             | 1486.84            | 3.458                          | 529.07             | 1829.46            |
| A_68_P32260333 | chrX:11664076-11664120                            | NM_029510:-6419        | Bcor          | PROMOTER               | 1.429                                                        | 1.463                          | 2105.42            | 3079.95            | 2.091                          | 1135.40            | 2373.82            |
| A_68_P31369865 | chr17:78599190-78599234                           | NM_015800:-375         | Crim1         | PROMOTER               | 1.429                                                        | 3.631                          | 2214.04            | 8039.99            | 5.188                          | 1981.30            | 10278.47           |
| A_68_P27212423 | chr10:66998199-66998243                           | NM_010118:-2396        | Egr2          | PROMOTER               | 1.429                                                        | 1.970                          | 2569.89            | 5061.85            | 2.814                          | 2176.70            | 6125.52            |
| A_68_P27561404 | chr11:4998804-4998848                             | NM_007968:254          | Ewsr1         | INSIDE                 | 1.429                                                        | 2.514                          | 1332.85            | 3351.21            | 3.594                          | 1126.92            | 4050.26            |
| A_68_P24038706 | chr5:120886174-120886218                          | NM_008499:4302         | Lhx5          | INSIDE                 | 1.429                                                        | 3.656                          | 1390.51            | 5084.34            | 5.225                          | 1145.84            | 5987.14            |
| A_68_P30370814 | chr15:80042595-80042639                           | NM_010795:38466        | Mgat3         | INSIDE                 | 1.429                                                        | 3.499                          | 1181.13            | 4133.12            | 5.000                          | 930.76             | 4653.43            |
| A_68_P31207194 | chr17:46624614-46624658                           | NM_001162864:-12       | Ttkb1         | DIVERGENT_PROMOTER     | 1.429                                                        | 4.060                          | 5421.37            | 22008.46           | 5.802                          | 4083.42            | 23694.01           |
| A_68_P26168806 | chr8:114060945-114060989                          | NM_001168623:-1276     | Znrf1         | PROMOTER               | 1.429                                                        | 1.938                          | 1653.27            | 3204.55            | 2.771                          | 1338.26            | 3707.84            |
| A_68_P20370563 | chr1:78214303-78214348                            |                        |               | Unknown                | 1.429                                                        | 1.638                          | 1002.23            | 1641.76            | 2.341                          | 768.30             | 1798.39            |
| A_68_P25465270 | chr7:126887848-126887892                          | ENSMUST0000004569:4431 |               | DOWNSTREAM             | 1.429                                                        | 2.309                          | 971.07             | 2241.91            | 3.300                          | 817.53             | 2697.78            |
| A_68_P21977359 | chr3:19795207-19795251                            | NR_027985:358          | 4632415L05Rik | INSIDE                 | 1.428                                                        | 1.482                          | 1056.60            | 1565.64            | 2.115                          | 866.83             | 1833.64            |
| A_68_P21745336 | chr2:151527951-151527995                          | NM_001160363:229       | 5430405G05Rik | INSIDE                 | 1.428                                                        | 9.637                          | 702.25             | 6767.77            | 13.762                         | 645.46             | 8882.48            |
| A_68_P23542075 | chr5:23980487-23980531                            | NM_139153:22514        | Agap3         | INSIDE                 | 1.428                                                        | 4.539                          | 342.01             | 1552.25            | 6.483                          | 350.72             | 2273.86            |
| A_68_P24615404 | chr6:87285370-87285414                            | NM_054041:377          | Antxr1        | INSIDE                 | 1.428                                                        | 3.198                          | 3444.45            | 11013.90           | 4.568                          | 2856.12            | 13045.70           |
| A_68_P26022317 | chr8:87381112-87381157                            | NM_025648:250          | Farsa         | INSIDE                 | 1.428                                                        | 1.769                          | 496.37             | 878.07             | 2.527                          | 424.29             | 1072.13            |
| A_68_P23582164 | chr5:32439192-32439236                            | NM_008037:370          | Fosl2         | INSIDE                 | 1.428                                                        | 2.722                          | 2139.46            | 5824.04            | 3.888                          | 2060.63            | 8011.77            |
| A_68_P24817421 | chr6:124811227-124811271                          | NM_013533:2687         | Gpr162        | INSIDE                 | 1.428                                                        | 3.167                          | 1147.31            | 3633.33            | 4.524                          | 916.44             | 4145.62            |
| A_68_P26992095 | chr10:21016178-21016222                           | NM_001145209:416       | Hbs11         | INSIDE                 | 1.428                                                        | 1.591                          | 2034.89            | 3237.98            | 2.272                          | 1469.59            | 3339.49            |
| A_68_P29154201 | chr13:76521736-76521780                           | NM_030174:-650         | Metp1         | PROMOTER               | 1.428                                                        | 1.812                          | 399.29             | 723.68             | 2.588                          | 329.09             | 851.68             |
| A_68_P30376706 | chr15:81020912-81020956                           | NM_001082536:253       | Mkl1          | INSIDE                 | 1.428                                                        | 1.494                          | 2829.65            | 4228.59            | 2.135                          | 2432.01            | 5191.43            |
| A_68_P26319360 | chr9:14589324-14589368                            | NM_018736:196          | Mre11a        | INSIDE                 | 1.428                                                        | 4.375                          | 4559.98            | 19951.51           | 6.246                          | 3897.17            | 24342.17           |
| A_68_P32565875 | chrX:99045611-99045655                            | NM_001163610:909       | Nhs2          | INSIDE                 | 1.428                                                        | 2.674                          | 1582.43            | 4230.92            | 3.819                          | 1220.26            | 4660.05            |
| A_68_P21904290 | chr2:180234531-180234575                          | NM_018766:-128         | Ntsr1         | PROMOTER               | 1.428                                                        | 3.278                          | 1431.59            | 4693.16            | 4.682                          | 1179.37            | 5522.04            |
| A_68_P22282897 | chr3:82859249-82859293                            | NM_016784:-189         | Plrg1         | DIVERGENT_PROMOTER     | 1.428                                                        | 1.983                          | 3661.91            | 7262.64            | 2.832                          | 2941.09            | 8329.96            |
| A_68_P21152642 | chr2:39046414-39046458                            | NM_178778:-186         | Scal          | PROMOTER               | 1.428                                                        | 3.775                          | 2173.82            | 8206.59            | 5.390                          | 1657.02            | 8931.67            |
| A_68_P25957635 | chr8:74108819-74108863                            | NM_011977:16015        | Sle27a1       | INSIDE                 | 1.428                                                        | 1.924                          | 591.76             | 1138.79            | 2.748                          | 566.17             | 1555.89            |
| A_68_P20218124 | chr1:50983912-50983956                            | NM_019790:-432         | Tmeff2        | PROMOTER               | 1.428                                                        | 1.552                          | 2887.89            | 4483.16            | 2.217                          | 2124.27            | 4710.17            |
| A_68_P32217690 | chr19:59244706-59244750                           | NM_009501:-209         | Vax1          | PROMOTER               | 1.428                                                        | 2.418                          | 3335.67            | 8065.71            | 3.453                          | 2981.87            | 10297.34           |
| A_68_P24594973 | chr6:83652821-83652865                            | NR_002873:8084         | Vax2os1       | INSIDE                 | 1.428                                                        | 2.156                          | 1206.72            | 2602.19            | 3.079                          | 1009.76            | 3108.97            |
| A_68_P30214226 | chr15:51871837-51871881                           | NM_175503:206          | Aard          | INSIDE                 | 1.427                                                        | 1.916                          | 304.81             | 584.06             | 2.733                          | 277.47             | 758.45             |
| A_68_P28743039 | chr12:112510049-112510093                         | NM_033603:749          | Amn           | INSIDE                 | 1.427                                                        | 1.669                          | 1149.82            | 1918.80            | 2.381                          | 1011.30            | 2408.18            |
| A_68_P32576282 | chrX:101395577-101395621                          | NM_001077354:858       | C77370        | INSIDE                 | 1.427                                                        | 3.457                          | 1964.90            | 6793.41            | 4.933                          | 1171.01            | 5776.06            |
| A_68_P25806164 | chr8:41596758-41596802                            | NM_011135:-122         | Cnot7         | DIVERGENT_PROMOTER     | 1.427                                                        | 2.515                          | 7808.35            | 19635.50           | 3.588                          | 5707.77            | 20481.14           |
| A_68_P32539668 | chrX:91881915-91881959                            | NM_008179:529          | Gsp2          | INSIDE                 | 1.427                                                        | 3.643                          | 222.73             | 811.43             | 5.200                          | 158.32             | 823.29             |
| A_68_P30345339 | chr15:75824110-75824154                           | NM_177922:-66          | Mapk15        | PROMOTER               | 1.427                                                        | 1.919                          | 786.89             | 1509.80            | 2.738                          | 701.70             | 1921.46            |
| A_68_P24981707 | chr7:17061268-17061312                            | NM_008718:839          | Npas1         | INSIDE                 | 1.427                                                        | 3.402                          | 567.40             | 1930.32            | 4.854                          | 516.92             | 2509.31            |
| A_68_P26521207 | chr9:53345172-53345216                            | NM_001081152:43        | Npat          | INSIDE                 | 1.427                                                        | 2.439                          | 1302.14            | 3175.88            | 3.481                          | 978.04             | 3404.83            |
| A_68_P32745696 | chrX:147955251-147955299                          | NM_177201:60           | Phf8          | INSIDE                 | 1.427                                                        | 2.556                          | 706.50             | 1805.96            | 3.647                          | 342.37             | 1248.75            |
| A_68_P31140484 | chr17:31702098-31702142                           | NM_016670:403          | Pknox1        | INSIDE                 | 1.427                                                        | 2.201                          | 875.94             | 1927.71            | 3.141                          | 748.66             | 2351.44            |
| A_68_P21132198 | chr2:35056008-35056052                            | NM_026697:610          | Rab14         | INSIDE                 | 1.427                                                        | 3.344                          | 1140.50            | 3814.24            | 4.723                          | 998.62             | 4766.42            |
| A_68_P32237966 | chrX:6895899-6895943                              | ENSMUST00000132126:376 |               | INSIDE                 | 1.427                                                        | 2.569                          | 326.36             | 838.34             | 3.665                          | 265.67             | 973.79             |
| A_68_P29092064 | chr13:63341467-63341511                           | NM_028079:225195       | 201011101Rik  | INSIDE                 | 1.426                                                        | 2.239                          | 3623.94            | 8114.95            | 3.193                          | 2653.34            | 8472.99            |
| A_68_P22862943 | chr4:41516655-41516699                            | NM_001159583:-116      | 2310028H24Rik | DIVERGENT_PROMOTER     | 1.426                                                        | 1.638                          | 902.59             | 1478.41            | 2.335                          | 741.87             | 1732.59            |

| ProbeName      | Target position of probe on CpG island microarray | TargetID               | GeneSymbol    | CpG island Description | Ratio of relative methylation (TiO <sub>2</sub> -NP/Vehicle) | Sham group                     |                    |                    | TiO <sub>2</sub> -H group      |                    |                    |
|----------------|---------------------------------------------------|------------------------|---------------|------------------------|--------------------------------------------------------------|--------------------------------|--------------------|--------------------|--------------------------------|--------------------|--------------------|
|                |                                                   |                        |               |                        |                                                              | Relative methylation (Cy5/Cy3) | Cy3 signal (Input) | Cy5 signal (MeDIP) | Relative methylation (Cy5/Cy3) | Cy3 signal (Input) | Cy5 signal (MeDIP) |
| A_68_P27835441 | chr11:59015919-59015963                           | NR_037964:-7           | 2610507101Rik | DIVERGENT_PROMOTER     | 1.426                                                        | 1.494                          | 5723.64            | 8553.26            | 2.131                          | 4391.28            | 9355.86            |
| A_68_P31154762 | chr17:34742611-34742655                           | NM_001163379:-173      | Agpat1        | DIVERGENT_PROMOTER     | 1.426                                                        | 1.883                          | 1330.03            | 2504.28            | 2.685                          | 1020.33            | 2739.42            |
| A_68_P27902137 | chr11:70501182-70501226                           | NM_001190376:403       | Camta2        | INSIDE                 | 1.426                                                        | 1.816                          | 1627.44            | 2955.45            | 2.590                          | 1387.32            | 3593.52            |
| A_68_P30483526 | chr15:99869552-99869596                           | NM_001159361:480       | Dip2b         | INSIDE                 | 1.426                                                        | 2.682                          | 882.59             | 2367.54            | 3.824                          | 733.53             | 2805.01            |
| A_68_P23203783 | chr4:109656467-109656511                          | NM_172296:5859         | Dmrta2        | DOWNSTREAM             | 1.426                                                        | 5.320                          | 1612.88            | 8579.90            | 7.583                          | 1244.48            | 9437.45            |
| A_68_P28915538 | chr13:30228234-30228278                           | NM_153546:-102         | Mboat1        | PROMOTER               | 1.426                                                        | 1.618                          | 656.21             | 1061.57            | 2.306                          | 544.40             | 1255.51            |
| A_68_P31257221 | chr17:56743113-56743157                           | NM_001163300:18730     | Safb          | INSIDE                 | 1.426                                                        | 1.822                          | 1742.72            | 3175.71            | 2.599                          | 1293.65            | 3362.09            |
| A_68_P26544601 | chr9:57788261-57788305                            | NM_011352:341          | Sema7a        | INSIDE                 | 1.426                                                        | 2.228                          | 1064.64            | 2371.54            | 3.176                          | 854.68             | 2714.05            |
| A_68_P28908962 | chr13:29043905-29043949                           | NM_009238:1625         | Sox4          | INSIDE                 | 1.426                                                        | 2.876                          | 1566.80            | 4505.62            | 4.102                          | 1228.16            | 5037.66            |
| A_68_P24912677 | chr6:143781866-143781912                          | NM_001113559:376190    | Sox5          | INSIDE                 | 1.426                                                        | 1.675                          | 487.02             | 815.64             | 2.388                          | 383.16             | 915.04             |
| A_68_P31253704 | chr17:56213984-56214028                           | NM_024432:406          | Ubxn6         | INSIDE                 | 1.426                                                        | 2.904                          | 13803.75           | 40089.43           | 4.142                          | 9650.79            | 39974.27           |
| A_68_P29247842 | chr13:97518179-97518223                           |                        |               | Unknown                | 1.426                                                        | 3.100                          | 3663.27            | 11355.10           | 4.420                          | 3179.69            | 14054.99           |
| A_68_P33005882 | A_68_P33005882                                    |                        |               | Unknown                | 1.426                                                        | 3.817                          | 528.30             | 2016.67            | 5.443                          | 431.27             | 2347.38            |
| A_68_P23288223 | chr4:127665242-127665286                          | ENSMUST00000144298:-23 |               | PROMOTER               | 1.426                                                        | 2.757                          | 870.54             | 2400.34            | 3.933                          | 774.97             | 3048.08            |
| A_68_P31053612 | chr17:12935271-12935317                           | NR_002853:1118         | Airm          | INSIDE                 | 1.425                                                        | 1.664                          | 1280.94            | 2130.98            | 2.371                          | 1005.54            | 2384.52            |
| A_68_P27855080 | chr11:62461500-62461544                           | NM_198861:503          | BC046404      | INSIDE                 | 1.425                                                        | 1.607                          | 2660.83            | 4276.27            | 2.290                          | 2054.16            | 4703.79            |
| A_68_P28865538 | chr13:20182700-20182744                           | NM_080288:347          | Elmo1         | INSIDE                 | 1.425                                                        | 3.480                          | 2282.78            | 7943.04            | 4.958                          | 1633.16            | 8097.72            |
| A_68_P28814402 | chr13:9093309-9093353                             | NM_172585:180          | Larp4b        | INSIDE                 | 1.425                                                        | 4.285                          | 719.83             | 3084.31            | 6.105                          | 641.17             | 3914.29            |
| A_68_P31934662 | chr19:6428439-6428483                             | NM_001205234:9723      | Nrxn2         | INSIDE                 | 1.425                                                        | 3.398                          | 357.26             | 1213.98            | 4.843                          | 285.18             | 1381.15            |
| A_68_P25610029 | chr7:152101203-152101247                          | NM_028184:126          | Oraov1        | INSIDE                 | 1.425                                                        | 1.363                          | 1473.54            | 2008.57            | 1.943                          | 1225.30            | 2380.48            |
| A_68_P31929908 | chr19:5654240-5654284                             | NM_001164480:9445      | Sipa1         | INSIDE                 | 1.425                                                        | 2.172                          | 973.46             | 2114.71            | 3.096                          | 854.47             | 2645.64            |
| A_68_P30544728 | chr16:10835113-10835157                           | NM_001162932:-17       | A630055G03Rik | PROMOTER               | 1.424                                                        | 4.746                          | 1288.36            | 6115.03            | 6.759                          | 1085.06            | 7334.04            |
| A_68_P21576975 | chr2:120556771-120556815                          | NM_026891:461          | Cdan1         | INSIDE                 | 1.424                                                        | 1.974                          | 465.11             | 918.33             | 2.811                          | 412.87             | 1160.65            |
| A_68_P29361890 | chr13:118009924-118009968                         | NM_010330:567          | Emb           | INSIDE                 | 1.424                                                        | 1.512                          | 1520.73            | 2299.62            | 2.153                          | 1205.35            | 2595.48            |
| A_68_P32383370 | chrX:49967260-49967304                            | NM_016697:-131         | Gpc3          | PROMOTER               | 1.424                                                        | 3.095                          | 9985.31            | 30905.65           | 4.408                          | 4300.38            | 18956.13           |
| A_68_P26220850 | chr8:123061186-123061230                          | NM_001145896:-100      | Gse1          | PROMOTER               | 1.424                                                        | 2.484                          | 842.06             | 2092.04            | 3.537                          | 662.22             | 2342.54            |
| A_68_P25264894 | chr7:87260253-87260297                            | NM_173011:-38          | Ihd2          | PROMOTER               | 1.424                                                        | 3.376                          | 660.39             | 2229.50            | 4.806                          | 570.14             | 2740.19            |
| A_68_P31863637 | chr18:80519734-80519778                           | NM_001190373:41237     | Keng2         | INSIDE                 | 1.424                                                        | 4.185                          | 4794.85            | 20068.50           | 5.960                          | 3894.16            | 23210.21           |
| A_68_P23837519 | chr5:81449181-81449225                            | NM_198702:-1415        | Lphn3         | PROMOTER               | 1.424                                                        | 3.380                          | 834.56             | 2820.42            | 4.813                          | 670.50             | 3227.44            |
| A_68_P20937430 | chr1:193141794-193141838                          | NM_025424:181          | Nenf          | INSIDE                 | 1.424                                                        | 3.519                          | 756.69             | 2663.14            | 5.011                          | 634.83             | 3181.09            |
| A_68_P23637083 | chr5:42099031-42099075                            | NM_027295:342          | Rab28         | INSIDE                 | 1.424                                                        | 2.210                          | 737.77             | 1630.38            | 3.146                          | 643.81             | 2025.58            |
| A_68_P31836528 | chr18:75526822-75526866                           | NM_001042660:-174      | Smad7         | PROMOTER               | 1.424                                                        | 2.291                          | 514.95             | 1179.88            | 3.263                          | 471.35             | 1538.00            |
| A_68_P27709784 | chr11:35793975-35794019                           | NM_170779:-405         | Wwc1          | PROMOTER               | 1.424                                                        | 2.341                          | 284.11             | 665.18             | 3.334                          | 258.24             | 861.07             |
| A_68_P21290382 | chr2:65962425-65962469                            | NM_015736:404          | Galnt3        | INSIDE                 | 1.423                                                        | 2.078                          | 874.59             | 1817.17            | 2.956                          | 765.48             | 2262.47            |
| A_68_P26587426 | chr9:65239326-65239370                            | NM_028974:111          | Kbtbd13       | INSIDE                 | 1.423                                                        | 1.711                          | 395.84             | 677.41             | 2.435                          | 347.04             | 845.19             |
| A_68_P21089694 | chr2:28061599-28061643                            | NM_001038612:412       | Olfm1         | INSIDE                 | 1.423                                                        | 2.364                          | 1458.26            | 3447.64            | 3.365                          | 1185.01            | 3987.49            |
| A_68_P20053923 | chr1:16095671-16095715                            | NM_133832:-270         | Rdh10         | DIVERGENT_PROMOTER     | 1.423                                                        | 2.090                          | 560.23             | 1170.67            | 2.974                          | 551.98             | 1641.71            |
| A_68_P30140493 | chr15:36722578-36722622                           | NM_011740:1693         | Ywhaz         | INSIDE                 | 1.423                                                        | 1.348                          | 2080.18            | 2803.46            | 1.918                          | 1581.01            | 3032.76            |
| A_68_P30245918 | chr15:57907631-57907675                           | NM_001042438:392       | Zhx1          | INSIDE                 | 1.423                                                        | 2.738                          | 938.73             | 2570.11            | 3.897                          | 833.40             | 3247.82            |
| A_68_P26074975 | chr8:96535903-96535947                            | NM_011787:616          | Amfr          | INSIDE                 | 1.422                                                        | 1.492                          | 1949.22            | 2908.74            | 2.123                          | 1624.85            | 3449.13            |
| A_68_P24046040 | chr5:122161910-122161954                          | NM_009125:315          | Atxn2         | INSIDE                 | 1.422                                                        | 2.027                          | 1749.81            | 3547.00            | 2.882                          | 1488.38            | 4290.02            |
| A_68_P32260262 | chrX:11655805-11655849                            | NM_029510:1853         | Bcor          | INSIDE                 | 1.422                                                        | 1.371                          | 1911.85            | 2621.27            | 1.949                          | 979.23             | 1908.57            |
| A_68_P25095390 | chr7:53088658-53088702                            | NM_008172:33371        | Grin2d        | INSIDE                 | 1.422                                                        | 3.563                          | 1262.40            | 4498.44            | 5.067                          | 1114.50            | 5646.78            |
| A_68_P29613087 | chr14:55194747-55194791                           | NM_010590:1730         | Jub           | INSIDE                 | 1.422                                                        | 2.416                          | 2460.45            | 5944.98            | 3.436                          | 1982.73            | 6812.18            |
| A_68_P28095285 | chr11:105153865-105153909                         | NM_008626:-73          | Mrc2          | PROMOTER               | 1.422                                                        | 4.225                          | 3447.09            | 14562.36           | 6.007                          | 2430.85            | 14601.31           |
| A_68_P25092625 | chr7:52613255-52613299                            | NM_029741:9113         | Ppfa3         | INSIDE                 | 1.422                                                        | 3.194                          | 663.98             | 2120.53            | 4.542                          | 530.13             | 2407.97            |
| A_68_P25500162 | chr7:133520602-133520646                          | NM_023712:824          | Spns1         | INSIDE                 | 1.422                                                        | 2.871                          | 572.14             | 1642.66            | 4.083                          | 501.94             | 2049.58            |
| A_68_P31187133 | chr17:43153476-43153520                           | NM_178589:-5           | Tnfrsf21      | PROMOTER               | 1.422                                                        | 1.782                          | 735.33             | 1310.66            | 2.534                          | 663.27             | 1680.81            |
| A_68_P27365515 | chr10:94978265-94978309                           | NM_080560:491          | Ube2n         | INSIDE                 | 1.422                                                        | 3.809                          | 830.13             | 3161.90            | 5.418                          | 722.87             | 3916.47            |
| A_68_P27186307 | chr10:61949576-61949620                           | NM_133672:-45          | Vps26a        | PROMOTER               | 1.422                                                        | 3.902                          | 1404.97            | 5482.65            | 5.548                          | 1070.91            | 5941.57            |
| A_68_P30345267 | chr15:75812246-75812290                           | NM_001163518:447       | 2410075B13Rik | INSIDE                 | 1.421                                                        | 1.377                          | 1690.90            | 2327.70            | 1.956                          | 1348.63            | 2637.73            |

| ProbeName      | Target position of probe on CpG island microarray | TargetID          | GeneSymbol | CpG island Description | Ratio of relative methylation (TiO <sub>2</sub> -NP/Vehicle) | Sham group                     |                    |                    | TiO <sub>2</sub> -H group      |                    |                    |
|----------------|---------------------------------------------------|-------------------|------------|------------------------|--------------------------------------------------------------|--------------------------------|--------------------|--------------------|--------------------------------|--------------------|--------------------|
|                |                                                   |                   |            |                        |                                                              | Relative methylation (Cy5/Cy3) | Cy3 signal (Input) | Cy5 signal (MeDIP) | Relative methylation (Cy5/Cy3) | Cy3 signal (Input) | Cy5 signal (MeDIP) |
| A_68_P26989977 | chr10:20672484-20672528                           | NM_026203:154     | Ahi1       | INSIDE                 | 1.421                                                        | 3.099                          | 796.25             | 2467.77            | 4.405                          | 848.36             | 3737.14            |
| A_68_P26841767 | chr9:113650601-113650645                          | NM_001114347:32   | Clasp2     | INSIDE                 | 1.421                                                        | 2.491                          | 1132.02            | 2820.18            | 3.541                          | 996.51             | 3528.69            |
| A_68_P23222201 | chr4:114574854-114574898                          | NM_008593:6627    | Foxd2      | DOWNSTREAM             | 1.421                                                        | 3.263                          | 625.49             | 2040.92            | 4.638                          | 580.94             | 2694.51            |
| A_68_P23812523 | chr5:76373731-76373775                            | NM_010612:701     | Kdr        | INSIDE                 | 1.421                                                        | 1.552                          | 911.79             | 1415.15            | 2.206                          | 757.69             | 1671.14            |
| A_68_P30378912 | chr15:81494223-81494269                           | NM_145993:-119    | L3mbt2     | PROMOTER               | 1.421                                                        | 1.964                          | 1468.91            | 2884.74            | 2.790                          | 1163.64            | 3247.14            |
| A_68_P24816267 | chr6:124612992-124613036                          | NM_145130:-107    | Lpcat3     | PROMOTER               | 1.421                                                        | 2.819                          | 6204.39            | 17491.88           | 4.007                          | 5172.70            | 20725.45           |
| A_68_P30382866 | chr15:82169438-82169482                           | NM_008669:-204    | Naga       | DIVERGENT_PROMOTER     | 1.421                                                        | 2.621                          | 903.69             | 2368.91            | 3.726                          | 716.73             | 2670.73            |
| A_68_P27551120 | chr11:3189836-3189880                             | NM_019574:-601    | Patz1      | PROMOTER               | 1.421                                                        | 2.600                          | 566.69             | 1473.37            | 3.694                          | 434.89             | 1606.33            |
| A_68_P30651715 | chr16:32277893-32277937                           | NM_027355:368     | Rnf168     | INSIDE                 | 1.421                                                        | 1.480                          | 1228.71            | 1819.02            | 2.104                          | 1036.11            | 2180.33            |
| A_68_P22392367 | chr3:104442522-104442566                          | NM_009196:-46     | Slc16a1    | PROMOTER               | 1.421                                                        | 1.538                          | 3067.84            | 4719.16            | 2.186                          | 2499.13            | 5462.55            |
| A_68_P23607900 | chr5:36826413-36826457                            | NM_001170454:500  | Tada2b     | INSIDE                 | 1.421                                                        | 2.162                          | 4646.76            | 10045.98           | 3.073                          | 3440.19            | 10570.87           |
| A_68_P26542618 | chr9:57437330-57437374                            | NM_027895:94      | Ulk3       | INSIDE                 | 1.421                                                        | 2.757                          | 987.59             | 2722.90            | 3.917                          | 924.14             | 3620.05            |
| A_68_P22953712 | chr4:58956665-58956709                            | NM_001099323:187  | Zkscan16   | INSIDE                 | 1.421                                                        | 2.680                          | 1467.68            | 3933.53            | 3.809                          | 1115.69            | 4249.89            |
| A_68_P29388382 | A_68_P29388382                                    |                   |            | Unknown                | 1.421                                                        | 5.787                          | 645.09             | 3733.38            | 8.222                          | 598.38             | 4919.56            |
| A_68_P26872167 | chr9:119311485-119311529                          | NM_007397:-112    | Acvr2b     | PROMOTER               | 1.420                                                        | 1.894                          | 306.96             | 581.52             | 2.690                          | 293.65             | 789.98             |
| A_68_P23990789 | chr5:112656382-112656426                          | NR_003718:1564    | Miat       | INSIDE                 | 1.420                                                        | 3.657                          | 3521.20            | 12877.97           | 5.195                          | 2718.77            | 14122.74           |
| A_68_P26144000 | chr8:109818386-109818430                          | NM_018823:1039    | Nfat5      | INSIDE                 | 1.420                                                        | 1.406                          | 989.41             | 1390.67            | 1.995                          | 906.75             | 1809.35            |
| A_68_P32071922 | chr19:32831644-32831688                           | NM_008960:-400    | Pten       | PROMOTER               | 1.420                                                        | 3.731                          | 1652.64            | 6166.00            | 5.299                          | 1164.64            | 6171.60            |
| A_68_P26038364 | chr8:90484174-90484218                            | NM_033327:-702    | Zfp423     | PROMOTER               | 1.420                                                        | 2.690                          | 1218.54            | 3278.46            | 3.821                          | 1085.88            | 4149.67            |
| A_68_P22888266 | chr4:46358077-46358121                            | NM_183298:1033    | Foxe1      | INSIDE                 | 1.419                                                        | 2.861                          | 1769.83            | 5064.28            | 4.061                          | 1543.70            | 6269.47            |
| A_68_P22885282 | chr4:45839676-45839720                            | NM_018741:1       | Igfbp11    | INSIDE                 | 1.419                                                        | 1.847                          | 961.74             | 1776.69            | 2.622                          | 899.33             | 2357.68            |
| A_68_P25842953 | chr8:48761063-48761107                            | NM_023503:-571    | Ing2       | PROMOTER               | 1.419                                                        | 1.707                          | 607.79             | 1037.38            | 2.422                          | 540.57             | 1309.40            |
| A_68_P26770182 | chr9:100446024-100446068                          | NM_010878:426     | Nek1       | INSIDE                 | 1.419                                                        | 1.911                          | 1209.36            | 2311.66            | 2.713                          | 970.35             | 2632.31            |
| A_68_P20282814 | chr1:62750008-62750052                            | NM_001077406:140  | Nrp2       | INSIDE                 | 1.419                                                        | 1.496                          | 2768.18            | 4140.50            | 2.123                          | 2068.88            | 4392.13            |
| A_68_P31962487 | chr19:12869271-12869315                           | NR_024093:1321    | U05342     | INSIDE                 | 1.419                                                        | 3.008                          | 2234.52            | 6720.66            | 4.267                          | 1880.57            | 8024.34            |
| A_68_P22833091 | chr4:34830379-34830423                            | NM_013889:-203    | Zfp292     | PROMOTER               | 1.419                                                        | 2.359                          | 1941.85            | 4580.08            | 3.346                          | 1615.31            | 5405.37            |
| A_68_P24602878 | chr6:85019144-85019188                            | NM_177077:341     | Exoc6b     | INSIDE                 | 1.418                                                        | 2.092                          | 1503.87            | 3146.46            | 2.967                          | 1052.23            | 3121.95            |
| A_68_P24591430 | chr6:83052100-83052144                            | NM_026744:-6979   | Mrpl53     | PROMOTER               | 1.418                                                        | 2.520                          | 513.50             | 1294.26            | 3.575                          | 510.65             | 1825.60            |
| A_68_P26949004 | chr10:12810446-12810490                           | NM_009538:-125    | Plagl1     | PROMOTER               | 1.418                                                        | 2.735                          | 620.49             | 1697.16            | 3.880                          | 532.72             | 2066.77            |
| A_68_P28567253 | chr12:80130122-80130166                           | NM_181073:-5      | Plekhh1    | PROMOTER               | 1.418                                                        | 3.469                          | 750.42             | 2603.38            | 4.918                          | 614.61             | 3022.44            |
| A_68_P23441284 | chr4:155265872-155265916                          | NM_001033490:-23  | Pus1f      | DIVERGENT_PROMOTER     | 1.418                                                        | 2.215                          | 1826.83            | 4047.07            | 3.142                          | 1459.89            | 4586.74            |
| A_68_P30348873 | chr15:76350063-76350107                           | NM_130893:2475    | Sert1      | INSIDE                 | 1.418                                                        | 2.237                          | 2107.41            | 4714.76            | 3.172                          | 1649.29            | 5230.77            |
| A_68_P27807186 | chr11:53705037-53705081                           | NM_011396:147     | Stc22a5    | INSIDE                 | 1.418                                                        | 1.943                          | 3064.09            | 5952.44            | 2.755                          | 2449.95            | 6749.51            |
| A_68_P26142730 | chr8:109555781-109555825                          | NM_126165:577     | Vps4a      | INSIDE                 | 1.418                                                        | 3.159                          | 742.40             | 2345.28            | 4.479                          | 589.76             | 2641.60            |
| A_68_P22715817 | chr4:8619031-8619075                              | NM_001081417:985  | Chd7       | INSIDE                 | 1.417                                                        | 1.514                          | 9548.50            | 14453.91           | 2.144                          | 6606.79            | 14167.87           |
| A_68_P27924600 | chr11:74983847-74983891                           | NM_010430:-111    | Hic1       | DIVERGENT_PROMOTER     | 1.417                                                        | 2.286                          | 1116.06            | 2550.97            | 3.238                          | 884.80             | 2865.09            |
| A_68_P20614486 | chr1:133141955-133141999                          | NM_018750:-221    | Rassf5     | PROMOTER               | 1.417                                                        | 2.281                          | 1232.45            | 2811.73            | 3.234                          | 1041.72            | 3368.61            |
| A_68_P27842503 | chr11:60166349-60166393                           | NM_001039092:37   | Tom1l2     | INSIDE                 | 1.417                                                        | 2.063                          | 4182.55            | 8628.75            | 2.923                          | 3261.48            | 9534.34            |
| A_68_P24162463 | chr5:145529030-145529074                          | NM_001081362:-608 | Trrap      | DIVERGENT_PROMOTER     | 1.417                                                        | 3.214                          | 3512.09            | 11288.62           | 4.556                          | 2712.99            | 12359.52           |
| A_68_P25663081 | chr8:12672535-12672579                            | NM_198031:-456    | Tube3p3    | PROMOTER               | 1.417                                                        | 3.452                          | 2330.06            | 8043.53            | 4.891                          | 1945.10            | 9514.34            |
| A_68_P32751543 | chrX:149442021-149442065                          | NM_001137547:1031 | Usp51      | INSIDE                 | 1.417                                                        | 3.561                          | 1928.35            | 6866.94            | 5.047                          | 1138.77            | 5746.86            |
| A_68_P24536898 | chr6:71494106-71494150                            | NM_025783:281     | Vps24      | INSIDE                 | 1.417                                                        | 2.320                          | 708.74             | 1644.28            | 3.287                          | 567.62             | 1865.79            |
| A_68_P26074978 | chr8:96536308-96536352                            | NM_011787:210     | Amfr       | INSIDE                 | 1.416                                                        | 3.311                          | 1388.52            | 4596.77            | 4.687                          | 1274.11            | 5971.61            |
| A_68_P24062297 | chr5:125079741-125079785                          | NM_011596:115     | Atp6v0a2   | INSIDE                 | 1.416                                                        | 1.559                          | 562.67             | 877.39             | 2.208                          | 554.78             | 1224.70            |
| A_68_P29287628 | chr13:104711178-104711222                         | NM_001005868:-606 | Erbp2ip    | PROMOTER               | 1.416                                                        | 1.835                          | 1257.68            | 2308.12            | 2.599                          | 1169.33            | 3039.51            |
| A_68_P25730817 | chr8:27229449-27229493                            | NM_207659:226     | Hook3      | INSIDE                 | 1.416                                                        | 2.553                          | 3049.89            | 7785.12            | 3.616                          | 2441.25            | 8826.48            |
| A_68_P32016043 | chr19:23210311-23210355                           | NM_010638:-5383   | Klf9       | PROMOTER               | 1.416                                                        | 4.067                          | 888.34             | 3613.11            | 5.759                          | 697.02             | 4013.92            |
| A_68_P26540423 | chr9:56978779-56978823                            | NM_028636:217     | Man2c1     | INSIDE                 | 1.416                                                        | 2.713                          | 653.92             | 1774.18            | 3.843                          | 629.24             | 2417.98            |
| A_68_P25953728 | chr8:73267438-73267482                            | NM_201607:19498   | Pde4c      | INSIDE                 | 1.416                                                        | 2.036                          | 858.33             | 1747.23            | 2.882                          | 833.15             | 2401.31            |
| A_68_P32575424 | chrX:101176475-101176519                          | NM_011276:127     | Rlim       | INSIDE                 | 1.416                                                        | 2.853                          | 8693.10            | 24805.08           | 4.042                          | 6236.87            | 25207.16           |
| A_68_P21704898 | chr2:143837238-143837282                          | NM_024281:-261    | Rrbp1      | PROMOTER               | 1.416                                                        | 2.615                          | 1426.50            | 3730.43            | 3.704                          | 1309.78            | 4851.46            |

| ProbeName      | Target position of probe on CpG island microarray | TargetID                 | GeneSymbol    | CpG island Description | Ratio of relative methylation (TiO <sub>2</sub> -NP/Vehicle) | Sham group                     |                    |                    | TiO <sub>2</sub> -H group      |                    |                    |
|----------------|---------------------------------------------------|--------------------------|---------------|------------------------|--------------------------------------------------------------|--------------------------------|--------------------|--------------------|--------------------------------|--------------------|--------------------|
|                |                                                   |                          |               |                        |                                                              | Relative methylation (Cy5/Cy3) | Cy3 signal (Input) | Cy5 signal (MeDIP) | Relative methylation (Cy5/Cy3) | Cy3 signal (Input) | Cy5 signal (MeDIP) |
| A_68_P27541473 | chr10:127896021-127896065                         | NM_001114096:-249        | Smarcc2       | PROMOTER               | 1.416                                                        | 1.550                          | 1630.99            | 2528.10            | 2.195                          | 1385.29            | 3040.92            |
| A_68_P27977899 | chr11:84327083-84327127                           | NM_019816:-101           | Aatf          | PROMOTER               | 1.415                                                        | 1.558                          | 523.54             | 815.46             | 2.204                          | 444.21             | 978.92             |
| A_68_P28610312 | chr12:87811484-87811528                           | NM_011934:48913          | Esrrb         | INSIDE                 | 1.415                                                        | 3.514                          | 1014.32            | 3564.09            | 4.972                          | 806.86             | 4011.80            |
| A_68_P29075362 | chr13:58909694-58909740                           | NM_001025074:523         | Ntrk2         | INSIDE                 | 1.415                                                        | 3.545                          | 1141.26            | 4045.28            | 5.014                          | 821.72             | 4120.05            |
| A_68_P22101761 | chr3:45183553-45183597                            | NM_011043:1255           | Pcdh10        | INSIDE                 | 1.415                                                        | 1.576                          | 2007.04            | 3163.72            | 2.230                          | 1703.03            | 3798.26            |
| A_68_P30728925 | chr16:45844534-45844578                           | NM_153412:-65            | Phldb2        | PROMOTER               | 1.415                                                        | 3.345                          | 1302.97            | 4359.06            | 4.735                          | 1194.07            | 5653.92            |
| A_68_P27540451 | chr10:127707541-127707585                         | NM_019963:-69            | Stat2         | PROMOTER               | 1.415                                                        | 1.729                          | 2245.50            | 3882.21            | 2.446                          | 1746.72            | 4272.53            |
| A_68_P28402112 | chr12:46175110-46175154                           | NM_144552:338            | Stxbp6        | INSIDE                 | 1.415                                                        | 1.850                          | 3113.93            | 5759.59            | 2.617                          | 2470.93            | 6466.73            |
| A_68_P21920096 | chr3:5219661-5219705                              | NM_030708:1129           | Zfx4          | INSIDE                 | 1.415                                                        | 3.152                          | 1282.92            | 4043.32            | 4.461                          | 1384.14            | 6174.88            |
| A_68_P20319169 | chr1:69423807-69423851                            |                          |               | Unknown                | 1.415                                                        | 2.964                          | 555.40             | 1646.05            | 4.193                          | 466.30             | 1955.39            |
| A_68_P23537869 | chr5:23181744-23181788                            | ENSMUST00000157734:-1567 |               | PROMOTER               | 1.415                                                        | 2.503                          | 1679.74            | 4204.56            | 3.542                          | 1537.53            | 5446.32            |
| A_68_P28530097 | chr12:73186365-73186409                           | NM_026038:-86            | 2810055F11Rik | DIVERGENT_PROMOTER     | 1.414                                                        | 1.866                          | 3408.96            | 6362.14            | 2.640                          | 2516.52            | 6642.89            |
| A_68_P22407403 | chr3:107398682-107398726                          | NM_007441:756            | Alx3          | INSIDE                 | 1.414                                                        | 2.074                          | 1436.96            | 2980.63            | 2.933                          | 1240.18            | 3637.72            |
| A_68_P30751463 | chr16:50432288-50432332                           | NM_027444:192            | Bbx           | INSIDE                 | 1.414                                                        | 1.904                          | 328.99             | 626.29             | 2.692                          | 303.84             | 817.80             |
| A_68_P22151284 | chr3:54859150-54859194                            | NM_007628:-195           | Cena1         | PROMOTER               | 1.414                                                        | 1.485                          | 1402.96            | 2083.08            | 2.099                          | 1405.54            | 2950.93            |
| A_68_P32287122 | chrX:19637760-19637804                            | NM_021715:1087           | Chst7         | INSIDE                 | 1.414                                                        | 2.815                          | 968.09             | 2725.52            | 3.980                          | 588.99             | 2344.32            |
| A_68_P21820018 | chr2:164658706-164658751                          | NM_001038492:356         | Ctsa          | INSIDE                 | 1.414                                                        | 2.708                          | 566.82             | 1534.69            | 3.830                          | 530.30             | 2030.87            |
| A_68_P28925097 | chr13:31898615-31898660                           | NM_008592:123            | Foxc1         | INSIDE                 | 1.414                                                        | 1.421                          | 1066.47            | 1515.41            | 2.009                          | 1209.38            | 2429.45            |
| A_68_P22954220 | chr4:59048156-59048200                            | NM_025277:151            | Gng10         | INSIDE                 | 1.414                                                        | 5.807                          | 989.26             | 5744.38            | 8.209                          | 856.33             | 7029.87            |
| A_68_P30684003 | chr16:38088656-38088700                           | NM_019827:-408           | Gsk3b         | PROMOTER               | 1.414                                                        | 1.435                          | 1193.56            | 1712.45            | 2.029                          | 1142.32            | 2318.16            |
| A_68_P27995150 | chr11:87430698-87430742                           | NM_001045527:55          | Hsf5          | INSIDE                 | 1.414                                                        | 3.298                          | 1976.62            | 6519.18            | 4.663                          | 1723.73            | 8036.94            |
| A_68_P25652455 | chr8:11009184-11009228                            | NM_001081212:-776        | Irs2          | PROMOTER               | 1.414                                                        | 2.138                          | 1613.53            | 3449.83            | 3.024                          | 1491.62            | 4510.74            |
| A_68_P23819023 | chr5:77380662-77380706                            | NM_172146:-81            | Ppat          | PROMOTER               | 1.414                                                        | 3.590                          | 3968.51            | 14247.09           | 5.075                          | 3214.29            | 16312.63           |
| A_68_P27921385 | chr11:74403747-74403791                           | NM_001015046:-108        | Rap1gap2      | PROMOTER               | 1.414                                                        | 1.794                          | 920.25             | 1650.72            | 2.537                          | 807.88             | 2049.41            |
| A_68_P20451965 | chr1:94807505-94807549                            | NM_181405:125            | Rnpep11       | INSIDE                 | 1.414                                                        | 3.410                          | 1465.86            | 4998.88            | 4.822                          | 1215.11            | 5859.83            |
| A_68_P26365992 | chr9:25060005-25060049                            | NM_001205367:-13         | Septin7       | PROMOTER               | 1.414                                                        | 2.049                          | 1041.49            | 2133.69            | 2.897                          | 923.47             | 2674.98            |
| A_68_P31850942 | chr18:78244032-78244076                           | NM_001101038:9953        | Siglec15      | INSIDE                 | 1.414                                                        | 3.049                          | 393.30             | 1199.14            | 4.310                          | 413.77             | 1783.29            |
| A_68_P23973160 | chr5:109058811-109058855                          | NM_001163531:4           | Tmem175       | INSIDE                 | 1.414                                                        | 3.467                          | 380.53             | 1319.33            | 4.901                          | 384.66             | 1885.27            |
| A_68_P25614227 | chr8:3496122-3496166                              | NM_080461:3007           | Zfp358        | INSIDE                 | 1.414                                                        | 2.617                          | 496.37             | 1298.83            | 3.699                          | 392.65             | 1452.42            |
| A_68_P20026600 | chr1:10222313-10222357                            | NM_001102430:417         | Arfgef1       | INSIDE                 | 1.413                                                        | 1.931                          | 1534.02            | 2961.89            | 2.728                          | 1158.33            | 3160.39            |
| A_68_P29977214 | chr15:3976915-3976959                             | NR_028266:470            | BC037032      | INSIDE                 | 1.413                                                        | 2.675                          | 1415.05            | 3784.72            | 3.780                          | 1172.61            | 4432.52            |
| A_68_P25420899 | chr7:118923736-118923780                          | NM_173739:-267           | Galnt4        | PROMOTER               | 1.413                                                        | 3.673                          | 2958.55            | 10865.71           | 5.190                          | 2430.84            | 12615.98           |
| A_68_P26135759 | chr8:108282466-108282510                          | NM_027469:19             | Gfod2         | INSIDE                 | 1.413                                                        | 1.523                          | 1541.04            | 2347.57            | 2.152                          | 1181.67            | 2543.51            |
| A_68_P21874393 | chr2:174110277-174110321                          | NM_019690:478            | Gnas          | INSIDE                 | 1.413                                                        | 2.154                          | 2046.31            | 4406.79            | 3.042                          | 1642.18            | 4995.92            |
| A_68_P25023656 | chr7:29594118-29594162                            | NM_177301:-1768          | Hnrnp1        | PROMOTER               | 1.413                                                        | 2.687                          | 1331.04            | 3576.01            | 3.795                          | 1074.61            | 4078.44            |
| A_68_P26809623 | chr9:107471781-107471825                          | NM_010489:309            | Hyal2         | INSIDE                 | 1.413                                                        | 4.236                          | 5054.64            | 21410.10           | 5.986                          | 3419.86            | 20470.32           |
| A_68_P30478822 | chr15:99055021-99055065                           | NM_010601:-364           | Kenh3         | PROMOTER               | 1.413                                                        | 3.462                          | 317.84             | 1100.28            | 4.891                          | 338.85             | 1657.16            |
| A_68_P21809534 | chr2:162769378-162769422                          | NM_001081338:200         | L3mbtl1       | INSIDE                 | 1.413                                                        | 3.093                          | 968.62             | 2996.17            | 4.372                          | 841.69             | 3679.62            |
| A_68_P24610520 | chr6:86475945-86475989                            | NM_011865:193            | Pebp1         | INSIDE                 | 1.413                                                        | 2.626                          | 1858.75            | 4881.48            | 3.710                          | 1609.11            | 5969.99            |
| A_68_P20442663 | chr1:93355837-93355883                            | NM_011066:45             | Per2          | INSIDE                 | 1.413                                                        | 3.657                          | 6446.43            | 23575.61           | 5.166                          | 5308.25            | 27421.77           |
| A_68_P25092684 | chr7:52622218-52622262                            | NM_029741:149            | Ppfa3         | INSIDE                 | 1.413                                                        | 1.409                          | 1337.34            | 1884.40            | 1.991                          | 1117.01            | 2223.57            |
| A_68_P23327089 | chr4:134731774-134731818                          | NM_019732:55237          | Rumx3         | INSIDE                 | 1.413                                                        | 2.139                          | 298.22             | 637.88             | 3.022                          | 218.63             | 660.62             |
| A_68_P23395562 | chr4:148001229-148001274                          | NM_001003898:-146        | Tardbp        | PROMOTER               | 1.413                                                        | 1.494                          | 1928.57            | 2881.24            | 2.110                          | 1656.26            | 3495.28            |
| A_68_P26023340 | chr8:87562055-87562099                            | NM_001122843:1010        | Tnpo2         | INSIDE                 | 1.413                                                        | 2.301                          | 2992.19            | 6884.41            | 3.251                          | 2164.18            | 7036.24            |
| A_68_P31118855 | chr17:27993453-27993497                           | NM_001080769:23          | Uhrf1bp1      | INSIDE                 | 1.413                                                        | 3.683                          | 777.08             | 2862.23            | 5.206                          | 680.20             | 3541.08            |
| A_68_P24951458 | chr7:4945401-4945445                              | NM_026741:2281           | Zfp579        | INSIDE                 | 1.413                                                        | 2.367                          | 3124.98            | 7396.80            | 3.345                          | 2462.47            | 8236.76            |
| A_68_P29021091 | chr13:48828074-48828118                           | BC167198:235103          |               | INSIDE                 | 1.413                                                        | 2.604                          | 1695.84            | 4416.64            | 3.681                          | 1315.86            | 4843.55            |
| A_68_P25890689 | chr8:59819744-59819788                            | ENSMUST00000132988:8852  |               | DOWNSTREAM             | 1.413                                                        | 2.087                          | 997.48             | 2081.66            | 2.948                          | 802.38             | 2365.63            |
| A_68_P32957256 | chr17:8476298-8476342                             | NM_018819:-357           | Brp441        | PROMOTER               | 1.412                                                        | 2.317                          | 559.09             | 1295.31            | 3.271                          | 543.39             | 1777.50            |
| A_68_P26019658 | chr8:86939377-86939421                            | NM_007578:136            | Caena1a       | INSIDE                 | 1.412                                                        | 3.848                          | 1672.03            | 6434.41            | 5.433                          | 1364.80            | 7414.42            |
| A_68_P30371906 | chr15:80203104-80203152                           | NM_001044308:85461       | Caena1i       | INSIDE                 | 1.412                                                        | 4.922                          | 136.27             | 670.65             | 6.947                          | 83.75              | 581.84             |

| ProbeName      | Target position of probe on CpG island microarray | TargetID            | GeneSymbol    | CpG island Description | Ratio of relative methylation (TiO <sub>2</sub> -NP/Vehicle) | Sham group                     |                    |                    | TiO <sub>2</sub> -H group      |                    |                    |
|----------------|---------------------------------------------------|---------------------|---------------|------------------------|--------------------------------------------------------------|--------------------------------|--------------------|--------------------|--------------------------------|--------------------|--------------------|
|                |                                                   |                     |               |                        |                                                              | Relative methylation (Cy5/Cy3) | Cy3 signal (Input) | Cy5 signal (MeDIP) | Relative methylation (Cy5/Cy3) | Cy3 signal (Input) | Cy5 signal (MeDIP) |
| A_68_P22728452 | chr4:11117767-11117811                            | NM_001037134:-712   | Cene2         | PROMOTER               | 1.412                                                        | 2.320                          | 339.08             | 786.68             | 3.277                          | 284.19             | 931.30             |
| A_68_P28313702 | chr12:29236975-29237019                           | NM_001177964:-3794  | Dcdc2c        | PROMOTER               | 1.412                                                        | 2.750                          | 1290.20            | 3548.29            | 3.884                          | 1046.53            | 4065.16            |
| A_68_P30569150 | chr16:16359116-16359160                           | NM_001025947:-15    | Dnm1l         | PROMOTER               | 1.412                                                        | 10.245                         | 353.34             | 3619.79            | 14.461                         | 335.43             | 4850.62            |
| A_68_P27284176 | chr10:80049548-80049592                           | NM_145421:3516      | Fam108a       | INSIDE                 | 1.412                                                        | 2.481                          | 1696.54            | 4208.31            | 3.504                          | 1437.16            | 5035.41            |
| A_68_P23787602 | chr5:72048882-72048926                            | NM_010251:643       | Gabra4        | INSIDE                 | 1.412                                                        | 1.663                          | 2656.01            | 4416.65            | 2.349                          | 1936.04            | 4547.33            |
| A_68_P24119633 | chr5:136611987-136612031                          | NM_027891:-64       | Lrwd1         | DIVERGENT_PROMOTER     | 1.412                                                        | 1.868                          | 4287.48            | 8007.90            | 2.637                          | 2922.79            | 7708.54            |
| A_68_P27882408 | chr11:67111986-67112033                           | NM_177369:21384     | Myh8          | INSIDE                 | 1.412                                                        | 2.711                          | 235.50             | 638.38             | 3.829                          | 202.89             | 776.82             |
| A_68_P21723786 | chr2:147191194-147191239                          | NM_008780:487       | Pax1          | INSIDE                 | 1.412                                                        | 11.427                         | 1168.71            | 13355.35           | 16.130                         | 889.81             | 14352.68           |
| A_68_P20874691 | chr1:182186344-182186388                          | NM_001128605:65     | Psen2         | INSIDE                 | 1.412                                                        | 2.020                          | 634.12             | 1280.71            | 2.852                          | 529.21             | 1509.22            |
| A_68_P27902925 | chr11:70658259-70658303                           | NM_019400:16        | Rabep1        | INSIDE                 | 1.412                                                        | 1.763                          | 1828.38            | 3224.09            | 2.489                          | 1509.22            | 3757.14            |
| A_68_P28707014 | chr12:106270570-106270614                         | NR_003145:-103      | Snhg10        | DIVERGENT_PROMOTER     | 1.412                                                        | 2.559                          | 751.25             | 1922.41            | 3.614                          | 723.34             | 2614.10            |
| A_68_P32958522 | chr17:8627015-8627059                             | NM_009309:-251      | T             | PROMOTER               | 1.412                                                        | 1.744                          | 1177.05            | 2052.94            | 2.463                          | 1001.67            | 2466.93            |
| A_68_P25952182 | chr8:73013396-73013440                            | NM_182991:-2161     | Tmem59l       | DIVERGENT_PROMOTER     | 1.412                                                        | 2.404                          | 1488.13            | 3577.32            | 3.394                          | 1368.06            | 4642.54            |
| A_68_P22861756 | chr4:41296379-41296423                            | NM_023305:372       | Ubap1         | INSIDE                 | 1.412                                                        | 1.899                          | 2409.65            | 4575.33            | 2.680                          | 1781.80            | 4775.54            |
| A_68_P22410425 | chr3:107889046-107889090                          | NM_028779:477       | Ampd2         | INSIDE                 | 1.411                                                        | 1.872                          | 3075.40            | 5756.63            | 2.641                          | 2414.79            | 6378.00            |
| A_68_P29695817 | chr14:69955362-69955406                           | NM_026174:177       | Entpd4        | INSIDE                 | 1.411                                                        | 1.639                          | 1867.34            | 3060.75            | 2.313                          | 1690.78            | 3910.85            |
| A_68_P30356791 | chr15:77786971-77787015                           | NM_001017983:160    | Foxred2       | INSIDE                 | 1.411                                                        | 2.358                          | 2890.26            | 6815.42            | 3.328                          | 2449.53            | 8152.29            |
| A_68_P23757987 | chr5:66155002-66155046                            | NM_001024917:265    | N4bp2         | INSIDE                 | 1.411                                                        | 2.078                          | 490.71             | 1019.55            | 2.932                          | 461.90             | 1354.40            |
| A_68_P23057168 | chr4:82150339-82150383                            | NM_001113209:852    | Nfib          | INSIDE                 | 1.411                                                        | 2.024                          | 1268.08            | 2566.46            | 2.856                          | 1209.56            | 3454.91            |
| A_68_P25021286 | chr7:29124000-29124044                            | NM_013676:-284      | Supt5h        | PROMOTER               | 1.411                                                        | 2.093                          | 1024.49            | 2144.66            | 2.953                          | 951.93             | 2811.44            |
| A_68_P21101048 | chr2:29904402-29904446                            | NM_001008498:-25    | Wdr34         | PROMOTER               | 1.411                                                        | 2.596                          | 1068.05            | 2772.33            | 3.662                          | 950.24             | 3480.16            |
| A_68_P31152233 | chr17:34258866-34258910                           | NM_010238:-196      | Brd2          | PROMOTER               | 1.410                                                        | 1.630                          | 877.15             | 1430.03            | 2.299                          | 840.32             | 1931.76            |
| A_68_P25083584 | chr7:50932175-50932219                            | NM_145582:4796      | Ctu1          | INSIDE                 | 1.410                                                        | 2.203                          | 489.91             | 1079.14            | 3.106                          | 410.59             | 1275.12            |
| A_68_P27281161 | chr10:79594591-79594635                           | NM_001195268:5520   | Dos           | INSIDE                 | 1.410                                                        | 2.666                          | 1813.03            | 4832.69            | 3.759                          | 1417.47            | 5328.88            |
| A_68_P30468154 | chr15:97077540-97077584                           | NM_172293:25        | Fam113b       | INSIDE                 | 1.410                                                        | 5.074                          | 999.43             | 5071.38            | 7.154                          | 834.90             | 5972.61            |
| A_68_P24817835 | chr6:124881155-124881199                          | NM_001170341:-229   | Mif2          | PROMOTER               | 1.410                                                        | 2.519                          | 3481.95            | 8770.99            | 3.552                          | 3025.57            | 10748.07           |
| A_68_P25261270 | chr7:86610733-86610777                            | NM_017462:405       | Polg          | INSIDE                 | 1.410                                                        | 1.887                          | 2237.30            | 4221.82            | 2.661                          | 1842.14            | 4901.97            |
| A_68_P30576627 | chr16:17928257-17928301                           | NM_153150:34        | Sle25a1       | INSIDE                 | 1.410                                                        | 1.496                          | 833.86             | 1247.16            | 2.109                          | 719.36             | 1517.25            |
| A_68_P25235399 | chr7:81699616-81699660                            | NM_001038643:28     | Sleo3a1       | INSIDE                 | 1.410                                                        | 5.257                          | 915.21             | 4811.55            | 7.415                          | 790.12             | 5858.61            |
| A_68_P30562963 | chr16:14705930-14705974                           | NM_011415:1         | Snai2         | INSIDE                 | 1.410                                                        | 1.377                          | 1658.17            | 2283.48            | 1.942                          | 1325.17            | 2573.25            |
| A_68_P30787362 | chr16:57606693-57606737                           | NM_025599:266       | 2610528E23Rik | INSIDE                 | 1.409                                                        | 1.377                          | 1366.06            | 1880.56            | 1.939                          | 1110.63            | 2153.52            |
| A_68_P30655032 | chr16:32877777-32877821                           | NM_001159349:-71    | Fytd1         | DIVERGENT_PROMOTER     | 1.409                                                        | 3.794                          | 690.93             | 2621.64            | 5.344                          | 673.85             | 3601.39            |
| A_68_P32401470 | chrX:54756780-54756824                            | NM_001033360:132    | Gpr101        | INSIDE                 | 1.409                                                        | 2.418                          | 865.27             | 2092.26            | 3.408                          | 449.92             | 1533.16            |
| A_68_P27182284 | chr10:61246043-61246087                           | NM_207000:548       | H2afy2        | INSIDE                 | 1.409                                                        | 3.237                          | 4096.24            | 13260.25           | 4.561                          | 3206.81            | 14626.86           |
| A_68_P25846169 | chr8:49314467-49314511                            | NM_001145937:445556 | Odz3          | INSIDE                 | 1.409                                                        | 3.159                          | 728.27             | 2300.32            | 4.451                          | 652.82             | 2906.04            |
| A_68_P20768946 | chr1:162837198-162837242                          | NM_001024952:679    | Rc3h1         | INSIDE                 | 1.409                                                        | 2.773                          | 621.82             | 1724.47            | 3.908                          | 536.69             | 2097.56            |
| A_68_P23294679 | chr4:128735519-128735563                          | NM_029219:26        | Rnf19b        | INSIDE                 | 1.409                                                        | 2.908                          | 1340.86            | 3899.06            | 4.098                          | 1187.25            | 4865.85            |
| A_68_P22392370 | chr3:104442843-104442887                          | NM_009196:274       | Sle16a1       | INSIDE                 | 1.409                                                        | 3.586                          | 1227.30            | 4400.60            | 5.052                          | 1130.60            | 5711.85            |
| A_68_P27365030 | chr10:94878524-94878568                           | NM_001168656:-428   | Socs2         | PROMOTER               | 1.409                                                        | 2.684                          | 970.86             | 2605.41            | 3.781                          | 842.34             | 3184.83            |
| A_68_P26685862 | chr9:83728264-83728308                            | NM_001110265:-9     | Tik           | PROMOTER               | 1.409                                                        | 1.703                          | 3577.40            | 6092.03            | 2.400                          | 2394.02            | 5745.88            |
| A_68_P20679676 | chr1:145549881-145549925                          | NM_145991:-88       | Cdc73         | PROMOTER               | 1.408                                                        | 1.476                          | 5325.64            | 7862.49            | 2.079                          | 4869.18            | 10121.53           |
| A_68_P20453266 | chr1:94997065-94997109                            | NM_001110315:1356   | Kif1a         | INSIDE                 | 1.408                                                        | 1.643                          | 3795.87            | 6235.33            | 2.313                          | 2801.91            | 6480.75            |
| A_68_P24479790 | chr6:57652980-57653024                            | NM_133737:554       | Lanel2        | INSIDE                 | 1.408                                                        | 2.430                          | 794.70             | 1931.28            | 3.421                          | 691.36             | 2364.89            |
| A_68_P22661976 | chr3:153991190-153991234                          | NM_010713:2312      | Lhx8          | INSIDE                 | 1.408                                                        | 1.540                          | 3483.43            | 5364.29            | 2.168                          | 2801.56            | 6074.45            |
| A_68_P22793481 | chr4:26274038-26274083                            | NM_172865:-261      | Manea         | PROMOTER               | 1.408                                                        | 2.675                          | 2801.31            | 7494.27            | 3.766                          | 2411.79            | 9082.95            |
| A_68_P27980118 | chr11:84694015-84694059                           | NM_001077636:-249   | Pigw          | PROMOTER               | 1.408                                                        | 1.569                          | 699.70             | 1097.73            | 2.209                          | 622.33             | 1374.67            |
| A_68_P32141866 | chr19:46131585-46131629                           | NM_001081214:578    | Ppre1         | INSIDE                 | 1.408                                                        | 1.563                          | 2301.83            | 3598.49            | 2.201                          | 1881.74            | 4142.35            |
| A_68_P32806534 | chrX:162917700-162917744                          | NM_019773:-77       | Rab9          | INSIDE                 | 1.408                                                        | 2.038                          | 766.79             | 1562.78            | 2.870                          | 390.07             | 1119.42            |
| A_68_P30250720 | chr15:58720614-58720658                           | NM_175226:-147      | Rnf139        | PROMOTER               | 1.408                                                        | 3.567                          | 2289.85            | 8166.88            | 5.021                          | 1927.49            | 9678.51            |
| A_68_P31244849 | chr17:53828675-53828719                           | NM_028232:-56       | Sgol1         | PROMOTER               | 1.408                                                        | 2.141                          | 1821.99            | 3901.06            | 3.014                          | 1701.11            | 5126.64            |
| A_68_P29240371 | chr13:96145165-96145209                           | NM_025630:103       | Aggf1         | INSIDE                 | 1.407                                                        | 2.350                          | 738.00             | 1733.96            | 3.305                          | 740.57             | 2447.36            |

| ProbeName      | Target position of probe on CpG island microarray | TargetID           | GeneSymbol | CpG island Description | Ratio of relative methylation (TiO <sub>2</sub> -NP/Vehicle) | Sham group                     |                    |                    | TiO <sub>2</sub> -H group      |                    |                    |
|----------------|---------------------------------------------------|--------------------|------------|------------------------|--------------------------------------------------------------|--------------------------------|--------------------|--------------------|--------------------------------|--------------------|--------------------|
|                |                                                   |                    |            |                        |                                                              | Relative methylation (Cy5/Cy3) | Cy3 signal (Input) | Cy5 signal (MeDIP) | Relative methylation (Cy5/Cy3) | Cy3 signal (Input) | Cy5 signal (MeDIP) |
| A_68_P25089705 | chr7:52109937-52109981                            | NM_026270:5362     | Akt1s1     | INSIDE                 | 1.407                                                        | 2.093                          | 1940.17            | 4060.15            | 2.944                          | 1664.79            | 4901.91            |
| A_68_P32536862 | chrX:91225843-91225889                            | NR_028320:11872    | AU015836   | DOWNSTREAM             | 1.407                                                        | 2.633                          | 433.55             | 1141.38            | 3.705                          | 250.43             | 927.87             |
| A_68_P24055184 | chr5:123794688-123794734                          | NM_029850:254      | Bcl7a      | INSIDE                 | 1.407                                                        | 0.431                          | 1429.58            | 615.62             | 0.606                          | 1174.64            | 711.76             |
| A_68_P21569151 | chr2:119163754-119163798                          | NM_019454:12257    | Dll4       | DOWNSTREAM             | 1.407                                                        | 2.068                          | 1210.07            | 2502.81            | 2.909                          | 1026.27            | 2985.64            |
| A_68_P25405199 | chr7:116094716-116094760                          | NM_025344:16810    | Eif3f      | DOWNSTREAM             | 1.407                                                        | 1.942                          | 363.10             | 704.98             | 2.731                          | 271.25             | 740.85             |
| A_68_P20227608 | chr1:52557632-52557676                            | NM_008667:-362     | Nab1       | PROMOTER               | 1.407                                                        | 1.821                          | 1276.26            | 2324.40            | 2.562                          | 1135.61            | 2909.38            |
| A_68_P21842488 | chr2:168427130-168427174                          | NM_001037178:3     | Nfate2     | INSIDE                 | 1.407                                                        | 3.598                          | 4227.71            | 15210.75           | 5.063                          | 3218.50            | 16294.33           |
| A_68_P23894271 | chr5:92863563-92863607                            | NM_183392:641      | Nup54      | INSIDE                 | 1.407                                                        | 2.401                          | 2087.01            | 5011.84            | 3.380                          | 1927.99            | 6516.10            |
| A_68_P31156112 | chr17:34987286-34987330                           | NM_001045863:-27   | Rdbp       | DIVERGENT_PROMOTER     | 1.407                                                        | 1.602                          | 936.61             | 1500.90            | 2.255                          | 907.16             | 2045.32            |
| A_68_P31156004 | chr17:34973557-34973601                           | NM_019442:270      | Stk19      | INSIDE                 | 1.407                                                        | 2.874                          | 3122.89            | 8976.41            | 4.043                          | 2434.15            | 9842.26            |
| A_68_P26035029 | chr8:89996288-89996332                            | NM_019626:181      | Cbln1      | INSIDE                 | 1.406                                                        | 3.564                          | 8407.66            | 29968.20           | 5.012                          | 6059.68            | 30368.11           |
| A_68_P24011284 | chr5:116181838-116181882                          | NM_001080808:-292  | Ccdc64     | PROMOTER               | 1.406                                                        | 1.875                          | 2306.58            | 4325.59            | 2.638                          | 1864.46            | 4917.56            |
| A_68_P31254440 | chr17:56323216-56323260                           | NM_080837:105      | D17Wsu104e | INSIDE                 | 1.406                                                        | 2.193                          | 1001.83            | 2197.02            | 3.083                          | 887.19             | 2735.36            |
| A_68_P27055772 | chr10:33927102-33927146                           | NM_172508:233      | Dse        | INSIDE                 | 1.406                                                        | 2.291                          | 1326.27            | 3038.19            | 3.220                          | 1109.05            | 3571.66            |
| A_68_P20637452 | chr1:137001893-137001941                          | NM_001033409:-63   | Lgr6       | PROMOTER               | 1.406                                                        | 6.787                          | 7856.61            | 53326.08           | 9.545                          | 5134.92            | 49011.52           |
| A_68_P31123145 | chr17:28712577-28712621                           | NM_026571:-65      | Lhfp15     | PROMOTER               | 1.406                                                        | 1.795                          | 762.16             | 1367.86            | 2.524                          | 659.41             | 1664.28            |
| A_68_P27635062 | chr11:20991838-20991882                           | NM_023324:534      | Peli1      | INSIDE                 | 1.406                                                        | 2.699                          | 1651.07            | 4455.42            | 3.794                          | 1394.60            | 5290.94            |
| A_68_P29054323 | chr13:55423060-55423104                           | NM_009000:259      | Rab24      | INSIDE                 | 1.406                                                        | 2.908                          | 1715.27            | 4988.57            | 4.090                          | 1431.38            | 5853.72            |
| A_68_P23254536 | chr4:120689836-120689880                          | NM_133716:-6       | Smap2      | PROMOTER               | 1.406                                                        | 2.137                          | 1799.58            | 3844.83            | 3.003                          | 1896.83            | 5696.91            |
| A_68_P29964718 | chr14:123382401-123382445                         | NM_028651:61       | Tmtc4      | INSIDE                 | 1.406                                                        | 0.451                          | 1631.66            | 736.13             | 0.634                          | 1548.36            | 981.86             |
| A_68_P30592417 | chr16:21423184-21423228                           | NM_001081366:16    | Vps8       | INSIDE                 | 1.406                                                        | 1.700                          | 651.68             | 1107.59            | 2.390                          | 586.24             | 1401.27            |
| A_68_P24793727 | chr6:119494261-119494305                          | NM_009525:83       | Wnt5b      | INSIDE                 | 1.406                                                        | 1.856                          | 635.81             | 1180.32            | 2.610                          | 534.46             | 1394.95            |
| A_68_P30931895 | chr16:85900243-85900287                           | NM_011782:1106     | Adams5     | INSIDE                 | 1.405                                                        | 1.414                          | 864.81             | 1223.15            | 1.988                          | 842.52             | 1674.73            |
| A_68_P25500905 | chr7:133646409-133646453                          | NM_183020:386      | Atxn2l     | INSIDE                 | 1.405                                                        | 3.122                          | 1715.00            | 5353.63            | 4.386                          | 1486.82            | 6521.92            |
| A_68_P31020949 | chr17:6079867-6079911                             | NM_181392:61       | Gtf2h5     | INSIDE                 | 1.405                                                        | 1.509                          | 1025.28            | 1547.57            | 2.120                          | 822.53             | 1744.03            |
| A_68_P28431899 | chr12:52930265-52930309                           | NM_144788:237      | Hectd1     | INSIDE                 | 1.405                                                        | 3.721                          | 395.03             | 1469.73            | 5.229                          | 349.96             | 1829.86            |
| A_68_P29117879 | chr13:69948975-69949019                           | NM_138596:237      | Med10      | INSIDE                 | 1.405                                                        | 2.470                          | 509.97             | 1259.71            | 3.470                          | 452.22             | 1569.13            |
| A_68_P23269531 | chr4:124337466-124337523                          | NM_011141:2606     | Pou3f1     | INSIDE                 | 1.405                                                        | 6.180                          | 201.62             | 1246.01            | 6.680                          | 203.38             | 1765.43            |
| A_68_P23238885 | chr4:117884835-117884879                          | NM_011213:79146    | Ptprf      | INSIDE                 | 1.405                                                        | 5.342                          | 1806.98            | 9653.34            | 7.506                          | 1584.46            | 11893.57           |
| A_68_P32750676 | chrX:149203868-149203912                          | NM_172441:114      | Shroom2    | INSIDE                 | 1.405                                                        | 2.139                          | 894.45             | 1913.59            | 3.007                          | 560.54             | 1685.34            |
| A_68_P24544425 | chr6:72908782-72908826                            | NM_001190327:-62   | Tmsb10     | PROMOTER               | 1.405                                                        | 2.237                          | 1467.27            | 3282.32            | 3.144                          | 1175.79            | 3696.58            |
| A_68_P21620795 | chr2:128512977-128513021                          | NM_008569:133      | Anapc1     | INSIDE                 | 1.404                                                        | 1.694                          | 1441.96            | 2443.33            | 2.379                          | 1286.45            | 3060.30            |
| A_68_P32745112 | chrX:147779006-147779050                          | NM_198105:263      | Fam120c    | INSIDE                 | 1.404                                                        | 2.058                          | 2046.86            | 4213.02            | 2.891                          | 1083.97            | 3133.24            |
| A_68_P21609427 | chr2:126500825-126500869                          | NM_010249:376      | Gabpb1     | INSIDE                 | 1.404                                                        | 5.171                          | 1070.08            | 5533.26            | 7.258                          | 919.71             | 6675.09            |
| A_68_P28577474 | chr12:81859527-81859571                           | NM_001008423:2154  | Gm1568     | INSIDE                 | 1.404                                                        | 3.088                          | 946.54             | 2923.19            | 4.336                          | 841.54             | 3648.63            |
| A_68_P23644447 | chr5:43625680-43625724                            | NR_028417:891      | Gm7854     | INSIDE                 | 1.404                                                        | 2.190                          | 1122.39            | 2457.65            | 3.074                          | 936.76             | 2879.42            |
| A_68_P32536211 | chrX:91077428-91077472                            | NM_145630:-16      | Pdk3       | PROMOTER               | 1.404                                                        | 1.589                          | 1225.88            | 1947.97            | 2.231                          | 635.73             | 1418.11            |
| A_68_P30575813 | chr16:17807076-17807120                           | NM_153790:9724     | Scarf2     | INSIDE                 | 1.404                                                        | 2.276                          | 4243.24            | 9657.92            | 3.195                          | 3306.28            | 10564.39           |
| A_68_P32259784 | chrX:11584144-11584188                            |                    | Unknown    |                        | 1.404                                                        | 1.722                          | 6852.99            | 11799.17           | 2.417                          | 3456.14            | 8353.28            |
| A_68_P26885056 | chr9:121619308-121619352                          | NM_026794:-176     | Deb1       | DIVERGENT_PROMOTER     | 1.403                                                        | 1.680                          | 998.84             | 1677.58            | 2.356                          | 783.40             | 1845.53            |
| A_68_P33007792 | chr4_random:128621-128665                         | NM_001033326:18841 | Dhrsx      | INSIDE                 | 1.403                                                        | 2.689                          | 4244.61            | 11413.45           | 3.771                          | 3341.64            | 12602.76           |
| A_68_P31936679 | chr19:6996326-6996370                             | NM_007953:-50      | Esrra      | PROMOTER               | 1.403                                                        | 2.076                          | 1004.40            | 2085.48            | 2.914                          | 812.87             | 2368.73            |
| A_68_P31601519 | chr18:32322742-32322786                           | NM_011946:22       | Map3k2     | INSIDE                 | 1.403                                                        | 1.491                          | 710.88             | 1060.03            | 2.092                          | 704.25             | 1472.97            |
| A_68_P24757359 | chr6:113027455-113027499                          | NM_028385:-156     | Setd5      | DIVERGENT_PROMOTER     | 1.403                                                        | 3.215                          | 2571.75            | 8268.07            | 4.512                          | 2248.85            | 10147.12           |
| A_68_P31142311 | chr17:31992646-31992690                           | NM_010831:69       | Sik1       | INSIDE                 | 1.403                                                        | 1.467                          | 2539.21            | 3723.82            | 2.057                          | 2085.33            | 4290.14            |
| A_68_P29421307 | chr14:15536004-15536048                           | NM_001033270:488   | Sle4a7     | INSIDE                 | 1.403                                                        | 3.711                          | 691.17             | 2564.99            | 5.208                          | 592.83             | 3087.32            |
| A_68_P25926490 | chr8:67471009-67471053                            | NM_001163747:-53   | Tmem192    | PROMOTER               | 1.403                                                        | 1.627                          | 811.49             | 1320.02            | 2.282                          | 731.54             | 1669.41            |
| A_68_P24136156 | chr5:14002020-140020264                           | NM_013702:391      | Uncx       | INSIDE                 | 1.403                                                        | 2.655                          | 1505.01            | 3996.43            | 3.726                          | 1276.00            | 4753.82            |
| A_68_P24639205 | chr6:91423217-91423261                            | NM_133928:179      | Chchd4     | INSIDE                 | 1.402                                                        | 1.712                          | 1123.21            | 1923.19            | 2.401                          | 875.72             | 2102.71            |
| A_68_P26166334 | chr8:113581188-113581232                          | NM_028274:972      | Exosc6     | INSIDE                 | 1.402                                                        | 2.006                          | 1168.33            | 2343.79            | 2.813                          | 996.51             | 2802.98            |
| A_68_P31948450 | chr19:10176095-10176139                           | NM_019699:-123     | Fads2      | PROMOTER               | 1.402                                                        | 1.380                          | 1397.41            | 1929.06            | 1.936                          | 1083.93            | 2098.42            |

| ProbeName      | Target position of probe on CpG island microarray | TargetID           | GeneSymbol    | CpG island Description | Ratio of relative methylation (TiO <sub>2</sub> -NP/Vehicle) | Sham group                     |                    |                    | TiO <sub>2</sub> -H group      |                    |                    |
|----------------|---------------------------------------------------|--------------------|---------------|------------------------|--------------------------------------------------------------|--------------------------------|--------------------|--------------------|--------------------------------|--------------------|--------------------|
|                |                                                   |                    |               |                        |                                                              | Relative methylation (Cy5/Cy3) | Cy3 signal (Input) | Cy5 signal (MeDIP) | Relative methylation (Cy5/Cy3) | Cy3 signal (Input) | Cy5 signal (MeDIP) |
| A_68_P27591951 | chr11:11585898-11585942                           | NM_001025597:-295  | Ikzf1         | PROMOTER               | 1.402                                                        | 2.070                          | 730.08             | 1511.22            | 2.901                          | 599.41             | 1739.11            |
| A_68_P22139473 | chr3:52845232-52845276                            | NM_175386:-214     | Lhfp          | PROMOTER               | 1.402                                                        | 3.719                          | 2004.22            | 7453.29            | 5.213                          | 1562.39            | 8145.14            |
| A_68_P23316583 | chr4:132806890-132806934                          | NM_016693:10180    | Map3k6        | INSIDE                 | 1.402                                                        | 1.507                          | 895.06             | 1348.55            | 2.112                          | 732.59             | 1547.47            |
| A_68_P25478239 | chr7:129432560-129432604                          | NM_008855:-56      | Prkcb         | PROMOTER               | 1.402                                                        | 2.667                          | 505.17             | 1347.19            | 3.738                          | 432.90             | 1618.16            |
| A_68_P20354815 | chr1:75543006-75543050                            | NM_009208:188      | Slc4a3        | INSIDE                 | 1.402                                                        | 1.770                          | 518.97             | 918.77             | 2.482                          | 430.74             | 1069.06            |
| A_68_P31469354 | chr18:5592137-5592181                             | NM_011546:270      | Zeb1          | INSIDE                 | 1.402                                                        | 2.753                          | 1966.58            | 5414.65            | 3.861                          | 1502.43            | 5801.01            |
| A_68_P28185535 | chr11:120459852-120459896                         | NM_001038230:29    | Anapc11       | INSIDE                 | 1.401                                                        | 1.827                          | 749.13             | 1368.39            | 2.559                          | 589.68             | 1509.19            |
| A_68_P25947954 | chr8:72315394-72315438                            | NM_133224:355      | Atp13a1       | INSIDE                 | 1.401                                                        | 5.952                          | 863.09             | 5137.52            | 8.341                          | 743.89             | 6204.59            |
| A_68_P31567774 | chr18:25911745-25911789                           | NM_001146292:718   | Celf4         | INSIDE                 | 1.401                                                        | 1.931                          | 353.29             | 682.11             | 2.706                          | 290.12             | 784.96             |
| A_68_P30181643 | chr15:44451360-44451404                           | NM_019480:196      | Ebag9         | INSIDE                 | 1.401                                                        | 1.552                          | 2230.43            | 3461.83            | 2.175                          | 1838.06            | 3996.93            |
| A_68_P26166328 | chr8:113580417-113580461                          | NM_028274:200      | Exoc6         | INSIDE                 | 1.401                                                        | 6.399                          | 499.21             | 3194.31            | 8.964                          | 463.31             | 4152.94            |
| A_68_P32139831 | chr19:45734262-45734306                           | NM_013907:399      | Fbxw4         | INSIDE                 | 1.401                                                        | 1.512                          | 587.99             | 889.29             | 2.119                          | 532.35             | 1127.87            |
| A_68_P23577610 | chr5:31597885-31597929                            | NM_022424:344      | Fndc4         | INSIDE                 | 1.401                                                        | 2.391                          | 2561.88            | 6124.91            | 3.349                          | 2078.32            | 6959.31            |
| A_68_P25101651 | chr7:54101747-54101791                            | NM_001136069:-683  | Ldha          | PROMOTER               | 1.401                                                        | 2.910                          | 447.71             | 1302.65            | 4.075                          | 390.23             | 1590.14            |
| A_68_P21706641 | chr2:144156468-144156512                          | NM_152947:608      | Ovol2         | INSIDE                 | 1.401                                                        | 6.539                          | 4320.91            | 28254.59           | 9.164                          | 3330.70            | 30522.49           |
| A_68_P30140494 | chr15:36722668-36722712                           | NM_011740:1603     | Ywhaz         | INSIDE                 | 1.401                                                        | 1.704                          | 2603.52            | 4437.13            | 2.388                          | 1951.87            | 4661.74            |
| A_68_P20349427 | chr1:74634546-74634590                            | NM_029888:34       | Zfp142        | INSIDE                 | 1.401                                                        | 1.664                          | 2069.36            | 3443.62            | 2.332                          | 1793.48            | 4182.06            |
| A_68_P31929033 | chr19:5490488-5490532                             | NM_007687:56       | Cfl1          | INSIDE                 | 1.400                                                        | 1.869                          | 798.40             | 1491.89            | 2.616                          | 769.74             | 2013.88            |
| A_68_P27533642 | chr10:126478457-126478501                         | NM_001205036:-28   | LOC100504608  | DIVERGENT_PROMOTER     | 1.400                                                        | 3.818                          | 2175.23            | 8304.52            | 5.343                          | 2058.67            | 11000.07           |
| A_68_P27788131 | chr11:50172882-50172926                           | NR_030529:-1523    | Mir804        | PROMOTER               | 1.400                                                        | 2.253                          | 2303.11            | 5189.26            | 3.155                          | 1863.17            | 5879.04            |
| A_68_P27215086 | chr10:67442552-67442596                           | NM_001081346:229   | Rtkn2         | INSIDE                 | 1.400                                                        | 2.426                          | 1259.75            | 3055.84            | 3.396                          | 1153.03            | 3916.15            |
| A_68_P22659975 | chr3:153636613-153636657                          | NM_001081263:235   | Slc44a5       | INSIDE                 | 1.400                                                        | 1.638                          | 1233.09            | 2019.54            | 2.293                          | 1001.03            | 2295.80            |
| A_68_P24833353 | chr6:127511414-127511458                          |                    |               | Unknown                | 1.400                                                        | 1.740                          | 1231.76            | 2142.93            | 2.436                          | 1108.95            | 2701.05            |
| A_68_P27756941 | chr11:44431946-44431990                           | NM_007897:333      | Ebf1          | INSIDE                 | 1.399                                                        | 1.745                          | 394.68             | 688.61             | 2.441                          | 362.89             | 885.87             |
| A_68_P20226307 | chr1:52289184-52289228                            | NM_001081081:870   | Gls           | INSIDE                 | 1.399                                                        | 2.484                          | 1200.72            | 2982.60            | 3.475                          | 1081.89            | 3759.12            |
| A_68_P30681056 | chr16:37539468-37539512                           | NM_028812:365      | Gtf2e1        | INSIDE                 | 1.399                                                        | 2.322                          | 1872.10            | 4347.39            | 3.250                          | 1573.84            | 5114.56            |
| A_68_P23611441 | chr5:37482522-37482566                            | NM_178394:40449    | Jakmip1       | INSIDE                 | 1.399                                                        | 2.144                          | 743.36             | 1593.77            | 2.998                          | 643.30             | 1928.90            |
| A_68_P25263205 | chr7:86937995-86938039                            | NM_008588:460      | Mesp1         | INSIDE                 | 1.399                                                        | 3.289                          | 629.69             | 2070.96            | 4.600                          | 556.40             | 2559.24            |
| A_68_P24591487 | chr6:83059326-83059370                            | NM_026744:247      | Mrpl53        | INSIDE                 | 1.399                                                        | 1.585                          | 820.52             | 1300.18            | 2.217                          | 677.96             | 1503.31            |
| A_68_P30480281 | chr15:99287653-99287697                           | NM_001001884:505   | Neckap51      | INSIDE                 | 1.399                                                        | 1.686                          | 2209.21            | 3724.04            | 2.358                          | 1458.67            | 3438.90            |
| A_68_P27279098 | chr10:79281731-79281775                           | NM_001161747:25436 | Palm          | INSIDE                 | 1.399                                                        | 3.382                          | 602.57             | 2037.78            | 4.733                          | 558.73             | 2644.35            |
| A_68_P31208520 | chr17:46848930-46848974                           | NM_145488:541      | Pex6          | INSIDE                 | 1.399                                                        | 2.065                          | 1808.51            | 3735.42            | 2.890                          | 1669.19            | 4823.98            |
| A_68_P27942686 | chr11:78142057-78142101                           | NM_201406:155      | Pigs          | INSIDE                 | 1.399                                                        | 2.322                          | 3187.24            | 7400.05            | 3.248                          | 2820.21            | 9160.18            |
| A_68_P20011682 | chr1:6204945-6204989                              | NM_009826:224      | Rblcc1        | INSIDE                 | 1.399                                                        | 6.011                          | 107.23             | 644.54             | 8.411                          | 99.08              | 833.42             |
| A_68_P27926518 | chr11:75324220-75324264                           | NM_001029938:647   | Rilp          | INSIDE                 | 1.399                                                        | 4.585                          | 3632.75            | 16656.98           | 6.417                          | 2896.51            | 18586.14           |
| A_68_P23542975 | chr5:24107899-24107943                            | NM_025891:-100     | Smarcd3       | PROMOTER               | 1.399                                                        | 1.953                          | 382.91             | 747.98             | 2.732                          | 354.36             | 968.08             |
| A_68_P20409779 | chr1:87915105-87915149                            | NM_027029:-3390    | Spata3        | PROMOTER               | 1.399                                                        | 2.606                          | 369.43             | 962.76             | 3.645                          | 329.67             | 1201.68            |
| A_68_P29428732 | chr14:17198090-17198134                           | NM_009409:393      | Top2b         | INSIDE                 | 1.399                                                        | 3.732                          | 693.33             | 2587.49            | 5.223                          | 598.73             | 3127.03            |
| A_68_P27789375 | chr11:50415810-50415854                           | NM_175643:246      | Adams2        | INSIDE                 | 1.398                                                        | 2.253                          | 2651.57            | 5973.66            | 3.151                          | 2404.30            | 7575.02            |
| A_68_P25065437 | chr7:38892310-38892354                            | NM_007633:177      | Cene1         | INSIDE                 | 1.398                                                        | 1.867                          | 578.86             | 1080.99            | 2.611                          | 461.28             | 1204.19            |
| A_68_P27282061 | chr10:79727895-79727939                           | NM_001122604:181   | Dazap1        | INSIDE                 | 1.398                                                        | 3.911                          | 1487.01            | 5815.28            | 5.468                          | 1279.79            | 6997.54            |
| A_68_P23235083 | chr4:117223023-117223067                          | NM_080469:-54      | Eri3          | PROMOTER               | 1.398                                                        | 5.781                          | 754.89             | 4364.04            | 8.084                          | 638.76             | 5163.45            |
| A_68_P29953204 | chr14:121435005-121435049                         | NM_134082:231      | Farp1         | INSIDE                 | 1.398                                                        | 2.932                          | 995.92             | 2920.48            | 4.099                          | 921.82             | 3778.72            |
| A_68_P29529251 | chr14:35124024-35124068                           | NM_008133:134      | Glud1         | INSIDE                 | 1.398                                                        | 2.579                          | 2250.19            | 5802.24            | 3.605                          | 1990.22            | 7175.04            |
| A_68_P24757357 | chr6:113027235-113027279                          | NR_027010:-18      | Gt(ROSA)26Sor | DIVERGENT_PROMOTER     | 1.398                                                        | 2.086                          | 588.75             | 1228.17            | 2.915                          | 544.79             | 1588.32            |
| A_68_P24325223 | chr6:29162126-29162170                            | NM_011829:123      | Impdh1        | INSIDE                 | 1.398                                                        | 1.871                          | 5279.77            | 9878.35            | 2.615                          | 3665.18            | 9584.02            |
| A_68_P32148149 | chr19:47253623-47253667                           | NM_021360:335      | Neur11a       | INSIDE                 | 1.398                                                        | 2.625                          | 1198.87            | 3147.37            | 3.669                          | 959.99             | 3522.42            |
| A_68_P32565873 | chrX:99045311-99045356                            | NM_001163610:610   | Nhs12         | INSIDE                 | 1.398                                                        | 1.771                          | 1001.28            | 1772.96            | 2.475                          | 607.83             | 1504.35            |
| A_68_P29009460 | chr13:46822473-46822517                           | NM_175749:724      | Nup153        | INSIDE                 | 1.398                                                        | 1.677                          | 3751.32            | 6291.94            | 2.344                          | 2854.35            | 6691.14            |
| A_68_P31375202 | chr17:79452069-79452113                           | NM_027455:845      | Qpet          | INSIDE                 | 1.398                                                        | 2.331                          | 1879.36            | 4380.77            | 3.259                          | 1644.52            | 5359.97            |
| A_68_P23820630 | chr5:77694944-77694988                            | NM_011263:448      | Rest          | INSIDE                 | 1.398                                                        | 1.947                          | 5298.87            | 10319.06           | 2.723                          | 4359.51            | 11869.89           |



| ProbeName      | Target position of probe on CpG island microarray | TargetID           | GeneSymbol    | CpG island Description | Ratio of relative methylation (TiO <sub>2</sub> -NP/Vehicle) | Sham group                     |                    |                    | TiO <sub>2</sub> -H group      |                    |                    |
|----------------|---------------------------------------------------|--------------------|---------------|------------------------|--------------------------------------------------------------|--------------------------------|--------------------|--------------------|--------------------------------|--------------------|--------------------|
|                |                                                   |                    |               |                        |                                                              | Relative methylation (Cy5/Cy3) | Cy3 signal (Input) | Cy5 signal (MeDIP) | Relative methylation (Cy5/Cy3) | Cy3 signal (Input) | Cy5 signal (MeDIP) |
| A_68_P21365118 | chr2:78709482-78709526                            | NM_009454:301      | Ube2e3        | INSIDE                 | 1.398                                                        | 4.528                          | 1600.81            | 7247.78            | 6.330                          | 1381.60            | 8745.66            |
| A_68_P29448497 | chr14:21526842-21526886                           | NM_027996:91       | 2310021P13Rik | INSIDE                 | 1.397                                                        | 1.393                          | 2174.38            | 3028.32            | 1.946                          | 1834.85            | 3570.00            |
| A_68_P20769692 | chr1:162965131-162965175                          | NR_002840:-144     | Gas5          | DIVERGENT_PROMOTER     | 1.397                                                        | 3.524                          | 2582.17            | 9100.43            | 4.923                          | 1793.34            | 8827.97            |
| A_68_P30482737 | chr15:99705642-99705686                           | NM_001113545:223   | Lima1         | INSIDE                 | 1.397                                                        | 4.162                          | 1490.10            | 6202.30            | 5.814                          | 1170.51            | 6805.88            |
| A_68_P31236180 | chr17:51952405-51952449                           | NM_001163630:-1047 | Satb1         | PROMOTER               | 1.397                                                        | 2.008                          | 618.50             | 1242.07            | 2.805                          | 632.48             | 1774.17            |
| A_68_P24725198 | chr6:106719039-106719083                          | NM_027296:-105     | Trmt1         | PROMOTER               | 1.397                                                        | 5.081                          | 1506.70            | 7656.14            | 7.099                          | 1137.75            | 8077.29            |
| A_68_P32257886 | chrX:11241995-11242039                            |                    |               | Unknown                | 1.397                                                        | 3.581                          | 665.18             | 2381.66            | 5.004                          | 371.14             | 1857.01            |
| A_68_P28183960 | chr11:120209674-120209718                         | NM_009609:102      | Actg1         | INSIDE                 | 1.396                                                        | 1.642                          | 541.23             | 888.58             | 2.291                          | 499.59             | 1144.79            |
| A_68_P21492619 | chr2:104966561-104966605                          | NR_015462:85       | Al314831      | INSIDE                 | 1.396                                                        | 2.308                          | 940.63             | 2170.96            | 3.222                          | 704.81             | 2271.21            |
| A_68_P31053607 | chr17:12934828-12934873                           | NR_002853:674      | Aim           | INSIDE                 | 1.396                                                        | 2.003                          | 564.26             | 1130.13            | 2.796                          | 529.19             | 1479.46            |
| A_68_P24864229 | chr6:134869881-134869925                          | NM_009875:-516     | Cdkn1b        | PROMOTER               | 1.396                                                        | 1.394                          | 1252.13            | 1745.42            | 1.946                          | 1149.29            | 2237.07            |
| A_68_P22893294 | chr4:47221270-47221314                            | NM_009928:409      | Col15a1       | INSIDE                 | 1.396                                                        | 1.957                          | 7873.75            | 15410.43           | 2.733                          | 6249.31            | 17078.71           |
| A_68_P25422971 | chr7:119301817-119301861                          | NM_015814:733      | Dkk3          | INSIDE                 | 1.396                                                        | 6.658                          | 4315.43            | 28730.11           | 9.294                          | 2768.78            | 25732.05           |
| A_68_P29863770 | chr14:103498866-103498910                         | NM_015822:-162     | Fbxl3         | PROMOTER               | 1.396                                                        | 2.589                          | 973.82             | 2521.37            | 3.613                          | 902.17             | 3259.82            |
| A_68_P28480021 | chr12:62624233-62624277                           | NM_178714:-1364    | Lrfn5         | PROMOTER               | 1.396                                                        | 1.666                          | 443.87             | 739.42             | 2.325                          | 369.37             | 858.89             |
| A_68_P25091650 | chr7:52437190-52437234                            | NM_053256:848      | Ph2           | DOWNSTREAM             | 1.396                                                        | 1.506                          | 1846.75            | 2781.72            | 2.102                          | 1450.07            | 3048.37            |
| A_68_P27646885 | chr11:23565657-23565701                           | NM_001033654:5     | Pus10         | INSIDE                 | 1.396                                                        | 1.369                          | 1802.33            | 2467.43            | 1.911                          | 1579.50            | 3019.08            |
| A_68_P21077274 | chr2:26092670-26092714                            | NM_153559:248      | Qsox2         | INSIDE                 | 1.396                                                        | 1.944                          | 2133.27            | 4147.70            | 2.715                          | 1864.67            | 5062.62            |
| A_68_P25092432 | chr7:52582657-52582701                            | NM_175130:6472     | Trpm4         | INSIDE                 | 1.396                                                        | 2.555                          | 1622.52            | 4144.76            | 3.566                          | 1367.67            | 4876.75            |
| A_68_P24819389 | chr6:125165905-125165949                          | NM_001080557:328   | Vamp1         | INSIDE                 | 1.396                                                        | 1.869                          | 954.47             | 1783.85            | 2.609                          | 844.70             | 2204.17            |
| A_68_P27033518 | chr10:28868262-28868306                           | NM_026138:4483     | 6330407J23Rik | INSIDE                 | 1.395                                                        | 1.534                          | 2436.88            | 3737.10            | 2.139                          | 1828.86            | 3912.70            |
| A_68_P23192159 | chr4:107356053-107356097                          | NM_019872:693      | Dmrtb1        | INSIDE                 | 1.395                                                        | 1.903                          | 441.89             | 840.91             | 2.655                          | 421.38             | 1118.83            |
| A_68_P27067359 | chr10:36693905-36693949                           | NM_008229:-423     | Hdac2         | PROMOTER               | 1.395                                                        | 2.956                          | 2512.26            | 7426.68            | 4.123                          | 1989.08            | 8200.42            |
| A_68_P31731697 | chr18:56867382-56867426                           | NM_010721:-62      | Lmnb1         | PROMOTER               | 1.395                                                        | 2.458                          | 549.59             | 1350.75            | 3.428                          | 488.07             | 1673.23            |
| A_68_P22038555 | chr3:32428477-32428521                            | NM_024200:95       | Mfn1          | INSIDE                 | 1.395                                                        | 3.778                          | 1062.72            | 4015.10            | 5.272                          | 1025.16            | 5404.92            |
| A_68_P32183819 | chr19:53750945-53750989                           | NM_001170847:-829  | Rbm20         | PROMOTER               | 1.395                                                        | 1.383                          | 1942.31            | 2685.80            | 1.929                          | 1608.32            | 3102.19            |
| A_68_P31738737 | chr18:58039024-58039069                           | NM_009194:715      | Slc12a2       | INSIDE                 | 1.395                                                        | 1.668                          | 1207.21            | 2013.50            | 2.326                          | 1010.92            | 2351.78            |
| A_68_P32008153 | chr19:21852916-21852960                           | NM_001033759:107   | Tmem2         | INSIDE                 | 1.395                                                        | 3.709                          | 1218.89            | 4520.81            | 5.173                          | 1023.30            | 5294.04            |
| A_68_P23874561 | A_68_P23874561                                    |                    |               | Unknown                | 1.395                                                        | 7.260                          | 319.56             | 2320.13            | 10.131                         | 308.34             | 3123.78            |
| A_68_P26749715 | chr9:96789502-96789546                            | NM_153420:317      | Acp12         | INSIDE                 | 1.394                                                        | 1.692                          | 12101.53           | 20476.82           | 2.358                          | 7410.41            | 17477.14           |
| A_68_P23315382 | chr4:132595283-132595327                          | NM_146155:27884    | Ahd1          | INSIDE                 | 1.394                                                        | 3.767                          | 896.38             | 3377.11            | 5.252                          | 793.29             | 4166.12            |
| A_68_P21569149 | chr2:119163546-119163590                          | NM_019454:12049    | Dil4          | DOWNSTREAM             | 1.394                                                        | 4.287                          | 1272.36            | 5454.83            | 5.977                          | 1115.32            | 6666.14            |
| A_68_P22081217 | chr3:40549685-40549729                            | NM_011020:172      | Hspa41        | INSIDE                 | 1.394                                                        | 1.992                          | 1461.33            | 2911.48            | 2.777                          | 1265.58            | 3514.48            |
| A_68_P24759766 | chr6:113432543-113432587                          | NM_134159:11116    | Il17rc        | INSIDE                 | 1.394                                                        | 4.030                          | 2414.78            | 9732.27            | 5.617                          | 1971.48            | 11073.56           |
| A_68_P31791016 | chr18:67448771-67448815                           | NM_053261:-84      | Impa2         | PROMOTER               | 1.394                                                        | 5.242                          | 21630.25           | 113388.70          | 7.309                          | 13337.96           | 97486.45           |
| A_68_P25954564 | chr8:73386897-73386941                            | NM_032397:-6011    | Kenn1         | PROMOTER               | 1.394                                                        | 6.923                          | 863.31             | 5976.70            | 9.648                          | 731.30             | 7055.72            |
| A_68_P20080973 | chr1:21951507-21951551                            | NM_001160139:495   | Kenq5         | INSIDE                 | 1.394                                                        | 1.983                          | 1766.27            | 3502.03            | 2.764                          | 1556.32            | 4301.49            |
| A_68_P21203206 | chr2:49475493-49475538                            | NM_008449:682      | Kif5c         | INSIDE                 | 1.394                                                        | 2.658                          | 1117.53            | 2970.46            | 3.706                          | 947.98             | 3513.10            |
| A_68_P25954066 | chr8:73311865-73311909                            | NM_199308:4446     | Mast3         | INSIDE                 | 1.394                                                        | 1.885                          | 3213.06            | 6055.79            | 2.627                          | 2384.39            | 6264.26            |
| A_68_P24192244 | chr5:151476355-151476399                          | NM_175310:-25      | Pds5b         | DIVERGENT_PROMOTER     | 1.394                                                        | 1.880                          | 2011.69            | 3782.47            | 2.620                          | 1713.43            | 4490.00            |
| A_68_P25114628 | chr7:57034222-57034266                            | NM_133740:517      | Prmt3         | INSIDE                 | 1.394                                                        | 2.031                          | 1557.36            | 3163.39            | 2.832                          | 1345.01            | 3809.64            |
| A_68_P26165837 | chr8:113494378-113494429                          | NM_009179:50639    | St3gal2       | INSIDE                 | 1.394                                                        | 4.067                          | 281.97             | 1146.83            | 5.670                          | 250.48             | 1420.12            |
| A_68_P25806165 | chr8:41596899-41596943                            | NM_033560:-216     | Vps37a        | DIVERGENT_PROMOTER     | 1.394                                                        | 2.268                          | 3052.89            | 6923.55            | 3.162                          | 2440.41            | 7716.95            |
| A_68_P32414051 | chrX:57657552-57657596                            | NM_001001798:-418  | Atp11c        | PROMOTER               | 1.393                                                        | 3.236                          | 1169.61            | 3785.34            | 4.509                          | 898.54             | 4051.94            |
| A_68_P25091981 | chr7:52489690-52489734                            | NM_007645:4497     | Cd37          | INSIDE                 | 1.393                                                        | 3.706                          | 1418.20            | 5256.43            | 5.164                          | 1190.30            | 6146.77            |
| A_68_P25187993 | chr7:73532543-73532587                            | NM_146191:663      | Lrrk1         | INSIDE                 | 1.393                                                        | 1.898                          | 3028.57            | 5747.25            | 2.644                          | 2787.26            | 7368.42            |
| A_68_P25016747 | chr7:28118579-28118623                            | NM_001113549:67    | Ltbp4         | INSIDE                 | 1.393                                                        | 3.093                          | 2893.09            | 8948.48            | 4.309                          | 2424.53            | 10446.94           |
| A_68_P31866300 | chr18:80904546-80904590                           | NM_00116411:344    | Nfatc1        | INSIDE                 | 1.393                                                        | 3.042                          | 622.87             | 1894.76            | 4.238                          | 571.47             | 2421.71            |
| A_68_P29294054 | chr13:105844417-105844461                         | NM_029879:572      | Rgs7bp        | INSIDE                 | 1.393                                                        | 4.855                          | 1066.43            | 5177.25            | 6.761                          | 999.80             | 6759.52            |
| A_68_P23012913 | chr4:71860924-71860968                            | NM_011599:1007     | Tle1          | INSIDE                 | 1.393                                                        | 1.763                          | 2197.50            | 3873.44            | 2.456                          | 1831.01            | 4496.95            |
| A_68_P20804421 | chr1:169238701-169238745                          | NM_001039483:-78   | Tmeo1         | PROMOTER               | 1.393                                                        | 1.455                          | 3612.53            | 5257.39            | 2.028                          | 2927.21            | 5935.77            |

| ProbeName      | Target position of probe on CpG island microarray | TargetID                 | GeneSymbol    | CpG island Description | Ratio of relative methylation (TiO <sub>2</sub> -NP/Vehicle) | Sham group                     |                    |                    | TiO <sub>2</sub> -H group      |                    |                    |
|----------------|---------------------------------------------------|--------------------------|---------------|------------------------|--------------------------------------------------------------|--------------------------------|--------------------|--------------------|--------------------------------|--------------------|--------------------|
|                |                                                   |                          |               |                        |                                                              | Relative methylation (Cy5/Cy3) | Cy3 signal (Input) | Cy5 signal (MeDIP) | Relative methylation (Cy5/Cy3) | Cy3 signal (Input) | Cy5 signal (MeDIP) |
| A_68_P25508612 | chr7:135153559-135153603                          | NM_001079932:5689        | Trim72        | INSIDE                 | 1.393                                                        | 3.632                          | 6264.66            | 22752.62           | 5.060                          | 4584.63            | 23199.60           |
| A_68_P30446388 | chr15:93166877-93166921                           | NM_024189:468            | Yaf2          | INSIDE                 | 1.393                                                        | 1.789                          | 459.90             | 822.73             | 2.492                          | 410.73             | 1023.67            |
| A_68_P27473557 | chr10:115550809-115550853                         | NM_001161855:143         | 4933416C03Rik | INSIDE                 | 1.392                                                        | 1.775                          | 841.21             | 1492.90            | 2.471                          | 700.50             | 1730.61            |
| A_68_P23952640 | chr5:104937435-104937479                          | NM_001166581:86          | BC005561      | INSIDE                 | 1.392                                                        | 3.221                          | 917.87             | 2956.25            | 4.484                          | 900.73             | 4038.50            |
| A_68_P31602500 | chr18:32537426-32537470                           | NM_001083334:578         | Bin1          | INSIDE                 | 1.392                                                        | 2.016                          | 1367.56            | 2757.24            | 2.807                          | 1075.46            | 3018.73            |
| A_68_P32121152 | chr19:42507077-42507121                           | NM_145123:-825           | Crtac1        | PROMOTER               | 1.392                                                        | 1.346                          | 2500.39            | 3365.95            | 1.874                          | 2134.04            | 3999.26            |
| A_68_P32224194 | chr19:60302569-60302613                           | NM_029648:10             | D19ErtD737c   | INSIDE                 | 1.392                                                        | 2.462                          | 712.38             | 1753.56            | 3.427                          | 651.94             | 2234.20            |
| A_68_P21708094 | chr2:144425869-144425913                          | NM_025314:202            | Dtd1          | INSIDE                 | 1.392                                                        | 2.707                          | 1902.22            | 5149.00            | 3.769                          | 1721.20            | 6486.54            |
| A_68_P30287849 | chr15:65618481-65618525                           | NM_133766:-100           | Efr3a         | PROMOTER               | 1.392                                                        | 2.069                          | 456.57             | 944.77             | 2.880                          | 376.12             | 1083.26            |
| A_68_P32087899 | chr19:36132232-36132276                           | NM_008315:-404           | Htr7          | PROMOTER               | 1.392                                                        | 3.060                          | 1869.92            | 5721.76            | 4.258                          | 1584.05            | 6744.81            |
| A_68_P26258349 | chr8:129107965-129108009                          | NM_001164598:9350        | Irf2bp2       | DOWNSTREAM             | 1.392                                                        | 4.946                          | 787.26             | 3893.53            | 6.883                          | 617.74             | 4252.15            |
| A_68_P22530174 | chr3:130815152-130815196                          | NM_010703:1786           | Lef1          | INSIDE                 | 1.392                                                        | 1.934                          | 1766.84            | 3416.36            | 2.691                          | 1447.40            | 3894.72            |
| A_68_P22289187 | chr3:83959390-83959434                            | NM_029797:296            | Mnd1          | INSIDE                 | 1.392                                                        | 3.022                          | 590.88             | 1785.42            | 4.205                          | 507.76             | 2135.18            |
| A_68_P26770183 | chr9:100446090-100446134                          | NM_010878:360            | Neck1         | INSIDE                 | 1.392                                                        | 1.694                          | 1160.50            | 1966.16            | 2.359                          | 1027.67            | 2424.48            |
| A_68_P21630523 | chr2:130402275-130402319                          | NM_011025:388            | Oxt           | INSIDE                 | 1.392                                                        | 2.016                          | 2820.56            | 5687.33            | 2.807                          | 2397.92            | 6731.12            |
| A_68_P29011801 | chr13:47218477-47218521                           | NM_146042:410            | Rnf144b       | INSIDE                 | 1.392                                                        | 1.546                          | 1748.77            | 2703.86            | 2.152                          | 1491.46            | 3209.47            |
| A_68_P23328080 | chr4:134908744-134908788                          | NM_001130477:363         | Srrm1         | INSIDE                 | 1.392                                                        | 2.562                          | 1269.99            | 3254.29            | 3.567                          | 1131.87            | 4036.84            |
| A_68_P30784286 | chr16:57122130-57122174                           | NM_138599:326            | Tomm70a       | INSIDE                 | 1.392                                                        | 5.873                          | 2134.34            | 12535.32           | 8.177                          | 1613.28            | 13192.50           |
| A_68_P31509672 | chr18:14129799-14129843                           | NM_145492:1422           | Zfp521        | INSIDE                 | 1.392                                                        | 1.346                          | 2572.26            | 3462.43            | 1.874                          | 2083.95            | 3905.19            |
| A_68_P28729767 | chr12:109996277-109996321                         |                          | Unknown       |                        | 1.392                                                        | 2.215                          | 2800.23            | 6201.96            | 3.083                          | 2176.21            | 6709.01            |
| A_68_P23767822 | chr5:67818022-67818066                            | NM_001164806:994         | Bend4         | INSIDE                 | 1.391                                                        | 1.964                          | 2706.33            | 5314.51            | 2.732                          | 2302.94            | 6292.60            |
| A_68_P29787829 | chr14:87541024-87541070                           | NM_019670:-125           | Diap3         | PROMOTER               | 1.391                                                        | 1.480                          | 4821.44            | 7138.04            | 2.060                          | 3649.49            | 7516.66            |
| A_68_P31201910 | chr17:45710240-45710284                           | NM_008302:-52            | Hsp90ab1      | PROMOTER               | 1.391                                                        | 1.931                          | 2513.45            | 4852.98            | 2.685                          | 2103.94            | 5649.86            |
| A_68_P24431605 | chr6:49164853-49164897                            | NM_023670:79             | Igfbp2        | INSIDE                 | 1.391                                                        | 1.783                          | 1060.06            | 1890.47            | 2.481                          | 892.70             | 2215.10            |
| A_68_P20832387 | chr1:174255748-174255792                          | NM_008429:3624           | Kcnj9         | INSIDE                 | 1.391                                                        | 3.128                          | 3509.47            | 10978.33           | 4.352                          | 2542.31            | 11064.65           |
| A_68_P31257382 | chr17:56766395-56766439                           | NM_028782:-90            | Lomp1         | DIVERGENT_PROMOTER     | 1.391                                                        | 2.748                          | 5430.44            | 14925.43           | 3.824                          | 3946.84            | 15092.92           |
| A_68_P22190750 | chr3:63100022-63100066                            | NM_008604:251            | Mme           | INSIDE                 | 1.391                                                        | 3.594                          | 1374.41            | 4939.93            | 4.998                          | 1143.34            | 5714.37            |
| A_68_P31187137 | chr17:43153945-43153989                           | NM_178589:463            | Tnfrsf21      | INSIDE                 | 1.391                                                        | 2.094                          | 2666.64            | 5583.34            | 2.912                          | 2260.14            | 6581.90            |
| A_68_P28818477 | chr13:9763394-9763438                             | NM_001199141:1144        | Zmynd11       | INSIDE                 | 1.391                                                        | 2.739                          | 1885.24            | 5162.99            | 3.810                          | 1673.44            | 6376.01            |
| A_68_P32565209 | chrX:98893628-98893674                            | ENSMUST00000073812:-6461 |               | PROMOTER               | 1.391                                                        | 3.079                          | 936.61             | 2883.76            | 4.284                          | 327.68             | 1403.82            |
| A_68_P30931273 | chr16:85802461-85802505                           | NM_009621:878            | Adams1        | INSIDE                 | 1.390                                                        | 3.403                          | 1563.18            | 5318.88            | 4.729                          | 1329.86            | 6288.30            |
| A_68_P24593651 | chr6:83407070-83407114                            | NR_028382:15344          | B230319C09Rik | DOWNSTREAM             | 1.390                                                        | 1.651                          | 1604.03            | 2648.16            | 2.295                          | 1366.64            | 3136.95            |
| A_68_P28191921 | chr11:121534336-121534380                         | NM_178664:107            | B3gnt1        | INSIDE                 | 1.390                                                        | 2.023                          | 813.65             | 1646.24            | 2.813                          | 683.65             | 1922.94            |
| A_68_P31166953 | chr17:37183108-37183152                           | NM_019439:220            | Gabbr1        | INSIDE                 | 1.390                                                        | 2.246                          | 545.54             | 1225.43            | 3.122                          | 433.24             | 1352.77            |
| A_68_P20293513 | chr1:64663621-64663665                            | NM_025964:100            | Mettl21a      | INSIDE                 | 1.390                                                        | 7.059                          | 1748.89            | 12345.54           | 9.810                          | 1306.19            | 12813.78           |
| A_68_P21934677 | chr3:8923780-8923824                              | NM_025434:55             | Mrps28        | INSIDE                 | 1.390                                                        | 2.404                          | 1130.38            | 2717.52            | 3.342                          | 1012.75            | 3384.86            |
| A_68_P32082675 | chr19:34953035-34953079                           | NM_023792:-649           | Pank1         | PROMOTER               | 1.390                                                        | 1.862                          | 609.80             | 1135.72            | 2.588                          | 620.50             | 1605.87            |
| A_68_P26760867 | chr9:98743140-98743184                            | NM_001134660:157         | Prr23a        | INSIDE                 | 1.390                                                        | 3.725                          | 2610.95            | 9724.83            | 5.178                          | 2298.06            | 11898.87           |
| A_68_P23794550 | chr5:73305332-73305376                            | NM_001113423:-201        | Slain2        | PROMOTER               | 1.390                                                        | 1.421                          | 1679.49            | 2387.30            | 1.976                          | 1309.27            | 2587.76            |
| A_68_P30487544 | chr15:100592074-100592119                         | NM_021530:-81            | Sle4a8        | PROMOTER               | 1.390                                                        | 1.893                          | 878.86             | 1663.74            | 2.632                          | 686.91             | 1807.95            |
| A_68_P25089709 | chr7:52110332-52110376                            | NM_026270:5758           | Akt1s1        | INSIDE                 | 1.389                                                        | 1.646                          | 1948.90            | 3207.99            | 2.287                          | 1590.76            | 3637.56            |
| A_68_P30337621 | chr15:74350207-74350251                           | NM_174991:3603           | Bai1          | INSIDE                 | 1.389                                                        | 1.830                          | 1937.76            | 3547.01            | 2.542                          | 1660.99            | 4222.91            |
| A_68_P23299543 | chr4:129665364-129665408                          | NM_001199696:3065        | Bai2          | INSIDE                 | 1.389                                                        | 4.824                          | 1005.48            | 4850.09            | 6.698                          | 818.53             | 5482.78            |
| A_68_P27289988 | chr10:80945144-80945188                           | NM_176954:288            | Celf5         | INSIDE                 | 1.389                                                        | 3.138                          | 7031.28            | 22066.79           | 4.360                          | 5090.20            | 22193.73           |
| A_68_P20997455 | chr2:9799133-9799177                              | NM_008091:1073           | Gata3         | INSIDE                 | 1.389                                                        | 2.203                          | 1407.39            | 3101.06            | 3.060                          | 1213.21            | 3711.88            |
| A_68_P27286724 | chr10:80448504-80448548                           | NM_001038655:15584       | Gng7          | INSIDE                 | 1.389                                                        | 2.779                          | 5471.48            | 15203.85           | 3.859                          | 4309.14            | 16628.08           |
| A_68_P26346113 | chr9:21043510-21043554                            | NM_001110305:244         | Keap1         | INSIDE                 | 1.389                                                        | 2.738                          | 1066.07            | 2919.34            | 3.804                          | 977.31             | 3717.21            |
| A_68_P31462886 | chr18:4375807-4375851                             | NM_026157:239            | Mtpap         | INSIDE                 | 1.389                                                        | 1.781                          | 1407.85            | 2507.38            | 2.473                          | 1354.18            | 3349.23            |
| A_68_P23637417 | chr5:42154620-42154664                            | NM_007524:817            | Nkx3-2        | INSIDE                 | 1.389                                                        | 1.588                          | 3754.70            | 5962.47            | 2.206                          | 2920.74            | 6441.82            |
| A_68_P31757535 | chr18:61559223-61559268                           | NM_133249:840            | Ppargc1b      | INSIDE                 | 1.389                                                        | 2.054                          | 4873.75            | 10011.88           | 2.854                          | 3783.56            | 10798.66           |
| A_68_P21769250 | chr2:155890860-155890904                          | NM_139151:-66            | Spag4         | PROMOTER               | 1.389                                                        | 2.324                          | 596.43             | 1386.03            | 3.229                          | 546.75             | 1765.42            |

| ProbeName      | Target position of probe on CpG island microarray | TargetID             | GeneSymbol    | CpG island Description | Ratio of relative methylation (TiO <sub>2</sub> -NP/Vehicle) | Sham group                     |                    |                    | TiO <sub>2</sub> -H group      |                    |                    |
|----------------|---------------------------------------------------|----------------------|---------------|------------------------|--------------------------------------------------------------|--------------------------------|--------------------|--------------------|--------------------------------|--------------------|--------------------|
|                |                                                   |                      |               |                        |                                                              | Relative methylation (Cy5/Cy3) | Cy3 signal (Input) | Cy5 signal (MeDIP) | Relative methylation (Cy5/Cy3) | Cy3 signal (Input) | Cy5 signal (MeDIP) |
| A_68_P27644767 | chr11:23156427-23156471                           | NM_001035226:408     | Xpo1          | INSIDE                 | 1.389                                                        | 1.998                          | 524.57             | 1048.31            | 2.776                          | 417.92             | 1160.20            |
| A_68_P28048035 | chr11:96858653-96858697                           |                      |               | Unknown                | 1.389                                                        | 2.884                          | 1597.67            | 4607.66            | 4.006                          | 1231.51            | 4933.87            |
| A_68_P22262794 | chr3:79090694-79090738                            | AK032506:-597        |               | PROMOTER               | 1.389                                                        | 1.987                          | 809.05             | 1607.50            | 2.761                          | 754.96             | 2084.19            |
| A_68_P32589659 | chrX:105011372-105011416                          | NM_025921:279        | 2610002M06Rik | INSIDE                 | 1.388                                                        | 3.761                          | 4965.52            | 18676.02           | 5.219                          | 2295.18            | 11979.46           |
| A_68_P24134879 | chr5:139801058-139801102                          | NM_172723:338        | Adap1         | INSIDE                 | 1.388                                                        | 0.416                          | 3250.82            | 1352.27            | 0.577                          | 2894.34            | 1671.39            |
| A_68_P31516123 | chr18:15309505-15309549                           | NM_134112:429        | Ketd1         | INSIDE                 | 1.388                                                        | 1.414                          | 3242.69            | 4584.00            | 1.962                          | 2543.33            | 4989.28            |
| A_68_P28738216 | chr12:111684724-111684768                         | NM_001135001:-642    | Ppp2r5c       | PROMOTER               | 1.388                                                        | 2.129                          | 4451.31            | 9478.89            | 2.956                          | 3140.30            | 9281.26            |
| A_68_P20770876 | chr1:163181287-163181331                          | NM_007453:-11        | Prdx6         | PROMOTER               | 1.388                                                        | 1.612                          | 7474.68            | 12051.29           | 2.238                          | 5273.32            | 11802.44           |
| A_68_P22572447 | chr3:138737478-138737522                          | NM_001040690:663     | Rap1gds1      | INSIDE                 | 1.388                                                        | 2.478                          | 2028.06            | 5026.53            | 3.440                          | 1758.57            | 6049.20            |
| A_68_P21557413 | chr2:117168443-117168487                          | NM_011246:149        | Rasgrp1       | INSIDE                 | 1.388                                                        | 2.134                          | 448.72             | 957.44             | 2.961                          | 404.89             | 1198.97            |
| A_68_P29715888 | chr14:73543452-73543496                           | NR_033185:883        | Rcctb2        | INSIDE                 | 1.388                                                        | 2.304                          | 1611.48            | 3712.43            | 3.198                          | 1358.60            | 4344.63            |
| A_68_P26823109 | chr9:110235990-110236034                          | NM_001001144:216     | Scap          | INSIDE                 | 1.388                                                        | 1.776                          | 1006.73            | 1787.90            | 2.465                          | 936.32             | 2308.19            |
| A_68_P30425916 | chr15:89388272-89388316                           | NM_021423:58007      | Shank3        | INSIDE                 | 1.388                                                        | 2.300                          | 963.68             | 2216.92            | 3.194                          | 959.09             | 3063.19            |
| A_68_P30364761 | chr15:78993943-78993987                           | NM_011437:956        | Sox10         | INSIDE                 | 1.388                                                        | 1.372                          | 1741.41            | 2389.96            | 1.905                          | 1480.70            | 2820.63            |
| A_68_P23321805 | chr4:133805694-133805738                          | NM_024215:-4210      | Zfp593        | PROMOTER               | 1.388                                                        | 2.078                          | 568.36             | 1181.10            | 2.885                          | 373.34             | 1077.17            |
| A_68_P26350214 | chr9:21855080-21855124                            | NM_010487:1365       | Elavl3        | INSIDE                 | 1.387                                                        | 1.879                          | 1127.71            | 2118.45            | 2.605                          | 987.56             | 2572.23            |
| A_68_P31215014 | chr17:48061036-48061080                           | NM_001110824:523     | Foxp4         | INSIDE                 | 1.387                                                        | 3.489                          | 1284.81            | 4483.10            | 4.841                          | 1017.48            | 4925.13            |
| A_68_P21874746 | chr2:174153286-174153330                          | NR_003258:-106       | Gnas          | PROMOTER               | 1.387                                                        | 1.563                          | 557.01             | 870.38             | 2.168                          | 460.07             | 997.43             |
| A_68_P27996400 | chr11:87630599-87630643                           | NM_080420:8996       | Lpo           | INSIDE                 | 1.387                                                        | 2.331                          | 3454.61            | 8052.90            | 3.233                          | 2408.00            | 7783.99            |
| A_68_P31930919 | chr19:5803763-5803807                             | NR_002847:-1113      | Malat1        | PROMOTER               | 1.387                                                        | 3.632                          | 3709.80            | 13474.98           | 5.039                          | 2884.96            | 14537.26           |
| A_68_P25285292 | chr7:91031812-91031856                            | NM_030705:1017       | Mesdc1        | INSIDE                 | 1.387                                                        | 1.854                          | 1987.57            | 3685.71            | 2.573                          | 1610.70            | 4144.00            |
| A_68_P23439968 | chr4:155043128-155043172                          | NM_145124:186        | Mib2          | INSIDE                 | 1.387                                                        | 0.439                          | 1003.59            | 440.94             | 0.609                          | 1058.62            | 645.06             |
| A_68_P31542302 | chr18:21120354-21120398                           | NM_026301:17251      | Rnf125        | INSIDE                 | 1.387                                                        | 3.232                          | 1806.35            | 5838.05            | 4.482                          | 1432.12            | 6418.86            |
| A_68_P32136240 | chr19:45139857-45139901                           | NM_001178012:17813   | Sfxn3         | DOWNSTREAM             | 1.387                                                        | 2.930                          | 1865.52            | 5465.30            | 4.062                          | 1583.58            | 6432.72            |
| A_68_P27288939 | chr10:80795142-80795186                           | NM_009325:3689       | Tbxa2r        | INSIDE                 | 1.387                                                        | 2.434                          | 820.12             | 1996.51            | 3.377                          | 677.70             | 2288.73            |
| A_68_P23255470 | chr4:120887662-120887706                          | ENSMUST00000056635:5 |               | INSIDE                 | 1.387                                                        | 1.989                          | 1497.95            | 2979.89            | 2.760                          | 1185.81            | 3272.51            |
| A_68_P26617806 | chr9:70527432-70527476                            | NM_007399:647        | Adam10        | INSIDE                 | 1.386                                                        | 4.446                          | 897.40             | 3989.47            | 6.163                          | 771.76             | 4756.74            |
| A_68_P27176090 | chr10:60149152-60149197                           | NM_023370:10064      | Cdh23         | INSIDE                 | 1.386                                                        | 10.499                         | 320.92             | 3369.37            | 14.546                         | 282.00             | 4102.07            |
| A_68_P25512010 | chr7:135831942-135831986                          | NM_178641:77086      | Inpp5f        | INSIDE                 | 1.386                                                        | 3.071                          | 1024.72            | 3146.72            | 4.256                          | 926.84             | 3944.48            |
| A_68_P22934417 | chr4:55543327-55543371                            | NM_010637:1999       | Klf4          | INSIDE                 | 1.386                                                        | 2.954                          | 2248.19            | 6640.92            | 4.094                          | 1724.91            | 7061.55            |
| A_68_P31130477 | chr17:30026875-30026919                           | NM_001081160:-2069   | Mdga1         | PROMOTER               | 1.386                                                        | 2.242                          | 770.76             | 1728.12            | 3.107                          | 603.50             | 1875.07            |
| A_68_P27922752 | chr11:74651542-74651586                           | NM_010813:7139       | Mnt           | INSIDE                 | 1.386                                                        | 1.680                          | 496.56             | 834.26             | 2.329                          | 347.28             | 808.66             |
| A_68_P29001573 | chr13:45484920-45484964                           | NM_153789:-168       | Myliip        | PROMOTER               | 1.386                                                        | 2.542                          | 1859.71            | 4727.59            | 3.523                          | 1466.18            | 5165.83            |
| A_68_P31112706 | chr17:26976161-26976205                           | NM_008700:2328       | Nkx2-5        | INSIDE                 | 1.386                                                        | 1.920                          | 555.70             | 1067.23            | 2.663                          | 529.20             | 1409.09            |
| A_68_P20506812 | chr1:108069726-108069770                          | NM_133821:1303       | Phlpp1        | INSIDE                 | 1.386                                                        | 0.442                          | 1093.08            | 482.98             | 0.612                          | 988.03             | 605.05             |
| A_68_P29578876 | chr14:47503079-47503123                           | NM_001037221:461     | Samd4         | INSIDE                 | 1.386                                                        | 2.731                          | 1230.87            | 3361.27            | 3.786                          | 1130.55            | 4279.76            |
| A_68_P23081886 | chr4:86520283-86520327                            | NM_139306:-13        | Acer2         | PROMOTER               | 1.385                                                        | 1.376                          | 1471.41            | 2024.91            | 1.906                          | 1311.14            | 2499.13            |
| A_68_P28081265 | chr11:102622917-102622961                         | NM_001110778:186     | Adam11        | INSIDE                 | 1.385                                                        | 1.343                          | 4557.53            | 6122.12            | 1.860                          | 3493.31            | 6498.27            |
| A_68_P25954612 | chr8:73392998-73393042                            | NM_026964:4369       | Ccdc124       | INSIDE                 | 1.385                                                        | 5.066                          | 149.73             | 758.54             | 7.018                          | 132.41             | 929.27             |
| A_68_P21612764 | chr2:127162058-127162102                          | NM_010090:186        | Dusp2         | INSIDE                 | 1.385                                                        | 3.209                          | 1458.87            | 4681.39            | 4.445                          | 1289.22            | 5730.87            |
| A_68_P30480288 | chr15:99288482-99288527                           | NM_001001884:-325    | Nekap5l       | PROMOTER               | 1.385                                                        | 2.314                          | 337.82             | 781.56             | 3.205                          | 286.71             | 918.82             |
| A_68_P26772514 | chr9:100935310-100935354                          | NM_025835:-38        | Pccb          | PROMOTER               | 1.385                                                        | 2.186                          | 736.85             | 1610.80            | 3.028                          | 620.75             | 1879.44            |
| A_68_P28549418 | chr12:76696906-76696950                           | NM_012024:259        | Ppp2r5c       | INSIDE                 | 1.385                                                        | 1.423                          | 1358.66            | 1932.97            | 1.971                          | 1145.58            | 2257.54            |
| A_68_P30447921 | chr15:93426390-93426434                           | NM_001033217:-90     | Prickle1      | PROMOTER               | 1.385                                                        | 1.576                          | 625.87             | 986.42             | 2.182                          | 603.39             | 1316.77            |
| A_68_P24092506 | chr5:130647910-130647954                          | NM_001199059:244     | Rabgef1       | INSIDE                 | 1.385                                                        | 1.536                          | 704.41             | 1081.84            | 2.128                          | 612.31             | 1302.86            |
| A_68_P26782297 | chr9:102737533-102737577                          | NM_001042607:305     | Ryk           | INSIDE                 | 1.385                                                        | 1.916                          | 530.94             | 1017.41            | 2.654                          | 555.68             | 1474.61            |
| A_68_P31386733 | chr17:81464391-81464435                           | NM_028138:13         | Thumpd2       | INSIDE                 | 1.385                                                        | 2.672                          | 501.61             | 1340.18            | 3.699                          | 445.20             | 1646.93            |
| A_68_P22594408 | chr3:142763801-142763845                          |                      |               | Unknown                | 1.385                                                        | 2.405                          | 1253.99            | 3015.34            | 3.331                          | 1139.39            | 3794.97            |
| A_68_P27938081 | chr11:77329399-77329443                           | NM_026185:802        | Abhd15        | INSIDE                 | 1.384                                                        | 1.651                          | 1075.96            | 1776.09            | 2.285                          | 893.15             | 2041.00            |
| A_68_P31097619 | chr17:24625915-24625959                           | NM_027937:209        | Caskin1       | INSIDE                 | 1.384                                                        | 6.079                          | 2677.94            | 16279.90           | 8.413                          | 2045.41            | 17207.47           |
| A_68_P23203782 | chr4:109656380-109656424                          | NM_172296:5773       | Dmtra2        | DOWNSTREAM             | 1.384                                                        | 3.514                          | 1461.45            | 5135.93            | 4.864                          | 1229.56            | 5980.70            |

| ProbeName      | Target position of probe on CpG island microarray | TargetID            | GeneSymbol    | CpG island Description | Ratio of relative methylation (TiO <sub>2</sub> -NP/Vehicle) | Sham group                     |                    |                    | TiO <sub>2</sub> -H group      |                    |                    |
|----------------|---------------------------------------------------|---------------------|---------------|------------------------|--------------------------------------------------------------|--------------------------------|--------------------|--------------------|--------------------------------|--------------------|--------------------|
|                |                                                   |                     |               |                        |                                                              | Relative methylation (Cy5/Cy3) | Cy3 signal (Input) | Cy5 signal (MeDIP) | Relative methylation (Cy5/Cy3) | Cy3 signal (Input) | Cy5 signal (MeDIP) |
| A_68_P29626310 | chr14:57752221-57752265                           | NM_008128-8184      | Gjb6          | PROMOTER               | 1.384                                                        | 2.282                          | 684.04             | 1561.29            | 3.159                          | 668.13             | 2110.85            |
| A_68_P25023673 | chr7:29596377-29596421                            | NM_177301-490       | Hnrnp1        | INSIDE                 | 1.384                                                        | 2.347                          | 1864.68            | 4377.06            | 3.249                          | 1656.71            | 5383.10            |
| A_68_P28530098 | chr12:73186548-73186592                           | NM_001205067-255    | Jkamp         | DIVERGENT_PROMOTER     | 1.384                                                        | 2.022                          | 1860.70            | 3762.19            | 2.798                          | 1158.76            | 3241.72            |
| A_68_P25176079 | chr7:71432668-71432712                            | NM_172742-135       | Mtmr10        | INSIDE                 | 1.384                                                        | 2.188                          | 1366.94            | 2991.38            | 3.028                          | 1213.24            | 3673.97            |
| A_68_P25016937 | chr7:28149369-28149413                            | NM_001199235-30135  | Spnb4         | INSIDE                 | 1.384                                                        | 4.256                          | 450.84             | 1918.83            | 5.890                          | 388.56             | 2288.49            |
| A_68_P24929724 | chr6:146582793-146582837                          | NM_026281-300       | Tm7sf3        | INSIDE                 | 1.384                                                        | 2.488                          | 1029.62            | 2561.28            | 3.444                          | 814.79             | 2806.13            |
| A_68_P20444766 | chr1:93698474-93698518                            | NM_007855-443       | Twist2        | INSIDE                 | 1.384                                                        | 2.254                          | 2341.47            | 5277.33            | 3.120                          | 1896.89            | 5918.08            |
| A_68_P31292365 | chr17:64199012-64199056                           |                     |               | Unknown                | 1.384                                                        | 1.783                          | 1971.01            | 3513.41            | 2.468                          | 1488.53            | 3673.51            |
| A_68_P30221125 | chr15:53177961-53178005                           | NM_010162-244       | Ext1          | PROMOTER               | 1.383                                                        | 1.695                          | 850.39             | 1441.42            | 2.345                          | 757.81             | 1776.96            |
| A_68_P24932468 | chr6:147040234-147040278                          | NM_001081237-660    | Klhdc5        | INSIDE                 | 1.383                                                        | 4.799                          | 492.26             | 2362.45            | 6.635                          | 486.13             | 3225.65            |
| A_68_P28246270 | chr12:12944193-12944237                           | NM_008709-4428      | Mycn          | INSIDE                 | 1.383                                                        | 1.799                          | 1343.75            | 2416.97            | 2.488                          | 1094.02            | 2721.69            |
| A_68_P31848618 | chr18:77803995-77804039                           | NM_001164504-141    | Rnf165        | PROMOTER               | 1.383                                                        | 1.500                          | 1536.57            | 2304.59            | 2.074                          | 1326.48            | 2750.58            |
| A_68_P31120665 | chr17:28278842-28278886                           | NM_001004366-606    | Scube3        | PROMOTER               | 1.383                                                        | 3.106                          | 1273.71            | 3956.08            | 4.294                          | 1103.17            | 4737.50            |
| A_68_P31682245 | chr18:47528367-47528411                           | NM_018744-134       | Sema6a        | INSIDE                 | 1.383                                                        | 2.207                          | 659.59             | 1455.48            | 3.051                          | 574.22             | 1751.82            |
| A_68_P25716368 | chr8:24522869-24522913                            | NM_013834-917       | Sfrp1         | INSIDE                 | 1.383                                                        | 1.613                          | 2227.30            | 3593.62            | 2.231                          | 1935.21            | 4317.32            |
| A_68_P24039145 | chr5:120961107-120961151                          | NM_001177594-72     | Sle24a6       | DIVERGENT_PROMOTER     | 1.383                                                        | 1.486                          | 4781.84            | 7103.62            | 2.054                          | 3617.40            | 7431.95            |
| A_68_P23364649 | chr4:141094339-141094383                          | NM_019763-152       | Spen          | INSIDE                 | 1.383                                                        | 1.992                          | 2347.37            | 4676.34            | 2.756                          | 1958.71            | 5398.44            |
| A_68_P23238477 | chr4:117807306-117807350                          | NM_009176-167       | St3gal3       | INSIDE                 | 1.383                                                        | 2.005                          | 540.61             | 1083.76            | 2.773                          | 510.76             | 1416.34            |
| A_68_P29072110 | chr13:58316632-58316676                           | NM_026842-360       | Ublqn1        | INSIDE                 | 1.383                                                        | 2.096                          | 560.88             | 1175.53            | 2.898                          | 535.81             | 1552.68            |
| A_68_P30382917 | chr15:82176766-82176812                           | NM_026914-313       | 1500032L24Rik | INSIDE                 | 1.382                                                        | 3.347                          | 912.41             | 3053.90            | 4.627                          | 745.99             | 3451.56            |
| A_68_P26920734 | chr10:7500514-7500558                             | NM_145418-179       | BC013529      | INSIDE                 | 1.382                                                        | 1.710                          | 990.54             | 1693.60            | 2.363                          | 880.38             | 2080.26            |
| A_68_P21111660 | chr2:31701435-31701479                            | NM_178887-69        | Fibcd1        | INSIDE                 | 1.382                                                        | 2.715                          | 1341.96            | 3643.49            | 3.753                          | 1101.84            | 4135.43            |
| A_68_P22081213 | chr3:40549234-40549278                            | NM_011020-278       | Hspa41        | PROMOTER               | 1.382                                                        | 2.443                          | 1011.96            | 2472.12            | 3.375                          | 784.50             | 2647.61            |
| A_68_P28055738 | chr11:98195652-98195696                           | NM_010895-4715      | Neurod2       | PROMOTER               | 1.382                                                        | 1.669                          | 2668.79            | 4452.94            | 2.306                          | 2176.79            | 5019.22            |
| A_68_P31921055 | chr19:4101179-4101223                             | NM_008851-579       | Pitpnm1       | INSIDE                 | 1.382                                                        | 1.719                          | 420.25             | 722.25             | 2.375                          | 310.95             | 738.64             |
| A_68_P26079858 | chr8:97381751-97381795                            | NM_009090-423       | Poir2c        | INSIDE                 | 1.382                                                        | 2.436                          | 1507.50            | 3672.30            | 3.366                          | 1204.30            | 4054.04            |
| A_68_P23668870 | chr5:48377571-48377615                            | NM_178804-3199      | Slit2         | INSIDE                 | 1.382                                                        | 2.559                          | 2256.35            | 5774.06            | 3.537                          | 1713.19            | 6600.08            |
| A_68_P26504312 | chr9:50369341-50369385                            | NM_025687-11        | Tex12         | INSIDE                 | 1.382                                                        | 3.272                          | 1507.58            | 4933.34            | 4.523                          | 1344.59            | 6081.12            |
| A_68_P24115622 | chr5:135752511-135752555                          |                     |               | Unknown                | 1.382                                                        | 2.149                          | 2790.05            | 5996.38            | 2.970                          | 2278.78            | 6767.93            |
| A_68_P31933962 | chr19:6320206-6320250                             | NM_001033342-13772  | Cdc42bpg      | INSIDE                 | 1.381                                                        | 3.899                          | 1882.50            | 7340.23            | 5.385                          | 1508.45            | 8123.72            |
| A_68_P32820569 | chrX:165758461-165758505                          | NM_008222-207       | Hccs          | PROMOTER               | 1.381                                                        | 3.000                          | 691.81             | 2075.27            | 4.142                          | 442.18             | 1831.64            |
| A_68_P25005400 | chr7:25318962-25319006                            | NM_153134-3318      | Irgq          | INSIDE                 | 1.381                                                        | 2.764                          | 1793.18            | 4955.65            | 3.818                          | 1547.70            | 5908.62            |
| A_68_P28998903 | chr13:44998308-44998352                           | NM_001205043-171691 | Jarid2        | INSIDE                 | 1.381                                                        | 3.750                          | 2610.28            | 9788.20            | 5.180                          | 2206.54            | 11430.73           |
| A_68_P32122315 | chr19:42687286-42687330                           | NM_001164311-12     | Loxl4         | PROMOTER               | 1.381                                                        | 5.696                          | 2747.26            | 15647.16           | 7.863                          | 2171.28            | 17072.43           |
| A_68_P23985655 | chr5:111846403-111846447                          | NM_001081235-761    | Mn1           | PROMOTER               | 1.381                                                        | 3.121                          | 952.83             | 2973.79            | 4.311                          | 746.99             | 3220.03            |
| A_68_P23292285 | chr4:128332448-128332492                          | NM_001195130-525    | Pbc2          | INSIDE                 | 1.381                                                        | 2.352                          | 1220.71            | 2871.13            | 3.248                          | 867.57             | 2817.74            |
| A_68_P21432198 | chr2:92885847-92885891                            | NM_001177536-433    | Prdm11        | INSIDE                 | 1.381                                                        | 2.016                          | 2664.89            | 5372.70            | 2.784                          | 2130.21            | 5930.78            |
| A_68_P22883652 | chr4:45543353-45543397                            | NM_001033306-326    | Shb           | INSIDE                 | 1.381                                                        | 1.440                          | 1244.64            | 1792.30            | 1.989                          | 1018.36            | 2025.13            |
| A_68_P29936814 | chr14:118531918-118531962                         | NM_029578-47        | Tgds          | INSIDE                 | 1.381                                                        | 2.107                          | 848.15             | 1787.14            | 2.909                          | 718.51             | 2090.03            |
| A_68_P20046436 | chr1:14496639-14496683                            |                     |               | Unknown                | 1.381                                                        | 1.790                          | 1532.18            | 2743.32            | 2.473                          | 1331.58            | 3292.41            |
| A_68_P22832218 | chr4:34663760-34663804                            | NM_027041-13673     | 1700003M02Rik | INSIDE                 | 1.380                                                        | 2.400                          | 327.86             | 786.83             | 3.313                          | 316.86             | 1049.66            |
| A_68_P23225501 | chr4:115410210-115410254                          | NM_172698-445       | 4732418C07Rik | PROMOTER               | 1.380                                                        | 1.596                          | 2393.59            | 3820.41            | 2.202                          | 1950.35            | 4295.52            |
| A_68_P23966390 | chr5:107760143-107760187                          | NM_001079873-48     | Brdt          | PROMOTER               | 1.380                                                        | 1.925                          | 1143.18            | 2200.75            | 2.657                          | 1031.75            | 2741.32            |
| A_68_P30589166 | chr16:20716372-20716416                           | NM_009900-315       | Clen2         | INSIDE                 | 1.380                                                        | 1.526                          | 1428.09            | 2178.81            | 2.105                          | 1153.03            | 2427.48            |
| A_68_P23222742 | chr4:114659539-114659583                          | NM_025647-273       | Cmpk1         | INSIDE                 | 1.380                                                        | 5.083                          | 1829.05            | 9297.78            | 7.013                          | 1581.23            | 11088.78           |
| A_68_P31694513 | chr18:49915007-49915051                           | NM_001170960-227    | Dtwd2         | INSIDE                 | 1.380                                                        | 4.950                          | 2036.11            | 10079.53           | 6.830                          | 1655.93            | 11309.80           |
| A_68_P22009690 | chr3:27052485-27052529                            | NM_001177625-270    | Ect2          | INSIDE                 | 1.380                                                        | 1.652                          | 4969.44            | 8207.66            | 2.280                          | 3935.17            | 8970.84            |
| A_68_P27284175 | chr10:80049466-80049510                           | NM_145421-3598      | Fam108a       | INSIDE                 | 1.380                                                        | 4.596                          | 1189.87            | 5468.94            | 6.343                          | 1018.45            | 6459.94            |
| A_68_P22702204 | chr4:5571466-5571510                              | NM_173426-163       | Fam110b       | INSIDE                 | 1.380                                                        | 1.694                          | 809.27             | 1370.98            | 2.338                          | 736.49             | 1722.06            |
| A_68_P24429121 | chr6:48693073-48693117                            | NM_008376-4049      | Gimap1        | INSIDE                 | 1.380                                                        | 2.233                          | 1776.08            | 3965.19            | 3.080                          | 1429.23            | 4401.83            |
| A_68_P23333240 | chr4:135866700-135866744                          | NM_028871-168       | Hnrmp1        | PROMOTER               | 1.380                                                        | 2.154                          | 1180.61            | 2542.84            | 2.972                          | 1064.75            | 3164.30            |

| ProbeName      | Target position of probe on CpG island microarray | TargetID            | GeneSymbol    | CpG island Description | Ratio of relative methylation (TiO <sub>2</sub> -NP/Vehicle) | Sham group                     |                    |                    | TiO <sub>2</sub> -H group      |                    |                    |
|----------------|---------------------------------------------------|---------------------|---------------|------------------------|--------------------------------------------------------------|--------------------------------|--------------------|--------------------|--------------------------------|--------------------|--------------------|
|                |                                                   |                     |               |                        |                                                              | Relative methylation (Cy5/Cy3) | Cy3 signal (Input) | Cy5 signal (MeDIP) | Relative methylation (Cy5/Cy3) | Cy3 signal (Input) | Cy5 signal (MeDIP) |
| A_68_P28185589 | chr11:120469914-120469958                         | NM_153288:146       | Npb           | INSIDE                 | 1.380                                                        | 1.724                          | 626.95             | 1080.66            | 2.378                          | 563.76             | 1340.59            |
| A_68_P23696527 | chr5:53133072-53133116                            | NM_025951:282       | Pi4k2b        | INSIDE                 | 1.380                                                        | 3.064                          | 616.45             | 1889.00            | 4.230                          | 538.73             | 2278.62            |
| A_68_P23374912 | chr4:142984306-142984350                          | NM_031377:-15       | Pramel1       | PROMOTER               | 1.380                                                        | 6.083                          | 4431.85            | 26959.06           | 8.397                          | 3035.40            | 25488.68           |
| A_68_P20779531 | chr1:164670132-164670176                          | NM_001081290:533    | Prrc2c        | INSIDE                 | 1.380                                                        | 1.464                          | 1019.61            | 1492.29            | 2.019                          | 862.65             | 1741.74            |
| A_68_P30990391 | chr16:96212295-96212339                           | NM_019537:194       | Psmg1         | INSIDE                 | 1.380                                                        | 1.645                          | 2589.44            | 4259.35            | 2.270                          | 2009.46            | 4560.84            |
| A_68_P27901831 | chr11:70460715-70460759                           | NM_024211:-241      | Sle25a11      | DIVERGENT_PROMOTER     | 1.380                                                        | 2.844                          | 1614.27            | 4590.39            | 3.925                          | 1332.11            | 5228.40            |
| A_68_P20172918 | chr1:40738845-40738889                            | NM_001033289:310    | Sle9a2        | INSIDE                 | 1.380                                                        | 1.589                          | 1993.26            | 3167.76            | 2.193                          | 1698.03            | 3723.11            |
| A_68_P31846337 | chr18:77424326-77424370                           | NM_013666:-237      | St8sia5       | PROMOTER               | 1.380                                                        | 1.438                          | 1106.77            | 1591.43            | 1.984                          | 926.23             | 1837.71            |
| A_68_P22889661 | chr4:46627029-46627073                            | NM_198664:36021     | Tbc1d2        | INSIDE                 | 1.380                                                        | 2.524                          | 978.10             | 2468.45            | 3.482                          | 838.18             | 2918.50            |
| A_68_P29506489 | chr14:31362538-31362582                           | NM_009388:226       | Tkt           | INSIDE                 | 1.380                                                        | 4.247                          | 1327.69            | 5639.28            | 5.860                          | 1239.52            | 7264.01            |
| A_68_P24155694 | chr5:144016617-144016661                          | NM_017467:15063     | Zfp316        | INSIDE                 | 1.380                                                        | 4.227                          | 2787.80            | 11782.74           | 5.832                          | 3116.04            | 18172.71           |
| A_68_P31755200 | chr18:61195546-61195590                           | NM_009880:285       | Cdx1          | INSIDE                 | 1.379                                                        | 3.032                          | 739.77             | 2242.91            | 4.181                          | 703.01             | 2939.13            |
| A_68_P25564249 | chr7:144390277-144390323                          | NM_001113414:115828 | Ebf3          | INSIDE                 | 1.379                                                        | 8.357                          | 3043.67            | 25435.00           | 11.525                         | 2012.21            | 23191.66           |
| A_68_P24477004 | chr6:56782166-56782210                            | NM_012056:136       | Fkbp9         | INSIDE                 | 1.379                                                        | 3.039                          | 1936.77            | 5886.78            | 4.190                          | 1684.97            | 7060.59            |
| A_68_P24129311 | chr5:138635844-138635888                          | NM_177878:325       | Mblac1        | INSIDE                 | 1.379                                                        | 1.861                          | 1250.14            | 2326.95            | 2.566                          | 1257.67            | 3227.68            |
| A_68_P30252139 | chr15:58912975-58913019                           | NM_001146180:585    | Mtss1         | INSIDE                 | 1.379                                                        | 4.491                          | 2342.42            | 10520.33           | 6.192                          | 1909.09            | 11820.70           |
| A_68_P23281395 | chr4:126355065-126355109                          | NM_011970:200       | Psmb2         | INSIDE                 | 1.379                                                        | 1.555                          | 610.53             | 949.65             | 2.145                          | 491.93             | 1055.12            |
| A_68_P30546791 | chr16:11203150-11203194                           | NM_025546:213       | Rsl1d1        | INSIDE                 | 1.379                                                        | 2.630                          | 4731.03            | 12440.96           | 3.626                          | 4018.95            | 14572.39           |
| A_68_P26506991 | chr9:50816720-50816764                            | NM_178710:436       | Sik2          | INSIDE                 | 1.379                                                        | 1.394                          | 3412.25            | 4755.79            | 1.922                          | 2627.82            | 5049.66            |
| A_68_P30436285 | chr15:91403260-91403304                           | NM_001033633:410    | Sle2a13       | INSIDE                 | 1.379                                                        | 6.148                          | 784.46             | 4822.57            | 8.478                          | 676.56             | 5735.66            |
| A_68_P20456741 | chr1:95532187-95532231                            | NM_021537:96        | Stk25         | INSIDE                 | 1.379                                                        | 2.702                          | 1331.87            | 3598.85            | 3.726                          | 1122.47            | 4182.07            |
| A_68_P32806692 | chrX:162947996-162948040                          | NM_001007577:392    | Tecanc        | INSIDE                 | 1.379                                                        | 2.785                          | 1571.63            | 4377.73            | 3.842                          | 810.69             | 3114.39            |
| A_68_P31385964 | chr17:81344186-81344230                           | NM_026516:237       | Tmem178       | INSIDE                 | 1.379                                                        | 1.688                          | 2239.28            | 3779.05            | 2.328                          | 1997.79            | 4650.03            |
| A_68_P31320413 | chr17:69190632-69190676                           | NM_001206661:4179   | Tmem200c      | INSIDE                 | 1.379                                                        | 3.280                          | 1315.62            | 4315.33            | 4.524                          | 1228.76            | 5558.54            |
| A_68_P32744218 | chrX:147530920-147530964                          | NM_001164578:144    | Tsr2          | INSIDE                 | 1.379                                                        | 1.849                          | 1593.64            | 2946.93            | 2.549                          | 884.15             | 2253.95            |
| A_68_P28029564 | chr11:93746411-93746455                           | NM_001013375:648    | Utp18         | INSIDE                 | 1.379                                                        | 3.233                          | 7724.07            | 24970.39           | 4.457                          | 6462.51            | 28801.15           |
| A_68_P29623591 | chr14:57190486-57190530                           | NM_001014996:175    | Cenpj         | INSIDE                 | 1.378                                                        | 2.599                          | 1315.91            | 3419.70            | 3.581                          | 1026.85            | 3676.94            |
| A_68_P31620307 | chr18:35990504-35990548                           | NM_133687:1055      | Cxcx5         | INSIDE                 | 1.378                                                        | 2.707                          | 1313.88            | 3556.03            | 3.729                          | 1077.64            | 4018.54            |
| A_68_P30678530 | chr16:37012233-37012277                           | NM_001159369:383    | Polq          | INSIDE                 | 1.378                                                        | 1.598                          | 710.95             | 1136.21            | 2.202                          | 600.92             | 1323.31            |
| A_68_P24994377 | chr7:20204860-20204904                            | NM_009046:9905      | Relb          | INSIDE                 | 1.378                                                        | 2.654                          | 2286.08            | 6067.75            | 3.657                          | 1835.48            | 6713.10            |
| A_68_P27786170 | chr11:49838566-49838610                           | NM_021540:-244      | Rnf130        | PROMOTER               | 1.378                                                        | 1.429                          | 1226.49            | 1753.24            | 1.970                          | 1132.76            | 2231.12            |
| A_68_P31196997 | chr17:44873430-44873474                           | NM_001145920:145    | Rumx2         | INSIDE                 | 1.378                                                        | 2.438                          | 917.75             | 2237.63            | 3.360                          | 915.27             | 3074.90            |
| A_68_P28332011 | chr12:32244102-32244146                           | NM_011867:710       | Sle26a4       | INSIDE                 | 1.378                                                        | 5.869                          | 464.29             | 2724.78            | 8.089                          | 473.71             | 3831.95            |
| A_68_P28087051 | chr11:103634875-103634919                         | NM_009521:-592      | Wnt3          | PROMOTER               | 1.378                                                        | 2.144                          | 2186.97            | 4688.89            | 2.955                          | 1748.70            | 5167.87            |
| A_68_P28703312 | chr12:105685478-105685522                         |                     |               | Unknown                | 1.378                                                        | 4.544                          | 1247.37            | 5668.27            | 6.264                          | 1078.33            | 6754.76            |
| A_68_P31560300 | chr18:24625872-24625916                           | NM_026529:-3477     | 2700062C07Rik | PROMOTER               | 1.377                                                        | 2.091                          | 1837.99            | 3843.87            | 2.880                          | 1537.54            | 4428.68            |
| A_68_P20872226 | chr1:181733791-181733835                          | NM_026375:334       | Ahetf1        | INSIDE                 | 1.377                                                        | 1.483                          | 1020.63            | 1513.38            | 2.042                          | 953.61             | 1947.41            |
| A_68_P26641128 | chr9:74800966-74801010                            | NM_001113283:129    | BC031353      | INSIDE                 | 1.377                                                        | 1.421                          | 935.86             | 1330.00            | 1.957                          | 757.06             | 1481.86            |
| A_68_P26229677 | chr8:124431978-124432022                          | NM_001033485:268    | BC048644      | INSIDE                 | 1.377                                                        | 1.832                          | 3606.16            | 6605.22            | 2.522                          | 2702.89            | 6815.57            |
| A_68_P24993659 | chr7:20092410-20092454                            | NM_177692:1248      | Blocl1s3      | INSIDE                 | 1.377                                                        | 1.527                          | 817.62             | 1248.89            | 2.103                          | 736.93             | 1549.64            |
| A_68_P23415125 | chr4:151235092-151235136                          | NM_001081557:763    | Camta1        | INSIDE                 | 1.377                                                        | 1.933                          | 1640.21            | 3170.34            | 2.661                          | 1284.07            | 3416.84            |
| A_68_P28175792 | chr11:118951266-118951310                         | NM_007625:-3737     | Cbx4          | PROMOTER               | 1.377                                                        | 1.724                          | 1989.94            | 3429.86            | 2.373                          | 1495.37            | 3548.44            |
| A_68_P30347072 | chr15:76077510-76077554                           | NM_023168:296       | Grina         | INSIDE                 | 1.377                                                        | 1.644                          | 4149.13            | 6822.67            | 2.264                          | 3082.56            | 6979.74            |
| A_68_P25770373 | chr8:34842329-34842373                            | NM_001167921:-35    | Gtf2e2        | PROMOTER               | 1.377                                                        | 3.104                          | 596.25             | 1850.67            | 4.273                          | 555.40             | 2373.50            |
| A_68_P23300610 | chr4:129815848-129815892                          | NM_001163027:-75    | Hertr1        | PROMOTER               | 1.377                                                        | 3.703                          | 712.34             | 2637.77            | 5.099                          | 651.74             | 3323.44            |
| A_68_P21104807 | chr2:30567268-30567312                            | NR_037272:-9439     | Mir3089       | PROMOTER               | 1.377                                                        | 1.905                          | 1670.97            | 3182.87            | 2.623                          | 1314.14            | 3447.47            |
| A_68_P31110244 | chr17:26575843-26575887                           | NM_001081656:23955  | Neur11b       | INSIDE                 | 1.377                                                        | 2.750                          | 354.52             | 974.95             | 3.786                          | 392.75             | 1486.86            |
| A_68_P31992143 | chr19:18706329-18706373                           | NM_017375:-47       | Ostf1         | DIVERGENT_PROMOTER     | 1.377                                                        | 3.356                          | 665.77             | 2234.11            | 4.620                          | 579.61             | 2677.94            |
| A_68_P27310783 | chr10:85334508-85334552                           | NM_133993:-45       | Pwp1          | PROMOTER               | 1.377                                                        | 4.295                          | 2751.45            | 11818.80           | 5.915                          | 2115.68            | 12513.39           |
| A_68_P21370050 | chr2:79475696-79475740                            | NM_080558:137       | Ssfa2         | INSIDE                 | 1.377                                                        | 3.999                          | 1978.05            | 7909.62            | 5.507                          | 1706.95            | 9399.62            |
| A_68_P29647966 | chr14:61656769-61656813                           | NM_001164155:34     | Tnfrsf19      | INSIDE                 | 1.377                                                        | 1.838                          | 6260.09            | 11508.96           | 2.532                          | 4828.77            | 12228.67           |

| ProbeName      | Target position of probe on CpG island microarray | TargetID                 | GeneSymbol | CpG island Description | Ratio of relative methylation (TiO <sub>2</sub> -NP/Vehicle) | Sham group                     |                    |                    | TiO <sub>2</sub> -H group      |                    |                    |
|----------------|---------------------------------------------------|--------------------------|------------|------------------------|--------------------------------------------------------------|--------------------------------|--------------------|--------------------|--------------------------------|--------------------|--------------------|
|                |                                                   |                          |            |                        |                                                              | Relative methylation (Cy5/Cy3) | Cy3 signal (Input) | Cy5 signal (MeDIP) | Relative methylation (Cy5/Cy3) | Cy3 signal (Input) | Cy5 signal (MeDIP) |
| A_68_P22314483 | chr3:88357962-88358006                            | NM_033526:347            | Ubp1n4     | INSIDE                 | 1.377                                                        | 1.901                          | 4250.16            | 8080.01            | 2.618                          | 3593.31            | 9407.82            |
| A_68_P24302940 | chr6:24615184-24615228                            | NM_028459:-211           | Wasl       | PROMOTER               | 1.377                                                        | 3.177                          | 5056.14            | 16063.79           | 4.373                          | 3996.07            | 17476.81           |
| A_68_P24164949 | chr5:145992823-145992867                          | NM_028298:217            | Zfp655     | INSIDE                 | 1.377                                                        | 2.062                          | 389.23             | 802.68             | 2.839                          | 344.22             | 977.21             |
| A_68_P23434211 | chr4:154176443-154176487                          |                          | Unknown    | Unknown                | 1.377                                                        | 1.561                          | 543.93             | 849.12             | 2.149                          | 381.65             | 820.32             |
| A_68_P28430596 | chr12:52694381-52694425                           | NM_001198835:75          | Coch       | INSIDE                 | 1.376                                                        | 0.478                          | 1309.17            | 626.02             | 0.658                          | 1116.29            | 734.38             |
| A_68_P29699005 | chr14:70475525-70475569                           | NM_018781:-1705          | Egr3       | PROMOTER               | 1.376                                                        | 1.394                          | 1438.22            | 2004.90            | 1.918                          | 1157.31            | 2219.84            |
| A_68_P26319144 | chr9:14556142-14556186                            | NM_010242:402            | Fut4       | INSIDE                 | 1.376                                                        | 3.074                          | 1203.39            | 3699.80            | 4.231                          | 1121.20            | 4744.15            |
| A_68_P26084325 | chr8:98157711-98157755                            | NM_030198:274            | Gins3      | INSIDE                 | 1.376                                                        | 1.883                          | 985.87             | 1856.77            | 2.592                          | 859.02             | 2226.91            |
| A_68_P26228892 | chr8:124308825-124308869                          | NM_020605:54388          | Jph3       | INSIDE                 | 1.376                                                        | 1.724                          | 995.29             | 1715.95            | 2.372                          | 838.23             | 1988.43            |
| A_68_P25362045 | chr7:106617271-106617315                          | NM_028145:2779           | Klhl35     | INSIDE                 | 1.376                                                        | 2.305                          | 526.96             | 1214.56            | 3.171                          | 454.24             | 1440.49            |
| A_68_P23391245 | chr4:147278506-147278550                          | NM_133201:400            | Mfn2       | INSIDE                 | 1.376                                                        | 3.309                          | 1814.59            | 6004.03            | 4.552                          | 1323.36            | 6024.14            |
| A_68_P25261415 | chr7:86644791-86644835                            | NR_029818:-5337          | Mir9-3     | PROMOTER               | 1.376                                                        | 3.090                          | 1236.50            | 3820.81            | 4.251                          | 1120.30            | 4762.78            |
| A_68_P23567786 | chr5:29804560-29804604                            | NM_019944:428            | Mnx1       | INSIDE                 | 1.376                                                        | 2.546                          | 1206.43            | 3072.06            | 3.503                          | 1201.39            | 4208.33            |
| A_68_P29009458 | chr13:46822289-46822333                           | NM_175749:906            | Nup153     | INSIDE                 | 1.376                                                        | 1.969                          | 2573.51            | 5068.11            | 2.710                          | 1813.46            | 4914.81            |
| A_68_P20774854 | chr1:163899508-163899552                          | NM_001039045:212         | Pigc       | INSIDE                 | 1.376                                                        | 2.331                          | 1042.59            | 2430.21            | 3.208                          | 898.56             | 2882.98            |
| A_68_P30346606 | chr15:76010797-76010841                           | NM_201394:15322          | Plec       | INSIDE                 | 1.376                                                        | 2.047                          | 535.71             | 1096.39            | 2.815                          | 444.76             | 1252.19            |
| A_68_P30566363 | chr16:15638071-15638115                           | NM_011159:134            | Prkdc      | INSIDE                 | 1.376                                                        | 1.710                          | 1088.29            | 1861.23            | 2.354                          | 930.80             | 2190.88            |
| A_68_P29256277 | chr13:98976271-98976315                           | NM_012026:-172           | Rgnef      | PROMOTER               | 1.376                                                        | 3.274                          | 1412.57            | 4624.77            | 4.504                          | 1243.93            | 5602.44            |
| A_68_P23576986 | chr5:31495832-31495876                            | NM_153680:178            | Snx17      | INSIDE                 | 1.376                                                        | 1.840                          | 2165.65            | 3985.33            | 2.533                          | 1787.83            | 4528.59            |
| A_68_P27579022 | chr11:8524378-8524422                             | NM_001083587:40138       | Tns3       | INSIDE                 | 1.376                                                        | 1.548                          | 2177.26            | 3369.77            | 2.130                          | 1779.43            | 3789.85            |
| A_68_P28961200 | chr13:38619778-38619822                           | NM_145367:529            | Txndc5     | INSIDE                 | 1.376                                                        | 3.821                          | 5245.05            | 20040.92           | 5.259                          | 3912.62            | 20576.59           |
| A_68_P20833903 | chr1:174493113-174493157                          | NR_027644:3098           | Vsig8      | INSIDE                 | 1.376                                                        | 1.793                          | 2249.43            | 4033.83            | 2.468                          | 1999.11            | 4933.52            |
| A_68_P27646190 | chr11:23397665-23397709                           | NM_172391:260            | Ahsa2      | INSIDE                 | 1.375                                                        | 1.715                          | 1621.39            | 2781.47            | 2.359                          | 1351.90            | 3189.46            |
| A_68_P29514239 | chr14:32644087-32644131                           | NM_001024604:-507        | Ankrd28    | PROMOTER               | 1.375                                                        | 1.676                          | 1130.69            | 1895.08            | 2.304                          | 944.60             | 2176.30            |
| A_68_P32414052 | chrX:57657724-57657768                            | NM_001001798:-590        | Atp11c     | PROMOTER               | 1.375                                                        | 1.643                          | 538.41             | 884.38             | 2.259                          | 296.57             | 669.91             |
| A_68_P27933360 | chr11:76479988-76480032                           | NM_177182:-5961          | Bhlha9     | PROMOTER               | 1.375                                                        | 3.983                          | 364.29             | 1450.84            | 5.478                          | 383.99             | 2103.54            |
| A_68_P21768605 | chr2:155782745-155782804                          | NM_001129999:481         | Cep250     | INSIDE                 | 1.375                                                        | 5.441                          | 118.40             | 644.25             | 7.479                          | 128.96             | 964.52             |
| A_68_P26880500 | chr9:120842272-120842316                          | NM_007614:-223           | Cttnb1     | PROMOTER               | 1.375                                                        | 2.419                          | 2400.00            | 5804.42            | 3.326                          | 2000.36            | 6653.02            |
| A_68_P22152359 | chr3:55046645-55046689                            | NM_001111053:219         | Delk1      | INSIDE                 | 1.375                                                        | 3.624                          | 8361.76            | 30303.38           | 4.984                          | 6503.71            | 32416.85           |
| A_68_P20137271 | chr1:34234808-34234852                            | NM_133833:166161         | Dst        | INSIDE                 | 1.375                                                        | 3.461                          | 716.17             | 2478.51            | 4.760                          | 596.28             | 2838.31            |
| A_68_P28493839 | chr12:66176820-66176864                           | NM_178912:250            | Fanem      | INSIDE                 | 1.375                                                        | 2.779                          | 3973.93            | 11044.06           | 3.820                          | 3275.45            | 12511.94           |
| A_68_P25965606 | chr8:75876811-75876855                            | NM_010687:-377           | Large      | PROMOTER               | 1.375                                                        | 2.625                          | 2341.04            | 6144.85            | 3.610                          | 1995.36            | 7202.71            |
| A_68_P30425292 | chr15:89288332-89288376                           | NM_021921:4013           | Mapk8ip2   | INSIDE                 | 1.375                                                        | 3.266                          | 229.60             | 749.97             | 4.492                          | 227.71             | 1022.91            |
| A_68_P28269969 | chr12:17355438-17355482                           | NR_037226:-6737          | Mir3066    | PROMOTER               | 1.375                                                        | 2.091                          | 685.61             | 1433.87            | 2.876                          | 587.58             | 1689.64            |
| A_68_P26904675 | chr10:4424482-4424526                             | NM_001161822:364         | Rgs17      | INSIDE                 | 1.375                                                        | 1.732                          | 1542.84            | 2671.65            | 2.381                          | 1583.48            | 3770.68            |
| A_68_P31598790 | chr18:31769072-31769116                           | NM_026165:462            | Sle25a46   | INSIDE                 | 1.375                                                        | 6.570                          | 998.35             | 6559.36            | 9.031                          | 852.54             | 7699.27            |
| A_68_P32260673 | chrX:11717563-11717607                            | NM_001168321:19897       | Bcor       | INSIDE                 | 1.374                                                        | 2.878                          | 826.98             | 2380.40            | 3.955                          | 499.68             | 1976.01            |
| A_68_P23927393 | chr5:100468878-100468922                          | NM_001163035:-112        | Enoph1     | DIVERGENT_PROMOTER     | 1.374                                                        | 1.509                          | 1248.13            | 1882.91            | 2.073                          | 955.75             | 1981.28            |
| A_68_P24143544 | chr5:141306207-141306251                          | NM_010302:157            | Gna12      | INSIDE                 | 1.374                                                        | 3.560                          | 907.44             | 3230.87            | 4.890                          | 814.68             | 3984.00            |
| A_68_P30350023 | chr15:76528479-76528523                           | NM_182805:1307           | Gpt        | INSIDE                 | 1.374                                                        | 1.770                          | 971.90             | 1720.43            | 2.432                          | 862.92             | 2098.74            |
| A_68_P21794482 | chr2:160191240-160191284                          | NM_010658:1539           | Ma1b       | INSIDE                 | 1.374                                                        | 1.503                          | 3066.50            | 4609.26            | 2.065                          | 2286.40            | 4721.48            |
| A_68_P32579358 | chrX:102316971-102317015                          | NM_053201:1258           | Magee1     | INSIDE                 | 1.374                                                        | 2.382                          | 719.09             | 1712.51            | 3.272                          | 498.39             | 1630.53            |
| A_68_P23006652 | chr4:70195652-70195696                            | NM_172694:288            | Megf9      | INSIDE                 | 1.374                                                        | 2.072                          | 963.32             | 1996.32            | 2.847                          | 830.41             | 2363.84            |
| A_68_P21132204 | chr2:35056598-35056642                            | NM_026697:20             | Rab14      | INSIDE                 | 1.374                                                        | 1.586                          | 6464.98            | 10254.22           | 2.179                          | 5245.70            | 11430.34           |
| A_68_P25092756 | chr7:52632188-52632232                            | NM_009224:18807          | Snmp70     | INSIDE                 | 1.374                                                        | 3.300                          | 2001.33            | 6604.55            | 4.534                          | 1404.80            | 6368.80            |
| A_68_P32565202 | chrX:98892756-98892800                            | ENSMUST00000073812:-5589 |            | PROMOTER               | 1.374                                                        | 6.762                          | 4957.84            | 33525.38           | 9.293                          | 2152.12            | 19999.37           |
| A_68_P22069325 | chr3:38355009-38355053                            | NM_001167883:28708       | Ankrd50    | INSIDE                 | 1.373                                                        | 1.625                          | 837.43             | 1360.69            | 2.231                          | 684.92             | 1527.92            |
| A_68_P28050583 | chr11:97301455-97301499                           | NM_021493:-9997          | Arhgap23   | PROMOTER               | 1.373                                                        | 2.380                          | 1152.01            | 2741.29            | 3.267                          | 924.38             | 3019.91            |
| A_68_P22311221 | chr3:87801100-87801144                            | NM_007529:3156           | Bcan       | INSIDE                 | 1.373                                                        | 2.311                          | 651.53             | 1505.78            | 3.174                          | 611.78             | 1941.94            |
| A_68_P20350875 | chr1:74901471-74901515                            | NM_009872:-110           | Cdk5r2     | PROMOTER               | 1.373                                                        | 1.914                          | 784.58             | 1501.78            | 2.628                          | 687.29             | 1806.35            |
| A_68_P26526112 | chr9:54349310-54349354                            | NM_172771:101            | Dmxi2      | INSIDE                 | 1.373                                                        | 2.680                          | 1768.03            | 4738.66            | 3.680                          | 1451.46            | 5341.14            |

| ProbeName      | Target position of probe on CpG island microarray | TargetID                | GeneSymbol    | CpG island Description | Ratio of relative methylation (TiO <sub>2</sub> -NP/Vehicle) | Sham group                     |                    |                    | TiO <sub>2</sub> -H group      |                    |                    |
|----------------|---------------------------------------------------|-------------------------|---------------|------------------------|--------------------------------------------------------------|--------------------------------|--------------------|--------------------|--------------------------------|--------------------|--------------------|
|                |                                                   |                         |               |                        |                                                              | Relative methylation (Cy5/Cy3) | Cy3 signal (Input) | Cy5 signal (MeDIP) | Relative methylation (Cy5/Cy3) | Cy3 signal (Input) | Cy5 signal (MeDIP) |
| A_68_P31122729 | chr17:28622707-28622751                           | NM_010220:329           | Fkbp5         | INSIDE                 | 1.373                                                        | 1.817                          | 636.24             | 1155.99            | 2.495                          | 613.11             | 1529.42            |
| A_68_P30960667 | chr16:91044987-91045031                           | NM_026110:-384          | Gefc1         | PROMOTER               | 1.373                                                        | 2.734                          | 1560.00            | 4264.53            | 3.753                          | 1215.01            | 4560.42            |
| A_68_P32539367 | chrX:91787344-91787392                            | NM_019791:45            | Maged1        | INSIDE                 | 1.373                                                        | 2.267                          | 4377.50            | 9923.92            | 3.112                          | 1911.15            | 5948.14            |
| A_68_P31425842 | chr17:88374222-88374266                           | NM_010830:-145          | Msh6          | PROMOTER               | 1.373                                                        | 1.615                          | 1220.04            | 1969.95            | 2.217                          | 1081.66            | 2397.57            |
| A_68_P30000047 | chr15:8394313-8394357                             | NM_027707:129           | Nipbl         | INSIDE                 | 1.373                                                        | 2.319                          | 673.55             | 1561.95            | 3.183                          | 505.75             | 1609.85            |
| A_68_P31622624 | chr18:36356271-36356315                           | NM_001167891:522        | Nrg2          | INSIDE                 | 1.373                                                        | 3.532                          | 1864.27            | 6583.97            | 4.848                          | 1729.99            | 8387.74            |
| A_68_P31934660 | chr19:6428244-6428288                             | NM_001205234:9529       | Nrxn2         | INSIDE                 | 1.373                                                        | 4.464                          | 641.73             | 2864.66            | 6.130                          | 517.31             | 3171.36            |
| A_68_P24043140 | chr5:121641038-121641082                          | NM_001109992:346        | Ptpn11        | INSIDE                 | 1.373                                                        | 2.484                          | 994.92             | 2471.65            | 3.410                          | 895.24             | 3052.50            |
| A_68_P30477114 | chr15:98711909-98711953                           | NM_026967:-85           | Rheb11        | PROMOTER               | 1.373                                                        | 1.647                          | 627.51             | 1033.80            | 2.262                          | 510.71             | 1155.47            |
| A_68_P23896973 | chr5:93371964-93372008                            | NM_001077596:44963      | Shroom3       | INSIDE                 | 1.373                                                        | 3.531                          | 278.13             | 982.12             | 4.847                          | 237.92             | 1153.27            |
| A_68_P30778635 | chr16:55974040-55974084                           | NM_173026:146           | Zbtb11        | INSIDE                 | 1.373                                                        | 2.188                          | 485.07             | 1061.14            | 3.003                          | 449.64             | 1350.30            |
| A_68_P20625950 | chr1:135061005-135061049                          |                         |               | Unknown                | 1.373                                                        | 2.926                          | 2328.63            | 6813.40            | 4.016                          | 1832.13            | 7357.84            |
| A_68_P23573892 | chr5:30969470-30969514                            | NM_007681:218           | Cenpa         | INSIDE                 | 1.372                                                        | 2.370                          | 2278.59            | 5401.33            | 3.253                          | 1830.57            | 5955.37            |
| A_68_P31992642 | chr19:18787440-18787484                           | NM_177640:-263          | D030056L22Rik | PROMOTER               | 1.372                                                        | 2.103                          | 1545.40            | 3249.62            | 2.885                          | 1352.69            | 3903.16            |
| A_68_P26659816 | chr9:78329333-78329377                            | NM_010106:177           | Eef1a1        | INSIDE                 | 1.372                                                        | 1.469                          | 695.01             | 1021.26            | 2.016                          | 626.18             | 1262.24            |
| A_68_P23280299 | chr4:126146120-126146166                          | NM_153403:-477          | Eif2e1        | PROMOTER               | 1.372                                                        | 1.714                          | 1628.50            | 2791.35            | 2.352                          | 1222.62            | 2875.57            |
| A_68_P25016727 | chr7:28116145-28116189                            | NM_001113549:2501       | Ltbp4         | INSIDE                 | 1.372                                                        | 4.066                          | 1296.28            | 5270.71            | 5.579                          | 991.80             | 5533.22            |
| A_68_P21081858 | chr2:26883547-26883591                            | NM_172659:-50           | Sle2a6        | PROMOTER               | 1.372                                                        | 1.937                          | 521.29             | 1009.54            | 2.658                          | 391.90             | 1041.65            |
| A_68_P20121785 | chr1:30930713-30930757                            | ENSMUST00000046443:-195 |               | PROMOTER               | 1.372                                                        | 9.708                          | 671.62             | 6520.36            | 13.321                         | 660.88             | 8803.74            |
| A_68_P27675038 | chr11:29447584-29447633                           | NM_001163521:-341       | 1700034F02Rik | PROMOTER               | 1.371                                                        | 1.827                          | 1378.55            | 2518.92            | 2.505                          | 1090.59            | 2731.52            |
| A_68_P20743645 | chr1:158488645-158488689                          | NM_001136104:-251       | Abl2          | PROMOTER               | 1.371                                                        | 1.999                          | 940.19             | 1879.19            | 2.739                          | 830.12             | 2274.10            |
| A_68_P27868560 | chr11:64792596-64792640                           | NM_023479:82            | Elac2         | INSIDE                 | 1.371                                                        | 1.715                          | 2034.10            | 3487.49            | 2.351                          | 1612.28            | 3790.58            |
| A_68_P22892661 | chr4:47105201-47105245                            | NM_172693:398           | Galnt12       | INSIDE                 | 1.371                                                        | 2.988                          | 5173.15            | 15456.04           | 4.097                          | 3825.02            | 15672.85           |
| A_68_P31253728 | chr17:56219108-56219152                           | NM_008233:51            | Hdgfrp2       | INSIDE                 | 1.371                                                        | 1.367                          | 2289.37            | 3129.31            | 1.873                          | 1816.94            | 3404.02            |
| A_68_P26658189 | chr9:77960962-77961006                            | NM_019987:-60           | Ick           | PROMOTER               | 1.371                                                        | 2.883                          | 1000.73            | 2884.64            | 3.952                          | 895.54             | 3539.20            |
| A_68_P25088776 | chr7:51926206-51926250                            | NM_028021:-5355         | Myh14         | PROMOTER               | 1.371                                                        | 7.363                          | 1447.93            | 10661.22           | 10.097                         | 1179.84            | 11912.56           |
| A_68_P25179906 | chr7:72017792-72017836                            | NM_023239:112           | Ndn12         | INSIDE                 | 1.371                                                        | 2.516                          | 572.71             | 1440.90            | 3.449                          | 502.13             | 1732.03            |
| A_68_P27273029 | chr10:77707518-77707562                           | NM_001081055:-153       | Trappc10      | PROMOTER               | 1.371                                                        | 2.506                          | 572.85             | 1435.32            | 3.434                          | 519.86             | 1785.44            |
| A_68_P27099070 | chr10:42894837-42894881                           | NM_172419:349           | 9030612E09Rik | INSIDE                 | 1.370                                                        | 1.604                          | 1165.63            | 1870.02            | 2.199                          | 908.73             | 1997.96            |
| A_68_P24040428 | chr5:121161477-121161521                          | NM_008052:180           | Dtx1          | INSIDE                 | 1.370                                                        | 1.414                          | 2522.17            | 3567.04            | 1.937                          | 1907.99            | 3696.06            |
| A_68_P25954902 | chr8:73438710-73438754                            | NM_173013:8860          | Mtap1s        | INSIDE                 | 1.370                                                        | 2.956                          | 1750.82            | 5175.23            | 4.049                          | 1434.24            | 5806.80            |
| A_68_P32289246 | chrX:20195326-20195370                            | NM_001167776:464        | Rbm10         | INSIDE                 | 1.370                                                        | 2.689                          | 312.43             | 840.02             | 3.684                          | 216.81             | 798.64             |
| A_68_P28599771 | chr12:86039461-86039505                           | NM_001033334:275        | Tmem90a       | INSIDE                 | 1.370                                                        | 1.496                          | 1077.57            | 1611.93            | 2.049                          | 954.20             | 1955.36            |
| A_68_P30133050 | chr15:35301092-35301136                           | NM_177151:-186          | Vps13b        | PROMOTER               | 1.370                                                        | 1.559                          | 605.88             | 944.33             | 2.136                          | 405.16             | 865.25             |
| A_68_P24114683 | chr5:135565547-135565591                          |                         |               | Unknown                | 1.370                                                        | 6.231                          | 5435.73            | 33867.69           | 8.538                          | 4289.37            | 36622.50           |
| A_68_P22283292 | chr3:82932341-82932385                            | ENSMUST00000047876:806  |               | INSIDE                 | 1.370                                                        | 1.540                          | 1362.03            | 2097.64            | 2.110                          | 1337.53            | 2822.76            |
| A_68_P23151254 | chr4:100449214-100449258                          | NM_198037:-47           | Cachd1        | PROMOTER               | 1.369                                                        | 1.924                          | 484.95             | 932.84             | 2.632                          | 426.95             | 1123.94            |
| A_68_P33007797 | chr4_random:129202-129246                         | NM_001033326:19423      | Dhrsx         | INSIDE                 | 1.369                                                        | 3.132                          | 1160.60            | 3634.66            | 4.289                          | 966.03             | 4143.07            |
| A_68_P21704238 | chr2:143741481-143741525                          | NM_019771:436           | Dstn          | INSIDE                 | 1.369                                                        | 2.307                          | 1017.02            | 2346.25            | 3.158                          | 850.15             | 2685.09            |
| A_68_P27945140 | chr11:78565152-78565196                           | NM_197989:57            | Fam58b        | INSIDE                 | 1.369                                                        | 2.862                          | 900.85             | 2578.09            | 3.918                          | 754.39             | 2955.42            |
| A_68_P21562932 | chr2:118082494-118082538                          | NM_027759:186           | Fsip1         | INSIDE                 | 1.369                                                        | 1.651                          | 5276.17            | 8710.22            | 2.261                          | 4159.80            | 9404.29            |
| A_68_P28883194 | chr13:23830758-23830802                           | NM_015786:105           | Hist1h1c      | INSIDE                 | 1.369                                                        | 2.192                          | 380.66             | 834.42             | 3.002                          | 334.35             | 1003.65            |
| A_68_P28161571 | chr11:116704550-116704594                         | NM_033398:191           | Jmjd6         | INSIDE                 | 1.369                                                        | 1.664                          | 2018.24            | 3357.39            | 2.278                          | 1617.83            | 3685.48            |
| A_68_P21122750 | chr2:33495287-33495331                            | NM_010725:723           | Lmx1b         | INSIDE                 | 1.369                                                        | 2.211                          | 1750.94            | 3871.10            | 3.027                          | 1471.58            | 4454.33            |
| A_68_P25587306 | chr7:148380913-148380957                          | NM_153777:-107          | Lrre56        | PROMOTER               | 1.369                                                        | 4.543                          | 360.12             | 1636.08            | 6.221                          | 318.47             | 1981.20            |
| A_68_P32777673 | chrX:156426105-156426149                          | NM_001163085:-238       | Map3k15       | PROMOTER               | 1.369                                                        | 2.374                          | 360.63             | 856.04             | 3.249                          | 289.33             | 939.97             |
| A_68_P20015303 | chr1:7078680-7078724                              | NM_183028:-298          | Pcmtd1        | PROMOTER               | 1.369                                                        | 3.266                          | 2213.15            | 7228.65            | 4.471                          | 1704.15            | 7618.55            |
| A_68_P24344497 | chr6:32538021-32538065                            | NM_175750:150           | Plkna4        | INSIDE                 | 1.369                                                        | 2.431                          | 405.17             | 984.91             | 3.327                          | 335.28             | 1115.48            |
| A_68_P28738219 | chr12:111685115-111685159                         | NM_001135001:-252       | Ppp2r5c       | PROMOTER               | 1.369                                                        | 2.398                          | 1728.54            | 4145.07            | 3.284                          | 1481.02            | 4863.54            |
| A_68_P27109370 | chr10:44787342-44787386                           | NM_011156:345           | Prep          | INSIDE                 | 1.369                                                        | 2.529                          | 859.35             | 2173.64            | 3.462                          | 777.81             | 2692.76            |
| A_68_P28301681 | chr12:27100085-27100129                           | NM_001081977:15         | Rnf144a       | INSIDE                 | 1.369                                                        | 4.189                          | 2490.92            | 10434.65           | 5.736                          | 1991.84            | 11425.37           |

| ProbeName      | Target position of probe on CpG island microarray | TargetID                | GeneSymbol    | CpG island Description | Ratio of relative methylation (TiO <sub>2</sub> -NP/Vehicle) | Sham group                     |                    |                    | TiO <sub>2</sub> -H group      |                    |                    |
|----------------|---------------------------------------------------|-------------------------|---------------|------------------------|--------------------------------------------------------------|--------------------------------|--------------------|--------------------|--------------------------------|--------------------|--------------------|
|                |                                                   |                         |               |                        |                                                              | Relative methylation (Cy5/Cy3) | Cy3 signal (Input) | Cy5 signal (MeDIP) | Relative methylation (Cy5/Cy3) | Cy3 signal (Input) | Cy5 signal (MeDIP) |
| A_68_P23434595 | chr4:154229865-154229909                          | NM_172878:422           | Ttc34         | PROMOTER               | 1.369                                                        | 1.886                          | 364.52             | 687.62             | 2.581                          | 350.58             | 905.03             |
| A_68_P21105116 | chr2:30627229-30627273                            |                         |               | Unknown                | 1.369                                                        | 3.274                          | 1242.96            | 4069.44            | 4.482                          | 1097.87            | 4920.44            |
| A_68_P31467175 | chr18:5163131-5163175                             | ENSMUST00000150337:2577 |               | INSIDE                 | 1.369                                                        | 1.758                          | 2368.93            | 4165.65            | 2.408                          | 1900.57            | 4576.71            |
| A_68_P27971504 | chr11:83254254-83254300                           | NM_025492:3081          | 1700020L24Rik | INSIDE                 | 1.368                                                        | 2.805                          | 780.50             | 2189.34            | 3.839                          | 560.42             | 2151.21            |
| A_68_P22892545 | chr4:47069865-47069909                            | NM_001024136:292        | Anks6         | INSIDE                 | 1.368                                                        | 1.768                          | 448.56             | 792.95             | 2.419                          | 413.33             | 999.74             |
| A_68_P26169913 | chr8:114256102-114256146                          | NM_001198839:88         | Bear1         | PROMOTER               | 1.368                                                        | 1.606                          | 1267.97            | 2036.39            | 2.196                          | 1083.80            | 2380.48            |
| A_68_P21338757 | chr2:74520450-74520494                            | NM_008273:23            | Hoxd11        | INSIDE                 | 1.368                                                        | 1.926                          | 1431.74            | 2757.97            | 2.636                          | 1127.49            | 2972.01            |
| A_68_P21137837 | chr2:35960605-35960649                            | NM_001083126:-1046      | Lhx6          | PROMOTER               | 1.368                                                        | 1.750                          | 2410.01            | 4216.87            | 2.393                          | 2224.30            | 5322.58            |
| A_68_P26759567 | chr9:98501957-98502001                            | NM_025485:120           | Mrps22        | INSIDE                 | 1.368                                                        | 3.823                          | 1312.87            | 5019.01            | 5.230                          | 1138.42            | 5953.87            |
| A_68_P30670430 | chr16:35490785-35490829                           | NM_028295:153           | Pdia5         | INSIDE                 | 1.368                                                        | 2.441                          | 13750.31           | 33567.02           | 3.339                          | 10387.86           | 34680.90           |
| A_68_P30655993 | chr16:33056579-33056624                           | NM_021338:2             | Rpl35a        | INSIDE                 | 1.368                                                        | 2.063                          | 1663.09            | 3431.42            | 2.822                          | 1331.72            | 3758.29            |
| A_68_P32396717 | chrX:53863261-53863305                            | NM_172780:271           | Sle9a6        | INSIDE                 | 1.368                                                        | 1.889                          | 2597.25            | 4907.16            | 2.584                          | 1089.97            | 2816.44            |
| A_68_P26845378 | chr9:114472828-114472872                          | NM_001042503:637        | Trim71        | INSIDE                 | 1.368                                                        | 1.578                          | 472.26             | 745.14             | 2.158                          | 428.19             | 924.04             |
| A_68_P24835542 | chr6:127837749-127837793                          | NM_026743:131           | Tspan11       | INSIDE                 | 1.368                                                        | 1.988                          | 2799.60            | 5564.83            | 2.719                          | 2337.58            | 6355.58            |
| A_68_P25005689 | chr7:25378891-25378935                            | NM_001033205:-6252      | Zfp575        | PROMOTER               | 1.368                                                        | 6.844                          | 2705.24            | 18515.49           | 9.360                          | 2044.84            | 19140.21           |
| A_68_P21865360 | chr2:172553949-172553993                          |                         |               | Unknown                | 1.368                                                        | 1.612                          | 1090.82            | 1757.87            | 2.204                          | 925.20             | 2039.16            |
| A_68_P32977628 | A_68_P32977628                                    |                         |               | Unknown                | 1.368                                                        | 2.466                          | 2769.34            | 6828.19            | 3.373                          | 1619.11            | 5461.68            |
| A_68_P31292459 | chr17:64213804-64213848                           | ENSMUST00000112829:463  |               | INSIDE                 | 1.368                                                        | 1.558                          | 2470.65            | 3849.48            | 2.132                          | 2091.44            | 4458.68            |
| A_68_P28706883 | chr12:106247987-106248031                         | NM_172500:11            | 4831426I19Rik | INSIDE                 | 1.367                                                        | 1.677                          | 950.15             | 1593.03            | 2.292                          | 785.95             | 1801.11            |
| A_68_P30542888 | chr16:10545617-10545661                           | NM_001204229:207        | Clec16a       | INSIDE                 | 1.367                                                        | 1.675                          | 1662.27            | 2784.25            | 2.290                          | 1314.90            | 3011.56            |
| A_68_P25532700 | chr7:139346324-139346368                          | NM_018867:78            | Cpxm2         | INSIDE                 | 1.367                                                        | 4.021                          | 2274.54            | 9147.03            | 5.496                          | 1804.75            | 9918.85            |
| A_68_P23349533 | chr4:138631065-138631109                          | NM_021358:-382          | Htr6          | PROMOTER               | 1.367                                                        | 3.012                          | 3354.55            | 10105.39           | 4.117                          | 2563.39            | 10554.44           |
| A_68_P29009466 | chr13:46823130-46823174                           | NM_175749:66            | Nup153        | INSIDE                 | 1.367                                                        | 1.694                          | 1586.03            | 2687.08            | 2.316                          | 1294.00            | 2996.38            |
| A_68_P31629950 | chr18:37927496-37927540                           | NM_033595:2285          | Pedhga12      | INSIDE                 | 1.367                                                        | 2.105                          | 393.75             | 828.98             | 2.879                          | 371.08             | 1068.22            |
| A_68_P32240903 | chrX:7500233-7500277                              | NM_013892:3307          | Pesk1n        | INSIDE                 | 1.367                                                        | 3.291                          | 1079.03            | 3550.77            | 4.497                          | 639.10             | 2874.21            |
| A_68_P24117609 | chr5:136209766-136209810                          | NM_008898:44705         | Por           | INSIDE                 | 1.367                                                        | 2.931                          | 887.84             | 2602.55            | 4.006                          | 739.59             | 2962.73            |
| A_68_P32462208 | chrX:70599329-70599373                            | NM_001160229:11391      | Zfp275        | INSIDE                 | 1.367                                                        | 3.264                          | 322.68             | 1053.14            | 4.461                          | 179.68             | 801.62             |
| A_68_P32145408 | chr19:46764549-46764593                           | NM_025563:175           | 2010012O05Rik | INSIDE                 | 1.366                                                        | 4.452                          | 1229.58            | 5474.42            | 6.081                          | 1084.00            | 6591.45            |
| A_68_P27565303 | chr11:5762324-5762369                             | NM_009636:478           | Aebp1         | INSIDE                 | 1.366                                                        | 2.865                          | 2978.57            | 8532.66            | 3.913                          | 2426.65            | 9494.28            |
| A_68_P27899584 | chr11:70042574-70042618                           | NM_007528:704           | Bcl6b         | INSIDE                 | 1.366                                                        | 2.798                          | 708.68             | 1983.09            | 3.823                          | 594.48             | 2272.99            |
| A_68_P20645802 | chr1:138311830-138311874                          | NM_026500:5             | Ddx59         | INSIDE                 | 1.366                                                        | 2.654                          | 593.77             | 1575.57            | 3.624                          | 505.83             | 1833.18            |
| A_68_P27542236 | chr10:128027435-128027479                         | NM_010153:-899          | Erbp3         | PROMOTER               | 1.366                                                        | 2.487                          | 615.00             | 1529.48            | 3.397                          | 550.29             | 1869.55            |
| A_68_P21374844 | chr2:80287643-80287687                            | NM_011356:-111          | Frzb          | PROMOTER               | 1.366                                                        | 2.653                          | 278.41             | 738.54             | 3.624                          | 232.57             | 842.79             |
| A_68_P20122141 | chr1:31006006-31006050                            | NR_002688:527           | Gm13363       | INSIDE                 | 1.366                                                        | 3.458                          | 957.64             | 3311.41            | 4.722                          | 802.74             | 3790.64            |
| A_68_P21489524 | chr2:104333565-104333609                          | NM_001145824:1060       | Hipk3         | INSIDE                 | 1.366                                                        | 2.527                          | 4985.82            | 12597.99           | 3.450                          | 4054.64            | 13990.46           |
| A_68_P25652450 | chr8:11008619-11008663                            | NM_001081212:-210       | Irs2          | PROMOTER               | 1.366                                                        | 3.243                          | 1037.10            | 3363.20            | 4.431                          | 913.30             | 4046.50            |
| A_68_P30491676 | chr15:101242719-101242763                         | NM_033073:-93           | Krt7          | PROMOTER               | 1.366                                                        | 2.265                          | 2270.88            | 5144.58            | 3.096                          | 1817.82            | 5627.44            |
| A_68_P24656008 | chr6:94234014-94234058                            | NM_001029850:-138       | Magi1         | PROMOTER               | 1.366                                                        | 2.915                          | 3017.70            | 8797.05            | 3.983                          | 2358.96            | 9395.79            |
| A_68_P21071913 | chr2:25258906-25258950                            | NM_008721:326           | Npdc1         | INSIDE                 | 1.366                                                        | 4.097                          | 2136.86            | 8754.80            | 5.597                          | 1746.94            | 9778.14            |
| A_68_P26542458 | chr9:57408773-57408817                            | NM_022813:44            | Scamp2        | INSIDE                 | 1.366                                                        | 2.322                          | 1662.49            | 3859.71            | 3.171                          | 1201.75            | 3811.15            |
| A_68_P27098031 | chr10:42741435-42741479                           | NM_175407:152880        | Sobp          | INSIDE                 | 1.366                                                        | 2.616                          | 436.98             | 1143.02            | 3.574                          | 364.82             | 1303.85            |
| A_68_P27937053 | chr11:77161754-77161798                           | NM_177710:131850        | Ssh2          | INSIDE                 | 1.366                                                        | 1.996                          | 388.31             | 774.94             | 2.726                          | 401.06             | 1093.45            |
| A_68_P28087325 | chr11:103671166-103671210                         | NM_009521:35700         | Wnt3          | INSIDE                 | 1.366                                                        | 2.438                          | 1160.65            | 2829.73            | 3.331                          | 1066.06            | 3551.03            |
| A_68_P31509674 | chr18:14130093-14130137                           | NM_145492:1128          | Zfp521        | INSIDE                 | 1.366                                                        | 2.488                          | 711.15             | 1769.61            | 3.399                          | 569.89             | 1936.82            |
| A_68_P26710067 | A_68_P26710067                                    |                         |               | Unknown                | 1.366                                                        | 2.734                          | 9332.13            | 25516.35           | 3.736                          | 6010.72            | 22454.09           |
| A_68_P27892803 | chr11:68873789-68873833                           | NM_028005:534           | 2310047M10Rik | INSIDE                 | 1.365                                                        | 1.753                          | 1835.32            | 3217.20            | 2.392                          | 1543.35            | 3691.98            |
| A_68_P30686068 | chr16:38452791-38452835                           | NM_007414:-43           | Adprh         | DIVERGENT_PROMOTER     | 1.365                                                        | 1.811                          | 429.23             | 777.53             | 2.473                          | 423.67             | 1047.63            |
| A_68_P23961351 | chr5:106886587-106886631                          | NM_001005477:577        | Barhl2        | INSIDE                 | 1.365                                                        | 5.453                          | 6035.95            | 32914.14           | 7.443                          | 4374.52            | 32552.81           |
| A_68_P29487113 | chr14:28242620-28242665                           | NM_001114879:610        | D14Abbl e     | INSIDE                 | 1.365                                                        | 2.278                          | 937.43             | 2135.62            | 3.111                          | 760.25             | 2365.00            |
| A_68_P29699027 | chr14:70478576-70478620                           | NM_018781:1347          | Egr3          | INSIDE                 | 1.365                                                        | 2.225                          | 2968.91            | 6606.06            | 3.036                          | 1916.90            | 5820.15            |
| A_68_P22882726 | chr4:45421447-45421491                            | NM_001009949:170        | Mcart1        | INSIDE                 | 1.365                                                        | 1.978                          | 1515.41            | 2998.06            | 2.701                          | 1358.02            | 3667.33            |



| ProbeName      | Target position of probe on CpG island microarray | TargetID           | GeneSymbol    | CpG island Description | Ratio of relative methylation (TiO <sub>2</sub> -NP/Vehicle) | Sham group                     |                    |                    | TiO <sub>2</sub> -H group      |                    |                    |
|----------------|---------------------------------------------------|--------------------|---------------|------------------------|--------------------------------------------------------------|--------------------------------|--------------------|--------------------|--------------------------------|--------------------|--------------------|
|                |                                                   |                    |               |                        |                                                              | Relative methylation (Cy5/Cy3) | Cy3 signal (Input) | Cy5 signal (MeDIP) | Relative methylation (Cy5/Cy3) | Cy3 signal (Input) | Cy5 signal (MeDIP) |
| A_68_P30884142 | chr16:76372860-76372904                           | NM_173440:412      | Nrip1         | INSIDE                 | 1.365                                                        | 1.630                          | 829.32             | 1351.42            | 2.224                          | 791.79             | 1761.14            |
| A_68_P21495967 | chr2:105516620-105516664                          | NM_013627:41       | Pax6          | INSIDE                 | 1.365                                                        | 1.404                          | 1409.12            | 1978.78            | 1.917                          | 1251.03            | 2398.75            |
| A_68_P27940746 | chr11:77796693-77796737                           | NM_174852:397      | Phf12         | INSIDE                 | 1.365                                                        | 1.576                          | 896.82             | 1412.96            | 2.150                          | 747.20             | 1606.34            |
| A_68_P29482222 | chr14:27353534-27353578                           | NM_032008:-330     | Slmap         | PROMOTER               | 1.365                                                        | 3.503                          | 1597.70            | 5596.47            | 4.781                          | 1401.51            | 6700.50            |
| A_68_P26696151 | chr9:85737666-85737710                            | NM_001164792:1230  | Tpbp          | INSIDE                 | 1.365                                                        | 1.601                          | 1639.80            | 2625.68            | 2.186                          | 1476.94            | 3228.44            |
| A_68_P31090924 | chr17:23013653-23013697                           | NM_001110254:-9573 | Zfp945        | PROMOTER               | 1.365                                                        | 3.268                          | 2013.01            | 6578.76            | 4.460                          | 1739.67            | 7759.32            |
| A_68_P29308200 | chr13:108680217-108680261                         | NM_145456:20       | Zswim6        | INSIDE                 | 1.365                                                        | 3.452                          | 1029.65            | 3554.78            | 4.711                          | 912.24             | 4297.77            |
| A_68_P22217922 | chr3:68674470-68674514                            | NM_001167996:985   | 1110032F04Rik | INSIDE                 | 1.364                                                        | 1.514                          | 3760.24            | 5692.53            | 2.065                          | 2765.18            | 5709.65            |
| A_68_P30339175 | chr15:74551980-74552024                           | NM_198607:339      | 4930572J05Rik | INSIDE                 | 1.364                                                        | 4.736                          | 981.45             | 4647.90            | 6.460                          | 773.94             | 5000.06            |
| A_68_P27938078 | chr11:77329061-77329105                           | NM_026185:464      | Abhd15        | INSIDE                 | 1.364                                                        | 1.489                          | 948.03             | 1411.60            | 2.031                          | 734.04             | 1491.14            |
| A_68_P28175760 | chr11:118947373-118947417                         | NM_007625:157      | Cbx4          | INSIDE                 | 1.364                                                        | 1.991                          | 1552.36            | 3091.16            | 2.715                          | 1329.48            | 3609.96            |
| A_68_P24980083 | chr7:16760918-16760963                            | NM_008627:212      | Meis3         | INSIDE                 | 1.364                                                        | 1.724                          | 1918.07            | 3306.37            | 2.352                          | 1537.74            | 3616.61            |
| A_68_P20005799 | chr1:4482580-4482624                              | NM_011441:3892     | Sox17         | INSIDE                 | 1.364                                                        | 2.873                          | 1902.00            | 5463.89            | 3.918                          | 1576.06            | 6174.50            |
| A_68_P31201703 | chr17:45682394-45682438                           | NM_001013749:4210  | Tmem151b      | INSIDE                 | 1.364                                                        | 2.039                          | 2284.65            | 4657.56            | 2.781                          | 1929.60            | 5367.08            |
| A_68_P25477112 | chr7:129211243-129211287                          | NM_138589:553      | Ubfdf1        | INSIDE                 | 1.364                                                        | 5.681                          | 694.56             | 3946.07            | 7.747                          | 632.13             | 4896.98            |
| A_68_P20778496 | chr1:164501404-164501449                          | NM_016796:468      | Vamp4         | INSIDE                 | 1.364                                                        | 2.376                          | 727.00             | 1727.60            | 3.241                          | 610.91             | 1980.14            |
| A_68_P26158504 | chr8:112229332-112229376                          | NM_001167946:-94   | Zfp821        | PROMOTER               | 1.364                                                        | 1.357                          | 2785.29            | 3778.49            | 1.850                          | 2238.75            | 4141.09            |
| A_68_P27288852 | chr10:80783503-80783547                           | NM_027381:-323     | 2510012J08Rik | PROMOTER               | 1.363                                                        | 1.438                          | 2241.07            | 3223.18            | 1.960                          | 1897.65            | 3720.15            |
| A_68_P32238972 | chrX:7150718-7150762                              | NR_029473:15       | 4930524L23Rik | INSIDE                 | 1.363                                                        | 1.425                          | 892.18             | 1270.99            | 1.941                          | 467.23             | 906.99             |
| A_68_P29940455 | chr14:119105820-119105864                         | NM_001033336:-401  | Abcc4         | PROMOTER               | 1.363                                                        | 2.192                          | 444.95             | 975.45             | 2.989                          | 386.60             | 1155.38            |
| A_68_P27543828 | chr10:128347300-128347344                         | NM_007653:401      | Cd63          | INSIDE                 | 1.363                                                        | 1.593                          | 2565.47            | 4086.57            | 2.172                          | 2080.95            | 4519.18            |
| A_68_P29454311 | chr14:22506206-22506253                           | NM_001013826:27569 | Dupd1         | INSIDE                 | 1.363                                                        | 2.232                          | 524.85             | 1171.62            | 3.044                          | 433.34             | 1318.94            |
| A_68_P21903062 | chr2:180068497-180068541                          | NM_008093:866      | Gata5         | INSIDE                 | 1.363                                                        | 3.218                          | 783.22             | 2520.57            | 4.386                          | 679.87             | 2981.68            |
| A_68_P29613086 | chr14:55194659-55194703                           | NM_010590:1818     | Jub           | INSIDE                 | 1.363                                                        | 2.489                          | 1979.72            | 4926.86            | 3.391                          | 1677.56            | 5688.85            |
| A_68_P24383013 | chr6:39369919-39369963                            | NM_018810:428      | Mkrm1         | INSIDE                 | 1.363                                                        | 2.549                          | 1425.23            | 3632.38            | 3.473                          | 1207.82            | 4195.23            |
| A_68_P21652765 | chr2:134612489-134612533                          | NM_001145830:611   | Plec1         | INSIDE                 | 1.363                                                        | 1.493                          | 4111.13            | 6137.50            | 2.034                          | 3304.93            | 6723.05            |
| A_68_P26818266 | chr9:108998036-108998080                          | NM_172775:109      | Plxnb1        | INSIDE                 | 1.363                                                        | 2.414                          | 582.67             | 1406.34            | 3.289                          | 549.93             | 1808.78            |
| A_68_P24537771 | chr6:71657856-71657900                            | NM_178608:204      | Reep1         | INSIDE                 | 1.363                                                        | 3.930                          | 1707.76            | 6711.48            | 5.355                          | 1465.87            | 7849.29            |
| A_68_P29871957 | chr14:104921836-104921880                         | NM_026047:25       | Rnf219        | INSIDE                 | 1.363                                                        | 2.386                          | 1614.12            | 3850.86            | 3.251                          | 1506.69            | 4898.83            |
| A_68_P23318415 | chr4:133155946-133155990                          | NM_018754:2115     | Sfn           | DOWNSTREAM             | 1.363                                                        | 2.560                          | 2353.04            | 6023.00            | 3.488                          | 1731.94            | 6041.65            |
| A_68_P20412460 | chr1:88400352-88400396                            |                    |               | Unknown                | 1.363                                                        | 1.843                          | 1127.38            | 2077.21            | 2.511                          | 924.65             | 2321.98            |
| A_68_P28914784 | chr13:30077124-30077168                           | NM_010093:786      | E2f3          | INSIDE                 | 1.362                                                        | 3.509                          | 1126.80            | 3954.07            | 4.779                          | 1102.66            | 5269.22            |
| A_68_P27281572 | chr10:79649620-79649664                           | NM_007909:7416     | Efn2          | INSIDE                 | 1.362                                                        | 2.532                          | 1752.70            | 4437.39            | 3.448                          | 1292.57            | 4456.30            |
| A_68_P23404991 | chr4:149610981-149611025                          | NM_023119:-303     | Eno1          | PROMOTER               | 1.362                                                        | 1.847                          | 622.32             | 1149.25            | 2.516                          | 550.40             | 1384.84            |
| A_68_P24908774 | chr6:143115559-143115603                          | NM_029250:-169     | Etnk1         | PROMOTER               | 1.362                                                        | 1.491                          | 1244.29            | 1855.55            | 2.032                          | 1106.83            | 2248.53            |
| A_68_P23570788 | chr5:30441008-30441052                            | NM_001167879:9295  | Fam59b        | INSIDE                 | 1.362                                                        | 1.603                          | 1468.31            | 2353.99            | 2.184                          | 1158.64            | 2530.82            |
| A_68_P23438941 | chr4:154865679-154865723                          | NM_001160016:231   | Gnb1          | INSIDE                 | 1.362                                                        | 3.548                          | 2529.70            | 8975.40            | 4.831                          | 2211.89            | 10686.38           |
| A_68_P21717098 | chr2:146047771-146047815                          | NM_016889:60       | Insm1         | INSIDE                 | 1.362                                                        | 3.054                          | 1048.62            | 3202.55            | 4.161                          | 911.19             | 3791.03            |
| A_68_P28067976 | chr11:100276206-100276250                         | NM_176830:-95      | Leprel4       | DIVERGENT_PROMOTER     | 1.362                                                        | 2.990                          | 1008.38            | 3015.14            | 4.073                          | 901.21             | 3670.91            |
| A_68_P31106322 | chr17:25933806-25933850                           | NM_133719:162      | Metm          | INSIDE                 | 1.362                                                        | 1.699                          | 689.09             | 1170.50            | 2.313                          | 626.86             | 1449.91            |
| A_68_P20348302 | chr1:74438798-74438842                            | NR_029743:-2063    | Mir26b        | PROMOTER               | 1.362                                                        | 2.584                          | 636.14             | 1643.58            | 3.519                          | 801.80             | 2821.38            |
| A_68_P27901890 | chr11:70467341-70467385                           | NM_011072:790      | Pfn1          | INSIDE                 | 1.362                                                        | 3.593                          | 1101.08            | 3956.38            | 4.895                          | 1022.58            | 5005.37            |
| A_68_P20941542 | chr1:193916523-193916567                          | NM_011633:-99      | Traf5         | PROMOTER               | 1.362                                                        | 2.493                          | 3521.84            | 8780.89            | 3.395                          | 2869.11            | 9740.55            |
| A_68_P29117525 | chr13:69878696-69878740                           | NM_001145162:57    | Ube2q11       | INSIDE                 | 1.362                                                        | 2.858                          | 1370.47            | 3916.86            | 3.894                          | 1265.64            | 4928.35            |
| A_68_P30571780 | chr16:17070460-17070504                           | NM_023249:79       | Ypel1         | INSIDE                 | 1.362                                                        | 2.294                          | 633.96             | 1453.98            | 3.125                          | 532.71             | 1664.56            |
| A_68_P32564025 | chrX:98615354-98615398                            | NM_001177985:-123  | Zmym3         | PROMOTER               | 1.362                                                        | 1.536                          | 1503.86            | 2309.65            | 2.092                          | 872.43             | 1825.25            |
| A_68_P22291852 | chr3:84386166-84386211                            | NM_001081093:359   | Arfp1         | INSIDE                 | 1.361                                                        | 1.874                          | 1862.27            | 3490.66            | 2.551                          | 1534.47            | 3914.95            |
| A_68_P26815969 | chr9:108551009-108551053                          | NM_011790:681      | Arih2         | INSIDE                 | 1.361                                                        | 1.913                          | 910.96             | 1742.30            | 2.603                          | 809.45             | 2107.36            |
| A_68_P31845029 | chr18:77182994-77183040                           | NM_001039201:-140  | Hdhd2         | PROMOTER               | 1.361                                                        | 2.124                          | 1149.86            | 2442.61            | 2.891                          | 1039.55            | 3005.11            |
| A_68_P26467130 | chr9:44152085-44152129                            | NM_001110251:-1642 | Hmbs          | PROMOTER               | 1.361                                                        | 2.192                          | 1107.48            | 2428.13            | 2.983                          | 1031.07            | 3075.71            |
| A_68_P27862295 | chr11:63735348-63735392                           | NM_018805:416      | Hs3st3b1      | INSIDE                 | 1.361                                                        | 1.969                          | 1565.83            | 3083.71            | 2.680                          | 1195.83            | 3204.44            |

| ProbeName      | Target position of probe on CpG island microarray | TargetID                | GeneSymbol | CpG island Description | Ratio of relative methylation (TiO <sub>2</sub> -NP/Vehicle) | Sham group                     |                    |                    | TiO <sub>2</sub> -H group      |                    |                    |
|----------------|---------------------------------------------------|-------------------------|------------|------------------------|--------------------------------------------------------------|--------------------------------|--------------------|--------------------|--------------------------------|--------------------|--------------------|
|                |                                                   |                         |            |                        |                                                              | Relative methylation (Cy5/Cy3) | Cy3 signal (Input) | Cy5 signal (MeDIP) | Relative methylation (Cy5/Cy3) | Cy3 signal (Input) | Cy5 signal (MeDIP) |
| A_68_P23399811 | chr4:148681546-148681590                          | NM_207682:239           | Kif1b      | INSIDE                 | 1.361                                                        | 2.065                          | 441.00             | 910.65             | 2.811                          | 399.56             | 1123.33            |
| A_68_P23164367 | chr4:102792385-102792429                          | NM_001039081:412        | Mier1      | INSIDE                 | 1.361                                                        | 1.931                          | 1119.80            | 2162.68            | 2.629                          | 899.38             | 2364.38            |
| A_68_P31425848 | chr17:88374947-88374991                           | NM_010830:579           | Msh6       | INSIDE                 | 1.361                                                        | 2.086                          | 1162.99            | 2425.55            | 2.839                          | 1098.30            | 3117.65            |
| A_68_P26772688 | chr9:100978469-100978513                          | NM_001100451:40         | Msl2       | INSIDE                 | 1.361                                                        | 1.465                          | 1259.57            | 1845.10            | 1.993                          | 1116.02            | 2224.57            |
| A_68_P27687498 | chr11:32121990-32122034                           | NM_010117:281           | Rhbdf1     | INSIDE                 | 1.361                                                        | 1.857                          | 1146.02            | 2128.65            | 2.528                          | 942.75             | 2382.92            |
| A_68_P31003195 | chr17:3114834-3114878                             | NM_134123:-115          | Scaf8      | PROMOTER               | 1.361                                                        | 1.598                          | 476.21             | 760.78             | 2.174                          | 473.73             | 1029.91            |
| A_68_P22411698 | chr3:108087081-108087125                          | NM_019972:53            | Sort1      | INSIDE                 | 1.361                                                        | 1.897                          | 3132.01            | 5941.00            | 2.581                          | 2374.06            | 6127.71            |
| A_68_P31958009 | chr19:11893089-11893134                           | NM_011502:272           | Stx3       | INSIDE                 | 1.361                                                        | 1.890                          | 2811.58            | 5314.04            | 2.573                          | 2393.25            | 6157.28            |
| A_68_P24946870 | chr7:3646016-3646060                              | NM_024168:-71           | Tsen34     | PROMOTER               | 1.361                                                        | 2.702                          | 3686.60            | 9962.49            | 3.677                          | 2903.22            | 10675.36           |
| A_68_P26685864 | chr9:83728415-83728459                            | NM_001110265:141        | Ttk        | INSIDE                 | 1.361                                                        | 1.839                          | 3798.36            | 6984.55            | 2.503                          | 3015.76            | 7548.85            |
| A_68_P26465578 | chr9:43893359-43893403                            | NM_198091:378           | Usp2       | INSIDE                 | 1.361                                                        | 1.883                          | 1890.54            | 3560.74            | 2.564                          | 1506.49            | 3862.12            |
| A_68_P20046440 | chr1:14497095-14497139                            |                         | Unknown    |                        | 1.361                                                        | 5.292                          | 2590.68            | 13710.41           | 7.203                          | 1986.94            | 14312.50           |
| A_68_P22875972 | chr4:44247099-44247143                            | ENSMUST00000153116:-459 |            | PROMOTER               | 1.361                                                        | 1.884                          | 809.90             | 1525.58            | 2.563                          | 729.11             | 1868.62            |
| A_68_P26749718 | chr9:96789794-96789838                            | NM_153420:25            | Acp12      | INSIDE                 | 1.360                                                        | 2.516                          | 1208.35            | 3040.42            | 3.423                          | 1060.90            | 3631.22            |
| A_68_P24639207 | chr6:91423387-91423431                            | NM_133928:9             | Chchd4     | INSIDE                 | 1.360                                                        | 1.479                          | 1769.31            | 2617.20            | 2.011                          | 1498.62            | 3014.42            |
| A_68_P25592938 | chr7:149280400-149280444                          | NM_008748:767           | Dusp8      | INSIDE                 | 1.360                                                        | 2.194                          | 789.10             | 1731.38            | 2.985                          | 574.57             | 1714.93            |
| A_68_P27560006 | chr11:4749005-4749049                             | NM_010898:504           | Nf2        | INSIDE                 | 1.360                                                        | 2.734                          | 1101.42            | 3011.51            | 3.719                          | 910.36             | 3385.51            |
| A_68_P21939653 | chr3:9833472-9833516                              | NM_001195031:185        | Pag1       | INSIDE                 | 1.360                                                        | 1.918                          | 767.65             | 1472.10            | 2.609                          | 635.03             | 1656.72            |
| A_68_P24381543 | chr6:39067895-39067939                            | NM_172893:432           | Parp12     | INSIDE                 | 1.360                                                        | 2.227                          | 1642.62            | 3658.04            | 3.028                          | 1483.86            | 4493.75            |
| A_68_P28036286 | chr11:94902671-94902715                           | NM_133667:-7            | Pdk2       | PROMOTER               | 1.360                                                        | 2.254                          | 1330.35            | 2999.21            | 3.067                          | 1225.86            | 3759.60            |
| A_68_P32694937 | chrX:136145542-136145586                          | NM_023270:406           | Rnf128     | INSIDE                 | 1.360                                                        | 1.800                          | 733.51             | 1319.95            | 2.447                          | 365.61             | 894.79             |
| A_68_P26129567 | chr8:107154779-107154823                          | NM_019662:421           | Rrad       | INSIDE                 | 1.360                                                        | 1.446                          | 1182.94            | 1710.77            | 1.967                          | 1040.72            | 2047.28            |
| A_68_P22871354 | chr4:43394705-43394749                            | NM_001037709:-127       | Rusc2      | PROMOTER               | 1.360                                                        | 2.432                          | 951.83             | 2315.00            | 3.307                          | 871.20             | 2881.09            |
| A_68_P31058947 | chr17:14416697-14416741                           | NM_022315:206           | Smoc2      | INSIDE                 | 1.360                                                        | 1.903                          | 1483.75            | 2823.56            | 2.588                          | 1295.92            | 3353.82            |
| A_68_P21986766 | chr3:21976041-21976085                            | NM_030732:489           | Tbl1xr1    | INSIDE                 | 1.360                                                        | 2.448                          | 1397.89            | 3421.62            | 3.328                          | 1312.91            | 4369.70            |
| A_68_P27365516 | chr10:94978402-94978446                           | NM_080560:629           | Ube2n      | INSIDE                 | 1.360                                                        | 2.455                          | 1631.46            | 4005.41            | 3.340                          | 1469.29            | 4906.85            |
| A_68_P20803943 | chr1:169156624-169156668                          | NM_030724:58612         | Uck2       | INSIDE                 | 1.360                                                        | 8.497                          | 3753.86            | 31896.72           | 11.552                         | 2329.16            | 26907.04           |
| A_68_P20735710 | chr1:156930629-156930673                          | ENSMUST00000128143:-254 |            | PROMOTER               | 1.360                                                        | 1.551                          | 1935.62            | 3001.40            | 2.110                          | 1615.07            | 3407.05            |
| A_68_P31158463 | chr17:35373372-35373416                           | NM_023179:-146          | Atp6v1g2   | DIVERGENT_PROMOTER     | 1.359                                                        | 1.914                          | 2497.39            | 4780.43            | 2.600                          | 2011.96            | 5232.05            |
| A_68_P27796700 | chr11:51781220-51781264                           | NM_029976:110           | Cdkn2aipnl | INSIDE                 | 1.359                                                        | 2.363                          | 1411.32            | 3335.26            | 3.211                          | 1298.73            | 4170.55            |
| A_68_P22412527 | chr3:108217228-108217273                          | NM_001004177:1162       | Celsr2     | INSIDE                 | 1.359                                                        | 2.437                          | 327.37             | 797.66             | 3.312                          | 271.86             | 900.52             |
| A_68_P31620310 | chr18:35990907-35990952                           | NM_133687:1458          | Cxcs5      | INSIDE                 | 1.359                                                        | 2.002                          | 279.55             | 559.53             | 2.721                          | 229.64             | 624.73             |
| A_68_P24449527 | chr6:52210204-52210248                            | NM_008264:648           | Hoxa13     | INSIDE                 | 1.359                                                        | 3.967                          | 1308.24            | 5189.28            | 5.389                          | 1142.69            | 6157.76            |
| A_68_P21006641 | chr2:11457093-11457137                            | NM_00117758:18442       | Pfkfb3     | INSIDE                 | 1.359                                                        | 2.507                          | 1694.90            | 4249.41            | 3.407                          | 1346.83            | 4588.87            |
| A_68_P31655273 | chr18:42555254-42555298                           | NM_138945:1026          | Pou4f3     | INSIDE                 | 1.359                                                        | 1.688                          | 2210.55            | 3732.33            | 2.295                          | 1843.32            | 4230.40            |
| A_68_P23916643 | chr5:98614905-98614949                            | NM_029947:5039          | Prdm8      | INSIDE                 | 1.359                                                        | 1.869                          | 628.31             | 1174.47            | 2.540                          | 506.16             | 1285.51            |
| A_68_P29718153 | chr14:73952777-73952821                           | NM_011506:206           | Sucla2     | INSIDE                 | 1.359                                                        | 2.144                          | 427.53             | 916.50             | 2.913                          | 397.88             | 1159.23            |
| A_68_P28974184 | chr13:40826354-40826399                           | NM_001122948:-564       | Tefap2a    | PROMOTER               | 1.359                                                        | 3.705                          | 5820.36            | 21562.28           | 5.033                          | 4575.69            | 23028.54           |
| A_68_P33005816 | A_68_P33005816                                    |                         | Unknown    |                        | 1.359                                                        | 2.659                          | 388.66             | 1033.63            | 3.615                          | 323.22             | 1168.46            |
| A_68_P23692834 | chr5:52507355-52507399                            | AK076709:-1175          |            | PROMOTER               | 1.359                                                        | 1.615                          | 1889.57            | 3052.55            | 2.195                          | 1493.69            | 3279.23            |
| A_68_P25587958 | chr7:148480452-148480496                          | NM_007878:2570          | Drd4       | INSIDE                 | 1.358                                                        | 1.707                          | 1909.73            | 3259.96            | 2.318                          | 1638.20            | 3796.62            |
| A_68_P31769415 | chr18:63546129-63546173                           | NM_001039485:687        | Fam38b     | INSIDE                 | 1.358                                                        | 2.290                          | 1864.44            | 4269.70            | 3.110                          | 1624.13            | 5051.65            |
| A_68_P26467611 | chr9:44248858-44248902                            | NM_001033469:71         | Foxr1      | INSIDE                 | 1.358                                                        | 2.455                          | 1282.79            | 3149.56            | 3.335                          | 957.04             | 3191.29            |
| A_68_P20058119 | chr1:17081907-17081951                            | NM_020604:6042          | Jph1       | INSIDE                 | 1.358                                                        | 2.532                          | 479.42             | 1213.87            | 3.439                          | 443.56             | 1525.24            |
| A_68_P25098809 | chr7:53651661-53651705                            | NM_008421:-155          | Kcnc1      | PROMOTER               | 1.358                                                        | 3.971                          | 520.29             | 2066.17            | 5.395                          | 528.12             | 2848.95            |
| A_68_P31123750 | chr17:28826626-28826670                           | NM_001168508:-1638      | Mapk14     | PROMOTER               | 1.358                                                        | 2.749                          | 1067.98            | 2935.78            | 3.733                          | 901.71             | 3366.23            |
| A_68_P20088276 | chr1:23389423-23389467                            | NM_001081079:570        | Ogfr1l     | INSIDE                 | 1.358                                                        | 3.591                          | 630.15             | 2262.87            | 4.877                          | 523.96             | 2555.37            |
| A_68_P29509082 | chr14:31814863-31814907                           | NM_026911:-32           | Spes1      | PROMOTER               | 1.358                                                        | 7.876                          | 445.18             | 3506.37            | 10.697                         | 415.82             | 4447.88            |
| A_68_P21370052 | chr2:79475902-79475946                            | NM_080558:343           | Ssfa2      | INSIDE                 | 1.358                                                        | 1.723                          | 2895.47            | 4988.92            | 2.340                          | 2403.07            | 5623.52            |
| A_68_P24907675 | chr6:142912528-142912572                          | NM_011374:422           | St8sia1    | INSIDE                 | 1.358                                                        | 1.772                          | 1785.69            | 3164.63            | 2.407                          | 1266.13            | 3047.71            |
| A_68_P24951676 | chr7:4982246-4982290                              | NM_001033383:10291      | Zfp865     | INSIDE                 | 1.358                                                        | 2.423                          | 1233.64            | 2989.54            | 3.290                          | 975.09             | 3207.93            |

| ProbeName      | Target position of probe on CpG island microarray | TargetID            | GeneSymbol | CpG island Description | Ratio of relative methylation (TiO <sub>2</sub> -NP/Vehicle) | Sham group                     |                    |                    | TiO <sub>2</sub> -H group      |                    |                    |
|----------------|---------------------------------------------------|---------------------|------------|------------------------|--------------------------------------------------------------|--------------------------------|--------------------|--------------------|--------------------------------|--------------------|--------------------|
|                |                                                   |                     |            |                        |                                                              | Relative methylation (Cy5/Cy3) | Cy3 signal (Input) | Cy5 signal (MeDIP) | Relative methylation (Cy5/Cy3) | Cy3 signal (Input) | Cy5 signal (MeDIP) |
| A_68_P27288263 | chr10:80702990-80703034                           | NM_001034895:7105   | Zfr2       | INSIDE                 | 1.358                                                        | 3.781                          | 647.33             | 2447.83            | 5.134                          | 514.02             | 2639.05            |
| A_68_P27765615 | chr11:45869497-45869541                           | NM_009616:30        | Adam19     | INSIDE                 | 1.357                                                        | 2.475                          | 1814.11            | 4490.02            | 3.359                          | 1298.58            | 4361.56            |
| A_68_P30473398 | chr15:97975961-97976005                           | NM_001170710:151    | Asb8       | INSIDE                 | 1.357                                                        | 2.239                          | 2378.64            | 5324.89            | 3.038                          | 1972.24            | 5992.46            |
| A_68_P21897026 | chr2:179176969-179177013                          | NM_009867:-192      | Cdh4       | PROMOTER               | 1.357                                                        | 2.400                          | 941.21             | 2259.13            | 3.256                          | 808.82             | 2633.70            |
| A_68_P25958451 | chr8:74233667-74233711                            | NM_028715:15892     | Fcho1      | INSIDE                 | 1.357                                                        | 2.488                          | 2287.70            | 5691.25            | 3.376                          | 1781.15            | 6012.42            |
| A_68_P29228410 | chr13:94074181-94074225                           | NM_011982:-247      | Homer1     | PROMOTER               | 1.357                                                        | 2.763                          | 1506.26            | 4161.77            | 3.750                          | 1305.27            | 4895.03            |
| A_68_P21812073 | chr2:163201933-163201977                          | NM_021566:21755     | Jph2       | INSIDE                 | 1.357                                                        | 2.387                          | 517.55             | 1235.46            | 3.240                          | 440.74             | 1427.76            |
| A_68_P31424878 | chr17:88145892-88145936                           | NM_199251:51420     | Kenk12     | INSIDE                 | 1.357                                                        | 1.503                          | 1312.07            | 1971.76            | 2.039                          | 1064.52            | 2170.80            |
| A_68_P22868863 | chr4:42929796-42929840                            | NM_172690:-304      | N28178     | PROMOTER               | 1.357                                                        | 3.146                          | 467.50             | 1470.79            | 4.269                          | 417.48             | 1782.29            |
| A_68_P25050058 | chr7:36370084-36370128                            | NM_145840:495       | Rgs9bp     | INSIDE                 | 1.357                                                        | 2.270                          | 661.86             | 1502.42            | 3.080                          | 603.50             | 1858.72            |
| A_68_P30255504 | chr15:59479090-59479134                           | NM_144549:-1096     | Trib1      | PROMOTER               | 1.357                                                        | 1.527                          | 949.03             | 1449.63            | 2.073                          | 723.73             | 1499.94            |
| A_68_P28741417 | chr12:112215277-112215321                         | NM_175207:1933      | Ankrd9     | INSIDE                 | 1.356                                                        | 2.526                          | 336.41             | 849.76             | 3.425                          | 312.11             | 1069.03            |
| A_68_P28669124 | chr12:99497596-99497640                           | NM_008079:-71       | Galc       | DIVERGENT_PROMOTER     | 1.356                                                        | 2.292                          | 1424.45            | 3264.84            | 3.107                          | 1240.70            | 3855.38            |
| A_68_P28290299 | chr12:25257426-25257470                           | NM_145890:-8135     | Grlh1      | PROMOTER               | 1.356                                                        | 1.773                          | 1594.35            | 2827.16            | 2.404                          | 1278.35            | 3073.66            |
| A_68_P31255286 | chr17:56465347-56465391                           | NM_172132:-104      | Kdm4b      | PROMOTER               | 1.356                                                        | 3.863                          | 1908.78            | 7373.43            | 5.239                          | 1735.55            | 9092.43            |
| A_68_P22882724 | chr4:45421232-45421276                            | NM_001009949:384    | Mcart1     | INSIDE                 | 1.356                                                        | 1.897                          | 1805.70            | 3425.43            | 2.572                          | 1310.37            | 3370.89            |
| A_68_P27795021 | chr11:51449266-51449310                           | NM_025346:110       | Rmnd5b     | INSIDE                 | 1.356                                                        | 4.161                          | 516.21             | 2147.72            | 5.642                          | 508.89             | 2871.36            |
| A_68_P20024136 | chr11:9788012-9788056                             | NM_133220:-176      | Sgk3       | PROMOTER               | 1.356                                                        | 4.194                          | 1044.55            | 4380.35            | 5.688                          | 908.73             | 5168.57            |
| A_68_P31381749 | chr17:80606236-80606280                           | NM_001195485:387    | Srsf7      | INSIDE                 | 1.356                                                        | 1.494                          | 7234.62            | 10806.48           | 2.026                          | 5253.97            | 10642.61           |
| A_68_P27971718 | chr11:83286618-83286662                           | NM_027427:31        | Taf15      | INSIDE                 | 1.356                                                        | 8.044                          | 1308.94            | 10529.64           | 10.909                         | 1225.83            | 13372.08           |
| A_68_P31209392 | chr17:47027759-47027803                           | NM_178385:211       | Tbcc       | INSIDE                 | 1.356                                                        | 1.883                          | 3135.97            | 5904.23            | 2.553                          | 2378.32            | 6072.48            |
| A_68_P30484944 | chr15:100111219-100111263                         | NM_183109:-27       | Tmprss12   | PROMOTER               | 1.356                                                        | 2.156                          | 415.05             | 895.01             | 2.924                          | 316.24             | 924.60             |
| A_68_P30328150 | chr15:72891418-72891462                           | NM_029640:-5198     | Trappe9    | PROMOTER               | 1.356                                                        | 1.371                          | 2665.84            | 3654.67            | 1.858                          | 2154.79            | 4004.25            |
| A_68_P32533199 | chrX:90533865-90533909                            | NM_007492:1902      | Arx        | INSIDE                 | 1.355                                                        | 2.142                          | 1899.44            | 4068.56            | 2.903                          | 1239.21            | 3597.10            |
| A_68_P31399352 | chr17:83913503-83913547                           | NM_001159529:149    | Cox7a2l    | INSIDE                 | 1.355                                                        | 1.556                          | 848.42             | 1320.11            | 2.109                          | 742.39             | 1565.67            |
| A_68_P24423150 | chr6:47404743-47404787                            | NM_012042:442       | Cul1       | INSIDE                 | 1.355                                                        | 1.800                          | 723.60             | 1302.32            | 2.439                          | 653.62             | 1593.97            |
| A_68_P23325561 | chr4:134479965-134480009                          | NM_023665:447       | D4Wsu53e   | INSIDE                 | 1.355                                                        | 3.398                          | 2142.02            | 7278.91            | 4.605                          | 1818.26            | 8373.31            |
| A_68_P30113005 | chr15:31154387-31154431                           | NM_146057:269       | Dap        | INSIDE                 | 1.355                                                        | 1.369                          | 1518.58            | 2079.26            | 1.856                          | 1191.38            | 2211.13            |
| A_68_P24138257 | chr5:140384753-140384797                          | NM_175522:878       | Elfn1      | INSIDE                 | 1.355                                                        | 1.525                          | 811.28             | 1237.10            | 2.065                          | 768.93             | 1588.21            |
| A_68_P21338547 | chr2:74493903-74493947                            | NM_007967:3552      | Evx2       | INSIDE                 | 1.355                                                        | 3.343                          | 349.06             | 1166.95            | 4.530                          | 318.51             | 1442.81            |
| A_68_P21428052 | chr2:92211160-92211204                            | NM_001166633:111    | Gylt1b     | INSIDE                 | 1.355                                                        | 2.320                          | 1224.27            | 2840.76            | 3.144                          | 959.15             | 3015.32            |
| A_68_P22218631 | chr3:68809558-68809602                            | NR_029529:-4113     | Mir15b     | PROMOTER               | 1.355                                                        | 1.957                          | 1913.91            | 3745.63            | 2.652                          | 1423.59            | 3775.34            |
| A_68_P22342633 | chr3:94977194-94977238                            | NM_011351:8921      | Sema6c     | INSIDE                 | 1.355                                                        | 2.157                          | 1867.57            | 4028.64            | 2.922                          | 1490.67            | 4355.66            |
| A_68_P31421397 | chr17:87534362-87534421                           | NM_019654:27373     | Socs5      | INSIDE                 | 1.355                                                        | 2.229                          | 258.24             | 575.61             | 3.021                          | 242.91             | 733.71             |
| A_68_P28051188 | chr11:97398038-97398082                           | NM_018873:38380     | Srcin1     | INSIDE                 | 1.355                                                        | 2.770                          | 1139.86            | 3157.30            | 3.754                          | 924.48             | 3470.35            |
| A_68_P23223183 | chr4:114736145-114736189                          | NM_011527:4035      | Tal1       | INSIDE                 | 1.355                                                        | 3.038                          | 538.70             | 1636.78            | 4.117                          | 415.29             | 1709.74            |
| A_68_P27985546 | chr11:85647033-85647077                           | NM_009324:938       | Tbx2       | INSIDE                 | 1.355                                                        | 5.637                          | 4673.73            | 26343.99           | 7.638                          | 3623.94            | 27678.21           |
| A_68_P23297751 | chr4:129318057-129318101                          | NM_001005506:-29    | Txlna      | PROMOTER               | 1.355                                                        | 1.833                          | 5046.79            | 9250.43            | 2.483                          | 3828.55            | 9505.34            |
| A_68_P23358589 | chr4:140071100-140071144                          | NM_001112723:133549 | Arhgef10l  | INSIDE                 | 1.354                                                        | 2.587                          | 423.43             | 1095.63            | 3.504                          | 399.52             | 1399.80            |
| A_68_P25274217 | chr7:88973759-88973803                            | NM_146193:537       | Tbtd1      | INSIDE                 | 1.354                                                        | 2.131                          | 829.29             | 1767.39            | 2.887                          | 778.59             | 2247.43            |
| A_68_P30508958 | chr16:4214152-4214196                             | NM_001025432:-770   | Crebbp     | PROMOTER               | 1.354                                                        | 3.169                          | 968.07             | 3068.05            | 4.291                          | 889.88             | 3818.04            |
| A_68_P23320290 | chr4:133524024-133524068                          | NM_016957:-140      | Hmgn2      | PROMOTER               | 1.354                                                        | 2.333                          | 2847.55            | 6643.49            | 3.158                          | 2230.36            | 7044.42            |
| A_68_P29010691 | chr13:47024841-47024885                           | NM_010617:225       | Kif13a     | INSIDE                 | 1.354                                                        | 3.743                          | 2168.68            | 8117.07            | 5.068                          | 1869.97            | 9476.71            |
| A_68_P28206077 | chr12:5382789-5382833                             | NM_001164493:-322   | Klhl29     | DIVERGENT_PROMOTER     | 1.354                                                        | 2.654                          | 871.38             | 2312.70            | 3.593                          | 700.41             | 2516.89            |
| A_68_P24947984 | chr7:4101189-4101233                              | NM_175529:264       | Leng9      | INSIDE                 | 1.354                                                        | 1.783                          | 683.29             | 1218.35            | 2.414                          | 631.11             | 1523.52            |
| A_68_P20007250 | chr1:4797717-4797761                              | NM_008866:-235      | Lypla1     | PROMOTER               | 1.354                                                        | 3.212                          | 454.86             | 1461.19            | 4.351                          | 455.05             | 1979.79            |
| A_68_P20849642 | chr1:177622972-177623016                          | NM_010098:-273      | Opn3       | DIVERGENT_PROMOTER     | 1.354                                                        | 3.511                          | 3696.49            | 12979.44           | 4.755                          | 2887.33            | 13729.03           |
| A_68_P31421395 | chr17:87534146-87534190                           | NM_019654:27150     | Socs5      | INSIDE                 | 1.354                                                        | 2.103                          | 500.87             | 1053.44            | 2.848                          | 331.39             | 943.73             |
| A_68_P28402111 | chr12:46175015-46175059                           | NM_144552:434       | Stxbp6     | INSIDE                 | 1.354                                                        | 2.043                          | 8270.30            | 16896.14           | 2.767                          | 6107.35            | 16899.76           |
| A_68_P30349160 | chr15:76406761-76406805                           | NM_172960:-6        | Adek5      | PROMOTER               | 1.353                                                        | 1.912                          | 1435.20            | 2744.49            | 2.587                          | 1309.33            | 3387.57            |
| A_68_P21901913 | chr2:179906128-179906172                          | NM_019822:-142      | Adrm1      | PROMOTER               | 1.353                                                        | 2.249                          | 536.72             | 1207.15            | 3.043                          | 546.14             | 1661.97            |

| ProbeName      | Target position of probe on CpG island microarray | TargetID                 | GeneSymbol    | CpG island Description | Ratio of relative methylation (TiO <sub>2</sub> -NP/Vehicle) | Sham group                     |                    |                    | TiO <sub>2</sub> -H group      |                    |                    |
|----------------|---------------------------------------------------|--------------------------|---------------|------------------------|--------------------------------------------------------------|--------------------------------|--------------------|--------------------|--------------------------------|--------------------|--------------------|
|                |                                                   |                          |               |                        |                                                              | Relative methylation (Cy5/Cy3) | Cy3 signal (Input) | Cy5 signal (MeDIP) | Relative methylation (Cy5/Cy3) | Cy3 signal (Input) | Cy5 signal (MeDIP) |
| A_68_P29413816 | chr14:13655475-13655519                           | NM_001042617:97          | Cadps         | INSIDE                 | 1.353                                                        | 2.294                          | 1232.12            | 2827.09            | 3.103                          | 1014.73            | 3149.20            |
| A_68_P24154206 | chr5:143722119-143722163                          | NM_007984:107            | Fscn1         | INSIDE                 | 1.353                                                        | 2.117                          | 1448.25            | 3066.19            | 2.864                          | 1282.20            | 3672.75            |
| A_68_P20799113 | chr1:168168950-168168994                          | NM_175296:-97            | Mael          | PROMOTER               | 1.353                                                        | 2.194                          | 792.66             | 1738.88            | 2.967                          | 621.81             | 1844.92            |
| A_68_P22825640 | chr4:33275997-33276041                            | NM_001034867:694         | Pm20d2        | INSIDE                 | 1.353                                                        | 1.769                          | 751.45             | 1329.68            | 2.394                          | 836.59             | 2003.17            |
| A_68_P20636473 | chr1:136852289-136852333                          | NM_001081307:207         | Ppp1r12b      | INSIDE                 | 1.353                                                        | 5.648                          | 1800.34            | 10168.16           | 7.642                          | 1490.00            | 11385.87           |
| A_68_P27561411 | chr11:4999553-4999597                             | NM_177370:134            | Rhbdd3        | INSIDE                 | 1.353                                                        | 2.588                          | 756.61             | 1957.93            | 3.502                          | 639.15             | 2238.47            |
| A_68_P23317104 | chr4:132894918-132894962                          | NM_199306:290            | Wdte1         | INSIDE                 | 1.353                                                        | 2.205                          | 791.17             | 1744.65            | 2.983                          | 755.02             | 2252.60            |
| A_68_P24951576 | chr7:4967342-4967386                              | NM_025324:255            | Zfp524        | INSIDE                 | 1.353                                                        | 3.487                          | 1823.33            | 6357.48            | 4.718                          | 1604.79            | 7571.15            |
| A_68_P21622683 | chr2:128864800-128864844                          | ENSMUST00000145798:16689 |               | INSIDE                 | 1.353                                                        | 2.007                          | 928.98             | 1864.50            | 2.716                          | 839.61             | 2280.31            |
| A_68_P25357074 | chr7:105804627-105804671                          | NM_172280:431            | 2210018M11Rik | INSIDE                 | 1.352                                                        | 3.522                          | 2626.25            | 9249.25            | 4.763                          | 2332.64            | 11110.79           |
| A_68_P28449510 | chr12:55963628-55963672                           | NM_007688:214            | Cf2           | INSIDE                 | 1.352                                                        | 3.331                          | 1397.96            | 4657.07            | 4.503                          | 1155.87            | 5205.38            |
| A_68_P28143432 | chr11:113545919-113545963                         | NM_177777:215            | D11Wsu47c     | INSIDE                 | 1.352                                                        | 2.503                          | 3355.22            | 8398.52            | 3.385                          | 2468.17            | 8355.60            |
| A_68_P24501227 | chr6:63205942-63205990                            | NM_008167:-884           | Grid2         | PROMOTER               | 1.352                                                        | 3.292                          | 166.72             | 548.82             | 4.452                          | 156.51             | 696.82             |
| A_68_P31425165 | chr17:88198232-88198276                           | NM_199251:-920           | Kenk12        | PROMOTER               | 1.352                                                        | 2.405                          | 858.46             | 2064.29            | 3.251                          | 787.51             | 2560.10            |
| A_68_P28516078 | chr12:70825634-70825678                           | NM_145443:205            | L2hgdh        | INSIDE                 | 1.352                                                        | 1.922                          | 2372.19            | 4558.42            | 2.598                          | 2034.28            | 5285.87            |
| A_68_P21081081 | chr2:26766063-26766107                            | NM_001033908:78          | Med22         | INSIDE                 | 1.352                                                        | 1.373                          | 601.65             | 8253.93            | 1.857                          | 4490.83            | 8339.26            |
| A_68_P28831284 | chr13:12350487-12350531                           | NM_001081128:-241        | Mtr           | PROMOTER               | 1.352                                                        | 1.899                          | 1347.79            | 2559.38            | 2.567                          | 1046.52            | 2686.24            |
| A_68_P27857775 | chr11:62945991-62946035                           | NM_008885:1001           | Pmp22         | INSIDE                 | 1.352                                                        | 3.144                          | 1566.53            | 4925.80            | 4.251                          | 1451.94            | 6172.10            |
| A_68_P21820792 | chr2:164793405-164793449                          | NM_020333:-61            | Stc12a5       | PROMOTER               | 1.352                                                        | 1.914                          | 754.00             | 1443.04            | 2.588                          | 676.97             | 1751.94            |
| A_68_P26238818 | chr8:125778428-125778472                          | NM_020497:356            | Zfp276        | INSIDE                 | 1.352                                                        | 1.703                          | 968.26             | 1649.17            | 2.302                          | 713.76             | 1643.32            |
| A_68_P25735806 | chr8:28088778-28088822                            | NM_001101502:993         | Zfp703        | INSIDE                 | 1.352                                                        | 1.463                          | 2200.89            | 3219.55            | 1.978                          | 1519.14            | 3004.28            |
| A_68_P22509004 | chr3:127201898-127201942                          | ENSMUST00000104965:-1    |               | PROMOTER               | 1.352                                                        | 3.319                          | 1159.32            | 3847.87            | 4.486                          | 944.78             | 4238.11            |
| A_68_P29656176 | chr14:63174690-63174734                           | ENSMUST00000160745:101   |               | INSIDE                 | 1.352                                                        | 12.068                         | 731.90             | 8832.82            | 16.313                         | 732.20             | 11944.22           |
| A_68_P30568280 | chr16:16146642-16146686                           | NM_146068:262            | 2310008H04Rik | INSIDE                 | 1.351                                                        | 3.121                          | 1423.97            | 4444.92            | 4.217                          | 1239.77            | 5228.61            |
| A_68_P22942710 | chr4:57003066-57003110                            | NM_001142965:175         | 6430704M03Rik | INSIDE                 | 1.351                                                        | 3.860                          | 405.32             | 1564.37            | 5.213                          | 526.59             | 2744.90            |
| A_68_P29747537 | chr14:79124881-79124925                           | NM_001081336:-6          | Dgkh          | PROMOTER               | 1.351                                                        | 2.255                          | 848.39             | 1913.52            | 3.048                          | 683.30             | 2082.64            |
| A_68_P32541781 | chrX:92639710-92639754                            | NM_175179:447            | Fam123b       | INSIDE                 | 1.351                                                        | 2.399                          | 2316.60            | 5557.38            | 3.240                          | 1138.92            | 3690.06            |
| A_68_P28997659 | chr13:44826258-44826302                           | NM_001205043:-359        | Jarid2        | PROMOTER               | 1.351                                                        | 1.460                          | 893.50             | 1304.83            | 1.972                          | 875.17             | 1726.24            |
| A_68_P21421187 | chr2:91023173-91023217                            | NM_001177720:-3716       | Madd          | PROMOTER               | 1.351                                                        | 3.258                          | 1096.95            | 3574.40            | 4.403                          | 958.05             | 4218.22            |
| A_68_P22949803 | chr4:58218825-58218869                            | NM_022814:622            | Svep1         | INSIDE                 | 1.351                                                        | 2.522                          | 578.72             | 1459.31            | 3.406                          | 486.29             | 1656.44            |
| A_68_P30566187 | chr16:15594249-15594293                           | NM_001159351:341         | Ube2v2        | INSIDE                 | 1.351                                                        | 2.127                          | 4254.61            | 9048.22            | 2.872                          | 3286.73            | 9440.89            |
| A_68_P24091119 | chr5:130371741-130371785                          | NM_183088:170            | 2410018M08Rik | INSIDE                 | 1.350                                                        | 4.754                          | 1452.40            | 6904.13            | 6.418                          | 1168.93            | 7501.85            |
| A_68_P21631948 | chr2:130665681-130665725                          | NM_029432:144            | 4930402H24Rik | INSIDE                 | 1.350                                                        | 1.883                          | 1526.30            | 2873.28            | 2.542                          | 1369.48            | 3481.37            |
| A_68_P27958472 | chr11:80965947-80965991                           | NM_007384:437            | Accn1         | INSIDE                 | 1.350                                                        | 2.931                          | 228.85             | 670.79             | 3.958                          | 228.19             | 903.09             |
| A_68_P23315180 | chr4:132568310-132568354                          | NM_146155:912            | Ahdcl1        | INSIDE                 | 1.350                                                        | 2.566                          | 577.69             | 1482.17            | 3.464                          | 557.57             | 1931.48            |
| A_68_P24990327 | chr7:19479355-19479399                            | NM_001033314:16377       | Ccdc61        | INSIDE                 | 1.350                                                        | 4.732                          | 4065.99            | 19240.24           | 6.387                          | 3400.00            | 21717.34           |
| A_68_P26236516 | chr8:125394674-125394718                          | NM_007662:22423          | Cdh15         | DOWNSTREAM             | 1.350                                                        | 4.613                          | 1240.67            | 5722.78            | 6.225                          | 973.31             | 6058.68            |
| A_68_P27894661 | chr11:69182323-69182367                           | NM_146019:584            | Chd3          | INSIDE                 | 1.350                                                        | 1.733                          | 598.91             | 1037.71            | 2.340                          | 511.00             | 1195.65            |
| A_68_P23155324 | chr4:101169410-101169454                          | NM_198412:180            | Dnajc6        | INSIDE                 | 1.350                                                        | 1.697                          | 1936.17            | 3284.88            | 2.290                          | 1410.10            | 3228.90            |
| A_68_P23309924 | chr4:131604876-131604920                          | NM_001128606:95          | Epb4.1        | INSIDE                 | 1.350                                                        | 4.441                          | 2377.59            | 10558.25           | 5.995                          | 2028.13            | 12159.05           |
| A_68_P26224362 | chr8:123609059-123609103                          | NM_010426:707            | Foxf1a        | INSIDE                 | 1.350                                                        | 2.194                          | 1213.76            | 2662.70            | 2.961                          | 920.81             | 2726.96            |
| A_68_P24620344 | chr6:88147093-88147137                            | NM_008090:-1543          | Gata2         | PROMOTER               | 1.350                                                        | 2.203                          | 587.48             | 1294.48            | 2.974                          | 532.80             | 1584.60            |
| A_68_P29613096 | chr14:55195734-55195778                           | NM_010590:742            | Jub           | INSIDE                 | 1.350                                                        | 7.990                          | 2719.59            | 21729.66           | 10.785                         | 2234.76            | 24101.80           |
| A_68_P27528046 | chr10:125403373-125403417                         | NM_177152:120            | Lrig3         | INSIDE                 | 1.350                                                        | 4.085                          | 1673.97            | 6838.45            | 5.516                          | 1338.69            | 7384.71            |
| A_68_P22209747 | chr3:67178066-67178110                            | NM_001039543:70          | Mif1          | INSIDE                 | 1.350                                                        | 1.503                          | 1142.03            | 1716.40            | 2.028                          | 1022.81            | 2074.71            |
| A_68_P21840226 | chr2:168056561-168056605                          | NM_001160330:461         | Mocs3         | INSIDE                 | 1.350                                                        | 4.757                          | 442.98             | 2107.05            | 6.422                          | 371.87             | 2388.16            |
| A_68_P26500015 | chr9:49606210-49606254                            | NM_001081445:942         | Neam1         | INSIDE                 | 1.350                                                        | 2.107                          | 750.15             | 1580.35            | 2.844                          | 631.11             | 1794.89            |
| A_68_P26477175 | chr9:45792523-45792567                            | NM_008775:410            | Pafah1b2      | INSIDE                 | 1.350                                                        | 1.712                          | 1861.35            | 3187.50            | 2.312                          | 1644.22            | 3802.17            |
| A_68_P29116256 | chr13:69673614-69673658                           | NM_001169131:-894        | Papd7         | PROMOTER               | 1.350                                                        | 1.569                          | 2724.26            | 4273.30            | 2.117                          | 2356.71            | 4989.79            |
| A_68_P27551126 | chr11:3190443-3190488                             | NM_019574:6              | Patz1         | INSIDE                 | 1.350                                                        | 1.532                          | 1497.99            | 2294.67            | 2.067                          | 1338.58            | 2767.13            |
| A_68_P27949793 | chr11:79404552-79404596                           | NM_175543:-139           | Rab11fip4     | PROMOTER               | 1.350                                                        | 2.519                          | 1244.98            | 3136.67            | 3.401                          | 1099.13            | 3737.89            |

| ProbeName      | Target position of probe on CpG island microarray | TargetID                 | GeneSymbol    | CpG island Description | Ratio of relative methylation (TiO <sub>2</sub> -NP/Vehicle) | Sham group                     |                    |                    | TiO <sub>2</sub> -H group      |                    |                    |
|----------------|---------------------------------------------------|--------------------------|---------------|------------------------|--------------------------------------------------------------|--------------------------------|--------------------|--------------------|--------------------------------|--------------------|--------------------|
|                |                                                   |                          |               |                        |                                                              | Relative methylation (Cy5/Cy3) | Cy3 signal (Input) | Cy5 signal (MeDIP) | Relative methylation (Cy5/Cy3) | Cy3 signal (Input) | Cy5 signal (MeDIP) |
| A_68_P27907304 | chr11:71565101-71565145                           | NM_177618:918            | Wscd1         | INSIDE                 | 1.350                                                        | 1.817                          | 798.47             | 1450.58            | 2.452                          | 704.74             | 1728.38            |
| A_68_P32111692 | chr19:40969658-40969702                           | NM_028319:486            | Zfp518a       | INSIDE                 | 1.350                                                        | 2.005                          | 5300.44            | 10629.34           | 2.707                          | 4430.67            | 11994.26           |
| A_68_P22300151 | chr3:85775250-85775294                            | ENSMUST00000158452:-8518 |               | PROMOTER               | 1.350                                                        | 2.485                          | 692.09             | 1720.00            | 3.354                          | 680.90             | 2283.78            |
| A_68_P30382914 | chr15:82176511-82176555                           | NM_026914:57             | 1500032L24Rik | INSIDE                 | 1.349                                                        | 4.575                          | 1510.15            | 6909.63            | 6.171                          | 1513.47            | 9339.25            |
| A_68_P24098222 | chr5:131916544-131916588                          | NM_177047:1101647        | Auts2         | INSIDE                 | 1.349                                                        | 4.268                          | 378.96             | 1617.35            | 5.756                          | 342.54             | 1971.59            |
| A_68_P30478823 | chr15:99055100-99055144                           | NM_010601:-284           | Kenh3         | PROMOTER               | 1.349                                                        | 1.660                          | 545.35             | 905.02             | 2.239                          | 508.01             | 1137.66            |
| A_68_P30682957 | chr16:37868699-37868743                           | NM_177093:235            | Lrre58        | INSIDE                 | 1.349                                                        | 2.636                          | 1457.85            | 3842.19            | 3.557                          | 1184.30            | 4211.97            |
| A_68_P24731710 | chr6:108090490-108090549                          | NM_145937:45058          | Sumf1         | INSIDE                 | 1.349                                                        | 5.960                          | 233.08             | 1389.11            | 8.038                          | 185.59             | 1491.64            |
| A_68_P29448169 | chr14:21480603-21480647                           | NM_175132:6904           | Synpo2l       | INSIDE                 | 1.349                                                        | 1.484                          | 656.87             | 974.96             | 2.002                          | 569.66             | 1140.74            |
| A_68_P23282960 | chr4:126645057-126645101                          | NM_001114399:89          | Zmym4         | INSIDE                 | 1.349                                                        | 2.115                          | 2067.77            | 4373.83            | 2.854                          | 1783.97            | 5092.09            |
| A_68_P26663734 | chr9:79190352-79190396                            |                          |               | Unknown                | 1.349                                                        | 2.174                          | 1089.87            | 2369.86            | 2.933                          | 884.61             | 2594.65            |
| A_68_P23593955 | chr5:34713045-34713089                            | ENSMUST00000042234:5     |               | INSIDE                 | 1.349                                                        | 4.173                          | 510.56             | 2130.77            | 5.630                          | 450.09             | 2534.10            |
| A_68_P31154763 | chr17:34742756-34742800                           | NM_001163379:-27         | Agpat1        | DIVERGENT_PROMOTER     | 1.348                                                        | 1.589                          | 1297.92            | 2062.07            | 2.141                          | 1067.47            | 2285.71            |
| A_68_P24540594 | chr6:72185394-72185438                            | NM_153778:155            | Atoh8         | INSIDE                 | 1.348                                                        | 2.927                          | 1388.35            | 4063.95            | 3.945                          | 1073.45            | 4234.55            |
| A_68_P26234162 | chr8:125075132-125075176                          | NM_001037298:75          | Fam38a        | INSIDE                 | 1.348                                                        | 2.716                          | 835.72             | 2269.80            | 3.661                          | 879.62             | 3220.14            |
| A_68_P20351021 | chr1:74929129-74929173                            | NM_153111:2832           | Fev           | INSIDE                 | 1.348                                                        | 3.448                          | 1564.46            | 5394.70            | 4.649                          | 1378.08            | 6407.18            |
| A_68_P30490428 | chr15:101054889-101054933                         | NM_019518:273            | Grasp         | INSIDE                 | 1.348                                                        | 0.394                          | 1524.89            | 600.94             | 0.531                          | 1193.36            | 634.07             |
| A_68_P31489152 | chr18:10325147-10325191                           | NM_001083628:-8          | Greb1l        | PROMOTER               | 1.348                                                        | 4.009                          | 1463.51            | 5866.73            | 5.403                          | 1090.28            | 5890.53            |
| A_68_P26349535 | chr9:21722823-21722867                            | NM_031874:-279           | Rab3d         | PROMOTER               | 1.348                                                        | 1.640                          | 4313.75            | 7073.43            | 2.211                          | 2985.88            | 6600.80            |
| A_68_P31930774 | chr19:5771196-5771240                             | NM_023912:183            | Seyl1         | INSIDE                 | 1.348                                                        | 0.402                          | 1293.41            | 519.44             | 0.541                          | 1001.35            | 541.92             |
| A_68_P21623516 | chr2:129024287-129024331                          | NM_001159593:-200        | Ste20a1       | PROMOTER               | 1.348                                                        | 2.524                          | 1562.08            | 3942.32            | 3.402                          | 1464.39            | 4981.84            |
| A_68_P30580561 | chr16:18582686-18582730                           | NM_011532:4354           | Tbx1          | INSIDE                 | 1.348                                                        | 1.717                          | 761.91             | 1308.00            | 2.315                          | 639.79             | 1480.99            |
| A_68_P27590826 | chr11:11362086-11362130                           | NM_001185153:314         | Zpbp          | INSIDE                 | 1.348                                                        | 6.592                          | 539.80             | 3558.60            | 8.889                          | 478.90             | 4257.03            |
| A_68_P24591142 | chr6:83004903-83004947                            | NM_007517:278            | Aup1          | INSIDE                 | 1.347                                                        | 1.420                          | 1180.63            | 1676.14            | 1.913                          | 980.14             | 1874.80            |
| A_68_P27812114 | chr11:54601209-54601253                           | NM_178626:-25            | Cde42se2      | PROMOTER               | 1.347                                                        | 3.405                          | 812.15             | 2765.33            | 4.587                          | 734.19             | 3367.84            |
| A_68_P31166952 | chr17:37183039-37183083                           | NM_019439:150            | Gabbr1        | INSIDE                 | 1.347                                                        | 1.632                          | 1349.72            | 2202.16            | 2.198                          | 1103.62            | 2425.58            |
| A_68_P25301153 | chr7:95278950-95278994                            | NM_001081414:546295      | Grm5          | INSIDE                 | 1.347                                                        | 2.153                          | 795.64             | 1713.16            | 2.901                          | 698.56             | 2026.33            |
| A_68_P26348588 | chr9:21528254-21528298                            | NM_010700:239            | Ldlr          | INSIDE                 | 1.347                                                        | 4.817                          | 292.19             | 1407.62            | 6.490                          | 322.47             | 2092.75            |
| A_68_P21475550 | chr2:102026219-102026263                          | NM_178886:294            | Ldlrad3       | INSIDE                 | 1.347                                                        | 1.932                          | 3546.53            | 6851.72            | 2.602                          | 2729.63            | 7102.60            |
| A_68_P27969031 | chr11:82721501-82721545                           | NM_145431:375            | Nle1          | INSIDE                 | 1.347                                                        | 1.508                          | 1683.38            | 2538.58            | 2.031                          | 1353.98            | 2749.68            |
| A_68_P29904272 | chr14:112075171-112075215                         | NM_198865:856            | Slitrk5       | INSIDE                 | 1.347                                                        | 2.108                          | 911.50             | 1921.46            | 2.839                          | 781.50             | 2218.40            |
| A_68_P32264678 | chrX:12649125-12649169                            | NM_009481:523            | Usp9x         | INSIDE                 | 1.347                                                        | 2.170                          | 1564.01            | 3393.55            | 2.922                          | 867.52             | 2534.63            |
| A_68_P24992394 | chr7:19856763-19856807                            | NM_009499:419            | Vasp          | INSIDE                 | 1.347                                                        | 1.565                          | 1471.11            | 2302.67            | 2.108                          | 1180.72            | 2489.50            |
| A_68_P24954288 | chr7:6106767-6106811                              | NM_001013012:785         | Zfp787        | INSIDE                 | 1.347                                                        | 1.487                          | 1545.68            | 2297.86            | 2.002                          | 1290.12            | 2582.61            |
| A_68_P24983771 | chr7:17470567-17470612                            | NM_001081655:9924        | Dact3         | INSIDE                 | 1.346                                                        | 2.158                          | 696.75             | 1503.57            | 2.904                          | 694.21             | 2016.01            |
| A_68_P23232037 | chr4:116692073-116692117                          | NM_175135:82             | Eif2b3        | INSIDE                 | 1.346                                                        | 2.096                          | 1100.19            | 2306.35            | 2.822                          | 977.06             | 2757.37            |
| A_68_P28513502 | chr12:70342816-70342860                           | NM_178253:20             | Klhdc1        | INSIDE                 | 1.346                                                        | 2.317                          | 870.11             | 2016.35            | 3.120                          | 700.60             | 2185.64            |
| A_68_P23950022 | chr5:104475737-104475781                          | NM_028794:-271           | Nudt9         | PROMOTER               | 1.346                                                        | 1.393                          | 1131.89            | 1577.11            | 1.875                          | 993.45             | 1862.75            |
| A_68_P28513108 | chr12:70260224-70260268                           | NM_009093:-73            | Rps29         | DIVERGENT_PROMOTER     | 1.346                                                        | 1.580                          | 1551.10            | 2450.61            | 2.127                          | 1334.72            | 2839.08            |
| A_68_P29218721 | chr13:91600629-91600673                           | NM_024186:-51            | Ssbp2         | PROMOTER               | 1.346                                                        | 2.895                          | 1245.08            | 3604.99            | 3.896                          | 1126.61            | 4389.72            |
| A_68_P26805310 | chr9:106724832-106724876                          | NM_001015507:548         | Vprbp         | INSIDE                 | 1.346                                                        | 1.700                          | 1624.83            | 2762.47            | 2.288                          | 1326.87            | 3036.44            |
| A_68_P26552554 | chr9:59139473-59139517                            | NM_028121:116            | Adpgk         | INSIDE                 | 1.345                                                        | 3.966                          | 546.33             | 2166.48            | 5.334                          | 559.45             | 2984.12            |
| A_68_P27843676 | chr11:60352657-60352701                           | NM_172943:1494           | Alkbh5        | INSIDE                 | 1.345                                                        | 1.803                          | 1111.47            | 2003.81            | 2.426                          | 936.19             | 2270.89            |
| A_68_P25587962 | chr7:148480819-148480877                          | NM_007878:2944           | Drd4          | INSIDE                 | 1.345                                                        | 2.296                          | 319.06             | 732.54             | 3.087                          | 247.41             | 763.84             |
| A_68_P25827838 | chr8:46095952-46095996                            | NM_001081286:60413       | Fat1          | INSIDE                 | 1.345                                                        | 2.345                          | 1020.73            | 2393.43            | 3.153                          | 804.20             | 2535.83            |
| A_68_P31949295 | chr19:10315203-10315247                           | NM_001033481:14          | Gm98          | INSIDE                 | 1.345                                                        | 2.226                          | 2762.80            | 6150.31            | 2.993                          | 2332.90            | 6982.74            |
| A_68_P25262701 | chr7:86855086-86855130                            | NM_010626:3964           | Kif7          | INSIDE                 | 1.345                                                        | 4.186                          | 342.03             | 1431.64            | 5.631                          | 321.35             | 1809.63            |
| A_68_P31731695 | chr18:56867197-56867241                           | NM_010721:-248           | Lmnb1         | PROMOTER               | 1.345                                                        | 3.064                          | 1742.74            | 5339.03            | 4.122                          | 1496.70            | 6169.25            |
| A_68_P23164324 | chr4:102787243-102787287                          | NM_001039081:-4730       | Mier1         | PROMOTER               | 1.345                                                        | 2.885                          | 1527.16            | 4405.40            | 3.881                          | 1239.86            | 4811.59            |
| A_68_P31100163 | chr17:25032650-25032694                           | NM_023260:608            | Mrps34        | INSIDE                 | 1.345                                                        | 1.470                          | 829.83             | 1219.61            | 1.977                          | 727.19             | 1437.34            |
| A_68_P27565429 | chr11:5778293-5778337                             | NM_008894:-55            | Pold2         | PROMOTER               | 1.345                                                        | 1.484                          | 6769.19            | 10048.55           | 1.996                          | 4910.58            | 9801.50            |

| ProbeName      | Target position of probe on CpG island microarray | TargetID               | GeneSymbol    | CpG island Description | Ratio of relative methylation (TiO <sub>2</sub> -NP/Vehicle) | Sham group                     |                    |                    | TiO <sub>2</sub> -H group      |                    |                    |
|----------------|---------------------------------------------------|------------------------|---------------|------------------------|--------------------------------------------------------------|--------------------------------|--------------------|--------------------|--------------------------------|--------------------|--------------------|
|                |                                                   |                        |               |                        |                                                              | Relative methylation (Cy5/Cy3) | Cy3 signal (Input) | Cy5 signal (MeDIP) | Relative methylation (Cy5/Cy3) | Cy3 signal (Input) | Cy5 signal (MeDIP) |
| A_68_P29619515 | chr14:56341110-56341154                           | NM_019519:-119         | Rabggt        | PROMOTER               | 1.345                                                        | 1.837                          | 1069.75            | 1965.49            | 2.472                          | 872.78             | 2157.61            |
| A_68_P24428192 | chr6:48544047-48544091                            | NM_001079901:187       | Repin1        | INSIDE                 | 1.345                                                        | 1.620                          | 4432.65            | 7182.98            | 2.180                          | 3673.76            | 8008.99            |
| A_68_P30424513 | chr15:89145595-89145639                           | NM_001081030:126       | Sbf1          | INSIDE                 | 1.345                                                        | 1.646                          | 977.58             | 1608.85            | 2.214                          | 832.48             | 1842.77            |
| A_68_P29145779 | chr13:74487622-74487666                           | NM_023281:44           | Sdha          | INSIDE                 | 1.345                                                        | 1.769                          | 3823.23            | 6762.77            | 2.379                          | 3142.66            | 7474.94            |
| A_68_P32363781 | chrX:45638888-45638932                            | NM_028276:28800        | Utp14a        | DOWNSTREAM             | 1.345                                                        | 4.508                          | 4499.91            | 20285.34           | 6.065                          | 2344.00            | 14216.05           |
| A_68_P28577654 | chr12:81892119-81892163                           | NM_178682:595          | 4933426M11Rik | INSIDE                 | 1.344                                                        | 1.873                          | 402.24             | 753.31             | 2.517                          | 370.66             | 932.86             |
| A_68_P30367720 | chr15:79489229-79489273                           | NM_029407:136          | 4933432B09Rik | INSIDE                 | 1.344                                                        | 1.571                          | 1644.90            | 2584.60            | 2.112                          | 1249.73            | 2639.32            |
| A_68_P31794495 | chr18:68092683-68092727                           | NM_172631:-206         | D18Erd653c    | PROMOTER               | 1.344                                                        | 5.098                          | 868.15             | 4425.93            | 6.852                          | 728.89             | 4994.12            |
| A_68_P30346594 | chr15:76009406-76009450                           | NM_201394:16712        | Plec          | INSIDE                 | 1.344                                                        | 2.929                          | 1053.43            | 3084.97            | 3.935                          | 909.12             | 3577.10            |
| A_68_P21351539 | chr2:76486029-76486073                            | NM_011871:1            | Prkra         | INSIDE                 | 1.344                                                        | 3.292                          | 1449.40            | 4771.65            | 4.424                          | 1126.06            | 4981.41            |
| A_68_P31096042 | chr17:24342530-24342574                           | NM_001163847:-45       | Tbc1d24       | PROMOTER               | 1.344                                                        | 2.127                          | 1128.60            | 2400.42            | 2.859                          | 930.85             | 2661.29            |
| A_68_P32562267 | chrX:98254914-98254958                            | NM_031384:42           | Tex11         | INSIDE                 | 1.344                                                        | 2.185                          | 1466.51            | 3204.23            | 2.937                          | 759.57             | 2230.79            |
| A_68_P28614746 | chr12:88540796-88540840                           | NM_001033475:361       | Tmed8         | INSIDE                 | 1.344                                                        | 1.730                          | 3353.98            | 5801.61            | 2.324                          | 2617.69            | 6083.77            |
| A_68_P21070953 | chr2:25118574-25118618                            | NM_175286:479          | Tprn          | INSIDE                 | 1.344                                                        | 1.619                          | 2392.55            | 3873.83            | 2.176                          | 1987.89            | 4324.89            |
| A_68_P25948524 | chr8:72411743-72411787                            | NM_026818:-473         | Cilp2         | PROMOTER               | 1.343                                                        | 2.962                          | 1181.69            | 3500.32            | 3.979                          | 846.69             | 3368.65            |
| A_68_P23797494 | chr5:73797444-73797488                            | NM_181323:150          | Cwh43         | INSIDE                 | 1.343                                                        | 1.827                          | 1940.94            | 3545.24            | 2.452                          | 1713.72            | 4202.67            |
| A_68_P28553890 | chr12:77518775-77518819                           | NM_001163103:211       | Gm70          | INSIDE                 | 1.343                                                        | 1.890                          | 847.73             | 1602.10            | 2.539                          | 734.25             | 1864.00            |
| A_68_P26585802 | chr9:64949678-64949722                            | NM_020043:399          | Igdc4         | INSIDE                 | 1.343                                                        | 2.113                          | 2532.28            | 5349.72            | 2.838                          | 1862.59            | 5286.39            |
| A_68_P31220004 | chr17:49070978-49071022                           | NM_027452:-906         | Lrfn2         | PROMOTER               | 1.343                                                        | 2.745                          | 3083.98            | 8465.89            | 3.687                          | 2419.79            | 8921.06            |
| A_68_P20897581 | chr1:186635006-186635050                          | NM_001081361:164       | Mosc1         | INSIDE                 | 1.343                                                        | 1.441                          | 1974.58            | 2846.13            | 1.936                          | 1701.70            | 3293.85            |
| A_68_P29591680 | chr14:49685967-49686011                           | NM_144535:-181         | Mudeng        | PROMOTER               | 1.343                                                        | 2.974                          | 782.10             | 2325.97            | 3.994                          | 718.01             | 2868.04            |
| A_68_P22346838 | chr3:95799917-95799961                            | NM_023320:-176         | Plekho1       | PROMOTER               | 1.343                                                        | 3.746                          | 995.77             | 3729.99            | 5.032                          | 1010.56            | 5084.78            |
| A_68_P29177384 | chr13:81850152-81850196                           | NM_001081176:-162      | Polr3g        | DIVERGENT_PROMOTER     | 1.343                                                        | 1.758                          | 1624.81            | 2856.71            | 2.361                          | 1401.46            | 3308.73            |
| A_68_P26701864 | chr9:86774762-86774806                            | NM_013669:423          | Snap91        | INSIDE                 | 1.343                                                        | 2.241                          | 2263.56            | 5071.87            | 3.009                          | 1966.54            | 5707.00            |
| A_68_P26770650 | chr9:100543637-100543681                          | NM_009282:-383         | Stag1         | PROMOTER               | 1.343                                                        | 3.029                          | 521.91             | 1580.85            | 4.067                          | 522.70             | 2125.96            |
| A_68_P23892499 | chr5:92566763-92566807                            | NM_019490:-179         | Uso1          | PROMOTER               | 1.343                                                        | 1.352                          | 3090.94            | 4179.57            | 1.816                          | 2605.61            | 4732.47            |
| A_68_P30665799 | chr16:34745459-34745503                           | ENSMUST00000155268:185 |               | INSIDE                 | 1.343                                                        | 2.697                          | 1401.94            | 3780.96            | 3.622                          | 1146.42            | 4152.87            |
| A_68_P22611613 | chr3:145587280-145587324                          | NM_009740:-39          | Bel10         | PROMOTER               | 1.342                                                        | 1.846                          | 1465.19            | 2704.33            | 2.476                          | 1240.37            | 3071.52            |
| A_68_P28149797 | chr11:114653726-114653770                         | NM_028055:3458         | Btbd17        | INSIDE                 | 1.342                                                        | 1.735                          | 878.36             | 1524.07            | 2.329                          | 704.61             | 1641.20            |
| A_68_P22151285 | chr3:54859248-54859292                            | NM_007628:-293         | Cena1         | PROMOTER               | 1.342                                                        | 2.456                          | 1542.30            | 3787.73            | 3.297                          | 1328.02            | 4378.25            |
| A_68_P24157327 | chr5:144383303-144383347                          | NM_011182:9            | Cyth3         | INSIDE                 | 1.342                                                        | 2.206                          | 732.54             | 1615.92            | 2.961                          | 752.32             | 2227.69            |
| A_68_P32140229 | chr19:45817346-45817390                           | NM_001166361:6         | Fgf8          | INSIDE                 | 1.342                                                        | 2.813                          | 896.25             | 2521.01            | 3.775                          | 850.84             | 3212.33            |
| A_68_P28431895 | chr12:52929741-52929785                           | NM_144788:761          | Hectd1        | INSIDE                 | 1.342                                                        | 2.458                          | 362.51             | 891.20             | 3.299                          | 334.68             | 1104.11            |
| A_68_P25528897 | chr7:138685710-138685754                          | NM_008257:-744         | Hmx3          | PROMOTER               | 1.342                                                        | 4.723                          | 1970.61            | 9306.45            | 6.340                          | 1736.99            | 11012.01           |
| A_68_P25954891 | chr8:73437387-73437431                            | NM_173013:7536         | Mtap1s        | INSIDE                 | 1.342                                                        | 4.074                          | 1656.66            | 6750.02            | 5.469                          | 1363.98            | 7459.09            |
| A_68_P22165653 | chr3:57651276-57651320                            | NM_019410:381          | Pfn2          | INSIDE                 | 1.342                                                        | 2.233                          | 966.34             | 2157.50            | 2.996                          | 881.45             | 2640.61            |
| A_68_P32700062 | chrX:137133645-137133689                          | NM_001077364:1395      | Tsc22d3       | INSIDE                 | 1.342                                                        | 3.679                          | 648.42             | 2385.47            | 4.936                          | 495.78             | 2447.01            |
| A_68_P25957039 | chr8:74005499-74005543                            | NM_001164679:4446      | Ano8          | INSIDE                 | 1.341                                                        | 4.935                          | 612.86             | 3024.27            | 6.617                          | 520.56             | 3444.58            |
| A_68_P32130260 | chr19:44144019-44144063                           | NM_145502:136          | Erlin1        | INSIDE                 | 1.341                                                        | 1.536                          | 3085.79            | 4740.97            | 2.060                          | 2339.82            | 4819.63            |
| A_68_P21052788 | chr2:20890736-20890780                            | NR_033225:258          | Gm13375       | INSIDE                 | 1.341                                                        | 1.874                          | 3948.02            | 7398.32            | 2.513                          | 3064.35            | 7701.04            |
| A_68_P23344527 | chr4:137772352-137772396                          | NM_001122896:-167      | Hp1bp3        | PROMOTER               | 1.341                                                        | 2.571                          | 1612.56            | 4146.00            | 3.449                          | 1364.94            | 4707.40            |
| A_68_P23333958 | chr4:135999081-135999125                          | NM_008309:19664        | Htr1d         | INSIDE                 | 1.341                                                        | 3.546                          | 2662.08            | 9439.13            | 4.754                          | 2030.57            | 9653.41            |
| A_68_P28041933 | chr11:95868905-95868949                           | NM_009951:-1668        | Igf2bp1       | PROMOTER               | 1.341                                                        | 2.490                          | 682.08             | 6202.21            | 3.338                          | 1816.66            | 6064.22            |
| A_68_P28748394 | chr12:113413797-113413841                         | NM_001097621:29400     | Kif26a        | INSIDE                 | 1.341                                                        | 2.524                          | 1151.21            | 2906.20            | 3.385                          | 992.17             | 3358.66            |
| A_68_P25308743 | chr7:96781285-96781329                            | NM_181407:-21          | Me3           | PROMOTER               | 1.341                                                        | 4.545                          | 937.57             | 4261.60            | 6.093                          | 730.00             | 4448.16            |
| A_68_P32778405 | chrX:156575888-156575932                          | NM_008810:358          | Pdha1         | INSIDE                 | 1.341                                                        | 1.893                          | 1655.40            | 3133.51            | 2.538                          | 761.33             | 1932.45            |
| A_68_P20335741 | chr1:72301294-72301338                            | NM_023523:29572        | Peecr         | DOWNSTREAM             | 1.341                                                        | 2.547                          | 2164.50            | 5512.47            | 3.416                          | 1799.10            | 6145.68            |
| A_68_P29194041 | chr13:85429220-85429264                           | NM_145452:-151         | Rasa1         | PROMOTER               | 1.341                                                        | 1.531                          | 2338.75            | 3581.60            | 2.054                          | 2082.23            | 4276.98            |
| A_68_P28145843 | chr11:113928475-113928519                         | NM_172800:-1231        | Sdk2          | PROMOTER               | 1.341                                                        | 1.523                          | 863.20             | 1314.51            | 2.042                          | 722.08             | 1474.48            |
| A_68_P31019379 | chr17:5841808-5841852                             | NM_025664:451          | Snx9          | INSIDE                 | 1.341                                                        | 2.188                          | 1208.94            | 2645.75            | 2.935                          | 1063.24            | 3120.64            |
| A_68_P28307257 | chr12:28026632-28026676                           | NM_009234:929          | Sox11         | INSIDE                 | 1.341                                                        | 2.549                          | 1939.58            | 4944.88            | 3.420                          | 1530.73            | 5234.53            |

| ProbeName      | Target position of probe on CpG island microarray | TargetID                 | GeneSymbol    | CpG island Description | Ratio of relative methylation (TiO <sub>2</sub> -NP/Vehicle) | Sham group                     |                    |                    | TiO <sub>2</sub> -H group      |                    |                    |
|----------------|---------------------------------------------------|--------------------------|---------------|------------------------|--------------------------------------------------------------|--------------------------------|--------------------|--------------------|--------------------------------|--------------------|--------------------|
|                |                                                   |                          |               |                        |                                                              | Relative methylation (Cy5/Cy3) | Cy3 signal (Input) | Cy5 signal (MeDIP) | Relative methylation (Cy5/Cy3) | Cy3 signal (Input) | Cy5 signal (MeDIP) |
| A_68_P21303500 | chr2:68309909-68309953                            | NM_016866:108            | Stk39         | INSIDE                 | 1.341                                                        | 0.485                          | 1005.88            | 488.07             | 0.651                          | 982.39             | 639.18             |
| A_68_P24838523 | chr6:128305849-128305893                          | NM_011657:-1             | Tulp3         | PROMOTER               | 1.341                                                        | 1.922                          | 8087.35            | 15543.80           | 2.577                          | 5603.71            | 14438.80           |
| A_68_P30133054 | chr15:35301504-35301548                           | NM_177151:226            | Vps13b        | INSIDE                 | 1.341                                                        | 1.790                          | 494.98             | 886.08             | 2.400                          | 409.02             | 981.74             |
| A_68_P31836390 | chr18:75503087-75503131                           |                          |               | Unknown                | 1.341                                                        | 2.940                          | 1694.58            | 4981.64            | 3.941                          | 1214.78            | 4787.82            |
| A_68_P30591270 | chr16:21248808-21248852                           | ENSMUST00000152179:48115 |               | INSIDE                 | 1.341                                                        | 1.983                          | 537.39             | 1065.58            | 2.659                          | 443.74             | 1179.77            |
| A_68_P33012182 | chr9_random:57481-57526                           | NR_027950:2811           | 4930526115Rik | DOWNSTREAM             | 1.340                                                        | 1.803                          | 1443.26            | 2602.19            | 2.417                          | 1106.91            | 2675.29            |
| A_68_P25352111 | chr7:104886841-104886885                          | NM_175105:-105           | Aqp11         | PROMOTER               | 1.340                                                        | 1.566                          | 2330.02            | 3648.13            | 2.098                          | 1761.88            | 3695.74            |
| A_68_P20645417 | chr1:138242409-138242453                          | NM_001081360:251         | Camsap111     | INSIDE                 | 1.340                                                        | 1.793                          | 488.83             | 876.41             | 2.402                          | 429.57             | 1031.69            |
| A_68_P20794602 | chr1:167390651-167390695                          | NM_028759:-78            | Deaf6         | DIVERGENT_PROMOTER     | 1.340                                                        | 1.682                          | 1369.42            | 2303.47            | 2.253                          | 1193.27            | 2688.65            |
| A_68_P24218728 | chr6:6813006-6813052                              | NM_010057:-305           | Dlx6          | PROMOTER               | 1.340                                                        | 3.124                          | 463.90             | 1449.06            | 4.184                          | 343.38             | 1436.81            |
| A_68_P23590785 | chr5:34065022-34065066                            | NM_001163216:90          | Fgfr3         | INSIDE                 | 1.340                                                        | 1.500                          | 1441.38            | 2161.81            | 2.010                          | 1196.27            | 2404.98            |
| A_68_P29257132 | chr13:99125852-99125896                           | NM_008242:1675           | Foxd1         | INSIDE                 | 1.340                                                        | 3.574                          | 465.45             | 1663.66            | 4.791                          | 406.12             | 1945.74            |
| A_68_P26803574 | chr9:106367984-106368028                          | NM_001159652:265         | Gpr62         | INSIDE                 | 1.340                                                        | 1.427                          | 3088.38            | 4408.24            | 1.912                          | 2350.54            | 4494.43            |
| A_68_P20453280 | chr1:94998488-94998532                            | NM_001110315:-68         | Kif1a         | PROMOTER               | 1.340                                                        | 4.133                          | 1535.83            | 6347.31            | 5.537                          | 1108.13            | 6136.10            |
| A_68_P31442546 | chr17:91487752-91487796                           | NM_020252:4368           | Nrxn1         | INSIDE                 | 1.340                                                        | 4.217                          | 690.47             | 2911.36            | 5.651                          | 647.49             | 3658.63            |
| A_68_P26824202 | chr9:110434375-110434420                          | NM_001081340:-703        | Setd2         | PROMOTER               | 1.340                                                        | 1.892                          | 467.14             | 883.91             | 2.536                          | 352.86             | 894.77             |
| A_68_P27176492 | chr10:60215582-60215626                           | NM_023596:-74            | Ste29a3       | PROMOTER               | 1.340                                                        | 2.681                          | 5444.55            | 14594.76           | 3.592                          | 3669.82            | 13180.77           |
| A_68_P27682717 | chr11:31269557-31269601                           | NM_011491:483            | Ste2          | INSIDE                 | 1.340                                                        | 1.669                          | 1237.89            | 2066.49            | 2.237                          | 1094.87            | 2449.72            |
| A_68_P32136800 | chr19:45228638-45228682                           | NM_021901:3456           | Tlx1          | INSIDE                 | 1.340                                                        | 3.369                          | 748.09             | 2520.00            | 4.512                          | 686.92             | 3099.60            |
| A_68_P32554230 | chrX:96412300-96412344                            |                          |               | Unknown                | 1.340                                                        | 1.351                          | 1922.99            | 2598.74            | 1.811                          | 994.30             | 1800.28            |
| A_68_P30959225 | chr16:90831355-90831399                           | NM_001199210:273         | 4931408A02Rik | INSIDE                 | 1.339                                                        | 2.098                          | 570.28             | 1196.22            | 2.809                          | 771.21             | 2166.00            |
| A_68_P23882644 | chr5:90795790-90795834                            | NM_030886:-601           | Ankrd17       | PROMOTER               | 1.339                                                        | 1.716                          | 3282.73            | 5632.05            | 2.297                          | 2759.58            | 6339.29            |
| A_68_P26323900 | chr9:15432364-15432408                            | NM_181816:-9             | Ccdc67        | PROMOTER               | 1.339                                                        | 1.842                          | 1156.73            | 2130.38            | 2.466                          | 973.67             | 2401.32            |
| A_68_P26475231 | chr9:45480834-45480878                            | NM_001081270:242481      | Dscaml1       | INSIDE                 | 1.339                                                        | 1.652                          | 1172.34            | 1936.21            | 2.211                          | 914.02             | 2021.00            |
| A_68_P31740998 | chr18:58369127-58369171                           | NM_010181:432            | Fbn2          | INSIDE                 | 1.339                                                        | 1.482                          | 3111.41            | 4611.22            | 1.985                          | 2320.40            | 4605.24            |
| A_68_P28082092 | chr11:102754466-102754510                         | NM_010277:4026           | Gfap          | INSIDE                 | 1.339                                                        | 1.665                          | 1707.38            | 2842.56            | 2.228                          | 1362.45            | 3036.12            |
| A_68_P24226577 | chr6:8460033-8460077                              | NM_133236:459            | Glic1         | INSIDE                 | 1.339                                                        | 2.909                          | 1410.44            | 4102.79            | 3.895                          | 1231.12            | 4795.38            |
| A_68_P29330809 | chr13:112599173-112599217                         | NM_011945:-3             | Map3k1        | PROMOTER               | 1.339                                                        | 0.427                          | 1060.33            | 452.65             | 1.039                          | 1039.45            | 593.98             |
| A_68_P21839352 | chr2:167906373-167906417                          | NM_021409:-109           | Pard6b        | PROMOTER               | 1.339                                                        | 4.844                          | 374.56             | 1814.38            | 6.487                          | 288.36             | 1870.76            |
| A_68_P23398661 | chr4:148473893-148473937                          | NM_019781:7              | Pex14         | INSIDE                 | 1.339                                                        | 1.577                          | 2035.14            | 3209.18            | 2.112                          | 1587.54            | 3353.13            |
| A_68_P32464005 | chrX:70905148-70905192                            | NM_001199351:23          | Pnck          | INSIDE                 | 1.339                                                        | 2.115                          | 1153.88            | 2440.12            | 2.832                          | 575.03             | 1628.51            |
| A_68_P28736915 | chr12:111426863-111426907                         | AK044800:1099            |               | INSIDE                 | 1.339                                                        | 2.545                          | 872.42             | 2220.13            | 3.408                          | 737.57             | 2513.97            |
| A_68_P27281467 | chr10:79634488-79634532                           | NM_027207:-1178          | 1600002K03Rik | PROMOTER               | 1.338                                                        | 3.721                          | 3827.22            | 14240.89           | 4.977                          | 3317.73            | 16513.05           |
| A_68_P30350790 | chr15:76648746-76648790                           | NM_001168288:-168        | Arhgap39      | PROMOTER               | 1.338                                                        | 1.790                          | 1276.86            | 2286.01            | 2.395                          | 1173.22            | 2809.87            |
| A_68_P20331600 | chr1:71603721-71603765                            | NM_026195:13             | Atic          | INSIDE                 | 1.338                                                        | 2.362                          | 3141.08            | 7419.09            | 3.160                          | 2564.54            | 8104.76            |
| A_68_P22551964 | chr3:135086455-135086499                          | NM_025902:-79            | Cisd2         | PROMOTER               | 1.338                                                        | 2.027                          | 266.75             | 540.60             | 2.711                          | 283.56             | 768.81             |
| A_68_P28923671 | chr13:1650063-1650107                             | NM_008239:46             | Foxq1         | INSIDE                 | 1.338                                                        | 1.997                          | 1114.18            | 2225.43            | 2.673                          | 983.38             | 2628.11            |
| A_68_P24449299 | chr6:52184163-52184207                            | NM_008263:754            | Hoxa10        | INSIDE                 | 1.338                                                        | 2.076                          | 455.15             | 945.07             | 2.779                          | 425.78             | 1183.31            |
| A_68_P25092917 | chr7:52661860-52661904                            | NM_010596:553            | Kena7         | INSIDE                 | 1.338                                                        | 2.607                          | 531.73             | 1386.00            | 3.487                          | 497.20             | 1733.82            |
| A_68_P24992159 | chr7:19813899-19813943                            | NM_207525:183            | Opa3          | INSIDE                 | 1.338                                                        | 1.911                          | 2633.79            | 5033.31            | 2.558                          | 2126.72            | 5439.79            |
| A_68_P30346607 | chr15:76010905-76010949                           | NM_201394:15214          | Plec          | INSIDE                 | 1.338                                                        | 8.869                          | 2737.52            | 24278.32           | 11.865                         | 2149.78            | 25506.15           |
| A_68_P28160474 | chr11:116485631-116485675                         | NM_001167680:-86         | Rhbd12        | PROMOTER               | 1.338                                                        | 3.174                          | 5177.67            | 16434.58           | 4.248                          | 3799.05            | 16139.05           |
| A_68_P30368252 | chr15:79573047-79573091                           | NM_001205345:-102        | Sun2          | PROMOTER               | 1.338                                                        | 2.064                          | 1709.94            | 3529.13            | 2.762                          | 1574.09            | 4347.12            |
| A_68_P32672209 | chrX:131010003-131010047                          | NM_028958:1005           | Taf7l         | INSIDE                 | 1.338                                                        | 1.414                          | 2478.92            | 3505.23            | 1.892                          | 1251.69            | 2368.81            |
| A_68_P31335267 | chr17:71948102-71948146                           | NR_015549:-23            | Trmt61b       | PROMOTER               | 1.338                                                        | 2.084                          | 1345.43            | 2803.78            | 2.789                          | 1114.42            | 3107.82            |
| A_68_P30125733 | chr15:33617621-33617665                           | NM_001085421:-4          | Tspyl5        | PROMOTER               | 1.338                                                        | 2.298                          | 2155.98            | 4954.41            | 3.075                          | 1620.37            | 4982.26            |
| A_68_P28736904 | chr12:111425727-111425771                         | AK044800:-37             |               | DIVERGENT_PROMOTER     | 1.338                                                        | 3.048                          | 1148.32            | 3500.06            | 4.077                          | 1097.52            | 4474.22            |
| A_68_P31458282 | chr18:3383392-3383436                             | NM_029402:192            | Cul2          | INSIDE                 | 1.337                                                        | 3.211                          | 2117.97            | 6800.27            | 4.292                          | 1751.61            | 7517.97            |
| A_68_P22520451 | chr3:129236724-129236768                          | NM_130450:1443           | Elovl6        | INSIDE                 | 1.337                                                        | 4.256                          | 616.20             | 2622.36            | 5.692                          | 541.72             | 3083.33            |
| A_68_P21834174 | chr2:167014089-167014133                          | NM_008420:189            | Kenb1         | INSIDE                 | 1.337                                                        | 1.753                          | 524.44             | 919.24             | 2.344                          | 527.04             | 1235.51            |
| A_68_P27453319 | chr10:111708984-111709028                         | NM_001025581:828         | Kenc2         | INSIDE                 | 1.337                                                        | 2.028                          | 1498.18            | 3038.83            | 2.713                          | 1243.51            | 3373.36            |

| ProbeName      | Target position of probe on CpG island microarray | TargetID               | GeneSymbol    | CpG island Description | Ratio of relative methylation (TiO <sub>2</sub> -NP/Vehicle) | Sham group                     |                    |                    | TiO <sub>2</sub> -H group      |                    |                    |
|----------------|---------------------------------------------------|------------------------|---------------|------------------------|--------------------------------------------------------------|--------------------------------|--------------------|--------------------|--------------------------------|--------------------|--------------------|
|                |                                                   |                        |               |                        |                                                              | Relative methylation (Cy5/Cy3) | Cy3 signal (Input) | Cy5 signal (MeDIP) | Relative methylation (Cy5/Cy3) | Cy3 signal (Input) | Cy5 signal (MeDIP) |
| A_68_P20127130 | chr1:32229462-32229506                            | NM_133235:-166         | Khdrbs2       | PROMOTER               | 1.337                                                        | 2.312                          | 2254.58            | 5212.73            | 3.091                          | 1987.15            | 6141.96            |
| A_68_P26133049 | chr8:107850154-107850198                          | NM_177449:0            | Lrre29        | INSIDE                 | 1.337                                                        | 3.266                          | 1227.99            | 4010.66            | 4.365                          | 1021.93            | 4461.19            |
| A_68_P30777937 | chr16:55822273-55822317                           | NM_001159394:-43       | Nfkfbz        | PROMOTER               | 1.337                                                        | 2.175                          | 2129.70            | 4632.62            | 2.908                          | 1709.94            | 4972.36            |
| A_68_P25779457 | chr8:36439788-36439832                            | NM_177741:1016         | Ppp1r3b       | INSIDE                 | 1.337                                                        | 2.316                          | 504.42             | 1168.21            | 3.097                          | 408.12             | 1264.11            |
| A_68_P29267242 | chr13:100878272-100878316                         | NM_011353:321          | Serf1         | INSIDE                 | 1.337                                                        | 1.446                          | 1531.30            | 2214.12            | 1.934                          | 1407.30            | 2721.17            |
| A_68_P28875421 | chr13:22037070-22037115                           | NM_183014:130          | Zfp184        | INSIDE                 | 1.337                                                        | 1.661                          | 896.06             | 1488.71            | 2.221                          | 746.96             | 1658.69            |
| A_68_P21851419 | chr2:169956951-169956995                          | NM_001033299:-252      | Zfp217        | PROMOTER               | 1.337                                                        | 1.763                          | 975.08             | 1719.13            | 2.357                          | 860.78             | 2028.53            |
| A_68_P23296944 | chr4:129178242-129178286                          | NM_001085491:9831      | 1700125D06Rik | DOWNSTREAM             | 1.336                                                        | 3.582                          | 2075.79            | 7434.50            | 4.785                          | 1806.94            | 8646.07            |
| A_68_P28574822 | chr12:81361237-81361281                           | NM_134156:100          | Actn1         | INSIDE                 | 1.336                                                        | 3.621                          | 938.72             | 3399.35            | 4.840                          | 864.72             | 4185.02            |
| A_68_P25024597 | chr7:29747515-29747559                            | NM_021895:-237         | Actn4         | PROMOTER               | 1.336                                                        | 1.478                          | 852.53             | 1259.82            | 1.975                          | 795.54             | 1571.06            |
| A_68_P20872222 | chr1:181733328-181733372                          | NM_026375:796          | Ahctf1        | INSIDE                 | 1.336                                                        | 2.979                          | 486.39             | 1448.99            | 3.980                          | 359.47             | 1430.54            |
| A_68_P30379106 | chr15:81525333-81525377                           | NM_001164320:2363      | Chadl         | INSIDE                 | 1.336                                                        | 4.624                          | 1302.11            | 6020.74            | 6.176                          | 1129.61            | 6976.41            |
| A_68_P31227865 | chr17:50432360-50432404                           | NM_010021:542          | Dazl          | INSIDE                 | 1.336                                                        | 2.581                          | 370.51             | 956.21             | 3.449                          | 302.26             | 1042.39            |
| A_68_P31161462 | chr17:36016904-36016948                           | NM_026987:204          | Dhx16         | INSIDE                 | 1.336                                                        | 4.865                          | 710.65             | 3457.34            | 6.500                          | 533.57             | 3468.25            |
| A_68_P27937920 | chr11:77307416-77307460                           | NM_001004144:525       | Git1          | INSIDE                 | 1.336                                                        | 1.872                          | 3343.68            | 6260.74            | 2.501                          | 2574.44            | 6438.23            |
| A_68_P29141936 | chr13:73901069-73901113                           | NM_011390:-54          | Slc12a7       | PROMOTER               | 1.336                                                        | 5.352                          | 1349.31            | 7222.09            | 7.153                          | 1152.16            | 8241.44            |
| A_68_P27325554 | chr10:87922543-87922587                           | NM_011517:233          | Syep3         | INSIDE                 | 1.336                                                        | 3.252                          | 1820.93            | 5920.98            | 4.345                          | 1391.20            | 6045.37            |
| A_68_P20680088 | chr1:145624700-145624744                          | NM_001159866:315       | Uchl5         | INSIDE                 | 1.336                                                        | 1.508                          | 818.20             | 1233.96            | 2.016                          | 654.47             | 1319.14            |
| A_68_P30356301 | chr15:77688150-77688194                           |                        |               | Unknown                | 1.336                                                        | 1.916                          | 1408.52            | 2698.29            | 2.560                          | 1253.57            | 3209.38            |
| A_68_P22747701 | chr4:14858053-14858097                            | ENSMUST00000152024:252 |               |                        | 1.336                                                        | 1.862                          | 1307.55            | 2434.08            | 2.487                          | 1130.94            | 2812.33            |
| A_68_P21092002 | chr2:28438501-28438545                            | NM_148928:277          | Gtf3e5        | INSIDE                 | 1.335                                                        | 3.024                          | 1189.90            | 3598.21            | 4.036                          | 961.92             | 3882.22            |
| A_68_P21338754 | chr2:74520144-74520188                            | NM_008273:-283         | Hoxd11        | PROMOTER               | 1.335                                                        | 4.895                          | 964.44             | 4721.07            | 6.534                          | 934.03             | 6103.35            |
| A_68_P21666845 | chr2:136941868-136941912                          | NM_013822:366          | Jag1          | INSIDE                 | 1.335                                                        | 1.437                          | 1804.87            | 2592.90            | 1.918                          | 1445.41            | 2772.97            |
| A_68_P23120719 | chr4:94719459-94719503                            | NM_010591:-567         | Jun           | PROMOTER               | 1.335                                                        | 2.009                          | 7357.97            | 14785.66           | 2.682                          | 5167.60            | 13857.99           |
| A_68_P24862701 | chr6:134591261-134591305                          | NM_026371:325          | Loh12cr1      | INSIDE                 | 1.335                                                        | 2.315                          | 1231.51            | 2851.23            | 3.091                          | 1058.55            | 3271.87            |
| A_68_P31100078 | chr17:25023059-25023105                           | NM_011956:213          | Nubp2         | INSIDE                 | 1.335                                                        | 2.560                          | 1166.37            | 2985.90            | 3.419                          | 923.21             | 3156.12            |
| A_68_P27808204 | chr11:53914341-53914385                           | NM_001136076:-63       | P4ha2         | PROMOTER               | 1.335                                                        | 2.153                          | 739.34             | 1592.04            | 2.874                          | 676.91             | 1945.71            |
| A_68_P22309854 | chr3:87572957-87573001                            | NM_001032413:-103      | Pear1         | PROMOTER               | 1.335                                                        | 2.770                          | 1235.72            | 3422.55            | 3.697                          | 1098.60            | 4061.88            |
| A_68_P25169315 | chr7:69608941-69608985                            | NM_013788:434          | Peg12         | INSIDE                 | 1.335                                                        | 2.966                          | 433.72             | 1286.34            | 3.961                          | 376.26             | 1490.24            |
| A_68_P25024908 | chr7:29804801-29804845                            | NM_009109:105348       | Ryr1          | INSIDE                 | 1.335                                                        | 1.502                          | 652.69             | 980.15             | 2.004                          | 893.28             | 1790.28            |
| A_68_P25735809 | chr8:28089115-28089159                            | NM_001101502:1329      | Zfp703        | INSIDE                 | 1.335                                                        | 2.225                          | 15940.06           | 35462.73           | 2.970                          | 13259.88           | 39380.86           |
| A_68_P20293905 | chr1:64737459-64737503                            | NR_038009:-247         | 2810408I11Rik | DIVERGENT_PROMOTER     | 1.334                                                        | 4.130                          | 700.14             | 2891.44            | 5.509                          | 590.88             | 3254.91            |
| A_68_P21768923 | chr2:155833524-155833568                          | NM_001145351:-3383     | 6430550D23Rik | PROMOTER               | 1.334                                                        | 1.486                          | 1918.07            | 2850.26            | 1.982                          | 1568.36            | 3108.55            |
| A_68_P23352771 | chr4:139130470-139130514                          | NM_001205173:-142      | Iffo2         | PROMOTER               | 1.334                                                        | 1.834                          | 5321.49            | 9762.17            | 2.446                          | 3868.28            | 9463.00            |
| A_68_P25503042 | chr7:134072295-134072339                          | NM_172747:-76          | Kctd13        | PROMOTER               | 1.334                                                        | 2.072                          | 2909.54            | 6027.35            | 2.763                          | 2401.59            | 6636.46            |
| A_68_P28052177 | chr11:97560932-97560976                           | NM_001163307:-256      | Pegf2         | PROMOTER               | 1.334                                                        | 3.014                          | 323.96             | 976.35             | 4.021                          | 264.30             | 1062.62            |
| A_68_P31257082 | chr17:56724139-56724183                           | NM_001029979:-154      | Safb2         | DIVERGENT_PROMOTER     | 1.334                                                        | 2.397                          | 1326.14            | 3178.53            | 3.197                          | 1326.10            | 4239.77            |
| A_68_P26885415 | chr9:121672022-121672066                          | NM_001166644:2894      | Zfp651        | INSIDE                 | 1.334                                                        | 3.001                          | 367.72             | 1103.34            | 4.002                          | 323.52             | 1294.84            |
| A_68_P25264340 | chr7:87172009-87172053                            | NM_175433:917          | Zfp710        | INSIDE                 | 1.334                                                        | 2.542                          | 1323.19            | 3363.81            | 3.391                          | 1157.96            | 3926.24            |
| A_68_P32257885 | chrX:11241764-11241808                            |                        |               | Unknown                | 1.334                                                        | 1.843                          | 2993.62            | 5515.87            | 2.458                          | 2032.34            | 4995.40            |
| A_68_P28731504 | chr12:110272212-110272256                         | NM_001163175:34193     | Begain        | INSIDE                 | 1.333                                                        | 2.767                          | 351.11             | 971.62             | 3.690                          | 331.43             | 1222.84            |
| A_68_P26880510 | chr9:120843613-120843657                          | NM_001165902:939       | Ctnnb1        | INSIDE                 | 1.333                                                        | 2.029                          | 1273.94            | 2584.83            | 2.705                          | 1019.34            | 2757.35            |
| A_68_P26512426 | chr9:51771455-51771499                            | NM_007996:162          | Fdx1          | INSIDE                 | 1.333                                                        | 2.638                          | 1623.96            | 4284.49            | 3.517                          | 1384.14            | 4868.40            |
| A_68_P28923686 | chr13:31651815-31651859                           | NM_008239:1798         | Foxq1         | INSIDE                 | 1.333                                                        | 2.485                          | 1040.59            | 2586.20            | 3.312                          | 804.99             | 2785.69            |
| A_68_P26035037 | chr8:89997425-89997469                            | NR_033430:736          | Gm2694        | INSIDE                 | 1.333                                                        | 3.330                          | 422.27             | 1406.31            | 4.441                          | 364.08             | 1616.82            |
| A_68_P21902331 | chr2:179960697-179960741                          | NM_001081171:-154      | Lama5         | PROMOTER               | 1.333                                                        | 1.805                          | 1144.46            | 2065.74            | 2.406                          | 1145.28            | 2755.15            |
| A_68_P25010203 | chr7:26181112-26181156                            | NM_010719:-128         | Lipe          | PROMOTER               | 1.333                                                        | 2.248                          | 2863.62            | 6436.32            | 2.997                          | 2214.24            | 6635.82            |
| A_68_P20241002 | chr1:55294197-55294241                            | NM_175439:198          | Mars2         | INSIDE                 | 1.333                                                        | 2.175                          | 1906.21            | 4145.37            | 2.898                          | 1719.83            | 4984.92            |
| A_68_P31553001 | chr18:23198592-23198636                           | NM_001161483:-1450     | Nol4          | PROMOTER               | 1.333                                                        | 1.905                          | 955.04             | 1819.39            | 2.539                          | 751.14             | 1907.10            |
| A_68_P21114136 | chr2:32092306-32092350                            | NM_145145:126          | Pomt1         | INSIDE                 | 1.333                                                        | 1.860                          | 1785.50            | 3321.77            | 2.480                          | 1471.03            | 3648.84            |
| A_68_P24117360 | chr5:136164660-136164704                          | NM_008898:-401         | Por           | PROMOTER               | 1.333                                                        | 1.400                          | 2742.36            | 3840.04            | 1.867                          | 2286.08            | 4267.59            |



| ProbeName      | Target position of probe on CpG island microarray | TargetID                | GeneSymbol    | CpG island Description | Ratio of relative methylation (TiO <sub>2</sub> -NP/Vehicle) | Sham group                     |                    |                    | TiO <sub>2</sub> -H group      |                    |                    |
|----------------|---------------------------------------------------|-------------------------|---------------|------------------------|--------------------------------------------------------------|--------------------------------|--------------------|--------------------|--------------------------------|--------------------|--------------------|
|                |                                                   |                         |               |                        |                                                              | Relative methylation (Cy5/Cy3) | Cy3 signal (Input) | Cy5 signal (MeDIP) | Relative methylation (Cy5/Cy3) | Cy3 signal (Input) | Cy5 signal (MeDIP) |
| A_68_P30380957 | chr15:81846273-81846317                           | NM_134095:276           | Pppdc2        | INSIDE                 | 1.333                                                        | 2.057                          | 2296.06            | 4724.11            | 2.743                          | 1977.13            | 5423.42            |
| A_68_P25228919 | chr7:80554204-80554248                            | NM_177740:33821         | Rgma          | INSIDE                 | 1.333                                                        | 3.125                          | 1593.04            | 4978.61            | 4.164                          | 1257.76            | 5237.77            |
| A_68_P30575781 | chr16:17803149-17803193                           | NM_153790:5796          | Scarf2        | INSIDE                 | 1.333                                                        | 2.172                          | 1337.19            | 2904.51            | 2.895                          | 1270.17            | 3677.27            |
| A_68_P29507582 | chr14:31529438-31529482                           | NM_001166532:660        | Sfmbt1        | INSIDE                 | 1.333                                                        | 2.054                          | 2040.89            | 4192.46            | 2.737                          | 1920.06            | 5255.83            |
| A_68_P24120070 | chr5:136708234-136708278                          | NM_018825:12517         | Sh2b2         | INSIDE                 | 1.333                                                        | 2.738                          | 276.24             | 756.47             | 3.650                          | 197.08             | 719.35             |
| A_68_P30425529 | chr15:89329556-89329600                           | NM_021423:-709          | Shank3        | PROMOTER               | 1.333                                                        | 3.568                          | 1757.17            | 6269.47            | 4.757                          | 1409.19            | 6703.29            |
| A_68_P23187164 | chr4:106585031-106585075                          | NM_023672:978           | Ssbp3         | INSIDE                 | 1.333                                                        | 2.840                          | 979.04             | 2780.22            | 3.785                          | 811.06             | 3069.92            |
| A_68_P30385309 | chr15:82729893-82729937                           | NR_027799:-1023         | Tbpg3         | PROMOTER               | 1.333                                                        | 2.843                          | 332.55             | 945.29             | 3.790                          | 351.26             | 1331.45            |
| A_68_P30572943 | chr16:17277156-17277200                           | NM_177473:786           | Tmem191c      | INSIDE                 | 1.333                                                        | 1.574                          | 2471.21            | 3889.63            | 2.098                          | 2174.32            | 4562.63            |
| A_68_P28696867 | chr12:104563817-104563863                         | NM_023049:30371         | Asb2          | INSIDE                 | 1.332                                                        | 6.609                          | 655.44             | 4332.12            | 8.807                          | 474.02             | 4174.57            |
| A_68_P26470343 | chr9:44728440-44728484                            | NM_013795:363           | Atp5l         | INSIDE                 | 1.332                                                        | 0.502                          | 1215.35            | 610.51             | 0.669                          | 1031.13            | 690.09             |
| A_68_P22523145 | chr3:129672979-129673023                          | NM_025779:124           | Ccdc109b      | INSIDE                 | 1.332                                                        | 1.964                          | 752.91             | 1479.05            | 2.616                          | 688.48             | 1801.39            |
| A_68_P31607790 | chr18:33623473-33623517                           | NM_001109989:-93        | DOH4S114      | PROMOTER               | 1.332                                                        | 1.825                          | 540.07             | 985.73             | 2.430                          | 490.14             | 1191.28            |
| A_68_P20422165 | chr1:90102210-90102254                            | NM_008299:91            | Dnajb3        | INSIDE                 | 1.332                                                        | 2.473                          | 690.38             | 1707.28            | 3.295                          | 585.58             | 1929.29            |
| A_68_P26658159 | chr9:77956440-77956484                            | NM_023605:1             | Fbxo9         | INSIDE                 | 1.332                                                        | 3.803                          | 1019.33            | 3876.55            | 5.066                          | 912.99             | 4625.60            |
| A_68_P20264189 | chr1:59539520-59539564                            | NM_008057:552           | Fzd7          | INSIDE                 | 1.332                                                        | 1.795                          | 1363.25            | 2446.54            | 2.390                          | 1114.11            | 2663.22            |
| A_68_P27500269 | chr10:120335461-120335505                         | NM_177092:545           | Msrb3         | INSIDE                 | 1.332                                                        | 1.914                          | 1787.68            | 3421.72            | 2.550                          | 1542.80            | 3934.06            |
| A_68_P21722728 | chr2:147009701-147009745                          | NR_030769:-96           | Nkx2-2as      | PROMOTER               | 1.332                                                        | 1.500                          | 810.16             | 1214.93            | 1.997                          | 767.80             | 1533.39            |
| A_68_P31682250 | chr18:47528856-47528900                           | NM_018744:-356          | Sema6a        | PROMOTER               | 1.332                                                        | 1.808                          | 935.61             | 1691.99            | 2.409                          | 814.14             | 1961.36            |
| A_68_P24046794 | chr5:122286634-122286678                          | NM_008507:154           | Sh2b3         | INSIDE                 | 1.332                                                        | 2.434                          | 950.55             | 2313.86            | 3.242                          | 834.37             | 2704.65            |
| A_68_P23238480 | chr4:117807649-117807693                          | NM_001161774:-151       | St3gal3       | PROMOTER               | 1.332                                                        | 2.806                          | 2923.17            | 8200.99            | 3.736                          | 2211.63            | 8261.91            |
| A_68_P25576308 | chr7:146374357-146374401                          | NM_021302:15            | Stk32c        | INSIDE                 | 1.332                                                        | 2.699                          | 993.13             | 2680.68            | 3.596                          | 915.61             | 3292.55            |
| A_68_P31098879 | chr17:24806802-24806846                           | NM_183149:128           | Zfp598        | INSIDE                 | 1.332                                                        | 0.419                          | 1813.18            | 759.99             | 0.558                          | 1540.66            | 860.45             |
| A_68_P26160580 | chr8:112603835-112603879                          | NM_175480:223           | Zfp612        | INSIDE                 | 1.332                                                        | 1.437                          | 2261.02            | 3248.90            | 1.914                          | 1180.82            | 3542.32            |
| A_68_P30821643 | chr16:64770368-64770412                           | NM_026273:375           | 4930453N24Rik | INSIDE                 | 1.331                                                        | 1.725                          | 1018.18            | 1756.51            | 2.296                          | 832.14             | 1910.38            |
| A_68_P23602808 | chr5:36100579-36100623                            | NM_001177696:72         | Ablim2        | INSIDE                 | 1.331                                                        | 1.664                          | 718.64             | 1195.51            | 2.214                          | 653.94             | 1447.58            |
| A_68_P31939551 | chr19:7456653-7456699                             | NM_001033139:840        | Al846148      | INSIDE                 | 1.331                                                        | 2.226                          | 646.62             | 1439.53            | 2.964                          | 578.22             | 1713.62            |
| A_68_P24593643 | chr6:83406064-83406108                            | NR_028382:14338         | B230319C09Rik | DOWNSTREAM             | 1.331                                                        | 1.961                          | 1529.67            | 2999.72            | 2.611                          | 1309.39            | 2999.70            |
| A_68_P32464345 | chrX:70961700-70961744                            | NM_012060:-208          | Bcap31        | DIVERGENT_PROMOTER     | 1.331                                                        | 1.867                          | 2442.66            | 4561.11            | 2.485                          | 1185.74            | 2946.87            |
| A_68_P27360779 | chr10:94151657-94151701                           | NM_029852:144           | Ccdc41        | INSIDE                 | 1.331                                                        | 1.374                          | 1423.70            | 1955.77            | 1.828                          | 1289.37            | 2357.44            |
| A_68_P32096195 | chr19:37625247-37625291                           | NM_175353:361           | Exoc6         | INSIDE                 | 1.331                                                        | 2.964                          | 518.11             | 1535.82            | 3.946                          | 585.86             | 2311.77            |
| A_68_P26228654 | chr8:124277231-124277275                          | NM_020605:22794         | Jph3          | INSIDE                 | 1.331                                                        | 2.378                          | 754.46             | 1794.34            | 3.166                          | 785.56             | 2486.72            |
| A_68_P31515588 | chr18:15222716-15222760                           | NM_001142731:-647       | Ketd1         | PROMOTER               | 1.331                                                        | 3.505                          | 1556.81            | 5457.17            | 4.667                          | 1481.41            | 6913.96            |
| A_68_P28457453 | chr12:57636766-57636810                           | NM_001146198:-695       | Nkx2-1        | PROMOTER               | 1.331                                                        | 2.333                          | 6807.31            | 15879.70           | 3.105                          | 5163.41            | 16032.11           |
| A_68_P20870654 | chr1:181447812-181447856                          | NM_027188:300           | Smyd3         | INSIDE                 | 1.331                                                        | 1.548                          | 4397.46            | 6807.52            | 2.060                          | 3135.10            | 6459.42            |
| A_68_P21823565 | chr2:165213622-165213666                          | NM_178411:115           | Zfp334        | INSIDE                 | 1.331                                                        | 1.801                          | 1360.15            | 2449.20            | 2.397                          | 1128.76            | 2705.35            |
| A_68_P25504795 | chr7:134398033-134398077                          | NM_177362:10015         | Zfp771        | INSIDE                 | 1.331                                                        | 2.801                          | 722.05             | 2022.40            | 3.729                          | 710.19             | 2648.52            |
| A_68_P24183980 | chr5:150040675-150040719                          | AK155259:18562          |               | DOWNSTREAM             | 1.331                                                        | 2.303                          | 304.15             | 700.36             | 3.066                          | 269.40             | 825.98             |
| A_68_P27111542 | chr10:45205927-45205971                           | ENSMUST00000099847:-365 |               | PROMOTER               | 1.331                                                        | 1.624                          | 2466.59            | 4006.89            | 2.162                          | 2163.36            | 4678.11            |
| A_68_P25027733 | chr7:30304368-30304412                            | ENSMUST00000141713:167  |               | INSIDE                 | 1.331                                                        | 2.366                          | 489.83             | 1159.16            | 3.149                          | 411.67             | 1296.37            |
| A_68_P21110673 | chr2:31544152-31544196                            | NM_001112703:99         | Abl1          | INSIDE                 | 1.330                                                        | 2.593                          | 1393.98            | 3614.26            | 3.447                          | 1188.79            | 4097.93            |
| A_68_P23541452 | chr5:23893732-23893776                            | NM_001002897:4207       | Atg9b         | INSIDE                 | 1.330                                                        | 1.663                          | 494.34             | 822.07             | 2.212                          | 416.14             | 920.65             |
| A_68_P27828609 | chr11:57822259-57822303                           | NM_028451:-285          | Larp1         | PROMOTER               | 1.330                                                        | 2.175                          | 1919.17            | 4173.64            | 2.893                          | 1632.70            | 4723.18            |
| A_68_P31938322 | chr19:7240010-7240054                             | NM_134147:108775        | Macrodl       | INSIDE                 | 1.330                                                        | 3.244                          | 197.20             | 639.76             | 4.316                          | 156.80             | 676.76             |
| A_68_P29224476 | chr13:93300612-93300656                           | NM_173392:131           | Zfyve16       | INSIDE                 | 1.330                                                        | 1.564                          | 1215.33            | 1900.52            | 2.079                          | 1033.25            | 2148.53            |
| A_68_P27921684 | chr11:74463331-74463375                           | NM_001081158:356        | 1300001101Rik | INSIDE                 | 1.329                                                        | 2.131                          | 649.07             | 1383.17            | 2.833                          | 529.41             | 1499.69            |
| A_68_P20861822 | chr1:179726539-179726583                          | NM_007422:80            | Adss          | INSIDE                 | 1.329                                                        | 1.576                          | 1110.22            | 1749.31            | 2.094                          | 852.39             | 1785.30            |
| A_68_P26236514 | chr8:125394402-125394446                          | NM_007662:22151         | Cdh15         | DOWNSTREAM             | 1.329                                                        | 2.720                          | 1831.61            | 4982.14            | 3.614                          | 1550.16            | 5602.88            |
| A_68_P26695698 | chr9:85642712-85642756                            | NM_001081282:207        | Ibtik         | INSIDE                 | 1.329                                                        | 4.457                          | 487.82             | 2174.07            | 5.924                          | 537.96             | 3186.74            |
| A_68_P28290824 | chr12:25336101-25336145                           | NM_178357:-113          | Klf11         | PROMOTER               | 1.329                                                        | 2.060                          | 906.85             | 1867.82            | 2.737                          | 773.95             | 2118.22            |
| A_68_P24591361 | chr6:83037609-83037653                            | NM_010692:1272          | Lbx2          | INSIDE                 | 1.329                                                        | 2.250                          | 737.02             | 1658.65            | 2.991                          | 627.50             | 1877.06            |

| ProbeName      | Target position of probe on CpG island microarray | TargetID                | GeneSymbol    | CpG island Description | Ratio of relative methylation (TiO <sub>2</sub> -NP/Vehicle) | Sham group                     |                    |                    | TiO <sub>2</sub> -H group      |                    |                    |
|----------------|---------------------------------------------------|-------------------------|---------------|------------------------|--------------------------------------------------------------|--------------------------------|--------------------|--------------------|--------------------------------|--------------------|--------------------|
|                |                                                   |                         |               |                        |                                                              | Relative methylation (Cy5/Cy3) | Cy3 signal (Input) | Cy5 signal (MeDIP) | Relative methylation (Cy5/Cy3) | Cy3 signal (Input) | Cy5 signal (MeDIP) |
| A_68_P31784509 | chr18:66162457-66162501                           | NM_027400:-189          | Lman1         | PROMOTER               | 1.329                                                        | 1.864                          | 2581.80            | 4812.40            | 2.477                          | 1946.21            | 4820.43            |
| A_68_P21747603 | chr2:151918965-151919009                          | NM_001160410:11722      | Sert2         | INSIDE                 | 1.329                                                        | 1.802                          | 874.71             | 1576.53            | 2.394                          | 735.01             | 1759.97            |
| A_68_P26365997 | chr9:25060616-25060660                            | NM_001205367:599        | Septin7       | INSIDE                 | 1.329                                                        | 2.708                          | 1613.18            | 4368.05            | 3.598                          | 1635.78            | 5885.79            |
| A_68_P23991345 | chr5:112736931-112736975                          | NM_009419:31226         | Trpst2        | INSIDE                 | 1.329                                                        | 2.709                          | 958.79             | 2597.34            | 3.600                          | 790.67             | 2846.33            |
| A_68_P27889184 | chr11:68213153-68213197                           | ENSMUST00000108674:1151 |               | INSIDE                 | 1.329                                                        | 2.210                          | 6659.31            | 14716.33           | 2.936                          | 5271.16            | 15476.48           |
| A_68_P30425032 | chr15:89240650-89240694                           | NM_001162882:22         | 1700007E06Rik | INSIDE                 | 1.328                                                        | 3.837                          | 641.17             | 2459.90            | 5.097                          | 593.91             | 3026.98            |
| A_68_P31304171 | chr17:66426811-66426855                           | NM_001025572:-446       | Ankrd12       | PROMOTER               | 1.328                                                        | 1.740                          | 1184.72            | 2060.95            | 2.311                          | 1028.02            | 2375.55            |
| A_68_P32111327 | chr19:40905758-40905802                           | NM_172839:12            | Cenj          | INSIDE                 | 1.328                                                        | 1.806                          | 337.55             | 609.64             | 2.399                          | 338.98             | 813.34             |
| A_68_P32054108 | chr19:29722693-29722737                           | NM_001081213:196        | Ermp1         | INSIDE                 | 1.328                                                        | 1.378                          | 2497.19            | 3442.12            | 1.830                          | 2094.02            | 3833.04            |
| A_68_P24518615 | chr6:66846390-66846434                            | NM_001177558:-472       | Gngl2         | PROMOTER               | 1.328                                                        | 3.354                          | 1881.29            | 6309.00            | 4.454                          | 1803.62            | 8032.63            |
| A_68_P20939666 | chr1:193542578-193542622                          | NM_001134829:327        | Lpgat1        | INSIDE                 | 1.328                                                        | 2.532                          | 1456.79            | 3689.26            | 3.363                          | 1359.30            | 4571.15            |
| A_68_P26017625 | chr8:86535356-86535400                            | NR_035431:154           | Mir1199       | DOWNSTREAM             | 1.328                                                        | 2.383                          | 289.76             | 690.47             | 3.164                          | 247.17             | 782.08             |
| A_68_P27708863 | chr11:35648179-35648223                           | NM_025936:-170          | Rars          | PROMOTER               | 1.328                                                        | 2.661                          | 1297.55            | 3453.16            | 3.534                          | 1109.70            | 3922.11            |
| A_68_P27277984 | chr10:79100620-79100664                           | NM_001024539:21         | Shc2          | INSIDE                 | 1.328                                                        | 2.265                          | 1849.31            | 4188.43            | 3.008                          | 1539.84            | 4632.16            |
| A_68_P27985585 | chr11:85651342-85651386                           | NM_009324:5248          | Tbx2          | INSIDE                 | 1.328                                                        | 2.422                          | 537.79             | 1302.68            | 3.218                          | 535.62             | 1723.58            |
| A_68_P23317102 | chr4:132894698-132894742                          | NM_199306:510           | Wdtd1         | INSIDE                 | 1.328                                                        | 2.257                          | 1980.31            | 4469.28            | 2.997                          | 1700.34            | 5095.96            |
| A_68_P31054979 | chr17:13184902-13184946                           | NM_001113533:201        | Wtap          | INSIDE                 | 1.328                                                        | 1.592                          | 480.14             | 764.31             | 2.113                          | 490.52             | 1036.67            |
| A_68_P31839436 | chr18:75979599-75979603                           | NM_145356:-251          | Zbtb7c        | PROMOTER               | 1.328                                                        | 3.054                          | 1281.61            | 3913.84            | 4.056                          | 1122.07            | 4551.36            |
| A_68_P21863764 | chr2:172171330-172171374                          | NM_025912:276           | 2010011120Rik | INSIDE                 | 1.327                                                        | 2.582                          | 980.11             | 2530.58            | 3.425                          | 836.76             | 2866.20            |
| A_68_P30478152 | chr15:98918819-98918863                           | NM_001024702:-681       | C1ql4         | PROMOTER               | 1.327                                                        | 1.812                          | 1095.73            | 1985.63            | 2.406                          | 926.74             | 2229.38            |
| A_68_P21761656 | chr2:154482914-154482958                          | NM_029362:175           | Chmp4b        | INSIDE                 | 1.327                                                        | 2.086                          | 1477.06            | 3080.69            | 2.767                          | 1247.02            | 3450.68            |
| A_68_P21772343 | chr2:156439879-156439923                          | NM_146128:460           | Dlgap4        | INSIDE                 | 1.327                                                        | 4.427                          | 527.59             | 2335.58            | 5.875                          | 478.94             | 2813.59            |
| A_68_P23203768 | chr4:109654665-109654709                          | NM_172296:4057          | Dmrta2        | INSIDE                 | 1.327                                                        | 2.445                          | 731.29             | 1788.17            | 3.245                          | 722.67             | 2345.00            |
| A_68_P27561405 | chr11:4998913-4998957                             | NM_007968:146           | Ewrs1         | INSIDE                 | 1.327                                                        | 2.099                          | 3416.84            | 5404.07            | 2.099                          | 2668.71            | 5601.04            |
| A_68_P21826982 | chr2:165818442-165818486                          | NM_008679:328           | Ncoa3         | INSIDE                 | 1.327                                                        | 2.219                          | 749.00             | 1661.83            | 2.943                          | 601.78             | 1771.19            |
| A_68_P29509959 | chr14:31952078-31952122                           | NM_027289:4062          | Nt5dc2        | INSIDE                 | 1.327                                                        | 6.149                          | 5256.00            | 32320.87           | 8.159                          | 3483.05            | 28419.71           |
| A_68_P27994102 | chr11:87218064-87218108                           | NM_053269:-89           | Rad51c        | DIVERGENT_PROMOTER     | 1.327                                                        | 2.099                          | 2291.40            | 4810.14            | 2.786                          | 1906.29            | 5310.77            |
| A_68_P28690583 | chr12:103521466-103521510                         | NM_001161365:-362       | Rin3          | PROMOTER               | 1.327                                                        | 3.033                          | 1823.63            | 5531.38            | 4.025                          | 1699.66            | 6841.70            |
| A_68_P26626136 | chr9:71959653-71959697                            | NM_011544:-48           | Tcf12         | PROMOTER               | 1.327                                                        | 2.176                          | 413.81             | 900.58             | 2.889                          | 369.21             | 1066.56            |
| A_68_P24973912 | chr7:13556599-13556643                            | NM_178732:5408          | Zfp324        | INSIDE                 | 1.327                                                        | 2.365                          | 596.32             | 1410.24            | 3.138                          | 501.39             | 1573.22            |
| A_68_P22415392 | chr3:108743052-108743096                          | NM_001078646:-400       | 4921515106Rik | PROMOTER               | 1.326                                                        | 3.943                          | 1193.06            | 4704.51            | 5.228                          | 1075.53            | 5622.93            |
| A_68_P23315375 | chr4:132594527-132594571                          | NM_146155:27128         | Ahdcl         | INSIDE                 | 1.326                                                        | 1.780                          | 1395.87            | 2485.03            | 2.360                          | 1182.08            | 2789.86            |
| A_68_P31992643 | chr19:18787618-18787662                           | NM_177640:-85           | D030056L22Rik | PROMOTER               | 1.326                                                        | 1.684                          | 745.29             | 1255.19            | 2.233                          | 604.09             | 1348.65            |
| A_68_P25371481 | chr7:108257732-108257776                          | NM_001146010:466        | Fchsdl        | INSIDE                 | 1.326                                                        | 1.417                          | 1431.97            | 2028.55            | 1.879                          | 1190.75            | 2237.42            |
| A_68_P21393860 | chr2:84499188-84499232                            | NM_001145100:-25        | Gm13718       | DIVERGENT_PROMOTER     | 1.326                                                        | 1.993                          | 461.60             | 920.05             | 2.642                          | 366.33             | 967.97             |
| A_68_P26423570 | chr9:35382219-35382263                            | NM_001167603:8          | Gm6762        | INSIDE                 | 1.326                                                        | 2.375                          | 721.29             | 1713.06            | 3.149                          | 599.39             | 1887.46            |
| A_68_P20472800 | chr1:99666322-99666367                            | NM_173760:325           | Ppip5k2       | INSIDE                 | 1.326                                                        | 1.502                          | 1205.28            | 1810.01            | 1.991                          | 1018.87            | 2028.53            |
| A_68_P33012164 | chr9_random:55526-55570                           | NM_011154:-516          | Ppp2r3d       | PROMOTER               | 1.326                                                        | 1.883                          | 1207.21            | 2273.69            | 2.498                          | 1040.43            | 2598.63            |
| A_68_P22383500 | chr3:102739435-102739479                          | NM_011516:567           | Sycp1         | INSIDE                 | 1.326                                                        | 4.447                          | 800.92             | 3561.39            | 5.896                          | 729.86             | 4303.12            |
| A_68_P20880198 | chr1:183142413-183142457                          | NM_145514:-325          | Wdr26         | PROMOTER               | 1.326                                                        | 3.450                          | 811.74             | 2800.51            | 4.576                          | 663.30             | 3035.36            |
| A_68_P20734230 | chr1:156646554-156646598                          | AK046991:-6703          |               | PROMOTER               | 1.326                                                        | 3.352                          | 528.65             | 1771.80            | 4.445                          | 611.00             | 2715.93            |
| A_68_P32744435 | chrX:147603926-147603970                          | ENSMUST00000151778:-294 |               | PROMOTER               | 1.326                                                        | 2.441                          | 369.44             | 901.85             | 3.236                          | 269.94             | 873.57             |
| A_68_P26870880 | chr9:119071809-119071853                          | NM_146230:-5619         | Acaa1b        | PROMOTER               | 1.325                                                        | 2.532                          | 209.50             | 530.41             | 3.355                          | 199.15             | 668.13             |
| A_68_P21429508 | chr2:92440060-92440104                            | NM_023850:219           | Chst1         | INSIDE                 | 1.325                                                        | 3.221                          | 1274.45            | 4104.95            | 4.267                          | 1061.68            | 4530.38            |
| A_68_P27596686 | chr11:12364779-12364823                           | NM_172496:163           | Cobl          | INSIDE                 | 1.325                                                        | 1.630                          | 1174.88            | 1914.68            | 2.160                          | 879.30             | 1899.17            |
| A_68_P23644441 | chr5:43624695-43624739                            | NM_001177379:15         | Cpeb2         | INSIDE                 | 1.325                                                        | 1.720                          | 758.50             | 1304.34            | 2.279                          | 566.73             | 1291.42            |
| A_68_P32467042 | chrX:71491942-71491986                            | NM_010227:-91           | Flna          | DIVERGENT_PROMOTER     | 1.325                                                        | 1.736                          | 2304.77            | 4001.90            | 2.300                          | 1207.98            | 2778.69            |
| A_68_P26228891 | chr8:124308748-124308792                          | NM_020605:54312         | Jph3          | INSIDE                 | 1.325                                                        | 2.148                          | 1238.21            | 2660.24            | 2.846                          | 994.77             | 2831.00            |
| A_68_P27180702 | chr10:60938602-60938646                           | NM_153542:44            | Lrre20        | INSIDE                 | 1.325                                                        | 2.254                          | 1350.93            | 3044.50            | 2.987                          | 1157.71            | 3458.25            |
| A_68_P24344494 | chr6:32537701-32537745                            | NM_175750:470           | Plkna4        | INSIDE                 | 1.325                                                        | 4.779                          | 906.23             | 4331.14            | 6.332                          | 817.07             | 5173.42            |
| A_68_P25261273 | chr7:86611105-86611149                            | NM_017462:33            | Polg          | INSIDE                 | 1.325                                                        | 2.466                          | 988.11             | 2437.11            | 3.269                          | 783.30             | 2560.71            |

| ProbeName      | Target position of probe on CpG island microarray | TargetID                 | GeneSymbol | CpG island Description | Ratio of relative methylation (TiO <sub>2</sub> -NP/Vehicle) | Sham group                     |                    |                    | TiO <sub>2</sub> -H group      |                    |                    |
|----------------|---------------------------------------------------|--------------------------|------------|------------------------|--------------------------------------------------------------|--------------------------------|--------------------|--------------------|--------------------------------|--------------------|--------------------|
|                |                                                   |                          |            |                        |                                                              | Relative methylation (Cy5/Cy3) | Cy3 signal (Input) | Cy5 signal (MeDIP) | Relative methylation (Cy5/Cy3) | Cy3 signal (Input) | Cy5 signal (MeDIP) |
| A_68_P22373272 | chr3:100914442-100914486                          | NM_011197:-375           | Ptgfrn     | PROMOTER               | 1.325                                                        | 1.846                          | 2116.48            | 3907.36            | 2.446                          | 1668.49            | 4080.89            |
| A_68_P31166410 | chr17:37084116-37084160                           | NM_001099632:4143        | Rnf39      | INSIDE                 | 1.325                                                        | 5.307                          | 804.66             | 4270.32            | 7.033                          | 666.26             | 4685.86            |
| A_68_P27502792 | chr10:120747561-120747605                         | NM_029057:663            | Tbc1d30    | INSIDE                 | 1.325                                                        | 2.310                          | 2694.13            | 6222.40            | 3.061                          | 2143.82            | 6562.39            |
| A_68_P27273028 | chr10:77707431-77707475                           | NM_001081055:-65         | Trappc10   | PROMOTER               | 1.325                                                        | 3.157                          | 464.09             | 1465.08            | 4.183                          | 452.55             | 1892.91            |
| A_68_P30579667 | chr16:18426465-18426509                           | NM_013711:-23            | Txnrd2     | PROMOTER               | 1.325                                                        | 1.481                          | 783.90             | 1161.05            | 1.963                          | 638.69             | 1253.83            |
| A_68_P20737711 | chr1:157264084-157264128                          | NM_011273:468            | Xpr1       | INSIDE                 | 1.325                                                        | 2.450                          | 1346.14            | 3298.40            | 3.246                          | 1119.03            | 3632.03            |
| A_68_P27939246 | chr11:77576975-77577019                           | ENSMUST00000164315:-2108 |            | PROMOTER               | 1.325                                                        | 2.885                          | 618.33             | 1783.74            | 3.822                          | 584.18             | 2232.48            |
| A_68_P32362521 | chrX:45387855-45387899                            | NM_013912:153            | Apln       | INSIDE                 | 1.324                                                        | 2.085                          | 784.66             | 1635.84            | 2.759                          | 531.92             | 1467.67            |
| A_68_P31013735 | chr17:4994646-4994690                             | NM_001085355:-405        | Arid1b     | PROMOTER               | 1.324                                                        | 4.513                          | 834.47             | 3766.07            | 5.977                          | 776.71             | 4642.31            |
| A_68_P31497270 | chr18:11998017-11998061                           | NM_001146287:256         | Cables1    | INSIDE                 | 1.324                                                        | 1.937                          | 792.07             | 1534.37            | 2.566                          | 698.72             | 1792.66            |
| A_68_P31497275 | chr18:11998719-11998763                           | NM_001146287:958         | Cables1    | INSIDE                 | 1.324                                                        | 3.779                          | 866.26             | 3273.55            | 5.003                          | 818.60             | 4095.46            |
| A_68_P27856226 | chr11:62693049-62693093                           | NM_026210:79             | Fam18b     | INSIDE                 | 1.324                                                        | 1.619                          | 2108.69            | 3414.57            | 2.144                          | 1632.20            | 3499.12            |
| A_68_P28691639 | chr12:103707284-103707328                         | NM_001199004:-37         | Golga5     | PROMOTER               | 1.324                                                        | 6.824                          | 728.83             | 4973.52            | 9.036                          | 662.37             | 5985.37            |
| A_68_P23595697 | chr5:35003116-35003160                            | NM_001080743:111         | Grk4       | INSIDE                 | 1.324                                                        | 3.205                          | 811.98             | 2602.50            | 4.245                          | 698.69             | 2965.75            |
| A_68_P26551398 | chr9:58883897-58883941                            | NM_001042752:330         | Neol       | INSIDE                 | 1.324                                                        | 2.352                          | 598.47             | 1407.40            | 3.113                          | 584.31             | 1818.90            |
| A_68_P21099262 | chr2:29602819-29602863                            | NM_001039086:127601      | Rapgef1    | DOWNSTREAM             | 1.324                                                        | 1.773                          | 2158.80            | 3827.34            | 2.347                          | 1966.85            | 4616.65            |
| A_68_P24061815 | chr5:124991287-124991331                          | NM_019770:509            | Tmed2      | INSIDE                 | 1.324                                                        | 3.457                          | 830.90             | 2872.79            | 4.579                          | 726.16             | 3324.86            |
| A_68_P27941693 | chr11:77978890-77978934                           | NM_009423:140            | Traf4      | INSIDE                 | 1.324                                                        | 2.290                          | 976.67             | 2236.09            | 3.031                          | 1005.12            | 3046.52            |
| A_68_P24974195 | chr7:13610408-13610452                            | NM_011588:930            | Trim28     | INSIDE                 | 1.324                                                        | 1.826                          | 4941.50            | 9023.02            | 2.417                          | 3820.40            | 9233.04            |
| A_68_P25805592 | chr8:41509363-41509407                            | NM_178395:216            | Zdhhc2     | INSIDE                 | 1.324                                                        | 4.035                          | 2183.74            | 8811.56            | 5.341                          | 1808.12            | 9656.86            |
| A_68_P27282404 | chr10:79778048-79778092                           | NM_011789:13506          | Apc2       | INSIDE                 | 1.323                                                        | 2.930                          | 1282.30            | 3757.48            | 3.878                          | 1101.62            | 4272.28            |
| A_68_P28731659 | chr12:110290536-110290580                         | NM_001163175:15869       | Begain     | INSIDE                 | 1.323                                                        | 1.482                          | 865.97             | 1283.25            | 1.960                          | 693.49             | 1359.22            |
| A_68_P24172982 | chr5:148118030-148118074                          | NM_007673:773            | Cdx2       | INSIDE                 | 1.323                                                        | 1.526                          | 745.96             | 1137.99            | 2.019                          | 620.09             | 1251.70            |
| A_68_P20884270 | chr1:183853884-183853931                          | NM_001083120:96204       | Enah       | INSIDE                 | 1.323                                                        | 4.449                          | 283.64             | 1261.81            | 5.883                          | 245.23             | 1442.75            |
| A_68_P30672048 | chr16:35770485-35770529                           | NM_175111:35             | Hspbap1    | INSIDE                 | 1.323                                                        | 1.888                          | 504.28             | 952.34             | 2.498                          | 500.95             | 1251.18            |
| A_68_P22301530 | chr3:86028536-86028580                            | NM_001077687:-53         | Lrba       | PROMOTER               | 1.323                                                        | 1.558                          | 2396.45            | 3734.12            | 2.062                          | 1823.34            | 3759.48            |
| A_68_P30477059 | chr15:98702362-98702406                           | NM_001033276:-770        | Mil2       | PROMOTER               | 1.323                                                        | 0.489                          | 1195.94            | 585.17             | 0.647                          | 1062.71            | 687.82             |
| A_68_P22129522 | chr3:51220411-51220455                            | NM_053089:495            | Naa15      | INSIDE                 | 1.323                                                        | 3.886                          | 2611.95            | 10149.18           | 5.142                          | 2331.12            | 11986.67           |
| A_68_P29962214 | chr14:122933466-122933510                         | NM_144844:-61            | Peca       | PROMOTER               | 1.323                                                        | 2.679                          | 806.16             | 2159.36            | 3.543                          | 661.97             | 2345.13            |
| A_68_P27926516 | chr11:75323969-75324013                           | NM_001029938:395         | Rilp       | INSIDE                 | 1.323                                                        | 5.409                          | 923.84             | 4997.02            | 7.158                          | 875.77             | 6268.87            |
| A_68_P20502876 | chr1:107253429-107253473                          | NM_001160368:-163        | Rnf152     | PROMOTER               | 1.323                                                        | 1.967                          | 771.60             | 1518.09            | 2.603                          | 700.33             | 1822.83            |
| A_68_P32056100 | chr19:30105268-30105312                           | NM_144873:288            | Uhrf2      | INSIDE                 | 1.323                                                        | 1.524                          | 1487.05            | 2265.92            | 2.016                          | 1267.08            | 2555.01            |
| A_68_P27532843 | chr10:126338419-126338463                         | NM_026858:-13            | Xrcc6bp1   | PROMOTER               | 1.323                                                        | 3.405                          | 5351.64            | 18221.11           | 4.504                          | 3691.77            | 16628.77           |
| A_68_P26744829 | chr9:95855445-95855489                            | NM_011916:288            | Xrn1       | INSIDE                 | 1.323                                                        | 1.870                          | 757.69             | 1417.19            | 2.474                          | 690.29             | 1707.60            |
| A_68_P25288546 | chr7:91558357-91558401                            | NM_007488:91             | Arnt2      | INSIDE                 | 1.322                                                        | 2.099                          | 764.77             | 1605.49            | 2.774                          | 727.59             | 2018.56            |
| A_68_P23909952 | chr5:97426279-97426323                            | NM_080708:-407           | Bmp2k      | PROMOTER               | 1.322                                                        | 2.863                          | 2058.50            | 5893.04            | 3.785                          | 1676.29            | 6345.46            |
| A_68_P21134948 | chr2:35516613-35516657                            | NM_001114124:39134       | Dab2ip     | INSIDE                 | 1.322                                                        | 2.312                          | 2135.86            | 4937.48            | 3.057                          | 1571.09            | 4802.63            |
| A_68_P25728861 | chr8:26864655-26864699                            | NM_028102:76             | Dhd2       | INSIDE                 | 1.322                                                        | 3.597                          | 1997.80            | 7186.27            | 4.756                          | 1678.32            | 7982.86            |
| A_68_P23981086 | chr5:111082431-111082475                          | NM_027156:-17            | Ddx51      | DIVERGENT_PROMOTER     | 1.322                                                        | 2.900                          | 612.99             | 1777.46            | 3.835                          | 595.78             | 2284.63            |
| A_68_P23392750 | chr4:147533918-147533962                          | NM_001161851:-236        | Fbxo44     | PROMOTER               | 1.322                                                        | 2.102                          | 1717.08            | 3610.11            | 2.779                          | 1242.74            | 3453.90            |
| A_68_P20306027 | chr1:67085323-67085367                            | NM_001190984:64          | Lancel1    | INSIDE                 | 1.322                                                        | 2.292                          | 2434.12            | 5579.96            | 3.030                          | 2089.25            | 6330.04            |
| A_68_P23188354 | chr4:106739410-106739454                          | NM_025500:39             | Mrp137     | INSIDE                 | 1.322                                                        | 2.233                          | 1362.25            | 3042.43            | 2.952                          | 1105.58            | 3263.30            |
| A_68_P25806930 | chr8:41720049-41720093                            | NM_001040699:76          | Mtmr7      | INSIDE                 | 1.322                                                        | 1.868                          | 846.82             | 1581.48            | 2.469                          | 711.06             | 1755.95            |
| A_68_P25115908 | chr7:57231147-57231191                            | NM_001037906:449         | Nell1      | INSIDE                 | 1.322                                                        | 1.503                          | 757.62             | 1138.89            | 1.987                          | 705.90             | 1402.58            |
| A_68_P20625253 | chr1:134942691-134942735                          | NM_001099276:124         | Pik3c2b    | INSIDE                 | 1.322                                                        | 1.948                          | 999.52             | 1946.72            | 2.575                          | 823.42             | 2120.49            |
| A_68_P24774308 | chr6:115944222-115944266                          | NM_026376:779            | Plxd1      | INSIDE                 | 1.322                                                        | 1.750                          | 1046.01            | 1830.01            | 2.313                          | 852.82             | 1972.65            |
| A_68_P23544155 | chr5:24348677-24348721                            | NM_053075:-519           | Rheb       | PROMOTER               | 1.322                                                        | 1.864                          | 2804.58            | 5226.78            | 2.464                          | 2232.16            | 5501.05            |
| A_68_P26429692 | chr9:37062811-37062855                            | NM_001145960:491         | Slc37a2    | INSIDE                 | 1.322                                                        | 1.616                          | 5577.69            | 9012.00            | 2.136                          | 3945.81            | 8426.96            |
| A_68_P32287972 | chrX:19869101-19869145                            | NM_177353:-232           | Slc9a7     | PROMOTER               | 1.322                                                        | 2.514                          | 1294.20            | 3253.30            | 3.324                          | 852.12             | 2832.80            |
| A_68_P22317588 | chr3:88968981-88969026                            | NM_001163432:277         | Clk2       | INSIDE                 | 1.321                                                        | 1.518                          | 1934.64            | 2936.72            | 2.005                          | 1581.67            | 3170.46            |
| A_68_P29246778 | chr13:97313012-97313056                           | NM_001164222:345         | Col4a3bp   | INSIDE                 | 1.321                                                        | 1.625                          | 1179.00            | 1916.11            | 2.148                          | 1123.96            | 2413.79            |

| ProbeName      | Target position of probe on CpG island microarray | TargetID               | GeneSymbol    | CpG island Description | Ratio of relative methylation (TiO <sub>2</sub> -NP/Vehicle) | Sham group                     |                    |                    | TiO <sub>2</sub> -H group      |                    |                    |
|----------------|---------------------------------------------------|------------------------|---------------|------------------------|--------------------------------------------------------------|--------------------------------|--------------------|--------------------|--------------------------------|--------------------|--------------------|
|                |                                                   |                        |               |                        |                                                              | Relative methylation (Cy5/Cy3) | Cy3 signal (Input) | Cy5 signal (MeDIP) | Relative methylation (Cy5/Cy3) | Cy3 signal (Input) | Cy5 signal (MeDIP) |
| A_68_P24091776 | chr5:130505164-130505208                          | NM_007761:11           | Crcp          | INSIDE                 | 1.321                                                        | 8.956                          | 626.35             | 5609.50            | 11.831                         | 547.25             | 6474.46            |
| A_68_P24058535 | chr5:124423625-124423669                          | NM_145070:10           | Hip1r         | INSIDE                 | 1.321                                                        | 2.395                          | 2236.78            | 5356.70            | 3.163                          | 1780.95            | 5632.28            |
| A_68_P25956632 | chr8:73905289-73905333                            | NM_010150:541          | Nr2f6         | INSIDE                 | 1.321                                                        | 1.811                          | 433.75             | 785.73             | 2.393                          | 366.94             | 878.09             |
| A_68_P31709378 | chr18:52927767-52927811                           | NM_001199154:-9        | Sncap1        | PROMOTER               | 1.321                                                        | 1.496                          | 4933.51            | 7378.29            | 1.976                          | 3616.94            | 7147.28            |
| A_68_P22363128 | chr3:99057574-99057618                            | NM_009323:-86          | Tbx15         | PROMOTER               | 1.321                                                        | 3.627                          | 5475.86            | 19861.59           | 4.790                          | 4531.13            | 21704.62           |
| A_68_P24543633 | chr6:72738096-72738140                            | NM_001079822:832       | Tef7l1        | INSIDE                 | 1.321                                                        | 3.710                          | 3090.85            | 11466.74           | 4.900                          | 2656.84            | 13017.93           |
| A_68_P26845370 | chr9:114471876-114471920                          | NM_001042503:1589      | Trim71        | INSIDE                 | 1.321                                                        | 2.375                          | 839.43             | 1993.48            | 3.137                          | 804.38             | 2523.27            |
| A_68_P27332826 | chr10:89208214-89208258                           | NM_029166:501          | Uhrf1bp11     | INSIDE                 | 1.321                                                        | 4.622                          | 896.95             | 4146.03            | 6.104                          | 667.30             | 4073.18            |
| A_68_P32462207 | chrX:70599165-70599209                            | NM_001160229:11227     | Zfp275        | INSIDE                 | 1.321                                                        | 2.975                          | 477.54             | 1420.49            | 3.931                          | 285.08             | 1120.50            |
| A_68_P28011630 | chr11:90279544-90279588                           | AK139414:-6564         |               | PROMOTER               | 1.321                                                        | 1.916                          | 1131.88            | 2168.43            | 2.532                          | 980.47             | 2482.21            |
| A_68_P27330524 | chr10:88807370-88807414                           | ENSMUST00000168681:115 |               | INSIDE                 | 1.321                                                        | 2.051                          | 223.51             | 458.37             | 2.710                          | 240.47             | 651.64             |
| A_68_P22726935 | chr4:10801906-10801950                            | NM_026005:284          | 2610301B20Rik | INSIDE                 | 1.320                                                        | 1.516                          | 1758.59            | 2666.84            | 2.001                          | 1483.27            | 2968.67            |
| A_68_P32202573 | chr19:56796579-56796623                           | NM_007419:-261         | Adrb1         | PROMOTER               | 1.320                                                        | 3.560                          | 1510.97            | 5378.29            | 4.697                          | 1303.70            | 6123.66            |
| A_68_P22388171 | chr3:103613470-103613514                          | NM_001163552:53        | Ap4b1         | INSIDE                 | 1.320                                                        | 2.902                          | 670.75             | 1946.43            | 3.830                          | 684.49             | 2621.58            |
| A_68_P25657174 | chr8:11728216-11728260                            | NM_001113517:134       | Arhgef7       | INSIDE                 | 1.320                                                        | 4.272                          | 2013.22            | 8601.05            | 5.640                          | 1690.72            | 9536.17            |
| A_68_P24925489 | chr6:145814071-145814115                          | NM_024469:-232         | Bhlhe41       | PROMOTER               | 1.320                                                        | 2.428                          | 2408.96            | 5849.72            | 3.204                          | 1870.90            | 5995.06            |
| A_68_P31746198 | chr18:59334973-59335017                           | NM_001081328:1         | Chsy3         | INSIDE                 | 1.320                                                        | 0.393                          | 1365.51            | 536.56             | 0.519                          | 1369.65            | 710.52             |
| A_68_P22318693 | chr3:89141626-89141670                            | NM_007910:302          | Efn4          | INSIDE                 | 1.320                                                        | 2.758                          | 517.65             | 1427.61            | 3.639                          | 477.52             | 1737.92            |
| A_68_P25637624 | chr8:8661448-8661492                              | NM_010111:-697         | Efnb2         | PROMOTER               | 1.320                                                        | 1.744                          | 681.68             | 1188.93            | 2.302                          | 668.01             | 1538.05            |
| A_68_P22565464 | chr3:137527246-137527290                          | NM_016750:-294         | H2afz         | PROMOTER               | 1.320                                                        | 0.463                          | 2174.78            | 1007.66            | 0.612                          | 1794.34            | 1097.28            |
| A_68_P21338759 | chr2:74520621-74520665                            | NM_008273:193          | Hoxd11        | INSIDE                 | 1.320                                                        | 2.060                          | 679.69             | 1400.29            | 2.719                          | 543.50             | 1477.82            |
| A_68_P30514376 | chr16:5203769-5203813                             | NM_013796:315          | Nagpa         | INSIDE                 | 1.320                                                        | 2.344                          | 1058.07            | 2479.86            | 3.094                          | 1030.70            | 3189.24            |
| A_68_P26345775 | chr9:20970639-20970683                            | NM_183408:503          | Pde4a         | INSIDE                 | 1.320                                                        | 1.653                          | 649.90             | 1074.00            | 2.181                          | 628.84             | 1371.80            |
| A_68_P26700011 | chr9:86465251-86465295                            | NM_001163746:177       | Pgm3          | INSIDE                 | 1.320                                                        | 1.631                          | 2316.46            | 3777.33            | 2.153                          | 1896.78            | 4083.99            |
| A_68_P31154947 | chr17:34769261-34769305                           | NM_030890:2652         | Prrt1         | DOWNSTREAM             | 1.320                                                        | 2.189                          | 2412.13            | 5279.41            | 2.889                          | 1946.67            | 5624.40            |
| A_68_P28678694 | chr12:101122653-101122697                         | NM_028354:-50          | Tdp1          | DIVERGENT_PROMOTER     | 1.320                                                        | 3.553                          | 464.84             | 1651.56            | 4.689                          | 439.59             | 2061.40            |
| A_68_P24951679 | chr7:4982581-4982625                              | NM_001033383:10625     | Zfp865        | INSIDE                 | 1.320                                                        | 2.406                          | 217.38             | 523.13             | 3.175                          | 195.46             | 620.66             |
| A_68_P20863554 | chr1:180299211-180299255                          |                        |               | Unknown                | 1.320                                                        | 2.271                          | 629.91             | 1430.31            | 2.996                          | 579.01             | 1735.00            |
| A_68_P31661525 | chr18:43597987-43598031                           | ENSMUST00000121805:-68 |               | PROMOTER               | 1.320                                                        | 1.411                          | 2721.78            | 3839.24            | 1.862                          | 2099.50            | 3909.95            |
| A_68_P30570068 | chr16:16600185-16600230                           | ENSMUST00000162414:-75 |               | PROMOTER               | 1.320                                                        | 3.597                          | 774.75             | 2786.93            | 4.748                          | 678.05             | 3219.19            |
| A_68_P26084574 | chr8:98202070-98202114                            | ENSMUST00000166358:-52 |               | PROMOTER               | 1.320                                                        | 8.324                          | 737.08             | 6135.13            | 10.985                         | 646.80             | 7104.85            |
| A_68_P21665423 | chr2:136716895-136716939                          | NM_028201:-37          | 2210009G21Rik | PROMOTER               | 1.319                                                        | 1.987                          | 2290.35            | 4549.79            | 2.620                          | 2013.89            | 5275.58            |
| A_68_P24383687 | chr6:39507859-39507903                            | NM_172477:-47          | Dennd2a       | PROMOTER               | 1.319                                                        | 1.931                          | 2240.18            | 4324.83            | 2.546                          | 1784.98            | 4544.03            |
| A_68_P25520723 | chr7:137409825-137409869                          | NM_010207:476          | Fgf2          | INSIDE                 | 1.319                                                        | 2.219                          | 720.81             | 1599.73            | 2.926                          | 714.70             | 2091.51            |
| A_68_P31347829 | chr17:74059599-74059643                           | NM_027864:171          | Galnt14       | INSIDE                 | 1.319                                                        | 5.333                          | 1697.21            | 9051.21            | 7.032                          | 1550.96            | 10906.59           |
| A_68_P24632565 | chr6:90412944-90412988                            | NM_023184:347          | Klfl5         | INSIDE                 | 1.319                                                        | 2.825                          | 1583.42            | 4472.47            | 3.724                          | 1453.82            | 5414.34            |
| A_68_P26159961 | chr8:112485994-112486038                          | NM_212447:89           | Marveld3      | INSIDE                 | 1.319                                                        | 2.326                          | 1310.01            | 3047.50            | 3.068                          | 1049.69            | 3220.71            |
| A_68_P26980661 | chr10:19077130-19077174                           | NM_053008:808          | Olig3         | INSIDE                 | 1.319                                                        | 1.602                          | 3972.90            | 6365.16            | 2.113                          | 3129.88            | 6612.40            |
| A_68_P30346610 | chr15:76011282-76011326                           | NM_201394:14836        | Plec          | INSIDE                 | 1.319                                                        | 4.220                          | 2274.76            | 9599.30            | 5.566                          | 2082.10            | 11589.26           |
| A_68_P25092682 | chr7:52621989-52622033                            | NM_029741:379          | Ppfia3        | INSIDE                 | 1.319                                                        | 3.297                          | 1302.15            | 4293.37            | 4.350                          | 1083.03            | 4711.70            |
| A_68_P20848445 | chr1:177422484-177422528                          | NM_001199003:170       | Rgs7          | INSIDE                 | 1.319                                                        | 4.625                          | 1420.26            | 6569.12            | 6.099                          | 1880.03            | 11466.08           |
| A_68_P31256956 | chr17:56705945-56705989                           | NM_001029979:18040     | Safb2         | INSIDE                 | 1.319                                                        | 2.169                          | 888.39             | 1926.95            | 2.861                          | 748.12             | 2140.56            |
| A_68_P32021818 | chr19:24205720-24205764                           | NM_001198985:42888     | Tjp2          | INSIDE                 | 1.319                                                        | 3.260                          | 1992.82            | 6497.09            | 4.300                          | 1836.06            | 7895.64            |
| A_68_P27886200 | chr11:67735519-67735563                           | NM_173754:115          | Usp43         | INSIDE                 | 1.319                                                        | 2.168                          | 1106.12            | 2397.93            | 2.859                          | 1010.27            | 2887.95            |
| A_68_P30499184 | chr15:102523520-102523564                         |                        |               | Unknown                | 1.319                                                        | 2.082                          | 1555.22            | 3237.48            | 2.746                          | 1259.57            | 3458.69            |
| A_68_P25782091 | chr8:36889227-36889271                            | NM_027998:365          | Cldn23        | INSIDE                 | 1.318                                                        | 1.908                          | 1666.44            | 3179.85            | 2.514                          | 1326.53            | 3335.34            |
| A_68_P22882282 | chr4:45333130-45333174                            | NM_025513:323          | Exosc3        | INSIDE                 | 1.318                                                        | 1.446                          | 2411.88            | 3486.72            | 1.906                          | 1944.14            | 3705.42            |
| A_68_P23577613 | chr5:31598167-31598211                            | NM_022424:62           | Fndc4         | INSIDE                 | 1.318                                                        | 1.773                          | 1145.28            | 2031.03            | 2.337                          | 1017.31            | 2376.98            |
| A_68_P23332312 | chr4:135700753-135700797                          | NM_008321:1038         | Id3           | INSIDE                 | 1.318                                                        | 2.129                          | 2120.22            | 4514.37            | 2.805                          | 1786.75            | 5012.28            |
| A_68_P24137557 | chr5:140251443-140251487                          | NM_026748:168          | Ints1         | INSIDE                 | 1.318                                                        | 1.468                          | 915.06             | 1342.90            | 1.934                          | 798.05             | 1543.68            |
| A_68_P24476402 | chr6:56654577-56654621                            | NM_025520:95           | Lsm5          | INSIDE                 | 1.318                                                        | 2.109                          | 1461.25            | 3081.26            | 2.780                          | 1251.41            | 3478.55            |

| ProbeName      | Target position of probe on CpG island microarray | TargetID           | GeneSymbol    | CpG island Description | Ratio of relative methylation (TiO <sub>2</sub> -NP/Vehicle) | Sham group                     |                    |                    | TiO <sub>2</sub> -H group      |                    |                    |
|----------------|---------------------------------------------------|--------------------|---------------|------------------------|--------------------------------------------------------------|--------------------------------|--------------------|--------------------|--------------------------------|--------------------|--------------------|
|                |                                                   |                    |               |                        |                                                              | Relative methylation (Cy5/Cy3) | Cy3 signal (Input) | Cy5 signal (MeDIP) | Relative methylation (Cy5/Cy3) | Cy3 signal (Input) | Cy5 signal (MeDIP) |
| A_68_P25210716 | chr7:77496064-77496108                            | NM_009697:9393     | Nr2f2         | DOWNSTREAM             | 1.318                                                        | 1.531                          | 3364.96            | 5151.09            | 2.017                          | 2659.38            | 5363.72            |
| A_68_P24898883 | chr6:141198105-141198149                          | NM_018779:337      | Pdc3a         | INSIDE                 | 1.318                                                        | 1.967                          | 1181.39            | 2323.47            | 2.593                          | 1024.49            | 2656.20            |
| A_68_P30403196 | chr15:85652378-85652422                           | NM_011105:-237     | Pkdrej        | PROMOTER               | 1.318                                                        | 2.450                          | 1129.50            | 2767.12            | 3.228                          | 959.14             | 3096.33            |
| A_68_P21866928 | chr2:172805309-172805353                          | NM_001083959:-12   | Spo11         | PROMOTER               | 1.318                                                        | 2.220                          | 487.00             | 1081.11            | 2.927                          | 445.93             | 1305.23            |
| A_68_P20147164 | chr1:36300875-36300919                            | NM_198899:251      | Uggt1         | INSIDE                 | 1.318                                                        | 1.554                          | 6959.13            | 10817.93           | 2.049                          | 5371.50            | 11004.76           |
| A_68_P26153110 | chr8:111316387-111316431                          | NM_007496:77865    | Zfx3          | INSIDE                 | 1.318                                                        | 1.759                          | 1250.27            | 2199.65            | 2.319                          | 1015.92            | 2356.18            |
| A_68_P24155687 | chr5:144015862-144015906                          | NM_017467:15817    | Zfp316        | INSIDE                 | 1.318                                                        | 2.428                          | 1061.06            | 2576.73            | 3.200                          | 953.54             | 3051.26            |
| A_68_P25726105 | chr8:26350956-26351000                            | AK190590:395       |               | INSIDE                 | 1.318                                                        | 2.020                          | 2706.47            | 5467.91            | 2.663                          | 2103.71            | 5602.89            |
| A_68_P26577166 | chr9:63450424-63450468                            | NM_025857:-15      | Aagab         | DIVERGENT_PROMOTER     | 1.317                                                        | 2.201                          | 789.44             | 1737.57            | 2.898                          | 785.77             | 2277.24            |
| A_68_P32260263 | chrX:11655948-11655992                            | NM_029510:1709     | Bcor          | INSIDE                 | 1.317                                                        | 1.450                          | 1662.62            | 2410.33            | 1.910                          | 944.99             | 1804.58            |
| A_68_P26527664 | chr9:54613648-54613692                            | NM_013496:1056     | Crabp1        | INSIDE                 | 1.317                                                        | 3.590                          | 700.69             | 2515.53            | 4.726                          | 547.75             | 2588.92            |
| A_68_P26699340 | chr9:86360809-86360853                            | NM_177208:70       | Dopey1        | INSIDE                 | 1.317                                                        | 3.081                          | 452.97             | 1395.49            | 4.057                          | 466.30             | 1891.79            |
| A_68_P21517948 | chr2:109757926-109757970                          | NM_172671:145      | Lgr4          | INSIDE                 | 1.317                                                        | 2.059                          | 1364.16            | 2809.25            | 2.713                          | 1274.38            | 3457.38            |
| A_68_P32466328 | chrX:71330831-71330875                            | NM_010788:80       | Mecp2         | INSIDE                 | 1.317                                                        | 1.608                          | 3044.74            | 4895.49            | 2.117                          | 1475.04            | 3123.20            |
| A_68_P25285286 | chr7:91031153-91031197                            | NM_030705:1677     | Mesdc1        | INSIDE                 | 1.317                                                        | 2.271                          | 786.92             | 1786.81            | 2.990                          | 595.14             | 1779.19            |
| A_68_P25780633 | chr8:36651446-36651490                            | NM_001081279:617   | Mthas1        | INSIDE                 | 1.317                                                        | 3.439                          | 1040.64            | 3578.81            | 4.530                          | 892.16             | 4041.59            |
| A_68_P25709495 | chr8:23276840-23276884                            | NM_001162947:-3896 | Nek3          | PROMOTER               | 1.317                                                        | 1.834                          | 1288.04            | 2362.78            | 2.415                          | 1231.44            | 2974.50            |
| A_68_P29753348 | chr14:80170386-80170430                           | NM_001042726:711   | Pedh8         | INSIDE                 | 1.317                                                        | 1.591                          | 863.36             | 1373.18            | 2.094                          | 833.06             | 1744.50            |
| A_68_P28035922 | chr11:94852837-94852881                           | NM_172261:333      | Ppp1r9b       | INSIDE                 | 1.317                                                        | 1.664                          | 1090.30            | 1814.24            | 2.191                          | 892.40             | 1955.69            |
| A_68_P24155330 | chr5:143942270-143942314                          | NM_001045482:130   | Rbak          | INSIDE                 | 1.317                                                        | 2.620                          | 712.56             | 1866.56            | 3.449                          | 625.96             | 2159.09            |
| A_68_P21817914 | chr2:164268773-164268817                          | NM_011521:-106     | Sdc4          | PROMOTER               | 1.317                                                        | 2.861                          | 1038.43            | 2970.56            | 3.767                          | 992.39             | 3738.59            |
| A_68_P24950759 | chr7:4788111-47881155                             | NM_172737:8166     | Shisa7        | INSIDE                 | 1.317                                                        | 2.924                          | 1027.97            | 3006.28            | 3.850                          | 868.11             | 3342.30            |
| A_68_P26477006 | chr9:45762946-45762990                            | NM_172257:364      | Sid2          | INSIDE                 | 1.317                                                        | 1.784                          | 898.87             | 1603.27            | 2.348                          | 854.15             | 2005.80            |
| A_68_P23575087 | chr5:31172049-31172093                            | NM_144525:51       | Tmem214       | INSIDE                 | 1.317                                                        | 1.506                          | 7935.28            | 11952.04           | 1.984                          | 6042.37            | 11988.98           |
| A_68_P28575795 | chr12:81564283-81564327                           | NM_133798:223      | Exd2          | INSIDE                 | 1.316                                                        | 3.658                          | 5153.17            | 18848.24           | 4.815                          | 3636.13            | 17508.68           |
| A_68_P29346590 | chr13:115249262-115249306                         | NM_008046:-346     | Fst           | PROMOTER               | 1.316                                                        | 1.653                          | 2540.27            | 4200.22            | 2.175                          | 2104.93            | 4578.71            |
| A_68_P29469014 | chr14:24824046-24824090                           | NM_010610:-641     | Kenma1        | PROMOTER               | 1.316                                                        | 1.484                          | 878.85             | 1304.58            | 1.954                          | 776.79             | 1517.81            |
| A_68_P22934434 | chr4:55545364-55545408                            | NM_010637:-39      | Klf4          | PROMOTER               | 1.316                                                        | 2.394                          | 1702.46            | 4075.57            | 3.151                          | 1374.43            | 4330.43            |
| A_68_P26983898 | chr10:19654588-19654632                           | NM_008580:279      | Map3k5        | INSIDE                 | 1.316                                                        | 1.760                          | 1671.56            | 2942.32            | 2.317                          | 1513.87            | 3507.61            |
| A_68_P32134821 | chr19:44911447-44911492                           | NM_011037:79586    | Pax2          | INSIDE                 | 1.316                                                        | 1.500                          | 3089.94            | 4634.51            | 1.974                          | 2528.66            | 4991.94            |
| A_68_P22878697 | chr4:44723513-44723557                            | NM_008782:-222     | Pax5          | PROMOTER               | 1.316                                                        | 3.224                          | 1352.76            | 4361.46            | 4.242                          | 1245.43            | 5283.32            |
| A_68_P21834482 | chr2:167065917-167065961                          | NM_008968:99       | Ptgis         | INSIDE                 | 1.316                                                        | 1.640                          | 3977.78            | 6523.45            | 2.158                          | 2785.35            | 6011.84            |
| A_68_P27926562 | chr11:75328897-75328941                           | NM_001004157:1876  | Scarf1        | INSIDE                 | 1.316                                                        | 2.051                          | 1029.47            | 2111.34            | 2.700                          | 897.94             | 2424.25            |
| A_68_P24024080 | chr5:118478322-118478366                          | NM_021344:512      | Tesc          | INSIDE                 | 1.316                                                        | 4.629                          | 945.70             | 4377.53            | 6.091                          | 838.74             | 5108.40            |
| A_68_P31202525 | chr17:45822791-45822835                           | NM_198167:355      | Tmem63b       | INSIDE                 | 1.316                                                        | 2.089                          | 1211.65            | 2530.68            | 2.750                          | 1011.81            | 2782.04            |
| A_68_P27836014 | chr11:59102302-59102346                           | NM_009522:1929     | Wnt3a         | INSIDE                 | 1.316                                                        | 2.997                          | 382.20             | 1145.35            | 3.943                          | 377.15             | 1487.10            |
| A_68_P31412802 | chr17:86199409-86199453                           | AK142122:208       |               | INSIDE                 | 1.316                                                        | 1.854                          | 5358.93            | 9934.05            | 2.439                          | 3923.47            | 9570.58            |
| A_68_P23947800 | chr5:104084571-104084615                          | NM_028824:151      | 1700016H13Rik | INSIDE                 | 1.315                                                        | 2.463                          | 1484.82            | 3656.51            | 3.237                          | 1183.61            | 3831.77            |
| A_68_P27934861 | chr11:76759571-76759615                           | NM_178645:435      | Blimh         | INSIDE                 | 1.315                                                        | 1.589                          | 1623.20            | 2580.04            | 2.090                          | 1495.91            | 3126.22            |
| A_68_P31186620 | chr17:43013150-43013194                           | NM_009847:201      | Cd2ap         | INSIDE                 | 1.315                                                        | 1.968                          | 1075.29            | 2115.69            | 2.588                          | 976.54             | 2527.28            |
| A_68_P23309921 | chr4:131604501-131604545                          | NM_001128606:471   | Epb4.1        | INSIDE                 | 1.315                                                        | 5.420                          | 2522.16            | 13670.18           | 7.125                          | 2069.71            | 14747.50           |
| A_68_P24046891 | chr5:122302921-122302965                          | NM_175474:3906     | Fam109a       | INSIDE                 | 1.315                                                        | 2.427                          | 1047.84            | 2542.75            | 3.190                          | 849.76             | 2711.06            |
| A_68_P29571200 | chr14:46149352-46149396                           | NM_146054:366      | Fermt2        | INSIDE                 | 1.315                                                        | 1.812                          | 1239.14            | 2245.38            | 2.383                          | 1044.63            | 2488.84            |
| A_68_P27594244 | chr11:11925917-11925961                           | NM_001177629:2036  | Grb10         | INSIDE                 | 1.315                                                        | 4.773                          | 1924.73            | 9187.03            | 6.276                          | 1482.37            | 9303.42            |
| A_68_P20556973 | chr1:121318457-121318501                          | NM_008381:347      | Inhbb         | INSIDE                 | 1.315                                                        | 3.089                          | 2105.89            | 6505.40            | 4.063                          | 1555.58            | 6320.74            |
| A_68_P21717097 | chr2:146047662-146047707                          | NM_016889:-48      | Insm1         | PROMOTER               | 1.315                                                        | 1.575                          | 1716.91            | 2703.90            | 2.071                          | 1521.54            | 3150.50            |
| A_68_P26270748 | chr8:131209625-131209669                          | NM_010578:93       | Itgb1         | INSIDE                 | 1.315                                                        | 1.669                          | 1173.41            | 1958.52            | 2.195                          | 1081.42            | 2373.62            |
| A_68_P32051829 | chr19:29326236-29326280                           | NM_001048177:-59   | Jak2          | PROMOTER               | 1.315                                                        | 1.953                          | 1573.61            | 3073.02            | 2.567                          | 1283.59            | 3295.20            |
| A_68_P25092919 | chr7:52661992-52662036                            | NM_010596:685      | Kena7         | INSIDE                 | 1.315                                                        | 2.433                          | 798.30             | 1942.21            | 3.200                          | 662.46             | 2119.90            |
| A_68_P30359963 | chr15:78267288-78267332                           | NM_001081367:8253  | Kctd17        | INSIDE                 | 1.315                                                        | 2.639                          | 2635.29            | 6955.47            | 3.470                          | 1700.55            | 5901.06            |
| A_68_P20453265 | chr1:94996931-94996975                            | NM_001110315:1490  | Kif1a         | INSIDE                 | 1.315                                                        | 3.015                          | 2093.88            | 6313.38            | 3.964                          | 1718.09            | 6810.50            |

| ProbeName      | Target position of probe on CpG island microarray | TargetID                | GeneSymbol    | CpG island Description | Ratio of relative methylation (TiO <sub>2</sub> -NP/Vehicle) | Sham group                     |                    |                    | TiO <sub>2</sub> -H group      |                    |                    |
|----------------|---------------------------------------------------|-------------------------|---------------|------------------------|--------------------------------------------------------------|--------------------------------|--------------------|--------------------|--------------------------------|--------------------|--------------------|
|                |                                                   |                         |               |                        |                                                              | Relative methylation (Cy5/Cy3) | Cy3 signal (Input) | Cy5 signal (MeDIP) | Relative methylation (Cy5/Cy3) | Cy3 signal (Input) | Cy5 signal (MeDIP) |
| A_68_P30345385 | chr15:75829377-75829421                           | NM_177922:5200          | Mapk15        | INSIDE                 | 1.315                                                        | 2.436                          | 4535.10            | 11047.77           | 3.204                          | 3380.91            | 10832.31           |
| A_68_P23592026 | chr5:34340043-34340087                            | NM_001001985:1432       | Nat8l         | INSIDE                 | 1.315                                                        | 2.110                          | 377.84             | 797.40             | 2.774                          | 325.05             | 901.76             |
| A_68_P20231212 | chr1:53353853-53353897                            | NM_153556:-34           | Pms1          | DIVERGENT_PROMOTER     | 1.315                                                        | 6.054                          | 2118.56            | 12825.81           | 7.960                          | 1553.22            | 12363.36           |
| A_68_P29094194 | chr13:63669536-63669580                           | NM_008957:-2730         | Ptch1         | PROMOTER               | 1.315                                                        | 1.537                          | 1530.49            | 2351.68            | 2.020                          | 1377.86            | 2783.49            |
| A_68_P26540062 | chr9:56920055-56920099                            | NM_001110350:-4106      | Sin3a         | PROMOTER               | 1.315                                                        | 1.615                          | 959.36             | 1549.82            | 2.125                          | 816.42             | 1734.67            |
| A_68_P22218905 | chr3:68848719-68848763                            | NM_025863:-76           | Trim59        | PROMOTER               | 1.315                                                        | 3.872                          | 903.90             | 3499.83            | 5.091                          | 841.47             | 4284.26            |
| A_68_P30693866 | chr16:39984614-39984658                           | AK082117:-71            |               | PROMOTER               | 1.315                                                        | 3.050                          | 1025.21            | 3126.43            | 4.011                          | 886.36             | 3554.84            |
| A_68_P21127431 | chr2:34262562-34262606                            | ENSMUST00000147337:-118 |               | PROMOTER               | 1.315                                                        | 2.202                          | 2062.74            | 4541.97            | 2.895                          | 1817.90            | 5263.15            |
| A_68_P27901660 | chr11:70429072-70429116                           | NM_001145537:-301       | 4930544D05Rik | PROMOTER               | 1.314                                                        | 1.840                          | 539.06             | 992.14             | 2.418                          | 454.14             | 1098.33            |
| A_68_P25598323 | chr7:150238635-150238679                          | NM_133655:2             | Cd81          | INSIDE                 | 1.314                                                        | 2.764                          | 445.68             | 1231.72            | 3.631                          | 409.36             | 1486.40            |
| A_68_P23339476 | chr4:136913526-136913570                          | NM_009861:104           | Cdc42         | INSIDE                 | 1.314                                                        | 1.767                          | 1242.91            | 2195.86            | 2.321                          | 1185.61            | 2751.78            |
| A_68_P21103095 | chr2:30271038-30271082                            | NM_007760:208           | Crat          | INSIDE                 | 1.314                                                        | 3.125                          | 1171.17            | 3660.15            | 4.106                          | 992.30             | 4074.11            |
| A_68_P25286994 | chr7:91300218-91300262                            | NM_133722:163           | Fam108c       | INSIDE                 | 1.314                                                        | 2.967                          | 933.15             | 2768.27            | 3.898                          | 884.59             | 3447.80            |
| A_68_P26021244 | chr8:87225675-87225719                            | NM_008535:341           | Lyl1          | INSIDE                 | 1.314                                                        | 1.708                          | 1373.03            | 2345.00            | 2.244                          | 1062.52            | 2383.86            |
| A_68_P24161575 | chr5:145306253-145306297                          | NM_016789:-481          | Nptx2         | PROMOTER               | 1.314                                                        | 1.650                          | 717.78             | 1184.51            | 2.168                          | 601.10             | 1303.28            |
| A_68_P25377990 | chr7:109416158-109416202                          | NM_009287:-157          | Stim1         | PROMOTER               | 1.314                                                        | 1.883                          | 965.18             | 1817.67            | 2.474                          | 1185.89            | 2018.84            |
| A_68_P25182469 | chr7:72516013-72516058                            | NM_001163574:95         | Tjp1          | INSIDE                 | 1.314                                                        | 1.683                          | 1133.77            | 1908.56            | 2.212                          | 1004.05            | 2221.14            |
| A_68_P29733542 | chr14:76814361-76814405                           | NM_207652:-1245         | Tsc22d1       | PROMOTER               | 1.314                                                        | 3.076                          | 405.83             | 1248.14            | 4.042                          | 371.57             | 1501.92            |
| A_68_P23610941 | chr5:37379997-37380041                            | NM_0011716:203          | Wfs1          | INSIDE                 | 1.314                                                        | 2.172                          | 1264.79            | 2747.47            | 2.854                          | 1084.02            | 3093.86            |
| A_68_P31175249 | chr17:39985581-39985625                           | ENSMUST00000062783:170  |               | INSIDE                 | 1.314                                                        | 3.331                          | 23670.85           | 78837.49           | 4.378                          | 17964.65           | 78645.27           |
| A_68_P31951639 | chr19:10680032-10680076                           | NM_015735:-60           | Ddb1          | DIVERGENT_PROMOTER     | 1.313                                                        | 1.880                          | 1892.66            | 3557.63            | 2.468                          | 1408.63            | 3477.00            |
| A_68_P23202060 | chr4:109349261-109349305                          | NM_007983:51            | Faf1          | INSIDE                 | 1.313                                                        | 2.204                          | 899.95             | 1983.17            | 2.893                          | 777.80             | 2249.83            |
| A_68_P28928667 | chr13:32430111-32430155                           | NM_146041:281           | Gm5s          | INSIDE                 | 1.313                                                        | 4.076                          | 1399.23            | 5703.60            | 5.352                          | 1287.51            | 6890.28            |
| A_68_P31866345 | chr18:80909646-80909690                           | NM_001164111:-4756      | Nfatc1        | PROMOTER               | 1.313                                                        | 5.078                          | 3778.50            | 19186.36           | 6.668                          | 3031.32            | 20211.49           |
| A_68_P26253526 | chr8:128258037-128258081                          | NM_025636:-44           | Ntscr         | PROMOTER               | 1.313                                                        | 2.307                          | 1712.75            | 3950.85            | 3.028                          | 1416.54            | 4289.92            |
| A_68_P27921383 | chr11:74403548-74403592                           | NM_001015046:90         | Rap1gap2      | INSIDE                 | 1.313                                                        | 1.487                          | 2251.45            | 3348.42            | 1.953                          | 1938.07            | 3785.75            |
| A_68_P21099264 | chr2:29603006-29603050                            | NM_001039086:127789     | Rapgef1       | DOWNSTREAM             | 1.313                                                        | 1.473                          | 1343.02            | 1978.17            | 1.934                          | 1146.35            | 2217.20            |
| A_68_P24428223 | chr6:48547614-48547658                            | NM_001079901:3755       | Repin1        | INSIDE                 | 1.313                                                        | 3.260                          | 927.15             | 3022.57            | 4.281                          | 891.28             | 3815.31            |
| A_68_P27554682 | chr11:3813819-3813863                             | NM_153142:827           | Slc35e4       | INSIDE                 | 1.313                                                        | 2.454                          | 3040.60            | 7460.32            | 3.222                          | 2397.68            | 7725.96            |
| A_68_P32766767 | chrX:153929659-153929703                          | NM_009214:298           | Sms           | INSIDE                 | 1.313                                                        | 4.673                          | 667.05             | 3117.10            | 6.135                          | 514.12             | 3154.30            |
| A_68_P23322941 | chr4:134024349-134024393                          | NM_019641:136           | Stmn1         | INSIDE                 | 1.313                                                        | 2.772                          | 2406.39            | 6671.71            | 3.639                          | 1983.81            | 7219.85            |
| A_68_P28974160 | chr13:40823639-40823683                           | NM_001122948:2152       | Tefap2a       | INSIDE                 | 1.313                                                        | 1.564                          | 846.12             | 1323.49            | 2.054                          | 725.71             | 1490.63            |
| A_68_P26894032 | chr9:123169639-123169683                          | NM_001002267:247        | Tmem158       | INSIDE                 | 1.313                                                        | 2.289                          | 678.84             | 1554.04            | 3.007                          | 672.75             | 2022.72            |
| A_68_P27044453 | chr10:31165715-31165759                           | NM_009413:-9            | Tpd52l1       | PROMOTER               | 1.313                                                        | 1.513                          | 1100.39            | 1664.77            | 1.987                          | 926.62             | 1841.10            |
| A_68_P27086292 | chr10:40604319-40604365                           | NM_031877:1003          | Wasf1         | INSIDE                 | 1.313                                                        | 2.172                          | 298.43             | 648.34             | 2.852                          | 222.37             | 634.28             |
| A_68_P30342957 | chr15:75446831-75446875                           | NM_001044718:-262       | Zfp41         | PROMOTER               | 1.313                                                        | 1.573                          | 939.86             | 1478.67            | 2.066                          | 768.12             | 1586.85            |
| A_68_P28435276 | chr12:53605530-53605574                           | AK041016:550            |               | INSIDE                 | 1.313                                                        | 1.434                          | 4253.89            | 6099.47            | 1.883                          | 3479.01            | 6551.22            |
| A_68_P30425161 | chr15:89259781-89259825                           | NR_004843:556           | BC090627      | INSIDE                 | 1.312                                                        | 1.887                          | 932.87             | 1760.34            | 2.477                          | 882.45             | 2185.42            |
| A_68_P30221122 | chr15:53177633-53177677                           | NM_010162:84            | Ext1          | INSIDE                 | 1.312                                                        | 5.053                          | 1784.62            | 9018.40            | 6.631                          | 1423.70            | 9441.00            |
| A_68_P30399218 | chr15:85036672-85036716                           | NM_010180:257           | Fbln1         | INSIDE                 | 1.312                                                        | 3.036                          | 2885.58            | 8760.74            | 3.985                          | 2518.06            | 10033.89           |
| A_68_P30630403 | chr16:28445216-28445260                           | NM_183064:75            | Fgf12         | INSIDE                 | 1.312                                                        | 1.997                          | 736.69             | 1471.52            | 2.622                          | 666.78             | 1748.01            |
| A_68_P29529256 | chr14:35124536-35124580                           | NM_008133:646           | Glud1         | INSIDE                 | 1.312                                                        | 2.593                          | 2761.15            | 7160.42            | 3.403                          | 2344.05            | 7976.58            |
| A_68_P27292918 | chr10:82092906-82092950                           | NR_037190:342           | Gm9855        | INSIDE                 | 1.312                                                        | 1.873                          | 1576.59            | 2953.07            | 2.457                          | 1368.82            | 3362.63            |
| A_68_P23332339 | chr4:135704351-135704395                          | NM_008321:4636          | Id3           | DOWNSTREAM             | 1.312                                                        | 2.086                          | 3292.78            | 6869.03            | 2.737                          | 2344.87            | 6665.09            |
| A_68_P32451589 | chrX:68303308-68303352                            | NM_001081354:-100       | Mam1d1        | PROMOTER               | 1.312                                                        | 2.609                          | 2091.88            | 5457.59            | 3.423                          | 1122.91            | 3843.46            |
| A_68_P28291797 | chr12:25516152-25516196                           | NM_001083341:-289       | Mboat2        | PROMOTER               | 1.312                                                        | 2.255                          | 720.01             | 1623.57            | 2.958                          | 643.11             | 1902.49            |
| A_68_P20625166 | chr11:134921738-134921782                         | NM_008575:165           | Mdm4          | INSIDE                 | 1.312                                                        | 1.629                          | 2572.84            | 4192.26            | 2.138                          | 2107.13            | 4505.68            |
| A_68_P25962048 | chr8:75072006-75072050                            | NM_027485:181           | Med26         | INSIDE                 | 1.312                                                        | 1.914                          | 984.30             | 1883.76            | 2.510                          | 862.74             | 2165.75            |
| A_68_P21902498 | chr2:179992383-179992427                          | NM_025587:321           | Rps21         | INSIDE                 | 1.312                                                        | 0.355                          | 1571.36            | 558.03             | 0.466                          | 1223.89            | 570.12             |
| A_68_P25499767 | chr7:133435936-133435980                          | NM_145587:19826         | Shk1          | INSIDE                 | 1.312                                                        | 2.745                          | 479.90             | 1317.41            | 3.602                          | 462.47             | 1665.81            |
| A_68_P31054977 | chr17:13185351-13185395                           | NM_001113533:-247       | Wtap          | PROMOTER               | 1.312                                                        | 2.763                          | 919.81             | 2540.98            | 3.626                          | 814.74             | 2953.89            |

| ProbeName      | Target position of probe on CpG island microarray | TargetID              | GeneSymbol    | CpG island Description | Ratio of relative methylation (TiO <sub>2</sub> -NP/Vehicle) | Sham group                                             |                               |                               | TiO <sub>2</sub> -H group                              |                               |                               |
|----------------|---------------------------------------------------|-----------------------|---------------|------------------------|--------------------------------------------------------------|--------------------------------------------------------|-------------------------------|-------------------------------|--------------------------------------------------------|-------------------------------|-------------------------------|
|                |                                                   |                       |               |                        |                                                              | Relative methylation (C <sub>5</sub> /C <sub>3</sub> ) | C <sub>3</sub> signal (Input) | C <sub>5</sub> signal (MeDIP) | Relative methylation (C <sub>5</sub> /C <sub>3</sub> ) | C <sub>3</sub> signal (Input) | C <sub>5</sub> signal (MeDIP) |
| A_68_P27927818 | chr11:75546834-75546878                           | NM_009536:468         | Ywhae         | INSIDE                 | 1.312                                                        | 1.568                                                  | 2704.41                       | 4239.29                       | 2.057                                                  | 2139.87                       | 4401.64                       |
| A_68_P24397788 | chr6:42300448-42300492                            | NM_011777:644         | Zyx           | INSIDE                 | 1.312                                                        | 1.390                                                  | 6127.79                       | 8516.22                       | 1.823                                                  | 4319.77                       | 7876.43                       |
| A_68_P29020719 | chr13:48764304-48764348                           | NM_007526:5922        | Barxl         | DOWNSTREAM             | 1.311                                                        | 1.543                                                  | 1293.74                       | 1996.44                       | 2.023                                                  | 1056.36                       | 2137.42                       |
| A_68_P28109100 | chr11:107655405-107655449                         | NM_019431:352         | Caeng4        | INSIDE                 | 1.311                                                        | 1.578                                                  | 1179.70                       | 1861.41                       | 2.069                                                  | 1816.49                       | 1689.09                       |
| A_68_P27990839 | chr11:86571533-86571577                           | NM_001003908:-560     | Cltc          | PROMOTER               | 1.311                                                        | 2.236                                                  | 964.60                        | 2156.80                       | 2.931                                                  | 813.45                        | 2384.61                       |
| A_68_P20472155 | chr1:99558144-99558188                            | NM_133825:429         | D1Ert622c     | INSIDE                 | 1.311                                                        | 2.736                                                  | 2311.18                       | 6324.15                       | 3.587                                                  | 1928.44                       | 6917.33                       |
| A_68_P25780174 | chr8:36558678-36558722                            | NM_026067:-113        | Eri1          | PROMOTER               | 1.311                                                        | 4.426                                                  | 2740.09                       | 12126.52                      | 5.800                                                  | 2304.83                       | 13367.43                      |
| A_68_P26467131 | chr9:44152207-44152251                            | NM_001110251:-1764    | Hmbs          | PROMOTER               | 1.311                                                        | 1.787                                                  | 1258.18                       | 2248.32                       | 2.342                                                  | 1130.11                       | 2647.15                       |
| A_68_P24634433 | chr6:90686814-90686858                            | NM_001134384:73281    | Iqsec1        | INSIDE                 | 1.311                                                        | 1.400                                                  | 1584.56                       | 2217.82                       | 1.835                                                  | 1407.07                       | 2581.52                       |
| A_68_P24993122 | chr7:19989220-19989264                            | NM_146182:-4037       | Klc3          | DIVERGENT_PROMOTER     | 1.311                                                        | 4.396                                                  | 754.28                        | 3315.96                       | 5.762                                                  | 736.59                        | 4244.40                       |
| A_68_P26920199 | chr10:7401013-7401057                             | NM_010690:28          | Lats1         | INSIDE                 | 1.311                                                        | 3.150                                                  | 1853.00                       | 5836.10                       | 4.128                                                  | 1476.45                       | 6094.39                       |
| A_68_P32252887 | chrX:10294418-10294462                            | NM_001166635:-50      | Mid1ip1       | PROMOTER               | 1.311                                                        | 3.114                                                  | 1184.82                       | 3689.99                       | 4.084                                                  | 805.83                        | 3291.29                       |
| A_68_P28941009 | chr13:34967839-34967883                           | NM_013830:498         | Prpf4b        | INSIDE                 | 1.311                                                        | 2.099                                                  | 2031.31                       | 4263.23                       | 2.751                                                  | 1584.41                       | 4358.19                       |
| A_68_P20598625 | chr1:129999853-129999897                          | NM_181750:-8          | R3hdm1        | DIVERGENT_PROMOTER     | 1.311                                                        | 3.304                                                  | 3560.20                       | 11762.41                      | 4.331                                                  | 2728.21                       | 11815.83                      |
| A_68_P31108132 | chr17:26206355-26206399                           | NM_001162868:-254     | Rab11fip3     | PROMOTER               | 1.311                                                        | 1.420                                                  | 1282.51                       | 1821.54                       | 1.862                                                  | 1102.44                       | 2052.41                       |
| A_68_P23820629 | chr5:77694724-77694768                            | NM_011263:228         | Rest          | INSIDE                 | 1.311                                                        | 1.414                                                  | 2102.35                       | 2973.67                       | 1.855                                                  | 1587.82                       | 2945.14                       |
| A_68_P29454669 | chr14:22569927-22569971                           | NM_026283:196         | Samd8         | INSIDE                 | 1.311                                                        | 2.418                                                  | 983.65                        | 2378.31                       | 3.169                                                  | 888.00                        | 2813.80                       |
| A_68_P31738735 | chr18:58038835-58038879                           | NM_009194:525         | Slc12a2       | INSIDE                 | 1.311                                                        | 3.333                                                  | 750.33                        | 2500.94                       | 4.368                                                  | 660.48                        | 2885.31                       |
| A_68_P31202526 | chr17:45822858-45822902                           | NM_198167:287         | Tmem63b       | INSIDE                 | 1.311                                                        | 1.841                                                  | 1736.21                       | 3195.60                       | 2.414                                                  | 1440.02                       | 3475.98                       |
| A_68_P27836016 | chr11:59102534-59102578                           | NM_009522:1697        | Wnt3a         | INSIDE                 | 1.311                                                        | 2.350                                                  | 661.87                        | 1555.58                       | 3.081                                                  | 560.35                        | 1726.20                       |
| A_68_P22262797 | chr3:79090995-79091039                            | AK032506:-297         |               | PROMOTER               | 1.311                                                        | 2.578                                                  | 1072.39                       | 2764.16                       | 3.378                                                  | 876.55                        | 2961.01                       |
| A_68_P26813047 | chr9:108008622-108008666                          | NM_007567:84070       | Bsn           | INSIDE                 | 1.310                                                        | 3.904                                                  | 730.57                        | 2852.43                       | 5.115                                                  | 618.33                        | 3162.45                       |
| A_68_P26061569 | chr8:94329516-94329560                            | NM_008393:-4265       | Irx3          | PROMOTER               | 1.310                                                        | 1.559                                                  | 3461.01                       | 5396.80                       | 2.043                                                  | 2550.90                       | 5212.10                       |
| A_68_P21419651 | chr2:90758053-90758097                            | NM_025576:133         | Ptpmt1        | INSIDE                 | 1.310                                                        | 1.531                                                  | 608.69                        | 932.20                        | 2.007                                                  | 598.10                        | 1200.20                       |
| A_68_P24061764 | chr5:124981000-124981044                          | NM_021430:378         | Rilpl1        | INSIDE                 | 1.310                                                        | 2.979                                                  | 866.48                        | 2581.37                       | 3.903                                                  | 779.24                        | 3041.07                       |
| A_68_P30467109 | chr15:96884897-96884941                           | NM_027052:1469        | Slc38a4       | INSIDE                 | 1.310                                                        | 1.925                                                  | 802.38                        | 1544.79                       | 2.521                                                  | 700.47                        | 1766.07                       |
| A_68_P24389053 | chr6:40421556-40421600                            | NM_028358:165         | Ssbp1         | INSIDE                 | 1.310                                                        | 1.995                                                  | 804.58                        | 1605.29                       | 2.614                                                  | 633.49                        | 1656.13                       |
| A_68_P28740916 | chr12:112127614-112127658                         | NM_001081057:163      | Tecpr2        | INSIDE                 | 1.310                                                        | 1.754                                                  | 2463.40                       | 4320.80                       | 2.297                                                  | 1891.09                       | 4343.88                       |
| A_68_P23575086 | chr5:31171940-31171984                            | NM_144525:-57         | Tmem214       | PROMOTER               | 1.310                                                        | 2.907                                                  | 2082.81                       | 6054.52                       | 3.809                                                  | 1773.46                       | 6754.90                       |
| A_68_P30351140 | chr15:76741911-76741955                           | NM_001168276:13946    | Zfp647        | INSIDE                 | 1.310                                                        | 2.952                                                  | 809.49                        | 2389.81                       | 3.867                                                  | 706.45                        | 2731.85                       |
| A_68_P24060291 | A_68_P24060291                                    |                       |               | Unknown                | 1.310                                                        | 1.809                                                  | 1709.86                       | 3092.39                       | 2.369                                                  | 1447.76                       | 3429.46                       |
| A_68_P30778641 | chr16:55974831-55974875                           | NR_027965:-122        | 2310061J03Rik | PROMOTER               | 1.309                                                        | 4.204                                                  | 3177.75                       | 13359.67                      | 5.502                                                  | 2637.44                       | 14510.06                      |
| A_68_P28534551 | chr12:74018450-74018494                           | NM_029444:280         | 4930447C04Rik | INSIDE                 | 1.309                                                        | 6.415                                                  | 2114.90                       | 13567.05                      | 8.395                                                  | 1681.74                       | 14118.40                      |
| A_68_P28603261 | chr12:86621337-86621381                           | NM_025421:27          | Acyp1         | INSIDE                 | 1.309                                                        | 1.898                                                  | 979.89                        | 1859.50                       | 2.485                                                  | 866.62                        | 2153.45                       |
| A_68_P31155039 | chr17:34784544-34784588                           | NM_017406:442         | Atf6b         | INSIDE                 | 1.309                                                        | 2.011                                                  | 1755.10                       | 3529.20                       | 2.632                                                  | 1452.66                       | 3823.17                       |
| A_68_P29050817 | chr13:54789017-54789062                           | NM_001146025:130      | Rnf44         | INSIDE                 | 1.309                                                        | 1.521                                                  | 1711.26                       | 2602.18                       | 1.990                                                  | 1451.17                       | 2887.46                       |
| A_68_P29141935 | chr13:73901004-73901048                           | NM_011390:-118        | Slc12a7       | PROMOTER               | 1.309                                                        | 3.097                                                  | 3078.56                       | 9533.25                       | 4.055                                                  | 2465.41                       | 9996.41                       |
| A_68_P21836564 | chr2:167457070-167457114                          | NM_023230:413         | Ube2v1        | INSIDE                 | 1.309                                                        | 1.998                                                  | 893.80                        | 1785.54                       | 2.615                                                  | 710.32                        | 1857.61                       |
| A_68_P30474027 | chr15:98126645-98126689                           | NM_173769:-152        | Zfp641        | PROMOTER               | 1.309                                                        | 1.647                                                  | 1806.18                       | 2975.30                       | 2.157                                                  | 1612.47                       | 3477.93                       |
| A_68_P24603368 | chr6:85105219-85105263                            | ENSMUST0000089584:242 |               | INSIDE                 | 1.309                                                        | 2.108                                                  | 542.87                        | 1144.24                       | 2.758                                                  | 543.40                        | 1498.92                       |
| A_68_P21537143 | chr2:113688822-113688866                          | NM_181416:-26         | Arhgap11a     | PROMOTER               | 1.308                                                        | 2.023                                                  | 1745.08                       | 3529.84                       | 2.646                                                  | 1416.55                       | 3748.74                       |
| A_68_P25506862 | chr7:134852430-134852474                          | NM_009746:-172        | Bcl7c         | DIVERGENT_PROMOTER     | 1.308                                                        | 1.340                                                  | 4589.62                       | 6148.95                       | 1.752                                                  | 3607.14                       | 6320.37                       |
| A_68_P26350530 | chr9:21921461-21921505                            | NM_170777:-2869       | Elof1         | PROMOTER               | 1.308                                                        | 1.675                                                  | 1144.83                       | 1917.14                       | 2.191                                                  | 1033.94                       | 2265.10                       |
| A_68_P29241520 | chr13:96373925-96373969                           | NM_010169:14442       | F2r           | INSIDE                 | 1.308                                                        | 2.828                                                  | 360.86                        | 1020.34                       | 3.699                                                  | 264.49                        | 978.21                        |
| A_68_P28156895 | chr11:115885168-115885212                         | NM_008211:628         | H3f3b         | INSIDE                 | 1.308                                                        | 2.496                                                  | 1356.30                       | 3385.90                       | 3.265                                                  | 1021.21                       | 3334.10                       |
| A_68_P31051121 | chr17:12511550-12511594                           | NM_011948:-46         | Map3k4        | PROMOTER               | 1.308                                                        | 1.861                                                  | 1220.76                       | 2271.33                       | 2.434                                                  | 1135.96                       | 2765.40                       |
| A_68_P27279588 | chr10:79361859-79361903                           | NM_001163276:9803     | Med16         | INSIDE                 | 1.308                                                        | 3.352                                                  | 3661.68                       | 12273.38                      | 4.384                                                  | 2475.52                       | 10853.27                      |
| A_68_P24383012 | chr6:39369835-39369879                            | NM_018810:512         | Mkrr1         | INSIDE                 | 1.308                                                        | 2.097                                                  | 1270.65                       | 2664.88                       | 2.744                                                  | 1120.41                       | 3074.60                       |
| A_68_P22006132 | chr3:26230317-26230361                            | NM_138666:493         | Nlgn1         | INSIDE                 | 1.308                                                        | 1.457                                                  | 1085.32                       | 1581.60                       | 1.906                                                  | 913.41                        | 1741.38                       |
| A_68_P29239503 | chr13:95992534-95992578                           | NM_001170669:449      | Pde8b         | INSIDE                 | 1.308                                                        | 4.875                                                  | 1256.92                       | 6128.05                       | 6.375                                                  | 1102.46                       | 7028.15                       |
| A_68_P21747515 | chr2:151907678-151907722                          | NM_001160410:436      | Scrt2         | INSIDE                 | 1.308                                                        | 1.793                                                  | 351.88                        | 630.97                        | 2.345                                                  | 387.12                        | 907.73                        |

| ProbeName      | Target position of probe on CpG island microarray | TargetID           | GeneSymbol    | CpG island Description | Ratio of relative methylation (TiO <sub>2</sub> -NP/Vehicle) | Sham group                                             |                    |                    | TiO <sub>2</sub> -H group                              |                    |                    |
|----------------|---------------------------------------------------|--------------------|---------------|------------------------|--------------------------------------------------------------|--------------------------------------------------------|--------------------|--------------------|--------------------------------------------------------|--------------------|--------------------|
|                |                                                   |                    |               |                        |                                                              | Relative methylation (C <sub>5</sub> /C <sub>3</sub> ) | Cy3 signal (Input) | Cy5 signal (MeDIP) | Relative methylation (C <sub>5</sub> /C <sub>3</sub> ) | Cy3 signal (Input) | Cy5 signal (MeDIP) |
| A_68_P24973913 | chr7:13556719-13556763                            | NM_178732:5528     | Zfp324        | INSIDE                 | 1.308                                                        | 1.928                                                  | 475.96             | 917.86             | 2.522                                                  | 400.57             | 1010.21            |
| A_68_P24432031 | chr6:49269387-49269431                            | NM_175098:57       | Cecdc126      | INSIDE                 | 1.307                                                        | 2.396                                                  | 1144.52            | 2742.61            | 3.132                                                  | 914.17             | 2863.03            |
| A_68_P25948479 | chr8:72406005-72406049                            | NM_026818:5265     | Cilp2         | INSIDE                 | 1.307                                                        | 2.258                                                  | 521.32             | 1177.35            | 2.952                                                  | 437.85             | 1292.49            |
| A_68_P29747539 | chr14:79125062-79125106                           | NM_001081336:-188  | Dgkh          | PROMOTER               | 1.307                                                        | 3.032                                                  | 1370.59            | 4155.45            | 3.964                                                  | 1149.84            | 4557.84            |
| A_68_P20566311 | chr1:123224390-123224434                          | NM_133748:-73      | Insig2        | PROMOTER               | 1.307                                                        | 1.804                                                  | 475.82             | 858.56             | 2.358                                                  | 419.44             | 989.19             |
| A_68_P21421182 | chr2:91022680-91022724                            | NM_001177720:-3224 | Madd          | PROMOTER               | 1.307                                                        | 3.844                                                  | 2550.05            | 9802.18            | 5.023                                                  | 2460.76            | 12359.94           |
| A_68_P27897811 | chr11:69715610-69715654                           | NM_001013414:253   | Neur14        | INSIDE                 | 1.307                                                        | 1.571                                                  | 1025.78            | 1611.52            | 2.053                                                  | 868.63             | 1783.29            |
| A_68_P23194284 | chr4:107704369-107704413                          | NM_172874:305      | Podn          | INSIDE                 | 1.307                                                        | 3.070                                                  | 1491.45            | 4578.12            | 4.012                                                  | 1262.85            | 5066.12            |
| A_68_P20451967 | chr1:94807773-94807817                            | NM_181405:393      | Rnpep11       | INSIDE                 | 1.307                                                        | 1.690                                                  | 1221.53            | 2064.62            | 2.210                                                  | 1082.61            | 2392.29            |
| A_68_P21635215 | chr2:131318208-131318252                          | NM_001177833:633   | Smox          | INSIDE                 | 1.307                                                        | 1.829                                                  | 1287.57            | 2354.76            | 2.390                                                  | 1042.16            | 2490.54            |
| A_68_P25017144 | chr7:28189868-28189912                            | NM_001199236:-8318 | Spnb4         | PROMOTER               | 1.307                                                        | 4.368                                                  | 2637.82            | 11522.10           | 5.709                                                  | 2009.34            | 11472.27           |
| A_68_P21866929 | chr2:172805440-172805484                          | NM_001083959:120   | Sp011         | INSIDE                 | 1.307                                                        | 2.174                                                  | 268.48             | 583.75             | 2.841                                                  | 239.13             | 679.40             |
| A_68_P28161641 | chr11:116713805-116713849                         | NM_011358:582      | Srsf2         | INSIDE                 | 1.307                                                        | 2.187                                                  | 1722.99            | 3767.62            | 2.858                                                  | 1494.57            | 4271.70            |
| A_68_P31331149 | chr17:71202044-71202088                           | NM_001164075:-992  | Tgif1         | PROMOTER               | 1.307                                                        | 2.750                                                  | 182.62             | 502.16             | 3.593                                                  | 182.47             | 655.54             |
| A_68_P24376582 | chr6:38249064-38249108                            | NM_172467:173      | Zc3hav11      | INSIDE                 | 1.307                                                        | 1.599                                                  | 494.54             | 790.58             | 2.089                                                  | 450.11             | 940.24             |
| A_68_P29938688 | chr14:118836379-118836423                         |                    | Unknown       | Unknown                | 1.307                                                        | 2.306                                                  | 1426.31            | 3288.99            | 3.014                                                  | 1434.90            | 4324.77            |
| A_68_P29258006 | chr13:99274352-99274396                           | AK135687:84239     |               | INSIDE                 | 1.307                                                        | 3.076                                                  | 834.43             | 2566.84            | 4.022                                                  | 690.55             | 2777.20            |
| A_68_P25230182 | chr7:80763065-80763109                            | AK158912:183       |               | INSIDE                 | 1.307                                                        | 1.774                                                  | 1206.56            | 2140.97            | 2.319                                                  | 1047.81            | 2429.74            |
| A_68_P27279428 | chr10:79337495-79337539                           | NM_001170935:-137  | BC005764      | DIVERGENT_PROMOTER     | 1.306                                                        | 2.372                                                  | 2183.07            | 5178.66            | 3.098                                                  | 1624.04            | 5031.35            |
| A_68_P23250424 | chr4:119955496-119955540                          | NM_194060:4348     | Foxo6         | INSIDE                 | 1.306                                                        | 2.779                                                  | 1829.84            | 5085.10            | 3.630                                                  | 1633.22            | 5927.82            |
| A_68_P28152362 | chr11:115119477-115119521                         | NM_010350:9059     | Grin2c        | INSIDE                 | 1.306                                                        | 3.700                                                  | 801.28             | 2964.80            | 4.834                                                  | 682.32             | 3298.37            |
| A_68_P24133865 | chr5:139626414-139626458                          | NM_001081265:260   | Heatr2        | INSIDE                 | 1.306                                                        | 2.927                                                  | 958.50             | 2805.89            | 3.824                                                  | 758.37             | 2899.90            |
| A_68_P25375722 | chr7:108985190-108985234                          | NM_001122739:1126  | Inpp11        | INSIDE                 | 1.306                                                        | 2.147                                                  | 1896.27            | 4071.65            | 2.804                                                  | 1595.66            | 4474.06            |
| A_68_P30482202 | chr15:99602992-99603036                           | NM_028015:-68      | Lass5         | PROMOTER               | 1.306                                                        | 1.807                                                  | 6735.07            | 12172.06           | 2.360                                                  | 5406.62            | 12758.44           |
| A_68_P26548745 | chr9:58430450-58430494                            | NM_009145:426      | Nptn          | INSIDE                 | 1.306                                                        | 1.555                                                  | 1871.33            | 2909.89            | 2.030                                                  | 1597.79            | 3244.12            |
| A_68_P31934661 | chr19:6428357-6428401                             | NM_001205234:9641  | Nrxn2         | INSIDE                 | 1.306                                                        | 3.818                                                  | 704.80             | 2691.21            | 4.988                                                  | 557.67             | 2781.49            |
| A_68_P31943407 | chr19:8831518-8831562                             | NM_016813:-52      | Nxf1          | PROMOTER               | 1.306                                                        | 1.792                                                  | 398.12             | 713.49             | 2.340                                                  | 313.91             | 734.54             |
| A_68_P27901903 | chr11:70468945-70468989                           | NM_011072:-814     | Pfn1          | DIVERGENT_PROMOTER     | 1.306                                                        | 2.751                                                  | 525.83             | 1446.51            | 3.591                                                  | 533.19             | 1914.91            |
| A_68_P21888792 | chr2:177877156-177877200                          | NM_028806:541      | Phactr3       | INSIDE                 | 1.306                                                        | 2.919                                                  | 920.93             | 2687.97            | 3.813                                                  | 776.29             | 2960.04            |
| A_68_P21796699 | chr2:160557598-160557642                          | NM_021280:575      | Pleg1         | INSIDE                 | 1.306                                                        | 2.503                                                  | 539.07             | 1349.13            | 3.269                                                  | 414.39             | 1354.74            |
| A_68_P27080343 | chr10:39452167-39452211                           | NM_011264:223      | Rev3l         | INSIDE                 | 1.306                                                        | 2.939                                                  | 1588.48            | 4668.40            | 3.838                                                  | 1333.46            | 5118.17            |
| A_68_P20759140 | chr1:161161812-161161856                          | NM_011931:-622     | Rfwd2         | PROMOTER               | 1.306                                                        | 2.737                                                  | 1207.32            | 3304.29            | 3.574                                                  | 923.39             | 3300.49            |
| A_68_P31412117 | chr17:86087251-86087295                           | NM_011380:322      | Six2          | INSIDE                 | 1.306                                                        | 2.248                                                  | 430.59             | 968.15             | 2.936                                                  | 459.18             | 1347.94            |
| A_68_P20940733 | chr1:193730478-193730522                          | NM_009579:-159     | Slc30a1       | PROMOTER               | 1.306                                                        | 1.484                                                  | 1923.39            | 2855.27            | 1.939                                                  | 1625.46            | 3152.48            |
| A_68_P31351019 | chr17:74738085-74738129                           | NM_001162870:-220  | Spast         | PROMOTER               | 1.306                                                        | 1.403                                                  | 2396.18            | 3361.47            | 1.832                                                  | 2038.95            | 3735.31            |
| A_68_P27513153 | chr10:122633430-122633474                         | NM_027604:527      | Usp15         | INSIDE                 | 1.306                                                        | 1.918                                                  | 1082.46            | 2076.40            | 2.505                                                  | 1018.49            | 2551.28            |
| A_68_P28931384 | chr13:32894661-32894705                           | NM_030215:784      | Wrnip1        | INSIDE                 | 1.306                                                        | 4.902                                                  | 1428.29            | 7001.87            | 6.403                                                  | 1235.14            | 7908.42            |
| A_68_P23998433 | chr5:113920169-113920213                          | NM_177292:724      | Wscd2         | INSIDE                 | 1.306                                                        | 1.823                                                  | 1093.18            | 1992.80            | 2.380                                                  | 982.35             | 2338.42            |
| A_68_P25947916 | chr8:72298647-72298691                            | NM_177899:142      | Zfp866        | INSIDE                 | 1.306                                                        | 2.110                                                  | 1943.12            | 4099.60            | 2.755                                                  | 1700.55            | 4684.31            |
| A_68_P32537534 | chrX:91368825-91368869                            | NM_001044386:-100  | Zfx           | PROMOTER               | 1.306                                                        | 2.490                                                  | 1262.96            | 3144.78            | 3.253                                                  | 799.63             | 2601.35            |
| A_68_P21773774 | chr2:156688896-156688940                          | NM_026124:61       | 1110008F13Rik | INSIDE                 | 1.305                                                        | 2.679                                                  | 1489.12            | 3989.93            | 3.496                                                  | 1365.87            | 4774.74            |
| A_68_P30382912 | chr15:82176300-82176344                           | NM_026914:-153     | 1500032L24Rik | PROMOTER               | 1.305                                                        | 1.725                                                  | 423.62             | 730.66             | 2.250                                                  | 406.80             | 915.36             |
| A_68_P30348811 | chr15:76341995-76342039                           | NM_010046:232      | Dgat1         | INSIDE                 | 1.305                                                        | 1.592                                                  | 3778.90            | 6017.42            | 2.078                                                  | 2896.67            | 6019.19            |
| A_68_P25328180 | chr7:100229175-100229219                          | NM_021427:808      | Fam181b       | INSIDE                 | 1.305                                                        | 1.902                                                  | 2855.80            | 5432.99            | 2.482                                                  | 2247.40            | 5578.24            |
| A_68_P30786987 | chr16:57549528-57549572                           | NM_001177871:196   | Filip11       | INSIDE                 | 1.305                                                        | 3.618                                                  | 528.72             | 1912.77            | 4.721                                                  | 447.30             | 2111.83            |
| A_68_P24126098 | chr5:137952294-137952338                          | NM_031408:-7791    | Gigyf1        | DIVERGENT_PROMOTER     | 1.305                                                        | 2.386                                                  | 3572.19            | 8524.98            | 3.115                                                  | 2524.09            | 7861.33            |
| A_68_P28043432 | chr11:96144310-96144354                           | NM_010461:1114     | Hoxb8         | INSIDE                 | 1.305                                                        | 3.033                                                  | 699.31             | 2121.00            | 3.959                                                  | 652.06             | 2581.30            |
| A_68_P31208325 | chr17:46817475-46817519                           | NM_001163729:383   | Klhdc3        | INSIDE                 | 1.305                                                        | 2.765                                                  | 2909.67            | 8043.92            | 3.607                                                  | 1830.68            | 6602.56            |
| A_68_P20633481 | chr1:136352243-136352287                          | NM_153128:133      | Klh12         | INSIDE                 | 1.305                                                        | 2.162                                                  | 1130.03            | 2443.36            | 2.823                                                  | 1098.53            | 3100.69            |
| A_68_P25048198 | chr7:35988774-35988818                            | NM_001024707:11568 | Lrp3          | INSIDE                 | 1.305                                                        | 1.997                                                  | 577.52             | 1153.07            | 2.605                                                  | 465.82             | 1213.33            |
| A_68_P21600379 | chr2:124949302-124949346                          | NM_001162417:72    | Myef2         | INSIDE                 | 1.305                                                        | 4.355                                                  | 681.16             | 2966.77            | 5.684                                                  | 653.17             | 3712.39            |



| ProbeName      | Target position of probe on CpG island microarray | TargetID           | GeneSymbol    | CpG island Description | Ratio of relative methylation (TiO <sub>2</sub> -NP/Vehicle) | Sham group                     |                    |                    | TiO <sub>2</sub> -H group      |                    |                    |
|----------------|---------------------------------------------------|--------------------|---------------|------------------------|--------------------------------------------------------------|--------------------------------|--------------------|--------------------|--------------------------------|--------------------|--------------------|
|                |                                                   |                    |               |                        |                                                              | Relative methylation (Cy5/Cy3) | Cy3 signal (Input) | Cy5 signal (MeDIP) | Relative methylation (Cy5/Cy3) | Cy3 signal (Input) | Cy5 signal (MeDIP) |
| A_68_P30939274 | chr16:87354456-87354500                           | NM_001159331:49    | N6amt1        | INSIDE                 | 1.305                                                        | 2.316                          | 635.56             | 1472.17            | 3.022                          | 561.50             | 1696.68            |
| A_68_P30506991 | chr16:3884449-3884493                             | NM_029090:-148     | Nat15         | PROMOTER               | 1.305                                                        | 1.533                          | 1071.15            | 1641.57            | 2.000                          | 850.70             | 1701.57            |
| A_68_P23134316 | chr4:9743897-97439041                             | NM_001122953:-5298 | Nfia          | PROMOTER               | 1.305                                                        | 2.483                          | 2469.27            | 6131.33            | 3.240                          | 2088.40            | 6767.31            |
| A_68_P27165512 | chr10:58276626-58276670                           | NM_172788:542      | Sh3rf3        | INSIDE                 | 1.305                                                        | 2.964                          | 964.44             | 2858.22            | 3.866                          | 2088.92            | 3363.52            |
| A_68_P23594735 | chr5:34856681-34856725                            | NM_139064:-74      | Tnip2         | PROMOTER               | 1.305                                                        | 1.552                          | 2390.18            | 3709.44            | 2.025                          | 2175.02            | 4403.86            |
| A_68_P29880580 | chr14:106505493-106505537                         | NM_198601:100      | Trim52        | INSIDE                 | 1.305                                                        | 2.865                          | 342.53             | 981.33             | 3.740                          | 321.89             | 1203.76            |
| A_68_P20350376 | chr1:74818349-74818393                            | NM_009526:-95      | Wnt6          | PROMOTER               | 1.305                                                        | 1.925                          | 3236.32            | 6229.09            | 2.513                          | 2766.33            | 6950.48            |
| A_68_P29473057 | chr14:25598729-25598773                           |                    |               | Unknown                | 1.305                                                        | 1.632                          | 1487.98            | 2427.70            | 2.129                          | 1240.41            | 2640.40            |
| A_68_P27633575 | chr11:20730716-20730761                           | NM_173752:373      | 1110067D22Rik | INSIDE                 | 1.304                                                        | 1.896                          | 842.63             | 1597.74            | 2.472                          | 656.57             | 1623.15            |
| A_68_P23368575 | chr4:141794726-141794770                          | NM_001109685:568   | 9030409G11Rik | INSIDE                 | 1.304                                                        | 1.618                          | 3562.45            | 5765.55            | 2.111                          | 2853.64            | 6023.44            |
| A_68_P30811311 | chr16:62846647-62846691                           | NM_026577:198      | Arl13b        | INSIDE                 | 1.304                                                        | 1.768                          | 651.89             | 1152.46            | 2.305                          | 619.91             | 1428.60            |
| A_68_P24191337 | chr5:151325172-151325216                          | NM_009765:-3       | Bra2          | DIVERGENT_PROMOTER     | 1.304                                                        | 1.557                          | 865.50             | 1347.75            | 2.030                          | 715.03             | 1451.63            |
| A_68_P30759543 | chr16:52032167-52032211                           | NM_001033238:527   | Ctbb          | INSIDE                 | 1.304                                                        | 1.647                          | 1773.06            | 2920.06            | 2.148                          | 1542.73            | 3313.43            |
| A_68_P25961304 | chr8:74945231-74945275                            | NM_007944:121      | Eps151        | INSIDE                 | 1.304                                                        | 2.169                          | 826.17             | 1792.01            | 2.829                          | 721.15             | 2039.93            |
| A_68_P26343222 | chr9:20446824-20446868                            | NM_013911:404      | Fbx112        | INSIDE                 | 1.304                                                        | 1.988                          | 262.22             | 521.24             | 2.593                          | 235.93             | 611.76             |
| A_68_P30631089 | chr16:28564952-28564996                           | NM_010199:188314   | Fgf12         | INSIDE                 | 1.304                                                        | 1.619                          | 711.88             | 1152.60            | 2.110                          | 726.46             | 1533.19            |
| A_68_P32704838 | chrX:138156435-138156479                          | NM_010572:3304     | Irs4          | INSIDE                 | 1.304                                                        | 1.726                          | 763.07             | 1317.36            | 2.252                          | 405.85             | 913.87             |
| A_68_P20047723 | chr1:14745767-14745811                            | NM_010827:259      | Msc           | INSIDE                 | 1.304                                                        | 2.272                          | 1295.95            | 2944.39            | 2.963                          | 1215.99            | 3603.04            |
| A_68_P30082174 | chr15:25552690-25552734                           | NM_019472:408      | Myo10         | INSIDE                 | 1.304                                                        | 1.503                          | 1828.18            | 2747.95            | 1.960                          | 1526.06            | 2990.33            |
| A_68_P27302615 | chr10:83903859-83903903                           | NM_001004363:-664  | Nuak1         | PROMOTER               | 1.304                                                        | 2.230                          | 252.78             | 563.73             | 2.908                          | 252.44             | 655.66             |
| A_68_P23916646 | chr5:98615304-98615348                            | NM_029947:5439     | Prdm8         | INSIDE                 | 1.304                                                        | 2.608                          | 773.03             | 2015.71            | 3.401                          | 663.87             | 2257.79            |
| A_68_P25585274 | chr7:148043495-148043539                          | NM_053194:221      | Ric8          | INSIDE                 | 1.304                                                        | 2.247                          | 7898.19            | 17748.54           | 2.931                          | 5357.36            | 15701.91           |
| A_68_P31253473 | chr17:56175813-56175857                           | NM_013664:165      | Sh3gl1        | INSIDE                 | 1.304                                                        | 1.522                          | 1690.98            | 2574.40            | 1.985                          | 1484.33            | 2946.12            |
| A_68_P25412179 | chr7:117365148-117365192                          | NM_009302:-46      | Swap70        | PROMOTER               | 1.304                                                        | 2.077                          | 1858.74            | 3861.00            | 2.708                          | 1517.27            | 4108.26            |
| A_68_P23240689 | chr4:118159149-118159193                          | NM_011587:3284     | Tie1          | INSIDE                 | 1.304                                                        | 3.932                          | 1714.91            | 6742.46            | 5.127                          | 1394.65            | 7150.53            |
| A_68_P27359835 | chr10:93978114-93978158                           | NM_172051:535      | Tmcc3         | INSIDE                 | 1.304                                                        | 2.635                          | 483.16             | 1273.23            | 3.437                          | 593.75             | 2040.93            |
| A_68_P30401287 | chr15:85367949-85367993                           | NM_001163634:40530 | Wnt7b         | INSIDE                 | 1.304                                                        | 1.609                          | 874.13             | 1406.16            | 2.098                          | 795.35             | 1668.37            |
| A_68_P24428351 | chr6:48570207-48570251                            | NM_173429:7050     | Zfp775        | INSIDE                 | 1.304                                                        | 2.279                          | 776.68             | 1769.92            | 2.971                          | 682.04             | 2026.12            |
| A_68_P23279474 | chr4:125998794-125998839                          | NM_133883:131      | Adprhl2       | INSIDE                 | 1.303                                                        | 1.657                          | 1825.59            | 3025.00            | 2.159                          | 1555.04            | 3357.11            |
| A_68_P24816768 | chr6:124695641-124695685                          | NM_007881:10843    | Atn1          | INSIDE                 | 1.303                                                        | 1.954                          | 1543.86            | 3016.46            | 2.547                          | 1275.67            | 3248.71            |
| A_68_P24104853 | chr5:133019620-133019664                          | NM_177047:-1429    | Aut2          | PROMOTER               | 1.303                                                        | 3.198                          | 1277.02            | 4084.02            | 4.169                          | 1095.81            | 4568.02            |
| A_68_P33007787 | chr4_random:127945-127989                         | NM_001033326:18165 | Dhrsx         | INSIDE                 | 1.303                                                        | 3.780                          | 8534.81            | 32260.34           | 4.923                          | 6191.48            | 30483.39           |
| A_68_P22787931 | chr4:24778185-24778229                            | NM_001033531:27    | Klhl32        | INSIDE                 | 1.303                                                        | 3.093                          | 5015.57            | 15512.56           | 4.030                          | 4323.68            | 17426.10           |
| A_68_P25092990 | chr7:52671388-52671432                            | NM_198190:2346     | Ntf5          | INSIDE                 | 1.303                                                        | 1.860                          | 878.37             | 1634.07            | 2.424                          | 695.84             | 1686.60            |
| A_68_P27556014 | chr11:4060531-4060575                             | NM_026175:196      | Sf3a1         | INSIDE                 | 1.303                                                        | 1.357                          | 2523.46            | 3424.69            | 1.769                          | 2025.03            | 3582.09            |
| A_68_P20633021 | chr1:136258633-136258677                          | NM_001042485:-78   | Tmem183a      | PROMOTER               | 1.303                                                        | 4.529                          | 599.66             | 2715.74            | 5.903                          | 491.50             | 2901.34            |
| A_68_P25581866 | chr7:147222199-147222243                          | NM_133755:29       | Tubgp2        | INSIDE                 | 1.303                                                        | 1.499                          | 5556.80            | 8329.12            | 1.953                          | 4306.14            | 8411.40            |
| A_68_P21072309 | chr2:25316230-25316274                            | NM_153557:362      | BC029214      | INSIDE                 | 1.302                                                        | 1.639                          | 2301.75            | 3773.20            | 2.134                          | 1844.86            | 3937.21            |
| A_68_P26234726 | chr8:125154578-125154622                          | NM_001109873:47475 | Cbfa2t3       | INSIDE                 | 1.302                                                        | 3.834                          | 1665.13            | 6384.10            | 4.993                          | 1459.81            | 7289.05            |
| A_68_P27921467 | chr11:74424565-74424610                           | NM_001013784:-8519 | E130309D14Rik | PROMOTER               | 1.302                                                        | 2.774                          | 1201.41            | 3332.57            | 3.611                          | 1111.35            | 4012.87            |
| A_68_P31322349 | chr17:69506595-69506639                           | NM_013813:467      | Epb4.113      | INSIDE                 | 1.302                                                        | 2.372                          | 893.64             | 2119.76            | 3.089                          | 784.38             | 2422.93            |
| A_68_P32397421 | chrX:53985333-53985377                            | NM_001077361:221   | Fhl1          | INSIDE                 | 1.302                                                        | 1.826                          | 675.77             | 1233.67            | 2.378                          | 449.65             | 1069.16            |
| A_68_P21203199 | chr2:49474675-49474719                            | NM_008449:-137     | Kif5c         | PROMOTER               | 1.302                                                        | 3.019                          | 942.50             | 2845.14            | 3.931                          | 728.91             | 2865.30            |
| A_68_P28515343 | chr12:70683664-70683708                           | NM_001033236:329   | Mett21d       | INSIDE                 | 1.302                                                        | 1.463                          | 1751.96            | 2563.34            | 1.905                          | 1419.61            | 2703.68            |
| A_68_P23577231 | chr5:31543485-31543529                            | NM_147201:216      | Nrbp1         | INSIDE                 | 1.302                                                        | 2.442                          | 1253.65            | 3061.53            | 3.181                          | 1041.51            | 3312.58            |
| A_68_P28083321 | chr11:102962810-102962854                         | NM_152813:140      | Plcd3         | INSIDE                 | 1.302                                                        | 1.563                          | 959.01             | 1499.17            | 2.036                          | 910.88             | 1854.35            |
| A_68_P22313617 | chr3:88213719-88213763                            | NM_025928:498      | Pmfl          | INSIDE                 | 1.302                                                        | 1.683                          | 1017.38            | 1712.57            | 2.192                          | 911.68             | 1998.58            |
| A_68_P25576657 | chr7:146434291-146434335                          | NM_001033206:-68   | Pwpp2b        | PROMOTER               | 1.302                                                        | 3.305                          | 245.94             | 812.92             | 4.305                          | 216.44             | 931.77             |
| A_68_P23896677 | chr5:93327277-93327321                            | NM_001077596:275   | Shroom3       | INSIDE                 | 1.302                                                        | 0.417                          | 1538.47            | 641.67             | 0.543                          | 1389.54            | 754.44             |
| A_68_P28050112 | chr11:97223519-97223563                           | NM_138657:-324     | Socs7         | PROMOTER               | 1.302                                                        | 2.092                          | 955.61             | 1999.16            | 2.723                          | 865.71             | 2357.67            |
| A_68_P30572951 | chr16:17278027-17278071                           | NM_177473:1656     | Tmem191c      | INSIDE                 | 1.302                                                        | 3.083                          | 959.55             | 2957.86            | 4.012                          | 791.47             | 3175.76            |

| ProbeName      | Target position of probe on CpG island microarray | TargetID           | GeneSymbol    | CpG island Description | Ratio of relative methylation (TiO <sub>2</sub> -NP/Vehicle) | Sham group                     |                    |                    | TiO <sub>2</sub> -H group      |                    |                    |
|----------------|---------------------------------------------------|--------------------|---------------|------------------------|--------------------------------------------------------------|--------------------------------|--------------------|--------------------|--------------------------------|--------------------|--------------------|
|                |                                                   |                    |               |                        |                                                              | Relative methylation (Cy5/Cy3) | Cy3 signal (Input) | Cy5 signal (MeDIP) | Relative methylation (Cy5/Cy3) | Cy3 signal (Input) | Cy5 signal (MeDIP) |
| A_68_P31102168 | chr17:25325357-25325401                           | NM_001197024:34    | Unkl          | INSIDE                 | 1.302                                                        | 1.874                          | 17884.60           | 33513.20           | 2.439                          | 14385.30           | 35092.38           |
| A_68_P23998981 | chr5:114037991-114038035                          | NM_177292:118546   | Wscd2         | INSIDE                 | 1.302                                                        | 1.884                          | 1419.41            | 2673.71            | 2.452                          | 1108.04            | 2716.51            |
| A_68_P28872465 | chr13:21454901-21454949                           | NM_016684:236      | Zscan12       | INSIDE                 | 1.302                                                        | 4.229                          | 190.27             | 804.69             | 5.505                          | 229.88             | 1265.40            |
| A_68_P24026284 | chr5:118830994-118831046                          |                    |               | Unknown                | 1.302                                                        | 7.064                          | 3039.22            | 21468.34           | 9.200                          | 2114.52            | 19453.68           |
| A_68_P23756663 | chr5:65884143-65884187                            | NM_133697:-90      | 1110003E01Rik | PROMOTER               | 1.301                                                        | 1.653                          | 1056.90            | 1747.18            | 2.151                          | 923.78             | 1987.37            |
| A_68_P25502308 | chr7:133942826-133942870                          | NM_007438:-80      | Aldoa         | PROMOTER               | 1.301                                                        | 1.675                          | 1348.95            | 2259.19            | 2.178                          | 1154.28            | 2514.55            |
| A_68_P31125954 | chr17:29235470-29235514                           | NM_007669:4776     | Cdkn1a        | INSIDE                 | 1.301                                                        | 2.115                          | 423.86             | 896.58             | 2.751                          | 346.27             | 952.67             |
| A_68_P26779715 | chr9:102255528-102255572                          | NM_001168296:1473  | Ephb1         | INSIDE                 | 1.301                                                        | 1.468                          | 1362.93            | 2001.41            | 1.911                          | 1140.77            | 2180.07            |
| A_68_P24053334 | chr5:123438191-123438235                          | NM_001005866:330   | Kdm2b         | INSIDE                 | 1.301                                                        | 1.681                          | 534.29             | 898.18             | 2.188                          | 420.14             | 919.08             |
| A_68_P21206004 | chr2:49921862-49921906                            | NM_177139:-97      | Lypd6         | PROMOTER               | 1.301                                                        | 1.944                          | 2140.56            | 4161.88            | 2.529                          | 1892.45            | 4785.49            |
| A_68_P27971522 | chr11:83256374-83256418                           | NM_080453:20067    | Mmp28         | INSIDE                 | 1.301                                                        | 1.722                          | 1594.45            | 2746.09            | 2.241                          | 1420.01            | 3181.84            |
| A_68_P21107808 | chr2:31102041-31102085                            | NM_019681:620      | Nes1          | INSIDE                 | 1.301                                                        | 2.203                          | 4033.24            | 8886.65            | 2.866                          | 2788.72            | 7991.54            |
| A_68_P29322927 | chr13:111184916-111184960                         | NM_152804:-313     | Plk2          | PROMOTER               | 1.301                                                        | 2.174                          | 1925.22            | 4185.78            | 2.828                          | 1678.01            | 4746.04            |
| A_68_P24116186 | chr5:135870022-135870066                          | NM_148932:372      | Pom121        | INSIDE                 | 1.301                                                        | 2.460                          | 1585.33            | 3899.91            | 3.201                          | 1422.46            | 4553.49            |
| A_68_P31633220 | chr18:38456665-38456709                           | NM_001164621:228   | Rnf14         | INSIDE                 | 1.301                                                        | 2.208                          | 824.12             | 1819.88            | 2.872                          | 707.00             | 2030.75            |
| A_68_P31682248 | chr18:47528673-47528717                           | NM_018744:-172     | Sema6a        | PROMOTER               | 1.301                                                        | 2.837                          | 1347.16            | 3822.26            | 3.692                          | 1134.67            | 4188.72            |
| A_68_P31207580 | chr17:46692523-46692567                           | NM_020493:567      | Srf           | INSIDE                 | 1.301                                                        | 3.279                          | 1018.20            | 3338.54            | 4.266                          | 800.24             | 3414.08            |
| A_68_P28611534 | chr12:88019825-88019869                           | NM_177354:197      | Vash1         | INSIDE                 | 1.301                                                        | 2.747                          | 924.25             | 2539.26            | 3.575                          | 776.70             | 2776.44            |
| A_68_P21013703 | chr2:12933075-12933119                            | NM_153155:-605     | C1ql3         | PROMOTER               | 1.300                                                        | 3.616                          | 572.94             | 2071.92            | 4.702                          | 490.01             | 2303.87            |
| A_68_P31156013 | chr17:34974519-34974563                           | NM_001163770:577   | Dom3z         | INSIDE                 | 1.300                                                        | 1.778                          | 2885.14            | 5128.43            | 2.310                          | 2354.92            | 5440.15            |
| A_68_P25051003 | chr7:36539278-36539322                            | NM_178704:173      | Dpy19l3       | INSIDE                 | 1.300                                                        | 1.902                          | 952.63             | 1811.46            | 2.472                          | 758.51             | 1874.71            |
| A_68_P29241105 | chr13:96294931-96294975                           | NM_007974:243      | F2r1l         | INSIDE                 | 1.300                                                        | 1.839                          | 4385.47            | 8064.38            | 2.391                          | 3503.02            | 8375.69            |
| A_68_P31769413 | chr18:63545818-63545864                           | NM_001039485:997   | Fam38b        | INSIDE                 | 1.300                                                        | 2.155                          | 1116.41            | 2406.13            | 2.802                          | 928.60             | 2602.19            |
| A_68_P32467043 | chrX:71492064-71492108                            | NM_010227:-213     | Flna          | DIVERGENT_PROMOTER     | 1.300                                                        | 1.615                          | 1616.91            | 2611.92            | 2.100                          | 692.07             | 1453.66            |
| A_68_P20235844 | chr1:54251715-54251759                            | NM_001001883:142   | Hecw2         | INSIDE                 | 1.300                                                        | 2.138                          | 1070.30            | 2288.34            | 2.778                          | 884.86             | 2458.49            |
| A_68_P25995580 | chr8:82162925-82162969                            | NM_001081164:-628  | Otud4         | PROMOTER               | 1.300                                                        | 1.462                          | 1863.58            | 2724.21            | 1.900                          | 1652.60            | 3140.65            |
| A_68_P25655776 | chr8:11478793-11478843                            | NM_011227:-319     | Rab20         | PROMOTER               | 1.300                                                        | 6.779                          | 5575.04            | 37790.58           | 8.812                          | 3586.03            | 31600.33           |
| A_68_P25669970 | chr8:13676888-13676932                            | NM_009025:677      | Rasa3         | INSIDE                 | 1.300                                                        | 3.010                          | 1860.86            | 5601.74            | 3.912                          | 1384.53            | 5416.69            |
| A_68_P31924878 | chr19:4756662-4756706                             | NM_025717:160      | Rbm4b         | INSIDE                 | 1.300                                                        | 3.042                          | 3025.38            | 9203.08            | 3.954                          | 2336.29            | 9236.68            |
| A_68_P21117161 | chr2:32597158-32597202                            | NM_013781:20589    | Sh2d3c        | INSIDE                 | 1.300                                                        | 2.954                          | 1767.17            | 5219.89            | 3.840                          | 1512.15            | 5806.58            |
| A_68_P24940169 | chr6:148393095-148393139                          | NM_198967:-242     | Tmct1         | PROMOTER               | 1.300                                                        | 1.421                          | 1414.33            | 2010.22            | 1.847                          | 1231.52            | 2275.00            |
| A_68_P20886544 | chr1:184339098-184339142                          | NM_173378:-177     | Trp53bp2      | PROMOTER               | 1.300                                                        | 1.665                          | 1389.32            | 2312.89            | 2.165                          | 1177.55            | 2549.02            |
| A_68_P28058995 | chr11:98724946-98724990                           | NM_197940:57       | Wipf2         | INSIDE                 | 1.300                                                        | 4.531                          | 809.41             | 3667.70            | 5.889                          | 712.49             | 4195.57            |
| A_68_P25008229 | chr7:25861867-25861911                            | NM_001168506:-335  | Zfp574        | DIVERGENT_PROMOTER     | 1.300                                                        | 1.489                          | 1186.48            | 1766.74            | 1.936                          | 937.80             | 1815.63            |
| A_68_P28741431 | chr12:112217094-112217138                         | NM_175207:115      | Ankrd9        | INSIDE                 | 1.299                                                        | 1.699                          | 858.63             | 1458.56            | 2.207                          | 827.68             | 1826.75            |
| A_68_P24925471 | chr6:145811847-145811891                          | NM_024469:1992     | Bhlhe41       | INSIDE                 | 1.299                                                        | 1.519                          | 593.93             | 901.98             | 1.973                          | 574.00             | 1132.46            |
| A_68_P29698999 | chr14:70474927-70474971                           | NM_018781:-2303    | Egr3          | PROMOTER               | 1.299                                                        | 1.888                          | 650.22             | 1227.78            | 2.453                          | 546.97             | 1341.85            |
| A_68_P22128838 | chr3:51081294-51081338                            | NM_023502:48593    | Eif2          | INSIDE                 | 1.299                                                        | 3.797                          | 7622.44            | 28944.50           | 4.934                          | 5912.64            | 29171.62           |
| A_68_P23145560 | chr4:99324186-99324230                            | NM_010425:1219     | Foxd3         | INSIDE                 | 1.299                                                        | 3.025                          | 1622.99            | 4910.14            | 3.931                          | 1407.31            | 5532.08            |
| A_68_P26245549 | chr8:126958481-126958525                          | NM_171824:-666     | Pgbd5         | PROMOTER               | 1.299                                                        | 5.258                          | 1079.47            | 5675.36            | 6.628                          | 826.03             | 5640.24            |
| A_68_P21608665 | chr2:126378771-126378815                          | NM_011978:33       | Slc27a2       | INSIDE                 | 1.299                                                        | 1.465                          | 2040.52            | 2989.91            | 1.903                          | 1645.65            | 3132.43            |
| A_68_P22324936 | chr3:90193265-90193309                            | NM_011988:563      | Slc27a3       | INSIDE                 | 1.299                                                        | 1.784                          | 1399.12            | 2496.61            | 2.319                          | 1273.93            | 2953.66            |
| A_68_P21754953 | chr2:153269988-153270032                          | NM_001001986:205   | 8430427H17Rik | INSIDE                 | 1.298                                                        | 6.644                          | 1832.36            | 12174.31           | 8.625                          | 1581.83            | 13643.01           |
| A_68_P29940447 | chr14:119104917-119104961                         | NM_001033336:503   | Abcc4         | INSIDE                 | 1.298                                                        | 0.429                          | 1647.64            | 707.21             | 0.557                          | 1343.33            | 748.52             |
| A_68_P31341454 | chr17:72953064-72953108                           | NM_007439:561      | Alk           | INSIDE                 | 1.298                                                        | 1.589                          | 1209.55            | 1921.98            | 2.063                          | 1060.01            | 2186.56            |
| A_68_P31766433 | chr18:63081950-63081994                           | NM_133237:-8       | Apedd1        | PROMOTER               | 1.298                                                        | 2.567                          | 292.40             | 750.54             | 3.331                          | 230.41             | 767.45             |
| A_68_P22186543 | chr3:62143850-62143894                            | NM_001081295:1174  | Arhgef26      | INSIDE                 | 1.298                                                        | 1.668                          | 2148.51            | 3583.69            | 2.165                          | 1814.32            | 3928.50            |
| A_68_P24631553 | chr6:90259469-90259513                            | NM_027928:15689    | Chst13        | INSIDE                 | 1.298                                                        | 4.268                          | 498.04             | 2125.50            | 5.538                          | 438.54             | 2428.63            |
| A_68_P28175185 | chr11:118860915-118860959                         | NM_001030291:11435 | Enpp7         | DOWNSTREAM             | 1.298                                                        | 2.472                          | 1553.69            | 3840.01            | 3.209                          | 1368.30            | 4390.89            |
| A_68_P20963944 | chr2:3630654-3630698                              | NM_025626:-53      | Fam107b       | PROMOTER               | 1.298                                                        | 1.903                          | 5388.67            | 10253.93           | 2.471                          | 4285.15            | 10587.07           |
| A_68_P21113218 | chr2:31940197-31940241                            | NM_175511:-993     | Fam78a        | PROMOTER               | 1.298                                                        | 2.621                          | 912.82             | 2392.38            | 3.401                          | 769.12             | 2615.54            |

| ProbeName      | Target position of probe on CpG island microarray | TargetID                | GeneSymbol    | CpG island Description | Ratio of relative methylation (TiO <sub>2</sub> -NP/Vehicle) | Sham group                                             |                               |                               | TiO <sub>2</sub> -H group                              |                               |                               |
|----------------|---------------------------------------------------|-------------------------|---------------|------------------------|--------------------------------------------------------------|--------------------------------------------------------|-------------------------------|-------------------------------|--------------------------------------------------------|-------------------------------|-------------------------------|
|                |                                                   |                         |               |                        |                                                              | Relative methylation (C <sub>5</sub> /C <sub>3</sub> ) | C <sub>3</sub> signal (Input) | C <sub>5</sub> signal (MeDIP) | Relative methylation (C <sub>5</sub> /C <sub>3</sub> ) | C <sub>3</sub> signal (Input) | C <sub>5</sub> signal (MeDIP) |
| A_68_P20405971 | chr1:84836410-84836454                            | NM_025386:17            | Fbxo36        | INSIDE                 | 1.298                                                        | 2.008                                                  | 1333.92                       | 2679.17                       | 2.608                                                  | 1115.54                       | 2908.78                       |
| A_68_P20187368 | chr1:43220801-43220845                            | NM_010212:-16           | Fhl2          | PROMOTER               | 1.298                                                        | 1.716                                                  | 826.80                        | 1418.44                       | 2.226                                                  | 680.97                        | 1516.00                       |
| A_68_P26891188 | chr9:122656242-122656286                          | NM_001199736:-199       | Gm9524        | PROMOTER               | 1.298                                                        | 3.596                                                  | 503.58                        | 1810.73                       | 4.666                                                  | 499.35                        | 2330.23                       |
| A_68_P20640026 | chr1:137429314-137429358                          | NM_173437:52596         | Nav1          | INSIDE                 | 1.298                                                        | 4.238                                                  | 2411.73                       | 10220.24                      | 5.501                                                  | 1980.38                       | 10893.07                      |
| A_68_P21527967 | chr2:112106072-112106116                          | NM_133649:-376          | Slc12a6       | PROMOTER               | 1.298                                                        | 1.451                                                  | 927.01                        | 1345.07                       | 1.884                                                  | 763.41                        | 1437.92                       |
| A_68_P26983380 | chr10:19571274-19571318                           | NM_029529:-31           | Slc35d3       | PROMOTER               | 1.298                                                        | 1.655                                                  | 1673.61                       | 2769.15                       | 2.148                                                  | 1423.42                       | 3057.61                       |
| A_68_P32582485 | chrX:103222578-103222622                          | NM_001109757:-14        | Atp7a         | PROMOTER               | 1.297                                                        | 2.689                                                  | 2236.07                       | 6013.78                       | 3.487                                                  | 1336.28                       | 4659.65                       |
| A_68_P24951826 | chr7:5008661-5008708                              | NM_146178:357           | Ccdc106       | INSIDE                 | 1.297                                                        | 2.334                                                  | 1094.43                       | 2554.25                       | 3.028                                                  | 940.64                        | 2848.39                       |
| A_68_P30379091 | chr15:81523948-81523992                           | NM_001164320:3747       | Chadl         | INSIDE                 | 1.297                                                        | 6.386                                                  | 1931.34                       | 12334.19                      | 8.283                                                  | 1544.16                       | 12790.77                      |
| A_68_P22715806 | chr4:8617250-8617294                              | NM_001081417:-795       | Chd7          | PROMOTER               | 1.297                                                        | 2.698                                                  | 663.02                        | 1788.55                       | 3.499                                                  | 637.84                        | 2232.01                       |
| A_68_P24618503 | chr6:87800411-87800455                            | NM_001109745:668        | Cnbp          | INSIDE                 | 1.297                                                        | 2.147                                                  | 2228.36                       | 4784.93                       | 2.785                                                  | 1852.11                       | 5157.96                       |
| A_68_P28920310 | chr13:31065956-31066000                           | NM_025588:-62           | Exoc2         | PROMOTER               | 1.297                                                        | 1.998                                                  | 630.43                        | 1259.64                       | 2.592                                                  | 542.21                        | 1405.48                       |
| A_68_P31215002 | chr17:48059670-48059714                           | NM_001110824:1889       | Foxp4         | INSIDE                 | 1.297                                                        | 2.173                                                  | 1470.78                       | 3196.60                       | 2.819                                                  | 1103.43                       | 3111.00                       |
| A_68_P25892513 | chr8:60130467-60130511                            | NM_001167981:1364       | Galnt7        | INSIDE                 | 1.297                                                        | 1.735                                                  | 1025.27                       | 1778.59                       | 2.251                                                  | 853.93                        | 1921.79                       |
| A_68_P24518617 | chr6:66846588-66846632                            | NM_001177558:-274       | Gngl2         | PROMOTER               | 1.297                                                        | 2.227                                                  | 2008.43                       | 4472.91                       | 2.888                                                  | 1740.11                       | 5025.49                       |
| A_68_P28043442 | chr11:96145448-96145492                           | NM_010461:2252          | Hoxb8         | INSIDE                 | 1.297                                                        | 2.629                                                  | 2133.62                       | 5608.86                       | 3.410                                                  | 1790.42                       | 6104.62                       |
| A_68_P23415961 | chr4:151383718-151383762                          | NM_001033352:741        | Kihl21        | INSIDE                 | 1.297                                                        | 2.062                                                  | 866.08                        | 1785.56                       | 2.674                                                  | 782.25                        | 2091.51                       |
| A_68_P20883821 | chr1:183772425-183772469                          | NM_133815:86            | Lbr           | INSIDE                 | 1.297                                                        | 1.416                                                  | 1823.70                       | 2581.48                       | 1.837                                                  | 1533.40                       | 2816.29                       |
| A_68_P24591516 | chr6:83065809-83065853                            | NM_020619:331           | Mogs          | INSIDE                 | 1.297                                                        | 1.518                                                  | 1201.75                       | 1824.53                       | 1.969                                                  | 1089.85                       | 2146.46                       |
| A_68_P27890687 | chr11:68505493-68505537                           | NM_175260:98            | Myh10         | INSIDE                 | 1.297                                                        | 1.651                                                  | 7120.46                       | 11758.59                      | 2.142                                                  | 5282.58                       | 11312.67                      |
| A_68_P32240448 | chrX:7419508-7419552                              | NM_138604:574           | Otud5         | INSIDE                 | 1.297                                                        | 1.990                                                  | 821.81                        | 1635.53                       | 2.582                                                  | 546.81                        | 1411.90                       |
| A_68_P23610095 | chr5:37260897-37260941                            | NM_172994:1110          | Ppp2r2c       | INSIDE                 | 1.297                                                        | 3.081                                                  | 947.02                        | 2918.08                       | 3.996                                                  | 824.42                        | 3294.65                       |
| A_68_P23544149 | chr5:24347845-24347889                            | NM_053075:313           | Rheb          | INSIDE                 | 1.297                                                        | 2.678                                                  | 1112.46                       | 2979.11                       | 3.473                                                  | 1003.77                       | 3485.93                       |
| A_68_P28607918 | chr12:87420289-87420333                           | NM_009368:-319          | Tgfb3         | DIVERGENT_PROMOTER     | 1.297                                                        | 1.625                                                  | 1813.93                       | 2947.36                       | 2.107                                                  | 1466.67                       | 3089.80                       |
| A_68_P25728011 | chr8:26712636-26712680                            | NM_001001735:-119       | Whsc111       | DIVERGENT_PROMOTER     | 1.297                                                        | 2.193                                                  | 415.37                        | 910.81                        | 2.844                                                  | 400.11                        | 1137.72                       |
| A_68_P31147211 | chr17:32966831-32966875                           | NM_177359:341           | Zfp799        | INSIDE                 | 1.297                                                        | 1.526                                                  | 1016.46                       | 1551.41                       | 1.980                                                  | 936.86                        | 1855.30                       |
| A_68_P26721431 | chr9:91250815-91250859                            | NM_009573:9801          | Zic1          | DOWNSTREAM             | 1.297                                                        | 2.127                                                  | 558.04                        | 1186.88                       | 2.759                                                  | 439.03                        | 1211.37                       |
| A_68_P30328927 | A_68_P30328927                                    | Unknown                 | Unknown       | Unknown                | 1.297                                                        | 3.543                                                  | 1419.56                       | 5029.41                       | 4.594                                                  | 1232.10                       | 5660.00                       |
| A_68_P32259779 | chrX:11583677-11583722                            | Unknown                 | Unknown       | Unknown                | 1.297                                                        | 1.445                                                  | 836.56                        | 1209.04                       | 1.874                                                  | 377.74                        | 708.00                        |
| A_68_P21840072 | chr2:168032731-168032775                          | NM_009628:-190          | Adnp          | PROMOTER               | 1.296                                                        | 1.524                                                  | 1047.99                       | 1597.65                       | 1.976                                                  | 844.77                        | 1669.09                       |
| A_68_P25030929 | chr7:31099110-31099154                            | NM_198027:5361          | Alkbh6        | INSIDE                 | 1.296                                                        | 2.518                                                  | 821.79                        | 2069.16                       | 3.264                                                  | 711.80                        | 2323.13                       |
| A_68_P29699202 | chr14:70499993-70500037                           | NM_021328:63            | Bin3          | INSIDE                 | 1.296                                                        | 2.412                                                  | 1652.74                       | 3986.13                       | 3.125                                                  | 1445.51                       | 4517.72                       |
| A_68_P27565933 | chr11:5872063-5872107                             | NM_001174053:93667      | Camk2b        | INSIDE                 | 1.296                                                        | 1.572                                                  | 1338.96                       | 2105.01                       | 2.037                                                  | 1049.68                       | 2138.32                       |
| A_68_P29193442 | chr13:85329134-85329178                           | NM_023243:75            | Cenh          | INSIDE                 | 1.296                                                        | 2.881                                                  | 820.59                        | 2363.73                       | 3.734                                                  | 684.11                        | 2554.41                       |
| A_68_P26080011 | chr8:97400151-97400195                            | NM_053246:40            | Dok4          | INSIDE                 | 1.296                                                        | 2.513                                                  | 872.35                        | 2191.88                       | 3.257                                                  | 725.41                        | 2362.32                       |
| A_68_P28687870 | chr12:103057567-103057611                         | NM_011812:-323          | Fbln5         | PROMOTER               | 1.296                                                        | 1.498                                                  | 2819.28                       | 4223.31                       | 1.941                                                  | 2099.17                       | 4074.35                       |
| A_68_P25095551 | chr7:53121751-53121795                            | NM_008172:279           | Grin2d        | INSIDE                 | 1.296                                                        | 1.895                                                  | 489.52                        | 927.67                        | 2.456                                                  | 452.89                        | 1112.39                       |
| A_68_P29628416 | chr14:58143558-58143602                           | NM_145837:-85           | Il17d         | PROMOTER               | 1.296                                                        | 4.077                                                  | 1297.77                       | 5291.50                       | 5.286                                                  | 1291.87                       | 6828.41                       |
| A_68_P26920439 | chr10:7445765-7445809                             | NM_011835:-11           | Katna1        | PROMOTER               | 1.296                                                        | 1.732                                                  | 891.38                        | 1543.67                       | 2.244                                                  | 780.21                        | 1750.68                       |
| A_68_P28480022 | chr12:62624309-62624353                           | NM_178714:-1288         | Lrn5          | PROMOTER               | 1.296                                                        | 2.704                                                  | 1739.40                       | 4702.88                       | 3.503                                                  | 1494.33                       | 5234.42                       |
| A_68_P25512277 | chr7:135883845-135883889                          | NM_145955:77            | Membp         | INSIDE                 | 1.296                                                        | 3.691                                                  | 1193.78                       | 4406.24                       | 4.784                                                  | 1081.71                       | 5174.93                       |
| A_68_P23749117 | chr5:64484174-64484218                            | NM_025700:8             | Pgm1          | INSIDE                 | 1.296                                                        | 1.552                                                  | 2407.28                       | 3735.03                       | 2.011                                                  | 1942.84                       | 3906.57                       |
| A_68_P23597147 | chr5:35291908-35291952                            | NM_173402:-166          | Rgs12         | PROMOTER               | 1.296                                                        | 1.572                                                  | 4666.64                       | 7334.58                       | 2.038                                                  | 3454.23                       | 7038.54                       |
| A_68_P22411696 | chr3:108086789-108086833                          | NM_019972:-239          | Sort1         | PROMOTER               | 1.296                                                        | 1.683                                                  | 2039.03                       | 3431.09                       | 2.180                                                  | 1716.77                       | 3742.63                       |
| A_68_P30680165 | chr16:37384543-37384587                           | NM_001114611:480        | Stxbp51       | INSIDE                 | 1.296                                                        | 1.425                                                  | 1025.40                       | 1461.51                       | 1.847                                                  | 864.69                        | 1597.05                       |
| A_68_P20803942 | chr1:169156556-169156600                          | NM_030724:58680         | Uck2          | INSIDE                 | 1.296                                                        | 7.153                                                  | 4043.17                       | 28920.81                      | 9.270                                                  | 2672.35                       | 24771.66                      |
| A_68_P27564781 | chr11:5640818-5640862                             | NM_178623:339           | Urgcp         | INSIDE                 | 1.296                                                        | 1.533                                                  | 1403.12                       | 2150.98                       | 1.986                                                  | 1221.93                       | 2426.95                       |
| A_68_P23396198 | chr4:148116954-148116998                          | AK142257:4167           | Unknown       | DOWNSTREAM             | 1.296                                                        | 1.966                                                  | 654.23                        | 1286.44                       | 2.548                                                  | 545.79                        | 1390.71                       |
| A_68_P23591272 | chr5:34163692-34163736                            | ENSMUST00000168912:-590 | Unknown       | PROMOTER               | 1.296                                                        | 3.037                                                  | 1264.98                       | 3841.96                       | 3.935                                                  | 1218.12                       | 4793.78                       |
| A_68_P31796719 | chr18:68459858-68459902                           | NM_153794:107           | 4933403F05Rik | INSIDE                 | 1.295                                                        | 2.068                                                  | 1237.67                       | 2559.73                       | 2.678                                                  | 1164.54                       | 3119.03                       |
| A_68_P21224222 | chr2:53050731-53050775                            | NM_022989:-365          | Arl6ip6       | DIVERGENT_PROMOTER     | 1.295                                                        | 2.236                                                  | 707.67                        | 1582.53                       | 2.897                                                  | 611.90                        | 1772.61                       |

| ProbeName      | Target position of probe on CpG island microarray | TargetID               | GeneSymbol | CpG island Description | Ratio of relative methylation (TiO <sub>2</sub> -NP/Vehicle) | Sham group                     |                    |                    | TiO <sub>2</sub> -H group      |                    |                    |
|----------------|---------------------------------------------------|------------------------|------------|------------------------|--------------------------------------------------------------|--------------------------------|--------------------|--------------------|--------------------------------|--------------------|--------------------|
|                |                                                   |                        |            |                        |                                                              | Relative methylation (Cy5/Cy3) | Cy3 signal (Input) | Cy5 signal (MeDIP) | Relative methylation (Cy5/Cy3) | Cy3 signal (Input) | Cy5 signal (MeDIP) |
| A_68_P27143037 | chr10:53317259-53317303                           | NM_025541:514          | Asf1a      | INSIDE                 | 1.295                                                        | 1.670                          | 736.58             | 1230.13            | 2.163                          | 660.03             | 1427.71            |
| A_68_P23609089 | chr5:37086829-37086873                            | NM_001081232:358       | D5Erd579c  | INSIDE                 | 1.295                                                        | 2.159                          | 1653.74            | 3570.45            | 2.796                          | 1483.58            | 4147.77            |
| A_68_P31058444 | chr17:14340634-14340678                           | NM_172826:182          | Dact2      | INSIDE                 | 1.295                                                        | 2.031                          | 1656.22            | 3363.44            | 2.630                          | 1469.67            | 3865.24            |
| A_68_P25021026 | chr7:29083763-29083810                            | NM_007866:3018         | Dil3       | INSIDE                 | 1.295                                                        | 4.332                          | 459.85             | 1992.26            | 5.613                          | 384.31             | 2156.98            |
| A_68_P28185091 | chr11:120392009-120392053                         | NM_008101:-10          | Gegr       | PROMOTER               | 1.295                                                        | 4.453                          | 682.96             | 3041.50            | 5.768                          | 701.11             | 4044.11            |
| A_68_P26443399 | chr9:40263199-40263243                            | NM_172768:129          | Gramd1b    | INSIDE                 | 1.295                                                        | 3.536                          | 634.59             | 2243.80            | 4.579                          | 513.18             | 2349.66            |
| A_68_P23316586 | chr4:132807259-132807303                          | NM_016693:10548        | Map3k6     | INSIDE                 | 1.295                                                        | 2.203                          | 1444.26            | 3181.78            | 2.853                          | 1189.96            | 3394.98            |
| A_68_P32767195 | chrX:154036840-154036884                          | NM_172307:-215         | Mbtps2     | PROMOTER               | 1.295                                                        | 2.882                          | 619.68             | 1786.06            | 3.732                          | 436.69             | 1629.56            |
| A_68_P24171033 | chr5:147775400-147775448                          | NM_029581:-74          | Mif3       | PROMOTER               | 1.295                                                        | 1.775                          | 735.55             | 1305.25            | 2.298                          | 603.64             | 1387.16            |
| A_68_P26159422 | chr8:112392225-112392269                          | NM_001122594:-256      | Phlpp2     | PROMOTER               | 1.295                                                        | 1.681                          | 833.82             | 1401.73            | 2.178                          | 686.14             | 1494.09            |
| A_68_P20022051 | chr1:9290036-9290080                              | NM_027671:-247         | Sntg1      | PROMOTER               | 1.295                                                        | 2.442                          | 1826.03            | 4458.62            | 3.162                          | 1522.51            | 4813.99            |
| A_68_P31108362 | chr17:26250244-26250288                           | NM_021793:6            | Tmem8      | INSIDE                 | 1.295                                                        | 2.581                          | 1564.78            | 4039.30            | 3.344                          | 1306.04            | 4367.59            |
| A_68_P24541202 | chr6:72295118-72295162                            | NM_138592:29           | Usp39      | INSIDE                 | 1.295                                                        | 1.490                          | 1146.19            | 1707.91            | 1.930                          | 1033.63            | 1995.15            |
| A_68_P28430598 | chr12:52694641-52694685                           | NM_001198835:335       | Coch       | INSIDE                 | 1.294                                                        | 2.078                          | 1764.73            | 3667.86            | 2.690                          | 1527.41            | 4109.17            |
| A_68_P24273894 | chr6:18464782-18464826                            | NM_080285:21           | Ctnbp2     | INSIDE                 | 1.294                                                        | 1.778                          | 1181.03            | 2099.74            | 2.301                          | 1018.93            | 2344.69            |
| A_68_P22401913 | chr3:10628533-106285397                           | NM_001093754:26        | Dennd2d    | INSIDE                 | 1.294                                                        | 3.081                          | 1640.47            | 5054.79            | 3.988                          | 1337.17            | 5332.56            |
| A_68_P29310173 | chr13:109004454-109004498                         | NM_029001:-121         | Elovl7     | PROMOTER               | 1.294                                                        | 1.521                          | 1764.64            | 2684.73            | 1.969                          | 1532.75            | 3017.55            |
| A_68_P32454246 | chrX:68808773-68808817                            | NM_008253:-373         | Hmgb3      | PROMOTER               | 1.294                                                        | 3.129                          | 1415.47            | 4428.52            | 4.047                          | 620.21             | 2510.02            |
| A_68_P20883818 | chr1:183772112-183772156                          | NM_133815:398          | Lbr        | INSIDE                 | 1.294                                                        | 1.415                          | 1047.10            | 1481.24            | 1.831                          | 755.53             | 1383.19            |
| A_68_P31876427 | chr18:82645364-82645408                           | NM_001025245:872       | Mbp        | INSIDE                 | 1.294                                                        | 3.051                          | 1072.60            | 3272.01            | 3.947                          | 915.05             | 3611.26            |
| A_68_P25115907 | chr7:57231065-57231109                            | NM_001037906:367       | Nell1      | INSIDE                 | 1.294                                                        | 1.685                          | 891.14             | 1501.82            | 2.180                          | 793.41             | 1729.68            |
| A_68_P31112707 | chr17:26976313-26976357                           | NM_008700:2176         | Nkx2-5     | INSIDE                 | 1.294                                                        | 1.806                          | 369.56             | 667.57             | 2.338                          | 343.85             | 803.90             |
| A_68_P28072819 | chr11:101107662-101107706                         | NM_019444:37           | Ramp2      | INSIDE                 | 1.294                                                        | 2.718                          | 328.94             | 894.00             | 3.517                          | 321.48             | 1130.56            |
| A_68_P28160197 | chr11:116442143-116442187                         | NM_173755:597          | Ube2o      | INSIDE                 | 1.294                                                        | 1.724                          | 3669.26            | 6324.85            | 2.231                          | 2951.83            | 6585.43            |
| A_68_P20372370 | chr1:78654845-78654889                            | NM_001136226:-148      | Utp14b     | PROMOTER               | 1.294                                                        | 1.781                          | 1816.14            | 3234.22            | 2.304                          | 1502.22            | 3460.55            |
| A_68_P32246203 | chrX:8849653-8849697                              | NM_023500:-235         | Xk         | PROMOTER               | 1.294                                                        | 1.906                          | 1202.85            | 2292.65            | 2.466                          | 709.62             | 1750.01            |
| A_68_P27913320 | chr11:72609515-72609559                           | NM_001045536:-191      | Zzef1      | DIVERGENT_PROMOTER     | 1.294                                                        | 3.595                          | 2737.74            | 9842.33            | 4.653                          | 2173.63            | 10113.28           |
| A_68_P32321492 | chrX:34588621-34588665                            | NM_173779:-197         | Ankrd58    | PROMOTER               | 1.293                                                        | 1.601                          | 1448.89            | 2320.04            | 2.071                          | 629.26             | 1303.16            |
| A_68_P31351856 | chr17:74928018-74928062                           | NM_007566:406          | Birc6      | INSIDE                 | 1.293                                                        | 2.064                          | 1818.05            | 3752.79            | 2.669                          | 1579.44            | 4216.08            |
| A_68_P31746195 | chr18:59334616-59334660                           | NM_001081328:-355      | Chsy3      | PROMOTER               | 1.293                                                        | 6.116                          | 886.14             | 5419.96            | 7.909                          | 770.84             | 6096.84            |
| A_68_P28003125 | chr11:88835210-88835254                           | NM_016706:-16          | Coil       | PROMOTER               | 1.293                                                        | 2.782                          | 1351.04            | 3759.26            | 3.599                          | 1133.47            | 4079.33            |
| A_68_P29570463 | chr14:46008598-46008642                           | NM_019425:-149         | Gnpat1     | PROMOTER               | 1.293                                                        | 1.955                          | 3987.71            | 7794.83            | 2.528                          | 3191.70            | 8069.56            |
| A_68_P27270903 | chr10:77364823-77364867                           | NM_145152:437          | Lrrc3      | INSIDE                 | 1.293                                                        | 1.944                          | 834.13             | 1621.50            | 2.514                          | 700.71             | 1761.68            |
| A_68_P20439698 | chr11:92895160-92895204                           | NM_001111312:-121      | Lrrfip1    | PROMOTER               | 1.293                                                        | 1.583                          | 1984.32            | 3141.16            | 2.047                          | 1685.98            | 3450.53            |
| A_68_P21206010 | chr2:49922433-49922477                            | NM_177139:473          | Lypd6      | INSIDE                 | 1.293                                                        | 1.632                          | 1611.87            | 2631.17            | 2.111                          | 1345.53            | 2840.29            |
| A_68_P23229426 | chr4:116136323-116136367                          | NM_001042743:444       | Mast2      | INSIDE                 | 1.293                                                        | 2.187                          | 4856.44            | 10621.51           | 2.827                          | 3932.85            | 11119.76           |
| A_68_P30083236 | chr15:25711164-25711208                           | NM_019472:158882       | Myo10      | INSIDE                 | 1.293                                                        | 2.101                          | 651.35             | 1368.72            | 2.717                          | 574.21             | 1560.17            |
| A_68_P21853413 | chr2:170321616-170321660                          | NM_001013369:-289      | Pfdn4      | PROMOTER               | 1.293                                                        | 1.661                          | 1576.42            | 2618.61            | 2.148                          | 1332.70            | 2862.35            |
| A_68_P31421199 | chr17:87506697-87506741                           | NM_019654:-300         | Socs5      | PROMOTER               | 1.293                                                        | 1.366                          | 3279.11            | 4479.12            | 1.767                          | 2651.67            | 4684.64            |
| A_68_P28307236 | chr12:28024096-28024140                           | NM_009234:3465         | Sox11      | INSIDE                 | 1.293                                                        | 1.883                          | 313.19             | 589.72             | 2.435                          | 261.88             | 637.57             |
| A_68_P20377583 | chr1:79758129-79758173                            | NM_001111279:194       | Wdfy1      | INSIDE                 | 1.293                                                        | 0.392                          | 1311.86            | 514.44             | 0.507                          | 1043.61            | 529.16             |
| A_68_P30570067 | chr16:16600102-16600146                           | ENSMUST00000162671:-53 |            | PROMOTER               | 1.293                                                        | 2.661                          | 368.27             | 979.95             | 3.440                          | 389.81             | 1341.11            |
| A_68_P25354926 | chr7:105457776-105457820                          | NM_025408:239          | Acer3      | INSIDE                 | 1.292                                                        | 2.080                          | 1948.78            | 4053.49            | 2.688                          | 1678.46            | 4512.23            |
| A_68_P24050195 | chr5:122872882-122872926                          | NM_019805:452          | Anapc7     | INSIDE                 | 1.292                                                        | 1.992                          | 532.74             | 1061.01            | 2.573                          | 509.93             | 1311.83            |
| A_68_P32533248 | chrX:90540027-90540071                            | NM_007492:8064         | Arx        | INSIDE                 | 1.292                                                        | 2.283                          | 3043.46            | 6947.97            | 2.950                          | 1738.12            | 5128.00            |
| A_68_P29338045 | chr13:113778996-113779044                         | NM_001081062:1011      | Ceno       | INSIDE                 | 1.292                                                        | 3.069                          | 801.64             | 2460.34            | 3.966                          | 758.75             | 3009.01            |
| A_68_P28575717 | chr12:81535921-81535965                           | NM_177267:1646         | Deaf5      | INSIDE                 | 1.292                                                        | 1.945                          | 761.43             | 1480.71            | 2.512                          | 686.74             | 1725.41            |
| A_68_P32561247 | chrX:97972457-97972501                            | NM_001177780:-131      | Dlg3       | PROMOTER               | 1.292                                                        | 1.830                          | 469.95             | 860.05             | 2.365                          | 296.52             | 701.36             |
| A_68_P26132621 | chr8:107793840-107793884                          | NM_011939:89           | Hsf4       | INSIDE                 | 1.292                                                        | 2.204                          | 951.14             | 2096.24            | 2.846                          | 787.17             | 2240.60            |
| A_68_P26348936 | chr9:21599583-21599627                            | NM_145611:3386         | Kank2      | INSIDE                 | 1.292                                                        | 2.565                          | 376.16             | 964.87             | 3.315                          | 377.67             | 1251.79            |
| A_68_P27535068 | chr10:126725665-126725709                         | NM_033072:141          | Mbd6       | INSIDE                 | 1.292                                                        | 3.226                          | 15005.23           | 48405.64           | 4.169                          | 9062.07            | 37780.41           |

| ProbeName      | Target position of probe on CpG island microarray | TargetID                 | GeneSymbol    | CpG island Description | Ratio of relative methylation (TiO <sub>2</sub> -NP/Vehicle) | Sham group                     |                    |                    | TiO <sub>2</sub> -H group      |                    |                    |
|----------------|---------------------------------------------------|--------------------------|---------------|------------------------|--------------------------------------------------------------|--------------------------------|--------------------|--------------------|--------------------------------|--------------------|--------------------|
|                |                                                   |                          |               |                        |                                                              | Relative methylation (Cy5/Cy3) | Cy3 signal (Input) | Cy5 signal (MeDIP) | Relative methylation (Cy5/Cy3) | Cy3 signal (Input) | Cy5 signal (MeDIP) |
| A_68_P31792975 | chr18:67801303-67801347                           | NM_134138:72             | Psmg2         | INSIDE                 | 1.292                                                        | 2.938                          | 3692.97            | 10849.28           | 3.797                          | 3209.89            | 12187.58           |
| A_68_P32567037 | chrX:99266374-99266418                            | NM_183318:250            | Rgag4         | INSIDE                 | 1.292                                                        | 2.271                          | 2620.59            | 5950.26            | 2.933                          | 1289.14            | 3780.89            |
| A_68_P23322288 | chr4:133898952-133898996                          | NM_001039677:-10         | Slc30a2       | PROMOTER               | 1.292                                                        | 2.352                          | 2360.47            | 5551.59            | 3.038                          | 1847.56            | 5612.36            |
| A_68_P27841611 | chr11:60024072-60024116                           | NM_011480:10012          | Srebfl        | INSIDE                 | 1.292                                                        | 1.462                          | 728.78             | 1065.73            | 1.890                          | 589.49             | 1114.01            |
| A_68_P24287934 | chr6:21802232-21802276                            | NM_173007:261            | Tspan12       | INSIDE                 | 1.292                                                        | 1.959                          | 1609.18            | 3151.72            | 2.531                          | 1361.68            | 3446.17            |
| A_68_P23792610 | chr5:72971627-72971672                            | NM_174877:674            | Zar1          | INSIDE                 | 1.292                                                        | 1.596                          | 1846.35            | 2947.34            | 2.063                          | 1567.68            | 3233.66            |
| A_68_P31206539 | chr17:46520782-46520826                           | NM_207671:90             | Zfp318        | INSIDE                 | 1.292                                                        | 1.937                          | 647.28             | 1253.67            | 2.503                          | 594.61             | 1488.31            |
| A_68_P23962880 | chr5:107125598-107125642                          | NM_026856:229            | Zfp644        | INSIDE                 | 1.292                                                        | 1.447                          | 1081.50            | 1565.06            | 1.869                          | 941.63             | 1760.18            |
| A_68_P24951683 | chr7:4983086-4983130                              | NM_001033383:11131       | Zfp865        | INSIDE                 | 1.292                                                        | 2.731                          | 914.74             | 2498.03            | 3.528                          | 838.17             | 2957.14            |
| A_68_P32977601 | chr12:20821877-20821921                           | NR_015521:-258           | 1700030C10Rik | PROMOTER               | 1.291                                                        | 1.865                          | 483.32             | 901.37             | 2.408                          | 435.24             | 1047.96            |
| A_68_P23424871 | chr4:152806869-152806913                          | NM_001099299:50049       | Ajap1         | INSIDE                 | 1.291                                                        | 2.209                          | 646.85             | 1428.93            | 2.853                          | 532.82             | 1519.98            |
| A_68_P26158883 | chr8:112302603-112302647                          | NM_009677:85             | Ap1g1         | INSIDE                 | 1.291                                                        | 1.508                          | 858.11             | 1294.02            | 1.947                          | 719.87             | 1401.74            |
| A_68_P27489850 | chr10:118676304-118676348                         | NM_027994:785            | Cand1         | INSIDE                 | 1.291                                                        | 3.668                          | 1251.31            | 4589.18            | 4.736                          | 997.46             | 4723.99            |
| A_68_P21907947 | chr2:180763825-180763869                          | NM_015730:10036          | Chrna4        | INSIDE                 | 1.291                                                        | 4.584                          | 4251.08            | 19486.65           | 5.916                          | 2753.77            | 16290.43           |
| A_68_P28156775 | chr11:115866293-115866337                         | NM_001005608:30276       | Itgb4         | INSIDE                 | 1.291                                                        | 3.996                          | 1073.42            | 4289.31            | 5.161                          | 926.98             | 4783.77            |
| A_68_P25678290 | chr8:15028480-15028524                            | NM_029116:17478          | Kbtbd11       | INSIDE                 | 1.291                                                        | 10.300                         | 1395.55            | 14373.56           | 13.299                         | 1184.11            | 15747.21           |
| A_68_P22201292 | chr3:65470413-65470457                            | NM_001037923:278         | Lekr1         | INSIDE                 | 1.291                                                        | 1.788                          | 2086.45            | 3729.58            | 2.307                          | 1775.48            | 4095.78            |
| A_68_P23244387 | chr4:118905895-118905939                          | NM_001042411:-517        | Lepre1        | PROMOTER               | 1.291                                                        | 3.108                          | 1445.26            | 4491.51            | 4.011                          | 1243.96            | 4989.48            |
| A_68_P21006482 | chr2:11423738-11423782                            | NM_001177752:-43         | Pfkfb3        | PROMOTER               | 1.291                                                        | 1.678                          | 388.09             | 651.03             | 2.166                          | 300.46             | 650.91             |
| A_68_P31113240 | chr17:27070276-27070320                           | NM_009343:227            | Phf1          | INSIDE                 | 1.291                                                        | 2.976                          | 1739.48            | 5176.56            | 3.841                          | 1319.91            | 5069.64            |
| A_68_P30397290 | chr15:84684091-84684135                           | NM_001081166:2447        | Phf21b        | INSIDE                 | 1.291                                                        | 1.396                          | 1057.35            | 1475.57            | 1.801                          | 927.49             | 1670.49            |
| A_68_P23767120 | chr5:67698295-67698339                            | NM_178651:121            | Slc30a9       | INSIDE                 | 1.291                                                        | 1.576                          | 868.24             | 1368.65            | 2.036                          | 819.72             | 1668.74            |
| A_68_P21221436 | chr2:52601404-52601448                            | NM_019667:-243           | Stam2         | PROMOTER               | 1.291                                                        | 2.482                          | 1728.93            | 4290.50            | 3.205                          | 1486.04            | 4762.12            |
| A_68_P32241633 | chrX:7651543-7651587                              | NM_011514:322            | Suv39h1       | INSIDE                 | 1.291                                                        | 2.502                          | 941.04             | 2354.96            | 3.232                          | 573.08             | 1852.17            |
| A_68_P27504341 | chr10:121023507-121023551                         | NM_019786:322            | Tbk1          | INSIDE                 | 1.291                                                        | 1.616                          | 848.44             | 1370.73            | 2.086                          | 761.54             | 1588.48            |
| A_68_P26136330 | chr8:108379864-108379908                          | NM_021513:884            | Thap11        | INSIDE                 | 1.291                                                        | 3.037                          | 404.18             | 1227.39            | 3.921                          | 424.57             | 1664.53            |
| A_68_P22749332 | chr4:15193464-15193508                            | NM_181401:520            | Tmem64        | INSIDE                 | 1.291                                                        | 4.049                          | 4310.47            | 17453.31           | 5.229                          | 3107.10            | 16246.49           |
| A_68_P24425523 | chr6:47997406-47997450                            | NM_001081382:685         | Zfp777        | INSIDE                 | 1.291                                                        | 4.365                          | 1994.40            | 8706.21            | 5.635                          | 1644.80            | 9267.80            |
| A_68_P22820143 | chr4:32326406-32326450                            | ENSMUST00000165661:-4279 |               | PROMOTER               | 1.291                                                        | 2.372                          | 3698.56            | 8771.98            | 3.061                          | 2955.79            | 9047.42            |
| A_68_P31112027 | chr17:26853342-26853387                           | NM_029870:770            | A930001N09Rik | INSIDE                 | 1.290                                                        | 4.487                          | 3324.10            | 14916.56           | 5.790                          | 2662.85            | 15417.63           |
| A_68_P31201456 | chr17:45643922-45643966                           | NM_198608:155            | Aars2         | INSIDE                 | 1.290                                                        | 1.501                          | 1304.28            | 1957.55            | 1.937                          | 1141.63            | 2211.06            |
| A_68_P29660043 | chr14:63859471-63859515                           | NM_008092:4605           | Gata4         | INSIDE                 | 1.290                                                        | 5.842                          | 1535.59            | 8970.55            | 7.535                          | 1267.63            | 9551.91            |
| A_68_P24288409 | chr6:21900159-21900203                            | NM_023626:566            | Ing3          | INSIDE                 | 1.290                                                        | 1.750                          | 947.28             | 1657.65            | 2.257                          | 655.93             | 1480.32            |
| A_68_P23154199 | chr4:100937872-100937916                          | NM_146145:-7             | Jak1          | PROMOTER               | 1.290                                                        | 1.360                          | 3369.15            | 4581.96            | 1.754                          | 2919.73            | 5121.17            |
| A_68_P25262926 | chr7:86887923-86887967                            | NM_011068:-33            | Pex11a        | DIVERGENT_PROMOTER     | 1.290                                                        | 1.634                          | 513.12             | 838.21             | 2.107                          | 407.28             | 858.00             |
| A_68_P31302643 | chr17:66132754-66132798                           | NM_001114131:82          | Ppp4r1        | INSIDE                 | 1.290                                                        | 2.181                          | 3218.47            | 7019.49            | 2.814                          | 3034.14            | 8537.48            |
| A_68_P20945776 | chr1:194660855-194660899                          | NM_001177794:17065       | Sertad4       | DOWNSTREAM             | 1.290                                                        | 2.106                          | 2255.20            | 4749.86            | 2.717                          | 1886.12            | 5125.42            |
| A_68_P23768850 | chr5:67999647-67999692                            | NM_001033415:548         | Shisa3        | INSIDE                 | 1.290                                                        | 2.366                          | 1453.55            | 3438.65            | 3.052                          | 1326.83            | 4049.89            |
| A_68_P30467112 | chr15:96885230-96885274                           | NM_027052:1135           | Slc38a4       | INSIDE                 | 1.290                                                        | 1.409                          | 1492.53            | 2103.70            | 1.819                          | 1235.31            | 2246.88            |
| A_68_P20056643 | chr1:16655352-16655396                            | NM_026392:103            | Tmem70        | INSIDE                 | 1.290                                                        | 2.740                          | 389.12             | 1066.34            | 3.535                          | 415.74             | 1469.49            |
| A_68_P27635748 | chr11:21138636-21138680                           | NM_139061:-233           | Vps54         | PROMOTER               | 1.290                                                        | 1.623                          | 1586.76            | 2576.07            | 2.095                          | 1159.94            | 2429.62            |
| A_68_P30024033 | chr15:12754220-12754264                           | NM_029998:170            | 6030458C11Rik | INSIDE                 | 1.289                                                        | 2.789                          | 479.92             | 1338.53            | 3.595                          | 494.68             | 1778.54            |
| A_68_P27977897 | chr11:84326883-84326927                           | NM_019816:99             | Aatf          | INSIDE                 | 1.289                                                        | 2.065                          | 528.48             | 1091.23            | 2.661                          | 504.12             | 1341.36            |
| A_68_P22894883 | chr4:47486977-47487022                            | NM_019998:240            | Alg2          | INSIDE                 | 1.289                                                        | 0.444                          | 1285.77            | 571.38             | 0.573                          | 1172.33            | 671.43             |
| A_68_P24816835 | chr6:124705909-124705953                          | NM_007881:575            | Atn1          | INSIDE                 | 1.289                                                        | 1.789                          | 6594.29            | 11798.51           | 2.307                          | 4687.41            | 10813.01           |
| A_68_P23637946 | chr5:42235648-42235692                            | NM_001081422:-116        | Bod11         | PROMOTER               | 1.289                                                        | 2.274                          | 1021.79            | 2323.87            | 2.931                          | 906.42             | 2656.42            |
| A_68_P31792971 | chr18:67800851-67800895                           | NM_001081073:118         | Cep76         | INSIDE                 | 1.289                                                        | 2.042                          | 727.58             | 1485.36            | 2.632                          | 608.66             | 1602.26            |
| A_68_P24622150 | chr6:88396669-88396713                            | NM_023060:-157           | Eefsec        | PROMOTER               | 1.289                                                        | 2.045                          | 1396.71            | 2855.59            | 2.636                          | 1125.78            | 2967.78            |
| A_68_P28675869 | chr12:100631334-100631378                         | NM_183186:56928          | Foxn3         | INSIDE                 | 1.289                                                        | 1.511                          | 1901.73            | 2872.71            | 1.946                          | 1651.92            | 3215.39            |
| A_68_P28293531 | chr12:25783897-25783941                           | NM_010496:-2961          | Id2           | PROMOTER               | 1.289                                                        | 1.697                          | 431.51             | 732.39             | 2.187                          | 412.28             | 901.78             |
| A_68_P25958333 | chr8:74213329-74213373                            | NM_013564:200            | Ins13         | INSIDE                 | 1.289                                                        | 1.549                          | 1098.02            | 1701.21            | 1.997                          | 1021.72            | 2040.68            |

| ProbeName      | Target position of probe on CpG island microarray | TargetID           | GeneSymbol    | CpG island Description | Ratio of relative methylation (TiO <sub>2</sub> -NP/Vehicle) | Sham group                     |                    |                    | TiO <sub>2</sub> -H group      |                    |                    |
|----------------|---------------------------------------------------|--------------------|---------------|------------------------|--------------------------------------------------------------|--------------------------------|--------------------|--------------------|--------------------------------|--------------------|--------------------|
|                |                                                   |                    |               |                        |                                                              | Relative methylation (Cy5/Cy3) | Cy3 signal (Input) | Cy5 signal (MeDIP) | Relative methylation (Cy5/Cy3) | Cy3 signal (Input) | Cy5 signal (MeDIP) |
| A_68_P31784507 | chr18:66162242-66162286                           | NM_027400:25       | Lman1         | INSIDE                 | 1.289                                                        | 2.079                          | 1219.80            | 2535.98            | 2.681                          | 1092.13            | 2927.77            |
| A_68_P23536416 | chr5:22940274-22940318                            | NM_026984:50       | Mll5          | INSIDE                 | 1.289                                                        | 1.599                          | 1101.95            | 1762.36            | 2.062                          | 866.53             | 1786.43            |
| A_68_P27282702 | chr10:79819562-79819606                           | NM_183152:381      | Plk5          | INSIDE                 | 1.289                                                        | 3.503                          | 1586.64            | 5558.53            | 4.514                          | 1391.65            | 6282.17            |
| A_68_P29055227 | chr13:55573644-55573688                           | NM_001030296:8039  | Prr7          | INSIDE                 | 1.289                                                        | 1.733                          | 780.65             | 1353.25            | 2.234                          | 668.25             | 1492.81            |
| A_68_P21808097 | chr2:162486461-162486505                          | NM_021464:401      | Ptprt         | INSIDE                 | 1.289                                                        | 1.636                          | 462.15             | 756.29             | 2.109                          | 441.86             | 931.93             |
| A_68_P23405235 | chr4:149655313-149655357                          | NM_001085492:-690  | Rere          | PROMOTER               | 1.289                                                        | 1.620                          | 542.77             | 879.49             | 2.089                          | 483.56             | 1010.13            |
| A_68_P26684174 | chr9:83442213-83442257                            | NM_172507:290      | Sh3bgrl2      | INSIDE                 | 1.289                                                        | 2.398                          | 1482.08            | 3553.70            | 3.091                          | 1280.38            | 3958.13            |
| A_68_P27099065 | chr10:42894301-42894345                           | NM_175407:14       | Sobp          | INSIDE                 | 1.289                                                        | 5.791                          | 3868.36            | 22399.91           | 7.462                          | 3050.32            | 22762.69           |
| A_68_P31093840 | chr17:23956472-23956516                           | NM_175229:16341    | Srrm2         | INSIDE                 | 1.289                                                        | 2.139                          | 593.78             | 1270.33            | 2.757                          | 484.74             | 1336.42            |
| A_68_P26626133 | chr9:71959405-71959449                            | NM_011544:200      | Tefl2         | INSIDE                 | 1.289                                                        | 2.619                          | 913.21             | 2391.53            | 3.377                          | 781.52             | 2639.11            |
| A_68_P27812935 | chr11:54769524-54769568                           | NM_001199275:78    | Tnip1         | INSIDE                 | 1.289                                                        | 1.866                          | 1464.37            | 2732.85            | 2.406                          | 1183.47            | 2847.72            |
| A_68_P30570745 | chr16:16871029-16871073                           | NM_011624:67       | Top3b         | INSIDE                 | 1.289                                                        | 1.898                          | 1622.30            | 3079.60            | 2.446                          | 1432.16            | 3503.72            |
| A_68_P26593991 | chr9:66440276-66440320                            | NM_144937:489      | Usp3          | INSIDE                 | 1.289                                                        | 3.852                          | 611.59             | 2355.56            | 4.963                          | 567.75             | 2817.64            |
| A_68_P27504461 | chr10:121043178-121043222                         | NM_001081056:20172 | Xpot          | INSIDE                 | 1.289                                                        | 2.492                          | 2448.39            | 6101.70            | 3.213                          | 1885.14            | 6056.55            |
| A_68_P22834884 | chr4:35173017-35173061                            | NM_001081343:91    | 3110043021Rik | INSIDE                 | 1.288                                                        | 1.629                          | 4198.56            | 6839.04            | 2.097                          | 3555.94            | 7458.02            |
| A_68_P31323856 | chr17:69766821-69766865                           | NR_026848:1056     | C030034I22Rik | INSIDE                 | 1.288                                                        | 0.539                          | 2770.30            | 1492.87            | 0.694                          | 2114.29            | 1467.09            |
| A_68_P29613380 | chr14:55250977-55251021                           | NM_199470:9203     | Cdh24         | INSIDE                 | 1.288                                                        | 1.927                          | 487.69             | 939.59             | 2.482                          | 393.03             | 975.56             |
| A_68_P21566996 | chr2:118752704-118752748                          | NM_028117:494      | Chst14        | INSIDE                 | 1.288                                                        | 1.697                          | 809.38             | 1373.30            | 2.186                          | 689.33             | 1506.57            |
| A_68_P21100053 | chr2:29745687-29745731                            | NM_001177662:126   | Odf2          | INSIDE                 | 1.288                                                        | 1.629                          | 1415.00            | 2305.63            | 2.098                          | 1112.08            | 2333.06            |
| A_68_P23575374 | chr5:31210401-31210445                            | NM_024460:-261     | Ost4          | DIVERGENT_PROMOTER     | 1.288                                                        | 1.409                          | 2672.42            | 3766.08            | 1.814                          | 2171.54            | 3940.14            |
| A_68_P23435280 | chr4:154338579-154338623                          | NM_172990:359      | Pank4         | INSIDE                 | 1.288                                                        | 1.476                          | 1246.41            | 1839.65            | 1.901                          | 991.41             | 1885.04            |
| A_68_P24054155 | chr5:123591978-123592024                          | NM_175092:-9362    | Rhof          | PROMOTER               | 1.288                                                        | 4.707                          | 520.70             | 2450.69            | 6.062                          | 425.67             | 2580.47            |
| A_68_P23331867 | chr4:135609136-135609180                          | NM_025919:128      | Rpl11         | INSIDE                 | 1.288                                                        | 1.717                          | 884.91             | 1519.80            | 2.212                          | 876.07             | 1938.03            |
| A_68_P25412182 | chr7:117365409-117365453                          | NM_009302:214      | Swap70        | INSIDE                 | 1.288                                                        | 1.517                          | 1424.97            | 2161.70            | 1.954                          | 1279.91            | 2500.32            |
| A_68_P32193377 | chr19:55390489-55390533                           | NM_001033573:12    | Zdhhc6        | INSIDE                 | 1.288                                                        | 2.787                          | 1228.55            | 3423.75            | 3.591                          | 1021.82            | 3668.88            |
| A_68_P27212542 | chr10:67011815-67011859                           | NM_001005419:-133  | Ado           | PROMOTER               | 1.287                                                        | 2.556                          | 800.10             | 2044.99            | 3.289                          | 719.22             | 2365.29            |
| A_68_P24674233 | chr6:97567326-97567370                            | NM_145148:303      | Frmd4b        | INSIDE                 | 1.287                                                        | 1.396                          | 1318.38            | 1840.78            | 1.797                          | 1072.41            | 1926.75            |
| A_68_P27278596 | chr10:79198751-79198795                           | NM_008226:19394    | Hcn2          | INSIDE                 | 1.287                                                        | 3.120                          | 1656.68            | 5169.41            | 4.014                          | 1286.43            | 5164.32            |
| A_68_P31149892 | chr17:33786930-33786974                           | NM_001109913:35451 | Hnrmpm        | INSIDE                 | 1.287                                                        | 2.029                          | 795.68             | 1614.10            | 2.611                          | 714.21             | 1865.02            |
| A_68_P23927389 | chr5:100468389-100468433                          | NM_016690:-169     | Hnrpdl        | DIVERGENT_PROMOTER     | 1.287                                                        | 2.305                          | 549.11             | 1265.47            | 2.966                          | 501.84             | 1488.28            |
| A_68_P23323460 | chr4:134107793-134107837                          | NM_029100:267      | Sepr1         | INSIDE                 | 1.287                                                        | 1.600                          | 1384.81            | 2215.86            | 2.060                          | 1151.32            | 2371.60            |
| A_68_P22149790 | chr3:54590088-54590132                            | NM_019483:30607    | Smad9         | INSIDE                 | 1.287                                                        | 3.996                          | 3970.33            | 15864.16           | 5.142                          | 2916.86            | 14999.46           |
| A_68_P29959675 | chr14:122506713-122506757                         | NM_080556:431      | Tm9sf2        | INSIDE                 | 1.287                                                        | 1.677                          | 4349.22            | 7293.71            | 2.158                          | 3970.40            | 8567.06            |
| A_68_P25957925 | chr8:74152799-74152844                            | NM_001029873:42835 | Unc13a        | INSIDE                 | 1.287                                                        | 2.711                          | 195.03             | 528.66             | 3.488                          | 147.91             | 515.87             |
| A_68_P26884594 | chr9:121551770-121551814                          | NM_011703:-41      | Vipr1         | DIVERGENT_PROMOTER     | 1.287                                                        | 1.605                          | 2744.98            | 4405.56            | 2.066                          | 2386.59            | 4931.14            |
| A_68_P24994117 | chr7:20162610-20162654                            | NM_022409:-3       | Zfp296        | DIVERGENT_PROMOTER     | 1.287                                                        | 1.436                          | 1275.47            | 1831.12            | 1.848                          | 932.61             | 1723.28            |
| A_68_P23270666 | chr4:124527512-124527556                          | NM_001142727:440   | 1110065P20Rik | INSIDE                 | 1.286                                                        | 1.856                          | 516.53             | 958.90             | 2.387                          | 469.98             | 1121.94            |
| A_68_P23331196 | chr4:135472765-135472809                          | NM_009924:21468    | Cnr2          | INSIDE                 | 1.286                                                        | 3.113                          | 1739.14            | 5414.11            | 4.002                          | 1210.68            | 4845.61            |
| A_68_P27274155 | chr10:77888554-77888598                           | NM_007793:162      | Cstb          | INSIDE                 | 1.286                                                        | 2.279                          | 1337.01            | 3046.89            | 2.932                          | 1107.48            | 3246.64            |
| A_68_P31145776 | chr17:32629460-32629505                           | NM_177307:39815    | Cyp4f39       | INSIDE                 | 1.286                                                        | 1.667                          | 938.53             | 1564.61            | 2.143                          | 826.79             | 1772.08            |
| A_68_P28924067 | chr13:31717371-31717415                           | NM_010225:-292     | Foxf2         | PROMOTER               | 1.286                                                        | 1.874                          | 3406.06            | 6383.19            | 2.410                          | 2661.31            | 6413.06            |
| A_68_P24864942 | chr6:135015624-135015668                          | NM_181444:-33      | Gprc5a        | PROMOTER               | 1.286                                                        | 2.270                          | 1171.43            | 2659.29            | 2.919                          | 1027.49            | 2999.59            |
| A_68_P21132680 | chr2:35138083-35138127                            | NM_146120:205      | Gsn           | INSIDE                 | 1.286                                                        | 2.038                          | 662.85             | 1351.12            | 2.621                          | 535.83             | 1404.57            |
| A_68_P20267137 | chr1:60100051-60100095                            | NM_027407:-141     | Ica11         | PROMOTER               | 1.286                                                        | 4.945                          | 449.29             | 2221.94            | 6.359                          | 437.87             | 2784.64            |
| A_68_P20007252 | chr1:4797954-4797998                              | NM_008866:3        | Lyp1a1        | INSIDE                 | 1.286                                                        | 2.398                          | 898.17             | 2153.65            | 3.085                          | 813.00             | 2507.85            |
| A_68_P25089969 | chr7:52147509-52147554                            | NM_029365:205      | Med25         | INSIDE                 | 1.286                                                        | 2.642                          | 1439.58            | 3803.16            | 3.398                          | 1241.53            | 4219.11            |
| A_68_P31098020 | chr17:24687629-24687673                           | NM_013630:756      | Pkd1          | INSIDE                 | 1.286                                                        | 1.763                          | 1160.09            | 2045.50            | 2.268                          | 908.85             | 2061.40            |
| A_68_P31121256 | chr17:28369519-28369563                           | NM_011145:-158     | Ppard         | PROMOTER               | 1.286                                                        | 2.187                          | 2258.23            | 4939.36            | 2.812                          | 1803.11            | 5070.55            |
| A_68_P28112586 | chr11:108204519-108204563                         | NM_011101:662      | Prkca         | INSIDE                 | 1.286                                                        | 1.483                          | 698.20             | 1035.70            | 1.907                          | 649.45             | 1238.71            |
| A_68_P29020469 | chr13:48720658-48720702                           | NM_207232:262      | Ptpdc1        | INSIDE                 | 1.286                                                        | 1.442                          | 1021.30            | 1472.37            | 1.853                          | 920.53             | 1706.07            |
| A_68_P32790431 | chrX:159081429-159081473                          | NM_178256:83       | Reps2         | INSIDE                 | 1.286                                                        | 1.498                          | 1210.21            | 1812.57            | 1.926                          | 656.85             | 1264.84            |

| ProbeName      | Target position of probe on CpG island microarray | TargetID               | GeneSymbol    | CpG island Description | Ratio of relative methylation (TiO <sub>2</sub> -NP/Vehicle) | Sham group                                             |                    |                    | TiO <sub>2</sub> -H group                              |                    |                    |
|----------------|---------------------------------------------------|------------------------|---------------|------------------------|--------------------------------------------------------------|--------------------------------------------------------|--------------------|--------------------|--------------------------------------------------------|--------------------|--------------------|
|                |                                                   |                        |               |                        |                                                              | Relative methylation (C <sub>5</sub> /C <sub>3</sub> ) | Cy3 signal (Input) | Cy5 signal (MeDIP) | Relative methylation (C <sub>5</sub> /C <sub>3</sub> ) | Cy3 signal (Input) | Cy5 signal (MeDIP) |
| A_68_P21095252 | chr2:28980951-28980995                            | NM_198033:461          | Setx          | INSIDE                 | 1.286                                                        | 2.330                                                  | 2577.83            | 6006.83            | 2.997                                                  | 2228.89            | 6679.52            |
| A_68_P23896970 | chr5:93371441-93371485                            | NM_001077596:44439     | Shroom3       | INSIDE                 | 1.286                                                        | 2.239                                                  | 211.30             | 473.20             | 2.879                                                  | 226.36             | 651.65             |
| A_68_P21584534 | chr2:121944006-121944050                          | NM_145531:94           | Spg11         | INSIDE                 | 1.286                                                        | 2.395                                                  | 517.18             | 1238.88            | 3.081                                                  | 469.57             | 1446.56            |
| A_68_P25926491 | chr8:67471091-67471135                            | NM_001163747:29        | Tmem192       | INSIDE                 | 1.286                                                        | 3.058                                                  | 3093.79            | 9459.71            | 3.933                                                  | 2762.29            | 10865.37           |
| A_68_P21578171 | chr2:120803024-120803068                          | NM_175285:249          | Tmem62        | INSIDE                 | 1.286                                                        | 2.537                                                  | 1760.52            | 4466.90            | 3.262                                                  | 1632.42            | 5325.09            |
| A_68_P21622287 | chr2:128793258-128793302                          | NM_178404:143          | Zc3h6         | INSIDE                 | 1.286                                                        | 1.565                                                  | 1356.36            | 2122.77            | 2.013                                                  | 1157.20            | 2329.14            |
| A_68_P24919226 | chr6:144730238-144730282                          | ENSMUST00000149451:179 |               | INSIDE                 | 1.286                                                        | 2.859                                                  | 569.33             | 1627.83            | 3.677                                                  | 531.69             | 1955.14            |
| A_68_P29098292 | chr13:64414062-64414106                           | NM_025370:-66          | 1110018J18Rik | PROMOTER               | 1.285                                                        | 1.355                                                  | 2252.35            | 3051.57            | 1.741                                                  | 2041.83            | 3554.11            |
| A_68_P24004678 | chr5:115017216-115017260                          | NM_001004180:-1021     | BC057022      | PROMOTER               | 1.285                                                        | 2.606                                                  | 457.12             | 1191.42            | 3.350                                                  | 396.63             | 1328.67            |
| A_68_P21569032 | chr2:119148703-119148747                          | NM_019454:-2795        | Dll4          | PROMOTER               | 1.285                                                        | 2.490                                                  | 1380.47            | 3437.42            | 3.201                                                  | 1138.41            | 3643.78            |
| A_68_P28703499 | chr12:105712671-105712715                         | NM_010351:-1246        | Gsc           | PROMOTER               | 1.285                                                        | 3.930                                                  | 554.75             | 2180.07            | 5.052                                                  | 491.97             | 2485.21            |
| A_68_P27289026 | chr10:80809521-80809565                           | NM_001163165:3629      | Hmg20b        | INSIDE                 | 1.285                                                        | 4.034                                                  | 2130.08            | 8592.68            | 5.184                                                  | 1626.37            | 8431.46            |
| A_68_P31381046 | chr17:80461343-80461387                           | NM_144802:310          | Hnrp1l        | INSIDE                 | 1.285                                                        | 2.396                                                  | 1112.85            | 2666.55            | 3.080                                                  | 1034.85            | 3187.40            |
| A_68_P29134830 | chr13:72769342-72769386                           | NM_010574:2939         | Irx2          | INSIDE                 | 1.285                                                        | 1.524                                                  | 1010.13            | 1539.14            | 1.957                                                  | 855.34             | 1674.19            |
| A_68_P25954889 | chr8:73437195-73437239                            | NM_173013:7344         | Mtap1s        | INSIDE                 | 1.285                                                        | 2.667                                                  | 786.17             | 2096.91            | 3.428                                                  | 606.40             | 2078.92            |
| A_68_P24434513 | chr6:49772917-49772962                            | NM_023456:212          | Npy           | INSIDE                 | 1.285                                                        | 2.002                                                  | 1364.04            | 2731.28            | 2.573                                                  | 1154.82            | 2970.84            |
| A_68_P30513995 | chr16:5132625-5132669                             | NM_008909:-72          | Ppl           | PROMOTER               | 1.285                                                        | 1.706                                                  | 2103.56            | 3589.45            | 2.192                                                  | 1768.35            | 3875.98            |
| A_68_P29612848 | chr14:55136330-55136374                           | NM_013768:-45          | Prmt5         | PROMOTER               | 1.285                                                        | 1.469                                                  | 1966.21            | 2887.44            | 1.887                                                  | 1657.69            | 3128.79            |
| A_68_P30152573 | chr15:39029866-39029910                           | NM_053271:11           | Rims2         | INSIDE                 | 1.285                                                        | 2.571                                                  | 456.29             | 1172.97            | 3.304                                                  | 412.49             | 1362.80            |
| A_68_P30572148 | chr16:17132335-17132379                           | NM_022324:120          | Sdf2l1        | INSIDE                 | 1.285                                                        | 2.570                                                  | 10290.59           | 26442.68           | 3.303                                                  | 8518.47            | 28132.55           |
| A_68_P23283133 | chr4:126698748-126698792                          | NM_023603:226          | Sfpq          | INSIDE                 | 1.285                                                        | 3.389                                                  | 1636.56            | 5546.32            | 4.354                                                  | 1259.70            | 5484.83            |
| A_68_P27316752 | chr10:86371693-86371737                           | NM_138673:98973        | Stab2         | INSIDE                 | 1.285                                                        | 4.370                                                  | 8421.16            | 36796.62           | 5.617                                                  | 6135.69            | 34464.09           |
| A_68_P23814580 | chr5:76612959-76613003                            | NM_011626:76           | Tmem165       | INSIDE                 | 1.285                                                        | 1.685                                                  | 1388.10            | 2338.44            | 2.164                                                  | 1228.09            | 2657.79            |
| A_68_P21910958 | chr2:181231832-181231876                          | NM_025482:-103         | Tpd5l2        | PROMOTER               | 1.285                                                        | 1.674                                                  | 1133.21            | 1897.55            | 2.152                                                  | 1003.54            | 2159.55            |
| A_68_P27992702 | chr11:86940963-86941007                           | NM_197987:406          | Trim37        | INSIDE                 | 1.285                                                        | 1.772                                                  | 2000.17            | 3544.39            | 2.278                                                  | 1698.44            | 3868.21            |
| A_68_P29220223 | chr13:91881212-91881256                           | NM_028790:109          | Acot12        | INSIDE                 | 1.284                                                        | 1.849                                                  | 419.07             | 774.72             | 2.373                                                  | 421.38             | 1000.07            |
| A_68_P31315916 | chr7:68353564-68353617                            | NM_172964:-142         | Arhgap28      | PROMOTER               | 1.284                                                        | 2.907                                                  | 6597.79            | 19179.08           | 3.733                                                  | 4920.44            | 18368.72           |
| A_68_P20958786 | chr1:196802851-196802895                          | NR_033564:281          | C030002c11rik | INSIDE                 | 1.284                                                        | 1.870                                                  | 1813.53            | 3391.95            | 2.402                                                  | 1373.06            | 3297.79            |
| A_68_P31160530 | chr17:35837893-35837937                           | NM_001198833:-379      | Ddr1          | PROMOTER               | 1.284                                                        | 1.753                                                  | 3487.30            | 6111.93            | 2.250                                                  | 2804.74            | 6311.79            |
| A_68_P24138655 | chr5:140448297-140448346                          | NM_175522:64425        | Elfn1         | INSIDE                 | 1.284                                                        | 6.888                                                  | 2603.74            | 17933.33           | 8.841                                                  | 1842.32            | 16287.80           |
| A_68_P28832915 | chr13:12658494-12658538                           | NM_026184:367          | Ero11b        | INSIDE                 | 1.284                                                        | 1.726                                                  | 2444.08            | 4218.89            | 2.217                                                  | 2013.25            | 4463.20            |
| A_68_P25025740 | chr7:29956305-29956349                            | NM_182696:918          | Ggn           | INSIDE                 | 1.284                                                        | 1.402                                                  | 2724.49            | 3818.64            | 1.800                                                  | 2078.05            | 3739.60            |
| A_68_P20226311 | chr1:52289826-52289870                            | NM_001081081:228       | Gis           | INSIDE                 | 1.284                                                        | 2.898                                                  | 629.51             | 1824.48            | 3.720                                                  | 607.14             | 2258.83            |
| A_68_P32137228 | chr19:45310009-45310053                           | NM_010691:-304         | Lbx1          | PROMOTER               | 1.284                                                        | 1.618                                                  | 679.06             | 1098.88            | 2.078                                                  | 597.44             | 1241.49            |
| A_68_P25089971 | chr7:52147810-52147854                            | NM_029365:-96          | Med25         | DIVERGENT_PROMOTER     | 1.284                                                        | 4.218                                                  | 689.10             | 2906.36            | 5.413                                                  | 637.55             | 3451.35            |
| A_68_P29060112 | chr13:56353073-56353117                           | NM_010896:430          | Neurog1       | INSIDE                 | 1.284                                                        | 1.781                                                  | 401.02             | 714.30             | 2.288                                                  | 372.65             | 852.53             |
| A_68_P23796836 | chr5:73684343-73684387                            | NM_001159889:332       | Ociad1        | INSIDE                 | 1.284                                                        | 1.697                                                  | 3145.98            | 5338.60            | 2.178                                                  | 2595.73            | 5654.75            |
| A_68_P30330338 | chr15:73253176-73253220                           | NM_007982:423          | Ptk2          | INSIDE                 | 1.284                                                        | 1.562                                                  | 2881.52            | 4501.91            | 2.006                                                  | 2153.84            | 4320.10            |
| A_68_P23341301 | chr4:137237373-137237417                          | NM_001081155:-223      | Rap1gap       | PROMOTER               | 1.284                                                        | 1.813                                                  | 816.99             | 1481.18            | 2.328                                                  | 650.14             | 1513.37            |
| A_68_P26324267 | chr9:15514415-15514459                            | NM_172289:224          | Slc36a4       | INSIDE                 | 1.284                                                        | 1.755                                                  | 1059.09            | 1858.68            | 2.253                                                  | 828.99             | 1867.88            |
| A_68_P29070329 | chr13:58009390-58009434                           | NM_001166464:281       | Spock1        | INSIDE                 | 1.284                                                        | 1.595                                                  | 1483.77            | 2366.98            | 2.048                                                  | 1279.68            | 2620.80            |
| A_68_P24919225 | chr6:144730091-144730135                          | ENSMUST00000149451:327 |               | INSIDE                 | 1.284                                                        | 2.637                                                  | 2798.00            | 7377.23            | 3.386                                                  | 2432.07            | 8234.41            |
| A_68_P27187160 | chr10:62114175-62114219                           | NM_053183:-250         | Ddx50         | PROMOTER               | 1.283                                                        | 1.466                                                  | 2415.66            | 3542.06            | 1.881                                                  | 2068.49            | 3890.16            |
| A_68_P25477105 | chr7:129210400-129210444                          | NM_026140:155          | Ears2         | INSIDE                 | 1.283                                                        | 1.671                                                  | 938.09             | 1567.18            | 2.143                                                  | 859.53             | 1842.21            |
| A_68_P25503043 | chr7:134072430-134072474                          | NM_172747:60           | Ketd13        | INSIDE                 | 1.283                                                        | 1.944                                                  | 1767.28            | 3436.40            | 2.495                                                  | 1628.44            | 4062.84            |
| A_68_P23260203 | chr4:122674135-122674181                          | NM_008506:817          | Mycl1         | INSIDE                 | 1.283                                                        | 1.556                                                  | 1779.53            | 2768.55            | 1.997                                                  | 1590.28            | 3175.45            |
| A_68_P21766702 | chr2:155455115-155455159                          | NM_001085378:18189     | Myh7b         | INSIDE                 | 1.283                                                        | 4.662                                                  | 2897.10            | 13506.70           | 5.979                                                  | 2522.48            | 15082.95           |
| A_68_P21565318 | chr2:118489264-118489308                          | NM_001033254:-26       | Pak6          | PROMOTER               | 1.283                                                        | 1.421                                                  | 2123.21            | 3017.70            | 1.823                                                  | 1686.58            | 3074.60            |
| A_68_P21775763 | chr2:157030686-157030730                          | NM_011249:-438         | Rbl1          | PROMOTER               | 1.283                                                        | 5.703                                                  | 735.39             | 4193.93            | 7.318                                                  | 689.12             | 5043.05            |
| A_68_P28550066 | chr12:76836469-76836513                           | NM_030750:226          | Sgpp1         | INSIDE                 | 1.283                                                        | 2.237                                                  | 1332.38            | 2980.47            | 2.869                                                  | 1135.97            | 3259.63            |
| A_68_P23317228 | chr4:132925954-132925998                          | NM_016981:290          | Slc9a1        | INSIDE                 | 1.283                                                        | 2.215                                                  | 251.74             | 557.64             | 2.841                                                  | 217.01             | 616.55             |

| ProbeName      | Target position of probe on CpG island microarray | TargetID                | GeneSymbol    | CpG island Description | Ratio of relative methylation (TiO <sub>2</sub> -NP/Vehicle) | Sham group                     |                    |                    | TiO <sub>2</sub> -H group      |                    |                    |
|----------------|---------------------------------------------------|-------------------------|---------------|------------------------|--------------------------------------------------------------|--------------------------------|--------------------|--------------------|--------------------------------|--------------------|--------------------|
|                |                                                   |                         |               |                        |                                                              | Relative methylation (Cy5/Cy3) | Cy3 signal (Input) | Cy5 signal (MeDIP) | Relative methylation (Cy5/Cy3) | Cy3 signal (Input) | Cy5 signal (MeDIP) |
| A_68_P30980969 | chr16:94592388-94592432                           | NM_009441:65            | Ttc3          | INSIDE                 | 1.283                                                        | 3.535                          | 477.73             | 1688.68            | 4.536                          | 434.97             | 1972.96            |
| A_68_P26166795 | chr8:113669775-113669819                          | ENSMUST00000143719:-416 |               | PROMOTER               | 1.283                                                        | 1.988                          | 556.56             | 1106.28            | 2.549                          | 585.55             | 1492.73            |
| A_68_P26569950 | chr9:62189086-62189130                            | NM_009672:-41           | Anp32a        | PROMOTER               | 1.282                                                        | 1.417                          | 1170.33            | 1657.98            | 1.816                          | 953.72             | 1732.33            |
| A_68_P31108558 | chr17:26275751-26275795                           | NM_001159598:142        | Axin1         | INSIDE                 | 1.282                                                        | 2.387                          | 480.12             | 1145.83            | 3.060                          | 484.65             | 1483.21            |
| A_68_P31926693 | chr19:5068431-5068475                             | NM_054042:375           | Cd248         | INSIDE                 | 1.282                                                        | 1.437                          | 1313.35            | 1887.33            | 1.842                          | 1138.90            | 2097.48            |
| A_68_P25654579 | chr8:11312543-11312587                            | NM_009931:262           | Col4a1        | INSIDE                 | 1.282                                                        | 1.767                          | 1352.72            | 2389.83            | 2.265                          | 1125.80            | 2549.85            |
| A_68_P22134618 | chr3:52073824-52073868                            | NM_019739:1588          | Foxo1         | INSIDE                 | 1.282                                                        | 2.902                          | 460.11             | 1335.16            | 3.721                          | 417.80             | 1554.51            |
| A_68_P29034746 | chr13:51942012-51942056                           | NM_011817:-9            | Gadd45g       | PROMOTER               | 1.282                                                        | 1.683                          | 1520.19            | 2557.89            | 2.158                          | 1305.85            | 2817.78            |
| A_68_P31845028 | chr18:77182898-77182942                           | NM_001039201:-236       | Hdh2          | PROMOTER               | 1.282                                                        | 2.623                          | 2739.00            | 7183.68            | 3.362                          | 2237.94            | 7524.61            |
| A_68_P25678161 | chr8:15011678-15011722                            | NM_029116:676           | Kbtbd11       | INSIDE                 | 1.282                                                        | 1.601                          | 3497.59            | 5599.17            | 2.053                          | 2773.68            | 5694.41            |
| A_68_P30368805 | chr15:79659228-79659272                           | NM_001013360:5513       | Npcd          | INSIDE                 | 1.282                                                        | 3.329                          | 1213.59            | 4040.60            | 4.268                          | 1060.34            | 4525.90            |
| A_68_P24974191 | chr7:13609857-13609901                            | NM_011588:378           | Trim28        | INSIDE                 | 1.282                                                        | 2.417                          | 434.59             | 1050.42            | 3.098                          | 404.21             | 1252.40            |
| A_68_P26350760 | chr9:21992704-21992748                            | NM_001033813:117        | Zfp872        | INSIDE                 | 1.282                                                        | 1.450                          | 5185.29            | 7521.00            | 1.860                          | 4458.97            | 8294.16            |
| A_68_P22900661 | chr4:48552753-48552797                            | NM_001145925:-43        | 5730528L13Rik | PROMOTER               | 1.281                                                        | 2.663                          | 760.51             | 2025.19            | 3.410                          | 719.08             | 2452.02            |
| A_68_P28123544 | chr11:110198866-110198910                         | NM_147219:142           | Abea5         | INSIDE                 | 1.281                                                        | 6.630                          | 420.22             | 2785.88            | 8.490                          | 371.22             | 3151.78            |
| A_68_P25601085 | chr7:150646964-150647018                          | NM_001161624:-35        | Cdkn1c        | PROMOTER               | 1.281                                                        | 2.482                          | 817.22             | 2028.65            | 3.181                          | 657.97             | 2092.98            |
| A_68_P20149812 | chr1:36748527-36748571                            | NM_009942:217           | Cox5b         | INSIDE                 | 1.281                                                        | 1.763                          | 776.35             | 1368.61            | 2.258                          | 718.56             | 1622.34            |
| A_68_P32982444 | chr5:135115258-135115302                          | NM_033561:-82           | Eif4h         | PROMOTER               | 1.281                                                        | 2.151                          | 1948.99            | 4192.90            | 2.757                          | 1917.26            | 5285.47            |
| A_68_P26550039 | chr9:58671843-58671887                            | NM_001081192:546        | Hcn4          | INSIDE                 | 1.281                                                        | 1.486                          | 833.96             | 1238.94            | 1.903                          | 723.06             | 1375.93            |
| A_68_P22450555 | chr3:116364918-116364962                          | NM_008246:655           | Hiat1         | INSIDE                 | 1.281                                                        | 2.274                          | 1120.72            | 2548.42            | 2.912                          | 1009.70            | 2940.54            |
| A_68_P24431597 | chr6:49163986-49164030                            | NM_023670:945           | Igf2bp3       | INSIDE                 | 1.281                                                        | 2.835                          | 532.69             | 1510.07            | 3.632                          | 543.98             | 1975.72            |
| A_68_P24993775 | chr7:20108712-20108756                            | NM_027116:4655          | Nkpd1         | INSIDE                 | 1.281                                                        | 3.360                          | 1843.00            | 6192.76            | 4.305                          | 1558.70            | 6709.62            |
| A_68_P21261721 | chr2:60800858-60800902                            | NM_020296:381           | Rbms1         | INSIDE                 | 1.281                                                        | 1.939                          | 677.62             | 1314.11            | 2.484                          | 603.57             | 1499.36            |
| A_68_P26616836 | chr9:70350943-70350987                            | NM_033604:568           | Rnf11         | INSIDE                 | 1.281                                                        | 1.438                          | 2034.62            | 2924.85            | 1.841                          | 1835.35            | 3378.55            |
| A_68_P31846338 | chr18:77424406-77424450                           | NM_013666:-157          | St8sia5       | PROMOTER               | 1.281                                                        | 1.503                          | 1026.57            | 1543.38            | 1.926                          | 768.49             | 1480.30            |
| A_68_P25009659 | chr7:26100595-26100639                            | NM_183311:9490          | Tmem145       | INSIDE                 | 1.281                                                        | 1.952                          | 1390.26            | 2713.55            | 2.500                          | 986.94             | 2467.19            |
| A_68_P23434596 | chr4:154229972-154230016                          | NM_172878:-314          | Ttc34         | PROMOTER               | 1.281                                                        | 2.702                          | 231.03             | 624.35             | 3.462                          | 199.97             | 692.35             |
| A_68_P28553587 | chr12:77469901-77469960                           | NM_001172104:521        | Zbtb25        | INSIDE                 | 1.281                                                        | 2.065                          | 300.12             | 619.89             | 2.660                          | 227.00             | 600.72             |
| A_68_P32977631 | A_68_P32977631                                    |                         |               | Unknown                | 1.281                                                        | 9.124                          | 4124.59            | 37631.81           | 11.685                         | 2407.80            | 28135.00           |
| A_68_P20770397 | chr1:163100998-163101042                          | NM_028664:28178         | Ankrd45       | DOWNSTREAM             | 1.280                                                        | 1.629                          | 896.20             | 1459.67            | 2.084                          | 790.73             | 1648.05            |
| A_68_P31793797 | chr18:67959692-67959736                           | NM_027556:-46           | Cep192        | PROMOTER               | 1.280                                                        | 2.076                          | 1096.03            | 2275.59            | 2.657                          | 862.87             | 2293.07            |
| A_68_P25948488 | chr8:72407259-72407303                            | NM_026818:4011          | Cilp2         | INSIDE                 | 1.280                                                        | 2.349                          | 1546.96            | 3634.13            | 3.007                          | 1315.23            | 3954.40            |
| A_68_P27996721 | chr11:87684998-87685044                           | NM_007946:4018          | Epx           | INSIDE                 | 1.280                                                        | 3.257                          | 1775.56            | 5782.93            | 4.170                          | 1261.57            | 5260.82            |
| A_68_P22317571 | chr3:88964184-88964228                            | NM_008227:-127          | Hcn3          | DIVERGENT_PROMOTER     | 1.280                                                        | 1.471                          | 2372.16            | 3489.68            | 1.882                          | 1939.90            | 3651.76            |
| A_68_P24589808 | chr6:82724780-82724828                            | NM_013820:-356          | Hk2           | PROMOTER               | 1.280                                                        | 1.737                          | 2190.51            | 3805.46            | 2.223                          | 1486.69            | 3305.12            |
| A_68_P21777849 | chr2:157385874-157385918                          | NM_010923:51            | Nnat          | INSIDE                 | 1.280                                                        | 1.704                          | 3263.33            | 5561.08            | 2.181                          | 2491.35            | 5434.40            |
| A_68_P24785563 | chr6:118146898-118146942                          | NM_001080780:842        | Ret           | INSIDE                 | 1.280                                                        | 2.030                          | 981.12             | 1991.58            | 2.598                          | 906.38             | 2354.71            |
| A_68_P28744650 | chr12:112776572-112776616                         | NR_033168:-2562         | Snora28       | PROMOTER               | 1.280                                                        | 3.566                          | 849.09             | 3028.13            | 4.566                          | 712.73             | 3254.55            |
| A_68_P27985534 | chr11:85645565-85645609                           | NM_009324:-530          | Tbx2          | PROMOTER               | 1.280                                                        | 1.874                          | 1995.43            | 3738.55            | 2.399                          | 1641.74            | 3937.90            |
| A_68_P25182470 | chr7:72516116-72516161                            | NM_001163574:-8         | Tjp1          | PROMOTER               | 1.280                                                        | 2.126                          | 612.28             | 1301.68            | 2.722                          | 852.10             | 1584.61            |
| A_68_P24449885 | chr6:52266776-52266820                            | NR_038163:-1972         | 5730457N03Rik | PROMOTER               | 1.279                                                        | 1.812                          | 2724.97            | 4937.69            | 2.317                          | 2335.42            | 5412.28            |
| A_68_P25274224 | chr7:88974543-88974587                            | NM_146193:-247          | Btdb1         | PROMOTER               | 1.279                                                        | 2.097                          | 1259.03            | 2639.57            | 2.682                          | 1127.74            | 3024.39            |
| A_68_P27284471 | chr10:80097175-80097221                           | NM_001159591:4798       | Csnk1g2       | INSIDE                 | 1.279                                                        | 9.978                          | 276.73             | 2761.19            | 12.765                         | 229.00             | 2923.19            |
| A_68_P31677782 | chr18:46757349-46757393                           | NM_010120:13            | Eif1a         | INSIDE                 | 1.279                                                        | 1.639                          | 3263.57            | 5349.50            | 2.096                          | 2564.13            | 5374.59            |
| A_68_P30817172 | chr16:63857062-63857106                           | NM_010140:6899          | Epha3         | INSIDE                 | 1.279                                                        | 3.489                          | 2355.73            | 8220.17            | 4.464                          | 1910.98            | 8529.90            |
| A_68_P31490816 | chr18:10609789-10609833                           | NM_001081222:540        | Esco1         | INSIDE                 | 1.279                                                        | 5.594                          | 1059.49            | 5927.25            | 7.158                          | 936.50             | 6703.49            |
| A_68_P21389688 | chr2:83652981-83653025                            | NM_175514:118           | Fam171b       | INSIDE                 | 1.279                                                        | 1.837                          | 780.83             | 1434.65            | 2.350                          | 618.57             | 1453.71            |
| A_68_P24793343 | chr6:119429349-119429393                          | NM_133940:-315          | Fbxl14        | PROMOTER               | 1.279                                                        | 2.408                          | 444.06             | 1069.15            | 3.080                          | 406.25             | 1251.09            |
| A_68_P28419952 | chr12:50484269-50484313                           | NM_008241:297           | Foxg1         | INSIDE                 | 1.279                                                        | 1.413                          | 4166.12            | 5886.56            | 1.807                          | 3167.10            | 5724.07            |
| A_68_P28522738 | chr12:71926826-71926870                           | NM_028127:348           | Frmf6         | INSIDE                 | 1.279                                                        | 2.393                          | 600.89             | 1437.64            | 3.061                          | 610.04             | 1867.43            |
| A_68_P25307423 | chr7:96553263-96553307                            | NM_008055:409           | Fzd4          | INSIDE                 | 1.279                                                        | 1.992                          | 961.71             | 1916.13            | 2.549                          | 900.21             | 2294.38            |



| ProbeName      | Target position of probe on CpG island microarray | TargetID                | GeneSymbol    | CpG island Description | Ratio of relative methylation (TiO <sub>2</sub> -NP/Vehicle) | Sham group                     |                    |                    | TiO <sub>2</sub> -H group      |                    |                    |
|----------------|---------------------------------------------------|-------------------------|---------------|------------------------|--------------------------------------------------------------|--------------------------------|--------------------|--------------------|--------------------------------|--------------------|--------------------|
|                |                                                   |                         |               |                        |                                                              | Relative methylation (Cy5/Cy3) | Cy3 signal (Input) | Cy5 signal (MeDIP) | Relative methylation (Cy5/Cy3) | Cy3 signal (Input) | Cy5 signal (MeDIP) |
| A_68_P21722284 | chr2:146909810-146909854                          | NM_023504:1249          | Nkx2-4        | INSIDE                 | 1.279                                                        | 2.098                          | 482.85             | 1013.13            | 2.684                          | 544.87             | 1462.69            |
| A_68_P29102140 | chr13:65277261-65277305                           | NM_175290:29742         | Nlrp4f        | DOWNSTREAM             | 1.279                                                        | 1.633                          | 1127.59            | 1840.90            | 2.089                          | 956.29             | 1997.35            |
| A_68_P26132671 | chr8:107800458-107800502                          | NM_030152:134           | No13          | INSIDE                 | 1.279                                                        | 1.735                          | 4572.53            | 7931.53            | 2.219                          | 3493.10            | 7751.45            |
| A_68_P31621829 | chr18:36227658-36227702                           | NM_001167891:129134     | Nrg2          | INSIDE                 | 1.279                                                        | 2.408                          | 733.99             | 1767.10            | 3.080                          | 682.01             | 2100.29            |
| A_68_P25435752 | chr7:121559588-121559632                          | NM_011055:843           | Pde3b         | INSIDE                 | 1.279                                                        | 2.034                          | 1166.03            | 2372.10            | 2.603                          | 982.11             | 2556.09            |
| A_68_P28567641 | chr12:80190421-80190465                           | NM_029988:215           | Pigh          | INSIDE                 | 1.279                                                        | 2.103                          | 1444.07            | 3037.03            | 2.690                          | 1247.24            | 3354.70            |
| A_68_P21819741 | chr2:164611806-164611850                          | NM_133924:308           | Snx21         | INSIDE                 | 1.279                                                        | 1.655                          | 1182.12            | 1956.02            | 2.116                          | 1064.81            | 2252.62            |
| A_68_P24118278 | chr5:136344278-136344322                          | NM_021403:50325         | Srrm3         | INSIDE                 | 1.279                                                        | 1.738                          | 612.85             | 1065.06            | 2.222                          | 577.75             | 1283.79            |
| A_68_P26242943 | chr8:126545298-126545342                          | NM_133966:-111          | Taf5l         | DIVERGENT_PROMOTER     | 1.279                                                        | 3.384                          | 301.96             | 1021.92            | 4.329                          | 350.36             | 1516.76            |
| A_68_P25731030 | chr8:27269296-27269340                            | NM_199042:678           | Thap1         | INSIDE                 | 1.279                                                        | 2.005                          | 828.30             | 1660.65            | 2.565                          | 703.16             | 1803.58            |
| A_68_P20157012 | chr1:38053922-38053966                            | NM_172054:109           | Txndc9        | INSIDE                 | 1.279                                                        | 1.835                          | 1136.20            | 2085.46            | 2.348                          | 821.10             | 1928.13            |
| A_68_P32229414 | A_68_P32229414                                    |                         |               | Unknown                | 1.279                                                        | 3.806                          | 374.96             | 1427.10            | 4.866                          | 313.86             | 1527.33            |
| A_68_P20286841 | chr1:63492318-63492362                            | NM_001177600:-137       | Adam23        | PROMOTER               | 1.278                                                        | 1.498                          | 981.05             | 1469.51            | 1.914                          | 832.07             | 1592.27            |
| A_68_P32538581 | chrX:91612170-91612214                            | NM_026673:-256          | Apoo          | PROMOTER               | 1.278                                                        | 2.052                          | 1710.91            | 3511.27            | 2.623                          | 1026.75            | 2693.59            |
| A_68_P24760618 | chr6:113588447-113588492                          | NM_001113553:9          | Irak2         | INSIDE                 | 1.278                                                        | 3.132                          | 575.96             | 1803.75            | 4.004                          | 489.70             | 1960.68            |
| A_68_P27887969 | chr11:68026421-68026465                           | NM_008744:173886        | Ntn1          | INSIDE                 | 1.278                                                        | 2.377                          | 1998.37            | 4749.87            | 3.036                          | 1688.80            | 5128.00            |
| A_68_P29057341 | chr13:55937667-55937711                           | NM_011097:-4902         | Pitx1         | PROMOTER               | 1.278                                                        | 1.527                          | 1218.11            | 1859.65            | 1.950                          | 983.27             | 1917.82            |
| A_68_P23186784 | chr4:106512831-106512875                          | ENSMUST00000151369:7673 |               | DOWNSTREAM             | 1.278                                                        | 1.933                          | 747.01             | 1444.04            | 2.471                          | 683.53             | 1688.67            |
| A_68_P27179424 | chr10:60708537-60708583                           | NM_001081127:27626      | Adamts14      | INSIDE                 | 1.277                                                        | 1.533                          | 638.06             | 978.37             | 1.958                          | 533.27             | 1044.15            |
| A_68_P22376192 | chr3:101407957-101408001                          | NM_144900:602           | Atp1a1        | INSIDE                 | 1.277                                                        | 3.410                          | 530.25             | 1807.97            | 4.355                          | 480.96             | 2094.48            |
| A_68_P27914256 | chr11:72774869-72774913                           | NM_001163336:220        | Atp2a3        | INSIDE                 | 1.277                                                        | 1.817                          | 667.00             | 1212.17            | 2.321                          | 619.08             | 1436.67            |
| A_68_P27277812 | chr10:79074932-79074976                           | NM_198614:1809          | C2cd4c        | INSIDE                 | 1.277                                                        | 3.920                          | 742.15             | 2909.48            | 5.008                          | 576.14             | 2885.16            |
| A_68_P24990326 | chr7:19479287-19479331                            | NM_001033314:16445      | Ccdc61        | INSIDE                 | 1.277                                                        | 2.217                          | 1235.68            | 2739.02            | 2.831                          | 1104.20            | 3126.33            |
| A_68_P23335297 | chr4:136250002-136250046                          | NM_010142:141826        | Ephb2         | INSIDE                 | 1.277                                                        | 2.121                          | 2684.95            | 5694.87            | 2.709                          | 1659.38            | 4494.55            |
| A_68_P25420897 | chr7:118923563-118923607                          | NM_173739:-93           | Galnt14       | PROMOTER               | 1.277                                                        | 1.761                          | 1784.11            | 3141.35            | 2.249                          | 1590.16            | 3576.07            |
| A_68_P25661161 | chr8:12385043-12385087                            | NR_027975:-706          | Gm5607        | PROMOTER               | 1.277                                                        | 1.672                          | 686.75             | 1147.95            | 2.135                          | 621.96             | 1327.66            |
| A_68_P21345225 | chr2:75497497-75497541                            | NR_033513:172           | Gm6793        | INSIDE                 | 1.277                                                        | 2.445                          | 2267.42            | 5542.86            | 3.122                          | 1781.65            | 5562.96            |
| A_68_P26643352 | chr9:75161879-75161923                            | NM_138719:-148          | Gnb5          | PROMOTER               | 1.277                                                        | 2.194                          | 2021.28            | 4434.06            | 2.801                          | 1686.00            | 4723.04            |
| A_68_P21766453 | chr2:155418540-155418584                          | NM_008180:-120          | Gss           | PROMOTER               | 1.277                                                        | 2.929                          | 578.07             | 1693.32            | 3.741                          | 527.26             | 1972.23            |
| A_68_P31253724 | chr17:56218702-56218746                           | NM_008233:-355          | Hdgpfp2       | DIVERGENT_PROMOTER     | 1.277                                                        | 2.177                          | 8173.74            | 17795.56           | 2.781                          | 5076.44            | 14115.76           |
| A_68_P24448932 | chr6:52141182-52141226                            | NM_008265:498           | Hoxa4         | INSIDE                 | 1.277                                                        | 0.494                          | 1588.96            | 785.36             | 0.631                          | 1111.80            | 701.76             |
| A_68_P31930559 | chr19:5741845-5741889                             | NM_008520:963           | Ltbp3         | INSIDE                 | 1.277                                                        | 1.351                          | 1925.91            | 2601.87            | 1.725                          | 1473.22            | 2541.36            |
| A_68_P21079215 | chr2:26359143-26359187                            | NM_008714:178           | Notch1        | INSIDE                 | 1.277                                                        | 1.925                          | 1536.95            | 2959.02            | 2.458                          | 1356.11            | 3332.74            |
| A_68_P27285560 | chr10:80261376-80261420                           | NM_023900:-27           | Plekhl1       | DIVERGENT_PROMOTER     | 1.277                                                        | 1.521                          | 973.83             | 1481.23            | 1.942                          | 773.64             | 1502.13            |
| A_68_P25392588 | chr7:112630344-112630388                          | NM_028444:345           | Prkcdpb       | INSIDE                 | 1.277                                                        | 3.374                          | 1267.87            | 4278.02            | 4.308                          | 1103.49            | 4754.16            |
| A_68_P27915639 | chr11:72990519-72990563                           | NM_001168470:-30        | Tmem93        | PROMOTER               | 1.277                                                        | 2.941                          | 1205.65            | 3546.23            | 3.755                          | 942.90             | 3540.88            |
| A_68_P31155253 | chr17:34817071-34817115                           | NM_031176:9613          | Tnxb          | INSIDE                 | 1.277                                                        | 1.444                          | 1128.67            | 1629.62            | 1.843                          | 845.95             | 1559.44            |
| A_68_P28003257 | chr11:88861259-88861303                           | NM_009546:564           | Trim25        | INSIDE                 | 1.277                                                        | 1.678                          | 538.09             | 903.17             | 2.144                          | 407.52             | 873.71             |
| A_68_P26822035 | chr9:110020257-110020301                          | NM_133347:-2192         | Dhx30         | PROMOTER               | 1.276                                                        | 1.621                          | 2418.29            | 3919.46            | 2.067                          | 2016.41            | 4168.91            |
| A_68_P28221296 | chr12:8305454-8305498                             | NM_013527:3284          | Gdf7          | INSIDE                 | 1.276                                                        | 1.993                          | 1106.61            | 2204.97            | 2.542                          | 962.99             | 2447.49            |
| A_68_P25377912 | chr7:109398432-109398476                          | NM_019566:178           | Rhog          | INSIDE                 | 1.276                                                        | 2.636                          | 3077.52            | 8112.08            | 3.364                          | 2466.75            | 8297.91            |
| A_68_P28163661 | chr11:117061039-117061083                         | NM_001113486:86         | Septin9       | INSIDE                 | 1.276                                                        | 6.210                          | 1812.09            | 11252.51           | 7.923                          | 1642.23            | 13011.14           |
| A_68_P22749326 | chr4:15192772-15192816                            | NM_181401:-172          | Tmem64        | PROMOTER               | 1.276                                                        | 1.441                          | 953.90             | 1374.94            | 1.839                          | 883.54             | 1625.11            |
| A_68_P21935175 | chr3:9004387-9004431                              | NM_001025263:107        | Tpd52         | INSIDE                 | 1.276                                                        | 0.356                          | 1955.86            | 695.34             | 0.453                          | 1867.49            | 846.85             |
| A_68_P21844347 | chr2:168780711-168780761                          | NM_009564:351           | Zfp64         | INSIDE                 | 1.276                                                        | 2.304                          | 691.58             | 1593.36            | 2.941                          | 591.15             | 1738.44            |
| A_68_P28740684 | chr12:112088879-112088923                         | NM_001199785:412        | Zfp839        | INSIDE                 | 1.276                                                        | 2.023                          | 2566.38            | 5190.81            | 2.581                          | 2209.13            | 5701.65            |
| A_68_P28055487 | chr11:98156103-98156147                           | AK078235:9429           |               | DOWNSTREAM             | 1.276                                                        | 4.628                          | 1860.55            | 8610.39            | 5.906                          | 1531.71            | 9046.55            |
| A_68_P27678672 | chr11:30168407-30168451                           | ENSMUST00000149117:-253 |               | PROMOTER               | 1.276                                                        | 1.962                          | 1405.65            | 2757.34            | 2.502                          | 1156.17            | 2893.29            |
| A_68_P20091076 | chr1:24012273-24012317                            | NM_026503:185           | 1110058L19Rik | INSIDE                 | 1.275                                                        | 1.946                          | 1250.28            | 2433.50            | 2.482                          | 1100.40            | 2731.05            |
| A_68_P24055362 | chr5:123823322-123823372                          | NM_029850:28890         | Bcl7a         | INSIDE                 | 1.275                                                        | 1.672                          | 546.43             | 913.64             | 2.132                          | 402.49             | 858.18             |
| A_68_P23280756 | chr4:126234616-126234660                          | NM_175554:415           | Clspn         | INSIDE                 | 1.275                                                        | 2.118                          | 687.12             | 1455.62            | 2.701                          | 609.16             | 1645.56            |

| ProbeName      | Target position of probe on CpG island microarray | TargetID               | GeneSymbol    | CpG island Description | Ratio of relative methylation (TiO <sub>2</sub> -NP/Vehicle) | Sham group                     |                    |                    | TiO <sub>2</sub> -H group      |                    |                    |
|----------------|---------------------------------------------------|------------------------|---------------|------------------------|--------------------------------------------------------------|--------------------------------|--------------------|--------------------|--------------------------------|--------------------|--------------------|
|                |                                                   |                        |               |                        |                                                              | Relative methylation (Cy5/Cy3) | Cy3 signal (Input) | Cy5 signal (MeDIP) | Relative methylation (Cy5/Cy3) | Cy3 signal (Input) | Cy5 signal (MeDIP) |
| A_68_P31286852 | chr17:63231463-63231507                           | NM_010109:-818         | Efna5         | PROMOTER               | 1.275                                                        | 3.126                          | 2655.06            | 8298.63            | 3.985                          | 1978.46            | 7883.59            |
| A_68_P25151144 | chr7:64764458-64764502                            | NM_176942:899          | Gabra5        | INSIDE                 | 1.275                                                        | 5.761                          | 1529.41            | 8810.58            | 7.346                          | 1705.22            | 12526.27           |
| A_68_P30367929 | chr15:79521459-79521503                           | NM_013818:155          | Gtbp1         | INSIDE                 | 1.275                                                        | 2.134                          | 1075.58            | 2295.73            | 2.722                          | 858.32             | 2335.96            |
| A_68_P25088121 | chr7:51807262-51807306                            | NM_009473:2009         | Nrlh2         | INSIDE                 | 1.275                                                        | 2.156                          | 1687.94            | 3638.48            | 2.747                          | 1592.43            | 4375.05            |
| A_68_P32119644 | chr19:42276497-42276541                           | NM_018780:224          | Sfrp5         | INSIDE                 | 1.275                                                        | 1.789                          | 1631.72            | 2919.75            | 2.281                          | 1465.24            | 3341.72            |
| A_68_P31711733 | chr18:53336104-53336148                           | NM_026386:108          | Snx2          | INSIDE                 | 1.275                                                        | 3.207                          | 586.78             | 1881.92            | 4.088                          | 568.15             | 2322.77            |
| A_68_P25591624 | chr7:149088169-149088213                          | NM_023764:121          | Tollip        | INSIDE                 | 1.275                                                        | 1.824                          | 1094.03            | 1995.89            | 2.327                          | 953.64             | 2218.76            |
| A_68_P32144304 | chr19:46576472-46576516                           | NM_053100:357          | Trim8         | INSIDE                 | 1.275                                                        | 1.774                          | 741.47             | 1315.62            | 2.263                          | 685.70             | 1551.84            |
| A_68_P24951043 | chr7:4866972-4867016                              | NM_170759:176          | Zfp628        | INSIDE                 | 1.275                                                        | 2.191                          | 924.82             | 2025.98            | 2.794                          | 777.36             | 2172.04            |
| A_68_P28182346 | chr11:119959996-119960041                         | NM_183137:27           | 2410002101Rik | INSIDE                 | 1.274                                                        | 1.506                          | 2283.20            | 3438.72            | 1.919                          | 2093.70            | 4016.87            |
| A_68_P26372311 | chr9:26563473-26563520                            | NM_029792:4350         | B3gat1        | INSIDE                 | 1.274                                                        | 2.541                          | 1171.42            | 2976.49            | 3.236                          | 910.98             | 2947.90            |
| A_68_P25786792 | chr8:37677018-37677062                            | NM_015802:-43          | Dlc1          | PROMOTER               | 1.274                                                        | 1.478                          | 1983.20            | 2930.27            | 1.883                          | 1588.70            | 2991.59            |
| A_68_P23440963 | chr4:155222080-155222124                          | NM_010091:582          | Dvl1          | INSIDE                 | 1.274                                                        | 2.082                          | 688.33             | 1433.32            | 2.652                          | 610.03             | 1618.00            |
| A_68_P31149893 | chr17:33787074-33787118                           | NM_001109913:35307     | Hnrmpm        | INSIDE                 | 1.274                                                        | 1.836                          | 515.92             | 947.45             | 2.339                          | 472.76             | 1105.65            |
| A_68_P25098815 | chr7:53652229-53652273                            | NM_001112739:384       | Kenc1         | INSIDE                 | 1.274                                                        | 3.041                          | 1970.66            | 5993.53            | 3.876                          | 1848.39            | 7164.51            |
| A_68_P21579145 | chr2:120965882-120965926                          | NM_177846:530          | Lcm2          | INSIDE                 | 1.274                                                        | 2.513                          | 707.60             | 1778.05            | 3.201                          | 574.16             | 1837.65            |
| A_68_P30422819 | chr15:88890786-88890830                           | NM_001002005:653       | Panx2         | INSIDE                 | 1.274                                                        | 3.108                          | 1451.93            | 4512.32            | 3.959                          | 1241.37            | 4914.16            |
| A_68_P21817620 | chr2:164226294-164226338                          | NM_009036:-2377        | Rbpjl         | PROMOTER               | 1.274                                                        | 1.849                          | 367.57             | 679.62             | 2.355                          | 341.97             | 805.51             |
| A_68_P23542977 | chr5:24108129-24108173                            | NM_025891:-330         | Smardc3       | PROMOTER               | 1.274                                                        | 2.707                          | 4042.81            | 10944.81           | 3.450                          | 3136.32            | 10820.35           |
| A_68_P22900940 | chr4:48598477-48598521                            | NM_021436:434          | Tmeff1        | INSIDE                 | 1.274                                                        | 2.054                          | 1338.94            | 2750.62            | 2.616                          | 1164.37            | 3046.34            |
| A_68_P25005466 | chr7:25332334-25332378                            | NM_009532:188          | Xrcc1         | INSIDE                 | 1.274                                                        | 2.463                          | 793.15             | 1953.43            | 3.139                          | 724.62             | 2274.43            |
| A_68_P22312386 | chr3:88004797-88004841                            | ENSMUST00000167043:274 |               | INSIDE                 | 1.274                                                        | 2.504                          | 747.37             | 1871.15            | 3.191                          | 672.85             | 2146.76            |
| A_68_P28266975 | chr12:16818008-16818052                           | NM_033270:260          | E2f6          | INSIDE                 | 1.273                                                        | 1.452                          | 1602.98            | 2327.05            | 1.848                          | 1486.32            | 2746.33            |
| A_68_P31117097 | chr17:27692164-27692208                           | NM_001025427:-1332     | Hmga1         | PROMOTER               | 1.273                                                        | 5.592                          | 1103.28            | 6169.78            | 7.119                          | 944.66             | 6724.58            |
| A_68_P27887970 | chr11:68026508-68026552                           | NM_008744:173798       | Ntn1          | INSIDE                 | 1.273                                                        | 2.431                          | 1447.19            | 3518.00            | 3.096                          | 1086.58            | 3363.77            |
| A_68_P23562013 | chr5:28643983-28644027                            | NM_028234:276          | Rbm33         | INSIDE                 | 1.273                                                        | 2.286                          | 779.56             | 1781.76            | 2.909                          | 835.37             | 2430.40            |
| A_68_P21152637 | chr2:39045958-39046002                            | NM_178778:270          | Scal          | INSIDE                 | 1.273                                                        | 0.419                          | 1238.25            | 519.31             | 0.534                          | 1175.74            | 627.79             |
| A_68_P21152639 | chr2:39046148-39046192                            | NM_178778:80           | Scal          | INSIDE                 | 1.273                                                        | 3.457                          | 742.24             | 2566.00            | 4.400                          | 708.97             | 3119.26            |
| A_68_P25952924 | chr8:73125225-73125269                            | NM_133772:6967         | Ssbp4         | INSIDE                 | 1.273                                                        | 0.378                          | 1488.65            | 562.77             | 0.481                          | 1291.55            | 621.35             |
| A_68_P28048905 | chr11:97000299-97000343                           | NM_198100:10706        | Tbkbp1        | INSIDE                 | 1.273                                                        | 4.083                          | 981.94             | 4009.11            | 5.196                          | 879.99             | 4572.88            |
| A_68_P21931968 | chr3:8327438-8327482                              |                        |               | Unknown                | 1.273                                                        | 2.348                          | 1046.11            | 2456.28            | 2.990                          | 988.62             | 2956.06            |
| A_68_P25956908 | chr8:73985491-73985535                            | NM_022419:2044         | Abhd8         | INSIDE                 | 1.272                                                        | 1.783                          | 504.75             | 900.04             | 2.268                          | 422.81             | 959.03             |
| A_68_P25836149 | chr8:47556867-47556911                            | NM_007981:493          | Acs11         | INSIDE                 | 1.272                                                        | 2.200                          | 593.81             | 1306.17            | 2.797                          | 483.29             | 1351.89            |
| A_68_P29223875 | chr13:93196672-93196716                           | NM_175455:771          | Ankrd34b      | INSIDE                 | 1.272                                                        | 1.912                          | 447.72             | 856.00             | 2.432                          | 373.23             | 907.64             |
| A_68_P30927978 | chr16:85172880-85172924                           | NM_001198823:1050      | App           | INSIDE                 | 1.272                                                        | 3.762                          | 848.78             | 3193.13            | 4.786                          | 858.39             | 4108.41            |
| A_68_P22019078 | chr3:28680105-28680149                            | NM_177586:-106         | Eif5a2        | PROMOTER               | 1.272                                                        | 2.442                          | 3066.95            | 7490.76            | 3.106                          | 2584.70            | 8027.02            |
| A_68_P29626125 | chr14:57723587-57723631                           | NM_008125:-69          | Gjb2          | PROMOTER               | 1.272                                                        | 2.146                          | 1241.35            | 2664.05            | 2.729                          | 1111.81            | 3034.55            |
| A_68_P23607764 | chr5:36807549-36807593                            | NM_024478:-263         | Grpel1        | PROMOTER               | 1.272                                                        | 1.929                          | 2434.12            | 4694.94            | 2.454                          | 1976.42            | 4849.93            |
| A_68_P20007254 | chr1:4798162-4798206                              | NM_008866:211          | Lyp1a1        | INSIDE                 | 1.272                                                        | 2.741                          | 1174.82            | 3220.22            | 3.486                          | 1072.96            | 3740.63            |
| A_68_P26803474 | chr9:106356284-106356328                          | NM_021567:119          | Pebp4         | INSIDE                 | 1.272                                                        | 2.074                          | 11582.39           | 24019.00           | 2.637                          | 9463.05            | 24957.15           |
| A_68_P29753350 | chr14:80170582-80170626                           | NM_001042726:515       | Pcdh8         | INSIDE                 | 1.272                                                        | 1.360                          | 1774.95            | 2413.95            | 1.730                          | 1402.06            | 2425.54            |
| A_68_P25908469 | chr8:63703256-63703300                            | NM_021506:311          | Sh3rf1        | INSIDE                 | 1.272                                                        | 1.730                          | 1456.07            | 2518.56            | 2.200                          | 1204.66            | 2650.02            |
| A_68_P24033996 | chr5:120121006-120121050                          | NM_011535:351          | Tbx3          | INSIDE                 | 1.272                                                        | 1.906                          | 3551.74            | 6769.04            | 2.425                          | 2723.26            | 6602.77            |
| A_68_P30422255 | chr15:88785176-88785220                           | NM_172818:-350         | Till8         | PROMOTER               | 1.272                                                        | 3.622                          | 1178.37            | 4267.96            | 4.606                          | 1106.08            | 5094.90            |
| A_68_P27233861 | chr10:70622146-70622190                           | NM_031397:214          | Bicc1         | INSIDE                 | 1.271                                                        | 1.907                          | 1378.71            | 2629.18            | 2.423                          | 1169.88            | 2834.63            |
| A_68_P29024948 | chr13:49478604-49478648                           | NM_001039179:41709     | Bicd2         | INSIDE                 | 1.271                                                        | 3.600                          | 1323.63            | 4765.43            | 4.576                          | 1283.30            | 5871.97            |
| A_68_P28602202 | chr12:86452173-86452217                           | NM_030225:412          | Dlst          | INSIDE                 | 1.271                                                        | 1.478                          | 1024.73            | 1514.35            | 1.878                          | 872.19             | 1637.60            |
| A_68_P29629404 | chr14:58310425-58310469                           | NM_015771:54514        | Lats2         | INSIDE                 | 1.271                                                        | 3.933                          | 1913.49            | 7525.40            | 4.999                          | 1497.85            | 7487.69            |
| A_68_P29725075 | chr14:75346986-75347030                           | NM_001033439:676       | Lrch1         | INSIDE                 | 1.271                                                        | 1.478                          | 863.71             | 1276.21            | 1.878                          | 742.73             | 1394.90            |
| A_68_P28094412 | chr11:104987932-104987976                         | NM_172567:216          | Mettl2        | INSIDE                 | 1.271                                                        | 1.590                          | 1187.72            | 1887.89            | 2.020                          | 992.08             | 2003.96            |
| A_68_P22355466 | chr3:97462027-97462071                            | NM_182997:-86          | Prkab2        | PROMOTER               | 1.271                                                        | 2.594                          | 4064.98            | 10546.53           | 3.297                          | 3055.76            | 10074.23           |

| ProbeName      | Target position of probe on CpG island microarray | TargetID                | GeneSymbol    | CpG island Description | Ratio of relative methylation (TiO <sub>2</sub> -NP/Vehicle) | Sham group                     |                    |                    | TiO <sub>2</sub> -H group      |                    |                    |
|----------------|---------------------------------------------------|-------------------------|---------------|------------------------|--------------------------------------------------------------|--------------------------------|--------------------|--------------------|--------------------------------|--------------------|--------------------|
|                |                                                   |                         |               |                        |                                                              | Relative methylation (Cy5/Cy3) | Cy3 signal (Input) | Cy5 signal (MeDIP) | Relative methylation (Cy5/Cy3) | Cy3 signal (Input) | Cy5 signal (MeDIP) |
| A_68_P32760547 | chrX:152058267-152058311                          | NM_001093750:-418       | Ptchd1        | PROMOTER               | 1.271                                                        | 1.505                          | 989.25             | 1488.49            | 1.913                          | 642.40             | 1228.96            |
| A_68_P27561123 | chr11:4958083-4958127                             | NM_145216:-26           | Rasl10a       | PROMOTER               | 1.271                                                        | 1.984                          | 1298.10            | 2575.37            | 2.522                          | 1151.64            | 2904.93            |
| A_68_P31614991 | chr18:35000281-35000325                           | NM_001204914:60         | Reep2         | INSIDE                 | 1.271                                                        | 1.453                          | 1795.60            | 2609.75            | 1.847                          | 1457.77            | 2692.58            |
| A_68_P20454240 | chr1:95132647-95132691                            | NM_172463:195           | Sned1         | INSIDE                 | 1.271                                                        | 2.447                          | 339.04             | 829.74             | 3.110                          | 318.45             | 990.32             |
| A_68_P27985620 | chr11:85655489-85655533                           | NM_009324:9394          | Tbx2          | DOWNSTREAM             | 1.271                                                        | 2.896                          | 1775.93            | 5142.72            | 3.681                          | 1444.85            | 5319.02            |
| A_68_P21844244 | chr2:168760676-168760720                          | NM_009564:20389         | Zfp64         | INSIDE                 | 1.271                                                        | 2.525                          | 723.35             | 1826.43            | 3.208                          | 583.75             | 1872.76            |
| A_68_P31620712 | chr18:36047916-36047960                           |                         | Unknown       |                        | 1.271                                                        | 2.389                          | 1053.04            | 2515.23            | 3.036                          | 959.34             | 2912.72            |
| A_68_P22589085 | chr3:141832342-141832386                          | ENSMUST00000098568:-187 |               | PROMOTER               | 1.271                                                        | 2.817                          | 1442.63            | 4064.26            | 3.581                          | 1242.84            | 4450.79            |
| A_68_P23197627 | chr4:108453252-108453296                          | ENSMUST00000106658:-166 |               | PROMOTER               | 1.271                                                        | 1.677                          | 767.87             | 1287.99            | 2.132                          | 659.44             | 1405.91            |
| A_68_P24173496 | chr5:148211773-148211817                          | NM_010229:271           | Flt3          | INSIDE                 | 1.270                                                        | 2.280                          | 4486.84            | 10227.92           | 2.894                          | 3602.37            | 10427.02           |
| A_68_P28189606 | chr11:121121098-121121142                         | NM_001080932:-180       | Foxk2         | PROMOTER               | 1.270                                                        | 2.014                          | 2021.16            | 4070.78            | 2.558                          | 1773.00            | 4534.45            |
| A_68_P27835393 | chr11:59005136-59005180                           | NM_001159410:-3915      | Guk1          | PROMOTER               | 1.270                                                        | 1.522                          | 952.61             | 1449.87            | 1.932                          | 713.62             | 1378.96            |
| A_68_P27794866 | chr11:51419856-51419900                           | NM_001048061:505        | Hnrmpab       | INSIDE                 | 1.270                                                        | 1.689                          | 1422.05            | 2401.77            | 2.145                          | 1184.57            | 2541.17            |
| A_68_P28553815 | chr12:77504735-77504779                           | NM_001002012:-406       | Hspa2         | PROMOTER               | 1.270                                                        | 3.540                          | 2968.33            | 10509.26           | 4.495                          | 2407.85            | 10823.02           |
| A_68_P27270906 | chr10:77365060-77365104                           | NM_145152:199           | Lrrc3         | INSIDE                 | 1.270                                                        | 4.664                          | 3437.41            | 16030.98           | 5.922                          | 2588.99            | 15331.64           |
| A_68_P27282875 | chr10:79849919-79849963                           | NM_198615:456           | Mex3d         | INSIDE                 | 1.270                                                        | 2.059                          | 1297.17            | 2670.87            | 2.614                          | 1178.37            | 3080.78            |
| A_68_P28685553 | chr12:102266820-102266864                         | NR_035421:-6839         | Mir1190       | PROMOTER               | 1.270                                                        | 2.218                          | 751.85             | 1667.62            | 2.817                          | 742.38             | 2091.19            |
| A_68_P22979365 | chr4:64785845-64785889                            | NM_021362:659           | Pappa         | INSIDE                 | 1.270                                                        | 1.831                          | 663.79             | 1215.23            | 2.326                          | 650.64             | 1513.29            |
| A_68_P21974614 | chr3:19210634-19210678                            | NM_001122759:666        | Pde7a         | INSIDE                 | 1.270                                                        | 2.196                          | 345.63             | 758.96             | 2.789                          | 258.80             | 721.70             |
| A_68_P31157969 | chr17:35293395-35293439                           | NM_001199044:8406       | Prrc2a        | INSIDE                 | 1.270                                                        | 4.188                          | 4961.32            | 20775.58           | 5.316                          | 3725.98            | 19808.80           |
| A_68_P23239476 | chr4:117963343-117963387                          | NM_011213:638           | Ptprf         | INSIDE                 | 1.270                                                        | 2.880                          | 1084.57            | 3123.66            | 3.657                          | 906.10             | 3313.35            |
| A_68_P26849149 | chr9:115219514-115219558                          | NM_024222:3             | St3b          | INSIDE                 | 1.270                                                        | 1.386                          | 2025.97            | 2807.06            | 1.760                          | 1742.87            | 3067.12            |
| A_68_P20016444 | chr1:7387937-7387981                              | ENSMUST00000138711:-76  |               | PROMOTER               | 1.270                                                        | 1.486                          | 1236.59            | 1837.32            | 1.887                          | 1158.30            | 2186.06            |
| A_68_P28183962 | chr11:120210037-120210081                         | NR_038126:67            | 0610009L18Rik | INSIDE                 | 1.269                                                        | 4.261                          | 999.69             | 4259.56            | 5.407                          | 821.64             | 4442.33            |
| A_68_P27277827 | chr10:79076635-79076679                           | NM_198614:107           | C2cd4c        | INSIDE                 | 1.269                                                        | 2.229                          | 611.48             | 1362.80            | 2.828                          | 548.22             | 1550.58            |
| A_68_P25272103 | chr7:88598756-88598800                            | NM_007755:784           | Cpeb1         | INSIDE                 | 1.269                                                        | 1.513                          | 1220.78            | 1847.29            | 1.920                          | 1039.03            | 1995.01            |
| A_68_P21769577 | chr2:155937298-155937342                          | NM_170588:381           | Cpne1         | INSIDE                 | 1.269                                                        | 2.786                          | 2692.57            | 7501.88            | 3.535                          | 2306.68            | 8154.75            |
| A_68_P26519504 | chr9:53055815-53055859                            | NM_029936:381           | Ddx10         | INSIDE                 | 1.269                                                        | 3.135                          | 13279.07           | 41625.28           | 3.977                          | 8825.63            | 35102.54           |
| A_68_P23471513 | chr5:9161567-9161611                              | NM_001110327:188        | Dmtf1         | INSIDE                 | 1.269                                                        | 3.639                          | 1547.19            | 5630.00            | 4.617                          | 1269.72            | 5862.76            |
| A_68_P26078518 | chr8:97125424-97125468                            | NM_028221:180           | Fam192a       | INSIDE                 | 1.269                                                        | 2.561                          | 750.10             | 1921.00            | 3.249                          | 704.38             | 2288.27            |
| A_68_P28185093 | chr11:120392227-120392271                         | NM_008101:208           | Gegr          | INSIDE                 | 1.269                                                        | 1.337                          | 3494.02            | 4670.89            | 1.696                          | 2710.09            | 4596.83            |
| A_68_P20620518 | chr1:134195183-134195227                          | NM_144810:2             | Klhdc8a       | INSIDE                 | 1.269                                                        | 3.367                          | 1419.95            | 4780.62            | 4.274                          | 1181.68            | 5050.25            |
| A_68_P22613734 | chr3:145947914-145947958                          | NM_022983:64012         | Lpar3         | INSIDE                 | 1.269                                                        | 3.037                          | 1777.67            | 5398.58            | 3.852                          | 1454.46            | 5603.19            |
| A_68_P26983889 | chr10:19653542-19653586                           | NM_008580:-767          | Map3k5        | PROMOTER               | 1.269                                                        | 2.221                          | 637.44             | 1416.06            | 2.820                          | 632.97             | 1785.07            |
| A_68_P27950596 | chr11:79524897-79524941                           | NR_029579:-552          | Mir193        | PROMOTER               | 1.269                                                        | 1.625                          | 1890.18            | 3071.22            | 2.062                          | 1514.87            | 3123.60            |
| A_68_P31920646 | chr19:4012495-4012539                             | NM_133666:209           | Ndufv1        | INSIDE                 | 1.269                                                        | 1.636                          | 2741.53            | 4484.80            | 2.076                          | 2151.81            | 4468.15            |
| A_68_P26742494 | chr9:95459899-95459943                            | NM_198414:-315          | Paqr9         | PROMOTER               | 1.269                                                        | 1.829                          | 1103.08            | 2017.09            | 2.320                          | 951.41             | 2207.32            |
| A_68_P22356139 | chr3:97555701-97555745                            | NM_178080:16215         | Pde4dip       | INSIDE                 | 1.269                                                        | 2.018                          | 798.15             | 1611.02            | 2.561                          | 655.97             | 1679.97            |
| A_68_P21417955 | chr2:90420030-90420074                            | NM_008982:752           | Ptprj         | INSIDE                 | 1.269                                                        | 2.361                          | 639.79             | 1510.67            | 2.996                          | 596.15             | 1786.06            |
| A_68_P27561122 | chr11:4958001-4958045                             | NM_145216:-108          | Rasl10a       | PROMOTER               | 1.269                                                        | 2.261                          | 973.81             | 2201.50            | 2.868                          | 916.47             | 2628.20            |
| A_68_P24428221 | chr6:48547445-48547489                            | NM_001079901:3585       | Repin1        | INSIDE                 | 1.269                                                        | 3.192                          | 617.70             | 1971.72            | 4.051                          | 520.03             | 2106.43            |
| A_68_P30345854 | chr15:75900190-75900234                           | NM_134089:-52           | Scrib         | PROMOTER               | 1.269                                                        | 1.957                          | 1230.03            | 2407.28            | 2.483                          | 1055.42            | 2620.94            |
| A_68_P22543381 | chr3:133207644-133207688                          | NM_001040400:-312       | Tet2          | PROMOTER               | 1.269                                                        | 1.723                          | 1710.93            | 2948.59            | 2.188                          | 1361.83            | 2979.10            |
| A_68_P22880595 | chr4:45024781-45024825                            | NM_001163283:482        | Zbtb5         | INSIDE                 | 1.269                                                        | 1.704                          | 1217.37            | 2074.40            | 2.162                          | 979.76             | 2118.20            |
| A_68_P24994120 | chr7:20162964-20163008                            | NM_022409:351           | Zfp296        | INSIDE                 | 1.269                                                        | 1.584                          | 2185.62            | 3462.32            | 2.010                          | 1990.34            | 4001.45            |
| A_68_P29428130 | A_68_P29428130                                    |                         | Unknown       |                        | 1.269                                                        | 1.979                          | 352.01             | 696.65             | 2.511                          | 296.85             | 745.48             |
| A_68_P26399344 | chr9:31019625-31019669                            | NM_001102455:-246       | Alpl2         | PROMOTER               | 1.268                                                        | 1.899                          | 2760.89            | 5242.40            | 2.408                          | 2143.04            | 5160.90            |
| A_68_P30281411 | chr15:64213769-64213813                           | NM_010026:691           | Asap1         | INSIDE                 | 1.268                                                        | 1.697                          | 805.58             | 1367.11            | 2.153                          | 777.04             | 1672.65            |
| A_68_P29024656 | chr13:49437040-49437084                           | NM_001039179:145        | Bicd2         | INSIDE                 | 1.268                                                        | 2.566                          | 703.80             | 1805.79            | 3.253                          | 680.14             | 2212.68            |
| A_68_P30387018 | chr15:83002306-83002350                           | NM_029787:310           | Cyb5r3        | INSIDE                 | 1.268                                                        | 0.425                          | 1347.31            | 572.85             | 0.539                          | 1026.25            | 553.23             |
| A_68_P26657027 | chr9:77765735-77765781                            | NM_134255:587           | Elovl5        | INSIDE                 | 1.268                                                        | 2.553                          | 1597.62            | 4078.80            | 3.238                          | 1347.09            | 4361.69            |

| ProbeName      | Target position of probe on CpG island microarray | TargetID              | GeneSymbol    | CpG island Description | Ratio of relative methylation (TiO <sub>2</sub> -NP/Vehicle) | Sham group                     |                    |                    | TiO <sub>2</sub> -H group      |                    |                    |
|----------------|---------------------------------------------------|-----------------------|---------------|------------------------|--------------------------------------------------------------|--------------------------------|--------------------|--------------------|--------------------------------|--------------------|--------------------|
|                |                                                   |                       |               |                        |                                                              | Relative methylation (Cy5/Cy3) | Cy3 signal (Input) | Cy5 signal (MeDIP) | Relative methylation (Cy5/Cy3) | Cy3 signal (Input) | Cy5 signal (MeDIP) |
| A_68_P31936715 | chr19:7000722-7000766                             | NM_008431:8261        | Kenk4         | INSIDE                 | 1.268                                                        | 2.956                          | 1414.46            | 4181.71            | 3.750                          | 1184.89            | 4443.10            |
| A_68_P21101982 | chr2:30093777-30093821                            | NM_177725:510         | Lrrc8a        | INSIDE                 | 1.268                                                        | 5.433                          | 963.19             | 5233.38            | 6.890                          | 678.57             | 4675.64            |
| A_68_P23588238 | chr5:33678734-33678778                            | NM_021500:536         | Maea          | INSIDE                 | 1.268                                                        | 5.193                          | 3154.45            | 16380.76           | 6.583                          | 2359.14            | 15529.62           |
| A_68_P26192683 | chr8:118231489-118231533                          | NM_001025577:-716     | Maf           | PROMOTER               | 1.268                                                        | 2.220                          | 571.30             | 1268.01            | 2.814                          | 440.98             | 1240.84            |
| A_68_P27282831 | chr10:79844492-79844536                           | NM_198615:5882        | Mex3d         | INSIDE                 | 1.268                                                        | 5.592                          | 1593.44            | 8909.80            | 7.089                          | 1426.84            | 10114.79           |
| A_68_P22157981 | chr3:55987567-55987611                            | NM_030595:35          | Nbea          | INSIDE                 | 1.268                                                        | 2.882                          | 1223.84            | 3527.41            | 3.656                          | 1140.24            | 4168.63            |
| A_68_P25907378 | chr8:63472076-63472120                            | NM_175089:82          | Nek1          | INSIDE                 | 1.268                                                        | 1.575                          | 1075.07            | 1693.16            | 1.997                          | 916.59             | 1830.27            |
| A_68_P24622498 | chr6:88450154-88450198                            | NM_019685:34760       | Ruvbl1        | DOWNSTREAM             | 1.268                                                        | 2.081                          | 3307.01            | 6881.21            | 2.639                          | 2688.97            | 7097.30            |
| A_68_P29578872 | chr14:47502657-47502701                           | NM_001037221:39       | Samd4         | INSIDE                 | 1.268                                                        | 2.140                          | 1800.17            | 3852.57            | 2.713                          | 1570.51            | 4260.65            |
| A_68_P20186988 | chr1:43155340-43155384                            | NM_001013025:105      | Tgfbrap1      | INSIDE                 | 1.268                                                        | 0.464                          | 1396.70            | 648.07             | 0.588                          | 1206.06            | 709.74             |
| A_68_P20858940 | chr1:179252857-179252901                          |                       |               | Unknown                | 1.268                                                        | 1.746                          | 1430.23            | 2496.48            | 2.213                          | 1191.07            | 2636.16            |
| A_68_P33007024 | A_68_P33007024                                    |                       |               | Unknown                | 1.268                                                        | 1.410                          | 1148.79            | 1619.74            | 1.788                          | 1035.37            | 1851.03            |
| A_68_P21761082 | chr2:154375340-154375384                          | NM_029305:723         | 1700003F12Rik | INSIDE                 | 1.267                                                        | 1.734                          | 955.07             | 1656.27            | 2.197                          | 932.50             | 2048.66            |
| A_68_P26875484 | chr9:119892493-119892537                          | NM_153287:1262        | Camp1         | INSIDE                 | 1.267                                                        | 1.523                          | 716.56             | 1091.23            | 1.930                          | 627.60             | 1211.26            |
| A_68_P23342687 | chr4:137469337-137469381                          | NM_199307:51207       | Eec1          | INSIDE                 | 1.267                                                        | 2.099                          | 1339.47            | 2811.71            | 2.661                          | 1226.65            | 3263.52            |
| A_68_P21082674 | chr2:26997916-26997960                            | NM_175427:59          | Fam163b       | INSIDE                 | 1.267                                                        | 1.972                          | 961.42             | 1896.33            | 2.499                          | 847.61             | 2117.81            |
| A_68_P26612670 | chr9:69607179-69607223                            | NM_022378:1547        | Foxb1         | INSIDE                 | 1.267                                                        | 1.394                          | 7936.58            | 11062.42           | 1.766                          | 5595.76            | 9882.10            |
| A_68_P21666842 | chr2:136941472-136941517                          | NM_013822:762         | Jag1          | INSIDE                 | 1.267                                                        | 2.336                          | 447.11             | 1044.55            | 2.960                          | 367.67             | 1088.24            |
| A_68_P30148792 | chr15:38229751-38229795                           | NM_013692:690         | Klf10         | INSIDE                 | 1.267                                                        | 1.480                          | 1079.76            | 1598.51            | 1.875                          | 980.08             | 1838.08            |
| A_68_P27280137 | chr10:79441295-79441339                           | NM_001003949:5759     | ORF61         | INSIDE                 | 1.267                                                        | 3.834                          | 1323.71            | 5074.57            | 4.858                          | 905.73             | 4400.18            |
| A_68_P27265101 | chr10:76424431-76424475                           | NM_021568:240         | Pebp3         | INSIDE                 | 1.267                                                        | 2.148                          | 4139.02            | 8890.74            | 2.722                          | 3423.32            | 9318.77            |
| A_68_P25021471 | chr7:29157648-29157692                            | NM_001083912:11       | Plekhg2       | INSIDE                 | 1.267                                                        | 1.721                          | 1857.97            | 3197.03            | 2.181                          | 1456.21            | 3175.64            |
| A_68_P21749123 | chr2:152223588-152223632                          | NM_011438:172         | Sox12         | INSIDE                 | 1.267                                                        | 2.628                          | 1477.83            | 3883.92            | 3.330                          | 1284.04            | 4276.02            |
| A_68_P30360706 | chr15:78370035-78370079                           | NM_009218:4719        | Sstr3         | INSIDE                 | 1.267                                                        | 2.933                          | 1372.50            | 4025.76            | 3.716                          | 1157.76            | 4301.75            |
| A_68_P22872456 | chr4:43575371-43575415                            | NM_011602:63          | Tln1          | INSIDE                 | 1.267                                                        | 2.282                          | 515.18             | 1175.45            | 2.892                          | 460.83             | 1332.58            |
| A_68_P21736746 | chr2:149656361-149656405                          | NM_001085521:-136     | Tmem90b       | PROMOTER               | 1.267                                                        | 1.749                          | 1054.05            | 1843.43            | 2.215                          | 949.44             | 2103.40            |
| A_68_P23142414 | chr4:98787172-98787216                            | NM_026082:412         | Dock7         | INSIDE                 | 1.266                                                        | 3.323                          | 691.92             | 2299.50            | 4.209                          | 656.21             | 2761.69            |
| A_68_P23927390 | chr5:100468503-100468547                          | NM_016690:-283        | Hnrpd1        | DIVERGENT_PROMOTER     | 1.266                                                        | 2.734                          | 716.05             | 1957.66            | 3.461                          | 636.08             | 2201.42            |
| A_68_P24449232 | chr6:52176211-52176255                            | NM_010456:1137        | Hoxa9         | INSIDE                 | 1.266                                                        | 1.887                          | 3973.77            | 7499.53            | 2.389                          | 3242.61            | 7745.08            |
| A_68_P27736855 | chr11:40508399-40508443                           | NM_134017:-2236       | Mat2b         | PROMOTER               | 1.266                                                        | 1.468                          | 1336.94            | 1962.56            | 1.858                          | 1213.79            | 2255.58            |
| A_68_P27927427 | chr11:75469683-75469727                           | NM_001080775:188      | Myo1c         | INSIDE                 | 1.266                                                        | 1.573                          | 3991.67            | 6280.72            | 1.993                          | 3457.48            | 6889.40            |
| A_68_P20826591 | chr1:173126357-173126401                          | NM_025557:21          | Pep4l1        | INSIDE                 | 1.266                                                        | 1.411                          | 1160.84            | 1637.64            | 1.786                          | 823.83             | 1471.40            |
| A_68_P20349748 | chr1:74708251-74708295                            | NM_001014974:-55      | Tu14          | PROMOTER               | 1.266                                                        | 3.167                          | 1384.94            | 4386.46            | 4.009                          | 1261.58            | 5057.39            |
| A_68_P26082711 | chr8:97855540-97855584                            | NM_024467:288         | Zfp319        | INSIDE                 | 1.266                                                        | 5.334                          | 2129.77            | 11361.27           | 6.755                          | 1804.34            | 12188.41           |
| A_68_P23962135 | chr5:107003692-107003736                          | ENSMUST00000131029:20 |               | INSIDE                 | 1.266                                                        | 1.719                          | 1033.99            | 1777.88            | 2.176                          | 1008.44            | 2194.77            |
| A_68_P28853129 | chr13:17786533-17786577                           | NM_138654:45          | 5033411D12Rik | INSIDE                 | 1.265                                                        | 2.260                          | 9494.46            | 21455.77           | 2.859                          | 6549.70            | 18722.36           |
| A_68_P31922426 | chr19:4305690-4305734                             | NM_130863:243         | Adrbk1        | INSIDE                 | 1.265                                                        | 1.678                          | 1263.71            | 2120.16            | 2.123                          | 1031.50            | 2189.55            |
| A_68_P32139022 | chr19:45616075-45616119                           | NM_001037758:177873   | Btrc          | DOWNSTREAM             | 1.265                                                        | 2.660                          | 605.24             | 1610.07            | 3.365                          | 591.84             | 1991.53            |
| A_68_P24268748 | chr6:17586921-17586965                            | NM_007604:-155        | Capza2        | PROMOTER               | 1.265                                                        | 2.250                          | 679.09             | 1528.11            | 2.847                          | 631.15             | 1796.93            |
| A_68_P23397277 | chr4:148274728-148274772                          | NM_027195:96250       | Cas2l         | INSIDE                 | 1.265                                                        | 2.670                          | 383.70             | 1024.65            | 3.378                          | 360.02             | 1216.06            |
| A_68_P23816915 | chr5:77017837-77017881                            | NM_199032:-2880       | Cep135        | PROMOTER               | 1.265                                                        | 2.332                          | 329.41             | 768.29             | 2.950                          | 295.18             | 870.79             |
| A_68_P27677360 | chr11:29924702-29924746                           | NM_146016:1309        | Eml6          | INSIDE                 | 1.265                                                        | 1.718                          | 5628.08            | 9670.61            | 2.174                          | 4630.52            | 10066.99           |
| A_68_P24795429 | chr6:119797862-119797906                          | NM_053204:284         | Erc1          | INSIDE                 | 1.265                                                        | 2.768                          | 1251.71            | 3464.60            | 3.502                          | 970.19             | 3397.77            |
| A_68_P30395523 | chr15:84387987-84388031                           | NM_177630:245         | Ldoc11        | INSIDE                 | 1.265                                                        | 2.954                          | 1386.49            | 4096.20            | 3.736                          | 1180.54            | 4410.72            |
| A_68_P31074430 | chr17:17762134-17762178                           | NM_172827:-703        | Lnpep         | PROMOTER               | 1.265                                                        | 1.373                          | 4221.16            | 5796.44            | 1.737                          | 3037.01            | 5273.79            |
| A_68_P23296216 | chr4:129012377-129012421                          | NM_009030:216         | Rbbp4         | INSIDE                 | 1.265                                                        | 1.605                          | 1135.94            | 1822.82            | 2.030                          | 956.85             | 1942.05            |
| A_68_P31867990 | chr18:81169207-81169251                           | NM_178280:14089       | Sall3         | INSIDE                 | 1.265                                                        | 1.995                          | 1760.77            | 3512.89            | 2.524                          | 1482.05            | 3741.43            |
| A_68_P31514145 | chr18:14942138-14942182                           | NM_001100449:407      | Taf4b         | INSIDE                 | 1.265                                                        | 3.463                          | 284.18             | 984.01             | 4.379                          | 284.97             | 1247.81            |
| A_68_P26289279 | chr9:7764076-7764120                              | NM_133739:22          | Tmem123       | INSIDE                 | 1.265                                                        | 2.132                          | 1412.54            | 3011.59            | 2.696                          | 1121.23            | 3023.12            |
| A_68_P23925842 | chr5:100157797-100157841                          | NR_030692:261         | A930011G23Rik | INSIDE                 | 1.264                                                        | 1.487                          | 1034.17            | 1537.35            | 1.879                          | 880.36             | 1654.13            |
| A_68_P32321495 | chrX:34588913-34588957                            | NM_173779:95          | Ankrd58       | INSIDE                 | 1.264                                                        | 2.109                          | 973.77             | 2053.51            | 2.666                          | 542.37             | 1446.06            |

| ProbeName      | Target position of probe on CpG island microarray | TargetID                | GeneSymbol    | CpG island Description | Ratio of relative methylation (TiO <sub>2</sub> -NP/Vehicle) | Sham group                     |                    |                    | TiO <sub>2</sub> -H group      |                    |                    |
|----------------|---------------------------------------------------|-------------------------|---------------|------------------------|--------------------------------------------------------------|--------------------------------|--------------------|--------------------|--------------------------------|--------------------|--------------------|
|                |                                                   |                         |               |                        |                                                              | Relative methylation (Cy5/Cy3) | Cy3 signal (Input) | Cy5 signal (MeDIP) | Relative methylation (Cy5/Cy3) | Cy3 signal (Input) | Cy5 signal (MeDIP) |
| A_68_P28450023 | chr12:56086848-56086892                           | NM_013815:453           | Baz1a         | INSIDE                 | 1.264                                                        | 1.791                          | 538.07             | 963.65             | 2.264                          | 489.48             | 1108.22            |
| A_68_P27894659 | chr11:69182111-69182155                           | NM_146019:796           | Chd3          | INSIDE                 | 1.264                                                        | 3.629                          | 2077.29            | 7538.73            | 4.588                          | 1704.63            | 7821.61            |
| A_68_P26790788 | chr9:104165092-104165136                          | NM_001163026:146        | Dnajc13       | INSIDE                 | 1.264                                                        | 4.115                          | 2086.32            | 8584.19            | 5.201                          | 1759.67            | 9152.19            |
| A_68_P22019966 | chr3:28981333-28981377                            | NM_001167748:-144       | Egfm1         | PROMOTER               | 1.264                                                        | 2.046                          | 1100.84            | 2252.74            | 2.587                          | 967.63             | 2503.29            |
| A_68_P32152778 | chr19:47993679-47993723                           | NM_001001738:89         | Itrip1        | INSIDE                 | 1.264                                                        | 2.934                          | 633.02             | 1857.57            | 3.710                          | 600.31             | 2227.22            |
| A_68_P23120705 | chr4:94717778-94717822                            | NM_010591:1113          | Jun           | INSIDE                 | 1.264                                                        | 2.591                          | 1013.71            | 2626.92            | 3.277                          | 901.41             | 2953.53            |
| A_68_P29919366 | chr14:115439544-115439588                         | NR_029785:-3326         | Mir17         | PROMOTER               | 1.264                                                        | 3.877                          | 1087.55            | 4216.78            | 4.902                          | 939.26             | 4604.15            |
| A_68_P25326014 | chr7:99817883-99817941                            | NM_029078:510           | Pcf11         | INSIDE                 | 1.264                                                        | 2.284                          | 1208.56            | 2760.68            | 2.886                          | 956.98             | 2762.14            |
| A_68_P31757541 | chr18:61560019-61560063                           | NM_133249:45            | Ppargc1b      | INSIDE                 | 1.264                                                        | 2.927                          | 236.47             | 692.04             | 3.698                          | 227.81             | 842.44             |
| A_68_P29507005 | chr14:31438638-31438682                           | NM_011103:734           | Prkd2         | INSIDE                 | 1.264                                                        | 1.959                          | 5453.51            | 10681.56           | 2.475                          | 4311.23            | 10671.68           |
| A_68_P28469855 | chr12:60112957-60113001                           | NM_009147:26            | Sec23a        | INSIDE                 | 1.264                                                        | 2.914                          | 818.11             | 2383.93            | 3.684                          | 663.56             | 2444.38            |
| A_68_P29011270 | chr13:47138723-47138767                           | NM_016785:-158          | Tpmt          | DIVERGENT_PROMOTER     | 1.264                                                        | 2.767                          | 5004.81            | 13849.25           | 3.497                          | 4026.38            | 14078.91           |
| A_68_P21810978 | chr2:163029877-163029921                          | ENSMUST00000128999:-390 |               | PROMOTER               | 1.264                                                        | 5.091                          | 1077.20            | 5484.12            | 6.437                          | 776.55             | 4998.35            |
| A_68_P32050812 | chr19:29122539-29122583                           | NM_021299:-168          | Ak3           | PROMOTER               | 1.263                                                        | 1.600                          | 3464.40            | 5543.36            | 2.022                          | 2916.88            | 5896.82            |
| A_68_P28741416 | chr12:112215114-112215158                         | NM_175207:2095          | Ankrd9        | INSIDE                 | 1.263                                                        | 2.489                          | 612.82             | 1525.21            | 3.143                          | 561.83             | 1765.86            |
| A_68_P20293018 | chr1:64580121-64580165                            | NM_001037726:765        | Creb1         | INSIDE                 | 1.263                                                        | 1.928                          | 1218.33            | 2348.67            | 2.434                          | 1055.81            | 2569.78            |
| A_68_P26317495 | chr9:14305304-14305348                            | NM_023153:264           | Cwe15         | INSIDE                 | 1.263                                                        | 1.505                          | 1330.45            | 2001.97            | 1.900                          | 1182.32            | 2246.40            |
| A_68_P27261499 | chr10:75807838-75807882                           | NM_001081419:147        | Dip2a         | INSIDE                 | 1.263                                                        | 1.999                          | 2994.62            | 5987.38            | 2.526                          | 2628.85            | 6640.99            |
| A_68_P27594246 | chr11:11926108-11926153                           | NM_001177629:1844       | Grb10         | INSIDE                 | 1.263                                                        | 2.147                          | 1896.69            | 4072.91            | 2.712                          | 1657.21            | 4494.92            |
| A_68_P25022017 | chr7:29244098-29244142                            | NM_001141921:6864       | Lrfr1         | INSIDE                 | 1.263                                                        | 1.701                          | 829.38             | 1411.03            | 2.148                          | 639.56             | 1374.03            |
| A_68_P31950794 | chr19:10532257-10532301                           | NM_001111140:-341       | Lrre10b       | PROMOTER               | 1.263                                                        | 1.696                          | 1186.35            | 2012.17            | 2.142                          | 876.55             | 1877.28            |
| A_68_P25187997 | chr7:73532946-73532990                            | NM_146191:259           | Lrrk1         | INSIDE                 | 1.263                                                        | 2.602                          | 2788.34            | 7254.89            | 3.285                          | 2433.96            | 7995.91            |
| A_68_P27449323 | chr10:110943535-110943582                         | NM_009344:217           | Phlda1        | INSIDE                 | 1.263                                                        | 2.017                          | 1281.53            | 2584.63            | 2.548                          | 1117.18            | 2846.18            |
| A_68_P28103447 | chr11:106640770-106640814                         | NR_027785:37            | Polg2         | INSIDE                 | 1.263                                                        | 2.456                          | 1057.25            | 2596.40            | 3.102                          | 921.00             | 2857.29            |
| A_68_P23916645 | chr5:98615219-98615263                            | NM_029947:5353          | Prdm8         | INSIDE                 | 1.263                                                        | 1.519                          | 736.27             | 1118.67            | 1.919                          | 637.06             | 1222.39            |
| A_68_P27304471 | chr10:84217878-84217922                           | NM_001024918:-892       | Rfx4          | PROMOTER               | 1.263                                                        | 2.027                          | 838.68             | 1699.82            | 2.559                          | 691.37             | 1769.49            |
| A_68_P26142248 | chr8:109459632-109459676                          | NM_009229:5             | Sntb2         | INSIDE                 | 1.263                                                        | 0.525                          | 1169.96            | 614.08             | 0.663                          | 1153.47            | 764.78             |
| A_68_P21864915 | chr2:172375828-172375872                          | NM_001159696:-640       | Tefap2c       | PROMOTER               | 1.263                                                        | 2.210                          | 2070.51            | 4576.30            | 2.792                          | 1806.04            | 5042.01            |
| A_68_P28078894 | chr11:102178324-102178368                         | NM_001044383:255        | Ubf1          | INSIDE                 | 1.263                                                        | 1.610                          | 3048.58            | 4909.13            | 2.033                          | 2742.77            | 5576.66            |
| A_68_P26038357 | chr8:90483082-90483126                            | NM_033327:390           | Zfp423        | INSIDE                 | 1.263                                                        | 2.604                          | 584.93             | 1523.07            | 3.288                          | 606.53             | 1994.16            |
| A_68_P25258439 | chr7:86135415-86135459                            |                         | Unknown       |                        | 1.263                                                        | 3.364                          | 857.39             | 2883.87            | 4.248                          | 692.29             | 2941.17            |
| A_68_P24850989 | chr6:131383710-131383754                          |                         | Unknown       |                        | 1.263                                                        | 1.623                          | 523.16             | 849.24             | 2.051                          | 602.17             | 1234.91            |
| A_68_P24476445 | chr6:56664725-56664769                            | NM_030235:-152          | Avl9          | PROMOTER               | 1.262                                                        | 2.483                          | 2433.00            | 6041.70            | 3.135                          | 1876.78            | 5883.33            |
| A_68_P25496228 | chr7:132851532-132851576                          | NM_001081022:165        | D430042O09Rik | INSIDE                 | 1.262                                                        | 1.711                          | 1108.89            | 1897.42            | 2.159                          | 972.86             | 2100.00            |
| A_68_P28697529 | chr12:104664017-104664061                         | NM_001159502:-48        | Ddx24         | PROMOTER               | 1.262                                                        | 2.138                          | 851.37             | 1819.85            | 2.697                          | 805.34             | 2172.32            |
| A_68_P28610310 | chr12:87811236-87811280                           | NM_011934:48665         | Esrrb         | INSIDE                 | 1.262                                                        | 2.462                          | 958.00             | 2358.63            | 3.108                          | 774.94             | 2408.60            |
| A_68_P23333957 | chr4:135998981-135999032                          | NM_008309:19568         | Htr1d         | INSIDE                 | 1.262                                                        | 4.376                          | 419.44             | 1835.45            | 5.522                          | 339.79             | 1876.26            |
| A_68_P21147672 | chr2:38210172-38210216                            | NM_010710:3367          | Lhx2          | INSIDE                 | 1.262                                                        | 1.957                          | 692.95             | 1356.06            | 2.470                          | 602.11             | 1487.38            |
| A_68_P22552362 | chr3:135148859-135148903                          | NM_027288:306           | Manba         | INSIDE                 | 1.262                                                        | 1.413                          | 1505.55            | 2127.31            | 1.783                          | 1209.33            | 2155.79            |
| A_68_P30345376 | chr15:75828233-75828277                           | NM_177922:4056          | Mapk15        | INSIDE                 | 1.262                                                        | 1.351                          | 2695.59            | 3642.36            | 1.705                          | 2137.07            | 3644.67            |
| A_68_P29263993 | chr13:100286596-100286640                         | NM_008634:-61           | Mtap1b        | PROMOTER               | 1.262                                                        | 2.033                          | 1083.30            | 2202.21            | 2.566                          | 828.90             | 2126.56            |
| A_68_P28538317 | chr12:74685599-74685643                           | NM_008856:-407          | Prkeh         | PROMOTER               | 1.262                                                        | 3.089                          | 473.04             | 1461.31            | 3.898                          | 413.37             | 1611.23            |
| A_68_P26078523 | chr8:97125990-97126034                            | NM_026274:172           | Rspry1        | INSIDE                 | 1.262                                                        | 3.000                          | 1418.85            | 4256.87            | 3.787                          | 1220.66            | 4622.56            |
| A_68_P28908966 | chr13:29044288-29044332                           | NM_009238:1241          | Sox4          | INSIDE                 | 1.262                                                        | 3.864                          | 1865.85            | 7210.05            | 4.877                          | 1550.62            | 7562.70            |
| A_68_P31149740 | chr17:33766012-33766058                           | NM_026712:-2            | Zfp414        | PROMOTER               | 1.262                                                        | 1.607                          | 934.59             | 1501.98            | 2.029                          | 848.57             | 1721.55            |
| A_68_P32180643 | chr19:53216882-53216926                           | NM_001164100:-341       | Add3          | PROMOTER               | 1.261                                                        | 1.908                          | 2712.37            | 5174.71            | 2.406                          | 2168.23            | 5216.17            |
| A_68_P27217140 | chr10:67739840-67739884                           | NM_023598:1612          | Arid5b        | INSIDE                 | 1.261                                                        | 1.572                          | 3850.89            | 6052.69            | 1.983                          | 2916.99            | 5783.27            |
| A_68_P31103785 | chr17:25571124-25571168                           | NM_001163691:-418       | Caena1h       | PROMOTER               | 1.261                                                        | 2.588                          | 638.28             | 1652.00            | 3.263                          | 581.57             | 1897.41            |
| A_68_P27914667 | chr11:72832981-72833025                           | NM_018883:493           | Camkk1        | INSIDE                 | 1.261                                                        | 2.415                          | 2544.85            | 6146.19            | 3.044                          | 1941.42            | 5910.36            |
| A_68_P25537055 | chr7:140005461-140005505                          | NM_212473:-603          | Fam53b        | PROMOTER               | 1.261                                                        | 1.648                          | 622.02             | 1024.98            | 2.078                          | 545.76             | 1134.10            |
| A_68_P27288983 | chr10:80800571-80800615                           | NM_148951:5419          | Gipc3         | INSIDE                 | 1.261                                                        | 6.444                          | 1747.06            | 11257.91           | 8.125                          | 1635.61            | 13289.59           |

| ProbeName      | Target position of probe on CpG island microarray | TargetID               | GeneSymbol    | CpG island Description | Ratio of relative methylation (TiO <sub>2</sub> -NP/Vehicle) | Sham group                     |                    |                    | TiO <sub>2</sub> -H group      |                    |                    |
|----------------|---------------------------------------------------|------------------------|---------------|------------------------|--------------------------------------------------------------|--------------------------------|--------------------|--------------------|--------------------------------|--------------------|--------------------|
|                |                                                   |                        |               |                        |                                                              | Relative methylation (Cy5/Cy3) | Cy3 signal (Input) | Cy5 signal (MeDIP) | Relative methylation (Cy5/Cy3) | Cy3 signal (Input) | Cy5 signal (MeDIP) |
| A_68_P24182263 | chr5:149739992-149740036                          | NM_153572:209          | Katnal1       | INSIDE                 | 1.261                                                        | 2.479                          | 2306.44            | 5717.72            | 3.125                          | 1892.74            | 5915.56            |
| A_68_P22569096 | chr3:138152576-138152620                          | NM_175224:-252         | Metap1        | PROMOTER               | 1.261                                                        | 1.426                          | 2629.55            | 3750.16            | 1.799                          | 2263.59            | 4072.42            |
| A_68_P27277569 | chr10:79017872-79017916                           | NM_027422:-58          | Mier2         | PROMOTER               | 1.261                                                        | 3.251                          | 1824.06            | 5929.55            | 4.099                          | 1517.89            | 6221.82            |
| A_68_P23985066 | chr5:111759743-111759787                          | NM_019640:-18          | Pitpnb        | PROMOTER               | 1.261                                                        | 7.780                          | 3564.89            | 27736.01           | 9.814                          | 2821.85            | 27693.78           |
| A_68_P28107260 | chr11:107331896-107331940                         | NM_145823:116          | Pitpnc1       | INSIDE                 | 1.261                                                        | 1.509                          | 2099.88            | 3168.64            | 1.902                          | 1617.06            | 3076.05            |
| A_68_P26747279 | chr9:96379047-96379091                            | NM_011279:-54          | Rnf7          | PROMOTER               | 1.261                                                        | 1.607                          | 1560.64            | 2508.41            | 2.027                          | 1285.61            | 2605.37            |
| A_68_P32752149 | chrX:149574498-149574542                          | NM_001004154:20        | Rragb         | INSIDE                 | 1.261                                                        | 1.419                          | 1020.49            | 1447.74            | 1.789                          | 467.47             | 836.21             |
| A_68_P29507583 | chr14:31529656-31529700                           | NM_001166532:878       | Sfmbt1        | INSIDE                 | 1.261                                                        | 1.723                          | 762.78             | 1314.11            | 2.173                          | 562.94             | 1223.06            |
| A_68_P23896967 | chr5:93371085-93371129                            | NM_001077596:44083     | Shroom3       | INSIDE                 | 1.261                                                        | 2.472                          | 616.95             | 1525.12            | 3.116                          | 560.31             | 1746.12            |
| A_68_P23138232 | chr4:98049719-98049763                            | NM_053157:216          | Tm2d1         | INSIDE                 | 1.261                                                        | 1.630                          | 1757.28            | 2864.79            | 2.056                          | 1281.48            | 2635.19            |
| A_68_P28595367 | chr12:85262475-85262519                           | ENSMUST00000085215:298 |               | INSIDE                 | 1.261                                                        | 2.286                          | 2725.85            | 6230.43            | 2.883                          | 2169.66            | 6254.06            |
| A_68_P28936243 | chr13:34129600-34129644                           | NM_026512:113          | Bphl          | INSIDE                 | 1.260                                                        | 1.709                          | 1055.28            | 1803.53            | 2.154                          | 920.53             | 1982.86            |
| A_68_P21013701 | chr2:12932877-12932921                            | NM_153155:-407         | C1ql3         | PROMOTER               | 1.260                                                        | 1.538                          | 741.66             | 1140.64            | 1.938                          | 641.86             | 1243.75            |
| A_68_P30382333 | chr15:82074905-82074949                           | NM_001080158:-160      | Cenpm         | PROMOTER               | 1.260                                                        | 1.400                          | 2750.92            | 3850.59            | 1.763                          | 2354.33            | 4150.79            |
| A_68_P21338895 | chr2:74536395-74536439                            | NM_013555:597          | Hoxd9         | INSIDE                 | 1.260                                                        | 4.123                          | 530.12             | 2185.73            | 5.196                          | 528.00             | 2743.38            |
| A_68_P25297068 | chr7:94395278-94395322                            | NM_015760:-4           | Nox4          | PROMOTER               | 1.260                                                        | 2.412                          | 1693.00            | 4084.35            | 3.040                          | 1732.65            | 5267.50            |
| A_68_P31676054 | chr18:46440414-46440458                           | NM_172627:68           | Pggt1b        | INSIDE                 | 1.260                                                        | 2.804                          | 3067.69            | 8600.89            | 3.533                          | 2521.06            | 8907.00            |
| A_68_P22261355 | chr3:78870478-78870522                            | NM_001099624:79297     | Rapgef2       | INSIDE                 | 1.260                                                        | 2.596                          | 783.77             | 2034.66            | 3.271                          | 675.06             | 2208.21            |
| A_68_P25269481 | chr7:88092293-88092339                            | NM_019951:120          | Sec11a        | INSIDE                 | 1.260                                                        | 1.693                          | 937.70             | 1587.43            | 2.133                          | 821.00             | 1751.35            |
| A_68_P25952981 | chr8:73133463-73133507                            | NM_133772:-1271        | Ssbp4         | DIVERGENT_PROMOTER     | 1.260                                                        | 2.255                          | 394.33             | 889.12             | 2.842                          | 368.14             | 1046.24            |
| A_68_P29052709 | chr13:55098533-55098577                           | NM_153131:47762        | Unc5a         | INSIDE                 | 1.260                                                        | 4.337                          | 855.43             | 3709.77            | 5.466                          | 688.37             | 3762.59            |
| A_68_P29751627 | chr14:79881898-79881942                           | NM_018765:-845         | Wbp4          | PROMOTER               | 1.260                                                        | 1.991                          | 729.66             | 1452.92            | 2.510                          | 807.53             | 2026.81            |
| A_68_P29308211 | chr13:108681537-108681581                         | NM_145456:-1300        | Zswim6        | PROMOTER               | 1.260                                                        | 2.235                          | 304.86             | 681.26             | 2.815                          | 323.56             | 910.98             |
| A_68_P26616432 | chr9:70269348-70269392                            | NM_007630:-9           | Cenb2         | PROMOTER               | 1.259                                                        | 1.590                          | 824.91             | 1311.72            | 2.003                          | 673.55             | 1348.96            |
| A_68_P23979393 | chr5:110815604-110815648                          | NM_028596:520          | Fbrs11        | INSIDE                 | 1.259                                                        | 2.320                          | 4562.39            | 10586.21           | 2.921                          | 3479.04            | 10161.39           |
| A_68_P26886029 | chr9:121766854-121766898                          | NM_001112668:-227      | Gm9790        | PROMOTER               | 1.259                                                        | 2.366                          | 1582.81            | 3745.12            | 2.979                          | 1311.32            | 3906.59            |
| A_68_P30252138 | chr15:58912850-58912894                           | NM_001146180:709       | Mtss1         | INSIDE                 | 1.259                                                        | 2.192                          | 1103.19            | 2417.70            | 2.758                          | 890.65             | 2456.67            |
| A_68_P28334787 | chr12:32745879-32745923                           | NM_011158:244          | Prkar2b       | INSIDE                 | 1.259                                                        | 2.257                          | 1069.46            | 2413.86            | 2.843                          | 1028.47            | 2923.59            |
| A_68_P23198163 | chr4:108551696-108551740                          | NM_023537:44           | Rab3b         | INSIDE                 | 1.259                                                        | 1.785                          | 1100.09            | 1963.71            | 2.247                          | 927.86             | 2084.84            |
| A_68_P30182585 | chr15:44619330-44619374                           | NM_001032727:257       | Sybu          | INSIDE                 | 1.259                                                        | 1.505                          | 724.39             | 1090.12            | 1.895                          | 657.24             | 1245.38            |
| A_68_P28599772 | chr12:86039566-86039610                           | NM_001033334:169       | Tmem90a       | INSIDE                 | 1.259                                                        | 2.630                          | 1669.08            | 4389.97            | 3.311                          | 2285.92            | 7569.48            |
| A_68_P22880599 | chr4:45025284-45025328                            | NM_001163283:-22       | Zbtb5         | DIVERGENT_PROMOTER     | 1.259                                                        | 1.751                          | 453.20             | 793.46             | 2.205                          | 395.90             | 872.84             |
| A_68_P32775150 | chrX:155970813-155970857                          | NM_001033472:235       | A830080D01Rik | INSIDE                 | 1.258                                                        | 3.634                          | 8123.73            | 29518.31           | 4.570                          | 3538.68            | 16172.23           |
| A_68_P23467740 | chr5:8367848-8367892                              | NM_001098225:211       | Adam22        | INSIDE                 | 1.258                                                        | 2.932                          | 1894.96            | 5555.31            | 3.687                          | 1639.52            | 6044.47            |
| A_68_P29487115 | chr14:28242859-28242903                           | NM_001114879:848       | D14Abbl e     | INSIDE                 | 1.258                                                        | 1.500                          | 807.19             | 1210.58            | 1.886                          | 675.25             | 1273.57            |
| A_68_P22872578 | chr4:43591698-43591742                            | NM_172692:16           | Gba2          | INSIDE                 | 1.258                                                        | 1.635                          | 796.77             | 1302.65            | 2.056                          | 789.83             | 1623.99            |
| A_68_P21579146 | chr2:120965951-120965995                          | NM_177846:462          | Lcmt2         | INSIDE                 | 1.258                                                        | 1.960                          | 333.19             | 653.11             | 2.465                          | 310.18             | 764.61             |
| A_68_P31491261 | chr18:10725960-10726004                           | NM_144860:360          | Mib1          | INSIDE                 | 1.258                                                        | 3.762                          | 332.18             | 1249.51            | 4.732                          | 355.47             | 1682.11            |
| A_68_P23279072 | chr4:125933108-125933155                          | NM_001145970:432       | Mtap7d1       | INSIDE                 | 1.258                                                        | 1.636                          | 598.76             | 979.55             | 2.058                          | 485.96             | 1000.11            |
| A_68_P22157982 | chr3:55987695-55987739                            | NM_030595:-93          | Nbea          | PROMOTER               | 1.258                                                        | 2.494                          | 2287.63            | 5706.15            | 3.139                          | 1915.11            | 6011.20            |
| A_68_P30346603 | chr15:76010310-76010354                           | NM_201394:15808        | Plec          | INSIDE                 | 1.258                                                        | 2.752                          | 974.82             | 2683.00            | 3.463                          | 761.69             | 2637.56            |
| A_68_P30477986 | chr15:98885749-98885793                           | NM_001163588:166       | Prph          | INSIDE                 | 1.258                                                        | 2.841                          | 915.53             | 2600.58            | 3.573                          | 788.72             | 2818.25            |
| A_68_P23230625 | chr4:116393777-116393821                          | NM_146151:239          | Tesk2         | INSIDE                 | 1.258                                                        | 1.767                          | 741.54             | 1310.29            | 2.223                          | 752.72             | 1673.26            |
| A_68_P20147880 | chr1:36426249-36426293                            | NM_172652:-244         | 4632411B12Rik | PROMOTER               | 1.257                                                        | 1.900                          | 884.01             | 1679.62            | 2.388                          | 794.29             | 1896.53            |
| A_68_P26073640 | chr8:96337458-96337502                            | NR_026888:-25          | 4930488L21Rik | PROMOTER               | 1.257                                                        | 2.599                          | 716.81             | 1862.82            | 3.266                          | 672.10             | 2195.04            |
| A_68_P24052104 | chr5:123213775-123213819                          | NM_001199976:15623     | Camk2         | INSIDE                 | 1.257                                                        | 8.629                          | 2862.22            | 24698.88           | 10.845                         | 1949.78            | 21144.95           |
| A_68_P32030718 | chr19:25684761-25684805                           | NM_177360:-244         | Dmrt3         | PROMOTER               | 1.257                                                        | 1.993                          | 1456.12            | 2902.01            | 2.505                          | 1264.38            | 3166.83            |
| A_68_P26587298 | chr9:65219738-65219782                            | NM_00111145:10894      | Gm514         | INSIDE                 | 1.257                                                        | 2.280                          | 1268.80            | 2892.48            | 2.865                          | 991.72             | 2840.91            |
| A_68_P30963191 | chr16:91485340-91485384                           | NM_010508:-97          | Ifnar1        | PROMOTER               | 1.257                                                        | 0.414                          | 1609.66            | 666.21             | 0.520                          | 1385.83            | 720.98             |
| A_68_P28748395 | chr12:113413871-113413915                         | NM_001097621:29474     | Kif26a        | INSIDE                 | 1.257                                                        | 1.780                          | 613.76             | 1092.79            | 2.238                          | 538.02             | 1203.95            |
| A_68_P21794483 | chr2:160191360-160191404                          | NM_010658:1419         | Matb          | INSIDE                 | 1.257                                                        | 1.977                          | 2459.23            | 4862.52            | 2.485                          | 1889.67            | 4694.90            |

| ProbeName      | Target position of probe on CpG island microarray | TargetID                | GeneSymbol | CpG island Description | Ratio of relative methylation (TiO <sub>2</sub> -NP/Vehicle) | Sham group                     |                    |                    | TiO <sub>2</sub> -H group      |                    |                    |
|----------------|---------------------------------------------------|-------------------------|------------|------------------------|--------------------------------------------------------------|--------------------------------|--------------------|--------------------|--------------------------------|--------------------|--------------------|
|                |                                                   |                         |            |                        |                                                              | Relative methylation (Cy5/Cy3) | Cy3 signal (Input) | Cy5 signal (MeDIP) | Relative methylation (Cy5/Cy3) | Cy3 signal (Input) | Cy5 signal (MeDIP) |
| A_68_P24946819 | chr7:3637588-3637632                              | NM_029934:7517          | Mboat7     | INSIDE                 | 1.257                                                        | 5.943                          | 2786.89            | 16563.16           | 7.473                          | 1934.76            | 14459.42           |
| A_68_P21820159 | chr2:164682781-164682825                          | NM_011125:406           | Plip       | INSIDE                 | 1.257                                                        | 2.532                          | 811.93             | 2056.19            | 3.184                          | 652.01             | 2076.25            |
| A_68_P23311885 | chr4:131901472-131901516                          | NM_001197082:171        | Rec1       | INSIDE                 | 1.257                                                        | 1.729                          | 1212.95            | 2097.30            | 2.174                          | 1098.83            | 2388.76            |
| A_68_P32672213 | chrX:131010426-131010470                          | NM_028958:581           | Taf7l      | INSIDE                 | 1.257                                                        | 1.726                          | 747.30             | 1290.15            | 2.170                          | 429.17             | 931.33             |
| A_68_P28430594 | A_68_P28430594                                    |                         | Unknown    |                        | 1.257                                                        | 1.403                          | 1638.93            | 2299.68            | 1.764                          | 1456.55            | 2568.90            |
| A_68_P32048665 | chr19:28754625-28754669                           | NM_175459:-79           | Gli3       | PROMOTER               | 1.256                                                        | 2.912                          | 1833.27            | 5338.16            | 3.658                          | 1549.37            | 5666.85            |
| A_68_P25957809 | chr8:74135189-74135233                            | NM_146211:288           | Glt25d1    | INSIDE                 | 1.256                                                        | 2.514                          | 1016.92            | 2556.94            | 3.159                          | 858.36             | 2711.51            |
| A_68_P27495356 | chr10:119549659-119549703                         | NM_080446:341           | Helb       | INSIDE                 | 1.256                                                        | 1.806                          | 2197.55            | 3968.05            | 2.268                          | 1785.92            | 4050.29            |
| A_68_P29612547 | chr14:55083035-55083079                           | NM_022993:73            | Lrp10      | INSIDE                 | 1.256                                                        | 2.007                          | 579.44             | 1163.20            | 2.521                          | 550.35             | 1387.47            |
| A_68_P24754176 | chr6:112439420-112439464                          | NM_001081147:360        | Oxtr       | INSIDE                 | 1.256                                                        | 2.240                          | 1047.14            | 2345.46            | 2.813                          | 877.56             | 2468.65            |
| A_68_P20121779 | chr1:30929974-30930018                            | NM_001081080:-9895      | Phf3       | PROMOTER               | 1.256                                                        | 1.671                          | 1353.19            | 2260.64            | 2.099                          | 1266.00            | 2657.44            |
| A_68_P28042484 | chr11:95985813-95985857                           | NM_172799:-9265         | Tll6       | PROMOTER               | 1.256                                                        | 2.473                          | 1829.70            | 4525.19            | 3.107                          | 1517.96            | 4715.79            |
| A_68_P21739398 | chr2:150296010-150296054                          | NM_001034900:14767      | Zfp345     | DOWNSTREAM             | 1.256                                                        | 4.441                          | 208.20             | 924.72             | 5.579                          | 208.77             | 1164.72            |
| A_68_P23622265 | chr5:39075785-39075829                            | NM_001081144:259        | Zfp518b    | INSIDE                 | 1.256                                                        | 2.098                          | 940.70             | 1973.56            | 2.636                          | 820.78             | 2163.48            |
| A_68_P27310644 | chr10:85292206-85292250                           |                         | Unknown    |                        | 1.256                                                        | 1.715                          | 413.09             | 708.65             | 2.154                          | 340.96             | 734.47             |
| A_68_P26215030 | chr8:122136802-122136846                          | NM_029428:178           | Adad2      | INSIDE                 | 1.255                                                        | 4.440                          | 1500.69            | 6662.80            | 5.572                          | 1316.93            | 7338.24            |
| A_68_P21021381 | chr2:14526447-14526491                            | NM_023116:536           | Caenb2     | INSIDE                 | 1.255                                                        | 2.841                          | 388.59             | 1103.86            | 3.566                          | 401.54             | 1431.70            |
| A_68_P27854485 | chr11:62352688-62352732                           | NM_028448:53            | Cenpv      | INSIDE                 | 1.255                                                        | 1.768                          | 431.71             | 763.10             | 2.218                          | 370.78             | 822.39             |
| A_68_P22317585 | chr3:88968583-88968627                            | NM_001163432:-122       | Clik2      | DIVERGENT_PROMOTER     | 1.255                                                        | 1.949                          | 1655.57            | 3226.14            | 2.445                          | 1458.68            | 3567.13            |
| A_68_P23417714 | chr4:151657357-151657401                          | NM_178406:8908          | Gpr153     | INSIDE                 | 1.255                                                        | 4.024                          | 896.71             | 3608.03            | 5.049                          | 725.94             | 3665.47            |
| A_68_P27284931 | chr10:80165309-80165353                           | NM_027829:-107          | Izumo4     | DIVERGENT_PROMOTER     | 1.255                                                        | 2.154                          | 3472.99            | 7480.59            | 2.703                          | 2761.71            | 7465.50            |
| A_68_P24112801 | chr5:135165012-135165056                          | NM_010717:-574          | Limk1      | PROMOTER               | 1.255                                                        | 1.398                          | 4835.47            | 6759.61            | 1.754                          | 3720.09            | 6526.85            |
| A_68_P31074428 | chr17:17761926-17761970                           | NM_172827:-495          | Lnpep      | PROMOTER               | 1.255                                                        | 1.640                          | 597.82             | 980.56             | 2.058                          | 546.44             | 1124.66            |
| A_68_P24322961 | chr6:28783190-28783234                            | NM_138682:-1465         | Lrrc4      | PROMOTER               | 1.255                                                        | 3.095                          | 400.64             | 1239.81            | 3.884                          | 343.20             | 1333.09            |
| A_68_P28514078 | chr12:70457923-70457967                           | NM_025441:209           | Nemf       | INSIDE                 | 1.255                                                        | 2.336                          | 441.75             | 1032.10            | 2.932                          | 386.83             | 1134.16            |
| A_68_P31935125 | chr19:6497430-6497474                             | NM_001205234:78715      | Nrxn2      | INSIDE                 | 1.255                                                        | 2.564                          | 1052.21            | 2697.86            | 3.217                          | 881.69             | 2836.68            |
| A_68_P23308580 | chr4:131392321-131392365                          | NM_001083119:1851       | Ptptr      | INSIDE                 | 1.255                                                        | 3.152                          | 2496.09            | 7867.54            | 3.955                          | 2080.41            | 8227.77            |
| A_68_P23298059 | chr4:129374001-129374045                          | NM_199305:60            | Tmem39b    | INSIDE                 | 1.255                                                        | 2.662                          | 1338.34            | 3562.54            | 3.341                          | 1198.59            | 4004.59            |
| A_68_P21106256 | chr2:30823480-30823525                            | NM_144884:-64           | Tor1a      | PROMOTER               | 1.255                                                        | 1.826                          | 1543.05            | 2817.87            | 2.291                          | 1327.78            | 3042.61            |
| A_68_P28225920 | chr12:9037077-9037121                             | NM_029321:296           | Tie32      | INSIDE                 | 1.255                                                        | 1.867                          | 652.72             | 1218.41            | 2.343                          | 555.85             | 1302.62            |
| A_68_P26215029 | chr8:122136700-122136744                          | NM_029428:76            | Adad2      | INSIDE                 | 1.254                                                        | 2.412                          | 1966.12            | 4741.77            | 3.025                          | 1515.18            | 4583.50            |
| A_68_P26815973 | chr9:108551515-108551559                          | NM_011790:175           | Arih2      | INSIDE                 | 1.254                                                        | 3.065                          | 2043.35            | 6263.27            | 3.845                          | 1670.50            | 6423.03            |
| A_68_P24039810 | chr5:121063118-121063162                          | NM_028041:2             | Ddx54      | INSIDE                 | 1.254                                                        | 2.009                          | 632.99             | 1271.96            | 2.520                          | 567.71             | 1430.74            |
| A_68_P21039675 | chr2:18314331-18314375                            | NM_001190817:105        | Dnajc1     | INSIDE                 | 1.254                                                        | 3.343                          | 1735.14            | 5801.30            | 4.191                          | 1635.49            | 6854.69            |
| A_68_P31961133 | chr19:12575663-12575707                           | NM_172442:802           | Dtx4       | INSIDE                 | 1.254                                                        | 2.065                          | 1796.76            | 3710.69            | 2.589                          | 1667.77            | 4318.13            |
| A_68_P24175500 | chr5:148537455-148537499                          | NM_010228:88            | Flt1       | INSIDE                 | 1.254                                                        | 1.938                          | 2214.58            | 4292.48            | 2.431                          | 1784.27            | 4337.91            |
| A_68_P31863856 | chr18:80560394-80560438                           | NM_001190373:577        | Keng2      | INSIDE                 | 1.254                                                        | 1.962                          | 862.04             | 1691.23            | 2.460                          | 726.69             | 1787.71            |
| A_68_P27787452 | chr11:50044549-50044593                           | NM_145926:5734          | Mgat4b     | INSIDE                 | 1.254                                                        | 1.582                          | 890.40             | 1408.64            | 1.983                          | 815.29             | 1617.05            |
| A_68_P21840225 | chr2:168056474-168056518                          | NM_001160330:375        | Mocs3      | INSIDE                 | 1.254                                                        | 1.963                          | 696.25             | 1366.70            | 2.461                          | 626.50             | 1541.96            |
| A_68_P23278957 | chr4:125914290-125914334                          | NM_001145970:19251      | Mtap7d1    | INSIDE                 | 1.254                                                        | 2.255                          | 1183.74            | 2669.29            | 2.827                          | 1219.20            | 3447.18            |
| A_68_P22063510 | chr3:37318580-37318625                            | NM_153561:-90           | Nudt6      | DIVERGENT_PROMOTER     | 1.254                                                        | 2.006                          | 6388.36            | 12815.74           | 2.515                          | 4755.52            | 11962.03           |
| A_68_P25953913 | chr8:73292527-73292571                            | NM_008841:8063          | Pik3r2     | INSIDE                 | 1.254                                                        | 2.721                          | 1388.85            | 3779.08            | 3.413                          | 1039.75            | 3548.34            |
| A_68_P25737024 | chr8:28285216-28285260                            | NM_001080813:-120       | Rab11fip1  | PROMOTER               | 1.254                                                        | 0.424                          | 1354.69            | 574.61             | 0.532                          | 1125.69            | 598.57             |
| A_68_P31254018 | chr17:56263505-56263549                           | NM_013662:9749          | Sema6b     | INSIDE                 | 1.254                                                        | 2.636                          | 2306.70            | 6081.40            | 3.306                          | 2033.01            | 6721.59            |
| A_68_P28613410 | chr12:88331231-88331275                           | NM_001080943:-1626      | Zdhhc22    | PROMOTER               | 1.254                                                        | 1.463                          | 2315.29            | 3386.43            | 1.834                          | 1850.91            | 3395.20            |
| A_68_P31021101 | A_68_P31021101                                    |                         | Unknown    |                        | 1.254                                                        | 2.723                          | 1778.53            | 4842.27            | 3.414                          | 1525.67            | 5208.72            |
| A_68_P32369652 | chrX:47013995-47014044                            | ENSMUST00000121891:-117 |            | PROMOTER               | 1.254                                                        | 3.826                          | 921.42             | 3525.12            | 4.797                          | 576.55             | 2765.75            |
| A_68_P31175229 | chr17:39983196-39983240                           | ENSMUST00000157647:-852 |            | PROMOTER               | 1.254                                                        | 2.739                          | 39185.03           | 107319.50          | 3.435                          | 30380.84           | 104357.00          |
| A_68_P25983697 | chr8:80041774-80041818                            | NM_030113:10            | Arhgap10   | INSIDE                 | 1.253                                                        | 3.323                          | 12185.98           | 40496.24           | 4.165                          | 11147.22           | 46430.04           |
| A_68_P30373741 | chr15:80502565-80502609                           | NM_145986:310           | Fam83f     | INSIDE                 | 1.253                                                        | 1.624                          | 965.76             | 1568.18            | 2.034                          | 793.11             | 1613.53            |
| A_68_P26761440 | chr9:98857399-98857443                            | NM_012020:1395          | Foxl2      | INSIDE                 | 1.253                                                        | 1.962                          | 1399.72            | 2745.84            | 2.458                          | 1150.67            | 2828.37            |

| ProbeName      | Target position of probe on CpG island microarray | TargetID            | GeneSymbol    | CpG island Description | Ratio of relative methylation (TiO <sub>2</sub> -NP/Vehicle) | Sham group                     |                    |                    | TiO <sub>2</sub> -H group      |                    |                    |
|----------------|---------------------------------------------------|---------------------|---------------|------------------------|--------------------------------------------------------------|--------------------------------|--------------------|--------------------|--------------------------------|--------------------|--------------------|
|                |                                                   |                     |               |                        |                                                              | Relative methylation (Cy5/Cy3) | Cy3 signal (Input) | Cy5 signal (MeDIP) | Relative methylation (Cy5/Cy3) | Cy3 signal (Input) | Cy5 signal (MeDIP) |
| A_68_P25174077 | chr7:71036413-71036457                            | NM_021366:47367     | Klfl3         | INSIDE                 | 1.253                                                        | 2.627                          | 2645.28            | 6948.37            | 3.292                          | 2137.35            | 7035.35            |
| A_68_P22843574 | chr4:36897680-36897724                            | NM_001165999:1075   | Lingo2        | INSIDE                 | 1.253                                                        | 1.871                          | 2352.98            | 4402.81            | 2.345                          | 1851.84            | 4342.34            |
| A_68_P32374346 | chrX:48371757-48371801                            | NM_172413:-583      | Rap2c         | PROMOTER               | 1.253                                                        | 3.212                          | 955.15             | 3068.30            | 4.024                          | 599.40             | 2412.03            |
| A_68_P21071032 | chr2:25127662-25127706                            | NM_023464:254       | Ssna1         | INSIDE                 | 1.253                                                        | 1.461                          | 1609.96            | 2351.59            | 1.830                          | 1387.39            | 2539.33            |
| A_68_P25269100 | chr7:88020745-88020789                            | NM_009553:13773     | Zscan2        | INSIDE                 | 1.253                                                        | 2.711                          | 817.16             | 2215.20            | 3.396                          | 859.95             | 2920.09            |
| A_68_P22349550 | chr3:96279054-96279098                            | AK136676:11082      |               | DOWNSTREAM             | 1.253                                                        | 2.531                          | 2449.39            | 6200.52            | 3.173                          | 1818.44            | 5769.75            |
| A_68_P21320133 | chr2:71383777-71383821                            | NM_010054:1013      | Dlx2          | INSIDE                 | 1.252                                                        | 2.504                          | 2332.47            | 5840.69            | 3.136                          | 1692.50            | 5306.90            |
| A_68_P28280007 | chr12:21322457-21322501                           | NM_026347:226       | lah1          | INSIDE                 | 1.252                                                        | 1.925                          | 2547.57            | 4903.56            | 2.410                          | 2111.50            | 5089.48            |
| A_68_P23952342 | chr5:104888645-104888689                          | NM_008861:191       | Pkd2          | INSIDE                 | 1.252                                                        | 2.516                          | 1426.52            | 3589.11            | 3.150                          | 1279.33            | 4029.61            |
| A_68_P26609884 | chr9:69138237-69138281                            | NM_013646:636650    | Rora          | INSIDE                 | 1.252                                                        | 4.291                          | 1258.44            | 5400.33            | 5.372                          | 1049.61            | 5638.89            |
| A_68_P21721819 | chr2:146839148-146839192                          | NM_011917:375       | Xm2           | INSIDE                 | 1.252                                                        | 1.811                          | 1090.27            | 1974.33            | 2.267                          | 938.59             | 2128.13            |
| A_68_P26721481 | chr9:91256506-91256550                            | NM_009573:4109      | Zic1          | INSIDE                 | 1.252                                                        | 1.563                          | 2690.50            | 4205.14            | 1.957                          | 2291.20            | 4482.97            |
| A_68_P26020489 | chr8:87082904-87082948                            | NM_007578:143664    | Caena1a       | INSIDE                 | 1.251                                                        | 2.350                          | 379.98             | 892.90             | 2.939                          | 295.37             | 868.08             |
| A_68_P23396572 | chr4:148178339-148178383                          | NM_027195:-140      | Cas21         | PROMOTER               | 1.251                                                        | 2.175                          | 1480.69            | 3220.91            | 2.721                          | 1383.52            | 3764.80            |
| A_68_P26346393 | chr9:21095562-21095606                            | NM_009878:69        | Cdkn2d        | INSIDE                 | 1.251                                                        | 2.226                          | 1410.42            | 3139.36            | 2.784                          | 1238.73            | 3448.90            |
| A_68_P31565719 | chr18:25645825-25645869                           | NM_001146292:266638 | Celf4         | INSIDE                 | 1.251                                                        | 1.585                          | 4330.36            | 6864.65            | 1.983                          | 3473.65            | 6888.99            |
| A_68_P25026496 | chr7:30093082-30093126                            | NM_013874:4081      | Dpf1          | INSIDE                 | 1.251                                                        | 1.387                          | 2087.54            | 2895.78            | 1.735                          | 1802.08            | 3126.91            |
| A_68_P26804375 | chr9:106553157-106553201                          | NM_001160353:5262   | Grm2          | INSIDE                 | 1.251                                                        | 2.376                          | 806.06             | 1915.49            | 2.972                          | 647.93             | 1925.83            |
| A_68_P32507214 | chrX:83022249-83022295                            | NM_008194:-114      | Gyk           | PROMOTER               | 1.251                                                        | 2.527                          | 7443.77            | 18807.17           | 3.162                          | 2946.17            | 9315.16            |
| A_68_P29942854 | chr14:119537426-119537470                         | NM_015820:-38       | Hsf6st3       | PROMOTER               | 1.251                                                        | 2.184                          | 1018.57            | 2224.87            | 2.734                          | 895.53             | 2447.96            |
| A_68_P26531859 | chr9:55388856-55388900                            | NM_027397:-77       | Isl2          | PROMOTER               | 1.251                                                        | 1.977                          | 1348.32            | 2665.63            | 2.473                          | 1058.16            | 2616.70            |
| A_68_P29643581 | chr14:60870353-60870397                           | NM_170591:-159      | Nupl1         | PROMOTER               | 1.251                                                        | 1.457                          | 1534.07            | 2235.00            | 1.822                          | 1437.44            | 2619.62            |
| A_68_P27551121 | chr11:3189955-3189999                             | NM_019574:-483      | Patz1         | PROMOTER               | 1.251                                                        | 0.267                          | 2158.38            | 576.62             | 0.334                          | 2034.03            | 679.80             |
| A_68_P22825645 | chr4:33276560-33276604                            | NM_001034867:130    | Pm20d2        | INSIDE                 | 1.251                                                        | 1.735                          | 427.62             | 742.12             | 2.171                          | 503.58             | 1093.02            |
| A_68_P22774391 | chr4:21616366-21616410                            | NM_001080771:-3278  | Prdm13        | PROMOTER               | 1.251                                                        | 2.757                          | 2142.24            | 5906.92            | 3.449                          | 1784.60            | 6155.69            |
| A_68_P26044785 | chr8:91566664-91566708                            | NM_021390:1375      | Sall1         | INSIDE                 | 1.251                                                        | 3.706                          | 1383.72            | 5127.86            | 4.638                          | 1276.13            | 5918.42            |
| A_68_P28685881 | chr12:102321902-102321946                         | NM_001160214:-12    | Smek1         | PROMOTER               | 1.251                                                        | 1.560                          | 984.82             | 1536.02            | 1.951                          | 823.90             | 1607.71            |
| A_68_P30140501 | chr15:36723049-36723093                           | NM_011740:1223      | Ywhaz         | INSIDE                 | 1.251                                                        | 1.936                          | 859.32             | 1663.60            | 2.422                          | 757.21             | 1834.07            |
| A_68_P30421089 | chr15:88581968-88582012                           | NM_181412:-150      | Zbed4         | PROMOTER               | 1.251                                                        | 3.399                          | 901.63             | 3064.42            | 4.254                          | 786.58             | 3345.72            |
| A_68_P24427165 | chr6:48388397-48388441                            | NM_001085415:6671   | Zfp467        | INSIDE                 | 1.251                                                        | 1.899                          | 904.07             | 1717.15            | 2.375                          | 750.32             | 1782.38            |
| A_68_P24359960 | chr6:35084098-35084143                            | NM_001164412:-383   | Cnot4         | PROMOTER               | 1.250                                                        | 2.009                          | 374.97             | 753.48             | 2.512                          | 264.96             | 665.48             |
| A_68_P23361674 | chr4:140581469-140581513                          | NM_172122:28086     | Crocc         | INSIDE                 | 1.250                                                        | 3.563                          | 1418.80            | 5054.93            | 4.452                          | 1161.68            | 5171.60            |
| A_68_P21428541 | chr2:92274385-92274429                            | NM_009963:-180      | Cry2          | PROMOTER               | 1.250                                                        | 2.007                          | 1118.40            | 2244.95            | 2.509                          | 952.02             | 2389.02            |
| A_68_P28528480 | chr12:72932514-72932558                           | NM_026102:472       | Daam1         | INSIDE                 | 1.250                                                        | 1.683                          | 773.54             | 1302.08            | 2.103                          | 616.61             | 1296.98            |
| A_68_P27756940 | chr11:44431798-44431842                           | NM_007897:185       | Ebf1          | INSIDE                 | 1.250                                                        | 1.805                          | 632.04             | 1140.54            | 2.256                          | 557.00             | 1256.54            |
| A_68_P25405197 | chr7:116094538-116094582                          | NM_025344:16632     | Eif3f         | DOWNSTREAM             | 1.250                                                        | 1.776                          | 1707.42            | 3033.02            | 2.221                          | 1448.00            | 3215.73            |
| A_68_P23190563 | chr4:107107680-107107724                          | NM_147221:379       | Gli3          | INSIDE                 | 1.250                                                        | 2.218                          | 1538.18            | 3411.78            | 2.772                          | 1206.59            | 3344.16            |
| A_68_P21137828 | chr2:35959503-35959547                            | NM_001083126:56     | Lhx6          | INSIDE                 | 1.250                                                        | 1.416                          | 1058.01            | 1498.53            | 1.770                          | 851.85             | 1507.96            |
| A_68_P25087543 | chr7:51716772-51716816                            | NM_198250:18938     | Lrrc4b        | INSIDE                 | 1.250                                                        | 2.630                          | 1253.41            | 3295.97            | 3.286                          | 1017.05            | 3342.01            |
| A_68_P21375627 | chr2:80421060-80421104                            | NM_016965:40        | Nekap1        | INSIDE                 | 1.250                                                        | 1.974                          | 843.92             | 1665.98            | 2.467                          | 774.98             | 1911.64            |
| A_68_P28573810 | chr12:81210978-81211022                           | NM_007564:3000      | Zfp361        | INSIDE                 | 1.250                                                        | 1.337                          | 2953.82            | 3948.56            | 1.671                          | 2208.98            | 3690.24            |
| A_68_P30534533 | chr16:8830219-8830263                             | NM_001081400:48     | 1810013L24Rik | INSIDE                 | 1.249                                                        | 3.202                          | 933.62             | 2989.05            | 3.999                          | 846.83             | 3386.17            |
| A_68_P20425272 | chr1:90599100-90599144                            | NM_177305:-356      | Arl4c         | PROMOTER               | 1.249                                                        | 1.507                          | 2518.27            | 3794.37            | 1.882                          | 2142.19            | 4032.23            |
| A_68_P22408448 | chr3:107563100-107563144                          | NM_001113529:265    | Csf1          | INSIDE                 | 1.249                                                        | 1.689                          | 1528.31            | 2581.97            | 2.111                          | 1210.48            | 2554.77            |
| A_68_P24123508 | chr5:137357952-137357996                          | NM_024474:1003      | Emid2         | INSIDE                 | 1.249                                                        | 2.263                          | 1647.57            | 3728.44            | 2.826                          | 1424.76            | 4027.07            |
| A_68_P31373922 | chr17:79234408-79234452                           | NM_001081179:291    | Heat5b        | INSIDE                 | 1.249                                                        | 2.023                          | 1507.44            | 3050.29            | 2.527                          | 1264.86            | 3195.69            |
| A_68_P29863085 | chr14:103381169-103381213                         | NM_177715:664       | Ketd12        | INSIDE                 | 1.249                                                        | 2.755                          | 709.75             | 1955.27            | 3.440                          | 586.77             | 2018.46            |
| A_68_P29592278 | chr14:49792394-49792438                           | NM_001081430:515    | Naa30         | INSIDE                 | 1.249                                                        | 6.468                          | 383.49             | 2480.53            | 8.978                          | 375.30             | 3031.71            |
| A_68_P31633859 | chr18:38578724-38578769                           | NM_022996:118       | Ndfip1        | INSIDE                 | 1.249                                                        | 2.818                          | 1181.57            | 3329.78            | 3.519                          | 1156.64            | 4069.83            |
| A_68_P24643139 | chr6:92041412-92041456                            | NM_011630:23        | Nr2c2         | INSIDE                 | 1.249                                                        | 2.277                          | 202.79             | 461.85             | 2.845                          | 225.16             | 640.67             |
| A_68_P22085571 | chr3:41369106-41369150                            | NM_001130186:327    | Phf17         | INSIDE                 | 1.249                                                        | 2.198                          | 634.87             | 1395.22            | 2.745                          | 559.02             | 1534.59            |



| ProbeName      | Target position of probe on CpG island microarray | TargetID                 | GeneSymbol    | CpG island Description | Ratio of relative methylation (TiO <sub>2</sub> -NP/Vehicle) | Sham group                     |                    |                    | TiO <sub>2</sub> -H group      |                    |                    |
|----------------|---------------------------------------------------|--------------------------|---------------|------------------------|--------------------------------------------------------------|--------------------------------|--------------------|--------------------|--------------------------------|--------------------|--------------------|
|                |                                                   |                          |               |                        |                                                              | Relative methylation (Cy5/Cy3) | Cy3 signal (Input) | Cy5 signal (MeDIP) | Relative methylation (Cy5/Cy3) | Cy3 signal (Input) | Cy5 signal (MeDIP) |
| A_68_P20559397 | chr1:121809874-121809922                          | NM_175106:-153           | Tmem177       | PROMOTER               | 1.249                                                        | 2.032                          | 1437.86            | 2921.97            | 2.538                          | 1112.11            | 2822.68            |
| A_68_P30350974 | chr15:76701808-76701852                           | NM_001007568:35          | Zfp251        | INSIDE                 | 1.249                                                        | 2.382                          | 1279.27            | 3046.72            | 2.974                          | 1171.82            | 3485.14            |
| A_68_P32565198 | chrX:98892284-98892328                            | ENSMUST00000073812:-5117 |               | PROMOTER               | 1.249                                                        | 4.292                          | 7463.45            | 32031.83           | 5.362                          | 2638.28            | 14146.88           |
| A_68_P32700324 | chrX:137199916-137199960                          | ENSMUST00000112988:328   |               | INSIDE                 | 1.249                                                        | 3.576                          | 838.25             | 2997.85            | 4.468                          | 633.56             | 2830.49            |
| A_68_P28050436 | chr11:97277448-97277492                           | ENSMUST00000121799:624   |               | INSIDE                 | 1.249                                                        | 1.790                          | 1266.29            | 2266.28            | 2.235                          | 1023.72            | 2287.88            |
| A_68_P28708611 | chr12:106575425-106575469                         | ENSMUST00000138649:244   |               | INSIDE                 | 1.249                                                        | 2.424                          | 1565.31            | 3794.23            | 3.026                          | 1344.56            | 4069.29            |
| A_68_P31408618 | chr17:85490170-85490214                           | NM_028576:153            | 1700106N22Rik | INSIDE                 | 1.248                                                        | 1.567                          | 624.98             | 979.26             | 1.956                          | 588.22             | 1150.36            |
| A_68_P27473560 | chr10:115551150-115551194                         | NM_001161855:-199        | 4933416C03Rik | PROMOTER               | 1.248                                                        | 2.323                          | 978.87             | 2274.16            | 2.898                          | 869.20             | 2519.38            |
| A_68_P27033507 | chr10:28867124-28867168                           | NM_026138:3345           | 6330407J23Rik | INSIDE                 | 1.248                                                        | 1.815                          | 878.14             | 1594.23            | 2.266                          | 763.35             | 1729.89            |
| A_68_P20239572 | chr1:54982610-54982654                            | NM_001081433:599         | Ankrd44       | INSIDE                 | 1.248                                                        | 1.767                          | 4378.24            | 7738.53            | 2.205                          | 3378.41            | 7449.77            |
| A_68_P22609989 | chr3:145316674-145316720                          | NM_010516:-3747          | Cyr61         | PROMOTER               | 1.248                                                        | 1.523                          | 622.12             | 947.61             | 1.900                          | 519.34             | 986.94             |
| A_68_P21874518 | chr2:174125914-174125958                          | NM_201617:2577           | Gnas          | INSIDE                 | 1.248                                                        | 1.725                          | 449.44             | 775.29             | 2.152                          | 375.13             | 807.45             |
| A_68_P25954565 | chr8:73387047-73387091                            | NM_032397:-6161          | Kenn1         | PROMOTER               | 1.248                                                        | 1.781                          | 637.74             | 1136.03            | 2.223                          | 524.25             | 1165.42            |
| A_68_P20127131 | chr1:32229533-32229577                            | NM_133235:-96            | Khdrbs2       | PROMOTER               | 1.248                                                        | 2.929                          | 459.35             | 1345.58            | 3.655                          | 463.67             | 1694.54            |
| A_68_P30619231 | chr16:26105726-26105770                           | NM_173379:122            | Leprel1       | INSIDE                 | 1.248                                                        | 1.960                          | 2895.74            | 5676.76            | 2.446                          | 2358.79            | 5770.00            |
| A_68_P25279952 | chr7:90016468-90016512                            | NM_175366:648            | Mex3b         | INSIDE                 | 1.248                                                        | 1.562                          | 1292.65            | 2019.13            | 1.950                          | 1109.58            | 2163.80            |
| A_68_P26254550 | chr8:128421964-128422008                          | NM_175561:207            | Penx12        | INSIDE                 | 1.248                                                        | 1.925                          | 1505.98            | 2898.63            | 2.403                          | 1332.47            | 3201.93            |
| A_68_P27911828 | chr11:72303091-72303135                           | NM_153060:294            | Spns2         | INSIDE                 | 1.248                                                        | 2.134                          | 2299.51            | 4906.38            | 2.662                          | 1991.47            | 5302.04            |
| A_68_P33005935 | A_68_P33005935                                    |                          |               | Unknown                | 1.248                                                        | 2.549                          | 518.79             | 1322.28            | 3.181                          | 515.51             | 1639.89            |
| A_68_P27283432 | chr10:79934830-79934874                           | ENSMUST00000158603:-4244 |               | PROMOTER               | 1.248                                                        | 2.273                          | 1428.07            | 3245.31            | 2.835                          | 1292.75            | 3664.93            |
| A_68_P29335934 | chr13:113442566-113442610                         | NM_001145885:-70         | Ddx4          | DIVERGENT_PROMOTER     | 1.247                                                        | 2.866                          | 962.97             | 2760.00            | 3.573                          | 790.58             | 2824.84            |
| A_68_P27171225 | chr10:59342512-59342556                           | NM_019965:196            | Dnajb12       | INSIDE                 | 1.247                                                        | 1.650                          | 849.75             | 1402.47            | 2.059                          | 740.09             | 1523.76            |
| A_68_P27145715 | chr10:53795287-53795331                           | NM_008548:294            | Man1a         | INSIDE                 | 1.247                                                        | 2.146                          | 2354.40            | 5052.54            | 2.676                          | 2030.45            | 5432.77            |
| A_68_P24443350 | chr6:51220702-51220746                            | NR_029719:-815           | Mir148a       | PROMOTER               | 1.247                                                        | 2.025                          | 1306.70            | 2645.72            | 2.525                          | 1202.64            | 3036.11            |
| A_68_P26343627 | chr9:20532217-20532261                            | NM_173777:420            | Olfm2         | INSIDE                 | 1.247                                                        | 5.191                          | 2293.17            | 11902.71           | 6.471                          | 1822.08            | 11789.95           |
| A_68_P20598628 | chr1:130000152-130000196                          | NM_181750:292            | R3hdm1        | INSIDE                 | 1.247                                                        | 2.327                          | 1148.90            | 2673.45            | 2.901                          | 966.62             | 2803.99            |
| A_68_P25504562 | chr7:134352166-134352210                          | NM_144522:-206           | Tbc1d10b      | DIVERGENT_PROMOTER     | 1.247                                                        | 1.536                          | 1015.11            | 1559.03            | 1.915                          | 881.88             | 1688.82            |
| A_68_P27416798 | chr10:105011030-105011074                         | NM_177368:483            | Tmtc2         | INSIDE                 | 1.247                                                        | 1.573                          | 1697.16            | 2668.91            | 1.960                          | 1221.25            | 2394.00            |
| A_68_P23141229 | chr4:98591079-98591123                            | NM_146144:600            | Usp1          | INSIDE                 | 1.247                                                        | 1.659                          | 1472.95            | 2443.54            | 2.068                          | 1301.96            | 2692.76            |
| A_68_P23196091 | chr4:108132080-108132124                          | NM_175472:72             | Zec1c11       | INSIDE                 | 1.247                                                        | 2.526                          | 1748.34            | 4416.82            | 3.149                          | 1504.96            | 4739.78            |
| A_68_P24783630 | chr6:117791108-117791152                          | NM_177684:-129           | Zfp637        | PROMOTER               | 1.247                                                        | 1.687                          | 1611.83            | 2718.42            | 2.103                          | 1410.60            | 2965.94            |
| A_68_P26888895 | chr9:122260872-122260916                          | NM_026179:161            | Abhd5         | INSIDE                 | 1.246                                                        | 3.749                          | 970.64             | 3638.97            | 4.671                          | 871.24             | 4069.51            |
| A_68_P31259474 | chr17:57136971-57137015                           | NM_025538:231            | Alkbh7        | INSIDE                 | 1.246                                                        | 1.713                          | 2572.73            | 4408.24            | 2.136                          | 2124.39            | 4536.82            |
| A_68_P27897123 | chr11:69609071-69609115                           | NM_009601:347            | Chrb1         | INSIDE                 | 1.246                                                        | 1.952                          | 1126.95            | 2200.28            | 2.432                          | 899.88             | 2188.72            |
| A_68_P25804898 | chr8:41393101-41393145                            | NM_030110:-282           | Etha2         | PROMOTER               | 1.246                                                        | 2.471                          | 304.12             | 751.41             | 3.079                          | 260.66             | 802.66             |
| A_68_P23416685 | chr4:151500131-151500175                          | NM_019585:2882           | Espn          | INSIDE                 | 1.246                                                        | 1.569                          | 1559.72            | 2447.18            | 1.955                          | 1150.05            | 2248.46            |
| A_68_P28463194 | chr12:58643991-58644035                           | NM_008259:3096           | Foxa1         | INSIDE                 | 1.246                                                        | 1.651                          | 1395.56            | 2304.44            | 2.057                          | 1202.32            | 2473.16            |
| A_68_P23300608 | chr4:129815629-129815674                          | NM_001163027:144         | Hertr1        | INSIDE                 | 1.246                                                        | 3.318                          | 971.37             | 3223.16            | 4.134                          | 849.45             | 3511.44            |
| A_68_P29604766 | chr14:52724118-52724162                           | NM_001170981:-437        | Hnrmpc        | DIVERGENT_PROMOTER     | 1.246                                                        | 1.788                          | 1184.33            | 2117.22            | 2.227                          | 871.76             | 1941.82            |
| A_68_P24051357 | chr5:123064217-123064261                          | NM_009879:289            | Ifi81         | INSIDE                 | 1.246                                                        | 1.726                          | 1134.07            | 1956.96            | 2.151                          | 967.09             | 2079.93            |
| A_68_P26374351 | chr9:26962634-26962678                            | NM_023277:350            | Jam3          | INSIDE                 | 1.246                                                        | 3.139                          | 541.16             | 1698.71            | 3.912                          | 521.35             | 2039.76            |
| A_68_P28105679 | chr11:107050342-107050386                         | NM_001161329:331         | Nol11         | INSIDE                 | 1.246                                                        | 2.317                          | 3249.95            | 7530.63            | 2.888                          | 2457.12            | 7095.70            |
| A_68_P22878647 | chr4:44717142-44717186                            | NM_008782:6148           | Pax5          | INSIDE                 | 1.246                                                        | 1.638                          | 1243.00            | 2036.06            | 2.041                          | 1224.49            | 2499.58            |
| A_68_P31113239 | chr17:27070188-27070232                           | NM_009343:139            | Phf1          | INSIDE                 | 1.246                                                        | 1.438                          | 2313.67            | 3327.70            | 1.793                          | 1950.38            | 3496.13            |
| A_68_P30423673 | chr15:89004061-89004105                           | NM_001159521:198         | Plxnb2        | INSIDE                 | 1.246                                                        | 3.391                          | 1934.89            | 6561.95            | 4.225                          | 1570.38            | 6635.07            |
| A_68_P24694202 | chr6:100784182-100784226                          | NM_182939:573            | Ppp4r2        | INSIDE                 | 1.246                                                        | 1.430                          | 2138.05            | 3058.07            | 1.782                          | 1461.44            | 2604.03            |
| A_68_P26136629 | chr8:108424268-108424312                          | NM_173432:-83            | Pskh1         | PROMOTER               | 1.246                                                        | 2.322                          | 720.89             | 1673.83            | 2.893                          | 633.05             | 1831.72            |
| A_68_P27836018 | chr11:59102804-59102848                           | NM_009522:1427           | Wnt3a         | INSIDE                 | 1.246                                                        | 2.282                          | 2968.11            | 6773.89            | 2.844                          | 2429.64            | 6909.10            |
| A_68_P28037459 | chr11:95084648-95084692                           | ENSMUST00000150818:2276  |               | INSIDE                 | 1.246                                                        | 5.041                          | 2103.01            | 10600.95           | 6.282                          | 1573.34            | 9884.37            |
| A_68_P22503483 | chr3:126300156-126300200                          | NM_001025438:288         | Camk2d        | INSIDE                 | 1.245                                                        | 1.465                          | 916.26             | 1342.64            | 1.825                          | 793.31             | 1447.43            |
| A_68_P27234933 | chr10:70807476-70807520                           | NM_134007:99             | Cisd1         | INSIDE                 | 1.245                                                        | 2.459                          | 1162.36            | 2858.70            | 3.062                          | 1080.51            | 3308.04            |

| ProbeName      | Target position of probe on CpG island microarray | TargetID           | GeneSymbol | CpG island Description | Ratio of relative methylation (TiO <sub>2</sub> -NP/Vehicle) | Sham group                     |                    |                    | TiO <sub>2</sub> -H group      |                    |                    |
|----------------|---------------------------------------------------|--------------------|------------|------------------------|--------------------------------------------------------------|--------------------------------|--------------------|--------------------|--------------------------------|--------------------|--------------------|
|                |                                                   |                    |            |                        |                                                              | Relative methylation (Cy5/Cy3) | Cy3 signal (Input) | Cy5 signal (MeDIP) | Relative methylation (Cy5/Cy3) | Cy3 signal (Input) | Cy5 signal (MeDIP) |
| A_68_P22614660 | chr3:146113432-146113476                          | NM_028836:-2       | Ctbs       | PROMOTER               | 1.245                                                        | 1.902                          | 2950.13            | 5611.33            | 2.368                          | 2334.24            | 5526.49            |
| A_68_P25394427 | chr7:112936384-112936433                          | NM_001162943:-344  | Dehs1      | PROMOTER               | 1.245                                                        | 3.206                          | 1009.19            | 3234.97            | 3.991                          | 648.44             | 2587.87            |
| A_68_P23283633 | chr4:126803154-126803198                          | NM_001099319:-113  | Gm12942    | PROMOTER               | 1.245                                                        | 1.513                          | 956.11             | 1446.22            | 1.884                          | 785.53             | 1479.87            |
| A_68_P28577469 | chr12:81858735-81858779                           | NM_001008423:2946  | Gm1568     | INSIDE                 | 1.245                                                        | 3.214                          | 1389.69            | 4466.02            | 4.000                          | 1106.08            | 4424.17            |
| A_68_P27163122 | chr10:57786302-57786346                           | NM_026148:111      | Lims1      | INSIDE                 | 1.245                                                        | 3.692                          | 656.53             | 2423.74            | 4.598                          | 610.74             | 2808.12            |
| A_68_P25189684 | chr7:73834910-73834954                            | NM_001191001:158   | Lins       | INSIDE                 | 1.245                                                        | 1.707                          | 1319.84            | 2252.58            | 2.124                          | 1110.91            | 2359.62            |
| A_68_P25031209 | chr7:31145387-31145431                            | NM_175478:2383     | Lrfn3      | INSIDE                 | 1.245                                                        | 2.575                          | 466.90             | 1202.28            | 3.205                          | 454.22             | 1455.67            |
| A_68_P27284768 | chr10:80139566-80139610                           | NM_021462:-4867    | Mknk2      | PROMOTER               | 1.245                                                        | 1.506                          | 1548.45            | 2331.61            | 1.874                          | 1166.29            | 2185.59            |
| A_68_P29585963 | chr14:48740738-48740782                           | NM_033602:217      | Peli2      | INSIDE                 | 1.245                                                        | 1.701                          | 1478.59            | 2515.67            | 2.118                          | 1338.33            | 2834.88            |
| A_68_P25026383 | chr7:30074297-30074341                            | NM_026731:-20      | Ppp1r14a   | DIVERGENT_PROMOTER     | 1.245                                                        | 2.661                          | 1096.87            | 2918.96            | 3.313                          | 907.54             | 3006.67            |
| A_68_P26349533 | chr9:21722608-21722652                            | NM_031874:-65      | Rab3d      | PROMOTER               | 1.245                                                        | 1.353                          | 3484.91            | 4713.97            | 1.685                          | 3009.85            | 5070.84            |
| A_68_P30575874 | chr16:17815530-17815575                           | NM_153790:18178    | Scarf2     | DOWNSTREAM             | 1.245                                                        | 4.568                          | 1222.80            | 5585.25            | 5.685                          | 1053.27            | 5987.68            |
| A_68_P29421305 | chr14:15535746-15535790                           | NM_001033270:230   | Ste4a7     | INSIDE                 | 1.245                                                        | 2.894                          | 1173.65            | 3397.03            | 3.603                          | 974.75             | 3512.40            |
| A_68_P21749133 | chr2:152224628-152224672                          | NM_011438:-868     | Sox12      | PROMOTER               | 1.245                                                        | 1.800                          | 485.24             | 873.51             | 2.241                          | 443.37             | 993.47             |
| A_68_P32672216 | chrX:131010833-131010877                          | NM_028958:175      | Taf7l      | INSIDE                 | 1.245                                                        | 1.871                          | 582.99             | 1090.56            | 2.328                          | 337.70             | 786.28             |
| A_68_P28536526 | chr12:74387399-74387443                           | NM_029580:278      | Trmt5      | INSIDE                 | 1.245                                                        | 0.452                          | 1178.56            | 532.24             | 0.562                          | 1006.04            | 565.85             |
| A_68_P29950628 | A_68_P29950628                                    |                    |            | Unknown                | 1.245                                                        | 2.174                          | 1561.10            | 3393.72            | 2.706                          | 1412.12            | 3820.79            |
| A_68_P28725239 | chr12:109244424-109244468                         | NM_001079883:-2822 | Bell1b     | PROMOTER               | 1.244                                                        | 1.391                          | 1623.33            | 2257.30            | 1.730                          | 1382.98            | 2392.33            |
| A_68_P20456920 | chr1:95583181-95583225                            | NM_016778:932      | Bok        | INSIDE                 | 1.244                                                        | 2.225                          | 647.81             | 1441.29            | 2.768                          | 599.15             | 1658.48            |
| A_68_P31620309 | chr18:35990795-35990839                           | NM_133687:1345     | Cxcx5      | INSIDE                 | 1.244                                                        | 1.769                          | 1890.23            | 3343.00            | 2.201                          | 1524.20            | 3354.40            |
| A_68_P27281217 | chr10:79602092-79602136                           | NR_036582:-2       | Dos        | DIVERGENT_PROMOTER     | 1.244                                                        | 1.549                          | 1805.92            | 2797.64            | 1.927                          | 1438.56            | 2772.35            |
| A_68_P26132769 | chr8:107814164-107814208                          | NM_177788:5812     | Exoc3l     | INSIDE                 | 1.244                                                        | 1.571                          | 1164.82            | 1829.53            | 1.954                          | 1012.60            | 1978.53            |
| A_68_P28080758 | chr11:102526866-102526910                         | NM_001127576:-13   | Gm1564     | PROMOTER               | 1.244                                                        | 2.990                          | 2089.75            | 6248.75            | 3.719                          | 1642.64            | 6108.78            |
| A_68_P27812448 | chr11:54680388-54680432                           | NM_008248:471      | Hint1      | INSIDE                 | 1.244                                                        | 1.744                          | 1484.50            | 2588.72            | 2.170                          | 1308.37            | 2838.89            |
| A_68_P20739612 | chr1:157589907-157589951                          | NM_010712:-771     | Lhx4       | PROMOTER               | 1.244                                                        | 2.251                          | 1070.22            | 2408.98            | 2.801                          | 998.26             | 2795.74            |
| A_68_P29725076 | chr14:75347080-75347124                           | NM_001033439:582   | Lrch1      | INSIDE                 | 1.244                                                        | 5.256                          | 911.20             | 4789.64            | 6.541                          | 752.47             | 4922.20            |
| A_68_P32266420 | chrX:13063059-13063103                            | NM_173415:18283    | Nyx        | INSIDE                 | 1.244                                                        | 1.668                          | 1069.58            | 1784.24            | 2.076                          | 619.59             | 1286.00            |
| A_68_P31655270 | chr18:42554978-42555022                           | NM_138945:750      | Pou4f3     | INSIDE                 | 1.244                                                        | 0.483                          | 1446.10            | 698.58             | 0.601                          | 1248.73            | 750.64             |
| A_68_P31735662 | chr18:57522846-57522891                           | NM_028447:8482     | Prrc1      | INSIDE                 | 1.244                                                        | 3.999                          | 2807.67            | 11228.79           | 4.976                          | 1990.29            | 9904.65            |
| A_68_P29518735 | chr14:33411263-33411307                           | NM_001001796:-1828 | Prrxl1     | PROMOTER               | 1.244                                                        | 2.059                          | 2013.62            | 4146.23            | 2.562                          | 1813.30            | 4645.67            |
| A_68_P30375546 | chr15:80808340-80808384                           | NM_134091:168      | Sgsm3      | INSIDE                 | 1.244                                                        | 2.090                          | 1155.13            | 2414.38            | 2.599                          | 1148.50            | 2985.52            |
| A_68_P24009033 | chr5:115777444-115777488                          | NM_025573:281      | Srsf9      | INSIDE                 | 1.244                                                        | 0.487                          | 1268.23            | 617.57             | 0.606                          | 974.10             | 589.95             |
| A_68_P20880193 | chr1:183141557-183141601                          | NM_145514:531      | Wdr26      | INSIDE                 | 1.244                                                        | 3.488                          | 599.71             | 2091.94            | 4.339                          | 550.61             | 2389.35            |
| A_68_P30571778 | chr16:17070255-17070299                           | NM_023249:-127     | Ypel1      | PROMOTER               | 1.244                                                        | 2.528                          | 5306.44            | 13416.66           | 3.145                          | 3892.40            | 12240.73           |
| A_68_P24098211 | chr5:131915292-131915336                          | NM_177047:1102899  | Aut2       | INSIDE                 | 1.243                                                        | 2.259                          | 711.67             | 1607.87            | 2.809                          | 697.07             | 1957.96            |
| A_68_P31092908 | chr17:23803677-23803721                           | NM_153784:6209     | Ccdc64b    | INSIDE                 | 1.243                                                        | 2.159                          | 309.19             | 667.51             | 2.683                          | 266.22             | 714.13             |
| A_68_P29957984 | chr14:122197004-122197048                         | NM_134074:-70      | Dock9      | PROMOTER               | 1.243                                                        | 2.182                          | 628.20             | 1370.81            | 2.712                          | 531.98             | 1442.63            |
| A_68_P23363269 | chr4:140864959-140865003                          | NM_010139:7826     | Epha2      | INSIDE                 | 1.243                                                        | 4.222                          | 3321.64            | 14025.22           | 5.249                          | 2268.17            | 11906.38           |
| A_68_P21315048 | chr2:70499769-70499813                            | NM_027352:225      | Gorasp2    | INSIDE                 | 1.243                                                        | 5.489                          | 1053.46            | 5782.87            | 6.822                          | 936.99             | 6391.96            |
| A_68_P27210043 | chr10:66590012-66590056                           | NM_207221:29       | Jmjd1c     | INSIDE                 | 1.243                                                        | 1.880                          | 720.26             | 1353.78            | 2.337                          | 648.50             | 1515.27            |
| A_68_P28744817 | chr12:112812887-112812931                         | NM_021516:188      | Mark3      | INSIDE                 | 1.243                                                        | 2.508                          | 904.56             | 2268.92            | 3.119                          | 748.34             | 2333.79            |
| A_68_P27281296 | chr10:79612763-79612807                           | NM_021565:1750     | Midn       | INSIDE                 | 1.243                                                        | 3.371                          | 2199.07            | 7414.03            | 4.191                          | 1821.78            | 7635.18            |
| A_68_P25025268 | chr7:29871232-29871276                            | NR_035489:-2541    | Mir1963    | PROMOTER               | 1.243                                                        | 2.310                          | 386.85             | 893.59             | 2.871                          | 287.15             | 824.27             |
| A_68_P28055691 | chr11:98188926-98188970                           | NM_010895:2011     | Neurod2    | INSIDE                 | 1.243                                                        | 1.630                          | 673.71             | 1098.28            | 2.027                          | 617.22             | 1250.96            |
| A_68_P22509731 | chr3:127336864-127336908                          | NM_009718:824      | Neurog2    | INSIDE                 | 1.243                                                        | 1.829                          | 1273.66            | 2329.76            | 2.274                          | 1064.78            | 2421.49            |
| A_68_P23792520 | chr5:72950217-72950261                            | NM_133921:646      | Nfx1l      | INSIDE                 | 1.243                                                        | 1.775                          | 1114.16            | 1977.16            | 2.206                          | 1059.70            | 2337.52            |
| A_68_P22946060 | chr4:57580871-57580915                            | NM_172868:-227     | Paln2      | PROMOTER               | 1.243                                                        | 1.953                          | 2016.46            | 3937.84            | 2.428                          | 1923.99            | 4672.15            |
| A_68_P22031102 | chr3:30868233-30868277                            | NM_001165954:83    | Phc3       | INSIDE                 | 1.243                                                        | 1.598                          | 2356.87            | 3767.43            | 1.987                          | 1957.54            | 3889.76            |
| A_68_P21351534 | chr2:76485547-76485591                            | NM_011871:483      | Prkra      | INSIDE                 | 1.243                                                        | 1.991                          | 753.34             | 1500.29            | 2.476                          | 620.54             | 1536.70            |
| A_68_P26826272 | chr9:110760480-110760524                          | NM_146227:32       | Prss50     | INSIDE                 | 1.243                                                        | 1.802                          | 1509.79            | 2720.03            | 2.239                          | 1273.09            | 2850.40            |
| A_68_P30213989 | chr15:51823378-51823422                           | NM_009009:-94      | Rad21      | PROMOTER               | 1.243                                                        | 2.424                          | 512.24             | 1241.62            | 3.012                          | 568.55             | 1712.35            |

| ProbeName      | Target position of probe on CpG island microarray | TargetID                  | GeneSymbol    | CpG island Description | Ratio of relative methylation (TiO <sub>2</sub> -NP/Vehicle) | Sham group                     |                    |                    | TiO <sub>2</sub> -H group      |                    |                    |
|----------------|---------------------------------------------------|---------------------------|---------------|------------------------|--------------------------------------------------------------|--------------------------------|--------------------|--------------------|--------------------------------|--------------------|--------------------|
|                |                                                   |                           |               |                        |                                                              | Relative methylation (Cy5/Cy3) | Cy3 signal (Input) | Cy5 signal (MeDIP) | Relative methylation (Cy5/Cy3) | Cy3 signal (Input) | Cy5 signal (MeDIP) |
| A_68_P27695163 | chr11:33413461-33413505                           | NM_023146:264             | Ranbp17       | INSIDE                 | 1.243                                                        | 1.689                          | 724.83             | 1224.46            | 2.100                          | 720.91             | 1514.26            |
| A_68_P26240713 | chr8:126177658-126177702                          | NM_133955:-148            | Rhou          | PROMOTER               | 1.243                                                        | 1.957                          | 2592.72            | 5073.24            | 2.432                          | 2129.31            | 5178.14            |
| A_68_P30489267 | chr15:100876705-100876749                         | NM_011323:110025          | Scn8a         | DOWNSTREAM             | 1.243                                                        | 1.454                          | 952.86             | 1385.49            | 1.808                          | 754.50             | 1363.75            |
| A_68_P22829976 | chr4:34136877-34136921                            | NM_026293:144             | Spaca1        | INSIDE                 | 1.243                                                        | 2.106                          | 273.16             | 575.34             | 2.617                          | 269.97             | 706.62             |
| A_68_P23325212 | chr4:134408532-134408576                          | NM_025382:706             | Tmem57        | INSIDE                 | 1.243                                                        | 1.885                          | 1913.71            | 3606.48            | 2.343                          | 1637.27            | 3836.66            |
| A_68_P29478600 | chr14:26427576-26427620                           | NM_183208:148928          | Zmiz1         | INSIDE                 | 1.243                                                        | 1.722                          | 442.38             | 761.73             | 2.140                          | 380.10             | 813.50             |
| A_68_P20625946 | chr1:135060523-135060567                          |                           |               | Unknown                | 1.243                                                        | 4.473                          | 841.22             | 3762.62            | 5.561                          | 676.78             | 3763.47            |
| A_68_P25591880 | chr7:149136294-149136338                          | NM_001009929:326          | Brsk2         | INSIDE                 | 1.242                                                        | 5.492                          | 589.54             | 3237.99            | 6.822                          | 507.97             | 3465.37            |
| A_68_P24980672 | chr7:16871856-16871900                            | NM_172297:-1870           | Ccdc9         | PROMOTER               | 1.242                                                        | 2.206                          | 5364.89            | 11837.58           | 2.740                          | 3756.48            | 10293.89           |
| A_68_P24052807 | chr5:123349777-123349821                          | NM_013910:561             | Kdm2b         | INSIDE                 | 1.242                                                        | 3.035                          | 237.11             | 719.64             | 3.768                          | 237.92             | 896.55             |
| A_68_P22601418 | chr3:143865112-143865156                          | NM_001161770:162          | Lmo4          | INSIDE                 | 1.242                                                        | 1.792                          | 3344.93            | 5992.95            | 2.226                          | 2452.77            | 5459.35            |
| A_68_P27931782 | chr11:76212095-76212139                           | NM_008750:527             | Nxn           | INSIDE                 | 1.242                                                        | 1.396                          | 2403.92            | 3356.63            | 1.734                          | 2185.04            | 3789.94            |
| A_68_P31958230 | chr19:11943487-11943531                           | NM_001011775:2196         | Olfrl1419     | DOWNSTREAM             | 1.242                                                        | 2.053                          | 903.37             | 1854.28            | 2.550                          | 799.94             | 2039.68            |
| A_68_P26587151 | chr9:65194360-65194404                            | NM_016688:508             | Pdcd7         | INSIDE                 | 1.242                                                        | 4.360                          | 439.00             | 1914.24            | 5.417                          | 406.00             | 2199.31            |
| A_68_P24206536 | chr6:4697665-4697715                              | NM_001040611:385          | Peg10         | INSIDE                 | 1.242                                                        | 1.805                          | 383.28             | 691.98             | 2.242                          | 450.16             | 1009.31            |
| A_68_P24949867 | chr7:4610509-4610553                              | NM_172894:22              | Ppp6r1        | INSIDE                 | 1.242                                                        | 1.439                          | 2039.58            | 2935.55            | 1.788                          | 1631.68            | 2917.31            |
| A_68_P29605620 | chr14:52877501-52877545                           | NM_172601:21548           | Rab2b         | DOWNSTREAM             | 1.242                                                        | 2.516                          | 539.52             | 1357.42            | 3.125                          | 467.97             | 1462.18            |
| A_68_P27054670 | chr10:33739429-33739473                           | NM_025614:-28             | Rwd1          | PROMOTER               | 1.242                                                        | 1.898                          | 692.21             | 1314.01            | 2.358                          | 694.41             | 1637.11            |
| A_68_P30463773 | chr15:96291502-96291546                           | NM_028148:-250            | Scafl1        | PROMOTER               | 1.242                                                        | 1.863                          | 1099.28            | 2047.92            | 2.314                          | 971.70             | 2248.83            |
| A_68_P32144298 | chr19:46575400-46575444                           | NM_053100:-715            | Trim8         | PROMOTER               | 1.242                                                        | 3.957                          | 1474.95            | 5836.50            | 4.916                          | 1317.92            | 6478.51            |
| A_68_P30665016 | chr16:34573818-34573862                           | ENSMUST00000114961:-222   |               | PROMOTER               | 1.242                                                        | 1.649                          | 616.46             | 1016.40            | 2.048                          | 500.75             | 1025.41            |
| A_68_P32237967 | chrX:6895968-6896012                              | ENSMUST00000132126:306    |               | INSIDE                 | 1.242                                                        | 2.576                          | 431.86             | 1112.67            | 3.199                          | 303.68             | 971.44             |
| A_68_P24686642 | chr6:99471242-99471286                            | ENSMUST00000155466:145527 |               | INSIDE                 | 1.242                                                        | 2.325                          | 566.03             | 1315.96            | 2.888                          | 436.63             | 1260.97            |
| A_68_P28612730 | chr12:88224807-88224851                           | NM_145836:936             | 6430527G18Rik | INSIDE                 | 1.241                                                        | 1.521                          | 1897.55            | 2886.17            | 1.887                          | 1505.53            | 2841.36            |
| A_68_P27282652 | chr10:79811999-79812043                           | NM_001113548:-829         | Adams15       | DIVERGENT_PROMOTER     | 1.241                                                        | 2.558                          | 1695.30            | 4335.84            | 3.175                          | 1465.16            | 4651.50            |
| A_68_P30281416 | chr15:64214267-64214311                           | NM_010026:193             | Asap1         | INSIDE                 | 1.241                                                        | 2.017                          | 1051.04            | 2120.28            | 2.503                          | 1004.74            | 2515.13            |
| A_68_P25503172 | chr7:134093232-134093276                          | NM_001039645:-159         | Asphd1        | DIVERGENT_PROMOTER     | 1.241                                                        | 1.574                          | 3098.78            | 4876.18            | 1.953                          | 2367.27            | 4623.35            |
| A_68_P25371475 | chr7:108256912-108256956                          | NM_001146010:-354         | Fchs2         | PROMOTER               | 1.241                                                        | 2.611                          | 1581.60            | 4129.11            | 3.239                          | 1347.12            | 4362.84            |
| A_68_P24501238 | chr6:63207151-63207195                            | NM_008167:322             | Grid2         | INSIDE                 | 1.241                                                        | 1.559                          | 899.11             | 1401.34            | 1.934                          | 817.59             | 1580.99            |
| A_68_P20897050 | chr1:186542380-186542424                          | NM_008250:13970           | Hlx           | DOWNSTREAM             | 1.241                                                        | 2.146                          | 1253.58            | 2690.62            | 2.664                          | 1034.80            | 2757.03            |
| A_68_P20864309 | chr1:180460129-180460173                          | NM_001161665:895          | Kif26b        | INSIDE                 | 1.241                                                        | 1.727                          | 437.24             | 755.19             | 2.143                          | 415.39             | 890.07             |
| A_68_P21615602 | chr2:127614486-127614530                          | NM_016902:82              | Nphp1         | INSIDE                 | 1.241                                                        | 1.532                          | 1048.58            | 1606.01            | 1.901                          | 976.74             | 1856.37            |
| A_68_P22325404 | chr3:90269294-90269338                            | NM_008727:472             | Npr1          | INSIDE                 | 1.241                                                        | 2.781                          | 1212.93            | 3373.39            | 3.453                          | 1057.74            | 3652.19            |
| A_68_P28397148 | chr12:45370156-45370200                           | NM_026164:38              | Pnpla8        | INSIDE                 | 1.241                                                        | 1.617                          | 1845.78            | 2984.75            | 2.007                          | 1449.14            | 2908.38            |
| A_68_P24152257 | chr5:143026729-143026773                          | NM_178702:281             | Radil         | INSIDE                 | 1.241                                                        | 2.493                          | 1926.80            | 4803.14            | 3.093                          | 1706.90            | 5279.37            |
| A_68_P23618265 | chr5:38611458-38611503                            | NM_029162:187             | Zbtb49        | INSIDE                 | 1.241                                                        | 1.465                          | 1245.44            | 1824.82            | 1.818                          | 1165.60            | 2119.63            |
| A_68_P23588821 | chr5:33773068-33773112                            | ENSMUST0000030994:754     |               | DOWNSTREAM             | 1.241                                                        | 1.561                          | 1828.78            | 2855.12            | 1.938                          | 1536.19            | 2977.50            |
| A_68_P27339936 | chr10:90545573-90545617                           | NM_001042558:-106         | Apaf1         | DIVERGENT_PROMOTER     | 1.240                                                        | 2.561                          | 670.67             | 1717.48            | 3.176                          | 634.13             | 2013.89            |
| A_68_P32233091 | chrX:5660358-5660402                              | NM_001033211:158          | AU022751      | INSIDE                 | 1.240                                                        | 2.810                          | 373.95             | 1050.64            | 3.484                          | 219.06             | 763.29             |
| A_68_P21324623 | chr2:72124103-72124147                            | NM_178084:367             | B230120H23Rik | INSIDE                 | 1.240                                                        | 1.622                          | 433.08             | 702.37             | 2.011                          | 419.95             | 844.59             |
| A_68_P28183231 | chr11:120096349-120096393                         | NM_198423:2110            | Bahcc1        | INSIDE                 | 1.240                                                        | 1.576                          | 463.59             | 730.80             | 1.954                          | 443.92             | 867.52             |
| A_68_P23260770 | chr4:122782660-122782704                          | NM_007559:275             | Bmp8b         | INSIDE                 | 1.240                                                        | 1.667                          | 1952.32            | 3254.69            | 2.067                          | 1560.75            | 3225.52            |
| A_68_P29289426 | chr13:105018966-105019010                         | NM_181061:-46             | Cenpk         | DIVERGENT_PROMOTER     | 1.240                                                        | 2.914                          | 265.54             | 773.76             | 3.613                          | 266.41             | 962.60             |
| A_68_P23609093 | chr5:37087355-37087399                            | NM_001081232:-168         | D5Erd579c     | PROMOTER               | 1.240                                                        | 4.486                          | 2650.67            | 11889.93           | 5.561                          | 2185.60            | 12154.40           |
| A_68_P28525540 | chr12:72419394-72419438                           | NM_001190466:8546         | Dact1         | INSIDE                 | 1.240                                                        | 2.243                          | 909.41             | 2040.06            | 2.781                          | 713.15             | 1983.48            |
| A_68_P28705232 | chr12:105990506-105990550                         | NM_148948:-366            | Dicer1        | PROMOTER               | 1.240                                                        | 1.712                          | 1413.42            | 2420.17            | 2.123                          | 1292.42            | 2744.31            |
| A_68_P31694858 | chr18:49992481-49992525                           | NM_001081371:-164         | Dmxi1         | PROMOTER               | 1.240                                                        | 4.242                          | 273.20             | 1158.83            | 5.261                          | 260.32             | 1369.40            |
| A_68_P21052793 | chr2:20891228-20891272                            | NR_033225:750             | Gm13375       | INSIDE                 | 1.240                                                        | 1.514                          | 1545.28            | 2339.43            | 1.878                          | 1297.01            | 2435.35            |
| A_68_P26220843 | chr8:123060419-123060463                          | NM_001145896:-868         | Gse1          | PROMOTER               | 1.240                                                        | 2.353                          | 2561.25            | 6026.72            | 2.918                          | 2050.43            | 5983.03            |
| A_68_P28452663 | chr12:56701421-56701465                           | NM_020287:1539            | Insm2         | INSIDE                 | 1.240                                                        | 1.746                          | 2136.04            | 3729.95            | 2.166                          | 1950.16            | 4223.07            |
| A_68_P20925497 | chr1:191167558-191167602                          | NM_001159850:-348         | Kenk2         | PROMOTER               | 1.240                                                        | 1.742                          | 1493.38            | 2602.05            | 2.160                          | 1321.58            | 2854.22            |

| ProbeName      | Target position of probe on CpG island microarray | TargetID            | GeneSymbol    | CpG island Description | Ratio of relative methylation (TiO <sub>2</sub> -NP/Vehicle) | Sham group                     |                    |                    | TiO <sub>2</sub> -H group      |                    |                    |
|----------------|---------------------------------------------------|---------------------|---------------|------------------------|--------------------------------------------------------------|--------------------------------|--------------------|--------------------|--------------------------------|--------------------|--------------------|
|                |                                                   |                     |               |                        |                                                              | Relative methylation (Cy5/Cy3) | Cy3 signal (Input) | Cy5 signal (MeDIP) | Relative methylation (Cy5/Cy3) | Cy3 signal (Input) | Cy5 signal (MeDIP) |
| A_68_P26537382 | chr9:56483766-56483810                            | NM_181074:49272     | Lingo1        | INSIDE                 | 1.240                                                        | 3.194                          | 3619.85            | 11560.74           | 3.960                          | 3342.47            | 13236.53           |
| A_68_P24796449 | chr6:119987179-119987223                          | NR_030487:-2871     | Mir706        | PROMOTER               | 1.240                                                        | 2.561                          | 1001.63            | 2564.95            | 3.175                          | 901.57             | 2862.28            |
| A_68_P27222783 | chr10:68732909-68732953                           | NM_001081347:57526  | Rhobtb1       | INSIDE                 | 1.240                                                        | 1.956                          | 1458.67            | 2853.35            | 2.426                          | 1110.64            | 2694.65            |
| A_68_P31383398 | chr17:80879916-80879960                           | NM_009231:-145      | Sos1          | PROMOTER               | 1.240                                                        | 1.703                          | 1343.08            | 2287.37            | 2.111                          | 1149.16            | 2425.95            |
| A_68_P27915637 | chr11:72990334-72990378                           | NM_001168470:154    | Tmem93        | INSIDE                 | 1.240                                                        | 2.253                          | 981.87             | 2211.77            | 2.793                          | 842.99             | 2354.21            |
| A_68_P20023923 | chr11:9738247-9738291                             | NM_173443:195       | Vcpip1        | INSIDE                 | 1.240                                                        | 0.494                          | 1117.23            | 551.58             | 0.612                          | 914.46             | 559.92             |
| A_68_P27287685 | chr10:80606918-80606962                           | NM_010731:7925      | Zbtb7a        | INSIDE                 | 1.240                                                        | 2.668                          | 269.30             | 718.38             | 3.308                          | 250.24             | 827.84             |
| A_68_P26199435 | chr8:119387454-119387498                          |                     | Unknown       | Unknown                | 1.240                                                        | 1.721                          | 748.78             | 1288.47            | 2.133                          | 648.06             | 1382.53            |
| A_68_P23542162 | chr5:23991041-23991085                            | NM_139153:33068     | Agap3         | INSIDE                 | 1.239                                                        | 1.481                          | 1333.93            | 1975.65            | 1.836                          | 1228.96            | 2255.86            |
| A_68_P28025136 | chr11:92960730-92960774                           | NM_028296:149       | Car10         | INSIDE                 | 1.239                                                        | 1.670                          | 1646.14            | 2749.64            | 2.069                          | 1290.25            | 2669.70            |
| A_68_P22340619 | chr3:94583028-94583072                            | NM_001037711:7387   | Cgn           | INSIDE                 | 1.239                                                        | 3.622                          | 428.70             | 1552.64            | 4.489                          | 360.99             | 1620.52            |
| A_68_P28150128 | chr11:114713294-114713338                         | NM_147217:-27       | Gprc5c        | PROMOTER               | 1.239                                                        | 1.601                          | 3772.47            | 6039.25            | 1.984                          | 2980.61            | 5912.21            |
| A_68_P29059426 | chr13:56236410-56236454                           | NM_001159513:479    | H2afy         | INSIDE                 | 1.239                                                        | 1.965                          | 697.29             | 1370.08            | 2.434                          | 566.58             | 1378.97            |
| A_68_P26142251 | chr8:109460182-109460226                          | NM_009229:555       | Sntb2         | INSIDE                 | 1.239                                                        | 1.946                          | 3526.37            | 6863.93            | 2.411                          | 2992.61            | 7214.83            |
| A_68_P24951724 | chr7:4989811-4989856                              | NM_001039532:215    | Zfp784        | INSIDE                 | 1.239                                                        | 1.886                          | 8734.42            | 16475.17           | 2.336                          | 6341.85            | 14817.50           |
| A_68_P29056514 | chr13:55794315-55794359                           | NM_181278:-148      | B230219D22Rik | PROMOTER               | 1.238                                                        | 2.236                          | 890.15             | 1990.52            | 2.767                          | 799.64             | 2212.84            |
| A_68_P27258520 | chr10:75226966-75227010                           | NM_172549:114       | Cabin1        | INSIDE                 | 1.238                                                        | 0.516                          | 1214.82            | 627.29             | 0.639                          | 973.45             | 622.34             |
| A_68_P31834477 | chr18:75178883-75178927                           | NM_027727:479       | Dym           | INSIDE                 | 1.238                                                        | 4.146                          | 1322.65            | 5483.98            | 5.131                          | 1121.13            | 5752.82            |
| A_68_P29928905 | chr14:117325692-117325736                         | NM_001079844:1178   | Gpc6          | INSIDE                 | 1.238                                                        | 2.202                          | 269.73             | 593.81             | 2.726                          | 255.58             | 696.83             |
| A_68_P20877961 | chr11:182743984-182744028                         | NM_008210:-272      | H3f3a         | PROMOTER               | 1.238                                                        | 2.192                          | 1350.01            | 2958.78            | 2.714                          | 1176.66            | 3193.29            |
| A_68_P29097470 | chr13:64263694-64263738                           | NM_019986:543       | Habp4         | INSIDE                 | 1.238                                                        | 0.435                          | 1755.82            | 764.58             | 0.539                          | 1625.97            | 876.25             |
| A_68_P23540977 | chr5:23830831-23830875                            | NM_013569:26570     | Kenh2         | INSIDE                 | 1.238                                                        | 1.856                          | 726.25             | 1347.81            | 2.298                          | 508.36             | 1168.28            |
| A_68_P20620520 | chr11:134195429-134195473                         | NM_144810:248       | Klhdc8a       | INSIDE                 | 1.238                                                        | 1.485                          | 630.48             | 936.52             | 1.839                          | 596.56             | 1096.87            |
| A_68_P31600354 | chr18:32098983-32099027                           | NM_144862:7844      | Lims2         | INSIDE                 | 1.238                                                        | 3.081                          | 745.99             | 2298.21            | 3.813                          | 623.46             | 2377.42            |
| A_68_P30004455 | chr15:9070632-9070676                             | NM_177178:329       | Lmbrd2        | INSIDE                 | 1.238                                                        | 1.985                          | 935.03             | 1855.86            | 2.457                          | 836.88             | 2056.07            |
| A_68_P23134366 | chr4:97445300-97445344                            | NM_001122953:1006   | Nfia          | INSIDE                 | 1.238                                                        | 2.670                          | 535.17             | 1429.03            | 3.307                          | 462.23             | 1528.55            |
| A_68_P21565421 | chr2:118502775-118502819                          | NM_001145854:-185   | Pak6          | PROMOTER               | 1.238                                                        | 1.450                          | 3479.05            | 5043.21            | 1.795                          | 2846.84            | 5110.26            |
| A_68_P31023590 | chr7:7182740-7182784                              | NM_026611:-446      | Rnaset2b      | PROMOTER               | 1.238                                                        | 7.390                          | 18851.93           | 139315.30          | 9.147                          | 12639.12           | 115612.90          |
| A_68_P30671369 | chr16:35651290-35651334                           | NM_013661:109865    | Sema5b        | INSIDE                 | 1.238                                                        | 2.393                          | 399.51             | 956.14             | 2.963                          | 374.12             | 1108.49            |
| A_68_P32149065 | chr19:47388402-47388446                           | NM_001164717:150477 | Sh3pxd2a      | INSIDE                 | 1.238                                                        | 2.786                          | 576.32             | 1605.88            | 3.451                          | 449.39             | 1550.75            |
| A_68_P27851930 | chr11:61890326-61890370                           | NM_001029936:-250   | Specc1        | PROMOTER               | 1.238                                                        | 1.892                          | 6923.25            | 13101.79           | 2.342                          | 5444.28            | 12750.40           |
| A_68_P32136814 | chr19:45230529-45230573                           | NM_021901:5346      | Tlx1          | INSIDE                 | 1.238                                                        | 0.447                          | 1308.50            | 585.31             | 0.554                          | 1010.63            | 559.58             |
| A_68_P26292116 | chr9:8544357-8544401                              | NM_013838:237       | Trpc6         | INSIDE                 | 1.238                                                        | 2.452                          | 394.17             | 966.68             | 3.036                          | 400.80             | 1216.79            |
| A_68_P25715449 | chr8:24318844-24318888                            | NM_018743:59        | Agpat6        | INSIDE                 | 1.237                                                        | 1.793                          | 699.64             | 1254.42            | 2.218                          | 634.63             | 1407.82            |
| A_68_P29675826 | chr14:66456589-66456633                           | NM_145944:472       | Ccdc25        | INSIDE                 | 1.237                                                        | 1.602                          | 921.96             | 1477.40            | 1.983                          | 914.05             | 1812.27            |
| A_68_P28177060 | chr11:119161422-119161466                         | NM_138669:-87       | Eif4a3        | PROMOTER               | 1.237                                                        | 1.870                          | 1394.98            | 2609.17            | 2.313                          | 1155.28            | 2672.57            |
| A_68_P23973616 | chr5:109124200-109124244                          | NM_001164259:975    | Fgfr1         | INSIDE                 | 1.237                                                        | 1.930                          | 4703.58            | 9079.96            | 2.388                          | 3704.93            | 8846.37            |
| A_68_P21338950 | chr2:74542960-74543004                            | NM_008276:-563      | Hoxd8         | PROMOTER               | 1.237                                                        | 3.289                          | 792.64             | 2606.66            | 4.067                          | 771.79             | 3139.04            |
| A_68_P21103437 | chr2:30328220-30328264                            | NM_030244:1477      | Ier5l         | INSIDE                 | 1.237                                                        | 1.783                          | 969.41             | 1728.04            | 2.206                          | 873.63             | 1926.91            |
| A_68_P26348964 | chr9:21603129-21603173                            | NM_145611:-160      | Kank2         | PROMOTER               | 1.237                                                        | 2.092                          | 1105.14            | 2311.91            | 2.588                          | 917.52             | 2374.59            |
| A_68_P25022020 | chr7:29244408-29244453                            | NM_001141921:7174   | Lrfn1         | INSIDE                 | 1.237                                                        | 2.756                          | 999.80             | 2755.87            | 3.410                          | 851.80             | 2904.46            |
| A_68_P29226007 | chr13:93614754-93614798                           | NM_001162945:35     | Mtx3          | INSIDE                 | 1.237                                                        | 5.397                          | 1440.29            | 7772.75            | 6.675                          | 1232.82            | 8229.37            |
| A_68_P30458581 | chr15:95359007-95359051                           | NM_016743:109       | Nell2         | INSIDE                 | 1.237                                                        | 0.414                          | 1492.61            | 618.14             | 0.512                          | 1266.69            | 648.80             |
| A_68_P25370976 | chr7:108160468-108160512                          | NM_008773:15        | P2ry2         | INSIDE                 | 1.237                                                        | 4.261                          | 1849.73            | 7881.62            | 5.271                          | 1535.93            | 8095.53            |
| A_68_P30423565 | chr15:88991328-88991372                           | NM_001159521:12930  | Plxbn2        | INSIDE                 | 1.237                                                        | 2.121                          | 368.90             | 782.47             | 2.624                          | 282.04             | 739.96             |
| A_68_P20740069 | chr11:157660136-157660180                         | NM_001024945:-129   | Qsox1         | PROMOTER               | 1.237                                                        | 1.817                          | 479.57             | 871.24             | 2.247                          | 523.68             | 1176.62            |
| A_68_P28956973 | chr13:37949256-37949300                           | NM_001039188:30017  | Rreb1         | INSIDE                 | 1.237                                                        | 1.816                          | 446.55             | 811.04             | 2.248                          | 426.08             | 957.66             |
| A_68_P28830403 | chr13:12198675-12198719                           | NM_023868:516       | Ryr2          | INSIDE                 | 1.237                                                        | 2.275                          | 854.64             | 1944.66            | 2.815                          | 839.04             | 2362.14            |
| A_68_P20945911 | chr1:194681059-194681103                          | NM_001177794:-3139  | Sertad4       | PROMOTER               | 1.237                                                        | 2.947                          | 1351.92            | 3984.15            | 3.645                          | 1205.19            | 4392.81            |
| A_68_P26710064 | chr9:88333383-88333427                            | NM_172926:385       | Snx14         | INSIDE                 | 1.237                                                        | 2.074                          | 1749.58            | 3628.84            | 2.566                          | 1420.74            | 3645.36            |
| A_68_P26626138 | chr9:71959964-71960008                            | NM_011544:-360      | Tcf12         | PROMOTER               | 1.237                                                        | 2.531                          | 2042.50            | 5168.92            | 3.132                          | 1681.02            | 5264.45            |

| ProbeName      | Target position of probe on CpG island microarray | TargetID                | GeneSymbol    | CpG island Description | Ratio of relative methylation (TiO <sub>2</sub> -NP/Vehicle) | Sham group                     |                    |                    | TiO <sub>2</sub> -H group      |                    |                    |
|----------------|---------------------------------------------------|-------------------------|---------------|------------------------|--------------------------------------------------------------|--------------------------------|--------------------|--------------------|--------------------------------|--------------------|--------------------|
|                |                                                   |                         |               |                        |                                                              | Relative methylation (Cy5/Cy3) | Cy3 signal (Input) | Cy5 signal (MeDIP) | Relative methylation (Cy5/Cy3) | Cy3 signal (Input) | Cy5 signal (MeDIP) |
| A_68_P26544600 | A_68_P26544600                                    |                         |               | Unknown                | 1.237                                                        | 3.490                          | 1101.16            | 3843.33            | 4.316                          | 987.12             | 4260.49            |
| A_68_P31215274 | chr17:48112426-48112470                           |                         |               | Unknown                | 1.237                                                        | 1.731                          | 789.53             | 1366.32            | 2.141                          | 690.46             | 1478.42            |
| A_68_P32670206 | chrX:130593674-130593718                          | NM_133196:-191          | Cstf2         | PROMOTER               | 1.236                                                        | 2.152                          | 871.71             | 1875.76            | 2.660                          | 632.77             | 1683.00            |
| A_68_P24449035 | chr6:52153690-52153734                            | NM_010453:874           | Hoxa5         | INSIDE                 | 1.236                                                        | 1.981                          | 1294.73            | 2564.25            | 2.449                          | 1072.42            | 2625.86            |
| A_68_P28043567 | chr11:96160575-96160619                           | NM_008269:112           | Hoxb6         | INSIDE                 | 1.236                                                        | 1.992                          | 1521.36            | 3030.19            | 2.463                          | 1248.37            | 3074.14            |
| A_68_P26640632 | chr9:74711201-74711245                            | NM_008262:1495          | Onecut1       | INSIDE                 | 1.236                                                        | 2.985                          | 3357.89            | 10022.92           | 3.690                          | 2778.40            | 10253.04           |
| A_68_P20241610 | chr1:55463210-55463254                            | NM_00114663:443         | Plel1         | INSIDE                 | 1.236                                                        | 1.632                          | 915.80             | 1494.27            | 2.016                          | 850.74             | 1715.41            |
| A_68_P31600225 | chr18:32070729-32070773                           | NM_026006:807           | Sfr2d3        | INSIDE                 | 1.236                                                        | 1.597                          | 914.21             | 1460.16            | 1.973                          | 872.48             | 1721.73            |
| A_68_P27966237 | chr11:82248208-82248252                           | NM_023438:45829         | Tmem132e      | INSIDE                 | 1.236                                                        | 3.714                          | 1503.42            | 5583.86            | 4.591                          | 1268.33            | 5822.68            |
| A_68_P28261138 | chr12:15822842-15822886                           | NM_144551:727           | Trib2         | INSIDE                 | 1.236                                                        | 3.276                          | 625.97             | 2050.90            | 4.049                          | 686.49             | 2779.48            |
| A_68_P27910151 | chr11:72020571-72020617                           | NM_026559:-461          | Txncd17       | DIVERGENT_PROMOTER     | 1.236                                                        | 1.705                          | 607.46             | 1035.89            | 2.108                          | 526.85             | 1110.75            |
| A_68_P26948225 | chr10:12642644-12642688                           | NR_038027:259           | B230208H11Rik | INSIDE                 | 1.235                                                        | 1.796                          | 495.93             | 890.72             | 2.219                          | 441.49             | 979.68             |
| A_68_P28153095 | chr11:115228977-115229021                         | NM_175454:35            | C630004H02Rik | INSIDE                 | 1.235                                                        | 3.505                          | 877.03             | 3073.74            | 4.329                          | 1029.77            | 4457.52            |
| A_68_P28170165 | chr11:118110109-118110153                         | NM_00112699:-224        | Cyth1         | PROMOTER               | 1.235                                                        | 2.764                          | 1221.01            | 3375.34            | 3.413                          | 997.16             | 3403.27            |
| A_68_P30590962 | chr16:21204783-21204827                           | NM_010143:-63           | Ephb3         | PROMOTER               | 1.235                                                        | 3.268                          | 710.78             | 2322.96            | 4.035                          | 565.11             | 2280.23            |
| A_68_P29996508 | chr15:7763780-7763824                             | NM_010275:2792          | Gdnf          | INSIDE                 | 1.235                                                        | 1.708                          | 684.74             | 1169.37            | 2.108                          | 599.98             | 1265.04            |
| A_68_P32767190 | chrX:154036239-154036283                          | NM_172307:387           | Mbtps2        | INSIDE                 | 1.235                                                        | 1.745                          | 631.98             | 1102.73            | 2.155                          | 329.06             | 709.18             |
| A_68_P28052184 | chr11:97561645-97561689                           | NM_001163308:-704       | Pegf2         | PROMOTER               | 1.235                                                        | 1.718                          | 1571.01            | 2698.74            | 2.122                          | 1284.56            | 2726.03            |
| A_68_P28055914 | chr11:98219976-98220020                           | NM_021547:301           | Stard3        | INSIDE                 | 1.235                                                        | 1.966                          | 797.08             | 1566.71            | 2.428                          | 635.47             | 1542.91            |
| A_68_P23317937 | chr4:133054043-133054087                          | NM_001081156:401        | Trmp1         | INSIDE                 | 1.235                                                        | 3.366                          | 947.42             | 3188.70            | 4.157                          | 842.58             | 3502.95            |
| A_68_P24874652 | chr6:136776509-136776553                          | NM_021714:207           | Wbp11         | INSIDE                 | 1.235                                                        | 1.527                          | 3699.15            | 5646.81            | 1.884                          | 2809.48            | 5294.46            |
| A_68_P25600929 | chr7:150624243-150624287                          |                         |               | Unknown                | 1.235                                                        | 3.584                          | 722.05             | 2587.69            | 4.426                          | 654.92             | 2898.72            |
| A_68_P21565885 | chr2:118571382-118571426                          | NR_030716:-93           | 5430417L22Rik | PROMOTER               | 1.234                                                        | 1.916                          | 1461.77            | 2800.90            | 2.364                          | 1291.48            | 3053.51            |
| A_68_P27033510 | chr10:28867430-28867474                           | NM_026138:3651          | 6330407J23Rik | INSIDE                 | 1.234                                                        | 1.641                          | 1994.17            | 3273.28            | 2.025                          | 1639.25            | 3319.61            |
| A_68_P24469556 | chr6:55402442-55402486                            | NM_001025372:491        | Adecyap1r1    | INSIDE                 | 1.234                                                        | 1.418                          | 837.79             | 1187.83            | 1.749                          | 722.95             | 1264.50            |
| A_68_P29342444 | chr13:114585071-114585115                         | NM_172595:377           | Arl15         | INSIDE                 | 1.234                                                        | 1.500                          | 3228.18            | 4840.67            | 1.850                          | 2735.40            | 5061.43            |
| A_68_P21324621 | chr2:72123755-72123799                            | NM_178084:19            | B230120H23Rik | INSIDE                 | 1.234                                                        | 1.529                          | 797.45             | 1219.18            | 1.886                          | 690.20             | 1301.67            |
| A_68_P27100735 | chr10:43231159-43231203                           | NM_199028:32235         | Bend3         | INSIDE                 | 1.234                                                        | 2.682                          | 750.18             | 2012.34            | 3.311                          | 643.42             | 2130.22            |
| A_68_P21040743 | chr2:18593952-18593996                            | NM_147778:-114          | Commd3        | PROMOTER               | 1.234                                                        | 1.603                          | 2488.35            | 3988.75            | 1.978                          | 2335.94            | 4621.12            |
| A_68_P27286404 | chr10:80392789-80392833                           | NM_008655:-25           | Gadd45b       | PROMOTER               | 1.234                                                        | 1.669                          | 2540.30            | 4238.98            | 2.059                          | 2173.09            | 4473.86            |
| A_68_P27794864 | chr11:51419555-51419599                           | NM_001048061:807        | Hnrpab        | INSIDE                 | 1.234                                                        | 1.411                          | 1693.90            | 2390.86            | 1.741                          | 1472.33            | 2563.46            |
| A_68_P20241001 | chr1:55294058-55294102                            | NM_175439:60            | Mars2         | INSIDE                 | 1.234                                                        | 1.581                          | 695.13             | 1099.14            | 1.951                          | 638.40             | 1245.25            |
| A_68_P21240022 | chr2:56969332-56969376                            | NM_013613:-1905         | Nr4a2         | PROMOTER               | 1.234                                                        | 2.574                          | 1506.44            | 3877.61            | 3.175                          | 1177.32            | 3738.28            |
| A_68_P20937889 | chr1:193221406-193221450                          | NM_144880:-508          | Ppp2r5a       | PROMOTER               | 1.234                                                        | 2.008                          | 1221.32            | 2452.48            | 2.478                          | 1000.57            | 2479.18            |
| A_68_P20793343 | chr1:167124694-167124739                          | NM_145512:-152          | Sfr2d2        | PROMOTER               | 1.234                                                        | 2.186                          | 836.65             | 1829.18            | 2.699                          | 732.23             | 1975.97            |
| A_68_P21820991 | chr2:164823054-164823098                          | NM_020333:29589         | Sle12a5       | INSIDE                 | 1.234                                                        | 1.746                          | 1633.82            | 2852.86            | 2.156                          | 1806.18            | 3893.38            |
| A_68_P32196168 | chr19:55816042-55816086                           | NM_001142918:-235       | Tcf7l2        | PROMOTER               | 1.234                                                        | 1.752                          | 1637.11            | 2867.52            | 2.161                          | 1401.68            | 3029.05            |
| A_68_P29733543 | chr14:76814437-76814481                           | NM_207652:-1169         | Tsc22d1       | PROMOTER               | 1.234                                                        | 1.886                          | 1653.09            | 3117.66            | 2.327                          | 1401.61            | 3261.57            |
| A_68_P31982218 | chr19:16855459-16855503                           | NM_173028:-63           | Vps13a        | PROMOTER               | 1.234                                                        | 3.153                          | 470.62             | 1483.96            | 3.892                          | 432.33             | 1682.66            |
| A_68_P24954137 | chr7:6083887-6083931                              | NM_001013012:23665      | Zfp787        | INSIDE                 | 1.234                                                        | 3.739                          | 3994.65            | 14935.73           | 4.614                          | 3130.49            | 14442.68           |
| A_68_P20162421 | chr1:38892803-38892847                            | ENSMUST00000147695:111  |               | INSIDE                 | 1.234                                                        | 2.999                          | 484.34             | 1452.42            | 3.700                          | 522.16             | 1931.96            |
| A_68_P23268972 | chr4:124252405-124252449                          | ENSMUST00000164308:5994 |               | INSIDE                 | 1.234                                                        | 1.647                          | 863.46             | 1421.78            | 2.033                          | 734.34             | 1492.62            |
| A_68_P25713873 | chr8:24085890-24085934                            | NM_001110783:559        | Ank1          | INSIDE                 | 1.233                                                        | 1.576                          | 1016.08            | 1601.02            | 1.943                          | 838.45             | 1629.00            |
| A_68_P21080072 | chr2:26484180-26484224                            | NM_019833:226           | Fam69b        | INSIDE                 | 1.233                                                        | 3.820                          | 381.45             | 1457.15            | 4.709                          | 331.17             | 1559.50            |
| A_68_P28043916 | chr11:96202147-96202192                           | NM_010458:-2913         | Hoxb3         | PROMOTER               | 1.233                                                        | 1.393                          | 1248.94            | 1739.30            | 1.717                          | 1151.69            | 1976.87            |
| A_68_P22080609 | chr3:40439835-40439879                            | NM_175515:168           | Intu          | INSIDE                 | 1.233                                                        | 2.460                          | 373.11             | 917.90             | 3.034                          | 356.07             | 1080.28            |
| A_68_P31100484 | chr17:25073844-25073888                           | NM_001163447:56         | Mapk8ip3      | INSIDE                 | 1.233                                                        | 1.565                          | 808.90             | 1266.33            | 1.931                          | 789.98             | 1525.30            |
| A_68_P22357697 | chr3:97817451-97817495                            | NM_010928:12            | Notch2        | INSIDE                 | 1.233                                                        | 2.887                          | 1140.75            | 3293.65            | 3.560                          | 1010.67            | 3598.29            |
| A_68_P25601377 | chr7:150688210-150688254                          | NM_009434:197           | Phlda2        | INSIDE                 | 1.233                                                        | 1.626                          | 608.67             | 989.95             | 2.006                          | 542.58             | 1088.51            |
| A_68_P31599575 | chr18:31948663-31948707                           | NM_027002:-128          | Polr2d        | PROMOTER               | 1.233                                                        | 2.408                          | 4034.10            | 9714.80            | 2.969                          | 3275.83            | 9724.90            |
| A_68_P30477989 | chr15:98886157-98886201                           | NM_001163588:574        | Prph          | INSIDE                 | 1.233                                                        | 1.503                          | 1733.54            | 2605.56            | 1.853                          | 1555.19            | 2881.91            |

| ProbeName      | Target position of probe on CpG island microarray | TargetID               | GeneSymbol    | CpG island Description | Ratio of relative methylation (TiO <sub>2</sub> -NP/Vehicle) | Sham group                     |                    |                    | TiO <sub>2</sub> -H group      |                    |                    |
|----------------|---------------------------------------------------|------------------------|---------------|------------------------|--------------------------------------------------------------|--------------------------------|--------------------|--------------------|--------------------------------|--------------------|--------------------|
|                |                                                   |                        |               |                        |                                                              | Relative methylation (Cy5/Cy3) | Cy3 signal (Input) | Cy5 signal (MeDIP) | Relative methylation (Cy5/Cy3) | Cy3 signal (Input) | Cy5 signal (MeDIP) |
| A_68_P28042231 | chr11:95926737-95926781                           | NM_172300:-80          | Ube2z         | PROMOTER               | 1.233                                                        | 2.073                          | 281.69             | 584.05             | 2.556                          | 392.09             | 1002.33            |
| A_68_P27947946 | chr11:79068163-79068207                           | NM_019653:13           | Wsb1          | INSIDE                 | 1.233                                                        | 2.154                          | 2856.62            | 6154.39            | 2.657                          | 2088.05            | 5547.64            |
| A_68_P21067995 | chr2:24618544-24618589                            | NM_001042528:1         | Caena1b       | INSIDE                 | 1.232                                                        | 1.428                          | 1148.66            | 1640.72            | 1.759                          | 1047.72            | 1843.10            |
| A_68_P32111328 | chr19:40905903-40905947                           | NM_172839:156          | Cenj          | INSIDE                 | 1.232                                                        | 2.153                          | 771.12             | 1660.53            | 2.652                          | 689.25             | 1828.14            |
| A_68_P23448647 | chr5:4104421-4104465                              | NM_020010:255          | Cyp51         | INSIDE                 | 1.232                                                        | 2.400                          | 1632.82            | 3918.57            | 2.957                          | 1271.28            | 3759.14            |
| A_68_P22288625 | chr3:83843924-83843968                            | NM_172681:137          | D930015E06Rik | INSIDE                 | 1.232                                                        | 1.536                          | 1161.00            | 1783.82            | 1.893                          | 946.27             | 1791.52            |
| A_68_P23081271 | chr4:86394332-86394376                            | NM_001081014:-104      | Dennd4c       | PROMOTER               | 1.232                                                        | 1.610                          | 1405.26            | 2262.23            | 1.983                          | 1205.91            | 2391.42            |
| A_68_P23142413 | chr4:98786997-98787041                            | NM_026082:588          | Dock7         | INSIDE                 | 1.232                                                        | 2.294                          | 716.58             | 1644.00            | 2.826                          | 638.27             | 1804.07            |
| A_68_P21113255 | chr2:31944229-31944273                            | NM_175511:-5025        | Fam78a        | DIVERGENT_PROMOTER     | 1.232                                                        | 1.563                          | 852.24             | 1331.80            | 1.925                          | 804.68             | 1548.84            |
| A_68_P26458699 | chr9:42752539-42752583                            | NM_175481:-106         | Grik4         | PROMOTER               | 1.232                                                        | 2.405                          | 357.87             | 860.78             | 2.963                          | 360.24             | 1067.29            |
| A_68_P24868562 | chr6:135682934-135682978                          | NM_008171:440573       | Grin2b        | INSIDE                 | 1.232                                                        | 1.918                          | 500.98             | 960.81             | 2.363                          | 403.88             | 954.55             |
| A_68_P32152395 | chr19:47939790-47939835                           | NM_030051:-222         | Gsto2         | PROMOTER               | 1.232                                                        | 3.284                          | 741.51             | 2434.96            | 4.047                          | 623.46             | 2523.27            |
| A_68_P32095551 | chr19:37509175-37509219                           | NM_008245:-134         | Hhex          | PROMOTER               | 1.232                                                        | 1.399                          | 1105.66            | 1546.39            | 1.723                          | 1015.80            | 1750.62            |
| A_68_P30477336 | chr15:98748107-98748151                           | NM_029098:401          | Lmbr11        | INSIDE                 | 1.232                                                        | 2.239                          | 1327.10            | 2971.37            | 2.758                          | 1218.06            | 3359.49            |
| A_68_P23896966 | chr5:93370979-93371023                            | NM_001077596:43977     | Shroom3       | INSIDE                 | 1.232                                                        | 3.027                          | 621.66             | 1881.46            | 3.729                          | 603.54             | 2250.80            |
| A_68_P26031095 | chr8:89269939-89269983                            | NM_009172:-55          | Siah1a        | PROMOTER               | 1.232                                                        | 2.392                          | 492.98             | 1179.08            | 2.946                          | 436.18             | 1284.95            |
| A_68_P27365031 | chr10:94878605-94878649                           | NM_001168656:-508      | Socs2         | PROMOTER               | 1.232                                                        | 1.955                          | 1850.53            | 3617.23            | 2.409                          | 1495.91            | 3602.94            |
| A_68_P28745892 | A_68_P28745892                                    |                        | Unknown       | Unknown                | 1.232                                                        | 4.201                          | 312.61             | 1313.32            | 5.178                          | 301.70             | 1562.09            |
| A_68_P21594122 | chr2:123915605-123915649                          | ENSMUST00000137172:-78 |               | PROMOTER               | 1.232                                                        | 1.652                          | 1954.46            | 3229.10            | 2.036                          | 1701.34            | 3463.88            |
| A_68_P31619430 | chr18:35813598-35813642                           | NM_027222:-4599        | 2010001M09Rik | PROMOTER               | 1.231                                                        | 2.219                          | 312.19             | 692.64             | 2.732                          | 275.04             | 751.27             |
| A_68_P24430829 | chr6:49023914-49023958                            | NM_029353:143          | 2410003K15Rik | INSIDE                 | 1.231                                                        | 1.648                          | 426.66             | 703.25             | 2.029                          | 398.52             | 808.62             |
| A_68_P25952414 | chr8:73046706-73046750                            | NM_029366:351          | 2810422J05Rik | INSIDE                 | 1.231                                                        | 1.634                          | 3089.90            | 5050.44            | 2.013                          | 2292.98            | 4615.03            |
| A_68_P27282604 | chr10:79805724-79805768                           | NM_025629:5411         | Adams15       | INSIDE                 | 1.231                                                        | 1.712                          | 736.33             | 1260.42            | 2.107                          | 684.01             | 1441.16            |
| A_68_P26741570 | chr9:95307111-95307155                            | NM_018763:557          | Chst2         | INSIDE                 | 1.231                                                        | 1.791                          | 453.81             | 812.60             | 2.204                          | 372.06             | 820.11             |
| A_68_P27475788 | chr10:115911221-115911265                         | NM_021452:-663         | Kenmb4        | PROMOTER               | 1.231                                                        | 3.008                          | 1683.22            | 5062.79            | 3.704                          | 1542.11            | 5711.26            |
| A_68_P25022022 | chr7:29244663-29244707                            | NM_001141921:7428      | Lrfr1         | INSIDE                 | 1.231                                                        | 2.420                          | 534.11             | 1292.35            | 2.979                          | 495.36             | 1475.77            |
| A_68_P21822913 | chr2:165113069-165113113                          | NM_144893:237          | Ste35c2       | INSIDE                 | 1.231                                                        | 0.446                          | 1241.72            | 553.31             | 0.549                          | 946.93             | 519.56             |
| A_68_P24820215 | chr6:125311848-125311892                          | NM_011609:12130        | Tnfrsf1a      | INSIDE                 | 1.231                                                        | 2.922                          | 753.59             | 2201.62            | 3.597                          | 607.65             | 2185.54            |
| A_68_P24951680 | chr7:4982714-4982758                              | NM_001033383:10759     | Zfp865        | INSIDE                 | 1.231                                                        | 2.091                          | 297.20             | 621.40             | 2.573                          | 274.77             | 706.99             |
| A_68_P21797522 | chr2:160698309-160698353                          | NM_177263:396          | Zhx3          | INSIDE                 | 1.231                                                        | 1.339                          | 3465.47            | 4639.79            | 1.648                          | 2675.65            | 4409.78            |
| A_68_P21833422 | chr2:166888209-166888253                          | NM_001081005:-203      | 1500012F01Rik | PROMOTER               | 1.230                                                        | 2.330                          | 544.13             | 1267.81            | 2.866                          | 487.60             | 1397.67            |
| A_68_P30468157 | chr15:97078001-97078045                           | NM_001164563:-304      | Amigo2        | PROMOTER               | 1.230                                                        | 1.493                          | 1005.64            | 1501.01            | 1.835                          | 1008.90            | 1851.63            |
| A_68_P30502976 | chr15:103070313-103070357                         | NM_001076789:-87       | Cbx5          | DIVERGENT_PROMOTER     | 1.230                                                        | 0.450                          | 1455.01            | 655.15             | 0.554                          | 1164.57            | 645.05             |
| A_68_P31157311 | chr17:35195952-35195996                           | NM_001190449:-5        | Ddah2         | PROMOTER               | 1.230                                                        | 1.507                          | 3276.84            | 4938.01            | 1.854                          | 2586.63            | 4794.62            |
| A_68_P29361885 | chr13:118009364-118009408                         | NM_010330:7            | Emb           | INSIDE                 | 1.230                                                        | 2.294                          | 840.00             | 1927.26            | 2.822                          | 735.72             | 2076.20            |
| A_68_P28171532 | chr11:118338109-118338153                         | NM_172573:-143         | Engase        | PROMOTER               | 1.230                                                        | 1.412                          | 1846.85            | 2607.24            | 1.736                          | 1476.00            | 2562.76            |
| A_68_P22071607 | chr3:38786088-38786133                            | NM_183221:249          | Fat4          | INSIDE                 | 1.230                                                        | 2.228                          | 694.26             | 1546.83            | 2.740                          | 525.85             | 1440.62            |
| A_68_P25007848 | chr7:25795874-25795918                            | NM_008168:61492        | Grik5         | INSIDE                 | 1.230                                                        | 2.823                          | 3495.69            | 9868.19            | 3.473                          | 2584.16            | 8974.15            |
| A_68_P25196753 | chr7:75097151-75097195                            | NM_010513:30           | Igflr         | INSIDE                 | 1.230                                                        | 4.008                          | 1503.59            | 6027.14            | 4.931                          | 1262.54            | 6225.99            |
| A_68_P29952578 | chr14:121310982-121311026                         | NM_023579:589          | Ipo5          | INSIDE                 | 1.230                                                        | 1.677                          | 963.91             | 1616.15            | 2.062                          | 792.05             | 1633.04            |
| A_68_P28271091 | chr12:17551967-17552011                           | NM_013614:310          | Odc1          | INSIDE                 | 1.230                                                        | 2.162                          | 2582.31            | 5583.53            | 2.660                          | 2122.93            | 5647.21            |
| A_68_P31066146 | chr17:15663980-15664024                           | NM_008799:263          | Pdcd2         | INSIDE                 | 1.230                                                        | 2.695                          | 857.19             | 2310.36            | 3.316                          | 750.54             | 2488.78            |
| A_68_P30578589 | chr16:18248400-18248444                           | NM_011239:365          | Ranbp1        | INSIDE                 | 1.230                                                        | 1.705                          | 2260.66            | 3854.55            | 2.097                          | 1923.63            | 4034.56            |
| A_68_P21706316 | chr2:144096174-144096218                          | NR_030762:-4258        | Snord17       | PROMOTER               | 1.230                                                        | 2.303                          | 904.99             | 2083.99            | 2.832                          | 801.34             | 2269.41            |
| A_68_P26455637 | chr9:42280374-42280418                            | NM_173038:-87          | Tbcel         | PROMOTER               | 1.230                                                        | 1.651                          | 824.04             | 1360.52            | 2.031                          | 733.44             | 1489.33            |
| A_68_P27900651 | chr11:70245942-70245986                           | NM_145429:-190         | Arrb2         | PROMOTER               | 1.229                                                        | 1.546                          | 1553.06            | 2400.75            | 1.900                          | 1488.33            | 2827.45            |
| A_68_P21285104 | chr2:65076845-65076889                            | NM_027225:-183         | Cobll1        | PROMOTER               | 1.229                                                        | 0.412                          | 1598.81            | 658.86             | 0.506                          | 1269.58            | 642.91             |
| A_68_P27183508 | chr10:61441806-61441850                           | NM_007731:28           | Col13a1       | INSIDE                 | 1.229                                                        | 1.704                          | 2705.65            | 4610.97            | 2.094                          | 2021.23            | 4232.27            |
| A_68_P24620288 | chr6:88140437-88140481                            | NM_008090:-8199        | Gata2         | PROMOTER               | 1.229                                                        | 3.065                          | 3155.55            | 9672.95            | 3.768                          | 2633.69            | 9923.04            |
| A_68_P31624332 | chr18:36675376-36675420                           | NM_010415:61           | Hbegf         | INSIDE                 | 1.229                                                        | 2.145                          | 1199.99            | 2573.73            | 2.637                          | 1439.23            | 3794.92            |
| A_68_P20228742 | chr1:52784064-52784108                            | NM_133829:76           | Mfsd6         | INSIDE                 | 1.229                                                        | 1.361                          | 2780.57            | 3783.89            | 1.673                          | 2266.05            | 3790.85            |

| ProbeName      | Target position of probe on CpG island microarray | TargetID               | GeneSymbol    | CpG island Description | Ratio of relative methylation (TiO <sub>2</sub> -NP/Vehicle) | Sham group                     |                    |                    | TiO <sub>2</sub> -H group      |                    |                    |
|----------------|---------------------------------------------------|------------------------|---------------|------------------------|--------------------------------------------------------------|--------------------------------|--------------------|--------------------|--------------------------------|--------------------|--------------------|
|                |                                                   |                        |               |                        |                                                              | Relative methylation (Cy5/Cy3) | Cy3 signal (Input) | Cy5 signal (MeDIP) | Relative methylation (Cy5/Cy3) | Cy3 signal (Input) | Cy5 signal (MeDIP) |
| A_68_P30368847 | chr15:79664630-79664674                           | NM_001013360:111       | Npcd          | INSIDE                 | 1.229                                                        | 1.521                          | 3801.75            | 5782.91            | 1.869                          | 3069.43            | 5738.13            |
| A_68_P30961945 | chr16:91270311-91270355                           | NM_016968:319          | Olig1         | INSIDE                 | 1.229                                                        | 1.423                          | 866.91             | 1233.81            | 1.749                          | 745.77             | 1304.37            |
| A_68_P25730820 | chr8:27229765-27229809                            | NM_029965:-65          | Rnf170        | DIVERGENT_PROMOTER     | 1.229                                                        | 1.842                          | 464.17             | 854.77             | 2.263                          | 362.99             | 821.45             |
| A_68_P24630040 | chr6:89785772-89785816                            | NM_053221:9737         | Vmn1r42       | DOWNSTREAM             | 1.229                                                        | 2.967                          | 1374.81            | 4078.92            | 3.646                          | 1256.51            | 4581.76            |
| A_68_P27568222 | chr11:6289791-6289835                             | NM_001005867:-5315     | Zmiz2         | PROMOTER               | 1.229                                                        | 2.068                          | 685.07             | 1416.68            | 2.541                          | 569.82             | 1447.76            |
| A_68_P20718903 | chr1:153936776-153936820                          | NM_197990:652          | 1700025G04Rik | INSIDE                 | 1.228                                                        | 2.036                          | 4522.29            | 9208.00            | 2.501                          | 3098.69            | 7750.10            |
| A_68_P22905957 | chr4:49610300-49610344                            | NM_025944:420          | 2810432L12Rik | INSIDE                 | 1.228                                                        | 1.681                          | 1179.40            | 1982.04            | 2.063                          | 985.94             | 2033.96            |
| A_68_P22151288 | chr3:54859609-54859653                            | NM_007628:-653         | Cena1         | PROMOTER               | 1.228                                                        | 2.400                          | 1122.33            | 2693.33            | 2.947                          | 1034.44            | 3048.09            |
| A_68_P20910365 | chr1:188791961-188792005                          | NM_033077:688          | D1Pas1        | INSIDE                 | 1.228                                                        | 3.475                          | 1136.98            | 3950.91            | 4.268                          | 881.33             | 3761.77            |
| A_68_P24133866 | chr5:139626612-139626656                          | NM_001081265:458       | Heatr2        | INSIDE                 | 1.228                                                        | 2.083                          | 766.79             | 1596.99            | 2.557                          | 608.20             | 1555.28            |
| A_68_P25031211 | chr7:31145626-31145670                            | NM_175478:2143         | Lrln3         | INSIDE                 | 1.228                                                        | 2.437                          | 1319.81            | 3216.65            | 2.993                          | 1079.76            | 3231.79            |
| A_68_P30343816 | chr15:75578159-75578203                           | NM_194350:172          | Mafa          | INSIDE                 | 1.228                                                        | 2.750                          | 2383.80            | 6555.74            | 3.378                          | 2098.13            | 7087.88            |
| A_68_P28671530 | chr12:99927621-99927665                           | NM_011877:45213        | Ptpn21        | INSIDE                 | 1.228                                                        | 3.152                          | 2204.42            | 6948.39            | 3.870                          | 1444.78            | 5591.59            |
| A_68_P22826130 | chr4:33397227-33397271                            | NM_011884:-37          | Rngt          | PROMOTER               | 1.228                                                        | 3.959                          | 1538.77            | 6091.71            | 4.862                          | 1236.26            | 6010.36            |
| A_68_P22286846 | chr3:83570454-83570498                            | NM_009144:234          | Sfrp2         | INSIDE                 | 1.228                                                        | 1.617                          | 940.06             | 1520.06            | 1.986                          | 795.89             | 1580.52            |
| A_68_P28781896 | chr12:120087840-120087884                         | NM_177082:3061         | Sp8           | INSIDE                 | 1.228                                                        | 3.215                          | 1362.52            | 4380.64            | 3.949                          | 1219.70            | 4816.19            |
| A_68_P27787326 | chr11:50024305-50024349                           | NM_011018:-34          | Sqstm1        | PROMOTER               | 1.228                                                        | 2.761                          | 550.75             | 1520.66            | 3.390                          | 434.71             | 1473.52            |
| A_68_P21864909 | chr2:172375260-172375304                          | NM_001159696:-1208     | Tefap2c       | PROMOTER               | 1.228                                                        | 2.180                          | 691.57             | 1507.33            | 2.676                          | 597.23             | 1597.91            |
| A_68_P21610504 | chr2:126701750-126701794                          | NM_001164325:225       | Trpm7         | INSIDE                 | 1.228                                                        | 2.123                          | 1630.06            | 3460.12            | 2.607                          | 1496.67            | 3902.35            |
| A_68_P29604340 | chr14:52639614-52639658                           | NM_027248:772          | Zfp219        | INSIDE                 | 1.228                                                        | 1.544                          | 499.19             | 770.83             | 1.897                          | 451.01             | 855.39             |
| A_68_P25098516 | chr7:53604272-53604316                            | AK015435:95            |               | INSIDE                 | 1.228                                                        | 2.251                          | 1736.49            | 3908.75            | 2.764                          | 1378.33            | 3809.61            |
| A_68_P30462687 | chr15:96117084-96117128                           | NM_175251:-846         | Arid2         | PROMOTER               | 1.227                                                        | 1.901                          | 933.88             | 1775.24            | 2.333                          | 872.69             | 2035.94            |
| A_68_P32071736 | chr19:32786770-32786814                           | NM_026487:-4           | Atad1         | PROMOTER               | 1.227                                                        | 0.522                          | 1477.87            | 770.94             | 0.640                          | 1242.71            | 795.14             |
| A_68_P25503356 | chr7:134119822-134119866                          | NM_026638:-18          | Cdpt          | PROMOTER               | 1.227                                                        | 1.884                          | 912.21             | 1718.37            | 2.312                          | 756.91             | 1749.82            |
| A_68_P22954049 | chr4:59016297-59016341                            | NM_001033165:254       | Dnajc25       | INSIDE                 | 1.227                                                        | 2.696                          | 701.18             | 1890.34            | 3.308                          | 642.03             | 2123.55            |
| A_68_P27003034 | chr10:23070344-23070388                           | NM_010167:-657         | Eya4          | PROMOTER               | 1.227                                                        | 1.943                          | 1594.66            | 3098.56            | 2.384                          | 1430.38            | 3410.50            |
| A_68_P22369563 | chr3:100293548-100293593                          | NM_001142952:-455      | Fam46c        | PROMOTER               | 1.227                                                        | 1.472                          | 667.29             | 981.98             | 1.806                          | 519.22             | 937.91             |
| A_68_P22504682 | chr7:134376720-134376764                          | NR_030674:-98          | Gm4532        | DIVERGENT_PROMOTER     | 1.227                                                        | 2.153                          | 993.33             | 2138.67            | 2.642                          | 824.46             | 2178.34            |
| A_68_P29982185 | chr15:5093533-5093577                             | NM_001013367:-306      | Prkaa1        | PROMOTER               | 1.227                                                        | 2.084                          | 601.67             | 1254.00            | 2.558                          | 518.63             | 1326.80            |
| A_68_P30463770 | chr15:96290889-96290933                           | NM_028148:364          | Scaf11        | INSIDE                 | 1.227                                                        | 2.041                          | 1279.57            | 2611.67            | 2.503                          | 1313.24            | 3287.52            |
| A_68_P30348909 | chr15:76354254-76354298                           | NM_130893:-1717        | Sert1         | PROMOTER               | 1.227                                                        | 2.435                          | 854.93             | 2081.43            | 2.987                          | 702.24             | 2097.31            |
| A_68_P23403484 | chr4:149329133-149329178                          | NM_029035:-40          | Spsb1         | PROMOTER               | 1.227                                                        | 1.543                          | 1454.34            | 2244.66            | 1.894                          | 1259.78            | 2386.46            |
| A_68_P22323362 | chr3:89884192-89884236                            | NM_022314:7599         | Tpm3          | INSIDE                 | 1.227                                                        | 2.084                          | 4837.23            | 10081.20           | 2.556                          | 3971.26            | 10152.08           |
| A_68_P31301680 | chr17:65962034-65962078                           | NM_013933:839          | Vapa          | INSIDE                 | 1.227                                                        | 1.753                          | 516.65             | 905.61             | 2.151                          | 511.07             | 1099.12            |
| A_68_P24049903 | chr5:122804592-122804636                          | NM_019780:193          | Vps29         | INSIDE                 | 1.227                                                        | 1.577                          | 1546.24            | 2438.78            | 1.936                          | 1363.23            | 2638.68            |
| A_68_P23195376 | chr4:107973405-107973449                          | NM_001033634:269       | Zyg11b        | INSIDE                 | 1.227                                                        | 1.496                          | 4893.35            | 7321.19            | 1.835                          | 3773.54            | 6924.85            |
| A_68_P22322663 | chr3:89764566-89764610                            | NM_001081182:2842      | Atp8b2        | INSIDE                 | 1.226                                                        | 2.640                          | 457.10             | 1206.63            | 3.236                          | 449.16             | 1453.58            |
| A_68_P27903678 | chr11:70796278-70796322                           | NM_007573:228          | C1qbp         | INSIDE                 | 1.226                                                        | 2.295                          | 1922.10            | 4410.66            | 2.814                          | 1771.75            | 4986.10            |
| A_68_P20166302 | chr1:39593044-39593088                            | NM_028043:420          | D1Bwg0212e    | INSIDE                 | 1.226                                                        | 2.595                          | 718.46             | 1864.56            | 3.183                          | 706.12             | 2247.34            |
| A_68_P23365990 | chr4:141346639-141346683                          | NM_172338:-101         | Dnajc16       | DIVERGENT_PROMOTER     | 1.226                                                        | 1.835                          | 1744.87            | 3201.47            | 2.250                          | 1531.30            | 3444.89            |
| A_68_P23613128 | chr5:37729744-37729788                            | NM_145920:50           | Evc2          | INSIDE                 | 1.226                                                        | 2.168                          | 750.76             | 1627.35            | 2.657                          | 585.43             | 1555.35            |
| A_68_P23927135 | chr5:100407424-100407468                          | NM_001077265:511       | Hnrnpd        | INSIDE                 | 1.226                                                        | 0.432                          | 1994.52            | 862.44             | 0.530                          | 1578.39            | 836.56             |
| A_68_P30342689 | chr15:75396844-75396888                           | NM_001135689:212       | Ly6h          | INSIDE                 | 1.226                                                        | 2.454                          | 1590.39            | 3903.43            | 3.008                          | 1369.01            | 4118.41            |
| A_68_P27500270 | chr10:120335605-120335649                         | NM_177092:401          | Msrb3         | INSIDE                 | 1.226                                                        | 3.116                          | 1388.11            | 3755.11            | 3.316                          | 1316.25            | 4365.29            |
| A_68_P28514079 | chr12:70458006-70458050                           | NM_025441:125          | Nemf          | INSIDE                 | 1.226                                                        | 2.550                          | 1071.88            | 2733.09            | 3.127                          | 986.98             | 3086.25            |
| A_68_P31867986 | chr18:81168668-81168712                           | NM_178280:14627        | Sall3         | INSIDE                 | 1.226                                                        | 2.009                          | 721.32             | 1449.13            | 2.462                          | 616.64             | 1518.47            |
| A_68_P32672211 | chrX:131010176-131010220                          | NM_028958:831          | Taf7l         | INSIDE                 | 1.226                                                        | 2.102                          | 3097.66            | 6512.06            | 2.577                          | 1611.16            | 4151.38            |
| A_68_P27507137 | chr10:121534278-121534322                         | NM_153059:-142         | Tmem5         | PROMOTER               | 1.226                                                        | 2.309                          | 2895.69            | 6687.54            | 2.832                          | 2106.24            | 5964.45            |
| A_68_P27287684 | chr10:80606810-80606854                           | NM_010731:7817         | Zbtb7a        | INSIDE                 | 1.226                                                        | 1.856                          | 369.15             | 684.96             | 2.275                          | 346.56             | 788.41             |
| A_68_P28050434 | chr11:97277178-97277222                           | ENSMUST00000121799:354 |               | INSIDE                 | 1.226                                                        | 1.575                          | 872.23             | 1374.09            | 1.932                          | 737.13             | 1424.27            |
| A_68_P21138537 | chr2:36066471-36066515                            | ENSMUST00000128242:201 |               | INSIDE                 | 1.226                                                        | 1.921                          | 686.54             | 1319.17            | 2.356                          | 618.62             | 1457.47            |

| ProbeName      | Target position of probe on CpG island microarray | TargetID               | GeneSymbol | CpG island Description | Ratio of relative methylation (TiO <sub>2</sub> -NP/Vehicle) | Sham group                     |                    |                    | TiO <sub>2</sub> -H group      |                    |                    |
|----------------|---------------------------------------------------|------------------------|------------|------------------------|--------------------------------------------------------------|--------------------------------|--------------------|--------------------|--------------------------------|--------------------|--------------------|
|                |                                                   |                        |            |                        |                                                              | Relative methylation (Cy5/Cy3) | Cy3 signal (Input) | Cy5 signal (MeDIP) | Relative methylation (Cy5/Cy3) | Cy3 signal (Input) | Cy5 signal (MeDIP) |
| A_68_P28183237 | chr11:120096983-120097028                         | NM_198423:2745         | Bahcc1     | INSIDE                 | 1.225                                                        | 2.444                          | 219.70             | 536.84             | 2.992                          | 196.95             | 589.36             |
| A_68_P28160638 | chr11:116515525-116515569                         | NM_030206:81           | Cygb       | INSIDE                 | 1.225                                                        | 1.769                          | 2344.97            | 4147.39            | 2.167                          | 1835.19            | 3976.36            |
| A_68_P27992419 | chr11:86887561-86887605                           | NM_025638:57           | Gdpd1      | INSIDE                 | 1.225                                                        | 2.144                          | 824.01             | 1766.68            | 2.627                          | 735.40             | 1932.04            |
| A_68_P31929500 | chr19:5567652-5567696                             | NM_001033448:-399      | Gm962      | DIVERGENT_PROMOTER     | 1.225                                                        | 1.689                          | 1417.64            | 2394.41            | 2.069                          | 1199.60            | 2482.25            |
| A_68_P30540355 | chr16:9994229-9994273                             | NM_008170:-1624        | Grin2a     | PROMOTER               | 1.225                                                        | 1.693                          | 1423.74            | 2410.40            | 2.074                          | 1225.16            | 2540.53            |
| A_68_P29247522 | chr13:97440489-97440533                           | NM_008255:381          | Hmgcr      | INSIDE                 | 1.225                                                        | 1.577                          | 1808.36            | 2852.06            | 1.932                          | 1518.68            | 2933.52            |
| A_68_P28997661 | chr13:44826453-44826497                           | NM_001205043:-165      | Jarid2     | PROMOTER               | 1.225                                                        | 1.839                          | 1510.37            | 2777.67            | 2.252                          | 1365.55            | 3075.17            |
| A_68_P32218824 | chr19:59420634-59420678                           | NM_001033222:-386      | Pdzd8      | PROMOTER               | 1.225                                                        | 1.969                          | 962.38             | 1895.01            | 2.412                          | 839.52             | 2025.30            |
| A_68_P29479231 | chr14:26513717-26513761                           | NM_134084:83           | Ppif       | INSIDE                 | 1.225                                                        | 1.353                          | 3010.47            | 4073.36            | 1.658                          | 2550.60            | 4228.16            |
| A_68_P24092504 | chr5:130647587-130647631                          | NM_001199059:-80       | Rabgef1    | PROMOTER               | 1.225                                                        | 2.954                          | 1188.45            | 3510.89            | 3.618                          | 968.47             | 3504.16            |
| A_68_P21920095 | chr3:5219581-5219625                              | NM_030708:1049         | Zfx4       | INSIDE                 | 1.225                                                        | 1.664                          | 914.63             | 1521.85            | 2.039                          | 800.95             | 1632.75            |
| A_68_P20872225 | chr1:181733706-181733750                          | NM_026375:418          | Ahtf1      | INSIDE                 | 1.224                                                        | 1.839                          | 948.71             | 1744.62            | 2.251                          | 850.17             | 1914.11            |
| A_68_P28576088 | chr12:81620372-81620416                           | NM_001081421:418       | Galnt1     | INSIDE                 | 1.224                                                        | 2.315                          | 1570.96            | 3637.15            | 2.835                          | 1387.99            | 3934.54            |
| A_68_P20432981 | chr1:91825501-91825545                            | NM_010262:2229         | Gbx2       | INSIDE                 | 1.224                                                        | 1.784                          | 1245.97            | 2222.38            | 2.183                          | 1048.73            | 2289.06            |
| A_68_P30659188 | chr16:33684818-33684862                           | NM_175256:289          | Heg1       | INSIDE                 | 1.224                                                        | 1.761                          | 634.91             | 1117.88            | 2.156                          | 557.05             | 1200.85            |
| A_68_P31834167 | chr18:75120830-75120874                           | NM_010720:65           | Lipg       | INSIDE                 | 1.224                                                        | 1.785                          | 2507.39            | 4475.37            | 2.185                          | 2116.70            | 4625.96            |
| A_68_P31099061 | chr17:24833259-24833303                           | NM_027988:102          | Noxo1      | INSIDE                 | 1.224                                                        | 1.704                          | 3566.40            | 6076.17            | 2.085                          | 2770.54            | 5776.03            |
| A_68_P20354546 | chr1:75502170-75502214                            | NM_178884:835          | Obs1       | INSIDE                 | 1.224                                                        | 1.496                          | 1182.11            | 1767.89            | 1.830                          | 1036.25            | 1896.50            |
| A_68_P29618379 | chr14:56159407-56159453                           | NM_028994:328          | Pek2       | INSIDE                 | 1.224                                                        | 2.157                          | 292.61             | 631.02             | 2.640                          | 313.77             | 828.25             |
| A_68_P21250387 | chr2:58999594-58999638                            | NM_026361:710          | Pkp4       | INSIDE                 | 1.224                                                        | 3.545                          | 527.38             | 1869.54            | 4.339                          | 529.44             | 2297.29            |
| A_68_P28746794 | chr12:113146363-113146407                         | NM_011625:-118         | Ppp1r13b   | PROMOTER               | 1.224                                                        | 2.010                          | 433.82             | 871.86             | 2.460                          | 428.59             | 1054.41            |
| A_68_P31106620 | chr17:25974088-25974132                           | NM_144816:-38          | Rhbdl1     | PROMOTER               | 1.224                                                        | 2.405                          | 2457.35            | 5909.73            | 2.944                          | 1910.25            | 5623.49            |
| A_68_P23699213 | chr5:53604822-53604866                            | NM_172710:-153         | Sell13     | PROMOTER               | 1.224                                                        | 1.517                          | 2365.84            | 3590.14            | 1.858                          | 2017.93            | 3748.93            |
| A_68_P23440102 | chr4:155079253-155079297                          | NM_026899:351          | Ssu72      | INSIDE                 | 1.224                                                        | 4.098                          | 850.86             | 3486.75            | 5.017                          | 726.50             | 3644.95            |
| A_68_P20998558 | chr2:9969914-9969958                              | NM_027748:300          | Taf3       | INSIDE                 | 1.224                                                        | 1.790                          | 1109.09            | 1985.04            | 2.191                          | 884.61             | 1938.57            |
| A_68_P28176626 | chr11:119089661-119089705                         | NM_172443:131          | Tbc1d16    | INSIDE                 | 1.224                                                        | 2.327                          | 1982.20            | 4612.60            | 2.849                          | 1677.17            | 4778.38            |
| A_68_P31213969 | chr17:47875277-47875321                           | NM_001161723:419       | Tcfef      | INSIDE                 | 1.224                                                        | 2.946                          | 345.45             | 1017.55            | 3.607                          | 288.05             | 1038.93            |
| A_68_P31386730 | chr17:81464149-81464193                           | NM_028138:255          | Thumpd2    | INSIDE                 | 1.224                                                        | 1.716                          | 1027.58            | 1763.14            | 2.100                          | 991.87             | 2082.99            |
| A_68_P30963823 | chr16:91597831-91597875                           | NM_030018:73           | Tmem50b    | INSIDE                 | 1.224                                                        | 1.669                          | 1208.84            | 2017.90            | 2.043                          | 1008.54            | 2060.89            |
| A_68_P26644964 | chr9:75459172-75459216                            | NM_016711:-62          | Tmod2      | PROMOTER               | 1.224                                                        | 2.097                          | 2242.67            | 4703.79            | 2.567                          | 1736.67            | 4458.86            |
| A_68_P31542075 | chr18:21054261-21054305                           | NM_177038:297          | Trappc8    | INSIDE                 | 1.224                                                        | 1.757                          | 687.06             | 1207.20            | 2.151                          | 636.80             | 1369.72            |
| A_68_P20551186 | chr1:120207831-120207875                          | NM_011650:-143         | Tsn        | PROMOTER               | 1.224                                                        | 1.743                          | 552.94             | 963.58             | 2.132                          | 480.37             | 1024.28            |
| A_68_P22630557 | chr3:148650752-148650796                          | ENSMUST0000009815:1506 |            | INSIDE                 | 1.224                                                        | 1.768                          | 9995.66            | 17669.51           | 2.163                          | 6813.05            | 14739.70           |
| A_68_P30671880 | chr16:35735579-35735623                           | NM_153550:33842        | Dire2      | INSIDE                 | 1.223                                                        | 2.148                          | 1465.32            | 3147.91            | 2.626                          | 1190.41            | 3126.37            |
| A_68_P30981934 | chr16:94748127-94748171                           | NM_007834:88           | Dscr3      | INSIDE                 | 1.223                                                        | 1.877                          | 1063.38            | 1995.83            | 2.295                          | 956.24             | 2194.75            |
| A_68_P21585581 | chr2:122124764-122124808                          | NM_025777:151          | Duoxa2     | INSIDE                 | 1.223                                                        | 14.281                         | 862.74             | 12320.62           | 17.466                         | 674.94             | 11788.86           |
| A_68_P24142816 | chr5:141178207-141178251                          | NM_028833:104          | Iqce       | INSIDE                 | 1.223                                                        | 2.460                          | 793.10             | 1950.80            | 3.009                          | 623.60             | 1876.61            |
| A_68_P24112797 | chr5:135164410-135164454                          | NM_010717:28           | Limk1      | INSIDE                 | 1.223                                                        | 3.946                          | 1189.66            | 4694.60            | 4.826                          | 1031.39            | 4977.17            |
| A_68_P23588234 | chr5:33678349-33678393                            | NM_021500:150          | Maea       | INSIDE                 | 1.223                                                        | 2.187                          | 3783.12            | 8272.60            | 2.674                          | 3137.32            | 8388.58            |
| A_68_P29116722 | chr13:69750305-69750349                           | NM_175283:15           | Srd5a1     | INSIDE                 | 1.223                                                        | 1.700                          | 2550.30            | 4335.32            | 2.079                          | 1885.09            | 3918.71            |
| A_68_P21579355 | chr2:120997099-120997143                          | NM_153387:179          | Tubgcp4    | INSIDE                 | 1.223                                                        | 1.905                          | 1073.76            | 2045.52            | 2.330                          | 891.10             | 2076.03            |
| A_68_P32326600 | chrX:35542695-35542742                            | NM_001079513:-251      | Zbtb33     | PROMOTER               | 1.223                                                        | 2.961                          | 616.99             | 1826.62            | 3.621                          | 430.10             | 1557.23            |
| A_68_P28741418 | chr12:112215432-112215476                         | NM_175207:1777         | Ankrd9     | INSIDE                 | 1.222                                                        | 2.621                          | 1325.34            | 3473.50            | 3.204                          | 1058.32            | 3390.41            |
| A_68_P21425706 | chr2:91805641-91805685                            | NM_138306:-1942        | Dgkz       | PROMOTER               | 1.222                                                        | 1.905                          | 683.84             | 1302.55            | 2.327                          | 598.46             | 1392.86            |
| A_68_P32743940 | chrX:147482252-147482296                          | NM_008001:499          | Fgd1       | INSIDE                 | 1.222                                                        | 2.341                          | 449.34             | 1051.74            | 2.861                          | 291.76             | 834.66             |
| A_68_P20455651 | chr1:95342033-95342077                            | NM_133808:33331        | Hdlbp      | INSIDE                 | 1.222                                                        | 1.584                          | 1424.42            | 2256.09            | 1.936                          | 1236.06            | 2393.27            |
| A_68_P29717288 | chr14:73784719-73784763                           | NM_008410:338          | Itm2b      | INSIDE                 | 1.222                                                        | 4.968                          | 7211.91            | 35827.01           | 6.068                          | 5508.43            | 33427.36           |
| A_68_P20510207 | chr1:108656347-108656391                          | NM_027534:-49          | Kdsr       | PROMOTER               | 1.222                                                        | 1.514                          | 1734.11            | 2625.89            | 1.851                          | 1781.69            | 3297.17            |
| A_68_P22171315 | chr3:58809811-58809855                            | NM_177855:-1067        | Med121     | PROMOTER               | 1.222                                                        | 2.528                          | 570.34             | 1442.07            | 3.091                          | 511.31             | 1580.24            |
| A_68_P31208519 | chr17:46848833-46848877                           | NM_145488:443          | Pex6       | INSIDE                 | 1.222                                                        | 3.867                          | 962.67             | 3722.62            | 4.726                          | 920.14             | 4348.54            |
| A_68_P32142309 | chr19:46222327-46222371                           | NM_008852:467          | Pitx3      | INSIDE                 | 1.222                                                        | 2.179                          | 2169.91            | 4727.81            | 2.662                          | 1695.21            | 4512.46            |



| ProbeName      | Target position of probe on CpG island microarray | TargetID           | GeneSymbol    | CpG island Description | Ratio of relative methylation (TiO <sub>2</sub> -NP/Vehicle) | Sham group                     |                    |                    | TiO <sub>2</sub> -H group      |                    |                    |
|----------------|---------------------------------------------------|--------------------|---------------|------------------------|--------------------------------------------------------------|--------------------------------|--------------------|--------------------|--------------------------------|--------------------|--------------------|
|                |                                                   |                    |               |                        |                                                              | Relative methylation (Cy5/Cy3) | Cy3 signal (Input) | Cy5 signal (MeDIP) | Relative methylation (Cy5/Cy3) | Cy3 signal (Input) | Cy5 signal (MeDIP) |
| A_68_P25091653 | chr7:52437711-52437755                            | NM_053256:1368     | Pth2          | DOWNSTREAM             | 1.222                                                        | 3.688                          | 630.07             | 2323.72            | 4.506                          | 511.43             | 2304.57            |
| A_68_P24061235 | chr5:124875362-124875406                          | NM_001081203:539   | Sbno1         | INSIDE                 | 1.222                                                        | 4.184                          | 1675.42            | 7009.98            | 5.115                          | 1312.24            | 6711.56            |
| A_68_P27926563 | chr11:75328969-75329013                           | NM_001004157:1948  | Scarf1        | INSIDE                 | 1.222                                                        | 2.748                          | 594.63             | 1634.26            | 3.359                          | 535.87             | 1799.89            |
| A_68_P22169673 | chr3:58495733-58495777                            | NM_009174:556      | Siah2         | INSIDE                 | 1.222                                                        | 2.583                          | 943.81             | 2438.21            | 3.156                          | 914.83             | 2887.66            |
| A_68_P28781791 | chr12:120075046-120075090                         | NM_177082:-9733    | Sp8           | PROMOTER               | 1.222                                                        | 1.748                          | 2047.32            | 3578.11            | 2.136                          | 1760.30            | 3760.04            |
| A_68_P31479221 | chr18:7868637-7868681                             | NR_027465:-197     | Wac           | PROMOTER               | 1.222                                                        | 2.412                          | 621.15             | 1498.38            | 2.947                          | 593.00             | 1747.85            |
| A_68_P22408056 | chr3:107499381-107499425                          | NM_145542:64       | Aheyl1        | INSIDE                 | 1.221                                                        | 3.804                          | 604.76             | 2300.36            | 4.643                          | 582.18             | 2702.99            |
| A_68_P21068910 | chr2:24790687-24790731                            | NM_001162485:93    | Arrdc1        | INSIDE                 | 1.221                                                        | 1.760                          | 1978.72            | 3481.87            | 2.148                          | 1658.76            | 3563.63            |
| A_68_P21566800 | chr2:118728429-118728473                          | NM_001045523:1100  | Bahd1         | INSIDE                 | 1.221                                                        | 1.529                          | 1105.76            | 1691.24            | 1.867                          | 1087.07            | 2030.10            |
| A_68_P25661488 | chr8:12430745-12430789                            | NR_027975:44996    | Gm5607        | INSIDE                 | 1.221                                                        | 1.440                          | 3591.20            | 5170.10            | 1.758                          | 2564.52            | 4508.14            |
| A_68_P21283784 | chr2:64860481-64860525                            | NM_016719:321      | Grb14         | INSIDE                 | 1.221                                                        | 1.616                          | 2437.16            | 3939.07            | 1.974                          | 2045.12            | 4037.12            |
| A_68_P32215806 | chr19:58935621-58935665                           | NM_175199:-168     | Hspa12a       | PROMOTER               | 1.221                                                        | 1.792                          | 1191.09            | 2134.23            | 2.188                          | 1002.16            | 2192.71            |
| A_68_P24818876 | chr6:125081706-125081750                          | NM_138747:-172     | Nop2          | PROMOTER               | 1.221                                                        | 1.805                          | 1792.87            | 3236.23            | 2.204                          | 1450.08            | 3195.48            |
| A_68_P26011767 | chr8:85388102-85388146                            | NM_177378:870      | Rnf150        | INSIDE                 | 1.221                                                        | 1.556                          | 700.95             | 1090.48            | 1.900                          | 616.87             | 1172.03            |
| A_68_P28167721 | chr11:117734583-117734627                         | NM_027919:236      | Tha1          | INSIDE                 | 1.221                                                        | 1.577                          | 609.44             | 961.04             | 1.926                          | 572.04             | 1101.77            |
| A_68_P29260367 | chr13:99696244-99696288                           | NM_178716:73       | Tnpo1         | INSIDE                 | 1.221                                                        | 2.206                          | 1171.67            | 2585.16            | 2.694                          | 958.39             | 2582.00            |
| A_68_P21836563 | chr2:167456985-167457029                          | NM_023230:499      | Ube2v1        | INSIDE                 | 1.221                                                        | 2.095                          | 1821.01            | 3814.31            | 2.557                          | 1477.22            | 3776.89            |
| A_68_P31625689 | chr18:36920123-36920167                           | NM_026464:252      | Wdr55         | INSIDE                 | 1.221                                                        | 1.417                          | 2263.84            | 3206.83            | 1.730                          | 1740.24            | 3010.16            |
| A_68_P31408615 | chr17:85489810-85489854                           | NM_028576:-207     | 1700106N22Rik | DIVERGENT_PROMOTER     | 1.220                                                        | 1.724                          | 2932.18            | 5055.40            | 2.103                          | 2255.24            | 4741.77            |
| A_68_P31331955 | chr17:71351299-71351343                           | NM_026064:553      | 2900073G15Rik | INSIDE                 | 1.220                                                        | 2.185                          | 2941.98            | 6429.19            | 2.667                          | 2397.31            | 6393.55            |
| A_68_P32957258 | chr17:8476452-8476496                             | NM_018819:-203     | Brp441        | PROMOTER               | 1.220                                                        | 1.425                          | 1595.27            | 2273.87            | 1.739                          | 1415.48            | 2461.45            |
| A_68_P24798986 | chr6:120481161-120481205                          | NM_144815:135      | Cecr5         | INSIDE                 | 1.220                                                        | 1.599                          | 1030.33            | 1647.33            | 1.950                          | 902.76             | 1760.81            |
| A_68_P21477095 | chr2:102291921-102291965                          | NM_010218:7        | Fjx1          | INSIDE                 | 1.220                                                        | 1.914                          | 597.28             | 1143.08            | 2.334                          | 524.22             | 1223.61            |
| A_68_P25087550 | chr7:51717698-51717742                            | NM_198250:19864    | Lrrc4b        | INSIDE                 | 1.220                                                        | 1.787                          | 967.20             | 1728.71            | 2.181                          | 847.95             | 1849.50            |
| A_68_P23334088 | chr4:136025956-136026001                          | NM_024452:303      | Luzp1         | INSIDE                 | 1.220                                                        | 3.249                          | 216.59             | 703.69             | 3.964                          | 185.84             | 736.66             |
| A_68_P26041378 | chr8:91045300-91045344                            | NM_001163660:-6209 | Nkd1          | PROMOTER               | 1.220                                                        | 3.426                          | 457.24             | 1566.51            | 4.181                          | 391.00             | 1634.88            |
| A_68_P30542114 | chr16:10411911-10411955                           | NM_011955:-98      | Nubp1         | PROMOTER               | 1.220                                                        | 2.917                          | 1464.43            | 4272.17            | 3.559                          | 1146.64            | 4081.18            |
| A_68_P32240644 | chrX:7455750-7455794                              | NM_138606:341      | Pim2          | INSIDE                 | 1.220                                                        | 1.739                          | 2037.48            | 3542.39            | 2.122                          | 956.24             | 2028.70            |
| A_68_P31253472 | chr17:56175685-56175729                           | NM_013664:293      | Sh3gl1        | INSIDE                 | 1.220                                                        | 2.499                          | 680.59             | 1700.67            | 3.048                          | 629.49             | 1918.47            |
| A_68_P26644962 | chr9:75459020-75459064                            | NM_016711:90       | Tmod2         | INSIDE                 | 1.220                                                        | 2.056                          | 1367.80            | 2811.58            | 2.509                          | 1144.93            | 2872.09            |
| A_68_P23111973 | chr4:93001689-93001733                            | NM_026954:492      | Tusc1         | INSIDE                 | 1.220                                                        | 3.702                          | 429.98             | 1591.87            | 4.517                          | 408.78             | 1846.61            |
| A_68_P27181846 | chr10:61159115-61159159                           | NM_027912:875      | Tysnd1        | INSIDE                 | 1.220                                                        | 2.673                          | 839.86             | 2244.68            | 3.262                          | 782.79             | 2553.38            |
| A_68_P20827837 | chr1:173341785-173341830                          | NM_009480:-4       | Usf1          | PROMOTER               | 1.220                                                        | 1.481                          | 1011.33            | 1497.82            | 1.807                          | 846.49             | 1529.96            |
| A_68_P30378286 | chr15:81353764-81353808                           |                    |               | Unknown                | 1.220                                                        | 2.355                          | 872.83             | 2055.76            | 2.875                          | 813.49             | 2338.46            |
| A_68_P20874334 | chr1:182126153-182126197                          | NM_023341:-23      | Adck3         | PROMOTER               | 1.219                                                        | 2.146                          | 957.16             | 2053.87            | 2.616                          | 802.24             | 2098.32            |
| A_68_P25370481 | chr7:108079952-108079996                          | NM_001081116:701   | Arhgef17      | INSIDE                 | 1.219                                                        | 3.161                          | 666.69             | 2107.10            | 3.852                          | 562.87             | 2168.40            |
| A_68_P32260375 | chrX:11668929-11668973                            | NM_001168321:68531 | Bcor          | INSIDE                 | 1.219                                                        | 1.666                          | 453.85             | 756.20             | 2.031                          | 284.92             | 578.67             |
| A_68_P21565620 | chr2:118529638-118529682                          | NM_001081971:39    | Gm1337        | INSIDE                 | 1.219                                                        | 3.180                          | 825.42             | 2625.01            | 3.876                          | 759.57             | 2944.15            |
| A_68_P28041811 | chr11:95852863-95852907                           | NM_009951:14374    | Igf2bp1       | INSIDE                 | 1.219                                                        | 1.554                          | 1463.15            | 2274.31            | 1.895                          | 1125.11            | 2132.18            |
| A_68_P32082882 | chr19:34996734-34996778                           | NM_183046:-91      | Kif20b        | PROMOTER               | 1.219                                                        | 1.637                          | 663.28             | 1085.95            | 1.996                          | 570.64             | 1139.14            |
| A_68_P27624062 | chr11:18927325-18927369                           | NM_001193271:-8374 | Meis1         | PROMOTER               | 1.219                                                        | 2.226                          | 514.50             | 1145.18            | 2.714                          | 467.18             | 1268.00            |
| A_68_P23278955 | chr4:125914068-125914112                          | NM_001145970:19473 | Mtbp7d1       | INSIDE                 | 1.219                                                        | 2.742                          | 1776.84            | 4872.62            | 3.343                          | 1522.05            | 5087.55            |
| A_68_P23236917 | chr4:117540757-117540801                          | NM_008135:32916    | Slc6a9        | INSIDE                 | 1.219                                                        | 2.076                          | 2217.44            | 4602.91            | 2.530                          | 1955.98            | 4949.45            |
| A_68_P27966235 | chr11:82248010-82248054                           | NM_023438:45631    | Tmem132c      | INSIDE                 | 1.219                                                        | 1.387                          | 1092.69            | 1515.42            | 1.690                          | 798.51             | 1349.42            |
| A_68_P31620889 | chr18:36079889-36079933                           | AK021191:7125      |               | DOWNSTREAM             | 1.219                                                        | 2.143                          | 940.11             | 2014.98            | 2.613                          | 879.30             | 2297.45            |
| A_68_P27971499 | chr11:83253762-83253806                           | NM_025492:2589     | 1700020L24Rik | INSIDE                 | 1.218                                                        | 2.503                          | 284.99             | 713.23             | 3.049                          | 277.22             | 845.18             |
| A_68_P23545744 | chr5:24606762-24606806                            | NR_027851:-8       | 2900005J15Rik | DIVERGENT_PROMOTER     | 1.218                                                        | 1.546                          | 1476.11            | 2281.50            | 1.882                          | 1334.20            | 2511.10            |
| A_68_P27257131 | chr10:75022752-75022796                           | NM_198860:301      | Al646023      | INSIDE                 | 1.218                                                        | 1.899                          | 1136.89            | 2158.93            | 2.312                          | 950.89             | 2198.63            |
| A_68_P26234305 | chr8:125100749-125100793                          | NM_009698:37       | Aprt          | INSIDE                 | 1.218                                                        | 3.940                          | 10683.97           | 42096.27           | 4.798                          | 6517.13            | 31271.70           |
| A_68_P28153160 | chr11:115243190-115243234                         | NM_001080929:-17   | Cdr2l         | PROMOTER               | 1.218                                                        | 1.777                          | 1294.07            | 2299.80            | 2.165                          | 1141.67            | 2471.44            |
| A_68_P29618487 | chr14:56179252-56179296                           | NM_001199009:-485  | Deaf11        | PROMOTER               | 1.218                                                        | 1.689                          | 1309.25            | 2211.35            | 2.057                          | 867.90             | 1784.85            |

| ProbeName      | Target position of probe on CpG island microarray | TargetID               | GeneSymbol    | CpG island Description | Ratio of relative methylation (TiO <sub>2</sub> -NP/Vehicle) | Sham group                     |                    |                    | TiO <sub>2</sub> -H group      |                    |                    |
|----------------|---------------------------------------------------|------------------------|---------------|------------------------|--------------------------------------------------------------|--------------------------------|--------------------|--------------------|--------------------------------|--------------------|--------------------|
|                |                                                   |                        |               |                        |                                                              | Relative methylation (Cy5/Cy3) | Cy3 signal (Input) | Cy5 signal (MeDIP) | Relative methylation (Cy5/Cy3) | Cy3 signal (Input) | Cy5 signal (MeDIP) |
| A_68_P27572316 | chr11:7113730-7113774                             | NM_008343:174          | Igfbp3        | INSIDE                 | 1.218                                                        | 1.530                          | 1434.05            | 2193.49            | 1.863                          | 1104.16            | 2057.00            |
| A_68_P22934420 | chr4:55543726-55543770                            | NM_010637:1599         | Klf4          | INSIDE                 | 1.218                                                        | 1.693                          | 1092.36            | 1849.56            | 2.062                          | 990.88             | 2043.25            |
| A_68_P26537258 | chr9:56467405-56467449                            | NM_181074:65634        | Lingo1        | INSIDE                 | 1.218                                                        | 5.982                          | 3327.82            | 19905.82           | 7.288                          | 1983.17            | 14453.23           |
| A_68_P27542076 | chr10:128003183-128003227                         | NM_011119:-214         | Pa2g4         | PROMOTER               | 1.218                                                        | 2.281                          | 653.65             | 1491.04            | 2.778                          | 574.51             | 1596.07            |
| A_68_P22081520 | chr3:40603976-40604020                            | NM_011495:126          | Plk4          | INSIDE                 | 1.218                                                        | 3.028                          | 394.07             | 1193.38            | 3.690                          | 370.14             | 1365.71            |
| A_68_P32227660 | chr19:60950291-60950335                           | NM_007452:129          | Prdx3         | INSIDE                 | 1.218                                                        | 1.888                          | 3592.01            | 6780.73            | 2.300                          | 2633.46            | 6057.23            |
| A_68_P31868119 | chr18:81184645-81184689                           | NM_178280:-1349        | Sall3         | PROMOTER               | 1.218                                                        | 1.827                          | 659.62             | 1205.02            | 2.225                          | 516.93             | 1150.13            |
| A_68_P26084861 | chr8:98239992-98240036                            | NM_001035123:202       | Setd6         | INSIDE                 | 1.218                                                        | 2.990                          | 3190.57            | 9539.16            | 3.641                          | 2531.08            | 9214.92            |
| A_68_P25957631 | chr8:74108344-74108388                            | NM_011977:15541        | Slc27a1       | INSIDE                 | 1.218                                                        | 1.556                          | 575.66             | 895.51             | 1.894                          | 408.88             | 774.58             |
| A_68_P32147463 | chr19:47142891-47142935                           | NM_177342:675          | Taf5          | INSIDE                 | 1.218                                                        | 1.585                          | 565.84             | 897.04             | 1.931                          | 511.88             | 988.40             |
| A_68_P32557245 | chrX:97016277-97016321                            | NM_001081283:-109      | Tmem28        | PROMOTER               | 1.218                                                        | 2.729                          | 424.89             | 1159.72            | 3.325                          | 264.69             | 880.23             |
| A_68_P24777345 | chr6:116578587-116578631                          | NM_026057:387          | Zfp422        | INSIDE                 | 1.218                                                        | 1.363                          | 1560.09            | 2127.07            | 1.661                          | 1178.73            | 1958.03            |
| A_68_P23611946 | chr5:37554326-37554370                            | AK036147:261           |               | INSIDE                 | 1.218                                                        | 3.156                          | 715.66             | 2258.85            | 3.844                          | 653.45             | 2511.74            |
| A_68_P22312389 | chr3:88005037-88005081                            | ENSMUST00000167043:514 |               | INSIDE                 | 1.218                                                        | 3.674                          | 920.17             | 3380.42            | 4.476                          | 866.24             | 3876.91            |
| A_68_P29249239 | chr13:97841732-97841776                           | NM_001100458:157       | Fam169a       | INSIDE                 | 1.217                                                        | 1.529                          | 544.84             | 832.80             | 1.860                          | 511.23             | 950.80             |
| A_68_P26809635 | chr9:107473258-107473302                          | NM_010489:1787         | Hyal2         | INSIDE                 | 1.217                                                        | 2.344                          | 959.28             | 2248.38            | 2.852                          | 703.05             | 2005.23            |
| A_68_P24804559 | chr6:121423187-121423231                          | NM_001033354:488       | Iqsec3        | INSIDE                 | 1.217                                                        | 2.100                          | 466.46             | 979.71             | 2.557                          | 493.04             | 1260.74            |
| A_68_P31863853 | chr18:80560016-80560060                           | NM_001190373:955       | Keng2         | INSIDE                 | 1.217                                                        | 1.620                          | 1215.45            | 1968.48            | 1.970                          | 1088.15            | 2144.11            |
| A_68_P26144747 | chr8:109949061-109949105                          | NM_026277:-144         | Nob1          | PROMOTER               | 1.217                                                        | 2.368                          | 1208.29            | 2860.91            | 2.882                          | 1033.59            | 2978.72            |
| A_68_P27357768 | chr10:93610732-93610776                           | NM_011629:79           | Nr2c1         | INSIDE                 | 1.217                                                        | 1.752                          | 1829.57            | 3205.03            | 2.132                          | 1420.83            | 3029.79            |
| A_68_P27924779 | chr11:75008788-75008832                           | NM_177708:1316         | Rtn4r11       | INSIDE                 | 1.217                                                        | 1.578                          | 570.41             | 900.06             | 1.920                          | 488.48             | 937.69             |
| A_68_P25024912 | chr7:29805278-29805322                            | NM_009109:104870       | Ryr1          | INSIDE                 | 1.217                                                        | 2.133                          | 767.95             | 1638.34            | 2.596                          | 699.79             | 1816.35            |
| A_68_P27552578 | chr11:3435772-3435816                             | NM_001159284:3501      | Smtm          | INSIDE                 | 1.217                                                        | 2.168                          | 853.02             | 1849.67            | 2.640                          | 794.44             | 2097.06            |
| A_68_P26696148 | chr9:85737347-85737391                            | NM_001164792:910       | Tpbp          | INSIDE                 | 1.217                                                        | 2.215                          | 911.09             | 2017.91            | 2.694                          | 839.94             | 2263.20            |
| A_68_P23763266 | chr5:67067724-67067768                            | NM_011670:387          | Uchl1         | INSIDE                 | 1.217                                                        | 4.045                          | 1721.59            | 6962.99            | 4.921                          | 1280.87            | 6303.08            |
| A_68_P27563477 | chr11:5344468-5344513                             | NM_001080924:360       | Znrf3         | INSIDE                 | 1.217                                                        | 1.546                          | 1341.80            | 2074.88            | 1.881                          | 1209.54            | 2275.51            |
| A_68_P25097408 | chr7:53435337-53435381                            | NM_011510:45           | Abcc8         | INSIDE                 | 1.216                                                        | 1.856                          | 2952.84            | 5480.32            | 2.257                          | 2330.10            | 5258.56            |
| A_68_P26665701 | chr9:79566357-79566401                            | NM_007730:107          | Col12a1       | INSIDE                 | 1.216                                                        | 1.596                          | 2430.74            | 3880.54            | 1.942                          | 1980.78            | 3846.77            |
| A_68_P30579148 | chr16:18343878-18343922                           | NM_138583:125          | D16H22S680E   | INSIDE                 | 1.216                                                        | 1.339                          | 2497.85            | 3343.59            | 1.628                          | 2201.48            | 3583.74            |
| A_68_P31227863 | chr17:50432140-50432184                           | NM_010021:762          | Dazl          | INSIDE                 | 1.216                                                        | 1.362                          | 4813.80            | 6558.69            | 1.657                          | 3976.66            | 6588.76            |
| A_68_P32119984 | chr19:42330495-42330539                           | NM_027694:288          | Golga7b       | INSIDE                 | 1.216                                                        | 0.494                          | 1290.49            | 638.10             | 0.601                          | 1069.39            | 642.92             |
| A_68_P30021000 | chr15:12251385-12251429                           | NM_025673:156          | Golph3        | INSIDE                 | 1.216                                                        | 1.905                          | 727.77             | 1386.64            | 2.316                          | 729.80             | 1690.18            |
| A_68_P29363819 | chr13:118391652-118391696                         | NM_010408:548          | Hen1          | INSIDE                 | 1.216                                                        | 1.927                          | 1040.13            | 2004.48            | 2.343                          | 997.56             | 2337.07            |
| A_68_P24137556 | chr5:140251303-140251347                          | NM_026748:308          | Ints1         | INSIDE                 | 1.216                                                        | 0.473                          | 2140.77            | 1012.17            | 0.575                          | 1721.04            | 989.59             |
| A_68_P27922696 | chr11:74645200-74645244                           | NM_010813:797          | Mnt           | INSIDE                 | 1.216                                                        | 2.877                          | 680.70             | 1958.34            | 3.499                          | 740.74             | 2591.54            |
| A_68_P23523153 | chr5:20387713-20387757                            | NM_172992:208          | Phf2          | INSIDE                 | 1.216                                                        | 1.648                          | 1303.91            | 2149.11            | 2.004                          | 1272.49            | 2549.94            |
| A_68_P32118987 | chr19:42164891-42164935                           | NM_145501:-12          | Pi4k2a        | DIVERGENT_PROMOTER     | 1.216                                                        | 1.502                          | 1258.15            | 1889.56            | 1.827                          | 1113.07            | 2033.48            |
| A_68_P29648701 | chr14:61792097-61792141                           | NM_172809:34825        | Sacs          | INSIDE                 | 1.216                                                        | 1.769                          | 1343.37            | 2376.27            | 2.151                          | 1227.85            | 2641.07            |
| A_68_P25090603 | chr7:52263124-52263168                            | NM_001008422:8473      | Scafl1        | INSIDE                 | 1.216                                                        | 2.144                          | 741.55             | 1589.61            | 2.608                          | 576.21             | 1502.49            |
| A_68_P26887823 | chr9:122075943-122075987                          | NM_001164572:49581     | Snrk          | INSIDE                 | 1.216                                                        | 1.852                          | 1244.00            | 2304.39            | 2.252                          | 962.59             | 2167.89            |
| A_68_P30019344 | chr15:11925168-11925212                           | NM_011294:572          | Sub1          | INSIDE                 | 1.216                                                        | 1.948                          | 1157.79            | 2255.22            | 2.369                          | 959.97             | 2273.81            |
| A_68_P31209393 | chr17:47027920-47027964                           | NM_178385:373          | Tbcc          | INSIDE                 | 1.216                                                        | 2.067                          | 705.06             | 1457.22            | 2.514                          | 584.66             | 1469.91            |
| A_68_P24459355 | chr6:53770847-53770891                            | NM_025817:-49          | Tril          | PROMOTER               | 1.216                                                        | 1.561                          | 2820.71            | 4403.22            | 1.898                          | 2033.29            | 3858.81            |
| A_68_P22142065 | chr3:53282814-53282858                            | NM_173382:15098        | 2810046L04Rik | INSIDE                 | 1.215                                                        | 4.242                          | 6919.45            | 29351.52           | 5.153                          | 5009.68            | 25813.97           |
| A_68_P29049838 | chr13:54605642-54605686                           | NM_176987:499          | 4732471D19Rik | INSIDE                 | 1.215                                                        | 2.243                          | 677.44             | 1519.76            | 2.726                          | 635.08             | 1731.27            |
| A_68_P23154903 | chr4:101092599-101092643                          | NM_009647:313          | Ak4           | INSIDE                 | 1.215                                                        | 2.763                          | 3503.47            | 9678.66            | 3.358                          | 3174.14            | 10657.39           |
| A_68_P30357052 | chr15:77825727-77825771                           | NM_007583:123962       | Caeng2        | INSIDE                 | 1.215                                                        | 1.776                          | 826.86             | 1468.79            | 2.159                          | 594.32             | 1283.06            |
| A_68_P24040307 | chr5:121144585-121144629                          | NM_008052:17072        | Dtx1          | INSIDE                 | 1.215                                                        | 1.943                          | 542.80             | 1054.74            | 2.360                          | 448.67             | 1058.88            |
| A_68_P31928722 | chr19:5448027-5448071                             | NM_010235:351          | Fosl1         | INSIDE                 | 1.215                                                        | 1.594                          | 1667.83            | 2659.35            | 1.937                          | 1372.21            | 2658.55            |
| A_68_P24226580 | chr6:8460315-8460359                              | NM_133236:741          | Glecc1        | INSIDE                 | 1.215                                                        | 2.075                          | 1530.55            | 3175.74            | 2.522                          | 1327.77            | 3348.11            |
| A_68_P26467075 | chr9:44143629-44143673                            | NM_010436:853          | H2afx         | INSIDE                 | 1.215                                                        | 2.114                          | 1285.43            | 2717.19            | 2.568                          | 1028.36            | 2640.43            |

| ProbeName      | Target position of probe on CpG island microarray | TargetID                 | GeneSymbol    | CpG island Description | Ratio of relative methylation (TiO <sub>2</sub> -NP/Vehicle) | Sham group                     |                    |                    | TiO <sub>2</sub> -H group      |                    |                    |
|----------------|---------------------------------------------------|--------------------------|---------------|------------------------|--------------------------------------------------------------|--------------------------------|--------------------|--------------------|--------------------------------|--------------------|--------------------|
|                |                                                   |                          |               |                        |                                                              | Relative methylation (Cy5/Cy3) | Cy3 signal (Input) | Cy5 signal (MeDIP) | Relative methylation (Cy5/Cy3) | Cy3 signal (Input) | Cy5 signal (MeDIP) |
| A_68_P22603829 | chr3:144232802-144232849                          | NM_011828:355            | Hs2st1        | INSIDE                 | 1.215                                                        | 1.906                          | 1245.14            | 2373.51            | 2.316                          | 1107.93            | 2565.60            |
| A_68_P32465997 | chrX:71268691-71268735                            | NM_001177975:545         | Irak1         | INSIDE                 | 1.215                                                        | 1.954                          | 516.82             | 1009.72            | 2.374                          | 346.10             | 821.78             |
| A_68_P28099128 | chr11:105880140-105880184                         | NM_001037712:10646       | Kenh6         | INSIDE                 | 1.215                                                        | 1.598                          | 808.37             | 1291.42            | 1.942                          | 662.97             | 1287.23            |
| A_68_P31259699 | chr17:57171306-57171350                           | NM_010613:-398           | Khsrp         | PROMOTER               | 1.215                                                        | 1.414                          | 3773.68            | 5335.16            | 1.718                          | 2951.95            | 5072.48            |
| A_68_P27558539 | chr11:4494769-4494813                             | NM_028860:28             | Mtmr3         | INSIDE                 | 1.215                                                        | 2.817                          | 925.25             | 2606.01            | 3.423                          | 893.53             | 3058.31            |
| A_68_P29654922 | chr14:62951071-62951115                           | NM_026001:151            | Rnaseh2b      | INSIDE                 | 1.215                                                        | 1.929                          | 1085.90            | 2094.21            | 2.342                          | 927.31             | 2172.07            |
| A_68_P21311406 | chr2:69699566-69699610                            | NM_001110145:-30         | Ssb           | PROMOTER               | 1.215                                                        | 1.657                          | 1330.55            | 2204.31            | 2.014                          | 1081.60            | 2177.89            |
| A_68_P20804307 | chr11:169213914-169213958                         | NM_030724:1322           | Uck2          | INSIDE                 | 1.215                                                        | 1.487                          | 2282.46            | 3393.54            | 1.806                          | 2003.04            | 3617.56            |
| A_68_P25728007 | chr8:26712095-26712139                            | NM_001001735:-661        | Whsc111       | DIVERGENT_PROMOTER     | 1.215                                                        | 2.175                          | 764.67             | 1662.89            | 2.643                          | 689.20             | 1821.55            |
| A_68_P32369655 | chrX:47014344-47014388                            | ENSMUST00000121891:230   |               | INSIDE                 | 1.215                                                        | 1.793                          | 411.42             | 737.83             | 2.179                          | 257.78             | 561.62             |
| A_68_P29147535 | chr13:74946041-74946085                           | NM_009817:-693           | Cast          | PROMOTER               | 1.214                                                        | 2.119                          | 2732.05            | 5789.63            | 2.572                          | 2368.41            | 6090.97            |
| A_68_P31186625 | chr17:43013785-43013829                           | NM_009847:-433           | Cd2ap         | PROMOTER               | 1.214                                                        | 1.709                          | 1088.08            | 1859.39            | 2.074                          | 913.37             | 1894.27            |
| A_68_P26844378 | chr9:114293915-114293959                          | NM_019922:5894           | Crtap         | INSIDE                 | 1.214                                                        | 2.702                          | 590.24             | 1594.85            | 3.280                          | 494.84             | 1623.18            |
| A_68_P29628539 | chr14:58161485-58161529                           | NM_145837:17841          | Il17d         | INSIDE                 | 1.214                                                        | 2.918                          | 1027.70            | 2998.40            | 3.542                          | 990.17             | 3506.85            |
| A_68_P20168281 | chr11:39958327-39958371                           | NM_008696:591            | Map4k4        | INSIDE                 | 1.214                                                        | 1.487                          | 1182.43            | 1758.56            | 1.805                          | 992.43             | 1791.73            |
| A_68_P29330292 | chr13:112515172-112515216                         | NM_172593:38809          | Mier3         | DOWNSTREAM             | 1.214                                                        | 1.384                          | 1262.53            | 1747.10            | 1.680                          | 969.96             | 1629.70            |
| A_68_P25809390 | chr8:42218830-42218874                            | NM_001005863:228         | Mtus1         | INSIDE                 | 1.214                                                        | 1.551                          | 2016.19            | 3126.23            | 1.883                          | 1817.19            | 3421.10            |
| A_68_P23322026 | chr4:133842693-133842737                          | NM_001163794:454         | Pdik11        | INSIDE                 | 1.214                                                        | 1.965                          | 938.36             | 1844.12            | 2.385                          | 967.74             | 2308.52            |
| A_68_P30861550 | chr16:72663819-72663863                           | NM_019413:447            | Robo1         | INSIDE                 | 1.214                                                        | 1.608                          | 1630.32            | 2621.63            | 1.952                          | 1304.27            | 2545.63            |
| A_68_P21095249 | chr2:28980679-28980724                            | NM_198033:190            | Setx          | INSIDE                 | 1.214                                                        | 1.550                          | 557.70             | 864.59             | 1.882                          | 546.02             | 1027.61            |
| A_68_P24083090 | chr5:128938897-128938941                          | NM_172885:19             | Tmem132d      | INSIDE                 | 1.214                                                        | 2.527                          | 910.69             | 2301.06            | 3.069                          | 914.61             | 2806.50            |
| A_68_P31292453 | chr17:64213171-64213215                           | ENSMUST00000050753:-52   |               | DIVERGENT_PROMOTER     | 1.214                                                        | 2.671                          | 1169.59            | 3123.83            | 3.241                          | 1007.04            | 3264.13            |
| A_68_P21741661 | chr2:150730134-150730178                          | NM_024465:311            | Abhd12        | INSIDE                 | 1.213                                                        | 2.015                          | 1271.67            | 2562.23            | 2.444                          | 1093.83            | 2672.89            |
| A_68_P21438435 | chr2:93851039-93851083                            | NM_026944:-173           | Alkbh3        | PROMOTER               | 1.213                                                        | 2.163                          | 764.64             | 1653.54            | 2.624                          | 605.84             | 1589.68            |
| A_68_P30925872 | chr16:84835744-84835788                           | NM_016755:53             | Atp5j         | INSIDE                 | 1.213                                                        | 1.839                          | 525.84             | 966.88             | 2.231                          | 557.29             | 1243.15            |
| A_68_P21941976 | chr2:90729680-90729724                            | NM_026161:3760           | C1qtmf4       | INSIDE                 | 1.213                                                        | 0.463                          | 1193.16            | 551.85             | 0.561                          | 1003.74            | 563.11             |
| A_68_P26426473 | chr9:36533774-36533818                            | NM_007691:447            | Chek1         | INSIDE                 | 1.213                                                        | 1.364                          | 1897.82            | 2589.22            | 1.655                          | 1527.98            | 2529.17            |
| A_68_P29060387 | chr13:56397406-56397450                           | NM_019568:484            | Cxcl14        | INSIDE                 | 1.213                                                        | 1.686                          | 1021.51            | 1722.57            | 2.045                          | 971.78             | 1987.59            |
| A_68_P21374004 | chr2:80155781-80155825                            | NM_024181:180            | Dnajc10       | INSIDE                 | 1.213                                                        | 1.756                          | 2330.78            | 4092.81            | 2.130                          | 2039.39            | 4342.95            |
| A_68_P31097233 | chr17:24563466-24563510                           | NM_010023:-139           | Eci1          | PROMOTER               | 1.213                                                        | 2.568                          | 898.95             | 2308.29            | 3.115                          | 793.32             | 2471.08            |
| A_68_P24908778 | chr6:143116037-143116081                          | NM_029250:309            | Etnk1         | INSIDE                 | 1.213                                                        | 2.765                          | 730.28             | 2018.90            | 3.352                          | 614.99             | 2061.52            |
| A_68_P27930555 | chr11:76015561-76015605                           | NM_027773:25             | Fam57a        | INSIDE                 | 1.213                                                        | 1.859                          | 3970.10            | 7381.69            | 2.256                          | 3291.20            | 7424.16            |
| A_68_P31106390 | chr17:25946464-25946508                           | NM_001164225:457         | Fbx116        | INSIDE                 | 1.213                                                        | 1.667                          | 3314.97            | 5525.25            | 2.021                          | 2685.30            | 5427.25            |
| A_68_P29257124 | chr13:99124764-99124808                           | NM_008242:587            | Foxd1         | INSIDE                 | 1.213                                                        | 1.803                          | 2041.75            | 3680.27            | 2.186                          | 1641.97            | 3588.96            |
| A_68_P24112561 | chr5:134789297-134789341                          | NM_001080746:1298        | Gtf2i         | INSIDE                 | 1.213                                                        | 0.550                          | 1194.65            | 657.02             | 0.667                          | 1019.57            | 680.40             |
| A_68_P26020983 | chr8:87186771-87186818                            | NM_010499:-43            | Ier2          | PROMOTER               | 1.213                                                        | 1.382                          | 1896.58            | 2621.84            | 1.677                          | 1520.49            | 2549.89            |
| A_68_P27284096 | chr10:80039600-80039644                           | NM_078477:419            | Klfl6         | INSIDE                 | 1.213                                                        | 2.167                          | 1393.30            | 3019.67            | 2.629                          | 1153.65            | 3033.17            |
| A_68_P23657851 | chr5:46061284-46061329                            | NM_019438:143            | Ncapp         | INSIDE                 | 1.213                                                        | 1.742                          | 566.02             | 985.83             | 2.113                          | 476.62             | 1007.31            |
| A_68_P33012160 | chr9_random:55072-55116                           | NM_011154:-62            | Ppp2r3d       | PROMOTER               | 1.213                                                        | 3.675                          | 3654.69            | 13431.85           | 4.460                          | 2786.60            | 12427.65           |
| A_68_P30478003 | chr15:98887633-98887677                           | NM_001163588:2050        | Prph          | INSIDE                 | 1.213                                                        | 1.957                          | 730.48             | 1429.75            | 2.374                          | 537.81             | 1276.62            |
| A_68_P24061317 | chr5:124895849-124895893                          | NM_030241:5932           | Seid8         | INSIDE                 | 1.213                                                        | 1.415                          | 1452.31            | 2055.36            | 1.717                          | 1198.19            | 2057.02            |
| A_68_P27466129 | chr10:114238135-114238179                         | NM_146241:270            | Trhde         | INSIDE                 | 1.213                                                        | 1.844                          | 807.67             | 1489.00            | 2.237                          | 817.83             | 1829.36            |
| A_68_P27969172 | chr11:82744813-82744857                           | NM_178680:20080          | Unc45b        | INSIDE                 | 1.213                                                        | 2.008                          | 3402.11            | 6832.57            | 2.436                          | 2986.49            | 7276.05            |
| A_68_P28677276 | chr12:100866117-100866161                         | ENSMUST00000137842:64088 |               | DOWNSTREAM             | 1.213                                                        | 2.071                          | 457.34             | 947.17             | 2.512                          | 418.69             | 1051.83            |
| A_68_P20876218 | chr11:182413556-182413600                         | NM_001081227:57          | 6330403A02Rik | INSIDE                 | 1.212                                                        | 2.568                          | 721.17             | 1852.23            | 3.112                          | 593.47             | 1846.75            |
| A_68_P26595206 | chr9:66643069-66643113                            | NM_177583:140            | Aph1b         | INSIDE                 | 1.212                                                        | 1.438                          | 1281.51            | 1842.73            | 1.743                          | 1122.10            | 1955.36            |
| A_68_P28050945 | chr11:97362080-97362124                           | NM_021493:50629          | Arhgap23      | INSIDE                 | 1.212                                                        | 2.861                          | 701.92             | 2008.51            | 3.467                          | 634.80             | 2201.14            |
| A_68_P28724521 | chr12:109154706-109154750                         | NM_001079883:86896       | Bell1b        | INSIDE                 | 1.212                                                        | 2.803                          | 415.06             | 1163.41            | 3.398                          | 400.50             | 1361.00            |
| A_68_P31161463 | chr17:36016977-36017021                           | NM_026987:276            | Dhx16         | INSIDE                 | 1.212                                                        | 2.333                          | 789.17             | 1840.98            | 2.828                          | 812.59             | 2298.12            |
| A_68_P23342692 | chr4:137469822-137469866                          | NM_199307:51693          | Eec1          | INSIDE                 | 1.212                                                        | 1.580                          | 696.00             | 1099.95            | 1.915                          | 588.29             | 1126.84            |
| A_68_P27181452 | chr10:61088878-61088922                           | NM_001177511:30669       | Npffr1        | INSIDE                 | 1.212                                                        | 1.575                          | 804.23             | 1266.92            | 1.909                          | 662.94             | 1265.87            |

| ProbeName      | Target position of probe on CpG island microarray | TargetID                 | GeneSymbol    | CpG island Description | Ratio of relative methylation (TiO <sub>2</sub> -NP/Vehicle) | Sham group                     |                    |                    | TiO <sub>2</sub> -H group      |                    |                    |
|----------------|---------------------------------------------------|--------------------------|---------------|------------------------|--------------------------------------------------------------|--------------------------------|--------------------|--------------------|--------------------------------|--------------------|--------------------|
|                |                                                   |                          |               |                        |                                                              | Relative methylation (Cy5/Cy3) | Cy3 signal (Input) | Cy5 signal (MeDIP) | Relative methylation (Cy5/Cy3) | Cy3 signal (Input) | Cy5 signal (MeDIP) |
| A_68_P29589458 | chr14:49293418-49293462                           | NR_029384:4478           | Otx2os1       | INSIDE                 | 1.212                                                        | 1.884                          | 611.37             | 1151.77            | 2.283                          | 544.58             | 1243.36            |
| A_68_P32113657 | chr19:41281416-41281460                           | NM_011904:-174           | Tll2          | PROMOTER               | 1.212                                                        | 1.720                          | 1625.52            | 2795.99            | 2.085                          | 1519.56            | 3167.62            |
| A_68_P28593635 | chr12:84937847-84937891                           | NM_183154:229            | Zfyve1        | INSIDE                 | 1.212                                                        | 1.458                          | 1015.85            | 1480.99            | 1.768                          | 874.06             | 1544.95            |
| A_68_P31103786 | chr17:25571232-25571276                           | NM_001163691:-526        | Caena1h       | PROMOTER               | 1.211                                                        | 2.155                          | 1772.87            | 3823.35            | 2.610                          | 1745.59            | 3851.48            |
| A_68_P26822034 | chr9:110020069-110020113                          | NM_133347:-2004          | Dhx30         | PROMOTER               | 1.211                                                        | 1.750                          | 677.52             | 1185.81            | 2.119                          | 545.30             | 1155.61            |
| A_68_P31098856 | chr17:24987535-24987579                           | NM_001159626:-55         | Hagh          | PROMOTER               | 1.211                                                        | 2.844                          | 1136.89            | 3233.30            | 3.444                          | 948.52             | 3266.92            |
| A_68_P25264890 | chr7:87259796-87259840                            | NM_173011:418            | Idh2          | INSIDE                 | 1.211                                                        | 2.221                          | 7254.05            | 16113.71           | 2.690                          | 5105.30            | 13733.74           |
| A_68_P20285216 | chr1:63160901-63160945                            | NM_001081436:-81         | Ino80d        | PROMOTER               | 1.211                                                        | 2.238                          | 1355.93            | 3034.20            | 2.709                          | 1215.97            | 3294.23            |
| A_68_P24053338 | chr5:123438550-123438594                          | NM_001005866:-30         | Kdm2b         | PROMOTER               | 1.211                                                        | 1.770                          | 15591.49           | 27603.73           | 2.145                          | 10896.96           | 23371.47           |
| A_68_P20641807 | chr1:137715358-137715402                          | NM_133664:206            | Lad1          | INSIDE                 | 1.211                                                        | 1.868                          | 456.66             | 853.19             | 2.263                          | 426.36             | 965.01             |
| A_68_P26134881 | chr8:108138096-108138140                          | NR_035492:-1247          | Mir1966       | PROMOTER               | 1.211                                                        | 2.300                          | 1524.62            | 3507.30            | 2.786                          | 1216.70            | 3389.50            |
| A_68_P21006475 | chr2:11423041-11423085                            | NM_001177752:655         | Pfkfb3        | INSIDE                 | 1.211                                                        | 2.120                          | 2292.87            | 4860.41            | 2.567                          | 1992.15            | 5114.79            |
| A_68_P27287755 | chr10:80616237-80616281                           | NM_021501:14207          | Pias4         | DOWNSTREAM             | 1.211                                                        | 3.414                          | 959.62             | 3276.19            | 4.133                          | 777.76             | 3214.36            |
| A_68_P27469298 | chr10:114821572-114821616                         | NM_025780:-103           | Thap2         | DIVERGENT_PROMOTER     | 1.211                                                        | 1.721                          | 4851.98            | 8349.37            | 2.084                          | 4025.04            | 8389.94            |
| A_68_P26217893 | A_68_P26217893                                    |                          |               | Unknown                | 1.211                                                        | 2.282                          | 1996.67            | 4556.17            | 2.763                          | 1930.64            | 5334.78            |
| A_68_P28031039 | chr11:94010311-94010355                           | ENSMUST00000155965:15517 |               | INSIDE                 | 1.211                                                        | 1.452                          | 1984.94            | 2881.26            | 1.757                          | 1590.97            | 2795.89            |
| A_68_P21565892 | chr2:118572266-118572310                          | NR_030716:791            | 5430417L22Rik | INSIDE                 | 1.210                                                        | 0.404                          | 2818.48            | 1139.86            | 0.489                          | 1636.87            | 801.03             |
| A_68_P30434244 | chr15:91030048-91030092                           | NM_011994:-7832          | Abcd2         | PROMOTER               | 1.210                                                        | 2.404                          | 1423.99            | 3423.11            | 2.908                          | 1133.33            | 3295.15            |
| A_68_P20241456 | chr1:55420453-55420497                            | NM_029267:-161           | Boll          | PROMOTER               | 1.210                                                        | 1.560                          | 515.69             | 804.43             | 1.887                          | 491.67             | 927.74             |
| A_68_P24980698 | chr7:16881008-16881052                            | NM_001136471:-8886       | Ccdc9         | PROMOTER               | 1.210                                                        | 2.242                          | 1518.35            | 3403.93            | 2.713                          | 1309.25            | 3552.51            |
| A_68_P22889575 | chr4:46614883-46614927                            | NM_001164804:-103        | Coro2a        | PROMOTER               | 1.210                                                        | 3.004                          | 1884.05            | 5659.50            | 3.636                          | 1331.83            | 4841.95            |
| A_68_P25842219 | chr8:48618727-48618771                            | NM_177240:76             | D030016E14Rik | INSIDE                 | 1.210                                                        | 2.187                          | 1753.26            | 3834.54            | 2.647                          | 1577.35            | 4175.02            |
| A_68_P30364005 | chr15:78873228-78873272                           | NM_015738:936            | Galr3         | INSIDE                 | 1.210                                                        | 2.816                          | 647.24             | 1822.33            | 3.408                          | 585.40             | 1995.13            |
| A_68_P27087303 | chr10:40791899-40791943                           | NM_199058:-530           | Gpr6          | PROMOTER               | 1.210                                                        | 1.633                          | 992.17             | 1620.21            | 1.976                          | 872.03             | 1722.94            |
| A_68_P24156175 | chr5:144119353-144119397                          | NM_133355:-6212          | Grid2ip       | PROMOTER               | 1.210                                                        | 5.490                          | 5258.33            | 28868.55           | 6.646                          | 5041.27            | 33502.05           |
| A_68_P29138629 | chr13:73397900-73397944                           | NM_018885:-22            | Irx4          | PROMOTER               | 1.210                                                        | 2.940                          | 1412.02            | 4151.56            | 3.556                          | 1281.35            | 4557.11            |
| A_68_P21902329 | chr2:179960496-179960540                          | NM_001081171:46          | Lama5         | INSIDE                 | 1.210                                                        | 2.391                          | 1073.73            | 2567.44            | 2.893                          | 912.09             | 2639.11            |
| A_68_P28154416 | chr11:115473786-115473830                         | NM_027162:9              | Mif4gd        | INSIDE                 | 1.210                                                        | 2.950                          | 1262.79            | 3725.77            | 3.569                          | 1068.60            | 3814.23            |
| A_68_P31227302 | chr17:50329542-50329586                           | NM_181397:258            | Rfn1          | INSIDE                 | 1.210                                                        | 3.297                          | 1539.25            | 5075.30            | 3.991                          | 1407.06            | 5615.56            |
| A_68_P22317135 | chr3:88894988-88895032                            | NM_001083808:-1057       | Rusc1         | PROMOTER               | 1.210                                                        | 1.574                          | 2138.77            | 3365.96            | 1.905                          | 1700.57            | 3238.87            |
| A_68_P25090607 | chr7:52263642-52263686                            | NM_001008422:7955        | Scafl         | INSIDE                 | 1.210                                                        | 1.532                          | 774.04             | 1185.85            | 1.853                          | 605.87             | 1122.84            |
| A_68_P21707841 | chr2:144382255-144382299                          | NM_019787:264            | Sec23b        | INSIDE                 | 1.210                                                        | 3.903                          | 1293.78            | 5049.14            | 4.724                          | 963.28             | 4550.43            |
| A_68_P30651947 | chr16:32333125-32333169                           | NM_177633:809            | Ubxn7         | INSIDE                 | 1.210                                                        | 3.221                          | 437.20             | 1408.30            | 3.897                          | 433.52             | 1689.37            |
| A_68_P32039606 | chr19:27293512-27293556                           | NM_001161420:2025        | Vldlr         | INSIDE                 | 1.210                                                        | 1.516                          | 1207.62            | 1830.62            | 1.834                          | 894.67             | 1640.91            |
| A_68_P23938661 | chr5:102498072-102498116                          | NM_172882:846            | Wdfy3         | INSIDE                 | 1.210                                                        | 1.857                          | 557.00             | 1034.33            | 2.246                          | 478.19             | 1074.16            |
| A_68_P25844871 | chr8:49075873-49075917                            | NM_133791:11             | Wwc2          | INSIDE                 | 1.210                                                        | 1.721                          | 828.75             | 1425.91            | 2.081                          | 699.20             | 1455.14            |
| A_68_P33005807 | A_68_P33005807                                    |                          |               | Unknown                | 1.210                                                        | 3.543                          | 902.80             | 3198.78            | 4.287                          | 789.06             | 3382.59            |
| A_68_P31019377 | A_68_P31019377                                    |                          |               | Unknown                | 1.210                                                        | 2.532                          | 255.63             | 647.25             | 3.064                          | 242.82             | 743.88             |
| A_68_P29848865 | chr14:100684720-100684764                         | AK021307:-1136           |               | PROMOTER               | 1.210                                                        | 1.771                          | 1294.44            | 2292.44            | 2.143                          | 1027.10            | 2200.77            |
| A_68_P28275058 | chr12:19181894-19181939                           | BC012645:412612          |               | INSIDE                 | 1.210                                                        | 2.183                          | 28311.06           | 61795.69           | 2.642                          | 22174.70           | 58588.32           |
| A_68_P23435929 | chr4:154417040-154417084                          | ENSMUST00000135665:201   |               | INSIDE                 | 1.210                                                        | 1.651                          | 723.71             | 1194.90            | 1.998                          | 663.70             | 1326.21            |
| A_68_P27473559 | chr10:115551010-115551054                         | NM_001161855:-59         | 4933416C03Rik | PROMOTER               | 1.209                                                        | 2.550                          | 1628.90            | 4153.49            | 3.084                          | 1336.31            | 4121.08            |
| A_68_P27804987 | chr11:53292850-53292894                           | NM_183173:825            | Ankrd43       | INSIDE                 | 1.209                                                        | 5.455                          | 270.63             | 1476.23            | 6.595                          | 264.40             | 1743.64            |
| A_68_P27083519 | chr10:40068940-40068984                           | NM_001168304:-151        | Cdk19         | PROMOTER               | 1.209                                                        | 1.484                          | 1031.52            | 1530.91            | 1.794                          | 818.88             | 1468.75            |
| A_68_P29060392 | chr13:56397929-56397973                           | NM_019568:-38            | Cxcl14        | PROMOTER               | 1.209                                                        | 3.247                          | 15148.05           | 49182.02           | 3.926                          | 10128.64           | 39765.74           |
| A_68_P23541891 | chr5:23951016-23951060                            | NM_023229:15             | Fastk         | INSIDE                 | 1.209                                                        | 2.456                          | 822.35             | 2019.51            | 2.970                          | 758.13             | 2251.79            |
| A_68_P25265269 | chr7:87343641-87343685                            | NM_013659:11936          | Sema4b        | INSIDE                 | 1.209                                                        | 2.280                          | 2248.75            | 5126.41            | 2.755                          | 1818.43            | 5010.02            |
| A_68_P29512056 | chr14:32249107-32249151                           | NM_011894:91             | Sh3bp5        | INSIDE                 | 1.209                                                        | 1.919                          | 380.32             | 729.82             | 2.321                          | 318.48             | 739.05             |
| A_68_P32775569 | chrX:156065756-156065800                          | NM_001135727:439         | Sh3kbp1       | INSIDE                 | 1.209                                                        | 1.410                          | 1561.88            | 2202.85            | 1.705                          | 702.29             | 1197.31            |
| A_68_P27138493 | chr10:52410426-52410470                           | NM_178675:142            | Slc35f1       | INSIDE                 | 1.209                                                        | 3.200                          | 2916.10            | 9331.08            | 3.869                          | 2239.55            | 8664.61            |
| A_68_P23801182 | chr5:74489320-74489364                            | NR_031758:-212           | Snora26       | PROMOTER               | 1.209                                                        | 1.452                          | 2144.70            | 3113.99            | 1.755                          | 1872.65            | 3285.93            |

| ProbeName      | Target position of probe on CpG island microarray | TargetID           | GeneSymbol    | CpG island Description | Ratio of relative methylation (TiO <sub>2</sub> -NP/Vehicle) | Sham group                     |                    |                    | TiO <sub>2</sub> -H group      |                    |                    |
|----------------|---------------------------------------------------|--------------------|---------------|------------------------|--------------------------------------------------------------|--------------------------------|--------------------|--------------------|--------------------------------|--------------------|--------------------|
|                |                                                   |                    |               |                        |                                                              | Relative methylation (Cy5/Cy3) | Cy3 signal (Input) | Cy5 signal (MeDIP) | Relative methylation (Cy5/Cy3) | Cy3 signal (Input) | Cy5 signal (MeDIP) |
| A_68_P21900382 | chr2:179666703-179666747                          | NM_001081092:44627 | Taf4a         | INSIDE                 | 1.209                                                        | 3.692                          | 580.06             | 2141.42            | 4.464                          | 546.36             | 2438.88            |
| A_68_P29919369 | A_68_P29919369                                    |                    |               | Unknown                | 1.209                                                        | 2.929                          | 205.40             | 601.66             | 3.542                          | 138.16             | 489.39             |
| A_68_P24513207 | chr6:65622605-65622649                            | NM_172399:1022     | A930038C07Rik | INSIDE                 | 1.208                                                        | 1.483                          | 2336.85            | 3466.32            | 1.792                          | 1795.97            | 3219.23            |
| A_68_P23897550 | chr5:93473495-93473539                            | NM_175270:532      | Ankrd56       | INSIDE                 | 1.208                                                        | 1.720                          | 1966.63            | 3381.90            | 2.077                          | 1634.43            | 3394.44            |
| A_68_P24172968 | chr5:148116746-148116790                          | NM_007673:2057     | Cdk2          | INSIDE                 | 1.208                                                        | 1.434                          | 1086.45            | 1558.01            | 1.733                          | 932.64             | 1616.02            |
| A_68_P31694860 | chr18:49992722-49992766                           | NM_001081371:78    | Dmxi1         | INSIDE                 | 1.208                                                        | 1.585                          | 483.46             | 766.18             | 1.914                          | 673.09             | 1288.30            |
| A_68_P24334780 | chr6:30908766-30908810                            | NM_001135093:202   | Klfl4         | INSIDE                 | 1.208                                                        | 4.077                          | 338.89             | 1381.55            | 4.924                          | 339.69             | 1672.63            |
| A_68_P24443356 | chr6:51221246-51221290                            | NR_029719:-1359    | Mir148a       | PROMOTER               | 1.208                                                        | 2.358                          | 470.13             | 1108.49            | 2.848                          | 435.21             | 1239.41            |
| A_68_P31157234 | chr17:35183191-35183235                           | NM_013600:339      | Msh5          | INSIDE                 | 1.208                                                        | 2.753                          | 972.47             | 2676.94            | 3.327                          | 834.02             | 2774.41            |
| A_68_P30363152 | chr15:78744712-78744756                           | NM_020271:386      | Pdpx          | INSIDE                 | 1.208                                                        | 4.206                          | 844.10             | 3550.39            | 5.081                          | 772.17             | 3923.59            |
| A_68_P29055223 | chr13:55573203-55573247                           | NM_001030296:7597  | Prr7          | INSIDE                 | 1.208                                                        | 1.695                          | 3482.14            | 5903.44            | 2.048                          | 3195.29            | 6544.11            |
| A_68_P31227303 | chr17:50329691-50329735                           | NM_181397:110      | Rfn1          | INSIDE                 | 1.208                                                        | 1.540                          | 1156.27            | 1780.47            | 1.861                          | 1041.43            | 1937.95            |
| A_68_P26823386 | chr9:110283633-110283677                          | NM_001001144:47858 | Scap          | INSIDE                 | 1.208                                                        | 2.701                          | 3742.13            | 10105.67           | 3.263                          | 2934.74            | 9574.77            |
| A_68_P30425918 | chr15:89388530-89388574                           | NM_021423:58265    | Shank3        | INSIDE                 | 1.208                                                        | 1.421                          | 945.84             | 1344.26            | 1.716                          | 779.53             | 1337.99            |
| A_68_P26822092 | chr9:110034844-110034888                          | NM_009211:339      | Smarrc1       | INSIDE                 | 1.208                                                        | 1.539                          | 1277.09            | 1964.84            | 1.858                          | 1241.54            | 2307.05            |
| A_68_P29937468 | chr14:118633821-118633865                         | NM_177753:2410     | Sox21         | INSIDE                 | 1.208                                                        | 1.399                          | 4476.06            | 6261.92            | 1.689                          | 3426.76            | 5789.21            |
| A_68_P22825734 | chr4:33296280-33296324                            | NM_177774:337      | Srsf12        | INSIDE                 | 1.208                                                        | 3.249                          | 1547.76            | 5029.04            | 3.925                          | 1319.07            | 5177.96            |
| A_68_P27187528 | chr10:62188471-62188515                           | NM_001033260:355   | Stox1         | INSIDE                 | 1.208                                                        | 3.141                          | 1315.43            | 4132.20            | 3.795                          | 1190.73            | 4519.24            |
| A_68_P31260743 | chr17:57390196-57390242                           | NM_134125:1345     | Trip10        | INSIDE                 | 1.208                                                        | 1.805                          | 318.17             | 574.32             | 2.180                          | 310.56             | 676.97             |
| A_68_P30453204 | chr15:94420006-94420050                           | NM_008971:227      | Twfl          | INSIDE                 | 1.208                                                        | 2.659                          | 2003.30            | 5327.44            | 3.214                          | 1751.51            | 5628.69            |
| A_68_P25411548 | chr7:117205451-117205495                          | NM_009281:257      | Zfp143        | INSIDE                 | 1.208                                                        | 1.727                          | 440.26             | 760.22             | 2.087                          | 352.21             | 734.98             |
| A_68_P20184572 | chr1:42741537-42741581                            | NR_027826:10112    | 261001709Rik  | INSIDE                 | 1.207                                                        | 1.596                          | 4694.31            | 7490.19            | 1.926                          | 3365.88            | 6482.10            |
| A_68_P28432829 | chr12:53107422-53107466                           | NM_029545:44       | 6530401N04Rik | INSIDE                 | 1.207                                                        | 1.922                          | 2211.06            | 4250.74            | 2.320                          | 1858.65            | 4311.98            |
| A_68_P26617800 | chr9:70526556-70526600                            | NM_007399:-229     | Adam10        | PROMOTER               | 1.207                                                        | 1.603                          | 884.87             | 1418.57            | 1.935                          | 833.21             | 1612.13            |
| A_68_P27282385 | chr10:79775990-79776034                           | NM_011789:11448    | Apc2          | INSIDE                 | 1.207                                                        | 3.154                          | 1399.50            | 4414.39            | 3.808                          | 1096.28            | 4174.19            |
| A_68_P20456915 | chr1:95582543-95582587                            | NM_016778:294      | Bok           | INSIDE                 | 1.207                                                        | 0.410                          | 1341.70            | 549.63             | 0.494                          | 1081.27            | 534.44             |
| A_68_P24000794 | chr5:114358647-114358691                          | NM_011779:47       | Coro1c        | INSIDE                 | 1.207                                                        | 2.767                          | 1982.64            | 5485.08            | 3.339                          | 1802.46            | 6017.90            |
| A_68_P20383169 | chr1:80754785-80754829                            | NM_175291:322      | Dock10        | INSIDE                 | 1.207                                                        | 0.430                          | 1340.73            | 575.89             | 0.519                          | 1067.11            | 553.45             |
| A_68_P21113209 | chr2:31939133-31939177                            | NM_175511:71       | Fam78a        | INSIDE                 | 1.207                                                        | 1.740                          | 1448.64            | 2520.25            | 2.101                          | 1131.20            | 2376.28            |
| A_68_P27286395 | chr10:80391635-80391679                           | NM_008655:-1179    | Gadd45b       | PROMOTER               | 1.207                                                        | 0.490                          | 1172.23            | 574.50             | 0.592                          | 1005.25            | 594.86             |
| A_68_P28989506 | chr13:43399105-43399149                           | NM_001033399:415   | Gfod1         | INSIDE                 | 1.207                                                        | 2.520                          | 390.30             | 983.69             | 3.043                          | 356.18             | 1083.82            |
| A_68_P27279738 | chr10:79384372-79384416                           | NM_053244:4679     | Kiss1r        | INSIDE                 | 1.207                                                        | 1.419                          | 1165.95            | 1655.02            | 1.714                          | 909.30             | 1558.27            |
| A_68_P31475770 | chr18:7004914-7004958                             | NM_177595:-159     | Mkx           | PROMOTER               | 1.207                                                        | 1.835                          | 1192.33            | 2188.08            | 2.216                          | 1074.98            | 2381.95            |
| A_68_P24990783 | chr7:19576629-19576673                            | NM_145579:57       | Mypop         | INSIDE                 | 1.207                                                        | 1.422                          | 1419.62            | 2018.55            | 1.717                          | 1119.76            | 1922.35            |
| A_68_P24428193 | chr6:48544163-48544207                            | NM_001079901:303   | Repin1        | INSIDE                 | 1.207                                                        | 2.575                          | 964.64             | 2484.34            | 3.107                          | 904.20             | 2809.72            |
| A_68_P26129565 | chr8:107154553-107154597                          | NM_019662:647      | Rrad          | INSIDE                 | 1.207                                                        | 1.390                          | 1404.33            | 1952.16            | 1.678                          | 1122.45            | 1883.78            |
| A_68_P28187710 | chr11:120810691-120810735                         | NM_001038653:332   | Slc16a3       | INSIDE                 | 1.207                                                        | 1.707                          | 1225.51            | 2092.38            | 2.061                          | 974.29             | 2008.14            |
| A_68_P28550363 | chr12:76919145-76919189                           | NM_001005510:-138  | Syme2         | PROMOTER               | 1.207                                                        | 1.708                          | 609.14             | 1040.52            | 2.061                          | 561.50             | 1157.31            |
| A_68_P24061812 | chr5:124990693-124990737                          | NM_019770:-85      | Tmed2         | DIVERGENT_PROMOTER     | 1.207                                                        | 2.616                          | 542.07             | 1417.98            | 3.158                          | 522.03             | 1648.36            |
| A_68_P24951465 | chr7:4946322-4946366                              | NM_026741:1359     | Zfp579        | INSIDE                 | 1.207                                                        | 4.924                          | 2513.06            | 12375.01           | 5.946                          | 1889.30            | 11233.07           |
| A_68_P25947784 | chr8:72240592-72240636                            | NM_181274:-229     | Zfp869        | PROMOTER               | 1.207                                                        | 1.837                          | 1966.78            | 3612.26            | 2.217                          | 1810.30            | 4012.74            |
| A_68_P24050007 | chr5:122822159-122822211                          | NM_026883:-212     | 1500011H22Rik | DIVERGENT_PROMOTER     | 1.206                                                        | 2.053                          | 780.57             | 1602.90            | 2.476                          | 681.98             | 1688.26            |
| A_68_P30478228 | chr15:98928659-98928703                           | NM_176835:-1234    | Dnajc22       | PROMOTER               | 1.206                                                        | 2.299                          | 897.95             | 2064.41            | 2.773                          | 824.16             | 2285.22            |
| A_68_P23796632 | chr5:73647376-73647420                            | NM_028194:459      | Fryl          | INSIDE                 | 1.206                                                        | 1.984                          | 841.94             | 1670.48            | 2.392                          | 839.41             | 2008.04            |
| A_68_P27271932 | chr10:77532109-77532153                           | NM_015790:18       | Icosl         | INSIDE                 | 1.206                                                        | 1.418                          | 1348.92            | 1912.53            | 1.709                          | 1009.89            | 1726.26            |
| A_68_P32028431 | chr19:25312079-25312123                           | NM_181404:409      | Kank1         | INSIDE                 | 1.206                                                        | 1.823                          | 499.82             | 910.94             | 2.198                          | 409.07             | 899.05             |
| A_68_P24333873 | chr6:30688134-30688178                            | NR_029900:-3142    | Mir335        | PROMOTER               | 1.206                                                        | 1.587                          | 712.42             | 1130.79            | 1.914                          | 629.86             | 1205.73            |
| A_68_P30681786 | chr16:37654577-37654621                           | NM_026610:-144     | Ndufb4        | PROMOTER               | 1.206                                                        | 1.454                          | 1249.36            | 1816.82            | 1.754                          | 1077.66            | 1889.79            |
| A_68_P26137546 | chr8:108583679-108583723                          | NM_010901:198      | Nfatc3        | INSIDE                 | 1.206                                                        | 1.683                          | 375.65             | 632.26             | 2.030                          | 367.52             | 746.12             |
| A_68_P29350211 | chr13:115880342-115880386                         | NM_134058:2        | Pelo          | INSIDE                 | 1.206                                                        | 2.189                          | 1298.94            | 2842.80            | 2.639                          | 1143.00            | 3015.91            |
| A_68_P24046797 | chr5:122286984-122287028                          | NM_008507:-196     | Sh2b3         | PROMOTER               | 1.206                                                        | 2.268                          | 937.38             | 2125.58            | 2.734                          | 884.39             | 2417.72            |

| ProbeName      | Target position of probe on CpG island microarray | TargetID               | GeneSymbol    | CpG island Description | Ratio of relative methylation (TiO <sub>2</sub> -NP/Vehicle) | Sham group                     |                    |                    | TiO <sub>2</sub> -H group      |                    |                    |
|----------------|---------------------------------------------------|------------------------|---------------|------------------------|--------------------------------------------------------------|--------------------------------|--------------------|--------------------|--------------------------------|--------------------|--------------------|
|                |                                                   |                        |               |                        |                                                              | Relative methylation (Cy5/Cy3) | Cy3 signal (Input) | Cy5 signal (MeDIP) | Relative methylation (Cy5/Cy3) | Cy3 signal (Input) | Cy5 signal (MeDIP) |
| A_68_P23991346 | chr5:112737009-112737053                          | NM_009419:31304        | Tpst2         | INSIDE                 | 1.206                                                        | 1.844                          | 2178.30            | 4017.56            | 2.224                          | 1731.64            | 3850.95            |
| A_68_P30176278 | chr15:43309169-43309213                           | NM_025736:416          | Ttc35         | INSIDE                 | 1.206                                                        | 11.506                         | 2959.95            | 34057.52           | 13.876                         | 2316.18            | 32140.01           |
| A_68_P21047273 | chr2:19831293-19831337                            | ENSMUST00000114610:-92 |               | PROMOTER               | 1.206                                                        | 4.426                          | 4936.41            | 21846.20           | 5.335                          | 3571.91            | 19057.88           |
| A_68_P23364695 | chr4:141101558-141101602                          | NR_030695:496          | B330016D10Rik | DIVERGENT_PROMOTER     | 1.205                                                        | 1.858                          | 1020.09            | 1895.39            | 2.239                          | 931.31             | 2084.81            |
| A_68_P24120336 | chr5:136750661-136750705                          | NM_198602:292593       | Cux1          | INSIDE                 | 1.205                                                        | 2.752                          | 433.57             | 1193.27            | 3.317                          | 439.37             | 1457.35            |
| A_68_P20660113 | chr1:140860423-140860467                          | NM_181347:-3853        | Dennd1b       | PROMOTER               | 1.205                                                        | 3.266                          | 647.57             | 2114.75            | 3.934                          | 629.41             | 2476.36            |
| A_68_P21319994 | chr2:71367531-71367575                            | NM_010053:51           | Dlx1          | INSIDE                 | 1.205                                                        | 1.660                          | 7033.80            | 11673.78           | 2.000                          | 6150.28            | 12300.98           |
| A_68_P28577471 | chr12:81858975-81859019                           | NM_001008423:2706      | Gm1568        | INSIDE                 | 1.205                                                        | 2.435                          | 413.84             | 1007.83            | 2.935                          | 368.66             | 1082.17            |
| A_68_P22565467 | chr3:137527631-137527675                          | NM_016750:90           | H2afz         | INSIDE                 | 1.205                                                        | 2.434                          | 971.95             | 2365.24            | 2.932                          | 805.68             | 2362.05            |
| A_68_P27495310 | chr10:119542700-119542745                         | NM_080446:7299         | Helb          | INSIDE                 | 1.205                                                        | 2.602                          | 278.34             | 724.37             | 3.137                          | 280.18             | 878.96             |
| A_68_P21908761 | chr2:180869735-180869779                          | NM_001003824:174       | Kenq2         | INSIDE                 | 1.205                                                        | 1.570                          | 496.64             | 779.92             | 1.893                          | 465.00             | 880.09             |
| A_68_P24333876 | chr6:30688404-30688448                            | NR_029900:2872         | Mir335        | PROMOTER               | 1.205                                                        | 3.232                          | 1916.77            | 6194.18            | 3.895                          | 1405.29            | 5473.62            |
| A_68_P25588916 | chr7:148641001-148641045                          | NM_001163689:-64       | Pnpla2        | PROMOTER               | 1.205                                                        | 1.681                          | 1026.23            | 1725.53            | 2.026                          | 791.87             | 1604.40            |
| A_68_P23921376 | chr5:99466286-99466330                            | NM_008926:-210         | Prkg2         | PROMOTER               | 1.205                                                        | 1.426                          | 1398.71            | 1994.05            | 1.718                          | 1254.18            | 2154.94            |
| A_68_P31868010 | chr18:81171392-81171436                           | NM_178280:11903        | Sall3         | INSIDE                 | 1.205                                                        | 3.097                          | 1061.96            | 3289.01            | 3.733                          | 1010.19            | 3771.19            |
| A_68_P25805590 | chr8:41509132-41509176                            | NM_178395:-14          | Zdhhc2        | PROMOTER               | 1.205                                                        | 4.513                          | 663.48             | 2994.06            | 5.436                          | 694.49             | 3775.25            |
| A_68_P24973911 | chr7:13556484-13556528                            | NM_178732:5294         | Zfp324        | INSIDE                 | 1.205                                                        | 5.259                          | 2625.33            | 13807.29           | 6.336                          | 2500.36            | 15842.21           |
| A_68_P31939719 | chr19:7496867-7496911                             | NM_175381:4774         | 2700081O15Rik | INSIDE                 | 1.204                                                        | 3.596                          | 2149.64            | 7729.16            | 4.330                          | 1843.47            | 7981.71            |
| A_68_P26158882 | chr8:112302510-112302554                          | NM_009677:-7           | Ap1g1         | PROMOTER               | 1.204                                                        | 2.368                          | 1138.42            | 2695.58            | 2.851                          | 981.29             | 2797.89            |
| A_68_P23979252 | chr5:110792613-110792657                          | NM_028596:23512        | Fbrs11        | INSIDE                 | 1.204                                                        | 1.543                          | 1002.79            | 1547.66            | 1.859                          | 859.18             | 1596.97            |
| A_68_P23248723 | chr4:119705546-119705590                          | NM_010657:218286       | Hivep3        | INSIDE                 | 1.204                                                        | 2.857                          | 1045.25            | 2986.40            | 3.440                          | 953.42             | 3279.53            |
| A_68_P30511776 | chr16:4726510-4726554                             | NM_001136066:172       | Hmox2         | INSIDE                 | 1.204                                                        | 1.684                          | 875.43             | 1474.02            | 2.027                          | 709.15             | 1437.15            |
| A_68_P30956553 | chr16:90386404-90386448                           | NM_015755:-215         | Hunk          | PROMOTER               | 1.204                                                        | 1.462                          | 1047.74            | 1531.37            | 1.759                          | 927.71             | 1632.30            |
| A_68_P27109368 | chr10:44786970-44787014                           | NM_011156:-27          | Prep          | PROMOTER               | 1.204                                                        | 1.724                          | 1058.95            | 1826.06            | 2.076                          | 912.49             | 1893.90            |
| A_68_P32583451 | chrX:103414842-103414886                          | NM_001001176:317       | Taf9b         | INSIDE                 | 1.204                                                        | 1.674                          | 577.58             | 966.85             | 2.016                          | 326.37             | 657.81             |
| A_68_P31936612 | chr19:6984205-6984249                             | NM_001166370:39        | Trmt112       | INSIDE                 | 1.204                                                        | 1.955                          | 1393.20            | 2723.52            | 2.353                          | 1313.17            | 3090.40            |
| A_68_P26885417 | chr9:121672235-121672279                          | NM_001166644:3106      | Zfp651        | INSIDE                 | 1.204                                                        | 1.875                          | 480.33             | 900.61             | 2.258                          | 441.82             | 997.64             |
| A_68_P25579476 | chr7:146846040-146846084                          | ENSMUST00000118750:-8  |               | PROMOTER               | 1.204                                                        | 2.417                          | 2631.11            | 6360.44            | 2.909                          | 2065.82            | 6010.26            |
| A_68_P21079933 | chr2:26459306-26459350                            | NM_026212:402          | Agpat2        | INSIDE                 | 1.203                                                        | 1.892                          | 656.03             | 1241.32            | 2.277                          | 605.01             | 1377.37            |
| A_68_P20975262 | chr2:5635173-5635217                              | NM_177343:516          | Camk1d        | INSIDE                 | 1.203                                                        | 5.198                          | 1437.93            | 7474.26            | 6.253                          | 1158.72            | 7245.33            |
| A_68_P28745355 | chr12:112910496-112910540                         | NM_021273:31           | Ckb           | INSIDE                 | 1.203                                                        | 2.306                          | 1940.40            | 4474.67            | 2.773                          | 1519.96            | 4215.19            |
| A_68_P20258855 | chr1:58480898-58480942                            | NM_001042634:12        | Clk1          | INSIDE                 | 1.203                                                        | 1.725                          | 1869.07            | 3224.53            | 2.076                          | 1666.37            | 3458.95            |
| A_68_P25268092 | chr7:87833284-87833328                            | NM_173863:457          | Crtc3         | INSIDE                 | 1.203                                                        | 2.888                          | 1369.27            | 3954.51            | 3.475                          | 1189.59            | 4133.44            |
| A_68_P23415470 | chr4:151308129-151308173                          | NM_172704:322          | Dnajc11       | INSIDE                 | 1.203                                                        | 2.195                          | 442.74             | 971.92             | 2.641                          | 370.30             | 978.07             |
| A_68_P25596358 | chr7:149845220-149845264                          | NR_002855:-355         | Igf2as        | DIVERGENT_PROMOTER     | 1.203                                                        | 2.933                          | 1135.39            | 3330.63            | 3.528                          | 965.24             | 3405.49            |
| A_68_P25952869 | chr8:73118953-73118997                            | NM_023627:595          | Isyna1        | INSIDE                 | 1.203                                                        | 2.305                          | 1975.31            | 4554.06            | 2.773                          | 1604.48            | 4450.01            |
| A_68_P23588237 | chr5:33678644-33678688                            | NM_021500:446          | Maea          | INSIDE                 | 1.203                                                        | 4.465                          | 1242.80            | 5549.32            | 5.371                          | 1051.07            | 5645.77            |
| A_68_P23978674 | chr5:110698757-110698801                          | NM_001163538:140       | Pgam5         | INSIDE                 | 1.203                                                        | 2.077                          | 828.18             | 1720.26            | 2.500                          | 694.43             | 1735.81            |
| A_68_P31254024 | chr17:56264131-56264175                           | NM_013662:9123         | Sema6b        | INSIDE                 | 1.203                                                        | 2.478                          | 2592.56            | 6425.25            | 2.981                          | 1974.26            | 5884.48            |
| A_68_P27095211 | chr10:42222280-42222324                           | NM_017472:443          | Snx3          | INSIDE                 | 1.203                                                        | 2.859                          | 1344.03            | 3842.41            | 3.439                          | 1300.70            | 4472.92            |
| A_68_P26163688 | chr8:113142314-113142358                          | NM_146216:-201         | Vac14         | PROMOTER               | 1.203                                                        | 2.251                          | 1513.09            | 3406.72            | 2.709                          | 1273.76            | 3451.24            |
| A_68_P25499302 | chr7:133343826-133343870                          | NM_028816:74           | Xpo6          | INSIDE                 | 1.203                                                        | 1.465                          | 777.14             | 1138.55            | 1.763                          | 858.23             | 1513.19            |
| A_68_P31144038 | A_68_P31144038                                    |                        |               | Unknown                | 1.203                                                        | 2.582                          | 568.68             | 1468.28            | 3.105                          | 478.04             | 1484.52            |
| A_68_P31159052 | chr17:35496088-35496132                           | M19687:92295           |               |                        | 1.203                                                        | 3.619                          | 3325.24            | 12035.17           | 4.353                          | 2816.53            | 12261.71           |
| A_68_P28573972 | chr12:81233698-81233742                           | NR_033514:111          | 2310015A10Rik | INSIDE                 | 1.202                                                        | 2.767                          | 587.25             | 1624.69            | 3.327                          | 515.19             | 1713.80            |
| A_68_P28181737 | chr11:119873242-119873286                         | NM_001198787:29831     | Aatk          | INSIDE                 | 1.202                                                        | 2.499                          | 988.52             | 2469.91            | 3.003                          | 803.88             | 2414.16            |
| A_68_P22411290 | chr3:108013838-108013882                          | NM_175183:-8           | Atxn7l2       | PROMOTER               | 1.202                                                        | 2.468                          | 1955.92            | 4827.76            | 2.966                          | 1551.88            | 4602.91            |
| A_68_P27275481 | chr10:78215248-78215292                           | NM_027630:542          | Ccdc105       | INSIDE                 | 1.202                                                        | 2.253                          | 489.86             | 1103.46            | 2.708                          | 424.64             | 1149.89            |
| A_68_P26674982 | chr9:81526714-81526758                            | NM_010482:-577         | Htr1b         | PROMOTER               | 1.202                                                        | 1.528                          | 944.96             | 1443.82            | 1.837                          | 822.85             | 1511.50            |
| A_68_P28161572 | chr11:116704633-116704677                         | NM_033398:109          | Jmjd6         | INSIDE                 | 1.202                                                        | 2.083                          | 2133.37            | 4443.18            | 2.503                          | 1716.89            | 4298.09            |
| A_68_P30114903 | chr15:31460728-31460772                           | NM_172606:42           | Marchf6       | INSIDE                 | 1.202                                                        | 1.560                          | 2000.26            | 3121.15            | 1.876                          | 1724.98            | 3236.31            |

| ProbeName       | Target position of probe on CpG island microarray | TargetID           | GeneSymbol    | CpG island Description | Ratio of relative methylation (TiO <sub>2</sub> -NP/Vehicle) | Sham group                     |                    |                    | TiO <sub>2</sub> -H group      |                    |                    |
|-----------------|---------------------------------------------------|--------------------|---------------|------------------------|--------------------------------------------------------------|--------------------------------|--------------------|--------------------|--------------------------------|--------------------|--------------------|
|                 |                                                   |                    |               |                        |                                                              | Relative methylation (Cy5/Cy3) | Cy3 signal (Input) | Cy5 signal (MeDIP) | Relative methylation (Cy5/Cy3) | Cy3 signal (Input) | Cy5 signal (MeDIP) |
| A_68_P27279615  | chr10:79365943-79365988                           | NM_001163276:5718  | Med16         | INSIDE                 | 1.202                                                        | 2.420                          | 2154.97            | 5214.57            | 2.908                          | 1617.33            | 4703.97            |
| A_68_P225957228 | chr8:74035689-74035737                            | NM_032398:-44      | Pivap         | PROMOTER               | 1.202                                                        | 2.105                          | 429.88             | 905.07             | 2.531                          | 413.76             | 1047.38            |
| A_68_P24538898  | chr6:71858964-71859010                            | NM_009088:-60      | Poir1a        | DIVERGENT_PROMOTER     | 1.202                                                        | 1.929                          | 539.01             | 1039.80            | 2.319                          | 435.79             | 1010.74            |
| A_68_P27287000  | chr10:80494188-80494232                           | NM_134135:2447     | Slc39a3       | INSIDE                 | 1.202                                                        | 4.007                          | 1550.65            | 6213.92            | 4.818                          | 1290.24            | 6216.36            |
| A_68_P23185610  | chr4:106311623-106311667                          | NM_177667:16591    | Ttc22         | INSIDE                 | 1.202                                                        | 2.320                          | 1270.77            | 2948.47            | 2.788                          | 1024.68            | 2856.75            |
| A_68_P27255926  | chr10:74779688-74779732                           | NM_009630:23       | Adora2a       | INSIDE                 | 1.201                                                        | 1.376                          | 3824.63            | 5261.75            | 1.653                          | 2937.97            | 4855.30            |
| A_68_P26888669  | chr9:122203192-122203236                          | NM_133979:278      | Ano10         | INSIDE                 | 1.201                                                        | 1.714                          | 2282.07            | 3911.22            | 2.058                          | 1951.61            | 4016.58            |
| A_68_P27869724  | chr11:64976171-64976215                           | NM_001099288:271   | Arhgap44      | INSIDE                 | 1.201                                                        | 1.935                          | 1509.74            | 2921.23            | 2.324                          | 1336.19            | 3105.08            |
| A_68_P26544129  | chr9:57684523-57684567                            | NM_019689:-2503    | Arid3b        | PROMOTER               | 1.201                                                        | 1.934                          | 472.62             | 913.96             | 2.322                          | 389.11             | 903.36             |
| A_68_P28732762  | chr12:110698103-110698147                         | NM_001190703:6460  | Dlk1          | INSIDE                 | 1.201                                                        | 1.565                          | 508.18             | 795.43             | 1.879                          | 438.73             | 824.48             |
| A_68_P28842025  | chr13:15555334-15555378                           | NM_008130:-199     | Gli3          | PROMOTER               | 1.201                                                        | 2.068                          | 1512.51            | 3128.27            | 2.483                          | 1353.34            | 3360.74            |
| A_68_P31978250  | chr9:16207196-16207240                            | NM_008139:-102     | Gnaq          | PROMOTER               | 1.201                                                        | 2.136                          | 1515.67            | 3237.78            | 2.566                          | 1259.86            | 3233.00            |
| A_68_P28156587  | chr11:115836535-115836579                         | NM_001005608:518   | Igf4          | INSIDE                 | 1.201                                                        | 1.793                          | 951.18             | 1705.87            | 2.154                          | 799.94             | 1722.72            |
| A_68_P24052806  | chr5:123349603-123349647                          | NM_013910:735      | Kdm2b         | INSIDE                 | 1.201                                                        | 1.905                          | 668.87             | 1274.50            | 2.289                          | 594.00             | 1359.42            |
| A_68_P31614616  | chr18:34937211-34937255                           | NM_001081256:571   | Kdm3b         | INSIDE                 | 1.201                                                        | 3.930                          | 2091.99            | 8222.40            | 4.721                          | 1702.98            | 8039.95            |
| A_68_P30345383  | chr15:75829147-75829191                           | NM_177922:4970     | Mapk15        | INSIDE                 | 1.201                                                        | 2.222                          | 3250.31            | 7222.26            | 2.669                          | 2359.77            | 6395.16            |
| A_68_P30512463  | chr16:4886291-4886335                             | NM_029657:61       | Mgrr1         | INSIDE                 | 1.201                                                        | 0.492                          | 1704.49            | 839.26             | 0.591                          | 1353.17            | 800.34             |
| A_68_P23391037  | chr4:147242647-147242691                          | NM_001025365:160   | Miip          | INSIDE                 | 1.201                                                        | 1.505                          | 804.89             | 1211.57            | 1.808                          | 594.37             | 1074.79            |
| A_68_P32383984  | chrX:50097577-50097621                            | NR_029657:-1854    | Mir106a       | PROMOTER               | 1.201                                                        | 1.595                          | 826.61             | 1318.74            | 1.916                          | 481.03             | 921.51             |
| A_68_P23893298  | chr5:92706005-92706049                            | NM_001163687:1181  | Naaa          | INSIDE                 | 1.201                                                        | 3.103                          | 919.71             | 2854.17            | 3.726                          | 788.33             | 2937.06            |
| A_68_P29694800  | chr14:69793093-69793137                           | NM_010920:3256     | Nkx2-6        | INSIDE                 | 1.201                                                        | 1.401                          | 1432.03            | 2005.64            | 1.682                          | 1249.73            | 2101.65            |
| A_68_P21239896  | chr2:56954902-56954946                            | NM_013613:12525    | Nr4a2         | DOWNSTREAM             | 1.201                                                        | 2.020                          | 672.20             | 1357.99            | 2.427                          | 561.07             | 1361.53            |
| A_68_P23950024  | chr5:104475955-104475999                          | NM_028794:-53      | Nudt9         | PROMOTER               | 1.201                                                        | 2.443                          | 749.67             | 1831.59            | 2.934                          | 647.10             | 1898.32            |
| A_68_P27542078  | chr10:12800336-128003380                          | NM_011119:-368     | Pa2g4         | PROMOTER               | 1.201                                                        | 1.971                          | 4498.71            | 8868.12            | 2.367                          | 3408.54            | 8067.44            |
| A_68_P25587733  | chr7:148445537-148445581                          | NM_001081118:30872 | Phrf1         | INSIDE                 | 1.201                                                        | 4.271                          | 960.13             | 4101.12            | 5.129                          | 862.30             | 4422.98            |
| A_68_P21044973  | chr2:19367231-19367275                            | NM_018809:-37      | Prlf1a        | PROMOTER               | 1.201                                                        | 1.546                          | 753.98             | 1165.95            | 1.857                          | 632.19             | 1174.06            |
| A_68_P22378033  | chr3:101728452-101728496                          | NM_001039371:-98   | Slc22a15      | PROMOTER               | 1.201                                                        | 1.422                          | 1112.23            | 1581.70            | 1.708                          | 910.47             | 1555.27            |
| A_68_P30137263  | chr15:36140403-36140447                           | NM_012031:31140    | Spag1         | INSIDE                 | 1.201                                                        | 4.975                          | 1552.37            | 7722.78            | 5.976                          | 1363.33            | 8147.36            |
| A_68_P28740618  | chr12:112078936-112078980                         | NM_011973:191      | Stk30         | INSIDE                 | 1.201                                                        | 1.460                          | 1162.40            | 1697.03            | 1.753                          | 998.21             | 1749.57            |
| A_68_P21431327  | chr2:92755255-92755299                            | NM_030725:19       | Syt13         | INSIDE                 | 1.201                                                        | 2.702                          | 815.33             | 2203.34            | 3.246                          | 732.49             | 2377.70            |
| A_68_P26447523  | chr9:40965396-40965440                            | NM_176860:159      | Ubash3b       | INSIDE                 | 1.201                                                        | 1.514                          | 1986.08            | 3007.57            | 1.819                          | 1579.76            | 2873.94            |
| A_68_P28765898  | chr12:117316198-117316242                         | NM_009511:25       | Vipr2         | INSIDE                 | 1.201                                                        | 2.137                          | 1336.38            | 2855.37            | 2.565                          | 1051.81            | 2698.41            |
| A_68_P25947915  | chr8:72298581-72298625                            | NM_177899:208      | Zfp866        | INSIDE                 | 1.201                                                        | 1.730                          | 1494.48            | 2584.81            | 2.076                          | 1491.94            | 3097.87            |
| A_68_P25106560  | chr7:55392877-55392921                            |                    | Unknown       |                        | 1.201                                                        | 1.374                          | 1979.16            | 2718.52            | 1.650                          | 1660.38            | 2740.15            |
| A_68_P27977898  | chr11:84326983-84327029                           | NM_019816:-3       | Aatf          | PROMOTER               | 1.200                                                        | 1.495                          | 986.76             | 1475.63            | 1.795                          | 842.45             | 1511.81            |
| A_68_P21007911  | chr2:11699878-11699922                            | NM_177268:521      | Ankrd16       | INSIDE                 | 1.200                                                        | 1.428                          | 2346.46            | 3351.49            | 1.714                          | 1802.10            | 3089.34            |
| A_68_P23887087  | chr5:91568591-91568635                            | NM_009704:-28      | Areg          | PROMOTER               | 1.200                                                        | 1.490                          | 1128.74            | 1681.98            | 1.789                          | 1004.59            | 1796.85            |
| A_68_P31013734  | chr17:4994384-4994428                             | NM_001085355:-667  | Arid1b        | PROMOTER               | 1.200                                                        | 1.402                          | 1052.67            | 1475.81            | 1.682                          | 1016.82            | 1710.06            |
| A_68_P26078866  | chr8:97190855-97190900                            | NM_024269:-128     | Arl2bp        | PROMOTER               | 1.200                                                        | 1.657                          | 1141.95            | 1892.25            | 1.989                          | 936.67             | 1862.85            |
| A_68_P28685559  | chr12:102267503-102267547                         | NM_026681:-331     | Ccdc88c       | PROMOTER               | 1.200                                                        | 1.599                          | 676.07             | 1081.01            | 1.919                          | 550.69             | 1057.01            |
| A_68_P27921612  | chr11:74452062-74452106                           | NM_001013784:18978 | E130309D14Rik | INSIDE                 | 1.200                                                        | 2.223                          | 724.51             | 1610.30            | 2.667                          | 632.73             | 1687.51            |
| A_68_P31121752  | chr17:28450748-28450792                           | NM_001163819:296   | Fance         | INSIDE                 | 1.200                                                        | 1.754                          | 642.77             | 1127.42            | 2.105                          | 622.22             | 1309.88            |
| A_68_P27288984  | chr10:80800721-80800765                           | NM_148951:5269     | Gipc3         | INSIDE                 | 1.200                                                        | 2.025                          | 1090.07            | 2207.29            | 2.429                          | 963.35             | 2340.28            |
| A_68_P30777939  | chr16:55822496-55822540                           | NM_001159394:-267  | Nfkfbz        | PROMOTER               | 1.200                                                        | 1.556                          | 764.68             | 1189.63            | 1.866                          | 685.66             | 1279.72            |
| A_68_P30424834  | chr15:89204309-89204353                           | NM_001111288:-81   | Sco2          | PROMOTER               | 1.200                                                        | 2.430                          | 3102.64            | 7540.79            | 2.915                          | 2493.70            | 7270.00            |
| A_68_P20354816  | chr11:75543154-75543198                           | NM_009208:336      | Slc4a3        | INSIDE                 | 1.200                                                        | 1.830                          | 869.00             | 1590.61            | 2.196                          | 677.53             | 1487.88            |
| A_68_P27542561  | chr10:128106235-128106279                         | NM_173733:4718     | Suox          | DOWNSTREAM             | 1.200                                                        | 1.712                          | 1991.25            | 3408.27            | 2.055                          | 1665.84            | 3422.59            |
| A_68_P23594736  | chr5:34856754-34856798                            | NM_139064:-148     | Tnip2         | PROMOTER               | 1.200                                                        | 1.639                          | 992.62             | 1626.68            | 1.966                          | 873.30             | 1716.85            |
| A_68_P21774854  | chr2:156865842-156865886                          | NM_001164663:39137 | 9830001H06Rik | INSIDE                 | 1.199                                                        | 2.038                          | 437.35             | 891.42             | 2.443                          | 395.35             | 965.81             |
| A_68_P30747802  | chr16:49855795-49855839                           | NM_010581:50       | C447          | INSIDE                 | 1.199                                                        | 2.040                          | 634.47             | 1294.02            | 2.445                          | 551.19             | 1347.74            |
| A_68_P27303131  | chr10:83997120-83997164                           | NM_175451:-509     | Ckap4         | PROMOTER               | 1.199                                                        | 1.871                          | 836.19             | 1564.72            | 2.243                          | 735.25             | 1649.43            |

| ProbeName      | Target position of probe on CpG island microarray | TargetID                 | GeneSymbol    | CpG island Description | Ratio of relative methylation (TiO <sub>2</sub> -NP/Vehicle) | Sham group                     |                    |                    | TiO <sub>2</sub> -H group      |                    |                    |
|----------------|---------------------------------------------------|--------------------------|---------------|------------------------|--------------------------------------------------------------|--------------------------------|--------------------|--------------------|--------------------------------|--------------------|--------------------|
|                |                                                   |                          |               |                        |                                                              | Relative methylation (Cy5/Cy3) | Cy3 signal (Input) | Cy5 signal (MeDIP) | Relative methylation (Cy5/Cy3) | Cy3 signal (Input) | Cy5 signal (MeDIP) |
| A_68_P32126462 | chr19:43515774-43515818                           | NM_031396:871            | Cnmm1         | INSIDE                 | 1.199                                                        | 2.659                          | 1402.10            | 3728.82            | 3.189                          | 1245.96            | 3973.03            |
| A_68_P31715735 | chr18:54022118-54022162                           | NM_152809:374            | Csnk1g3       | INSIDE                 | 1.199                                                        | 2.101                          | 1200.08            | 2521.09            | 2.519                          | 994.27             | 2504.13            |
| A_68_P24593883 | chr6:83447756-83447800                            | NM_001162521:9185        | Dguok         | INSIDE                 | 1.199                                                        | 1.520                          | 847.49             | 1288.42            | 1.823                          | 674.59             | 1229.91            |
| A_68_P24156003 | chr5:144076609-144076653                          | NM_172726:409            | E130309D02Rik | INSIDE                 | 1.199                                                        | 1.446                          | 1100.55            | 1591.31            | 1.733                          | 993.09             | 1721.15            |
| A_68_P26804376 | chr9:106553310-106553354                          | NM_001160353:5108        | Grm2          | INSIDE                 | 1.199                                                        | 1.780                          | 492.34             | 876.19             | 2.135                          | 373.69             | 797.69             |
| A_68_P26430295 | chr9:37192346-37192390                            | NM_175189:17178          | Hepacam       | INSIDE                 | 1.199                                                        | 1.859                          | 1049.45            | 1951.42            | 2.230                          | 889.29             | 1983.10            |
| A_68_P29942857 | chr14:119537874-119537918                         | NM_015820:410            | Hs6st3        | INSIDE                 | 1.199                                                        | 1.657                          | 555.66             | 920.94             | 1.988                          | 508.63             | 1011.00            |
| A_68_P26772687 | chr9:100978284-100978328                          | NM_001100451:144         | Msl2          | PROMOTER               | 1.199                                                        | 6.874                          | 1267.60            | 8713.53            | 8.242                          | 749.65             | 6178.30            |
| A_68_P29075365 | chr13:58909956-58910000                           | NM_001025074:785         | Nrk2          | INSIDE                 | 1.199                                                        | 2.290                          | 1856.49            | 4250.45            | 2.744                          | 1528.82            | 4195.30            |
| A_68_P32114803 | chr19:41459691-41459735                           | NM_031376:-152           | Pik3ap1       | PROMOTER               | 1.199                                                        | 2.753                          | 2209.03            | 6082.22            | 3.302                          | 1929.94            | 6372.56            |
| A_68_P31925249 | chr19:4811087-4811131                             | NM_019869:526            | Rbm14         | INSIDE                 | 1.199                                                        | 3.061                          | 2761.21            | 8452.75            | 3.671                          | 2371.79            | 8707.75            |
| A_68_P24153528 | chr5:143576639-143576683                          | NM_001122730:2406        | Tnrc18        | INSIDE                 | 1.199                                                        | 1.632                          | 671.58             | 1095.86            | 1.956                          | 607.97             | 1189.09            |
| A_68_P33004939 | A_68_P33004939                                    |                          | Unknown       |                        | 1.199                                                        | 2.169                          | 215.84             | 468.23             | 2.600                          | 309.92             | 805.91             |
| A_68_P22348135 | chr3:96001508-96001552                            | NM_026975:-21            | Bola1         | PROMOTER               | 1.198                                                        | 1.846                          | 874.79             | 1614.54            | 2.211                          | 705.40             | 1559.71            |
| A_68_P24268751 | chr6:17587317-17587361                            | NM_007604:241            | Capza2        | INSIDE                 | 1.198                                                        | 1.965                          | 973.94             | 1914.05            | 2.354                          | 819.49             | 1928.91            |
| A_68_P23397601 | chr4:148312774-148312818                          | NM_027195:134296         | Cas21         | INSIDE                 | 1.198                                                        | 2.111                          | 2234.17            | 4717.09            | 2.530                          | 1612.59            | 4079.45            |
| A_68_P26761428 | chr9:98856199-98856243                            | NM_012020:195            | Foxl2         | INSIDE                 | 1.198                                                        | 3.325                          | 1323.32            | 4400.14            | 3.985                          | 1143.24            | 4555.85            |
| A_68_P21375629 | chr2:80421545-80421589                            | NM_016965:-444           | Nckap1        | PROMOTER               | 1.198                                                        | 2.202                          | 1385.35            | 3051.00            | 2.637                          | 1195.45            | 3152.93            |
| A_68_P21100049 | chr2:29745376-29745420                            | NM_001177662:-184        | Odf2          | PROMOTER               | 1.198                                                        | 0.535                          | 1223.75            | 654.86             | 0.641                          | 977.58             | 626.78             |
| A_68_P20506809 | chr1:108069287-108069331                          | NM_133821:863            | Phlpp1        | INSIDE                 | 1.198                                                        | 0.362                          | 2336.90            | 846.47             | 0.434                          | 1997.62            | 867.09             |
| A_68_P21928446 | chr3:7366713-7366757                              | NM_008862:131            | Pkia          | INSIDE                 | 1.198                                                        | 1.586                          | 1508.69            | 2392.07            | 1.899                          | 1393.98            | 2646.76            |
| A_68_P21149538 | chr2:38499224-38499268                            | NM_011187:180            | Psmb7         | INSIDE                 | 1.198                                                        | 1.479                          | 3601.32            | 5327.07            | 1.772                          | 3034.55            | 5377.73            |
| A_68_P26044790 | chr8:91567290-91567334                            | NM_021390:749            | Sall1         | INSIDE                 | 1.198                                                        | 1.794                          | 2770.37            | 4969.06            | 2.149                          | 2217.58            | 4766.64            |
| A_68_P24640499 | chr6:91634367-91634411                            | NM_009320:328            | Slec6a6       | INSIDE                 | 1.198                                                        | 1.647                          | 1530.11            | 2519.63            | 1.973                          | 1271.29            | 2507.95            |
| A_68_P26228070 | chr8:124175318-124175362                          | NM_080855:493            | Zcche14       | INSIDE                 | 1.198                                                        | 2.972                          | 1405.77            | 4177.65            | 3.560                          | 1250.98            | 4453.92            |
| A_68_P24424843 | chr6:47855408-47855452                            | NM_146175:27877          | Zfp282        | INSIDE                 | 1.198                                                        | 2.585                          | 2972.27            | 7683.04            | 3.098                          | 2282.90            | 7071.57            |
| A_68_P24155214 | chr5:143919270-143919314                          | ENSMUST00000157346:-2486 |               | PROMOTER               | 1.198                                                        | 2.470                          | 724.17             | 1788.53            | 2.960                          | 700.45             | 2073.15            |
| A_68_P22953595 | chr4:58924697-58924741                            | NM_172381:879            | Al314180      | INSIDE                 | 1.197                                                        | 1.747                          | 2148.60            | 3754.12            | 2.092                          | 1726.90            | 3611.82            |
| A_68_P25524391 | chr7:137910411-137910455                          | NM_001081038:-7150       | Btbd16        | PROMOTER               | 1.197                                                        | 2.439                          | 1590.49            | 3878.90            | 2.919                          | 1337.47            | 3903.97            |
| A_68_P22822456 | chr4:32702176-32702220                            | NM_001122978:-249        | Casp8ap2      | PROMOTER               | 1.197                                                        | 1.979                          | 2193.11            | 4340.85            | 2.370                          | 1706.66            | 4044.52            |
| A_68_P31715220 | chr18:53904386-53904430                           | NM_178686:-207           | Cep120        | PROMOTER               | 1.197                                                        | 0.511                          | 1571.24            | 802.47             | 0.611                          | 1284.34            | 785.03             |
| A_68_P33008827 | chr4_random:110161-110205                         | NM_001033326:381         | Dhrsx         | INSIDE                 | 1.197                                                        | 2.014                          | 2401.18            | 4836.73            | 2.412                          | 2218.64            | 5350.53            |
| A_68_P28577477 | chr12:81859800-81859844                           | NM_001008423:1880        | Gm1568        | INSIDE                 | 1.197                                                        | 3.137                          | 857.75             | 2690.73            | 3.756                          | 782.02             | 2937.65            |
| A_68_P32245741 | chrX:8777677-8777721                              | NM_173414:600            | Lancl3        | INSIDE                 | 1.197                                                        | 2.141                          | 1388.26            | 2972.43            | 2.564                          | 798.82             | 2048.01            |
| A_68_P23156221 | chr4:101320393-101320437                          | NM_175036:27             | Leprot        | INSIDE                 | 1.197                                                        | 1.563                          | 1363.66            | 2131.28            | 1.871                          | 1274.77            | 2384.91            |
| A_68_P28565714 | chr12:79850102-79850146                           | NM_019579:191            | Mpp5          | INSIDE                 | 1.197                                                        | 1.828                          | 1176.34            | 2150.33            | 2.188                          | 1086.67            | 2377.44            |
| A_68_P21150017 | chr2:38567253-38567297                            | NM_139051:2788           | Nr5a1         | INSIDE                 | 1.197                                                        | 2.582                          | 1941.44            | 5012.63            | 3.091                          | 1513.12            | 4677.30            |
| A_68_P31442544 | chr17:91487486-91487530                           | NM_020252:4634           | Nrxn1         | INSIDE                 | 1.197                                                        | 3.043                          | 312.05             | 949.49             | 3.641                          | 342.10             | 1245.62            |
| A_68_P27542073 | chr10:128002710-128002754                         | NM_011119:258            | Pa2g4         | INSIDE                 | 1.197                                                        | 1.424                          | 7265.17            | 10347.92           | 1.705                          | 5235.63            | 8928.44            |
| A_68_P29246773 | chr13:97312251-97312295                           | NM_012048:168            | Polk          | INSIDE                 | 1.197                                                        | 2.587                          | 1124.61            | 2909.53            | 3.098                          | 983.35             | 3046.21            |
| A_68_P31157970 | chr17:35293556-35293603                           | NM_001199044:8243        | Prre2a        | INSIDE                 | 1.197                                                        | 2.537                          | 350.79             | 889.93             | 3.037                          | 289.97             | 880.53             |
| A_68_P30489328 | chr15:100884313-100884357                         | NM_011323:117633         | Scn8a         | DOWNSTREAM             | 1.197                                                        | 2.815                          | 1023.14            | 2880.41            | 3.371                          | 918.95             | 3097.88            |
| A_68_P26574111 | chr9:62993729-62993773                            | NM_172446:1037           | Skor1         | INSIDE                 | 1.197                                                        | 1.821                          | 586.46             | 1067.98            | 2.180                          | 467.76             | 1019.77            |
| A_68_P28889208 | chr13:24923670-24923714                           | NM_019551:165            | Tdp2          | INSIDE                 | 1.197                                                        | 1.784                          | 4814.88            | 8590.57            | 2.135                          | 4055.02            | 8658.86            |
| A_68_P30363491 | chr15:78798091-78798135                           | NM_001039155:19959       | Triobp        | INSIDE                 | 1.197                                                        | 3.848                          | 3215.14            | 12370.25           | 4.607                          | 2187.53            | 10078.29           |
| A_68_P27895906 | chr11:69395043-69395087                           | NM_001127233:1204        | Trp53         | INSIDE                 | 1.197                                                        | 3.025                          | 950.02             | 2874.19            | 3.622                          | 838.58             | 3037.04            |
| A_68_P24630036 | chr6:89785323-89785367                            | NM_053221:10187          | Vmn1r42       | DOWNSTREAM             | 1.197                                                        | 3.380                          | 1101.90            | 3724.54            | 4.047                          | 882.11             | 3570.12            |
| A_68_P24951463 | chr7:4946096-4946140                              | NM_026741:1585           | Zfp579        | INSIDE                 | 1.197                                                        | 2.466                          | 699.81             | 1725.54            | 2.951                          | 533.42             | 1574.09            |
| A_68_P28737719 | chr12:111558035-111558079                         | AK200124:417495          |               | INSIDE                 | 1.197                                                        | 3.062                          | 1165.11            | 3567.74            | 3.665                          | 932.54             | 3417.82            |
| A_68_P21133893 | chr2:35347074-35347118                            | ENSMUST00000121664:-57   |               | PROMOTER               | 1.197                                                        | 3.254                          | 622.32             | 2025.07            | 3.896                          | 566.77             | 2208.36            |
| A_68_P24460750 | chr6:53989374-53989418                            | NM_001163640:-529        | Chn2          | PROMOTER               | 1.196                                                        | 2.194                          | 803.20             | 1762.22            | 2.624                          | 792.44             | 2079.40            |



| ProbeName      | Target position of probe on CpG island microarray | TargetID           | GeneSymbol    | CpG island Description | Ratio of relative methylation (TiO <sub>2</sub> -NP/Vehicle) | Sham group                     |                    |                    | TiO <sub>2</sub> -H group      |                    |                    |
|----------------|---------------------------------------------------|--------------------|---------------|------------------------|--------------------------------------------------------------|--------------------------------|--------------------|--------------------|--------------------------------|--------------------|--------------------|
|                |                                                   |                    |               |                        |                                                              | Relative methylation (Cy5/Cy3) | Cy3 signal (Input) | Cy5 signal (MeDIP) | Relative methylation (Cy5/Cy3) | Cy3 signal (Input) | Cy5 signal (MeDIP) |
| A_68_P29841645 | chr14:99499049-99499093                           | NM_028315:-81      | Dis3          | PROMOTER               | 1.196                                                        | 2.390                          | 679.87             | 1624.88            | 2.859                          | 520.43             | 1488.11            |
| A_68_P32030095 | chr19:25581366-25581410                           | NM_015826:1193     | Dmrt1         | INSIDE                 | 1.196                                                        | 3.020                          | 447.64             | 1351.77            | 3.611                          | 400.99             | 1447.95            |
| A_68_P25537310 | chr7:140050852-140050896                          | NM_198017:-33      | Fam175b       | DIVERGENT_PROMOTER     | 1.196                                                        | 2.728                          | 877.71             | 2394.66            | 3.264                          | 839.35             | 2739.59            |
| A_68_P23246064 | chr4:119212892-119212936                          | NM_172699:622      | Foxj3         | INSIDE                 | 1.196                                                        | 1.754                          | 832.79             | 1460.53            | 2.098                          | 764.35             | 1603.68            |
| A_68_P28529995 | chr12:73171043-73171090                           | NM_181752:912      | Gpr135        | INSIDE                 | 1.196                                                        | 3.578                          | 898.42             | 3214.43            | 4.281                          | 786.93             | 3368.51            |
| A_68_P31125155 | chr17:29089634-29089678                           | NM_025888:-504     | Kctd20        | PROMOTER               | 1.196                                                        | 1.802                          | 1349.17            | 2431.22            | 2.155                          | 1174.92            | 2532.27            |
| A_68_P22674476 | chr3:156223832-156223876                          | NM_001039094:-903  | Negr1         | PROMOTER               | 1.196                                                        | 1.802                          | 6783.26            | 12224.22           | 2.155                          | 5207.52            | 11222.95           |
| A_68_P22774296 | chr4:21605518-21605562                            | NM_001080771:7570  | Prdm13        | PROMOTER               | 1.196                                                        | 1.873                          | 556.18             | 1041.73            | 2.241                          | 491.28             | 1100.81            |
| A_68_P31713995 | chr18:53712057-53712101                           | NM_001033281:87879 | Prdm6         | INSIDE                 | 1.196                                                        | 1.476                          | 662.09             | 977.41             | 1.766                          | 603.83             | 1066.11            |
| A_68_P23164321 | chr4:102786815-102786859                          | NM_146254:68       | Wdr78         | INSIDE                 | 1.196                                                        | 1.367                          | 1752.93            | 2395.52            | 1.635                          | 1521.03            | 2486.26            |
| A_68_P22217918 | chr3:68673912-68673956                            | NM_001167996:427   | 1110032F04Rik | INSIDE                 | 1.195                                                        | 6.444                          | 642.03             | 4137.02            | 7.697                          | 847.75             | 6525.18            |
| A_68_P32579167 | chrX:102274990-102275034                          | NM_026312:-101     | 2610029G23Rik | DIVERGENT_PROMOTER     | 1.195                                                        | 3.215                          | 226.15             | 727.06             | 3.843                          | 194.91             | 749.06             |
| A_68_P24091172 | chr5:130384666-130384710                          | NM_026916:279      | 4930579G22Rik | INSIDE                 | 1.195                                                        | 1.904                          | 685.49             | 1305.42            | 2.275                          | 571.90             | 1301.08            |
| A_68_P28752162 | chr12:113974838-113974882                         | NM_001024602:14476 | AW555464      | INSIDE                 | 1.195                                                        | 3.181                          | 4019.01            | 12786.48           | 3.801                          | 3145.97            | 11959.15           |
| A_68_P24735108 | chr6:108610209-108610253                          | NM_011498:-392     | Bhlhe40       | PROMOTER               | 1.195                                                        | 2.015                          | 812.46             | 1637.30            | 2.409                          | 752.79             | 1813.19            |
| A_68_P20827298 | chr1:173259152-173259196                          | NM_001128609:-101  | Dcedd         | PROMOTER               | 1.195                                                        | 1.451                          | 1647.59            | 2390.77            | 1.734                          | 1221.32            | 2117.55            |
| A_68_P32219569 | chr19:59533670-59533714                           | NM_010132:513      | Emx2          | INSIDE                 | 1.195                                                        | 2.136                          | 668.95             | 1428.72            | 2.553                          | 525.69             | 1342.02            |
| A_68_P23363268 | chr4:140864869-140864913                          | NM_010139:7736     | Epha2         | INSIDE                 | 1.195                                                        | 2.445                          | 1188.37            | 2905.43            | 2.923                          | 1078.11            | 3151.13            |
| A_68_P26134297 | chr8:108042949-108042993                          | NM_008289:325      | Hsd11b2       | INSIDE                 | 1.195                                                        | 3.040                          | 568.80             | 1728.95            | 3.631                          | 533.68             | 1937.83            |
| A_68_P27804079 | chr11:53113636-53113680                           | NM_008300:323      | Hspa4         | INSIDE                 | 1.195                                                        | 1.552                          | 1285.21            | 1994.36            | 1.855                          | 1131.28            | 2098.55            |
| A_68_P26500007 | chr9:49605368-49605412                            | NM_001081445:1784  | Neam1         | INSIDE                 | 1.195                                                        | 3.028                          | 1201.60            | 3638.90            | 3.618                          | 954.29             | 3452.15            |
| A_68_P29237468 | chr13:95638619-95638663                           | NM_011021:-6941    | Otp           | PROMOTER               | 1.195                                                        | 2.010                          | 508.94             | 1022.87            | 2.402                          | 443.75             | 1065.93            |
| A_68_P29619051 | chr14:56262543-56262587                           | NM_028780:79       | Tm9sf1        | INSIDE                 | 1.195                                                        | 2.774                          | 351.60             | 975.50             | 3.316                          | 288.82             | 957.78             |
| A_68_P21084626 | chr2:27282675-27282719                            | NM_009500:-351     | Vav2          | PROMOTER               | 1.195                                                        | 3.594                          | 984.63             | 3538.43            | 4.296                          | 828.94             | 3560.77            |
| A_68_P26511312 | A_68_P26511312                                    |                    | Unknown       |                        | 1.195                                                        | 3.374                          | 516.49             | 1742.85            | 4.032                          | 434.75             | 1752.71            |
| A_68_P20872224 | chr1:181733633-181733677                          | NM_026375:492      | Ahctf1        | INSIDE                 | 1.194                                                        | 2.197                          | 998.52             | 2193.43            | 2.622                          | 861.46             | 2258.66            |
| A_68_P21144181 | chr2:37649266-37649310                            | NM_001163566:17520 | Crb2          | INSIDE                 | 1.194                                                        | 3.612                          | 2212.31            | 7990.61            | 4.313                          | 1562.42            | 6738.56            |
| A_68_P29241525 | chr13:96374455-96374499                           | NM_010169:13912    | F2r           | INSIDE                 | 1.194                                                        | 2.824                          | 420.10             | 1186.56            | 3.373                          | 383.43             | 1293.37            |
| A_68_P28071798 | chr11:100941289-100941333                         | NM_010475:1586     | Hsd17b1       | INSIDE                 | 1.194                                                        | 1.542                          | 2070.49            | 3193.21            | 1.841                          | 1700.89            | 3132.07            |
| A_68_P27894856 | chr11:69213335-69213379                           | NM_001017426:13821 | Kdm6b         | INSIDE                 | 1.194                                                        | 2.139                          | 1525.97            | 3263.77            | 2.555                          | 1189.26            | 3038.14            |
| A_68_P20659550 | chr1:140738110-140738154                          | NM_001025565:889   | Lhx9          | INSIDE                 | 1.194                                                        | 1.416                          | 2120.04            | 3002.21            | 1.690                          | 1611.22            | 2723.76            |
| A_68_P25587562 | chr7:148414623-148414668                          | NM_001081118:-41   | Phrf1         | DIVERGENT_PROMOTER     | 1.194                                                        | 2.212                          | 755.34             | 1670.63            | 2.640                          | 589.72             | 1556.85            |
| A_68_P28164255 | chr11:117151945-117151989                         | NM_001113487:24407 | Septin9       | INSIDE                 | 1.194                                                        | 2.321                          | 353.04             | 819.56             | 2.771                          | 327.48             | 907.53             |
| A_68_P21836029 | chr2:167364249-167364293                          | NM_011427:544      | Snai1         | INSIDE                 | 1.194                                                        | 1.894                          | 2099.09            | 3976.36            | 2.262                          | 1770.36            | 4005.22            |
| A_68_P25983693 | chr8:80041310-80041354                            | NR_028125:378      | 0610038B21Rik | INSIDE                 | 1.193                                                        | 2.324                          | 912.20             | 2119.71            | 2.771                          | 812.28             | 2250.88            |
| A_68_P29419197 | chr14:14844919-14844966                           | NM_139227:-62      | Atxn7         | PROMOTER               | 1.193                                                        | 2.249                          | 1293.71            | 2909.69            | 2.684                          | 1082.05            | 2903.93            |
| A_68_P21094146 | chr2:28771793-28771837                            | NM_019446:127      | Barhl1        | INSIDE                 | 1.193                                                        | 1.706                          | 1434.26            | 2447.18            | 2.036                          | 1360.93            | 2770.20            |
| A_68_P21969034 | chr3:17954954-17954998                            | NM_021560:652      | Bhlhe22       | INSIDE                 | 1.193                                                        | 1.926                          | 666.69             | 1284.08            | 2.298                          | 597.03             | 1372.19            |
| A_68_P26880501 | chr9:120842440-120842484                          | NM_007614:-55      | Cttnb1        | PROMOTER               | 1.193                                                        | 1.575                          | 743.11             | 1170.28            | 1.878                          | 744.78             | 1398.97            |
| A_68_P27311664 | chr10:85484474-85484519                           | NM_153195:-177     | Fbxo7         | DIVERGENT_PROMOTER     | 1.193                                                        | 1.731                          | 2136.20            | 3696.93            | 2.065                          | 1924.36            | 3974.43            |
| A_68_P28675866 | chr12:100630793-100630837                         | NM_183186:57470    | Foxn3         | INSIDE                 | 1.193                                                        | 0.534                          | 1414.50            | 755.58             | 0.637                          | 1164.91            | 742.37             |
| A_68_P26248332 | chr8:127421933-127421977                          | NM_001111141:169   | Gm505         | INSIDE                 | 1.193                                                        | 2.011                          | 358.67             | 721.22             | 2.400                          | 303.45             | 728.20             |
| A_68_P25958332 | chr8:74213234-74213278                            | NM_013564:106      | Ins3          | INSIDE                 | 1.193                                                        | 2.543                          | 406.36             | 1033.31            | 3.033                          | 388.94             | 1179.47            |
| A_68_P30575359 | chr16:17722895-17722939                           | NM_001040683:107   | Med15         | INSIDE                 | 1.193                                                        | 1.761                          | 1883.39            | 3316.02            | 2.100                          | 1585.20            | 3329.50            |
| A_68_P22317891 | chr3:89018021-89018065                            | NM_001161824:215   | Mtx1          | INSIDE                 | 1.193                                                        | 3.137                          | 1233.42            | 3869.11            | 3.741                          | 972.58             | 3638.84            |
| A_68_P27560497 | chr11:4847206-4847250                             | NM_010904:839      | Nefh          | INSIDE                 | 1.193                                                        | 2.497                          | 338.55             | 845.38             | 2.979                          | 365.52             | 1088.94            |
| A_68_P23134368 | chr4:97445476-97445520                            | NM_001122953:1182  | Nfia          | INSIDE                 | 1.193                                                        | 2.120                          | 2538.36            | 5380.76            | 2.530                          | 2274.70            | 5754.40            |
| A_68_P27980110 | chr11:84693182-84693228                           | NM_027388:493      | Pigw          | INSIDE                 | 1.193                                                        | 3.518                          | 381.69             | 1342.88            | 4.197                          | 397.58             | 1668.78            |
| A_68_P31201639 | chr7:45672060-45672104                            | NM_013688:11700    | Tcte1         | INSIDE                 | 1.193                                                        | 2.517                          | 1119.73            | 2818.45            | 3.003                          | 934.86             | 2807.65            |
| A_68_P29560593 | chr14:41780203-41780247                           | NM_145928:-128     | Tspan14       | PROMOTER               | 1.193                                                        | 1.339                          | 2742.41            | 3670.95            | 1.597                          | 2420.12            | 3865.19            |
| A_68_P32320541 | chrX:34414442-34414486                            | NM_019668:104      | Ube2a         | INSIDE                 | 1.193                                                        | 2.080                          | 850.63             | 1769.42            | 2.482                          | 613.74             | 1523.27            |

| ProbeName      | Target position of probe on CpG island microarray | TargetID                 | GeneSymbol    | CpG island Description | Ratio of relative methylation (TiO <sub>2</sub> -NP/Vehicle) | Sham group                     |                    |                    | TiO <sub>2</sub> -H group      |                    |                    |
|----------------|---------------------------------------------------|--------------------------|---------------|------------------------|--------------------------------------------------------------|--------------------------------|--------------------|--------------------|--------------------------------|--------------------|--------------------|
|                |                                                   |                          |               |                        |                                                              | Relative methylation (Cy5/Cy3) | Cy3 signal (Input) | Cy5 signal (MeDIP) | Relative methylation (Cy5/Cy3) | Cy3 signal (Input) | Cy5 signal (MeDIP) |
| A_68_P30133052 | chr15:35301302-35301346                           | NM_177151:24             | Vps13b        | INSIDE                 | 1.193                                                        | 2.685                          | 540.21             | 1450.48            | 3.202                          | 524.15             | 1678.44            |
| A_68_P28706884 | chr12:106248180-106248224                         | NM_172500:-183           | 4831426119Rik | PROMOTER               | 1.192                                                        | 1.893                          | 1837.17            | 3477.10            | 2.256                          | 1579.06            | 3561.97            |
| A_68_P26920198 | chr10:7400931-7400975                             | NR_033219:4              | BC020402      | INSIDE                 | 1.192                                                        | 2.316                          | 925.05             | 2142.05            | 2.760                          | 836.31             | 2307.98            |
| A_68_P22412543 | chr3:108218968-108219012                          | NR_001004177:-578        | Celsr2        | PROMOTER               | 1.192                                                        | 3.067                          | 731.38             | 2243.17            | 3.655                          | 618.00             | 2259.06            |
| A_68_P26816896 | chr9:108735008-108735052                          | NM_080437:6380           | Celsr3        | INSIDE                 | 1.192                                                        | 0.489                          | 1330.34            | 649.95             | 0.583                          | 956.08             | 556.91             |
| A_68_P27941268 | chr11:77893553-77893597                           | NM_022313:311            | Eral1         | INSIDE                 | 1.192                                                        | 1.418                          | 2251.05            | 3192.11            | 1.691                          | 1829.04            | 3092.02            |
| A_68_P26458361 | chr9:42705530-42705574                            | NM_175481:46902          | Grik4         | INSIDE                 | 1.192                                                        | 4.344                          | 2887.47            | 12541.93           | 5.176                          | 2200.02            | 11387.69           |
| A_68_P23197991 | chr4:108520598-108520642                          | NM_029571:159            | Kti12         | INSIDE                 | 1.192                                                        | 0.580                          | 1232.03            | 714.76             | 0.692                          | 1317.47            | 911.39             |
| A_68_P28246268 | chr12:12944044-12944088                           | NM_008709:4576           | Mycn          | INSIDE                 | 1.192                                                        | 3.402                          | 588.88             | 2003.09            | 4.055                          | 585.54             | 2374.45            |
| A_68_P30961948 | chr16:91270536-91270580                           | NM_016968:545            | Olig1         | INSIDE                 | 1.192                                                        | 2.525                          | 1532.09            | 3867.92            | 3.010                          | 1309.77            | 3942.72            |
| A_68_P21626037 | chr2:129514047-129514091                          | NM_018863:1536           | Pdyn          | INSIDE                 | 1.192                                                        | 5.092                          | 2907.65            | 14805.35           | 6.069                          | 2024.43            | 12285.94           |
| A_68_P22825644 | chr4:33276387-33276431                            | NM_001034867:304         | Pm20d2        | INSIDE                 | 1.192                                                        | 2.991                          | 766.50             | 2292.29            | 3.566                          | 706.84             | 2520.66            |
| A_68_P22825900 | chr4:33334938-33334982                            | NM_001033225:802         | Pnrc1         | INSIDE                 | 1.192                                                        | 1.788                          | 1579.02            | 2822.94            | 2.131                          | 1408.37            | 3001.07            |
| A_68_P21604779 | chr2:125608569-125608613                          | NM_177608:16             | Secisbp2l     | INSIDE                 | 1.192                                                        | 1.335                          | 3704.89            | 4946.48            | 1.591                          | 3098.16            | 4930.71            |
| A_68_P25504896 | chr7:134417212-134417256                          | NM_009266:339            | Seps2         | INSIDE                 | 1.192                                                        | 3.351                          | 485.04             | 1625.54            | 3.995                          | 417.65             | 1668.70            |
| A_68_P31093838 | chr17:23956287-23956338                           | NM_175229:16159          | Srrm2         | INSIDE                 | 1.192                                                        | 2.276                          | 367.58             | 836.48             | 2.713                          | 295.98             | 802.86             |
| A_68_P27466138 | chr10:114239189-114239233                         | NM_146241:-784           | Trhde         | PROMOTER               | 1.192                                                        | 2.823                          | 1122.41            | 3169.11            | 3.365                          | 972.02             | 3270.88            |
| A_68_P25951333 | chr8:72877019-72877063                            | NM_001122829:132         | Upf1          | INSIDE                 | 1.192                                                        | 3.104                          | 613.15             | 1903.27            | 3.699                          | 563.05             | 2082.45            |
| A_68_P20319167 | chr1:69423580-69423624                            |                          | Unknown       |                        | 1.192                                                        | 1.903                          | 657.24             | 1251.01            | 2.269                          | 646.37             | 1466.36            |
| A_68_P21533269 | chr2:113057403-113057447                          | ENSMUST00000128192:-171  |               | PROMOTER               | 1.192                                                        | 2.249                          | 1327.52            | 2985.22            | 2.681                          | 1192.00            | 3195.92            |
| A_68_P30927981 | chr16:85173236-85173280                           | NM_001198823:694         | App           | INSIDE                 | 1.191                                                        | 2.061                          | 1193.89            | 2460.99            | 2.455                          | 1120.86            | 2751.57            |
| A_68_P28074534 | chr11:101413318-101413362                         | NM_009764:-71            | Bra1          | DIVERGENT_PROMOTER     | 1.191                                                        | 1.978                          | 790.37             | 1563.53            | 2.356                          | 631.98             | 1489.22            |
| A_68_P26423439 | chr9:35366246-35366290                            | NM_013932:-213           | Ddx25         | DIVERGENT_PROMOTER     | 1.191                                                        | 0.397                          | 1534.71            | 609.30             | 0.473                          | 1395.67            | 659.85             |
| A_68_P24991559 | chr7:19703647-19703691                            | NM_175530:-1539          | Fbxo46        | PROMOTER               | 1.191                                                        | 2.506                          | 1033.56            | 2590.50            | 2.985                          | 781.12             | 2331.61            |
| A_68_P20187366 | chr1:43220621-43220665                            | NM_010212:164            | Fhl2          | INSIDE                 | 1.191                                                        | 1.713                          | 659.20             | 1129.27            | 2.040                          | 561.46             | 1145.29            |
| A_68_P24135227 | chr5:139856761-139856805                          | NM_001038703:-9075       | Gpr146        | PROMOTER               | 1.191                                                        | 1.806                          | 1308.77            | 2363.14            | 2.151                          | 1151.99            | 2477.47            |
| A_68_P26039231 | chr8:90662304-90662348                            | NM_172757:543            | Heatr3        | INSIDE                 | 1.191                                                        | 1.426                          | 1290.16            | 1839.73            | 1.699                          | 1073.19            | 1822.86            |
| A_68_P23331512 | chr4:135528527-135528571                          | NM_011942:-39            | Lyp1a2        | PROMOTER               | 1.191                                                        | 1.682                          | 872.93             | 1468.63            | 2.004                          | 736.21             | 1475.27            |
| A_68_P27278629 | chr10:79202122-79202166                           | NM_172551:7182           | Polrmt        | INSIDE                 | 1.191                                                        | 2.210                          | 1590.85            | 3515.45            | 2.632                          | 1177.78            | 3099.80            |
| A_68_P31863198 | chr18:80453249-80453293                           | NM_001164423:226         | Pq1c1         | INSIDE                 | 1.191                                                        | 1.555                          | 491.19             | 763.82             | 1.853                          | 392.29             | 726.80             |
| A_68_P28523608 | chr12:72076024-72076068                           | NM_011184:437            | Psm3          | INSIDE                 | 1.191                                                        | 2.132                          | 680.54             | 1451.09            | 2.540                          | 587.20             | 1491.59            |
| A_68_P30401591 | chr15:85408071-85408115                           | NM_001163634:408         | Wnt7b         | INSIDE                 | 1.191                                                        | 1.743                          | 605.16             | 1054.96            | 2.077                          | 590.37             | 1225.99            |
| A_68_P24054285 | chr5:123610907-123610951                          | ENSMUST00000162839:-2462 |               | PROMOTER               | 1.191                                                        | 2.607                          | 1978.07            | 5156.25            | 3.106                          | 1583.43            | 4917.43            |
| A_68_P32145406 | chr19:46764395-46764439                           | NM_025563:21             | 2010012005Rik | INSIDE                 | 1.190                                                        | 1.643                          | 671.21             | 1102.64            | 1.954                          | 621.95             | 1215.38            |
| A_68_P25394423 | chr7:112935862-112935906                          | NM_001162943:180         | Dehs1         | INSIDE                 | 1.190                                                        | 1.440                          | 1037.34            | 1494.04            | 1.713                          | 954.00             | 1634.50            |
| A_68_P26286958 | chr9:7184623-7184667                              | NM_029775:79             | Deun1d5       | INSIDE                 | 1.190                                                        | 4.112                          | 566.12             | 2328.00            | 4.893                          | 516.28             | 2526.06            |
| A_68_P20294256 | chr1:64783172-64783216                            | NM_001042659:1130        | Fzd5          | INSIDE                 | 1.190                                                        | 1.474                          | 929.98             | 1371.07            | 1.754                          | 749.64             | 1315.21            |
| A_68_P20644881 | chr1:138157260-138157304                          | NM_001101156:168         | Gpr25         | INSIDE                 | 1.190                                                        | 2.591                          | 1119.21            | 2899.74            | 3.083                          | 1048.01            | 3231.41            |
| A_68_P27995148 | chr11:87430476-87430520                           | NM_001045527:-167        | Hsf5          | PROMOTER               | 1.190                                                        | 2.895                          | 616.40             | 1784.54            | 3.446                          | 559.56             | 1928.25            |
| A_68_P25086723 | chr7:51568193-51568237                            | NM_001034115:2581        | Shank1        | INSIDE                 | 1.190                                                        | 2.230                          | 648.03             | 1444.80            | 2.653                          | 497.98             | 1321.24            |
| A_68_P32427541 | chrX:61528987-61529031                            | NM_178740:1163           | Slitrk4       | INSIDE                 | 1.190                                                        | 2.126                          | 2222.11            | 4724.22            | 2.529                          | 1123.55            | 2841.52            |
| A_68_P28155493 | chr11:115676194-115676238                         | NM_029557:164            | Tsen54        | INSIDE                 | 1.190                                                        | 1.749                          | 1975.10            | 3455.21            | 2.081                          | 1574.95            | 3277.99            |
| A_68_P23185485 | chr4:106295363-106295407                          | NM_177667:331            | Ttc22         | INSIDE                 | 1.190                                                        | 3.357                          | 249.85             | 838.66             | 3.995                          | 242.24             | 967.81             |
| A_68_P24425394 | chr6:47974652-47974696                            | NM_001081382:23439       | Zfp777        | INSIDE                 | 1.190                                                        | 1.804                          | 1045.36            | 1886.35            | 2.148                          | 969.37             | 2082.10            |
| A_68_P21105114 | chr2:30626927-30626971                            |                          | Unknown       |                        | 1.190                                                        | 2.951                          | 569.73             | 1681.23            | 3.512                          | 533.67             | 1873.98            |
| A_68_P20046438 | chr1:14496853-14496897                            |                          | Unknown       |                        | 1.190                                                        | 2.234                          | 898.78             | 2008.12            | 2.658                          | 826.49             | 2196.89            |
| A_68_P24856098 | chr6:133055497-133055541                          | NM_001163445:262         | 2700089E24Rik | INSIDE                 | 1.189                                                        | 2.511                          | 1150.75            | 2889.25            | 2.986                          | 998.02             | 2980.26            |
| A_68_P22953596 | chr4:58924953-58924997                            | NM_172381:623            | AI314180      | INSIDE                 | 1.189                                                        | 3.328                          | 283.12             | 942.33             | 3.958                          | 280.63             | 1110.79            |
| A_68_P24059412 | chr5:124571591-124571635                          | NM_011256:94815          | Pitpnm2       | INSIDE                 | 1.189                                                        | 3.406                          | 921.50             | 3138.28            | 4.049                          | 794.11             | 3215.65            |
| A_68_P28164070 | chr11:117127735-117127779                         | NM_001113487:197         | Septin9       | INSIDE                 | 1.189                                                        | 1.800                          | 1115.46            | 2008.19            | 2.140                          | 1035.90            | 2216.58            |
| A_68_P28751511 | chr12:113882861-113882905                         | NM_001161737:-156        | Siva1         | PROMOTER               | 1.189                                                        | 1.556                          | 4921.13            | 7657.49            | 1.849                          | 3920.30            | 7250.40            |

| ProbeName      | Target position of probe on CpG island microarray | TargetID               | GeneSymbol    | CpG island Description | Ratio of relative methylation (TiO <sub>2</sub> -NP/Vehicle) | Sham group                     |                    |                    | TiO <sub>2</sub> -H group      |                    |                    |
|----------------|---------------------------------------------------|------------------------|---------------|------------------------|--------------------------------------------------------------|--------------------------------|--------------------|--------------------|--------------------------------|--------------------|--------------------|
|                |                                                   |                        |               |                        |                                                              | Relative methylation (Cy5/Cy3) | Cy3 signal (Input) | Cy5 signal (MeDIP) | Relative methylation (Cy5/Cy3) | Cy3 signal (Input) | Cy5 signal (MeDIP) |
| A_68_P24155692 | chr5:144016313-144016357                          | NM_017467:15367        | Zfp316        | INSIDE                 | 1.189                                                        | 2.120                          | 724.33             | 1535.30            | 2.519                          | 615.54             | 1550.65            |
| A_68_P24837689 | chr6:128150353-128150397                          | ENSMUST00000071101:267 |               | INSIDE                 | 1.189                                                        | 0.443                          | 1350.21            | 598.63             | 0.527                          | 1159.05            | 610.93             |
| A_68_P27508735 | chr10:121885914-121885958                         | NM_016847:382          | Avpr1a        | INSIDE                 | 1.188                                                        | 1.766                          | 1349.40            | 2383.62            | 2.099                          | 1122.68            | 2356.89            |
| A_68_P20561474 | chr1:122237586-122237630                          | NM_207233:450          | C1ql2         | INSIDE                 | 1.188                                                        | 1.979                          | 1061.38            | 2100.76            | 2.351                          | 921.90             | 2167.00            |
| A_68_P25948475 | chr8:72405501-72405545                            | NM_026818:5769         | Cilp2         | INSIDE                 | 1.188                                                        | 2.696                          | 442.98             | 1194.29            | 3.202                          | 421.83             | 1350.75            |
| A_68_P21877294 | chr2:174586233-174586277                          | NM_007903:-19          | Edn3          | PROMOTER               | 1.188                                                        | 7.053                          | 834.30             | 5884.22            | 8.380                          | 743.66             | 6231.99            |
| A_68_P21339409 | chr2:74600922-74600966                            | NM_010467:-92          | Hoxd1         | PROMOTER               | 1.188                                                        | 2.063                          | 905.17             | 1867.31            | 2.450                          | 780.69             | 1912.95            |
| A_68_P21809984 | chr2:162843268-162843312                          | NM_172150:83           | Ift52         | INSIDE                 | 1.188                                                        | 2.270                          | 792.72             | 1799.20            | 2.695                          | 724.18             | 1951.98            |
| A_68_P24759668 | chr6:113419933-113419977                          | NM_001034029:11066     | Il17re        | INSIDE                 | 1.188                                                        | 2.014                          | 1210.10            | 2436.55            | 2.391                          | 1148.67            | 2746.92            |
| A_68_P24053123 | chr5:123401996-123402040                          | NM_001005866:36524     | Kdm2b         | INSIDE                 | 1.188                                                        | 1.526                          | 4698.48            | 7171.64            | 1.814                          | 3737.51            | 6779.76            |
| A_68_P20726276 | chr1:155179693-155179737                          | NM_010683:202          | Lame1         | INSIDE                 | 1.188                                                        | 3.524                          | 1316.97            | 4641.04            | 4.186                          | 1311.92            | 5491.91            |
| A_68_P25266278 | chr7:87508116-87508160                            | NM_172903:8123         | Man2a2        | INSIDE                 | 1.188                                                        | 2.501                          | 995.22             | 2488.95            | 2.972                          | 678.20             | 2015.69            |
| A_68_P28052461 | chr1:97605654-97605698                            | NM_054051:342          | Pip4k2b       | INSIDE                 | 1.188                                                        | 1.696                          | 5214.13            | 8844.54            | 2.016                          | 3995.07            | 8053.93            |
| A_68_P24007303 | chr5:115460994-115461038                          | NM_029012:-516         | Sppl3         | PROMOTER               | 1.188                                                        | 2.151                          | 1644.55            | 3538.22            | 2.556                          | 1442.32            | 3686.58            |
| A_68_P28755239 | chr12:114425974-114426018                         | NM_153776:1883         | Tmem121       | INSIDE                 | 1.188                                                        | 1.731                          | 675.00             | 1168.54            | 2.056                          | 594.31             | 1221.78            |
| A_68_P23984847 | chr5:111706473-111706517                          | NM_024477:397673       | Tie28         | INSIDE                 | 1.188                                                        | 2.347                          | 483.10             | 1133.91            | 2.789                          | 440.81             | 1229.29            |
| A_68_P22878937 | chr4:44769646-44769690                            | NM_138590:238          | Zecch7        | INSIDE                 | 1.188                                                        | 1.381                          | 1864.27            | 2575.32            | 1.641                          | 1623.92            | 2664.81            |
| A_68_P31623248 | chr18:36479879-36479923                           | AK015580:1246          |               | DOWNSTREAM             | 1.188                                                        | 1.538                          | 1715.45            | 2638.67            | 1.827                          | 1513.76            | 2765.96            |
| A_68_P31939720 | chr19:7496955-7496999                             | NM_175381:4862         | 2700081O15Rik | INSIDE                 | 1.187                                                        | 1.668                          | 5836.06            | 9734.12            | 1.981                          | 3783.49            | 7493.24            |
| A_68_P26351648 | chr9:22193305-22193349                            | NM_028390:324          | Anln          | INSIDE                 | 1.187                                                        | 2.217                          | 622.15             | 1379.04            | 2.631                          | 581.35             | 1529.81            |
| A_68_P21078053 | chr2:26208046-26208090                            | NM_001037747:6999      | Card9         | INSIDE                 | 1.187                                                        | 2.198                          | 861.78             | 1894.55            | 2.609                          | 694.89             | 1812.96            |
| A_68_P27278709 | chr10:79217725-79217769                           | NM_023304:-117         | Fgf22         | DIVERGENT_PROMOTER     | 1.187                                                        | 1.474                          | 6133.92            | 9039.58            | 1.750                          | 4083.47            | 7146.00            |
| A_68_P31214873 | chr17:48041518-48041563                           | NM_001110824:20041     | Foxp4         | INSIDE                 | 1.187                                                        | 5.301                          | 3964.68            | 21018.71           | 6.292                          | 2851.71            | 17943.38           |
| A_68_P22864174 | chr4:41702682-41702730                            | NM_016658:581          | Galt          | INSIDE                 | 1.187                                                        | 1.593                          | 1093.96            | 1742.69            | 1.890                          | 730.83             | 1381.41            |
| A_68_P20769691 | chr1:162965037-162965081                          | NR_002840:-238         | Gas5          | DIVERGENT_PROMOTER     | 1.187                                                        | 3.134                          | 1806.28            | 5660.63            | 3.721                          | 1652.58            | 6149.38            |
| A_68_P32240896 | chrX:7499453-7499497                              | NM_013892:2527         | Peskin        | INSIDE                 | 1.187                                                        | 1.443                          | 2129.59            | 3072.44            | 1.713                          | 1105.82            | 1893.79            |
| A_68_P24992917 | chr7:19955431-19955475                            | NM_001010836:8888      | Ppp1r13l      | INSIDE                 | 1.187                                                        | 1.593                          | 1452.51            | 2313.95            | 1.891                          | 1275.53            | 2412.50            |
| A_68_P23545737 | chr5:24606038-24606082                            | NM_145401:400          | Prkag2        | INSIDE                 | 1.187                                                        | 3.249                          | 392.97             | 1276.68            | 3.857                          | 367.32             | 1416.68            |
| A_68_P26983364 | chr10:19569406-19569450                           | NM_029529:1837         | Slc35d3       | INSIDE                 | 1.187                                                        | 1.625                          | 1304.20            | 2118.67            | 1.928                          | 1016.82            | 1960.91            |
| A_68_P31163430 | chr17:36408687-36408731                           | NM_178281:-330         | Trim39        | PROMOTER               | 1.187                                                        | 1.483                          | 962.34             | 1427.45            | 1.761                          | 804.56             | 1416.46            |
| A_68_P22129169 | chr3:51144329-51144373                            | ENSMUST00000091144:138 |               | INSIDE                 | 1.187                                                        | 2.044                          | 1327.56            | 2713.40            | 2.426                          | 1121.58            | 2720.45            |
| A_68_P20286429 | chr1:63411957-63412001                            | ENSMUST00000120413:-39 |               | PROMOTER               | 1.187                                                        | 2.465                          | 915.34             | 2256.42            | 2.925                          | 833.13             | 2437.20            |
| A_68_P23467743 | chr5:8368197-8368241                              | NM_001098225:-137      | Adam22        | PROMOTER               | 1.186                                                        | 2.060                          | 1137.28            | 2343.04            | 2.444                          | 1056.57            | 2581.90            |
| A_68_P26234239 | chr8:125091584-125091628                          | NM_026014:-308         | Cdt1          | PROMOTER               | 1.186                                                        | 1.887                          | 1759.05            | 3319.18            | 2.238                          | 1454.65            | 3254.82            |
| A_68_P32769557 | chrX:154481653-154481697                          | NM_177751:-632         | Cnksr2        | PROMOTER               | 1.186                                                        | 2.112                          | 1061.37            | 2242.13            | 2.505                          | 635.68             | 1592.39            |
| A_68_P24388781 | chr6:40385401-40385445                            | NM_175528:710          | E330009J07Rik | INSIDE                 | 1.186                                                        | 2.071                          | 3956.35            | 8192.25            | 2.455                          | 3097.27            | 7604.23            |
| A_68_P21680290 | chr2:139503712-139503756                          | NM_001126490:-179      | Ism1          | PROMOTER               | 1.186                                                        | 1.578                          | 802.04             | 1265.39            | 1.871                          | 681.97             | 1275.83            |
| A_68_P21206006 | chr2:49922023-49922067                            | NM_177139:63           | Lyph6         | INSIDE                 | 1.186                                                        | 2.356                          | 1095.68            | 2581.11            | 2.793                          | 980.41             | 2738.11            |
| A_68_P29919368 | chr14:115439764-115439808                         | NR_029785:-3106        | Mir17         | PROMOTER               | 1.186                                                        | 2.291                          | 831.94             | 1905.57            | 2.718                          | 868.55             | 2360.38            |
| A_68_P25981542 | chr8:79709972-79710016                            | NM_001083906:283588    | Nr3c2         | INSIDE                 | 1.186                                                        | 1.934                          | 415.77             | 804.02             | 2.294                          | 319.17             | 732.29             |
| A_68_P22356140 | chr3:97555778-97555823                            | NM_178080:16137        | Pde4dip       | INSIDE                 | 1.186                                                        | 2.617                          | 519.58             | 1359.96            | 3.104                          | 402.47             | 1249.13            |
| A_68_P26744223 | chr9:95745481-95745525                            | NM_001033210:196       | Pls1          | INSIDE                 | 1.186                                                        | 2.495                          | 2416.27            | 6029.45            | 2.960                          | 2154.27            | 6375.87            |
| A_68_P21843419 | chr2:168591449-168591493                          | NM_175303:1231         | Sall4         | INSIDE                 | 1.186                                                        | 1.774                          | 1288.52            | 2285.22            | 2.104                          | 1112.90            | 2340.99            |
| A_68_P20945912 | chr1:194681174-194681218                          | NM_001177794:-3255     | Sertad4       | PROMOTER               | 1.186                                                        | 3.961                          | 384.23             | 1521.92            | 4.697                          | 425.63             | 1999.37            |
| A_68_P27947942 | chr11:79067536-79067580                           | NM_019653:639          | Wsb1          | INSIDE                 | 1.186                                                        | 2.064                          | 1868.53            | 3856.69            | 2.448                          | 1572.98            | 3850.16            |
| A_68_P21721815 | chr2:146838797-146838841                          | NM_011917:23           | Xrm2          | INSIDE                 | 1.186                                                        | 1.589                          | 1574.55            | 2502.68            | 1.884                          | 1402.54            | 2642.84            |
| A_68_P30402203 | chr15:85502100-85502144                           | AK038224:-5049         |               | PROMOTER               | 1.186                                                        | 1.807                          | 304.07             | 549.58             | 2.144                          | 261.43             | 560.43             |
| A_68_P22941605 | chr4:56814945-56814989                            | NM_001081420:-234      | BC026590      | PROMOTER               | 1.185                                                        | 1.675                          | 1300.10            | 2177.03            | 1.985                          | 1042.38            | 2069.03            |
| A_68_P23607906 | chr5:36827371-36827415                            | NM_025725:156          | Ccdc96        | INSIDE                 | 1.185                                                        | 1.484                          | 749.61             | 1112.23            | 1.758                          | 597.66             | 1050.89            |
| A_68_P31921839 | chr19:4214705-4214749                             | NM_019952:335          | Cicf1         | INSIDE                 | 1.185                                                        | 2.233                          | 1026.28            | 2291.78            | 2.647                          | 902.86             | 2389.76            |
| A_68_P21752059 | chr2:152769043-152769087                          | NM_001159376:8254      | Dusp15        | INSIDE                 | 1.185                                                        | 2.077                          | 342.13             | 710.58             | 2.461                          | 358.37             | 881.85             |

| ProbeName      | Target position of probe on CpG island microarray | TargetID                 | GeneSymbol    | CpG island Description | Ratio of relative methylation (TiO <sub>2</sub> -NP/Vehicle) | Sham group                     |                    |                    | TiO <sub>2</sub> -H group      |                    |                    |
|----------------|---------------------------------------------------|--------------------------|---------------|------------------------|--------------------------------------------------------------|--------------------------------|--------------------|--------------------|--------------------------------|--------------------|--------------------|
|                |                                                   |                          |               |                        |                                                              | Relative methylation (Cy5/Cy3) | Cy3 signal (Input) | Cy5 signal (MeDIP) | Relative methylation (Cy5/Cy3) | Cy3 signal (Input) | Cy5 signal (MeDIP) |
| A_68_P22957376 | chr4:59638970-59639014                            | NM_153158:-100           | E130308A19Rik | PROMOTER               | 1.185                                                        | 2.119                          | 1021.97            | 2165.07            | 2.511                          | 939.08             | 2357.65            |
| A_68_P27640630 | chr11:22186736-22186780                           | NM_153078:-917           | Ehbp1         | PROMOTER               | 1.185                                                        | 2.496                          | 1389.99            | 3469.37            | 2.958                          | 1241.61            | 3672.92            |
| A_68_P27180609 | chr10:60915255-60915299                           | NM_010124:141            | Eif4ebp2      | INSIDE                 | 1.185                                                        | 1.630                          | 1554.18            | 2534.08            | 1.932                          | 1249.09            | 2413.82            |
| A_68_P31927969 | chr19:5307468-5307512                             | NM_001024717:9160        | Gal3st3       | INSIDE                 | 1.185                                                        | 3.004                          | 403.44             | 1212.03            | 3.559                          | 387.39             | 1378.67            |
| A_68_P29072859 | chr13:58460443-58460487                           | NM_175214:-4241          | Kif27         | PROMOTER               | 1.185                                                        | 1.384                          | 2947.81            | 4079.93            | 1.641                          | 2500.69            | 4102.47            |
| A_68_P31930563 | chr19:5742280-5742324                             | NM_008520:1399           | Ltbp3         | INSIDE                 | 1.185                                                        | 2.833                          | 929.09             | 2632.34            | 3.358                          | 853.78             | 2866.75            |
| A_68_P30340463 | chr15:74785980-74786024                           | NM_001164040:467         | Ly6e          | INSIDE                 | 1.185                                                        | 2.730                          | 21731.91           | 59321.27           | 3.234                          | 14707.19           | 47568.69           |
| A_68_P32266424 | chrX:13063560-13063604                            | NM_173415:18785          | Nyx           | INSIDE                 | 1.185                                                        | 4.530                          | 363.54             | 1646.94            | 5.366                          | 262.53             | 1408.85            |
| A_68_P20782634 | chr1:165242803-165242847                          | NM_011127:957            | Prrx1         | INSIDE                 | 1.185                                                        | 2.155                          | 542.24             | 1168.54            | 2.553                          | 451.77             | 1153.34            |
| A_68_P25588867 | chr7:148633309-148633353                          | NM_026020:-218           | Rplp2         | DIVERGENT_PROMOTER     | 1.185                                                        | 1.692                          | 1470.19            | 2486.98            | 2.004                          | 1106.43            | 2217.30            |
| A_68_P26887821 | chr9:122075732-122075776                          | NM_001164572:49371       | Snrk          | INSIDE                 | 1.185                                                        | 1.881                          | 1028.17            | 1934.07            | 2.228                          | 775.75             | 1728.57            |
| A_68_P31421396 | chr17:87534273-87534317                           | NM_019654:27276          | Soes5         | INSIDE                 | 1.185                                                        | 3.050                          | 2188.27            | 6674.15            | 3.615                          | 1812.63            | 6553.10            |
| A_68_P21864919 | chr2:172376460-172376504                          | NM_001159696:-8          | Tcfap2e       | PROMOTER               | 1.185                                                        | 1.716                          | 507.49             | 870.94             | 2.033                          | 376.61             | 765.74             |
| A_68_P24819777 | chr6:125236044-125236088                          | NM_009446:-6             | Tuba3a        | PROMOTER               | 1.185                                                        | 1.612                          | 739.24             | 1191.95            | 1.911                          | 570.68             | 1090.31            |
| A_68_P20977354 | chr2:6022037-6022081                              | NM_001159675:29173       | 5430407P10Rik | INSIDE                 | 1.184                                                        | 2.323                          | 409.44             | 950.97             | 2.749                          | 347.66             | 955.67             |
| A_68_P24010911 | chr5:116112644-116112688                          | NM_001080808:68902       | Ccdc64        | INSIDE                 | 1.184                                                        | 3.239                          | 3818.08            | 12366.38           | 3.833                          | 3197.66            | 12257.70           |
| A_68_P27934411 | chr11:76660318-76660362                           | NM_007754:170            | Cpd           | INSIDE                 | 1.184                                                        | 0.507                          | 1023.03            | 519.18             | 0.601                          | 907.53             | 545.40             |
| A_68_P25949731 | chr8:72608268-72608312                            | NM_177900:863            | Hapln4        | INSIDE                 | 1.184                                                        | 1.438                          | 804.93             | 1157.12            | 1.703                          | 651.75             | 1109.70            |
| A_68_P27315613 | chr10:86168167-86168211                           | NM_011631:1              | Hsp90b1       | INSIDE                 | 1.184                                                        | 1.564                          | 4080.66            | 6382.68            | 1.853                          | 3268.24            | 6054.53            |
| A_68_P21420371 | chr2:90894443-90894487                            | NM_008948:292            | Psmc3         | INSIDE                 | 1.184                                                        | 3.449                          | 2662.54            | 9182.12            | 4.083                          | 2021.47            | 8254.26            |
| A_68_P32019129 | chr19:23762386-23762431                           | NM_028208:519            | Ptar1         | INSIDE                 | 1.184                                                        | 2.079                          | 290.24             | 603.33             | 2.462                          | 254.60             | 626.81             |
| A_68_P25025138 | chr7:29849498-29849542                            | NM_009109:60650          | Ryr1          | INSIDE                 | 1.184                                                        | 2.703                          | 1634.30            | 4417.20            | 3.199                          | 1327.01            | 4245.69            |
| A_68_P26750366 | chr9:96896367-96896411                            | NM_145134:22386          | Spsb4         | INSIDE                 | 1.184                                                        | 2.871                          | 457.80             | 1314.36            | 3.400                          | 410.59             | 1395.93            |
| A_68_P28678695 | chr12:101122821-101122865                         | NM_028354:118            | Tdp1          | INSIDE                 | 1.184                                                        | 3.712                          | 433.79             | 1610.22            | 4.397                          | 383.01             | 1683.92            |
| A_68_P31092442 | chr17:23713394-23713438                           | NM_011747:23038          | Zfp13         | INSIDE                 | 1.184                                                        | 1.502                          | 1815.08            | 2726.65            | 1.779                          | 1364.63            | 2427.39            |
| A_68_P32674749 | chrX:131543372-131543416                          | NM_175446:354            | Zmat1         | INSIDE                 | 1.184                                                        | 2.635                          | 546.21             | 1438.99            | 3.118                          | 325.94             | 1016.40            |
| A_68_P28752686 | chr12:114047096-114047140                         | NM_145450:-67            | BC022687      | PROMOTER               | 1.183                                                        | 1.855                          | 823.29             | 1526.84            | 2.193                          | 617.78             | 1354.87            |
| A_68_P28313704 | chr12:29237167-29237211                           | NM_001177964:-3986       | Dcdc2c        | PROMOTER               | 1.183                                                        | 2.331                          | 826.07             | 1925.55            | 2.759                          | 692.29             | 1909.80            |
| A_68_P21819504 | chr2:164571506-164571550                          | NM_133763:14             | Dnntp1        | INSIDE                 | 1.183                                                        | 2.527                          | 1027.54            | 2596.88            | 2.991                          | 918.72             | 2747.56            |
| A_68_P29703988 | chr14:71289674-71289718                           | NM_008115:-240           | Gfra2         | PROMOTER               | 1.183                                                        | 1.804                          | 546.38             | 985.88             | 2.134                          | 428.67             | 914.97             |
| A_68_P24133864 | chr5:139626346-139626390                          | NM_001081265:192         | Heatr2        | INSIDE                 | 1.183                                                        | 2.951                          | 1728.63            | 5102.00            | 3.490                          | 1598.98            | 5580.66            |
| A_68_P31244136 | chr17:53706802-53706846                           | NM_020005:529            | Kat2b         | INSIDE                 | 1.183                                                        | 2.247                          | 692.47             | 1556.13            | 2.657                          | 577.68             | 1535.14            |
| A_68_P30795699 | chr16:59471732-59471776                           | NM_025910:154            | Mina          | INSIDE                 | 1.183                                                        | 1.667                          | 1395.38            | 2326.12            | 1.972                          | 1287.78            | 2538.87            |
| A_68_P27708454 | chr11:35583064-35583108                           | NM_145962:90             | Pank3         | INSIDE                 | 1.183                                                        | 2.247                          | 5735.70            | 12885.78           | 2.658                          | 4833.75            | 12850.05           |
| A_68_P21612440 | chr2:127096105-127096149                          | NM_139308:162            | Stard7        | INSIDE                 | 1.183                                                        | 4.366                          | 1182.72            | 5163.27            | 5.165                          | 911.91             | 4710.40            |
| A_68_P28074032 | chr11:101327214-101327258                         | NM_012037:277            | Vat1          | INSIDE                 | 1.183                                                        | 1.883                          | 287.23             | 540.81             | 2.227                          | 251.38             | 559.85             |
| A_68_P20859688 | chr1:179372159-179372203                          | NM_001012330:-2611       | Zfp238        | PROMOTER               | 1.183                                                        | 0.499                          | 1499.90            | 748.11             | 0.590                          | 1220.01            | 719.64             |
| A_68_P21104695 | chr2:30549015-30549059                            | ENSMUST00000146702:63862 |               | DOWNSTREAM             | 1.183                                                        | 2.707                          | 639.24             | 1730.46            | 3.203                          | 529.32             | 1695.54            |
| A_68_P24864121 | chr6:134848481-134848525                          | NR_029441:524            | 2810454H06Rik | INSIDE                 | 1.182                                                        | 1.563                          | 488.17             | 763.02             | 1.848                          | 498.94             | 922.13             |
| A_68_P31331958 | chr17:1351874-1351918                             | NM_026064:-23            | 2900073G15Rik | PROMOTER               | 1.182                                                        | 1.855                          | 858.64             | 1592.84            | 2.193                          | 746.12             | 1636.45            |
| A_68_P26019649 | chr8:86938288-86938332                            | NM_007578:-952           | Cacna1a       | PROMOTER               | 1.182                                                        | 2.444                          | 815.37             | 1992.98            | 2.888                          | 781.70             | 2257.55            |
| A_68_P27764452 | chr11:45665495-45665539                           | NM_001045520:51          | Clint1        | INSIDE                 | 1.182                                                        | 1.525                          | 772.74             | 1178.77            | 1.804                          | 801.22             | 1445.12            |
| A_68_P23192160 | chr4:107356153-107356197                          | NM_019872:593            | Dmrtb1        | INSIDE                 | 1.182                                                        | 3.323                          | 619.94             | 2059.90            | 3.929                          | 545.95             | 2144.78            |
| A_68_P20825164 | chr1:172815355-172815399                          | NM_023173:295            | Dusp12        | INSIDE                 | 1.182                                                        | 1.396                          | 1760.97            | 2457.70            | 1.649                          | 1559.16            | 2571.46            |
| A_68_P27893912 | chr11:69049971-69050015                           | NM_008192:532            | Guey2c        | INSIDE                 | 1.182                                                        | 2.340                          | 772.44             | 1807.42            | 2.767                          | 710.63             | 1966.12            |
| A_68_P25274810 | chr7:89078740-89078784                            | NM_013886:583            | Hdgfrp3       | INSIDE                 | 1.182                                                        | 2.374                          | 1065.61            | 2529.93            | 2.806                          | 985.69             | 2765.69            |
| A_68_P31558687 | chr18:24280026-24280070                           | NM_172625:272            | Ino80c        | INSIDE                 | 1.182                                                        | 2.458                          | 2861.81            | 7033.48            | 2.905                          | 2881.99            | 8371.38            |
| A_68_P27828613 | chr11:57822962-57823006                           | NM_028451:419            | Larp1         | INSIDE                 | 1.182                                                        | 5.529                          | 528.11             | 2919.82            | 6.538                          | 413.35             | 2702.39            |
| A_68_P24159776 | chr5:144934512-144934556                          | NM_001081109:73230       | Lmtk2         | INSIDE                 | 1.182                                                        | 2.453                          | 632.54             | 1551.69            | 2.900                          | 510.60             | 1480.78            |
| A_68_P21240085 | chr2:56976720-56976764                            | NM_001139509:-328        | Nr4a2         | PROMOTER               | 1.182                                                        | 2.356                          | 1070.53            | 2521.96            | 2.784                          | 963.40             | 2682.54            |
| A_68_P32147398 | chr19:47125047-47125091                           | NM_027654:267            | Pegf6         | INSIDE                 | 1.182                                                        | 1.655                          | 499.17             | 825.88             | 1.956                          | 465.54             | 910.51             |

| ProbeName      | Target position of probe on CpG island microarray | TargetID                | GeneSymbol    | CpG island Description | Ratio of relative methylation (TiO <sub>2</sub> -NP/Vehicle) | Sham group                     |                    |                    | TiO <sub>2</sub> -H group      |                    |                    |
|----------------|---------------------------------------------------|-------------------------|---------------|------------------------|--------------------------------------------------------------|--------------------------------|--------------------|--------------------|--------------------------------|--------------------|--------------------|
|                |                                                   |                         |               |                        |                                                              | Relative methylation (Cy5/Cy3) | Cy3 signal (Input) | Cy5 signal (MeDIP) | Relative methylation (Cy5/Cy3) | Cy3 signal (Input) | Cy5 signal (MeDIP) |
| A_68_P22518661 | chr3:128907456-128907500                          | NM_001042502-9376       | Pitx2         | PROMOTER               | 1.182                                                        | 2.649                          | 2229.61            | 5905.84            | 3.131                          | 1841.62            | 5765.92            |
| A_68_P31802711 | chr18:69505644-69505688                           | NM_001083967:292        | Tef4          | INSIDE                 | 1.182                                                        | 1.646                          | 747.31             | 1230.06            | 1.946                          | 626.15             | 1218.63            |
| A_68_P22510646 | chr3:127492950-127492994                          | NM_145133:142           | Tifa          | INSIDE                 | 1.182                                                        | 1.546                          | 1220.98            | 1887.04            | 1.828                          | 1104.80            | 2019.08            |
| A_68_P25411545 | chr7:117205191-117205235                          | NM_009281:-3            | Zfp143        | PROMOTER               | 1.182                                                        | 3.087                          | 10187.97           | 31449.07           | 3.649                          | 7588.74            | 27692.57           |
| A_68_P24800508 | chr6:120786336-120786380                          | NM_153516:111           | Bel2l13       | INSIDE                 | 1.181                                                        | 3.461                          | 2660.20            | 9207.73            | 4.089                          | 1988.63            | 8131.17            |
| A_68_P28944866 | chr13:35832734-35832778                           | NM_001123386:-514       | Cdyl          | PROMOTER               | 1.181                                                        | 2.282                          | 1083.90            | 2473.82            | 2.696                          | 879.59             | 2371.61            |
| A_68_P25313627 | chr7:97591983-97592027                            | NM_145151:714           | Crebzf        | INSIDE                 | 1.181                                                        | 2.402                          | 1157.23            | 2779.37            | 2.835                          | 1094.65            | 3103.85            |
| A_68_P24951534 | chr7:4960187-4960231                              | NM_001110330:4636       | Fiz1          | INSIDE                 | 1.181                                                        | 2.640                          | 762.45             | 2012.68            | 3.116                          | 749.75             | 2336.50            |
| A_68_P31075179 | chr17:17987266-17987310                           | NM_008215:4864          | Has1          | INSIDE                 | 1.181                                                        | 2.604                          | 1723.66            | 4488.49            | 3.075                          | 1390.40            | 4275.85            |
| A_68_P23192848 | chr4:107475278-107475322                          | NM_001080926:437        | Lrp8          | INSIDE                 | 1.181                                                        | 1.593                          | 933.55             | 1487.56            | 1.883                          | 822.84             | 1549.00            |
| A_68_P32181745 | chr19:53388277-53388321                           | NM_001008542:3303       | Mxi1          | INSIDE                 | 1.181                                                        | 1.535                          | 823.75             | 1264.39            | 1.813                          | 757.53             | 1373.06            |
| A_68_P22875663 | chr4:44181273-44181317                            | NM_001038993:-139       | Rnf38         | PROMOTER               | 1.181                                                        | 2.728                          | 478.17             | 1304.55            | 3.221                          | 446.94             | 1439.71            |
| A_68_P27923093 | chr11:74710538-74710582                           | NM_197943:22            | Sgsm2         | INSIDE                 | 1.181                                                        | 1.988                          | 1772.45            | 3524.28            | 2.348                          | 1486.53            | 3490.62            |
| A_68_P28071034 | chr11:100800458-100800502                         | NM_011486:345           | Stat3         | INSIDE                 | 1.181                                                        | 1.405                          | 1214.34            | 1706.46            | 1.659                          | 1050.90            | 1743.59            |
| A_68_P23966229 | chr5:107717967-107718011                          | NM_011578:626           | Tgfbf3        | INSIDE                 | 1.181                                                        | 2.620                          | 1501.38            | 3933.04            | 3.093                          | 1306.12            | 4040.12            |
| A_68_P21739582 | chr2:150351755-150351799                          | ENSMUST00000119514:4948 |               | DOWNSTREAM             | 1.181                                                        | 1.374                          | 1832.06            | 2517.64            | 1.623                          | 1698.13            | 2755.29            |
| A_68_P27899783 | chr11:70068622-70068666                           | NM_007440:199           | Alox12        | INSIDE                 | 1.180                                                        | 1.346                          | 2549.15            | 3430.63            | 1.588                          | 1853.75            | 2943.08            |
| A_68_P30990992 | chr16:96303585-96303629                           | NM_145125:429           | Brwd1         | INSIDE                 | 1.180                                                        | 2.371                          | 2169.95            | 5145.85            | 2.797                          | 2021.10            | 5653.66            |
| A_68_P32316566 | chrX:33565537-33565581                            | NM_001009947:136732     | Dock11        | INSIDE                 | 1.180                                                        | 3.352                          | 858.77             | 2878.78            | 3.956                          | 606.25             | 2398.36            |
| A_68_P28051738 | chr11:97490235-97490279                           | NM_175332:774           | E130012A19Rik | INSIDE                 | 1.180                                                        | 1.988                          | 1857.30            | 3691.41            | 2.345                          | 1690.47            | 3964.67            |
| A_68_P30478816 | chr15:99054388-99054432                           | NM_010601:-996          | Kenh3         | PROMOTER               | 1.180                                                        | 1.554                          | 2388.94            | 3713.30            | 1.833                          | 1842.63            | 3378.35            |
| A_68_P32396635 | chrX:53850948-53850992                            | NM_146234:126           | Mmgt1         | INSIDE                 | 1.180                                                        | 1.481                          | 866.96             | 1284.08            | 1.748                          | 415.55             | 726.20             |
| A_68_P24992504 | chr7:19878717-19878763                            | NM_001025364:2293       | Rtn2          | INSIDE                 | 1.180                                                        | 3.278                          | 1027.12            | 3366.73            | 3.868                          | 788.62             | 3050.45            |
| A_68_P27340134 | chr10:90586370-90586414                           | NM_133668:316           | Sle25a3       | INSIDE                 | 1.180                                                        | 0.543                          | 1031.27            | 559.70             | 0.640                          | 899.50             | 575.84             |
| A_68_P28052666 | chr11:97643069-97643113                           | NR_028078:-10           | Snora21       | PROMOTER               | 1.180                                                        | 3.549                          | 623.28             | 2212.08            | 4.189                          | 494.91             | 2072.95            |
| A_68_P20353686 | chr1:75384915-75384959                            | NM_001085370:2752       | Speg          | INSIDE                 | 1.180                                                        | 1.553                          | 1206.68            | 1874.30            | 1.833                          | 1135.92            | 2082.23            |
| A_68_P31335315 | chr17:71965807-71965851                           | NM_175639:274           | Wdr43         | INSIDE                 | 1.180                                                        | 2.560                          | 1507.13            | 3858.32            | 3.022                          | 1328.52            | 4014.40            |
| A_68_P23195378 | chr4:107973651-107973695                          | NM_001033634:23         | Zyg11b        | INSIDE                 | 1.180                                                        | 1.535                          | 3893.30            | 5977.24            | 1.811                          | 2816.66            | 5101.46            |
| A_68_P33005897 | A_68_P33005897                                    |                         |               | Unknown                | 1.180                                                        | 2.981                          | 617.20             | 1839.84            | 3.518                          | 536.57             | 1887.64            |
| A_68_P31620715 | chr18:36048154-36048198                           |                         |               | Unknown                | 1.180                                                        | 2.156                          | 932.07             | 2009.85            | 2.545                          | 857.65             | 2182.47            |
| A_68_P21839558 | chr2:167942901-167942945                          |                         |               | Unknown                | 1.180                                                        | 6.706                          | 1506.48            | 10102.30           | 7.911                          | 1155.79            | 9143.71            |
| A_68_P32373281 | chrX:48194954-48194998                            | NM_133729:364           | 2610018G03Rik | INSIDE                 | 1.179                                                        | 1.657                          | 911.24             | 1509.50            | 1.953                          | 537.77             | 1050.16            |
| A_68_P29523397 | chr14:34133413-34133457                           | NM_153800:103426        | Arhgap22      | INSIDE                 | 1.179                                                        | 1.504                          | 1672.24            | 2514.42            | 1.773                          | 1478.82            | 2621.22            |
| A_68_P20753946 | chr1:160292678-160292722                          | NM_001205204:266        | Astn1         | INSIDE                 | 1.179                                                        | 4.381                          | 602.88             | 2640.95            | 5.163                          | 524.62             | 2708.50            |
| A_68_P21814762 | chr2:163679681-163679725                          | NM_001030292:217        | Kenk15        | INSIDE                 | 1.179                                                        | 2.991                          | 712.02             | 2129.53            | 3.528                          | 623.69             | 2200.14            |
| A_68_P22201243 | chr3:65463433-65463477                            | NM_001166659:-6695      | Lekr1         | PROMOTER               | 1.179                                                        | 3.237                          | 796.34             | 2577.44            | 3.815                          | 737.08             | 2811.72            |
| A_68_P31923503 | chr19:4509996-4510046                             | NM_001162946:-451       | Pcx           | PROMOTER               | 1.179                                                        | 1.900                          | 1097.27            | 2085.11            | 2.241                          | 755.88             | 1694.03            |
| A_68_P30650135 | chr16:31932946-31932990                           | NM_172822:-968          | Pigz          | PROMOTER               | 1.179                                                        | 2.748                          | 258.77             | 711.14             | 3.240                          | 282.25             | 914.61             |
| A_68_P21110366 | chr2:31493479-31493523                            | NM_001123362:-2056      | Prdm12        | PROMOTER               | 1.179                                                        | 1.786                          | 1397.58            | 2496.15            | 2.105                          | 1209.03            | 2545.39            |
| A_68_P29605617 | chr14:52877185-52877229                           | NM_172601:21864         | Rab2b         | DOWNSTREAM             | 1.179                                                        | 1.397                          | 2622.90            | 3663.30            | 1.647                          | 2105.01            | 3466.29            |
| A_68_P20011684 | chr1:6205145-6205189                              | NM_009826:424           | Rblcc1        | INSIDE                 | 1.179                                                        | 1.886                          | 402.52             | 759.02             | 2.224                          | 360.74             | 802.11             |
| A_68_P28957533 | chr13:38023055-38023099                           | NM_001177869:42337      | Rreb1         | INSIDE                 | 1.179                                                        | 2.465                          | 1137.56            | 2804.27            | 2.907                          | 957.77             | 2784.12            |
| A_68_P21820793 | chr2:164793533-164793577                          | NM_020333:67            | Sle12a5       | INSIDE                 | 1.179                                                        | 1.665                          | 3206.47            | 5337.49            | 1.963                          | 2511.42            | 4930.66            |
| A_68_P27848100 | chr11:61191430-61191474                           | NM_026183:125           | Sle47a1       | INSIDE                 | 1.179                                                        | 2.168                          | 675.67             | 1464.89            | 2.556                          | 640.54             | 1637.46            |
| A_68_P29955473 | chr14:121778112-121778156                         | NM_145465:318           | Stk24         | INSIDE                 | 1.179                                                        | 1.922                          | 942.99             | 1812.06            | 2.265                          | 894.12             | 2024.94            |
| A_68_P32562270 | chrX:98255164-98255208                            | NM_031384:-208          | Tex11         | PROMOTER               | 1.179                                                        | 2.236                          | 1378.80            | 3082.92            | 2.637                          | 576.46             | 1520.01            |
| A_68_P23991123 | chr5:112705779-112705823                          | NM_009419:74            | Tpst2         | INSIDE                 | 1.179                                                        | 2.513                          | 759.96             | 1909.76            | 2.963                          | 687.45             | 2037.12            |
| A_68_P25663078 | chr8:12672178-12672222                            | NM_198031:-100          | Tube3p3       | PROMOTER               | 1.179                                                        | 1.896                          | 290.89             | 551.43             | 2.236                          | 246.83             | 551.84             |
| A_68_P32237968 | chrX:6896043-6896087                              | ENSMUST00000132126:232  |               | INSIDE                 | 1.179                                                        | 1.936                          | 528.59             | 1023.57            | 2.283                          | 379.29             | 865.96             |
| A_68_P30567433 | chr16:15887647-15887691                           | NM_007679:290           | Cebpδ         | INSIDE                 | 1.178                                                        | 0.523                          | 1530.76            | 800.83             | 0.617                          | 1133.01            | 698.52             |
| A_68_P25827831 | chr8:46095191-46095238                            | NM_001081286:59653      | Fat1          | INSIDE                 | 1.178                                                        | 2.745                          | 210.19             | 577.07             | 3.233                          | 197.04             | 637.04             |

| ProbeName      | Target position of probe on CpG island microarray | TargetID            | GeneSymbol    | CpG island Description | Ratio of relative methylation (TiO <sub>2</sub> -NP/Vehicle) | Sham group                     |                    |                    | TiO <sub>2</sub> -H group      |                    |                    |
|----------------|---------------------------------------------------|---------------------|---------------|------------------------|--------------------------------------------------------------|--------------------------------|--------------------|--------------------|--------------------------------|--------------------|--------------------|
|                |                                                   |                     |               |                        |                                                              | Relative methylation (Cy5/Cy3) | Cy3 signal (Input) | Cy5 signal (MeDIP) | Relative methylation (Cy5/Cy3) | Cy3 signal (Input) | Cy5 signal (MeDIP) |
| A_68_P26572465 | chr9:62659122-62659166                            | NM_010193:311       | Fem1b         | INSIDE                 | 1.178                                                        | 1.743                          | 2653.03            | 4623.82            | 2.054                          | 2281.84            | 4686.31            |
| A_68_P32745698 | chrX:147955401-147955445                          | NM_177201:208       | Phf8          | INSIDE                 | 1.178                                                        | 2.814                          | 562.00             | 1581.30            | 3.315                          | 362.33             | 1201.23            |
| A_68_P21431994 | chr2:92855345-92855389                            | NM_001177536:30935  | Prdm11        | INSIDE                 | 1.178                                                        | 1.386                          | 1167.56            | 1618.76            | 1.633                          | 1102.41            | 1800.08            |
| A_68_P28096908 | chr11:105451551-105451595                         | NM_181071:273       | Tanc2         | INSIDE                 | 1.178                                                        | 2.084                          | 3086.66            | 6433.49            | 2.455                          | 2486.33            | 6103.63            |
| A_68_P27798805 | chr11:52175093-52175137                           | NM_011694:498       | Vdac1         | INSIDE                 | 1.178                                                        | 0.536                          | 1313.28            | 703.50             | 0.631                          | 1043.15            | 658.33             |
| A_68_P31599638 | chr18:31963974-31964018                           | NM_001170966:286    | Wdr33         | INSIDE                 | 1.178                                                        | 1.648                          | 866.41             | 1427.64            | 1.942                          | 817.58             | 1587.44            |
| A_68_P28577649 | chr12:81891588-81891632                           | NM_178682:65        | 4933426M11Rik | INSIDE                 | 1.177                                                        | 1.454                          | 1063.69            | 1546.33            | 1.712                          | 989.54             | 1693.60            |
| A_68_P24160788 | chr5:145119007-145119051                          | NM_025833:-47       | Baiap211      | PROMOTER               | 1.177                                                        | 2.903                          | 2923.69            | 8488.36            | 3.417                          | 2530.79            | 8647.03            |
| A_68_P27170203 | chr10:59165375-59165419                           | NM_144822:14        | Cbara1        | INSIDE                 | 1.177                                                        | 1.810                          | 2896.74            | 5244.33            | 2.131                          | 2134.20            | 4548.60            |
| A_68_P21853424 | chr2:170322747-170322791                          | NM_009996:-130      | Cyp24a1       | PROMOTER               | 1.177                                                        | 1.871                          | 4193.27            | 7846.27            | 2.202                          | 3098.94            | 6822.80            |
| A_68_P20831242 | chr1:174078262-174078306                          | NM_153555:139       | Dcaf8         | INSIDE                 | 1.177                                                        | 2.111                          | 2711.99            | 5725.63            | 2.485                          | 2520.61            | 6262.84            |
| A_68_P31106387 | chr17:25946215-25946259                           | NM_001164225:207    | Fbx116        | INSIDE                 | 1.177                                                        | 3.750                          | 590.90             | 2215.86            | 4.414                          | 538.78             | 2378.10            |
| A_68_P31936769 | chr19:7008810-7008854                             | NM_008431:173       | Kenk4         | INSIDE                 | 1.177                                                        | 1.592                          | 2284.28            | 3637.05            | 1.874                          | 1926.29            | 3610.47            |
| A_68_P21077008 | chr2:26058081-26058125                            | NM_001039653:3974   | Lhx3          | INSIDE                 | 1.177                                                        | 1.999                          | 1203.82            | 2406.55            | 2.352                          | 1068.07            | 2512.45            |
| A_68_P27551861 | chr11:3309133-3309177                             | NM_010718:84        | Limk2         | INSIDE                 | 1.177                                                        | 1.784                          | 2180.04            | 3888.87            | 2.100                          | 1716.91            | 3606.21            |
| A_68_P24027257 | chr5:119011484-119011528                          | NM_172424:779       | Med131        | INSIDE                 | 1.177                                                        | 1.739                          | 1121.26            | 1949.53            | 2.047                          | 866.97             | 1774.75            |
| A_68_P20240461 | chr1:55187949-55187993                            | NM_025283:-118      | Mobk3         | PROMOTER               | 1.177                                                        | 1.892                          | 1017.01            | 1924.51            | 2.227                          | 902.22             | 2009.10            |
| A_68_P23430797 | chr4:153715735-153715779                          | NM_001177995:295226 | Prdm16        | INSIDE                 | 1.177                                                        | 4.816                          | 4127.11            | 19877.44           | 5.671                          | 3108.68            | 17628.89           |
| A_68_P25089827 | chr7:52125023-52125067                            | NM_133949:114       | Ptov1         | INSIDE                 | 1.177                                                        | 2.339                          | 1331.25            | 3114.42            | 2.753                          | 1224.34            | 3370.60            |
| A_68_P24464123 | chr6:54516358-54516402                            | NM_027268:-4        | Serpi1        | PROMOTER               | 1.177                                                        | 1.939                          | 1267.41            | 2457.38            | 2.282                          | 1200.89            | 2739.99            |
| A_68_P26983373 | chr10:19570476-19570520                           | NM_029529:767       | Slc35d3       | INSIDE                 | 1.177                                                        | 5.374                          | 1943.91            | 10446.65           | 6.327                          | 1830.25            | 11580.90           |
| A_68_P30479870 | chr15:99223391-99223435                           | NM_001171035:-237   | Tmbim6        | PROMOTER               | 1.177                                                        | 2.258                          | 2572.45            | 5808.41            | 2.657                          | 1754.23            | 4660.94            |
| A_68_P27286198 | chr10:80360560-80360604                           | NM_001081688:18022  | Tmprss9       | INSIDE                 | 1.177                                                        | 2.091                          | 1863.20            | 3896.65            | 2.462                          | 1467.24            | 3612.94            |
| A_68_P27636577 | chr11:21270655-21270699                           | NM_139297:206       | Ugp2          | INSIDE                 | 1.177                                                        | 18.291                         | 4294.76            | 78553.37           | 21.521                         | 3151.00            | 67811.32           |
| A_68_P30351142 | chr15:76742082-76742126                           | NM_001168276:13774  | Zfp647        | INSIDE                 | 1.177                                                        | 2.112                          | 683.51             | 1443.70            | 2.487                          | 546.51             | 1359.20            |
| A_68_P28724518 | chr12:109154385-109154429                         | NM_001079883:87218  | Bcl11b        | INSIDE                 | 1.176                                                        | 2.405                          | 3047.11            | 7327.36            | 2.828                          | 2396.16            | 6775.97            |
| A_68_P21821742 | chr2:164941702-164941746                          | NM_174988:118513    | Cdh22         | INSIDE                 | 1.176                                                        | 2.712                          | 2489.47            | 6752.49            | 3.189                          | 1734.16            | 5529.61            |
| A_68_P24818636 | chr6:125046050-125046094                          | NM_145979:-108      | Chd4          | PROMOTER               | 1.176                                                        | 2.328                          | 6303.65            | 14674.87           | 2.737                          | 4637.39            | 12692.72           |
| A_68_P26519505 | chr9:53055899-53055943                            | NM_029936:297       | Ddx10         | INSIDE                 | 1.176                                                        | 3.135                          | 8812.13            | 27625.80           | 3.687                          | 6282.21            | 23162.20           |
| A_68_P28925109 | chr13:31900260-31900304                           | NM_008592:1768      | Foxc1         | INSIDE                 | 1.176                                                        | 0.490                          | 2394.15            | 1172.73            | 0.576                          | 2210.88            | 1273.86            |
| A_68_P24052688 | chr5:123330338-123330382                          | NM_013910:19999     | Kdm2b         | INSIDE                 | 1.176                                                        | 2.162                          | 2575.04            | 5567.15            | 2.543                          | 2090.33            | 5315.33            |
| A_68_P28513753 | chr12:70397631-70397675                           | NM_027117:-15       | Klhdc2        | PROMOTER               | 1.176                                                        | 1.827                          | 1015.23            | 1854.31            | 2.147                          | 926.60             | 1989.82            |
| A_68_P22210771 | chr3:67386632-67386676                            | NM_025813:-35       | Mfsd1         | PROMOTER               | 1.176                                                        | 3.689                          | 840.82             | 3102.06            | 4.337                          | 618.77             | 2683.79            |
| A_68_P21904884 | chr2:180324017-180324061                          | NM_031373:-73       | Ogfr          | PROMOTER               | 1.176                                                        | 1.986                          | 1002.71            | 1991.18            | 2.336                          | 858.38             | 2005.34            |
| A_68_P24053485 | chr5:123465296-123465340                          | NM_175423:236       | Orai1         | INSIDE                 | 1.176                                                        | 3.759                          | 660.33             | 2482.04            | 4.421                          | 653.26             | 2887.93            |
| A_68_P32326382 | chrX:35474320-35474364                            | NM_001185002:326    | Rhox13        | INSIDE                 | 1.176                                                        | 2.115                          | 738.67             | 1562.32            | 2.487                          | 388.24             | 965.44             |
| A_68_P22324939 | chr3:90193494-90193538                            | NM_011988:333       | Slc27a3       | INSIDE                 | 1.176                                                        | 2.058                          | 965.88             | 1988.26            | 2.421                          | 937.30             | 2269.29            |
| A_68_P31056399 | chr17:13898251-13898295                           | NM_022311:129       | Tete2         | INSIDE                 | 1.176                                                        | 2.522                          | 2553.85            | 6439.65            | 2.967                          | 2185.59            | 6483.62            |
| A_68_P25032389 | chr7:31373349-31373393                            | NM_029274:375       | Wbp7          | INSIDE                 | 1.176                                                        | 1.721                          | 5578.90            | 9599.10            | 2.024                          | 4074.99            | 8248.28            |
| A_68_P28593636 | chr12:84937949-84937993                           | NM_183154:127       | Zfyve1        | INSIDE                 | 1.176                                                        | 1.501                          | 3434.07            | 5155.41            | 1.766                          | 3008.02            | 5312.60            |
| A_68_P21071713 | chr2:25228424-25228468                            | NM_001081085:606    | 2010317E24Rik | INSIDE                 | 1.175                                                        | 3.315                          | 480.47             | 1592.85            | 3.895                          | 435.00             | 1694.37            |
| A_68_P23391467 | chr4:147315560-147315604                          | NM_029841:579       | 2510039O18Rik | INSIDE                 | 1.175                                                        | 2.276                          | 1203.32            | 2738.18            | 2.674                          | 1099.53            | 2940.23            |
| A_68_P21900711 | chr2:179711603-179711647                          | NR_033782:67        | 4921531C22Rik | INSIDE                 | 1.175                                                        | 1.834                          | 3091.93            | 5670.25            | 2.154                          | 2597.42            | 5596.03            |
| A_68_P21346286 | chr2:75670175-75670220                            | NM_172666:-36       | Agps          | PROMOTER               | 1.175                                                        | 4.022                          | 1651.64            | 6643.53            | 4.726                          | 1444.21            | 6825.85            |
| A_68_P24816767 | chr6:124695514-124695558                          | NM_007881:10969     | Atn1          | INSIDE                 | 1.175                                                        | 2.735                          | 1605.21            | 4389.64            | 3.214                          | 1331.81            | 4280.50            |
| A_68_P31794502 | chr18:68093477-68093521                           | NM_172631:588       | D18Ert653e    | INSIDE                 | 1.175                                                        | 1.654                          | 2675.89            | 4424.72            | 1.942                          | 2205.60            | 4283.81            |
| A_68_P24123516 | chr5:137358920-137358964                          | NM_024474:35        | Emid2         | INSIDE                 | 1.175                                                        | 1.492                          | 1062.72            | 1585.22            | 1.753                          | 973.25             | 1706.07            |
| A_68_P31544268 | chr18:21458551-21458595                           | NM_001033445:68     | Fam59a        | INSIDE                 | 1.175                                                        | 1.876                          | 993.04             | 1862.59            | 2.204                          | 813.80             | 1793.40            |
| A_68_P26761427 | chr9:98856071-98856115                            | NM_012020:67        | Foxl2         | INSIDE                 | 1.175                                                        | 2.878                          | 1162.33            | 3345.53            | 3.382                          | 974.36             | 3294.88            |
| A_68_P22248625 | chr3:75760605-75760649                            | NM_175193:127       | Golim4        | INSIDE                 | 1.175                                                        | 1.576                          | 1553.47            | 2448.55            | 1.851                          | 1182.10            | 2188.51            |
| A_68_P31425150 | chr17:88196845-88196889                           | NM_199251:468       | Kenk12        | INSIDE                 | 1.175                                                        | 2.834                          | 594.01             | 1683.27            | 3.329                          | 584.56             | 1945.98            |

| ProbeName       | Target position of probe on CpG island microarray | TargetID                   | GeneSymbol    | CpG island Description | Ratio of relative methylation (TiO <sub>2</sub> -NP/Vehicle) | Sham group                     |                    |                    | TiO <sub>2</sub> -H group      |                    |                    |
|-----------------|---------------------------------------------------|----------------------------|---------------|------------------------|--------------------------------------------------------------|--------------------------------|--------------------|--------------------|--------------------------------|--------------------|--------------------|
|                 |                                                   |                            |               |                        |                                                              | Relative methylation (Cy5/Cy3) | Cy3 signal (Input) | Cy5 signal (MeDIP) | Relative methylation (Cy5/Cy3) | Cy3 signal (Input) | Cy5 signal (MeDIP) |
| A_68_P26811597  | chr9:107790348-107790392                          | NM_028369:-89              | Mon1a         | PROMOTER               | 1.175                                                        | 1.496                          | 674.87             | 1009.67            | 1.758                          | 556.77             | 979.04             |
| A_68_P21351542  | chr2:76486311-76486355                            | NM_011871:-281             | Prkra         | DIVERGENT_PROMOTER     | 1.175                                                        | 2.351                          | 3629.28            | 8530.82            | 2.762                          | 2854.07            | 7882.19            |
| A_68_P22405721  | chr3:107137047-107137091                          | NM_001045807:-861          | Rbm15         | PROMOTER               | 1.175                                                        | 1.853                          | 658.70             | 1220.27            | 2.177                          | 654.33             | 1424.52            |
| A_68_P21078764  | chr2:26300667-26300711                            | NM_153125:48               | Sec16a        | INSIDE                 | 1.175                                                        | 3.699                          | 2327.97            | 8611.71            | 4.347                          | 1921.31            | 8352.09            |
| A_68_P32320134  | chrX:34335518-34335562                            | NM_007451:-106             | Slc25a5       | PROMOTER               | 1.175                                                        | 1.383                          | 1384.81            | 1915.45            | 1.625                          | 857.68             | 1393.69            |
| A_68_P31058955  | chr17:14417592-14417636                           | NM_022315:1102             | Smoc2         | INSIDE                 | 1.175                                                        | 1.933                          | 1349.92            | 2609.07            | 2.271                          | 1247.15            | 2832.86            |
| A_68_P24663948  | chr6:95668305-95668349                            | NM_011507:505              | Suclg2        | INSIDE                 | 1.175                                                        | 1.811                          | 758.30             | 1372.99            | 2.128                          | 625.67             | 1331.39            |
| A_68_P30595261  | chr16:21947632-21947676                           | NM_025693:-29              | Tmem41a       | PROMOTER               | 1.175                                                        | 2.319                          | 1071.51            | 2484.48            | 2.724                          | 928.62             | 2529.91            |
| A_68_P30023613  | chr15:12669624-12669668                           | ENSMUST00000096893:33      |               | INSIDE                 | 1.175                                                        | 4.322                          | 408.86             | 1767.12            | 5.079                          | 375.46             | 1907.07            |
| A_68_P26225640  | chr8:123797224-123797270                          | ENSMUST00000127664:1362506 |               | INSIDE                 | 1.175                                                        | 3.168                          | 620.19             | 1964.88            | 3.724                          | 516.68             | 1924.10            |
| A_68_P22082007  | chr3:40698419-40698463                            | NM_026622:242              | 3110057O12Rik | INSIDE                 | 1.174                                                        | 1.574                          | 597.20             | 939.78             | 1.847                          | 535.28             | 988.92             |
| A_68_P25354430  | chr7:105342884-105342928                          | NM_001081167:5079          | B3gnt6        | INSIDE                 | 1.174                                                        | 2.240                          | 405.30             | 907.91             | 2.629                          | 372.63             | 979.71             |
| A_68_P20329006  | chr1:71149346-71149390                            | NM_007525:178              | Bard1         | INSIDE                 | 1.174                                                        | 1.798                          | 999.83             | 1797.81            | 2.111                          | 995.65             | 2102.21            |
| A_68_P26236468  | chr8:125388849-125388893                          | NM_007662:16597            | Cdh15         | INSIDE                 | 1.174                                                        | 1.539                          | 844.80             | 1299.78            | 1.806                          | 749.67             | 1354.25            |
| A_68_P25009389  | chr7:26063544-26063588                            | NM_001110131:-3631         | Cic           | PROMOTER               | 1.174                                                        | 2.985                          | 1331.06            | 3972.77            | 3.505                          | 1095.19            | 3839.02            |
| A_68_P29455231  | chr14:22667975-22668019                           | NM_026965:136              | Comtd1        | INSIDE                 | 1.174                                                        | 2.696                          | 15959.49           | 43034.38           | 3.165                          | 13321.09           | 42167.36           |
| A_68_P23203754  | chr4:109653015-109653059                          | NM_172296:2407             | Dmrta2        | INSIDE                 | 1.174                                                        | 1.562                          | 2790.54            | 4358.82            | 1.834                          | 2191.03            | 4019.43            |
| A_68_P31343015  | chr17:73268700-73268744                           | NM_029999:1078             | Lbh           | INSIDE                 | 1.174                                                        | 1.550                          | 1411.15            | 2187.14            | 1.820                          | 1173.68            | 2135.68            |
| A_68_P31601518  | chr18:32322635-32322679                           | NM_011946:-86              | Map3k2        | PROMOTER               | 1.174                                                        | 2.837                          | 510.27             | 1447.68            | 3.330                          | 529.79             | 1764.37            |
| A_68_P22898222  | chr4:48064747-48064791                            | NM_015743:649              | Nr4a3         | INSIDE                 | 1.174                                                        | 2.191                          | 2419.99            | 5301.69            | 2.571                          | 1900.45            | 4886.03            |
| A_68_P22309969  | chr3:87587605-87587650                            | NM_001033124:11457         | Ntrk1         | INSIDE                 | 1.174                                                        | 2.652                          | 400.59             | 1062.18            | 3.114                          | 355.54             | 1107.04            |
| A_68_P29471619  | chr14:25306273-25306317                           | NM_001081247:-26           | Polr3a        | DIVERGENT_PROMOTER     | 1.174                                                        | 1.551                          | 624.42             | 968.48             | 1.820                          | 553.74             | 1007.87            |
| A_68_P26044775  | chr8:91565596-91565640                            | NM_021390:2443             | Sall1         | INSIDE                 | 1.174                                                        | 1.454                          | 2192.95            | 3188.24            | 1.706                          | 1881.28            | 3210.37            |
| A_68_P22338877  | chr3:94217455-94217499                            | NM_028307:237              | Tdrkh         | INSIDE                 | 1.174                                                        | 1.939                          | 5021.73            | 9735.26            | 2.275                          | 3385.58            | 7702.92            |
| A_68_P24776845  | chr6:116411172-116411216                          | NM_009662:2                | Alox5         | INSIDE                 | 1.173                                                        | 2.585                          | 1718.19            | 4441.70            | 3.033                          | 1492.39            | 4526.74            |
| A_68_P25756352  | chr8:32261404-32261448                            | NM_144927:639              | BC019943      | INSIDE                 | 1.173                                                        | 2.060                          | 437.02             | 900.07             | 2.416                          | 377.37             | 911.55             |
| A_68_P26346396  | chr9:21095892-21095936                            | NM_009878:-261             | Cdkn2d        | PROMOTER               | 1.173                                                        | 2.361                          | 291.74             | 688.84             | 2.769                          | 256.26             | 709.62             |
| A_68_P24817997  | chr6:124915301-124915345                          | NM_012003:93               | Cops7a        | INSIDE                 | 1.173                                                        | 1.540                          | 3010.61            | 4637.26            | 1.806                          | 2495.11            | 4506.97            |
| A_68_P30082169  | chr15:25552086-25552130                           | NM_019472:-196             | Myo10         | PROMOTER               | 1.173                                                        | 3.038                          | 16835.81           | 51145.46           | 3.564                          | 9923.02            | 35369.00           |
| A_68_P30094309  | chr15:27677579-27677623                           | NM_001081302:278003        | Trio          | INSIDE                 | 1.173                                                        | 3.190                          | 1948.03            | 6215.01            | 3.742                          | 1440.71            | 5391.71            |
| A_68_P23692818  | chr5:52505349-52505393                            | AK076709:-3181             |               | PROMOTER               | 1.173                                                        | 1.986                          | 1069.74            | 2124.12            | 2.330                          | 1094.81            | 2550.44            |
| A_68_P23819409  | chr5:77445107-77445151                            | NM_027970:81               | 1700023E05Rik | INSIDE                 | 1.172                                                        | 2.182                          | 1709.35            | 3729.44            | 2.558                          | 1432.96            | 3665.36            |
| A_68_P27996046  | chr11:87578150-87578194                           | NM_172449:4130             | Bzap1         | INSIDE                 | 1.172                                                        | 1.607                          | 903.83             | 1452.83            | 1.884                          | 843.58             | 1589.08            |
| A_68_P27315614  | chr10:86168270-86168314                           | NM_011631:-103             | Hsp90b1       | DIVERGENT_PROMOTER     | 1.172                                                        | 1.377                          | 4402.15            | 6062.93            | 1.614                          | 3113.80            | 5025.96            |
| A_68_P28099477  | chr11:105946015-105946059                         | NM_011947:-179             | Map3k3        | PROMOTER               | 1.172                                                        | 2.104                          | 800.72             | 1685.03            | 2.467                          | 712.88             | 1758.86            |
| A_68_P225957202 | chr8:74031641-74031685                            | NM_032398:4006             | Plvap         | INSIDE                 | 1.172                                                        | 1.827                          | 338.17             | 617.81             | 2.140                          | 306.47             | 656.00             |
| A_68_P30479249  | chr15:99125815-99125859                           | NM_018786:-3               | Prpf40b       | DIVERGENT_PROMOTER     | 1.172                                                        | 2.164                          | 4875.43            | 10549.88           | 2.535                          | 3676.80            | 9321.97            |
| A_68_P20410046  | chr1:87961433-87961477                            | NM_027357:261              | Psmc1         | INSIDE                 | 1.172                                                        | 1.858                          | 1165.07            | 2164.95            | 2.179                          | 1015.82            | 2213.19            |
| A_68_P29507209  | chr14:31467715-31467759                           | NM_177815:176              | Rft1          | INSIDE                 | 1.172                                                        | 2.007                          | 760.90             | 1527.20            | 2.352                          | 731.05             | 1719.45            |
| A_68_P22871711  | chr4:43454970-43455014                            | NM_011571:-156             | Tesk1         | PROMOTER               | 1.172                                                        | 1.521                          | 1802.41            | 2741.86            | 1.782                          | 1492.29            | 2659.59            |
| A_68_P30657576  | chr16:33380868-33380912                           | NM_011749:30               | Zfp148        | INSIDE                 | 1.172                                                        | 1.592                          | 553.78             | 881.68             | 1.866                          | 507.34             | 946.92             |
| A_68_P31156110  | A_68_P31156110                                    |                            | Unknown       |                        | 1.172                                                        | 2.907                          | 307.77             | 894.64             | 3.406                          | 290.75             | 990.41             |
| A_68_P24043268  | chr5:121670665-121670709                          | ENSMUST00000119892:459     |               | INSIDE                 | 1.172                                                        | 2.367                          | 886.12             | 2097.88            | 2.775                          | 735.38             | 2040.82            |
| A_68_P24798987  | chr6:120481227-120481271                          | NM_144815:69               | Cecr5         | INSIDE                 | 1.171                                                        | 2.505                          | 1351.25            | 3384.32            | 2.933                          | 1147.76            | 3366.51            |
| A_68_P27281433  | chr10:79630600-79630644                           | NM_007705:37               | Cirbp         | INSIDE                 | 1.171                                                        | 2.359                          | 1774.83            | 4186.77            | 2.763                          | 1355.97            | 3746.92            |
| A_68_P26841770  | chr9:113650921-113650965                          | NM_001114347:352           | Clasp2        | INSIDE                 | 1.171                                                        | 1.780                          | 575.59             | 1024.84            | 2.085                          | 553.87             | 1154.56            |
| A_68_P28185233  | chr11:120410651-120410695                         | NM_001033231:369           | Fam195b       | INSIDE                 | 1.171                                                        | 5.275                          | 2908.91            | 15344.37           | 6.175                          | 2105.91            | 13004.68           |
| A_68_P28054695  | chr11:98011746-98011790                           | NM_028149:-838             | Fbxl20        | PROMOTER               | 1.171                                                        | 2.520                          | 907.52             | 2286.60            | 2.950                          | 885.19             | 2611.29            |
| A_68_P21339003  | chr2:74549994-74550038                            | NM_010468:-33              | Hoxd3         | PROMOTER               | 1.171                                                        | 4.305                          | 423.13             | 1821.49            | 5.043                          | 413.21             | 2083.60            |
| A_68_P27470617  | chr10:115024975-115025019                         | NM_010195:-160             | Lgr5          | PROMOTER               | 1.171                                                        | 2.026                          | 1166.86            | 2364.64            | 2.374                          | 965.12             | 2291.21            |
| A_68_P26580973  | chr9:64101378-64101422                            | NM_008927:12               | Map2k1        | INSIDE                 | 1.171                                                        | 2.516                          | 653.51             | 1644.18            | 2.947                          | 653.18             | 1924.87            |

| ProbeName      | Target position of probe on CpG island microarray | TargetID           | GeneSymbol    | CpG island Description | Ratio of relative methylation (TiO <sub>2</sub> -NP/Vehicle) | Sham group                     |                    |                    | TiO <sub>2</sub> -H group      |                    |                    |
|----------------|---------------------------------------------------|--------------------|---------------|------------------------|--------------------------------------------------------------|--------------------------------|--------------------|--------------------|--------------------------------|--------------------|--------------------|
|                |                                                   |                    |               |                        |                                                              | Relative methylation (Cy5/Cy3) | Cy3 signal (Input) | Cy5 signal (MeDIP) | Relative methylation (Cy5/Cy3) | Cy3 signal (Input) | Cy5 signal (MeDIP) |
| A_68_P31158451 | chr17:35371961-35372005                           | NM_010909:778      | Nfkbl1        | INSIDE                 | 1.171                                                        | 6.490                          | 6156.92            | 39955.50           | 7.596                          | 4445.24            | 33768.05           |
| A_68_P30343472 | chr15:75534891-75534935                           | NM_001163465:195   | Rhpn1         | INSIDE                 | 1.171                                                        | 1.559                          | 1227.30            | 1913.77            | 1.826                          | 991.26             | 1810.51            |
| A_68_P27284271 | chr10:80069708-80069752                           | NM_019575:4104     | Scamp4        | INSIDE                 | 1.171                                                        | 2.566                          | 1122.20            | 2879.64            | 3.004                          | 872.37             | 2620.38            |
| A_68_P25092755 | chr7:52631986-52632030                            | NM_009224:19009    | Snrnp70       | INSIDE                 | 1.171                                                        | 5.045                          | 1420.34            | 7165.66            | 5.906                          | 1160.11            | 6851.10            |
| A_68_P24974188 | chr7:13609447-13609491                            | NM_011588:-32      | Trim28        | PROMOTER               | 1.171                                                        | 10.235                         | 957.80             | 9803.35            | 11.981                         | 634.32             | 7599.91            |
| A_68_P21781777 | chr2:158055194-158055238                          | NM_001131021:-258  | D630003M21Rik | PROMOTER               | 1.170                                                        | 1.945                          | 911.27             | 1772.15            | 2.276                          | 924.04             | 2102.71            |
| A_68_P31065253 | chr17:15511986-15512030                           | NM_007865:779      | Dll1          | INSIDE                 | 1.170                                                        | 2.302                          | 597.27             | 1375.18            | 2.695                          | 534.13             | 1439.26            |
| A_68_P29247524 | chr13:97440758-97440802                           | NM_008255:111      | Hmgcr         | INSIDE                 | 1.170                                                        | 1.987                          | 621.79             | 1235.56            | 2.324                          | 585.32             | 1360.45            |
| A_68_P21309976 | chr2:69423831-69423875                            | NM_001081088:272   | Lrp2          | INSIDE                 | 1.170                                                        | 1.522                          | 547.70             | 833.67             | 1.781                          | 478.90             | 852.87             |
| A_68_P32385500 | chrX:50410153-50410197                            | NR_029756:-2648    | Mir322        | PROMOTER               | 1.170                                                        | 4.313                          | 8848.37            | 38161.07           | 5.048                          | 4339.45            | 21905.66           |
| A_68_P22209749 | chr3:67178298-67178342                            | NM_001039543:302   | Mif1          | INSIDE                 | 1.170                                                        | 3.526                          | 1301.46            | 4589.44            | 4.126                          | 912.46             | 3765.06            |
| A_68_P27708457 | chr11:35583330-35583374                           | NM_145962:356      | Pank3         | INSIDE                 | 1.170                                                        | 2.292                          | 488.97             | 1120.79            | 2.682                          | 449.18             | 1204.82            |
| A_68_P25908468 | chr8:63703117-63703161                            | NM_021506:171      | Sh3rf1        | INSIDE                 | 1.170                                                        | 2.328                          | 1964.55            | 4573.12            | 2.723                          | 1756.40            | 4783.53            |
| A_68_P30366259 | chr15:79233437-79233481                           | NM_172608:275      | Tmem184b      | INSIDE                 | 1.170                                                        | 1.995                          | 1749.87            | 3491.67            | 2.335                          | 1513.75            | 3534.59            |
| A_68_P22856569 | chr4:40215391-40215435                            | NM_134097:1462     | Topors        | INSIDE                 | 1.170                                                        | 2.390                          | 438.18             | 1047.15            | 2.796                          | 526.87             | 1472.93            |
| A_68_P22372024 | chr3:100726413-100726457                          | NM_001165953:19    | Trim45        | INSIDE                 | 1.170                                                        | 1.685                          | 1086.90            | 1831.42            | 1.971                          | 855.83             | 1687.00            |
| A_68_P20820922 | chr1:172105070-172105114                          | NM_133806:-15      | Uap1          | PROMOTER               | 1.170                                                        | 2.249                          | 1284.18            | 2888.59            | 2.632                          | 1193.52            | 3141.16            |
| A_68_P27287713 | chr10:80611280-80611324                           | NM_010731:12287    | Zbtb7a        | INSIDE                 | 1.170                                                        | 3.948                          | 3896.85            | 15386.58           | 4.619                          | 2916.87            | 13473.78           |
| A_68_P24951459 | chr7:4945480-4945524                              | NM_026741:2201     | Zfp579        | INSIDE                 | 1.170                                                        | 2.055                          | 1189.59            | 2445.08            | 2.404                          | 912.48             | 2193.44            |
| A_68_P27282448 | chr10:79783216-79783260                           | NM_025521:55       | 2310011J03Rik | INSIDE                 | 1.169                                                        | 1.578                          | 1045.47            | 1649.40            | 1.845                          | 762.14             | 1405.83            |
| A_68_P28724526 | chr12:109155259-109155303                         | NM_001079883:86344 | Bcl11b        | INSIDE                 | 1.169                                                        | 2.975                          | 2007.04            | 5971.63            | 3.477                          | 1626.65            | 5655.68            |
| A_68_P24735103 | chr6:108609619-108609663                          | NM_011498:-982     | Bhlhe40       | PROMOTER               | 1.169                                                        | 1.528                          | 1307.76            | 1998.29            | 1.786                          | 1253.00            | 2237.58            |
| A_68_P22019968 | chr3:28981553-28981597                            | NM_001167748:76    | Egfm1         | INSIDE                 | 1.169                                                        | 2.778                          | 604.99             | 1680.69            | 3.248                          | 488.45             | 1586.50            |
| A_68_P22843581 | chr4:36898671-36898715                            | NM_001165999:85    | Lingo2        | INSIDE                 | 1.169                                                        | 1.717                          | 4110.15            | 7055.25            | 2.007                          | 3340.56            | 6704.30            |
| A_68_P24117100 | chr5:136108637-136108681                          | NM_146002:135      | Rhbdd2        | INSIDE                 | 1.169                                                        | 1.574                          | 1408.35            | 2216.47            | 1.841                          | 1233.96            | 2271.16            |
| A_68_P26745887 | chr9:96096585-96096629                            | NM_001184706:-87   | Tfdp2         | PROMOTER               | 1.169                                                        | 2.006                          | 1202.81            | 2412.23            | 2.344                          | 1018.95            | 2388.52            |
| A_68_P29225757 | chr13:93564876-93564920                           | NM_011582:-125     | Tbhs4         | PROMOTER               | 1.169                                                        | 1.814                          | 2878.95            | 5221.48            | 2.120                          | 2240.45            | 4750.73            |
| A_68_P29052393 | chr13:55057473-55057517                           | NM_153131:6702     | Unc5a         | INSIDE                 | 1.169                                                        | 1.916                          | 2710.68            | 5193.47            | 2.240                          | 2155.21            | 4827.54            |
| A_68_P27281235 | chr10:79605180-79605224                           | NM_025313:143      | Atp5d         | INSIDE                 | 1.168                                                        | 1.399                          | 2343.57            | 3277.90            | 1.634                          | 1722.01            | 2813.61            |
| A_68_P26528581 | chr9:54798811-54798855                            | NM_145229:-71      | A0Y074887     | PROMOTER               | 1.168                                                        | 3.821                          | 432.71             | 1653.22            | 4.464                          | 375.19             | 1674.78            |
| A_68_P21906145 | chr2:180511577-180511621                          | NM_080641:7        | Bhlhe23       | INSIDE                 | 1.168                                                        | 3.176                          | 1016.80            | 3228.86            | 3.709                          | 938.50             | 3480.51            |
| A_68_P31103375 | chr17:25522729-25522773                           | NM_001163691:47978 | Caena1h       | INSIDE                 | 1.168                                                        | 7.111                          | 2787.64            | 19822.74           | 8.305                          | 2027.47            | 16837.58           |
| A_68_P31106875 | chr17:26005655-26005699                           | NM_026633:7        | Fam195a       | INSIDE                 | 1.168                                                        | 1.552                          | 1377.19            | 2137.56            | 1.813                          | 1187.50            | 2153.50            |
| A_68_P20819671 | chr1:171899591-171899635                          | NM_010476:-276     | Hsd17b7       | PROMOTER               | 1.168                                                        | 1.597                          | 633.28             | 1011.18            | 1.866                          | 492.61             | 919.04             |
| A_68_P27806466 | chr11:53583987-53584031                           | NM_001159396:34    | Irf1          | INSIDE                 | 1.168                                                        | 3.227                          | 649.35             | 2095.55            | 3.768                          | 517.44             | 1949.59            |
| A_68_P28036508 | chr11:94937511-94937555                           | NM_013565:496      | Itga3         | INSIDE                 | 1.168                                                        | 2.307                          | 406.22             | 936.96             | 2.695                          | 311.03             | 838.11             |
| A_68_P25362046 | chr7:106617483-106617527                          | NM_028145:2991     | Klhl35        | INSIDE                 | 1.168                                                        | 6.002                          | 474.79             | 2849.66            | 7.011                          | 377.26             | 2645.16            |
| A_68_P21826984 | chr2:165818646-165818690                          | NM_008679:532      | Ncoa3         | INSIDE                 | 1.168                                                        | 6.635                          | 13235.85           | 87819.52           | 7.746                          | 8271.53            | 64074.80           |
| A_68_P24119777 | chr5:136646370-136646414                          | NM_178751:134      | Orai2         | INSIDE                 | 1.168                                                        | 2.450                          | 2503.77            | 6134.38            | 2.861                          | 2280.77            | 6526.27            |
| A_68_P31626159 | chr18:37091821-37091865                           | NM_198117:-7016    | Pcdha2        | PROMOTER               | 1.168                                                        | 2.249                          | 717.03             | 1612.58            | 2.627                          | 574.12             | 1508.33            |
| A_68_P31207759 | chr17:46728766-46728810                           | NM_175168:37665    | Ptk7          | INSIDE                 | 1.168                                                        | 6.175                          | 701.98             | 4334.54            | 7.211                          | 650.35             | 4689.63            |
| A_68_P20871442 | chr1:181598207-181598251                          | NM_178653:-133     | Scpdp         | PROMOTER               | 1.168                                                        | 3.031                          | 1098.04            | 3327.82            | 3.540                          | 980.73             | 3472.20            |
| A_68_P28726325 | chr12:109417342-109417386                         | NM_028262:130      | Setd3         | INSIDE                 | 1.168                                                        | 4.935                          | 671.05             | 3311.79            | 5.765                          | 904.36             | 5213.30            |
| A_68_P23437238 | chr4:154596264-154596308                          | NM_011385:358      | Ski           | INSIDE                 | 1.168                                                        | 0.435                          | 1575.44            | 684.98             | 0.508                          | 1205.52            | 612.25             |
| A_68_P27286997 | chr10:80493927-80493971                           | NM_134135:2709     | Stc39a3       | INSIDE                 | 1.168                                                        | 2.052                          | 1488.23            | 3054.04            | 2.396                          | 1327.30            | 3180.33            |
| A_68_P23694282 | chr5:52759804-52759848                            | NM_011435:4784     | Sod3          | INSIDE                 | 1.168                                                        | 1.736                          | 506.10             | 878.76             | 2.028                          | 389.37             | 789.52             |
| A_68_P25183831 | chr7:72789891-72789935                            | NM_172310:129      | Tars12        | INSIDE                 | 1.168                                                        | 1.987                          | 379.50             | 753.98             | 2.320                          | 347.16             | 805.30             |
| A_68_P25049869 | chr7:36322564-36322608                            | NM_028034:177      | Tdrd12        | INSIDE                 | 1.168                                                        | 2.954                          | 1133.07            | 3346.67            | 3.451                          | 966.03             | 3333.35            |
| A_68_P21394207 | chr2:84555063-84555107                            | NM_144887:237      | Zdhhc5        | INSIDE                 | 1.168                                                        | 1.569                          | 2698.58            | 4235.31            | 1.834                          | 2214.63            | 4061.16            |
| A_68_P26154270 | chr8:111471142-111471186                          | NM_007496:232621   | Zfx3          | INSIDE                 | 1.168                                                        | 2.752                          | 1731.08            | 4763.11            | 3.214                          | 1537.66            | 4941.51            |
| A_68_P21844345 | chr2:168780474-168780518                          | NM_009564:591      | Zfp64         | INSIDE                 | 1.168                                                        | 1.868                          | 1000.90            | 1869.68            | 2.181                          | 927.33             | 2022.89            |



| ProbeName      | Target position of probe on CpG island microarray | TargetID                 | GeneSymbol    | CpG island Description | Ratio of relative methylation (TiO <sub>2</sub> -NP/Vehicle) | Sham group                     |                    |                    |                                | TiO <sub>2</sub> -H group |                    |  |
|----------------|---------------------------------------------------|--------------------------|---------------|------------------------|--------------------------------------------------------------|--------------------------------|--------------------|--------------------|--------------------------------|---------------------------|--------------------|--|
|                |                                                   |                          |               |                        |                                                              | Relative methylation (Cy5/Cy3) | Cy3 signal (Input) | Cy5 signal (MeDIP) | Relative methylation (Cy5/Cy3) | Cy3 signal (Input)        | Cy5 signal (MeDIP) |  |
| A_68_P24428352 | chr6:48570342-48570386                            | NM_173429:7186           | Zfp775        | INSIDE                 | 1.168                                                        | 2.564                          | 241.84             | 619.97             | 2.995                          | 209.69                    | 628.03             |  |
| A_68_P26240063 | A_68_P26240063                                    |                          |               | Unknown                | 1.168                                                        | 2.955                          | 629.58             | 1860.64            | 3.451                          | 522.78                    | 1804.31            |  |
| A_68_P29625000 | chr14:57484103-57484147                           | AK209334:-600            |               | PROMOTER               | 1.168                                                        | 1.832                          | 1452.19            | 2660.45            | 2.140                          | 1092.17                   | 2337.65            |  |
| A_68_P29090576 | chr13:63066071-63066115                           | ENSMUST00000170896:-160  |               | PROMOTER               | 1.168                                                        | 5.055                          | 1004.60            | 5078.19            | 5.903                          | 870.98                    | 5141.53            |  |
| A_68_P22311243 | chr3:87803866-87803910                            | NM_007529:390            | Bean          | INSIDE                 | 1.167                                                        | 1.480                          | 1001.50            | 1482.50            | 1.728                          | 839.77                    | 1451.22            |  |
| A_68_P20561482 | chr1:122238470-122238514                          | NM_207233:1334           | C1ql2         | INSIDE                 | 1.167                                                        | 2.067                          | 2220.70            | 4589.35            | 2.412                          | 1710.42                   | 4125.26            |  |
| A_68_P32670209 | chrX:130594062-130594106                          | NM_133196:197            | Cstf2         | INSIDE                 | 1.167                                                        | 2.180                          | 771.48             | 1681.60            | 2.545                          | 479.05                    | 1218.98            |  |
| A_68_P28069094 | chr11:100480931-100480975                         | NM_019795:530            | Dnajc7        | INSIDE                 | 1.167                                                        | 1.629                          | 2233.29            | 3637.65            | 1.901                          | 1724.85                   | 3278.49            |  |
| A_68_P26885391 | chr9:121669059-121669103                          | NR_033503:-19            | E530011L22Rik | DIVERGENT_PROMOTER     | 1.167                                                        | 1.499                          | 684.62             | 1026.23            | 1.749                          | 664.94                    | 1162.84            |  |
| A_68_P21071367 | chr2:25174641-25174685                            | NM_001177656:21          | Grin1         | INSIDE                 | 1.167                                                        | 0.389                          | 1355.28            | 527.85             | 0.454                          | 1194.69                   | 542.84             |  |
| A_68_P28152361 | chr11:115119374-115119418                         | NM_010350:9161           | Grin2c        | INSIDE                 | 1.167                                                        | 2.191                          | 1420.38            | 3111.90            | 2.557                          | 1285.03                   | 3285.26            |  |
| A_68_P30339717 | chr15:74630092-74630141                           | NM_029627:282            | Ly6k          | INSIDE                 | 1.167                                                        | 4.372                          | 698.14             | 3052.55            | 5.103                          | 564.33                    | 2879.52            |  |
| A_68_P24613352 | chr6:86959758-86959802                            | NM_001170591:-49         | Nfu1          | PROMOTER               | 1.167                                                        | 4.595                          | 2845.89            | 13077.41           | 5.363                          | 2377.80                   | 12751.89           |  |
| A_68_P28058395 | chr11:98629793-98629837                           | NM_145434:6742           | Nr1d1         | INSIDE                 | 1.167                                                        | 3.396                          | 1062.87            | 3609.55            | 3.962                          | 842.93                    | 3340.04            |  |
| A_68_P28802627 | chr13:6547373-6547417                             | NM_145131:-8             | Pitrm1        | PROMOTER               | 1.167                                                        | 1.505                          | 2063.02            | 3105.60            | 1.757                          | 1640.16                   | 2882.03            |  |
| A_68_P26079046 | chr8:97219612-97219656                            | NM_026385:508            | Plp1          | INSIDE                 | 1.167                                                        | 2.656                          | 870.94             | 2313.17            | 3.099                          | 776.48                    | 2406.25            |  |
| A_68_P25089777 | chr7:52119118-52119162                            | NM_133949:6018           | Ptov1         | INSIDE                 | 1.167                                                        | 1.956                          | 2459.03            | 4808.72            | 2.282                          | 2127.62                   | 4854.25            |  |
| A_68_P28159202 | chr11:116274533-116274577                         | NM_027258:-208           | Rnf157        | PROMOTER               | 1.167                                                        | 1.474                          | 1007.94            | 1485.30            | 1.720                          | 877.84                    | 1510.09            |  |
| A_68_P31738728 | chr18:58037843-58037887                           | NM_009194:-467           | Stc12a2       | PROMOTER               | 1.167                                                        | 2.167                          | 1231.22            | 2668.08            | 2.528                          | 1280.23                   | 3236.80            |  |
| A_68_P24771682 | chr6:115494959-115495004                          | NM_199033:260            | Tsen2         | INSIDE                 | 1.167                                                        | 2.768                          | 405.89             | 1123.44            | 3.231                          | 315.88                    | 1020.68            |  |
| A_68_P23334946 | chr4:136194010-136194054                          | ENSMUST00000146123:15526 |               | DOWNSTREAM             | 1.167                                                        | 1.990                          | 610.95             | 1215.51            | 2.322                          | 582.43                    | 1352.40            |  |
| A_68_P22169031 | chr3:58381260-58381314                            | NM_001040396:707         | 2810407C02Rik | INSIDE                 | 1.166                                                        | 1.598                          | 622.06             | 993.85             | 1.863                          | 477.32                    | 889.12             |  |
| A_68_P28182974 | chr11:120050877-120050921                         | NR_030682:272            | 2810410L24Rik | INSIDE                 | 1.166                                                        | 7.043                          | 915.25             | 6446.36            | 8.209                          | 767.59                    | 6301.25            |  |
| A_68_P31925522 | chr19:4867768-4867812                             | NM_013456:10094          | Actn3         | INSIDE                 | 1.166                                                        | 2.112                          | 1914.48            | 4044.22            | 2.462                          | 1467.45                   | 3613.51            |  |
| A_68_P24994775 | chr7:20282050-20282094                            | NM_009696:2443           | Apoe          | INSIDE                 | 1.166                                                        | 2.448                          | 987.41             | 2416.97            | 2.854                          | 862.79                    | 2461.98            |  |
| A_68_P21754299 | chr2:153171488-153171547                          | NM_001039939:-357        | Asx1          | PROMOTER               | 1.166                                                        | 3.197                          | 254.38             | 813.28             | 3.726                          | 235.13                    | 876.21             |  |
| A_68_P20740948 | chr1:157820278-157820322                          | NM_001039184:85          | Cep350        | INSIDE                 | 1.166                                                        | 2.097                          | 890.49             | 1866.95            | 2.444                          | 902.34                    | 2205.19            |  |
| A_68_P25368311 | chr7:107685728-107685772                          | NM_183270:137            | Chchd8        | INSIDE                 | 1.166                                                        | 2.320                          | 1049.99            | 2435.87            | 2.704                          | 1152.50                   | 3116.64            |  |
| A_68_P20166303 | chr1:39593180-39593224                            | NM_028043:556            | D1Bwg0212e    | INSIDE                 | 1.166                                                        | 3.176                          | 494.81             | 1571.64            | 3.703                          | 461.40                    | 1708.52            |  |
| A_68_P20600406 | chr1:130314008-130314052                          | NM_177445:-37            | Dars          | PROMOTER               | 1.166                                                        | 2.678                          | 1238.05            | 3315.33            | 3.122                          | 990.98                    | 3093.92            |  |
| A_68_P33015610 | chr1_random:49416-49460                           | NM_026866:135900         | Disp1         | INSIDE                 | 1.166                                                        | 2.435                          | 569.47             | 1386.91            | 2.841                          | 520.89                    | 1479.79            |  |
| A_68_P22872021 | chr4:43512609-43512653                            | NM_001013377:-98         | E130306D19Rik | DIVERGENT_PROMOTER     | 1.166                                                        | 2.778                          | 918.02             | 2550.20            | 3.240                          | 772.64                    | 2503.26            |  |
| A_68_P27921506 | chr11:74432896-74432940                           | NM_001013784:-188        | E130309D14Rik | PROMOTER               | 1.166                                                        | 1.844                          | 1715.91            | 3164.87            | 2.150                          | 1387.26                   | 2982.81            |  |
| A_68_P23278481 | chr4:125826881-125826925                          | NM_172145:1656           | Fam176b       | INSIDE                 | 1.166                                                        | 1.424                          | 2365.06            | 3367.83            | 1.660                          | 1762.93                   | 2926.81            |  |
| A_68_P24544189 | chr6:72848961-72849005                            | NM_019715:991            | Kemf1         | INSIDE                 | 1.166                                                        | 1.930                          | 716.29             | 1382.63            | 2.251                          | 665.98                    | 1498.86            |  |
| A_68_P22344954 | chr3:95463365-95463409                            | NM_008562:744            | Mcl1          | INSIDE                 | 1.166                                                        | 3.785                          | 665.65             | 2519.18            | 4.411                          | 643.65                    | 2839.10            |  |
| A_68_P31866306 | chr18:80905336-80905380                           | NM_001164111:-446        | Nfate1        | PROMOTER               | 1.166                                                        | 2.099                          | 1000.58            | 2100.11            | 2.448                          | 951.49                    | 2329.55            |  |
| A_68_P29620064 | chr14:56444394-56444438                           | NM_001168346:785         | Nfate4        | INSIDE                 | 1.166                                                        | 1.624                          | 956.60             | 1553.90            | 1.893                          | 843.96                    | 1597.94            |  |
| A_68_P31442543 | chr17:91487324-91487368                           | NM_020252:4796           | Nrxn1         | INSIDE                 | 1.166                                                        | 2.653                          | 902.84             | 2395.25            | 3.093                          | 789.77                    | 2442.60            |  |
| A_68_P27280128 | chr10:79440201-79440245                           | NM_001003949:6853        | ORF61         | INSIDE                 | 1.166                                                        | 2.892                          | 514.13             | 1486.75            | 3.371                          | 469.56                    | 1582.83            |  |
| A_68_P23523156 | chr5:20387967-20388011                            | NM_172992:-46            | Phf2          | DIVERGENT_PROMOTER     | 1.166                                                        | 2.800                          | 509.68             | 1427.33            | 3.265                          | 465.37                    | 1519.46            |  |
| A_68_P31375073 | chr17:79420257-79420301                           | NM_001171004:-122        | Prkd3         | PROMOTER               | 1.166                                                        | 1.924                          | 901.90             | 1735.33            | 2.243                          | 985.30                    | 2210.25            |  |
| A_68_P23308456 | chr4:131375306-131375350                          | NM_001083119:18865       | Ptpru         | INSIDE                 | 1.166                                                        | 2.395                          | 1070.24            | 2563.65            | 2.792                          | 849.34                    | 2371.43            |  |
| A_68_P23301754 | chr4:130219409-130219453                          | NM_001159603:157         | Pum1          | INSIDE                 | 1.166                                                        | 1.593                          | 2943.81            | 4688.97            | 1.857                          | 2433.48                   | 4518.09            |  |
| A_68_P27971356 | chr11:83232242-83232286                           | NM_001013386:8691        | Ras110b       | INSIDE                 | 1.166                                                        | 1.888                          | 560.46             | 1058.16            | 2.202                          | 505.04                    | 1112.08            |  |
| A_68_P23269838 | chr4:124386319-124386363                          | NM_029157:-5764          | Sf3a3         | PROMOTER               | 1.166                                                        | 2.270                          | 1051.12            | 2385.68            | 2.645                          | 923.29                    | 2442.51            |  |
| A_68_P28469868 | chr12:60114568-60114612                           | NM_025656:211            | Sip1          | INSIDE                 | 1.166                                                        | 3.562                          | 947.64             | 3375.86            | 4.154                          | 750.96                    | 3119.53            |  |
| A_68_P23437240 | chr4:154596449-154596493                          | NM_011385:174            | Ski           | INSIDE                 | 1.166                                                        | 3.145                          | 1421.01            | 4469.39            | 3.668                          | 1317.50                   | 4832.49            |  |
| A_68_P31190360 | chr17:43766712-43766757                           | NM_001161366:514         | Tdrd6         | INSIDE                 | 1.166                                                        | 3.015                          | 1388.38            | 4186.14            | 3.517                          | 1101.66                   | 3874.57            |  |
| A_68_P29733539 | chr14:76814024-76814068                           | NM_207652:-1581          | Tsc22d1       | PROMOTER               | 1.166                                                        | 1.597                          | 1582.73            | 2527.26            | 1.862                          | 1241.80                   | 2312.65            |  |
| A_68_P21365113 | chr2:78708721-78708765                            | NM_009454:-461           | Ube2c3        | PROMOTER               | 1.166                                                        | 1.490                          | 728.34             | 1085.41            | 1.737                          | 674.61                    | 1171.98            |  |

| ProbeName      | Target position of probe on CpG island microarray | TargetID                 | GeneSymbol    | CpG island Description | Ratio of relative methylation (TiO <sub>2</sub> -NP/Vehicle) | Sham group                     |                    |                    | TiO <sub>2</sub> -H group      |                    |                    |
|----------------|---------------------------------------------------|--------------------------|---------------|------------------------|--------------------------------------------------------------|--------------------------------|--------------------|--------------------|--------------------------------|--------------------|--------------------|
|                |                                                   |                          |               |                        |                                                              | Relative methylation (Cy5/Cy3) | Cy3 signal (Input) | Cy5 signal (MeDIP) | Relative methylation (Cy5/Cy3) | Cy3 signal (Input) | Cy5 signal (MeDIP) |
| A_68_P27804989 | chr11:53293020-53293064                           | NM_183173:655            | Ankrd43       | INSIDE                 | 1.165                                                        | 1.588                          | 776.88             | 1233.52            | 1.849                          | 718.72             | 1329.25            |
| A_68_P26813124 | chr9:108017763-108017807                          | NM_007567:74930          | Bsn           | INSIDE                 | 1.165                                                        | 2.238                          | 593.78             | 1328.85            | 2.606                          | 504.27             | 1314.23            |
| A_68_P29265995 | chr13:100670678-100670722                         | NM_001081493:-62         | Cartpt        | PROMOTER               | 1.165                                                        | 1.491                          | 1525.60            | 2274.37            | 1.736                          | 1340.60            | 2327.63            |
| A_68_P20148459 | chr1:36529023-36529067                            | NM_033570:603            | Cnmn4         | INSIDE                 | 1.165                                                        | 1.785                          | 745.44             | 1330.67            | 2.080                          | 617.23             | 1283.54            |
| A_68_P25394242 | chr7:112911135-112911179                          | NM_001162943:24908       | Dchs1         | INSIDE                 | 1.165                                                        | 2.578                          | 2574.72            | 6638.59            | 3.005                          | 1994.20            | 5992.69            |
| A_68_P26656976 | chr9:77758360-77758404                            | NM_134255:-6789          | Elov15        | PROMOTER               | 1.165                                                        | 2.843                          | 775.36             | 2204.73            | 3.313                          | 719.40             | 2383.17            |
| A_68_P26919702 | chr10:7310204-7310248                             | NM_172784:629            | Lrp11         | INSIDE                 | 1.165                                                        | 2.684                          | 499.30             | 1340.24            | 3.126                          | 444.91             | 1390.92            |
| A_68_P28744821 | chr12:112813339-112813383                         | NM_021516:640            | Mark3         | INSIDE                 | 1.165                                                        | 0.486                          | 1189.00            | 578.41             | 0.567                          | 1016.12            | 575.83             |
| A_68_P31827985 | chr18:73975089-73975133                           | NM_145494:-64            | Me2           | PROMOTER               | 1.165                                                        | 6.271                          | 892.85             | 5598.90            | 7.304                          | 890.11             | 6500.97            |
| A_68_P28071734 | chr11:100931359-100931403                         | NM_013792:-27            | Naglu         | PROMOTER               | 1.165                                                        | 2.415                          | 1017.05            | 2456.08            | 2.813                          | 926.57             | 2606.71            |
| A_68_P25953245 | chr8:73183706-73183750                            | NM_023217:-148           | Pgpep1        | PROMOTER               | 1.165                                                        | 1.716                          | 7569.75            | 12989.11           | 1.998                          | 5233.01            | 10458.06           |
| A_68_P25265268 | chr7:87343468-87343512                            | NM_013659:11764          | Sema4b        | INSIDE                 | 1.165                                                        | 4.737                          | 898.99             | 4258.33            | 5.516                          | 879.43             | 4851.20            |
| A_68_P22963535 | chr4:61947389-61947433                            | NM_025286:-68            | Slc31a2       | PROMOTER               | 1.165                                                        | 2.140                          | 906.91             | 1940.79            | 2.494                          | 893.96             | 2229.65            |
| A_68_P21556057 | chr2:116947191-116947235                          | NM_033524:27             | Spred1        | INSIDE                 | 1.165                                                        | 3.570                          | 303.39             | 1083.24            | 4.158                          | 285.58             | 1187.43            |
| A_68_P32775152 | chrX:155971013-155971057                          | NM_001033472:435         | A830080D01Rik | INSIDE                 | 1.164                                                        | 2.538                          | 1217.05            | 3088.99            | 2.953                          | 922.06             | 2722.95            |
| A_68_P27285629 | chr10:80269928-80269972                           | NM_007445:1958           | Amh           | INSIDE                 | 1.164                                                        | 1.844                          | 717.78             | 1323.69            | 2.146                          | 631.50             | 1355.50            |
| A_68_P25372490 | chr7:108450530-108450574                          | NM_001111111:50          | Atg16l2       | INSIDE                 | 1.164                                                        | 1.840                          | 694.52             | 1277.58            | 2.141                          | 577.71             | 1236.66            |
| A_68_P22871971 | chr4:43506143-43506188                            | NM_001037913:-71         | Ccdc107       | DIVERGENT_PROMOTER     | 1.164                                                        | 3.292                          | 448.35             | 1475.76            | 3.832                          | 370.94             | 1421.41            |
| A_68_P27303130 | chr10:83997039-83997083                           | NM_175451:-427           | Ckap4         | PROMOTER               | 1.164                                                        | 1.563                          | 983.03             | 1536.56            | 1.820                          | 841.91             | 1532.39            |
| A_68_P29335933 | chr13:113442449-113442493                         | NM_001145885:48          | Ddx4          | INSIDE                 | 1.164                                                        | 3.803                          | 895.02             | 3403.52            | 4.425                          | 799.64             | 3538.47            |
| A_68_P25776099 | chr8:35872603-35872647                            | NM_176933:1961           | Dusp4         | INSIDE                 | 1.164                                                        | 2.837                          | 620.70             | 1760.80            | 3.303                          | 563.63             | 1861.79            |
| A_68_P26983899 | chr10:19654713-19654757                           | NM_008580:403            | Map3k5        | INSIDE                 | 1.164                                                        | 2.398                          | 3140.19            | 7531.51            | 2.792                          | 2610.10            | 7287.64            |
| A_68_P25025267 | chr7:29871114-29871158                            | NR_035489:-2423          | Mir1963       | PROMOTER               | 1.164                                                        | 3.748                          | 884.50             | 3315.12            | 4.364                          | 694.22             | 3029.26            |
| A_68_P28790400 | chr13:3892775-3892819                             | NM_001047159:28          | Net1          | INSIDE                 | 1.164                                                        | 1.641                          | 540.23             | 886.63             | 1.911                          | 477.41             | 912.36             |
| A_68_P25846475 | chr8:49362088-49362132                            | NM_001145937:397934      | Odz3          | INSIDE                 | 1.164                                                        | 2.003                          | 587.65             | 1176.83            | 2.332                          | 528.97             | 1233.48            |
| A_68_P26018119 | chr8:86618743-86618787                            | NM_009055:28030          | Rfx1          | INSIDE                 | 1.164                                                        | 2.584                          | 763.92             | 1973.77            | 3.008                          | 717.04             | 2156.87            |
| A_68_P30425657 | chr15:89354548-89354592                           | NM_021423:24283          | Shank3        | INSIDE                 | 1.164                                                        | 2.008                          | 560.78             | 1126.20            | 2.337                          | 621.33             | 1451.99            |
| A_68_P28332009 | chr12:32243915-32243959                           | NM_011867:898            | Slc26a4       | INSIDE                 | 1.164                                                        | 2.034                          | 667.24             | 1356.89            | 2.366                          | 587.76             | 1390.74            |
| A_68_P28047897 | chr11:96838592-96838636                           | NM_001080964:388         | Sp2           | INSIDE                 | 1.164                                                        | 4.326                          | 886.05             | 3833.34            | 5.036                          | 857.14             | 4316.19            |
| A_68_P20886547 | chr1:184339477-184339521                          | NM_173378:201            | Trp53bp2      | INSIDE                 | 1.164                                                        | 1.427                          | 1103.43            | 1574.76            | 1.662                          | 1022.68            | 1699.44            |
| A_68_P24874649 | chr6:136776165-136776209                          | NM_021714:551            | Wbp11         | INSIDE                 | 1.164                                                        | 1.634                          | 1191.71            | 1947.50            | 1.902                          | 999.15             | 1900.43            |
| A_68_P20412363 | chr1:88383877-88383921                            |                          | Unknown       |                        | 1.164                                                        | 2.015                          | 1185.95            | 2389.44            | 2.345                          | 1015.60            | 2381.90            |
| A_68_P32101745 | chr19:38555886-38555930                           | ENSMUST00000158315:-8216 |               | PROMOTER               | 1.164                                                        | 1.605                          | 1073.85            | 1723.43            | 1.869                          | 895.69             | 1673.74            |
| A_68_P24045560 | chr5:122068966-122069010                          | NM_178799:-41            | Acad12        | PROMOTER               | 1.163                                                        | 1.860                          | 372.25             | 692.22             | 2.163                          | 353.93             | 765.45             |
| A_68_P21021376 | chr2:14525863-14525907                            | NM_023116:-48            | Caenb2        | PROMOTER               | 1.163                                                        | 1.602                          | 1155.81            | 1851.38            | 1.863                          | 1025.78            | 1911.28            |
| A_68_P32315763 | chrX:33428723-33428767                            | NM_001009947:-82         | Dock11        | PROMOTER               | 1.163                                                        | 2.910                          | 459.91             | 1338.39            | 3.385                          | 251.06             | 849.78             |
| A_68_P26896523 | chr9:123626629-123626673                          | NM_033322:25             | Lztf1l        | INSIDE                 | 1.163                                                        | 1.494                          | 1426.66            | 2131.75            | 1.738                          | 1060.48            | 1843.48            |
| A_68_P24132966 | chr5:139470282-139470326                          | NM_008808:603            | Pdgfra        | INSIDE                 | 1.163                                                        | 1.573                          | 5580.03            | 8775.96            | 1.829                          | 4162.00            | 7610.81            |
| A_68_P28159703 | chr11:116360161-116360205                         | NM_026364:-8522          | Prpsap1       | PROMOTER               | 1.163                                                        | 1.550                          | 1351.56            | 2094.93            | 1.802                          | 1066.40            | 1922.01            |
| A_68_P27045328 | chr10:31328333-31328377                           | NM_001146349:1177        | Rnf217        | INSIDE                 | 1.163                                                        | 2.238                          | 510.93             | 1143.60            | 2.604                          | 475.56             | 1238.40            |
| A_68_P25408486 | chr7:116662855-116662899                          | NR_028079:-769           | Snora3        | PROMOTER               | 1.163                                                        | 1.854                          | 1941.16            | 3599.16            | 2.156                          | 1582.30            | 3412.06            |
| A_68_P21265074 | chr2:61431520-61431564                            | NM_001164071:389         | Tank          | INSIDE                 | 1.163                                                        | 1.521                          | 851.53             | 1295.35            | 1.768                          | 729.75             | 1290.55            |
| A_68_P25056438 | chr7:37480533-37480577                            | NM_172298:-2582          | Tshz3         | PROMOTER               | 1.163                                                        | 1.583                          | 4047.07            | 6407.55            | 1.841                          | 3162.14            | 5820.64            |
| A_68_P29072113 | chr13:58317002-58317046                           | NM_026842:-10            | Ubp1n1        | PROMOTER               | 1.163                                                        | 2.057                          | 600.52             | 1235.01            | 2.391                          | 547.77             | 1309.98            |
| A_68_P28152749 | chr11:115179633-115179677                         | NM_176847:3578           | Ush1g         | INSIDE                 | 1.163                                                        | 1.541                          | 3067.01            | 4726.19            | 1.792                          | 2464.29            | 4416.65            |
| A_68_P21583235 | chr2:121692691-121692735                          | NM_001205371:-728        | Casc4         | PROMOTER               | 1.162                                                        | 2.770                          | 373.35             | 1034.29            | 3.219                          | 360.94             | 1162.01            |
| A_68_P25672257 | chr8:14096396-14096440                            | NM_001145965:544         | Dlgap2        | INSIDE                 | 1.162                                                        | 3.953                          | 809.97             | 3202.12            | 4.595                          | 729.25             | 3350.76            |
| A_68_P28958812 | chr13:38243505-38243549                           | NM_023842:364            | Dsp           | INSIDE                 | 1.162                                                        | 2.133                          | 585.73             | 1249.13            | 2.478                          | 505.13             | 1251.96            |
| A_68_P20192817 | chr1:44204965-44205009                            | NM_011729:398            | Ercc5         | INSIDE                 | 1.162                                                        | 2.004                          | 1968.31            | 3943.75            | 2.328                          | 1667.14            | 3880.40            |
| A_68_P21582987 | chr2:121632660-121632704                          | NM_172673:111            | Frmf5         | INSIDE                 | 1.162                                                        | 1.775                          | 4081.34            | 7245.41            | 2.063                          | 3367.87            | 6947.58            |
| A_68_P28107590 | chr11:107409081-107409125                         | NM_198298:-171           | Helz          | PROMOTER               | 1.162                                                        | 1.765                          | 2408.20            | 4251.53            | 2.051                          | 2018.51            | 4139.88            |

| ProbeName      | Target position of probe on CpG island microarray | TargetID                 | GeneSymbol    | CpG island Description | Ratio of relative methylation (TiO <sub>2</sub> -NP/Vehicle) | Sham group                     |                    |                    | TiO <sub>2</sub> -H group      |                    |                    |
|----------------|---------------------------------------------------|--------------------------|---------------|------------------------|--------------------------------------------------------------|--------------------------------|--------------------|--------------------|--------------------------------|--------------------|--------------------|
|                |                                                   |                          |               |                        |                                                              | Relative methylation (Cy5/Cy3) | Cy3 signal (Input) | Cy5 signal (MeDIP) | Relative methylation (Cy5/Cy3) | Cy3 signal (Input) | Cy5 signal (MeDIP) |
| A_68_P20633482 | chr1:136352339-136352383                          | NM_153128:229            | Kih112        | INSIDE                 | 1.162                                                        | 1.746                          | 576.39             | 1006.33            | 2.029                          | 540.89             | 1097.33            |
| A_68_P27284766 | chr10:80139373-80139417                           | NM_021462:-4673          | Mknk2         | PROMOTER               | 1.162                                                        | 0.489                          | 1718.43            | 839.46             | 0.568                          | 1357.70            | 770.68             |
| A_68_P31478454 | chr18:7626883-7626927                             | NM_001081287:-43         | Mpp7          | PROMOTER               | 1.162                                                        | 1.478                          | 1676.34            | 2477.40            | 1.717                          | 1396.87            | 2398.57            |
| A_68_P30083235 | chr15:25711092-25711136                           | NM_019472:158810         | Myo10         | INSIDE                 | 1.162                                                        | 2.489                          | 663.44             | 1651.06            | 2.892                          | 565.16             | 1634.44            |
| A_68_P24084799 | chr5:129242041-129242085                          | NM_021311:-58            | Piwil1        | PROMOTER               | 1.162                                                        | 2.744                          | 1410.40            | 3870.44            | 3.188                          | 1125.43            | 3587.53            |
| A_68_P30513996 | chr16:5132766-5132810                             | NM_008909:-214           | Ppl           | PROMOTER               | 1.162                                                        | 1.562                          | 909.88             | 1421.00            | 1.815                          | 807.16             | 1464.79            |
| A_68_P23538313 | chr5:23289297-23289341                            | NM_178403:161            | Pus7          | INSIDE                 | 1.162                                                        | 1.354                          | 1984.53            | 2687.86            | 1.574                          | 1618.98            | 2548.35            |
| A_68_P23993051 | chr5:113005885-113005929                          | NM_019982:299            | Sez6l         | INSIDE                 | 1.162                                                        | 1.662                          | 832.98             | 1384.55            | 1.932                          | 762.18             | 1472.36            |
| A_68_P23576449 | chr5:31395933-31395977                            | NM_011773:-54            | Slc30a3       | PROMOTER               | 1.162                                                        | 1.333                          | 4714.24            | 6282.60            | 1.549                          | 3547.57            | 5495.42            |
| A_68_P27287686 | chr10:80607070-80607114                           | NM_010731:8077           | Zbtb7a        | INSIDE                 | 1.162                                                        | 2.345                          | 1634.05            | 3831.22            | 2.726                          | 1251.88            | 3412.07            |
| A_68_P25261702 | chr7:86680581-86680625                            | ENSMUST00000141822:35600 |               | DOWNSTREAM             | 1.162                                                        | 2.394                          | 1222.47            | 2926.70            | 2.783                          | 1069.30            | 2975.58            |
| A_68_P32538580 | chrX:91612075-91612119                            | NM_026673:-352           | Apoa          | PROMOTER               | 1.161                                                        | 1.776                          | 931.76             | 1654.73            | 2.063                          | 493.39             | 1017.63            |
| A_68_P23350169 | chr4:138748940-138748984                          | NM_001037761:69          | Capzb         | INSIDE                 | 1.161                                                        | 0.498                          | 2606.24            | 1296.94            | 0.578                          | 2247.46            | 1298.31            |
| A_68_P26127991 | chr8:106864790-106864834                          | NM_024217:319            | Cmtm3         | INSIDE                 | 1.161                                                        | 2.268                          | 1053.71            | 2389.46            | 2.633                          | 885.32             | 2331.31            |
| A_68_P29578364 | chr14:47407974-47408018                           | NM_009919:36             | Cnih          | INSIDE                 | 1.161                                                        | 0.594                          | 2979.49            | 1769.89            | 0.690                          | 2436.84            | 1681.31            |
| A_68_P24158342 | chr5:144578471-144578515                          | NM_013557:-168           | Eif2ak1       | PROMOTER               | 1.161                                                        | 1.445                          | 4526.62            | 6541.93            | 1.678                          | 354.32             | 5963.62            |
| A_68_P26612669 | chr9:69607113-69607157                            | NM_022378:1613           | Foxb1         | INSIDE                 | 1.161                                                        | 1.745                          | 5516.67            | 9628.09            | 2.026                          | 4452.61            | 9019.66            |
| A_68_P26224602 | chr8:123640403-123640447                          | NM_013519:354            | Foxc2         | INSIDE                 | 1.161                                                        | 1.785                          | 647.47             | 1155.93            | 2.073                          | 590.03             | 1223.19            |
| A_68_P32823843 | chrX:166435357-166435401                          | NM_183151:117825         | Mid1          | DOWNSTREAM             | 1.161                                                        | 1.952                          | 20431.29           | 39877.87           | 2.267                          | 17302.79           | 39218.31           |
| A_68_P21742433 | chr2:150864640-150864699                          | NM_026086:446            | Nanp          | INSIDE                 | 1.161                                                        | 1.808                          | 605.21             | 1094.50            | 2.100                          | 547.92             | 1150.48            |
| A_68_P32266421 | chrX:13063192-13063236                            | NM_173415:18417          | Nyx           | INSIDE                 | 1.161                                                        | 1.926                          | 755.79             | 1455.54            | 2.236                          | 365.90             | 818.02             |
| A_68_P21775756 | chr2:157029918-157029962                          | NM_011249:330            | Rbl1          | INSIDE                 | 1.161                                                        | 1.688                          | 1073.55            | 1812.10            | 1.960                          | 892.77             | 1750.20            |
| A_68_P23405236 | chr4:149655404-149655448                          | NM_001085492:-598        | Rere          | PROMOTER               | 1.161                                                        | 3.151                          | 649.22             | 2045.76            | 3.659                          | 603.89             | 2209.74            |
| A_68_P25050061 | chr7:36370407-36370451                            | NM_145840:173            | Rgs9bp        | INSIDE                 | 1.161                                                        | 1.472                          | 671.23             | 988.26             | 1.710                          | 564.62             | 965.42             |
| A_68_P30465077 | chr15:96529839-96529883                           | NM_175121:269            | Slc38a2       | INSIDE                 | 1.161                                                        | 1.661                          | 1754.43            | 2914.12            | 1.929                          | 1551.69            | 2992.48            |
| A_68_P20005795 | chr1:4482172-4482216                              | NM_011441:4300           | Sox17         | INSIDE                 | 1.161                                                        | 1.784                          | 876.78             | 1564.43            | 2.072                          | 771.57             | 1598.41            |
| A_68_P31752325 | chr18:60755946-60755990                           | NM_177340:27991          | Synpo         | INSIDE                 | 1.161                                                        | 1.988                          | 453.13             | 900.73             | 2.308                          | 358.69             | 827.98             |
| A_68_P23416140 | chr4:151406689-151406733                          | NM_031867:5889           | Tas1r1        | INSIDE                 | 1.161                                                        | 2.454                          | 1721.04            | 4222.81            | 2.848                          | 1236.85            | 3523.10            |
| A_68_P29048726 | chr13:54398661-54398705                           | AK086128:102013          |               | DOWNSTREAM             | 1.161                                                        | 2.343                          | 1399.89            | 3279.85            | 2.719                          | 1321.84            | 3594.11            |
| A_68_P23425242 | chr4:152856847-152856891                          | NM_001099299:71          | Ajap1         | INSIDE                 | 1.160                                                        | 1.544                          | 554.00             | 855.46             | 1.791                          | 480.57             | 860.66             |
| A_68_P23210414 | chr4:111087603-111087647                          | NM_026279:14             | Bend5         | INSIDE                 | 1.160                                                        | 2.318                          | 2336.90            | 5416.06            | 2.688                          | 1735.98            | 4665.75            |
| A_68_P24093838 | chr5:130925235-130925279                          | NM_021371:595            | Caln1         | INSIDE                 | 1.160                                                        | 1.977                          | 954.06             | 1886.18            | 2.294                          | 859.31             | 1971.33            |
| A_68_P30459324 | chr15:95485068-95485112                           | NM_207533:112            | Dbx2          | INSIDE                 | 1.160                                                        | 1.935                          | 1460.66            | 2826.98            | 2.245                          | 1208.85            | 2714.17            |
| A_68_P32651795 | chrX:126284318-126284362                          | NM_172493:63             | Diap2         | INSIDE                 | 1.160                                                        | 1.606                          | 1484.43            | 2384.13            | 1.864                          | 720.63             | 1343.02            |
| A_68_P29250235 | chr13:98010886-98010930                           | NM_007930:-151           | Enc1          | PROMOTER               | 1.160                                                        | 2.613                          | 1346.21            | 3517.81            | 3.032                          | 1206.68            | 3659.00            |
| A_68_P20441864 | chr1:93242302-93242346                            | NM_001033292:23673       | Espnl         | INSIDE                 | 1.160                                                        | 1.865                          | 373.50             | 696.57             | 2.163                          | 298.95             | 646.52             |
| A_68_P26617706 | chr9:70505115-70505159                            | NM_172772:-155           | Fam63b        | PROMOTER               | 1.160                                                        | 4.001                          | 1407.09            | 5629.81            | 4.640                          | 1348.15            | 6256.02            |
| A_68_P31936818 | chr19:7015888-7015932                             | NM_001177360:-227        | Gpr137        | PROMOTER               | 1.160                                                        | 0.476                          | 1920.49            | 914.03             | 0.552                          | 1627.59            | 898.76             |
| A_68_P21680297 | chr2:139504517-139504561                          | NM_001126490:625         | Ism1          | INSIDE                 | 1.160                                                        | 2.306                          | 530.37             | 1223.07            | 2.675                          | 493.09             | 1318.92            |
| A_68_P21074761 | chr2:25733684-25733728                            | NM_175462:326            | Kent1         | INSIDE                 | 1.160                                                        | 1.958                          | 764.40             | 1496.40            | 2.270                          | 584.33             | 1326.47            |
| A_68_P27767869 | chr11:46250544-46250588                           | NM_001104556:104         | Med7          | INSIDE                 | 1.160                                                        | 1.894                          | 1120.01            | 2121.24            | 2.198                          | 862.62             | 1895.61            |
| A_68_P27922353 | chr11:74584217-74584261                           | NM_026197:-126           | Mettl16       | PROMOTER               | 1.160                                                        | 1.855                          | 2512.12            | 4659.88            | 2.153                          | 1995.23            | 4294.96            |
| A_68_P32774619 | chrX:155852596-155852640                          | NM_001081124:109         | Mtap7d2       | INSIDE                 | 1.160                                                        | 2.861                          | 1001.79            | 2866.21            | 3.319                          | 714.12             | 2369.83            |
| A_68_P24992918 | chr7:19955528-19955572                            | NM_001010836:8986        | Ppp1r13l      | INSIDE                 | 1.160                                                        | 1.914                          | 985.22             | 1885.39            | 2.220                          | 877.85             | 1948.64            |
| A_68_P28058848 | chr11:98698706-98698750                           | NM_001080925:630         | Rapgef1l      | INSIDE                 | 1.160                                                        | 1.437                          | 1326.86            | 1906.16            | 1.666                          | 1019.99            | 1699.69            |
| A_68_P28037688 | chr11:95120636-95120680                           | NM_053093:-2184          | Tac4          | PROMOTER               | 1.160                                                        | 1.579                          | 845.68             | 1335.31            | 1.831                          | 730.18             | 1337.12            |
| A_68_P29095533 | chr13:63916826-63916870                           | NM_023507:207            | 0610007P08Rik | INSIDE                 | 1.159                                                        | 2.493                          | 997.04             | 2485.63            | 2.888                          | 929.73             | 2685.42            |
| A_68_P30404613 | chr15:85862950-85862994                           | NM_009886:1235           | Celsr1        | INSIDE                 | 1.159                                                        | 3.177                          | 1485.04            | 4717.54            | 3.680                          | 1245.53            | 4584.13            |
| A_68_P22649277 | chr3:151872936-151872980                          | NM_027287:305            | Dnajb4        | INSIDE                 | 1.159                                                        | 2.736                          | 1124.88            | 3077.72            | 3.171                          | 1025.47            | 3252.22            |
| A_68_P26137129 | chr8:108503182-108503226                          | NM_027960:115            | Dpep3         | INSIDE                 | 1.159                                                        | 6.067                          | 6485.20            | 39344.93           | 7.029                          | 4215.29            | 29628.86           |
| A_68_P25592947 | chr7:149281374-149281418                          | NM_008748:-207           | Dusp8         | PROMOTER               | 1.159                                                        | 1.443                          | 3302.17            | 4763.96            | 1.672                          | 2564.44            | 4286.69            |

| ProbeName      | Target position of probe on CpG island microarray | TargetID                 | GeneSymbol    | CpG island Description | Ratio of relative methylation (TiO <sub>2</sub> -NP/Vehicle) | Sham group                                             |                               |                               | TiO <sub>2</sub> -H group                              |                               |                               |
|----------------|---------------------------------------------------|--------------------------|---------------|------------------------|--------------------------------------------------------------|--------------------------------------------------------|-------------------------------|-------------------------------|--------------------------------------------------------|-------------------------------|-------------------------------|
|                |                                                   |                          |               |                        |                                                              | Relative methylation (C <sub>5</sub> /C <sub>3</sub> ) | C <sub>3</sub> signal (Input) | C <sub>5</sub> signal (MeDIP) | Relative methylation (C <sub>5</sub> /C <sub>3</sub> ) | C <sub>3</sub> signal (Input) | C <sub>5</sub> signal (MeDIP) |
| A_68_P24131504 | chr5:139231132-139231176                          | NM_030565:120            | Fam20c        | INSIDE                 | 1.159                                                        | 1.484                                                  | 1863.85                       | 2765.61                       | 1.719                                                  | 1547.42                       | 2660.61                       |
| A_68_P28940417 | chr13:34839281-34839325                           | NM_138746:7792           | Fam50b        | INSIDE                 | 1.159                                                        | 2.694                                                  | 1092.47                       | 2942.64                       | 3.122                                                  | 872.89                        | 2725.40                       |
| A_68_P28558330 | chr12:78339604-78339648                           | NM_016893:-381           | Fut8          | PROMOTER               | 1.159                                                        | 1.710                                                  | 622.26                        | 1064.14                       | 1.982                                                  | 558.95                        | 1107.99                       |
| A_68_P23417713 | chr4:151657232-151657276                          | NM_178406:8784           | Gpr153        | INSIDE                 | 1.159                                                        | 1.729                                                  | 995.04                        | 1720.92                       | 2.005                                                  | 855.70                        | 1715.49                       |
| A_68_P26991381 | chr10:20879458-20879502                           | NM_001198914:1310        | Myb           | INSIDE                 | 1.159                                                        | 2.304                                                  | 1496.69                       | 3448.80                       | 2.672                                                  | 2098.36                       | 5605.77                       |
| A_68_P25088768 | chr7:51924794-51924838                            | NM_028021:-3943          | Myh14         | PROMOTER               | 1.159                                                        | 3.492                                                  | 1828.66                       | 6386.37                       | 4.048                                                  | 1540.49                       | 6236.61                       |
| A_68_P32147200 | chr19:47089737-47089781                           | NM_001164363:-79         | Nt5c2         | PROMOTER               | 1.159                                                        | 4.456                                                  | 652.74                        | 2908.64                       | 5.164                                                  | 608.74                        | 3143.35                       |
| A_68_P24464318 | chr6:54545243-54545287                            | NM_001001335:-7876       | Plekha8       | PROMOTER               | 1.159                                                        | 3.022                                                  | 388.51                        | 1174.15                       | 3.503                                                  | 345.22                        | 1209.42                       |
| A_68_P27646888 | chr11:23565964-23566008                           | NM_028304:11             | Pus10         | INSIDE                 | 1.159                                                        | 1.528                                                  | 906.17                        | 1384.92                       | 1.771                                                  | 795.22                        | 1408.44                       |
| A_68_P23538314 | chr5:23289429-23289473                            | NM_178403:29             | Pus7          | INSIDE                 | 1.159                                                        | 0.492                                                  | 2412.81                       | 1186.80                       | 0.570                                                  | 1999.98                       | 1139.89                       |
| A_68_P31096075 | chr17:24345873-24345917                           | NM_001163847:-3387       | Tbc1d24       | PROMOTER               | 1.159                                                        | 2.273                                                  | 1696.78                       | 3856.21                       | 2.633                                                  | 1542.43                       | 4061.20                       |
| A_68_P23416613 | chr4:151490095-151490139                          | NM_033042:-335           | Tnfrsf25      | PROMOTER               | 1.159                                                        | 2.088                                                  | 1440.34                       | 3006.97                       | 2.420                                                  | 1165.13                       | 2819.27                       |
| A_68_P24153998 | chr5:143668502-143668546                          | NM_007393:-121           | Actb          | PROMOTER               | 1.158                                                        | 1.736                                                  | 1188.70                       | 2063.87                       | 2.011                                                  | 986.52                        | 1983.81                       |
| A_68_P27899598 | chr11:70044019-70044063                           | NM_007528:-740           | Bcl6b         | DIVERGENT_PROMOTER     | 1.158                                                        | 2.917                                                  | 691.45                        | 2016.72                       | 3.378                                                  | 604.63                        | 2042.55                       |
| A_68_P30567430 | chr16:15887377-15887421                           | NM_007679:20             | Cebpd         | INSIDE                 | 1.158                                                        | 1.751                                                  | 3930.87                       | 6882.25                       | 2.028                                                  | 3060.61                       | 6207.85                       |
| A_68_P30981937 | chr16:94748428-94748472                           | NM_007834:-214           | Dscr3         | PROMOTER               | 1.158                                                        | 1.942                                                  | 755.82                        | 1467.54                       | 2.248                                                  | 708.23                        | 1591.80                       |
| A_68_P25565283 | chr7:144514346-144514390                          | NM_001113414:-8240       | Ebf3          | PROMOTER               | 1.158                                                        | 1.540                                                  | 850.97                        | 1310.83                       | 1.784                                                  | 787.12                        | 1404.50                       |
| A_68_P30345479 | chr15:75839800-75839844                           | NM_001168253:106         | Fam83h        | INSIDE                 | 1.158                                                        | 4.882                                                  | 1616.96                       | 7894.66                       | 5.655                                                  | 1461.34                       | 8264.06                       |
| A_68_P31099059 | chr17:24832929-24832973                           | NM_023040:151            | Gfer          | INSIDE                 | 1.158                                                        | 2.092                                                  | 392.30                        | 820.80                        | 2.423                                                  | 319.25                        | 773.47                        |
| A_68_P29138631 | chr13:73398065-73398109                           | NM_018885:142            | Irx4          | INSIDE                 | 1.158                                                        | 2.495                                                  | 449.44                        | 1121.21                       | 2.889                                                  | 488.88                        | 1412.60                       |
| A_68_P31936764 | chr19:7008234-7008278                             | NM_008431:749            | Kenk4         | INSIDE                 | 1.158                                                        | 2.114                                                  | 2046.22                       | 4325.38                       | 2.449                                                  | 1656.81                       | 4057.10                       |
| A_68_P27897675 | chr11:69694588-69694632                           | NM_153143:-123           | Kctd11        | PROMOTER               | 1.158                                                        | 1.503                                                  | 1277.15                       | 1919.13                       | 1.740                                                  | 1213.74                       | 2112.29                       |
| A_68_P32281788 | chrX:17740669-17740713                            | NM_009483:898            | Kdm6a         | INSIDE                 | 1.158                                                        | 0.413                                                  | 1681.79                       | 694.05                        | 0.478                                                  | 773.20                        | 369.41                        |
| A_68_P26017626 | chr8:86535448-86535492                            | NR_035431:62             | Mir1199       | INSIDE                 | 1.158                                                        | 3.710                                                  | 1220.15                       | 4526.23                       | 4.295                                                  | 1066.78                       | 4581.71                       |
| A_68_P26610634 | chr9:69245687-69245731                            | NM_145618:-96            | Narg2         | PROMOTER               | 1.158                                                        | 3.492                                                  | 373.65                        | 1304.78                       | 4.044                                                  | 363.11                        | 1468.53                       |
| A_68_P31938622 | chr19:7280556-7280600                             | NM_134150:196            | Otub1         | INSIDE                 | 1.158                                                        | 1.461                                                  | 1112.23                       | 1625.01                       | 1.692                                                  | 1141.24                       | 1931.34                       |
| A_68_P22774300 | chr4:21606032-21606076                            | NM_001080771:7056        | Prdm13        | INSIDE                 | 1.158                                                        | 3.298                                                  | 558.32                        | 1841.30                       | 3.818                                                  | 482.94                        | 1844.03                       |
| A_68_P21086001 | chr2:27532393-27532437                            | NM_011305:-306           | Rxra          | PROMOTER               | 1.158                                                        | 0.528                                                  | 1452.89                       | 766.40                        | 0.611                                                  | 1215.90                       | 742.78                        |
| A_68_P32126392 | chr19:43502033-43502077                           |                          |               | Unknown                | 1.158                                                        | 3.022                                                  | 746.70                        | 2256.29                       | 3.500                                                  | 628.86                        | 2200.90                       |
| A_68_P32473671 | chrX:73211910-73211954                            | ENSMUST00000121090:-7625 |               | PROMOTER               | 1.158                                                        | 2.230                                                  | 1777.83                       | 3965.40                       | 2.582                                                  | 726.23                        | 1875.48                       |
| A_68_P23195470 | chr4:108000920-108000964                          | NM_027250:186            | 2010305A19Rik | INSIDE                 | 1.157                                                        | 1.465                                                  | 5344.99                       | 7832.16                       | 1.696                                                  | 3928.29                       | 6662.37                       |
| A_68_P30475044 | chr15:98364664-98364708                           | NM_133714:-34            | 2310037I24Rik | PROMOTER               | 1.157                                                        | 1.404                                                  | 1906.96                       | 2678.06                       | 1.625                                                  | 1780.35                       | 2893.71                       |
| A_68_P31103782 | chr17:25570573-25570617                           | NM_001163691:134         | Caena1h       | INSIDE                 | 1.157                                                        | 2.787                                                  | 623.68                        | 1737.90                       | 3.225                                                  | 543.74                        | 1753.39                       |
| A_68_P21021384 | chr2:14526701-14526745                            | NM_023116:790            | Caenb2        | INSIDE                 | 1.157                                                        | 1.420                                                  | 2744.64                       | 3898.10                       | 1.644                                                  | 2168.95                       | 3564.77                       |
| A_68_P30978138 | chr16:93883923-93883967                           | NM_028083:-201           | Chaf1b        | PROMOTER               | 1.157                                                        | 2.705                                                  | 2183.38                       | 5906.71                       | 3.131                                                  | 1634.23                       | 5116.40                       |
| A_68_P22729161 | chr4:11249125-11249169                            | NM_001081201:132         | Dpy1914       | INSIDE                 | 1.157                                                        | 1.628                                                  | 735.55                        | 1197.84                       | 1.884                                                  | 634.65                        | 1195.85                       |
| A_68_P31252967 | chr17:56095790-56095834                           | NM_015766:3767           | Ebi3          | INSIDE                 | 1.157                                                        | 2.913                                                  | 618.38                        | 1801.32                       | 3.369                                                  | 543.91                        | 1832.44                       |
| A_68_P25328176 | chr7:100228697-100228741                          | NM_021427:330            | Fam181b       | INSIDE                 | 1.157                                                        | 2.624                                                  | 2630.72                       | 6902.01                       | 3.035                                                  | 2185.13                       | 6631.03                       |
| A_68_P23546246 | chr5:24728813-24728857                            | NM_144908:124            | Galnt11       | INSIDE                 | 1.157                                                        | 2.125                                                  | 443.46                        | 942.42                        | 2.459                                                  | 446.08                        | 1096.73                       |
| A_68_P28091896 | chr11:104469667-104469711                         | NM_016780:375            | Irgb3         | INSIDE                 | 1.157                                                        | 2.102                                                  | 2504.57                       | 5263.47                       | 2.432                                                  | 2020.52                       | 4913.52                       |
| A_68_P22686351 | chr3:158224713-158224757                          | NM_001081358:451         | Lrrc7         | INSIDE                 | 1.157                                                        | 0.399                                                  | 1406.49                       | 561.65                        | 0.462                                                  | 1064.24                       | 491.81                        |
| A_68_P25169129 | chr7:69564808-69564852                            | NM_011746:195            | Mkrm3         | INSIDE                 | 1.157                                                        | 2.341                                                  | 1013.95                       | 2373.88                       | 2.710                                                  | 832.69                        | 2256.34                       |
| A_68_P32266423 | chrX:13063488-13063532                            | NM_173415:18713          | Nyx           | INSIDE                 | 1.157                                                        | 4.248                                                  | 599.53                        | 2546.75                       | 4.914                                                  | 483.60                        | 2376.30                       |
| A_68_P24832848 | chr6:127403924-127403968                          | NM_181402:206            | Parp11        | INSIDE                 | 1.157                                                        | 1.601                                                  | 1326.84                       | 2124.07                       | 1.851                                                  | 1212.37                       | 2244.69                       |
| A_68_P22101766 | chr3:45184223-45184267                            | NM_011043:1925           | Pedh10        | INSIDE                 | 1.157                                                        | 1.610                                                  | 981.14                        | 1579.28                       | 1.862                                                  | 738.83                        | 1375.94                       |
| A_68_P24479719 | chr6:57641697-57641742                            | NM_025574:353            | Pigy          | INSIDE                 | 1.157                                                        | 2.388                                                  | 1735.35                       | 4144.24                       | 2.763                                                  | 1623.52                       | 4485.24                       |
| A_68_P30377510 | chr15:81191319-81191363                           | NM_011399:-145           | Ste25a17      | PROMOTER               | 1.157                                                        | 0.517                                                  | 1028.75                       | 532.34                        | 0.599                                                  | 806.35                        | 482.61                        |
| A_68_P25016939 | chr7:28149566-28149610                            | NM_001199235:29937       | Spnb4         | INSIDE                 | 1.157                                                        | 2.209                                                  | 701.16                        | 1548.84                       | 2.556                                                  | 605.31                        | 1546.98                       |
| A_68_P31175211 | A_68_P31175211                                    |                          |               | Unknown                | 1.157                                                        | 6.601                                                  | 10784.75                      | 71187.93                      | 7.637                                                  | 7274.03                       | 55553.92                      |
| A_68_P31498901 | chr18:12279785-12279829                           | NM_178801:156            | 6030446N20Rik | INSIDE                 | 1.156                                                        | 2.003                                                  | 2839.72                       | 5686.95                       | 2.315                                                  | 2295.22                       | 5313.65                       |
| A_68_P22682766 | chr3:157610204-157610248                          | NM_001013806:-203        | Ankrd13c      | PROMOTER               | 1.156                                                        | 2.091                                                  | 542.69                        | 1134.73                       | 2.416                                                  | 546.11                        | 1319.62                       |

| ProbeName      | Target position of probe on CpG island microarray | TargetID                | GeneSymbol    | CpG island Description | Ratio of relative methylation (TiO <sub>2</sub> -NP/Vehicle) | Sham group                     |                    |                    | TiO <sub>2</sub> -H group      |                    |                    |
|----------------|---------------------------------------------------|-------------------------|---------------|------------------------|--------------------------------------------------------------|--------------------------------|--------------------|--------------------|--------------------------------|--------------------|--------------------|
|                |                                                   |                         |               |                        |                                                              | Relative methylation (Cy5/Cy3) | Cy3 signal (Input) | Cy5 signal (MeDIP) | Relative methylation (Cy5/Cy3) | Cy3 signal (Input) | Cy5 signal (MeDIP) |
| A_68_P30533733 | chr16:8672342-8672386                             | NM_025821:-118          | Carhsp1       | PROMOTER               | 1.156                                                        | 2.730                          | 1314.80            | 3588.98            | 3.155                          | 1185.90            | 3741.36            |
| A_68_P29976942 | chr15:3929549-3929593                             | NM_134099:3             | Fbxo4         | INSIDE                 | 1.156                                                        | 3.256                          | 1137.38            | 3703.72            | 3.764                          | 950.74             | 3578.57            |
| A_68_P32104291 | chr19:39005160-39005205                           | NM_008234:-297          | Hells         | PROMOTER               | 1.156                                                        | 1.515                          | 759.51             | 1150.45            | 1.751                          | 671.56             | 1175.95            |
| A_68_P21339338 | chr2:74590901-74590945                            | NM_010468:40873         | Hoxd3         | DOWNSTREAM             | 1.156                                                        | 2.826                          | 221.94             | 627.30             | 3.268                          | 213.91             | 699.14             |
| A_68_P27971658 | chr11:83276246-83276290                           | NM_080453:195           | Mmp28         | INSIDE                 | 1.156                                                        | 2.247                          | 567.02             | 1274.19            | 2.597                          | 502.23             | 1304.47            |
| A_68_P20237359 | chr1:54614549-54614593                            | NM_001163314:-44        | Pgap1         | PROMOTER               | 1.156                                                        | 1.681                          | 1484.85            | 2495.30            | 1.942                          | 1145.74            | 2225.53            |
| A_68_P23794549 | chr5:73305228-73305272                            | NM_001113423:-305       | Slain2        | PROMOTER               | 1.156                                                        | 1.579                          | 1282.97            | 2025.55            | 1.825                          | 1051.06            | 1918.03            |
| A_68_P23278183 | chr4:125781499-125781543                          | NM_001145827:320        | Stk40         | INSIDE                 | 1.156                                                        | 0.471                          | 1316.57            | 619.55             | 0.544                          | 1027.19            | 558.54             |
| A_68_P22039928 | chr3:32716452-32716496                            | NM_001013024:-73        | Usp13         | PROMOTER               | 1.156                                                        | 1.465                          | 870.46             | 1274.93            | 1.693                          | 669.07             | 1132.52            |
| A_68_P26257412 | chr8:128946745-128946789                          | NM_174987:366           | 1810063B05Rik | INSIDE                 | 1.155                                                        | 2.405                          | 681.37             | 1638.65            | 2.777                          | 568.60             | 1578.98            |
| A_68_P28534553 | chr12:74018698-74018742                           | NM_029444:32            | 4930447C04Rik | INSIDE                 | 1.155                                                        | 3.989                          | 7108.18            | 28356.46           | 4.609                          | 5976.23            | 27542.38           |
| A_68_P23542800 | chr5:24082936-24082980                            | NM_001190443:327        | Abcf2         | INSIDE                 | 1.155                                                        | 0.589                          | 1560.59            | 919.10             | 0.680                          | 1203.93            | 818.89             |
| A_68_P28745653 | chr12:112951441-112951485                         | NM_027404:5             | Bag5          | INSIDE                 | 1.155                                                        | 1.726                          | 982.62             | 1696.40            | 1.994                          | 868.71             | 1731.79            |
| A_68_P28731506 | chr12:110272427-110272471                         | NM_001163175:33979      | Begain        | INSIDE                 | 1.155                                                        | 2.366                          | 1683.56            | 3983.20            | 2.733                          | 1420.80            | 3883.43            |
| A_68_P29056138 | chr13:55724621-55724665                           | NM_007596:277           | Caml          | INSIDE                 | 1.155                                                        | 2.478                          | 1255.29            | 3110.73            | 2.862                          | 1096.60            | 3138.88            |
| A_68_P21958960 | chr3:14886530-14886574                            | NM_009801:127           | Car2          | INSIDE                 | 1.155                                                        | 1.353                          | 2604.46            | 3524.53            | 1.563                          | 2063.90            | 3537.82            |
| A_68_P24818640 | chr6:125046428-125046472                          | NM_145979:270           | Chd4          | INSIDE                 | 1.155                                                        | 1.801                          | 701.15             | 1263.00            | 2.080                          | 738.31             | 1535.56            |
| A_68_P26885385 | chr9:121668453-121668497                          | NR_033503:587           | E530011L22Rik | INSIDE                 | 1.155                                                        | 1.646                          | 856.34             | 1409.34            | 1.900                          | 669.58             | 1272.38            |
| A_68_P32397419 | chrX:53984962-53985006                            | NM_001077361:-149       | Fhl1          | PROMOTER               | 1.155                                                        | 3.065                          | 1977.99            | 6062.99            | 3.541                          | 1065.91            | 3773.98            |
| A_68_P28099479 | chr11:105946314-105946358                         | NM_011947:121           | Map3k3        | INSIDE                 | 1.155                                                        | 1.514                          | 1454.11            | 2200.96            | 1.749                          | 1247.97            | 2182.65            |
| A_68_P21630447 | chr2:130390003-130390047                          | NM_207207:532           | Mrps26        | INSIDE                 | 1.155                                                        | 3.831                          | 1830.39            | 7011.35            | 4.426                          | 1511.55            | 6690.00            |
| A_68_P32066442 | chr19:31838948-31838992                           | NM_001013833:553        | Prkg1         | INSIDE                 | 1.155                                                        | 2.084                          | 5310.62            | 11069.05           | 2.408                          | 3956.50            | 9525.71            |
| A_68_P31256043 | chr17:56567276-56567320                           | NM_011218:48605         | Ptprs         | INSIDE                 | 1.155                                                        | 3.724                          | 3535.54            | 13167.54           | 4.301                          | 2675.37            | 11505.97           |
| A_68_P27165504 | chr10:58275815-58275859                           | NM_172788:-270          | Sh3rf3        | PROMOTER               | 1.155                                                        | 0.536                          | 969.40             | 519.69             | 0.619                          | 859.35             | 532.21             |
| A_68_P25409835 | chr7:116895803-116895847                          | NM_020050:-47           | Tmem9b        | PROMOTER               | 1.155                                                        | 1.829                          | 513.43             | 938.86             | 2.111                          | 423.64             | 894.50             |
| A_68_P21936415 | chr3:9251283-9251327                              | NM_177660:738           | Zbtb10        | INSIDE                 | 1.155                                                        | 3.331                          | 869.86             | 2897.25            | 3.848                          | 782.06             | 3009.73            |
| A_68_P31841471 | chr18:76305627-76305671                           | NM_145356:325817        | Zbtb7c        | INSIDE                 | 1.155                                                        | 2.249                          | 566.33             | 1273.67            | 2.598                          | 495.76             | 1288.20            |
| A_68_P23416422 | chr4:151460754-151460798                          | ENSMUST00000118648:-190 |               | PROMOTER               | 1.155                                                        | 2.205                          | 765.62             | 1688.31            | 2.548                          | 701.03             | 1786.12            |
| A_68_P32410982 | chrX:56820979-56821023                            | ENSMUST00000145767:-2   |               | PROMOTER               | 1.155                                                        | 1.591                          | 1587.32            | 2525.98            | 1.839                          | 819.86             | 1507.50            |
| A_68_P31791928 | chr18:67609055-67609099                           | NM_027130:-286          | Afig3l2       | PROMOTER               | 1.154                                                        | 5.143                          | 12828.58           | 65972.89           | 5.933                          | 8047.74            | 47750.72           |
| A_68_P23763013 | chr5:67009680-67009724                            | NM_009686:208           | Apbb2         | INSIDE                 | 1.154                                                        | 2.668                          | 730.51             | 1948.79            | 3.079                          | 625.01             | 1924.45            |
| A_68_P23237353 | chr4:117599338-117599382                          | NM_009711:3008          | Artn          | INSIDE                 | 1.154                                                        | 2.737                          | 650.07             | 1779.35            | 3.159                          | 563.57             | 1780.24            |
| A_68_P32397416 | chrX:53984482-53984526                            | NM_010211:-459          | Fhl1          | PROMOTER               | 1.154                                                        | 2.692                          | 598.90             | 1612.02            | 3.106                          | 371.04             | 1152.36            |
| A_68_P25189681 | chr7:73834635-73834679                            | NM_001191001:-118       | Lins          | DIVERGENT_PROMOTER     | 1.154                                                        | 2.834                          | 1821.77            | 5162.80            | 3.271                          | 1294.19            | 4233.66            |
| A_68_P24444194 | chr6:51382876-51382920                            | NM_010903:230           | Nfe2l3        | INSIDE                 | 1.154                                                        | 1.555                          | 2333.32            | 3627.26            | 1.794                          | 1802.04            | 3233.76            |
| A_68_P30346600 | chr15:76010013-76010057                           | NM_201394:16106         | Plec          | INSIDE                 | 1.154                                                        | 3.116                          | 695.31             | 2166.92            | 3.597                          | 533.84             | 1920.38            |
| A_68_P31152721 | chr17:34341412-34341456                           | NM_011530:11            | Tap2          | INSIDE                 | 1.154                                                        | 1.589                          | 558.74             | 887.67             | 1.833                          | 495.39             | 907.98             |
| A_68_P21084955 | chr2:27331406-27331450                            | NM_001113573:-235       | Brd3          | PROMOTER               | 1.153                                                        | 2.112                          | 683.68             | 1444.11            | 2.435                          | 654.59             | 1593.77            |
| A_68_P26317082 | chr9:14185179-14185223                            | NM_028013:486           | Endod1        | INSIDE                 | 1.153                                                        | 1.726                          | 1018.61            | 1757.62            | 1.989                          | 889.30             | 1769.04            |
| A_68_P24154218 | chr5:143723570-143723614                          | NM_007984:1559          | Fscn1         | INSIDE                 | 1.153                                                        | 1.589                          | 527.00             | 837.53             | 1.832                          | 385.81             | 706.67             |
| A_68_P27280645 | chr10:79516852-79516896                           | NM_001037741:93         | Gpx4          | INSIDE                 | 1.153                                                        | 6.485                          | 420.35             | 2725.92            | 7.474                          | 416.77             | 3115.07            |
| A_68_P25770032 | chr8:34763961-34764005                            | NM_010344:273           | Gsr           | INSIDE                 | 1.153                                                        | 4.055                          | 2576.34            | 10447.66           | 4.676                          | 2207.67            | 10323.87           |
| A_68_P32820568 | chrX:165758296-165758340                          | NM_008222:-43           | Hecs          | PROMOTER               | 1.153                                                        | 2.079                          | 470.76             | 978.51             | 2.397                          | 273.15             | 654.67             |
| A_68_P31876422 | chr18:82644757-82644801                           | NM_001025245:264        | Mbp           | INSIDE                 | 1.153                                                        | 2.947                          | 1321.25            | 3894.28            | 3.398                          | 1102.20            | 3744.89            |
| A_68_P20354530 | chr1:75500243-75500287                            | NM_178884:2763          | Obsl1         | INSIDE                 | 1.153                                                        | 2.068                          | 1461.22            | 3022.31            | 2.384                          | 1186.06            | 2827.44            |
| A_68_P30346578 | chr15:76007226-76007270                           | NM_201394:18892         | Plec          | INSIDE                 | 1.153                                                        | 2.602                          | 1583.85            | 4121.26            | 3.001                          | 1283.60            | 3852.48            |
| A_68_P25586915 | chr7:148317107-148317151                          | NM_013782:-56           | Ptdss2        | PROMOTER               | 1.153                                                        | 1.639                          | 1023.62            | 1678.04            | 1.891                          | 823.34             | 1556.71            |
| A_68_P27190661 | chr10:62801691-62801735                           | NM_001159590:31         | Sirt1         | INSIDE                 | 1.153                                                        | 1.703                          | 1161.69            | 1978.28            | 1.963                          | 884.11             | 1735.58            |
| A_68_P30580600 | chr16:18586533-18586577                           | NM_011532:508           | Tbx1          | INSIDE                 | 1.153                                                        | 1.395                          | 1737.24            | 2423.83            | 1.608                          | 1351.56            | 2173.74            |
| A_68_P20228140 | chr1:52687403-52687448                            | NM_001142647:-123       | Tmem194b      | PROMOTER               | 1.153                                                        | 1.901                          | 1178.02            | 2239.49            | 2.192                          | 1077.49            | 2362.21            |
| A_68_P23440602 | chr4:155158465-155158509                          | NM_001033394:1497       | Tmem88b       | INSIDE                 | 1.153                                                        | 1.632                          | 988.17             | 1612.51            | 1.881                          | 909.92             | 1711.80            |

| ProbeName      | Target position of probe on CpG island microarray | TargetID            | GeneSymbol    | CpG island Description | Ratio of relative methylation (TiO <sub>2</sub> -NP/Vehicle) | Sham group                     |                    |                    | TiO <sub>2</sub> -H group      |                    |                    |
|----------------|---------------------------------------------------|---------------------|---------------|------------------------|--------------------------------------------------------------|--------------------------------|--------------------|--------------------|--------------------------------|--------------------|--------------------|
|                |                                                   |                     |               |                        |                                                              | Relative methylation (Cy5/Cy3) | Cy3 signal (Input) | Cy5 signal (MeDIP) | Relative methylation (Cy5/Cy3) | Cy3 signal (Input) | Cy5 signal (MeDIP) |
| A_68_P23984844 | chr5:111706164-111706208                          | NM_024477:397365    | Ttc28         | INSIDE                 | 1.153                                                        | 2.010                          | 1297.30            | 2606.94            | 2.317                          | 987.23             | 2287.64            |
| A_68_P23409800 | chr4:150431562-150431606                          | NM_009498:478       | Vamp3         | INSIDE                 | 1.153                                                        | 1.425                          | 1745.14            | 2486.69            | 1.643                          | 1553.07            | 2551.70            |
| A_68_P27863350 | chr11:63892884-63892928                           | NM_178379:68        | Cox10         | INSIDE                 | 1.152                                                        | 0.551                          | 1745.95            | 962.02             | 0.635                          | 1551.37            | 985.07             |
| A_68_P30106581 | chr15:30102269-30102313                           | NM_008729:-57       | Prknd2        | PROMOTER               | 1.152                                                        | 1.929                          | 560.44             | 1080.84            | 2.221                          | 541.42             | 1202.42            |
| A_68_P31830235 | chr18:74376174-74376218                           | NM_028868:331       | Cxxx1         | INSIDE                 | 1.152                                                        | 0.571                          | 1521.91            | 868.85             | 0.658                          | 1252.81            | 824.05             |
| A_68_P28075716 | chr11:101646089-101646133                         | NM_008815:514       | Etv4          | INSIDE                 | 1.152                                                        | 1.778                          | 1326.32            | 2358.77            | 2.049                          | 1114.10            | 2282.99            |
| A_68_P31129059 | chr17:29797809-29797853                           | NM_028791:285       | Ftsjd2        | INSIDE                 | 1.152                                                        | 8.814                          | 1656.89            | 14604.27           | 10.155                         | 1605.52            | 16303.57           |
| A_68_P28080759 | chr11:102527010-102527054                         | NM_001127576:131    | Gm1564        | INSIDE                 | 1.152                                                        | 2.624                          | 1077.03            | 2825.96            | 3.023                          | 1089.15            | 3292.33            |
| A_68_P31114981 | chr17:27340635-27340679                           | NM_146075:727       | Lemd2         | INSIDE                 | 1.152                                                        | 1.503                          | 615.33             | 924.93             | 1.732                          | 482.80             | 836.27             |
| A_68_P21147646 | chr2:38207402-38207446                            | NM_010710:597       | Lhx2          | INSIDE                 | 1.152                                                        | 1.841                          | 1141.04            | 2100.71            | 2.121                          | 958.31             | 2032.12            |
| A_68_P27787407 | chr11:50038771-50038815                           | NM_145926:-44       | Mgat4b        | PROMOTER               | 1.152                                                        | 3.262                          | 814.85             | 2658.43            | 3.757                          | 726.36             | 2728.77            |
| A_68_P22747170 | chr4:14753655-14753699                            | NM_152812:58        | Oud6b         | INSIDE                 | 1.152                                                        | 1.698                          | 514.41             | 873.62             | 1.957                          | 368.39             | 720.91             |
| A_68_P22825737 | chr4:33296673-33296717                            | NM_177774:729       | Srsf12        | INSIDE                 | 1.152                                                        | 1.580                          | 1188.05            | 1876.62            | 1.820                          | 924.49             | 1682.97            |
| A_68_P31206911 | chr17:46582449-46582493                           | NM_001162864:42154  | Tbkl1         | INSIDE                 | 1.152                                                        | 2.193                          | 1789.25            | 3924.04            | 2.526                          | 1399.77            | 3536.41            |
| A_68_P21839206 | chr2:167875978-167876022                          |                     |               | Unknown                | 1.152                                                        | 1.581                          | 1258.23            | 1989.21            | 1.821                          | 1086.28            | 1978.20            |
| A_68_P26215510 | chr8:122223902-122223946                          | NM_026922:16        | Atp2c2        | INSIDE                 | 1.151                                                        | 2.071                          | 535.12             | 1108.12            | 2.383                          | 438.83             | 1045.53            |
| A_68_P27534326 | chr10:126603018-126603062                         | NM_027739:154       | B4galnt1      | INSIDE                 | 1.151                                                        | 3.016                          | 1466.51            | 4423.32            | 3.473                          | 1157.42            | 4019.34            |
| A_68_P28198046 | chr12:3982083-3982127                             | NM_001082483:56811  | Efr3b         | INSIDE                 | 1.151                                                        | 3.068                          | 3248.42            | 9965.24            | 3.532                          | 2458.78            | 8684.08            |
| A_68_P21874508 | chr2:174124774-174124818                          | NM_201617:1437      | Gnas          | INSIDE                 | 1.151                                                        | 3.335                          | 2389.18            | 7967.92            | 3.838                          | 1975.22            | 7580.59            |
| A_68_P28529997 | chr12:73171347-73171391                           | NM_181752:610       | Gpr135        | INSIDE                 | 1.151                                                        | 1.732                          | 1530.24            | 2650.15            | 1.994                          | 1318.66            | 2629.36            |
| A_68_P23812527 | chr5:76374231-76374275                            | NM_010612:201       | Kdr           | INSIDE                 | 1.151                                                        | 1.548                          | 795.11             | 1231.04            | 1.782                          | 694.36             | 1237.52            |
| A_68_P30127461 | chr15:34168406-34168450                           | NM_033521:648       | Laptn4b       | INSIDE                 | 1.151                                                        | 2.387                          | 1148.37            | 2741.12            | 2.747                          | 1087.40            | 2987.28            |
| A_68_P23264337 | chr4:123364300-123364344                          | NM_001199136:-2719  | Macf1         | PROMOTER               | 1.151                                                        | 2.167                          | 353.42             | 765.78             | 2.494                          | 283.89             | 708.15             |
| A_68_P27287761 | chr10:80616838-80616882                           | NM_021501:13605     | Pias4         | INSIDE                 | 1.151                                                        | 3.003                          | 2071.67            | 6220.81            | 3.458                          | 1748.95            | 6047.29            |
| A_68_P27385038 | chr10:98569722-98569766                           | NM_027740:-60       | Poc1b         | PROMOTER               | 1.151                                                        | 1.788                          | 601.13             | 1075.03            | 2.059                          | 609.33             | 1254.53            |
| A_68_P23440604 | chr4:155158617-155158661                          | NM_001033394:1345   | Tmem88b       | INSIDE                 | 1.151                                                        | 1.362                          | 2051.50            | 2794.00            | 1.568                          | 1740.74            | 2729.08            |
| A_68_P25842775 | chr8:48732135-48732179                            |                     |               | Unknown                | 1.151                                                        | 2.042                          | 369.10             | 753.62             | 2.350                          | 367.87             | 864.34             |
| A_68_P22150498 | chr3:54719703-54719747                            | NM_177854:85        | 6030405A18Rik | INSIDE                 | 1.150                                                        | 1.446                          | 1113.81            | 1610.68            | 1.663                          | 916.62             | 1524.09            |
| A_68_P20241449 | chr1:55419481-55419525                            | NM_001113367:49     | Boll          | INSIDE                 | 1.150                                                        | 1.747                          | 682.79             | 1193.15            | 2.010                          | 583.53             | 1172.82            |
| A_68_P24046889 | chr5:122302699-122302743                          | NM_175474:3684      | Fam109a       | INSIDE                 | 1.150                                                        | 2.068                          | 362.88             | 750.40             | 2.379                          | 270.56             | 643.62             |
| A_68_P27088635 | chr10:41023104-41023148                           | NM_133999:-79       | Fig4          | PROMOTER               | 1.150                                                        | 1.517                          | 1590.68            | 2413.02            | 1.744                          | 1381.33            | 2408.82            |
| A_68_P23968414 | chr5:108150872-108150916                          | NM_010278:2469      | Gfi1          | INSIDE                 | 1.150                                                        | 2.940                          | 832.39             | 2447.48            | 3.382                          | 726.42             | 2456.58            |
| A_68_P26891187 | chr9:122656143-122656187                          | NM_001199736:-299   | Gm9524        | PROMOTER               | 1.150                                                        | 2.222                          | 872.48             | 1938.92            | 2.555                          | 708.56             | 1810.08            |
| A_68_P26345743 | chr9:20966106-20966150                            | NM_183408:-4029     | Pde4a         | PROMOTER               | 1.150                                                        | 2.230                          | 951.45             | 2121.40            | 2.565                          | 804.78             | 2064.01            |
| A_68_P30369712 | chr15:79843045-79843089                           | NM_011057:2172      | Pdgbf         | INSIDE                 | 1.150                                                        | 2.543                          | 1051.94            | 2674.89            | 2.924                          | 878.09             | 2567.18            |
| A_68_P30346548 | chr15:76003699-76003743                           | NM_201394:22420     | Plec          | INSIDE                 | 1.150                                                        | 2.013                          | 1564.84            | 3150.25            | 2.315                          | 1141.32            | 2642.48            |
| A_68_P24085130 | chr5:129287884-129287928                          | NM_001081388:171331 | Rimbp2        | INSIDE                 | 1.150                                                        | 1.834                          | 1114.28            | 2043.87            | 2.110                          | 882.95             | 1863.05            |
| A_68_P26845374 | chr9:114472361-114472405                          | NM_001042503:1105   | Trim71        | INSIDE                 | 1.150                                                        | 1.412                          | 1198.14            | 1691.77            | 1.624                          | 945.59             | 1536.07            |
| A_68_P23297753 | chr4:129318253-129318297                          | NM_001005506:-225   | Txlna         | PROMOTER               | 1.150                                                        | 0.526                          | 2103.56            | 1106.73            | 0.605                          | 1736.42            | 1050.79            |
| A_68_P24540295 | chr6:72139369-72139413                            |                     |               | Unknown                | 1.150                                                        | 2.265                          | 2184.93            | 4948.60            | 2.605                          | 1735.39            | 4520.00            |
| A_68_P28183973 | chr11:120211378-120211422                         | NR_038126:1409      | 0610009L18Rik | INSIDE                 | 1.149                                                        | 1.619                          | 434.50             | 703.53             | 1.861                          | 401.51             | 747.19             |
| A_68_P25505914 | chr7:134656178-134656222                          | NR_024331:183       | 1700008J07Rik | INSIDE                 | 1.149                                                        | 1.740                          | 2414.76            | 4202.83            | 1.999                          | 1954.02            | 3906.12            |
| A_68_P21706322 | chr2:144096823-144096877                          | NM_028984:77        | 8430406I07Rik | INSIDE                 | 1.149                                                        | 1.735                          | 745.56             | 1293.37            | 1.993                          | 638.65             | 1273.05            |
| A_68_P28075091 | chr11:101527015-101527059                         | NM_025404:182       | Arl4d         | INSIDE                 | 1.149                                                        | 1.538                          | 1562.43            | 2402.64            | 1.767                          | 1382.73            | 2443.16            |
| A_68_P21907945 | chr2:180763668-180763712                          | NM_015730:10192     | Chra4         | INSIDE                 | 1.149                                                        | 4.048                          | 1725.01            | 6982.32            | 4.649                          | 1162.89            | 5406.42            |
| A_68_P23200238 | chr4:108953316-108953360                          | NM_007943:459       | Eps15         | INSIDE                 | 1.149                                                        | 2.136                          | 675.25             | 1442.32            | 2.454                          | 644.64             | 1581.66            |
| A_68_P30988899 | chr16:95923500-95923544                           | NM_011809:-491      | Ets2          | PROMOTER               | 1.149                                                        | 2.001                          | 716.67             | 1434.05            | 2.298                          | 614.74             | 1412.93            |
| A_68_P20553862 | chr1:120733925-120733969                          | NM_001081125:216250 | Gli2          | INSIDE                 | 1.149                                                        | 3.651                          | 1064.38            | 3885.94            | 4.196                          | 797.16             | 3344.76            |
| A_68_P27278161 | chr10:79132524-79132568                           | NM_148934:392       | Gm16517       | INSIDE                 | 1.149                                                        | 1.454                          | 1137.15            | 1653.78            | 1.671                          | 961.73             | 1607.37            |
| A_68_P31829405 | chr18:74223815-74223859                           | NM_172632:767       | Mapk4         | INSIDE                 | 1.149                                                        | 1.704                          | 1577.83            | 2689.19            | 1.959                          | 1325.20            | 2596.28            |
| A_68_P28058593 | chr11:98657535-98657579                           | NM_028722:474       | Msl1          | INSIDE                 | 1.149                                                        | 0.547                          | 1212.22            | 662.73             | 0.628                          | 1001.63            | 629.01             |

| ProbeName      | Target position of probe on CpG island microarray | TargetID                 | GeneSymbol    | CpG island Description | Ratio of relative methylation (TiO <sub>2</sub> -NP/Vehicle) | Sham group                     |                    |                    | TiO <sub>2</sub> -H group      |                    |                    |
|----------------|---------------------------------------------------|--------------------------|---------------|------------------------|--------------------------------------------------------------|--------------------------------|--------------------|--------------------|--------------------------------|--------------------|--------------------|
|                |                                                   |                          |               |                        |                                                              | Relative methylation (Cy5/Cy3) | Cy3 signal (Input) | Cy5 signal (MeDIP) | Relative methylation (Cy5/Cy3) | Cy3 signal (Input) | Cy5 signal (MeDIP) |
| A_68_P22278907 | chr3:82162344-82162388                            | NM_001081230:373         | Mtap9         | INSIDE                 | 1.149                                                        | 1.687                          | 2298.93            | 3877.82            | 1.939                          | 1837.89            | 3562.99            |
| A_68_P24758829 | chr6:113276600-113276644                          | NM_010957:-347           | Ogg1          | PROMOTER               | 1.149                                                        | 0.467                          | 1435.35            | 669.83             | 0.536                          | 1065.39            | 571.35             |
| A_68_P25354129 | chr7:105293827-105293871                          | NM_011010:109            | Omp           | INSIDE                 | 1.149                                                        | 2.062                          | 480.69             | 991.22             | 2.370                          | 372.61             | 882.90             |
| A_68_P30346547 | chr15:76003595-76003639                           | NM_201394:22524          | Plec          | INSIDE                 | 1.149                                                        | 2.174                          | 969.23             | 2107.08            | 2.498                          | 679.40             | 1696.82            |
| A_68_P25406005 | chr7:116226702-116226746                          | NM_001038624:114         | Ric3          | INSIDE                 | 1.149                                                        | 1.974                          | 926.07             | 1827.95            | 2.267                          | 797.64             | 1808.44            |
| A_68_P23467999 | chr5:8423016-8423060                              | NM_178766:189            | Sle25a40      | INSIDE                 | 1.149                                                        | 1.835                          | 449.82             | 825.36             | 2.108                          | 413.55             | 871.65             |
| A_68_P20172913 | chr1:40738293-40738337                            | NM_001033289:-242        | Sle9a2        | PROMOTER               | 1.149                                                        | 2.329                          | 495.35             | 1153.59            | 2.677                          | 517.14             | 1384.28            |
| A_68_P21330558 | chr2:73115586-73115630                            | NM_001005343:5626        | Sp9           | DOWNSTREAM             | 1.149                                                        | 2.730                          | 397.69             | 1085.74            | 3.136                          | 382.48             | 1199.60            |
| A_68_P24760943 | chr6:113647199-113647243                          | NM_001033463:-272        | Tatdn2        | PROMOTER               | 1.149                                                        | 1.568                          | 642.60             | 1007.29            | 1.801                          | 571.71             | 1029.74            |
| A_68_P20405960 | chr1:84835061-84835105                            | NM_133975:797            | Trip12        | INSIDE                 | 1.149                                                        | 1.573                          | 1164.17            | 1830.72            | 1.807                          | 964.18             | 1741.94            |
| A_68_P24066624 | chr5:125869903-125869947                          | NM_019639:463            | Ubc           | INSIDE                 | 1.149                                                        | 1.614                          | 2006.21            | 3237.36            | 1.854                          | 1637.33            | 3035.47            |
| A_68_P28992608 | chr13:43960038-43960082                           | ENSMUST00000158482:-8110 |               | PROMOTER               | 1.149                                                        | 1.561                          | 596.13             | 930.69             | 1.794                          | 545.88             | 979.56             |
| A_68_P32373279 | chrX:48194718-48194762                            | NM_133729:128            | 2610018G03Rik | INSIDE                 | 1.148                                                        | 2.034                          | 1137.10            | 2312.60            | 2.336                          | 595.41             | 1390.72            |
| A_68_P26158735 | chr8:112261518-112261562                          | NM_001080930:99          | Atxn11        | INSIDE                 | 1.148                                                        | 0.501                          | 3757.68            | 1882.24            | 0.575                          | 3104.61            | 1785.73            |
| A_68_P26920733 | chr10:7500333-7500377                             | NM_145418:361            | BC013529      | INSIDE                 | 1.148                                                        | 0.424                          | 2350.01            | 996.08             | 0.487                          | 1973.35            | 960.28             |
| A_68_P27796930 | chr11:51817853-51817897                           | NM_001166655:152         | Cdkl3         | INSIDE                 | 1.148                                                        | 1.460                          | 1417.02            | 2069.52            | 1.677                          | 1171.54            | 1965.02            |
| A_68_P26585433 | chr9:64880240-64880284                            | NM_028906:-2             | Dpp8          | PROMOTER               | 1.148                                                        | 2.027                          | 697.06             | 1413.25            | 2.328                          | 589.23             | 1371.96            |
| A_68_P30540365 | chr16:9995470-9995514                             | NM_008170:-2866          | Grin2a        | PROMOTER               | 1.148                                                        | 1.424                          | 4960.74            | 7064.25            | 1.635                          | 3680.85            | 6018.02            |
| A_68_P26954153 | chr10:13685444-13685488                           | NM_010437:-718           | Hivep2        | PROMOTER               | 1.148                                                        | 1.784                          | 1339.21            | 2388.49            | 2.047                          | 1110.57            | 2273.65            |
| A_68_P21890549 | chr2:178142357-178142402                          | NM_177191:-16            | Sypc2         | PROMOTER               | 1.148                                                        | 4.637                          | 255.79             | 1186.08            | 5.325                          | 222.49             | 1184.80            |
| A_68_P31385965 | chr17:81344280-81344324                           | NM_026516:331            | Tmem178       | INSIDE                 | 1.148                                                        | 2.017                          | 796.65             | 1606.93            | 2.316                          | 677.17             | 1568.23            |
| A_68_P32467741 | chrX:71613538-71613585                            | NM_145405:305            | Ubl4          | INSIDE                 | 1.148                                                        | 1.561                          | 1085.93            | 1694.69            | 1.792                          | 587.05             | 1052.18            |
| A_68_P22715608 | chr4:8574757-8574801                              | AK084737:-179            |               | PROMOTER               | 1.148                                                        | 1.951                          | 3467.41            | 6763.96            | 2.240                          | 3093.96            | 6931.47            |
| A_68_P26055738 | chr8:93432239-93432283                            | NM_177224:79527          | Chd9          | INSIDE                 | 1.147                                                        | 1.525                          | 696.37             | 1062.00            | 1.748                          | 661.38             | 1156.43            |
| A_68_P32219657 | chr19:59543612-59543656                           | NM_010132:10455          | Emx2          | DOWNSTREAM             | 1.147                                                        | 2.613                          | 671.78             | 1755.50            | 2.998                          | 603.73             | 1809.84            |
| A_68_P26234160 | chr8:125074869-125074913                          | NM_001037298:339         | Fam38a        | INSIDE                 | 1.147                                                        | 2.912                          | 744.90             | 2168.89            | 3.339                          | 648.66             | 2166.20            |
| A_68_P27278594 | chr10:79198492-79198536                           | NM_008226:19136          | Hen2          | INSIDE                 | 1.147                                                        | 2.836                          | 798.73             | 2265.34            | 3.254                          | 714.36             | 2324.19            |
| A_68_P25656208 | chr8:11555566-11555610                            | NM_011919:-477           | Ing1          | DIVERGENT_PROMOTER     | 1.147                                                        | 1.485                          | 1406.37            | 2088.15            | 1.703                          | 968.52             | 1649.07            |
| A_68_P30660050 | chr16:33829808-33829852                           | NM_001145884:80          | Itgb5         | INSIDE                 | 1.147                                                        | 0.524                          | 1221.84            | 640.16             | 0.601                          | 1071.45            | 643.74             |
| A_68_P20725327 | chr1:155033029-155033073                          | NM_008485:527            | Lamc2         | INSIDE                 | 1.147                                                        | 1.443                          | 2155.58            | 3109.55            | 1.655                          | 1888.68            | 3126.03            |
| A_68_P24817390 | chr6:124807543-124807587                          | NM_013534:141            | Leprel2       | INSIDE                 | 1.147                                                        | 2.965                          | 603.53             | 1789.17            | 3.401                          | 555.26             | 1888.39            |
| A_68_P30086030 | chr15:26239396-26239440                           | NM_177597:592            | Marchf11      | INSIDE                 | 1.147                                                        | 1.701                          | 1533.20            | 2607.97            | 1.951                          | 1305.56            | 2547.75            |
| A_68_P26824824 | chr9:110532605-110532649                          | NM_183276:24039          | Nbeal2        | INSIDE                 | 1.147                                                        | 2.999                          | 4559.26            | 13673.66           | 3.441                          | 3199.65            | 11009.77           |
| A_68_P25507199 | chr7:134913679-134913723                          | NM_198424:372            | Orai3         | INSIDE                 | 1.147                                                        | 1.420                          | 1173.39            | 1666.07            | 1.629                          | 908.09             | 1478.88            |
| A_68_P30369639 | chr15:79832333-79832377                           | NM_011057:12884          | Pdgrf         | INSIDE                 | 1.147                                                        | 2.403                          | 314.82             | 756.55             | 2.757                          | 274.89             | 757.78             |
| A_68_P22727584 | chr4:10935394-10935438                            | NM_175175:-650           | Plekhf2       | PROMOTER               | 1.147                                                        | 4.620                          | 3714.69            | 17162.09           | 5.301                          | 2901.09            | 15379.18           |
| A_68_P27997510 | chr11:87861570-87861615                           | NM_001078167:420         | Srsf1         | INSIDE                 | 1.147                                                        | 1.352                          | 4076.03            | 5511.77            | 1.551                          | 2952.90            | 4579.51            |
| A_68_P24539866 | chr6:72047427-72047471                            | NM_001035228:-158        | St3gal5       | PROMOTER               | 1.147                                                        | 1.742                          | 1402.30            | 2443.15            | 1.999                          | 1239.77            | 2478.14            |
| A_68_P24951681 | chr7:4982839-4982883                              | NM_001033383:10883       | Zfp865        | INSIDE                 | 1.147                                                        | 3.014                          | 1643.98            | 4955.44            | 3.459                          | 1375.69            | 4758.27            |
| A_68_P32579462 | chrX:102347389-102347433                          | AK136781:-2300           |               | PROMOTER               | 1.147                                                        | 2.156                          | 1328.61            | 2864.61            | 2.473                          | 723.39             | 1788.92            |
| A_68_P31122888 | chr17:28655312-28655356                           | ENSMUST00000114792:-865  |               | DIVERGENT_PROMOTER     | 1.147                                                        | 2.051                          | 1694.27            | 3475.54            | 2.353                          | 1360.97            | 3201.97            |
| A_68_P27371447 | chr10:96079236-96079280                           | NM_007569:-376           | Btg1          | PROMOTER               | 1.146                                                        | 1.747                          | 651.75             | 1138.68            | 2.002                          | 568.25             | 1137.36            |
| A_68_P29413813 | chr14:13654802-13654846                           | NM_001042617:769         | Cadps         | INSIDE                 | 1.146                                                        | 2.063                          | 495.72             | 1022.87            | 2.365                          | 395.06             | 934.44             |
| A_68_P23881742 | chr5:90652641-90652685                            | NM_001033310:359         | Cox18         | INSIDE                 | 1.146                                                        | 2.644                          | 1093.43            | 2891.44            | 3.030                          | 953.31             | 2888.81            |
| A_68_P30597632 | chr16:22439432-22439476                           | NM_023794:189            | Etv5          | INSIDE                 | 1.146                                                        | 1.540                          | 1122.92            | 1729.36            | 1.765                          | 1004.04            | 1772.61            |
| A_68_P23417715 | chr4:151657468-151657512                          | NM_178406:9020           | Gpr153        | INSIDE                 | 1.146                                                        | 3.479                          | 875.71             | 3046.49            | 3.985                          | 765.58             | 3051.19            |
| A_68_P31927058 | chr19:5118339-5118383                             | NM_008451:48             | Klc2          | INSIDE                 | 1.146                                                        | 2.108                          | 920.18             | 1939.91            | 2.415                          | 874.32             | 2111.86            |
| A_68_P31304303 | chr17:66450941-66450985                           | NM_028388:-131           | Ndufv2        | DIVERGENT_PROMOTER     | 1.146                                                        | 2.833                          | 293.43             | 831.27             | 3.246                          | 309.33             | 1004.13            |
| A_68_P29516148 | chr14:33015159-33015203                           | NM_011960:24             | Parg          | INSIDE                 | 1.146                                                        | 1.848                          | 1409.37            | 2604.50            | 2.117                          | 1204.44            | 2550.01            |
| A_68_P28159662 | chr11:116351581-116351625                         | NM_026364:58             | Prpsap1       | INSIDE                 | 1.146                                                        | 0.562                          | 1876.10            | 1054.65            | 0.644                          | 1526.63            | 983.73             |
| A_68_P31256044 | chr17:56567422-56567466                           | NM_011218:48459          | Ptpns         | INSIDE                 | 1.146                                                        | 2.105                          | 728.87             | 1534.11            | 2.411                          | 633.36             | 1527.06            |

| ProbeName      | Target position of probe on CpG island microarray | TargetID               | GeneSymbol    | CpG island Description | Ratio of relative methylation (TiO <sub>2</sub> -NP/Vehicle) | Sham group                     |                    |                    | TiO <sub>2</sub> -H group      |                    |                    |
|----------------|---------------------------------------------------|------------------------|---------------|------------------------|--------------------------------------------------------------|--------------------------------|--------------------|--------------------|--------------------------------|--------------------|--------------------|
|                |                                                   |                        |               |                        |                                                              | Relative methylation (Cy5/Cy3) | Cy3 signal (Input) | Cy5 signal (MeDIP) | Relative methylation (Cy5/Cy3) | Cy3 signal (Input) | Cy5 signal (MeDIP) |
| A_68_P27278801 | chr10:79229322-79229366                           | NM_144528:322          | Rnf126        | INSIDE                 | 1.146                                                        | 1.758                          | 1376.94            | 2420.31            | 2.014                          | 1173.18            | 2362.58            |
| A_68_P28267488 | chr12:16902116-16902160                           | NM_009072:355          | Rock2         | INSIDE                 | 1.146                                                        | 1.705                          | 1265.22            | 2157.44            | 1.954                          | 1185.50            | 2316.01            |
| A_68_P31857883 | chr18:79306004-79306048                           | NM_053099:104          | Setbp1        | INSIDE                 | 1.146                                                        | 2.809                          | 318.05             | 893.29             | 3.219                          | 277.81             | 894.35             |
| A_68_P31335036 | chr17:71901525-71901569                           | NM_001142631:146       | Sydy          | INSIDE                 | 1.146                                                        | 1.884                          | 1423.82            | 2682.70            | 2.159                          | 1190.81            | 2571.49            |
| A_68_P26495378 | chr9:48863573-48863617                            | NM_012039:-91          | Zw10          | PROMOTER               | 1.146                                                        | 0.584                          | 1322.24            | 772.49             | 0.669                          | 1055.85            | 706.74             |
| A_68_P31157494 | chr17:35226276-35226320                           | NM_178592:63           | Abhd16a       | INSIDE                 | 1.145                                                        | 2.161                          | 1166.14            | 2519.81            | 2.473                          | 1036.03            | 2562.23            |
| A_68_P26595208 | chr9:66643280-66643324                            | NM_177583:-72          | Aph1b         | PROMOTER               | 1.145                                                        | 1.349                          | 2023.61            | 2730.84            | 1.545                          | 1609.91            | 2486.73            |
| A_68_P20910361 | chr1:188791550-188791594                          | NM_033077:278          | D1Pas1        | INSIDE                 | 1.145                                                        | 2.999                          | 898.09             | 2693.55            | 3.434                          | 737.92             | 2534.04            |
| A_68_P27995151 | chr11:87430824-87430868                           | NM_001045527:181       | Hsf5          | INSIDE                 | 1.145                                                        | 2.852                          | 1092.69            | 3116.31            | 3.265                          | 914.23             | 2984.58            |
| A_68_P25176744 | chr7:71536910-71536954                            | NM_026483:190          | Mphosph10     | INSIDE                 | 1.145                                                        | 1.415                          | 1901.07            | 2690.74            | 1.621                          | 1565.50            | 2536.98            |
| A_68_P21766706 | chr2:155455507-155455551                          | NM_001085378:18581     | Myh7b         | INSIDE                 | 1.145                                                        | 1.445                          | 2078.49            | 3002.81            | 1.654                          | 1648.52            | 2727.10            |
| A_68_P21826985 | chr2:165818808-165818852                          | NM_008679:694          | Neoa3         | INSIDE                 | 1.145                                                        | 9.319                          | 16574.18           | 154453.60          | 10.673                         | 9712.30            | 102662.90          |
| A_68_P26143993 | chr8:109817338-109817382                          | NM_018823:-9           | Nfat5         | PROMOTER               | 1.145                                                        | 2.190                          | 1725.82            | 3780.06            | 2.509                          | 1593.99            | 3998.84            |
| A_68_P27638841 | chr11:21893689-21893733                           | NM_011023:7944         | Otx1          | DOWNSTREAM             | 1.145                                                        | 1.951                          | 665.39             | 1298.11            | 2.234                          | 529.96             | 1184.10            |
| A_68_P30422883 | chr15:88898977-88899021                           | NM_001002005:8843      | Panx2         | INSIDE                 | 1.145                                                        | 1.689                          | 1262.48            | 2131.96            | 1.933                          | 965.63             | 1866.86            |
| A_68_P24424497 | chr6:47780471-47780515                            | NM_177882:12           | Zfp786        | INSIDE                 | 1.145                                                        | 2.292                          | 1671.68            | 3831.11            | 2.624                          | 1432.27            | 3757.89            |
| A_68_P22202961 | chr3:65778787-65778831                            | AK133062:4973          |               | DOWNSTREAM             | 1.145                                                        | 1.377                          | 1272.11            | 1751.64            | 1.577                          | 1114.13            | 1757.07            |
| A_68_P26686357 | chr9:83818668-83818712                            | ENSMUST00000034801:-66 |               | PROMOTER               | 1.145                                                        | 1.667                          | 2198.69            | 3665.55            | 1.909                          | 1807.73            | 3450.68            |
| A_68_P23349887 | chr4:138686949-138686993                          | NR_033745:-18          | 2310028011Rik | PROMOTER               | 1.144                                                        | 1.610                          | 668.37             | 1076.29            | 1.842                          | 629.81             | 1160.18            |
| A_68_P23470075 | chr5:8893888-8893932                              | NM_008830:190          | Abcb4         | INSIDE                 | 1.144                                                        | 1.832                          | 1594.06            | 2919.94            | 2.096                          | 1304.42            | 2733.61            |
| A_68_P24098220 | chr5:131916295-131916339                          | NM_177047:1101897      | Auts2         | INSIDE                 | 1.144                                                        | 1.938                          | 599.95             | 1162.40            | 2.217                          | 724.89             | 1606.87            |
| A_68_P30379107 | chr15:81525500-81525544                           | NM_001164320:2195      | Chadl         | INSIDE                 | 1.144                                                        | 1.708                          | 2331.94            | 3983.76            | 1.954                          | 1946.06            | 3803.48            |
| A_68_P26756439 | chr9:97933339-97933383                            | NM_022319:226          | Clstn2        | INSIDE                 | 1.144                                                        | 2.092                          | 2083.53            | 4358.32            | 2.393                          | 1768.44            | 4231.25            |
| A_68_P22874796 | chr4:44025897-44025941                            | NM_001080384:404       | Ctla          | INSIDE                 | 1.144                                                        | 0.539                          | 2883.94            | 1554.15            | 0.616                          | 2250.60            | 1387.39            |
| A_68_P28732761 | chr12:110697987-110698031                         | NM_001190703:6344      | Dlk1          | INSIDE                 | 1.144                                                        | 1.561                          | 1106.10            | 1726.58            | 1.786                          | 1061.40            | 1895.27            |
| A_68_P22483665 | chr3:122322229-122322273                          | NM_001114665:335       | Fnbp11        | INSIDE                 | 1.144                                                        | 3.310                          | 856.91             | 2836.36            | 3.787                          | 766.56             | 2903.14            |
| A_68_P22448210 | chr3:115955054-115955098                          | NM_022427:1326         | Gpr88         | INSIDE                 | 1.144                                                        | 1.863                          | 1132.96            | 2110.22            | 2.131                          | 969.20             | 2065.07            |
| A_68_P20897164 | chr1:186556642-186556686                          | NM_008250:-292         | Hlx           | PROMOTER               | 1.144                                                        | 1.773                          | 462.95             | 820.70             | 2.027                          | 460.42             | 933.37             |
| A_68_P28068270 | chr11:100333380-100333424                         | NM_172565:694          | Kih11         | INSIDE                 | 1.144                                                        | 1.816                          | 2440.30            | 4431.08            | 2.077                          | 1895.71            | 3937.90            |
| A_68_P21548580 | chr2:115686166-115686210                          | NM_001159569:204169    | Meis2         | DOWNSTREAM             | 1.144                                                        | 0.554                          | 1024.15            | 567.65             | 0.634                          | 825.09             | 523.27             |
| A_68_P20293515 | chr1:64663797-64663841                            | NM_025964:-76          | Mettl21a      | PROMOTER               | 1.144                                                        | 1.729                          | 429.27             | 742.27             | 1.979                          | 394.61             | 780.78             |
| A_68_P21339747 | chr2:74663863-74663907                            | NM_016804:16           | Mtx2          | INSIDE                 | 1.144                                                        | 2.190                          | 327.21             | 716.61             | 2.505                          | 306.73             | 768.40             |
| A_68_P28523604 | chr12:72075575-72075619                           | NM_011184:-13          | Psma3         | PROMOTER               | 1.144                                                        | 2.010                          | 631.63             | 1269.65            | 2.299                          | 596.95             | 1372.34            |
| A_68_P21261141 | chr2:60719359-60719403                            | NM_001141931:1115      | Rbms1         | INSIDE                 | 1.144                                                        | 2.191                          | 282.47             | 618.89             | 2.505                          | 256.38             | 642.33             |
| A_68_P22336391 | chr3:93247585-93247629                            | NM_001163098:1355      | Tchh          | INSIDE                 | 1.144                                                        | 2.137                          | 1454.63            | 3109.17            | 2.446                          | 1219.93            | 2983.87            |
| A_68_P21070954 | chr2:25118703-25118747                            | NM_175286:607          | Tprn          | INSIDE                 | 1.144                                                        | 1.533                          | 1113.00            | 1705.69            | 1.753                          | 983.21             | 1723.33            |
| A_68_P27473556 | chr10:115550730-115550774                         | NM_001161855:221       | 4933416C03Rik | INSIDE                 | 1.143                                                        | 2.052                          | 496.92             | 1019.64            | 2.344                          | 432.89             | 1014.90            |
| A_68_P28609993 | chr12:87762632-87762676                           | NM_011934:61           | Esrb          | INSIDE                 | 1.143                                                        | 1.759                          | 916.15             | 1611.57            | 2.010                          | 795.42             | 1598.60            |
| A_68_P22888253 | chr4:46356368-46356412                            | NM_183298:-675         | Foxe1         | PROMOTER               | 1.143                                                        | 1.645                          | 770.29             | 1267.12            | 1.881                          | 699.15             | 1314.76            |
| A_68_P20556971 | chr1:121318266-121318310                          | NM_008381:537          | Inhb          | INSIDE                 | 1.143                                                        | 1.555                          | 965.48             | 1501.06            | 1.777                          | 918.01             | 1630.88            |
| A_68_P26258418 | chr8:129116571-129116616                          | NM_001164598:743       | Irf2bp2       | INSIDE                 | 1.143                                                        | 2.685                          | 391.89             | 1052.05            | 3.069                          | 353.53             | 1084.99            |
| A_68_P31936712 | chr19:7000456-7000500                             | NM_008431:8527         | Kenk4         | INSIDE                 | 1.143                                                        | 1.595                          | 1158.65            | 1847.83            | 1.822                          | 1029.44            | 1876.10            |
| A_68_P24045149 | chr5:121995337-121995381                          | NM_010765:543          | Mapkapk5      | INSIDE                 | 1.143                                                        | 2.283                          | 490.57             | 1119.86            | 2.608                          | 472.92             | 1233.48            |
| A_68_P20935797 | chr1:192849641-192849685                          | NM_001081259:407       | Misd7b        | INSIDE                 | 1.143                                                        | 1.410                          | 1694.90            | 2389.78            | 1.612                          | 1293.74            | 2085.69            |
| A_68_P22944674 | chr4:57313119-57313163                            | NM_011207:1569         | Ptpn3         | INSIDE                 | 1.143                                                        | 1.537                          | 1616.30            | 2484.45            | 1.756                          | 1493.44            | 2622.79            |
| A_68_P26748152 | chr9:96531410-96531454                            | NM_053268:490          | Rasa2         | INSIDE                 | 1.143                                                        | 1.840                          | 1099.73            | 2022.97            | 2.103                          | 944.73             | 1986.30            |
| A_68_P28301682 | chr12:27100225-27100269                           | NM_001081977:-125      | Rnf144a       | PROMOTER               | 1.143                                                        | 1.674                          | 1893.27            | 3169.01            | 1.913                          | 1653.53            | 3163.47            |
| A_68_P27284240 | chr10:80065867-80065911                           | NM_019575:262          | Scamp4        | INSIDE                 | 1.143                                                        | 0.461                          | 1258.91            | 580.86             | 0.527                          | 848.67             | 447.41             |
| A_68_P22031739 | chr3:30993591-30993635                            | NM_001039090:-370      | Skil          | PROMOTER               | 1.143                                                        | 2.519                          | 873.02             | 2198.71            | 2.878                          | 780.35             | 2245.49            |
| A_68_P32036072 | chr19:26679451-26679495                           | NM_011416:-177         | Smarca2       | PROMOTER               | 1.143                                                        | 1.648                          | 1021.62            | 1683.35            | 1.883                          | 841.48             | 1584.64            |
| A_68_P31962490 | chr19:12869772-12869816                           | NR_024093:819          | U05342        | INSIDE                 | 1.143                                                        | 2.436                          | 901.28             | 2195.20            | 2.784                          | 866.72             | 2413.08            |



| ProbeName      | Target position of probe on CpG island microarray | TargetID                 | GeneSymbol    | CpG island Description | Ratio of relative methylation (TiO <sub>2</sub> -NP/Vehicle) | Sham group                     |                    |                    | TiO <sub>2</sub> -H group      |                    |                    |
|----------------|---------------------------------------------------|--------------------------|---------------|------------------------|--------------------------------------------------------------|--------------------------------|--------------------|--------------------|--------------------------------|--------------------|--------------------|
|                |                                                   |                          |               |                        |                                                              | Relative methylation (Cy5/Cy3) | Cy3 signal (Input) | Cy5 signal (MeDIP) | Relative methylation (Cy5/Cy3) | Cy3 signal (Input) | Cy5 signal (MeDIP) |
| A_68_P21779874 | chr2:157740919-157740963                          | NM_198627:552            | Vstm2l        | INSIDE                 | 1.143                                                        | 3.186                          | 3156.91            | 10059.25           | 3.643                          | 2160.54            | 7870.49            |
| A_68_P21076583 | chr2:25994281-25994325                            | ENSMUST00000163836:20    |               | INSIDE                 | 1.143                                                        | 2.486                          | 5233.91            | 13009.34           | 2.842                          | 4058.83            | 11535.03           |
| A_68_P27281469 | chr10:79634617-79634661                           | NM_027207:-1050          | 1600002K03Rik | PROMOTER               | 1.142                                                        | 3.140                          | 1389.69            | 4363.61            | 3.586                          | 1101.78            | 3950.74            |
| A_68_P20416762 | chr1:89161364-89161408                            | NM_028889:448            | Efh1          | INSIDE                 | 1.142                                                        | 1.890                          | 1935.79            | 3658.56            | 2.158                          | 1768.27            | 3816.05            |
| A_68_P24138290 | chr5:140388742-140388786                          | NM_175522:4868           | Elf1          | INSIDE                 | 1.142                                                        | 1.382                          | 1371.99            | 1896.57            | 1.578                          | 1171.16            | 1848.62            |
| A_68_P24138664 | chr5:140449200-140449245                          | NM_175522:65326          | Elf1          | INSIDE                 | 1.142                                                        | 2.327                          | 1456.27            | 3388.96            | 2.657                          | 1164.39            | 3093.79            |
| A_68_P23392749 | chr4:147533784-147533828                          | NM_001161851:-102        | Fbxo44        | PROMOTER               | 1.142                                                        | 1.388                          | 1996.76            | 2771.44            | 1.585                          | 1604.84            | 2543.39            |
| A_68_P24325253 | chr6:29166069-29166113                            | NM_011829:-3819          | Impdh1        | PROMOTER               | 1.142                                                        | 2.299                          | 291.55             | 670.30             | 2.625                          | 305.52             | 802.08             |
| A_68_P32141807 | chr19:46119714-46119758                           | NM_001113408:-35         | Ldb1          | PROMOTER               | 1.142                                                        | 1.702                          | 613.53             | 1044.20            | 1.944                          | 582.83             | 1132.92            |
| A_68_P27782065 | chr11:49057416-49057460                           | NM_001110148:-254        | Mgat1         | PROMOTER               | 1.142                                                        | 1.465                          | 1555.95            | 2279.67            | 1.673                          | 1283.27            | 2146.85            |
| A_68_P23392001 | chr4:147413122-147413166                          | NM_010840:-41            | Mthfr         | DIVERGENT_PROMOTER     | 1.142                                                        | 1.696                          | 1563.37            | 2652.04            | 1.938                          | 1223.33            | 2370.34            |
| A_68_P32231475 | chrX:5045956-5046000                              | NM_010850:405            | Myos          | INSIDE                 | 1.142                                                        | 2.263                          | 636.59             | 1440.54            | 2.584                          | 348.50             | 900.51             |
| A_68_P22649654 | chr3:151928897-151928941                          | NM_199465:366            | Nexn          | INSIDE                 | 1.142                                                        | 1.382                          | 1293.67            | 1787.47            | 1.578                          | 1242.78            | 1961.73            |
| A_68_P26742969 | chr9:95537953-95537997                            | NM_029620:-72            | Peolce2       | PROMOTER               | 1.142                                                        | 1.517                          | 554.55             | 841.36             | 1.733                          | 513.29             | 889.64             |
| A_68_P22446820 | chr3:115710167-115710211                          | NM_023214:136            | Ste30a7       | INSIDE                 | 1.142                                                        | 1.587                          | 1582.11            | 2511.14            | 1.813                          | 1320.18            | 2393.82            |
| A_68_P23308817 | chr4:131429521-131429565                          | NM_020587:-11            | Srsf4         | PROMOTER               | 1.142                                                        | 3.553                          | 499.71             | 1775.50            | 4.058                          | 484.82             | 1967.52            |
| A_68_P25584910 | chr7:147973596-147973640                          | NM_001143765:135         | Sycc1         | INSIDE                 | 1.142                                                        | 3.011                          | 2858.30            | 8606.63            | 3.438                          | 2540.67            | 8734.54            |
| A_68_P28687318 | chr12:102956856-102956900                         | NM_001082976:-166        | Te2n          | PROMOTER               | 1.142                                                        | 2.347                          | 4922.48            | 11551.08           | 2.679                          | 3757.29            | 10065.84           |
| A_68_P22856580 | chr4:40216716-40216760                            | NM_134097:136            | Topors        | INSIDE                 | 1.142                                                        | 0.529                          | 1290.69            | 682.21             | 0.604                          | 1070.61            | 646.32             |
| A_68_P27033509 | chr10:28867346-28867390                           | NM_026138:3567           | 6330407J23Rik | INSIDE                 | 1.141                                                        | 1.889                          | 1801.19            | 3401.94            | 2.154                          | 1654.05            | 3563.34            |
| A_68_P20026603 | chr1:10222944-10222988                            | NM_001102430:-215        | Arfgef1       | PROMOTER               | 1.141                                                        | 1.817                          | 421.57             | 766.16             | 2.073                          | 410.39             | 850.71             |
| A_68_P32268349 | chrX:13423877-13423921                            | NM_009806:-231           | Cask          | PROMOTER               | 1.141                                                        | 2.936                          | 1476.93            | 4335.55            | 3.349                          | 937.02             | 3138.00            |
| A_68_P20619647 | chr1:134035982-134036026                          | NM_008795:258            | Cdk18         | INSIDE                 | 1.141                                                        | 2.748                          | 897.73             | 2467.03            | 3.137                          | 833.16             | 2613.40            |
| A_68_P26238529 | chr8:125736395-125736439                          | NM_145606:272            | Chmp1a        | INSIDE                 | 1.141                                                        | 1.789                          | 1769.26            | 3164.82            | 2.041                          | 1278.91            | 2610.54            |
| A_68_P23192163 | chr4:107356485-107356529                          | NM_019872:261            | Dmrtb1        | INSIDE                 | 1.141                                                        | 3.490                          | 350.53             | 1223.28            | 3.983                          | 299.05             | 1191.00            |
| A_68_P28378464 | chr12:41172641-41172685                           | NM_172803:23             | Dock4         | INSIDE                 | 1.141                                                        | 2.323                          | 320.99             | 745.72             | 2.651                          | 257.71             | 683.13             |
| A_68_P24449831 | chr6:52260423-52260467                            | NM_007966:-3047          | Evx1          | PROMOTER               | 1.141                                                        | 4.313                          | 3128.82            | 13495.28           | 4.920                          | 2577.10            | 12680.36           |
| A_68_P27995152 | chr11:87431026-87431070                           | NM_001045527:383         | Hsf5          | INSIDE                 | 1.141                                                        | 2.267                          | 1056.51            | 2395.17            | 2.587                          | 918.12             | 2374.93            |
| A_68_P20335537 | chr1:72258509-72258553                            | NM_001005423:351         | Mreg          | INSIDE                 | 1.141                                                        | 1.377                          | 1522.96            | 2097.51            | 1.572                          | 1252.36            | 1968.69            |
| A_68_P25581955 | chr7:147234797-147234841                          | NM_010836:169            | Msx3          | INSIDE                 | 1.141                                                        | 0.549                          | 1314.54            | 721.46             | 0.626                          | 1005.80            | 629.87             |
| A_68_P23393398 | chr4:147645613-147645662                          | NM_001083342:16437       | Ptchd2        | INSIDE                 | 1.141                                                        | 2.603                          | 450.79             | 1173.19            | 2.970                          | 402.37             | 1195.09            |
| A_68_P26816015 | chr9:108564655-108564699                          | NM_020520:248            | Slc25a20      | INSIDE                 | 1.141                                                        | 3.193                          | 1361.74            | 4348.06            | 3.644                          | 1274.91            | 4646.06            |
| A_68_P25954770 | chr8:73416471-73416515                            | NM_053248:164            | Slc5a5        | INSIDE                 | 1.141                                                        | 1.687                          | 1035.00            | 1745.83            | 1.925                          | 923.23             | 1777.23            |
| A_68_P22367896 | chr3:99966241-99966285                            | NM_175552:64             | Wdr3          | INSIDE                 | 1.141                                                        | 0.401                          | 1678.24            | 672.19             | 0.457                          | 1461.15            | 667.98             |
| A_68_P23154332 | chr4:100965654-100965698                          | ENSMUST00000131864:28674 |               | INSIDE                 | 1.141                                                        | 16.638                         | 2625.93            | 43691.16           | 18.986                         | 1836.30            | 34864.06           |
| A_68_P24127046 | chr5:138125901-138125945                          | NM_145566:-1             | Agfg2         | PROMOTER               | 1.140                                                        | 2.657                          | 14382.74           | 38221.34           | 3.029                          | 10803.47           | 32723.97           |
| A_68_P31549437 | chr18:22502988-22503032                           | NM_001167777:-579        | Asx13         | PROMOTER               | 1.140                                                        | 1.640                          | 1240.83            | 2034.48            | 1.869                          | 981.96             | 1834.84            |
| A_68_P26845718 | chr9:114549214-114549258                          | NM_153585:82             | Cnot10        | INSIDE                 | 1.140                                                        | 0.515                          | 1234.90            | 635.71             | 0.587                          | 937.77             | 550.11             |
| A_68_P21144122 | chr2:37642341-37642385                            | NM_001163566:10594       | Crb2          | INSIDE                 | 1.140                                                        | 1.372                          | 1424.99            | 1955.46            | 1.564                          | 1157.99            | 1811.65            |
| A_68_P26581359 | chr9:64188861-64188905                            | NM_001177784:-302        | Dis3l         | PROMOTER               | 1.140                                                        | 1.862                          | 509.42             | 948.60             | 2.124                          | 481.01             | 1021.52            |
| A_68_P31398414 | chr17:83750191-83750235                           | NM_001114361:-58         | Eml4          | PROMOTER               | 1.140                                                        | 2.021                          | 520.98             | 1052.64            | 2.303                          | 540.18             | 1244.08            |
| A_68_P29130720 | chr13:72100566-72100611                           | NM_010573:583            | Irx1          | INSIDE                 | 1.140                                                        | 1.807                          | 1014.61            | 1833.12            | 2.060                          | 1215.21            | 2503.18            |
| A_68_P24053344 | chr5:123439364-123439408                          | NM_001003953:-285        | Kdm2b         | PROMOTER               | 1.140                                                        | 2.657                          | 8288.90            | 22026.62           | 3.030                          | 5752.37            | 17428.50           |
| A_68_P26082829 | chr8:97876209-97876253                            | NM_008609:-6             | Mmp15         | PROMOTER               | 1.140                                                        | 2.947                          | 1460.00            | 4302.18            | 3.359                          | 1203.22            | 4041.79            |
| A_68_P25326013 | chr7:99817798-99817842                            | NM_029078:602            | Pcf11         | INSIDE                 | 1.140                                                        | 1.806                          | 973.23             | 1757.77            | 2.059                          | 777.02             | 1600.24            |
| A_68_P24627788 | chr6:89311893-89311937                            | NM_008881:693            | Plkna1        | INSIDE                 | 1.140                                                        | 1.583                          | 1143.52            | 1810.26            | 1.805                          | 1090.70            | 1968.78            |
| A_68_P25508221 | chr7:135079319-135079363                          | NM_001081374:10899       | Prss36        | INSIDE                 | 1.140                                                        | 2.897                          | 3483.02            | 10091.90           | 3.303                          | 2870.21            | 9479.93            |
| A_68_P31256054 | chr17:56568541-56568585                           | NM_011218:47341          | Ptprs         | INSIDE                 | 1.140                                                        | 3.934                          | 2134.59            | 8396.48            | 4.484                          | 1636.49            | 7337.60            |
| A_68_P23922674 | chr5:99681727-99681771                            | NM_145839:198            | Rasgef1b      | INSIDE                 | 1.140                                                        | 1.858                          | 1720.84            | 3198.16            | 2.118                          | 1481.41            | 3138.20            |
| A_68_P23327086 | chr4:134731348-134731392                          | NM_019732:54811          | Rumx3         | INSIDE                 | 1.140                                                        | 1.618                          | 2503.94            | 4051.62            | 1.845                          | 2053.89            | 3790.26            |
| A_68_P21747605 | chr2:151919256-151919300                          | NM_001160410:12014       | Sert2         | INSIDE                 | 1.140                                                        | 1.697                          | 1345.80            | 2283.95            | 1.935                          | 1177.80            | 2279.37            |

| ProbeName      | Target position of probe on CpG island microarray | TargetID                 | GeneSymbol    | CpG island Description | Ratio of relative methylation (TiO <sub>2</sub> -NP/Vehicle) | Sham group                     |                    |                    | TiO <sub>2</sub> -H group      |                    |                    |
|----------------|---------------------------------------------------|--------------------------|---------------|------------------------|--------------------------------------------------------------|--------------------------------|--------------------|--------------------|--------------------------------|--------------------|--------------------|
|                |                                                   |                          |               |                        |                                                              | Relative methylation (Cy5/Cy3) | Cy3 signal (Input) | Cy5 signal (MeDIP) | Relative methylation (Cy5/Cy3) | Cy3 signal (Input) | Cy5 signal (MeDIP) |
| A_68_P20151303 | chr1:36996367-36996411                            | NM_018872:-16            | Tmem131       | PROMOTER               | 1.140                                                        | 2.394                          | 2960.76            | 7088.56            | 2.729                          | 2089.12            | 5700.62            |
| A_68_P31002108 | chr16:98183316-98183360                           | NM_001081684:448         | Zfp295        | INSIDE                 | 1.140                                                        | 3.915                          | 2251.56            | 8814.55            | 4.463                          | 1684.45            | 7518.43            |
| A_68_P28053992 | chr11:97884169-97884213                           | NM_145121:-249           | Caenb1        | DIVERGENT_PROMOTER     | 1.139                                                        | 1.455                          | 4643.19            | 6755.89            | 1.658                          | 3410.85            | 5654.04            |
| A_68_P32383366 | chrX:49966645-49966690                            | NM_016697:484            | Gpc3          | INSIDE                 | 1.139                                                        | 1.660                          | 1330.07            | 2207.32            | 1.890                          | 806.06             | 1523.15            |
| A_68_P26550038 | chr9:58671669-58671713                            | NM_001081192:372         | Hcn4          | INSIDE                 | 1.139                                                        | 0.507                          | 1451.40            | 736.01             | 0.578                          | 1245.16            | 719.43             |
| A_68_P21321484 | chr2:71625261-71625305                            | NM_008397:143            | Irga6         | INSIDE                 | 1.139                                                        | 2.643                          | 523.77             | 1384.25            | 3.011                          | 438.63             | 1320.81            |
| A_68_P32136345 | chr19:45154436-45154480                           | NM_178929:3830           | Kazald1       | DOWNSTREAM             | 1.139                                                        | 1.859                          | 3426.28            | 6369.98            | 2.117                          | 2584.79            | 5472.58            |
| A_68_P20348303 | chr1:74438925-74438969                            | NR_029743:-1937          | Mir26b        | PROMOTER               | 1.139                                                        | 0.527                          | 1036.31            | 545.76             | 0.600                          | 838.60             | 502.94             |
| A_68_P24051802 | chr5:123157935-123157979                          | NM_011026:391            | P2rx4         | INSIDE                 | 1.139                                                        | 2.251                          | 1115.71            | 2511.71            | 2.563                          | 987.41             | 2531.14            |
| A_68_P24046733 | chr5:122278943-122278987                          | NM_008507:7846           | Sh2b3         | INSIDE                 | 1.139                                                        | 3.173                          | 1425.63            | 4522.86            | 3.613                          | 1344.28            | 4857.28            |
| A_68_P23608246 | chr5:36873249-36873293                            | NM_001113364:2           | Tbc1d14       | INSIDE                 | 1.139                                                        | 1.530                          | 938.48             | 1436.30            | 1.743                          | 846.96             | 1476.35            |
| A_68_P26891892 | chr9:122795954-122795998                          | NM_001177505:-1612       | Zfp167        | PROMOTER               | 1.139                                                        | 2.196                          | 1661.44            | 3648.76            | 2.501                          | 1448.05            | 3622.28            |
| A_68_P32672910 | chrX:131160541-131160585                          | ENSMUST00000137737:-279  |               | PROMOTER               | 1.139                                                        | 2.091                          | 913.69             | 1910.42            | 2.382                          | 512.07             | 1219.71            |
| A_68_P28743345 | chr12:112556826-112556880                         | NM_183016:59077          | Cdc42bpb      | INSIDE                 | 1.138                                                        | 1.685                          | 641.65             | 1081.46            | 1.918                          | 571.57             | 1096.48            |
| A_68_P23200235 | chr4:108952879-108952923                          | NM_007943:21             | Eps15         | INSIDE                 | 1.138                                                        | 1.769                          | 2860.81            | 5060.18            | 2.013                          | 2362.74            | 4755.71            |
| A_68_P27141570 | chr10:53018974-53019019                           | NM_001204983:80661       | Gm9766        | INSIDE                 | 1.138                                                        | 1.796                          | 484.83             | 870.64             | 2.044                          | 421.73             | 861.87             |
| A_68_P28043344 | chr11:96133745-96133789                           | NM_008270:1123           | Hoxb9         | INSIDE                 | 1.138                                                        | 2.292                          | 551.78             | 1264.92            | 2.609                          | 512.96             | 1338.40            |
| A_68_P27902199 | chr11:70513617-70513661                           | NM_213729:19             | Inca1         | INSIDE                 | 1.138                                                        | 1.931                          | 1131.10            | 2183.78            | 2.197                          | 1057.60            | 2324.01            |
| A_68_P30682958 | chr16:37868795-37868839                           | NM_177093:331            | Lrre58        | INSIDE                 | 1.138                                                        | 2.125                          | 405.07             | 860.73             | 2.418                          | 408.08             | 986.86             |
| A_68_P27011027 | chr10:24589834-24589878                           | NM_001166416:65          | Med23         | INSIDE                 | 1.138                                                        | 1.418                          | 1286.73            | 1825.18            | 1.614                          | 1096.31            | 1769.01            |
| A_68_P28269967 | chr12:17355126-17355170                           | NM_001008421:-150        | Nol10         | PROMOTER               | 1.138                                                        | 1.505                          | 2601.68            | 3914.40            | 1.713                          | 2127.26            | 3643.00            |
| A_68_P23409032 | chr4:150283998-150284042                          | NM_020569:10             | Park7         | INSIDE                 | 1.138                                                        | 1.564                          | 1909.68            | 2987.47            | 1.780                          | 1617.75            | 2879.64            |
| A_68_P31632591 | chr18:38357539-38357583                           | NM_029357:11856          | Pcdh1         | INSIDE                 | 1.138                                                        | 3.034                          | 1272.71            | 3861.54            | 3.452                          | 901.81             | 3113.24            |
| A_68_P30423564 | chr15:88991163-88991207                           | NM_001159521:13096       | Plxnb2        | INSIDE                 | 1.138                                                        | 3.484                          | 884.01             | 3079.79            | 3.966                          | 776.42             | 3078.92            |
| A_68_P25771677 | chr8:35040417-35040461                            | NM_001042674:-125        | Rbpms         | PROMOTER               | 1.138                                                        | 1.564                          | 624.97             | 977.15             | 1.780                          | 778.65             | 1385.70            |
| A_68_P25025186 | chr7:29856672-29856716                            | NM_009109:53476          | Ryr1          | INSIDE                 | 1.138                                                        | 1.893                          | 711.20             | 1346.42            | 2.154                          | 526.30             | 1133.49            |
| A_68_P21843418 | chr2:168591344-168591388                          | NM_175303:1335           | Sall4         | INSIDE                 | 1.138                                                        | 3.052                          | 1325.71            | 4045.75            | 3.472                          | 1107.27            | 3843.90            |
| A_68_P31709384 | chr18:52928549-52928593                           | NM_001199154:773         | Sncap1        | INSIDE                 | 1.138                                                        | 1.390                          | 2108.75            | 2931.07            | 1.581                          | 1716.34            | 2713.76            |
| A_68_P24432386 | chr6:49345471-49345515                            | NM_029916:-110           | Stk31         | PROMOTER               | 1.138                                                        | 2.814                          | 977.94             | 2752.31            | 3.204                          | 750.59             | 2404.82            |
| A_68_P21748556 | chr2:152119601-152119645                          | NM_024196:15             | Tbc1d20       | INSIDE                 | 1.138                                                        | 2.451                          | 430.45             | 1054.87            | 2.789                          | 382.58             | 1067.10            |
| A_68_P27641463 | chr11:22412449-22412493                           | NM_153596:185            | Tmem17        | INSIDE                 | 1.138                                                        | 3.343                          | 1232.01            | 4118.01            | 3.802                          | 1073.40            | 4081.58            |
| A_68_P23185612 | chr4:106311841-106311885                          | NM_177667:16809          | Tie22         | INSIDE                 | 1.138                                                        | 2.496                          | 1130.44            | 2821.23            | 2.841                          | 981.37             | 2788.35            |
| A_68_P20827839 | chr1:173341981-173342025                          | NM_009480:191            | Usf1          | INSIDE                 | 1.138                                                        | 1.812                          | 1426.53            | 2585.04            | 2.063                          | 1148.99            | 2370.41            |
| A_68_P30401334 | chr15:85374054-85374098                           | NM_001163634:34424       | Wnt7b         | INSIDE                 | 1.138                                                        | 2.942                          | 1235.10            | 3634.16            | 3.348                          | 1139.66            | 3816.09            |
| A_68_P33013883 | chrUn_random:3232956-3233000                      |                          |               | Unknown                | 1.138                                                        | 2.077                          | 846.94             | 1758.82            | 2.363                          | 678.87             | 1603.83            |
| A_68_P27340461 | chr10:90644609-90644653                           | ENSMUST00000099357:-9871 |               | PROMOTER               | 1.138                                                        | 0.507                          | 1087.58            | 550.98             | 0.576                          | 969.83             | 558.94             |
| A_68_P31939680 | chr19:7491931-7491975                             | NM_175381:-162           | 2700081O15Rik | PROMOTER               | 1.137                                                        | 1.690                          | 1418.97            | 2398.14            | 1.922                          | 1138.96            | 2189.30            |
| A_68_P22398700 | chr3:105507744-105507788                          | NM_001163356:-609        | 6530418L21Rik | PROMOTER               | 1.137                                                        | 2.276                          | 691.12             | 1573.21            | 2.587                          | 624.36             | 1615.33            |
| A_68_P27339935 | chr10:90545393-90545437                           | NM_001042558:74          | Apaf1         | INSIDE                 | 1.137                                                        | 0.475                          | 1087.17            | 516.72             | 0.540                          | 1031.02            | 556.96             |
| A_68_P22058858 | chr3:36470838-36470882                            | NM_009828:58             | Cena2         | INSIDE                 | 1.137                                                        | 2.578                          | 1330.56            | 3430.10            | 2.930                          | 1130.50            | 3312.56            |
| A_68_P20139530 | chr1:34636521-34636565                            | NM_213727:5              | Fam123c       | INSIDE                 | 1.137                                                        | 1.978                          | 1105.59            | 2186.87            | 2.248                          | 984.97             | 2214.32            |
| A_68_P22450556 | chr3:116365109-116365153                          | NM_008246:465            | Hiat1         | INSIDE                 | 1.137                                                        | 2.950                          | 661.58             | 1951.71            | 3.354                          | 600.60             | 2014.56            |
| A_68_P21309973 | chr2:69423496-69423540                            | NM_001081088:606         | Lrp2          | INSIDE                 | 1.137                                                        | 1.706                          | 653.63             | 1115.20            | 1.940                          | 655.63             | 1271.97            |
| A_68_P21044978 | chr2:19367856-19367900                            | NM_018809:589            | Ptfla         | INSIDE                 | 1.137                                                        | 1.407                          | 1024.31            | 1440.82            | 1.600                          | 846.03             | 1353.62            |
| A_68_P29622735 | chr14:57021569-57021613                           | NM_001033043:57          | Rnf17         | INSIDE                 | 1.137                                                        | 3.045                          | 2228.51            | 6786.90            | 3.464                          | 1777.25            | 6156.76            |
| A_68_P26750481 | chr9:96919029-96919073                            | NM_145134:-276           | Spsb4         | PROMOTER               | 1.137                                                        | 1.712                          | 833.14             | 1426.16            | 1.946                          | 713.38             | 1388.25            |
| A_68_P28166384 | chr11:117515968-117516012                         | NM_198022:388            | Tnrc6c        | INSIDE                 | 1.137                                                        | 1.546                          | 1191.84            | 1842.42            | 1.757                          | 1029.05            | 1808.44            |
| A_68_P24638741 | chr6:91344683-91344727                            | NM_009527:16659          | Wnt7a         | INSIDE                 | 1.137                                                        | 2.113                          | 258.94             | 547.12             | 2.403                          | 210.85             | 506.75             |
| A_68_P29373467 | chr14:4829490-4829534                             | ENSMUST00000165619:-301  |               | PROMOTER               | 1.137                                                        | 2.836                          | 3584.78            | 10166.21           | 3.224                          | 3373.19            | 10874.69           |
| A_68_P31746201 | chr18:59335430-59335474                           | NM_001081328:459         | Chsy3         | INSIDE                 | 1.136                                                        | 0.479                          | 1428.60            | 683.91             | 0.544                          | 1166.90            | 634.86             |
| A_68_P25948480 | chr8:72406164-72406208                            | NM_026818:5105           | Cilp2         | INSIDE                 | 1.136                                                        | 2.662                          | 565.04             | 1504.40            | 3.024                          | 564.02             | 1705.81            |

| ProbeName      | Target position of probe on CpG island microarray | TargetID               | GeneSymbol    | CpG island Description | Ratio of relative methylation (TiO <sub>2</sub> -NP/Vehicle) | Sham group                     |                    |                    | TiO <sub>2</sub> -H group      |                    |                    |
|----------------|---------------------------------------------------|------------------------|---------------|------------------------|--------------------------------------------------------------|--------------------------------|--------------------|--------------------|--------------------------------|--------------------|--------------------|
|                |                                                   |                        |               |                        |                                                              | Relative methylation (Cy5/Cy3) | Cy3 signal (Input) | Cy5 signal (MeDIP) | Relative methylation (Cy5/Cy3) | Cy3 signal (Input) | Cy5 signal (MeDIP) |
| A_68_P29334873 | chr13:113254637-113254681                         | NM_010560:381          | Il6st         | INSIDE                 | 1.136                                                        | 1.546                          | 2638.65            | 4079.29            | 1.756                          | 2019.87            | 3547.22            |
| A_68_P24804565 | chr6:121423791-121423835                          | NM_001033354:-116      | Iqsec3        | PROMOTER               | 1.136                                                        | 0.548                          | 1171.87            | 641.70             | 0.622                          | 977.95             | 608.46             |
| A_68_P21239895 | chr2:56954793-56954837                            | NM_013613:12635        | Nr4a2         | DOWNSTREAM             | 1.136                                                        | 0.561                          | 1099.56            | 616.62             | 0.637                          | 1074.70            | 684.82             |
| A_68_P22778509 | chr4:22415123-22415167                            | NM_008899:134          | Pou3f2        | INSIDE                 | 1.136                                                        | 1.829                          | 762.99             | 1395.40            | 2.077                          | 650.63             | 1351.26            |
| A_68_P30390277 | chr15:83555041-83555085                           | NM_022723:389          | Scube1        | INSIDE                 | 1.136                                                        | 2.018                          | 1445.64            | 2917.40            | 2.293                          | 1238.70            | 2840.08            |
| A_68_P21116239 | chr2:32442606-32442650                            | NM_0111373:-381        | St6galnac4    | PROMOTER               | 1.136                                                        | 1.902                          | 470.62             | 895.15             | 2.161                          | 458.76             | 991.20             |
| A_68_P24880088 | chr6:137683751-137683795                          | NM_011499:170          | Strap         | INSIDE                 | 1.136                                                        | 2.621                          | 467.53             | 1225.55            | 2.977                          | 490.12             | 1459.09            |
| A_68_P31254298 | chr17:56301931-56301975                           | NM_025566:39           | Tnfaip8l1     | INSIDE                 | 1.136                                                        | 1.441                          | 1132.24            | 1631.07            | 1.637                          | 894.21             | 1463.53            |
| A_68_P28787946 | chr13:3358712-3358756                             |                        |               | Unknown                | 1.136                                                        | 2.407                          | 840.16             | 2022.29            | 2.734                          | 774.05             | 2116.13            |
| A_68_P22039461 | chr3:32608077-32608121                            | NM_019673:631          | Actl6a        | INSIDE                 | 1.135                                                        | 1.884                          | 860.68             | 1621.38            | 2.139                          | 815.82             | 1744.81            |
| A_68_P24994776 | chr7:20282146-20282190                            | NM_009696:2347         | Apoe          | INSIDE                 | 1.135                                                        | 2.429                          | 696.47             | 1691.65            | 2.756                          | 624.91             | 1722.34            |
| A_68_P23262160 | chr4:123020018-123020062                          | NM_007558:6            | Bmp8a         | INSIDE                 | 1.135                                                        | 0.545                          | 1865.12            | 1016.77            | 0.619                          | 1467.31            | 907.87             |
| A_68_P26813082 | chr9:108012831-108012875                          | NM_007567:79862        | Bsn           | INSIDE                 | 1.135                                                        | 2.328                          | 1586.69            | 3694.61            | 2.642                          | 1263.38            | 3337.69            |
| A_68_P21580764 | chr2:121239313-121239357                          | NM_153075:194          | Catsper2      | INSIDE                 | 1.135                                                        | 1.616                          | 4136.12            | 6685.98            | 1.835                          | 3328.44            | 6108.71            |
| A_68_P25601118 | chr7:150651001-150651045                          | NM_001161624:-4067     | Cdkn1c        | DIVERGENT_PROMOTER     | 1.135                                                        | 3.697                          | 454.16             | 1679.14            | 4.198                          | 443.60             | 1862.18            |
| A_68_P27476526 | chr10:116018789-116018833                         | NM_001037846:-243      | Cnot2         | PROMOTER               | 1.135                                                        | 3.158                          | 1799.87            | 5683.88            | 3.585                          | 1572.05            | 5636.01            |
| A_68_P21706813 | chr2:144194864-144194908                          | NM_181417:116          | Csrp2bp       | INSIDE                 | 1.135                                                        | 1.860                          | 547.64             | 1018.78            | 2.111                          | 480.48             | 1014.22            |
| A_68_P29737940 | chr14:77556610-77556654                           | NM_172813:10           | Enox1         | INSIDE                 | 1.135                                                        | 1.449                          | 758.66             | 1099.67            | 1.646                          | 686.66             | 1130.12            |
| A_68_P28928669 | chr13:32430434-32430478                           | NM_146041:-43          | Gmtds         | PROMOTER               | 1.135                                                        | 0.534                          | 1486.36            | 793.48             | 0.606                          | 1327.02            | 804.05             |
| A_68_P21933421 | chr3:8667100-8667144                              | NM_010423:-84          | Hey1          | PROMOTER               | 1.135                                                        | 2.545                          | 573.08             | 1458.68            | 2.888                          | 516.10             | 1490.73            |
| A_68_P25528245 | chr7:138553702-138553746                          | NM_175115:268          | Ikzf5         | INSIDE                 | 1.135                                                        | 0.399                          | 1405.83            | 560.46             | 0.453                          | 1239.71            | 561.09             |
| A_68_P27484949 | chr10:117578950-117578994                         | NM_001162904:130       | Mdm1          | INSIDE                 | 1.135                                                        | 1.405                          | 1467.01            | 2061.57            | 1.595                          | 1226.56            | 1956.14            |
| A_68_P24894481 | chr6:140372708-140372752                          | NM_144920:111          | Plekha5       | INSIDE                 | 1.135                                                        | 1.474                          | 1618.55            | 2385.49            | 1.673                          | 1491.83            | 2496.12            |
| A_68_P31953479 | chr19:10969598-10969642                           | NM_134129:-161         | Prpf19        | PROMOTER               | 1.135                                                        | 1.778                          | 396.41             | 704.95             | 2.019                          | 365.25             | 737.54             |
| A_68_P24125229 | chr5:137774819-137774863                          | NM_031406:-30          | Slc12a9       | PROMOTER               | 1.135                                                        | 1.499                          | 6017.14            | 9021.20            | 1.701                          | 3977.16            | 6766.42            |
| A_68_P32319890 | chrX:34283973-34284017                            | NM_001085497:341       | Sle2sa43      | INSIDE                 | 1.135                                                        | 1.505                          | 1027.93            | 1547.46            | 1.709                          | 543.60             | 929.16             |
| A_68_P30360708 | chr15:78370197-78370241                           | NM_009218:4557         | Sstr3         | INSIDE                 | 1.135                                                        | 1.654                          | 888.91             | 1470.41            | 1.878                          | 768.68             | 1443.43            |
| A_68_P26470629 | chr9:44773701-44773745                            | NM_145400:-39          | Ube4a         | PROMOTER               | 1.135                                                        | 1.939                          | 1914.96            | 3712.77            | 2.200                          | 1453.61            | 3198.39            |
| A_68_P20505871 | chr1:107887105-107887149                          | NM_001122675:144       | Zcche2        | INSIDE                 | 1.135                                                        | 2.550                          | 1079.51            | 2753.24            | 2.894                          | 823.13             | 2382.24            |
| A_68_P32975879 | A_68_P32975879                                    |                        |               | Unknown                | 1.135                                                        | 1.732                          | 929.03             | 1608.98            | 1.966                          | 944.61             | 1857.17            |
| A_68_P32983000 | A_68_P32983000                                    |                        |               | Unknown                | 1.135                                                        | 2.262                          | 775.27             | 1753.61            | 2.568                          | 794.92             | 2041.58            |
| A_68_P26080209 | chr8:97437362-97437406                            | NM_001033533:4614      | Ccdc102a      | INSIDE                 | 1.134                                                        | 1.537                          | 990.63             | 1522.27            | 1.743                          | 796.04             | 1387.28            |
| A_68_P29613438 | chr14:55260166-55260210                           | NM_199470:13           | Cdh24         | INSIDE                 | 1.134                                                        | 1.897                          | 737.77             | 1399.69            | 2.151                          | 683.00             | 1469.00            |
| A_68_P24798785 | chr6:120443882-120443926                          | NM_033567:-79          | Cecr6         | PROMOTER               | 1.134                                                        | 1.745                          | 478.57             | 835.24             | 1.978                          | 448.44             | 887.20             |
| A_68_P26505264 | chr9:50536185-50536229                            | NM_178118:-117         | Dixd1         | PROMOTER               | 1.134                                                        | 1.567                          | 701.53             | 1099.40            | 1.777                          | 604.16             | 1073.40            |
| A_68_P26523445 | chr9:53822873-53822917                            | NM_177769:214          | Elmod1        | INSIDE                 | 1.134                                                        | 0.553                          | 1270.53            | 702.32             | 0.627                          | 1094.15            | 685.93             |
| A_68_P28675862 | chr12:100630292-100630340                         | NM_183186:57968        | Foxn3         | INSIDE                 | 1.134                                                        | 1.880                          | 295.02             | 554.51             | 2.131                          | 296.99             | 632.87             |
| A_68_P24658382 | chr6:94649670-94649714                            | NM_008377:447          | Lrig1         | INSIDE                 | 1.134                                                        | 1.895                          | 379.50             | 719.02             | 2.149                          | 322.08             | 692.01             |
| A_68_P24009588 | chr5:115890672-115890717                          | NM_008629:11001        | Msi1          | INSIDE                 | 1.134                                                        | 4.011                          | 469.76             | 1884.44            | 4.551                          | 374.48             | 1704.11            |
| A_68_P31629193 | chr18:37829497-37829541                           | NM_033586:-4470        | Pedhga3       | PROMOTER               | 1.134                                                        | 2.242                          | 516.06             | 1156.85            | 2.543                          | 426.68             | 1085.05            |
| A_68_P32536213 | chrX:91077623-91077667                            | NM_145630:-210         | Pdk3          | PROMOTER               | 1.134                                                        | 1.632                          | 1149.18            | 1875.44            | 1.850                          | 558.78             | 1033.82            |
| A_68_P24059429 | chr5:124573689-124573733                          | NM_011256:92717        | Pitpnm2       | INSIDE                 | 1.134                                                        | 3.249                          | 669.87             | 2176.50            | 3.685                          | 567.36             | 2090.99            |
| A_68_P30729957 | chr16:46010656-46010700                           | NM_001134480:-152      | Plexd2        | PROMOTER               | 1.134                                                        | 1.632                          | 1086.91            | 1773.71            | 1.850                          | 987.21             | 1826.10            |
| A_68_P28740620 | chr12:112079116-112079160                         | NM_011973:11           | Stk30         | INSIDE                 | 1.134                                                        | 2.221                          | 355.68             | 789.89             | 2.518                          | 323.07             | 813.64             |
| A_68_P22955049 | chr4:59202246-59202290                            | NM_011673:-153         | Ugeg          | PROMOTER               | 1.134                                                        | 2.748                          | 474.71             | 1304.46            | 3.115                          | 474.73             | 1478.80            |
| A_68_P24427163 | chr6:48388218-48388262                            | NM_001085415:6849      | Zfp467        | INSIDE                 | 1.134                                                        | 1.788                          | 1596.39            | 2854.54            | 2.027                          | 1261.90            | 2558.29            |
| A_68_P21934023 | chr3:8767607-8767651                              |                        |               | Unknown                | 1.134                                                        | 2.092                          | 3179.25            | 6649.98            | 2.372                          | 2285.15            | 5419.68            |
| A_68_P32410984 | chrX:56821241-56821285                            | ENSMUST00000119833:-14 |               | PROMOTER               | 1.134                                                        | 1.938                          | 432.75             | 838.84             | 2.198                          | 268.01             | 589.07             |
| A_68_P23391463 | chr4:147315197-147315241                          | NM_029841:215          | 2510039018Rik | INSIDE                 | 1.133                                                        | 1.956                          | 904.26             | 1768.69            | 2.216                          | 743.95             | 1648.92            |
| A_68_P21776100 | chr2:157105079-157105123                          | NM_001039557:185       | 4922505G16Rik | INSIDE                 | 1.133                                                        | 1.601                          | 932.72             | 1493.56            | 1.814                          | 809.44             | 1468.62            |
| A_68_P23447647 | chr5:3928400-3928444                              | NM_194462:237          | Akap9         | INSIDE                 | 1.133                                                        | 1.419                          | 1319.18            | 1871.49            | 1.607                          | 1160.21            | 1865.01            |

| ProbeName      | Target position of probe on CpG island microarray | TargetID                 | GeneSymbol    | CpG island Description | Ratio of relative methylation (TiO <sub>2</sub> -NP/Vehicle) | Sham group                     |                    |                    | TiO <sub>2</sub> -H group      |                    |                    |
|----------------|---------------------------------------------------|--------------------------|---------------|------------------------|--------------------------------------------------------------|--------------------------------|--------------------|--------------------|--------------------------------|--------------------|--------------------|
|                |                                                   |                          |               |                        |                                                              | Relative methylation (Cy5/Cy3) | Cy3 signal (Input) | Cy5 signal (MeDIP) | Relative methylation (Cy5/Cy3) | Cy3 signal (Input) | Cy5 signal (MeDIP) |
| A_68_P21673348 | chr2:138082206-138082250                          | NM_001025431-91          | Btbd3         | PROMOTER               | 1.133                                                        | 3.215                          | 1850.87            | 5950.56            | 3.642                          | 1537.36            | 5599.36            |
| A_68_P25047616 | chr7:35905038-35905082                            | NM_007678:749            | Cebpa         | INSIDE                 | 1.133                                                        | 0.539                          | 4210.42            | 2271.41            | 0.611                          | 3692.96            | 2256.50            |
| A_68_P20148716 | chr1:36568774-36568818                            | NM_001039551:76          | Cnmm3         | INSIDE                 | 1.133                                                        | 3.034                          | 2912.87            | 8838.60            | 3.437                          | 2339.06            | 8038.66            |
| A_68_P25083573 | chr7:50930678-50930722                            | NM_145582:3300           | Ctuf1         | INSIDE                 | 1.133                                                        | 2.076                          | 826.67             | 1716.12            | 2.352                          | 763.67             | 1795.91            |
| A_68_P31620540 | chr18:36020339-36020383                           | NM_133687:30889          | Cxxx5         | INSIDE                 | 1.133                                                        | 3.049                          | 1031.39            | 3144.98            | 3.455                          | 827.36             | 2858.70            |
| A_68_P25496227 | chr7:132851431-132851475                          | NM_001081022:63          | D430042O09Rik | INSIDE                 | 1.133                                                        | 2.950                          | 470.41             | 1387.85            | 3.341                          | 428.30             | 1431.11            |
| A_68_P29626122 | chr14:57723066-57723110                           | NM_008125:451            | Gjb2          | INSIDE                 | 1.133                                                        | 0.447                          | 1816.05            | 812.43             | 0.507                          | 1475.09            | 747.34             |
| A_68_P21817704 | chr2:164239982-164240026                          | NM_013592:-9890          | Matn4         | PROMOTER               | 1.133                                                        | 2.320                          | 2606.22            | 6046.12            | 2.629                          | 1994.86            | 5244.03            |
| A_68_P28246306 | chr12:12948314-12948358                           | NM_008709:306            | Mycn          | INSIDE                 | 1.133                                                        | 1.839                          | 1193.87            | 2195.91            | 2.084                          | 1001.15            | 2086.53            |
| A_68_P22355468 | chr3:97462189-97462238                            | NM_182997:79             | Prkab2        | INSIDE                 | 1.133                                                        | 1.784                          | 1722.40            | 3073.42            | 2.021                          | 1329.38            | 2686.69            |
| A_68_P24325039 | chr6:29129114-29129158                            | NM_001101443:448         | Prrt4         | INSIDE                 | 1.133                                                        | 2.009                          | 351.20             | 705.47             | 2.276                          | 402.57             | 916.34             |
| A_68_P22383501 | chr3:102739596-102739640                          | NM_011516:405            | Sycp1         | INSIDE                 | 1.133                                                        | 2.771                          | 1127.57            | 3124.35            | 3.139                          | 952.37             | 2989.38            |
| A_68_P28936502 | chr13:34169897-34169941                           | NM_009450:-41            | Tubb2a        | PROMOTER               | 1.133                                                        | 1.555                          | 1520.94            | 2364.84            | 1.762                          | 1313.99            | 2314.93            |
| A_68_P20286081 | chr1:63320021-63320065                            | NM_028673:200            | Zdbf2         | INSIDE                 | 1.133                                                        | 1.418                          | 1173.03            | 1663.37            | 1.607                          | 1090.62            | 1752.33            |
| A_68_P28603808 | A_68_P28603808                                    |                          |               | Unknown                | 1.133                                                        | 2.003                          | 919.76             | 1842.41            | 2.269                          | 826.92             | 1876.64            |
| A_68_P26467841 | chr9:44291334-44291378                            | ENSMUST00000136322:4496  |               | DOWNSTREAM             | 1.133                                                        | 2.280                          | 1789.97            | 4082.00            | 2.584                          | 1453.44            | 3755.63            |
| A_68_P23315558 | chr4:132617847-132617891                          | NM_146155:50448          | Ahde1         | INSIDE                 | 1.132                                                        | 2.539                          | 2589.28            | 6574.24            | 2.874                          | 2032.85            | 5841.54            |
| A_68_P31613237 | chr18:34666453-34666497                           | NM_146084:3              | Fam13b        | INSIDE                 | 1.132                                                        | 1.462                          | 2874.26            | 4203.33            | 1.655                          | 2339.14            | 3870.69            |
| A_68_P23969766 | chr5:108415737-108415781                          | NM_026062:338            | Fam69a        | INSIDE                 | 1.132                                                        | 1.456                          | 2521.27            | 3670.94            | 1.648                          | 2070.27            | 3412.25            |
| A_68_P22789254 | chr10:80841374-80841418                           | NM_019757:-281           | Fzr1          | DIVERGENT_PROMOTER     | 1.132                                                        | 1.610                          | 9507.21            | 15305.59           | 1.822                          | 6175.11            | 11253.25           |
| A_68_P22785943 | chr4:24423379-24423423                            | NM_199467:-208           | Mms221        | PROMOTER               | 1.132                                                        | 2.328                          | 1320.57            | 3073.64            | 2.635                          | 1149.53            | 3028.70            |
| A_68_P23348674 | chr4:138469719-138469763                          | NM_028453:122            | Otud3         | INSIDE                 | 1.132                                                        | 4.680                          | 283.97             | 1328.95            | 5.299                          | 266.72             | 1413.40            |
| A_68_P25435746 | chr7:121558834-121558878                          | NM_011055:89             | Pde3b         | INSIDE                 | 1.132                                                        | 1.823                          | 732.04             | 1334.45            | 2.063                          | 693.75             | 1431.19            |
| A_68_P22312796 | chr3:88058579-88058623                            | NM_021375:6              | Rhbg          | INSIDE                 | 1.132                                                        | 0.517                          | 1728.80            | 893.81             | 0.585                          | 1309.53            | 766.10             |
| A_68_P28517710 | chr12:71088293-71088337                           | NM_022028:-325           | Sav1          | PROMOTER               | 1.132                                                        | 2.472                          | 1362.43            | 3367.50            | 2.797                          | 1247.11            | 3487.91            |
| A_68_P30370350 | chr15:79963500-79963544                           | NM_025609:-61            | Tab1          | PROMOTER               | 1.132                                                        | 2.273                          | 1546.40            | 3514.63            | 2.573                          | 1215.44            | 3127.29            |
| A_68_P20552782 | chr1:120524517-120524561                          | NM_023755:17             | Tefcp211      | INSIDE                 | 1.132                                                        | 2.165                          | 479.23             | 1037.66            | 2.452                          | 440.91             | 1081.05            |
| A_68_P27355937 | chr10:93297003-93297047                           | NM_183199:2725           | Usp44         | INSIDE                 | 1.132                                                        | 1.866                          | 1594.73            | 2975.74            | 2.112                          | 1420.31            | 2999.49            |
| A_68_P26350324 | chr9:21875178-21875222                            | NM_177318:589            | Zfp653        | INSIDE                 | 1.132                                                        | 2.191                          | 1484.34            | 3252.24            | 2.480                          | 1254.36            | 3110.43            |
| A_68_P27243854 | chr10:72562038-72562082                           | ENSMUST00000123398:-29   |               | PROMOTER               | 1.132                                                        | 1.546                          | 813.55             | 1257.52            | 1.750                          | 691.43             | 1209.73            |
| A_68_P30980681 | chr16:94535120-94535164                           | ENSMUST00000163193:28    |               | INSIDE                 | 1.132                                                        | 2.204                          | 421.03             | 927.89             | 2.495                          | 443.79             | 1107.48            |
| A_68_P25956922 | chr8:73987506-73987550                            | NM_022419:28             | Abhd8         | INSIDE                 | 1.131                                                        | 2.020                          | 1162.52            | 2348.78            | 2.286                          | 989.73             | 2262.10            |
| A_68_P31792809 | chr18:67770642-67770686                           | NM_001081073:30326       | Cep76         | DOWNSTREAM             | 1.131                                                        | 2.718                          | 912.10             | 2478.85            | 3.075                          | 868.89             | 2671.83            |
| A_68_P21144177 | chr2:37648771-37648815                            | NM_001163566:17024       | Crb2          | INSIDE                 | 1.131                                                        | 1.884                          | 942.70             | 1775.59            | 2.130                          | 797.93             | 1699.64            |
| A_68_P22478235 | chr3:121426699-121426743                          | NM_010171:266            | F3            | INSIDE                 | 1.131                                                        | 3.407                          | 867.23             | 2954.66            | 3.854                          | 775.43             | 2988.73            |
| A_68_P31769419 | chr18:63546533-63546577                           | NM_001039485:283         | Fam38b        | INSIDE                 | 1.131                                                        | 1.997                          | 581.71             | 1161.72            | 2.258                          | 567.09             | 1280.64            |
| A_68_P24084077 | chr5:129107075-129107119                          | NM_175284:116            | Fzd10         | INSIDE                 | 1.131                                                        | 1.604                          | 2129.45            | 3415.30            | 1.815                          | 1811.96            | 3288.13            |
| A_68_P25101369 | chr7:54051464-54051508                            | NM_008186:23             | Gtf2h1        | INSIDE                 | 1.131                                                        | 1.661                          | 936.05             | 1554.75            | 1.879                          | 896.20             | 1683.89            |
| A_68_P20735838 | chr1:156946384-156946428                          | NM_010500:360            | Ier5          | INSIDE                 | 1.131                                                        | 2.201                          | 1244.46            | 2738.95            | 2.490                          | 1188.58            | 2959.83            |
| A_68_P24990860 | chr7:19590227-19590271                            | NM_178757:835            | Irf2bp1       | INSIDE                 | 1.131                                                        | 1.763                          | 1837.61            | 3238.94            | 1.993                          | 1762.95            | 3514.40            |
| A_68_P25048200 | chr7:35989129-35989173                            | NM_001024707:11214       | Lrp3          | INSIDE                 | 1.131                                                        | 2.902                          | 1181.12            | 3427.53            | 3.281                          | 1136.90            | 3730.09            |
| A_68_P31950785 | chr19:10531094-10531138                           | NM_001111140:821         | Lrrc10b       | INSIDE                 | 1.131                                                        | 2.153                          | 1053.08            | 2267.75            | 2.435                          | 839.23             | 2043.34            |
| A_68_P31123769 | chr7:28828900-28828944                            | NM_001168513:-590        | Mapk14        | PROMOTER               | 1.131                                                        | 0.473                          | 1171.18            | 553.93             | 0.535                          | 945.80             | 505.85             |
| A_68_P23912413 | chr5:97821466-97821510                            | NM_001033191:-139        | Naa11         | PROMOTER               | 1.131                                                        | 3.127                          | 490.68             | 1534.16            | 3.537                          | 462.38             | 1635.47            |
| A_68_P27938850 | chr11:77500718-77500762                           | NM_001024205:1100        | Nufip2        | INSIDE                 | 1.131                                                        | 1.901                          | 799.40             | 1519.34            | 2.149                          | 761.15             | 1635.71            |
| A_68_P20506805 | chr1:108068539-108068583                          | NM_133821:115            | Phlpp1        | INSIDE                 | 1.131                                                        | 1.759                          | 960.77             | 1689.57            | 1.989                          | 957.95             | 1905.39            |
| A_68_P29614457 | chr14:55433063-55433107                           | ENSMUST00000095853:-2239 |               | PROMOTER               | 1.131                                                        | 3.954                          | 388.67             | 1536.94            | 4.472                          | 346.70             | 1550.30            |
| A_68_P23964211 | chr5:107393205-107393249                          | NM_009863:-114           | Cdc7          | PROMOTER               | 1.130                                                        | 0.493                          | 1524.97            | 751.29             | 0.557                          | 1224.76            | 681.98             |
| A_68_P30978325 | chr16:93919893-93919937                           | NM_001165925:9898        | Cldn14        | INSIDE                 | 1.130                                                        | 2.372                          | 949.97             | 2253.51            | 2.680                          | 775.30             | 2077.44            |
| A_68_P23335797 | chr4:136327232-136327276                          | NM_010142:64596          | Ephb2         | INSIDE                 | 1.130                                                        | 2.063                          | 874.58             | 1804.27            | 2.330                          | 651.95             | 1519.16            |
| A_68_P20802634 | chr1:168931803-168931847                          | NM_001160261:277         | Fam78b        | INSIDE                 | 1.130                                                        | 0.316                          | 1915.80            | 605.47             | 0.357                          | 1718.61            | 613.93             |

| ProbeName      | Target position of probe on CpG island microarray | TargetID              | GeneSymbol    | CpG island Description | Ratio of relative methylation (TiO <sub>2</sub> -NP/Vehicle) | Sham group                     |                    |                    | TiO <sub>2</sub> -H group      |                    |                    |
|----------------|---------------------------------------------------|-----------------------|---------------|------------------------|--------------------------------------------------------------|--------------------------------|--------------------|--------------------|--------------------------------|--------------------|--------------------|
|                |                                                   |                       |               |                        |                                                              | Relative methylation (Cy5/Cy3) | Cy3 signal (Input) | Cy5 signal (MeDIP) | Relative methylation (Cy5/Cy3) | Cy3 signal (Input) | Cy5 signal (MeDIP) |
| A_68_P28252842 | chr12:14156956-14157000                           | NM_029007:1866        | Fam84a        | INSIDE                 | 1.130                                                        | 2.618                          | 555.34             | 1453.73            | 2.959                          | 554.02             | 1639.09            |
| A_68_P24023710 | chr5:118426893-118426937                          | NM_145564:136         | Fbxo21        | INSIDE                 | 1.130                                                        | 3.068                          | 500.83             | 1536.34            | 3.465                          | 508.89             | 1763.37            |
| A_68_P20659571 | chr1:140740389-140740433                          | NM_001025565-1389     | Lhx9          | PROMOTER               | 1.130                                                        | 1.831                          | 1299.75            | 2379.48            | 2.069                          | 1055.41            | 2183.13            |
| A_68_P30397301 | chr15:84685820-84685864                           | NM_001081166:717      | Phf21b        | INSIDE                 | 1.130                                                        | 3.178                          | 1138.98            | 3619.84            | 3.592                          | 842.94             | 3028.01            |
| A_68_P25988741 | chr8:80959478-80959522                            | NM_138944:1051        | Pou4f2        | INSIDE                 | 1.130                                                        | 3.656                          | 4305.55            | 15740.83           | 4.132                          | 3111.38            | 12857.22           |
| A_68_P28768141 | chr12:117724105-117724149                         | NM_011215:-66         | Ptpn2         | PROMOTER               | 1.130                                                        | 1.583                          | 1074.15            | 1700.39            | 1.789                          | 1006.04            | 1800.06            |
| A_68_P24995080 | chr7:20334701-20334745                            | NM_008990:200         | Pvrl2         | INSIDE                 | 1.130                                                        | 1.346                          | 2087.53            | 2810.35            | 1.522                          | 1636.76            | 2490.75            |
| A_68_P30602965 | chr16:23431568-23431612                           | NM_001004151:2385     | Rtp1          | INSIDE                 | 1.130                                                        | 2.379                          | 1365.49            | 3247.93            | 2.689                          | 1055.37            | 2837.82            |
| A_68_P32464062 | chrX:70918709-70918753                            | NM_001142809:259      | Stc6a8        | INSIDE                 | 1.130                                                        | 2.245                          | 1005.50            | 2257.49            | 2.538                          | 600.47             | 1523.78            |
| A_68_P24946871 | chr7:3646125-3646169                              | NM_024168:37          | Tsen34        | INSIDE                 | 1.130                                                        | 1.826                          | 930.72             | 1699.85            | 2.064                          | 796.80             | 1644.50            |
| A_68_P29052703 | chr13:55097861-55097905                           | NM_153131:47090       | Unc5a         | INSIDE                 | 1.130                                                        | 1.820                          | 850.05             | 1547.27            | 2.057                          | 709.55             | 1459.72            |
| A_68_P27287691 | chr10:80607646-80607690                           | NM_010731:8653        | Zbtb7a        | INSIDE                 | 1.130                                                        | 2.238                          | 891.42             | 1995.35            | 2.530                          | 738.06             | 1866.95            |
| A_68_P23246906 | chr4:119406428-119406472                          | ENSMUST00000123698:5  |               | INSIDE                 | 1.130                                                        | 1.603                          | 645.40             | 1034.34            | 1.811                          | 645.94             | 1169.68            |
| A_68_P20140407 | chr1:34807751-34807795                            | ENSMUST00000159021:47 |               | INSIDE                 | 1.130                                                        | 1.687                          | 1158.01            | 1953.28            | 1.907                          | 1050.77            | 2003.67            |
| A_68_P22831248 | chr4:34498476-34498520                            | NM_001007589:635      | Akirin2       | INSIDE                 | 1.129                                                        | 1.711                          | 696.00             | 1190.84            | 1.932                          | 724.90             | 1400.82            |
| A_68_P28118513 | chr11:109287169-109287213                         | NM_025275:-69         | Amz2          | PROMOTER               | 1.129                                                        | 3.757                          | 13200.16           | 49595.05           | 4.243                          | 9103.96            | 38625.81           |
| A_68_P30379101 | chr15:81524789-81524833                           | NM_001164320:2907     | Chadl         | INSIDE                 | 1.129                                                        | 2.269                          | 506.69             | 1149.46            | 2.561                          | 510.76             | 1308.12            |
| A_68_P23048394 | chr4:80557447-80557491                            | NM_026821:879         | D4Bwg0951c    | INSIDE                 | 1.129                                                        | 1.531                          | 1289.37            | 1974.09            | 1.729                          | 1187.68            | 2053.84            |
| A_68_P32571131 | chrX:100129101-100129145                          | NR_026596:440         | Gm5126        | INSIDE                 | 1.129                                                        | 1.972                          | 1117.42            | 2203.20            | 2.226                          | 614.16             | 1367.03            |
| A_68_P29616399 | chr14:55732726-55732770                           | NM_177049:3024        | Jph4          | INSIDE                 | 1.129                                                        | 2.261                          | 824.86             | 1865.14            | 2.552                          | 722.05             | 1842.75            |
| A_68_P23540978 | chr5:23830927-23830971                            | NM_013569:26474       | Kenh2         | INSIDE                 | 1.129                                                        | 2.988                          | 2107.06            | 6296.46            | 3.375                          | 1674.04            | 5649.80            |
| A_68_P27812422 | chr11:54673996-54674040                           | NM_029327:75          | Lymr7         | INSIDE                 | 1.129                                                        | 1.429                          | 3304.07            | 4720.10            | 1.613                          | 2508.60            | 4045.64            |
| A_68_P23760677 | chr5:66651381-66651425                            | NM_027602:39          | Nsun7         | INSIDE                 | 1.129                                                        | 2.403                          | 1435.65            | 3449.80            | 2.713                          | 1227.49            | 3329.77            |
| A_68_P25046335 | chr7:35697613-35697657                            | NM_008820:209         | Pepd          | INSIDE                 | 1.129                                                        | 1.376                          | 1225.76            | 1686.86            | 1.554                          | 1149.70            | 1786.12            |
| A_68_P30421717 | chr15:88692777-88692821                           | NM_145478:175         | Pim3          | INSIDE                 | 1.129                                                        | 1.394                          | 1000.10            | 1393.68            | 1.574                          | 916.11             | 1441.65            |
| A_68_P31255958 | chr17:56556525-56556570                           | NM_011218:59356       | Ptprs         | INSIDE                 | 1.129                                                        | 4.864                          | 4355.83            | 21185.90           | 5.492                          | 2882.79            | 15830.97           |
| A_68_P26750957 | chr9:97011068-97011112                            | NM_138756:370         | Stc25a36      | INSIDE                 | 1.129                                                        | 2.684                          | 511.45             | 1372.60            | 3.031                          | 488.22             | 1479.94            |
| A_68_P31320416 | chr17:69191045-69191089                           | NM_001206661:4591     | Tmem200c      | INSIDE                 | 1.129                                                        | 2.166                          | 601.76             | 1303.63            | 2.446                          | 534.97             | 1308.47            |
| A_68_P21578172 | chr2:120803100-120803144                          | NM_175285:325         | Tmem62        | INSIDE                 | 1.129                                                        | 1.454                          | 1105.95            | 1608.00            | 1.642                          | 921.30             | 1512.60            |
| A_68_P27033726 | chr10:28916932-28916976                           | NM_026138:53153       | 6330407J23Rik | INSIDE                 | 1.128                                                        | 1.859                          | 748.58             | 1391.81            | 2.098                          | 668.17             | 1401.64            |
| A_68_P27261497 | chr10:75807668-75807712                           | NM_001081419:317      | Dip2a         | INSIDE                 | 1.128                                                        | 3.131                          | 272.03             | 851.86             | 3.531                          | 272.92             | 963.72             |
| A_68_P24114557 | chr5:135540470-135540514                          | NM_025362:417         | Dnajc30       | INSIDE                 | 1.128                                                        | 2.133                          | 1776.01            | 3788.39            | 2.406                          | 1434.69            | 3452.13            |
| A_68_P26426831 | chr9:36604670-36604714                            | NM_007915:-39         | Ei24          | PROMOTER               | 1.128                                                        | 1.592                          | 1012.32            | 1611.88            | 1.796                          | 922.58             | 1657.33            |
| A_68_P27325079 | chr10:87842398-87842442                           | NM_001004164:264      | Gnptab        | INSIDE                 | 1.128                                                        | 1.342                          | 2931.35            | 3934.67            | 1.514                          | 2436.78            | 3689.79            |
| A_68_P30349001 | chr15:76369402-76369446                           | NM_029643:52          | Gpr172b       | INSIDE                 | 1.128                                                        | 1.357                          | 6927.26            | 9402.20            | 1.531                          | 4481.62            | 6861.63            |
| A_68_P29531951 | chr14:35632882-35632926                           | NM_008166:-417        | Grid1         | PROMOTER               | 1.128                                                        | 1.842                          | 492.01             | 906.46             | 2.077                          | 427.17             | 887.38             |
| A_68_P30659189 | chr16:33684918-33684962                           | NM_175256:389         | Heg1          | INSIDE                 | 1.128                                                        | 2.272                          | 528.67             | 1201.19            | 2.562                          | 558.98             | 1432.02            |
| A_68_P25952861 | chr8:73118130-73118174                            | NM_023627:-227        | Isyna1        | PROMOTER               | 1.128                                                        | 2.026                          | 3018.72            | 6117.16            | 2.286                          | 2862.07            | 6543.52            |
| A_68_P26164569 | chr8:113262564-113262608                          | NM_198625:17203       | Mtss1l        | INSIDE                 | 1.128                                                        | 2.465                          | 381.11             | 939.34             | 2.780                          | 287.14             | 798.36             |
| A_68_P31334901 | chr17:71876213-71876257                           | NM_023294:-37         | Ndc80         | PROMOTER               | 1.128                                                        | 2.978                          | 1733.43            | 5161.62            | 3.359                          | 1504.81            | 5054.96            |
| A_68_P27095769 | chr10:42311289-42311333                           | NM_152229:-7916       | Nr2e1         | PROMOTER               | 1.128                                                        | 2.252                          | 814.51             | 1833.99            | 2.540                          | 721.19             | 1832.09            |
| A_68_P30346946 | chr15:76059550-76059594                           | NM_201385:355         | Plec          | INSIDE                 | 1.128                                                        | 1.776                          | 652.58             | 1158.87            | 2.004                          | 605.70             | 1213.76            |
| A_68_P29507012 | chr14:31439384-31439428                           | NM_011103:-12         | Prkcd         | PROMOTER               | 1.128                                                        | 1.764                          | 1693.98            | 2988.38            | 1.991                          | 1341.56            | 2670.65            |
| A_68_P27680407 | chr11:30671725-30671769                           | NM_134013:-28         | Psmc4         | PROMOTER               | 1.128                                                        | 3.983                          | 557.55             | 2220.92            | 4.491                          | 488.03             | 2191.96            |
| A_68_P30964118 | chr16:91647937-91647981                           | NM_019973:-110        | Son           | DIVERGENT_PROMOTER     | 1.128                                                        | 1.459                          | 719.73             | 1049.93            | 1.646                          | 583.50             | 960.53             |
| A_68_P24136155 | chr5:140020104-140020148                          | NM_013702:275         | Unex          | INSIDE                 | 1.128                                                        | 2.398                          | 418.23             | 1002.95            | 2.705                          | 376.69             | 1019.00            |
| A_68_P22682765 | chr3:157610022-157610066                          | NM_001013806:-385     | Ankrd13c      | PROMOTER               | 1.127                                                        | 2.003                          | 281.45             | 563.66             | 2.258                          | 262.83             | 593.44             |
| A_68_P27383822 | chr10:98377388-98377432                           | NM_026482:-375        | Atp2b1        | PROMOTER               | 1.127                                                        | 1.958                          | 1082.85            | 2120.25            | 2.206                          | 1071.78            | 2364.26            |
| A_68_P23262157 | chr4:123019781-123019825                          | NM_007558:244         | Bmp8a         | INSIDE                 | 1.127                                                        | 1.526                          | 2048.80            | 3126.73            | 1.721                          | 1635.69            | 2814.47            |
| A_68_P25601079 | chr7:150645980-150646024                          | NM_001161624:953      | Cdkn1c        | INSIDE                 | 1.127                                                        | 2.138                          | 1118.53            | 2391.11            | 2.410                          | 926.98             | 2233.96            |
| A_68_P25416676 | chr7:118172200-118172244                          | NM_009431:-242        | Ctr9          | PROMOTER               | 1.127                                                        | 2.911                          | 2509.27            | 7304.92            | 3.281                          | 1987.88            | 6521.38            |

| ProbeName      | Target position of probe on CpG island microarray | TargetID           | GeneSymbol  | CpG island Description | Ratio of relative methylation (TiO <sub>2</sub> -NP/Vehicle) | Sham group                     |                    |                    | TiO <sub>2</sub> -H group      |                    |                    |
|----------------|---------------------------------------------------|--------------------|-------------|------------------------|--------------------------------------------------------------|--------------------------------|--------------------|--------------------|--------------------------------|--------------------|--------------------|
|                |                                                   |                    |             |                        |                                                              | Relative methylation (Cy5/Cy3) | Cy3 signal (Input) | Cy5 signal (MeDIP) | Relative methylation (Cy5/Cy3) | Cy3 signal (Input) | Cy5 signal (MeDIP) |
| A_68_P26702587 | chr9:86916837-86916881                            | NM_024195:-5       | Cyb5r4      | PROMOTER               | 1.127                                                        | 1.823                          | 754.56             | 1375.67            | 2.056                          | 720.12             | 1480.25            |
| A_68_P32121690 | chr19:42593224-42593268                           | NM_177464:-48      | D19Ert4386c | PROMOTER               | 1.127                                                        | 1.817                          | 1137.00            | 2065.65            | 2.048                          | 1086.35            | 2224.81            |
| A_68_P25804901 | chr8:41393403-41393447                            | NM_030110:20       | Etha2       | INSIDE                 | 1.127                                                        | 2.683                          | 495.32             | 1329.13            | 3.025                          | 443.06             | 1340.16            |
| A_68_P21978661 | chr3:20055140-20055184                            | NM_013755:-167     | Gyg         | PROMOTER               | 1.127                                                        | 1.955                          | 1641.92            | 3209.14            | 2.202                          | 1347.68            | 2967.28            |
| A_68_P24874508 | chr6:136756818-136756862                          | NM_177688:72       | H2afj       | INSIDE                 | 1.127                                                        | 1.433                          | 1278.02            | 1831.51            | 1.615                          | 1066.15            | 1721.33            |
| A_68_P32317010 | chrX:33652351-33652395                            | NM_133990:239      | Il13ra1     | INSIDE                 | 1.127                                                        | 1.899                          | 4506.61            | 8558.69            | 2.140                          | 2304.04            | 4930.72            |
| A_68_P29629465 | chr14:58318680-58318724                           | NM_015771:46258    | Lats2       | INSIDE                 | 1.127                                                        | 2.930                          | 504.95             | 1479.46            | 3.301                          | 495.60             | 1636.15            |
| A_68_P22530171 | chr3:130814691-130814735                          | NM_010703:1324     | Lef1        | INSIDE                 | 1.127                                                        | 1.429                          | 2297.82            | 3284.60            | 1.610                          | 1885.12            | 3035.82            |
| A_68_P24947963 | chr7:4098615-4098659                              | NM_172736:9979     | Leng8       | INSIDE                 | 1.127                                                        | 1.830                          | 439.99             | 805.26             | 2.063                          | 385.96             | 796.09             |
| A_68_P25962049 | chr8:75072127-75072171                            | NM_027485:61       | Med26       | INSIDE                 | 1.127                                                        | 1.502                          | 3907.00            | 5867.53            | 1.693                          | 3200.25            | 5416.89            |
| A_68_P21117012 | chr2:32568363-32568407                            | NR_037217:24       | Mir2861     | INSIDE                 | 1.127                                                        | 3.167                          | 835.73             | 2647.07            | 3.571                          | 799.84             | 2856.20            |
| A_68_P30489319 | chr15:100883076-100883120                         | NM_011323:116397   | Scn8a       | DOWNSTREAM             | 1.127                                                        | 2.092                          | 1309.64            | 2740.06            | 2.358                          | 1253.14            | 2955.06            |
| A_68_P23330839 | chr4:135411815-135411861                          | NM_001080387:-168  | Srsf10      | PROMOTER               | 1.127                                                        | 1.682                          | 3204.38            | 5389.99            | 1.896                          | 2995.58            | 5681.04            |
| A_68_P23012916 | chr4:71861284-71861328                            | NM_011599:647      | Tle1        | INSIDE                 | 1.127                                                        | 2.671                          | 1196.33            | 3194.96            | 3.009                          | 952.46             | 2866.07            |
| A_68_P25507829 | chr7:135020578-135020622                          | NM_146259:-263     | Zfp668      | DIVERGENT_PROMOTER     | 1.127                                                        | 2.046                          | 823.32             | 1684.78            | 2.307                          | 742.75             | 1713.48            |
| A_68_P28724524 | chr12:109155065-109155109                         | NM_001079883:86538 | Bell1b      | INSIDE                 | 1.126                                                        | 2.863                          | 1903.33            | 5449.60            | 3.223                          | 1611.25            | 5192.94            |
| A_68_P27170202 | chr10:59165196-59165240                           | NM_144822:-164     | Cbara1      | PROMOTER               | 1.126                                                        | 2.006                          | 4977.36            | 9985.92            | 2.258                          | 3719.38            | 8399.22            |
| A_68_P30398340 | chr15:84867516-84867560                           | NM_177067:47       | Fam118a     | INSIDE                 | 1.126                                                        | 2.443                          | 1611.58            | 3937.51            | 2.752                          | 1407.99            | 3874.08            |
| A_68_P21903071 | chr2:180069548-180069594                          | NM_008093:-186     | Gata5       | PROMOTER               | 1.126                                                        | 1.623                          | 1135.94            | 1843.92            | 1.827                          | 976.85             | 1785.10            |
| A_68_P26803568 | chr9:106367195-106367239                          | NM_001159652:1055  | Gpr62       | INSIDE                 | 1.126                                                        | 1.666                          | 386.43             | 643.71             | 1.875                          | 384.51             | 720.93             |
| A_68_P23609898 | chr5:37221813-37221857                            | NM_008550:54       | Man2b2      | INSIDE                 | 1.126                                                        | 2.762                          | 327.00             | 903.21             | 3.110                          | 277.74             | 863.68             |
| A_68_P23165465 | chr4:102986727-102986771                          | NM_025909:298      | Oma1        | INSIDE                 | 1.126                                                        | 5.112                          | 1188.71            | 6077.25            | 5.755                          | 1120.92            | 6450.42            |
| A_68_P27898397 | chr11:69810791-69810835                           | NM_030064:1540     | Phf23       | INSIDE                 | 1.126                                                        | 2.066                          | 7259.79            | 15002.29           | 2.327                          | 5141.65            | 11964.06           |
| A_68_P26463563 | chr9:43552020-43552064                            | NM_021424:-616     | Pvr11       | PROMOTER               | 1.126                                                        | 2.202                          | 1633.90            | 3597.46            | 2.479                          | 1477.24            | 3661.51            |
| A_68_P29043022 | chr13:53381392-53381436                           | NM_013846:64       | Ror2        | INSIDE                 | 1.126                                                        | 3.425                          | 617.86             | 2116.16            | 3.856                          | 536.08             | 2067.12            |
| A_68_P27138496 | chr10:52410751-52410795                           | NM_178675:466      | Slc35f1     | INSIDE                 | 1.126                                                        | 1.990                          | 1572.59            | 3130.09            | 2.241                          | 1336.97            | 2995.73            |
| A_68_P31092361 | chr17:23694750-23694794                           | NM_001033496:6421  | Zfp213      | INSIDE                 | 1.126                                                        | 1.829                          | 798.17             | 1460.02            | 2.059                          | 675.76             | 1391.72            |
| A_68_P26721513 | chr9:91260697-91260741                            | NM_009573:-81      | Zic1        | DIVERGENT_PROMOTER     | 1.126                                                        | 1.830                          | 844.72             | 1545.93            | 2.060                          | 792.22             | 1631.95            |
| A_68_P26397765 | chr9:30750581-30750625                            | NM_013906:455      | Adams8      | INSIDE                 | 1.125                                                        | 2.011                          | 278.48             | 559.91             | 2.263                          | 326.96             | 739.84             |
| A_68_P20415724 | chr1:88995295-88995339                            | NM_001081082:2865  | Alpi        | INSIDE                 | 1.125                                                        | 2.535                          | 1740.25            | 4411.02            | 2.851                          | 1512.82            | 4312.72            |
| A_68_P31126995 | chr17:29405863-29405907                           | NM_030561:152      | BC004004    | INSIDE                 | 1.125                                                        | 4.399                          | 837.45             | 3684.17            | 4.947                          | 928.52             | 4593.58            |
| A_68_P30577277 | chr16:18066405-18066449                           | NM_010047:13474    | Dger6       | INSIDE                 | 1.125                                                        | 2.111                          | 622.10             | 1313.52            | 2.375                          | 589.46             | 1399.75            |
| A_68_P26467018 | chr9:44134953-44134997                            | NM_007875:47       | Dpagt1      | INSIDE                 | 1.125                                                        | 1.704                          | 1665.61            | 2838.60            | 1.917                          | 1318.30            | 2527.30            |
| A_68_P22143243 | chr3:53461165-53461209                            | NM_172862:91       | Frem2       | INSIDE                 | 1.125                                                        | 0.561                          | 1229.20            | 689.04             | 0.631                          | 1013.81            | 639.35             |
| A_68_P29919651 | chr14:115491767-115491811                         | NM_175500:352      | Gpc5        | INSIDE                 | 1.125                                                        | 1.438                          | 1690.74            | 2430.92            | 1.618                          | 1455.25            | 2354.06            |
| A_68_P29363818 | chr13:118391526-118391570                         | NM_010408:422      | Hcn1        | INSIDE                 | 1.125                                                        | 1.481                          | 1062.38            | 1572.93            | 1.666                          | 931.13             | 1551.41            |
| A_68_P28041908 | chr11:95866113-95866157                           | NM_009951:1124     | Igf2bp1     | INSIDE                 | 1.125                                                        | 1.694                          | 717.37             | 1215.34            | 1.906                          | 660.05             | 1258.22            |
| A_68_P26348939 | chr9:21599872-21599916                            | NM_145611:3096     | Kank2       | INSIDE                 | 1.125                                                        | 3.439                          | 382.15             | 1314.14            | 3.868                          | 340.80             | 1318.37            |
| A_68_P29330802 | chr13:112598180-112598224                         | NM_011945:989      | Map3k1      | INSIDE                 | 1.125                                                        | 1.958                          | 1148.76            | 2249.64            | 2.204                          | 1021.70            | 2251.52            |
| A_68_P22171318 | chr3:58810124-58810168                            | NM_177855:-753     | Med12l      | PROMOTER               | 1.125                                                        | 4.283                          | 1021.22            | 4374.12            | 4.820                          | 881.59             | 4249.61            |
| A_68_P29020016 | chr13:48641931-48641975                           | NR_029725:-8311    | Mirlet7a-1  | PROMOTER               | 1.125                                                        | 0.466                          | 1396.43            | 651.43             | 0.525                          | 1184.86            | 621.63             |
| A_68_P31478451 | chr18:7626517-7626561                             | NM_001081287:323   | Mpp7        | INSIDE                 | 1.125                                                        | 1.504                          | 2215.94            | 3333.11            | 1.693                          | 1868.73            | 3163.29            |
| A_68_P30506992 | chr16:3884518-3884562                             | NM_029090:-78      | Nat15       | PROMOTER               | 1.125                                                        | 2.018                          | 1018.83            | 2056.29            | 2.271                          | 959.87             | 2180.16            |
| A_68_P21096075 | chr2:29107688-29107733                            | NM_133500:-4150    | Ntng2       | PROMOTER               | 1.125                                                        | 1.354                          | 3110.70            | 4212.44            | 1.523                          | 2243.73            | 3417.78            |
| A_68_P30392999 | chr15:83998465-83998509                           | NM_054088:241      | Pnpla3      | INSIDE                 | 1.125                                                        | 1.500                          | 1090.90            | 1636.51            | 1.688                          | 843.21             | 1423.21            |
| A_68_P24010226 | chr5:116009731-116009775                          | NM_007475:277      | Rplp0       | INSIDE                 | 1.125                                                        | 1.643                          | 987.19             | 1622.35            | 1.849                          | 821.63             | 1518.89            |
| A_68_P30345849 | chr15:75899507-75899551                           | NM_134089:632      | Scrib       | INSIDE                 | 1.125                                                        | 1.881                          | 480.74             | 904.32             | 2.117                          | 420.75             | 890.66             |
| A_68_P30572143 | chr16:17131714-17131758                           | NM_022324:740      | Sdf2l1      | INSIDE                 | 1.125                                                        | 2.034                          | 1252.01            | 2546.19            | 2.288                          | 964.51             | 2207.23            |
| A_68_P31253057 | chr17:56110074-56110118                           | NM_001159523:192   | Shd         | INSIDE                 | 1.125                                                        | 1.748                          | 842.82             | 1472.92            | 1.967                          | 711.24             | 1398.88            |
| A_68_P22049386 | chr3:34548677-34548721                            | NM_011443:-228     | Sox2        | PROMOTER               | 1.125                                                        | 1.999                          | 2345.89            | 4690.46            | 2.249                          | 1956.16            | 4399.36            |
| A_68_P28137857 | chr11:112646792-112646839                         | NM_011448:3292     | Sox9        | INSIDE                 | 1.125                                                        | 1.925                          | 389.88             | 750.50             | 2.165                          | 311.62             | 674.72             |

| ProbeName      | Target position of probe on CpG island microarray | TargetID                 | GeneSymbol    | CpG island Description | Ratio of relative methylation (TiO <sub>2</sub> -NP/Vehicle) | Sham group                     |                    |                    | TiO <sub>2</sub> -H group      |                    |                    |
|----------------|---------------------------------------------------|--------------------------|---------------|------------------------|--------------------------------------------------------------|--------------------------------|--------------------|--------------------|--------------------------------|--------------------|--------------------|
|                |                                                   |                          |               |                        |                                                              | Relative methylation (Cy5/Cy3) | Cy3 signal (Input) | Cy5 signal (MeDIP) | Relative methylation (Cy5/Cy3) | Cy3 signal (Input) | Cy5 signal (MeDIP) |
| A_68_P21328888 | chr2:72818835-72818879                            | NM_001018042:-353        | Sp3           | PROMOTER               | 1.125                                                        | 1.616                          | 663.56             | 1072.08            | 1.818                          | 670.89             | 1219.78            |
| A_68_P27316753 | chr10:86371829-86371873                           | NM_138673:98837          | Stab2         | INSIDE                 | 1.125                                                        | 3.402                          | 3564.78            | 12127.28           | 3.827                          | 2463.71            | 9429.19            |
| A_68_P29619289 | chr14:56300469-56300513                           | NM_145705:164            | Tinf2         | INSIDE                 | 1.125                                                        | 0.541                          | 966.05             | 522.83             | 0.609                          | 872.28             | 531.09             |
| A_68_P23253640 | chr4:120527812-120527856                          | ENSMUST00000106283:-6547 |               | PROMOTER               | 1.125                                                        | 0.498                          | 1439.94            | 716.85             | 0.560                          | 1221.75            | 684.51             |
| A_68_P30753194 | chr16:50732861-50732905                           | NR_028300:4              | 5330426P16Rik | INSIDE                 | 1.124                                                        | 1.619                          | 1755.53            | 2842.94            | 1.821                          | 1473.33            | 2682.76            |
| A_68_P21477087 | chr2:102290962-102291006                          | NM_010218:965            | Fjx1          | INSIDE                 | 1.124                                                        | 1.437                          | 1031.17            | 1481.36            | 1.615                          | 916.58             | 1480.38            |
| A_68_P23404325 | chr4:149475753-149475801                          | NM_177366:14165          | Gpr157        | INSIDE                 | 1.124                                                        | 2.965                          | 880.82             | 2611.72            | 3.334                          | 642.22             | 2140.87            |
| A_68_P31936713 | chr19:7000522-7000566                             | NM_008431:8461           | Kenk4         | INSIDE                 | 1.124                                                        | 1.523                          | 707.45             | 1077.34            | 1.712                          | 615.21             | 1053.30            |
| A_68_P22629212 | chr3:148482607-148482651                          | NM_001081298:134971      | Lphm2         | INSIDE                 | 1.124                                                        | 2.333                          | 916.79             | 2139.02            | 2.622                          | 775.73             | 2034.33            |
| A_68_P29360869 | chr13:117813423-117813467                         | NM_001081009:879         | Parp8         | INSIDE                 | 1.124                                                        | 2.116                          | 964.43             | 2041.21            | 2.380                          | 921.32             | 2192.53            |
| A_68_P21250383 | chr2:58999148-58999192                            | NM_026361:264            | Pkp4          | INSIDE                 | 1.124                                                        | 2.186                          | 862.41             | 1885.42            | 2.458                          | 739.05             | 1816.46            |
| A_68_P23236665 | chr4:117508655-117508699                          | NM_008135:814            | Sle6a9        | INSIDE                 | 1.124                                                        | 1.965                          | 2599.01            | 5107.11            | 2.208                          | 1728.01            | 3815.76            |
| A_68_P20002770 | chr1:3661760-3661804                              | NM_001011874:-203        | Xkr4          | PROMOTER               | 1.124                                                        | 2.102                          | 577.43             | 1214.00            | 2.363                          | 544.73             | 1286.96            |
| A_68_P20286079 | chr1:63319663-63319707                            | NM_028673:-158           | Zdbf2         | PROMOTER               | 1.124                                                        | 0.562                          | 1637.97            | 921.24             | 0.632                          | 1465.82            | 926.32             |
| A_68_P24155695 | chr5:144016767-144016811                          | NM_017467:14913          | Zfp316        | INSIDE                 | 1.124                                                        | 2.209                          | 2534.23            | 5598.63            | 2.483                          | 2186.21            | 5428.60            |
| A_68_P21844246 | chr2:168760814-168760858                          | NM_009564:20251          | Zfp64         | INSIDE                 | 1.124                                                        | 3.814                          | 2479.37            | 9455.26            | 4.287                          | 2093.05            | 8972.35            |
| A_68_P22360098 | chr3:98232509-98232553                            | NM_172863:46127          | Zfp697        | INSIDE                 | 1.124                                                        | 2.797                          | 707.86             | 1980.00            | 3.144                          | 553.85             | 1741.06            |
| A_68_P27835192 | chr11:58977171-58977215                           | NM_173785:52             | A230051G13Rik | INSIDE                 | 1.123                                                        | 1.786                          | 433.89             | 775.06             | 2.005                          | 412.37             | 826.87             |
| A_68_P31016357 | chr17:5342164-5342208                             | NM_001085355:347113      | Arid1b        | INSIDE                 | 1.123                                                        | 2.644                          | 663.18             | 1753.23            | 2.969                          | 479.02             | 1422.15            |
| A_68_P23244382 | chr4:118905317-118905361                          | NM_001012400:-9          | AU022252      | DIVERGENT_PROMOTER     | 1.123                                                        | 1.442                          | 1404.68            | 2026.13            | 1.620                          | 1063.93            | 1723.14            |
| A_68_P25952217 | chr8:73018186-73018230                            | NM_018827:1154           | Crf1          | INSIDE                 | 1.123                                                        | 1.798                          | 5505.74            | 9900.80            | 2.020                          | 4030.02            | 8140.75            |
| A_68_P25416832 | chr7:118198930-118198974                          | NM_009431:26488          | Ctr9          | INSIDE                 | 1.123                                                        | 2.798                          | 260.89             | 730.04             | 3.142                          | 239.10             | 751.26             |
| A_68_P31329272 | chr17:70865492-70865536                           | NM_001128180:-5935       | Dlgap1        | PROMOTER               | 1.123                                                        | 2.935                          | 1908.73            | 5602.06            | 3.295                          | 1435.61            | 4730.44            |
| A_68_P30087404 | chr15:26473244-26473288                           | NM_176959:352053         | Fbx17         | INSIDE                 | 1.123                                                        | 1.753                          | 538.92             | 944.86             | 1.969                          | 483.75             | 952.54             |
| A_68_P30367928 | chr15:79521367-79521411                           | NM_013818:63             | Gtbp1         | INSIDE                 | 1.123                                                        | 3.069                          | 635.17             | 1949.07            | 3.446                          | 634.33             | 2185.78            |
| A_68_P31075109 | chr17:17975189-17975234                           | NM_001162909:7273        | Nerna00085    | INSIDE                 | 1.123                                                        | 3.469                          | 605.57             | 2100.56            | 3.894                          | 558.81             | 2176.19            |
| A_68_P30558912 | chr16:13780955-13780999                           | NM_001039521:185         | Rm3           | INSIDE                 | 1.123                                                        | 2.433                          | 258.03             | 627.69             | 2.732                          | 280.10             | 765.35             |
| A_68_P31857887 | chr18:79306987-79307031                           | NM_053099:-878           | Setbp1        | PROMOTER               | 1.123                                                        | 0.497                          | 1281.86            | 636.88             | 0.558                          | 1098.54            | 612.95             |
| A_68_P21911426 | chr2:181316540-181316584                          | NM_026765:116            | Uck1          | INSIDE                 | 1.123                                                        | 2.656                          | 1267.55            | 3367.00            | 2.983                          | 1110.50            | 3312.11            |
| A_68_P32129546 | chr19:44014604-44014648                           | ENSMUST00000122692:7821  |               | DOWNSTREAM             | 1.123                                                        | 1.731                          | 2898.59            | 5017.33            | 1.943                          | 2287.84            | 4445.72            |
| A_68_P21040892 | chr2:18611762-18611806                            | NM_001001334:-8864       | BC061194      | PROMOTER               | 1.122                                                        | 0.519                          | 1628.27            | 844.76             | 0.582                          | 1449.80            | 843.79             |
| A_68_P27278227 | chr10:79144709-79144753                           | NM_177613:-209           | Cdc34         | PROMOTER               | 1.122                                                        | 0.465                          | 1950.56            | 906.64             | 0.522                          | 1612.26            | 840.94             |
| A_68_P31125955 | chr17:29235539-29235583                           | NM_007669:4844           | Cdkn1a        | INSIDE                 | 1.122                                                        | 2.972                          | 502.58             | 1493.77            | 3.336                          | 409.77             | 1366.84            |
| A_68_P28075715 | chr11:101645928-101645972                         | NM_008815:674            | Etv4          | INSIDE                 | 1.122                                                        | 2.141                          | 970.35             | 2077.23            | 2.402                          | 990.51             | 2379.56            |
| A_68_P31876064 | chr18:82575063-82575107                           | NM_008082:1085           | Galr1         | INSIDE                 | 1.122                                                        | 1.995                          | 1520.40            | 3032.62            | 2.238                          | 1261.61            | 2824.04            |
| A_68_P30347942 | chr15:76211135-76211179                           | NM_001162489:-9304       | Heat7a        | PROMOTER               | 1.122                                                        | 1.474                          | 1749.03            | 2578.93            | 1.655                          | 1362.20            | 2254.57            |
| A_68_P28044023 | chr11:96214672-96214716                           | NM_134032:1749           | Hoxb2         | INSIDE                 | 1.122                                                        | 1.727                          | 938.09             | 1620.24            | 1.938                          | 789.67             | 1529.99            |
| A_68_P26674972 | chr9:81525625-81525671                            | NM_010482:511            | Htr1b         | INSIDE                 | 1.122                                                        | 1.738                          | 911.08             | 1583.83            | 1.951                          | 819.14             | 1597.96            |
| A_68_P24479788 | chr6:57652816-57652860                            | NM_133737:390            | Lancel2       | INSIDE                 | 1.122                                                        | 1.545                          | 2724.07            | 4208.06            | 1.734                          | 2402.54            | 4165.97            |
| A_68_P24652024 | chr6:93628341-93628385                            | NM_001083320:235322      | Magi1         | INSIDE                 | 1.122                                                        | 3.051                          | 846.76             | 2583.12            | 3.423                          | 681.07             | 2331.16            |
| A_68_P31779043 | chr18:65243488-65243532                           | NM_031881:60330          | Nedd41        | INSIDE                 | 1.122                                                        | 2.066                          | 1240.90            | 2563.21            | 2.317                          | 1049.16            | 2430.79            |
| A_68_P27709960 | chr11:35821756-35821800                           | NM_011856:935967         | Odz2          | INSIDE                 | 1.122                                                        | 2.553                          | 741.30             | 1892.76            | 2.865                          | 568.48             | 1628.59            |
| A_68_P28168391 | chr11:117848501-117848545                         | NM_133757:352            | Pgs1          | INSIDE                 | 1.122                                                        | 1.519                          | 1115.17            | 1694.49            | 1.706                          | 956.84             | 1632.00            |
| A_68_P29471618 | chr14:25306180-25306224                           | NM_001081247:666         | Polr3a        | INSIDE                 | 1.122                                                        | 1.601                          | 518.23             | 829.50             | 1.795                          | 439.62             | 789.19             |
| A_68_P31407761 | chr17:85357878-85357922                           | NM_001159496:560         | Ppm1b         | INSIDE                 | 1.122                                                        | 4.425                          | 755.98             | 3345.11            | 4.965                          | 671.37             | 3333.25            |
| A_68_P21095251 | chr2:28980877-28980921                            | NM_198033:387            | Setx          | INSIDE                 | 1.122                                                        | 1.525                          | 642.35             | 979.81             | 1.711                          | 537.64             | 919.91             |
| A_68_P29664628 | chr14:64563075-64563120                           | NM_011446:555            | Sox7          | INSIDE                 | 1.122                                                        | 2.820                          | 273.05             | 769.89             | 3.164                          | 232.25             | 734.88             |
| A_68_P30580644 | chr16:18592043-18592087                           | NM_011532:-5002          | Tbx1          | PROMOTER               | 1.122                                                        | 0.571                          | 1145.30            | 653.68             | 0.640                          | 948.06             | 606.86             |
| A_68_P25102684 | chr7:54305881-54305925                            | NM_026436:-107           | Tmem86a       | PROMOTER               | 1.122                                                        | 2.063                          | 564.73             | 1164.84            | 2.315                          | 582.82             | 1349.42            |
| A_68_P24425525 | chr6:47997586-47997630                            | NM_001081382:505         | Zfp777        | INSIDE                 | 1.122                                                        | 1.448                          | 766.77             | 1110.37            | 1.625                          | 685.61             | 1114.02            |
| A_68_P25600984 | chr7:150631945-150631989                          |                          |               | Unknown                | 1.122                                                        | 1.398                          | 1065.69            | 1490.18            | 1.569                          | 1054.23            | 1654.22            |

| ProbeName      | Target position of probe on CpG island microarray | TargetID             | GeneSymbol    | CpG island Description | Ratio of relative methylation (TiO <sub>2</sub> -NP/Vehicle) | Sham group                     |                    |                    | TiO <sub>2</sub> -H group      |                    |                    |
|----------------|---------------------------------------------------|----------------------|---------------|------------------------|--------------------------------------------------------------|--------------------------------|--------------------|--------------------|--------------------------------|--------------------|--------------------|
|                |                                                   |                      |               |                        |                                                              | Relative methylation (Cy5/Cy3) | Cy3 signal (Input) | Cy5 signal (MeDIP) | Relative methylation (Cy5/Cy3) | Cy3 signal (Input) | Cy5 signal (MeDIP) |
| A_68_P24093843 | chr5:130925785-130925831                          | NM_021371:1147       | Caln1         | INSIDE                 | 1.121                                                        | 3.360                          | 181.75             | 610.69             | 3.767                          | 153.56             | 578.45             |
| A_68_P28331591 | chr12:32183927-32183971                           | NM_134048:457        | Cbl11         | INSIDE                 | 1.121                                                        | 1.762                          | 3052.27            | 5376.65            | 1.974                          | 2421.00            | 4780.18            |
| A_68_P23201930 | chr4:109330255-109330299                          | NM_007671:7701       | Cdkn2c        | DOWNSTREAM             | 1.121                                                        | 1.866                          | 1386.97            | 2588.58            | 2.091                          | 1206.84            | 2523.92            |
| A_68_P24994187 | chr7:20172257-20172301                            | NM_016680:17539      | Clasp         | INSIDE                 | 1.121                                                        | 2.314                          | 336.27             | 778.07             | 2.594                          | 293.16             | 760.49             |
| A_68_P26221731 | chr8:123191547-123191591                          | NM_010926:444        | Cox4nb        | INSIDE                 | 1.121                                                        | 1.526                          | 601.10             | 917.29             | 1.711                          | 524.80             | 897.81             |
| A_68_P23190560 | chr4:107107097-107107141                          | NM_147221:-205       | Glis1         | PROMOTER               | 1.121                                                        | 2.399                          | 433.66             | 1040.29            | 2.688                          | 422.84             | 1136.72            |
| A_68_P30580075 | chr16:18498740-18498784                           | NM_001081682:-98     | Gnb11         | PROMOTER               | 1.121                                                        | 4.066                          | 4129.99            | 16792.92           | 4.560                          | 3299.08            | 15042.29           |
| A_68_P27278461 | chr10:79180701-79180746                           | NM_008226:1345       | Hcn2          | INSIDE                 | 1.121                                                        | 3.153                          | 2683.44            | 8461.71            | 3.534                          | 1931.89            | 6826.56            |
| A_68_P32094346 | chr19:37282376-37282420                           | NM_001164337:364     | Marchf5       | INSIDE                 | 1.121                                                        | 2.081                          | 1008.82            | 2099.36            | 2.333                          | 912.38             | 2128.66            |
| A_68_P30422455 | chr15:88813114-88813158                           | NM_031260:-287       | Mov10l1       | DIVERGENT_PROMOTER     | 1.121                                                        | 2.128                          | 2273.16            | 4837.85            | 2.385                          | 1706.98            | 4070.87            |
| A_68_P20961511 | chr2:3201548-3201592                              | NM_008708:11         | Nmt2          | INSIDE                 | 1.121                                                        | 2.092                          | 330.52             | 691.59             | 2.346                          | 364.06             | 854.21             |
| A_68_P20797853 | chr1:167932451-167932495                          | NM_011137:293        | Pou2f1        | INSIDE                 | 1.121                                                        | 1.428                          | 1479.75            | 2112.56            | 1.601                          | 1246.58            | 1995.60            |
| A_68_P31929630 | chr19:5602393-5602437                             | NM_026616:542        | Rnaseh2c      | INSIDE                 | 1.121                                                        | 1.413                          | 4440.56            | 6275.22            | 1.585                          | 3018.56            | 4783.04            |
| A_68_P23896968 | chr5:93371161-93371205                            | NM_001077596:44159   | Shroom3       | INSIDE                 | 1.121                                                        | 2.532                          | 920.68             | 2330.91            | 2.838                          | 816.76             | 2317.61            |
| A_68_P20870658 | chr1:181448224-181448272                          | NM_027188:-114       | Smyd3         | PROMOTER               | 1.121                                                        | 4.340                          | 590.33             | 2562.23            | 4.865                          | 547.57             | 2663.98            |
| A_68_P32246204 | chrX:8849773-8849817                              | NM_023500:-115       | Xk            | PROMOTER               | 1.121                                                        | 3.704                          | 336.44             | 1246.18            | 4.152                          | 218.63             | 907.79             |
| A_68_P21565889 | chr2:118571987-118572031                          | NR_030716:511        | 5430417L22Rik | INSIDE                 | 1.120                                                        | 1.486                          | 610.76             | 907.70             | 1.664                          | 471.16             | 784.02             |
| A_68_P26744297 | chr9:95758279-95758323                            | NM_019864:285        | Atr           | INSIDE                 | 1.120                                                        | 1.587                          | 748.90             | 1188.77            | 1.778                          | 597.84             | 1063.13            |
| A_68_P28752184 | chr12:113977018-113977062                         | NM_001024602:16656   | AW555464      | INSIDE                 | 1.120                                                        | 2.674                          | 1336.86            | 3574.81            | 2.994                          | 1027.27            | 3075.56            |
| A_68_P31382676 | chr17:80772525-80772569                           | NR_028385:336        | Gm10190       | INSIDE                 | 1.120                                                        | 2.192                          | 553.15             | 1212.38            | 2.454                          | 513.84             | 1260.95            |
| A_68_P22954219 | chr4:59048073-59048117                            | NM_025277:67         | Gngl10        | INSIDE                 | 1.120                                                        | 4.538                          | 1394.87            | 6330.21            | 5.085                          | 1370.41            | 6968.52            |
| A_68_P25958331 | chr8:74213094-74213138                            | NM_013564:-34        | Insl3         | PROMOTER               | 1.120                                                        | 1.626                          | 823.07             | 1338.24            | 1.821                          | 701.25             | 1276.68            |
| A_68_P22481651 | chr3:121996059-121996103                          | NR_030439:541        | Mir760        | DOWNSTREAM             | 1.120                                                        | 2.126                          | 448.39             | 953.45             | 2.381                          | 459.44             | 1093.81            |
| A_68_P21742435 | chr2:150864820-150864864                          | NM_026086:273        | Nanp          | INSIDE                 | 1.120                                                        | 1.852                          | 881.80             | 1633.27            | 2.074                          | 781.06             | 1620.22            |
| A_68_P21907359 | chr2:180689094-180689138                          | NM_001141933:288     | Nkain4        | INSIDE                 | 1.120                                                        | 2.360                          | 1131.09            | 2669.47            | 2.644                          | 917.62             | 2426.02            |
| A_68_P27889317 | chr11:68245685-68245729                           | NM_177320:80         | Pik3r5        | INSIDE                 | 1.120                                                        | 1.729                          | 506.43             | 875.69             | 1.936                          | 471.89             | 913.70             |
| A_68_P24059411 | chr5:124571440-124571484                          | NM_011256:94965      | Pitpnm2       | INSIDE                 | 1.120                                                        | 2.346                          | 567.72             | 1331.95            | 2.627                          | 546.52             | 1435.45            |
| A_68_P23365303 | chr4:141219467-141219511                          | NM_001033150:542     | Plekhm2       | INSIDE                 | 1.120                                                        | 1.622                          | 1466.94            | 2378.87            | 1.816                          | 1239.60            | 2251.09            |
| A_68_P32599601 | chrX:108577069-108577113                          | NM_025949:74464      | Rps6ka6       | INSIDE                 | 1.120                                                        | 1.643                          | 1972.86            | 3241.21            | 1.841                          | 1166.85            | 2147.90            |
| A_68_P25026631 | chr7:30117136-30117180                            | NM_001081028:173321  | Sipa1l3       | INSIDE                 | 1.120                                                        | 3.059                          | 2587.23            | 7913.82            | 3.427                          | 1948.58            | 6678.30            |
| A_68_P27214753 | chr10:67374987-67375031                           | NM_178679:402        | Zfp365        | INSIDE                 | 1.120                                                        | 1.797                          | 601.61             | 1081.00            | 2.012                          | 528.76             | 1063.92            |
| A_68_P26202777 | chr8:119960582-119960626                          | NM_028941:87535      | 4933407C03Rik | INSIDE                 | 1.119                                                        | 2.332                          | 584.79             | 1363.68            | 2.610                          | 480.30             | 1253.47            |
| A_68_P20977505 | chr2:6051162-6051206                              | NM_001159657:47      | 5430407P10Rik | INSIDE                 | 1.119                                                        | 2.389                          | 8410.86            | 20096.31           | 2.674                          | 7513.35            | 20090.52           |
| A_68_P20770260 | chr1:163072965-163073010                          | NM_028664:145        | Ankrd45       | INSIDE                 | 1.119                                                        | 0.529                          | 1247.57            | 660.19             | 0.592                          | 974.04             | 576.73             |
| A_68_P23915348 | chr5:98364470-98364514                            | NM_133738:95489      | Antxr2        | INSIDE                 | 1.119                                                        | 2.120                          | 1242.38            | 2633.50            | 2.372                          | 1133.00            | 2687.86            |
| A_68_P30462677 | chr15:96115709-96115753                           | NM_175251:-2222      | Arid2         | PROMOTER               | 1.119                                                        | 1.739                          | 718.22             | 1249.29            | 1.946                          | 719.96             | 1400.90            |
| A_68_P20958788 | chr1:196803083-196803130                          | NR_033564:47         | C030002c11rik | INSIDE                 | 1.119                                                        | 2.151                          | 717.23             | 1542.80            | 2.408                          | 601.27             | 1447.62            |
| A_68_P24420943 | chr6:46994568-46994616                            | NM_001004357:1984533 | Cntnap2       | INSIDE                 | 1.119                                                        | 3.359                          | 2278.37            | 7652.07            | 3.758                          | 1893.91            | 7116.73            |
| A_68_P26802913 | chr9:106271467-106271511                          | NM_153459:526        | Dusp7         | INSIDE                 | 1.119                                                        | 0.573                          | 1527.48            | 874.68             | 0.641                          | 1155.71            | 740.71             |
| A_68_P26200115 | chr8:119516976-119517022                          | NM_026572:351        | Gesh          | INSIDE                 | 1.119                                                        | 1.450                          | 1471.21            | 2133.09            | 1.622                          | 1306.36            | 2119.18            |
| A_68_P26567943 | chr9:61794500-61794544                            | NM_024245:84         | Kif23         | INSIDE                 | 1.119                                                        | 1.472                          | 1282.91            | 1888.45            | 1.647                          | 1028.16            | 1693.63            |
| A_68_P29725081 | chr14:75347579-75347623                           | NM_001033439:84      | Lrch1         | INSIDE                 | 1.119                                                        | 1.622                          | 3333.98            | 5409.35            | 1.815                          | 2695.17            | 4892.12            |
| A_68_P21309974 | chr2:69423570-69423614                            | NM_001081088:532     | Lrp2          | INSIDE                 | 1.119                                                        | 1.903                          | 1382.58            | 2631.31            | 2.131                          | 1206.67            | 2570.83            |
| A_68_P21742300 | chr2:150835045-150835089                          | NM_207204:68         | Ninl          | INSIDE                 | 1.119                                                        | 2.545                          | 799.09             | 2033.39            | 2.847                          | 712.29             | 2027.63            |
| A_68_P23295438 | chr4:128866763-128866807                          | NM_029036:-58        | S100bbp       | DIVERGENT_PROMOTER     | 1.119                                                        | 1.405                          | 2416.59            | 3394.19            | 1.571                          | 2105.69            | 3308.04            |
| A_68_P25586715 | chr7:148286395-148286439                          | NM_023059:29         | Sigirr        | INSIDE                 | 1.119                                                        | 1.568                          | 807.70             | 1266.29            | 1.754                          | 725.84             | 1273.46            |
| A_68_P25102014 | chr7:54175443-54175487                            | NM_021884:-164       | Tsg101        | PROMOTER               | 1.119                                                        | 1.970                          | 1145.27            | 2256.14            | 2.205                          | 988.56             | 2179.73            |
| A_68_P30149950 | chr15:38448838-38448882                           | NM_001102458:161     | Azin1         | INSIDE                 | 1.118                                                        | 0.528                          | 991.93             | 523.53             | 0.590                          | 861.13             | 508.13             |
| A_68_P28752688 | chr12:114047423-114047467                         | NM_145450:259        | BC022687      | INSIDE                 | 1.118                                                        | 1.656                          | 1170.68            | 1939.07            | 1.851                          | 933.36             | 1728.11            |
| A_68_P21485631 | chr2:103637120-103637164                          | NM_001111289:93      | Caprin1       | INSIDE                 | 1.118                                                        | 0.506                          | 2067.90            | 1047.34            | 0.566                          | 1607.56            | 910.60             |
| A_68_P27934410 | chr11:76660169-76660213                           | NM_007754:320        | Cpd           | INSIDE                 | 1.118                                                        | 2.471                          | 825.48             | 2039.58            | 2.762                          | 706.44             | 1951.44            |



| ProbeName      | Target position of probe on CpG island microarray | TargetID           | GeneSymbol    | CpG island Description | Ratio of relative methylation (TiO <sub>2</sub> -NP/Vehicle) | Sham group                     |                    |                    | TiO <sub>2</sub> -H group      |                    |                    |
|----------------|---------------------------------------------------|--------------------|---------------|------------------------|--------------------------------------------------------------|--------------------------------|--------------------|--------------------|--------------------------------|--------------------|--------------------|
|                |                                                   |                    |               |                        |                                                              | Relative methylation (Cy5/Cy3) | Cy3 signal (Input) | Cy5 signal (MeDIP) | Relative methylation (Cy5/Cy3) | Cy3 signal (Input) | Cy5 signal (MeDIP) |
| A_68_P28051739 | chr11:97490327-97490371                           | NM_175332:682      | E130012A19Rik | INSIDE                 | 1.118                                                        | 2.757                          | 390.68             | 1077.25            | 3.082                          | 352.10             | 1084.99            |
| A_68_P27278197 | chr10:79138491-79138535                           | NM_148934:6358     | Gm16517       | INSIDE                 | 1.118                                                        | 3.378                          | 1917.71            | 6478.74            | 3.776                          | 1572.14            | 5935.78            |
| A_68_P26682077 | chr9:83039520-83039564                            | NM_026122:672      | Hmgn3         | INSIDE                 | 1.118                                                        | 1.602                          | 1610.26            | 2579.30            | 1.790                          | 1387.80            | 2484.26            |
| A_68_P27865437 | chr11:64248821-64248865                           | NM_178870:9        | Hs3st3a1      | INSIDE                 | 1.118                                                        | 1.960                          | 1164.46            | 2282.50            | 2.191                          | 988.93             | 2166.46            |
| A_68_P22698900 | chr4:4720461-4720505                              | NM_177730:-29      | Impad1        | PROMOTER               | 1.118                                                        | 2.283                          | 305.10             | 696.60             | 2.553                          | 307.91             | 786.01             |
| A_68_P21834186 | chr2:167015822-167015866                          | NM_008420:-1545    | Kenb1         | PROMOTER               | 1.118                                                        | 1.765                          | 846.31             | 1493.40            | 1.973                          | 779.28             | 1537.66            |
| A_68_P25034375 | chr7:31758234-31758278                            | NM_001164184:232   | Lsr           | INSIDE                 | 1.118                                                        | 3.748                          | 1408.83            | 5279.87            | 4.188                          | 1133.35            | 4746.87            |
| A_68_P29154200 | chr13:76521644-76521688                           | NM_030174:-742     | Mctp1         | PROMOTER               | 1.118                                                        | 1.674                          | 586.81             | 982.13             | 1.871                          | 551.60             | 1032.07            |
| A_68_P29269010 | chr13:101322324-101322368                         | NM_008756:107      | Ocln          | INSIDE                 | 1.118                                                        | 2.393                          | 1313.83            | 3144.51            | 2.675                          | 1164.18            | 3114.39            |
| A_68_P28974190 | chr13:40827038-40827082                           | NM_001122948:-1248 | Tefap2a       | PROMOTER               | 1.118                                                        | 1.546                          | 2189.51            | 3385.25            | 1.729                          | 1854.80            | 3206.15            |
| A_68_P33007019 | A_68_P33007019                                    |                    |               | Unknown                | 1.118                                                        | 1.718                          | 7636.02            | 13119.22           | 1.921                          | 6500.10            | 12484.72           |
| A_68_P32977626 | A_68_P32977626                                    |                    |               | Unknown                | 1.118                                                        | 2.148                          | 250.87             | 538.96             | 2.402                          | 196.25             | 471.41             |
| A_68_P29056007 | chr13:55701465-55701509                           | NM_146045:15       | B4gal7        | INSIDE                 | 1.117                                                        | 1.664                          | 2212.00            | 3681.16            | 1.859                          | 1699.60            | 3159.23            |
| A_68_P30836894 | chr16:67620955-67620999                           | NM_001145977:177   | Cadm2         | INSIDE                 | 1.117                                                        | 2.724                          | 3542.30            | 9649.26            | 3.044                          | 2838.72            | 8641.29            |
| A_68_P20432996 | chr1:91827206-91827250                            | NM_010262:523      | Gbx2          | INSIDE                 | 1.117                                                        | 1.937                          | 4102.88            | 7948.25            | 2.163                          | 3588.59            | 7763.11            |
| A_68_P25842950 | chr8:48760715-48760759                            | NM_023503:-223     | Ing2          | PROMOTER               | 1.117                                                        | 1.899                          | 1125.08            | 2136.16            | 2.121                          | 1007.55            | 2136.62            |
| A_68_P26228656 | chr8:124277409-124277453                          | NM_020605:22972    | Jph3          | INSIDE                 | 1.117                                                        | 3.656                          | 1070.93            | 3915.12            | 4.084                          | 930.01             | 3797.91            |
| A_68_P27285769 | chr10:80298722-80298766                           | NM_001013758:8040  | Lingo3        | INSIDE                 | 1.117                                                        | 2.229                          | 892.09             | 1988.62            | 2.489                          | 823.80             | 2050.59            |
| A_68_P24065425 | chr5:125658527-125658571                          | NM_011424:1036     | Ncor2         | INSIDE                 | 1.117                                                        | 1.615                          | 1164.70            | 1880.86            | 1.805                          | 993.57             | 1793.04            |
| A_68_P27289568 | chr10:80882945-80882989                           | NM_008688:6952     | Nfic          | INSIDE                 | 1.117                                                        | 2.828                          | 1756.96            | 4969.52            | 3.159                          | 1329.80            | 4200.48            |
| A_68_P32089884 | chr19:36484605-36484649                           | NM_029508:31070    | Pegf5         | INSIDE                 | 1.117                                                        | 3.238                          | 263.75             | 853.95             | 3.617                          | 289.07             | 1045.50            |
| A_68_P29341546 | chr13:114408820-114408864                         | NM_130796:-70      | Snx18         | PROMOTER               | 1.117                                                        | 2.215                          | 373.58             | 827.36             | 2.475                          | 355.67             | 880.15             |
| A_68_P28051298 | chr11:97413135-97413179                           | NM_018873:23284    | Sreml1        | INSIDE                 | 1.117                                                        | 2.247                          | 1005.72            | 2260.14            | 2.510                          | 860.66             | 2160.05            |
| A_68_P24593027 | chr6:83318037-83318081                            | NM_183138:73614    | Tet3          | INSIDE                 | 1.117                                                        | 1.521                          | 737.64             | 1121.77            | 1.699                          | 697.04             | 1183.97            |
| A_68_P29998443 | chr15:8119317-8119361                             | NM_001162906:233   | 2410089E03Rik | INSIDE                 | 1.116                                                        | 1.501                          | 1002.48            | 1505.21            | 1.675                          | 847.70             | 1419.87            |
| A_68_P26601253 | chr9:67679488-67679532                            | NM_001163143:627   | C2cd4a        | INSIDE                 | 1.116                                                        | 0.579                          | 2142.64            | 1240.46            | 0.646                          | 1646.71            | 1064.16            |
| A_68_P31103373 | chr17:25522563-25522607                           | NM_001163691:48144 | Caena1h       | INSIDE                 | 1.116                                                        | 2.200                          | 1594.60            | 3508.64            | 2.456                          | 1271.47            | 3122.18            |
| A_68_P27101045 | chr10:43298595-43298639                           | NM_009846:-358     | Cd24a         | PROMOTER               | 1.116                                                        | 1.659                          | 1624.72            | 2695.90            | 1.851                          | 1304.70            | 2414.99            |
| A_68_P25582339 | chr7:147302298-147302342                          | NM_053119:2        | Echs1         | INSIDE                 | 1.116                                                        | 1.380                          | 2731.68            | 3768.61            | 1.539                          | 2205.72            | 3394.84            |
| A_68_P28198383 | chr12:4038752-4038796                             | NM_001082483:141   | Efr3b         | INSIDE                 | 1.116                                                        | 1.659                          | 1178.53            | 1955.39            | 1.852                          | 906.67             | 1679.13            |
| A_68_P28577470 | chr12:81858836-81858880                           | NM_001008423:2844  | Gm1568        | INSIDE                 | 1.116                                                        | 3.116                          | 425.19             | 1325.03            | 3.477                          | 397.47             | 1382.16            |
| A_68_P24326993 | chr6:29457921-29457965                            | NM_001029985:10    | Kep           | INSIDE                 | 1.116                                                        | 1.460                          | 1608.78            | 2348.02            | 1.630                          | 1361.76            | 2219.01            |
| A_68_P30349814 | chr15:76497752-76497796                           | NM_010630:6704     | Kife2         | INSIDE                 | 1.116                                                        | 2.587                          | 1147.70            | 2968.96            | 2.888                          | 958.87             | 2768.77            |
| A_68_P22218636 | chr3:68810008-68810052                            | NR_029529:-3663    | Mir15b        | PROMOTER               | 1.116                                                        | 2.535                          | 1158.84            | 2937.45            | 2.829                          | 999.36             | 2827.23            |
| A_68_P30132612 | chr15:35225823-35225867                           | NM_054049:-22      | Osr2          | PROMOTER               | 1.116                                                        | 2.510                          | 1294.26            | 3248.09            | 2.800                          | 1302.66            | 3647.52            |
| A_68_P30346580 | chr15:76007443-76007487                           | NM_201394:18676    | Plec          | INSIDE                 | 1.116                                                        | 2.179                          | 505.18             | 1100.96            | 2.433                          | 424.99             | 1033.88            |
| A_68_P26022782 | chr8:87469669-87469713                            | NM_144929:-1199    | Rtbdn         | DIVERGENT_PROMOTER     | 1.116                                                        | 2.277                          | 731.92             | 1666.68            | 2.541                          | 676.60             | 1719.38            |
| A_68_P31677778 | chr18:46756824-46756868                           | NM_025698:343      | Tmed7         | INSIDE                 | 1.116                                                        | 2.791                          | 628.93             | 1755.62            | 3.116                          | 540.29             | 1683.46            |
| A_68_P28166387 | chr11:117516412-117516456                         | NM_198022:832      | Tnrc6c        | INSIDE                 | 1.116                                                        | 5.767                          | 469.60             | 2708.04            | 6.435                          | 501.11             | 3224.86            |
| A_68_P25008268 | chr7:25866633-25866677                            | NM_175477:4390     | Zfp574        | INSIDE                 | 1.116                                                        | 1.888                          | 1529.88            | 2887.88            | 2.107                          | 1202.26            | 2532.57            |
| A_68_P20049945 | chr1:15277016-15277060                            |                    |               | Unknown                | 1.116                                                        | 2.104                          | 4269.61            | 8982.19            | 2.349                          | 3589.69            | 8431.53            |
| A_68_P28751869 | chr12:113931759-113931803                         | AK028601:1         |               | INSIDE                 | 1.116                                                        | 1.522                          | 1468.97            | 2235.45            | 1.699                          | 1275.23            | 2166.20            |
| A_68_P23437422 | chr4:154624331-154624375                          | NM_001190445:278   | 2610002J02Rik | INSIDE                 | 1.115                                                        | 1.638                          | 5100.60            | 8357.15            | 1.828                          | 3421.28            | 6253.01            |
| A_68_P26548139 | chr9:58335761-58335806                            | NM_176921:-626     | 6030419C18Rik | PROMOTER               | 1.115                                                        | 1.504                          | 2498.16            | 3758.16            | 1.677                          | 2009.98            | 3371.06            |
| A_68_P32151689 | chr19:47806170-47806214                           | NM_026377:-53      | 6330577E15Rik | PROMOTER               | 1.115                                                        | 1.534                          | 915.79             | 1404.87            | 1.711                          | 802.12             | 1372.21            |
| A_68_P20825059 | chr1:172797927-172797976                          | NM_001081304:-49   | Atf6          | PROMOTER               | 1.115                                                        | 1.508                          | 2595.38            | 3913.20            | 1.682                          | 1975.76            | 3322.78            |
| A_68_P29977215 | chr15:3977091-3977135                             | NR_028266:294      | BC037032      | INSIDE                 | 1.115                                                        | 1.651                          | 487.07             | 804.29             | 1.841                          | 442.14             | 813.92             |
| A_68_P28056294 | chr11:98274418-98274462                           | NM_001003817:643   | Erbp2         | INSIDE                 | 1.115                                                        | 1.754                          | 1283.51            | 2251.25            | 1.955                          | 1241.19            | 2426.34            |
| A_68_P26132791 | chr8:107817394-107817438                          | NM_177788:2582     | Exoc3l        | INSIDE                 | 1.115                                                        | 2.419                          | 1005.77            | 2432.82            | 2.696                          | 896.78             | 2417.66            |
| A_68_P23917032 | chr5:98683315-98683359                            | NM_010203:134      | Fgf5          | INSIDE                 | 1.115                                                        | 1.879                          | 1700.68            | 3195.80            | 2.095                          | 1375.73            | 2881.99            |
| A_68_P27946742 | chr11:78858560-78858604                           | NM_013571:101274   | Ksr1          | INSIDE                 | 1.115                                                        | 3.805                          | 2731.57            | 10394.15           | 4.241                          | 1933.37            | 8200.24            |

| ProbeName      | Target position of probe on CpG island microarray | TargetID                | GeneSymbol    | CpG island Description | Ratio of relative methylation (TiO <sub>2</sub> -NP/Vehicle) | Sham group                     |                    |                    | TiO <sub>2</sub> -H group      |                    |                    |
|----------------|---------------------------------------------------|-------------------------|---------------|------------------------|--------------------------------------------------------------|--------------------------------|--------------------|--------------------|--------------------------------|--------------------|--------------------|
|                |                                                   |                         |               |                        |                                                              | Relative methylation (Cy5/Cy3) | Cy3 signal (Input) | Cy5 signal (MeDIP) | Relative methylation (Cy5/Cy3) | Cy3 signal (Input) | Cy5 signal (MeDIP) |
| A_68_P26643864 | chr9:75257719-75257763                            | NM_027418:-574          | Mapk6         | PROMOTER               | 1.115                                                        | 1.868                          | 2591.67            | 4841.21            | 2.083                          | 2165.48            | 4510.34            |
| A_68_P22558740 | chr3:136333384-136333428                          | NM_008913:-327          | Ppp3ca        | PROMOTER               | 1.115                                                        | 1.937                          | 1599.62            | 3097.88            | 2.159                          | 1304.06            | 2815.72            |
| A_68_P24063269 | A_68_P24063269                                    |                         |               | Unknown                | 1.115                                                        | 4.671                          | 149.10             | 696.49             | 5.208                          | 139.94             | 728.81             |
| A_68_P27929276 | chr11:75780169-75780213                           |                         |               | Unknown                | 1.115                                                        | 1.595                          | 1215.60            | 1938.81            | 1.779                          | 1111.80            | 1977.86            |
| A_68_P23265703 | chr4:123667997-123668041                          |                         |               | Unknown                | 1.115                                                        | 3.126                          | 453.85             | 1418.94            | 3.486                          | 376.38             | 1312.22            |
| A_68_P26940976 | chr10:112111956-11212000                          |                         |               | Unknown                | 1.115                                                        | 3.364                          | 7792.34            | 26213.94           | 3.750                          | 5605.59            | 21021.23           |
| A_68_P31422207 | chr17:87682043-87682087                           | NR_015506:90            | 4833418N02Rik | INSIDE                 | 1.114                                                        | 1.689                          | 2165.24            | 3657.71            | 1.883                          | 2014.50            | 3792.68            |
| A_68_P24045429 | chr5:122043432-122043476                          | NM_009656:379           | Aldh2         | INSIDE                 | 1.114                                                        | 1.963                          | 787.37             | 1545.57            | 2.187                          | 717.29             | 1568.84            |
| A_68_P27854482 | chr11:62352254-62352298                           | NM_028448:487           | Cenpv         | INSIDE                 | 1.114                                                        | 1.346                          | 5253.97            | 7074.21            | 1.499                          | 4201.58            | 6299.37            |
| A_68_P22318564 | chr3:89125165-89125211                            | NM_010108:1613          | Efn3          | INSIDE                 | 1.114                                                        | 2.233                          | 276.32             | 616.94             | 2.487                          | 261.03             | 649.22             |
| A_68_P23854795 | chr5:84846156-84846200                            | NM_007937:229           | Epha5         | INSIDE                 | 1.114                                                        | 2.305                          | 1034.51            | 2384.41            | 2.568                          | 884.68             | 2271.42            |
| A_68_P25369178 | chr7:107855525-107855569                          | NM_178764:331           | Fam168a       | INSIDE                 | 1.114                                                        | 3.651                          | 10253.38           | 37438.04           | 4.068                          | 7168.98            | 29160.87           |
| A_68_P21477091 | chr2:102291430-102291474                          | NM_010218:497           | Fjx1          | INSIDE                 | 1.114                                                        | 4.246                          | 486.82             | 2067.13            | 4.729                          | 495.88             | 2345.01            |
| A_68_P24613523 | chr6:86992531-86992575                            | NM_013528:-287          | Gfpt1         | PROMOTER               | 1.114                                                        | 1.609                          | 2066.64            | 3326.16            | 1.793                          | 1834.27            | 3288.07            |
| A_68_P25730815 | chr8:27229276-27229320                            | NM_207659:398           | Hook3         | INSIDE                 | 1.114                                                        | 2.140                          | 1155.47            | 2472.37            | 2.384                          | 1065.43            | 2540.00            |
| A_68_P28918887 | chr13:30842448-30842492                           | NM_013674:1344          | Irf4          | INSIDE                 | 1.114                                                        | 1.813                          | 1241.18            | 2250.41            | 2.021                          | 1048.66            | 2118.97            |
| A_68_P23753093 | chr5:65213285-65213329                            | NM_008453:18545         | Klf3          | INSIDE                 | 1.114                                                        | 2.832                          | 878.61             | 2488.43            | 3.154                          | 748.01             | 2359.37            |
| A_68_P29629463 | chr14:58318497-58318541                           | NM_015771:46442         | Lats2         | INSIDE                 | 1.114                                                        | 4.979                          | 903.70             | 4499.29            | 5.545                          | 858.88             | 4762.66            |
| A_68_P29233343 | chr13:94943998-94944042                           | NM_172589:116270        | Lhfp12        | INSIDE                 | 1.114                                                        | 0.567                          | 1271.89            | 721.79             | 0.632                          | 938.13             | 592.89             |
| A_68_P31827984 | chr7:73974953-73974997                            | NM_145494:72            | Me2           | INSIDE                 | 1.114                                                        | 3.584                          | 349.24             | 1251.76            | 3.994                          | 323.03             | 1290.08            |
| A_68_P22615133 | chr3:146184298-146184342                          | NM_027371:67            | Rpf1          | INSIDE                 | 1.114                                                        | 1.483                          | 725.59             | 1075.86            | 1.652                          | 667.49             | 1102.41            |
| A_68_P20616239 | chr1:133423080-133423124                          | NM_001081011:836        | Srgap2        | INSIDE                 | 1.114                                                        | 2.210                          | 999.85             | 2209.17            | 2.461                          | 888.08             | 2185.28            |
| A_68_P27641464 | chr11:22412537-22412581                           | NM_153596:273           | Tmem17        | INSIDE                 | 1.114                                                        | 2.681                          | 566.97             | 1520.28            | 2.988                          | 581.37             | 1737.13            |
| A_68_P27287710 | chr10:80610694-80610738                           | NM_010731:11701         | Zbtb7a        | INSIDE                 | 1.114                                                        | 4.580                          | 942.47             | 4316.84            | 5.104                          | 733.20             | 3742.34            |
| A_68_P30423043 | chr15:88919652-88919696                           | NM_027905:138           | 1300018J18Rik | INSIDE                 | 1.113                                                        | 3.607                          | 327.03             | 1179.61            | 4.016                          | 302.25             | 1213.94            |
| A_68_P31939676 | chr19:7491566-7491610                             | NM_175381:-526          | 2700081O15Rik | PROMOTER               | 1.113                                                        | 1.862                          | 501.91             | 934.69             | 2.073                          | 520.79             | 1079.53            |
| A_68_P33007147 | chr9_random:49997-50041                           | NR_015516:-3390         | 4930526I15Rik | PROMOTER               | 1.113                                                        | 2.617                          | 1448.49            | 3790.79            | 2.912                          | 1076.05            | 3133.92            |
| A_68_P24946543 | chr7:3597351-3597395                              | NM_146176:502           | Cnot3         | INSIDE                 | 1.113                                                        | 2.337                          | 873.23             | 2040.34            | 2.601                          | 708.26             | 1842.52            |
| A_68_P33015614 | chr1_random:49829-49873                           | NM_026866:135488        | Disp1         | INSIDE                 | 1.113                                                        | 2.077                          | 392.09             | 814.30             | 2.311                          | 386.05             | 892.35             |
| A_68_P2277889  | chr4:22284762-22284806                            | NM_172988:73            | Fbx14         | INSIDE                 | 1.113                                                        | 3.532                          | 1100.87            | 3887.93            | 3.930                          | 966.40             | 3798.19            |
| A_68_P26886027 | chr9:121766646-121766690                          | NM_001112668:-19        | Gm9790        | PROMOTER               | 1.113                                                        | 1.494                          | 1377.26            | 2058.08            | 1.663                          | 1255.35            | 2087.66            |
| A_68_P22592457 | chr3:142428332-142428376                          | NM_145546:144           | Gtf2b         | INSIDE                 | 1.113                                                        | 1.688                          | 970.57             | 1638.19            | 1.878                          | 920.68             | 1728.99            |
| A_68_P25958255 | chr8:74203600-74203644                            | NM_001190830:3341       | Jak3          | INSIDE                 | 1.113                                                        | 2.852                          | 1118.31            | 3189.12            | 3.175                          | 975.45             | 3096.71            |
| A_68_P25022783 | chr7:29383081-29383125                            | NM_027470:101           | Pak4          | INSIDE                 | 1.113                                                        | 1.474                          | 2496.37            | 3680.31            | 1.641                          | 1917.92            | 3146.56            |
| A_68_P23891543 | chr5:92392231-92392285                            | NM_026557:-164          | Rehy1         | PROMOTER               | 1.113                                                        | 1.683                          | 979.89             | 1648.88            | 1.873                          | 723.63             | 1355.19            |
| A_68_P31119183 | chr17:28044657-28044701                           | NM_026836:-9            | Taf11         | DIVERGENT_PROMOTER     | 1.113                                                        | 1.776                          | 1270.30            | 2256.34            | 1.978                          | 1129.63            | 2233.95            |
| A_68_P29033261 | chr13:51690524-51690568                           |                         |               | Unknown                | 1.113                                                        | 3.699                          | 6892.75            | 25497.87           | 4.117                          | 5071.89            | 20882.56           |
| A_68_P29339701 | chr13:114083707-114083751                         |                         |               | Unknown                | 1.113                                                        | 1.442                          | 1363.39            | 1965.56            | 1.605                          | 1129.48            | 1813.02            |
| A_68_P29583268 | chr14:48269057-48269101                           | BC075697:10             |               | INSIDE                 | 1.113                                                        | 1.509                          | 989.59             | 1493.78            | 1.681                          | 941.39             | 1582.04            |
| A_68_P27503018 | chr10:120788390-120788434                         | ENSMUST00000078515:8085 |               | DOWNSTREAM             | 1.113                                                        | 2.683                          | 371.36             | 996.39             | 2.986                          | 351.03             | 1048.27            |
| A_68_P23915350 | chr5:98364657-98364701                            | NM_133738:95303         | Antxr2        | INSIDE                 | 1.112                                                        | 2.120                          | 953.19             | 2021.14            | 2.359                          | 921.02             | 2172.29            |
| A_68_P24593642 | chr6:83405946-83405990                            | NR_028382:14220         | B230319C09Rik | DOWNSTREAM             | 1.112                                                        | 1.877                          | 751.11             | 1409.48            | 2.087                          | 670.10             | 1398.28            |
| A_68_P30404229 | chr15:85809217-85809261                           | NM_009886:54969         | Celsr1        | INSIDE                 | 1.112                                                        | 3.007                          | 1997.02            | 6005.57            | 3.346                          | 1606.39            | 5374.18            |
| A_68_P32982273 | chr5:134998822-134998866                          | NM_001039162:29460      | Clip2         | INSIDE                 | 1.112                                                        | 1.982                          | 2247.68            | 4454.57            | 2.203                          | 1690.13            | 3724.02            |
| A_68_P28056291 | chr11:98274041-98274085                           | NM_001003817:265        | Erb2          | INSIDE                 | 1.112                                                        | 2.516                          | 612.86             | 1541.83            | 2.796                          | 528.87             | 1478.90            |
| A_68_P30468548 | chr15:97154022-97154066                           | NM_172293:76507         | Fam113b       | INSIDE                 | 1.112                                                        | 1.571                          | 831.11             | 1305.82            | 1.746                          | 653.46             | 1141.25            |
| A_68_P20091644 | chr1:24107112-24107156                            | NM_026604:46            | Fam135a       | INSIDE                 | 1.112                                                        | 2.543                          | 815.70             | 2074.07            | 2.827                          | 776.47             | 2195.41            |
| A_68_P23222369 | chr4:114598689-114598733                          | NM_015758:-92           | Foxe3         | PROMOTER               | 1.112                                                        | 2.392                          | 2267.12            | 5423.63            | 2.659                          | 1717.67            | 4568.11            |
| A_68_P29130723 | chr13:72100965-72101009                           | NM_010573:185           | Irx1          | INSIDE                 | 1.112                                                        | 0.481                          | 2187.76            | 1052.03            | 0.535                          | 1882.94            | 1006.85            |
| A_68_P31343017 | chr17:73268907-73268952                           | NM_029999:1285          | Lhb           | INSIDE                 | 1.112                                                        | 1.699                          | 431.13             | 732.52             | 1.890                          | 421.40             | 796.33             |
| A_68_P25535616 | chr7:139802586-139802630                          | NM_029609:283           | Lhpp          | INSIDE                 | 1.112                                                        | 2.313                          | 1321.17            | 3055.92            | 2.572                          | 1145.32            | 2945.89            |

| ProbeName      | Target position of probe on CpG island microarray | TargetID              | GeneSymbol    | CpG island Description | Ratio of relative methylation (TiO <sub>2</sub> -NP/Vehicle) | Sham group                     |                    |                    | TiO <sub>2</sub> -H group      |                    |                    |
|----------------|---------------------------------------------------|-----------------------|---------------|------------------------|--------------------------------------------------------------|--------------------------------|--------------------|--------------------|--------------------------------|--------------------|--------------------|
|                |                                                   |                       |               |                        |                                                              | Relative methylation (Cy5/Cy3) | Cy3 signal (Input) | Cy5 signal (MeDIP) | Relative methylation (Cy5/Cy3) | Cy3 signal (Input) | Cy5 signal (MeDIP) |
| A_68_P31256024 | chr17:56564825-56564869                           | NM_011218:51057       | Ptprs         | INSIDE                 | 1.112                                                        | 1.606                          | 936.97             | 1504.88            | 1.786                          | 871.52             | 1556.46            |
| A_68_P20785985 | chr1:165859996-165860040                          | NM_028776:-176        | Scyl3         | PROMOTER               | 1.112                                                        | 1.426                          | 1040.08            | 1483.08            | 1.585                          | 915.40             | 1450.89            |
| A_68_P20826332 | chr1:173080599-173080643                          | NM_025321:114         | Sdhe          | INSIDE                 | 1.112                                                        | 1.778                          | 1525.95            | 2713.81            | 1.978                          | 1417.45            | 2803.12            |
| A_68_P31320372 | chr17:69186496-69186540                           | NM_001206661:43       | Tmem200c      | INSIDE                 | 1.112                                                        | 2.543                          | 813.95             | 2069.61            | 2.828                          | 756.39             | 2139.13            |
| A_68_P24838525 | chr6:128306097-128306141                          | NM_011657:-249        | Tulp3         | PROMOTER               | 1.112                                                        | 2.846                          | 2515.29            | 7157.50            | 3.163                          | 2156.74            | 6821.81            |
| A_68_P24091287 | chr5:130417556-130417600                          | NM_001001327:-404     | Vkorc11l      | PROMOTER               | 1.112                                                        | 2.185                          | 13082.56           | 28590.68           | 2.430                          | 8531.87            | 20730.25           |
| A_68_P25264703 | chr7:87226955-87226999                            | NM_175433:55863       | Zfp710        | INSIDE                 | 1.112                                                        | 2.269                          | 1689.27            | 3833.05            | 2.523                          | 1262.18            | 3184.37            |
| A_68_P30639624 | A_68_P30639624                                    |                       |               | Unknown                | 1.112                                                        | 2.441                          | 701.47             | 1712.38            | 2.715                          | 571.63             | 1551.86            |
| A_68_P27678668 | chr11:30167911-30167955                           | ENSMUST0000006629:237 |               | INSIDE                 | 1.112                                                        | 1.894                          | 1065.55            | 2018.57            | 2.107                          | 1017.12            | 2143.22            |
| A_68_P21224227 | chr2:53051236-53051280                            | NM_022989:141         | Arl6ip6       | INSIDE                 | 1.111                                                        | 1.879                          | 1413.11            | 2655.81            | 2.088                          | 1235.80            | 2580.52            |
| A_68_P21040931 | chr2:18616371-18616415                            | NM_001001334:-4256    | BC061194      | PROMOTER               | 1.111                                                        | 0.540                          | 1195.96            | 645.92             | 0.600                          | 956.04             | 573.79             |
| A_68_P24820861 | chr6:125444215-125444259                          | NM_007657:537         | Cd9           | INSIDE                 | 1.111                                                        | 1.639                          | 1070.63            | 1754.88            | 1.821                          | 845.55             | 1539.34            |
| A_68_P27263124 | chr10:76077361-76077405                           | NM_146007:8767        | Col6a2        | INSIDE                 | 1.111                                                        | 2.028                          | 1160.83            | 2353.72            | 2.253                          | 925.57             | 2084.92            |
| A_68_P22310619 | chr3:87710732-87710776                            | NM_008231:512         | HdGF          | INSIDE                 | 1.111                                                        | 1.483                          | 1273.84            | 1889.26            | 1.648                          | 1130.10            | 1862.26            |
| A_68_P20945385 | chr1:194596745-194596789                          | NM_144881:647         | Hhat          | INSIDE                 | 1.111                                                        | 1.714                          | 2974.03            | 5097.13            | 1.905                          | 2328.39            | 4434.95            |
| A_68_P21833676 | chr2:166930579-166930623                          | NM_008420:83699       | Kenb1         | INSIDE                 | 1.111                                                        | 2.670                          | 1288.49            | 3440.02            | 2.966                          | 937.32             | 2780.49            |
| A_68_P25088268 | chr7:51844686-51844730                            | NM_008422:-1547       | Kcnc3         | PROMOTER               | 1.111                                                        | 1.651                          | 3342.49            | 5518.85            | 1.835                          | 2543.23            | 4666.63            |
| A_68_P29011273 | chr13:47139014-47139058                           | NM_172262:129         | Kdm1b         | INSIDE                 | 1.111                                                        | 1.637                          | 715.65             | 1171.28            | 1.818                          | 697.83             | 1268.99            |
| A_68_P22171326 | chr3:58811151-58811195                            | NM_177855:273         | Med12l        | INSIDE                 | 1.111                                                        | 1.508                          | 1081.75            | 1630.89            | 1.675                          | 971.78             | 1627.37            |
| A_68_P24027248 | chr5:119010105-119010149                          | NM_172424:-601        | Med13l        | PROMOTER               | 1.111                                                        | 4.378                          | 748.09             | 3275.00            | 4.862                          | 1173.50            | 5705.17            |
| A_68_P20759145 | chr1:161162430-161162474                          | NM_011931:-4          | Rfwd2         | PROMOTER               | 1.111                                                        | 2.955                          | 1143.70            | 3379.93            | 3.284                          | 963.50             | 3164.05            |
| A_68_P29047303 | chr13:54167121-54167165                           | NM_027324:-71         | Sfxn1         | PROMOTER               | 1.111                                                        | 3.541                          | 1370.09            | 4851.75            | 3.934                          | 1193.53            | 4694.97            |
| A_68_P25034246 | chr7:31740698-31740742                            | NM_011680:1102        | Usf2          | INSIDE                 | 1.111                                                        | 2.193                          | 1123.73            | 2463.85            | 2.436                          | 962.08             | 2343.40            |
| A_68_P31257914 | chr17:56856378-56856423                           | NM_178926:-56         | Vmac          | PROMOTER               | 1.111                                                        | 4.449                          | 2235.16            | 9945.32            | 4.945                          | 1614.99            | 7986.65            |
| A_68_P25089145 | chr7:52004212-52004256                            | NM_133945:236         | Vrk3          | INSIDE                 | 1.111                                                        | 1.937                          | 493.34             | 955.39             | 2.152                          | 458.75             | 987.13             |
| A_68_P23338967 | chr4:136832827-136832871                          | NM_009523:-701        | Wnt4          | PROMOTER               | 1.111                                                        | 1.700                          | 2364.74            | 4021.18            | 1.890                          | 2049.24            | 3872.91            |
| A_68_P24319362 | chr6:28210996-28211040                            | NM_001081678:583      | Zfp800        | INSIDE                 | 1.111                                                        | 1.471                          | 1695.37            | 2494.57            | 1.634                          | 1408.26            | 2301.25            |
| A_68_P27258519 | chr10:75226844-75226888                           | NM_172549:236         | Cabin1        | INSIDE                 | 1.110                                                        | 1.792                          | 1206.26            | 2162.03            | 1.990                          | 1061.42            | 2111.82            |
| A_68_P31378406 | chr17:80014550-80014594                           | NM_201361:333         | Fam82a1       | INSIDE                 | 1.110                                                        | 2.626                          | 879.04             | 2308.04            | 2.914                          | 800.64             | 2333.02            |
| A_68_P25419719 | chr7:118742491-118742535                          | NM_173739:180979      | Galnt4        | INSIDE                 | 1.110                                                        | 2.155                          | 766.62             | 1652.06            | 2.392                          | 643.39             | 1539.13            |
| A_68_P22531296 | chr3:130974638-130974682                          | NM_008212:295         | Hadh          | INSIDE                 | 1.110                                                        | 2.299                          | 1623.78            | 3733.83            | 2.553                          | 1346.68            | 3438.03            |
| A_68_P29101874 | chr13:65214224-65214268                           | NM_001083901:44       | Hiatl1        | INSIDE                 | 1.110                                                        | 1.621                          | 2617.70            | 4243.51            | 1.799                          | 2256.35            | 4058.67            |
| A_68_P27704165 | chr11:34935121-34935165                           | NM_011412:185         | Slit3         | INSIDE                 | 1.110                                                        | 0.571                          | 1362.09            | 777.29             | 0.633                          | 1173.57            | 743.22             |
| A_68_P20510432 | chr1:108693123-108693167                          | NM_009190:158         | Vps4b         | INSIDE                 | 1.110                                                        | 1.691                          | 5543.94            | 9374.80            | 1.877                          | 4039.01            | 7580.02            |
| A_68_P27532857 | chr10:126342966-126343010                         | NM_026858:-4561       | Xrcc6bp1      | PROMOTER               | 1.110                                                        | 1.431                          | 857.69             | 1227.16            | 1.588                          | 825.60             | 1311.03            |
| A_68_P28751778 | chr12:113917322-113917366                         | NM_001100460:294      | Zbtb42        | INSIDE                 | 1.110                                                        | 1.609                          | 472.21             | 759.56             | 1.785                          | 461.88             | 824.44             |
| A_68_P26152541 | chr8:111238563-111238607                          | NM_007496:41          | Zfx3          | INSIDE                 | 1.110                                                        | 2.268                          | 1060.03            | 2404.62            | 2.518                          | 883.51             | 2225.09            |
| A_68_P21068971 | chr2:24805706-24805750                            | NM_026021:407         | Zmynd19       | INSIDE                 | 1.110                                                        | 1.706                          | 1159.62            | 1978.09            | 1.893                          | 1062.88            | 2011.82            |
| A_68_P20250390 | chr1:57028403-57028447                            | NR_024325:112         | 9130024F11Rik | INSIDE                 | 1.109                                                        | 1.990                          | 1624.83            | 3233.13            | 2.207                          | 1255.14            | 2769.81            |
| A_68_P21908931 | chr2:180891580-180891624                          | NM_007906:118         | Eef1a2        | INSIDE                 | 1.109                                                        | 2.085                          | 1456.02            | 3035.20            | 2.312                          | 1094.41            | 2529.79            |
| A_68_P27835271 | chr11:58990590-58990634                           | NM_175452:5716        | Gjc2          | INSIDE                 | 1.109                                                        | 1.458                          | 5359.93            | 7816.85            | 1.617                          | 4170.42            | 6745.25            |
| A_68_P20644876 | chr1:138156784-138156828                          | NM_001101516:644      | Gpr25         | INSIDE                 | 1.109                                                        | 1.402                          | 1287.57            | 1804.58            | 1.555                          | 1133.29            | 1761.95            |
| A_68_P28150134 | chr11:114713892-114713936                         | NM_147217:571         | Gprec5c       | INSIDE                 | 1.109                                                        | 2.561                          | 1014.17            | 2597.21            | 2.840                          | 972.71             | 2762.72            |
| A_68_P24449037 | chr6:52153900-52153944                            | NM_010453:664         | Hoxa5         | INSIDE                 | 1.109                                                        | 1.494                          | 943.76             | 1409.66            | 1.657                          | 860.36             | 1425.53            |
| A_68_P27804081 | chr11:53113814-53113858                           | NM_008300:145         | Hspa4         | INSIDE                 | 1.109                                                        | 1.404                          | 1064.35            | 1494.83            | 1.558                          | 973.51             | 1516.26            |
| A_68_P25259447 | chr7:86293791-86293835                            | NM_001045489:134      | Mfge8         | INSIDE                 | 1.109                                                        | 3.213                          | 1304.45            | 4190.87            | 3.563                          | 1168.73            | 4163.92            |
| A_68_P28161653 | chr11:116715108-116715152                         | NM_178620:-198        | Mfsd11        | DIVERGENT_PROMOTER     | 1.109                                                        | 1.625                          | 670.74             | 1089.79            | 1.802                          | 629.73             | 1134.94            |
| A_68_P21070358 | chr2:25036517-25036561                            | NM_025980:261         | Nrarp         | INSIDE                 | 1.109                                                        | 2.701                          | 453.29             | 1224.50            | 2.995                          | 517.98             | 1551.53            |
| A_68_P31029165 | chr17:8993570-8993614                             | NM_011866:-1017       | Pde10a        | PROMOTER               | 1.109                                                        | 2.698                          | 1862.75            | 5025.80            | 2.992                          | 1458.19            | 4363.34            |
| A_68_P24956666 | chr7:6682979-6683023                              | NM_008817:130         | Peg3          | INSIDE                 | 1.109                                                        | 3.275                          | 1574.87            | 5158.22            | 3.633                          | 1437.93            | 5223.32            |
| A_68_P25614471 | chr8:3537772-3537816                              | NM_001122818:22411    | Pnpla6        | INSIDE                 | 1.109                                                        | 2.222                          | 1529.41            | 3397.94            | 2.464                          | 1163.71            | 2867.45            |

| ProbeName      | Target position of probe on CpG island microarray | TargetID               | GeneSymbol    | CpG island Description | Ratio of relative methylation (TiO <sub>2</sub> -NP/Vehicle) | Sham group                     |                    |                    | TiO <sub>2</sub> -H group      |                    |                    |
|----------------|---------------------------------------------------|------------------------|---------------|------------------------|--------------------------------------------------------------|--------------------------------|--------------------|--------------------|--------------------------------|--------------------|--------------------|
|                |                                                   |                        |               |                        |                                                              | Relative methylation (Cy5/Cy3) | Cy3 signal (Input) | Cy5 signal (MeDIP) | Relative methylation (Cy5/Cy3) | Cy3 signal (Input) | Cy5 signal (MeDIP) |
| A_68_P30426168 | chr15:89422228-89422272                           | NM_026817:104          | Rab12         | INSIDE                 | 1.109                                                        | 2.122                          | 2315.54            | 4913.31            | 2.353                          | 1862.89            | 4382.98            |
| A_68_P21395216 | chr2:84726819-84726863                            | NM_199223:9            | Rtn4rl2       | INSIDE                 | 1.109                                                        | 2.606                          | 752.21             | 1959.94            | 2.889                          | 728.75             | 2105.30            |
| A_68_P31254017 | chr17:56263391-56263435                           | NM_013662:9863         | Sema6b        | INSIDE                 | 1.109                                                        | 2.153                          | 518.00             | 1115.45            | 2.388                          | 524.22             | 1252.00            |
| A_68_P22081036 | chr3:40513212-40513256                            | NM_178386:442          | Slc25a31      | INSIDE                 | 1.109                                                        | 1.885                          | 1023.93            | 1929.70            | 2.090                          | 829.68             | 1734.17            |
| A_68_P26133220 | chr8:107872806-107872850                          | NM_001081332:671       | Slc9a5        | INSIDE                 | 1.109                                                        | 1.627                          | 1288.32            | 2096.66            | 1.805                          | 1116.65            | 2015.82            |
| A_68_P27704164 | chr11:34934976-34935020                           | NM_011412:41           | Slit3         | INSIDE                 | 1.109                                                        | 1.592                          | 762.74             | 1214.01            | 1.766                          | 751.57             | 1327.02            |
| A_68_P28862224 | chr13:19487507-19487551                           | NM_024270:93           | Stard3nl      | INSIDE                 | 1.109                                                        | 1.643                          | 627.75             | 1031.42            | 1.822                          | 530.04             | 965.89             |
| A_68_P32008254 | chr19:21867188-21867232                           | NM_001033759:14379     | Tmem2         | INSIDE                 | 1.109                                                        | 2.746                          | 1146.65            | 3148.31            | 3.046                          | 941.66             | 2868.34            |
| A_68_P25772480 | chr8:35217817-35217861                            | NM_026432:222          | Tmem66        | INSIDE                 | 1.109                                                        | 2.320                          | 1364.74            | 3166.46            | 2.572                          | 1172.19            | 3014.98            |
| A_68_P21568845 | chr2:119119812-119119856                          | NM_172269:5357         | Vps18         | INSIDE                 | 1.109                                                        | 2.941                          | 487.14             | 1432.60            | 3.260                          | 466.95             | 1522.27            |
| A_68_P26494151 | chr9:48644017-48644061                            | NM_001033324:12        | Zbtb16        | INSIDE                 | 1.109                                                        | 1.612                          | 2057.02            | 3315.34            | 1.788                          | 1692.83            | 3026.31            |
| A_68_P33005900 | A_68_P33005900                                    |                        | Unknown       |                        | 1.109                                                        | 1.915                          | 696.22             | 1333.10            | 2.123                          | 570.40             | 1211.18            |
| A_68_P23692813 | chr5:52504803-52504847                            | AK076709:-3727         |               | PROMOTER               | 1.109                                                        | 1.371                          | 6727.97            | 9221.92            | 1.520                          | 5127.52            | 7791.56            |
| A_68_P31323975 | chr17:69788589-69788633                           | NM_001145192:-55       | A330050F15Rik | PROMOTER               | 1.108                                                        | 1.828                          | 865.81             | 1582.90            | 2.025                          | 805.30             | 1630.86            |
| A_68_P28694107 | chr12:104116017-104116061                         | NM_172806:578          | Btdb7         | INSIDE                 | 1.108                                                        | 1.799                          | 394.99             | 710.61             | 1.994                          | 387.44             | 772.43             |
| A_68_P24123515 | chr5:137358798-137358842                          | NM_024474:157          | Emid2         | INSIDE                 | 1.108                                                        | 2.190                          | 1671.07            | 3659.78            | 2.426                          | 1545.38            | 3749.28            |
| A_68_P30345427 | chr15:75834015-75834059                           | NM_001168253:5892      | Fam83h        | INSIDE                 | 1.108                                                        | 1.663                          | 484.95             | 806.25             | 1.843                          | 533.86             | 983.69             |
| A_68_P25375734 | chr7:108986819-108986865                          | NM_010567:-102         | Inpp1l        | PROMOTER               | 1.108                                                        | 1.635                          | 1188.56            | 1943.67            | 1.813                          | 982.06             | 1780.17            |
| A_68_P31937503 | chr19:7131378-7131422                             | NM_134147:143          | Macrodl       | INSIDE                 | 1.108                                                        | 1.892                          | 580.98             | 1099.28            | 2.096                          | 535.47             | 1122.49            |
| A_68_P21842270 | chr2:168396257-168396301                          | NM_001136073:19413     | Fatc2         | INSIDE                 | 1.108                                                        | 2.997                          | 1744.82            | 5229.33            | 3.321                          | 1309.91            | 4350.47            |
| A_68_P32140286 | chr19:45824101-45824145                           | NM_008723:-69          | Npm3          | PROMOTER               | 1.108                                                        | 2.303                          | 1914.06            | 4407.19            | 2.551                          | 1729.97            | 4412.58            |
| A_68_P31140482 | chr17:31701718-31701762                           | NM_016670:23           | Pknox1        | INSIDE                 | 1.108                                                        | 2.986                          | 1230.45            | 3674.08            | 3.308                          | 1067.44            | 3530.61            |
| A_68_P22149940 | chr3:54611394-54611438                            | NM_133231:297          | Rfxap         | INSIDE                 | 1.108                                                        | 4.069                          | 1021.37            | 4156.08            | 4.511                          | 888.33             | 4006.88            |
| A_68_P31940082 | chr19:7557921-7557965                             | NM_001003933:-163      | Rtn3          | PROMOTER               | 1.108                                                        | 1.473                          | 2339.36            | 3446.39            | 1.632                          | 1985.18            | 3240.41            |
| A_68_P21115505 | chr2:32306645-32306689                            | NM_001164357:324       | Slc25a25      | INSIDE                 | 1.108                                                        | 2.834                          | 648.75             | 1838.38            | 3.140                          | 581.61             | 1826.00            |
| A_68_P28170836 | chr11:118216495-118216539                         | NM_011594:209          | Timp2         | INSIDE                 | 1.108                                                        | 2.021                          | 1945.18            | 3931.72            | 2.240                          | 1600.28            | 3584.67            |
| A_68_P31156941 | chr17:35137890-35137934                           | NM_011690:61           | Vars          | INSIDE                 | 1.108                                                        | 2.185                          | 750.17             | 1639.09            | 2.422                          | 665.46             | 1611.67            |
| A_68_P32246512 | chrX:8905191-8905235                              | ENS MUST00000119858:22 |               | INSIDE                 | 1.108                                                        | 2.126                          | 874.93             | 1860.11            | 2.357                          | 580.97             | 1369.12            |
| A_68_P21755514 | chr2:153356022-153356066                          | NM_001134300:-337      | 8430427H17Rik | PROMOTER               | 1.107                                                        | 1.564                          | 959.22             | 1500.40            | 1.732                          | 866.99             | 1501.73            |
| A_68_P28853784 | chr13:17896191-17896235                           | NM_001081058:719       | Cdk13         | INSIDE                 | 1.107                                                        | 2.998                          | 479.27             | 1436.69            | 3.319                          | 441.55             | 1465.56            |
| A_68_P26132792 | chr8:107817484-107817528                          | NM_177788:2492         | Exoc3l        | INSIDE                 | 1.107                                                        | 1.911                          | 1111.55            | 2124.45            | 2.116                          | 938.78             | 1986.60            |
| A_68_P30720007 | chr16:44173365-44173409                           | NM_001029889:-123      | Gm608         | PROMOTER               | 1.107                                                        | 1.694                          | 742.62             | 1257.86            | 1.874                          | 696.52             | 1305.50            |
| A_68_P25025266 | chr7:29871013-29871057                            | NR_035489:-2321        | Mir1963       | PROMOTER               | 1.107                                                        | 2.833                          | 743.46             | 2106.55            | 3.137                          | 586.02             | 1838.43            |
| A_68_P32565872 | chrX:99045232-99045276                            | NM_001163610:531       | Nhs12         | INSIDE                 | 1.107                                                        | 2.059                          | 1487.49            | 3062.05            | 2.278                          | 906.03             | 2064.14            |
| A_68_P29058055 | chr13:54795009-54795053                           | NM_001146027:-5469     | Rnf44         | PROMOTER               | 1.107                                                        | 1.698                          | 982.67             | 1668.84            | 1.879                          | 968.95             | 1821.05            |
| A_68_P32319888 | chrX:34283671-34283715                            | NM_001085497:39        | Slc25a43      | INSIDE                 | 1.107                                                        | 2.735                          | 2843.65            | 7776.65            | 3.027                          | 1960.98            | 5935.99            |
| A_68_P29421304 | chr14:15535576-15535620                           | NM_001033270:60        | Slc4a7        | INSIDE                 | 1.107                                                        | 1.777                          | 711.88             | 1265.01            | 1.966                          | 590.96             | 1162.03            |
| A_68_P27850829 | chr11:61668825-61668869                           | NM_013881:-252         | Ulk2          | PROMOTER               | 1.107                                                        | 0.562                          | 1006.84            | 565.56             | 0.622                          | 860.57             | 535.23             |
| A_68_P30364132 | chr15:78893377-78893421                           | NM_144849:-109         | Ankrd54       | PROMOTER               | 1.106                                                        | 0.513                          | 1153.75            | 591.46             | 0.567                          | 1071.11            | 607.43             |
| A_68_P24925473 | chr6:145812067-145812111                          | NM_024469:1772         | Bhlhe41       | INSIDE                 | 1.106                                                        | 1.479                          | 662.10             | 979.16             | 1.636                          | 647.99             | 1060.21            |
| A_68_P29487613 | chr14:28321574-28321618                           | NM_177111:50           | Ccdc66        | INSIDE                 | 1.106                                                        | 1.514                          | 2246.13            | 3401.48            | 1.674                          | 2001.96            | 3351.59            |
| A_68_P26240288 | chr8:126039003-126039047                          | NM_001170976:331       | Dbndd1        | INSIDE                 | 1.106                                                        | 2.034                          | 1752.77            | 3565.88            | 2.249                          | 1507.31            | 3390.23            |
| A_68_P27285230 | chr10:80218002-80218046                           | NM_199322:74           | Dot11         | INSIDE                 | 1.106                                                        | 3.121                          | 897.86             | 2801.90            | 3.453                          | 920.91             | 3179.56            |
| A_68_P25505763 | chr7:134622752-134622796                          | NM_010183:-5960        | Fbrs          | PROMOTER               | 1.106                                                        | 1.964                          | 398.67             | 782.89             | 2.172                          | 328.57             | 713.71             |
| A_68_P21768525 | chr2:155768031-155768075                          | NM_008109:3048         | Gdf5          | INSIDE                 | 1.106                                                        | 1.522                          | 934.61             | 1422.75            | 1.684                          | 834.90             | 1405.67            |
| A_68_P26805690 | chr9:106788802-106788846                          | NM_175402:507          | Rbm15b        | INSIDE                 | 1.106                                                        | 0.424                          | 1238.52            | 525.38             | 0.469                          | 916.20             | 429.83             |
| A_68_P27282554 | chr10:79798280-79798324                           | NM_001204931:5413      | Reep6         | INSIDE                 | 1.106                                                        | 1.879                          | 771.59             | 1449.88            | 2.079                          | 716.98             | 1490.65            |
| A_68_P27841610 | chr11:60023907-60023951                           | NM_011480:10178        | Srebfl        | INSIDE                 | 1.106                                                        | 0.621                          | 1827.24            | 1134.82            | 0.687                          | 1503.79            | 1032.59            |
| A_68_P24769156 | chr6:115084797-115084841                          | NM_013681:-101         | Syn2          | PROMOTER               | 1.106                                                        | 2.022                          | 651.30             | 1317.15            | 2.238                          | 613.98             | 1373.89            |
| A_68_P25009105 | chr7:26010680-26010724                            | NM_175436:4233         | Zfp526        | INSIDE                 | 1.106                                                        | 2.461                          | 2457.13            | 6046.14            | 2.722                          | 1969.01            | 5358.73            |
| A_68_P26465230 | chr9:43829019-43829063                            |                        | Unknown       |                        | 1.106                                                        | 5.934                          | 5061.55            | 30033.83           | 6.563                          | 3710.44            | 24350.97           |

| ProbeName      | Target position of probe on CpG island microarray | TargetID               | GeneSymbol    | CpG island Description | Ratio of relative methylation (TiO <sub>2</sub> -NP/Vehicle) | Sham group                     |                    |                    | TiO <sub>2</sub> -H group      |                    |                    |
|----------------|---------------------------------------------------|------------------------|---------------|------------------------|--------------------------------------------------------------|--------------------------------|--------------------|--------------------|--------------------------------|--------------------|--------------------|
|                |                                                   |                        |               |                        |                                                              | Relative methylation (Cy5/Cy3) | Cy3 signal (Input) | Cy5 signal (MeDIP) | Relative methylation (Cy5/Cy3) | Cy3 signal (Input) | Cy5 signal (MeDIP) |
| A_68_P25008855 | chr7:25964863-25964907                            | X53654:547486          |               | INSIDE                 | 1.106                                                        | 2.800                          | 1755.03            | 4913.95            | 3.097                          | 1511.21            | 4680.03            |
| A_68_P21096084 | chr2:29108807-29108851                            | NR_029460:-315         | 6530402F18Rik | PROMOTER               | 1.105                                                        | 1.540                          | 995.75             | 1533.33            | 1.702                          | 875.16             | 1489.28            |
| A_68_P24864545 | chr6:134933738-134933782                          | NM_001109914:1742      | Apold1        | INSIDE                 | 1.105                                                        | 2.109                          | 872.81             | 1840.91            | 2.331                          | 797.24             | 1858.36            |
| A_68_P22063090 | chr3:37247843-37247887                            | NM_008006:290          | Fgf2          | INSIDE                 | 1.105                                                        | 0.582                          | 1124.57            | 654.65             | 0.643                          | 966.51             | 621.79             |
| A_68_P20842598 | chr1:176433545-176433589                          | NM_019445:1611         | Fmn2          | INSIDE                 | 1.105                                                        | 1.845                          | 466.98             | 861.72             | 2.038                          | 446.33             | 909.67             |
| A_68_P23787823 | chr5:72092225-72092269                            | NM_008069:992          | Gabrb1        | INSIDE                 | 1.105                                                        | 1.907                          | 1544.31            | 2944.82            | 2.108                          | 1314.96            | 2771.47            |
| A_68_P21874504 | chr2:174124338-174124382                          | NM_201617:1001         | Gnas          | INSIDE                 | 1.105                                                        | 1.951                          | 1454.41            | 2837.99            | 2.157                          | 1281.48            | 2763.87            |
| A_68_P26443402 | chr9:40263578-40263622                            | NM_172768:-251         | Gramd1b       | PROMOTER               | 1.105                                                        | 1.678                          | 961.62             | 1613.64            | 1.854                          | 810.99             | 1503.22            |
| A_68_P29228407 | chr13:94073846-94073890                           | NM_011982:-581         | Homer1        | PROMOTER               | 1.105                                                        | 0.486                          | 1975.44            | 959.12             | 0.537                          | 1577.57            | 846.52             |
| A_68_P29284632 | chr13:104123896-104123940                         | NM_175171:654          | Mast4         | INSIDE                 | 1.105                                                        | 0.548                          | 1148.42            | 629.89             | 0.606                          | 952.70             | 577.30             |
| A_68_P27782070 | chr11:49057978-49058022                           | NM_001110149:-2978     | Mgat1         | PROMOTER               | 1.105                                                        | 1.640                          | 1394.95            | 2287.59            | 1.812                          | 1127.48            | 2043.39            |
| A_68_P24538896 | chr6:71858733-71858777                            | NM_027275:2            | Ptcd3         | INSIDE                 | 1.105                                                        | 1.680                          | 550.76             | 925.12             | 1.855                          | 423.21             | 785.21             |
| A_68_P30012299 | chr15:10644337-10644381                           | NM_030690:-1063        | Rai14         | PROMOTER               | 1.105                                                        | 3.691                          | 417.90             | 1542.63            | 4.078                          | 397.96             | 1623.02            |
| A_68_P23359680 | chr4:140258068-140258112                          | NM_173867:703          | Rcc2          | INSIDE                 | 1.105                                                        | 1.865                          | 1277.22            | 2382.41            | 2.061                          | 1180.17            | 2432.10            |
| A_68_P31251409 | chr17:55622134-55622178                           | NM_172829:37142        | St6gal2       | INSIDE                 | 1.105                                                        | 1.806                          | 706.85             | 1276.39            | 1.995                          | 636.46             | 1269.98            |
| A_68_P26217895 | chr8:122625358-122625402                          | NM_133967:-8           | Zdhhc7        | PROMOTER               | 1.105                                                        | 5.049                          | 1780.50            | 8989.42            | 5.579                          | 1358.84            | 7581.56            |
| A_68_P21076584 | chr2:25994375-25994419                            | ENSMUST00000163836:-74 |               | PROMOTER               | 1.105                                                        | 3.597                          | 3267.88            | 11755.05           | 3.974                          | 2185.98            | 8686.31            |
| A_68_P26826442 | chr9:110782965-110783009                          | NM_001146060:161       | Als2cl        | INSIDE                 | 1.104                                                        | 1.915                          | 766.60             | 1468.20            | 2.113                          | 666.98             | 1409.64            |
| A_68_P24444443 | chr6:51421130-51421174                            | NM_007624:538          | Cbx3          | INSIDE                 | 1.104                                                        | 3.429                          | 744.19             | 2551.92            | 3.784                          | 652.98             | 2471.20            |
| A_68_P27294770 | chr10:82448262-82448306                           | NM_021439:43           | Chst11        | INSIDE                 | 1.104                                                        | 1.350                          | 1816.22            | 2452.11            | 1.491                          | 1474.67            | 2198.48            |
| A_68_P26864772 | chr9:118059149-118059193                          | NM_026442:144          | Cmc1          | INSIDE                 | 1.104                                                        | 1.605                          | 826.23             | 1326.09            | 1.772                          | 748.09             | 1325.65            |
| A_68_P31378939 | chr17:80115332-80115376                           | NM_009994:-973         | Cyp1b1        | PROMOTER               | 1.104                                                        | 2.163                          | 414.69             | 897.11             | 2.388                          | 331.30             | 791.21             |
| A_68_P32054106 | chr19:29722522-29722566                           | NM_001081213:366       | Ermp1         | INSIDE                 | 1.104                                                        | 1.684                          | 908.11             | 1528.86            | 1.858                          | 782.43             | 1453.68            |
| A_68_P29671483 | chr14:65695129-65695173                           | NM_018788:21793        | Extl3         | INSIDE                 | 1.104                                                        | 1.641                          | 779.48             | 1279.35            | 1.813                          | 745.01             | 1350.49            |
| A_68_P30925475 | chr16:84774232-84774276                           | NM_023844:-113         | Jam2          | PROMOTER               | 1.104                                                        | 2.066                          | 9365.24            | 19347.40           | 2.280                          | 6895.73            | 15721.68           |
| A_68_P31863476 | chr18:80492765-80492809                           | NM_001190373:68207     | Keng2         | INSIDE                 | 1.104                                                        | 1.948                          | 911.09             | 1775.10            | 2.150                          | 774.58             | 1665.38            |
| A_68_P20799112 | chr1:168168830-168168874                          | NM_175296:23           | Mael          | INSIDE                 | 1.104                                                        | 2.957                          | 858.62             | 2538.82            | 3.265                          | 785.52             | 2564.93            |
| A_68_P23278937 | chr4:125911565-125911609                          | NM_001145970:21977     | Mtap7d1       | INSIDE                 | 1.104                                                        | 2.305                          | 1298.98            | 2994.22            | 2.544                          | 973.72             | 2476.84            |
| A_68_P31110189 | chr17:26568886-26568930                           | NM_001081656:16999     | Neur1b        | INSIDE                 | 1.104                                                        | 2.048                          | 2086.40            | 4272.27            | 2.261                          | 1670.55            | 3777.10            |
| A_68_P21070359 | chr2:25036616-25036660                            | NM_025980:361          | Nrarp         | INSIDE                 | 1.104                                                        | 2.327                          | 345.04             | 802.90             | 2.570                          | 281.12             | 722.45             |
| A_68_P32114045 | chr19:41338252-41338296                           | NM_133352:220          | Tm9sf3        | INSIDE                 | 1.104                                                        | 2.466                          | 1610.59            | 3971.51            | 2.723                          | 1259.07            | 3428.79            |
| A_68_P30572940 | chr16:17276845-17276889                           | NM_177473:474          | Tmem191c      | INSIDE                 | 1.104                                                        | 1.855                          | 1979.74            | 3671.82            | 2.048                          | 1850.86            | 3791.39            |
| A_68_P24786876 | chr6:118405064-118405108                          | NM_028335:438          | Zfp248        | INSIDE                 | 1.104                                                        | 1.709                          | 3107.39            | 5310.41            | 1.886                          | 2581.80            | 4868.97            |
| A_68_P25008234 | chr7:25862568-25862612                            | NM_175477:326          | Zfp574        | INSIDE                 | 1.104                                                        | 1.873                          | 12504.21           | 23422.91           | 2.068                          | 8698.07            | 17990.66           |
| A_68_P32462526 | chrX:70667546-70667590                            | NM_009566:11127        | Zfp92         | INSIDE                 | 1.104                                                        | 1.759                          | 1280.97            | 2252.95            | 1.941                          | 667.88             | 1296.26            |
| A_68_P24058182 | chr5:124357285-124357329                          | NM_026603:23           | Denr          | INSIDE                 | 1.103                                                        | 2.189                          | 1582.48            | 3463.38            | 2.415                          | 1266.48            | 3058.66            |
| A_68_P20850632 | chr1:177810893-177810937                          | NM_012012:6            | Exo1          | INSIDE                 | 1.103                                                        | 1.842                          | 1017.41            | 1874.43            | 2.033                          | 796.67             | 1619.51            |
| A_68_P28187038 | chr11:120686207-120686251                         | NM_007988:-367         | Fasn          | PROMOTER               | 1.103                                                        | 0.548                          | 1132.34            | 620.47             | 0.605                          | 938.16             | 567.18             |
| A_68_P24172328 | chr5:148001784-148001828                          | NM_008178:1535         | Gsx1          | INSIDE                 | 1.103                                                        | 1.456                          | 2049.90            | 2985.10            | 1.607                          | 1790.45            | 2876.73            |
| A_68_P23340287 | chr4:137074439-137074483                          | NM_008305:49743        | Hspg2         | INSIDE                 | 1.103                                                        | 4.064                          | 2019.25            | 8206.19            | 4.481                          | 1749.57            | 7840.43            |
| A_68_P21840417 | chr2:168094618-168094662                          | NM_001081134:191       | Keng1         | INSIDE                 | 1.103                                                        | 2.324                          | 1081.48            | 2513.03            | 2.562                          | 913.04             | 2339.52            |
| A_68_P25349938 | chr7:104480832-104480876                          | NM_001039039:22        | Kctd21        | INSIDE                 | 1.103                                                        | 3.201                          | 1944.26            | 6224.40            | 3.531                          | 1557.09            | 5498.11            |
| A_68_P23756015 | chr5:65770784-65770828                            | NM_031180:31157        | Klb           | INSIDE                 | 1.103                                                        | 1.735                          | 519.81             | 901.72             | 1.913                          | 413.66             | 791.47             |
| A_68_P27284038 | chr10:80031829-80031873                           | NM_078477:8191         | Klfl6         | INSIDE                 | 1.103                                                        | 3.309                          | 1243.59            | 4115.42            | 3.649                          | 1061.80            | 3874.02            |
| A_68_P31669144 | chr18:44971731-44971775                           | NM_001085373:84        | Mcc           | INSIDE                 | 1.103                                                        | 2.227                          | 1592.36            | 3546.67            | 2.456                          | 1375.47            | 3378.05            |
| A_68_P22422565 | chr3:109945185-109945229                          | NM_001163348:1184      | Ntng1         | INSIDE                 | 1.103                                                        | 3.408                          | 1935.24            | 6595.25            | 3.759                          | 1599.62            | 6012.72            |
| A_68_P31626662 | chr18:37166261-37166305                           | NM_009960:-4229        | Pcdha11       | PROMOTER               | 1.103                                                        | 1.866                          | 459.18             | 856.91             | 2.058                          | 466.83             | 960.53             |
| A_68_P21587820 | chr2:122564356-122564400                          | NM_019788:138          | Pldn          | INSIDE                 | 1.103                                                        | 2.086                          | 722.62             | 1507.71            | 2.302                          | 687.50             | 1582.35            |
| A_68_P20770872 | chr1:163180941-163180985                          | NM_007453:335          | Prdx6         | INSIDE                 | 1.103                                                        | 2.159                          | 804.81             | 1737.89            | 2.381                          | 686.81             | 1635.46            |
| A_68_P22933503 | chr4:55362594-55362638                            | NM_009011:-297         | Rad23b        | PROMOTER               | 1.103                                                        | 2.309                          | 1582.80            | 3655.15            | 2.547                          | 1407.10            | 3583.73            |
| A_68_P26533944 | chr9:55889943-55889987                            | NM_011992:313          | Ren2          | INSIDE                 | 1.103                                                        | 1.907                          | 494.90             | 943.62             | 2.104                          | 460.62             | 969.11             |

| ProbeName      | Target position of probe on CpG island microarray | TargetID          | GeneSymbol | CpG island Description | Ratio of relative methylation (TiO <sub>2</sub> -NP/Vehicle) | Sham group                     |                    |                    | TiO <sub>2</sub> -H group      |                    |                    |
|----------------|---------------------------------------------------|-------------------|------------|------------------------|--------------------------------------------------------------|--------------------------------|--------------------|--------------------|--------------------------------|--------------------|--------------------|
|                |                                                   |                   |            |                        |                                                              | Relative methylation (Cy5/Cy3) | Cy3 signal (Input) | Cy5 signal (MeDIP) | Relative methylation (Cy5/Cy3) | Cy3 signal (Input) | Cy5 signal (MeDIP) |
| A_68_P32957490 | chr17:8138877-8138921                             | NM_025789:420     | Rsp3a      | INSIDE                 | 1.103                                                        | 2.242                          | 852.02             | 1910.14            | 2.472                          | 726.98             | 1797.16            |
| A_68_P28535257 | chr12:74145983-74146027                           | NM_009189:1695    | Six1       | INSIDE                 | 1.103                                                        | 2.991                          | 754.03             | 2255.40            | 3.300                          | 687.27             | 2267.71            |
| A_68_P23322289 | chr4:133899035-133899079                          | NM_001039677:72   | Slc30a2    | INSIDE                 | 1.103                                                        | 1.516                          | 2312.37            | 3505.26            | 1.672                          | 1969.05            | 3292.32            |
| A_68_P28554953 | chr12:77707492-77707536                           | NM_013675:104020  | Spn1b      | INSIDE                 | 1.103                                                        | 2.183                          | 249.54             | 544.80             | 2.408                          | 247.06             | 594.86             |
| A_68_P28054165 | chr11:97913498-97913542                           | NM_146028:1256    | Stac2      | INSIDE                 | 1.103                                                        | 2.089                          | 1059.53            | 2213.23            | 2.304                          | 949.59             | 2188.28            |
| A_68_P32264675 | chrX:12648851-12648895                            | NM_009481:249     | Usp9x      | INSIDE                 | 1.103                                                        | 1.647                          | 658.30             | 1083.97            | 1.817                          | 383.54             | 696.87             |
| A_68_P30402004 | chr15:85476715-85476759                           | AK037366:-9359    |            | PROMOTER               | 1.103                                                        | 1.928                          | 1119.56            | 2158.66            | 2.126                          | 969.47             | 2061.56            |
| A_68_P22502227 | chr3:126066719-126066763                          | NM_173451:-29     | Arsj       | PROMOTER               | 1.102                                                        | 1.933                          | 303.83             | 587.19             | 2.130                          | 249.28             | 531.08             |
| A_68_P29335931 | chr13:113442236-113442280                         | NM_001145885:260  | Ddx4       | INSIDE                 | 1.102                                                        | 3.403                          | 910.20             | 3097.74            | 3.751                          | 786.67             | 2950.92            |
| A_68_P23336931 | chr4:136501821-136501865                          | NM_007939:10889   | Epha8      | INSIDE                 | 1.102                                                        | 2.063                          | 1072.71            | 2213.36            | 2.274                          | 887.48             | 2018.32            |
| A_68_P29034745 | chr13:51941936-51941980                           | NM_011817:-85     | Gadd45g    | PROMOTER               | 1.102                                                        | 1.681                          | 652.55             | 1096.73            | 1.852                          | 576.13             | 1066.84            |
| A_68_P28431901 | chr12:52930414-52930458                           | NM_144788:87      | Hectd1     | INSIDE                 | 1.102                                                        | 1.880                          | 886.21             | 1665.80            | 2.072                          | 709.03             | 1468.91            |
| A_68_P31927056 | chr19:5118110-5118154                             | NM_008451:276     | Klc2       | INSIDE                 | 1.102                                                        | 0.614                          | 2991.61            | 1836.84            | 0.677                          | 2461.05            | 1665.73            |
| A_68_P23547785 | chr5:25003901-25003945                            | NM_001081383:679  | Mil3       | INSIDE                 | 1.102                                                        | 1.838                          | 799.20             | 1468.63            | 2.025                          | 717.99             | 1454.21            |
| A_68_P31442548 | chr17:91487890-91487934                           | NM_020252:4230    | Nrxn1      | INSIDE                 | 1.102                                                        | 1.986                          | 552.40             | 1096.84            | 2.188                          | 520.29             | 1138.44            |
| A_68_P22031104 | chr3:30868422-30868466                            | NM_001165954:-107 | Phc3       | PROMOTER               | 1.102                                                        | 1.461                          | 1841.08            | 2689.15            | 1.610                          | 1606.19            | 2586.35            |
| A_68_P24772420 | chr6:115626105-115626149                          | NM_029780:527     | Raf1       | INSIDE                 | 1.102                                                        | 7.291                          | 363.41             | 2649.50            | 8.034                          | 348.64             | 2801.01            |
| A_68_P23364274 | chr4:141028926-141028970                          | NM_019763:65564   | Spen       | INSIDE                 | 1.102                                                        | 2.785                          | 869.68             | 2421.76            | 3.069                          | 680.25             | 2087.65            |
| A_68_P26770338 | chr9:100471400-100471444                          | NM_001101483:82   | Tmem22     | INSIDE                 | 1.102                                                        | 1.946                          | 712.95             | 1387.47            | 2.144                          | 671.46             | 1439.48            |
| A_68_P25957477 | chr8:74082522-74082566                            | NM_001100462:226  | Tmem221    | INSIDE                 | 1.102                                                        | 1.820                          | 461.17             | 839.50             | 2.006                          | 469.93             | 942.64             |
| A_68_P25670555 | chr8:13785828-13785872                            | NM_025924:236     | Upf3a      | INSIDE                 | 1.102                                                        | 2.531                          | 970.82             | 2457.33            | 2.789                          | 760.60             | 2121.07            |
| A_68_P28611612 | chr12:88030123-88030167                           | NM_177354:10495   | Vash1      | INSIDE                 | 1.102                                                        | 1.790                          | 383.02             | 685.50             | 1.972                          | 296.87             | 585.30             |
| A_68_P21780089 | chr2:157770092-157770136                          | NM_198627:29726   | Vstm21     | INSIDE                 | 1.102                                                        | 1.909                          | 897.85             | 1713.98            | 2.103                          | 776.45             | 1632.71            |
| A_68_P32959961 | A_68_P32959961                                    | A_68_P32959961    | Unknown    |                        | 1.102                                                        | 3.353                          | 574.19             | 1925.52            | 3.696                          | 463.32             | 1712.28            |
| A_68_P24980670 | chr7:16871649-16871693                            | NM_172297:-1662   | Ccdc9      | PROMOTER               | 1.101                                                        | 6.756                          | 15064.41           | 101777.60          | 7.440                          | 9753.59            | 72563.67           |
| A_68_P21425707 | chr2:91805748-91805792                            | NM_138306:-2050   | Dgkz       | PROMOTER               | 1.101                                                        | 1.803                          | 482.99             | 870.86             | 1.986                          | 437.06             | 867.93             |
| A_68_P28158451 | chr11:116144755-116144799                         | NM_010254:2524    | Galr2      | INSIDE                 | 1.101                                                        | 1.881                          | 693.52             | 1304.57            | 2.072                          | 601.76             | 1246.70            |
| A_68_P30650845 | chr16:32079162-32079206                           | NM_177326:175     | Pak2       | INSIDE                 | 1.101                                                        | 1.803                          | 410.07             | 739.45             | 1.985                          | 315.90             | 627.13             |
| A_68_P29360872 | chr13:117813736-117813780                         | NM_001081009:565  | Parp8      | INSIDE                 | 1.101                                                        | 1.705                          | 973.67             | 1660.05            | 1.877                          | 875.74             | 1643.90            |
| A_68_P23152968 | chr4:100741662-100741706                          | NM_183024:42      | Raver2     | INSIDE                 | 1.101                                                        | 2.029                          | 550.37             | 1116.75            | 2.235                          | 498.47             | 1114.08            |
| A_68_P30960424 | chr16:91011840-91011884                           | NM_001164483:-309 | Synj1      | PROMOTER               | 1.101                                                        | 1.603                          | 906.67             | 1453.61            | 1.766                          | 729.98             | 1288.90            |
| A_68_P27850820 | chr11:61667944-61667988                           | NM_013881:628     | Ulk2       | INSIDE                 | 1.101                                                        | 2.688                          | 914.17             | 2457.72            | 2.961                          | 889.66             | 2634.44            |
| A_68_P31323666 | chr17:69732894-69732938                           | NM_009547:-401    | Zfp161     | PROMOTER               | 1.101                                                        | 2.115                          | 650.27             | 1375.15            | 2.328                          | 598.19             | 1392.54            |
| A_68_P30501994 | chr15:102916894-102916938                         | AF216290:299350   |            | INSIDE                 | 1.101                                                        | 1.419                          | 1289.12            | 1829.43            | 1.563                          | 1012.20            | 1581.61            |
| A_68_P26080208 | chr8:97437258-97437302                            | NM_001033533:4718 | Ccdc102a   | INSIDE                 | 1.100                                                        | 1.828                          | 1651.99            | 3020.05            | 2.011                          | 1302.23            | 2618.49            |
| A_68_P23609088 | chr5:37086702-37086746                            | NM_001081232:484  | D5Erd579c  | INSIDE                 | 1.100                                                        | 2.415                          | 917.45             | 2215.42            | 2.656                          | 1094.76            | 2908.15            |
| A_68_P28003591 | chr11:88921871-88921915                           | NM_019505:170     | Dgke       | INSIDE                 | 1.100                                                        | 2.485                          | 910.49             | 2262.26            | 2.732                          | 793.91             | 2169.23            |
| A_68_P23203770 | chr4:109654911-109654955                          | NM_172296:4303    | Dmrt2      | INSIDE                 | 1.100                                                        | 1.666                          | 1054.18            | 1755.89            | 1.832                          | 918.82             | 1683.71            |
| A_68_P21601164 | chr2:125073520-125073564                          | NM_023595:292     | Dut        | INSIDE                 | 1.100                                                        | 0.462                          | 1115.63            | 515.10             | 0.508                          | 843.03             | 428.12             |
| A_68_P23577614 | chr5:31598329-31598373                            | NM_022424:-100    | Fndc4      | DIVERGENT_PROMOTER     | 1.100                                                        | 1.478                          | 2212.63            | 3271.36            | 1.626                          | 2122.88            | 3452.10            |
| A_68_P25098810 | chr7:53651744-53651788                            | NM_008421:-71     | Kenc1      | PROMOTER               | 1.100                                                        | 1.496                          | 739.26             | 1105.94            | 1.646                          | 673.61             | 1108.57            |
| A_68_P31123766 | chr17:28828497-28828541                           | NM_001168513:-994 | Mapk14     | PROMOTER               | 1.100                                                        | 2.326                          | 351.56             | 817.65             | 2.558                          | 328.17             | 839.55             |
| A_68_P20648918 | chr11:138845713-138845757                         | NM_001159769:4473 | Nr5a2      | INSIDE                 | 1.100                                                        | 3.578                          | 750.05             | 2683.52            | 3.936                          | 640.73             | 2521.92            |
| A_68_P25089776 | chr7:52119038-52119082                            | NM_133949:6098    | Ptov1      | INSIDE                 | 1.100                                                        | 2.535                          | 3159.37            | 8008.01            | 2.788                          | 2292.23            | 6390.84            |
| A_68_P26823557 | chr9:1110310713-1110310757                        | NM_001081043:-20  | Ptpn23     | PROMOTER               | 1.100                                                        | 1.495                          | 2176.48            | 3253.83            | 1.644                          | 1839.93            | 3024.47            |
| A_68_P21217116 | chr2:51928627-51928671                            | NM_175238:292     | Rif1       | INSIDE                 | 1.100                                                        | 1.938                          | 608.48             | 1179.52            | 2.132                          | 568.79             | 1212.67            |
| A_68_P21116406 | chr2:32470512-32470556                            | NM_001025310:8054 | St6galnac6 | INSIDE                 | 1.100                                                        | 2.330                          | 316.04             | 736.39             | 2.563                          | 277.08             | 710.03             |
| A_68_P31152725 | chr17:34341728-34341772                           | NM_011530:327     | Tap2       | INSIDE                 | 1.100                                                        | 1.508                          | 3651.15            | 5504.36            | 1.659                          | 2731.87            | 4532.18            |
| A_68_P20303907 | chr1:66724032-66724076                            | NM_175510:209034  | Unc80      | INSIDE                 | 1.100                                                        | 1.633                          | 876.45             | 1431.61            | 1.797                          | 772.37             | 1388.03            |
| A_68_P31092362 | chr17:23694847-23694891                           | NM_001033496:6325 | Zfp213     | INSIDE                 | 1.100                                                        | 2.518                          | 705.98             | 1778.01            | 2.770                          | 576.10             | 1595.99            |
| A_68_P24818156 | chr6:124959237-124959281                          | NM_175557:-564    | Zfp384     | PROMOTER               | 1.100                                                        | 2.394                          | 1042.11            | 2495.18            | 2.634                          | 951.09             | 2505.19            |

| ProbeName      | Target position of probe on CpG island microarray | TargetID                 | GeneSymbol    | CpG island Description | Ratio of relative methylation (TiO <sub>2</sub> -NP/Vehicle) | Sham group                     |                    |                    | TiO <sub>2</sub> -H group      |                    |                    |
|----------------|---------------------------------------------------|--------------------------|---------------|------------------------|--------------------------------------------------------------|--------------------------------|--------------------|--------------------|--------------------------------|--------------------|--------------------|
|                |                                                   |                          |               |                        |                                                              | Relative methylation (Cy5/Cy3) | Cy3 signal (Input) | Cy5 signal (MeDIP) | Relative methylation (Cy5/Cy3) | Cy3 signal (Input) | Cy5 signal (MeDIP) |
| A_68_P31940131 | chr19:7569296-7569340                             | NM_146091:391            | Atf3          | INSIDE                 | 1.099                                                        | 3.962                          | 334.35             | 1324.64            | 4.353                          | 306.89             | 1335.74            |
| A_68_P25354429 | chr7:105342798-105342842                          | NM_001081167:5165        | B3gnt6        | INSIDE                 | 1.099                                                        | 3.040                          | 598.15             | 1818.66            | 3.343                          | 619.13             | 2069.54            |
| A_68_P28001993 | chr1:188580214-88580258                           | NR_038058:280            | C030037D09Rik | INSIDE                 | 1.099                                                        | 1.666                          | 2176.43            | 3626.51            | 1.831                          | 1482.29            | 2713.92            |
| A_68_P23196907 | chr4:108292428-108292472                          | NM_177045:-110           | Ce2d1b        | PROMOTER               | 1.099                                                        | 1.563                          | 2440.59            | 3813.62            | 1.717                          | 2187.95            | 3756.16            |
| A_68_P30368454 | chr15:79604585-79604629                           | NM_017470:291            | Dnalc4        | INSIDE                 | 1.099                                                        | 1.521                          | 3573.91            | 5436.54            | 1.671                          | 2808.06            | 4692.63            |
| A_68_P23927392 | chr5:100468747-100468791                          | NM_001163035:-244        | Enoph1        | DIVERGENT_PROMOTER     | 1.099                                                        | 0.360                          | 2153.59            | 775.41             | 0.396                          | 1821.03            | 720.89             |
| A_68_P24795427 | chr6:119797721-119797765                          | NM_053204:426            | Erc1          | INSIDE                 | 1.099                                                        | 1.919                          | 2615.82            | 5019.27            | 2.109                          | 2223.30            | 4689.08            |
| A_68_P29671484 | chr14:65695263-65695307                           | NM_018788:21659          | Extl3         | INSIDE                 | 1.099                                                        | 2.747                          | 2218.76            | 6093.92            | 3.019                          | 1738.86            | 5249.36            |
| A_68_P22384167 | chr3:102862328-102862372                          | NM_010937:143            | Nras          | INSIDE                 | 1.099                                                        | 1.740                          | 700.71             | 1219.30            | 1.912                          | 520.51             | 995.42             |
| A_68_P24053562 | chr5:123479427-123479471                          | NM_175423:14366          | Orai1         | INSIDE                 | 1.099                                                        | 2.923                          | 1394.74            | 4077.28            | 3.213                          | 1101.22            | 3538.22            |
| A_68_P30380707 | chr15:81790992-81791036                           | NM_013872:283            | Pmm1          | INSIDE                 | 1.099                                                        | 1.900                          | 2072.56            | 3936.86            | 2.088                          | 1585.63            | 3310.85            |
| A_68_P28854348 | chr13:18035877-18035921                           | NM_019491:153            | Rala          | INSIDE                 | 1.099                                                        | 2.752                          | 261.74             | 720.37             | 3.026                          | 245.21             | 741.94             |
| A_68_P29507577 | chr14:31528572-31528616                           | NM_001166532:-206        | Sfmbt1        | PROMOTER               | 1.099                                                        | 2.466                          | 795.22             | 1960.94            | 2.709                          | 752.75             | 2039.13            |
| A_68_P20370951 | chr1:78306769-78306813                            | NM_001004173:-130        | Sgpp2         | PROMOTER               | 1.099                                                        | 2.099                          | 2689.27            | 5645.51            | 2.308                          | 2342.46            | 5405.30            |
| A_68_P31201839 | chr17:45701335-45701379                           | NM_028662:256            | Slc35b2       | INSIDE                 | 1.099                                                        | 2.148                          | 1556.77            | 3343.46            | 2.360                          | 1346.47            | 3177.94            |
| A_68_P25102242 | chr7:54213694-54213738                            | NM_001040695:172         | Uevld         | INSIDE                 | 1.099                                                        | 1.382                          | 3548.99            | 4905.88            | 1.519                          | 2749.59            | 4175.48            |
| A_68_P27340460 | chr10:90644534-90644578                           | ENSMUST00000099357:-9797 |               | PROMOTER               | 1.099                                                        | 0.528                          | 1456.29            | 768.86             | 0.580                          | 1220.19            | 707.86             |
| A_68_P25083583 | chr7:50932042-50932086                            | NM_145582:4664           | Ctu1          | INSIDE                 | 1.098                                                        | 3.050                          | 1089.78            | 3324.31            | 3.348                          | 875.97             | 2932.86            |
| A_68_P24122083 | chr5:137041608-137041652                          | NM_198602:1645           | Cux1          | INSIDE                 | 1.098                                                        | 2.278                          | 1845.87            | 4204.99            | 2.500                          | 1407.34            | 3518.95            |
| A_68_P22194043 | chr3:63709285-63709329                            | NM_177856:24001          | E130311K13Rik | DOWNSTREAM             | 1.098                                                        | 2.201                          | 745.28             | 1640.29            | 2.416                          | 676.66             | 1635.08            |
| A_68_P21393859 | chr2:84499121-84499165                            | NM_001145100:-93         | Gm13718       | DIVERGENT_PROMOTER     | 1.098                                                        | 2.504                          | 1253.81            | 3139.02            | 2.749                          | 1100.49            | 3024.84            |
| A_68_P31055442 | chr17:13108620-13108664                           | NM_026310:315            | Mrp118        | INSIDE                 | 1.098                                                        | 1.658                          | 793.46             | 1315.49            | 1.821                          | 681.97             | 1241.58            |
| A_68_P25377736 | chr7:109371755-109371799                          | NM_145583:189            | Pgap2         | INSIDE                 | 1.098                                                        | 2.106                          | 2797.72            | 5893.33            | 2.313                          | 2369.32            | 5479.69            |
| A_68_P25586914 | chr7:148317021-148317066                          | NM_013782:-141           | Ptdss2        | PROMOTER               | 1.098                                                        | 1.819                          | 1844.35            | 3355.55            | 1.998                          | 1565.86            | 3269.24            |
| A_68_P23308458 | chr4:131375508-131375552                          | NM_001083119:18663       | Ptpru         | INSIDE                 | 1.098                                                        | 2.372                          | 760.89             | 1805.20            | 2.604                          | 660.89             | 1720.93            |
| A_68_P21077277 | chr2:26092977-26093024                            | NM_153559:-60            | Qsox2         | PROMOTER               | 1.098                                                        | 1.708                          | 10144.92           | 17331.42           | 1.876                          | 7141.09            | 13395.64           |
| A_68_P24622497 | chr6:88450007-88450051                            | NM_019685:34612          | Ruvb1l        | DOWNSTREAM             | 1.098                                                        | 1.850                          | 654.79             | 1211.43            | 2.031                          | 730.77             | 1484.45            |
| A_68_P30575812 | chr16:17806955-17806999                           | NM_153790:9602           | Scarf2        | INSIDE                 | 1.098                                                        | 2.817                          | 590.69             | 1663.81            | 3.093                          | 535.63             | 1656.69            |
| A_68_P28376736 | chr12:40860722-40860766                           | NM_001146196:71          | Scin          | INSIDE                 | 1.098                                                        | 0.421                          | 2229.60            | 938.53             | 0.462                          | 1878.47            | 868.56             |
| A_68_P22081032 | chr3:40512823-40512867                            | NM_178386:52             | Slc25a31      | INSIDE                 | 1.098                                                        | 1.842                          | 508.57             | 936.79             | 2.022                          | 413.76             | 836.71             |
| A_68_P21749134 | chr2:152224754-152224798                          | NM_011438:-994           | Sox12         | PROMOTER               | 1.098                                                        | 3.214                          | 1100.66            | 3537.74            | 3.530                          | 986.23             | 3481.83            |
| A_68_P25016990 | chr7:28157258-28157302                            | NM_001199235:22245       | Spnb4         | INSIDE                 | 1.098                                                        | 1.989                          | 877.29             | 1745.03            | 2.185                          | 763.84             | 1668.85            |
| A_68_P22774760 | chr4:21703216-21703260                            | NM_152825:-178           | Usp45         | DIVERGENT_PROMOTER     | 1.098                                                        | 0.492                          | 2362.77            | 1161.73            | 0.540                          | 1998.06            | 1079.15            |
| A_68_P23195052 | chr4:107890429-107890473                          | NM_001167936:77          | Zyg11a        | INSIDE                 | 1.098                                                        | 1.467                          | 1114.49            | 1634.49            | 1.611                          | 1005.88            | 1620.10            |
| A_68_P29072930 | chr13:58486645-58486689                           | NM_027335:-80            | 2210016F16Rik | PROMOTER               | 1.097                                                        | 2.187                          | 459.36             | 1004.70            | 2.398                          | 382.48             | 917.31             |
| A_68_P25657382 | chr8:11758359-11758403                            | NM_001113518:51          | Arhgef7       | INSIDE                 | 1.097                                                        | 0.424                          | 1608.98            | 682.35             | 0.465                          | 1259.32            | 586.04             |
| A_68_P28853785 | chr13:17896465-17896509                           | NM_001081058:445         | Cdk13         | INSIDE                 | 1.097                                                        | 2.067                          | 838.02             | 1732.39            | 2.267                          | 825.78             | 1872.27            |
| A_68_P21907946 | chr2:180763743-180763787                          | NM_015730:10118          | Chrna4        | INSIDE                 | 1.097                                                        | 4.949                          | 2893.12            | 14319.29           | 5.430                          | 1954.99            | 10615.68           |
| A_68_P25565163 | chr7:144500856-144500900                          | NM_001113414:5250        | Ebf3          | INSIDE                 | 1.097                                                        | 1.600                          | 496.65             | 794.46             | 1.754                          | 523.84             | 918.83             |
| A_68_P30682953 | chr16:37868211-37868255                           | NM_177093:-253           | Lrrc58        | PROMOTER               | 1.097                                                        | 1.571                          | 509.51             | 800.26             | 1.723                          | 491.48             | 846.94             |
| A_68_P29446633 | chr14:21213077-21213121                           | NM_025440:-321           | Mrps16        | PROMOTER               | 1.097                                                        | 1.644                          | 1409.37            | 2316.45            | 1.803                          | 1079.66            | 1947.07            |
| A_68_P20727255 | chr1:155396749-155396793                          | NM_028749:74             | Npl           | INSIDE                 | 1.097                                                        | 2.016                          | 1154.50            | 2327.54            | 2.211                          | 972.67             | 2150.41            |
| A_68_P32089882 | chr19:36484156-36484200                           | NM_029508:30622          | Pegf5         | INSIDE                 | 1.097                                                        | 2.651                          | 3345.17            | 8868.63            | 2.907                          | 2595.90            | 7547.26            |
| A_68_P29585964 | chr14:48740853-48740897                           | NM_033602:331            | Peli2         | INSIDE                 | 1.097                                                        | 1.487                          | 4036.71            | 6001.97            | 1.631                          | 3043.00            | 4963.55            |
| A_68_P26977747 | chr10:18564707-18564751                           | NM_022032:-148           | Perp          | PROMOTER               | 1.097                                                        | 2.292                          | 1862.10            | 4267.04            | 2.513                          | 1552.44            | 3901.69            |
| A_68_P24983338 | chr7:17396479-17396523                            | NM_001039878:-4737       | Strn4         | PROMOTER               | 1.097                                                        | 1.683                          | 1000.44            | 1683.82            | 1.847                          | 929.11             | 1715.74            |
| A_68_P26037060 | chr8:90304857-90304901                            | NM_033327:178616         | Zfp423        | INSIDE                 | 1.097                                                        | 1.717                          | 665.72             | 1143.01            | 1.883                          | 532.01             | 1002.04            |
| A_68_P26974631 | chr10:18038563-18038607                           |                          | Unknown       |                        | 1.097                                                        | 2.785                          | 371.63             | 1034.90            | 3.054                          | 372.92             | 1139.01            |
| A_68_P27630019 | chr11:20012621-20012665                           | NM_146243:312            | Actr2         | INSIDE                 | 1.096                                                        | 1.651                          | 700.88             | 1156.98            | 1.810                          | 707.93             | 1281.04            |
| A_68_P27649727 | chr11:24064666-24064712                           | NM_001159290:83994       | Bcl11a        | INSIDE                 | 1.096                                                        | 2.574                          | 695.18             | 1789.56            | 2.822                          | 572.83             | 1616.49            |
| A_68_P28724520 | chr12:109154600-109154644                         | NM_001079883:87002       | Bcl11b        | INSIDE                 | 1.096                                                        | 2.780                          | 925.70             | 2573.37            | 3.048                          | 766.16             | 2335.01            |

| ProbeName      | Target position of probe on CpG island microarray | TargetID                | GeneSymbol    | CpG island Description | Ratio of relative methylation (TiO <sub>2</sub> -NP/Vehicle) | Sham group                     |                    |                    | TiO <sub>2</sub> -H group      |                    |                    |
|----------------|---------------------------------------------------|-------------------------|---------------|------------------------|--------------------------------------------------------------|--------------------------------|--------------------|--------------------|--------------------------------|--------------------|--------------------|
|                |                                                   |                         |               |                        |                                                              | Relative methylation (Cy5/Cy3) | Cy3 signal (Input) | Cy5 signal (MeDIP) | Relative methylation (Cy5/Cy3) | Cy3 signal (Input) | Cy5 signal (MeDIP) |
| A_68_P28175451 | chr11:118902630-118902674                         | NM_013926:-425          | Cbx8          | PROMOTER               | 1.096                                                        | 1.609                          | 1004.31            | 1615.95            | 1.763                          | 885.39             | 1561.05            |
| A_68_P22058857 | chr3:36470723-36470767                            | NM_009828:174           | Cena2         | INSIDE                 | 1.096                                                        | 2.081                          | 370.59             | 771.15             | 2.280                          | 364.34             | 830.64             |
| A_68_P27543829 | chr10:128347422-128347466                         | NM_007653:523           | Cd63          | INSIDE                 | 1.096                                                        | 1.574                          | 2072.01            | 3262.23            | 1.726                          | 1611.29            | 2780.36            |
| A_68_P26078038 | chr8:97056657-97056701                            | NM_153507:-249          | Cpne2         | PROMOTER               | 1.096                                                        | 2.363                          | 813.79             | 1922.83            | 2.589                          | 798.90             | 2068.14            |
| A_68_P28540763 | chr12:75050763-75050807                           | NM_010431:41931         | Hif1a         | DOWNSTREAM             | 1.096                                                        | 1.718                          | 901.34             | 1548.12            | 1.882                          | 797.19             | 1500.56            |
| A_68_P23295050 | chr4:128798908-128798952                          | NM_010471:-395          | Hpca          | PROMOTER               | 1.096                                                        | 5.900                          | 2693.09            | 15889.35           | 6.465                          | 2172.96            | 14048.83           |
| A_68_P28445676 | chr12:55169720-55169764                           | NM_013780:820079        | Npas3         | INSIDE                 | 1.096                                                        | 1.652                          | 1977.23            | 3265.80            | 1.811                          | 1565.36            | 2834.71            |
| A_68_P32508786 | chrX:83437353-83437397                            | NM_007430:261           | Nr0b1         | INSIDE                 | 1.096                                                        | 1.836                          | 787.54             | 1446.03            | 2.012                          | 488.35             | 982.73             |
| A_68_P27980113 | chr11:84693476-84693520                           | NM_027388:199           | Pigw          | INSIDE                 | 1.096                                                        | 2.400                          | 890.02             | 2135.74            | 2.630                          | 823.70             | 2166.42            |
| A_68_P25972618 | chr8:77737845-77737889                            | NM_029182:24            | Rasd2         | INSIDE                 | 1.096                                                        | 3.637                          | 1104.94            | 4018.87            | 3.986                          | 966.16             | 3851.25            |
| A_68_P30348905 | chr15:76353796-76353840                           | NM_130893:-1259         | Scrt1         | PROMOTER               | 1.096                                                        | 0.649                          | 2464.40            | 1599.58            | 0.711                          | 1953.71            | 1389.45            |
| A_68_P22342629 | chr3:94976833-94976877                            | NM_011351:8559          | Sema6c        | INSIDE                 | 1.096                                                        | 2.654                          | 387.34             | 1027.96            | 2.909                          | 383.05             | 1114.28            |
| A_68_P25962758 | chr8:75274038-75274082                            | NM_009188:26874         | Sin3b         | INSIDE                 | 1.096                                                        | 2.999                          | 195.17             | 585.41             | 3.287                          | 182.85             | 601.09             |
| A_68_P27911315 | chr11:72224926-72224970                           | NM_177776:267           | Smtnl2        | INSIDE                 | 1.096                                                        | 1.502                          | 625.39             | 939.38             | 1.646                          | 533.55             | 878.30             |
| A_68_P22383503 | chr3:102739831-102739875                          | NM_011516:171           | Sycp1         | INSIDE                 | 1.096                                                        | 1.980                          | 389.50             | 771.28             | 2.171                          | 393.12             | 853.45             |
| A_68_P32241861 | chrX:7706354-7706398                              | NR_029428:3597          | Wdr13         | INSIDE                 | 1.096                                                        | 2.726                          | 708.04             | 1930.07            | 2.987                          | 452.32             | 1351.18            |
| A_68_P25735820 | chr8:28090231-28090275                            | NM_001101502:2445       | Zfp703        | INSIDE                 | 1.096                                                        | 2.315                          | 1698.88            | 3932.82            | 2.536                          | 1461.03            | 3705.63            |
| A_68_P22609446 | chr3:145239414-145239458                          | NM_001081094:265        | Znhit6        | INSIDE                 | 1.096                                                        | 1.863                          | 3505.74            | 6532.24            | 2.042                          | 2613.34            | 5337.02            |
| A_68_P28751871 | chr12:113931919-113931963                         | AK028601:-159           |               | PROMOTER               | 1.096                                                        | 1.846                          | 608.14             | 1122.38            | 2.023                          | 560.09             | 1132.81            |
| A_68_P26766898 | chr9:99847864-99847908                            | ENSMUST00000104307:3759 |               | DOWNSTREAM             | 1.096                                                        | 2.399                          | 459.61             | 1102.62            | 2.630                          | 369.52             | 971.74             |
| A_68_P27971501 | chr11:83253964-83254008                           | NM_025492:2791          | 1700020L24Rik | INSIDE                 | 1.095                                                        | 1.590                          | 771.86             | 1227.18            | 1.741                          | 713.71             | 1242.38            |
| A_68_P31259472 | chr17:57136735-57136779                           | NM_025538:-5            | Alkbh7        | PROMOTER               | 1.095                                                        | 2.824                          | 2326.47            | 6569.20            | 3.093                          | 1874.19            | 5796.53            |
| A_68_P22503477 | chr3:126299555-126299599                          | NM_001025438:-314       | Camk2d        | PROMOTER               | 1.095                                                        | 0.571                          | 1547.58            | 883.86             | 0.626                          | 1330.01            | 831.96             |
| A_68_P20716449 | chr1:153602522-153602566                          | NM_001039644:41         | Edem3         | INSIDE                 | 1.095                                                        | 1.760                          | 1489.59            | 2621.41            | 1.927                          | 1380.28            | 2660.08            |
| A_68_P28059762 | chr11:98843848-98843892                           | NM_178596:460           | Gjd3          | INSIDE                 | 1.095                                                        | 3.871                          | 483.38             | 1871.34            | 4.237                          | 451.17             | 1911.80            |
| A_68_P22141943 | chr3:53267216-53267260                            | NM_172501:-58           | Nhlrc3        | DIVERGENT_PROMOTER     | 1.095                                                        | 1.523                          | 1173.78            | 1787.53            | 1.668                          | 1090.97            | 1819.98            |
| A_68_P20474869 | chr1:99992118-99992162                            | NM_013626:69            | Pam           | INSIDE                 | 1.095                                                        | 2.214                          | 936.07             | 2072.47            | 2.424                          | 900.91             | 2183.96            |
| A_68_P30346596 | chr15:76009591-76009635                           | NM_201394:16528         | Plec          | INSIDE                 | 1.095                                                        | 3.534                          | 655.50             | 2316.62            | 3.871                          | 479.63             | 1856.44            |
| A_68_P24171758 | chr5:147889132-147889176                          | NM_181730:11            | Poir1d        | INSIDE                 | 1.095                                                        | 1.643                          | 771.88             | 1268.14            | 1.800                          | 718.92             | 1293.89            |
| A_68_P29989756 | chr15:6659356-6659404                             | NM_030168:1000          | Rictor        | INSIDE                 | 1.095                                                        | 2.369                          | 506.49             | 1200.04            | 2.594                          | 410.35             | 1064.66            |
| A_68_P29676506 | chr14:66572378-66572422                           | NM_172604:181           | Scara3        | INSIDE                 | 1.095                                                        | 1.636                          | 551.54             | 902.35             | 1.791                          | 478.77             | 857.42             |
| A_68_P29244711 | chr13:96901122-96901166                           | NM_029210:1388          | Sv2c          | INSIDE                 | 1.095                                                        | 1.659                          | 2464.91            | 4089.63            | 1.817                          | 1941.61            | 3526.98            |
| A_68_P21890547 | chr2:178142154-178142198                          | NM_177191:187           | Sycp2         | INSIDE                 | 1.095                                                        | 2.740                          | 1751.06            | 4798.67            | 3.000                          | 1329.81            | 3988.97            |
| A_68_P25195710 | chr7:74904616-74904660                            | NM_183312:-10           | Synn          | PROMOTER               | 1.095                                                        | 1.485                          | 948.71             | 1408.90            | 1.626                          | 811.41             | 1319.28            |
| A_68_P21817998 | chr2:164286400-164286444                          | NM_025575:-48           | Sys1          | PROMOTER               | 1.095                                                        | 0.439                          | 1184.32            | 520.46             | 0.481                          | 1029.52            | 495.43             |
| A_68_P29880583 | chr14:106505860-106505904                         | NM_198601:468           | Trim52        | INSIDE                 | 1.095                                                        | 2.842                          | 209.31             | 594.90             | 3.112                          | 213.04             | 662.96             |
| A_68_P23865420 | chr5:87233089-87233133                            | NM_177680:-404          | Ythdc1        | PROMOTER               | 1.095                                                        | 1.800                          | 1699.39            | 3058.05            | 1.971                          | 1322.24            | 2605.80            |
| A_68_P28396998 | A_68_P28396998                                    |                         |               | Unknown                | 1.095                                                        | 2.358                          | 307.01             | 723.80             | 2.582                          | 258.93             | 668.60             |
| A_68_P23443314 | chr5:3100163-3100207                              | ENSMUST00000161709:9416 |               | DOWNSTREAM             | 1.095                                                        | 2.099                          | 627.81             | 1317.50            | 2.298                          | 602.79             | 1385.26            |
| A_68_P27083333 | chr10:40022153-40022197                           | NM_009665:-180          | Amd1          | PROMOTER               | 1.094                                                        | 0.552                          | 2098.05            | 1158.94            | 0.604                          | 1648.03            | 996.14             |
| A_68_P24797812 | chr6:120244301-120244345                          | NM_198884:255           | B4galnt3      | INSIDE                 | 1.094                                                        | 1.764                          | 1475.74            | 2603.83            | 1.931                          | 1294.51            | 2499.84            |
| A_68_P32145750 | chr19:46835351-46835395                           | NM_001102471:-726       | Cnmn2         | PROMOTER               | 1.094                                                        | 2.382                          | 953.34             | 2270.87            | 2.606                          | 904.07             | 2356.42            |
| A_68_P26584125 | chr9:64659762-64659806                            | NM_001162917:967        | Dennd4a       | INSIDE                 | 1.094                                                        | 1.796                          | 801.75             | 1439.91            | 1.965                          | 720.56             | 1416.04            |
| A_68_P32561248 | chrX:97972645-97972689                            | NM_001177780:57         | Dlg3          | INSIDE                 | 1.094                                                        | 2.285                          | 678.85             | 1551.46            | 2.500                          | 326.80             | 817.04             |
| A_68_P21221948 | chr2:52717600-52717648                            | NM_172409:723           | Fmn12         | INSIDE                 | 1.094                                                        | 1.605                          | 686.17             | 1101.62            | 1.757                          | 570.74             | 1002.80            |
| A_68_P26512824 | chr9:51856849-51856893                            | NR_023357:-60           | Gm6981        | PROMOTER               | 1.094                                                        | 1.575                          | 466.03             | 734.16             | 1.723                          | 475.43             | 819.33             |
| A_68_P31828825 | chr18:74129885-74129929                           | NM_172632:94697         | Mapk4         | INSIDE                 | 1.094                                                        | 1.973                          | 848.06             | 1673.02            | 2.158                          | 728.11             | 1570.94            |
| A_68_P26082830 | chr8:97876281-97876325                            | NM_008609:66            | Mmp15         | INSIDE                 | 1.094                                                        | 1.684                          | 465.56             | 784.15             | 1.843                          | 396.54             | 730.78             |
| A_68_P26789126 | chr9:103905204-103905248                          | NM_172460:353           | Nphp3         | INSIDE                 | 1.094                                                        | 1.460                          | 989.50             | 1444.25            | 1.597                          | 820.31             | 1310.40            |
| A_68_P31793419 | chr18:67883751-67883795                           | NM_001127177:503        | Ptpn2         | INSIDE                 | 1.094                                                        | 0.472                          | 1280.61            | 605.05             | 0.517                          | 1073.88            | 555.17             |
| A_68_P27359833 | chr10:93977922-93977966                           | NM_172051:343           | Tmcc3         | INSIDE                 | 1.094                                                        | 1.744                          | 755.86             | 1318.46            | 1.908                          | 613.35             | 1170.34            |



| ProbeName      | Target position of probe on CpG island microarray | TargetID                | GeneSymbol    | CpG island Description | Ratio of relative methylation (TiO <sub>2</sub> -NP/Vehicle) | Sham group                     |                    |                    | TiO <sub>2</sub> -H group      |                    |                    |
|----------------|---------------------------------------------------|-------------------------|---------------|------------------------|--------------------------------------------------------------|--------------------------------|--------------------|--------------------|--------------------------------|--------------------|--------------------|
|                |                                                   |                         |               |                        |                                                              | Relative methylation (Cy5/Cy3) | Cy3 signal (Input) | Cy5 signal (MeDIP) | Relative methylation (Cy5/Cy3) | Cy3 signal (Input) | Cy5 signal (MeDIP) |
| A_68_P24153530 | chr5:143576863-143576907                          | NM_001122730:2182       | Tnrc18        | INSIDE                 | 1.094                                                        | 0.454                          | 1851.58            | 840.83             | 0.497                          | 1583.04            | 786.50             |
| A_68_P22889130 | chr4:46520205-46520249                            | NM_029077:28790         | Trim14        | INSIDE                 | 1.094                                                        | 1.548                          | 585.74             | 906.90             | 1.693                          | 529.81             | 897.02             |
| A_68_P28693527 | chr12:103996226-103996270                         | NM_025666:64            | Ubr7          | INSIDE                 | 1.094                                                        | 2.063                          | 1864.81            | 3847.91            | 2.258                          | 1501.32            | 3389.55            |
| A_68_P20804308 | chr1:169214081-169214125                          | NM_030724:1156          | Uck2          | INSIDE                 | 1.094                                                        | 2.333                          | 233.12             | 543.97             | 2.553                          | 191.55             | 488.96             |
| A_68_P27541965 | chr10:127984764-127984808                         | NM_134003:14            | Zc3h10        | INSIDE                 | 1.094                                                        | 1.926                          | 2235.07            | 4304.13            | 2.106                          | 1881.60            | 3962.33            |
| A_68_P27613618 | chr11:16851175-16851219                           | NR_015469:-100          | 2810442121Rik | DIVERGENT_PROMOTER     | 1.093                                                        | 1.475                          | 1387.50            | 2047.09            | 1.612                          | 1126.38            | 1816.10            |
| A_68_P23541453 | chr5:23893834-23893878                            | NM_001002897:4105       | Atg9b         | INSIDE                 | 1.093                                                        | 2.059                          | 1197.92            | 2466.67            | 2.252                          | 991.76             | 2233.05            |
| A_68_P30365376 | chr15:79092452-79092496                           | NM_177580:23465         | Baiap212      | INSIDE                 | 1.093                                                        | 1.453                          | 872.48             | 1267.51            | 1.589                          | 688.86             | 1094.32            |
| A_68_P21013690 | chr2:12931726-12931771                            | NM_153155:743           | C1ql3         | INSIDE                 | 1.093                                                        | 0.569                          | 2269.11            | 1292.14            | 0.623                          | 1999.12            | 1244.55            |
| A_68_P20408506 | chr1:87690361-87690405                            | NM_133781:361           | Cab39         | INSIDE                 | 1.093                                                        | 1.478                          | 2113.71            | 3124.57            | 1.615                          | 1995.21            | 3223.17            |
| A_68_P29098741 | chr13:64533952-64533996                           | NM_053180:114           | Cdk20         | INSIDE                 | 1.093                                                        | 1.674                          | 809.96             | 1355.95            | 1.830                          | 691.26             | 1265.07            |
| A_68_P21907944 | chr2:180763528-180763574                          | NM_015730:10332         | Chrna4        | INSIDE                 | 1.093                                                        | 3.030                          | 1712.53            | 5188.97            | 3.312                          | 1144.44            | 3790.51            |
| A_68_P23417710 | chr4:151656882-151656926                          | NM_178406:8434          | Gpr153        | INSIDE                 | 1.093                                                        | 2.321                          | 1424.22            | 3305.77            | 2.536                          | 1080.51            | 2740.29            |
| A_68_P23415954 | chr4:151382992-151383036                          | NM_001033352:15         | Klhl21        | INSIDE                 | 1.093                                                        | 1.545                          | 1367.30            | 2112.56            | 1.689                          | 1179.60            | 1991.84            |
| A_68_P25193398 | chr7:74517805-74517849                            | NM_001033713:-82        | Mei2a         | PROMOTER               | 1.093                                                        | 1.375                          | 1259.58            | 1732.04            | 1.502                          | 1051.74            | 1580.16            |
| A_68_P30506994 | chr16:3884902-3884946                             | NM_029090:306           | Nat15         | INSIDE                 | 1.093                                                        | 1.522                          | 1897.45            | 2888.34            | 1.664                          | 1407.78            | 2342.56            |
| A_68_P21006642 | chr2:11457159-11457203                            | NM_001177758:18376      | Pfkfb3        | INSIDE                 | 1.093                                                        | 0.580                          | 1354.46            | 785.05             | 0.633                          | 1056.28            | 669.06             |
| A_68_P21432203 | chr2:92886316-92886360                            | NM_001177536:-37        | Prdm11        | PROMOTER               | 1.093                                                        | 2.537                          | 1023.81            | 2597.57            | 2.773                          | 832.37             | 2308.57            |
| A_68_P21866930 | chr2:172805522-172805566                          | NM_001083959:202        | Spo11         | INSIDE                 | 1.093                                                        | 3.377                          | 485.14             | 1638.48            | 3.690                          | 497.32             | 1835.29            |
| A_68_P32022083 | chr19:24248437-24248481                           | NM_001198985:172        | Tjp2          | INSIDE                 | 1.093                                                        | 2.134                          | 1806.97            | 3856.71            | 2.333                          | 1673.90            | 3904.92            |
| A_68_P28553607 | chr12:77472331-77472375                           | NM_178744:1100          | Zbtb1         | INSIDE                 | 1.093                                                        | 1.590                          | 2262.82            | 3597.87            | 1.738                          | 1619.54            | 2814.80            |
| A_68_P25505251 | chr7:134487065-134487109                          | NM_146202:1742          | Zfp768        | INSIDE                 | 1.093                                                        | 2.159                          | 1738.56            | 3753.23            | 2.359                          | 1355.70            | 3198.30            |
| A_68_P26559434 | chr9:60369978-60370022                            | ENSMUST00000140824:-147 |               | PROMOTER               | 1.093                                                        | 2.735                          | 343.89             | 940.40             | 2.989                          | 326.64             | 976.22             |
| A_68_P21483986 | chr2:103406434-103406478                          | NM_178890:-10           | Abtb2         | PROMOTER               | 1.092                                                        | 1.590                          | 2469.94            | 3927.43            | 1.736                          | 1790.45            | 3108.70            |
| A_68_P23342103 | chr4:137352189-137352233                          | NM_007431:82            | Alpl          | INSIDE                 | 1.092                                                        | 2.207                          | 885.02             | 1953.63            | 2.410                          | 865.49             | 2086.12            |
| A_68_P32384237 | chrX:50144177-50144221                            | NM_001034059:-178       | Ccdc160       | PROMOTER               | 1.092                                                        | 1.926                          | 680.66             | 1310.80            | 2.104                          | 395.01             | 830.95             |
| A_68_P26543679 | chr9:57613020-57613064                            | NM_007713:625           | Clk3          | INSIDE                 | 1.092                                                        | 2.246                          | 713.12             | 1601.84            | 2.453                          | 624.13             | 1531.21            |
| A_68_P26249217 | chr8:127577984-127578028                          | NM_174853:-88           | Disc1         | PROMOTER               | 1.092                                                        | 1.405                          | 2176.29            | 3057.95            | 1.535                          | 1676.53            | 2572.87            |
| A_68_P27094078 | chr10:41995833-41995877                           | NM_019740:694           | Foxo3         | INSIDE                 | 1.092                                                        | 1.946                          | 1132.38            | 2203.31            | 2.125                          | 996.06             | 2116.45            |
| A_68_P24449405 | chr6:52196592-52196638                            | NM_010450:-848          | Hoxa11        | PROMOTER               | 1.092                                                        | 2.078                          | 254.53             | 528.92             | 2.269                          | 206.42             | 468.39             |
| A_68_P24449194 | chr6:52171860-52171904                            | NM_010455:-3310         | Hoxa7         | PROMOTER               | 1.092                                                        | 2.981                          | 816.63             | 2434.60            | 3.255                          | 710.25             | 2311.83            |
| A_68_P27160596 | chr10:57206710-57206754                           | NM_008297:542           | Hsf2          | INSIDE                 | 1.092                                                        | 1.967                          | 679.85             | 1336.92            | 2.146                          | 676.80             | 1452.75            |
| A_68_P25259449 | chr7:86294014-86294058                            | NM_001045489:-90        | Mfge8         | PROMOTER               | 1.092                                                        | 1.683                          | 965.64             | 1625.51            | 1.838                          | 854.34             | 1569.95            |
| A_68_P26129004 | chr8:107058523-107058567                          | NM_144931:-7            | Nae1          | DIVERGENT_PROMOTER     | 1.092                                                        | 1.827                          | 635.44             | 1161.02            | 1.996                          | 610.90             | 1219.32            |
| A_68_P32240895 | chrX:7499312-7499356                              | NM_013892:2387          | Peskin        | INSIDE                 | 1.092                                                        | 1.881                          | 702.32             | 1321.14            | 2.054                          | 388.47             | 797.86             |
| A_68_P28197874 | chr12:3960028-3960072                             | NM_008895:5100          | Pome          | INSIDE                 | 1.092                                                        | 1.566                          | 1562.96            | 2447.85            | 1.710                          | 1350.78            | 2310.05            |
| A_68_P28112588 | chr11:108204767-108204813                         | NM_011101:412           | Prkca         | INSIDE                 | 1.092                                                        | 1.524                          | 701.76             | 1069.68            | 1.664                          | 622.72             | 1036.41            |
| A_68_P21005390 | chr2:11212009-11212053                            | NM_008859:118022        | Prkck         | INSIDE                 | 1.092                                                        | 2.726                          | 459.91             | 1253.81            | 2.977                          | 423.30             | 1260.32            |
| A_68_P25427818 | chr7:120097419-120097463                          | NM_175279:-35           | Rassf10       | PROMOTER               | 1.092                                                        | 1.871                          | 1730.24            | 3236.87            | 2.043                          | 1421.81            | 2904.66            |
| A_68_P31985666 | chr19:17468871-17468915                           | NM_019437:360           | Rfk           | INSIDE                 | 1.092                                                        | 2.565                          | 529.91             | 1359.11            | 2.803                          | 556.06             | 1557.61            |
| A_68_P22336986 | chr3:93359142-93359186                            | NM_009112:126           | S100a10       | INSIDE                 | 1.092                                                        | 1.758                          | 1614.85            | 2839.13            | 1.920                          | 1482.65            | 2846.78            |
| A_68_P20585385 | chr1:127457901-127457945                          | NM_028787:330           | Slc35f5       | INSIDE                 | 1.092                                                        | 1.638                          | 1881.03            | 3081.93            | 1.789                          | 1488.57            | 2662.31            |
| A_68_P21875635 | chr2:174298480-174298524                          | NM_025531:-60           | Slmo2         | PROMOTER               | 1.092                                                        | 1.905                          | 405.20             | 771.86             | 2.081                          | 405.11             | 842.84             |
| A_68_P26142249 | chr8:109459792-109459836                          | NM_009229:165           | Sntb2         | INSIDE                 | 1.092                                                        | 2.236                          | 1254.93            | 2806.20            | 2.441                          | 1215.30            | 2966.75            |
| A_68_P27332824 | chr10:89208075-89208119                           | NM_029166:361           | Uhrf1bp11     | INSIDE                 | 1.092                                                        | 2.596                          | 597.77             | 1551.87            | 2.834                          | 563.65             | 1597.36            |
| A_68_P31208848 | chr17:46910008-46910052                           | NM_025966:447           | 2310039H08Rik | INSIDE                 | 1.091                                                        | 1.438                          | 944.27             | 1358.31            | 1.569                          | 932.43             | 1463.08            |
| A_68_P27649725 | chr11:24064408-24064452                           | NM_001159290:83736      | Bcl11a        | INSIDE                 | 1.091                                                        | 2.063                          | 1958.95            | 4041.01            | 2.251                          | 1478.96            | 3329.41            |
| A_68_P29511373 | chr14:32150285-32150329                           | NM_009796:397           | Capn7         | INSIDE                 | 1.091                                                        | 3.179                          | 1243.34            | 3952.01            | 3.468                          | 1100.41            | 3816.28            |
| A_68_P29338036 | chr13:113777997-113778041                         | NM_001081062:9          | Ceno          | INSIDE                 | 1.091                                                        | 0.430                          | 1682.61            | 722.85             | 0.469                          | 1393.68            | 653.36             |
| A_68_P32229422 | chr19:61304541-61304585                           | NM_009970:-241          | Csf2ra        | PROMOTER               | 1.091                                                        | 2.262                          | 925.24             | 2092.53            | 2.468                          | 849.59             | 2096.72            |
| A_68_P27446113 | chr10:110357232-110357276                         | NM_007792:23            | Csrp2         | INSIDE                 | 1.091                                                        | 0.558                          | 2555.40            | 1425.10            | 0.608                          | 1897.56            | 1154.62            |

| ProbeName      | Target position of probe on CpG island microarray | TargetID               | GeneSymbol    | CpG island Description | Ratio of relative methylation (TiO <sub>2</sub> -NP/Vehicle) | Sham group                     |                    |                    | TiO <sub>2</sub> -H group      |                    |                    |
|----------------|---------------------------------------------------|------------------------|---------------|------------------------|--------------------------------------------------------------|--------------------------------|--------------------|--------------------|--------------------------------|--------------------|--------------------|
|                |                                                   |                        |               |                        |                                                              | Relative methylation (Cy5/Cy3) | Cy3 signal (Input) | Cy5 signal (MeDIP) | Relative methylation (Cy5/Cy3) | Cy3 signal (Input) | Cy5 signal (MeDIP) |
| A_68_P25462320 | chr7:126327951-126327995                          | NM_001024138:-84       | Gpr139        | PROMOTER               | 1.091                                                        | 1.512                          | 939.92             | 1421.21            | 1.650                          | 736.08             | 1214.59            |
| A_68_P23573588 | chr5:30924821-30924865                            | NM_010608:34300        | Kenk3         | INSIDE                 | 1.091                                                        | 1.839                          | 544.11             | 1000.38            | 2.006                          | 558.17             | 1119.66            |
| A_68_P25349937 | chr7:104480730-104480774                          | NM_001039039:-80       | Kctd21        | DIVERGENT_PROMOTER     | 1.091                                                        | 1.668                          | 877.16             | 1462.83            | 1.819                          | 815.43             | 1483.00            |
| A_68_P25784752 | chr8:37311896-37311940                            | NM_001081150:652       | Lonrf1        | INSIDE                 | 1.091                                                        | 1.739                          | 541.73             | 942.17             | 1.898                          | 526.66             | 999.42             |
| A_68_P20023663 | chr1:9690009-9690053                              | NM_008651:260          | Mybl1         | INSIDE                 | 1.091                                                        | 0.519                          | 3635.95            | 1887.26            | 0.566                          | 2821.43            | 1597.30            |
| A_68_P24117615 | chr5:136210361-136210405                          | NM_008898:45299        | Por           | INSIDE                 | 1.091                                                        | 1.734                          | 584.65             | 1014.05            | 1.892                          | 524.31             | 992.21             |
| A_68_P26594001 | chr9:66441281-66441325                            | NM_144937:-515         | Usp3          | PROMOTER               | 1.091                                                        | 0.576                          | 2182.33            | 1257.82            | 0.629                          | 1688.66            | 1062.32            |
| A_68_P23059230 | chr4:82505564-82505608                            | NM_026647:-21          | Zdhhc21       | PROMOTER               | 1.091                                                        | 1.889                          | 970.77             | 1833.93            | 2.061                          | 880.93             | 1815.98            |
| A_68_P29224480 | chr13:93301031-93301075                           | NM_173392:-287         | Zfyve16       | PROMOTER               | 1.091                                                        | 0.464                          | 1398.64            | 648.88             | 0.506                          | 1184.82            | 599.58             |
| A_68_P24908454 | chr6:143048465-143048509                          | NM_001109688:141       | 5730419109Rik | INSIDE                 | 1.090                                                        | 1.465                          | 894.46             | 1309.98            | 1.597                          | 742.86             | 1186.33            |
| A_68_P32350054 | chrX:41720980-41721024                            | NM_175539:512          | Deaf1212      | INSIDE                 | 1.090                                                        | 1.457                          | 1795.18            | 2615.06            | 1.588                          | 941.44             | 1495.00            |
| A_68_P26227567 | chr8:124102726-124102770                          | NM_133765:-42          | Fbxo31        | PROMOTER               | 1.090                                                        | 2.066                          | 2748.15            | 5677.93            | 2.252                          | 2044.88            | 4604.11            |
| A_68_P23577609 | chr5:31597809-31597853                            | NM_022424:420          | Fndc4         | INSIDE                 | 1.090                                                        | 1.739                          | 9346.16            | 16252.36           | 1.896                          | 7226.94            | 13702.41           |
| A_68_P28577468 | chr12:81858602-81858646                           | NM_001008423:3078      | Gm1568        | INSIDE                 | 1.090                                                        | 1.986                          | 1107.37            | 2199.70            | 2.164                          | 880.52             | 1905.66            |
| A_68_P28186730 | chr11:120645846-120645891                         | NM_145370:40           | Gps1          | INSIDE                 | 1.090                                                        | 2.505                          | 242.19             | 606.71             | 2.730                          | 205.36             | 560.59             |
| A_68_P27924566 | chr11:74979860-74979904                           | NM_001098203:1772      | Hic1          | INSIDE                 | 1.090                                                        | 0.538                          | 1490.23            | 801.41             | 0.586                          | 1093.12            | 641.03             |
| A_68_P23333246 | chr4:135867340-135867384                          | NM_028871:472          | Hnrmp1        | INSIDE                 | 1.090                                                        | 1.697                          | 965.19             | 1638.13            | 1.850                          | 792.11             | 1465.12            |
| A_68_P27353693 | chr10:92916270-92916314                           | NM_008517:152          | Lta4h         | INSIDE                 | 1.090                                                        | 0.582                          | 1397.76            | 813.35             | 0.634                          | 1224.43            | 776.44             |
| A_68_P32148146 | chr19:47253257-47253301                           | NM_021360:-31          | Neurl1a       | PROMOTER               | 1.090                                                        | 1.559                          | 707.46             | 1102.93            | 1.699                          | 612.61             | 1040.68            |
| A_68_P31935410 | chr19:6531540-6531584                             | NM_001205234:112825    | Nrxn2         | INSIDE                 | 1.090                                                        | 0.543                          | 1937.03            | 1051.72            | 0.592                          | 1523.40            | 901.80             |
| A_68_P25427821 | chr7:120097865-120097909                          | NM_175279:411          | Rassf10       | INSIDE                 | 1.090                                                        | 1.749                          | 1317.82            | 2304.86            | 1.907                          | 1209.87            | 2307.04            |
| A_68_P22741779 | chr4:13670817-13670861                            | NM_001111027:-7605     | Rumx1t1       | PROMOTER               | 1.090                                                        | 1.428                          | 1342.89            | 1918.06            | 1.557                          | 1071.37            | 1668.37            |
| A_68_P25586717 | chr7:148286592-148286636                          | NM_023059:-169         | Sigirr        | PROMOTER               | 1.090                                                        | 1.757                          | 835.30             | 1467.72            | 1.916                          | 735.86             | 1409.86            |
| A_68_P26766608 | chr9:99770906-99770951                            | NM_011440:5661         | Sox14         | DOWNSTREAM             | 1.090                                                        | 1.814                          | 1250.11            | 2267.81            | 1.978                          | 960.91             | 1900.56            |
| A_68_P21809439 | chr2:162757267-162757311                          | NM_026499:45           | Srsf6         | INSIDE                 | 1.090                                                        | 3.456                          | 1093.28            | 3778.55            | 3.767                          | 948.14             | 3571.23            |
| A_68_P25947574 | chr8:72149082-72149126                            | NM_001045553:-30       | Zfp868        | PROMOTER               | 1.090                                                        | 0.489                          | 1490.68            | 728.48             | 0.532                          | 1439.65            | 766.58             |
| A_68_P30413820 | chr15:87375020-87375064                           | ENSMUST00000169110:139 |               | INSIDE                 | 1.090                                                        | 1.546                          | 718.08             | 1109.84            | 1.684                          | 666.87             | 1123.01            |
| A_68_P24830751 | chr6:127059602-127059646                          | NM_177003:-54          | 9630033F20Rik | PROMOTER               | 1.089                                                        | 0.585                          | 1703.63            | 996.57             | 0.637                          | 1313.56            | 836.50             |
| A_68_P27282593 | chr10:79804404-79804448                           | NM_001113548:6765      | Adams15       | INSIDE                 | 1.089                                                        | 1.727                          | 2643.31            | 4565.54            | 1.882                          | 2176.75            | 4095.73            |
| A_68_P26291034 | chr9:8134431-8134475                              | NM_001045524:-158      | AK129341      | PROMOTER               | 1.089                                                        | 2.008                          | 727.17             | 1460.48            | 2.188                          | 635.94             | 1391.47            |
| A_68_P24758539 | chr6:113233198-113233242                          | NM_170673:920          | Cpne9         | INSIDE                 | 1.089                                                        | 1.342                          | 2195.07            | 2945.46            | 1.461                          | 1824.69            | 2666.41            |
| A_68_P30896820 | chr16:78576898-78576942                           | NM_025967:-7           | D16Ert472c    | PROMOTER               | 1.089                                                        | 1.466                          | 763.07             | 1118.89            | 1.596                          | 636.63             | 1016.24            |
| A_68_P25410983 | chr7:117103395-117103439                          | NM_021494:520          | Dennd5a       | INSIDE                 | 1.089                                                        | 2.208                          | 1236.91            | 2731.21            | 2.404                          | 1097.45            | 2638.69            |
| A_68_P28672826 | chr12:100139771-100139815                         | NM_001081191:-98       | Eml5          | PROMOTER               | 1.089                                                        | 2.423                          | 1085.33            | 2629.26            | 2.637                          | 973.42             | 2567.26            |
| A_68_P29644194 | chr14:60997825-60997869                           | NM_001164705:724       | Fam123a       | INSIDE                 | 1.089                                                        | 1.764                          | 919.47             | 1621.70            | 1.921                          | 815.23             | 1566.47            |
| A_68_P32678434 | chrX:132373604-132373648                          | NM_001163015:54        | Gprasp2       | INSIDE                 | 1.089                                                        | 2.036                          | 996.22             | 2028.35            | 2.217                          | 634.40             | 1406.66            |
| A_68_P21080306 | chr2:26516993-26517037                            | NM_010695:9788         | Lcn4          | DOWNSTREAM             | 1.089                                                        | 2.024                          | 541.27             | 1095.45            | 2.203                          | 559.93             | 1233.66            |
| A_68_P20337470 | chr1:72583581-72583625                            | NM_001045533:-464      | Marchf4       | PROMOTER               | 1.089                                                        | 4.420                          | 1932.71            | 8541.63            | 4.815                          | 1637.09            | 7882.05            |
| A_68_P27788133 | chr11:50173073-50173117                           | NR_030529:-1713        | Mir804        | PROMOTER               | 1.089                                                        | 1.605                          | 2614.47            | 4196.32            | 1.748                          | 2064.20            | 3608.20            |
| A_68_P27560009 | chr11:4749259-4749303                             | NM_010898:250          | Nf2           | INSIDE                 | 1.089                                                        | 2.234                          | 1172.00            | 2618.64            | 2.434                          | 1032.93            | 2513.90            |
| A_68_P27922135 | chr11:74536870-74536914                           | NR_037610:468          | Pafah1b1      | INSIDE                 | 1.089                                                        | 1.440                          | 2095.50            | 3017.17            | 1.568                          | 1805.45            | 2830.26            |
| A_68_P28594554 | chr12:85113181-85113234                           | NM_001205343:8624      | Papln         | INSIDE                 | 1.089                                                        | 2.860                          | 390.19             | 1115.97            | 3.115                          | 341.98             | 1065.20            |
| A_68_P26542154 | chr9:57352236-57352280                            | NM_133982:350          | Rpp25         | INSIDE                 | 1.089                                                        | 0.584                          | 2362.39            | 1379.66            | 0.636                          | 1965.79            | 1250.17            |
| A_68_P28036073 | chr11:94871704-94871750                           | NM_146025:534          | Samd14        | INSIDE                 | 1.089                                                        | 2.107                          | 5933.03            | 12498.82           | 2.295                          | 3951.23            | 9067.87            |
| A_68_P21075769 | chr2:25876845-25876892                            | NM_133835:412          | Ubac1         | INSIDE                 | 1.089                                                        | 1.482                          | 1130.86            | 1675.83            | 1.614                          | 883.53             | 1425.81            |
| A_68_P23254147 | chr4:120624114-120624158                          | NM_001005788:170       | Zfp69         | INSIDE                 | 1.089                                                        | 2.275                          | 2074.37            | 4718.46            | 2.476                          | 1737.50            | 4302.89            |
| A_68_P20286846 | chr1:63492907-63492951                            | NM_001177600:451       | Adam23        | INSIDE                 | 1.088                                                        | 1.815                          | 1485.81            | 2697.48            | 1.975                          | 1305.15            | 2578.00            |
| A_68_P23542163 | chr5:23991120-23991164                            | NM_139153:33148        | Agap3         | INSIDE                 | 1.088                                                        | 1.597                          | 1168.11            | 1864.92            | 1.737                          | 1061.88            | 1843.97            |
| A_68_P27103326 | chr10:43724148-43724192                           | NM_172393:482          | Aim1          | INSIDE                 | 1.088                                                        | 2.573                          | 1166.37            | 3000.62            | 2.798                          | 972.81             | 2721.78            |
| A_68_P25946258 | chr8:71612629-71612673                            | NM_007509:16           | Atp6v1b2      | INSIDE                 | 1.088                                                        | 2.878                          | 669.21             | 1926.00            | 3.130                          | 630.15             | 1972.48            |
| A_68_P20900640 | chr1:187165153-187165197                          | NM_011794:9137         | Bpnt1         | INSIDE                 | 1.088                                                        | 2.192                          | 702.20             | 1539.01            | 2.385                          | 563.89             | 1345.10            |

| ProbeName      | Target position of probe on CpG island microarray | TargetID               | GeneSymbol    | CpG island Description | Ratio of relative methylation (TiO <sub>2</sub> -NP/Vehicle) | Sham group                     |                    |                    | TiO <sub>2</sub> -H group      |                    |                    |
|----------------|---------------------------------------------------|------------------------|---------------|------------------------|--------------------------------------------------------------|--------------------------------|--------------------|--------------------|--------------------------------|--------------------|--------------------|
|                |                                                   |                        |               |                        |                                                              | Relative methylation (Cy5/Cy3) | Cy3 signal (Input) | Cy5 signal (MeDIP) | Relative methylation (Cy5/Cy3) | Cy3 signal (Input) | Cy5 signal (MeDIP) |
| A_68_P24008368 | chr5:115643546-115643590                          | NM_013879:7438         | Cabp1         | PROMOTER               | 1.088                                                        | 0.494                          | 1592.32            | 785.95             | 0.537                          | 1390.94            | 746.97             |
| A_68_P29651395 | chr14:62301504-62301548                           | NR_028264:316          | Dleu2         | PROMOTER               | 1.088                                                        | 1.774                          | 939.19             | 1666.15            | 1.931                          | 839.18             | 1620.32            |
| A_68_P20317719 | chr1:69153647-69153691                            | NM_010154:965          | ErbB4         | INSIDE                 | 1.088                                                        | 2.366                          | 689.52             | 1631.39            | 2.575                          | 585.82             | 1508.69            |
| A_68_P23582140 | chr5:32435627-32435671                            | NM_008037:3196         | Fosl2         | PROMOTER               | 1.088                                                        | 1.493                          | 642.03             | 958.50             | 1.624                          | 519.60             | 844.07             |
| A_68_P24990912 | chr7:19597699-19597743                            | NM_008260:11168        | Foxa3         | DOWNSTREAM             | 1.088                                                        | 3.928                          | 207.60             | 815.53             | 4.273                          | 221.23             | 945.35             |
| A_68_P29531946 | chr14:35632404-35632448                           | NM_008166:895          | Grid1         | PROMOTER               | 1.088                                                        | 1.695                          | 625.50             | 1059.92            | 1.843                          | 535.61             | 987.18             |
| A_68_P25021327 | chr7:29136106-29136150                            | NR_028129:430          | LOC100302567  | PROMOTER               | 1.088                                                        | 2.380                          | 5000.00            | 11900.01           | 2.590                          | 3683.82            | 9542.52            |
| A_68_P28056218 | chr11:98261638-98261682                           | NM_001033537:144       | Pgap3         | INSIDE                 | 1.088                                                        | 1.799                          | 1283.50            | 2309.61            | 1.958                          | 1110.18            | 2173.68            |
| A_68_P24170388 | chr5:147656591-147656635                          | NM_026864:34           | Ras11a        | PROMOTER               | 1.088                                                        | 2.313                          | 438.53             | 1014.12            | 2.517                          | 536.51             | 1350.29            |
| A_68_P25499763 | chr7:133435519-133435563                          | NM_145587:19408        | Sbk1          | INSIDE                 | 1.088                                                        | 2.004                          | 1195.03            | 2395.20            | 2.180                          | 992.60             | 2164.17            |
| A_68_P32672217 | chrX:131010986-131011030                          | NM_028958:21           | Taf7l         | INSIDE                 | 1.088                                                        | 1.990                          | 1340.55            | 2667.57            | 2.165                          | 535.73             | 1159.63            |
| A_68_P26752041 | chr9:97266267-97266311                            | NM_030219:4089         | Trim42        | INSIDE                 | 1.088                                                        | 2.208                          | 574.16             | 1267.98            | 2.403                          | 518.00             | 1244.76            |
| A_68_P31889610 | chr18:84759292-84759336                           | NM_001033341:418       | Zfp407        | PROMOTER               | 1.088                                                        | 2.542                          | 1038.85            | 2640.85            | 2.765                          | 861.68             | 2382.47            |
| A_68_P25735815 | chr8:28089687-28089731                            | NM_001101502:1901      | Zfp703        | INSIDE                 | 1.088                                                        | 0.611                          | 3527.33            | 2156.10            | 0.665                          | 2599.19            | 1728.05            |
| A_68_P28677373 | chr12:100883228-100883278                         | ENSMUST00000158736:-70 |               | PROMOTER               | 1.088                                                        | 2.570                          | 228.82             | 588.11             | 2.797                          | 197.12             | 551.38             |
| A_68_P32443537 | chrX:66613822-66613866                            | NM_008032:339          | Aif2          | INSIDE                 | 1.087                                                        | 1.829                          | 895.87             | 1638.81            | 1.989                          | 441.52             | 878.02             |
| A_68_P30462686 | chr15:96116941-96116985                           | NM_175251:990          | Arid2         | PROMOTER               | 1.087                                                        | 3.061                          | 370.46             | 1134.12            | 3.329                          | 336.06             | 1118.76            |
| A_68_P23069979 | chr4:84320697-84320741                            | NM_172870:272          | Bnc2          | INSIDE                 | 1.087                                                        | 1.825                          | 748.75             | 1366.52            | 1.984                          | 669.67             | 1328.41            |
| A_68_P20910362 | chr1:188791704-188791749                          | NM_033077:432          | D1Pas1        | INSIDE                 | 1.087                                                        | 1.845                          | 735.33             | 1356.69            | 2.005                          | 591.72             | 1186.32            |
| A_68_P30630419 | chr16:28446947-28446991                           | NM_183064:-1655        | Fgf12         | PROMOTER               | 1.087                                                        | 2.102                          | 459.89             | 966.85             | 2.286                          | 384.98             | 879.93             |
| A_68_P32563072 | chrX:98449525-98449570                            | NM_018789:-319         | Foxo4         | PROMOTER               | 1.087                                                        | 3.550                          | 1639.04            | 5817.97            | 3.859                          | 824.20             | 3180.59            |
| A_68_P25348906 | chr7:104230072-104230116                          | NM_001162477:-166      | Gab2          | PROMOTER               | 1.087                                                        | 6.600                          | 8024.21            | 52957.00           | 7.176                          | 6424.64            | 46106.17           |
| A_68_P21932362 | chr3:8462856-8462900                              | NR_033512:220          | Gm6194        | INSIDE                 | 1.087                                                        | 1.934                          | 1388.70            | 2686.41            | 2.103                          | 980.84             | 2063.11            |
| A_68_P30473864 | chr15:98087423-98087467                           | NM_027304:294          | H1ft          | INSIDE                 | 1.087                                                        | 2.348                          | 699.76             | 1643.17            | 2.551                          | 634.24             | 1618.21            |
| A_68_P29334866 | chr13:113253950-113253994                         | NM_010560:305          | Il6st         | PROMOTER               | 1.087                                                        | 1.445                          | 763.05             | 1102.54            | 1.571                          | 729.30             | 1145.57            |
| A_68_P20229132 | chr1:52874292-52874338                            | NM_008384:218          | Inpp1         | INSIDE                 | 1.087                                                        | 1.627                          | 1632.95            | 2656.39            | 1.768                          | 1277.61            | 2259.43            |
| A_68_P28291801 | chr12:25516771-25516815                           | NM_001083341:329       | Mboat2        | INSIDE                 | 1.087                                                        | 2.263                          | 634.38             | 1435.69            | 2.461                          | 555.62             | 1367.22            |
| A_68_P25263202 | chr7:86937639-86937683                            | NM_008588:816          | Mesp1         | INSIDE                 | 1.087                                                        | 1.465                          | 838.96             | 1228.99            | 1.592                          | 743.62             | 1184.00            |
| A_68_P29751162 | chr14:79790477-79790521                           | NM_025832:-23          | Naa16         | DIVERGENT_PROMOTER     | 1.087                                                        | 2.084                          | 720.03             | 1500.88            | 2.265                          | 677.17             | 1534.05            |
| A_68_P31207758 | chr17:46728606-46728650                           | NM_175168:37825        | Ptk7          | INSIDE                 | 1.087                                                        | 2.213                          | 950.09             | 2102.09            | 2.405                          | 812.40             | 1954.23            |
| A_68_P21106144 | chr2:30808670-30808714                            | NM_133673:172          | Tor1b         | INSIDE                 | 1.087                                                        | 0.599                          | 1166.94            | 699.08             | 0.651                          | 916.87             | 597.27             |
| A_68_P31372685 | chr17:79024354-79024402                           | NM_001197028:116976    | Vit           | INSIDE                 | 1.087                                                        | 1.873                          | 531.47             | 995.41             | 2.036                          | 423.84             | 863.13             |
| A_68_P32005487 | chr19:21346304-21346348                           | NM_009551:441          | Zfand5        | PROMOTER               | 1.087                                                        | 1.405                          | 1110.67            | 1560.54            | 1.527                          | 935.22             | 1428.32            |
| A_68_P31002112 | chr16:98183669-98183713                           | NM_001081684:96        | Zfp295        | INSIDE                 | 1.087                                                        | 0.575                          | 1056.91            | 607.77             | 0.625                          | 866.23             | 541.67             |
| A_68_P23145844 | chr4:99382494-99382538                            | NM_001081264:196       | Alg6          | INSIDE                 | 1.086                                                        | 1.446                          | 1249.49            | 1807.04            | 1.570                          | 1044.81            | 1640.30            |
| A_68_P32592613 | chrX:106029430-106029474                          | NM_001081477:242       | Brwd3         | INSIDE                 | 1.086                                                        | 1.470                          | 2860.43            | 4205.73            | 1.596                          | 1298.59            | 2073.00            |
| A_68_P22412539 | chr3:108218569-108218613                          | NM_001004177:-178      | Celsr2        | PROMOTER               | 1.086                                                        | 1.660                          | 1216.24            | 2018.81            | 1.803                          | 1164.73            | 2099.47            |
| A_68_P27865444 | chr11:64249527-64249571                           | NR_028445:628          | F930015N05Rik | INSIDE                 | 1.086                                                        | 2.764                          | 847.34             | 2342.45            | 3.002                          | 908.25             | 2726.73            |
| A_68_P25371472 | chr7:108256614-108256658                          | NM_001146010:-652      | Fchs2         | PROMOTER               | 1.086                                                        | 1.650                          | 1217.58            | 2008.60            | 1.791                          | 1062.57            | 1903.24            |
| A_68_P25770034 | chr8:34764345-34764389                            | NM_010344:657          | Gsr           | INSIDE                 | 1.086                                                        | 1.433                          | 1458.70            | 2090.94            | 1.557                          | 1147.76            | 1786.55            |
| A_68_P20193922 | chr1:44608989-44609033                            | NM_028450:495          | Gulp1         | INSIDE                 | 1.086                                                        | 1.372                          | 1587.56            | 2177.72            | 1.490                          | 1363.86            | 2032.28            |
| A_68_P22397119 | chr3:105261830-105261874                          | NM_019931:119          | Kend3         | INSIDE                 | 1.086                                                        | 2.245                          | 244.99             | 549.95             | 2.437                          | 294.15             | 716.85             |
| A_68_P25713199 | chr8:23970569-23970613                            | NM_001081149:580       | Myst3         | INSIDE                 | 1.086                                                        | 1.479                          | 1748.30            | 2585.19            | 1.606                          | 1548.07            | 2486.77            |
| A_68_P26022002 | chr8:87323170-87323214                            | NM_001081982:1047      | Nfix          | INSIDE                 | 1.086                                                        | 1.628                          | 834.82             | 1358.74            | 1.768                          | 700.56             | 1238.27            |
| A_68_P22878645 | chr4:44716965-44717009                            | NM_008782:6326         | Pax5          | INSIDE                 | 1.086                                                        | 1.393                          | 1322.38            | 1841.84            | 1.513                          | 1132.00            | 1712.39            |
| A_68_P31632592 | chr18:38357632-38357676                           | NM_029357:11762        | Pedh1         | INSIDE                 | 1.086                                                        | 2.484                          | 920.03             | 2285.68            | 2.699                          | 758.20             | 2046.08            |
| A_68_P31252244 | chr17:55852024-55852068                           | NM_028370:-120         | Pot1b         | PROMOTER               | 1.086                                                        | 2.296                          | 685.00             | 1572.78            | 2.493                          | 624.59             | 1557.07            |
| A_68_P26801800 | chr9:106101470-106101514                          | NM_198931:-222         | Ppm1m         | PROMOTER               | 1.086                                                        | 1.613                          | 565.30             | 911.76             | 1.751                          | 504.35             | 883.04             |
| A_68_P28991175 | chr13:43711506-43711550                           | NM_183204:363          | Rnf182        | INSIDE                 | 1.086                                                        | 2.249                          | 764.36             | 1719.41            | 2.443                          | 661.77             | 1616.44            |
| A_68_P26133225 | chr8:107873334-107873378                          | NM_001081332:1199      | Sle9a5        | INSIDE                 | 1.086                                                        | 0.610                          | 1579.39            | 962.75             | 0.662                          | 1449.88            | 960.12             |
| A_68_P28159868 | chr11:116395378-116395422                         | NM_011451:-653         | Sphk1         | PROMOTER               | 1.086                                                        | 1.603                          | 1490.45            | 2389.48            | 1.741                          | 1146.65            | 1996.62            |

| ProbeName      | Target position of probe on CpG island microarray | TargetID                  | GeneSymbol    | CpG island Description | Ratio of relative methylation (TiO <sub>2</sub> -NP/Vehicle) | Sham group                     |                    |                    | TiO <sub>2</sub> -H group      |                    |                    |
|----------------|---------------------------------------------------|---------------------------|---------------|------------------------|--------------------------------------------------------------|--------------------------------|--------------------|--------------------|--------------------------------|--------------------|--------------------|
|                |                                                   |                           |               |                        |                                                              | Relative methylation (Cy5/Cy3) | Cy3 signal (Input) | Cy5 signal (MeDIP) | Relative methylation (Cy5/Cy3) | Cy3 signal (Input) | Cy5 signal (MeDIP) |
| A_68_P31752326 | chr18:60756117-60756161                           | NM_177340:27821           | Synpo         | INSIDE                 | 1.086                                                        | 2.221                          | 1256.85            | 2791.85            | 2.411                          | 1149.92            | 2772.93            |
| A_68_P27356011 | chr10:93308901-93308948                           | NM_183199:14625           | Usp44         | INSIDE                 | 1.086                                                        | 3.954                          | 748.41             | 2959.48            | 4.293                          | 558.82             | 2399.15            |
| A_68_P21394210 | chr2:84555540-84555584                            | NM_144887:-241            | Zdhhc5        | PROMOTER               | 1.086                                                        | 2.374                          | 1388.58            | 3297.07            | 2.578                          | 1267.29            | 3267.24            |
| A_68_P24783631 | chr6:117791197-117791241                          | NM_177684:-41             | Zfp637        | PROMOTER               | 1.086                                                        | 1.775                          | 363.93             | 645.98             | 1.928                          | 355.12             | 684.55             |
| A_68_P27543827 | chr10:128347191-128347235                         | NM_007653:291             | Cd63          | INSIDE                 | 1.085                                                        | 2.181                          | 1226.97            | 2676.50            | 2.366                          | 1107.11            | 2619.12            |
| A_68_P26248668 | chr8:127473510-127473554                          | NM_053207:-378            | Egln1         | PROMOTER               | 1.085                                                        | 3.244                          | 545.00             | 1767.81            | 3.519                          | 514.37             | 1810.32            |
| A_68_P29054917 | chr13:55521884-55521928                           | NM_021489:6257            | F12           | INSIDE                 | 1.085                                                        | 4.411                          | 3153.12            | 13907.92           | 4.784                          | 2278.57            | 10899.88           |
| A_68_P27278518 | chr10:79187320-79187368                           | NM_008226:7966            | Hcn2          | INSIDE                 | 1.085                                                        | 3.426                          | 343.67             | 1177.56            | 3.718                          | 252.43             | 938.61             |
| A_68_P26537259 | chr9:56467537-56467581                            | NM_181074:65502           | Lingo1        | INSIDE                 | 1.085                                                        | 3.955                          | 2587.53            | 10233.74           | 4.291                          | 1897.13            | 8140.56            |
| A_68_P21842273 | chr2:168396596-168396647                          | NM_001136073:19070        | Nfate2        | INSIDE                 | 1.085                                                        | 5.580                          | 730.27             | 4075.04            | 6.053                          | 557.44             | 3374.42            |
| A_68_P31926006 | chr19:4942839-4942883                             | NM_172835:232             | Peli3         | INSIDE                 | 1.085                                                        | 2.397                          | 10563.21           | 25319.83           | 2.600                          | 7828.38            | 20352.98           |
| A_68_P27287760 | chr10:80616735-80616779                           | NM_021501:13709           | Pias4         | INSIDE                 | 1.085                                                        | 2.793                          | 1564.14            | 4368.36            | 3.029                          | 1257.72            | 3809.65            |
| A_68_P21351536 | chr2:76485728-76485772                            | NM_011871:301             | Prkra         | INSIDE                 | 1.085                                                        | 1.350                          | 1911.62            | 2581.54            | 1.465                          | 1645.67            | 2410.74            |
| A_68_P21608666 | chr2:126378873-126378917                          | NM_011978:135             | Slc27a2       | INSIDE                 | 1.085                                                        | 2.275                          | 463.89             | 1055.40            | 2.468                          | 580.43             | 1432.62            |
| A_68_P20901345 | chr1:187279321-187279365                          | NM_001033286:616          | Slc30a10      | INSIDE                 | 1.085                                                        | 1.453                          | 2158.64            | 3137.54            | 1.576                          | 1919.78            | 3026.20            |
| A_68_P30486835 | chr15:100467504-100467548                         | NM_001033872:-230         | Smagp         | PROMOTER               | 1.085                                                        | 1.373                          | 2862.18            | 3929.02            | 1.490                          | 2427.87            | 3617.65            |
| A_68_P32557249 | chrX:97016733-97016777                            | NM_001081283:347          | Tmem28        | INSIDE                 | 1.085                                                        | 2.341                          | 759.64             | 1778.27            | 2.539                          | 493.97             | 1254.15            |
| A_68_P26253146 | chr8:128193938-128193982                          | NM_028908:243             | 4933403G14Rik | INSIDE                 | 1.084                                                        | 2.367                          | 406.41             | 961.89             | 2.566                          | 386.04             | 990.76             |
| A_68_P27320008 | chr10:86956714-86956759                           | NM_008553:-331            | Ase11         | PROMOTER               | 1.084                                                        | 2.454                          | 354.66             | 870.18             | 2.661                          | 320.68             | 853.27             |
| A_68_P26372312 | chr9:26563608-26563652                            | NM_029792:4484            | B3gat1        | INSIDE                 | 1.084                                                        | 1.764                          | 438.16             | 773.11             | 1.913                          | 321.66             | 615.24             |
| A_68_P24372703 | chr6:37391889-37391933                            | NM_178661:238             | Creb3l2       | INSIDE                 | 1.084                                                        | 2.131                          | 1571.80            | 3349.57            | 2.311                          | 1302.35            | 3009.34            |
| A_68_P23244385 | chr4:118905637-118905681                          | NM_001042411:-775         | Lepre1        | PROMOTER               | 1.084                                                        | 0.546                          | 1114.00            | 607.96             | 0.591                          | 1081.07            | 639.37             |
| A_68_P32579350 | chrX:102316061-102316105                          | NM_053201:348             | Magee1        | INSIDE                 | 1.084                                                        | 2.179                          | 794.27             | 1730.67            | 2.362                          | 509.38             | 1203.08            |
| A_68_P25809394 | chr8:42219374-42219418                            | NM_001005863:-316         | Mtus1         | PROMOTER               | 1.084                                                        | 0.486                          | 1338.27            | 650.56             | 0.527                          | 1201.07            | 632.62             |
| A_68_P22313146 | chr3:88137030-88137074                            | NM_024246:1303            | Tmem79        | INSIDE                 | 1.084                                                        | 2.012                          | 1491.70            | 3001.41            | 2.182                          | 1211.37            | 2642.72            |
| A_68_P22313144 | chr3:88136817-88136861                            | NM_024246:1517            | Tmem79        | INSIDE                 | 1.084                                                        | 2.398                          | 1419.15            | 3403.77            | 2.600                          | 899.90             | 2339.69            |
| A_68_P20352743 | chr1:75216251-75216295                            | NM_009447:-444            | Tuba4a        | PROMOTER               | 1.084                                                        | 1.351                          | 2017.00            | 2723.97            | 1.464                          | 1510.56            | 2211.38            |
| A_68_P28220739 | chr12:8214991-8215035                             | NM_001167767:80           | 1110057K04Rik | INSIDE                 | 1.083                                                        | 1.464                          | 3392.89            | 4967.85            | 1.585                          | 2514.03            | 3984.88            |
| A_68_P20086662 | chr1:23109142-23109186                            | NM_025746:-72             | 4933415F23Rik | PROMOTER               | 1.083                                                        | 1.897                          | 442.90             | 839.98             | 2.054                          | 489.22             | 1004.88            |
| A_68_P28889024 | chr13:24894047-24894092                           | NM_024473:544             | BC005537      | INSIDE                 | 1.083                                                        | 2.116                          | 1408.04            | 2979.88            | 2.292                          | 1418.33            | 3250.86            |
| A_68_P31485628 | chr18:9449839-9449883                             | NM_026484:288             | Ceny          | INSIDE                 | 1.083                                                        | 1.420                          | 1567.32            | 2225.76            | 1.538                          | 1500.15            | 2306.85            |
| A_68_P25637611 | chr8:8660029-8660073                              | NM_010111:723             | Efnb2         | INSIDE                 | 1.083                                                        | 1.391                          | 1911.18            | 2659.29            | 1.507                          | 1558.59            | 2348.95            |
| A_68_P23969768 | chr5:108415971-108416015                          | NM_026062:104             | Fam69a        | INSIDE                 | 1.083                                                        | 1.615                          | 3737.05            | 6035.04            | 1.749                          | 2970.71            | 5195.43            |
| A_68_P26572467 | chr9:62659271-62659315                            | NM_010193:163             | Fem1b         | INSIDE                 | 1.083                                                        | 1.740                          | 842.93             | 1466.63            | 1.884                          | 779.02             | 1467.71            |
| A_68_P25005396 | chr7:25318615-25318659                            | NM_153134:2970            | Irgq          | INSIDE                 | 1.083                                                        | 2.746                          | 2862.77            | 7861.91            | 2.975                          | 2176.56            | 6474.47            |
| A_68_P21680294 | chr2:139504121-139504165                          | NM_001126490:229          | Ism1          | INSIDE                 | 1.083                                                        | 2.270                          | 583.28             | 1323.92            | 2.457                          | 592.64             | 1456.33            |
| A_68_P32040191 | chr19:27397873-27397917                           | NM_183179:786             | Kenv2         | INSIDE                 | 1.083                                                        | 2.107                          | 802.13             | 1689.80            | 2.281                          | 676.91             | 1543.98            |
| A_68_P29509958 | chr14:31951947-31951991                           | NM_027289:3930            | Nt5dc2        | INSIDE                 | 1.083                                                        | 3.944                          | 1570.26            | 6193.19            | 4.270                          | 1095.93            | 4679.34            |
| A_68_P27922136 | chr11:74536967-74537011                           | NR_037610:372             | Pafah1b1      | INSIDE                 | 1.083                                                        | 0.512                          | 1119.25            | 572.50             | 0.554                          | 965.78             | 535.17             |
| A_68_P32668460 | chrX:130222185-130222229                          | NM_001105245:1326         | Pedh19        | INSIDE                 | 1.083                                                        | 2.529                          | 871.95             | 2205.54            | 2.740                          | 550.74             | 1508.80            |
| A_68_P27287762 | chr10:80616963-80617007                           | NM_021501:13481           | Pias4         | INSIDE                 | 1.083                                                        | 2.001                          | 826.10             | 1652.81            | 2.167                          | 690.08             | 1495.39            |
| A_68_P23435436 | chr4:154357832-154357876                          | NM_001113360:27239        | Plch2         | INSIDE                 | 1.083                                                        | 1.624                          | 1346.07            | 2185.98            | 1.759                          | 1013.35            | 1782.85            |
| A_68_P25025803 | chr7:29965431-29965475                            | NM_026545:240             | Psmc8         | INSIDE                 | 1.083                                                        | 1.646                          | 842.12             | 1386.40            | 1.783                          | 665.51             | 1186.81            |
| A_68_P27286999 | chr10:80494095-80494139                           | NM_134135:2541            | Slc39a3       | INSIDE                 | 1.083                                                        | 2.901                          | 805.63             | 2337.38            | 3.141                          | 671.47             | 2109.37            |
| A_68_P31093843 | chr17:23956823-23956878                           | NM_175229:16697           | Srrm2         | INSIDE                 | 1.083                                                        | 3.064                          | 209.21             | 640.93             | 3.319                          | 205.01             | 680.48             |
| A_68_P27504467 | chr10:121043954-121043999                         | NM_001081056:19396        | Xpot          | INSIDE                 | 1.083                                                        | 3.310                          | 2133.85            | 7062.86            | 3.586                          | 1523.13            | 5462.33            |
| A_68_P23588853 | chr5:33777078-33777122                            | ENSMUST0000030994:-3256   |               | PROMOTER               | 1.083                                                        | 3.685                          | 1717.52            | 6329.01            | 3.992                          | 1460.63            | 5830.60            |
| A_68_P26218687 | chr8:122754031-122754075                          | ENSMUST00000127664:319312 |               | INSIDE                 | 1.083                                                        | 1.449                          | 1034.17            | 1498.69            | 1.570                          | 934.02             | 1466.36            |
| A_68_P24766863 | chr6:114688424-114688468                          | NM_028835:95304           | Atg7          | INSIDE                 | 1.082                                                        | 2.256                          | 544.41             | 1228.36            | 2.441                          | 594.42             | 1450.90            |
| A_68_P24908776 | chr6:143115770-143115814                          | NM_029250:43              | Etnk1         | INSIDE                 | 1.082                                                        | 0.615                          | 1151.54            | 708.24             | 0.665                          | 1122.82            | 746.97             |
| A_68_P25307415 | chr7:96552181-96552225                            | NM_008055:-673            | Fzd4          | PROMOTER               | 1.082                                                        | 1.848                          | 1413.66            | 2611.81            | 2.000                          | 1161.64            | 2322.89            |

| ProbeName      | Target position of probe on CpG island microarray | TargetID                  | GeneSymbol    | CpG island Description | Ratio of relative methylation (TiO <sub>2</sub> -NP/Vehicle) | Sham group                     |                    |                    | TiO <sub>2</sub> -H group      |                    |                    |
|----------------|---------------------------------------------------|---------------------------|---------------|------------------------|--------------------------------------------------------------|--------------------------------|--------------------|--------------------|--------------------------------|--------------------|--------------------|
|                |                                                   |                           |               |                        |                                                              | Relative methylation (Cy5/Cy3) | Cy3 signal (Input) | Cy5 signal (MeDIP) | Relative methylation (Cy5/Cy3) | Cy3 signal (Input) | Cy5 signal (MeDIP) |
| A_68_P24126245 | chr5:137972339-137972383                          | NM_010312:2097            | Gnb2          | INSIDE                 | 1.082                                                        | 1.768                          | 1605.49            | 2839.14            | 1.913                          | 1433.29            | 2741.26            |
| A_68_P28099139 | chr11:105881776-105881820                         | NM_001037712:12282        | Kenb6         | INSIDE                 | 1.082                                                        | 1.660                          | 2806.09            | 4657.08            | 1.795                          | 2058.56            | 3695.78            |
| A_68_P27365816 | chr10:95026259-95026303                           | NR_037212:-4325           | Mir3058       | PROMOTER               | 1.082                                                        | 1.476                          | 1941.81            | 2866.07            | 1.597                          | 1704.17            | 2721.57            |
| A_68_P23792521 | chr5:72950400-72950444                            | NM_133921:462             | Nfx11         | INSIDE                 | 1.082                                                        | 2.029                          | 395.58             | 802.48             | 2.195                          | 382.97             | 840.77             |
| A_68_P31397730 | chr17:83614079-83614123                           | NM_134117:-522            | Pkdc          | PROMOTER               | 1.082                                                        | 0.519                          | 3450.30            | 1790.20            | 0.562                          | 2733.35            | 1535.13            |
| A_68_P30330340 | chr15:73253433-73253477                           | NM_007982:167             | Ptk2          | INSIDE                 | 1.082                                                        | 1.694                          | 1461.10            | 2475.21            | 1.833                          | 1438.43            | 2636.18            |
| A_68_P31631090 | chr18:38115096-38115140                           | NM_153793:-94             | Rel2          | DIVERGENT_PROMOTER     | 1.082                                                        | 1.446                          | 810.48             | 1171.94            | 1.564                          | 644.06             | 1007.62            |
| A_68_P32036078 | chr19:26680160-26680204                           | NM_011416:533             | Smarca2       | INSIDE                 | 1.082                                                        | 5.509                          | 565.99             | 3117.79            | 5.958                          | 567.26             | 3379.61            |
| A_68_P27282400 | chr10:79777704-79777748                           | NM_011789:13162           | Apc2          | INSIDE                 | 1.081                                                        | 4.071                          | 1006.26            | 4096.37            | 4.403                          | 886.28             | 3901.88            |
| A_68_P29501750 | chr14:30535873-30535917                           | NM_009785:-844            | Caena2d3      | PROMOTER               | 1.081                                                        | 1.626                          | 1086.12            | 1766.39            | 1.758                          | 959.50             | 1686.37            |
| A_68_P24818635 | chr6:125045930-125045974                          | NM_145979:-228            | Chd4          | PROMOTER               | 1.081                                                        | 1.450                          | 2836.15            | 4112.99            | 1.568                          | 2092.42            | 3280.68            |
| A_68_P24850799 | chr6:131338430-131338474                          | NM_011733:16              | Csda          | INSIDE                 | 1.081                                                        | 2.069                          | 1929.61            | 3991.90            | 2.236                          | 1746.32            | 3904.71            |
| A_68_P27187153 | chr10:62113528-62113572                           | NM_053183:396             | Ddx50         | INSIDE                 | 1.081                                                        | 2.048                          | 1143.95            | 2342.41            | 2.214                          | 922.86             | 2043.25            |
| A_68_P27835392 | chr11:59005058-59005102                           | NM_001159410:-3837        | Guk1          | PROMOTER               | 1.081                                                        | 0.434                          | 1538.20            | 667.38             | 0.469                          | 1318.39            | 618.25             |
| A_68_P27482567 | chr10:117147762-117147806                         | NM_010786:-12             | Mdm2          | PROMOTER               | 1.081                                                        | 2.078                          | 1021.72            | 2123.29            | 2.246                          | 939.52             | 2110.48            |
| A_68_P21967992 | chr3:17694822-17694866                            | NR_029814:-817            | Mir124a-2     | PROMOTER               | 1.081                                                        | 1.532                          | 1068.35            | 1636.40            | 1.655                          | 878.26             | 1453.74            |
| A_68_P23657845 | chr5:46060700-46060744                            | NM_019438:-441            | Ncapg         | PROMOTER               | 1.081                                                        | 0.395                          | 1322.04            | 522.10             | 0.427                          | 1034.57            | 441.49             |
| A_68_P21826979 | chr2:165818066-165818110                          | NM_008679:-48             | Ncoa3         | PROMOTER               | 1.081                                                        | 3.898                          | 1479.50            | 5766.38            | 4.215                          | 1277.66            | 5385.51            |
| A_68_P29510249 | chr14:31989749-31989793                           | NM_022656:30242           | Nisch         | INSIDE                 | 1.081                                                        | 2.747                          | 3074.59            | 8445.35            | 2.970                          | 2229.52            | 6620.63            |
| A_68_P32114751 | chr19:41450414-41450458                           | NM_031376:9124            | Pik3ap1       | INSIDE                 | 1.081                                                        | 2.173                          | 470.08             | 1021.30            | 2.350                          | 468.06             | 1099.76            |
| A_68_P24979913 | chr7:16730734-16730778                            | NM_148946:15108           | Ste8a2        | INSIDE                 | 1.081                                                        | 3.422                          | 4275.22            | 14628.45           | 3.698                          | 3396.45            | 12558.68           |
| A_68_P23364645 | chr4:141093735-141093779                          | NM_019763:756             | Spen          | INSIDE                 | 1.081                                                        | 1.702                          | 425.82             | 724.88             | 1.841                          | 412.57             | 759.45             |
| A_68_P31093844 | chr17:23956989-23957033                           | NM_175229:16857           | Srrm2         | INSIDE                 | 1.081                                                        | 2.495                          | 1154.37            | 2880.62            | 2.698                          | 879.58             | 2372.82            |
| A_68_P25195702 | chr7:74903601-74903645                            | NM_183312:1006            | Synn          | INSIDE                 | 1.081                                                        | 1.720                          | 402.89             | 693.15             | 1.860                          | 343.64             | 639.16             |
| A_68_P25957926 | chr8:74152893-74152937                            | NM_001029873:42740        | Unc13a        | INSIDE                 | 1.081                                                        | 2.049                          | 290.24             | 594.71             | 2.216                          | 257.69             | 570.92             |
| A_68_P29604236 | chr14:52626490-52626534                           | NM_027248:13896           | Zfp219        | INSIDE                 | 1.081                                                        | 3.110                          | 922.81             | 2870.24            | 3.361                          | 889.59             | 2989.75            |
| A_68_P30708314 | chr16:42190481-42190525                           | ENSMUST00000099761:657353 |               | DOWNSTREAM             | 1.081                                                        | 1.478                          | 761.15             | 1125.35            | 1.598                          | 672.20             | 1074.34            |
| A_68_P24944594 | chr6:149302348-149302392                          | ENSMUST00000121073:-22    |               | DIVERGENT_PROMOTER     | 1.081                                                        | 2.873                          | 1197.78            | 3441.02            | 3.105                          | 1060.99            | 3294.70            |
| A_68_P30575977 | chr16:17834072-17834116                           | NR_027959:883             | B830017H08Rik | INSIDE                 | 1.080                                                        | 2.123                          | 423.75             | 899.43             | 2.293                          | 375.44             | 860.84             |
| A_68_P23201926 | chr4:109329790-109329834                          | NM_007671:8165            | Cdkn2c        | DOWNSTREAM             | 1.080                                                        | 1.387                          | 1720.82            | 2386.25            | 1.498                          | 1604.44            | 2403.75            |
| A_68_P28158071 | chr11:116083426-116083470                         | NM_025276:15957           | Evp1          | INSIDE                 | 1.080                                                        | 1.744                          | 649.04             | 1131.68            | 1.883                          | 565.73             | 1065.47            |
| A_68_P29631462 | chr14:58689892-58689936                           | NM_013518:-1608           | Fgf9          | PROMOTER               | 1.080                                                        | 3.630                          | 1037.56            | 3765.94            | 3.921                          | 926.49             | 3632.53            |
| A_68_P25348904 | chr7:104229911-104229955                          | NM_001162477:-328         | Gab2          | PROMOTER               | 1.080                                                        | 2.251                          | 784.80             | 1766.58            | 2.430                          | 662.88             | 1610.91            |
| A_68_P25885333 | chr8:58773316-58773360                            | NM_008278:-10             | Hpgd          | PROMOTER               | 1.080                                                        | 2.028                          | 1609.36            | 3264.26            | 2.191                          | 1324.83            | 2902.42            |
| A_68_P31113973 | chr17:27194296-27194340                           | NM_080553:70              | Itrp3         | INSIDE                 | 1.080                                                        | 1.466                          | 1219.41            | 1787.40            | 1.583                          | 1010.75            | 1599.96            |
| A_68_P31304302 | chr17:66450798-66450842                           | NM_028388:11              | Ndufv2        | INSIDE                 | 1.080                                                        | 2.986                          | 664.31             | 1983.83            | 3.226                          | 630.97             | 2035.74            |
| A_68_P22101773 | chr3:45184916-45184960                            | NM_011043:2619            | Pcdh10        | INSIDE                 | 1.080                                                        | 1.638                          | 1512.32            | 2477.22            | 1.769                          | 1373.93            | 2430.73            |
| A_68_P22593188 | chr3:142544925-142544969                          | NM_178654:22              | Pkn2          | INSIDE                 | 1.080                                                        | 2.339                          | 460.27             | 1076.56            | 2.525                          | 454.22             | 1146.90            |
| A_68_P32479509 | chrX:75041437-75041481                            | NM_016979:-159            | Prkx          | PROMOTER               | 1.080                                                        | 2.647                          | 639.09             | 1691.40            | 2.857                          | 431.93             | 1234.13            |
| A_68_P29262747 | chr13:100114515-100114559                         | NM_026873:97              | Ptcd2         | INSIDE                 | 1.080                                                        | 1.599                          | 667.57             | 1067.12            | 1.727                          | 623.50             | 1076.51            |
| A_68_P22378031 | chr3:101728081-101728125                          | NM_001039371:274          | Ste22a15      | INSIDE                 | 1.080                                                        | 2.650                          | 958.43             | 2539.64            | 2.863                          | 722.35             | 2068.17            |
| A_68_P21901051 | chr2:179777462-179777506                          | NM_178750:297             | Ss18l1        | INSIDE                 | 1.080                                                        | 1.566                          | 2947.62            | 4615.63            | 1.691                          | 2650.81            | 4483.44            |
| A_68_P31826836 | chr18:73782887-73782931                           | ENSMUST00000103753:-1673  |               | PROMOTER               | 1.080                                                        | 1.586                          | 581.03             | 921.63             | 1.713                          | 522.88             | 895.68             |
| A_68_P31422206 | chr17:87681968-87682012                           | NR_015506:164             | 4833418N02Rik | INSIDE                 | 1.079                                                        | 1.609                          | 915.83             | 1473.86            | 1.737                          | 770.39             | 1338.11            |
| A_68_P21774855 | chr2:156866013-156866057                          | NM_001164663:38967        | 9830001H06Rik | INSIDE                 | 1.079                                                        | 3.132                          | 487.81             | 1527.71            | 3.380                          | 415.22             | 1403.27            |
| A_68_P31599408 | chr18:31920327-31920372                           | NM_153515:816             | Ammecr1l      | INSIDE                 | 1.079                                                        | 1.533                          | 1633.84            | 2504.64            | 1.654                          | 1132.02            | 1872.67            |
| A_68_P26459688 | chr9:42913910-42913954                            | NM_027144:-131            | Arhgef12      | PROMOTER               | 1.079                                                        | 2.318                          | 406.31             | 941.75             | 2.502                          | 531.04             | 1328.68            |
| A_68_P31564332 | chr18:25327565-25327609                           | NM_001033532:66           | AW554918      | INSIDE                 | 1.079                                                        | 1.955                          | 595.66             | 1164.41            | 2.109                          | 551.44             | 1163.19            |
| A_68_P25948481 | chr8:72406321-72406365                            | NM_026818:4949            | Cilp2         | INSIDE                 | 1.079                                                        | 2.303                          | 966.50             | 2225.58            | 2.484                          | 875.81             | 2175.71            |
| A_68_P24122107 | chr5:137044683-137044727                          | NM_009986:-1403           | Cux1          | PROMOTER               | 1.079                                                        | 1.641                          | 442.58             | 726.35             | 1.771                          | 436.97             | 773.82             |
| A_68_P30010734 | chr15:10399494-10399539                           | NM_030046:755             | Dnajc21       | INSIDE                 | 1.079                                                        | 2.893                          | 470.80             | 1361.79            | 3.121                          | 503.18             | 1570.42            |

| ProbeName      | Target position of probe on CpG island microarray | TargetID                | GeneSymbol    | CpG island Description | Ratio of relative methylation (TiO <sub>2</sub> -NP/Vehicle) | Sham group                     |                    |                    | TiO <sub>2</sub> -H group      |                    |                    |
|----------------|---------------------------------------------------|-------------------------|---------------|------------------------|--------------------------------------------------------------|--------------------------------|--------------------|--------------------|--------------------------------|--------------------|--------------------|
|                |                                                   |                         |               |                        |                                                              | Relative methylation (Cy5/Cy3) | Cy3 signal (Input) | Cy5 signal (MeDIP) | Relative methylation (Cy5/Cy3) | Cy3 signal (Input) | Cy5 signal (MeDIP) |
| A_68_P25565208 | chr7:144505952-144505996                          | NM_001113414:154        | Ebf3          | INSIDE                 | 1.079                                                        | 2.957                          | 598.24             | 1769.23            | 3.192                          | 563.20             | 1797.99            |
| A_68_P20562756 | chr1:122499449-122499493                          | NM_010133:407           | En1           | INSIDE                 | 1.079                                                        | 1.480                          | 1523.21            | 2254.00            | 1.597                          | 1317.12            | 2103.82            |
| A_68_P31214871 | chr17:48041296-48041340                           | NM_001110824:20263      | Foxp4         | INSIDE                 | 1.079                                                        | 1.418                          | 1234.48            | 1750.63            | 1.531                          | 971.42             | 1486.99            |
| A_68_P30580077 | chr16:18498909-18498953                           | NM_023120:-33           | Gnb11         | PROMOTER               | 1.079                                                        | 1.525                          | 921.52             | 1405.22            | 1.645                          | 843.32             | 1387.48            |
| A_68_P30482739 | chr15:99705810-99705854                           | NM_001113545:55         | Lima1         | INSIDE                 | 1.079                                                        | 1.401                          | 2145.87            | 3006.05            | 1.511                          | 1822.19            | 2753.12            |
| A_68_P29425004 | chr14:16271153-16271197                           | NM_146052:327           | Lrrc3b        | INSIDE                 | 1.079                                                        | 1.974                          | 1095.17            | 2161.49            | 2.129                          | 925.23             | 1970.21            |
| A_68_P27287759 | chr10:80616606-80616650                           | NM_021501:13837         | Pias4         | DOWNSTREAM             | 1.079                                                        | 2.959                          | 692.09             | 2048.17            | 3.193                          | 636.26             | 2031.37            |
| A_68_P30390280 | chr15:83555410-83555454                           | NM_022723:19            | Scube1        | INSIDE                 | 1.079                                                        | 2.419                          | 753.21             | 1821.69            | 2.608                          | 764.83             | 1995.01            |
| A_68_P26591325 | chr9:65972739-65972783                            | NM_019727:-67           | Snx1          | DIVERGENT_PROMOTER     | 1.079                                                        | 1.924                          | 2572.37            | 4949.01            | 2.076                          | 2215.56            | 4599.79            |
| A_68_P20322000 | chr1:69873617-69873661                            | NM_029160:77            | Spag16        | INSIDE                 | 1.079                                                        | 0.538                          | 1306.32            | 703.40             | 0.581                          | 1074.64            | 624.13             |
| A_68_P24593030 | chr6:83318306-83318350                            | NM_183138:73344         | Tet3          | INSIDE                 | 1.079                                                        | 2.358                          | 790.16             | 1863.46            | 2.545                          | 541.70             | 1378.72            |
| A_68_P27848242 | chr11:61221514-61221558                           | ENSMUST00000121719:8781 |               | DOWNSTREAM             | 1.079                                                        | 1.971                          | 588.37             | 1159.59            | 2.126                          | 543.62             | 1155.95            |
| A_68_P26347944 | chr9:21397144-21397188                            | NM_178619:1             | 1810026J23Rik | INSIDE                 | 1.078                                                        | 1.400                          | 1296.34            | 1814.42            | 1.509                          | 1053.54            | 1589.38            |
| A_68_P26242727 | chr8:126506886-126506930                          | NM_019552:114           | Abcb10        | INSIDE                 | 1.078                                                        | 1.899                          | 585.73             | 1112.47            | 2.047                          | 555.28             | 1136.82            |
| A_68_P25597930 | chr7:150154345-150154389                          | NM_008554:803           | Ascl2         | INSIDE                 | 1.078                                                        | 1.679                          | 552.15             | 927.15             | 1.809                          | 510.03             | 922.81             |
| A_68_P29369780 | chr13:119503164-119503208                         | NM_008002:-319          | Fgf10         | PROMOTER               | 1.078                                                        | 1.516                          | 1114.00            | 1688.30            | 1.634                          | 928.25             | 1516.71            |
| A_68_P29071667 | chr13:58229346-58229390                           | NM_029872:549           | Hnrpa0        | INSIDE                 | 1.078                                                        | 1.940                          | 1563.14            | 3032.76            | 2.092                          | 1369.68            | 2865.29            |
| A_68_P30433466 | chr15:90879641-90879685                           | NM_001109040:717        | Kif21a        | INSIDE                 | 1.078                                                        | 2.587                          | 1505.35            | 3893.82            | 2.788                          | 1061.34            | 2958.71            |
| A_68_P24385097 | chr6:39761053-39761097                            | NM_001010930:-139       | Mrps33        | PROMOTER               | 1.078                                                        | 1.674                          | 1580.80            | 2646.78            | 1.804                          | 1307.30            | 2358.52            |
| A_68_P20418213 | chr1:89406454-89406498                            | NM_019867:461           | Ngef          | INSIDE                 | 1.078                                                        | 0.554                          | 1066.15            | 590.96             | 0.598                          | 894.26             | 534.44             |
| A_68_P27483042 | chr10:117229727-117229771                         | NM_134010:13            | Nup107        | INSIDE                 | 1.078                                                        | 1.711                          | 723.11             | 1237.56            | 1.846                          | 720.16             | 1329.08            |
| A_68_P28946211 | chr13:36060705-36060749                           | NM_029628:952           | Ppp1r3g       | INSIDE                 | 1.078                                                        | 2.598                          | 870.26             | 2261.21            | 2.800                          | 730.42             | 2045.41            |
| A_68_P25427828 | chr7:120098728-120098772                          | NM_175279:1275          | Rassf10       | INSIDE                 | 1.078                                                        | 1.446                          | 734.25             | 1062.04            | 1.560                          | 649.71             | 1013.32            |
| A_68_P26872698 | chr9:119394966-119395010                          | NM_021544:93146         | Scn5a         | INSIDE                 | 1.078                                                        | 1.925                          | 817.81             | 1573.94            | 2.075                          | 645.15             | 1338.74            |
| A_68_P27630973 | chr11:20232357-20232401                           | NM_018861:338           | Slc1a4        | INSIDE                 | 1.078                                                        | 0.540                          | 1228.82            | 663.41             | 0.582                          | 1068.08            | 621.84             |
| A_68_P28357645 | chr12:37043657-37043701                           | NM_025312:2923          | Sostdc1       | INSIDE                 | 1.078                                                        | 1.680                          | 667.21             | 1121.04            | 1.811                          | 597.50             | 1082.35            |
| A_68_P31802712 | chr18:69505723-69505767                           | NM_001083967:370        | Tcf4          | INSIDE                 | 1.078                                                        | 0.628                          | 1732.31            | 1088.73            | 0.678                          | 1465.99            | 993.56             |
| A_68_P31201713 | chr17:45683888-45683932                           | NM_001013749:2716       | Tmem151b      | INSIDE                 | 1.078                                                        | 1.767                          | 562.80             | 994.66             | 1.905                          | 442.37             | 842.69             |
| A_68_P28159935 | chr11:116403194-116403238                         | NM_173755:39545         | Ube2o         | INSIDE                 | 1.078                                                        | 2.007                          | 1088.81            | 2185.09            | 2.164                          | 951.58             | 2058.87            |
| A_68_P25349897 | chr7:104474502-104474546                          | NM_001177412:-50        | Usp35         | DIVERGENT_PROMOTER     | 1.078                                                        | 2.459                          | 1831.48            | 4503.34            | 2.651                          | 1575.47            | 4175.82            |
| A_68_P22964623 | chr4:62131950-62131994                            | NM_023597:-66           | Wdr31         | DIVERGENT_PROMOTER     | 1.078                                                        | 2.056                          | 574.20             | 1180.53            | 2.217                          | 512.48             | 1135.98            |
| A_68_P29703312 | chr14:71166447-71166491                           | NM_023045:-33           | Xpo7          | DIVERGENT_PROMOTER     | 1.078                                                        | 2.789                          | 409.11             | 1140.91            | 3.006                          | 359.01             | 1079.07            |
| A_68_P31092440 | chr17:23713162-23713206                           | NM_011747:23270         | Zfp13         | INSIDE                 | 1.078                                                        | 2.504                          | 1189.02            | 2977.49            | 2.701                          | 965.76             | 2608.10            |
| A_68_P28336342 | chr12:33064298-33064342                           | NM_001162903:667        | 2010109K11Rik | INSIDE                 | 1.077                                                        | 2.382                          | 546.52             | 1302.02            | 2.566                          | 493.92             | 1267.26            |
| A_68_P22142066 | chr3:53282945-53282989                            | NM_173382:15228         | 2810046L04Rik | INSIDE                 | 1.077                                                        | 2.661                          | 2085.95            | 5549.77            | 2.865                          | 1645.65            | 4715.00            |
| A_68_P24008812 | chr5:115729714-115729758                          | NM_026504:26            | Coq5          | INSIDE                 | 1.077                                                        | 1.747                          | 671.62             | 1173.45            | 1.882                          | 655.67             | 1233.76            |
| A_68_P28446510 | chr12:55304616-55304660                           | NM_028133:223           | Egln3         | INSIDE                 | 1.077                                                        | 2.054                          | 522.12             | 1072.55            | 2.212                          | 508.72             | 1125.28            |
| A_68_P21874503 | chr2:174124272-174124316                          | NM_201617:935           | Gnas          | INSIDE                 | 1.077                                                        | 1.529                          | 684.87             | 1046.89            | 1.646                          | 615.93             | 1013.59            |
| A_68_P25090529 | chr7:52253176-52253220                            | NM_016849:169           | Irf3          | INSIDE                 | 1.077                                                        | 3.535                          | 1325.06            | 4684.13            | 3.806                          | 1166.81            | 4441.09            |
| A_68_P21840390 | chr2:168088577-168088621                          | NM_001081134:6233       | Keng1         | INSIDE                 | 1.077                                                        | 3.037                          | 4213.25            | 12796.91           | 3.271                          | 3132.88            | 10248.27           |
| A_68_P26321969 | chr9:15083907-15083951                            | NM_144933:383           | Med17         | INSIDE                 | 1.077                                                        | 2.562                          | 373.86             | 957.76             | 2.758                          | 307.90             | 849.21             |
| A_68_P32266426 | chrX:13063861-13063905                            | NM_173415:19085         | Nyx           | INSIDE                 | 1.077                                                        | 2.471                          | 535.52             | 1323.03            | 2.660                          | 274.70             | 730.75             |
| A_68_P20614487 | chr1:133142076-133142120                          | NM_018750:-343          | Rassf5        | PROMOTER               | 1.077                                                        | 0.578                          | 1301.26            | 751.59             | 0.622                          | 1038.32            | 646.09             |
| A_68_P25414288 | chr7:117758585-117758629                          | NM_177324:-172          | Sbf2          | PROMOTER               | 1.077                                                        | 2.206                          | 783.19             | 1727.71            | 2.377                          | 731.47             | 1738.51            |
| A_68_P21266438 | chr2:61649821-61649865                            | NM_009322:7333          | Tbr1          | INSIDE                 | 1.077                                                        | 2.900                          | 603.50             | 1750.02            | 3.123                          | 553.44             | 1728.40            |
| A_68_P28538087 | chr12:74646709-74646753                           | NM_178715:652           | Tmem30b       | INSIDE                 | 1.077                                                        | 2.743                          | 759.87             | 2084.56            | 2.955                          | 637.27             | 1883.10            |
| A_68_P26154295 | chr8:111474184-111474229                          | NM_007496:235663        | Zfxh3         | INSIDE                 | 1.077                                                        | 3.115                          | 1123.79            | 3500.89            | 3.356                          | 883.92             | 2966.63            |
| A_68_P31092622 | chr17:23747282-23747326                           | NM_001033425:9482       | Zscan10       | INSIDE                 | 1.077                                                        | 1.982                          | 747.96             | 1482.47            | 2.135                          | 606.33             | 1294.51            |
| A_68_P32554231 | chrX:96412395-96412439                            |                         | Unknown       |                        | 1.077                                                        | 2.034                          | 2212.71            | 4501.10            | 2.192                          | 1277.74            | 2800.61            |
| A_68_P29102523 | chr13:65361108-65361152                           | ENSMUST00000099425:284  |               | INSIDE                 | 1.077                                                        | 1.912                          | 464.78             | 888.47             | 2.058                          | 410.84             | 845.70             |
| A_68_P23801180 | chr5:74488973-74489017                            | NR_015531:-113          | 2700023E23Rik | PROMOTER               | 1.076                                                        | 2.452                          | 1241.04            | 3042.83            | 2.639                          | 1069.01            | 2821.04            |

| ProbeName      | Target position of probe on CpG island microarray | TargetID           | GeneSymbol    | CpG island Description | Ratio of relative methylation (TiO <sub>2</sub> -NP/Vehicle) | Sham group                     |                    |                    | TiO <sub>2</sub> -H group      |                    |                    |
|----------------|---------------------------------------------------|--------------------|---------------|------------------------|--------------------------------------------------------------|--------------------------------|--------------------|--------------------|--------------------------------|--------------------|--------------------|
|                |                                                   |                    |               |                        |                                                              | Relative methylation (Cy5/Cy3) | Cy3 signal (Input) | Cy5 signal (MeDIP) | Relative methylation (Cy5/Cy3) | Cy3 signal (Input) | Cy5 signal (MeDIP) |
| A_68_P31499176 | chr18:12327130-12327174                           | NM_029623:-86      | 3110002H16Rik | PROMOTER               | 1.076                                                        | 1.704                          | 536.63             | 914.34             | 1.834                          | 497.05             | 911.51             |
| A_68_P32143650 | chr19:46469545-46469589                           | NM_016860:659      | Actr1a        | INSIDE                 | 1.076                                                        | 4.088                          | 3386.97            | 13844.71           | 4.397                          | 2397.83            | 10544.04           |
| A_68_P30645474 | chr16:31081440-31081484                           | NM_198626:56       | Al480653      | INSIDE                 | 1.076                                                        | 3.419                          | 762.59             | 2607.41            | 3.680                          | 634.02             | 2333.29            |
| A_68_P24735709 | chr6:108733062-108733106                          | NM_026011:32       | Ar18b         | INSIDE                 | 1.076                                                        | 0.643                          | 1563.37            | 1004.57            | 0.692                          | 1296.01            | 896.31             |
| A_68_P24800930 | chr6:120866663-120866707                          | NM_007544:154      | Bid           | INSIDE                 | 1.076                                                        | 1.426                          | 2162.82            | 3085.01            | 1.535                          | 1746.23            | 2681.08            |
| A_68_P24631554 | chr6:90259619-90259663                            | NM_027928:15539    | Chst13        | INSIDE                 | 1.076                                                        | 2.274                          | 555.12             | 1262.56            | 2.447                          | 549.58             | 1344.71            |
| A_68_P25371478 | chr7:108257374-108257418                          | NM_001146010:108   | Fchs2         | INSIDE                 | 1.076                                                        | 1.650                          | 2019.03            | 3330.68            | 1.775                          | 1526.09            | 2708.13            |
| A_68_P30631086 | chr16:28564499-28564543                           | NM_010199:188768   | Fgf12         | INSIDE                 | 1.076                                                        | 2.233                          | 764.97             | 1708.10            | 2.402                          | 672.14             | 1614.74            |
| A_68_P28293548 | chr12:25785727-25785771                           | NM_010496:-4791    | Id2           | PROMOTER               | 1.076                                                        | 2.409                          | 2706.49            | 6519.67            | 2.592                          | 2173.80            | 5634.35            |
| A_68_P25095112 | chr7:53050502-53050546                            | NM_001005511:11208 | Lmtk3         | INSIDE                 | 1.076                                                        | 2.825                          | 935.66             | 2643.11            | 3.039                          | 808.11             | 2455.56            |
| A_68_P23428418 | chr4:153386065-153386109                          | NM_201226:175      | Lrrc47        | INSIDE                 | 1.076                                                        | 4.769                          | 644.55             | 3073.55            | 5.130                          | 530.64             | 2722.12            |
| A_68_P25424701 | chr7:119571229-119571273                          | NM_020606:31       | Parva         | INSIDE                 | 1.076                                                        | 1.728                          | 716.98             | 1238.97            | 1.860                          | 583.11             | 1084.57            |
| A_68_P27230712 | chr10:70062823-70062867                           | NM_178621:-805     | Phyhipl       | PROMOTER               | 1.076                                                        | 1.509                          | 1085.49            | 1637.65            | 1.624                          | 951.35             | 1544.51            |
| A_68_P27901222 | chr11:70353684-70353728                           | NM_008876:41       | Pld2          | INSIDE                 | 1.076                                                        | 0.586                          | 1130.51            | 662.51             | 0.630                          | 929.07             | 585.65             |
| A_68_P31107656 | chr17:26122124-26122168                           | NM_153140:36659    | Rab11fip3     | DOWNSTREAM             | 1.076                                                        | 1.519                          | 1016.75            | 1544.33            | 1.635                          | 871.14             | 1424.14            |
| A_68_P26579233 | chr9:63801395-63801439                            | NM_008542:68450    | Smad6         | INSIDE                 | 1.076                                                        | 1.661                          | 828.55             | 1376.32            | 1.787                          | 785.52             | 1403.60            |
| A_68_P27992700 | chr11:86940726-86940770                           | NM_197987:170      | Trim37        | INSIDE                 | 1.076                                                        | 6.146                          | 231.32             | 1421.65            | 6.615                          | 258.04             | 1707.03            |
| A_68_P24428347 | chr6:48569751-48569795                            | NM_173429:6594     | Zfp775        | INSIDE                 | 1.076                                                        | 1.977                          | 783.47             | 1549.15            | 2.128                          | 604.91             | 1287.51            |
| A_68_P20038596 | A_68_P20038596                                    |                    |               | Unknown                | 1.076                                                        | 1.638                          | 817.49             | 1339.39            | 1.762                          | 747.56             | 1317.46            |
| A_68_P24059259 | chr5:124540142-124540186                          | NM_019875:5643     | Abcb9         | INSIDE                 | 1.075                                                        | 2.290                          | 1497.55            | 3429.39            | 2.462                          | 1143.95            | 2816.15            |
| A_68_P22321216 | chr3:89519299-89519343                            | NM_001038587:377   | Adar          | INSIDE                 | 1.075                                                        | 2.404                          | 904.82             | 2175.30            | 2.585                          | 816.35             | 2110.58            |
| A_68_P28751741 | chr12:113912366-113912410                         | NM_001165894:99    | Akt1          | INSIDE                 | 1.075                                                        | 1.850                          | 565.86             | 1046.91            | 1.989                          | 554.20             | 1102.27            |
| A_68_P30542889 | chr16:10545693-10545737                           | NM_001204229:283   | Clec16a       | INSIDE                 | 1.075                                                        | 0.565                          | 1526.95            | 862.85             | 0.607                          | 1143.88            | 694.64             |
| A_68_P23279249 | chr4:125963943-125963987                          | NM_199473:-73      | Col8a2        | PROMOTER               | 1.075                                                        | 3.385                          | 2655.88            | 8990.38            | 3.638                          | 2397.93            | 8724.28            |
| A_68_P26543014 | chr9:57493074-57493118                            | NM_007783:-109     | Csk           | PROMOTER               | 1.075                                                        | 0.482                          | 1192.25            | 575.02             | 0.518                          | 985.15             | 510.72             |
| A_68_P31161105 | chr17:35960212-35960256                           | NM_008027:-67      | Flot1         | PROMOTER               | 1.075                                                        | 1.463                          | 899.60             | 1315.98            | 1.573                          | 860.01             | 1353.00            |
| A_68_P29257128 | chr13:99125244-99125288                           | NM_008242:1067     | Foxd1         | INSIDE                 | 1.075                                                        | 1.950                          | 1163.48            | 2269.12            | 2.096                          | 1029.83            | 2159.02            |
| A_68_P25951930 | chr8:72975613-72975657                            | NM_001122830:25208 | Klhl26        | INSIDE                 | 1.075                                                        | 1.620                          | 904.54             | 1465.51            | 1.742                          | 855.74             | 1490.99            |
| A_68_P24378360 | chr6:38586324-38586368                            | NM_001033171:893   | Klrg2         | INSIDE                 | 1.075                                                        | 0.557                          | 1057.67            | 589.12             | 0.599                          | 965.04             | 577.67             |
| A_68_P28582490 | chr12:82833202-82833246                           | NM_001174107:48933 | Map3k9        | INSIDE                 | 1.075                                                        | 2.320                          | 342.41             | 794.50             | 2.493                          | 331.86             | 827.41             |
| A_68_P27854128 | chr11:62271118-62271162                           | NM_011308:-306     | Neor1         | DIVERGENT_PROMOTER     | 1.075                                                        | 2.116                          | 518.80             | 1097.80            | 2.275                          | 474.78             | 1080.12            |
| A_68_P24477532 | chr6:56873994-56874038                            | NM_026004:-90      | Nt5c3         | PROMOTER               | 1.075                                                        | 2.384                          | 315.92             | 753.10             | 2.563                          | 321.98             | 825.27             |
| A_68_P30346595 | chr15:76009519-76009563                           | NM_201394:16600    | Plec          | INSIDE                 | 1.075                                                        | 3.383                          | 964.85             | 3263.94            | 3.637                          | 848.06             | 3084.08            |
| A_68_P30651713 | chr16:32277691-32277735                           | NM_027355:166      | Rnf168        | INSIDE                 | 1.075                                                        | 1.398                          | 1089.18            | 1522.73            | 1.503                          | 1021.13            | 1534.57            |
| A_68_P23491409 | chr5:14025282-14025326                            | NM_011348:29       | Sema3e        | INSIDE                 | 1.075                                                        | 1.411                          | 2172.41            | 3065.14            | 1.517                          | 1906.94            | 2892.16            |
| A_68_P25584911 | chr7:147973663-147973707                          | NM_001143765:69    | Syce1         | INSIDE                 | 1.075                                                        | 2.629                          | 765.88             | 2013.22            | 2.826                          | 675.00             | 1907.22            |
| A_68_P24374363 | chr6:37821300-37821344                            | NM_145076:512      | Trim24        | INSIDE                 | 1.075                                                        | 2.037                          | 2161.44            | 4403.23            | 2.191                          | 1896.05            | 4153.95            |
| A_68_P30363494 | chr15:78798409-78798453                           | NM_001039155:20277 | Triobp        | INSIDE                 | 1.075                                                        | 2.911                          | 4576.66            | 13321.16           | 3.128                          | 3181.12            | 9950.05            |
| A_68_P31323665 | chr17:69732730-69732774                           | NM_009547:-565     | Zfp161        | PROMOTER               | 1.075                                                        | 0.626                          | 3053.22            | 1909.84            | 0.672                          | 2725.38            | 1832.44            |
| A_68_P27033722 | chr10:28916520-28916567                           | NM_026138:52742    | 6330407J23Rik | INSIDE                 | 1.074                                                        | 1.710                          | 1249.87            | 2137.50            | 1.837                          | 1023.13            | 1879.42            |
| A_68_P25614033 | chr8:3452130-3452174                              | NM_133962:59145    | Arhgef18      | INSIDE                 | 1.074                                                        | 1.960                          | 997.98             | 1956.00            | 2.106                          | 795.20             | 1674.63            |
| A_68_P31038473 | chr17:10512600-10512644                           | NR_037588:-161     | B930003M22Rik | DIVERGENT_PROMOTER     | 1.074                                                        | 1.612                          | 470.29             | 758.22             | 1.732                          | 458.84             | 794.52             |
| A_68_P28724519 | chr12:109154477-109154521                         | NM_001079883:87126 | Bcl11b        | INSIDE                 | 1.074                                                        | 2.790                          | 2650.28            | 7393.52            | 2.996                          | 2141.19            | 6414.49            |
| A_68_P23397278 | chr4:148274906-148274950                          | NM_027195:96428    | Cas21         | INSIDE                 | 1.074                                                        | 3.590                          | 4243.14            | 15231.23           | 3.855                          | 3263.12            | 12578.86           |
| A_68_P25637616 | chr8:8660606-8660650                              | NM_010111:145      | Efnb2         | INSIDE                 | 1.074                                                        | 1.495                          | 1235.25            | 1846.59            | 1.606                          | 1131.29            | 1816.36            |
| A_68_P23227298 | chr4:115690557-115690601                          | NM_010173:-71      | Faah          | PROMOTER               | 1.074                                                        | 2.041                          | 563.15             | 1149.64            | 2.192                          | 547.15             | 1199.43            |
| A_68_P28577489 | chr12:81861416-81861460                           | NM_001008423:264   | Gm1568        | INSIDE                 | 1.074                                                        | 2.530                          | 1439.51            | 3642.27            | 2.717                          | 1197.06            | 3252.59            |
| A_68_P24637119 | chr6:91106721-91106765                            | NM_144919:-66      | Hdac11        | PROMOTER               | 1.074                                                        | 2.520                          | 1255.28            | 3612.76            | 2.707                          | 1083.44            | 2933.12            |
| A_68_P24483218 | chr6:58781700-58781744                            | NM_028705:-1971    | Herc3         | PROMOTER               | 1.074                                                        | 2.150                          | 795.93             | 1711.36            | 2.310                          | 686.71             | 1586.40            |
| A_68_P26400214 | chr9:31193743-31193787                            | NM_172766:-12      | Nfrikb        | PROMOTER               | 1.074                                                        | 2.276                          | 1066.76            | 2427.81            | 2.445                          | 924.86             | 2261.53            |
| A_68_P23435438 | chr4:154358119-154358163                          | NM_001113360:26953 | Ptch2         | INSIDE                 | 1.074                                                        | 2.426                          | 638.97             | 1550.26            | 2.605                          | 558.84             | 1455.73            |

| ProbeName      | Target position of probe on CpG island microarray | TargetID                 | GeneSymbol    | CpG island Description | Ratio of relative methylation (TiO <sub>2</sub> -NP/Vehicle) | Sham group                     |                    |                    | TiO <sub>2</sub> -H group      |                    |                    |
|----------------|---------------------------------------------------|--------------------------|---------------|------------------------|--------------------------------------------------------------|--------------------------------|--------------------|--------------------|--------------------------------|--------------------|--------------------|
|                |                                                   |                          |               |                        |                                                              | Relative methylation (Cy5/Cy3) | Cy3 signal (Input) | Cy5 signal (MeDIP) | Relative methylation (Cy5/Cy3) | Cy3 signal (Input) | Cy5 signal (MeDIP) |
| A_68_P25499768 | chr7:133436020-133436064                          | NM_145587:19910          | Sbk1          | INSIDE                 | 1.074                                                        | 2.866                          | 705.12             | 2020.95            | 3.079                          | 598.49             | 1842.91            |
| A_68_P25090605 | chr7:52263349-52263393                            | NM_001008422:8249        | Scaf1         | INSIDE                 | 1.074                                                        | 2.232                          | 558.85             | 1247.24            | 2.396                          | 494.64             | 1185.27            |
| A_68_P31202055 | chr17:45732191-45732235                           | NM_001199113:-1623       | Ste29a1       | PROMOTER               | 1.074                                                        | 1.837                          | 1381.82            | 2537.95            | 1.973                          | 1142.71            | 2254.56            |
| A_68_P29286847 | chr13:104563945-104563989                         | NM_172592:-9304          | Srekl1        | PROMOTER               | 1.074                                                        | 1.489                          | 2351.32            | 3500.96            | 1.599                          | 1663.25            | 2663.25            |
| A_68_P31175226 | chr17:39982856-39982900                           | ENSMUST00000157647:-1192 |               | PROMOTER               | 1.074                                                        | 2.067                          | 51240.87           | 105902.50          | 2.220                          | 40303.34           | 89483.25           |
| A_68_P23438433 | chr4:154783299-154783343                          | NM_001166029:22          | 2010015L04Rik | INSIDE                 | 1.073                                                        | 0.571                          | 1323.91            | 755.64             | 0.613                          | 1052.35            | 644.56             |
| A_68_P30728224 | chr16:45742850-45742894                           | NM_172511:147            | Abhd10        | INSIDE                 | 1.073                                                        | 1.996                          | 1583.16            | 3160.57            | 2.142                          | 1394.50            | 2986.70            |
| A_68_P28071366 | chr11:100870700-100870746                         | NM_016920:-46            | Atp6v0a1      | PROMOTER               | 1.073                                                        | 6.364                          | 1580.45            | 10058.17           | 6.830                          | 1232.12            | 8415.00            |
| A_68_P32289635 | chrX:20265624-20265668                            | NM_011049:28             | Cdk16         | INSIDE                 | 1.073                                                        | 2.414                          | 723.96             | 1747.80            | 2.590                          | 412.28             | 1067.70            |
| A_68_P30486146 | chr15:100325931-100325975                         | NM_153407:-282           | Csrp2         | PROMOTER               | 1.073                                                        | 0.584                          | 1409.79            | 822.86             | 0.626                          | 1104.17            | 691.70             |
| A_68_P29241522 | chr13:96374151-96374199                           | NM_010169:14214          | F2r           | INSIDE                 | 1.073                                                        | 3.436                          | 1403.80            | 4823.40            | 3.685                          | 1042.39            | 3841.51            |
| A_68_P32028427 | chr19:25311713-25311757                           | NM_181404:43             | Kank1         | INSIDE                 | 1.073                                                        | 1.592                          | 1172.85            | 1867.71            | 1.708                          | 1084.53            | 1852.50            |
| A_68_P24776189 | chr6:116288297-116288341                          | NM_027920:178            | Marchf8       | INSIDE                 | 1.073                                                        | 1.683                          | 1662.62            | 2798.91            | 1.807                          | 1480.71            | 2675.06            |
| A_68_P24333874 | chr6:30688204-30688248                            | NR_029900:-3072          | Mir335        | PROMOTER               | 1.073                                                        | 2.065                          | 405.20             | 836.80             | 2.217                          | 366.46             | 812.31             |
| A_68_P31127485 | chr17:29484900-29484944                           | NM_019880:-73            | Mtch1         | PROMOTER               | 1.073                                                        | 1.846                          | 1536.11            | 2836.39            | 1.982                          | 1213.50            | 2405.24            |
| A_68_P25846164 | chr8:49313858-49313902                            | NM_001145937:446164      | Odz3          | INSIDE                 | 1.073                                                        | 1.720                          | 1092.17            | 1878.99            | 1.846                          | 1232.93            | 1521.27            |
| A_68_P26573399 | chr9:62828500-62828544                            | NM_019663:164            | Pias1         | INSIDE                 | 1.073                                                        | 1.763                          | 2345.69            | 4134.86            | 1.892                          | 2086.12            | 3946.98            |
| A_68_P22522616 | chr3:129582033-129582077                          | NM_183423:-2047          | Pla2g12a      | PROMOTER               | 1.073                                                        | 7.093                          | 13889.41           | 98523.11           | 7.608                          | 8851.94            | 67343.55           |
| A_68_P28186391 | chr11:120582930-120582974                         | NM_133223:171            | Rac3          | INSIDE                 | 1.073                                                        | 2.156                          | 1843.94            | 3976.11            | 2.313                          | 1501.64            | 3473.02            |
| A_68_P32790793 | chrX:159198362-159198406                          | NM_009031:81             | Rbbp7         | INSIDE                 | 1.073                                                        | 2.663                          | 296.30             | 789.04             | 2.856                          | 199.67             | 570.28             |
| A_68_P29871953 | chr14:104921479-104921523                         | NM_026047:383            | Rnf219        | INSIDE                 | 1.073                                                        | 1.629                          | 465.37             | 758.21             | 1.748                          | 428.73             | 749.31             |
| A_68_P21095250 | chr2:28980805-28980849                            | NM_198033:315            | Setx          | INSIDE                 | 1.073                                                        | 2.593                          | 1350.45            | 3501.48            | 2.782                          | 1105.95            | 3077.07            |
| A_68_P20038599 | chr1:12982807-12982851                            | NM_172841:-1612          | Sleo5a1       | PROMOTER               | 1.073                                                        | 3.350                          | 6202.21            | 20776.82           | 3.594                          | 4614.42            | 16586.42           |
| A_68_P32464772 | chrX:71032781-71032825                            | NM_009279:321            | Ssr4          | INSIDE                 | 1.073                                                        | 1.494                          | 1004.81            | 1501.53            | 1.603                          | 588.72             | 943.93             |
| A_68_P32341134 | chrX:39503420-39503464                            | NM_021465:-435           | Stag2         | PROMOTER               | 1.073                                                        | 2.332                          | 627.42             | 1463.19            | 2.502                          | 425.17             | 1063.94            |
| A_68_P24636064 | chr6:90937651-90937695                            |                          |               | Unknown                | 1.073                                                        | 1.900                          | 1116.61            | 2121.45            | 2.038                          | 973.01             | 1982.95            |
| A_68_P21836345 | chr2:167422781-167422825                          | ENSMUST00000127006:43989 |               | INSIDE                 | 1.073                                                        | 3.956                          | 1989.37            | 7869.04            | 4.246                          | 1491.25            | 6331.42            |
| A_68_P26807592 | chr9:107199260-107199304                          | NM_009895:263            | Cish          | INSIDE                 | 1.072                                                        | 1.520                          | 3516.66            | 5345.27            | 1.629                          | 2706.95            | 4410.47            |
| A_68_P30495773 | chr15:101904768-101904812                         | NM_145625:587            | Eif4b         | INSIDE                 | 1.072                                                        | 0.291                          | 1925.63            | 560.02             | 0.312                          | 1710.09            | 533.01             |
| A_68_P24112562 | chr5:134789379-134789423                          | NM_001080746:1216        | Gtf2i         | INSIDE                 | 1.072                                                        | 2.096                          | 790.98             | 1658.23            | 2.248                          | 707.85             | 1591.16            |
| A_68_P24634435 | chr6:90687050-90687094                            | NM_001134384:73045       | Iqsec1        | INSIDE                 | 1.072                                                        | 2.378                          | 505.07             | 1200.99            | 2.549                          | 519.28             | 1323.41            |
| A_68_P32016045 | chr19:23210547-23210591                           | NM_010638:-5147          | Klf9          | PROMOTER               | 1.072                                                        | 2.519                          | 610.54             | 1538.06            | 2.700                          | 608.50             | 1643.02            |
| A_68_P27971661 | chr11:83276581-83276625                           | NM_080453:-139           | Mmp28         | PROMOTER               | 1.072                                                        | 1.355                          | 1879.87            | 2547.96            | 1.454                          | 1684.99            | 2449.36            |
| A_68_P29368026 | chr13:119175523-119175567                         | NM_021556:515            | Mrps30        | INSIDE                 | 1.072                                                        | 2.987                          | 863.92             | 2580.19            | 3.202                          | 800.26             | 2562.16            |
| A_68_P32266425 | chrX:13063695-13063739                            | NM_173415:18919          | Nyx           | INSIDE                 | 1.072                                                        | 2.416                          | 982.29             | 2372.88            | 2.589                          | 562.57             | 1456.42            |
| A_68_P29056696 | chr13:55828862-55828906                           | NM_028281:156            | Pebd2         | INSIDE                 | 1.072                                                        | 2.246                          | 597.22             | 1341.65            | 2.408                          | 601.40             | 1448.34            |
| A_68_P31106582 | chr17:25969835-25969879                           | NM_019719:450            | Stub1         | INSIDE                 | 1.072                                                        | 2.136                          | 1107.61            | 2366.10            | 2.289                          | 952.01             | 2179.23            |
| A_68_P26037062 | chr8:90305072-90305116                            | NM_033327:178400         | Zfp423        | INSIDE                 | 1.072                                                        | 2.129                          | 646.97             | 1377.45            | 2.282                          | 570.51             | 1302.04            |
| A_68_P27534005 | chr10:126528987-126529031                         | NM_001033263:13046       | Agap2         | INSIDE                 | 1.071                                                        | 1.944                          | 12855.71           | 24996.72           | 2.083                          | 9244.10            | 19256.38           |
| A_68_P27298385 | chr10:83111453-83111497                           | NM_145220:-65            | App12         | PROMOTER               | 1.071                                                        | 1.942                          | 435.80             | 846.21             | 2.079                          | 326.23             | 678.12             |
| A_68_P28450019 | chr12:56086318-56086362                           | NM_013815:983            | Baz1a         | INSIDE                 | 1.071                                                        | 1.656                          | 544.69             | 901.83             | 1.774                          | 512.86             | 909.78             |
| A_68_P30480361 | chr15:99300972-99301016                           | NM_029236:4167           | Bedm3d        | INSIDE                 | 1.071                                                        | 2.525                          | 648.39             | 1637.22            | 2.704                          | 575.58             | 1556.42            |
| A_68_P27674147 | chr11:29273422-29273466                           | NM_176841:-330           | Ccdc88a       | PROMOTER               | 1.071                                                        | 2.303                          | 923.17             | 2126.28            | 2.466                          | 864.44             | 2131.50            |
| A_68_P28853776 | chr13:17895335-17895379                           | NM_001081058:1575        | Cdk13         | INSIDE                 | 1.071                                                        | 2.216                          | 564.66             | 1251.35            | 2.374                          | 463.42             | 1100.04            |
| A_68_P31227869 | chr17:50432800-50432844                           | NM_010021:102            | Dazl          | INSIDE                 | 1.071                                                        | 2.893                          | 591.71             | 1711.96            | 3.098                          | 486.05             | 1505.99            |
| A_68_P30483524 | chr15:99869292-99869336                           | NM_001159361:220         | Dip2b         | INSIDE                 | 1.071                                                        | 3.295                          | 1462.67            | 4819.15            | 3.528                          | 1311.32            | 4626.49            |
| A_68_P23317858 | chr4:133042766-133042810                          | NM_175307:6741           | Fam46b        | INSIDE                 | 1.071                                                        | 1.791                          | 473.57             | 848.26             | 1.919                          | 427.24             | 819.90             |
| A_68_P26550035 | chr9:58671367-58671411                            | NM_001081192:70          | Hcn4          | INSIDE                 | 1.071                                                        | 1.689                          | 1976.89            | 3338.64            | 1.809                          | 1485.12            | 2686.89            |
| A_68_P25005393 | chr7:25318304-25318348                            | NM_153134:2660           | Irgq          | INSIDE                 | 1.071                                                        | 1.927                          | 555.56             | 1070.73            | 2.063                          | 482.73             | 996.05             |
| A_68_P29725072 | chr14:75346702-75346746                           | NM_001033439:960         | Lrchl1        | INSIDE                 | 1.071                                                        | 1.657                          | 818.49             | 1356.26            | 1.774                          | 803.53             | 1425.41            |
| A_68_P21421185 | chr2:91022943-91022987                            | NM_001177720:-3486       | Madd          | PROMOTER               | 1.071                                                        | 3.002                          | 1125.65            | 3379.66            | 3.216                          | 975.03             | 3135.34            |



| ProbeName      | Target position of probe on CpG island microarray | TargetID                  | GeneSymbol    | CpG island Description | Ratio of relative methylation (TiO <sub>2</sub> -NP/Vehicle) | Sham group                     |                    |                    | TiO <sub>2</sub> -H group      |                    |                    |
|----------------|---------------------------------------------------|---------------------------|---------------|------------------------|--------------------------------------------------------------|--------------------------------|--------------------|--------------------|--------------------------------|--------------------|--------------------|
|                |                                                   |                           |               |                        |                                                              | Relative methylation (Cy5/Cy3) | Cy3 signal (Input) | Cy5 signal (MeDIP) | Relative methylation (Cy5/Cy3) | Cy3 signal (Input) | Cy5 signal (MeDIP) |
| A_68_P25956626 | chr8:73904570-73904614                            | NM_010150:1259            | Nr2f6         | INSIDE                 | 1.071                                                        | 1.990                          | 658.39             | 1310.35            | 2.131                          | 581.25             | 1238.39            |
| A_68_P21095669 | chr2:29050154-29050198                            | NM_133500:53384           | Ntng2         | DOWNSTREAM             | 1.071                                                        | 1.693                          | 1465.30            | 2481.14            | 1.814                          | 1219.03            | 2211.03            |
| A_68_P26504100 | chr9:50336652-50336696                            | NM_011220:72              | Pts           | INSIDE                 | 1.071                                                        | 2.247                          | 513.32             | 1153.34            | 2.406                          | 472.49             | 1136.98            |
| A_68_P26165185 | chr8:113370432-113370477                          | NR_028559:7956            | Snord111      | PROMOTER               | 1.071                                                        | 0.562                          | 1168.45            | 656.78             | 0.602                          | 1106.26            | 665.91             |
| A_68_P30253390 | chr15:59146277-59146321                           | NM_009270:348             | Sqle          | PROMOTER               | 1.071                                                        | 1.662                          | 851.93             | 1415.64            | 1.780                          | 723.87             | 1288.32            |
| A_68_P31612301 | chr18:34490799-34490843                           | NM_025527:22              | Srp19         | INSIDE                 | 1.071                                                        | 2.056                          | 1161.83            | 2389.23            | 2.201                          | 975.79             | 2148.17            |
| A_68_P30250405 | chr15:58655411-58655455                           | NM_175212:450             | Tmem65        | PROMOTER               | 1.071                                                        | 1.806                          | 830.32             | 1499.75            | 1.935                          | 683.58             | 1322.54            |
| A_68_P24428346 | chr6:48569573-48569617                            | NM_173429:6416            | Zfp775        | INSIDE                 | 1.071                                                        | 1.804                          | 411.54             | 742.26             | 1.931                          | 314.33             | 607.02             |
| A_68_P32462527 | chrX:70667702-70667746                            | NM_009566:11283           | Zfp92         | INSIDE                 | 1.071                                                        | 1.685                          | 1026.63            | 1729.37            | 1.804                          | 494.28             | 891.53             |
| A_68_P32783799 | chrX:157736143-157736189                          | ENSMUST00000141946:10779  |               | INSIDE                 | 1.071                                                        | 3.167                          | 1363.28            | 4317.58            | 3.391                          | 568.23             | 1926.81            |
| A_68_P32319554 | chrX:34185327-34185371                            | NM_001081956:61           | Akap17b       | INSIDE                 | 1.070                                                        | 1.844                          | 825.37             | 1521.95            | 1.973                          | 477.44             | 941.88             |
| A_68_P24046043 | chr5:122162421-122162465                          | NM_009125:825             | Atxn2         | INSIDE                 | 1.070                                                        | 2.130                          | 1666.70            | 3549.36            | 2.279                          | 1404.11            | 3200.24            |
| A_68_P24946541 | chr7:3597064-3597108                              | NM_146176:216             | Cnot3         | INSIDE                 | 1.070                                                        | 1.908                          | 461.46             | 880.33             | 2.041                          | 361.20             | 737.32             |
| A_68_P23417815 | chr4:151671322-151671366                          | NM_133788:22              | Icmt          | INSIDE                 | 1.070                                                        | 2.202                          | 809.29             | 1782.35            | 2.357                          | 727.75             | 1715.59            |
| A_68_P21908760 | chr2:180869636-180869680                          | NM_001003824:272          | Kenq2         | INSIDE                 | 1.070                                                        | 2.253                          | 545.18             | 1228.40            | 2.412                          | 503.17             | 1213.43            |
| A_68_P25954900 | chr8:73438460-73438504                            | NM_173013:8610            | Mtap1s        | INSIDE                 | 1.070                                                        | 2.439                          | 1248.31            | 3044.72            | 2.609                          | 1034.02            | 2697.92            |
| A_68_P26133402 | chr8:107898609-107898653                          | NM_001081333:650          | Plekhg4       | PROMOTER               | 1.070                                                        | 1.966                          | 2703.44            | 5315.59            | 2.104                          | 2276.92            | 4791.54            |
| A_68_P26453529 | chr9:41932012-41932056                            | NM_011436:338             | Sor11         | INSIDE                 | 1.070                                                        | 2.168                          | 652.09             | 1413.91            | 2.319                          | 624.90             | 1449.43            |
| A_68_P25508613 | chr7:135153669-135153713                          | NM_001079932:5799         | Trim72        | INSIDE                 | 1.070                                                        | 2.699                          | 4632.02            | 12500.85           | 2.887                          | 3522.92            | 10169.13           |
| A_68_P24124221 | chr5:137507075-137507119                          | NM_001039385:932          | Vgf           | INSIDE                 | 1.070                                                        | 1.416                          | 899.29             | 1273.07            | 1.514                          | 896.06             | 1356.98            |
| A_68_P31925604 | chr19:4878831-4878875                             | NM_001168517:163          | Zdhhc24       | INSIDE                 | 1.070                                                        | 1.825                          | 2497.29            | 4557.02            | 1.952                          | 2035.55            | 3973.72            |
| A_68_P26077485 | chr8:96958377-96958421                            | NR_015514:605             | 9330175E14Rik | INSIDE                 | 1.069                                                        | 2.252                          | 3191.46            | 7186.08            | 2.407                          | 2541.57            | 6118.28            |
| A_68_P29523396 | chr14:34133331-34133375                           | NM_153800:103344          | Arhgap22      | INSIDE                 | 1.069                                                        | 0.613                          | 1444.11            | 885.39             | 0.655                          | 1243.71            | 814.90             |
| A_68_P31369867 | chr17:78599714-78599758                           | NM_015800:149             | Crim1         | INSIDE                 | 1.069                                                        | 1.578                          | 1214.56            | 1916.59            | 1.688                          | 1156.97            | 1952.47            |
| A_68_P29335935 | chr13:113442657-113442701                         | NM_001145885:160          | Ddx4          | DIVERGENT_PROMOTER     | 1.069                                                        | 2.259                          | 452.55             | 1022.28            | 2.415                          | 435.72             | 1052.33            |
| A_68_P25547706 | chr7:141862876-141862920                          | NM_001033420:529          | Dock1         | INSIDE                 | 1.069                                                        | 1.753                          | 929.22             | 1629.38            | 1.874                          | 864.22             | 1619.67            |
| A_68_P27997243 | chr11:87800391-87800435                           | NM_001168472:325          | Dynll2        | PROMOTER               | 1.069                                                        | 0.479                          | 2199.34            | 1054.57            | 0.513                          | 1883.23            | 965.68             |
| A_68_P26986428 | chr10:20067570-20067614                           | NM_027930:32              | Fam54a        | PROMOTER               | 1.069                                                        | 1.670                          | 836.41             | 1396.86            | 1.785                          | 790.88             | 1411.88            |
| A_68_P26761435 | chr9:98856857-98856901                            | NM_012020:853             | Foxl2         | INSIDE                 | 1.069                                                        | 0.518                          | 1493.26            | 773.99             | 0.554                          | 1279.99            | 709.43             |
| A_68_P28748130 | chr12:113382569-113382613                         | NM_001097621:1828         | Kif26a        | PROMOTER               | 1.069                                                        | 2.404                          | 349.89             | 841.26             | 2.571                          | 297.08             | 763.77             |
| A_68_P23809993 | chr5:75971506-75971550                            | NM_021099:513             | Kit           | INSIDE                 | 1.069                                                        | 1.780                          | 420.38             | 748.18             | 1.903                          | 412.88             | 785.80             |
| A_68_P27262524 | chr10:75994246-75994290                           | NM_146006:103             | Lss           | PROMOTER               | 1.069                                                        | 1.923                          | 491.53             | 945.06             | 2.056                          | 441.10             | 906.99             |
| A_68_P28178600 | chr11:119411075-119411119                         | NM_008730:1962            | Nptx1         | PROMOTER               | 1.069                                                        | 1.757                          | 638.48             | 1122.01            | 1.878                          | 636.03             | 1194.77            |
| A_68_P27280129 | chr10:79440293-79440337                           | NM_001003949:6761         | ORF61         | INSIDE                 | 1.069                                                        | 3.303                          | 2255.16            | 7447.80            | 3.530                          | 1815.09            | 6407.46            |
| A_68_P31846729 | chr18:77493099-77493143                           | NM_013666:68535           | St8sia5       | INSIDE                 | 1.069                                                        | 2.766                          | 1461.26            | 4042.37            | 2.958                          | 1155.86            | 3419.28            |
| A_68_P26023336 | chr8:87561629-87561686                            | NM_001122843:591          | Tnpo2         | INSIDE                 | 1.069                                                        | 3.364                          | 268.81             | 904.32             | 3.596                          | 224.13             | 805.87             |
| A_68_P27234635 | chr10:70747809-70747853                           | NM_145420:180             | Ube2d1        | INSIDE                 | 1.069                                                        | 0.596                          | 1429.21            | 852.29             | 0.637                          | 1296.95            | 826.80             |
| A_68_P22417418 | chr3:109143649-109143693                          | NM_020505:70              | Vav3          | INSIDE                 | 1.069                                                        | 2.461                          | 389.83             | 959.42             | 2.631                          | 408.05             | 1073.51            |
| A_68_P23416419 | chr4:151460529-151460574                          | ENSMUST00000118648:415    |               | PROMOTER               | 1.069                                                        | 3.478                          | 984.81             | 3424.77            | 3.718                          | 797.52             | 2965.00            |
| A_68_P24686643 | chr6:99471350-99471394                            | ENSMUST00000155466:145419 |               | INSIDE                 | 1.069                                                        | 0.613                          | 2466.91            | 1512.10            | 0.655                          | 2035.70            | 1333.82            |
| A_68_P24006302 | chr5:115263981-115264025                          | NR_027817:17              | 1500011B03Rik | PROMOTER               | 1.068                                                        | 1.838                          | 1942.54            | 3571.14            | 1.964                          | 1463.30            | 2873.76            |
| A_68_P27812108 | chr11:54600567-54600611                           | NM_178626:617             | Cdc42se2      | INSIDE                 | 1.068                                                        | 0.594                          | 1334.22            | 792.35             | 0.634                          | 1091.79            | 692.69             |
| A_68_P24138647 | chr5:140447479-140447523                          | NM_175522:63604           | Elfn1         | INSIDE                 | 1.068                                                        | 2.193                          | 901.68             | 1977.41            | 2.343                          | 824.47             | 1931.59            |
| A_68_P30361918 | chr15:78549192-78549236                           | NM_183141:671             | Elfn2         | PROMOTER               | 1.068                                                        | 1.752                          | 2668.57            | 4674.10            | 1.871                          | 1948.84            | 3646.39            |
| A_68_P29287630 | chr13:104711739-104711783                         | NM_001005868:1166         | Erbp2ip       | PROMOTER               | 1.068                                                        | 5.682                          | 3000.78            | 17049.53           | 6.068                          | 2284.84            | 13864.31           |
| A_68_P23969235 | chr5:108298266-108298310                          | NM_007964:5838            | Evi5          | INSIDE                 | 1.068                                                        | 1.708                          | 1535.23            | 2622.70            | 1.824                          | 1358.86            | 2478.50            |
| A_68_P24620355 | chr6:88148400-88148444                            | NM_008090:235             | Gata2         | PROMOTER               | 1.068                                                        | 2.105                          | 1239.12            | 2608.22            | 2.248                          | 1173.52            | 2637.73            |
| A_68_P29097469 | chr13:64263530-64263574                           | NM_019986:379             | Habp4         | INSIDE                 | 1.068                                                        | 2.541                          | 414.14             | 1052.23            | 2.714                          | 445.10             | 1207.80            |
| A_68_P27812443 | chr11:54679796-54679846                           | NM_008248:119             | Hint1         | DIVERGENT_PROMOTER     | 1.068                                                        | 2.105                          | 261.60             | 550.65             | 2.249                          | 216.90             | 487.70             |
| A_68_P28043747 | chr11:96181632-96181676                           | NM_010459:2074            | Hoxb4         | INSIDE                 | 1.068                                                        | 1.769                          | 556.46             | 984.65             | 1.890                          | 535.78             | 1012.81            |
| A_68_P21137728 | chr2:35946930-35946974                            | NM_001083126:12628        | Lhx6          | INSIDE                 | 1.068                                                        | 1.733                          | 654.95             | 1135.16            | 1.852                          | 542.36             | 1004.23            |

| ProbeName      | Target position of probe on CpG island microarray | TargetID               | GeneSymbol    | CpG island Description | Ratio of relative methylation (TiO <sub>2</sub> -NP/Vehicle) | Sham group                     |                    |                    | TiO <sub>2</sub> -H group      |                    |                    |
|----------------|---------------------------------------------------|------------------------|---------------|------------------------|--------------------------------------------------------------|--------------------------------|--------------------|--------------------|--------------------------------|--------------------|--------------------|
|                |                                                   |                        |               |                        |                                                              | Relative methylation (Cy5/Cy3) | Cy3 signal (Input) | Cy5 signal (MeDIP) | Relative methylation (Cy5/Cy3) | Cy3 signal (Input) | Cy5 signal (MeDIP) |
| A_68_P23189553 | chr4:106926047-106926091                          | NM_029985:70           | Lrrc42        | INSIDE                 | 1.068                                                        | 1.518                          | 1928.94            | 2927.35            | 1.621                          | 1541.12            | 2497.59            |
| A_68_P31503253 | chr18:13020852-13020896                           | NM_207530:79355        | Osbpl1a       | INSIDE                 | 1.068                                                        | 2.496                          | 918.50             | 2292.39            | 2.665                          | 824.15             | 2196.29            |
| A_68_P21818280 | chr2:164332796-164332840                          | NM_133779:9794         | Pigt          | INSIDE                 | 1.068                                                        | 3.026                          | 1989.20            | 6018.73            | 3.232                          | 1197.74            | 3870.93            |
| A_68_P29681987 | chr14:67530058-67530102                           | NM_175498:36           | Pnma2         | INSIDE                 | 1.068                                                        | 0.635                          | 2489.00            | 1581.34            | 0.679                          | 2020.23            | 1370.76            |
| A_68_P25574426 | chr7:146038756-146038800                          | NM_026391:710          | Ppp2r2d       | INSIDE                 | 1.068                                                        | 2.181                          | 1217.08            | 2654.37            | 2.328                          | 966.88             | 2251.22            |
| A_68_P27807840 | chr11:53841165-53841209                           | NM_019687:406          | Slc22a4       | INSIDE                 | 1.068                                                        | 1.794                          | 1193.11            | 2140.03            | 1.916                          | 1017.07            | 1948.55            |
| A_68_P24983341 | chr7:17396988-17397032                            | NM_001039878:4227      | Strn4         | PROMOTER               | 1.068                                                        | 1.901                          | 2335.08            | 4438.41            | 2.029                          | 1975.72            | 4009.50            |
| A_68_P22383505 | chr3:102740035-102740079                          | NM_011516:33           | Sycp1         | PROMOTER               | 1.068                                                        | 1.583                          | 1047.06            | 1657.13            | 1.690                          | 899.22             | 1519.52            |
| A_68_P30574322 | chr16:17530755-17530799                           | NM_026909:369          | Thap7         | INSIDE                 | 1.068                                                        | 0.578                          | 2458.96            | 1420.16            | 0.617                          | 1782.36            | 1099.53            |
| A_68_P30991291 | chr16:96366989-96367033                           | NM_207301:-15          | Wrb           | PROMOTER               | 1.068                                                        | 1.414                          | 1096.66            | 1551.14            | 1.511                          | 874.97             | 1322.03            |
| A_68_P31342569 | chr17:73186874-73186918                           | NM_027166:853          | Ypel5         | INSIDE                 | 1.068                                                        | 1.492                          | 1088.88            | 1624.08            | 1.592                          | 943.62             | 1502.60            |
| A_68_P28950039 | chr13:36670467-36670511                           | AK135154:190947        |               | INSIDE                 | 1.068                                                        | 1.815                          | 599.71             | 1088.65            | 1.939                          | 579.69             | 1124.26            |
| A_68_P24619475 | chr6:87994860-87994904                            | ENSMUST00000113598:129 |               | INSIDE                 | 1.068                                                        | 1.506                          | 781.69             | 1177.05            | 1.608                          | 776.84             | 1249.39            |
| A_68_P28182344 | chr11:119959816-119959860                         | NM_183137:207          | 2410002101Rik | INSIDE                 | 1.067                                                        | 0.635                          | 2000.66            | 1269.49            | 0.677                          | 1506.96            | 1020.30            |
| A_68_P20354314 | chr1:75472567-75472611                            | NM_001001565:3458      | Chpf          | INSIDE                 | 1.067                                                        | 2.115                          | 855.37             | 1809.19            | 2.256                          | 586.08             | 1322.21            |
| A_68_P32567803 | chrX:99446637-99446681                            | NM_007709:450          | Cited1        | INSIDE                 | 1.067                                                        | 1.578                          | 1156.58            | 1824.62            | 1.683                          | 574.61             | 966.80             |
| A_68_P27897959 | chr11:69734325-69734369                           | NM_001166590:-214      | Eif5a         | PROMOTER               | 1.067                                                        | 0.532                          | 1355.27            | 721.46             | 0.568                          | 1116.84            | 634.31             |
| A_68_P21202298 | chr2:49360701-49360745                            | NM_172663:-283         | Epc2          | PROMOTER               | 1.067                                                        | 2.469                          | 688.54             | 1699.97            | 2.635                          | 602.74             | 1588.28            |
| A_68_P27594240 | chr11:11925551-11925597                           | NM_001177629:2400      | Grb10         | INSIDE                 | 1.067                                                        | 1.888                          | 872.01             | 1645.98            | 2.014                          | 699.64             | 1409.01            |
| A_68_P24798117 | chr6:120314589-120314634                          | NM_145997:495          | Kdm5a         | INSIDE                 | 1.067                                                        | 2.106                          | 450.76             | 949.53             | 2.248                          | 385.06             | 865.43             |
| A_68_P23658795 | chr5:46248998-46249042                            | NM_178142:-241         | Lcorl         | PROMOTER               | 1.067                                                        | 1.616                          | 1180.70            | 1908.36            | 1.724                          | 993.44             | 1712.92            |
| A_68_P26980659 | chr10:19076945-19076989                           | NM_053008:622          | Olig3         | INSIDE                 | 1.067                                                        | 1.491                          | 3743.93            | 5581.89            | 1.591                          | 2784.14            | 4430.55            |
| A_68_P26815241 | chr9:108420024-108420068                          | NM_001114119:629       | Qrich1        | INSIDE                 | 1.067                                                        | 1.618                          | 489.89             | 792.64             | 1.727                          | 464.16             | 801.48             |
| A_68_P32599600 | chrX:108576921-108576965                          | NM_025949:74612        | Rps6ka6       | INSIDE                 | 1.067                                                        | 2.037                          | 1127.39            | 2295.95            | 2.172                          | 737.79             | 1602.60            |
| A_68_P23338973 | chr4:136833633-136833677                          | NM_009523:105          | Wnt4          | INSIDE                 | 1.067                                                        | 2.461                          | 590.60             | 1453.17            | 2.626                          | 506.47             | 1330.03            |
| A_68_P26023270 | chr8:87551092-87551137                            | NM_026760:383          | 2310036O22Rik | INSIDE                 | 1.066                                                        | 1.773                          | 1876.67            | 3326.65            | 1.890                          | 1547.29            | 2924.30            |
| A_68_P28167621 | chr11:117722126-117722170                         | NM_001085535:83        | Cldn27        | INSIDE                 | 1.066                                                        | 2.088                          | 290.76             | 607.19             | 2.226                          | 278.10             | 619.04             |
| A_68_P24906446 | chr6:142705458-142705502                          | NM_009908:275          | Cmas          | INSIDE                 | 1.066                                                        | 0.522                          | 1282.60            | 669.67             | 0.557                          | 1036.94            | 577.15             |
| A_68_P27263162 | chr10:76086244-76086288                           | NM_146007:-117         | Col6a2        | PROMOTER               | 1.066                                                        | 1.768                          | 1103.03            | 1950.02            | 1.884                          | 880.30             | 1658.62            |
| A_68_P27272484 | chr10:77632233-77632277                           | NM_138601:259          | D10Jhu81e     | INSIDE                 | 1.066                                                        | 0.591                          | 1279.44            | 756.61             | 0.630                          | 1051.98            | 662.99             |
| A_68_P29446598 | chr14:21208189-21208233                           | NM_134081:-78          | Dnajc9        | PROMOTER               | 1.066                                                        | 2.422                          | 1119.97            | 2712.50            | 2.582                          | 978.53             | 2526.78            |
| A_68_P25827947 | chr8:46108650-46108696                            | NM_001081286:73111     | Fat1          | INSIDE                 | 1.066                                                        | 2.500                          | 368.52             | 921.47             | 2.665                          | 345.10             | 919.73             |
| A_68_P32139834 | chr19:45734660-45734704                           | NM_013907:1            | Fbxw4         | INSIDE                 | 1.066                                                        | 1.489                          | 2500.73            | 3723.63            | 1.587                          | 1882.33            | 2987.01            |
| A_68_P20510204 | chr1:108656008-108656052                          | NM_027534:289          | Kdsr          | INSIDE                 | 1.066                                                        | 1.579                          | 1322.12            | 2087.69            | 1.683                          | 1187.20            | 1997.81            |
| A_68_P25016729 | chr7:28116317-28116361                            | NM_001113549:2329      | Ltbp4         | INSIDE                 | 1.066                                                        | 1.541                          | 854.92             | 1317.85            | 1.642                          | 708.89             | 1164.33            |
| A_68_P25953978 | chr8:73300295-73300339                            | NM_008841:295          | Pik3r2        | INSIDE                 | 1.066                                                        | 1.444                          | 1291.32            | 1864.47            | 1.539                          | 1033.67            | 1590.69            |
| A_68_P24117614 | chr5:136210246-136210290                          | NM_008898:45185        | Por           | INSIDE                 | 1.066                                                        | 2.178                          | 1217.63            | 2651.88            | 2.321                          | 1026.64            | 2382.86            |
| A_68_P21091624 | chr2:28389115-28389159                            | NM_001145835:153       | Ralgds        | INSIDE                 | 1.066                                                        | 1.744                          | 712.69             | 1243.09            | 1.859                          | 642.17             | 1193.73            |
| A_68_P25094160 | chr7:52888072-52888116                            | NM_028544:5188         | Rasip1        | INSIDE                 | 1.066                                                        | 2.168                          | 737.80             | 1599.44            | 2.311                          | 691.74             | 1598.91            |
| A_68_P31256957 | chr17:56706054-56706098                           | NM_001029979:17930     | Safb2         | INSIDE                 | 1.066                                                        | 2.415                          | 366.58             | 885.23             | 2.574                          | 357.62             | 920.35             |
| A_68_P27167593 | chr10:58684415-58684459                           | NM_001024910:159       | Septin10      | INSIDE                 | 1.066                                                        | 2.713                          | 435.09             | 1180.55            | 2.893                          | 430.32             | 1244.77            |
| A_68_P23590297 | chr5:33995249-33995293                            | NM_009193:-315         | Slbp          | PROMOTER               | 1.066                                                        | 0.513                          | 1039.37            | 533.38             | 0.547                          | 929.15             | 508.24             |
| A_68_P23353414 | chr4:139225201-139225245                          | NM_031873:15770        | Tas1r2        | INSIDE                 | 1.066                                                        | 1.735                          | 630.17             | 1093.56            | 1.851                          | 531.26             | 983.19             |
| A_68_P23998980 | chr5:114037914-114037958                          | NM_177292:118470       | Wscd2         | INSIDE                 | 1.066                                                        | 2.233                          | 1300.40            | 2903.15            | 2.380                          | 998.19             | 2375.29            |
| A_68_P31669245 | chr18:44988148-44988192                           | NM_001163013:-148      | Ythdc2        | PROMOTER               | 1.066                                                        | 1.960                          | 568.50             | 1114.09            | 2.090                          | 490.84             | 1025.65            |
| A_68_P22630568 | chr3:148652007-148652051                          | ENSMUST00000098518:252 |               | INSIDE                 | 1.066                                                        | 1.830                          | 765.09             | 1400.31            | 1.951                          | 741.71             | 1447.07            |
| A_68_P23978457 | chr5:110660379-110660423                          | NM_027922:341          | Ankle2        | INSIDE                 | 1.065                                                        | 1.420                          | 1244.39            | 1767.16            | 1.512                          | 1051.58            | 1589.95            |
| A_68_P31926489 | chr19:5039460-5039504                             | NM_175383:657          | B3gnt1        | INSIDE                 | 1.065                                                        | 1.696                          | 2170.05            | 3679.70            | 1.716                          | 716.78             | 3101.32            |
| A_68_P25093322 | chr7:52721892-52721936                            | NM_007527:354          | Bax           | INSIDE                 | 1.065                                                        | 1.464                          | 1172.94            | 1717.28            | 1.559                          | 999.87             | 1558.81            |
| A_68_P20137272 | chr1:34234902-34234946                            | NM_133833:166255       | Dst           | INSIDE                 | 1.065                                                        | 3.338                          | 574.40             | 1917.21            | 3.555                          | 529.93             | 1884.15            |
| A_68_P29712956 | chr14:72931825-72931869                           | NM_207636:177964       | Fndc3a        | DOWNSTREAM             | 1.065                                                        | 1.912                          | 1643.13            | 3140.92            | 2.036                          | 1410.63            | 2871.85            |

| ProbeName      | Target position of probe on CpG island microarray | TargetID            | GeneSymbol    | CpG island Description | Ratio of relative methylation (TiO <sub>2</sub> -NP/Vehicle) | Sham group                                             |                               |                               | TiO <sub>2</sub> -H group                              |                               |                               |
|----------------|---------------------------------------------------|---------------------|---------------|------------------------|--------------------------------------------------------------|--------------------------------------------------------|-------------------------------|-------------------------------|--------------------------------------------------------|-------------------------------|-------------------------------|
|                |                                                   |                     |               |                        |                                                              | Relative methylation (C <sub>5</sub> /C <sub>3</sub> ) | C <sub>3</sub> signal (Input) | C <sub>5</sub> signal (MeDIP) | Relative methylation (C <sub>5</sub> /C <sub>3</sub> ) | C <sub>3</sub> signal (Input) | C <sub>5</sub> signal (MeDIP) |
| A_68_P23250423 | chr4:119955345-119955389                          | NM_194060:4500      | Foxo6         | INSIDE                 | 1.065                                                        | 1.435                                                  | 2217.29                       | 3182.43                       | 1.529                                                  | 1976.76                       | 3021.94                       |
| A_68_P28558329 | chr12:78339501-78339545                           | NM_016893:485       | Fut8          | PROMOTER               | 1.065                                                        | 1.640                                                  | 679.96                        | 1115.02                       | 1.746                                                  | 554.76                        | 968.50                        |
| A_68_P28577467 | chr12:81858507-81858551                           | NM_001008423:3174   | Gm1568        | INSIDE                 | 1.065                                                        | 2.221                                                  | 793.23                        | 1761.72                       | 2.365                                                  | 672.98                        | 1591.65                       |
| A_68_P26891191 | chr9:122656494-122656538                          | NM_001199736:53     | Gm9524        | INSIDE                 | 1.065                                                        | 2.823                                                  | 1069.85                       | 3019.78                       | 3.007                                                  | 871.87                        | 2621.91                       |
| A_68_P21874515 | chr2:174125570-174125614                          | NM_201617:2233      | Gnas          | INSIDE                 | 1.065                                                        | 1.514                                                  | 633.41                        | 959.05                        | 1.613                                                  | 589.31                        | 950.39                        |
| A_68_P25011764 | chr7:26539484-26539528                            | NM_178089:214       | Hnrmpul1      | INSIDE                 | 1.065                                                        | 0.533                                                  | 1101.26                       | 587.23                        | 0.568                                                  | 928.86                        | 527.38                        |
| A_68_P26026700 | chr8:88364563-88364607                            | NM_028007:264       | Irfg1         | INSIDE                 | 1.065                                                        | 1.915                                                  | 835.48                        | 1599.64                       | 2.038                                                  | 745.02                        | 1518.50                       |
| A_68_P29616394 | chr14:55732300-55732344                           | NM_177049:3450      | Jph4          | INSIDE                 | 1.065                                                        | 2.290                                                  | 349.86                        | 801.22                        | 2.438                                                  | 357.50                        | 871.64                        |
| A_68_P24816534 | chr6:124662607-124662651                          | NM_007531:322       | Phb2          | INSIDE                 | 1.065                                                        | 0.507                                                  | 2195.04                       | 1112.58                       | 0.540                                                  | 1679.32                       | 906.21                        |
| A_68_P27034633 | chr10:29081479-29081523                           | NM_001110196:748    | Rnf146        | INSIDE                 | 1.065                                                        | 0.588                                                  | 1387.27                       | 816.22                        | 0.627                                                  | 1299.81                       | 814.71                        |
| A_68_P29675225 | chr14:66349795-66349839                           | NM_001168318:64577  | Scara5        | INSIDE                 | 1.065                                                        | 1.946                                                  | 850.29                        | 1654.80                       | 2.073                                                  | 748.60                        | 1551.83                       |
| A_68_P22523675 | chr3:129763103-129763147                          | NM_207209:701       | Sec24b        | INSIDE                 | 1.065                                                        | 2.126                                                  | 1415.44                       | 3008.78                       | 2.264                                                  | 1355.15                       | 3067.49                       |
| A_68_P28730170 | chr12:110065141-110065185                         | NM_181328:8924      | Stc25a29      | INSIDE                 | 1.065                                                        | 2.184                                                  | 557.17                        | 1216.63                       | 2.324                                                  | 500.81                        | 1164.10                       |
| A_68_P31099197 | chr17:24856900-24856944                           | NR_027900:-12       | Snhg9         | DIVERGENT_PROMOTER     | 1.065                                                        | 0.622                                                  | 2445.04                       | 1519.80                       | 0.662                                                  | 1921.63                       | 1272.48                       |
| A_68_P21813370 | chr2:163428210-163428254                          | NM_029512:183       | Ttpal         | INSIDE                 | 1.065                                                        | 1.433                                                  | 2253.30                       | 3229.02                       | 1.525                                                  | 1857.85                       | 2834.10                       |
| A_68_P27446662 | chr10:110447016-110447060                         | NM_172554:84        | Zdhhc17       | INSIDE                 | 1.065                                                        | 1.596                                                  | 821.53                        | 1310.95                       | 1.699                                                  | 822.01                        | 1396.54                       |
| A_68_P26736547 | chr9:94438241-94438285                            | NM_001033145:238    | 1190002N15Rik | INSIDE                 | 1.064                                                        | 1.403                                                  | 1025.81                       | 1438.88                       | 1.492                                                  | 993.80                        | 1482.93                       |
| A_68_P21084956 | chr2:27331496-27331540                            | NM_001113573:-325   | Brd3          | PROMOTER               | 1.064                                                        | 1.825                                                  | 398.45                        | 727.09                        | 1.942                                                  | 348.84                        | 677.42                        |
| A_68_P25520724 | chr7:137409910-137409954                          | NM_010207:390       | Fgfr2         | INSIDE                 | 1.064                                                        | 2.159                                                  | 742.01                        | 1601.66                       | 2.296                                                  | 666.96                        | 1531.48                       |
| A_68_P25174403 | chr7:71083373-71083417                            | NM_021366:407       | Klfl3         | INSIDE                 | 1.064                                                        | 0.462                                                  | 1384.41                       | 639.74                        | 0.492                                                  | 1243.27                       | 611.15                        |
| A_68_P27560004 | chr11:4748803-4748847                             | NM_010898:706       | Nf2           | INSIDE                 | 1.064                                                        | 0.586                                                  | 1353.85                       | 793.15                        | 0.623                                                  | 1150.75                       | 717.31                        |
| A_68_P28457435 | chr12:57634322-57634366                           | NM_001146198:1749   | Nkx2-1        | INSIDE                 | 1.064                                                        | 1.621                                                  | 531.31                        | 861.22                        | 1.724                                                  | 569.79                        | 982.34                        |
| A_68_P27287757 | chr10:80616441-80616485                           | NM_021501:14003     | Pias4         | DOWNSTREAM             | 1.064                                                        | 3.121                                                  | 6991.11                       | 21817.94                      | 3.320                                                  | 4931.95                       | 16373.16                      |
| A_68_P21568534 | chr2:119063096-119063140                          | NM_016907:23        | Spint1        | INSIDE                 | 1.064                                                        | 2.479                                                  | 675.39                        | 1674.53                       | 2.639                                                  | 588.94                        | 1554.16                       |
| A_68_P26626134 | chr9:71959499-71959543                            | NM_011544:106       | Tcf12         | INSIDE                 | 1.064                                                        | 3.050                                                  | 214.12                        | 652.99                        | 3.245                                                  | 195.47                        | 634.31                        |
| A_68_P25393403 | chr7:112781845-112781889                          | NM_018880:147       | Trim3         | INSIDE                 | 1.064                                                        | 1.435                                                  | 13126.83                      | 18842.37                      | 1.528                                                  | 9134.82                       | 13955.10                      |
| A_68_P30094472 | chr15:27703695-27703739                           | NM_001081302:251887 | Trio          | INSIDE                 | 1.064                                                        | 2.354                                                  | 1311.68                       | 3088.05                       | 2.505                                                  | 1110.35                       | 2781.30                       |
| A_68_P20737715 | chr1:157264567-157264611                          | NM_011273:-14       | Xpr1          | PROMOTER               | 1.064                                                        | 1.456                                                  | 1651.21                       | 2404.07                       | 1.549                                                  | 1160.31                       | 2107.17                       |
| A_68_P26885416 | chr9:121672100-121672144                          | NM_001166644:2972   | Zfp651        | INSIDE                 | 1.064                                                        | 2.065                                                  | 496.15                        | 1024.62                       | 2.197                                                  | 480.38                        | 1055.22                       |
| A_68_P27977895 | chr11:84326684-84326728                           | NM_019816:297       | Aatf          | INSIDE                 | 1.063                                                        | 0.543                                                  | 1178.74                       | 640.54                        | 0.578                                                  | 1054.55                       | 609.34                        |
| A_68_P20633262 | chr1:136311950-136311994                          | NM_028320:-71       | Adipor1       | PROMOTER               | 1.063                                                        | 0.393                                                  | 1840.01                       | 723.62                        | 0.418                                                  | 1581.37                       | 660.79                        |
| A_68_P28153228 | chr11:115255096-115255140                         | NM_001080929:11889  | Cdr21         | INSIDE                 | 1.063                                                        | 1.533                                                  | 647.86                        | 992.88                        | 1.629                                                  | 574.04                        | 935.20                        |
| A_68_P21633705 | chr2:131005466-131005510                          | NM_007682:260       | Cenpb         | INSIDE                 | 1.063                                                        | 2.135                                                  | 1286.26                       | 2746.41                       | 2.270                                                  | 1141.88                       | 2591.50                       |
| A_68_P27303129 | chr10:83996944-83996988                           | NM_175451:-333      | Ckap4         | PROMOTER               | 1.063                                                        | 1.501                                                  | 1001.56                       | 1503.09                       | 1.595                                                  | 874.68                        | 1395.05                       |
| A_68_P32364770 | chrX:45807712-45807756                            | NM_019680:8575      | Elf4          | INSIDE                 | 1.063                                                        | 1.586                                                  | 2361.48                       | 3744.24                       | 1.685                                                  | 1202.67                       | 2027.07                       |
| A_68_P32743829 | chrX:147451959-147452003                          | NM_198110:-115      | Gnl3l         | PROMOTER               | 1.063                                                        | 1.734                                                  | 1767.66                       | 3065.15                       | 1.844                                                  | 921.10                        | 1698.05                       |
| A_68_P32152399 | chr19:47940223-47940267                           | NM_026619:-39       | Gsto2         | PROMOTER               | 1.063                                                        | 2.550                                                  | 815.09                        | 2078.66                       | 2.711                                                  | 740.63                        | 2007.90                       |
| A_68_P24623143 | chr6:88577556-88577600                            | NM_001142724:-139   | Kbtbd12       | PROMOTER               | 1.063                                                        | 1.804                                                  | 2698.05                       | 4866.07                       | 1.917                                                  | 2325.06                       | 4456.69                       |
| A_68_P22406473 | chr3:107262834-107262878                          | NM_145922:-1040     | Kcnc4         | PROMOTER               | 1.063                                                        | 3.764                                                  | 355.56                        | 1338.39                       | 4.003                                                  | 321.77                        | 1288.04                       |
| A_68_P20939667 | chr1:193542758-193542803                          | NM_001134829:507    | Lpgat1        | INSIDE                 | 1.063                                                        | 2.502                                                  | 803.87                        | 2011.04                       | 2.660                                                  | 639.01                        | 1700.02                       |
| A_68_P31442545 | chr17:91487617-91487661                           | NM_020252:4504      | Nrxn1         | INSIDE                 | 1.063                                                        | 2.714                                                  | 1118.21                       | 3034.47                       | 2.883                                                  | 968.72                        | 2793.29                       |
| A_68_P27648122 | chr11:23794713-23794757                           | NM_172555:536       | Papolg        | INSIDE                 | 1.063                                                        | 1.539                                                  | 3514.20                       | 5409.15                       | 1.636                                                  | 2725.59                       | 4458.97                       |
| A_68_P22774297 | chr4:21605606-21605652                            | NM_001080771:7482   | Prdm13        | INSIDE                 | 1.063                                                        | 0.526                                                  | 991.35                        | 521.58                        | 0.559                                                  | 823.33                        | 460.63                        |
| A_68_P25100826 | chr7:53965778-53965822                            | NM_030233:221       | Saal1         | INSIDE                 | 1.063                                                        | 1.377                                                  | 3165.68                       | 4358.13                       | 1.463                                                  | 2524.93                       | 3693.33                       |
| A_68_P20457300 | chr1:95651043-95651087                            | NM_025920:351       | Thap4         | INSIDE                 | 1.063                                                        | 1.678                                                  | 1225.61                       | 2056.95                       | 1.784                                                  | 1090.13                       | 1944.65                       |
| A_68_P22360091 | chr3:98231564-98231608                            | NM_172863:45183     | Zfp697        | INSIDE                 | 1.063                                                        | 2.487                                                  | 9225.38                       | 22946.94                      | 2.643                                                  | 6303.91                       | 16664.00                      |
| A_68_P27268023 | chr10:76880611-76880655                           | NM_001024837:386    | Adarb1        | INSIDE                 | 1.062                                                        | 2.130                                                  | 274.09                        | 583.67                        | 2.261                                                  | 257.87                        | 583.08                        |
| A_68_P28776185 | chr12:119082606-119082650                         | NM_146040:295       | Cdca7l        | INSIDE                 | 1.062                                                        | 2.321                                                  | 618.93                        | 1436.62                       | 2.465                                                  | 588.78                        | 1451.09                       |
| A_68_P30431386 | chr15:90509992-90510036                           | NM_025815:-195      | Cpne8         | PROMOTER               | 1.062                                                        | 1.646                                                  | 1667.61                       | 2744.88                       | 1.747                                                  | 1316.08                       | 2299.69                       |
| A_68_P23362416 | chr4:140703968-140704012                          | NM_172518:154       | Fbxo42        | INSIDE                 | 1.062                                                        | 2.346                                                  | 1727.15                       | 4051.36                       | 2.492                                                  | 1524.92                       | 3800.28                       |
| A_68_P21811851 | chr2:163164903-163164947                          | NM_021566:58785     | Jph2          | INSIDE                 | 1.062                                                        | 4.607                                                  | 12198.30                      | 56200.61                      | 4.892                                                  | 8024.74                       | 39258.66                      |

| ProbeName      | Target position of probe on CpG island microarray | TargetID                | GeneSymbol    | CpG island Description | Ratio of relative methylation (TiO <sub>2</sub> -NP/Vehicle) | Sham group                     |                    |                    | TiO <sub>2</sub> -H group      |                    |                    |
|----------------|---------------------------------------------------|-------------------------|---------------|------------------------|--------------------------------------------------------------|--------------------------------|--------------------|--------------------|--------------------------------|--------------------|--------------------|
|                |                                                   |                         |               |                        |                                                              | Relative methylation (Cy5/Cy3) | Cy3 signal (Input) | Cy5 signal (MeDIP) | Relative methylation (Cy5/Cy3) | Cy3 signal (Input) | Cy5 signal (MeDIP) |
| A_68_P31125154 | chr17:29089463-29089507                           | NM_025888:-676          | Kctd20        | PROMOTER               | 1.062                                                        | 2.042                          | 1483.60            | 3029.40            | 2.169                          | 1363.23            | 2956.52            |
| A_68_P22006133 | chr3:26230419-26230463                            | NM_138666:391           | Nlgn1         | INSIDE                 | 1.062                                                        | 1.470                          | 2019.90            | 2969.89            | 1.561                          | 1737.47            | 2712.86            |
| A_68_P21628850 | chr2:130099716-130099773                          | NM_024193:-403          | Nop56         | PROMOTER               | 1.062                                                        | 2.046                          | 1007.80            | 2062.32            | 2.174                          | 799.96             | 1739.26            |
| A_68_P30397307 | chr15:84686477-84686521                           | NM_001081166:61         | Phf21b        | INSIDE                 | 1.062                                                        | 2.626                          | 366.48             | 962.46             | 2.790                          | 366.20             | 1021.60            |
| A_68_P31934550 | chr19:6413237-6413281                             | NM_011242:12676         | Rasgrp2       | INSIDE                 | 1.062                                                        | 2.376                          | 4064.02            | 9656.89            | 2.523                          | 3087.76            | 7789.77            |
| A_68_P21867216 | chr2:172847313-172847357                          | NM_019547:-68           | Rbm38         | PROMOTER               | 1.062                                                        | 1.909                          | 1387.85            | 2650.05            | 2.027                          | 1160.68            | 2352.58            |
| A_68_P27286998 | chr10:80494022-80494066                           | NM_134135:2613          | Stc39a3       | INSIDE                 | 1.062                                                        | 2.534                          | 1329.83            | 3370.15            | 2.691                          | 1130.74            | 3042.74            |
| A_68_P26750365 | chr9:96896276-96896320                            | NM_145134:22476         | Spsb4         | INSIDE                 | 1.062                                                        | 2.697                          | 275.25             | 742.40             | 2.865                          | 327.43             | 938.18             |
| A_68_P20736178 | chr1:157006310-157006354                          | NM_021433:500           | Stx6          | INSIDE                 | 1.062                                                        | 1.602                          | 1110.11            | 1778.35            | 1.702                          | 952.30             | 1620.80            |
| A_68_P30015972 | chr15:111313703-11313747                          | NM_033074:15689         | Tars          | INSIDE                 | 1.062                                                        | 1.777                          | 1080.26            | 1919.16            | 1.887                          | 851.29             | 1606.72            |
| A_68_P21658149 | chr2:135485033-135485077                          | ENSMUST00000139480:-235 |               | PROMOTER               | 1.062                                                        | 3.161                          | 598.57             | 1891.91            | 3.358                          | 559.15             | 1877.62            |
| A_68_P28939817 | chr13:34744234-34744278                           | NM_025831:294           | 1300014006Rik | INSIDE                 | 1.061                                                        | 2.666                          | 808.78             | 2156.33            | 2.829                          | 733.80             | 2075.72            |
| A_68_P24006039 | chr5:115224465-115224516                          | NR_027872:502           | 4930515G01Rik | INSIDE                 | 1.061                                                        | 2.045                          | 565.94             | 1157.19            | 2.170                          | 532.57             | 1155.79            |
| A_68_P20395057 | chr1:82835935-82835979                            | NM_010472:-101          | Agfg1         | PROMOTER               | 1.061                                                        | 1.362                          | 1745.30            | 2376.30            | 1.445                          | 1464.82            | 2116.42            |
| A_68_P28175391 | chr11:118895720-118895764                         | NM_007623:11400         | Cbx2          | DOWNSTREAM             | 1.061                                                        | 0.593                          | 1506.85            | 893.24             | 0.629                          | 1058.78            | 666.16             |
| A_68_P22412513 | chr3:108215712-108215756                          | NM_001004177:2678       | Celsr2        | INSIDE                 | 1.061                                                        | 2.553                          | 789.99             | 2016.61            | 2.709                          | 618.72             | 1676.15            |
| A_68_P25603237 | chr7:151015959-151016003                          | NM_007856:6909          | Dher7         | INSIDE                 | 1.061                                                        | 1.650                          | 1159.42            | 1912.59            | 1.750                          | 1010.83            | 1768.51            |
| A_68_P22858439 | chr4:40670130-40670174                            | NM_001164672:190        | Dnaj1         | INSIDE                 | 1.061                                                        | 1.820                          | 950.46             | 1729.82            | 1.931                          | 905.48             | 1748.68            |
| A_68_P29287625 | chr13:104710556-104710600                         | NM_001005868:16         | Erbp2ip       | INSIDE                 | 1.061                                                        | 1.864                          | 599.15             | 1116.96            | 1.978                          | 499.04             | 986.94             |
| A_68_P21909701 | chr2:181022187-181022231                          | NM_198169:463           | Gmeb2         | INSIDE                 | 1.061                                                        | 1.359                          | 2571.75            | 3495.74            | 1.442                          | 1885.13            | 2718.02            |
| A_68_P30142979 | chr15:37162921-37162965                           | NM_026496:152           | Grhl2         | INSIDE                 | 1.061                                                        | 1.924                          | 2064.37            | 3972.78            | 2.043                          | 1671.31            | 3413.99            |
| A_68_P29469007 | chr14:24822857-24822901                           | NM_010610:549           | Kenma1        | INSIDE                 | 1.061                                                        | 1.588                          | 7468.40            | 11856.67           | 1.685                          | 5299.67            | 8928.22            |
| A_68_P25187996 | chr7:73532827-73532871                            | NM_146191:379           | Lrrk1         | INSIDE                 | 1.061                                                        | 2.385                          | 930.46             | 2218.78            | 2.531                          | 863.50             | 2185.34            |
| A_68_P27845570 | chr11:60745579-60745623                           | NM_008928:42            | Map2k3        | INSIDE                 | 1.061                                                        | 0.589                          | 1373.01            | 808.14             | 0.624                          | 1114.73            | 696.08             |
| A_68_P30083232 | chr15:25710801-25710845                           | NM_019472:158518        | Myo10         | INSIDE                 | 1.061                                                        | 3.772                          | 279.12             | 1052.73            | 4.000                          | 252.46             | 1009.88            |
| A_68_P20184670 | chr1:42754004-42754048                            | NM_008900:36            | Pou3f3        | INSIDE                 | 1.061                                                        | 1.445                          | 1123.59            | 1623.28            | 1.532                          | 1003.27            | 1537.18            |
| A_68_P26805183 | chr9:106691283-106691327                          | NM_030730:240           | Rad54l2       | INSIDE                 | 1.061                                                        | 1.653                          | 570.21             | 942.66             | 1.754                          | 543.20             | 952.57             |
| A_68_P24992476 | chr7:19872340-19872384                            | NM_001025364:-4085      | Rtn2          | PROMOTER               | 1.061                                                        | 1.809                          | 631.69             | 1142.92            | 1.920                          | 563.16             | 1081.39            |
| A_68_P20870656 | chr1:181448020-181448064                          | NM_027188:92            | Smyd3         | INSIDE                 | 1.061                                                        | 1.370                          | 3062.67            | 4196.61            | 1.454                          | 2340.54            | 3404.07            |
| A_68_P20005797 | chr1:4482373-4482417                              | NM_011441:4100          | Sox17         | INSIDE                 | 1.061                                                        | 1.589                          | 1431.99            | 2275.11            | 1.685                          | 1269.05            | 2138.80            |
| A_68_P31953435 | chr19:10956222-10956266                           | NM_134142:-11           | Tmem109       | PROMOTER               | 1.061                                                        | 1.493                          | 664.98             | 992.99             | 1.585                          | 558.09             | 884.31             |
| A_68_P32709177 | chr2:139116370-139116414                          | NM_001199360:124        | Tmem164       | INSIDE                 | 1.061                                                        | 2.766                          | 3568.80            | 9870.08            | 2.933                          | 1703.12            | 4996.04            |
| A_68_P25056444 | chr7:37481116-37481160                            | NM_172298:-1998         | Tshz3         | PROMOTER               | 1.061                                                        | 1.823                          | 774.46             | 1411.53            | 1.933                          | 782.37             | 1512.34            |
| A_68_P21779875 | chr2:157741034-157741081                          | NM_198627:669           | Vstm2l        | INSIDE                 | 1.061                                                        | 2.846                          | 1593.58            | 4535.74            | 3.020                          | 1121.35            | 3386.19            |
| A_68_P31479223 | chr18:7868850-7868894                             | NM_001146298:-322       | Wac           | PROMOTER               | 1.061                                                        | 1.841                          | 1009.63            | 1858.37            | 1.953                          | 961.15             | 1876.87            |
| A_68_P25272791 | chr7:88716304-88716348                            | NM_001004185:149        | Whamm         | INSIDE                 | 1.061                                                        | 2.277                          | 502.90             | 1145.19            | 2.416                          | 441.36             | 1066.21            |
| A_68_P22970352 | chr4:63077484-63077528                            | NM_001008797:16850      | Whrn          | INSIDE                 | 1.061                                                        | 3.007                          | 1577.22            | 4743.33            | 3.191                          | 1120.71            | 3576.58            |
| A_68_P28751779 | chr12:113917392-113917436                         | NM_001100460:364        | Zbtb42        | INSIDE                 | 1.061                                                        | 2.635                          | 1111.42            | 2928.60            | 2.795                          | 968.56             | 2707.36            |
| A_68_P29656177 | chr14:63174859-63174903                           | ENSMUST00000160745:269  |               | INSIDE                 | 1.061                                                        | 1.420                          | 3267.38            | 4640.35            | 1.507                          | 2526.30            | 3807.42            |
| A_68_P21833421 | chr2:166888085-166888129                          | NM_001081005:-327       | 1500012F01Rik | PROMOTER               | 1.060                                                        | 1.588                          | 1268.52            | 2014.59            | 1.683                          | 1043.61            | 1756.61            |
| A_68_P21528938 | chr2:112295037-112295081                          | NM_133749:-123          | 2900064A13Rik | PROMOTER               | 1.060                                                        | 1.852                          | 740.97             | 1372.23            | 1.963                          | 722.01             | 1417.44            |
| A_68_P30743457 | chr16:48994281-48994325                           | NM_172616:2             | C330027C09Rik | INSIDE                 | 1.060                                                        | 2.351                          | 491.36             | 1155.44            | 2.492                          | 454.13             | 1131.90            |
| A_68_P31208114 | chr17:46787782-46787826                           | NM_025611:518           | Cul7          | INSIDE                 | 1.060                                                        | 1.970                          | 4081.36            | 8039.80            | 2.089                          | 2929.86            | 6120.46            |
| A_68_P28525542 | chr12:72419588-72419632                           | NM_001190466:8740       | Dact1         | INSIDE                 | 1.060                                                        | 3.038                          | 767.91             | 2332.87            | 3.221                          | 664.44             | 2140.12            |
| A_68_P27924584 | chr11:74982007-74982051                           | NM_001098203:-374       | Hic1          | PROMOTER               | 1.060                                                        | 1.368                          | 1812.80            | 2479.49            | 1.451                          | 1430.02            | 2074.25            |
| A_68_P23333242 | chr4:135866928-135866972                          | NM_028871:60            | Hnrnp1        | INSIDE                 | 1.060                                                        | 1.841                          | 577.01             | 1062.14            | 1.952                          | 501.30             | 978.34             |
| A_68_P23949339 | chr5:104339900-104339944                          | NM_178741:326           | Kihl8         | INSIDE                 | 1.060                                                        | 1.633                          | 1033.11            | 1686.87            | 1.730                          | 907.33             | 1570.10            |
| A_68_P29725073 | chr14:75346827-75346871                           | NM_001033439:836        | Lrch1         | INSIDE                 | 1.060                                                        | 0.569                          | 1359.68            | 773.58             | 0.603                          | 1192.40            | 719.43             |
| A_68_P23334046 | chr4:136018440-136018484                          | NM_024452:-7213         | Luzp1         | PROMOTER               | 1.060                                                        | 2.968                          | 516.83             | 1533.93            | 3.145                          | 457.54             | 1439.03            |
| A_68_P28744816 | chr12:112812796-112812840                         | NM_021516:98            | Mark3         | INSIDE                 | 1.060                                                        | 1.445                          | 2876.14            | 4157.17            | 1.532                          | 2477.93            | 3796.47            |
| A_68_P27154487 | chr10:55835680-55835724                           | NM_001163833:8980       | Msl3l2        | INSIDE                 | 1.060                                                        | 0.517                          | 1013.81            | 524.34             | 0.548                          | 885.39             | 485.56             |

| ProbeName      | Target position of probe on CpG island microarray | TargetID               | GeneSymbol    | CpG island Description | Ratio of relative methylation (TiO <sub>2</sub> -NP/Vehicle) | Sham group                     |                    |                    | TiO <sub>2</sub> -H group      |                    |                    |
|----------------|---------------------------------------------------|------------------------|---------------|------------------------|--------------------------------------------------------------|--------------------------------|--------------------|--------------------|--------------------------------|--------------------|--------------------|
|                |                                                   |                        |               |                        |                                                              | Relative methylation (Cy5/Cy3) | Cy3 signal (Input) | Cy5 signal (MeDIP) | Relative methylation (Cy5/Cy3) | Cy3 signal (Input) | Cy5 signal (MeDIP) |
| A_68_P32395552 | chrX:53627636-53627680                            | NR_028086:-104         | Nerna00086    | PROMOTER               | 1.060                                                        | 1.889                          | 3488.88            | 6590.57            | 2.003                          | 1753.31            | 3512.07            |
| A_68_P23310229 | chr4:131669398-131669442                          | NM_013622:30981        | Oprd1         | INSIDE                 | 1.060                                                        | 1.686                          | 860.07             | 1450.16            | 1.787                          | 757.83             | 1354.48            |
| A_68_P24956667 | chr7:6683071-6683115                              | NM_008817:38           | Peg3          | INSIDE                 | 1.060                                                        | 1.978                          | 1601.52            | 3167.82            | 2.096                          | 1446.95            | 3032.79            |
| A_68_P31207976 | chr17:46766512-46766556                           | NM_175168:-81          | Ptk7          | PROMOTER               | 1.060                                                        | 3.291                          | 776.86             | 2556.42            | 3.487                          | 550.58             | 1920.14            |
| A_68_P27478506 | chr10:116387438-116387482                         | NM_001003950:-24       | Rab3ip        | DIVERGENT_PROMOTER     | 1.060                                                        | 2.100                          | 451.75             | 948.55             | 2.225                          | 407.29             | 906.15             |
| A_68_P21875633 | chr2:174298255-174298299                          | NM_025531:166          | Slmo2         | INSIDE                 | 1.060                                                        | 1.722                          | 905.44             | 1558.74            | 1.825                          | 723.15             | 1319.59            |
| A_68_P25507646 | chr7:134985207-134985251                          | NM_009294:-93          | Stx4a         | PROMOTER               | 1.060                                                        | 2.442                          | 814.24             | 1988.54            | 2.588                          | 724.96             | 1876.17            |
| A_68_P23429326 | chr4:153514732-153514776                          | NM_011642:-437         | Trp73         | DIVERGENT_PROMOTER     | 1.060                                                        | 0.492                          | 1158.68            | 570.25             | 0.522                          | 761.71             | 397.32             |
| A_68_P30476460 | chr15:98620564-98620608                           | NM_021279:299          | Wnt1          | INSIDE                 | 1.060                                                        | 1.439                          | 1148.78            | 1652.99            | 1.525                          | 955.89             | 1457.45            |
| A_68_P25008265 | chr7:25866336-25866380                            | NM_175477:4094         | Zfp574        | INSIDE                 | 1.060                                                        | 3.211                          | 2802.17            | 8997.55            | 3.403                          | 2116.24            | 7200.92            |
| A_68_P30593947 | chr16:21694402-21694446                           | NM_001001881:314       | 2510009E07Rik | INSIDE                 | 1.059                                                        | 1.999                          | 885.99             | 1770.92            | 2.117                          | 742.17             | 1571.17            |
| A_68_P31053603 | chr17:12934351-12934395                           | NR_002853:196          | Aim           | INSIDE                 | 1.059                                                        | 1.529                          | 692.12             | 1058.04            | 1.618                          | 532.10             | 861.14             |
| A_68_P27540826 | chr10:127774827-127774871                         | NM_026444:-39          | Cs            | PROMOTER               | 1.059                                                        | 1.523                          | 1535.64            | 2339.05            | 1.614                          | 1391.23            | 2244.95            |
| A_68_P29098528 | chr13:64471285-64471329                           | NM_009984:308          | Ctsl          | INSIDE                 | 1.059                                                        | 0.500                          | 1138.75            | 568.84             | 0.529                          | 1060.20            | 561.09             |
| A_68_P25587954 | chr7:148479800-148479844                          | NM_007878:1918         | Drd4          | INSIDE                 | 1.059                                                        | 1.829                          | 1443.30            | 2639.20            | 1.937                          | 1062.54            | 2058.48            |
| A_68_P22019967 | chr3:28981485-28981529                            | NM_001167748:8         | Egfm1         | INSIDE                 | 1.059                                                        | 2.634                          | 290.88             | 766.04             | 2.790                          | 316.41             | 882.72             |
| A_68_P20741944 | chr1:158134876-158134920                          | NM_177838:258          | Fam163a       | INSIDE                 | 1.059                                                        | 1.727                          | 968.26             | 1671.80            | 1.829                          | 885.33             | 1619.25            |
| A_68_P25827954 | chr8:46109471-46109515                            | NM_001081286:73931     | Fat1          | INSIDE                 | 1.059                                                        | 2.821                          | 481.61             | 1358.76            | 2.987                          | 389.89             | 1164.46            |
| A_68_P26614159 | chr9:69860258-69860302                            | NM_001039519:-76       | Gtf2a2        | PROMOTER               | 1.059                                                        | 1.626                          | 2138.39            | 3476.20            | 1.721                          | 1760.89            | 3031.25            |
| A_68_P29952571 | chr14:121309972-121310016                         | NM_023579:-421         | Ipo5          | PROMOTER               | 1.059                                                        | 2.136                          | 1579.28            | 3373.73            | 2.263                          | 1389.96            | 3145.78            |
| A_68_P26022956 | chr8:87501679-87501723                            | NM_008416:947          | Junb          | INSIDE                 | 1.059                                                        | 1.397                          | 1255.84            | 1753.94            | 1.479                          | 1081.04            | 1598.85            |
| A_68_P26159963 | chr8:112486245-112486304                          | NM_212447:-169         | Marveld3      | PROMOTER               | 1.059                                                        | 3.847                          | 195.21             | 751.04             | 4.074                          | 144.33             | 588.01             |
| A_68_P22569091 | chr3:138151998-138152042                          | NM_175224:326          | Metap1        | INSIDE                 | 1.059                                                        | 1.496                          | 1236.11            | 1849.05            | 1.584                          | 1295.42            | 2051.42            |
| A_68_P24140928 | chr5:140807887-140807931                          | NM_008637:33           | Nudt1         | INSIDE                 | 1.059                                                        | 1.682                          | 3017.50            | 5075.70            | 1.782                          | 2160.48            | 3850.28            |
| A_68_P26261059 | chr8:129588231-129588275                          | NM_001122850:297       | Pard3         | INSIDE                 | 1.059                                                        | 2.957                          | 1688.89            | 4993.65            | 3.131                          | 1505.81            | 4715.29            |
| A_68_P31629192 | chr18:37829317-37829361                           | NM_033586:-4650        | Pcdhga3       | PROMOTER               | 1.059                                                        | 1.846                          | 603.99             | 1114.93            | 1.956                          | 533.65             | 1043.59            |
| A_68_P26240712 | chr8:126177554-126177598                          | NM_133955:-252         | Rhou          | PROMOTER               | 1.059                                                        | 1.534                          | 2986.59            | 4580.97            | 1.624                          | 2510.70            | 4077.90            |
| A_68_P26996376 | chr10:21713866-21713910                           | NM_011361:-583         | Sgk1          | PROMOTER               | 1.059                                                        | 1.983                          | 1151.96            | 2283.92            | 2.100                          | 1056.35            | 2218.78            |
| A_68_P32148715 | chr19:47341968-47342012                           | NM_001164717:196911    | Sh3pxd2a      | INSIDE                 | 1.059                                                        | 1.547                          | 774.55             | 1198.18            | 1.639                          | 701.42             | 1149.35            |
| A_68_P31056398 | chr17:13898109-13898153                           | NM_022311:271          | Tete2         | INSIDE                 | 1.059                                                        | 1.539                          | 1718.22            | 2644.64            | 1.629                          | 1469.46            | 2394.26            |
| A_68_P20742450 | chr1:158233703-158233747                          | NM_001134741:-245      | Tdtd5         | DIVERGENT_PROMOTER     | 1.059                                                        | 2.025                          | 1011.27            | 2047.58            | 2.143                          | 886.64             | 1900.28            |
| A_68_P27709779 | chr11:35793475-35793519                           | NM_170779:95           | Wwc1          | INSIDE                 | 1.059                                                        | 0.536                          | 1425.82            | 764.12             | 0.567                          | 1318.86            | 748.40             |
| A_68_P31092364 | chr17:23695056-23695100                           | NM_001033496:6115      | Zfp213        | INSIDE                 | 1.059                                                        | 1.918                          | 698.09             | 1339.16            | 2.031                          | 565.09             | 1147.84            |
| A_68_P22411476 | chr3:108042892-108042936                          | ENSMUST00000119163:-85 |               | PROMOTER               | 1.059                                                        | 2.014                          | 896.15             | 1804.52            | 2.133                          | 703.63             | 1500.63            |
| A_68_P22169028 | chr3:58380988-58381032                            | NM_001040396:431       | 2810407C02Rik | INSIDE                 | 1.058                                                        | 4.492                          | 626.81             | 2815.45            | 4.751                          | 546.52             | 2596.71            |
| A_68_P22888785 | chr4:46463681-46463725                            | NM_130889:-286         | Anp32b        | PROMOTER               | 1.058                                                        | 1.571                          | 1536.02            | 2413.20            | 1.663                          | 1314.47            | 2185.39            |
| A_68_P28091583 | chr11:104411776-104411820                         | NM_145436:136          | Cdc27         | INSIDE                 | 1.058                                                        | 1.646                          | 659.82             | 1086.32            | 1.742                          | 586.91             | 1022.41            |
| A_68_P23342965 | chr4:137513918-137513962                          | NM_199307:95789        | Eec1          | INSIDE                 | 1.058                                                        | 2.303                          | 255.87             | 589.17             | 2.437                          | 195.40             | 476.10             |
| A_68_P31493063 | chr18:11054641-11054685                           | NM_010258:2155         | Gata6         | INSIDE                 | 1.058                                                        | 2.204                          | 806.82             | 1778.10            | 2.332                          | 668.66             | 1559.61            |
| A_68_P25951136 | chr8:72854054-72854098                            | NM_008107:413          | Gdf1          | INSIDE                 | 1.058                                                        | 1.735                          | 818.33             | 1419.97            | 1.835                          | 633.07             | 1161.78            |
| A_68_P23274586 | chr4:125167342-125167386                          | NM_001081097:-710      | Grik3         | PROMOTER               | 1.058                                                        | 1.939                          | 942.42             | 1827.71            | 2.051                          | 774.82             | 1589.31            |
| A_68_P25512006 | chr7:135831552-135831596                          | NM_178641:76696        | Inpp5f        | INSIDE                 | 1.058                                                        | 1.995                          | 1990.64            | 3971.85            | 2.111                          | 1415.63            | 2988.14            |
| A_68_P21571260 | chr2:119570038-119570082                          | NM_146125:1988         | Itpka         | INSIDE                 | 1.058                                                        | 1.756                          | 1020.41            | 1791.98            | 1.857                          | 737.20             | 1369.33            |
| A_68_P31847801 | chr18:77680289-77680333                           | NM_172834:159614       | Loxhd1        | INSIDE                 | 1.058                                                        | 2.145                          | 751.68             | 1612.64            | 2.271                          | 589.52             | 1338.68            |
| A_68_P26133403 | chr8:107898777-107898821                          | NM_001081333:-482      | Plekhg4       | PROMOTER               | 1.058                                                        | 2.482                          | 697.04             | 1729.99            | 2.626                          | 547.69             | 1438.39            |
| A_68_P20779537 | chr1:164670744-164670788                          | NM_001081290:-79       | Prc2c         | PROMOTER               | 1.058                                                        | 2.054                          | 463.32             | 951.72             | 2.173                          | 524.43             | 1139.81            |
| A_68_P24085128 | chr5:129287634-129287678                          | NM_001081388:171581    | Rimbp2        | INSIDE                 | 1.058                                                        | 3.773                          | 684.36             | 2581.84            | 3.992                          | 544.94             | 2175.21            |
| A_68_P28958207 | chr13:38129003-38129047                           | NM_024242:167          | Riok1         | INSIDE                 | 1.058                                                        | 1.391                          | 10890.04           | 15142.99           | 1.471                          | 7834.30            | 11522.48           |
| A_68_P29517812 | chr14:33278202-33278246                           | NM_021712:-188         | Slc18a3       | PROMOTER               | 1.058                                                        | 2.412                          | 641.13             | 1546.44            | 2.551                          | 537.59             | 1371.62            |
| A_68_P24981575 | chr7:17038564-17038608                            | NM_026938:459          | Tmem160       | INSIDE                 | 1.058                                                        | 1.627                          | 2953.81            | 4807.15            | 1.722                          | 2303.19            | 3966.17            |
| A_68_P25506497 | chr7:134754654-134754698                          | NM_177226:3271         | Zfp629        | INSIDE                 | 1.058                                                        | 2.535                          | 994.16             | 2520.31            | 2.683                          | 840.85             | 2255.58            |

| ProbeName      | Target position of probe on CpG island microarray | TargetID                | GeneSymbol    | CpG island Description | Ratio of relative methylation (TiO <sub>2</sub> -NP/Vehicle) | Sham group                     |                    |                    | TiO <sub>2</sub> -H group      |                    |                    |
|----------------|---------------------------------------------------|-------------------------|---------------|------------------------|--------------------------------------------------------------|--------------------------------|--------------------|--------------------|--------------------------------|--------------------|--------------------|
|                |                                                   |                         |               |                        |                                                              | Relative methylation (Cy5/Cy3) | Cy3 signal (Input) | Cy5 signal (MeDIP) | Relative methylation (Cy5/Cy3) | Cy3 signal (Input) | Cy5 signal (MeDIP) |
| A_68_P27581769 | chr1:9050712-9050764                              | ENSMUST00000121861:-138 |               | PROMOTER               | 1.058                                                        | 3.527                          | 343.26             | 1210.85            | 3.731                          | 231.03             | 862.01             |
| A_68_P27932459 | chr11:76308651-76308695                           | NM_198018:14249         | Abr           | INSIDE                 | 1.057                                                        | 0.652                          | 2263.69            | 1474.90            | 0.689                          | 1685.87            | 1161.15            |
| A_68_P20430407 | chr1:91477732-91477776                            | NM_001037136:126369     | Agap1         | INSIDE                 | 1.057                                                        | 2.516                          | 228.92             | 575.93             | 2.660                          | 225.27             | 599.13             |
| A_68_P27089722 | chr10:41239137-41239181                           | NM_016898:-147          | Cd164         | PROMOTER               | 1.057                                                        | 0.442                          | 1605.16            | 708.75             | 0.467                          | 1226.73            | 605.32             |
| A_68_P23327246 | chr4:134762197-134762241                          | NM_013885:66457         | Clic4         | DOWNSTREAM             | 1.057                                                        | 0.528                          | 1258.89            | 664.21             | 0.558                          | 817.20             | 455.72             |
| A_68_P26754210 | chr9:97601436-97601480                            | NM_022319:332128        | Clstn2        | INSIDE                 | 1.057                                                        | 2.034                          | 3961.10            | 8057.47            | 2.150                          | 3618.28            | 7780.61            |
| A_68_P32007551 | chr19:21727608-21727652                           | NM_146096:-168          | Fam108b       | DIVERGENT_PROMOTER     | 1.057                                                        | 2.358                          | 1529.81            | 3607.88            | 2.492                          | 1308.71            | 3260.86            |
| A_68_P20832290 | chr1:174242711-174242760                          | NM_080419:201           | Igsf8         | INSIDE                 | 1.057                                                        | 1.361                          | 2664.04            | 3624.75            | 1.438                          | 2007.34            | 2886.58            |
| A_68_P25953856 | chr8:73285042-73285086                            | NM_183170:-244          | Mpv17l2       | PROMOTER               | 1.057                                                        | 1.367                          | 2760.76            | 3774.32            | 1.445                          | 2194.05            | 3171.31            |
| A_68_P31108289 | chr17:26232390-26232434                           | NM_019731:3             | Nme4          | INSIDE                 | 1.057                                                        | 3.019                          | 629.76             | 1901.12            | 3.190                          | 655.49             | 2090.71            |
| A_68_P20823479 | chr1:172519702-172519746                          | NM_001109985:256        | Noslap        | INSIDE                 | 1.057                                                        | 1.571                          | 561.61             | 882.04             | 1.659                          | 578.11             | 959.34             |
| A_68_P27553494 | chr11:3605439-3605483                             | NM_152818:158446        | Osbp2         | INSIDE                 | 1.057                                                        | 1.867                          | 1416.13            | 2643.41            | 1.974                          | 1031.88            | 2036.59            |
| A_68_P22741774 | chr4:13670169-13670215                            | NM_001111026:-256       | Runx1t1       | PROMOTER               | 1.057                                                        | 1.369                          | 1717.95            | 2352.57            | 1.448                          | 1428.54            | 2068.48            |
| A_68_P23999962 | chr5:114221210-114221254                          | NM_016926:426           | Sart3         | INSIDE                 | 1.057                                                        | 1.502                          | 930.30             | 1397.20            | 1.588                          | 821.62             | 1304.54            |
| A_68_P27807841 | chr11:53841272-53841316                           | NM_019687:298           | Slc22a4       | INSIDE                 | 1.057                                                        | 1.500                          | 1050.08            | 1575.54            | 1.587                          | 882.39             | 1400.04            |
| A_68_P28730243 | chr12:110074111-110074155                         | NM_181328:-46           | Slc25a29      | DIVERGENT_PROMOTER     | 1.057                                                        | 1.662                          | 478.86             | 795.81             | 1.756                          | 448.89             | 788.30             |
| A_68_P20723681 | chr1:154749520-154749564                          | NM_001005507:234        | Smg7          | INSIDE                 | 1.057                                                        | 1.688                          | 2507.49            | 4232.90            | 1.785                          | 2284.79            | 4077.93            |
| A_68_P26447521 | chr9:40965188-40965232                            | NM_176860:367           | Ubash3b       | INSIDE                 | 1.057                                                        | 0.477                          | 1290.92            | 615.80             | 0.504                          | 1015.36            | 511.84             |
| A_68_P30351141 | chr15:76741990-76742034                           | NM_001168276:13866      | Zfp647        | INSIDE                 | 1.057                                                        | 2.842                          | 320.76             | 911.60             | 3.003                          | 313.80             | 942.27             |
| A_68_P28523846 | chr12:72117418-72117462                           | NM_001081195:487        | Arid4a        | INSIDE                 | 1.056                                                        | 1.416                          | 2031.79            | 2876.65            | 1.494                          | 1627.43            | 2432.05            |
| A_68_P28453876 | chr12:56937237-56937281                           | NM_001037756:-94        | Brms1l        | PROMOTER               | 1.056                                                        | 0.462                          | 1942.78            | 897.35             | 0.488                          | 1488.85            | 726.42             |
| A_68_P20887293 | chr1:184447465-184447509                          | NM_009794:128           | Capn2         | INSIDE                 | 1.056                                                        | 0.590                          | 1254.56            | 740.30             | 0.623                          | 981.52             | 611.84             |
| A_68_P24326228 | chr6:29352876-29352920                            | NM_001201378:3973       | Ccdc136       | INSIDE                 | 1.056                                                        | 2.108                          | 529.94             | 1117.19            | 2.227                          | 529.06             | 1178.27            |
| A_68_P25601117 | chr7:150650897-150650941                          | NM_001161624:-3963      | Cdkn1c        | DIVERGENT_PROMOTER     | 1.056                                                        | 2.187                          | 539.69             | 1180.27            | 2.309                          | 488.56             | 1128.06            |
| A_68_P26504859 | chr9:50467279-50467323                            | NM_145614:585           | Dlat          | INSIDE                 | 1.056                                                        | 0.387                          | 1993.49            | 771.49             | 0.409                          | 1668.74            | 681.68             |
| A_68_P30175461 | chr15:43113914-43113958                           | NM_008388:346           | Eif3e         | INSIDE                 | 1.056                                                        | 1.371                          | 7102.04            | 9737.71            | 1.448                          | 5870.64            | 8499.43            |
| A_68_P27849837 | chr11:61498300-61498344                           | NM_178618:411           | Fam83g        | INSIDE                 | 1.056                                                        | 1.530                          | 2112.87            | 3232.09            | 1.615                          | 1749.23            | 2825.58            |
| A_68_P23979337 | chr5:110807040-110807084                          | NM_028596:9084          | Fbrs1l        | INSIDE                 | 1.056                                                        | 2.950                          | 3275.52            | 9661.68            | 3.116                          | 2391.06            | 7451.09            |
| A_68_P20457531 | chr1:95700822-95700866                            | NM_025454:303           | Ing5          | INSIDE                 | 1.056                                                        | 2.268                          | 1986.89            | 4506.64            | 2.394                          | 1654.74            | 3961.71            |
| A_68_P27927253 | chr11:75444214-75444258                           | NM_008916:-285          | Inpp5k        | PROMOTER               | 1.056                                                        | 1.434                          | 1820.73            | 2610.98            | 1.515                          | 1628.18            | 2466.08            |
| A_68_P24009511 | chr5:115880792-115880836                          | NM_008629:1121          | Msi1          | INSIDE                 | 1.056                                                        | 2.141                          | 2233.33            | 4781.69            | 2.260                          | 1746.57            | 3947.79            |
| A_68_P30083239 | chr15:25711450-25711494                           | NM_019472:159168        | Myo10         | INSIDE                 | 1.056                                                        | 2.264                          | 375.50             | 850.17             | 2.390                          | 318.95             | 762.46             |
| A_68_P23134167 | chr4:97418430-97418474                            | NM_001122952:169819     | Nfia          | INSIDE                 | 1.056                                                        | 1.607                          | 573.29             | 921.14             | 1.696                          | 592.97             | 1005.80            |
| A_68_P27922137 | chr11:74537095-74537139                           | NR_037610:244           | Pafah1b1      | INSIDE                 | 1.056                                                        | 0.573                          | 1423.04            | 815.03             | 0.605                          | 1159.20            | 700.99             |
| A_68_P22696143 | chr4:4065948-4065992                              | NM_001002927:-378       | Penk          | PROMOTER               | 1.056                                                        | 2.076                          | 603.07             | 1252.11            | 2.192                          | 548.77             | 1202.84            |
| A_68_P30558910 | chr16:13780799-13780843                           | NM_001039521:29         | Rrm3          | INSIDE                 | 1.056                                                        | 2.008                          | 525.43             | 1055.06            | 2.120                          | 481.71             | 1021.39            |
| A_68_P28635987 | chr12:92885819-92885865                           | NM_175367:139034        | Ston2         | INSIDE                 | 1.056                                                        | 1.874                          | 351.83             | 659.28             | 1.978                          | 282.14             | 558.15             |
| A_68_P27340406 | chr10:90633535-90633579                           | NM_001080129:771        | Tmpo          | INSIDE                 | 1.056                                                        | 0.566                          | 1391.68            | 788.31             | 0.598                          | 1222.33            | 731.42             |
| A_68_P23394412 | chr4:147818678-147818722                          | NM_027873:160           | Ubiad1        | INSIDE                 | 1.056                                                        | 1.902                          | 1383.96            | 2632.85            | 2.010                          | 1072.93            | 2156.11            |
| A_68_P31554072 | chr18:23469485-23469529                           | X95227:781              |               | INSIDE                 | 1.056                                                        | 2.309                          | 2242.99            | 5179.88            | 2.438                          | 1865.05            | 4547.67            |
| A_68_P25906688 | chr8:63369041-63369085                            | NM_028299:-185          | 2700029M09Rik | PROMOTER               | 1.055                                                        | 1.602                          | 1276.12            | 2044.51            | 1.690                          | 1232.98            | 2084.30            |
| A_68_P28269862 | chr12:17331276-17331320                           | NM_001159632:238        | Atp6v1c2      | INSIDE                 | 1.055                                                        | 1.599                          | 1138.87            | 1821.02            | 1.687                          | 927.34             | 1564.40            |
| A_68_P32268348 | chrX:13423751-13423795                            | NM_009806:-105          | Cask          | PROMOTER               | 1.055                                                        | 2.579                          | 462.92             | 1193.84            | 2.721                          | 297.99             | 810.83             |
| A_68_P31125934 | chr17:29232562-29232606                           | NM_007669:1868          | Cdkn1a        | INSIDE                 | 1.055                                                        | 1.586                          | 1440.75            | 2285.51            | 1.673                          | 1257.85            | 2104.35            |
| A_68_P21836888 | chr2:167514985-167515029                          | NM_009883:592           | Cebpβ         | INSIDE                 | 1.055                                                        | 3.231                          | 264.49             | 854.57             | 3.408                          | 241.91             | 824.38             |
| A_68_P21746889 | chr2:151796098-151796142                          | NM_028666:3590          | Fam110a       | INSIDE                 | 1.055                                                        | 3.222                          | 3512.24            | 11317.41           | 3.399                          | 2684.79            | 9124.54            |
| A_68_P31740999 | chr18:58369270-58369314                           | NM_010181:288           | Fbn2          | INSIDE                 | 1.055                                                        | 0.649                          | 1970.59            | 1278.49            | 0.685                          | 1453.34            | 995.20             |
| A_68_P32143277 | chr19:46403804-46403848                           | NM_133694:1153          | Fbx115        | INSIDE                 | 1.055                                                        | 2.039                          | 1473.79            | 3004.47            | 2.151                          | 1315.25            | 2829.17            |
| A_68_P30630415 | chr16:28446508-28446552                           | NM_183064:-1217         | Fgf12         | PROMOTER               | 1.055                                                        | 1.827                          | 1937.39            | 3539.41            | 1.927                          | 1790.36            | 3449.45            |
| A_68_P32401468 | chrX:54756573-54756617                            | NM_001033360:340        | Gpr101        | INSIDE                 | 1.055                                                        | 2.029                          | 1236.25            | 2507.86            | 2.140                          | 643.32             | 1376.75            |
| A_68_P31117112 | chr17:27693865-27693909                           | NM_001166476:289        | Hmgal-rs1     | INSIDE                 | 1.055                                                        | 15.964                         | 895.81             | 14301.03           | 16.843                         | 740.24             | 12468.17           |

| ProbeName      | Target position of probe on CpG island microarray | TargetID                | GeneSymbol    | CpG island Description | Ratio of relative methylation (TiO <sub>2</sub> -NP/Vehicle) | Sham group                     |                    |                    | TiO <sub>2</sub> -H group      |                    |                    |
|----------------|---------------------------------------------------|-------------------------|---------------|------------------------|--------------------------------------------------------------|--------------------------------|--------------------|--------------------|--------------------------------|--------------------|--------------------|
|                |                                                   |                         |               |                        |                                                              | Relative methylation (Cy5/Cy3) | Cy3 signal (Input) | Cy5 signal (MeDIP) | Relative methylation (Cy5/Cy3) | Cy3 signal (Input) | Cy5 signal (MeDIP) |
| A_68_P24990865 | chr7:19590861-19590905                            | NM_178757:1469          | Irf2bp1       | INSIDE                 | 1.055                                                        | 2.267                          | 1171.62            | 2656.17            | 2.392                          | 1123.33            | 2686.48            |
| A_68_P30660049 | chr16:33829724-33829768                           | NM_001145884:-4         | Irgb5         | PROMOTER               | 1.055                                                        | 1.430                          | 886.09             | 1266.92            | 1.508                          | 801.75             | 1208.98            |
| A_68_P20451521 | chr1:94745114-94745158                            | NR_029559:-1818         | Mir149        | PROMOTER               | 1.055                                                        | 2.266                          | 13460.81           | 30504.50           | 2.391                          | 9543.91            | 22820.53           |
| A_68_P24009623 | chr5:115897106-115897158                          | NM_008629:17439         | Msi1          | INSIDE                 | 1.055                                                        | 2.116                          | 312.79             | 661.78             | 2.232                          | 260.78             | 581.96             |
| A_68_P31110247 | chr17:26576151-26576195                           | NM_001081656:24263      | Neur1b        | INSIDE                 | 1.055                                                        | 2.392                          | 794.24             | 1899.89            | 2.523                          | 771.29             | 1945.87            |
| A_68_P27638931 | chr11:21903874-21903918                           | NM_011023:-2242         | Otx1          | PROMOTER               | 1.055                                                        | 1.400                          | 1731.64            | 2424.22            | 1.477                          | 1488.25            | 2197.65            |
| A_68_P22567229 | chr3:137806950-137806994                          | NM_175389:471           | Rg9mtd2       | INSIDE                 | 1.055                                                        | 2.151                          | 521.04             | 1120.51            | 2.270                          | 467.62             | 1061.40            |
| A_68_P27290119 | chr10:80961961-80962005                           | NM_010102:900           | S1pr4         | INSIDE                 | 1.055                                                        | 1.517                          | 951.89             | 1444.04            | 1.600                          | 822.44             | 1315.83            |
| A_68_P26022400 | chr8:87396607-87396651                            | NM_001168244:472        | Sycc2         | INSIDE                 | 1.055                                                        | 2.054                          | 743.06             | 1526.57            | 2.167                          | 689.01             | 1493.41            |
| A_68_P31020006 | chr17:5941362-5941406                             | NM_001113352:105        | Synj2         | INSIDE                 | 1.055                                                        | 2.227                          | 728.88             | 1623.51            | 2.351                          | 685.94             | 1612.60            |
| A_68_P21571904 | chr2:119698870-119698914                          | ENSMUST00000120952:5247 |               | DOWNSTREAM             | 1.055                                                        | 4.291                          | 779.40             | 3344.27            | 4.526                          | 596.63             | 2700.21            |
| A_68_P27680364 | chr11:30655100-30655144                           | ENSMUST00000121590:-161 |               | PROMOTER               | 1.055                                                        | 3.041                          | 761.54             | 2315.47            | 3.209                          | 711.79             | 2284.05            |
| A_68_P26202775 | chr8:119960432-119960476                          | NM_028941:87385         | 4933407C03Rik | INSIDE                 | 1.054                                                        | 3.269                          | 2328.27            | 7610.33            | 3.445                          | 1725.53            | 5943.98            |
| A_68_P23069985 | chr4:84321596-84321640                            | NM_172870:-628          | Bnc2          | PROMOTER               | 1.054                                                        | 1.518                          | 1443.33            | 2191.06            | 1.600                          | 1132.77            | 1812.62            |
| A_68_P26020781 | chr8:87141111-87141156                            | NM_007578:201871        | Caena1a       | INSIDE                 | 1.054                                                        | 1.955                          | 1845.60            | 3608.54            | 2.061                          | 1385.11            | 2854.61            |
| A_68_P24063260 | chr5:125342106-125342150                          | NM_144819:463           | Ccdc92        | INSIDE                 | 1.054                                                        | 1.558                          | 1062.96            | 1655.96            | 1.642                          | 875.82             | 1438.27            |
| A_68_P26875427 | chr9:119883344-119883388                          | NM_153287:10410         | Csrnp1        | INSIDE                 | 1.054                                                        | 4.579                          | 401.52             | 1838.77            | 4.825                          | 340.88             | 1644.75            |
| A_68_P22569292 | chr3:138190910-138190954                          | NM_007917:1778          | Eif4e         | INSIDE                 | 1.054                                                        | 1.403                          | 1694.19            | 2377.79            | 1.479                          | 1461.31            | 2161.80            |
| A_68_P24084081 | chr5:129107610-129107654                          | NM_175284:652           | Fzd10         | INSIDE                 | 1.054                                                        | 1.559                          | 2088.20            | 3254.69            | 1.643                          | 1626.70            | 2673.19            |
| A_68_P22565471 | chr3:137528339-137528383                          | NM_016750:798           | H2afz         | INSIDE                 | 1.054                                                        | 1.339                          | 3314.99            | 4440.02            | 1.411                          | 2522.63            | 3559.91            |
| A_68_P25186205 | chr7:73224603-73224647                            | NM_024439:90            | H47           | INSIDE                 | 1.054                                                        | 1.539                          | 954.93             | 1469.86            | 1.622                          | 799.43             | 1296.53            |
| A_68_P20600072 | chr1:130256315-130256359                          | NM_008567:-103          | Mcm6          | PROMOTER               | 1.054                                                        | 0.409                          | 1603.33            | 656.47             | 0.432                          | 1304.49            | 563.18             |
| A_68_P21150010 | chr2:38566321-38566365                            | NM_139051:3720          | Nr5a1         | INSIDE                 | 1.054                                                        | 0.476                          | 1375.42            | 654.74             | 0.502                          | 1174.48            | 589.04             |
| A_68_P27896908 | chr11:69571787-69571831                           | NM_009089:-83           | Poir2a        | PROMOTER               | 1.054                                                        | 1.652                          | 780.39             | 1288.81            | 1.741                          | 709.33             | 1234.91            |
| A_68_P23814584 | chr5:76613501-76613545                            | NM_011626:618           | Tmem165       | INSIDE                 | 1.054                                                        | 5.120                          | 893.40             | 4574.28            | 5.397                          | 871.61             | 4704.38            |
| A_68_P24630039 | chr6:89785616-89785660                            | NM_053221:9893          | Vmn1r42       | DOWNSTREAM             | 1.054                                                        | 2.230                          | 1167.94            | 2603.99            | 2.351                          | 1040.78            | 2446.92            |
| A_68_P30509169 | chr16:4268211-4268255                             |                         |               | Unknown                | 1.054                                                        | 2.676                          | 320.66             | 858.12             | 2.821                          | 314.92             | 888.35             |
| A_68_P21041599 | chr2:18722024-18722068                            | AK018938:-386           |               | PROMOTER               | 1.054                                                        | 2.464                          | 1024.88            | 2525.63            | 2.597                          | 863.48             | 2242.86            |
| A_68_P26253145 | chr8:128193794-128193838                          | NM_028908:99            | 4933403G14Rik | INSIDE                 | 1.053                                                        | 2.251                          | 1672.01            | 3764.39            | 2.370                          | 1482.81            | 3513.91            |
| A_68_P26617807 | chr9:70527537-70527581                            | NM_007399:751           | Adam10        | INSIDE                 | 1.053                                                        | 1.490                          | 1177.32            | 1753.86            | 1.568                          | 890.70             | 1396.93            |
| A_68_P27566543 | chr11:5965060-5965104                             | NM_001174053:669        | Camk2b        | INSIDE                 | 1.053                                                        | 2.056                          | 1793.20            | 3686.79            | 2.165                          | 1521.95            | 3295.16            |
| A_68_P21836882 | chr2:167514407-167514451                          | NM_009883:14            | Cebpb         | INSIDE                 | 1.053                                                        | 1.895                          | 1684.07            | 3191.26            | 1.995                          | 1550.56            | 3093.73            |
| A_68_P20442010 | chr1:93263130-93263174                            | NM_173395:146           | Fam132b       | INSIDE                 | 1.053                                                        | 0.591                          | 1211.65            | 715.90             | 0.622                          | 950.85             | 591.53             |
| A_68_P20025037 | chr1:9957276-9957320                              | NM_145692:41903         | Lrrc67        | DOWNSTREAM             | 1.053                                                        | 1.443                          | 1283.38            | 1851.83            | 1.519                          | 1099.49            | 1669.96            |
| A_68_P22705748 | chr4:6380821-6380865                              | NM_010945:576           | Nsmaf         | INSIDE                 | 1.053                                                        | 1.963                          | 953.82             | 1872.73            | 2.067                          | 863.77             | 1785.63            |
| A_68_P30346556 | chr15:76004532-76004576                           | NM_201394:21586         | Plec          | INSIDE                 | 1.053                                                        | 2.876                          | 325.47             | 936.00             | 3.028                          | 257.29             | 779.00             |
| A_68_P29950625 | chr14:120877439-120877483                         | NM_029519:-222          | Rap2a         | PROMOTER               | 1.053                                                        | 1.376                          | 1520.92            | 2092.20            | 1.448                          | 1218.89            | 1764.88            |
| A_68_P25265265 | chr7:87343187-87343231                            | NM_013659:11482         | Sema4b        | INSIDE                 | 1.053                                                        | 1.391                          | 1203.42            | 1674.53            | 1.465                          | 939.80             | 1377.09            |
| A_68_P21999683 | chr3:25043045-25043089                            | AK054291:117            |               | INSIDE                 | 1.053                                                        | 2.391                          | 1303.05            | 3115.62            | 2.517                          | 1121.31            | 2822.76            |
| A_68_P27212538 | chr10:67011354-67011398                           | NM_001005419:327        | Ado           | INSIDE                 | 1.052                                                        | 2.588                          | 613.18             | 1587.05            | 2.722                          | 568.66             | 1547.97            |
| A_68_P24797811 | chr6:120244232-120244276                          | NM_198884:323           | B4galnt3      | INSIDE                 | 1.052                                                        | 3.257                          | 1237.02            | 4029.08            | 3.428                          | 1061.68            | 3639.20            |
| A_68_P27183503 | chr10:61441267-61441311                           | NM_007731:568           | Col13a1       | INSIDE                 | 1.052                                                        | 1.653                          | 1199.32            | 1982.09            | 1.738                          | 1046.49            | 1818.82            |
| A_68_P25587956 | chr7:148480038-148480082                          | NM_007878:2156          | Drd4          | INSIDE                 | 1.052                                                        | 1.413                          | 1485.78            | 2099.20            | 1.486                          | 1150.20            | 1709.28            |
| A_68_P27561403 | chr11:4998729-4998773                             | NM_007968:330           | Ewsr1         | INSIDE                 | 1.052                                                        | 0.612                          | 1267.66            | 776.17             | 0.644                          | 1084.66            | 698.96             |
| A_68_P24290982 | chr6:22306343-22306387                            | NM_138587:-283          | Fam3c         | PROMOTER               | 1.052                                                        | 0.643                          | 1268.33            | 815.93             | 0.677                          | 1112.26            | 752.57             |
| A_68_P26248333 | chr8:127422026-127422070                          | NM_001111141:263        | Gm505         | INSIDE                 | 1.052                                                        | 1.953                          | 2039.54            | 3984.00            | 2.055                          | 1734.51            | 3563.75            |
| A_68_P20391719 | chr1:82287804-82287848                            | NM_010570:188           | Irs1          | INSIDE                 | 1.052                                                        | 1.899                          | 821.78             | 1560.92            | 1.999                          | 696.01             | 1391.34            |
| A_68_P25034849 | chr7:31852601-31852645                            | NM_144556:7669          | Lgi4          | INSIDE                 | 1.052                                                        | 2.127                          | 1036.33            | 2204.40            | 2.238                          | 956.97             | 2141.61            |
| A_68_P28155818 | chr11:115719846-115719890                         | NM_145438:34497         | Llgl2         | DOWNSTREAM             | 1.052                                                        | 1.669                          | 1419.85            | 2369.94            | 1.757                          | 1131.73            | 1987.96            |
| A_68_P31112804 | chr17:26988009-26988053                           | NM_008700:-9520         | Nkx2-5        | PROMOTER               | 1.052                                                        | 0.586                          | 1144.98            | 671.45             | 0.617                          | 835.57             | 515.69             |
| A_68_P28068129 | chr11:100302265-100302309                         | NM_026561:117           | Nt5c3l        | INSIDE                 | 1.052                                                        | 0.487                          | 1655.61            | 805.64             | 0.512                          | 1315.62            | 673.52             |

| ProbeName      | Target position of probe on CpG island microarray | TargetID                | GeneSymbol    | CpG island Description | Ratio of relative methylation (TiO <sub>2</sub> -NP/Vehicle) | Sham group                     |                    |                    | TiO <sub>2</sub> -H group      |                    |                    |
|----------------|---------------------------------------------------|-------------------------|---------------|------------------------|--------------------------------------------------------------|--------------------------------|--------------------|--------------------|--------------------------------|--------------------|--------------------|
|                |                                                   |                         |               |                        |                                                              | Relative methylation (Cy5/Cy3) | Cy3 signal (Input) | Cy5 signal (MeDIP) | Relative methylation (Cy5/Cy3) | Cy3 signal (Input) | Cy5 signal (MeDIP) |
| A_68_P21095897 | chr2:29083296-29083340                            | NM_133500:20242         | Ntng2         | INSIDE                 | 1.052                                                        | 1.704                          | 513.89             | 875.65             | 1.793                          | 421.70             | 755.91             |
| A_68_P31757527 | chr18:61558226-61558270                           | NM_133249:1837          | Pparg1b       | INSIDE                 | 1.052                                                        | 1.715                          | 1483.80            | 2544.46            | 1.803                          | 1200.70            | 2165.31            |
| A_68_P25502256 | chr7:133936075-133936119                          | NM_019674:-111          | Ppp4c         | PROMOTER               | 1.052                                                        | 1.828                          | 872.59             | 1594.69            | 1.923                          | 761.80             | 1465.02            |
| A_68_P31375071 | chr17:79419979-79420023                           | NM_001171004:156        | Prkd3         | INSIDE                 | 1.052                                                        | 1.482                          | 1005.33            | 1490.25            | 1.559                          | 937.40             | 1461.61            |
| A_68_P29716897 | chr14:73725909-73725953                           | NM_009029:-332          | Rb1           | PROMOTER               | 1.052                                                        | 2.514                          | 1631.85            | 4102.83            | 2.645                          | 1447.63            | 3828.78            |
| A_68_P21750310 | chr2:152460214-152460258                          | NM_009047:7493          | Rem1          | INSIDE                 | 1.052                                                        | 1.755                          | 525.16             | 921.46             | 1.845                          | 396.97             | 732.43             |
| A_68_P27284267 | chr10:80069318-80069362                           | NM_019575:3714          | Scamp4        | INSIDE                 | 1.052                                                        | 2.011                          | 822.67             | 1654.62            | 2.115                          | 638.23             | 1349.88            |
| A_68_P20946921 | chr1:194861981-194862025                          | NM_181546:-110          | Syt14         | PROMOTER               | 1.052                                                        | 1.607                          | 2183.09            | 3508.01            | 1.691                          | 1720.17            | 2908.36            |
| A_68_P32340726 | chrX:39421609-39421653                            | NM_009688:618           | Xiap          | INSIDE                 | 1.052                                                        | 1.914                          | 570.87             | 1092.78            | 2.014                          | 324.52             | 653.44             |
| A_68_P20141345 | chr1:34986894-34986938                            |                         |               | Unknown                | 1.052                                                        | 2.407                          | 845.36             | 2034.56            | 2.531                          | 767.32             | 1942.04            |
| A_68_P32975994 | chr12:18394285-18394329                           | ENSMUST00000080502:-254 |               | PROMOTER               | 1.052                                                        | 1.915                          | 940.51             | 1800.94            | 2.015                          | 983.34             | 1981.19            |
| A_68_P21587204 | chr2:122456531-122456575                          | NM_001004174:-7070      | AA467197      | PROMOTER               | 1.051                                                        | 1.751                          | 540.62             | 946.38             | 1.839                          | 454.27             | 835.39             |
| A_68_P21317589 | chr2:70956028-70956072                            | NM_028593:-60           | Cybrd1        | PROMOTER               | 1.051                                                        | 1.795                          | 2991.99            | 5371.34            | 1.887                          | 2390.59            | 4510.55            |
| A_68_P32553702 | chrX:96332024-96332068                            | NM_010110:578           | Efnb1         | INSIDE                 | 1.051                                                        | 2.353                          | 702.59             | 1653.05            | 2.473                          | 475.70             | 1176.47            |
| A_68_P22045622 | chr3:33919516-33919560                            | NM_001113188:538        | Fxr1          | INSIDE                 | 1.051                                                        | 1.621                          | 2612.45            | 4233.95            | 1.703                          | 2544.75            | 4334.78            |
| A_68_P23600191 | chr5:35731800-35731844                            | NM_010445:57            | Hmx1          | INSIDE                 | 1.051                                                        | 2.439                          | 829.20             | 2022.42            | 2.564                          | 790.07             | 2026.07            |
| A_68_P27902205 | chr11:70514397-70514441                           | NM_153103:369           | Kif1c         | INSIDE                 | 1.051                                                        | 0.629                          | 1261.57            | 794.05             | 0.662                          | 1082.59            | 716.25             |
| A_68_P28049242 | chr11:97048472-97048516                           | NM_008379:712           | Kpnb1         | INSIDE                 | 1.051                                                        | 1.380                          | 1851.96            | 2556.02            | 1.450                          | 1415.02            | 2051.84            |
| A_68_P29629466 | chr14:58318760-58318804                           | NM_015771:46178         | Lats2         | INSIDE                 | 1.051                                                        | 2.590                          | 486.01             | 1258.84            | 2.723                          | 490.72             | 1336.23            |
| A_68_P25094514 | chr7:52949352-52949396                            | NM_001033356:9591       | Ntn5          | INSIDE                 | 1.051                                                        | 3.158                          | 680.85             | 2150.12            | 3.318                          | 570.34             | 1892.21            |
| A_68_P26609887 | chr9:69138471-69138515                            | NM_013646:636884        | Rora          | INSIDE                 | 1.051                                                        | 2.963                          | 682.70             | 2023.12            | 3.113                          | 648.29             | 2018.35            |
| A_68_P23768851 | chr5:67999755-67999799                            | NM_001033415:6555       | Shisa3        | INSIDE                 | 1.051                                                        | 0.329                          | 1560.48            | 514.04             | 0.346                          | 1366.36            | 473.21             |
| A_68_P27765282 | chr11:45793719-45793763                           | NM_173384:-71           | Sox30         | PROMOTER               | 1.051                                                        | 1.575                          | 1214.37            | 1912.48            | 1.654                          | 973.82             | 1611.11            |
| A_68_P21833061 | chr2:166821891-166821935                          | NM_001109905:-134       | Stau1         | PROMOTER               | 1.051                                                        | 0.519                          | 1805.84            | 937.10             | 0.545                          | 1488.97            | 812.04             |
| A_68_P29052711 | chr13:55098855-55098899                           | NM_153131:48084         | Unc5a         | INSIDE                 | 1.051                                                        | 2.447                          | 2647.86            | 6479.58            | 2.572                          | 2006.29            | 5160.56            |
| A_68_P27564655 | chr11:5616910-5616954                             | NM_178623:24247         | Urgcp         | INSIDE                 | 1.051                                                        | 2.198                          | 475.93             | 1046.27            | 2.310                          | 430.77             | 994.96             |
| A_68_P27926119 | chr11:75258911-75258955                           | NM_138950:9287          | Wdr81         | INSIDE                 | 1.051                                                        | 2.013                          | 1915.73            | 3855.87            | 2.115                          | 1500.98            | 3174.13            |
| A_68_P22148835 | chr3:54437544-54437588                            | ENSMUST00000172420:2206 |               | INSIDE                 | 1.051                                                        | 2.079                          | 592.78             | 1232.16            | 2.184                          | 496.45             | 1084.27            |
| A_68_P32070028 | chr19:32463753-32463797                           | NR_033198:69            | 2700046G09Rik | INSIDE                 | 1.050                                                        | 0.424                          | 1428.36            | 605.23             | 0.445                          | 1170.14            | 520.77             |
| A_68_P26202778 | chr8:119960709-119960753                          | NM_028941:87661         | 4933407C03Rik | INSIDE                 | 1.050                                                        | 1.915                          | 383.68             | 734.86             | 2.011                          | 334.99             | 673.69             |
| A_68_P30512949 | chr16:4964346-4964390                             | NM_028301:-38           | Anks3         | PROMOTER               | 1.050                                                        | 2.010                          | 2053.66            | 4127.84            | 2.111                          | 1559.87            | 3292.99            |
| A_68_P25957040 | chr8:74005621-74005665                            | NM_001164679:4324       | Ano8          | INSIDE                 | 1.050                                                        | 3.611                          | 1476.63            | 5332.22            | 3.793                          | 1238.30            | 4696.38            |
| A_68_P21013692 | chr2:12931915-12931959                            | NM_153155:555           | C1ql3         | INSIDE                 | 1.050                                                        | 1.576                          | 1567.65            | 2470.71            | 1.654                          | 1278.29            | 2114.85            |
| A_68_P26235087 | chr8:125202646-125202690                          | NM_001109873:-593       | Cbfa2i3       | PROMOTER               | 1.050                                                        | 1.683                          | 682.28             | 1148.03            | 1.767                          | 573.00             | 1012.51            |
| A_68_P28727030 | chr12:109512594-109512638                         | NM_001159910:1011       | Ccdc85c       | INSIDE                 | 1.050                                                        | 0.453                          | 1493.68            | 676.58             | 0.476                          | 1113.60            | 529.76             |
| A_68_P30540341 | chr16:9992483-9992527                             | NM_008170:122           | Grin2a        | INSIDE                 | 1.050                                                        | 1.990                          | 1252.76            | 2493.26            | 2.090                          | 1058.42            | 2212.56            |
| A_68_P20587179 | chr1:127808497-127808541                          | NM_145100:273           | Lypd1         | INSIDE                 | 1.050                                                        | 2.114                          | 790.24             | 1670.53            | 2.219                          | 786.51             | 1745.39            |
| A_68_P27282701 | chr10:79819469-79819513                           | NM_183152:287           | Plk5          | INSIDE                 | 1.050                                                        | 1.401                          | 1074.47            | 1505.53            | 1.471                          | 923.17             | 1357.77            |
| A_68_P24117611 | chr5:136209975-136210019                          | NM_008898:44913         | Por           | INSIDE                 | 1.050                                                        | 2.162                          | 762.60             | 1648.69            | 2.269                          | 697.84             | 1583.39            |
| A_68_P23012915 | chr4:71861101-71861145                            | NM_011599:831           | Tie1          | INSIDE                 | 1.050                                                        | 1.865                          | 1133.65            | 2114.25            | 1.958                          | 1008.58            | 1975.09            |
| A_68_P32143438 | chr19:46431466-46431510                           | NM_029186:119           | Tmem180       | INSIDE                 | 1.050                                                        | 1.925                          | 722.99             | 1391.54            | 2.021                          | 591.88             | 1196.06            |
| A_68_P32144311 | chr19:46577241-46577285                           | NM_053100:1125          | Trim8         | INSIDE                 | 1.050                                                        | 1.599                          | 754.38             | 1206.13            | 1.678                          | 670.76             | 1125.53            |
| A_68_P30351138 | chr15:76741648-76741692                           | NM_001168276:14208      | Zfp647        | INSIDE                 | 1.050                                                        | 1.826                          | 512.82             | 936.61             | 1.917                          | 428.50             | 821.38             |
| A_68_P27288888 | chr10:80788031-80788075                           | NM_027381:4205          | 2510012J08Rik | INSIDE                 | 1.049                                                        | 2.327                          | 867.89             | 2019.48            | 2.441                          | 819.38             | 2000.17            |
| A_68_P22128531 | chr3:51028825-51028869                            | NM_009834:478           | Cern4l        | INSIDE                 | 1.049                                                        | 2.349                          | 1254.26            | 2945.68            | 2.463                          | 1059.50            | 2610.00            |
| A_68_P28992095 | chr13:43880702-43880746                           | NM_009856:249           | Cd83          | INSIDE                 | 1.049                                                        | 1.769                          | 1338.22            | 2367.69            | 1.855                          | 1251.62            | 2322.16            |
| A_68_P20741943 | chr1:158134761-158134805                          | NM_177838:374           | Fam163a       | INSIDE                 | 1.049                                                        | 0.681                          | 2702.78            | 1839.89            | 0.714                          | 2009.85            | 1435.20            |
| A_68_P29571201 | chr14:46149666-46149710                           | NM_146054:52            | Fermt2        | INSIDE                 | 1.049                                                        | 1.977                          | 456.96             | 903.43             | 2.074                          | 472.78             | 980.78             |
| A_68_P27812595 | chr11:54716247-54716291                           | NM_001083929:-86        | Gpx3          | PROMOTER               | 1.049                                                        | 1.768                          | 979.29             | 1731.09            | 1.854                          | 844.59             | 1566.24            |
| A_68_P31255288 | chr17:56465651-56465695                           | NM_172132:200           | Kdm4b         | INSIDE                 | 1.049                                                        | 3.446                          | 1077.34            | 3712.56            | 3.616                          | 972.87             | 3517.87            |
| A_68_P21111931 | chr2:31742789-31742833                            | NM_011836:10            | Lamc3         | INSIDE                 | 1.049                                                        | 4.163                          | 2263.15            | 9421.92            | 4.369                          | 1664.87            | 7274.08            |



| ProbeName      | Target position of probe on CpG island microarray | TargetID           | GeneSymbol    | CpG island Description | Ratio of relative methylation (TiO <sub>2</sub> -NP/Vehicle) | Sham group                     |                    |                    | TiO <sub>2</sub> -H group      |                    |                    |
|----------------|---------------------------------------------------|--------------------|---------------|------------------------|--------------------------------------------------------------|--------------------------------|--------------------|--------------------|--------------------------------|--------------------|--------------------|
|                |                                                   |                    |               |                        |                                                              | Relative methylation (Cy5/Cy3) | Cy3 signal (Input) | Cy5 signal (MeDIP) | Relative methylation (Cy5/Cy3) | Cy3 signal (Input) | Cy5 signal (MeDIP) |
| A_68_P23839618 | chr5:81758787-81758831                            | NM_198702:308191   | Lphn3         | INSIDE                 | 1.049                                                        | 1.859                          | 1201.07            | 2233.14            | 1.950                          | 1092.70            | 2130.77            |
| A_68_P23324341 | chr4:134259355-134259399                          | NM_207237:829      | Man1c1        | INSIDE                 | 1.049                                                        | 2.118                          | 1675.38            | 3548.46            | 2.222                          | 1487.47            | 3305.27            |
| A_68_P27971660 | chr1:183276484-83276528                           | NM_080453:-43      | Mmp28         | PROMOTER               | 1.049                                                        | 1.399                          | 1238.65            | 1732.52            | 1.468                          | 1036.90            | 1521.65            |
| A_68_P23617869 | chr5:38550496-38550540                            | NM_010942:188      | Nsg1          | INSIDE                 | 1.049                                                        | 0.548                          | 1884.92            | 1033.36            | 0.575                          | 1339.06            | 770.13             |
| A_68_P25089828 | chr7:52125095-52125139                            | NM_133949:42       | Ptov1         | INSIDE                 | 1.049                                                        | 1.362                          | 1562.37            | 2128.62            | 1.430                          | 1255.48            | 1795.11            |
| A_68_P28774234 | chr12:118772641-118772685                         | NM_175930:17711    | Rapgef5       | INSIDE                 | 1.049                                                        | 2.364                          | 335.52             | 793.07             | 2.481                          | 270.92             | 672.04             |
| A_68_P25349895 | chr7:104474236-104474280                          | NM_001177412:216   | Usp35         | INSIDE                 | 1.049                                                        | 2.001                          | 604.08             | 1208.82            | 2.099                          | 669.02             | 1404.04            |
| A_68_P30401628 | chr15:85412235-85412279                           | NM_009528:-5       | Wnt7b         | PROMOTER               | 1.049                                                        | 3.132                          | 351.23             | 1100.02            | 3.286                          | 387.70             | 1274.05            |
| A_68_P23321770 | chr4:133801322-133801366                          | NM_024215:162      | Zfp593        | INSIDE                 | 1.049                                                        | 1.984                          | 1228.98            | 2437.74            | 2.080                          | 1050.59            | 2185.13            |
| A_68_P26465225 | chr9:43828528-43828572                            |                    |               | Unknown                | 1.049                                                        | 4.163                          | 480.45             | 2000.05            | 4.367                          | 447.19             | 1952.97            |
| A_68_P28089255 | chr11:103995098-103995142                         | NM_007762:925      | Ctfrh1        | INSIDE                 | 1.048                                                        | 2.180                          | 1742.31            | 3797.37            | 2.284                          | 1525.84            | 3485.54            |
| A_68_P30367146 | chr15:79376680-79376724                           | NM_199079:287      | Ddx17         | INSIDE                 | 1.048                                                        | 1.518                          | 1520.01            | 2306.90            | 1.591                          | 1297.53            | 2064.19            |
| A_68_P32463901 | chrX:70885738-70885782                            | NM_029352:981      | Dusp9         | INSIDE                 | 1.048                                                        | 2.255                          | 1021.84            | 2304.06            | 2.364                          | 782.32             | 1849.10            |
| A_68_P25565214 | chr7:144506892-144506936                          | NM_001113414:-786  | Ebf3          | PROMOTER               | 1.048                                                        | 1.828                          | 481.15             | 879.64             | 1.917                          | 463.32             | 888.02             |
| A_68_P23200234 | chr4:108952731-108952775                          | NM_007943:-127     | Eps15         | PROMOTER               | 1.048                                                        | 1.629                          | 2198.26            | 3581.63            | 1.707                          | 1811.87            | 3093.69            |
| A_68_P25828113 | chr8:46129756-46129800                            | NM_001081286:94217 | Fat1          | INSIDE                 | 1.048                                                        | 3.776                          | 2422.66            | 9146.86            | 3.955                          | 1772.67            | 7010.95            |
| A_68_P26141795 | chr8:109394997-109395041                          | NM_008217:877      | Has3          | INSIDE                 | 1.048                                                        | 2.766                          | 1222.06            | 3379.71            | 2.899                          | 903.80             | 2619.99            |
| A_68_P20156459 | chr1:37947346-37947390                            | NM_027098:-29      | Mrpl30        | DIVERGENT_PROMOTER     | 1.048                                                        | 0.644                          | 2410.00            | 1552.09            | 0.675                          | 1960.83            | 1323.03            |
| A_68_P24993781 | chr7:20109373-20109417                            | NM_027116:5315     | Nkpd1         | INSIDE                 | 1.048                                                        | 2.383                          | 1383.75            | 3297.38            | 2.496                          | 1230.05            | 3070.42            |
| A_68_P24754175 | chr6:112439230-112439274                          | NM_001081147:550   | Oxtr          | INSIDE                 | 1.048                                                        | 1.991                          | 636.99             | 1268.46            | 2.087                          | 605.87             | 1264.22            |
| A_68_P24618287 | chr6:87761915-87761959                            | NM_001039394:-163  | Rab43         | PROMOTER               | 1.048                                                        | 3.263                          | 6897.71            | 22505.88           | 3.419                          | 4611.99            | 15767.68           |
| A_68_P31925086 | chr19:4787882-4787926                             | NM_009032:5973     | Rbm4          | INSIDE                 | 1.048                                                        | 3.117                          | 2028.35            | 6322.46            | 3.267                          | 1572.73            | 5137.99            |
| A_68_P27641466 | chr11:22412783-22412827                           | NM_153596:519      | Tmem17        | INSIDE                 | 1.048                                                        | 0.584                          | 1407.57            | 821.64             | 0.612                          | 1229.51            | 752.42             |
| A_68_P26644961 | chr9:75458869-75458913                            | NM_016711:242      | Tmod2         | INSIDE                 | 1.048                                                        | 2.402                          | 631.49             | 1517.09            | 2.519                          | 584.43             | 1471.94            |
| A_68_P29097418 | chr13:64254293-64254337                           | NM_175494:193      | Zfp367        | INSIDE                 | 1.048                                                        | 1.750                          | 908.79             | 1590.78            | 1.835                          | 743.70             | 1364.40            |
| A_68_P24862403 | A_68_P24862403                                    |                    |               | Unknown                | 1.048                                                        | 20.204                         | 320.02             | 6465.77            | 21.166                         | 244.54             | 5176.12            |
| A_68_P26584120 | chr9:64659199-64659243                            | NM_001162917:403   | Dennd4a       | INSIDE                 | 1.047                                                        | 0.596                          | 1289.86            | 768.18             | 0.624                          | 1185.43            | 739.14             |
| A_68_P23981795 | chr5:111199426-111199470                          | NM_029337:288      | Epa400        | INSIDE                 | 1.047                                                        | 4.730                          | 11570.70           | 54734.01           | 4.952                          | 8287.44            | 41043.16           |
| A_68_P23270839 | chr4:124558845-124558889                          | NM_177671:-162     | Epha10        | PROMOTER               | 1.047                                                        | 0.668                          | 1790.53            | 1196.25            | 0.699                          | 1538.33            | 1075.72            |
| A_68_P28492940 | chr12:66018887-66018931                           | NM_001025605:11    | Gm527         | INSIDE                 | 1.047                                                        | 2.490                          | 1105.72            | 2753.14            | 2.607                          | 999.15             | 2604.59            |
| A_68_P24904451 | chr6:142363030-142363089                          | NM_145572:58570    | Gys2          | DOWNSTREAM             | 1.047                                                        | 2.695                          | 1234.14            | 3325.79            | 2.822                          | 795.13             | 2243.52            |
| A_68_P31208331 | chr17:46818042-46818086                           | NM_010787:-21      | Mea1          | DIVERGENT_PROMOTER     | 1.047                                                        | 2.264                          | 4024.30            | 9112.49            | 2.370                          | 2451.76            | 5811.57            |
| A_68_P28057821 | chr11:98544135-98544179                           | NM_009439:289      | Psmc3         | INSIDE                 | 1.047                                                        | 1.824                          | 2282.55            | 4163.46            | 1.909                          | 1794.48            | 3426.56            |
| A_68_P23018374 | chr4:73436830-73436874                            | NM_001017427:-346  | Rasef         | PROMOTER               | 1.047                                                        | 2.450                          | 436.09             | 1068.61            | 2.565                          | 439.75             | 1128.06            |
| A_68_P21000493 | chr2:10294275-10294319                            | NM_001198809:234   | Sfmbt2        | INSIDE                 | 1.047                                                        | 1.768                          | 1264.93            | 2236.73            | 1.852                          | 1200.31            | 2222.74            |
| A_68_P32005495 | chr19:21347202-21347246                           | NM_009551:457      | Zfand5        | INSIDE                 | 1.047                                                        | 1.709                          | 350.84             | 599.41             | 1.789                          | 366.47             | 655.58             |
| A_68_P24951677 | chr7:4982359-4982403                              | NM_001033383:10403 | Zfp865        | INSIDE                 | 1.047                                                        | 2.175                          | 704.58             | 1532.78            | 2.278                          | 649.15             | 1478.81            |
| A_68_P26948855 | chr10:12780660-12780705                           | FJ425893:373       |               | INSIDE                 | 1.047                                                        | 1.874                          | 860.53             | 1613.05            | 1.962                          | 740.60             | 1453.24            |
| A_68_P23327635 | chr4:134828183-134828227                          | NM_013885:471      | Clic4         | INSIDE                 | 1.046                                                        | 2.012                          | 680.57             | 1369.61            | 2.105                          | 665.49             | 1401.01            |
| A_68_P27289088 | chr10:80820220-80820264                           | NM_028657:-72      | F630110N24Rik | DIVERGENT_PROMOTER     | 1.046                                                        | 1.901                          | 475.19             | 903.48             | 1.988                          | 471.41             | 937.16             |
| A_68_P31159262 | chr17:35607004-35607048                           | NM_010391:-7       | H2-Q10        | PROMOTER               | 1.046                                                        | 2.079                          | 1028.06            | 2137.54            | 2.175                          | 924.66             | 2010.83            |
| A_68_P20799111 | chr1:168168733-168168779                          | NM_175296:119      | Mael          | INSIDE                 | 1.046                                                        | 2.369                          | 332.64             | 788.10             | 2.478                          | 283.30             | 702.14             |
| A_68_P30346618 | chr15:76012196-76012240                           | NM_201394:13922    | Plec          | INSIDE                 | 1.046                                                        | 1.801                          | 369.10             | 664.84             | 1.883                          | 368.36             | 693.77             |
| A_68_P22825897 | chr4:33334510-33334554                            | NM_001033225:1230  | Pnrc1         | INSIDE                 | 1.046                                                        | 0.642                          | 1333.43            | 856.62             | 0.672                          | 1142.52            | 767.72             |
| A_68_P26167600 | chr8:113824005-113824049                          | NM_146218:96       | Rfwd3         | INSIDE                 | 1.046                                                        | 0.555                          | 3761.29            | 2086.67            | 0.580                          | 3013.35            | 1747.97            |
| A_68_P32562269 | chrX:98255087-98255141                            | NM_031384:-136     | Tex11         | PROMOTER               | 1.046                                                        | 2.096                          | 1224.91            | 2567.23            | 2.193                          | 466.72             | 1023.46            |
| A_68_P24428350 | chr6:48570111-48570155                            | NM_173429:6954     | Zfp775        | INSIDE                 | 1.046                                                        | 2.360                          | 1162.00            | 2742.71            | 2.468                          | 971.23             | 2397.32            |
| A_68_P28183976 | chr11:120211624-120211668                         | NR_038126:1655     | O610009L18Rik | INSIDE                 | 1.045                                                        | 2.195                          | 665.37             | 1460.41            | 2.295                          | 601.76             | 1380.79            |
| A_68_P21068909 | chr2:24790606-24790650                            | NM_001162485:173   | Arrdc1        | INSIDE                 | 1.045                                                        | 0.467                          | 1546.09            | 722.38             | 0.488                          | 1310.47            | 639.65             |
| A_68_P29613381 | chr14:55251101-55251145                           | NM_199470:9079     | Cdh24         | INSIDE                 | 1.045                                                        | 2.153                          | 1071.20            | 2306.36            | 2.249                          | 952.55             | 2142.57            |
| A_68_P27954535 | chr11:80290099-80290143                           | NM_009871:-427     | Cdk5r1        | PROMOTER               | 1.045                                                        | 1.772                          | 957.36             | 1696.41            | 1.852                          | 825.51             | 1529.14            |

| ProbeName      | Target position of probe on CpG island microarray | TargetID                 | GeneSymbol    | CpG island Description | Ratio of relative methylation (TiO <sub>2</sub> -NP/Vehicle) | Sham group                     |                    |                    | TiO <sub>2</sub> -H group      |                    |                    |
|----------------|---------------------------------------------------|--------------------------|---------------|------------------------|--------------------------------------------------------------|--------------------------------|--------------------|--------------------|--------------------------------|--------------------|--------------------|
|                |                                                   |                          |               |                        |                                                              | Relative methylation (Cy5/Cy3) | Cy3 signal (Input) | Cy5 signal (MeDIP) | Relative methylation (Cy5/Cy3) | Cy3 signal (Input) | Cy5 signal (MeDIP) |
| A_68_P26504860 | chr9:50467402-50467446                            | NM_145614:461            | Dlat          | INSIDE                 | 1.045                                                        | 0.604                          | 1224.75            | 740.09             | 0.632                          | 1142.35            | 721.57             |
| A_68_P30512416 | chr16:4879609-4879653                             | NM_145359:221            | Fam100a       | INSIDE                 | 1.045                                                        | 0.613                          | 1038.60            | 636.17             | 0.640                          | 901.87             | 577.51             |
| A_68_P24112572 | chr5:134790667-134790711                          | NM_001080746:-72         | Gtf2i         | PROMOTER               | 1.045                                                        | 2.524                          | 1564.41            | 3949.03            | 2.638                          | 1374.38            | 3625.59            |
| A_68_P26021243 | chr8:87225571-87225617                            | NM_008535:239            | Lyl1          | INSIDE                 | 1.045                                                        | 1.688                          | 1632.11            | 2755.34            | 1.764                          | 1303.98            | 2300.28            |
| A_68_P31556967 | chr18:23962508-23962552                           | NM_153058:60             | Mapre2        | INSIDE                 | 1.045                                                        | 1.384                          | 2864.47            | 3964.89            | 1.447                          | 2179.63            | 3153.12            |
| A_68_P27855154 | chr11:62478652-62478704                           | NM_175002:16513          | Mmgt2         | INSIDE                 | 1.045                                                        | 1.836                          | 365.93             | 671.76             | 1.919                          | 332.43             | 637.78             |
| A_68_P29314989 | chr13:109906595-109906639                         | NM_011056:462246         | Pde4d         | INSIDE                 | 1.045                                                        | 0.634                          | 1460.52            | 925.84             | 0.662                          | 1194.99            | 791.55             |
| A_68_P26350663 | chr9:21961255-21961299                            | NM_001082532:-13         | Pigyl         | PROMOTER               | 1.045                                                        | 3.047                          | 1304.98            | 3976.91            | 3.184                          | 1021.61            | 3252.37            |
| A_68_P21749132 | chr2:152224537-152224581                          | NM_011438:-776           | Sox12         | PROMOTER               | 1.045                                                        | 2.310                          | 611.12             | 1411.45            | 2.413                          | 577.78             | 1393.90            |
| A_68_P25030459 | chr7:31016969-31017013                            | NM_025548:58             | Tbc1          | INSIDE                 | 1.045                                                        | 0.482                          | 1388.93            | 669.17             | 0.504                          | 1198.39            | 603.56             |
| A_68_P27644762 | chr11:23155768-23155812                           | NM_001035226:-250        | Xpo1          | PROMOTER               | 1.045                                                        | 0.679                          | 2353.67            | 1597.27            | 0.709                          | 1775.56            | 1258.75            |
| A_68_P28751777 | chr12:113917151-113917195                         | NM_001100460:122         | Zbtb42        | INSIDE                 | 1.045                                                        | 2.009                          | 869.55             | 1746.68            | 2.099                          | 848.73             | 1781.51            |
| A_68_P24596107 | chr6:83864866-83864910                            | NM_001166371:542         | Zfml          | INSIDE                 | 1.045                                                        | 1.530                          | 722.16             | 1104.90            | 1.598                          | 583.64             | 932.73             |
| A_68_P26038359 | chr8:90483614-90483658                            | NM_033327:-142           | Zfp423        | PROMOTER               | 1.045                                                        | 1.373                          | 1466.81            | 2014.03            | 1.435                          | 1255.04            | 1801.28            |
| A_68_P26235083 | A_68_P26235083                                    |                          |               | Unknown                | 1.045                                                        | 2.431                          | 553.02             | 1344.46            | 2.541                          | 473.46             | 1202.92            |
| A_68_P23334942 | chr4:136193562-136193606                          | ENSMUST00000146123:15078 |               | INSIDE                 | 1.045                                                        | 0.585                          | 1122.30            | 656.00             | 0.611                          | 1046.54            | 639.31             |
| A_68_P21969036 | chr3:17955303-17955347                            | NM_021560:1000           | Bhlhe22       | INSIDE                 | 1.044                                                        | 1.685                          | 837.92             | 1412.20            | 1.760                          | 807.05             | 1420.08            |
| A_68_P26135495 | chr8:108228498-108228542                          | NM_198299:3548           | E130303B06Rik | INSIDE                 | 1.044                                                        | 3.241                          | 897.85             | 2910.09            | 3.385                          | 658.64             | 2229.34            |
| A_68_P24993062 | chr7:19979665-19979709                            | NM_007949:12299          | Ercc2         | INSIDE                 | 1.044                                                        | 2.893                          | 276.61             | 800.13             | 3.019                          | 227.67             | 687.30             |
| A_68_P23416734 | chr4:151506423-151506467                          | NM_019585:-3410          | Espn          | PROMOTER               | 1.044                                                        | 1.554                          | 1907.23            | 2964.13            | 1.622                          | 1427.44            | 2315.43            |
| A_68_P24046863 | chr5:122299245-122299289                          | NM_175474:230            | Fam109a       | INSIDE                 | 1.044                                                        | 1.865                          | 1301.20            | 2427.36            | 1.948                          | 1093.39            | 2129.73            |
| A_68_P25531564 | chr7:139158932-139158976                          | NM_173410:812            | Gpr26         | INSIDE                 | 1.044                                                        | 0.575                          | 1305.07            | 749.95             | 0.600                          | 1046.30            | 627.96             |
| A_68_P28605005 | chr12:86939999-86940043                           | NM_001205052:-34         | Jdp2          | PROMOTER               | 1.044                                                        | 1.828                          | 1103.33            | 2017.21            | 1.909                          | 1020.13            | 1947.39            |
| A_68_P26022553 | chr8:87426545-87426589                            | NM_010635:740            | Klf1          | INSIDE                 | 1.044                                                        | 1.392                          | 1297.55            | 1806.29            | 1.454                          | 1080.75            | 1571.32            |
| A_68_P30148787 | chr15:38229176-38229220                           | NM_013692:1264           | Klfl10        | INSIDE                 | 1.044                                                        | 2.644                          | 386.74             | 1022.47            | 2.761                          | 400.73             | 1106.49            |
| A_68_P25951938 | chr8:72976513-72976557                            | NM_001122830:24308       | Klhl26        | INSIDE                 | 1.044                                                        | 2.053                          | 551.03             | 1131.07            | 2.142                          | 496.89             | 1064.42            |
| A_68_P29269304 | chr13:101386895-101386939                         | NM_178410:-17            | Marveld2      | PROMOTER               | 1.044                                                        | 1.795                          | 1108.65            | 1990.45            | 1.874                          | 1096.50            | 2054.39            |
| A_68_P30083234 | chr15:25710990-25711034                           | NM_019472:158708         | Myo10         | INSIDE                 | 1.044                                                        | 3.394                          | 281.59             | 955.84             | 3.545                          | 230.09             | 815.76             |
| A_68_P30480087 | chr15:99256378-99256422                           | NM_001001884:31779       | Nekap5l       | INSIDE                 | 1.044                                                        | 2.160                          | 708.07             | 1529.56            | 2.255                          | 586.30             | 1322.29            |
| A_68_P23544555 | chr5:24414575-24414619                            | NM_001170555:-269        | Prkag2        | PROMOTER               | 1.044                                                        | 2.782                          | 288.31             | 802.23             | 2.906                          | 255.47             | 742.26             |
| A_68_P25094157 | chr7:52887692-52887738                            | NM_028544:4808           | Rasip1        | INSIDE                 | 1.044                                                        | 1.716                          | 1975.86            | 3390.32            | 1.792                          | 1625.60            | 2913.17            |
| A_68_P27833618 | chr11:58752100-58752144                           | NM_022423:286            | Rnf187        | INSIDE                 | 1.044                                                        | 1.443                          | 944.71             | 1363.65            | 1.507                          | 868.54             | 1309.22            |
| A_68_P27798413 | chr11:52096958-52097002                           | NM_009331:-1228          | Tcf7          | PROMOTER               | 1.044                                                        | 0.571                          | 928.18             | 529.67             | 0.596                          | 864.90             | 515.51             |
| A_68_P26845368 | chr9:114471438-114471482                          | NM_001042503:2027        | Trim71        | INSIDE                 | 1.044                                                        | 2.685                          | 604.08             | 1621.88            | 2.804                          | 480.27             | 1346.57            |
| A_68_P22970877 | chr4:63156474-63156518                            | NM_001008791:489         | Whrn          | INSIDE                 | 1.044                                                        | 1.760                          | 3493.85            | 6149.62            | 1.837                          | 2795.05            | 5134.03            |
| A_68_P20859687 | chr1:179372004-179372048                          | NM_001012330:-2765       | Zfp238        | PROMOTER               | 1.044                                                        | 0.546                          | 1085.20            | 592.60             | 0.570                          | 902.20             | 514.48             |
| A_68_P32634536 | chrX:120217471-120217515                          | NM_028426:325            | 3110007F17Rik | INSIDE                 | 1.043                                                        | 1.383                          | 4445.64            | 6147.00            | 1.442                          | 2163.02            | 3119.10            |
| A_68_P24800466 | chr6:120772672-120772716                          | NM_007510:9              | Atp6v1e1      | INSIDE                 | 1.043                                                        | 1.400                          | 1144.93            | 1602.54            | 1.460                          | 1022.63            | 1493.49            |
| A_68_P24863574 | chr6:134742286-134742330                          | NM_001048054:338         | Dusp16        | INSIDE                 | 1.043                                                        | 1.876                          | 587.19             | 1101.66            | 1.958                          | 575.64             | 1126.84            |
| A_68_P25564250 | chr7:144390350-144390394                          | NM_001113414:115756      | Ebf3          | INSIDE                 | 1.043                                                        | 4.902                          | 2181.37            | 10692.79           | 5.111                          | 1666.03            | 8514.54            |
| A_68_P22569283 | chr3:138189837-138189881                          | NM_007917:704            | Eif4e         | INSIDE                 | 1.043                                                        | 2.081                          | 415.97             | 865.56             | 2.170                          | 383.89             | 832.98             |
| A_68_P24466826 | chr6:54988021-54988065                            | NM_180678:48             | Gars          | INSIDE                 | 1.043                                                        | 2.327                          | 1113.92            | 2592.41            | 2.426                          | 1037.95            | 2518.29            |
| A_68_P24448669 | chr6:52108855-52108899                            | NM_010449:-560           | Hoxa1         | PROMOTER               | 1.043                                                        | 0.342                          | 1799.12            | 614.87             | 0.357                          | 1544.28            | 550.61             |
| A_68_P23756016 | chr5:65770881-65770930                            | NM_031180:31256          | Klb           | INSIDE                 | 1.043                                                        | 2.516                          | 232.44             | 584.88             | 2.624                          | 208.75             | 547.83             |
| A_68_P26537261 | chr9:56467792-56467836                            | NM_181074:65246          | Lingo1        | INSIDE                 | 1.043                                                        | 1.712                          | 2456.36            | 4205.16            | 1.786                          | 1592.78            | 2844.00            |
| A_68_P27542074 | chr10:128002848-128002892                         | NM_011119:120            | Pa2g4         | INSIDE                 | 1.043                                                        | 0.572                          | 1497.55            | 856.73             | 0.597                          | 1231.77            | 735.32             |
| A_68_P31629586 | chr18:37881660-37881706                           | NM_033591:-3677          | Pcdhga8       | PROMOTER               | 1.043                                                        | 1.839                          | 491.62             | 903.97             | 1.917                          | 419.24             | 803.83             |
| A_68_P26293554 | chr9:8901675-8901719                              | NM_008829:1864           | Pgr           | INSIDE                 | 1.043                                                        | 2.294                          | 779.59             | 1788.72            | 2.392                          | 749.73             | 1793.51            |
| A_68_P25972608 | chr8:77736812-77736856                            | NM_029182:-1008          | Rasd2         | PROMOTER               | 1.043                                                        | 0.641                          | 3512.42            | 2251.36            | 0.668                          | 2725.01            | 1821.52            |
| A_68_P33007022 | A_68_P33007022                                    |                          |               | Unknown                | 1.043                                                        | 2.062                          | 31059.58           | 64030.31           | 2.150                          | 25863.33           | 55609.81           |
| A_68_P24127513 | chr5:138220985-138221029                          | NM_027242:861            | 2010007H12Rik | INSIDE                 | 1.042                                                        | 1.733                          | 1168.45            | 2025.09            | 1.807                          | 928.40             | 1677.37            |

| ProbeName      | Target position of probe on CpG island microarray | TargetID           | GeneSymbol    | CpG island Description | Ratio of relative methylation (TiO <sub>2</sub> -NP/Vehicle) | Sham group                     |                    |                    | TiO <sub>2</sub> -H group      |                    |                    |
|----------------|---------------------------------------------------|--------------------|---------------|------------------------|--------------------------------------------------------------|--------------------------------|--------------------|--------------------|--------------------------------|--------------------|--------------------|
|                |                                                   |                    |               |                        |                                                              | Relative methylation (Cy5/Cy3) | Cy3 signal (Input) | Cy5 signal (MeDIP) | Relative methylation (Cy5/Cy3) | Cy3 signal (Input) | Cy5 signal (MeDIP) |
| A_68_P30778637 | chr16:55974341-55974385                           | NR_027965:368      | 2310061J03Rik | INSIDE                 | 1.042                                                        | 1.663                          | 1118.02            | 1859.62            | 1.733                          | 996.69             | 1727.51            |
| A_68_P22142064 | chr3:53282739-53282783                            | NM_173382:15022    | 2810046L04Rik | INSIDE                 | 1.042                                                        | 3.519                          | 5006.99            | 17618.96           | 3.666                          | 3465.81            | 12705.92           |
| A_68_P32233088 | chrX:5660010-5660054                              | NM_001033211:506   | AU022751      | INSIDE                 | 1.042                                                        | 1.522                          | 3159.39            | 4809.60            | 1.586                          | 1454.19            | 2305.82            |
| A_68_P21067991 | chr2:24618118-24618162                            | NM_001042528:427   | Caena1b       | INSIDE                 | 1.042                                                        | 1.615                          | 2750.23            | 4441.73            | 1.683                          | 2350.54            | 3955.88            |
| A_68_P31921836 | chr19:4214356-4214400                             | NM_019952:-13      | Clef1         | PROMOTER               | 1.042                                                        | 1.836                          | 1029.34            | 1890.17            | 1.913                          | 958.78             | 1834.13            |
| A_68_P33015620 | chr1_random:50449-50497                           | NM_026866:134866   | Disp1         | INSIDE                 | 1.042                                                        | 2.771                          | 442.48             | 1226.17            | 2.889                          | 347.14             | 1002.75            |
| A_68_P23392782 | chr4:147538404-147538448                          | NM_176848:3650     | Fbxo2         | INSIDE                 | 1.042                                                        | 1.866                          | 871.05             | 1625.16            | 1.944                          | 765.16             | 1487.79            |
| A_68_P22448209 | chr3:115954867-115954911                          | NM_022427:1514     | Gpr88         | INSIDE                 | 1.042                                                        | 2.531                          | 539.14             | 1364.84            | 2.639                          | 501.70             | 1323.88            |
| A_68_P22210129 | chr3:67267888-67267932                            | NM_016753:-81      | Lxn           | PROMOTER               | 1.042                                                        | 1.515                          | 927.53             | 1404.92            | 1.578                          | 734.14             | 1158.50            |
| A_68_P30000056 | chr15:8395496-8395540                             | NM_027707:-1055    | Nipbl         | PROMOTER               | 1.042                                                        | 1.520                          | 857.10             | 1303.04            | 1.584                          | 834.71             | 1321.84            |
| A_68_P25092986 | chr7:52670982-52671026                            | NM_198190:1940     | Ntf5          | INSIDE                 | 1.042                                                        | 2.173                          | 407.44             | 885.24             | 2.265                          | 367.05             | 831.33             |
| A_68_P25499770 | chr7:133436200-133436244                          | NM_145587:20090    | Sbk1          | INSIDE                 | 1.042                                                        | 2.112                          | 1006.85            | 2126.92            | 2.201                          | 796.38             | 1753.09            |
| A_68_P26142247 | chr8:109459545-109459589                          | NM_009229:-83      | Sntb2         | PROMOTER               | 1.042                                                        | 2.493                          | 736.32             | 1835.98            | 2.599                          | 644.29             | 1674.54            |
| A_68_P24163027 | chr5:145612055-145612099                          | NM_001081362:82416 | Trrap         | INSIDE                 | 1.042                                                        | 1.919                          | 830.14             | 1592.73            | 1.998                          | 577.01             | 1153.12            |
| A_68_P29097416 | chr13:64254085-64254129                           | NM_175494:401      | Zfp367        | INSIDE                 | 1.042                                                        | 3.502                          | 925.04             | 3239.57            | 3.648                          | 847.03             | 3089.96            |
| A_68_P23299680 | chr4:129684126-129684170                          | NM_001199696:21827 | Bai2          | INSIDE                 | 1.041                                                        | 2.939                          | 565.69             | 1662.69            | 3.059                          | 499.91             | 1529.35            |
| A_68_P21646221 | chr2:133378682-133378726                          | NM_007553:-230     | Bmp2          | PROMOTER               | 1.041                                                        | 2.647                          | 1696.40            | 4490.61            | 2.755                          | 1388.78            | 3825.80            |
| A_68_P23351275 | chr4:138908526-138908570                          | NM_001039200:41    | C230096C10Rik | INSIDE                 | 1.041                                                        | 1.718                          | 2977.06            | 5115.51            | 1.789                          | 2277.70            | 4075.38            |
| A_68_P24631550 | chr6:90259089-90259133                            | NM_027928:16069    | Chst13        | INSIDE                 | 1.041                                                        | 1.923                          | 930.71             | 1790.20            | 2.002                          | 772.41             | 1546.42            |
| A_68_P22305775 | chr3:86723959-86724003                            | NM_001195496:826   | Delk2         | INSIDE                 | 1.041                                                        | 1.575                          | 1090.96            | 1718.79            | 1.640                          | 975.17             | 1599.18            |
| A_68_P23280649 | chr4:126210358-126210402                          | NM_153177:322      | Eif2c4        | INSIDE                 | 1.041                                                        | 2.923                          | 1288.88            | 3767.39            | 3.042                          | 1349.21            | 4104.17            |
| A_68_P28563526 | chr12:79327709-79327753                           | NM_145965:89       | Gphn          | INSIDE                 | 1.041                                                        | 1.667                          | 692.64             | 1154.90            | 1.736                          | 666.40             | 1156.92            |
| A_68_P21834173 | chr2:167013977-167014021                          | NM_008420:301      | Kenb1         | INSIDE                 | 1.041                                                        | 2.569                          | 1455.04            | 3738.70            | 2.676                          | 1336.33            | 3575.85            |
| A_68_P25951931 | chr8:72975757-72975801                            | NM_001122830:25064 | Klhl26        | INSIDE                 | 1.041                                                        | 2.492                          | 367.21             | 915.26             | 2.596                          | 336.42             | 873.19             |
| A_68_P31130476 | chr17:30026783-30026828                           | NM_001081160:-1978 | Mdga1         | PROMOTER               | 1.041                                                        | 1.819                          | 668.52             | 1215.82            | 1.893                          | 543.92             | 1029.49            |
| A_68_P26017636 | chr8:86536527-86536571                            | NR_035431:-1016    | Mir1199       | DIVERGENT_PROMOTER     | 1.041                                                        | 0.572                          | 1480.52            | 846.54             | 0.595                          | 1269.41            | 755.29             |
| A_68_P26164570 | chr8:113262638-113262682                          | NM_198625:17277    | Mtss1l        | INSIDE                 | 1.041                                                        | 1.891                          | 354.50             | 670.49             | 1.968                          | 342.76             | 674.59             |
| A_68_P20474868 | chr1:99991929-99991973                            | NM_013626:259      | Pam           | INSIDE                 | 1.041                                                        | 0.520                          | 2382.96            | 1240.10            | 0.542                          | 2136.84            | 1157.41            |
| A_68_P26504618 | chr9:50425465-50425510                            | NM_028300:62       | Pih1d2        | INSIDE                 | 1.041                                                        | 1.732                          | 855.79             | 1482.45            | 1.804                          | 815.32             | 1470.88            |
| A_68_P26823384 | chr9:110283423-110283467                          | NM_001001144:47648 | Scap          | INSIDE                 | 1.041                                                        | 2.276                          | 508.24             | 1156.95            | 2.369                          | 440.12             | 1042.78            |
| A_68_P22218623 | chr3:68808767-68808811                            | NM_133786:-105     | Sme4          | DIVERGENT_PROMOTER     | 1.041                                                        | 1.704                          | 932.28             | 1588.71            | 1.774                          | 863.15             | 1531.25            |
| A_68_P22336393 | chr3:93247754-93247798                            | NM_001163098:1525  | Tehh          | INSIDE                 | 1.041                                                        | 1.830                          | 872.91             | 1597.72            | 1.905                          | 701.58             | 1336.32            |
| A_68_P25011333 | chr7:26472908-26472952                            | NM_011577:910      | Tgfb1         | INSIDE                 | 1.041                                                        | 1.606                          | 653.23             | 1049.15            | 1.671                          | 561.79             | 938.88             |
| A_68_P29880578 | chr14:106505252-106505296                         | NM_198601:-140     | Trim52        | PROMOTER               | 1.041                                                        | 2.026                          | 319.67             | 647.56             | 2.108                          | 265.76             | 560.32             |
| A_68_P24124211 | chr5:137505950-137505994                          | NM_001039385:-192  | Vgf           | PROMOTER               | 1.041                                                        | 1.723                          | 843.90             | 1454.12            | 1.794                          | 762.20             | 1367.58            |
| A_68_P31092444 | chr17:23713564-23713608                           | NM_011747:22868    | Zfp13         | INSIDE                 | 1.041                                                        | 2.787                          | 934.23             | 2603.98            | 2.903                          | 790.19             | 2293.70            |
| A_68_P24065807 | chr5:125726086-125726130                          |                    |               | Unknown                | 1.041                                                        | 0.418                          | 1395.60            | 583.26             | 0.435                          | 1041.88            | 453.23             |
| A_68_P31149281 | chr17:33661172-33661216                           | NM_172619:54       | Adams10       | INSIDE                 | 1.040                                                        | 0.619                          | 1420.75            | 880.04             | 0.644                          | 1104.84            | 711.93             |
| A_68_P26023161 | chr8:87535204-87535248                            | NM_001130193:3004  | Best2         | INSIDE                 | 1.040                                                        | 1.483                          | 1355.93            | 2011.05            | 1.542                          | 1274.61            | 1965.91            |
| A_68_P32268345 | chrX:13423285-13423329                            | NM_009806:361      | Cask          | INSIDE                 | 1.040                                                        | 2.319                          | 513.28             | 1190.17            | 2.412                          | 330.41             | 796.96             |
| A_68_P23336932 | chr4:136501941-136501985                          | NM_007939:10769    | Epha8         | INSIDE                 | 1.040                                                        | 2.435                          | 1675.12            | 4078.45            | 2.532                          | 1277.19            | 3233.46            |
| A_68_P30720006 | chr16:44173216-44173260                           | NM_001029889:-271  | Gm608         | PROMOTER               | 1.040                                                        | 1.359                          | 2434.22            | 3307.92            | 1.414                          | 1899.95            | 2685.64            |
| A_68_P28748382 | chr12:113412288-113412332                         | NM_001097621:27892 | Kif26a        | INSIDE                 | 1.040                                                        | 2.659                          | 685.56             | 1822.57            | 2.766                          | 590.06             | 1632.09            |
| A_68_P24378364 | chr6:38586770-38586814                            | NM_001033171:447   | Klrg2         | INSIDE                 | 1.040                                                        | 2.189                          | 1205.08            | 2637.46            | 2.276                          | 1086.49            | 2472.73            |
| A_68_P22210124 | chr3:67267480-67267524                            | NM_016753:327      | Lxn           | INSIDE                 | 1.040                                                        | 0.625                          | 1803.38            | 1127.06            | 0.650                          | 1374.83            | 893.78             |
| A_68_P27279099 | chr10:79281830-79281874                           | NM_001161747:25536 | Palm          | INSIDE                 | 1.040                                                        | 2.752                          | 274.85             | 756.34             | 2.862                          | 195.87             | 560.53             |
| A_68_P30346634 | chr15:76014247-76014291                           | NM_201394:11872    | Plec          | INSIDE                 | 1.040                                                        | 2.761                          | 1003.49            | 2770.64            | 2.873                          | 761.57             | 2187.78            |
| A_68_P21417953 | chr2:90419832-90419876                            | NM_008982:950      | Ptpnj         | INSIDE                 | 1.040                                                        | 1.979                          | 1396.89            | 2764.15            | 2.057                          | 1241.18            | 2553.45            |
| A_68_P29675226 | chr14:66349915-66349959                           | NM_001168318:64697 | Scara5        | INSIDE                 | 1.040                                                        | 1.882                          | 563.51             | 1060.26            | 1.956                          | 485.53             | 949.92             |
| A_68_P32168795 | chr19:50753385-50753429                           | NM_021377:-304     | Sores1        | PROMOTER               | 1.040                                                        | 1.427                          | 1397.99            | 1994.69            | 1.484                          | 1288.34            | 1912.38            |
| A_68_P31513732 | chr18:14840635-14840679                           | NM_001161369:767   | Ss18          | INSIDE                 | 1.040                                                        | 1.438                          | 1617.10            | 2325.69            | 1.496                          | 1518.86            | 2272.81            |

| ProbeName      | Target position of probe on CpG island microarray | TargetID              | GeneSymbol    | CpG island Description | Ratio of relative methylation (TiO <sub>2</sub> -NP/Vehicle) | Sham group                     |                    |                    | TiO <sub>2</sub> -H group      |                    |                    |
|----------------|---------------------------------------------------|-----------------------|---------------|------------------------|--------------------------------------------------------------|--------------------------------|--------------------|--------------------|--------------------------------|--------------------|--------------------|
|                |                                                   |                       |               |                        |                                                              | Relative methylation (Cy5/Cy3) | Cy3 signal (Input) | Cy5 signal (MeDIP) | Relative methylation (Cy5/Cy3) | Cy3 signal (Input) | Cy5 signal (MeDIP) |
| A_68_P21612437 | chr2:127095568-127095612                          | NM_139308:374         | Stard7        | PROMOTER               | 1.040                                                        | 1.435                          | 1214.92            | 1742.80            | 1.492                          | 1099.80            | 1640.49            |
| A_68_P25614230 | chr8:3496425-3496469                              | NM_080461:3309        | Zfp358        | INSIDE                 | 1.040                                                        | 2.652                          | 2418.50            | 6414.67            | 2.757                          | 1936.61            | 5340.06            |
| A_68_P22630570 | chr3:148652214-148652258                          | ENSMUST00000098518:44 |               | INSIDE                 | 1.040                                                        | 1.400                          | 2742.44            | 3840.44            | 1.456                          | 2214.13            | 3223.95            |
| A_68_P20936908 | chr1:193048383-193048427                          | ENSMUST00000139056:52 |               | INSIDE                 | 1.040                                                        | 1.412                          | 996.51             | 1406.78            | 1.469                          | 864.50             | 1269.72            |
| A_68_P20456909 | chr1:95582007-95582051                            | NM_016778:-242        | Bok           | PROMOTER               | 1.039                                                        | 1.853                          | 1276.27            | 2365.49            | 1.926                          | 1214.63            | 2339.16            |
| A_68_P23818508 | chr5:77287446-77287490                            | NM_001163793:17845    | C530008M17Rik | INSIDE                 | 1.039                                                        | 1.758                          | 869.28             | 1528.10            | 1.826                          | 659.57             | 1204.48            |
| A_68_P23440734 | chr4:155186580-155186624                          | NM_207678:5           | Cen2          | INSIDE                 | 1.039                                                        | 0.435                          | 2062.61            | 896.78             | 0.452                          | 1736.83            | 784.33             |
| A_68_P26843397 | chr9:113935916-113935960                          | NM_178624:-69         | Fbxl2         | PROMOTER               | 1.039                                                        | 0.578                          | 1245.84            | 720.25             | 0.601                          | 1178.26            | 707.58             |
| A_68_P20553868 | chr1:120734527-120734571                          | NM_001081125:215648   | Gli2          | INSIDE                 | 1.039                                                        | 2.093                          | 1221.98            | 2557.06            | 2.173                          | 847.19             | 1841.31            |
| A_68_P23438947 | chr4:154866365-154866409                          | NM_001160016:917      | Gnb1          | INSIDE                 | 1.039                                                        | 0.439                          | 2353.45            | 1032.60            | 0.456                          | 1960.08            | 893.17             |
| A_68_P26867068 | chr9:118468753-118468797                          | NM_018748:53339       | Golga4        | INSIDE                 | 1.039                                                        | 2.785                          | 1156.63            | 3221.46            | 2.893                          | 928.84             | 2687.11            |
| A_68_P25525510 | chr7:138079636-138079680                          | NM_019564:-58         | Htra1         | PROMOTER               | 1.039                                                        | 1.463                          | 1067.31            | 1561.54            | 1.520                          | 886.73             | 1348.05            |
| A_68_P32029536 | chr19:25484468-25484512                           | NM_181404:172799      | Kank1         | INSIDE                 | 1.039                                                        | 2.607                          | 1038.04            | 2706.33            | 2.709                          | 826.18             | 2238.26            |
| A_68_P25018409 | chr7:28443259-28443303                            | NM_001081292:16337    | Map3k10       | INSIDE                 | 1.039                                                        | 1.733                          | 2167.04            | 3754.61            | 1.800                          | 1817.53            | 3271.69            |
| A_68_P25954142 | chr8:73321226-73321270                            | NM_199308:-4916       | Mast3         | PROMOTER               | 1.039                                                        | 2.706                          | 4368.49            | 11819.08           | 2.811                          | 2760.84            | 7760.00            |
| A_68_P22039667 | chr3:32635840-32635884                            | NM_025316:-122        | Ndufb5        | DIVERGENT_PROMOTER     | 1.039                                                        | 1.470                          | 1598.16            | 2348.95            | 1.527                          | 1266.94            | 1934.85            |
| A_68_P27261658 | chr10:75837803-75837847                           | NM_008787:67833       | Pent          | INSIDE                 | 1.039                                                        | 5.183                          | 127.46             | 660.66             | 5.388                          | 126.38             | 680.94             |
| A_68_P27362365 | chr10:94407441-94407485                           | NM_018797:-250        | Plxnc1        | PROMOTER               | 1.039                                                        | 1.774                          | 567.67             | 1007.33            | 1.844                          | 450.72             | 831.11             |
| A_68_P20598630 | chr1:130000293-130000337                          | NM_181750:432         | R3hdm1        | INSIDE                 | 1.039                                                        | 3.943                          | 390.35             | 1538.97            | 4.098                          | 433.83             | 1777.67            |
| A_68_P21747682 | chr2:151931567-151931611                          | NM_029688:123         | Srxn1         | INSIDE                 | 1.039                                                        | 0.441                          | 2156.03            | 950.82             | 0.458                          | 1629.59            | 746.88             |
| A_68_P29734164 | chr14:76904319-76904363                           | NM_009366:24          | Tsc22d1       | INSIDE                 | 1.039                                                        | 1.787                          | 470.76             | 841.10             | 1.857                          | 446.09             | 828.18             |
| A_68_P23185482 | chr4:106295106-106295150                          | NM_177667:75          | Tie2          | INSIDE                 | 1.039                                                        | 3.272                          | 1376.86            | 4504.94            | 3.399                          | 1162.89            | 3953.08            |
| A_68_P28160202 | chr11:116442703-116442747                         | NM_173755:37          | Ube2o         | INSIDE                 | 1.039                                                        | 2.036                          | 1996.47            | 4063.88            | 2.114                          | 1789.66            | 3784.15            |
| A_68_P30571779 | chr16:17070377-17070421                           | NM_023249:-5          | Ypel1         | PROMOTER               | 1.039                                                        | 3.962                          | 934.43             | 3702.52            | 4.115                          | 866.05             | 3564.00            |
| A_68_P28939815 | chr13:34744074-34744118                           | NM_025831:454         | 130001406Rik  | INSIDE                 | 1.038                                                        | 0.626                          | 1166.07            | 730.49             | 0.650                          | 995.92             | 647.60             |
| A_68_P28420020 | chr12:50492378-50492422                           | NR_026733:1762        | 3110039M20Rik | INSIDE                 | 1.038                                                        | 1.364                          | 1668.80            | 2275.82            | 1.415                          | 1462.19            | 2068.92            |
| A_68_P28198915 | chr12:4133424-4133468                             | NM_138305:-706        | Adecy3        | PROMOTER               | 1.038                                                        | 1.655                          | 1073.26            | 1776.42            | 1.719                          | 945.52             | 1625.09            |
| A_68_P25415075 | chr7:117912319-117912363                          | NM_009667:-3777       | Ampd3         | PROMOTER               | 1.038                                                        | 3.083                          | 473.86             | 1460.75            | 3.201                          | 423.67             | 1356.15            |
| A_68_P25537314 | chr7:140051211-140051255                          | NM_198017:325         | Fam175b       | INSIDE                 | 1.038                                                        | 1.511                          | 726.58             | 1097.76            | 1.569                          | 590.46             | 926.24             |
| A_68_P27284855 | chr10:80154115-80154159                           | NM_172457:10429       | Mobkl2a       | INSIDE                 | 1.038                                                        | 1.781                          | 498.65             | 888.18             | 1.848                          | 439.66             | 812.52             |
| A_68_P20377655 | chr1:79772877-79772921                            | NM_001081210:306      | Mrp144        | INSIDE                 | 1.038                                                        | 2.123                          | 914.60             | 1941.32            | 2.204                          | 839.76             | 1850.73            |
| A_68_P23260198 | chr4:122673656-122673700                          | NM_008506:337         | Myc1          | INSIDE                 | 1.038                                                        | 2.448                          | 1007.83            | 2466.73            | 2.540                          | 904.36             | 2296.66            |
| A_68_P28178596 | chr11:119410661-119410705                         | NM_008730:-1548       | Nptx1         | PROMOTER               | 1.038                                                        | 1.426                          | 839.25             | 1196.76            | 1.481                          | 745.33             | 1103.61            |
| A_68_P26742500 | chr9:95460884-95460928                            | NM_198414:671         | Paqr9         | INSIDE                 | 1.038                                                        | 2.436                          | 1252.77            | 3052.29            | 2.529                          | 1258.48            | 3182.23            |
| A_68_P27278598 | chr10:79198902-79198960                           | NM_172551:10396       | Polrmt        | INSIDE                 | 1.038                                                        | 3.322                          | 984.85             | 3272.10            | 3.450                          | 777.88             | 2683.31            |
| A_68_P23649335 | chr5:44492359-44492403                            | NM_001163584:-6373    | Prom1         | PROMOTER               | 1.038                                                        | 1.951                          | 3737.68            | 7292.88            | 2.025                          | 2978.63            | 6031.96            |
| A_68_P27287274 | chr10:80542595-80542639                           | NM_022653:9789        | Thop1         | INSIDE                 | 1.038                                                        | 4.436                          | 1488.23            | 6602.37            | 4.604                          | 1068.13            | 4917.69            |
| A_68_P23340750 | chr4:137150373-137150417                          | NM_130879:291         | Usp48         | INSIDE                 | 1.038                                                        | 0.464                          | 2020.14            | 938.28             | 0.482                          | 1501.88            | 724.18             |
| A_68_P31120933 | chr17:28314032-28314076                           | NM_172617:-308        | Zfp523        | PROMOTER               | 1.038                                                        | 2.786                          | 696.21             | 1939.46            | 2.893                          | 639.86             | 1850.80            |
| A_68_P25769255 | chr8:34627820-34627864                            | ENSMUST00000124496:47 |               | INSIDE                 | 1.038                                                        | 3.548                          | 786.16             | 2788.97            | 3.682                          | 751.30             | 2766.48            |
| A_68_P32097048 | chr19:37767375-37767419                           | NM_001105201:7227     | Cyp26c1       | INSIDE                 | 1.037                                                        | 0.617                          | 1787.14            | 1103.34            | 0.640                          | 1365.30            | 874.17             |
| A_68_P28558336 | chr12:78340320-78340364                           | NM_016893:335         | Fut8          | INSIDE                 | 1.037                                                        | 2.225                          | 639.18             | 1422.50            | 2.308                          | 614.72             | 1418.76            |
| A_68_P29612959 | chr14:55172748-55172792                           | NM_145462:428         | Haus4         | INSIDE                 | 1.037                                                        | 1.658                          | 982.69             | 1629.49            | 1.719                          | 936.91             | 1610.96            |
| A_68_P28067971 | chr11:100275626-100275670                         | NM_176830:485         | Leprel4       | INSIDE                 | 1.037                                                        | 1.591                          | 1039.17            | 1653.26            | 1.650                          | 1005.57            | 1659.17            |
| A_68_P23837517 | chr5:81448669-81448713                            | NM_198702:-1927       | Lphn3         | PROMOTER               | 1.037                                                        | 2.101                          | 632.54             | 1328.75            | 2.179                          | 663.81             | 1446.45            |
| A_68_P30447287 | chr15:93333954-93333998                           | NM_001033217:92346    | Prickle1      | INSIDE                 | 1.037                                                        | 3.695                          | 766.22             | 2830.95            | 3.832                          | 677.95             | 2597.98            |
| A_68_P24983629 | chr7:17441116-17441160                            | NM_178900:12725       | Prkd2         | INSIDE                 | 1.037                                                        | 3.555                          | 992.75             | 3529.03            | 3.685                          | 790.63             | 2913.61            |
| A_68_P26349530 | chr9:21722254-21722298                            | NM_031874:289         | Rab3d         | INSIDE                 | 1.037                                                        | 1.541                          | 639.79             | 985.72             | 1.598                          | 696.64             | 1113.24            |
| A_68_P26816016 | chr9:108564748-108564792                          | NM_020520:342         | Ste25a20      | INSIDE                 | 1.037                                                        | 3.447                          | 447.33             | 1541.75            | 3.574                          | 449.75             | 1607.19            |
| A_68_P26042147 | chr8:91151173-91151217                            | NM_027840:8833        | Snx20         | INSIDE                 | 1.037                                                        | 2.059                          | 367.65             | 756.90             | 2.135                          | 339.76             | 725.27             |
| A_68_P21266382 | chr2:61643297-61643341                            | NM_009322:809         | Tbr1          | INSIDE                 | 1.037                                                        | 0.446                          | 1421.80            | 634.29             | 0.463                          | 1192.75            | 551.66             |

| ProbeName      | Target position of probe on CpG island microarray | TargetID                 | GeneSymbol    | CpG island Description | Ratio of relative methylation (TiO <sub>2</sub> -NP/Vehicle) | Sham group                     |                    |                    | TiO <sub>2</sub> -H group      |                    |                    |
|----------------|---------------------------------------------------|--------------------------|---------------|------------------------|--------------------------------------------------------------|--------------------------------|--------------------|--------------------|--------------------------------|--------------------|--------------------|
|                |                                                   |                          |               |                        |                                                              | Relative methylation (Cy5/Cy3) | Cy3 signal (Input) | Cy5 signal (MeDIP) | Relative methylation (Cy5/Cy3) | Cy3 signal (Input) | Cy5 signal (MeDIP) |
| A_68_P25701520 | chr8:18950897-18950941                            | NM_001113350:55          | Xkr5          | INSIDE                 | 1.037                                                        | 1.822                          | 1512.55            | 2756.17            | 1.889                          | 1278.15            | 2414.99            |
| A_68_P24951573 | chr7:4966992-4967036                              | NM_025324:-95            | Zfp524        | DIVERGENT_PROMOTER     | 1.037                                                        | 1.743                          | 1867.69            | 3256.12            | 1.809                          | 1541.37            | 2787.69            |
| A_68_P27590827 | chr11:11362280-11362324                           | NM_001185153:120         | Zpbp          | INSIDE                 | 1.037                                                        | 1.561                          | 685.69             | 1070.22            | 1.618                          | 651.09             | 1053.62            |
| A_68_P31116860 | chr17:27650768-27650812                           | ENSMUST0000088073:-504   |               | DIVERGENT_PROMOTER     | 1.037                                                        | 1.512                          | 879.05             | 1329.36            | 1.568                          | 733.42             | 1149.87            |
| A_68_P31791923 | chr18:67608414-67608458                           | NM_027130:354            | Afig3l2       | INSIDE                 | 1.036                                                        | 1.438                          | 1375.24            | 1977.83            | 1.490                          | 1222.52            | 1821.31            |
| A_68_P32710890 | chrX:139401516-139401560                          | NM_019496:-267           | Ammecr1       | PROMOTER               | 1.036                                                        | 4.018                          | 347.15             | 1394.69            | 4.162                          | 215.96             | 898.81             |
| A_68_P27278226 | chr10:79144635-79144681                           | NM_177613:-281           | Cdc34         | PROMOTER               | 1.036                                                        | 1.428                          | 1182.18            | 1688.34            | 1.479                          | 1022.12            | 1511.95            |
| A_68_P23448649 | chr5:4104754-4104798                              | NM_020010:-79            | Cyp51         | PROMOTER               | 1.036                                                        | 0.596                          | 1307.18            | 778.61             | 0.617                          | 1031.83            | 636.76             |
| A_68_P31258212 | chr17:56901669-56901713                           | NM_144858:-2483          | Dus3l         | DIVERGENT_PROMOTER     | 1.036                                                        | 1.343                          | 2116.79            | 2841.86            | 1.391                          | 1599.41            | 2224.80            |
| A_68_P28187033 | chr11:120685676-120685720                         | NM_007988:163            | Fasn          | INSIDE                 | 1.036                                                        | 1.650                          | 2813.18            | 4640.61            | 1.710                          | 2482.17            | 4243.68            |
| A_68_P24115931 | chr5:135825936-135825980                          | NM_033571:-97            | Fkbp6         | DIVERGENT_PROMOTER     | 1.036                                                        | 2.488                          | 621.20             | 1545.26            | 2.578                          | 519.02             | 1338.02            |
| A_68_P21874405 | chr2:174111730-174111779                          | NM_019690:1934           | Gnas          | INSIDE                 | 1.036                                                        | 1.839                          | 537.74             | 988.94             | 1.905                          | 404.64             | 770.93             |
| A_68_P28997685 | chr13:44829480-44829524                           | NM_001205043:2863        | Jarid2        | INSIDE                 | 1.036                                                        | 0.548                          | 1286.57            | 705.20             | 0.568                          | 1014.16            | 576.16             |
| A_68_P26643862 | chr9:75257222-75257266                            | NM_027418:-78            | Mapk6         | PROMOTER               | 1.036                                                        | 2.289                          | 799.88             | 1830.75            | 2.371                          | 724.01             | 1716.95            |
| A_68_P23345718 | chr4:137990544-137990588                          | NM_026689:-20            | Mul1          | PROMOTER               | 1.036                                                        | 1.630                          | 2063.11            | 3362.57            | 1.689                          | 1589.54            | 2684.37            |
| A_68_P31866222 | chr18:80894933-80894977                           | NM_001164111:9958        | Nfate1        | INSIDE                 | 1.036                                                        | 2.134                          | 555.22             | 1185.09            | 2.212                          | 487.50             | 1078.39            |
| A_68_P30346558 | chr15:76004732-76004776                           | NM_201394:21386          | Plec          | INSIDE                 | 1.036                                                        | 3.094                          | 237.53             | 734.95             | 3.206                          | 181.82             | 582.85             |
| A_68_P26240715 | chr8:126178067-126178111                          | NM_133955:260            | Rhou          | INSIDE                 | 1.036                                                        | 0.536                          | 1978.12            | 1059.92            | 0.555                          | 1563.45            | 868.16             |
| A_68_P23234754 | chr4:117166920-117166964                          | NM_025739:2578           | Rnf220        | INSIDE                 | 1.036                                                        | 1.395                          | 1066.48            | 1488.12            | 1.446                          | 905.07             | 1308.34            |
| A_68_P29041945 | chr13:53206732-53206776                           | NM_013846:174724         | Ror2          | INSIDE                 | 1.036                                                        | 2.572                          | 1137.57            | 2926.33            | 2.665                          | 813.07             | 2166.50            |
| A_68_P20634554 | chr1:136543381-136543425                          | NM_009307:145            | Syt2          | INSIDE                 | 1.036                                                        | 1.661                          | 576.40             | 957.34             | 1.721                          | 519.74             | 894.59             |
| A_68_P25615129 | chr8:3679115-3679159                              | NM_025701:2660           | Trappc5       | INSIDE                 | 1.036                                                        | 3.334                          | 647.76             | 2159.57            | 3.454                          | 608.65             | 2102.57            |
| A_68_P32753664 | chrX:149932965-149933009                          | NM_018798:212            | Ublqn2        | INSIDE                 | 1.036                                                        | 2.845                          | 611.01             | 1738.17            | 2.948                          | 373.69             | 1101.56            |
| A_68_P27645074 | chr11:23207052-23207096                           | NM_001190401:180         | Usp34         | INSIDE                 | 1.036                                                        | 1.397                          | 2055.29            | 2871.92            | 1.448                          | 1681.68            | 2435.10            |
| A_68_P20350471 | chr1:74830842-74830886                            | NM_009526:12399          | Wnt6          | INSIDE                 | 1.036                                                        | 2.541                          | 844.23             | 2144.90            | 2.633                          | 769.42             | 2026.00            |
| A_68_P32403976 | chrX:55291949-55291993                            | NM_009575:8166           | Zic3          | DOWNSTREAM             | 1.036                                                        | 1.984                          | 1757.44            | 3486.15            | 2.055                          | 950.45             | 1952.99            |
| A_68_P31022096 | chr17:6257118-6257162                             | ENSMUST00000121576:3238  |               | DOWNSTREAM             | 1.036                                                        | 0.620                          | 2682.79            | 1664.52            | 0.643                          | 2215.00            | 1424.37            |
| A_68_P28050435 | chr11:97277300-97277344                           | ENSMUST00000121799:476   |               | INSIDE                 | 1.036                                                        | 1.627                          | 1294.40            | 2106.35            | 1.685                          | 1108.73            | 1868.33            |
| A_68_P27813411 | chr11:54846956-54847000                           | NM_001110211:-5          | Anxa6         | PROMOTER               | 1.035                                                        | 0.698                          | 2470.01            | 1722.97            | 0.722                          | 1877.85            | 1355.44            |
| A_68_P24761384 | chr6:113709003-113709047                          | NM_001036684:132346      | Atp2b2        | INSIDE                 | 1.035                                                        | 2.056                          | 579.35             | 1190.93            | 2.127                          | 442.24             | 940.81             |
| A_68_P28752037 | chr12:113960819-113960863                         | NM_001024602:456         | AW555464      | INSIDE                 | 1.035                                                        | 1.627                          | 566.01             | 921.04             | 1.684                          | 538.58             | 906.72             |
| A_68_P26844380 | chr9:114294100-114294144                          | NM_019922:5708           | Crtap         | INSIDE                 | 1.035                                                        | 2.128                          | 491.74             | 1046.51            | 2.203                          | 392.87             | 865.70             |
| A_68_P22288618 | chr3:83843229-83843273                            | NM_172681:833            | D930015E06Rik | INSIDE                 | 1.035                                                        | 0.591                          | 1843.04            | 1088.83            | 0.611                          | 1386.08            | 847.12             |
| A_68_P28525539 | chr12:72419195-72419245                           | NM_001190466:8350        | Daet1         | INSIDE                 | 1.035                                                        | 3.546                          | 626.62             | 2222.31            | 3.671                          | 501.31             | 1840.30            |
| A_68_P26674979 | chr9:81526399-81526443                            | NM_010482:-261           | Htr1b         | PROMOTER               | 1.035                                                        | 1.798                          | 869.89             | 1563.66            | 1.860                          | 717.48             | 1334.53            |
| A_68_P27282840 | chr10:79845290-79845334                           | NM_198615:5084           | Mex3d         | INSIDE                 | 1.035                                                        | 2.294                          | 1765.78            | 4050.84            | 2.374                          | 1251.80            | 2971.21            |
| A_68_P23585506 | chr5:33128194-33128238                            | NM_177298:59             | Pisd          | INSIDE                 | 1.035                                                        | 1.408                          | 4637.86            | 6529.07            | 1.456                          | 3578.25            | 5211.23            |
| A_68_P26804663 | chr9:106587992-106588036                          | NM_011573:-16            | Tex264        | PROMOTER               | 1.035                                                        | 2.154                          | 942.34             | 2030.14            | 2.230                          | 738.81             | 1647.26            |
| A_68_P27564657 | chr11:5617071-5617115                             | NM_178623:24087          | Urgcp         | INSIDE                 | 1.035                                                        | 3.082                          | 624.35             | 1924.52            | 3.190                          | 544.05             | 1735.43            |
| A_68_P28611535 | chr12:88019970-88020014                           | NM_177354:343            | Vash1         | INSIDE                 | 1.035                                                        | 1.527                          | 597.85             | 913.12             | 1.581                          | 572.44             | 905.30             |
| A_68_P32455383 | chrX:69062125-69062169                            | NM_001081356:29          | Vma21         | INSIDE                 | 1.035                                                        | 1.730                          | 832.67             | 1440.21            | 1.790                          | 468.95             | 839.62             |
| A_68_P21779867 | chr2:157739997-157740041                          | NM_198627:-370           | Vstm2l        | PROMOTER               | 1.035                                                        | 1.567                          | 7678.84            | 12031.63           | 1.622                          | 5888.38            | 9553.04            |
| A_68_P24097667 | chr5:131782979-131783023                          | NM_145218:392            | Wbscr17       | INSIDE                 | 1.035                                                        | 1.617                          | 584.26             | 944.73             | 1.674                          | 430.13             | 719.94             |
| A_68_P23396095 | chr4:148098538-148098582                          | ENSMUST00000139895:10749 |               | DOWNSTREAM             | 1.035                                                        | 1.650                          | 1767.98            | 2917.94            | 1.708                          | 1445.35            | 2469.34            |
| A_68_P26430868 | chr9:37296656-37296700                            | NM_146222:-227           | BC024479      | PROMOTER               | 1.034                                                        | 2.113                          | 814.37             | 1720.44            | 2.185                          | 716.10             | 1565.02            |
| A_68_P32680074 | chrX:132749644-132749688                          | NM_009052:386            | Bex1          | INSIDE                 | 1.034                                                        | 1.702                          | 1050.85            | 1788.73            | 1.760                          | 644.26             | 1133.76            |
| A_68_P31111039 | chr17:26698374-26698418                           | NM_026170:-60            | Ergic1        | PROMOTER               | 1.034                                                        | 0.698                          | 2460.87            | 1716.89            | 0.721                          | 1979.24            | 1427.78            |
| A_68_P24046890 | chr5:122302790-122302834                          | NM_175474:3776           | Fam109a       | INSIDE                 | 1.034                                                        | 2.385                          | 1289.17            | 3074.46            | 2.467                          | 1194.99            | 2948.05            |
| A_68_P28266915 | chr12:16807626-16807670                           | NM_015764:44             | Greb1         | INSIDE                 | 1.034                                                        | 1.747                          | 1038.38            | 1814.19            | 1.806                          | 1010.22            | 1824.18            |
| A_68_P25285298 | chr7:91032485-91032529                            | NM_030705:345            | Mesdc1        | INSIDE                 | 1.034                                                        | 1.865                          | 338.08             | 630.54             | 1.928                          | 308.74             | 595.31             |
| A_68_P21840229 | chr2:168056835-168056879                          | NM_001160330:735         | Mocs3         | INSIDE                 | 1.034                                                        | 3.492                          | 763.98             | 2667.45            | 3.609                          | 780.08             | 2815.64            |

| ProbeName      | Target position of probe on CpG island microarray | TargetID            | GeneSymbol    | CpG island Description | Ratio of relative methylation (TiO <sub>2</sub> -NP/Vehicle) | Sham group                     |                    |                    | TiO <sub>2</sub> -H group      |                    |                    |
|----------------|---------------------------------------------------|---------------------|---------------|------------------------|--------------------------------------------------------------|--------------------------------|--------------------|--------------------|--------------------------------|--------------------|--------------------|
|                |                                                   |                     |               |                        |                                                              | Relative methylation (Cy5/Cy3) | Cy3 signal (Input) | Cy5 signal (MeDIP) | Relative methylation (Cy5/Cy3) | Cy3 signal (Input) | Cy5 signal (MeDIP) |
| A_68_P20936019 | chr1:192887145-192887189                          | NM_198654:267       | Nsl1          | INSIDE                 | 1.034                                                        | 1.556                          | 689.60             | 1072.86            | 1.608                          | 623.14             | 1002.03            |
| A_68_P28941007 | chr13:34967553-34967597                           | NM_013830:212       | Prpf4b        | INSIDE                 | 1.034                                                        | 0.472                          | 1266.44            | 597.40             | 0.488                          | 1056.25            | 515.21             |
| A_68_P25499769 | chr7:133436111-133436155                          | NM_145587:20000     | Sbk1          | INSIDE                 | 1.034                                                        | 2.798                          | 709.88             | 1986.10            | 2.892                          | 637.95             | 1845.02            |
| A_68_P26823380 | chr9:110283014-110283058                          | NM_001001144:47240  | Scap          | INSIDE                 | 1.034                                                        | 2.914                          | 1065.15            | 3104.32            | 3.013                          | 827.75             | 2493.91            |
| A_68_P24764863 | chr6:114232692-114232736                          | NM_178703:86        | Slc6a1        | INSIDE                 | 1.034                                                        | 1.392                          | 3900.18            | 5428.39            | 1.440                          | 2471.85            | 3558.28            |
| A_68_P28048175 | chr11:96880255-96880299                           | NM_031183:5394      | Sp6           | INSIDE                 | 1.034                                                        | 2.620                          | 533.59             | 1398.23            | 2.711                          | 486.20             | 1317.99            |
| A_68_P25283749 | chr7:90780539-90780583                            | NM_023377:34        | Stard5        | INSIDE                 | 1.034                                                        | 0.561                          | 1071.33            | 601.53             | 0.581                          | 928.65             | 539.09             |
| A_68_P22949805 | chr4:58219063-58219107                            | NM_022814:384       | Svep1         | INSIDE                 | 1.034                                                        | 4.156                          | 1248.61            | 5189.78            | 4.299                          | 1134.26            | 4876.02            |
| A_68_P25409834 | chr7:116895598-116895642                          | NM_020050:157       | Tmem9b        | INSIDE                 | 1.034                                                        | 2.971                          | 944.98             | 2807.67            | 3.073                          | 830.74             | 2552.76            |
| A_68_P23400514 | chr4:148800490-148800534                          | NM_022022:228       | Ube4b         | INSIDE                 | 1.034                                                        | 1.679                          | 4742.69            | 7961.41            | 1.735                          | 4031.17            | 6995.60            |
| A_68_P29650713 | chr14:62175501-62175545                           | NM_025697:201       | 6330409N04Rik | INSIDE                 | 1.033                                                        | 3.506                          | 910.36             | 3191.78            | 3.623                          | 774.37             | 2805.39            |
| A_68_P25960290 | chr8:74764202-74764246                            | NM_007456:194       | Ap1m1         | INSIDE                 | 1.033                                                        | 1.751                          | 901.83             | 1578.83            | 1.809                          | 790.96             | 1430.45            |
| A_68_P27180607 | chr10:60915001-60915045                           | NM_010124:395       | Eif4ebp2      | INSIDE                 | 1.033                                                        | 1.604                          | 895.74             | 1437.11            | 1.657                          | 817.39             | 1354.26            |
| A_68_P25979792 | chr8:79423193-79423237                            | NR_028579:858       | Gm10649       | INSIDE                 | 1.033                                                        | 1.714                          | 524.68             | 899.44             | 1.772                          | 434.27             | 769.35             |
| A_68_P31116317 | chr17:27571773-27571817                           | NM_001013385:68455  | Grm4          | INSIDE                 | 1.033                                                        | 2.342                          | 1021.64            | 2392.55            | 2.419                          | 829.42             | 2006.29            |
| A_68_P24637120 | chr6:91106803-91106847                            | NM_144919:16        | Hdac11        | INSIDE                 | 1.033                                                        | 1.558                          | 1397.49            | 2177.90            | 1.610                          | 1268.38            | 2041.58            |
| A_68_P30991214 | chr16:96349614-96349659                           | NM_008251:-304      | Hmgn1         | PROMOTER               | 1.033                                                        | 0.585                          | 1727.85            | 1009.99            | 0.604                          | 1372.90            | 828.79             |
| A_68_P24132969 | chr5:139470681-139470725                          | NM_008808:205       | Pdgfra        | INSIDE                 | 1.033                                                        | 4.776                          | 2010.46            | 9602.70            | 4.932                          | 1705.12            | 8409.32            |
| A_68_P30423621 | chr15:88997899-88997943                           | NM_001159521:6360   | Plxnb2        | INSIDE                 | 1.033                                                        | 1.589                          | 1142.49            | 1815.02            | 1.642                          | 1039.96            | 1707.18            |
| A_68_P31257077 | chr17:56723655-56723699                           | NM_001029979:330    | Safb2         | INSIDE                 | 1.033                                                        | 0.625                          | 2293.84            | 1434.48            | 0.646                          | 1865.71            | 1204.66            |
| A_68_P24153011 | chr5:143194631-143194675                          | NM_146257:16598     | Slc29a4       | INSIDE                 | 1.033                                                        | 3.144                          | 6262.46            | 19691.47           | 3.248                          | 4624.55            | 15019.87           |
| A_68_P25425958 | chr7:119823278-119823322                          | NM_001166584:467    | Tead1         | INSIDE                 | 1.033                                                        | 0.500                          | 1122.70            | 560.84             | 0.516                          | 1034.62            | 533.95             |
| A_68_P24761358 | chr6:113705242-113705289                          | NM_001036684:136105 | Atp2b2        | INSIDE                 | 1.032                                                        | 2.418                          | 240.07             | 580.50             | 2.496                          | 224.38             | 560.05             |
| A_68_P29977063 | chr15:3945932-3945978                             | NM_145930:-202      | AW549877      | PROMOTER               | 1.032                                                        | 1.823                          | 1176.72            | 2145.28            | 1.881                          | 862.16             | 1622.06            |
| A_68_P24791288 | chr6:119058455-119058499                          | NM_001159533:-269   | Caena1c       | PROMOTER               | 1.032                                                        | 2.194                          | 601.87             | 1320.49            | 2.264                          | 535.79             | 1213.15            |
| A_68_P25601084 | chr7:150646850-150646894                          | NM_001161624:83     | Cdkn1c        | INSIDE                 | 1.032                                                        | 1.796                          | 1092.50            | 1961.75            | 1.853                          | 1020.12            | 1890.63            |
| A_68_P24597420 | chr6:84085413-84085457                            | NM_021469:116052    | Dysf          | INSIDE                 | 1.032                                                        | 2.164                          | 995.28             | 2154.09            | 2.233                          | 803.20             | 1793.80            |
| A_68_P28940414 | chr13:34838852-34838896                           | NM_138746:7364      | Fam50b        | INSIDE                 | 1.032                                                        | 2.562                          | 747.74             | 1915.36            | 2.643                          | 659.01             | 1741.99            |
| A_68_P22291214 | chr3:84284017-84284061                            | NM_001205355:-625   | Fhdc1         | PROMOTER               | 1.032                                                        | 0.660                          | 2215.56            | 1461.68            | 0.681                          | 1695.82            | 1154.59            |
| A_68_P26587423 | chr9:65239016-65239060                            | NM_028974:421       | Kbtbd13       | INSIDE                 | 1.032                                                        | 1.553                          | 733.37             | 1139.15            | 1.603                          | 665.63             | 1067.01            |
| A_68_P25954428 | chr8:73366677-73366723                            | NM_032397:14207     | Kenn1         | INSIDE                 | 1.032                                                        | 2.860                          | 277.02             | 792.18             | 2.952                          | 224.19             | 661.88             |
| A_68_P31777748 | chr18:65047791-65047835                           | NM_001114386:403    | Nedd4l        | INSIDE                 | 1.032                                                        | 2.290                          | 1227.91            | 2811.75            | 2.364                          | 1109.68            | 2623.49            |
| A_68_P27280127 | chr10:79440093-79440137                           | NM_001003949:6961   | ORF61         | INSIDE                 | 1.032                                                        | 2.253                          | 781.01             | 1759.84            | 2.326                          | 697.31             | 1622.13            |
| A_68_P27993896 | chr11:87171950-87171994                           | NM_177167:524       | Ppm1c         | INSIDE                 | 1.032                                                        | 0.546                          | 1676.43            | 915.18             | 0.563                          | 1398.89            | 787.82             |
| A_68_P31938928 | chr19:7343225-7343269                             | NM_054048:-1007     | Recor2        | PROMOTER               | 1.032                                                        | 1.538                          | 1092.18            | 1679.46            | 1.588                          | 1006.77            | 1598.35            |
| A_68_P28755238 | chr12:114425814-114425858                         | NM_153776:1723      | Tmem121       | INSIDE                 | 1.032                                                        | 0.606                          | 1071.35            | 648.71             | 0.625                          | 848.34             | 529.96             |
| A_68_P31092443 | chr17:23713479-23713523                           | NM_011747:22954     | Zfp13         | INSIDE                 | 1.032                                                        | 1.768                          | 1244.52            | 2200.40            | 1.825                          | 980.74             | 1790.06            |
| A_68_P25005236 | chr7:25292275-25292319                            | NM_146183:191       | Zfp428        | INSIDE                 | 1.032                                                        | 0.421                          | 1788.70            | 752.68             | 0.434                          | 1410.15            | 612.15             |
| A_68_P28175550 | chr11:118914821-118914865                         |                     |               | Unknown                | 1.032                                                        | 0.416                          | 2274.58            | 947.24             | 0.430                          | 1714.19            | 736.82             |
| A_68_P31929125 | chr19:5503714-5503758                             | NM_023781:51        | 1700020D05Rik |                        | 1.031                                                        | 1.782                          | 751.37             | 1338.60            | 1.838                          | 584.78             | 1074.55            |
| A_68_P25656693 | chr8:11636046-11636090                            | NM_133971:-314      | Ankrd10       | PROMOTER               | 1.031                                                        | 1.475                          | 4424.38            | 6526.53            | 1.520                          | 3366.26            | 5117.39            |
| A_68_P25614032 | chr8:3451969-3452013                              | NM_133962:58983     | Arhgef18      | INSIDE                 | 1.031                                                        | 2.770                          | 694.50             | 1923.90            | 2.857                          | 611.76             | 1747.75            |
| A_68_P30026214 | chr15:13103007-13103051                           | NM_007666:366       | Cdh6          | INSIDE                 | 1.031                                                        | 3.209                          | 3263.97            | 10475.47           | 3.308                          | 2614.19            | 8647.59            |
| A_68_P29578607 | chr14:47452213-47452258                           | NM_026832:317       | Cgrrf1        | INSIDE                 | 1.031                                                        | 2.074                          | 2204.15            | 4571.36            | 2.139                          | 1837.85            | 3930.78            |
| A_68_P23327636 | chr4:134828309-134828353                          | NM_013885:345       | Clic4         | INSIDE                 | 1.031                                                        | 0.466                          | 1285.36            | 599.31             | 0.481                          | 1328.66            | 638.97             |
| A_68_P29487107 | chr14:28241923-28241967                           | NM_001114879:-88    | D14Abblc      | PROMOTER               | 1.031                                                        | 1.647                          | 607.28             | 1000.34            | 1.699                          | 551.34             | 936.48             |
| A_68_P30414446 | chr15:87454576-87454620                           | NM_134096:-1061     | Fam19a5       | PROMOTER               | 1.031                                                        | 1.865                          | 1069.29            | 1994.25            | 1.923                          | 974.99             | 1874.71            |
| A_68_P23438375 | chr4:154771703-154771749                          | NM_008072:452       | Gabrd         | INSIDE                 | 1.031                                                        | 1.985                          | 466.35             | 925.85             | 2.047                          | 386.00             | 790.26             |
| A_68_P28041930 | chr11:95868489-95868534                           | NM_009951:-1253     | Igf2bp1       | PROMOTER               | 1.031                                                        | 2.012                          | 490.71             | 987.56             | 2.074                          | 458.50             | 950.99             |
| A_68_P28605006 | chr12:86940162-86940206                           | NM_030887:-181      | Jdp2          | PROMOTER               | 1.031                                                        | 1.751                          | 1925.30            | 3371.83            | 1.805                          | 1656.70            | 2990.08            |
| A_68_P31779041 | chr18:65243342-65243386                           | NM_031881:60184     | Nedd4l        | INSIDE                 | 1.031                                                        | 2.770                          | 1161.82            | 3217.72            | 2.856                          | 880.80             | 2515.17            |

| ProbeName      | Target position of probe on CpG island microarray | TargetID                  | GeneSymbol    | CpG island Description | Ratio of relative methylation (TiO <sub>2</sub> -NP/Vehicle) | Sham group                     |                    |                    | TiO <sub>2</sub> -H group      |                    |                    |
|----------------|---------------------------------------------------|---------------------------|---------------|------------------------|--------------------------------------------------------------|--------------------------------|--------------------|--------------------|--------------------------------|--------------------|--------------------|
|                |                                                   |                           |               |                        |                                                              | Relative methylation (Cy5/Cy3) | Cy3 signal (Input) | Cy5 signal (MeDIP) | Relative methylation (Cy5/Cy3) | Cy3 signal (Input) | Cy5 signal (MeDIP) |
| A_68_P26551405 | chr9:58884860-58884904                            | NM_001042752:-634         | Neo1          | PROMOTER               | 1.031                                                        | 1.443                          | 882.00             | 1273.04            | 1.489                          | 889.29             | 1323.91            |
| A_68_P25088122 | chr7:51807387-51807431                            | NM_009473:1885            | Nr1h2         | INSIDE                 | 1.031                                                        | 1.923                          | 1669.20            | 3209.82            | 1.982                          | 1448.21            | 2870.47            |
| A_68_P31626610 | chr18:37159323-37159367                           | NM_009961:-5629           | Pcdh10        | PROMOTER               | 1.031                                                        | 1.794                          | 857.81             | 1539.11            | 1.849                          | 649.94             | 1202.03            |
| A_68_P27230709 | chr10:70062556-70062600                           | NM_178621:-539            | Phyhipl       | PROMOTER               | 1.031                                                        | 2.478                          | 392.58             | 972.95             | 2.555                          | 363.29             | 928.34             |
| A_68_P28085165 | chr11:103273873-103273917                         | NM_183034:84              | Plekhl1       | INSIDE                 | 1.031                                                        | 0.540                          | 1694.59            | 914.47             | 0.556                          | 1399.44            | 778.57             |
| A_68_P21870537 | chr2:173411492-173411536                          | NR_027957:73526           | Ppp4r1l-ps    | INSIDE                 | 1.031                                                        | 1.561                          | 4188.44            | 6538.08            | 1.609                          | 3094.03            | 4979.29            |
| A_68_P25457393 | chr7:125387260-125387304                          | NM_001031814:-131         | Smg1          | DIVERGENT_PROMOTER     | 1.031                                                        | 1.808                          | 2888.02            | 5220.40            | 1.864                          | 1957.15            | 3648.09            |
| A_68_P22049387 | chr3:34548813-34548857                            | NM_011443:-92             | Sox2          | PROMOTER               | 1.031                                                        | 2.841                          | 1505.07            | 4275.21            | 2.929                          | 1248.18            | 3655.46            |
| A_68_P25261546 | chr7:86660511-86660555                            | ENSMUST00000150985:415    |               | INSIDE                 | 1.031                                                        | 1.979                          | 1308.76            | 2590.42            | 2.041                          | 1185.14            | 2418.82            |
| A_68_P24686651 | chr6:99472059-99472103                            | ENSMUST00000155466:144711 |               | INSIDE                 | 1.031                                                        | 1.535                          | 1974.88            | 3031.03            | 1.582                          | 1741.99            | 2755.71            |
| A_68_P30413823 | chr15:87375395-87375439                           | ENSMUST00000169110:513    |               | INSIDE                 | 1.031                                                        | 2.093                          | 961.66             | 2012.79            | 2.157                          | 899.73             | 1940.63            |
| A_68_P32290254 | chrX:20425761-20425805                            | NM_001159645:114          | Araf          | INSIDE                 | 1.030                                                        | 2.332                          | 2458.89            | 5733.16            | 2.401                          | 1085.01            | 2604.74            |
| A_68_P26132519 | chr8:107778394-107778438                          | NM_178879:635             | B3gnt9-ps     | INSIDE                 | 1.030                                                        | 1.638                          | 1660.69            | 2720.64            | 1.688                          | 1382.40            | 2333.64            |
| A_68_P28731502 | chr12:110271962-110272006                         | NM_001163175:34443        | Begain        | INSIDE                 | 1.030                                                        | 2.963                          | 1096.64            | 3249.30            | 3.052                          | 976.94             | 2981.76            |
| A_68_P20969749 | chr2:4639031-4639075                              | NM_001190400:176          | Bend7         | INSIDE                 | 1.030                                                        | 2.808                          | 866.13             | 2432.12            | 2.894                          | 794.12             | 2297.88            |
| A_68_P24397197 | chr6:42214753-42214798                            | NM_007610:-262            | Casp2         | PROMOTER               | 1.030                                                        | 2.111                          | 410.37             | 866.29             | 2.173                          | 344.71             | 749.19             |
| A_68_P30382334 | chr15:82074972-82075016                           | NM_001080158:-228         | Cenpm         | PROMOTER               | 1.030                                                        | 1.446                          | 876.38             | 1267.41            | 1.490                          | 759.77             | 1131.79            |
| A_68_P27212449 | chr10:67001247-67001291                           | NM_010118:652             | Egr2          | INSIDE                 | 1.030                                                        | 1.820                          | 2986.82            | 5436.32            | 1.875                          | 2064.55            | 3870.68            |
| A_68_P20091641 | chr1:24106778-24106822                            | NM_026604:380             | Fam135a       | INSIDE                 | 1.030                                                        | 2.049                          | 898.59             | 1841.41            | 2.111                          | 786.19             | 1659.41            |
| A_68_P27813684 | chr11:54911411-54911457                           | NM_010299:-52             | Gm2a          | PROMOTER               | 1.030                                                        | 1.568                          | 1881.73            | 2950.07            | 1.615                          | 1496.02            | 2416.33            |
| A_68_P27572312 | chr11:7113377-7113421                             | NM_008343:528             | Igfbp3        | INSIDE                 | 1.030                                                        | 1.451                          | 1149.90            | 1668.58            | 1.494                          | 1051.19            | 1570.37            |
| A_68_P30366726 | chr15:79315953-79315997                           | NM_008427:19697           | Kenj4         | INSIDE                 | 1.030                                                        | 3.981                          | 698.63             | 2781.50            | 4.102                          | 558.33             | 2290.29            |
| A_68_P31491264 | chr18:10726495-10726539                           | NM_144860:894             | Mib1          | INSIDE                 | 1.030                                                        | 1.556                          | 1000.29            | 1556.00            | 1.602                          | 881.42             | 1412.41            |
| A_68_P24627746 | chr6:89306761-89306805                            | NM_008881:5825            | Plxna1        | INSIDE                 | 1.030                                                        | 3.123                          | 1312.80            | 4100.27            | 3.218                          | 1051.69            | 3384.75            |
| A_68_P28599774 | chr12:86039811-86039855                           | NM_001033334:-75          | Tmem90a       | PROMOTER               | 1.030                                                        | 2.358                          | 2319.90            | 5470.56            | 2.430                          | 1980.16            | 4810.80            |
| A_68_P26721504 | chr9:91259471-91259515                            | NM_009573:1145            | Zic1          | INSIDE                 | 1.030                                                        | 1.441                          | 996.30             | 1435.20            | 1.484                          | 894.71             | 1327.57            |
| A_68_P30501997 | chr15:102917300-102917348                         | AF216290:299758           |               | INSIDE                 | 1.030                                                        | 1.945                          | 657.00             | 1277.56            | 2.004                          | 611.37             | 1224.95            |
| A_68_P28153581 | chr11:115309405-115309449                         | NM_001033775:7568         | 4933422H20Rik | INSIDE                 | 1.029                                                        | 5.051                          | 1178.85            | 5954.61            | 5.198                          | 1109.58            | 5767.92            |
| A_68_P26756438 | chr9:97933240-97933284                            | NM_022319:324             | Clstn2        | INSIDE                 | 1.029                                                        | 2.744                          | 1649.89            | 4526.86            | 2.822                          | 1299.56            | 3667.51            |
| A_68_P29644189 | chr14:60997251-60997301                           | NM_001164705:154          | Fam123a       | INSIDE                 | 1.029                                                        | 1.827                          | 441.69             | 806.97             | 1.881                          | 406.27             | 764.14             |
| A_68_P25671124 | chr8:13907951-13907995                            | NM_025785:167             | Fbxo25        | INSIDE                 | 1.029                                                        | 1.811                          | 1804.36            | 3267.53            | 1.864                          | 1521.83            | 2835.98            |
| A_68_P28707017 | chr12:106270861-106270905                         | NM_028419:-16             | Glxr5         | DIVERGENT_PROMOTER     | 1.029                                                        | 1.782                          | 845.17             | 1505.92            | 1.833                          | 596.79             | 1094.13            |
| A_68_P24932466 | chr6:147039958-147040002                          | NM_001081237:384          | Klhdc5        | INSIDE                 | 1.029                                                        | 1.895                          | 1143.85            | 2168.01            | 1.950                          | 1026.11            | 2000.51            |
| A_68_P24333872 | chr6:30688012-30688056                            | NM_008590:-28             | Mest          | PROMOTER               | 1.029                                                        | 2.211                          | 2738.46            | 6053.36            | 2.274                          | 2072.98            | 4714.91            |
| A_68_P30369637 | chr15:79832097-79832141                           | NM_011057:13120           | Pdgbf         | INSIDE                 | 1.029                                                        | 2.780                          | 1506.62            | 4189.03            | 2.860                          | 1458.62            | 4171.71            |
| A_68_P32065918 | chr19:31738447-31738491                           | NM_011160:392             | Prkg1         | INSIDE                 | 1.029                                                        | 0.667                          | 1407.21            | 938.85             | 0.687                          | 1170.65            | 803.78             |
| A_68_P20930617 | chr1:191994889-191994933                          | NM_008937:-351            | Prox1         | PROMOTER               | 1.029                                                        | 1.873                          | 704.80             | 1320.18            | 1.927                          | 573.73             | 1105.50            |
| A_68_P31067739 | chr17:15963621-15963665                           | NM_178615:-92             | Rgmb          | PROMOTER               | 1.029                                                        | 1.495                          | 2763.43            | 4131.25            | 1.538                          | 2182.18            | 3356.38            |
| A_68_P30955585 | chr16:90220935-90220979                           | NM_011434:-30             | Sod1          | PROMOTER               | 1.029                                                        | 1.353                          | 4048.46            | 5476.61            | 1.392                          | 2993.45            | 4168.26            |
| A_68_P30721026 | chr16:44347402-44347446                           | NM_144550:-89             | Spice1        | PROMOTER               | 1.029                                                        | 1.435                          | 2417.05            | 3467.50            | 1.477                          | 1935.51            | 2858.10            |
| A_68_P23416137 | chr4:151406428-151406472                          | NM_031867:6149            | Tas1r1        | INSIDE                 | 1.029                                                        | 2.737                          | 646.19             | 1768.58            | 2.817                          | 533.31             | 1502.54            |
| A_68_P28755248 | chr12:114426981-114427025                         | NM_153776:2889            | Tmem121       | INSIDE                 | 1.029                                                        | 2.173                          | 1000.10            | 2173.21            | 2.236                          | 691.94             | 1546.86            |
| A_68_P23984845 | chr5:111706231-111706275                          | NM_024477:397431          | Ttc28         | INSIDE                 | 1.029                                                        | 2.617                          | 807.63             | 2113.17            | 2.693                          | 666.53             | 1794.99            |
| A_68_P24424708 | chr6:47827424-47827468                            | NM_146175:-107            | Zfp282        | PROMOTER               | 1.029                                                        | 2.437                          | 522.35             | 1272.86            | 2.507                          | 523.32             | 1311.98            |
| A_68_P22630578 | chr3:148653042-148653086                          | ENSMUST00000098518:-784   |               | PROMOTER               | 1.029                                                        | 0.613                          | 1707.96            | 1046.38            | 0.630                          | 1327.81            | 836.92             |
| A_68_P31292456 | chr17:64213464-64213508                           | ENSMUST00000112829:123    |               | INSIDE                 | 1.029                                                        | 1.843                          | 910.38             | 1678.06            | 1.896                          | 954.33             | 1809.76            |
| A_68_P23361671 | chr4:140581070-140581114                          | NM_172122:28484           | Crocc         | INSIDE                 | 1.028                                                        | 2.620                          | 842.33             | 2207.10            | 2.694                          | 726.82             | 1957.86            |
| A_68_P31827569 | chr18:73913791-73913835                           | NM_053255:321             | Elacl         | INSIDE                 | 1.028                                                        | 1.683                          | 749.08             | 1260.90            | 1.731                          | 697.67             | 1207.77            |
| A_68_P29050429 | chr13:54723129-54723173                           | NM_178397:6               | Faf2          | INSIDE                 | 1.028                                                        | 2.981                          | 599.81             | 1787.77            | 3.065                          | 558.94             | 1713.31            |
| A_68_P25727490 | chr8:26629802-26629846                            | NM_001079908:581          | Fgfr1         | INSIDE                 | 1.028                                                        | 2.094                          | 893.57             | 1870.77            | 2.152                          | 775.80             | 1669.74            |
| A_68_P26348935 | chr9:21599484-21599528                            | NM_145611:3484            | Kank2         | INSIDE                 | 1.028                                                        | 2.743                          | 331.55             | 909.31             | 2.821                          | 275.87             | 778.14             |

| ProbeName      | Target position of probe on CpG island microarray | TargetID                | GeneSymbol | CpG island Description | Ratio of relative methylation (TiO <sub>2</sub> -NP/Vehicle) | Sham group                     |                    |                    | TiO <sub>2</sub> -H group      |                    |                    |
|----------------|---------------------------------------------------|-------------------------|------------|------------------------|--------------------------------------------------------------|--------------------------------|--------------------|--------------------|--------------------------------|--------------------|--------------------|
|                |                                                   |                         |            |                        |                                                              | Relative methylation (Cy5/Cy3) | Cy3 signal (Input) | Cy5 signal (MeDIP) | Relative methylation (Cy5/Cy3) | Cy3 signal (Input) | Cy5 signal (MeDIP) |
| A_68_P25926103 | chr8:67373325-67373369                            | NM_178633:370           | Klhl2      | INSIDE                 | 1.028                                                        | 0.540                          | 1851.67            | 999.81             | 0.555                          | 1586.97            | 881.25             |
| A_68_P27289569 | chr10:80883025-80883071                           | NM_008688:6870          | Nfic       | INSIDE                 | 1.028                                                        | 1.833                          | 3172.79            | 5816.68            | 1.884                          | 2464.77            | 4644.44            |
| A_68_P26345851 | chr9:20988585-20988629                            | NM_183408:18449         | Pde4a      | INSIDE                 | 1.028                                                        | 1.967                          | 2097.02            | 4125.40            | 2.022                          | 1792.47            | 3623.98            |
| A_68_P24117821 | chr5:136253656-136253701                          | NM_029659:577           | Styx11     | INSIDE                 | 1.028                                                        | 2.078                          | 537.56             | 1117.04            | 2.136                          | 435.59             | 930.37             |
| A_68_P31542078 | chr18:21054518-21054562                           | NM_177038:39            | Trappc8    | INSIDE                 | 1.028                                                        | 1.560                          | 747.21             | 1166.00            | 1.605                          | 800.51             | 1284.73            |
| A_68_P23246907 | chr4:119406501-119406545                          | ENSMUST00000123698:77   |            | INSIDE                 | 1.028                                                        | 2.880                          | 473.12             | 1362.40            | 2.959                          | 494.46             | 1463.14            |
| A_68_P28078743 | chr11:102157246-102157290                         | NM_001098836:675        | Atxn7l3    | INSIDE                 | 1.027                                                        | 0.526                          | 1465.70            | 771.14             | 0.540                          | 1137.92            | 614.75             |
| A_68_P25784088 | chr8:37210172-37210216                            | NM_172911:52313         | D8Erttd82c | INSIDE                 | 1.027                                                        | 1.990                          | 424.02             | 843.70             | 2.043                          | 376.04             | 768.22             |
| A_68_P25301154 | chr7:95279055-95279099                            | NM_001081414:546399     | Grm5       | INSIDE                 | 1.027                                                        | 1.437                          | 1700.77            | 2444.06            | 1.476                          | 1368.65            | 2019.52            |
| A_68_P29510250 | chr14:31989817-31989861                           | NM_022656:30174         | Nisch      | INSIDE                 | 1.027                                                        | 2.494                          | 2451.47            | 6113.60            | 2.561                          | 1754.26            | 4493.47            |
| A_68_P30636603 | chr16:29579592-29579636                           | NM_001199177:195        | Opal1      | INSIDE                 | 1.027                                                        | 1.518                          | 1031.24            | 1565.35            | 1.558                          | 833.61             | 1299.02            |
| A_68_P30346604 | chr15:76010482-76010526                           | NM_201394:15636         | Plec       | INSIDE                 | 1.027                                                        | 4.748                          | 1550.08            | 7360.37            | 4.877                          | 1184.22            | 5774.88            |
| A_68_P26815238 | chr9:108419578-108419622                          | NM_001114119:183        | Qrich1     | INSIDE                 | 1.027                                                        | 1.938                          | 7807.01            | 15130.27           | 1.990                          | 6392.04            | 12718.33           |
| A_68_P27277981 | chr10:79100167-79100211                           | NM_001024539:475        | Shc2       | INSIDE                 | 1.027                                                        | 0.527                          | 1308.34            | 689.71             | 0.541                          | 1099.81            | 595.21             |
| A_68_P27287001 | chr10:80494270-80494314                           | NM_134135:2365          | Slc39a3    | INSIDE                 | 1.027                                                        | 2.104                          | 748.31             | 1574.15            | 2.160                          | 627.41             | 1354.92            |
| A_68_P21303492 | chr2:68308957-68309001                            | NM_016866:1060          | Stk39      | INSIDE                 | 1.027                                                        | 1.759                          | 969.76             | 1705.49            | 1.805                          | 902.91             | 1630.02            |
| A_68_P25747456 | chr8:30329801-30329845                            | NM_153135:286           | Unc5d      | INSIDE                 | 1.027                                                        | 0.640                          | 1231.07            | 787.39             | 0.657                          | 995.09             | 653.57             |
| A_68_P27913323 | chr11:72609942-72609986                           | NM_001045536:237        | Zzef1      | INSIDE                 | 1.027                                                        | 1.574                          | 719.01             | 1132.08            | 1.616                          | 650.65             | 1051.67            |
| A_68_P24319038 | chr6:28165391-28165435                            | ENSMUST00000143099:-142 |            | PROMOTER               | 1.027                                                        | 2.278                          | 470.05             | 1070.56            | 2.339                          | 462.41             | 1081.67            |
| A_68_P32233086 | chrX:5659825-5659869                              | NM_00103321:692         | AU022751   |                        | 1.026                                                        | 2.302                          | 794.90             | 1830.10            | 2.362                          | 377.97             | 892.88             |
| A_68_P26478981 | chr9:46091218-46091262                            | NM_146000:146           | Bud13      | INSIDE                 | 1.026                                                        | 1.535                          | 2546.08            | 3907.83            | 1.575                          | 2083.47            | 3282.14            |
| A_68_P32289636 | chrX:20265804-20265848                            | NM_011049:208           | Cdk16      | INSIDE                 | 1.026                                                        | 2.864                          | 421.62             | 1207.52            | 2.940                          | 302.01             | 887.85             |
| A_68_P30478218 | chr15:98927458-98927502                           | NM_176835:-2434         | Dnajc22    | DIVERGENT_PROMOTER     | 1.026                                                        | 1.578                          | 1156.73            | 1825.76            | 1.620                          | 955.25             | 1547.19            |
| A_68_P27352992 | chr10:92773316-92773360                           | NM_013508:566           | Elk3       | INSIDE                 | 1.026                                                        | 2.203                          | 3554.40            | 7828.68            | 2.260                          | 2902.43            | 6558.71            |
| A_68_P23314728 | chr4:132478506-132478550                          | NM_001163792:-62        | Fam76a     | PROMOTER               | 1.026                                                        | 0.523                          | 1280.54            | 670.25             | 0.537                          | 1036.71            | 556.84             |
| A_68_P27190083 | chr10:62707080-62707124                           | NM_026101:558           | Herc4      | INSIDE                 | 1.026                                                        | 1.765                          | 677.61             | 1195.73            | 1.810                          | 589.06             | 1066.27            |
| A_68_P25951932 | chr8:72975857-72975901                            | NM_001122830:24964      | Klhl26     | INSIDE                 | 1.026                                                        | 2.361                          | 764.72             | 1805.58            | 2.422                          | 631.47             | 1529.65            |
| A_68_P31211857 | chr17:47506227-47506271                           | NM_183086:103           | Mrps10     | INSIDE                 | 1.026                                                        | 2.186                          | 1619.25            | 3539.48            | 2.244                          | 1374.76            | 3084.54            |
| A_68_P30346581 | chr15:76007523-76007567                           | NM_201394:18596         | Plec       | INSIDE                 | 1.026                                                        | 2.287                          | 801.30             | 1832.20            | 2.347                          | 674.74             | 1583.46            |
| A_68_P25471035 | chr7:128061434-128061478                          | NM_001164096:199        | Polr3e     | INSIDE                 | 1.026                                                        | 1.602                          | 527.68             | 845.45             | 1.644                          | 576.54             | 948.10             |
| A_68_P21820739 | chr2:164786459-164786503                          | NM_020333:-7007         | Slc12a5    | PROMOTER               | 1.026                                                        | 2.368                          | 619.14             | 1465.91            | 2.430                          | 599.66             | 1457.04            |
| A_68_P26876104 | chr9:120020031-120020078                          | NM_144793:538           | Slc25a38   | INSIDE                 | 1.026                                                        | 2.314                          | 1098.90            | 2542.73            | 2.373                          | 861.23             | 2043.90            |
| A_68_P27942761 | chr11:78156911-78156955                           | NM_011676:-91           | Unc119     | PROMOTER               | 1.026                                                        | 2.187                          | 402.10             | 879.19             | 2.243                          | 358.93             | 805.03             |
| A_68_P31879481 | chr18:83126670-83126714                           | NM_001177464:42669      | Zfp516     | INSIDE                 | 1.026                                                        | 2.442                          | 969.19             | 2366.47            | 2.504                          | 806.05             | 2018.55            |
| A_68_P26749717 | chr9:96789706-96789750                            | NM_153420:113           | Acp12      | INSIDE                 | 1.025                                                        | 0.604                          | 3115.70            | 1882.41            | 0.619                          | 2338.69            | 1447.60            |
| A_68_P32769556 | chrX:154481512-154481556                          | NM_177751:-492          | Cnksr2     | PROMOTER               | 1.025                                                        | 3.574                          | 639.33             | 2284.70            | 3.664                          | 381.93             | 1399.59            |
| A_68_P20870811 | chr1:181476719-181476763                          | NM_146105:81            | Cnst       | INSIDE                 | 1.025                                                        | 2.397                          | 742.11             | 1778.92            | 2.456                          | 670.12             | 1646.15            |
| A_68_P29257121 | chr13:99124384-99124428                           | NM_008242:207           | Foxd1      | INSIDE                 | 1.025                                                        | 1.950                          | 1538.04            | 2999.29            | 1.999                          | 1137.47            | 2273.92            |
| A_68_P24451816 | chr6:52590190-52590234                            | NM_145567:82            | Hibadh     | INSIDE                 | 1.025                                                        | 0.427                          | 1427.75            | 609.72             | 0.438                          | 1318.86            | 577.21             |
| A_68_P21717108 | chr2:146049089-146049133                          | NM_016889:1378          | Insm1      | INSIDE                 | 1.025                                                        | 0.527                          | 2024.34            | 1066.68            | 0.540                          | 1592.62            | 860.26             |
| A_68_P32281774 | chrX:17738988-17739032                            | NM_009483:-782          | Kdm6a      | PROMOTER               | 1.025                                                        | 0.463                          | 1210.69            | 560.30             | 0.474                          | 635.66             | 301.50             |
| A_68_P21080307 | chr2:26517162-26517206                            | NM_010695:9618          | Len4       | DOWNSTREAM             | 1.025                                                        | 2.560                          | 1240.57            | 3175.65            | 2.623                          | 1124.59            | 2949.77            |
| A_68_P24045146 | chr5:121995041-121995098                          | NM_010765:832           | Mapkapk5   | INSIDE                 | 1.025                                                        | 2.178                          | 464.60             | 1012.04            | 2.233                          | 450.66             | 1006.30            |
| A_68_P26313303 | chr9:135539601-13554004                           | NM_023858:358           | Mtmr2      | INSIDE                 | 1.025                                                        | 0.532                          | 1192.30            | 634.45             | 0.546                          | 986.86             | 538.38             |
| A_68_P21842271 | chr2:168396389-168396433                          | NM_001136073:19281      | Nfiate2    | INSIDE                 | 1.025                                                        | 3.087                          | 2554.74            | 7885.31            | 3.164                          | 2163.59            | 6845.88            |
| A_68_P26400213 | chr9:31193594-31193638                            | NM_172766:-160          | Nfrikb     | PROMOTER               | 1.025                                                        | 0.444                          | 1532.71            | 681.01             | 0.455                          | 1276.68            | 581.26             |
| A_68_P28185532 | chr11:120459254-120459298                         | NM_011568:403           | Thoc4      | INSIDE                 | 1.025                                                        | 1.576                          | 822.59             | 1296.05            | 1.614                          | 755.28             | 1219.32            |
| A_68_P30484946 | chr15:100111437-100111481                         | NM_183109:191           | Tmprss12   | INSIDE                 | 1.025                                                        | 2.275                          | 1109.55            | 2523.83            | 2.332                          | 902.42             | 2104.41            |
| A_68_P28013351 | chr11:90548942-90548986                           | NM_028011:-49           | Tom111     | PROMOTER               | 1.025                                                        | 1.749                          | 1225.06            | 2142.89            | 1.794                          | 1077.29            | 1932.23            |
| A_68_P21476822 | chr2:102240840-102240884                          | NM_020267:195           | Trim44     | INSIDE                 | 1.025                                                        | 2.329                          | 538.38             | 1253.89            | 2.386                          | 533.37             | 1272.82            |
| A_68_P26699327 | chr9:86358534-86358578                            | NM_027394:-33           | Ube2ebp    | DIVERGENT_PROMOTER     | 1.025                                                        | 1.970                          | 1186.50            | 2337.17            | 2.020                          | 1008.33            | 2036.52            |



| ProbeName      | Target position of probe on CpG island microarray | TargetID                | GeneSymbol | CpG island Description | Ratio of relative methylation (TiO <sub>2</sub> -NP/Vehicle) | Sham group                     |                    |                    | TiO <sub>2</sub> -H group      |                    |                    |
|----------------|---------------------------------------------------|-------------------------|------------|------------------------|--------------------------------------------------------------|--------------------------------|--------------------|--------------------|--------------------------------|--------------------|--------------------|
|                |                                                   |                         |            |                        |                                                              | Relative methylation (Cy5/Cy3) | Cy3 signal (Input) | Cy5 signal (MeDIP) | Relative methylation (Cy5/Cy3) | Cy3 signal (Input) | Cy5 signal (MeDIP) |
| A_68_P30568844 | chr16:16303089-16303133                           | NM_198246:53            | Yars2      | INSIDE                 | 1.025                                                        | 2.030                          | 597.55             | 1213.15            | 2.081                          | 551.38             | 1147.44            |
| A_68_P26335718 | chr9:17902323-17902375                            |                         |            | Unknown                | 1.025                                                        | 2.554                          | 670.70             | 1712.81            | 2.617                          | 610.72             | 1598.02            |
| A_68_P25032016 | chr7:31319911-31319955                            | NM_178252:96            | Arhgap33   | INSIDE                 | 1.024                                                        | 0.503                          | 4569.67            | 2299.00            | 0.515                          | 3116.57            | 1605.22            |
| A_68_P24758532 | chr6:113232291-113232335                          | NM_170673:12            | Cpne9      | INSIDE                 | 1.024                                                        | 3.063                          | 1063.33            | 3257.38            | 3.138                          | 931.86             | 2924.51            |
| A_68_P25952211 | chr8:73017252-73017296                            | NM_018827:220           | Crtfl      | INSIDE                 | 1.024                                                        | 1.760                          | 958.09             | 1686.29            | 1.802                          | 809.04             | 1457.87            |
| A_68_P30964443 | chr16:91688927-91688971                           | NM_021720:25            | Donson     | INSIDE                 | 1.024                                                        | 1.674                          | 976.54             | 1634.92            | 1.714                          | 838.75             | 1437.66            |
| A_68_P24295389 | chr6:23198493-23198537                            | NM_028462:-250          | Fezf1      | PROMOTER               | 1.024                                                        | 1.744                          | 1782.75            | 3108.58            | 1.786                          | 1553.11            | 2774.09            |
| A_68_P23190570 | chr4:107108505-107108549                          | NM_147221:1203          | Glis1      | INSIDE                 | 1.024                                                        | 1.676                          | 717.73             | 1202.66            | 1.715                          | 719.66             | 1234.45            |
| A_68_P27289052 | chr10:80813045-80813089                           | NM_001163165:105        | Hmg20b     | INSIDE                 | 1.024                                                        | 0.441                          | 1373.11            | 606.19             | 0.452                          | 1150.76            | 520.41             |
| A_68_P27288649 | chr10:80755618-80755662                           | NM_001146687:-76        | Pip5k1c    | DIVERGENT_PROMOTER     | 1.024                                                        | 3.049                          | 918.73             | 2801.60            | 3.123                          | 855.35             | 2671.26            |
| A_68_P21784244 | chr2:158493590-158493634                          | NM_001159662:742        | Ppp1r16b   | INSIDE                 | 1.024                                                        | 1.652                          | 786.31             | 1299.15            | 1.692                          | 677.23             | 1146.21            |
| A_68_P32066440 | chr19:31838752-31838796                           | NM_001013833:749        | Prkg1      | INSIDE                 | 1.024                                                        | 1.417                          | 1912.14            | 2709.03            | 1.450                          | 1645.24            | 2385.95            |
| A_68_P27950228 | chr11:79474495-79474539                           | NM_175543:69803         | Rab11fip4  | INSIDE                 | 1.024                                                        | 2.273                          | 633.82             | 1440.51            | 2.328                          | 563.80             | 1312.67            |
| A_68_P28325481 | chr12:31058300-31058344                           | NM_172951:-82           | Sntg2      | PROMOTER               | 1.024                                                        | 1.787                          | 11660.29           | 20842.30           | 1.830                          | 8641.24            | 15812.10           |
| A_68_P24444652 | chr6:51473918-51473962                            | NM_001127349:39         | Snx10      | INSIDE                 | 1.024                                                        | 1.786                          | 1187.00            | 2120.55            | 1.829                          | 997.31             | 1823.87            |
| A_68_P20946919 | chr1:194861703-194861747                          | NM_181546:168           | Syt14      | INSIDE                 | 1.024                                                        | 1.506                          | 2431.84            | 3661.40            | 1.541                          | 2025.70            | 3121.60            |
| A_68_P32147459 | chr19:47142283-47142327                           | NM_177342:67            | Taf5       | INSIDE                 | 1.024                                                        | 2.082                          | 628.45             | 1308.67            | 2.133                          | 529.81             | 1130.04            |
| A_68_P32114047 | chr19:41338628-41338672                           | NM_133352:-156          | Tm9sf3     | PROMOTER               | 1.024                                                        | 1.671                          | 514.03             | 858.99             | 1.712                          | 485.70             | 831.46             |
| A_68_P23409802 | chr4:150431872-150431916                          | NM_009498:168           | Vamp3      | INSIDE                 | 1.024                                                        | 3.257                          | 538.28             | 1753.27            | 3.334                          | 532.25             | 1774.42            |
| A_68_P30446389 | chr15:93167185-93167229                           | NM_024189:160           | Yaf2       | INSIDE                 | 1.024                                                        | 2.908                          | 664.21             | 1931.51            | 2.979                          | 706.23             | 2103.81            |
| A_68_P23591264 | chr5:34162817-34162861                            | ENSMUST00000075812:-535 |            | PROMOTER               | 1.024                                                        | 2.351                          | 611.03             | 1436.53            | 2.407                          | 634.60             | 1527.66            |
| A_68_P24197924 | chr6:3151637-3151681                              | ENSMUST00000158475:442  |            | DOWNSTREAM             | 1.024                                                        | 3.131                          | 1179.43            | 3692.58            | 3.206                          | 902.62             | 2893.64            |
| A_68_P32362519 | chrX:45387638-45387682                            | NM_013912:369           | Apln       | INSIDE                 | 1.023                                                        | 2.283                          | 2640.04            | 6026.68            | 2.336                          | 1375.86            | 3214.14            |
| A_68_P23295632 | chr4:128901619-128901663                          | NM_001033189:24047      | C77080     | INSIDE                 | 1.023                                                        | 1.562                          | 1033.23            | 1613.46            | 1.598                          | 826.12             | 1320.32            |
| A_68_P27172912 | chr10:59648749-59648793                           | NM_016803:33238         | Chst3      | INSIDE                 | 1.023                                                        | 2.004                          | 2010.02            | 4028.20            | 2.050                          | 1746.71            | 3580.00            |
| A_68_P27995153 | chr11:87431204-87431248                           | NM_001045527:561        | Hsf5       | INSIDE                 | 1.023                                                        | 2.076                          | 1308.97            | 2716.89            | 2.124                          | 921.70             | 1957.46            |
| A_68_P31156853 | chr17:35115138-35115182                           | NM_013558:5513          | Hspal1     | INSIDE                 | 1.023                                                        | 2.745                          | 593.03             | 1628.04            | 2.809                          | 522.76             | 1468.56            |
| A_68_P30350209 | chr15:76552567-76552611                           | NM_198119:15            | Lrre24     | INSIDE                 | 1.023                                                        | 0.520                          | 1141.47            | 593.08             | 0.532                          | 895.77             | 476.12             |
| A_68_P30339720 | chr15:74630372-74630416                           | NM_029627:4             | Ly6k       | INSIDE                 | 1.023                                                        | 3.400                          | 904.03             | 3073.26            | 3.479                          | 750.71             | 2612.02            |
| A_68_P24135186 | chr5:139848163-139848207                          | NR_029768:-2485         | Mir339     | DIVERGENT_PROMOTER     | 1.023                                                        | 0.628                          | 1396.32            | 876.46             | 0.642                          | 1192.55            | 765.78             |
| A_68_P29263992 | chr13:100286417-100286461                         | NM_008634:119           | Mtap1b     | INSIDE                 | 1.023                                                        | 2.087                          | 1145.37            | 2390.55            | 2.135                          | 985.53             | 2103.78            |
| A_68_P32218818 | chr19:59419895-59419939                           | NM_001033222:354        | Pdzd8      | INSIDE                 | 1.023                                                        | 2.667                          | 901.00             | 2402.85            | 2.729                          | 836.30             | 2281.91            |
| A_68_P21765151 | chr2:155183097-155183141                          | NM_001004721:42         | Pigu       | INSIDE                 | 1.023                                                        | 2.182                          | 1897.17            | 4139.78            | 2.232                          | 1561.28            | 3484.34            |
| A_68_P28314232 | chr12:29320359-29320403                           | NM_011300:438           | Rps7       | INSIDE                 | 1.023                                                        | 1.618                          | 766.41             | 1239.93            | 1.656                          | 698.92             | 1157.19            |
| A_68_P26346144 | chr9:21048991-21049035                            | NM_053190:3875          | S1pr5      | INSIDE                 | 1.023                                                        | 0.377                          | 2938.41            | 1107.13            | 0.385                          | 2326.68            | 896.81             |
| A_68_P22523678 | chr3:129763488-129763532                          | NM_207209:315           | Sec24b     | INSIDE                 | 1.023                                                        | 3.911                          | 228.74             | 894.54             | 4.000                          | 298.89             | 1195.53            |
| A_68_P23364646 | chr4:141093876-141093920                          | NM_019763:614           | Spen       | INSIDE                 | 1.023                                                        | 2.693                          | 357.16             | 961.65             | 2.754                          | 375.58             | 1034.38            |
| A_68_P30230210 | chr15:54903527-54903571                           | NM_001081288:159        | Taf2       | INSIDE                 | 1.023                                                        | 1.421                          | 1168.33            | 1660.71            | 1.454                          | 907.72             | 1320.09            |
| A_68_P24874567 | chr6:136765429-136765473                          | NM_021714:11287         | Wbp11      | INSIDE                 | 1.023                                                        | 1.744                          | 1602.22            | 2794.05            | 1.785                          | 1361.23            | 2429.36            |
| A_68_P20305039 | chr1:66909588-66909632                            | NM_007381:231           | Aeadl      | INSIDE                 | 1.022                                                        | 2.083                          | 775.59             | 1615.21            | 2.128                          | 729.79             | 1553.21            |
| A_68_P30338800 | chr15:74502963-74503007                           | NM_018790:16            | Arc        | INSIDE                 | 1.022                                                        | 0.564                          | 2107.27            | 1189.10            | 0.577                          | 1601.99            | 924.05             |
| A_68_P24011285 | chr5:116182026-116182070                          | NM_001080808:-480       | Cecdc64    | PROMOTER               | 1.022                                                        | 1.838                          | 744.45             | 1368.58            | 1.878                          | 694.82             | 1305.21            |
| A_68_P20829087 | chr1:173609897-173609941                          | NM_007649:-2267         | Cd48       | PROMOTER               | 1.022                                                        | 2.030                          | 951.66             | 1931.77            | 2.076                          | 754.70             | 1566.40            |
| A_68_P28672821 | chr12:100139294-100139338                         | NM_001081191:378        | Emf5       | INSIDE                 | 1.022                                                        | 1.885                          | 1262.34            | 2379.11            | 1.926                          | 1135.88            | 2187.85            |
| A_68_P27534775 | chr10:126676335-126676379                         | NM_001039000:24063      | Kif5a      | INSIDE                 | 1.022                                                        | 1.997                          | 980.39             | 1957.75            | 2.041                          | 769.83             | 1570.90            |
| A_68_P32148598 | chr19:47327938-47327982                           | NM_001163480:24628      | Neurl1a    | INSIDE                 | 1.022                                                        | 3.550                          | 330.76             | 1174.16            | 3.626                          | 273.57             | 992.00             |
| A_68_P22878716 | chr4:44725913-44725957                            | NM_008782:-2622         | Pax5       | PROMOTER               | 1.022                                                        | 0.413                          | 1857.96            | 766.86             | 0.422                          | 1444.18            | 609.07             |
| A_68_P26815232 | chr9:108418960-108419004                          | NM_001114119:-435       | Qrich1     | PROMOTER               | 1.022                                                        | 2.148                          | 2467.90            | 5301.53            | 2.195                          | 1856.56            | 4074.34            |
| A_68_P25669975 | chr8:13677504-13677548                            | NM_009025:61            | Rasa3      | INSIDE                 | 1.022                                                        | 0.549                          | 1636.73            | 898.26             | 0.561                          | 1411.62            | 791.60             |
| A_68_P25989168 | chr8:81033011-81033055                            | NM_029736:-201          | Slc10a7    | DIVERGENT_PROMOTER     | 1.022                                                        | 0.617                          | 1545.93            | 954.29             | 0.631                          | 1180.52            | 744.77             |
| A_68_P27682721 | chr11:31270001-31270045                           | NM_011491:39            | Ste2       | INSIDE                 | 1.022                                                        | 1.666                          | 1754.05            | 2922.98            | 1.704                          | 1305.15            | 2223.57            |

| ProbeName      | Target position of probe on CpG island microarray | TargetID           | GeneSymbol    | CpG island Description | Ratio of relative methylation (TiO <sub>2</sub> -NP/Vehicle) | Sham group                     |                    |                    | TiO <sub>2</sub> -H group      |                    |                    |
|----------------|---------------------------------------------------|--------------------|---------------|------------------------|--------------------------------------------------------------|--------------------------------|--------------------|--------------------|--------------------------------|--------------------|--------------------|
|                |                                                   |                    |               |                        |                                                              | Relative methylation (Cy5/Cy3) | Cy3 signal (Input) | Cy5 signal (MeDIP) | Relative methylation (Cy5/Cy3) | Cy3 signal (Input) | Cy5 signal (MeDIP) |
| A_68_P26710363 | chr9:88377377-88377421                            | NM_019796:-163     | Syncrip       | PROMOTER               | 1.022                                                        | 1.617                          | 1014.18            | 1640.33            | 1.653                          | 849.59             | 1404.27            |
| A_68_P31023472 | chr17:7165401-7165445                             | NM_147155:83       | Tagap1        | INSIDE                 | 1.022                                                        | 0.631                          | 1034.27            | 652.39             | 0.645                          | 938.77             | 605.23             |
| A_68_P22894263 | chr4:47366193-47366237                            | NM_009370:38       | Tgfb1         | INSIDE                 | 1.022                                                        | 0.436                          | 1812.93            | 790.28             | 0.445                          | 1688.42            | 752.15             |
| A_68_P20620973 | chr1:134257439-134257483                          | NM_178874:30398    | Tmcc2         | INSIDE                 | 1.022                                                        | 5.315                          | 2714.33            | 14425.84           | 5.429                          | 1737.92            | 9435.27            |
| A_68_P25615130 | chr8:3679220-3679265                              | NM_025701:2766     | Trappe5       | INSIDE                 | 1.022                                                        | 4.629                          | 1951.75            | 9033.75            | 4.730                          | 1661.71            | 7859.64            |
| A_68_P27850825 | chr11:61668376-61668420                           | NM_013881:196      | Ulk2          | INSIDE                 | 1.022                                                        | 2.009                          | 466.65             | 937.38             | 2.052                          | 487.87             | 1001.29            |
| A_68_P25505249 | chr7:134486849-134486893                          | NM_146202:1958     | Zfp768        | INSIDE                 | 1.022                                                        | 1.800                          | 1009.04            | 1816.27            | 1.839                          | 713.76             | 1312.88            |
| A_68_P31219172 | chr17:48925673-48925717                           |                    |               | Unknown                | 1.022                                                        | 3.770                          | 1278.87            | 4820.77            | 3.853                          | 939.74             | 3621.19            |
| A_68_P25354924 | chr7:105457494-105457538                          | NM_025408:521      | Acer3         | INSIDE                 | 1.021                                                        | 1.431                          | 1908.32            | 2730.38            | 1.461                          | 1415.53            | 2068.19            |
| A_68_P31152214 | chr17:34256524-34256568                           | NR_037970:299      | Brd2          | INSIDE                 | 1.021                                                        | 1.500                          | 1232.66            | 1849.54            | 1.532                          | 994.53             | 1523.14            |
| A_68_P31676223 | chr18:46471587-46471631                           | NM_001160399:-26   | Ccdc112       | PROMOTER               | 1.021                                                        | 2.183                          | 2824.92            | 6165.53            | 2.229                          | 2178.65            | 4855.79            |
| A_68_P25578900 | chr7:146768561-146768605                          | NR_027857:114      | Nkx6-2        | INSIDE                 | 1.021                                                        | 2.125                          | 841.90             | 1789.21            | 2.169                          | 681.78             | 1478.80            |
| A_68_P29237596 | chr13:95653350-95653394                           | NM_011021:7791     | Otp           | INSIDE                 | 1.021                                                        | 2.595                          | 1338.12            | 3471.96            | 2.649                          | 1169.82            | 3098.28            |
| A_68_P30422817 | chr15:88890519-88890563                           | NM_001002005:385   | Panx2         | INSIDE                 | 1.021                                                        | 2.000                          | 586.15             | 1172.43            | 2.041                          | 638.26             | 1302.89            |
| A_68_P29518733 | chr14:33411046-33411090                           | NM_001001796:-2044 | Prrx1         | PROMOTER               | 1.021                                                        | 1.564                          | 1602.67            | 2505.86            | 1.597                          | 1446.97            | 2310.76            |
| A_68_P24618288 | chr6:87762030-87762074                            | NM_001039394:-279  | Rab43         | PROMOTER               | 1.021                                                        | 2.506                          | 16931.45           | 42428.15           | 2.559                          | 10823.86           | 27701.08           |
| A_68_P25370036 | chr7:108011436-108011480                          | NM_177073:469      | Relt          | INSIDE                 | 1.021                                                        | 0.423                          | 1289.14            | 545.59             | 0.432                          | 1047.76            | 452.94             |
| A_68_P24155044 | chr5:143874288-143874332                          | NM_080561:389      | Rnf216        | INSIDE                 | 1.021                                                        | 2.000                          | 707.15             | 1414.39            | 2.043                          | 652.90             | 1333.75            |
| A_68_P27340133 | chr10:90586197-90586241                           | NM_133668:490      | Ste25a3       | INSIDE                 | 1.021                                                        | 1.459                          | 820.30             | 1196.64            | 1.489                          | 757.39             | 1127.91            |
| A_68_P23570613 | chr5:30400253-30400312                            | NM_021288:-117     | Tyms          | PROMOTER               | 1.021                                                        | 4.723                          | 264.46             | 1249.07            | 4.821                          | 294.08             | 1417.62            |
| A_68_P28178429 | chr11:119385860-119385904                         |                    |               | Unknown                | 1.021                                                        | 2.305                          | 928.70             | 2140.93            | 2.353                          | 928.24             | 2184.23            |
| A_68_P29509887 | chr14:31944357-31944401                           | NR_024069:-2262    | 2010107H07Rik | DIVERGENT_PROMOTER     | 1.020                                                        | 0.477                          | 1480.76            | 706.82             | 0.487                          | 1415.77            | 689.47             |
| A_68_P20977349 | chr2:6021517-6021561                              | NM_001159657:29693 | 5430407P10Rik | INSIDE                 | 1.020                                                        | 2.215                          | 739.59             | 1638.06            | 2.258                          | 685.79             | 1548.66            |
| A_68_P26362426 | chr9:24307746-24307790                            | NM_172920:-184     | Dpy19l1       | PROMOTER               | 1.020                                                        | 3.375                          | 194.09             | 655.01             | 3.441                          | 187.45             | 645.09             |
| A_68_P28728198 | chr12:109701817-109701861                         | NM_001043335:40813 | Eml1          | INSIDE                 | 1.020                                                        | 2.002                          | 616.84             | 1234.94            | 2.042                          | 469.66             | 958.84             |
| A_68_P23235082 | chr4:117222946-117222990                          | NM_080469:-130     | Eri3          | PROMOTER               | 1.020                                                        | 2.103                          | 1053.77            | 2216.36            | 2.145                          | 981.45             | 2104.96            |
| A_68_P27503063 | chr10:120802153-120802197                         | NM_029364:29       | Gns           | INSIDE                 | 1.020                                                        | 0.450                          | 2215.37            | 997.29             | 0.459                          | 1951.91            | 896.60             |
| A_68_P31730289 | chr18:56591860-56591904                           | NM_026240:97       | Gramd3        | INSIDE                 | 1.020                                                        | 2.011                          | 1369.11            | 2753.57            | 2.051                          | 1277.02            | 2619.72            |
| A_68_P27568544 | chr11:6344567-6344611                             | NM_029938:-142     | H2afv         | PROMOTER               | 1.020                                                        | 0.607                          | 1227.61            | 745.36             | 0.619                          | 945.58             | 585.77             |
| A_68_P28103517 | chr11:106649497-106649541                         | NR_037224:-5445    | Mir3064       | PROMOTER               | 1.020                                                        | 0.545                          | 1238.11            | 674.83             | 0.556                          | 953.12             | 529.81             |
| A_68_P30456842 | chr15:95059493-95059537                           | NM_016743:299623   | Nell2         | INSIDE                 | 1.020                                                        | 2.582                          | 638.71             | 1649.12            | 2.633                          | 579.90             | 1526.61            |
| A_68_P26345840 | chr9:20986196-20986240                            | NM_183408:16061    | Pde4a         | INSIDE                 | 1.020                                                        | 0.475                          | 1150.47            | 546.32             | 0.484                          | 948.82             | 459.62             |
| A_68_P26138375 | chr8:108734930-108734974                          | NM_145404:-1       | Prmt7         | DIVERGENT_PROMOTER     | 1.020                                                        | 1.695                          | 2048.09            | 3470.53            | 1.728                          | 1800.77            | 3112.18            |
| A_68_P31121838 | chr17:28466106-28466150                           | NM_011287:713      | Rpl10a        | INSIDE                 | 1.020                                                        | 2.448                          | 890.67             | 2180.77            | 2.496                          | 829.73             | 2071.29            |
| A_68_P31052340 | chr17:12700162-12700206                           | NM_011395:386      | Ste22a3       | INSIDE                 | 1.020                                                        | 0.594                          | 1901.85            | 1129.57            | 0.606                          | 1524.43            | 923.15             |
| A_68_P22477034 | chr3:121235139-121235183                          | NM_145394:102      | Ste44a3       | INSIDE                 | 1.020                                                        | 1.802                          | 889.15             | 1602.51            | 1.839                          | 788.96             | 1451.00            |
| A_68_P22314617 | chr3:88383670-88383714                            | NM_025448:100      | Ssr2          | INSIDE                 | 1.020                                                        | 1.438                          | 1292.82            | 1859.69            | 1.467                          | 1187.67            | 1742.19            |
| A_68_P31846341 | chr18:77424704-77424748                           | NM_013666:141      | St8sia5       | INSIDE                 | 1.020                                                        | 1.891                          | 1384.89            | 2619.23            | 1.930                          | 1245.02            | 2402.77            |
| A_68_P25102013 | chr7:54175369-54175413                            | NM_021884:-90      | Tsg101        | PROMOTER               | 1.020                                                        | 1.822                          | 757.12             | 1379.50            | 1.858                          | 780.55             | 1450.46            |
| A_68_P28344355 | chr12:34642855-34642899                           | NM_011658:341      | Twist1        | INSIDE                 | 1.020                                                        | 2.068                          | 623.88             | 1290.22            | 2.108                          | 634.56             | 1337.93            |
| A_68_P23576666 | chr5:31440580-31440624                            | NM_021290:666      | Ucn           | INSIDE                 | 1.020                                                        | 1.614                          | 535.03             | 863.51             | 1.646                          | 540.28             | 889.50             |
| A_68_P31926824 | chr19:5088863-5088907                             | NM_026553:347      | Yif1a         | INSIDE                 | 1.020                                                        | 1.689                          | 1402.00            | 2367.45            | 1.723                          | 1228.88            | 2117.32            |
| A_68_P24057005 | chr5:124134134-124134178                          | NM_019765:144      | Clip1         | INSIDE                 | 1.019                                                        | 1.432                          | 958.82             | 1373.43            | 1.460                          | 789.24             | 1152.39            |
| A_68_P25564251 | chr7:144390467-144390511                          | NM_00113414:115640 | Ebf3          | INSIDE                 | 1.019                                                        | 3.218                          | 2651.42            | 8531.69            | 3.278                          | 1957.18            | 6416.54            |
| A_68_P23270865 | chr4:124562969-124563014                          | NM_177671:3963     | Epha10        | INSIDE                 | 1.019                                                        | 2.145                          | 554.25             | 1188.79            | 2.186                          | 504.52             | 1103.07            |
| A_68_P26134296 | chr8:108042857-108042901                          | NM_008289:233      | Hsd11b2       | INSIDE                 | 1.019                                                        | 2.457                          | 648.37             | 1593.00            | 2.503                          | 574.47             | 1437.86            |
| A_68_P22397063 | chr3:105255456-105255500                          | NM_019931:-6255    | Kend3         | PROMOTER               | 1.019                                                        | 0.387                          | 1741.27            | 674.03             | 0.394                          | 1388.21            | 547.61             |
| A_68_P25991119 | chr8:81344708-81344752                            | NM_001191004:321   | Lsm6          | INSIDE                 | 1.019                                                        | 1.745                          | 1208.81            | 2108.85            | 1.777                          | 1009.64            | 1794.12            |
| A_68_P27787504 | chr11:50050408-50050452                           | NM_008521:1543     | Ltc4s         | INSIDE                 | 1.019                                                        | 1.655                          | 1603.64            | 2653.39            | 1.686                          | 1361.70            | 2295.41            |
| A_68_P31934086 | chr19:6341582-6341626                             | NM_009006:355      | Map4k2        | INSIDE                 | 1.019                                                        | 1.587                          | 936.29             | 1486.19            | 1.617                          | 812.32             | 1313.93            |
| A_68_P27796190 | chr11:51671242-51671287                           | NM_199299:-281     | Phf15         | PROMOTER               | 1.019                                                        | 3.109                          | 446.27             | 1387.51            | 3.168                          | 359.05             | 1137.33            |

| ProbeName      | Target position of probe on CpG island microarray | TargetID               | GeneSymbol    | CpG island Description | Ratio of relative methylation (TiO <sub>2</sub> -NP/Vehicle) | Sham group                     |                    |                    | TiO <sub>2</sub> -H group      |                    |                    |
|----------------|---------------------------------------------------|------------------------|---------------|------------------------|--------------------------------------------------------------|--------------------------------|--------------------|--------------------|--------------------------------|--------------------|--------------------|
|                |                                                   |                        |               |                        |                                                              | Relative methylation (Cy5/Cy3) | Cy3 signal (Input) | Cy5 signal (MeDIP) | Relative methylation (Cy5/Cy3) | Cy3 signal (Input) | Cy5 signal (MeDIP) |
| A_68_P25988753 | chr8:80961280-80961324                            | NM_138944:751          | Pou4f2        | PROMOTER               | 1.019                                                        | 4.509                          | 2900.66            | 13080.03           | 4.593                          | 2072.27            | 9518.50            |
| A_68_P21834481 | chr2:167065786-167065830                          | NM_008968:229          | Ptgis         | INSIDE                 | 1.019                                                        | 0.384                          | 1726.09            | 662.74             | 0.391                          | 1416.61            | 554.37             |
| A_68_P29050814 | chr13:54788639-54788683                           | NM_001146025:509       | Rnf44         | INSIDE                 | 1.019                                                        | 2.736                          | 1084.01            | 2965.45            | 2.789                          | 783.01             | 2183.69            |
| A_68_P31256955 | chr17:56705842-56705886                           | NM_001029979:18142     | Safb2         | INSIDE                 | 1.019                                                        | 1.925                          | 1834.39            | 3531.08            | 1.961                          | 1461.14            | 2865.45            |
| A_68_P27280661 | chr10:79520418-79520462                           | NM_183426:45007        | Sbno2         | INSIDE                 | 1.019                                                        | 1.509                          | 1079.23            | 1628.19            | 1.537                          | 847.31             | 1302.73            |
| A_68_P32136769 | chr19:45224972-45225016                           | NM_021901:-210         | Ttk1          | PROMOTER               | 1.019                                                        | 0.630                          | 1171.63            | 738.08             | 0.642                          | 1055.56            | 677.73             |
| A_68_P25272788 | chr7:88716073-88716117                            | NM_001004185:-83       | Whamm         | DIVERGENT_PROMOTER     | 1.019                                                        | 3.711                          | 761.27             | 2825.20            | 3.780                          | 706.19             | 2669.66            |
| A_68_P28104776 | chr11:106889479-106889523                         | NM_001163473:-36       | 1810010H24Rik | PROMOTER               | 1.018                                                        | 2.485                          | 350.78             | 871.55             | 2.529                          | 343.57             | 868.95             |
| A_68_P28050940 | chr11:97361543-97361587                           | NM_021493:50091        | Arhgap23      | INSIDE                 | 1.018                                                        | 2.543                          | 1212.72            | 3084.07            | 2.588                          | 1056.17            | 2733.61            |
| A_68_P31616439 | chr18:35278605-35278649                           | NM_009818:61           | Ctnna1        | INSIDE                 | 1.018                                                        | 0.554                          | 1713.40            | 948.65             | 0.563                          | 1351.12            | 761.35             |
| A_68_P25083585 | chr7:50932262-50932306                            | NM_145582:4884         | Ctu1          | INSIDE                 | 1.018                                                        | 2.581                          | 787.80             | 2033.08            | 2.627                          | 739.20             | 1941.94            |
| A_68_P31933640 | chr19:6277337-6277381                             | NM_010119:463          | Ehd1          | INSIDE                 | 1.018                                                        | 0.512                          | 1828.20            | 935.72             | 0.521                          | 1528.88            | 796.26             |
| A_68_P22737304 | chr4:12834151-12834195                            | NM_001171801:189       | Gm11818       | INSIDE                 | 1.018                                                        | 2.482                          | 519.50             | 1289.49            | 2.527                          | 498.95             | 1260.72            |
| A_68_P32571133 | chrX:100129283-100129327                          | NR_026596:258          | Gm5126        | INSIDE                 | 1.018                                                        | 1.708                          | 811.88             | 1386.57            | 1.739                          | 476.40             | 828.52             |
| A_68_P23355140 | chr4:139521655-139521700                          | NM_173427:2264         | Klhdc7a       | INSIDE                 | 1.018                                                        | 3.061                          | 1402.90            | 4294.47            | 3.115                          | 1090.17            | 3396.27            |
| A_68_P25087546 | chr7:51717127-51717171                            | NM_198250:19292        | Lrrc4b        | INSIDE                 | 1.018                                                        | 1.630                          | 1109.24            | 1808.35            | 1.659                          | 978.40             | 1623.26            |
| A_68_P21842275 | chr2:168396762-168396807                          | NM_001136073:18907     | Nfate2        | INSIDE                 | 1.018                                                        | 2.770                          | 762.29             | 2111.55            | 2.819                          | 649.90             | 1832.23            |
| A_68_P22309971 | chr3:87587854-87587898                            | NM_001033124:11208     | Ntrk1         | INSIDE                 | 1.018                                                        | 2.081                          | 936.35             | 1948.86            | 2.118                          | 789.74             | 1672.89            |
| A_68_P24636899 | chr6:91066454-91066498                            | NM_018815:344          | Nup210        | INSIDE                 | 1.018                                                        | 1.547                          | 926.76             | 1433.54            | 1.575                          | 746.26             | 1175.41            |
| A_68_P31229018 | chr17:50648295-50648339                           | NM_013880:-555         | Picl2         | PROMOTER               | 1.018                                                        | 2.163                          | 537.99             | 1163.90            | 2.203                          | 566.54             | 1248.21            |
| A_68_P24117608 | chr5:136209662-136209706                          | NM_008898:44601        | Por           | INSIDE                 | 1.018                                                        | 3.740                          | 3233.32            | 12093.06           | 3.808                          | 2181.72            | 8308.72            |
| A_68_P23298637 | chr4:129497229-129497273                          | NM_008974:-472         | Ptp4a2        | PROMOTER               | 1.018                                                        | 2.011                          | 1478.98            | 2974.61            | 2.048                          | 1235.54            | 2530.55            |
| A_68_P27926514 | chr11:75323805-75323849                           | NM_001029938:231       | Rilp          | INSIDE                 | 1.018                                                        | 3.142                          | 647.09             | 2032.91            | 3.197                          | 585.68             | 1872.45            |
| A_68_P23339118 | chr4:136852527-136852571                          | NM_009523:18999        | Wnt4          | INSIDE                 | 1.018                                                        | 1.855                          | 472.09             | 875.67             | 1.888                          | 419.03             | 790.93             |
| A_68_P29235876 | chr13:95365929-95365973                           |                        | Unknown       |                        | 1.018                                                        | 2.202                          | 920.47             | 2026.61            | 2.242                          | 830.88             | 1862.54            |
| A_68_P30711910 | chr16:42875216-42875260                           | ENSMUST00000172270:462 |               | INSIDE                 | 1.018                                                        | 1.734                          | 1375.71            | 2386.15            | 1.765                          | 1192.57            | 2105.32            |
| A_68_P25352335 | chr7:104937048-104937092                          | ENSMUST00000172423:20  |               | INSIDE                 | 1.018                                                        | 0.657                          | 1925.05            | 1264.30            | 0.669                          | 1705.34            | 1140.52            |
| A_68_P25608516 | chr7:151864802-151864846                          | NM_178642:59559        | Ano1          | INSIDE                 | 1.017                                                        | 2.007                          | 322.54             | 647.47             | 2.042                          | 299.49             | 611.62             |
| A_68_P25429184 | chr7:120351143-120351187                          | NM_007489:186          | Arntl         | INSIDE                 | 1.017                                                        | 1.853                          | 377.53             | 699.52             | 1.884                          | 392.14             | 738.73             |
| A_68_P24172963 | chr5:148116041-148116085                          | NM_007673:2763         | Cdx2          | INSIDE                 | 1.017                                                        | 1.417                          | 1109.13            | 1571.40            | 1.442                          | 930.91             | 1341.94            |
| A_68_P24056166 | chr5:123974219-123974263                          | NM_023232:-67          | Diablo        | PROMOTER               | 1.017                                                        | 0.339                          | 1819.62            | 616.63             | 0.345                          | 1453.42            | 501.13             |
| A_68_P24138646 | chr5:140447394-140447438                          | NM_175522:63520        | Elfn1         | INSIDE                 | 1.017                                                        | 2.221                          | 2382.98            | 5291.46            | 2.259                          | 1880.37            | 4247.98            |
| A_68_P31161106 | chr17:35960328-35960372                           | NM_008027:49           | Flot1         | INSIDE                 | 1.017                                                        | 1.451                          | 1122.42            | 1629.13            | 1.476                          | 989.82             | 1460.69            |
| A_68_P29228414 | chr13:94074555-94074599                           | NM_152134:-3412        | Homer1        | PROMOTER               | 1.017                                                        | 1.551                          | 1198.09            | 1858.08            | 1.578                          | 1033.15            | 1629.84            |
| A_68_P28290825 | chr12:25336262-25336306                           | NM_178357:49           | Klfl1         | INSIDE                 | 1.017                                                        | 2.733                          | 830.83             | 2270.37            | 2.778                          | 740.79             | 2057.97            |
| A_68_P21818285 | chr2:164333404-164333448                          | NM_133779:10402        | Pigt          | INSIDE                 | 1.017                                                        | 2.149                          | 956.00             | 2054.27            | 2.185                          | 851.94             | 1861.28            |
| A_68_P24120143 | chr5:136720679-136720723                          | NM_018825:73           | Sh2b2         | INSIDE                 | 1.017                                                        | 2.003                          | 1292.96            | 2589.23            | 2.036                          | 1186.73            | 2416.36            |
| A_68_P31850941 | chr18:78243939-78243983                           | NM_001101038:10047     | Siglec15      | INSIDE                 | 1.017                                                        | 1.549                          | 657.87             | 1018.73            | 1.575                          | 623.08             | 981.63             |
| A_68_P23364273 | chr4:141028839-141028883                          | NM_019763:65652        | Spn           | INSIDE                 | 1.017                                                        | 2.210                          | 2740.52            | 6057.52            | 2.247                          | 1916.89            | 4307.02            |
| A_68_P25195708 | chr7:74904333-74904377                            | NM_183312:274          | Synn          | INSIDE                 | 1.017                                                        | 1.519                          | 1274.06            | 1935.50            | 1.546                          | 1125.34            | 1739.29            |
| A_68_P20141348 | chr1:34987329-34987373                            |                        | Unknown       |                        | 1.017                                                        | 1.967                          | 1236.31            | 2431.97            | 2.001                          | 1052.53            | 2106.05            |
| A_68_P26128335 | chr8:106919047-106919091                          | NM_153582:528          | Cmtm4         | INSIDE                 | 1.016                                                        | 1.850                          | 894.07             | 1654.47            | 1.880                          | 844.66             | 1587.76            |
| A_68_P28525538 | chr12:72419084-72419128                           | NM_001190466:8236      | Dact1         | INSIDE                 | 1.016                                                        | 1.753                          | 794.77             | 1393.56            | 1.782                          | 639.90             | 1140.24            |
| A_68_P31286859 | chr17:63232405-63232449                           | NM_010109:-1760        | EfnA5         | PROMOTER               | 1.016                                                        | 1.874                          | 331.66             | 621.60             | 1.903                          | 330.00             | 628.16             |
| A_68_P25369179 | chr7:107855638-107855683                          | NM_178764:445          | Fam168a       | INSIDE                 | 1.016                                                        | 8.960                          | 2670.60            | 23928.05           | 9.103                          | 1674.27            | 15240.13           |
| A_68_P25048201 | chr7:35989266-35989310                            | NM_001024707:11076     | Lrp3          | INSIDE                 | 1.016                                                        | 2.233                          | 829.96             | 1853.41            | 2.268                          | 689.75             | 1564.32            |
| A_68_P26575781 | chr9:63225502-63225546                            | NM_011840:135          | Map2k5        | INSIDE                 | 1.016                                                        | 1.555                          | 984.16             | 1530.81            | 1.580                          | 901.52             | 1424.54            |
| A_68_P25354128 | chr7:105293642-105293686                          | NM_011010:293          | Omp           | INSIDE                 | 1.016                                                        | 2.863                          | 1432.66            | 4101.71            | 2.909                          | 1168.14            | 3397.84            |
| A_68_P29041946 | chr13:53206812-53206856                           | NM_013846:174644       | Ror2          | INSIDE                 | 1.016                                                        | 2.057                          | 2601.12            | 5351.79            | 2.091                          | 1847.13            | 3862.63            |
| A_68_P31254141 | chr17:56279185-56279230                           | NM_013662:-5932        | Sema6b        | PROMOTER               | 1.016                                                        | 3.127                          | 259.03             | 810.09             | 3.178                          | 280.49             | 891.52             |
| A_68_P31850954 | chr18:78245651-78245695                           | NM_001101038:8335      | Siglec15      | INSIDE                 | 1.016                                                        | 1.909                          | 1558.53            | 2975.74            | 1.940                          | 1387.78            | 2692.01            |

| ProbeName      | Target position of probe on CpG island microarray | TargetID            | GeneSymbol    | CpG island Description | Ratio of relative methylation (TiO <sub>2</sub> -NP/Vehicle) | Sham group                     |                    |                    | TiO <sub>2</sub> -H group      |                    |                    |
|----------------|---------------------------------------------------|---------------------|---------------|------------------------|--------------------------------------------------------------|--------------------------------|--------------------|--------------------|--------------------------------|--------------------|--------------------|
|                |                                                   |                     |               |                        |                                                              | Relative methylation (Cy5/Cy3) | Cy3 signal (Input) | Cy5 signal (MeDIP) | Relative methylation (Cy5/Cy3) | Cy3 signal (Input) | Cy5 signal (MeDIP) |
| A_68_P23339119 | chr4:136852669-136852713                          | NM_009523:19141     | Wnt4          | INSIDE                 | 1.016                                                        | 3.092                          | 498.27             | 1540.41            | 3.140                          | 516.62             | 1622.32            |
| A_68_P21839557 | chr2:167942759-167942803                          |                     |               | Unknown                | 1.016                                                        | 3.053                          | 581.51             | 1775.15            | 3.101                          | 529.29             | 1641.09            |
| A_68_P21037845 | chr2:17953722-17953766                            | NR_028376:5624      | A930004D18Rik | INSIDE                 | 1.015                                                        | 2.053                          | 566.94             | 1164.05            | 2.083                          | 451.20             | 939.92             |
| A_68_P21441217 | chr2:94278208-94278252                            | NM_007466:74        | Api5          | INSIDE                 | 1.015                                                        | 0.568                          | 1743.55            | 989.72             | 0.576                          | 1415.17            | 815.23             |
| A_68_P27383821 | chr10:98377167-98377211                           | NM_026482:-597      | Atp2b1        | PROMOTER               | 1.015                                                        | 1.770                          | 607.96             | 1076.19            | 1.797                          | 605.89             | 1088.74            |
| A_68_P26807071 | chr9:107096201-107096245                          | NM_153413:38018     | Dock3         | INSIDE                 | 1.015                                                        | 1.745                          | 792.40             | 1382.94            | 1.771                          | 736.95             | 1305.00            |
| A_68_P20146386 | chr1:36160613-36160657                            | NM_015818:35390     | Hs6st1        | INSIDE                 | 1.015                                                        | 2.158                          | 869.63             | 1876.25            | 2.190                          | 750.58             | 1644.13            |
| A_68_P28748144 | chr12:113384449-113384493                         | NM_001097621:52     | Kif26a        | INSIDE                 | 1.015                                                        | 2.190                          | 831.65             | 1821.24            | 2.222                          | 717.14             | 1593.27            |
| A_68_P23753092 | chr5:65213185-65213229                            | NM_008453:18445     | Klf3          | INSIDE                 | 1.015                                                        | 2.258                          | 573.82             | 1295.52            | 2.292                          | 440.10             | 1008.89            |
| A_68_P26017699 | chr8:86550056-86550100                            | NM_028877:4706      | Palm3         | INSIDE                 | 1.015                                                        | 1.803                          | 1404.78            | 2532.57            | 1.830                          | 1228.64            | 2248.92            |
| A_68_P25094417 | chr7:52934632-52934676                            | NM_019934:274       | Sec1          | INSIDE                 | 1.015                                                        | 2.394                          | 867.21             | 2075.92            | 2.429                          | 757.04             | 1839.20            |
| A_68_P27927812 | chr11:75546197-75546241                           | NM_009536:-170      | Ywhae         | PROMOTER               | 1.015                                                        | 1.773                          | 1414.14            | 2507.42            | 1.800                          | 1256.66            | 2261.99            |
| A_68_P21067989 | chr2:24617842-24617886                            | NM_001042528:703    | Caena1b       | INSIDE                 | 1.014                                                        | 1.377                          | 4255.00            | 5859.70            | 1.397                          | 3168.92            | 4426.03            |
| A_68_P23316406 | chr4:132776655-132776700                          | NM_027152:-46       | Cd164l2       | DIVERGENT_PROMOTER     | 1.014                                                        | 3.110                          | 397.54             | 1236.39            | 3.154                          | 313.71             | 989.46             |
| A_68_P26844287 | chr9:114277292-114277336                          | NM_019922:22516     | Crtap         | DOWNSTREAM             | 1.014                                                        | 1.733                          | 1719.52            | 2979.48            | 1.757                          | 1524.39            | 2678.85            |
| A_68_P32982442 | chr5:135115011-135115055                          | NM_033561:166       | Eif4h         | INSIDE                 | 1.014                                                        | 0.546                          | 1207.47            | 659.26             | 0.554                          | 916.99             | 507.75             |
| A_68_P28940413 | chr13:34838757-34838801                           | NM_138746:7268      | Fam50b        | INSIDE                 | 1.014                                                        | 2.543                          | 368.97             | 938.27             | 2.579                          | 336.41             | 867.71             |
| A_68_P25666781 | chr8:13200390-13200434                            | NM_025768:212       | Grip1         | INSIDE                 | 1.014                                                        | 1.465                          | 1125.60            | 1649.24            | 1.485                          | 1047.05            | 1555.01            |
| A_68_P29616396 | chr14:55732459-55732503                           | NM_177049:3292      | Jph4          | INSIDE                 | 1.014                                                        | 2.253                          | 1169.56            | 2635.17            | 2.285                          | 1041.20            | 2379.30            |
| A_68_P27947419 | chr11:78959894-78959938                           | NM_013571:-60       | Ksr1          | PROMOTER               | 1.014                                                        | 1.502                          | 3094.52            | 4648.20            | 1.523                          | 2556.05            | 3892.26            |
| A_68_P25368691 | chr7:107757091-107757135                          | NR_003559:-602      | Mrp148        | PROMOTER               | 1.014                                                        | 0.603                          | 1410.81            | 851.24             | 0.612                          | 1116.13            | 683.04             |
| A_68_P22342235 | chr3:94910203-94910247                            | NM_008847:556       | Pip5k1a       | INSIDE                 | 1.014                                                        | 0.569                          | 1403.59            | 798.30             | 0.576                          | 1035.68            | 597.02             |
| A_68_P24054126 | chr5:123588945-123588989                          | NM_175092:-6328     | RhoF          | PROMOTER               | 1.014                                                        | 1.924                          | 660.05             | 1269.78            | 1.952                          | 657.46             | 1283.12            |
| A_68_P26476666 | chr9:45714950-45714994                            | NM_178709:-12       | Rnf214        | PROMOTER               | 1.014                                                        | 1.892                          | 728.81             | 1378.68            | 1.918                          | 644.17             | 1235.64            |
| A_68_P31093842 | chr17:23956720-23956764                           | NM_175229:16589     | Srrm2         | INSIDE                 | 1.014                                                        | 3.328                          | 834.28             | 2776.45            | 3.373                          | 591.45             | 1994.92            |
| A_68_P30363681 | chr15:78823328-78823373                           | NM_001024716:9865   | Triobp        | INSIDE                 | 1.014                                                        | 2.259                          | 1654.09            | 3736.50            | 2.290                          | 1179.71            | 2701.38            |
| A_68_P21365117 | chr2:78709405-78709449                            | NM_009454:223       | Ube2e3        | INSIDE                 | 1.014                                                        | 2.795                          | 780.54             | 2181.78            | 2.834                          | 746.57             | 2115.65            |
| A_68_P26217007 | chr8:122480845-122480889                          | NM_009462:46115     | Usp10         | INSIDE                 | 1.014                                                        | 3.210                          | 1206.90            | 3874.09            | 3.254                          | 1113.49            | 3623.31            |
| A_68_P30633251 | chr16:28929310-28929354                           | NM_177718:452       | 1600021P15Rik | INSIDE                 | 1.013                                                        | 1.395                          | 1324.84            | 1847.92            | 1.413                          | 1015.53            | 1434.97            |
| A_68_P28183252 | chr11:120098764-120098808                         | NM_198423:4526      | Bahcc1        | INSIDE                 | 1.013                                                        | 1.649                          | 671.53             | 1107.56            | 1.672                          | 654.90             | 1094.68            |
| A_68_P28724522 | chr12:109154828-109154872                         | NM_001079883:86774  | Bcl11b        | INSIDE                 | 1.013                                                        | 1.999                          | 461.41             | 922.13             | 2.024                          | 421.72             | 853.50             |
| A_68_P24318693 | chr6:28084879-28084923                            | NM_008174:-531      | Grm8          | PROMOTER               | 1.013                                                        | 0.574                          | 1194.61            | 685.64             | 0.581                          | 921.40             | 535.66             |
| A_68_P23435246 | chr4:154334733-154334777                          | NM_010419:-277      | Hes5          | PROMOTER               | 1.013                                                        | 2.014                          | 989.10             | 1992.23            | 2.041                          | 922.83             | 1883.36            |
| A_68_P22344946 | chr3:95462398-95462442                            | NM_008562:-222      | Mcl1          | PROMOTER               | 1.013                                                        | 1.635                          | 484.53             | 792.15             | 1.656                          | 511.46             | 846.92             |
| A_68_P31621832 | chr18:36227944-36227988                           | NM_001167891:128848 | Nrg2          | INSIDE                 | 1.013                                                        | 2.233                          | 1152.09            | 2572.24            | 2.261                          | 1044.89            | 2362.36            |
| A_68_P21782730 | chr2:158236015-158236059                          | NM_177658:448       | Ralgapb       | INSIDE                 | 1.013                                                        | 1.807                          | 537.36             | 970.97             | 1.831                          | 504.21             | 923.07             |
| A_68_P23896972 | chr5:93371791-93371835                            | NM_001077596:44789  | Shroom3       | INSIDE                 | 1.013                                                        | 3.740                          | 570.92             | 2135.49            | 3.790                          | 622.83             | 2360.71            |
| A_68_P21973812 | chr3:19062717-19062761                            | NM_028840:327       | Armc1         | INSIDE                 | 1.012                                                        | 1.519                          | 1032.29            | 1568.44            | 1.538                          | 849.62             | 1306.98            |
| A_68_P32233090 | chrX:5660210-5660254                              | NM_001033211:306    | AU022751      | INSIDE                 | 1.012                                                        | 2.497                          | 646.75             | 1615.14            | 2.527                          | 366.40             | 925.79             |
| A_68_P26349690 | chr9:21752178-21752222                            | NM_144935:9483      | BC018242      | INSIDE                 | 1.012                                                        | 2.016                          | 1399.69            | 2821.67            | 2.040                          | 1070.25            | 2182.84            |
| A_68_P20499743 | chr1:106665396-106665440                          | NM_011800:23        | Cdh20         | INSIDE                 | 1.012                                                        | 0.615                          | 1911.54            | 1175.65            | 0.622                          | 1635.89            | 1017.94            |
| A_68_P23976362 | chr5:109987925-109987969                          | NM_001164735:66     | Crf2          | INSIDE                 | 1.012                                                        | 0.465                          | 1240.84            | 576.63             | 0.470                          | 1004.97            | 472.64             |
| A_68_P31614615 | chr18:34937144-34937188                           | NM_001081256:505    | Kdm3b         | INSIDE                 | 1.012                                                        | 1.790                          | 473.38             | 847.35             | 1.812                          | 473.69             | 858.42             |
| A_68_P25950174 | chr8:72682451-72682495                            | NM_001045484:5796   | Mef2b         | INSIDE                 | 1.012                                                        | 1.931                          | 2110.83            | 4075.30            | 1.954                          | 1855.97            | 3626.75            |
| A_68_P23278933 | chr4:125911136-125911183                          | NM_001145970:22404  | Mtap7d1       | INSIDE                 | 1.012                                                        | 2.787                          | 630.04             | 1755.81            | 2.821                          | 546.32             | 1541.15            |
| A_68_P24950724 | chr7:4781725-4781769                              | NM_172737:14552     | Shisa7        | INSIDE                 | 1.012                                                        | 2.196                          | 3129.99            | 6872.76            | 2.222                          | 2439.66            | 5421.08            |
| A_68_P30486832 | chr15:100467219-100467263                         | NM_174992:46        | Smagp         | INSIDE                 | 1.012                                                        | 3.127                          | 692.71             | 2166.03            | 3.164                          | 701.87             | 2220.55            |
| A_68_P31923332 | chr19:4477049-4477093                             | NM_134164:73        | Syt12         | INSIDE                 | 1.012                                                        | 1.926                          | 639.69             | 1231.78            | 1.948                          | 604.18             | 1177.16            |
| A_68_P25009655 | chr7:26100173-26100217                            | NM_183311:9068      | Tmem145       | INSIDE                 | 1.012                                                        | 2.226                          | 6421.23            | 14294.07           | 2.253                          | 4633.53            | 10440.78           |
| A_68_P21836349 | chr2:167423229-167423273                          | NM_023230:34255     | Ube2v1        | DOWNSTREAM             | 1.012                                                        | 1.669                          | 2968.08            | 4953.87            | 1.689                          | 2335.93            | 3945.19            |
| A_68_P26342783 | A_68_P26342783                                    |                     |               | Unknown                | 1.012                                                        | 1.466                          | 1444.83            | 2118.13            | 1.484                          | 1277.74            | 1895.80            |

| ProbeName      | Target position of probe on CpG island microarray | TargetID                 | GeneSymbol    | CpG island Description | Ratio of relative methylation (TiO <sub>2</sub> -NP/Vehicle) | Sham group                     |                    |                    | TiO <sub>2</sub> -H group      |                    |                    |
|----------------|---------------------------------------------------|--------------------------|---------------|------------------------|--------------------------------------------------------------|--------------------------------|--------------------|--------------------|--------------------------------|--------------------|--------------------|
|                |                                                   |                          |               |                        |                                                              | Relative methylation (Cy5/Cy3) | Cy3 signal (Input) | Cy5 signal (MeDIP) | Relative methylation (Cy5/Cy3) | Cy3 signal (Input) | Cy5 signal (MeDIP) |
| A_68_P26580034 | chr9:63932732-63932776                            | AK011166:4187            |               | INSIDE                 | 1.012                                                        | 1.539                          | 1307.95            | 2012.57            | 1.557                          | 1070.35            | 1666.64            |
| A_68_P24067081 | chr5:125956133-125956177                          | NM_030210:-88            | Aacs          | PROMOTER               | 1.011                                                        | 1.365                          | 4018.89            | 5484.01            | 1.380                          | 2988.95            | 4124.90            |
| A_68_P23005030 | chr4:69910440-69910484                            | NM_145990:160939         | Cdk5rap2      | INSIDE                 | 1.011                                                        | 2.938                          | 699.38             | 2054.96            | 2.971                          | 679.00             | 2017.47            |
| A_68_P24568082 | chr6:77929708-77929753                            | NM_001109764:-69         | Ctnna2        | PROMOTER               | 1.011                                                        | 1.909                          | 690.35             | 1317.99            | 1.930                          | 598.55             | 1155.48            |
| A_68_P21612765 | chr2:127162244-127162288                          | NM_010090:372            | Dusp2         | INSIDE                 | 1.011                                                        | 1.642                          | 535.98             | 880.06             | 1.659                          | 490.61             | 814.12             |
| A_68_P27093482 | chr10:41917067-41917111                           | NM_019740:79460          | Foxo3         | INSIDE                 | 1.011                                                        | 2.142                          | 1238.06            | 2652.45            | 2.166                          | 934.39             | 2024.22            |
| A_68_P26745534 | chr9:96020049-96020093                            | NM_177352:223            | Gk5           | INSIDE                 | 1.011                                                        | 0.543                          | 1819.24            | 987.26             | 0.548                          | 1628.24            | 892.95             |
| A_68_P23226010 | chr4:115500724-115500768                          | NM_175308:50             | Mobkl2c       | INSIDE                 | 1.011                                                        | 0.535                          | 1002.96            | 536.94             | 0.541                          | 801.46             | 433.77             |
| A_68_P20347699 | chr1:74331738-74331785                            | NM_025580:154            | Pnkd          | INSIDE                 | 1.011                                                        | 1.691                          | 758.95             | 1283.02            | 1.709                          | 559.87             | 956.66             |
| A_68_P24951460 | chr7:4945585-4945629                              | NM_026741:2097           | Zfp579        | INSIDE                 | 1.011                                                        | 2.230                          | 1910.44            | 4259.86            | 2.254                          | 1348.44            | 3038.83            |
| A_68_P26017563 | chr8:86525640-86525684                            | NM_183097:58             | 1700067K01Rik | INSIDE                 | 1.010                                                        | 2.204                          | 752.06             | 1657.50            | 2.227                          | 753.10             | 1677.15            |
| A_68_P32362518 | chrX:45387551-45387595                            | NM_013912:457            | Apln          | INSIDE                 | 1.010                                                        | 2.013                          | 1801.68            | 3626.97            | 2.033                          | 884.07             | 1796.93            |
| A_68_P23440845 | chr4:155205317-155205361                          | NM_025338:-416           | Aurkaip1      | PROMOTER               | 1.010                                                        | 0.508                          | 1126.88            | 572.90             | 0.514                          | 957.57             | 491.81             |
| A_68_P29530306 | chr14:35315823-35315867                           | NM_009758:-112           | Bmpr1a        | PROMOTER               | 1.010                                                        | 3.763                          | 505.08             | 1900.53            | 3.799                          | 552.53             | 2098.93            |
| A_68_P29696921 | chr14:70132430-70132474                           | NM_134078:-75            | Chmp7         | PROMOTER               | 1.010                                                        | 1.422                          | 2147.44            | 3053.09            | 1.436                          | 1764.10            | 2533.06            |
| A_68_P21144178 | chr2:37648888-37648932                            | NM_001163566:17142       | Crb2          | INSIDE                 | 1.010                                                        | 2.973                          | 1359.61            | 4041.92            | 3.003                          | 1095.21            | 3289.18            |
| A_68_P31630972 | chr18:38094826-38094871                           | NM_007858:217            | Diap1         | INSIDE                 | 1.010                                                        | 3.595                          | 557.32             | 2003.72            | 3.632                          | 562.94             | 2044.53            |
| A_68_P23284224 | chr4:126913454-126913498                          | NM_198618:66962          | Dlgap3        | INSIDE                 | 1.010                                                        | 1.495                          | 1391.98            | 2080.57            | 1.510                          | 1181.16            | 1783.87            |
| A_68_P32027007 | chr19:25073867-25073911                           | NM_028785:-130           | Dock8         | PROMOTER               | 1.010                                                        | 4.875                          | 260.05             | 1267.68            | 4.923                          | 279.03             | 1373.52            |
| A_68_P25286998 | chr7:91300735-91300779                            | NM_133722:-353           | Fam108c       | PROMOTER               | 1.010                                                        | 1.437                          | 1560.32            | 2242.21            | 1.452                          | 1184.32            | 1719.21            |
| A_68_P24046893 | chr5:122303149-122303193                          | NM_175474:4134           | Fam109a       | INSIDE                 | 1.010                                                        | 2.419                          | 593.54             | 1435.60            | 2.443                          | 537.66             | 1313.34            |
| A_68_P27497672 | chr10:119912710-119912754                         | NM_010441:1259           | Hmga2         | INSIDE                 | 1.010                                                        | 1.607                          | 890.13             | 1430.01            | 1.623                          | 900.92             | 1462.32            |
| A_68_P27788208 | chr11:50191636-50191680                           | NM_021510:438            | Hnrmp1        | INSIDE                 | 1.010                                                        | 0.473                          | 1172.77            | 555.28             | 0.478                          | 972.22             | 464.97             |
| A_68_P28293530 | chr12:25783788-25783832                           | NM_010496:-2853          | Id2           | PROMOTER               | 1.010                                                        | 2.008                          | 269.06             | 540.19             | 2.028                          | 285.86             | 579.62             |
| A_68_P31614612 | chr18:34936814-34936858                           | NM_001081256:175         | Kdm3b         | INSIDE                 | 1.010                                                        | 0.550                          | 1664.94            | 916.45             | 0.556                          | 1670.41            | 928.88             |
| A_68_P27285759 | chr10:80297631-80297675                           | NM_001013758:9132        | Lingo3        | INSIDE                 | 1.010                                                        | 1.710                          | 684.92             | 1171.13            | 1.728                          | 563.57             | 973.59             |
| A_68_P29661996 | chr14:64162753-64162797                           | NM_177594:16             | Mtmr9         | INSIDE                 | 1.010                                                        | 1.836                          | 2333.69            | 4285.60            | 1.855                          | 1564.53            | 2902.65            |
| A_68_P24983630 | chr7:17441193-17441237                            | NM_178900:12801          | Prkd2         | INSIDE                 | 1.010                                                        | 2.522                          | 1875.45            | 4729.09            | 2.547                          | 1467.04            | 3736.58            |
| A_68_P24459349 | chr6:53770114-53770158                            | NM_025817:683            | Tril          | INSIDE                 | 1.010                                                        | 1.998                          | 2589.86            | 5174.29            | 2.018                          | 2293.26            | 4628.66            |
| A_68_P32144292 | chr19:46574510-46574557                           | NM_053100:-1604          | Trim8         | PROMOTER               | 1.010                                                        | 0.525                          | 1206.72            | 633.26             | 0.530                          | 1104.49            | 585.53             |
| A_68_P27234637 | chr10:70747983-70748027                           | NM_145420:6              | Ube2d1        | INSIDE                 | 1.010                                                        | 1.772                          | 519.76             | 921.14             | 1.791                          | 465.17             | 832.92             |
| A_68_P27564654 | chr11:5616764-5616808                             | NM_178623:24393          | Urgcp         | INSIDE                 | 1.010                                                        | 2.461                          | 312.41             | 768.82             | 2.486                          | 349.49             | 868.85             |
| A_68_P29601197 | chr14:51978178-51978222                           | ENSMUST00000162079:3332  |               | DOWNSTREAM             | 1.010                                                        | 1.722                          | 1202.64            | 2070.65            | 1.738                          | 1030.84            | 1791.81            |
| A_68_P31103776 | chr17:25569955-25569999                           | NM_001163691:752         | Caena1h       | INSIDE                 | 1.009                                                        | 1.427                          | 1370.68            | 1955.87            | 1.440                          | 1124.35            | 1618.75            |
| A_68_P30330813 | chr15:73342857-73342901                           | NM_001081066:-111        | Dennd3        | PROMOTER               | 1.009                                                        | 1.664                          | 2966.96            | 4937.93            | 1.679                          | 2315.90            | 3888.75            |
| A_68_P31932438 | chr19:6058043-6058087                             | NM_001190436:98          | Fau           | INSIDE                 | 1.009                                                        | 1.496                          | 3182.57            | 4760.79            | 1.509                          | 2526.55            | 3812.69            |
| A_68_P23193164 | chr4:107518873-107518917                          | NM_001080926:44031       | Lrp8          | INSIDE                 | 1.009                                                        | 1.953                          | 1565.41            | 3057.58            | 1.971                          | 1287.31            | 2537.44            |
| A_68_P25954896 | chr8:73437919-73437963                            | NM_173013:8068           | Mtap1s        | INSIDE                 | 1.009                                                        | 1.754                          | 700.91             | 1229.73            | 1.771                          | 486.55             | 861.71             |
| A_68_P29162262 | chr13:78334257-78334301                           | NM_010151:3965           | Nr2f1         | INSIDE                 | 1.009                                                        | 0.548                          | 996.14             | 545.77             | 0.553                          | 902.03             | 498.63             |
| A_68_P30422879 | chr15:88898490-88898534                           | NM_001002005:8357        | Panx2         | INSIDE                 | 1.009                                                        | 1.660                          | 824.96             | 1369.59            | 1.675                          | 671.27             | 1124.22            |
| A_68_P29059921 | chr13:56322911-56322955                           | ENSMUST00000127754:22369 |               | DOWNSTREAM             | 1.009                                                        | 1.948                          | 1010.11            | 1967.44            | 1.966                          | 849.57             | 1670.45            |
| A_68_P21615625 | chr2:127618048-127618092                          | NR_015476:154            | 1500011K16Rik | INSIDE                 | 1.008                                                        | 1.715                          | 1826.80            | 3132.61            | 1.729                          | 1407.15            | 2433.34            |
| A_68_P33007150 | chr9_random:50340-50384                           | NR_015516:-3046          | 493052615Rik  | PROMOTER               | 1.008                                                        | 3.159                          | 4502.30            | 14222.42           | 3.184                          | 2977.33            | 9479.68            |
| A_68_P24138255 | chr5:140384458-140384502                          | NM_175522:584            | Elfn1         | INSIDE                 | 1.008                                                        | 2.956                          | 360.77             | 1066.50            | 2.981                          | 288.15             | 859.02             |
| A_68_P27284174 | chr10:80049350-80049394                           | NM_145421:3714           | Fam108a       | INSIDE                 | 1.008                                                        | 2.250                          | 444.84             | 1001.10            | 2.270                          | 412.50             | 936.18             |
| A_68_P28603297 | chr12:86629542-86629586                           | NM_172414:24             | Fam164c       | INSIDE                 | 1.008                                                        | 1.465                          | 1028.09            | 1505.74            | 1.477                          | 837.25             | 1236.28            |
| A_68_P23253012 | chr4:120419677-120419721                          | NM_001081142:83          | Kenq4         | INSIDE                 | 1.008                                                        | 2.915                          | 864.16             | 2518.82            | 2.937                          | 827.59             | 2430.77            |
| A_68_P25368689 | chr7:107756875-107756919                          | NR_003559:-386           | Mrpl48        | PROMOTER               | 1.008                                                        | 1.444                          | 2725.65            | 3935.18            | 1.456                          | 1948.57            | 2836.21            |
| A_68_P21821257 | chr2:164860379-164860423                          | NM_144892:-121           | Ncoa5         | PROMOTER               | 1.008                                                        | 0.651                          | 1672.78            | 1088.72            | 0.656                          | 1413.82            | 927.64             |
| A_68_P29448699 | chr14:21553663-21553707                           | NM_010811:100            | Ndst2         | INSIDE                 | 1.008                                                        | 1.733                          | 609.99             | 1057.13            | 1.747                          | 594.94             | 1039.31            |
| A_68_P31633051 | chr18:38428772-38428818                           | NM_017378:15261          | Pedh12        | INSIDE                 | 1.008                                                        | 2.192                          | 395.43             | 866.62             | 2.208                          | 324.50             | 716.63             |

| ProbeName      | Target position of probe on CpG island microarray | TargetID                | GeneSymbol | CpG island Description | Ratio of relative methylation (TiO <sub>2</sub> -NP/Vehicle) | Sham group                     |                    |                    | TiO <sub>2</sub> -H group      |                    |                    |
|----------------|---------------------------------------------------|-------------------------|------------|------------------------|--------------------------------------------------------------|--------------------------------|--------------------|--------------------|--------------------------------|--------------------|--------------------|
|                |                                                   |                         |            |                        |                                                              | Relative methylation (Cy5/Cy3) | Cy3 signal (Input) | Cy5 signal (MeDIP) | Relative methylation (Cy5/Cy3) | Cy3 signal (Input) | Cy5 signal (MeDIP) |
| A_68_P29637348 | chr14:59820302-59820347                           | NM_027764:260           | Reb1b1     | INSIDE                 | 1.008                                                        | 1.812                          | 415.53             | 752.95             | 1.827                          | 419.01             | 765.41             |
| A_68_P29041999 | chr13:53214193-53214237                           | NM_013846:167264        | Ror2       | INSIDE                 | 1.008                                                        | 2.409                          | 2226.22            | 5362.56            | 2.429                          | 1769.41            | 4297.48            |
| A_68_P23236667 | chr4:117508851-117508895                          | NM_008135:1010          | Slc6a9     | INSIDE                 | 1.008                                                        | 1.790                          | 2295.98            | 4109.55            | 1.805                          | 1805.86            | 3259.59            |
| A_68_P32672206 | chrX:131009632-131009676                          | NM_028958:1375          | Taf7l      | INSIDE                 | 1.008                                                        | 1.980                          | 655.92             | 1298.44            | 1.995                          | 1805.86            | 3259.59            |
| A_68_P31155254 | chr17:34817160-34817204                           | NM_031176:9703          | Tnxb       | INSIDE                 | 1.008                                                        | 2.338                          | 1740.76            | 4069.74            | 2.356                          | 1394.26            | 3285.44            |
| A_68_P30588066 | chr16:20535808-20535852                           | NM_009679:254           | Ap2m1      | INSIDE                 | 1.007                                                        | 1.478                          | 1137.84            | 1681.89            | 1.488                          | 1032.94            | 1537.22            |
| A_68_P31118685 | chr17:27957394-27957438                           | NM_001033279:71         | D17Wsu92e  | INSIDE                 | 1.007                                                        | 1.898                          | 964.71             | 1831.38            | 1.912                          | 926.36             | 1771.00            |
| A_68_P27093484 | chr10:41917285-41917329                           | NM_019740:79242         | Foxo3      | INSIDE                 | 1.007                                                        | 2.237                          | 990.21             | 2215.21            | 2.252                          | 784.37             | 1766.72            |
| A_68_P31936820 | chr19:7016078-7016122                             | NM_001177362:-103       | Gpr137     | DIVERGENT_PROMOTER     | 1.007                                                        | 1.876                          | 486.50             | 912.75             | 1.890                          | 440.05             | 831.78             |
| A_68_P23417748 | chr4:151661232-151661276                          | NM_008237:4517          | Hes3       | INSIDE                 | 1.007                                                        | 1.432                          | 1667.53            | 2387.37            | 1.441                          | 1274.33            | 1836.72            |
| A_68_P27279590 | chr10:79362078-79362122                           | NM_001163276:9583       | Med16      | INSIDE                 | 1.007                                                        | 1.578                          | 761.35             | 1201.04            | 1.588                          | 527.52             | 837.75             |
| A_68_P22038556 | chr3:32428603-32428647                            | NM_024200:221           | Mfn1       | INSIDE                 | 1.007                                                        | 0.557                          | 1335.70            | 744.06             | 0.561                          | 1182.42            | 663.26             |
| A_68_P23615665 | chr5:38208583-38208627                            | NM_010835:7220          | Msx1       | DOWNSTREAM             | 1.007                                                        | 1.433                          | 2007.23            | 2877.15            | 1.443                          | 1648.83            | 2380.03            |
| A_68_P27909148 | chr11:71864535-71864579                           | NM_001024927:84835      | Pitpnm3    | INSIDE                 | 1.007                                                        | 1.668                          | 4574.97            | 7632.05            | 1.680                          | 4016.57            | 6749.75            |
| A_68_P31023591 | chr17:7182888-7182932                             | NM_026611:-298          | Rnaset2b   | PROMOTER               | 1.007                                                        | 4.818                          | 4524.14            | 21797.33           | 4.850                          | 3298.44            | 15998.23           |
| A_68_P31351304 | chr17:74794846-74794890                           | NM_144798:-103          | Slc30a6    | PROMOTER               | 1.007                                                        | 0.606                          | 1054.37            | 638.52             | 0.610                          | 871.46             | 531.30             |
| A_68_P29699983 | chr14:70605493-70605537                           | NM_011366:1930          | Sorbs3     | INSIDE                 | 1.007                                                        | 0.670                          | 1342.98            | 899.67             | 0.675                          | 1134.47            | 765.68             |
| A_68_P25009106 | chr7:26010791-26010835                            | NM_175436:4343          | Zfp526     | INSIDE                 | 1.007                                                        | 2.151                          | 1569.87            | 3377.11            | 2.167                          | 1196.81            | 2593.15            |
| A_68_P25504741 | chr7:134388254-134388298                          | NM_177362:237           | Zfp771     | INSIDE                 | 1.007                                                        | 0.505                          | 1146.43            | 579.16             | 0.509                          | 1017.06            | 517.56             |
| A_68_P30665796 | chr16:34745100-34745144                           | ENSMUST00000155268:-173 |            | PROMOTER               | 1.007                                                        | 2.874                          | 274.14             | 787.92             | 2.894                          | 278.81             | 806.94             |
| A_68_P23155321 | chr4:101169179-101169223                          | NM_198412:-52           | Dnajc6     | PROMOTER               | 1.006                                                        | 2.036                          | 954.91             | 1944.31            | 2.049                          | 846.14             | 1733.69            |
| A_68_P27550688 | chr11:3102520-3102564                             | NM_023743:-43           | Eif4enif1  | PROMOTER               | 1.006                                                        | 1.707                          | 616.43             | 1052.56            | 1.719                          | 621.81             | 1068.60            |
| A_68_P31490817 | chr18:10609887-10609931                           | NM_001081222:442        | Esco1      | INSIDE                 | 1.006                                                        | 1.449                          | 909.60             | 1318.25            | 1.459                          | 858.72             | 1252.47            |
| A_68_P21278821 | chr2:63936348-63936392                            | NM_021716:-301          | Fign       | PROMOTER               | 1.006                                                        | 1.576                          | 1081.45            | 1704.32            | 1.585                          | 1018.56            | 1614.78            |
| A_68_P23451693 | chr5:4758175-4758219                              | NM_021457:20            | Fzd1       | INSIDE                 | 1.006                                                        | 1.814                          | 1211.79            | 2198.78            | 1.825                          | 993.84             | 1814.15            |
| A_68_P30143280 | chr15:37209165-37209209                           | NM_026496:46396         | Grlh2      | INSIDE                 | 1.006                                                        | 2.350                          | 234.00             | 549.91             | 2.365                          | 201.84             | 477.27             |
| A_68_P23340289 | chr4:137074647-137074691                          | NM_008305:49951         | Hspg2      | INSIDE                 | 1.006                                                        | 3.265                          | 739.05             | 2413.32            | 3.284                          | 579.80             | 1903.98            |
| A_68_P29620045 | chr14:56442427-56442471                           | NM_001168346:-1183      | Nfatc4     | PROMOTER               | 1.006                                                        | 2.332                          | 454.75             | 1060.33            | 2.347                          | 383.31             | 899.49             |
| A_68_P25370888 | chr7:108147418-108147462                          | NM_008773:13065         | P2ry2      | INSIDE                 | 1.006                                                        | 8.220                          | 2586.95            | 21264.25           | 8.265                          | 1766.71            | 14602.70           |
| A_68_P27215088 | chr10:67442788-67442832                           | NM_001081346:465        | Rtkn2      | INSIDE                 | 1.006                                                        | 0.540                          | 1011.31            | 546.00             | 0.543                          | 835.68             | 453.98             |
| A_68_P26137064 | chr8:108489850-108489894                          | NM_009195:67            | Slc12a4    | INSIDE                 | 1.006                                                        | 0.456                          | 2060.77            | 939.01             | 0.458                          | 1391.72            | 637.74             |
| A_68_P26814194 | chr9:108208208-108208252                          | NM_133986:52            | Teta       | INSIDE                 | 1.006                                                        | 1.690                          | 894.57             | 1511.87            | 1.700                          | 735.98             | 1251.44            |
| A_68_P31190361 | chr17:43766788-43766832                           | NM_001161366:438        | Tdrd6      | INSIDE                 | 1.006                                                        | 3.590                          | 951.40             | 3415.20            | 3.611                          | 912.93             | 3296.31            |
| A_68_P26596757 | chr9:66897011-66897055                            | NM_001164249:-12        | Tpm1       | PROMOTER               | 1.006                                                        | 1.442                          | 3824.26            | 5514.37            | 1.451                          | 2927.24            | 4247.17            |
| A_68_P22037675 | chr3:32264764-32264808                            | NM_009517:-199          | Zmat3      | PROMOTER               | 1.006                                                        | 1.633                          | 996.45             | 1627.40            | 1.643                          | 880.81             | 1446.98            |
| A_68_P20722811 | chr1:154613676-154613720                          | NM_026369:27            | Arpc5      | INSIDE                 | 1.005                                                        | 1.558                          | 713.77             | 1112.18            | 1.566                          | 616.26             | 964.87             |
| A_68_P29020671 | chr13:48758693-48758737                           | NM_007526:310           | Barx1      | INSIDE                 | 1.005                                                        | 1.639                          | 999.27             | 1637.75            | 1.647                          | 923.83             | 1521.97            |
| A_68_P23295624 | chr4:128900663-128900707                          | NM_001033189:25003      | C77080     | INSIDE                 | 1.005                                                        | 1.626                          | 781.47             | 1270.36            | 1.634                          | 673.90             | 1100.85            |
| A_68_P21073094 | chr2:25433567-25433611                            | NM_001005424:2031       | Gm996      | INSIDE                 | 1.005                                                        | 1.888                          | 904.89             | 1708.26            | 1.898                          | 938.00             | 1780.18            |
| A_68_P20146387 | chr1:36160737-36160781                            | NM_015818:35514         | Hs6st1     | INSIDE                 | 1.005                                                        | 2.040                          | 583.09             | 1189.37            | 2.051                          | 506.11             | 1037.92            |
| A_68_P31096079 | chr17:24346336-24346380                           | NM_010947:-26           | Ntn3       | PROMOTER               | 1.005                                                        | 1.464                          | 1130.61            | 1655.35            | 1.472                          | 1167.37            | 1718.29            |
| A_68_P23543338 | chr5:24191818-24191862                            | NM_016736:208           | Nub1       | INSIDE                 | 1.005                                                        | 1.918                          | 911.88             | 1749.16            | 1.928                          | 782.21             | 1508.27            |
| A_68_P20971762 | chr2:4985136-4985180                              | NM_181848:-174          | Optn       | PROMOTER               | 1.005                                                        | 2.105                          | 5285.74            | 11125.04           | 2.114                          | 4344.30            | 9185.21            |
| A_68_P22590676 | chr3:142058482-142058526                          | NM_001190857:-3690      | Pdlim5     | PROMOTER               | 1.005                                                        | 0.719                          | 2330.56            | 1674.66            | 0.722                          | 1825.16            | 1317.80            |
| A_68_P26630945 | chr9:72887670-72887714                            | NM_018889:-186          | Pigb       | DIVERGENT_PROMOTER     | 1.005                                                        | 3.054                          | 642.40             | 1961.74            | 3.068                          | 708.79             | 2174.67            |
| A_68_P28314292 | chr12:29334596-29334640                           | NM_011275:152           | Rnaseh1    | INSIDE                 | 1.005                                                        | 0.588                          | 1334.25            | 785.20             | 0.591                          | 1063.12            | 628.47             |
| A_68_P23668846 | chr5:48374552-48374596                            | NM_178804:181           | Slit2      | INSIDE                 | 1.005                                                        | 0.554                          | 924.62             | 512.65             | 0.557                          | 731.04             | 407.43             |
| A_68_P25670557 | chr8:13786121-13786165                            | NM_025924:528           | Upf3a      | INSIDE                 | 1.005                                                        | 0.547                          | 1048.31            | 573.12             | 0.549                          | 827.64             | 454.76             |
| A_68_P25614226 | chr8:3495954-3495998                              | NM_080461:2839          | Zfp358     | INSIDE                 | 1.005                                                        | 3.586                          | 411.15             | 1474.50            | 3.606                          | 414.49             | 1494.65            |
| A_68_P25714452 | chr8:24168992-24169036                            | NM_031158:268           | Ank1       | INSIDE                 | 1.004                                                        | 1.617                          | 1589.37            | 2570.48            | 1.624                          | 1204.46            | 1956.55            |
| A_68_P21067471 | chr2:24534614-24534658                            | NM_001042528:83931      | Cacna1b    | INSIDE                 | 1.004                                                        | 2.402                          | 766.26             | 1840.88            | 2.412                          | 629.44             | 1518.37            |

| ProbeName      | Target position of probe on CpG island microarray | TargetID                | GeneSymbol    | CpG island Description | Ratio of relative methylation (TiO <sub>2</sub> -NP/Vehicle) | Sham group                     |                    |                    | TiO <sub>2</sub> -H group      |                    |                    |
|----------------|---------------------------------------------------|-------------------------|---------------|------------------------|--------------------------------------------------------------|--------------------------------|--------------------|--------------------|--------------------------------|--------------------|--------------------|
|                |                                                   |                         |               |                        |                                                              | Relative methylation (Cy5/Cy3) | Cy3 signal (Input) | Cy5 signal (MeDIP) | Relative methylation (Cy5/Cy3) | Cy3 signal (Input) | Cy5 signal (MeDIP) |
| A_68_P25392337 | chr7:112583863-112583907                          | NM_007627:9551          | Cekbr         | INSIDE                 | 1.004                                                        | 3.326                          | 1134.41            | 3772.78            | 3.338                          | 903.46             | 3015.59            |
| A_68_P31755198 | chr18:61195223-61195267                           | NM_009880:609           | Cdx1          | INSIDE                 | 1.004                                                        | 1.758                          | 498.10             | 875.64             | 1.764                          | 444.91             | 785.00             |
| A_68_P27286398 | chr10:80392047-80392091                           | NM_008655:-767          | Gadd45b       | PROMOTER               | 1.004                                                        | 0.557                          | 1109.90            | 618.49             | 0.560                          | 881.38             | 493.28             |
| A_68_P22344501 | chr3:95363489-95363533                            | NM_026489:-88           | Hormad1       | PROMOTER               | 1.004                                                        | 1.968                          | 538.50             | 1059.68            | 1.976                          | 506.20             | 1000.35            |
| A_68_P30672049 | chr16:35770608-35770652                           | NM_175111:159           | Hspbap1       | INSIDE                 | 1.004                                                        | 1.495                          | 1440.81            | 2154.42            | 1.501                          | 1329.84            | 1995.72            |
| A_68_P26162181 | chr8:112889462-112889508                          | NM_172916:98608         | Hydin         | INSIDE                 | 1.004                                                        | 2.920                          | 1290.45            | 3767.60            | 2.931                          | 965.91             | 2831.17            |
| A_68_P26586059 | chr9:64989179-64989223                            | NM_008988:205           | Igdcc3        | INSIDE                 | 1.004                                                        | 2.150                          | 1190.39            | 2559.14            | 2.158                          | 1077.88            | 2326.10            |
| A_68_P23229577 | chr4:116180041-116180085                          | NM_008389:-91           | Ipp           | PROMOTER               | 1.004                                                        | 0.605                          | 1228.39            | 742.84             | 0.607                          | 1041.42            | 632.32             |
| A_68_P22201289 | chr3:65469993-65470037                            | NM_001166659:-135       | Lekr1         | PROMOTER               | 1.004                                                        | 3.210                          | 3808.32            | 12225.65           | 3.225                          | 2718.05            | 8764.56            |
| A_68_P23297038 | chr4:129191512-129191557                          | NM_010807:710           | Marcks11      | INSIDE                 | 1.004                                                        | 1.516                          | 2234.44            | 3387.35            | 1.522                          | 1760.81            | 2679.96            |
| A_68_P25210675 | chr7:77491224-77491268                            | NM_009697:14233         | Nr2f2         | DOWNSTREAM             | 1.004                                                        | 1.966                          | 1162.56            | 2285.15            | 1.973                          | 932.26             | 1838.90            |
| A_68_P24984114 | chr7:17532348-17532392                            | NM_001099636:2340       | Pnmal2        | INSIDE                 | 1.004                                                        | 0.346                          | 1548.55            | 536.49             | 0.348                          | 1202.49            | 418.06             |
| A_68_P24117613 | chr5:136210132-136210176                          | NM_008898:45071         | Por           | INSIDE                 | 1.004                                                        | 2.407                          | 583.53             | 1404.36            | 2.416                          | 544.81             | 1316.22            |
| A_68_P20855860 | chr1:178744266-178744310                          | NM_029756:-654          | Sdccag8       | DIVERGENT_PROMOTER     | 1.004                                                        | 1.776                          | 2194.73            | 3897.06            | 1.783                          | 1890.77            | 3371.18            |
| A_68_P24009124 | chr5:115791228-115791272                          | NM_026933:-5            | Triap1        | DIVERGENT_PROMOTER     | 1.004                                                        | 0.522                          | 1318.21            | 688.47             | 0.524                          | 1140.89            | 598.14             |
| A_68_P22766407 | chr4:19635843-19635887                            | NM_177327:276           | Wwp1          | INSIDE                 | 1.004                                                        | 0.469                          | 1326.52            | 622.78             | 0.471                          | 1278.87            | 602.88             |
| A_68_P23577042 | chr5:31502796-31502840                            | NM_001177901:1597       | Zfp513        | INSIDE                 | 1.004                                                        | 3.891                          | 4411.39            | 17165.75           | 3.905                          | 3484.29            | 13606.99           |
| A_68_P29339700 | chr13:114083617-114083661                         |                         |               | Unknown                | 1.004                                                        | 1.401                          | 1770.64            | 2479.85            | 1.406                          | 1500.91            | 2110.57            |
| A_68_P25065735 | chr7:38968873-38968917                            | NM_028166:89            | 1600014C10Rik | INSIDE                 | 1.003                                                        | 0.637                          | 1185.99            | 754.94             | 0.639                          | 909.21             | 580.67             |
| A_68_P27033723 | chr10:28916701-28916745                           | NM_026138:52921         | 6330407J23Rik | INSIDE                 | 1.003                                                        | 1.906                          | 1741.22            | 3318.11            | 1.911                          | 1379.64            | 2636.34            |
| A_68_P22322689 | chr3:89767337-89767382                            | NM_001081182:71         | Atp8b2        | INSIDE                 | 1.003                                                        | 1.651                          | 2632.80            | 4347.19            | 1.657                          | 2094.98            | 3471.03            |
| A_68_P24157328 | chr5:144383397-144383441                          | NM_011182:103           | Cyth3         | INSIDE                 | 1.003                                                        | 1.920                          | 768.05             | 1474.66            | 1.926                          | 649.74             | 1251.70            |
| A_68_P23103729 | chr4:91037950-91037994                            | NM_010486:774           | Elavl1        | INSIDE                 | 1.003                                                        | 0.666                          | 2011.99            | 1339.58            | 0.668                          | 1748.82            | 1168.08            |
| A_68_P25954892 | chr8:73437474-73437518                            | NM_173013:7624          | Mtap1s        | INSIDE                 | 1.003                                                        | 3.008                          | 679.04             | 2042.53            | 3.018                          | 517.91             | 1563.17            |
| A_68_P30346611 | chr15:76011370-76011414                           | NM_201394:14748         | Plec          | INSIDE                 | 1.003                                                        | 3.411                          | 558.28             | 1904.44            | 3.420                          | 481.25             | 1646.09            |
| A_68_P28035919 | chr11:94852484-94852528                           | NM_172261:-19           | Ppp1r9b       | PROMOTER               | 1.003                                                        | 4.171                          | 547.41             | 2283.01            | 4.185                          | 542.52             | 2270.32            |
| A_68_P27674870 | chr11:29415061-29415105                           | NM_001163454:-49        | Prorsd1       | PROMOTER               | 1.003                                                        | 0.668                          | 1582.33            | 1056.42            | 0.670                          | 1375.76            | 921.61             |
| A_68_P26471637 | chr9:44946814-44946858                            | NM_001013390:-288       | Scn4b         | DIVERGENT_PROMOTER     | 1.003                                                        | 0.507                          | 1123.27            | 569.87             | 0.509                          | 1003.86            | 510.81             |
| A_68_P20616238 | chr1:133422989-133423033                          | NM_001081011:928        | Srgap2        | INSIDE                 | 1.003                                                        | 0.711                          | 4267.27            | 3034.24            | 0.713                          | 3794.25            | 2706.89            |
| A_68_P24755317 | chr6:112677286-112677330                          | NM_080448:219952        | Srgap3        | INSIDE                 | 1.003                                                        | 3.678                          | 1760.66            | 6475.38            | 3.687                          | 1153.35            | 4252.87            |
| A_68_P32008255 | chr19:21867281-21867325                           | NM_001033759:14471      | Tmem2         | INSIDE                 | 1.003                                                        | 3.014                          | 1349.89            | 4068.02            | 3.024                          | 1140.00            | 3447.19            |
| A_68_P28280591 | chr12:21423034-21423078                           | NM_011739:241           | Ywhaq         | INSIDE                 | 1.003                                                        | 0.599                          | 1853.43            | 1110.18            | 0.601                          | 1525.07            | 915.92             |
| A_68_P29072927 | chr13:58486285-58486329                           | NM_027335:280           | 2210016F16Rik | INSIDE                 | 1.002                                                        | 1.425                          | 1227.37            | 1748.57            | 1.427                          | 1112.04            | 1586.72            |
| A_68_P21311081 | chr2:69627424-69627468                            | NM_001077684:97         | 4930578N16Rik | INSIDE                 | 1.002                                                        | 1.952                          | 637.55             | 1244.40            | 1.956                          | 569.84             | 1114.80            |
| A_68_P27234934 | chr10:70807560-70807604                           | NM_134007:15            | Cisd1         | INSIDE                 | 1.002                                                        | 2.009                          | 1802.07            | 3620.55            | 2.013                          | 1646.42            | 3314.53            |
| A_68_P23999130 | chr5:114064140-114064194                          | NM_008153:36233         | Cmk1r1        | INSIDE                 | 1.002                                                        | 7.755                          | 1360.90            | 10553.40           | 7.770                          | 1067.04            | 8290.79            |
| A_68_P31458150 | chr18:3337100-3337144                             | NM_001110850:465        | Crem          | INSIDE                 | 1.002                                                        | 1.481                          | 868.72             | 1286.63            | 1.484                          | 802.48             | 1191.11            |
| A_68_P20613816 | chr1:133034598-133034642                          | NM_145508:191           | Dyrk3         | INSIDE                 | 1.002                                                        | 1.349                          | 2436.63            | 3286.10            | 1.351                          | 2270.32            | 3067.97            |
| A_68_P24388787 | chr6:40386026-40386070                            | NM_175528:84            | E330009J07Rik | INSIDE                 | 1.002                                                        | 2.277                          | 486.02             | 1106.42            | 2.281                          | 506.50             | 1155.30            |
| A_68_P23445681 | chr5:3543833-3543877                              | NM_001042501:22         | Fam133b       | INSIDE                 | 1.002                                                        | 0.641                          | 2179.93            | 1396.43            | 0.642                          | 1670.71            | 1071.98            |
| A_68_P21565622 | chr2:118529841-118529885                          | NM_001081971:-163       | Gm1337        | PROMOTER               | 1.002                                                        | 2.729                          | 419.05             | 1143.54            | 2.733                          | 349.67             | 955.76             |
| A_68_P24828004 | chr6:126593418-126593462                          | NM_010595:2379          | Kena1         | INSIDE                 | 1.002                                                        | 1.765                          | 859.28             | 1516.22            | 1.768                          | 709.71             | 1255.05            |
| A_68_P29106491 | chr13:67034356-67034400                           | NM_025547:-370          | Mterfd1       | PROMOTER               | 1.002                                                        | 3.182                          | 413.13             | 1314.68            | 3.187                          | 459.25             | 1463.80            |
| A_68_P26350702 | chr9:21969587-21969631                            | NM_001082532:8319       | Pigyl         | DOWNSTREAM             | 1.002                                                        | 2.022                          | 1436.01            | 2902.98            | 2.026                          | 1195.41            | 2421.70            |
| A_68_P21349792 | chr2:76208467-76208511                            | NM_153405:448           | Rbm45         | INSIDE                 | 1.002                                                        | 1.506                          | 2977.07            | 4484.37            | 1.509                          | 2362.36            | 3564.91            |
| A_68_P29637346 | chr14:59820048-59820093                           | NM_027764:6             | Rcctb1        | INSIDE                 | 1.002                                                        | 1.954                          | 323.30             | 631.79             | 1.958                          | 313.85             | 614.51             |
| A_68_P30363606 | chr15:78813601-78813645                           | NM_001024716:137        | Triobp        | INSIDE                 | 1.002                                                        | 2.081                          | 942.81             | 1961.67            | 2.085                          | 878.42             | 1831.90            |
| A_68_P20820924 | chr1:172105271-172105315                          | NM_133806:-215          | Uap1          | PROMOTER               | 1.002                                                        | 0.575                          | 1316.76            | 756.52             | 0.575                          | 1083.12            | 623.33             |
| A_68_P21149699 | chr2:38527835-38527879                            | ENSMUST00000152645:-200 |               | PROMOTER               | 1.002                                                        | 2.125                          | 837.78             | 1780.58            | 2.130                          | 683.64             | 1456.02            |
| A_68_P32683271 | chrX:133462182-133462226                          | NM_027067:341           | 1700014N06Rik | INSIDE                 | 1.001                                                        | 4.503                          | 1528.00            | 6879.82            | 4.505                          | 686.58             | 3092.99            |
| A_68_P24760449 | chr6:113554951-113554995                          | NM_133937:207           | 6720456B07Rik | INSIDE                 | 1.001                                                        | 0.578                          | 1938.36            | 1120.30            | 0.579                          | 1620.54            | 937.64             |

| ProbeName      | Target position of probe on CpG island microarray | TargetID              | GeneSymbol    | CpG island Description | Ratio of relative methylation (TiO <sub>2</sub> -NP/Vehicle) | Sham group                     |                    |                    | TiO <sub>2</sub> -H group      |                    |                    |
|----------------|---------------------------------------------------|-----------------------|---------------|------------------------|--------------------------------------------------------------|--------------------------------|--------------------|--------------------|--------------------------------|--------------------|--------------------|
|                |                                                   |                       |               |                        |                                                              | Relative methylation (Cy5/Cy3) | Cy3 signal (Input) | Cy5 signal (MeDIP) | Relative methylation (Cy5/Cy3) | Cy3 signal (Input) | Cy5 signal (MeDIP) |
| A_68_P25708739 | chr8:23123882-23123926                            | NM_007511:46642       | Atp7b         | INSIDE                 | 1.001                                                        | 1.710                          | 977.14             | 1670.45            | 1.712                          | 846.17             | 1448.32            |
| A_68_P31933858 | chr19:6306849-6306893                             | NM_001033342:414      | Cdc42bpg      | INSIDE                 | 1.001                                                        | 1.793                          | 1243.97            | 2230.48            | 1.795                          | 1069.75            | 1920.01            |
| A_68_P22355190 | chr3:97413997-97414041                            | NM_026539:95          | Chd11         | INSIDE                 | 1.001                                                        | 2.590                          | 611.24             | 1582.88            | 2.592                          | 610.65             | 1582.68            |
| A_68_P27281410 | chr10:79627471-79627515                           | NM_007705:-3093       | Cirbp         | PROMOTER               | 1.001                                                        | 1.936                          | 1128.46            | 2184.35            | 1.938                          | 903.92             | 1751.96            |
| A_68_P30507167 | chr16:3908948-3908992                             | NM_029738:-38         | Cluap1        | DIVERGENT_PROMOTER     | 1.001                                                        | 0.583                          | 1104.12            | 644.07             | 0.584                          | 908.10             | 530.47             |
| A_68_P27952486 | chr11:79894373-79894417                           | NM_018776:63          | Crlf3         | INSIDE                 | 1.001                                                        | 1.979                          | 1368.96            | 2708.73            | 1.980                          | 1208.10            | 2392.53            |
| A_68_P22954048 | chr4:59016217-59016261                            | NM_001033165:174      | Dnajc25       | INSIDE                 | 1.001                                                        | 1.826                          | 408.85             | 746.45             | 1.828                          | 358.06             | 654.36             |
| A_68_P25564248 | chr7:144390170-144390214                          | NM_001113414:115936   | Ebf3          | INSIDE                 | 1.001                                                        | 4.113                          | 3266.90            | 13437.90           | 4.119                          | 2477.94            | 10206.66           |
| A_68_P26617704 | chr9:70504900-70504944                            | NM_172772:59          | Fam63b        | INSIDE                 | 1.001                                                        | 2.570                          | 697.55             | 1792.65            | 2.573                          | 769.23             | 1979.39            |
| A_68_P29928896 | chr14:117324667-117324711                         | NM_001079844:152      | Gpc6          | INSIDE                 | 1.001                                                        | 1.768                          | 1998.31            | 3532.86            | 1.769                          | 1657.61            | 2932.72            |
| A_68_P27568543 | chr11:6344478-6344522                             | NM_029938:-54         | H2afv         | PROMOTER               | 1.001                                                        | 0.412                          | 1695.25            | 698.80             | 0.413                          | 1425.40            | 588.36             |
| A_68_P29942852 | chr14:119537211-119537255                         | NM_015820:-254        | Hsf6st3       | PROMOTER               | 1.001                                                        | 2.083                          | 685.49             | 1428.16            | 2.084                          | 615.86             | 1283.75            |
| A_68_P32746465 | chrX:148238176-148238221                          | NM_021523:374         | Huwe1         | INSIDE                 | 1.001                                                        | 2.184                          | 3499.70            | 7644.24            | 2.186                          | 1699.28            | 3714.16            |
| A_68_P20739568 | chr1:157584694-157584738                          | NM_010712:4441        | Lhx4          | INSIDE                 | 1.001                                                        | 0.634                          | 1644.18            | 1041.84            | 0.634                          | 1262.79            | 801.23             |
| A_68_P26537376 | chr9:56482845-56482889                            | NM_181074:50194       | Lingo1        | INSIDE                 | 1.001                                                        | 0.537                          | 1729.64            | 929.27             | 0.538                          | 1418.17            | 762.47             |
| A_68_P20348301 | chr1:74438711-74438755                            | NR_029743:-2151       | Mir26b        | PROMOTER               | 1.001                                                        | 5.814                          | 793.29             | 4612.24            | 5.821                          | 763.86             | 4446.28            |
| A_68_P24191791 | chr5:151397312-151397356                          | NM_133898:-234        | N4bp211       | PROMOTER               | 1.001                                                        | 1.664                          | 588.10             | 978.45             | 1.666                          | 568.62             | 947.41             |
| A_68_P31866221 | chr18:80894853-80894897                           | NM_001164111:10038    | Nfatc1        | INSIDE                 | 1.001                                                        | 1.650                          | 1020.30            | 1683.16            | 1.652                          | 770.54             | 1272.96            |
| A_68_P29054897 | chr13:55516522-55516566                           | NM_029303:49          | Pfn3          | INSIDE                 | 1.001                                                        | 0.520                          | 1325.73            | 689.16             | 0.520                          | 1006.69            | 523.58             |
| A_68_P27568687 | chr11:6375581-6375625                             | NM_011221:318         | Purb          | INSIDE                 | 1.001                                                        | 1.893                          | 476.34             | 901.68             | 1.895                          | 503.04             | 953.43             |
| A_68_P21782731 | chr2:158236154-158236198                          | NM_177658:588         | Ralgapb       | INSIDE                 | 1.001                                                        | 2.788                          | 2187.42            | 6099.31            | 2.790                          | 1832.50            | 5112.94            |
| A_68_P31138857 | chr17:31433598-31433642                           | NM_153062:1193        | Slc37a1       | INSIDE                 | 1.001                                                        | 1.916                          | 1401.63            | 2684.97            | 1.918                          | 1134.51            | 2176.18            |
| A_68_P22543384 | chr3:133208009-133208053                          | NM_001040400:-676     | Tet2          | PROMOTER               | 1.001                                                        | 2.501                          | 932.77             | 2333.05            | 2.505                          | 819.82             | 2053.37            |
| A_68_P22820140 | chr4:32326028-32326072                            | ENSMUST00000149201:-1 |               | PROMOTER               | 1.001                                                        | 1.440                          | 1105.42            | 1592.01            | 1.441                          | 1016.43            | 1464.60            |
| A_68_P20562758 | chr1:122499691-122499735                          | NM_010133:649         | En1           | INSIDE                 | 1.000                                                        | 2.775                          | 1810.25            | 5024.30            | 2.774                          | 1534.25            | 4256.35            |
| A_68_P26804353 | chr9:106550228-106550272                          | NM_001160353:8190     | Grm2          | INSIDE                 | 1.000                                                        | 1.849                          | 396.78             | 733.67             | 1.849                          | 337.51             | 624.06             |
| A_68_P31053794 | chr17:12962250-12962294                           | NM_010515:300         | Igf2r         | INSIDE                 | 1.000                                                        | 2.114                          | 812.96             | 1718.60            | 2.115                          | 748.12             | 1581.99            |
| A_68_P27340038 | chr10:90564802-90564859                           | NM_027078:19047       | Ikbip         | INSIDE                 | 1.000                                                        | 4.183                          | 770.88             | 3224.39            | 4.185                          | 644.40             | 2696.50            |
| A_68_P29334869 | chr13:113254155-113254199                         | NM_010560:-101        | Il6st         | PROMOTER               | 1.000                                                        | 2.473                          | 720.39             | 1781.77            | 2.473                          | 643.17             | 1590.61            |
| A_68_P32147196 | chr19:47089352-47089396                           | NM_146100:187         | Ina           | INSIDE                 | 1.000                                                        | 1.629                          | 591.63             | 964.03             | 1.630                          | 530.30             | 864.16             |
| A_68_P25111232 | chr7:56502025-56502069                            | NM_175272:488         | Nav2          | INSIDE                 | 1.000                                                        | 1.904                          | 1561.73            | 2973.72            | 1.905                          | 1228.89            | 2340.61            |
| A_68_P30165311 | chr15:41279202-41279246                           | NM_001130166:197      | Oxr1          | INSIDE                 | 1.000                                                        | 1.483                          | 1196.71            | 1774.96            | 1.483                          | 1051.71            | 1559.45            |
| A_68_P20641451 | chr1:137662928-137662972                          | NM_013750:289         | Phlda3        | INSIDE                 | 1.000                                                        | 1.648                          | 653.33             | 1076.81            | 1.648                          | 647.38             | 1066.93            |
| A_68_P24984543 | chr7:17612915-17612959                            | NM_011155:327         | Ppp5c         | INSIDE                 | 1.000                                                        | 2.526                          | 813.45             | 2055.03            | 2.526                          | 786.34             | 1986.38            |
| A_68_P25090467 | chr7:52241632-52241676                            | NM_019830:48          | Prmt1         | INSIDE                 | 1.000                                                        | 0.563                          | 2673.91            | 1505.32            | 0.563                          | 2064.17            | 1161.69            |
| A_68_P31255961 | chr17:56556971-56557015                           | NM_011218:58911       | Ptprs         | INSIDE                 | 1.000                                                        | 2.726                          | 2495.12            | 6800.53            | 2.726                          | 1799.25            | 4905.24            |
| A_68_P26822090 | chr9:110034578-110034622                          | NM_009211:73          | Smarcc1       | INSIDE                 | 1.000                                                        | 0.587                          | 1716.41            | 1007.15            | 0.587                          | 1489.01            | 873.48             |
| A_68_P26752043 | chr9:97266499-97266543                            | NM_030219:3857        | Trim42        | INSIDE                 | 1.000                                                        | 3.580                          | 2124.53            | 7605.45            | 3.580                          | 1367.72            | 4896.73            |
| A_68_P21911428 | chr2:181316733-181316777                          | NM_026765:-76         | Uck1          | PROMOTER               | 1.000                                                        | 0.550                          | 2365.67            | 1300.63            | 0.550                          | 1911.27            | 1051.32            |
| A_68_P24638867 | chr6:91361318-91361362                            | NM_009527:23          | Wnt7a         | INSIDE                 | 1.000                                                        | 0.534                          | 1200.04            | 640.63             | 0.534                          | 943.05             | 503.65             |
| A_68_P21622216 | chr2:128769433-128769477                          | NM_020594:302         | Zc3h8         | INSIDE                 | 1.000                                                        | 0.661                          | 3469.05            | 2291.63            | 0.661                          | 2788.06            | 1841.73            |
| A_68_P31159051 | chr17:35495987-35496031                           | M19687:92193          |               | INSIDE                 | 1.000                                                        | 1.623                          | 852.55             | 1383.39            | 1.622                          | 692.14             | 1122.72            |
| A_68_P31632850 | chr18:38398968-38399012                           | NR_015475:10862       | 1700086O06Rik | INSIDE                 | 0.999                                                        | 2.657                          | 1930.10            | 5128.40            | 2.653                          | 1700.15            | 4510.89            |
| A_68_P22888515 | chr4:46402231-46402275                            | NM_029086:43          | 5830415F09Rik | INSIDE                 | 0.999                                                        | 0.586                          | 3453.67            | 2025.56            | 0.586                          | 2807.81            | 1645.52            |
| A_68_P25509658 | chr7:135381901-135381945                          | NM_177001:-377        | 9130023H24Rik | PROMOTER               | 0.999                                                        | 1.842                          | 1505.89            | 2773.86            | 1.840                          | 1308.44            | 2406.96            |
| A_68_P26397637 | chr9:30728994-30729041                            | NM_001024139:1020     | Adams15       | INSIDE                 | 0.999                                                        | 2.179                          | 523.50             | 1140.66            | 2.176                          | 427.05             | 929.30             |
| A_68_P25589622 | chr7:148748160-148748204                          | NM_007459:104         | Ap2a2         | INSIDE                 | 0.999                                                        | 2.413                          | 690.05             | 1665.06            | 2.411                          | 645.41             | 1556.04            |
| A_68_P28517159 | chr12:70993954-70993998                           | NM_178628:-115        | At1           | PROMOTER               | 0.999                                                        | 2.421                          | 257.97             | 624.52             | 2.419                          | 228.35             | 552.45             |
| A_68_P28183246 | chr11:120098017-120098061                         | NM_198423:3778        | Bahcc1        | INSIDE                 | 0.999                                                        | 0.671                          | 2111.42            | 1416.75            | 0.670                          | 1828.52            | 1225.29            |
| A_68_P21751444 | chr2:152656729-152656773                          | NM_009743:668         | Bcl2l1        | INSIDE                 | 0.999                                                        | 0.483                          | 1434.21            | 692.88             | 0.483                          | 1306.97            | 630.63             |
| A_68_P25951052 | chr8:72839724-72839768                            | NM_001163282:73       | Gdf1          | INSIDE                 | 0.999                                                        | 0.549                          | 1349.95            | 741.73             | 0.549                          | 1069.18            | 586.87             |



| ProbeName      | Target position of probe on CpG island microarray | TargetID                 | GeneSymbol    | CpG island Description | Ratio of relative methylation (TiO <sub>2</sub> -NP/Vehicle) | Sham group                     |                    |                    | TiO <sub>2</sub> -H group      |                    |                    |
|----------------|---------------------------------------------------|--------------------------|---------------|------------------------|--------------------------------------------------------------|--------------------------------|--------------------|--------------------|--------------------------------|--------------------|--------------------|
|                |                                                   |                          |               |                        |                                                              | Relative methylation (Cy5/Cy3) | Cy3 signal (Input) | Cy5 signal (MeDIP) | Relative methylation (Cy5/Cy3) | Cy3 signal (Input) | Cy5 signal (MeDIP) |
| A_68_P27278193 | chr10:79138046-79138092                           | NM_148934:5914           | Gm16517       | INSIDE                 | 0.999                                                        | 2.462                          | 415.58             | 1023.07            | 2.459                          | 315.78             | 776.61             |
| A_68_P27279643 | chr10:79371605-79371649                           | NM_001163276:57          | Med16         | INSIDE                 | 0.999                                                        | 3.411                          | 4547.19            | 15510.39           | 3.409                          | 4065.17            | 13858.61           |
| A_68_P23260200 | chr4:122673850-122673894                          | NM_008506:531            | Myc11         | INSIDE                 | 0.999                                                        | 2.358                          | 2423.27            | 5714.37            | 2.357                          | 2125.77            | 5009.77            |
| A_68_P30497261 | chr15:102156542-102156586                         | NM_027044:18             | Pfdn5         | INSIDE                 | 0.999                                                        | 0.647                          | 2071.67            | 1340.46            | 0.646                          | 1745.19            | 1127.84            |
| A_68_P26750484 | chr9:96919484-96919528                            | NM_145134:-732           | Spsb4         | PROMOTER               | 0.999                                                        | 2.141                          | 1284.14            | 2749.85            | 2.139                          | 1093.79            | 2340.05            |
| A_68_P27845269 | chr11:60692535-60692579                           | NM_001168507:-16         | Tmem11        | PROMOTER               | 0.999                                                        | 0.550                          | 1323.77            | 727.90             | 0.549                          | 969.23             | 532.31             |
| A_68_P23240958 | chr4:118214708-118214752                          | NM_172383:1601           | Tmem125       | INSIDE                 | 0.999                                                        | 2.109                          | 1245.79            | 2627.70            | 2.107                          | 992.87             | 2092.00            |
| A_68_P24067083 | chr5:125956377-125956421                          | NM_032010:156            | Aacs          | INSIDE                 | 0.998                                                        | 0.603                          | 1336.15            | 805.51             | 0.602                          | 1025.60            | 616.95             |
| A_68_P30762452 | chr16:52452809-52452853                           | NM_009655:280            | Alcam         | INSIDE                 | 0.998                                                        | 0.339                          | 1713.94            | 580.70             | 0.338                          | 1668.29            | 564.12             |
| A_68_P23576264 | chr5:31371183-31371228                            | NM_023525:14022          | Cad           | INSIDE                 | 0.998                                                        | 3.213                          | 598.79             | 1923.96            | 3.207                          | 454.70             | 1458.27            |
| A_68_P27924577 | chr11:74981143-74981187                           | NM_001098203:490         | Hic1          | INSIDE                 | 0.998                                                        | 2.270                          | 565.78             | 1284.39            | 2.267                          | 434.21             | 984.21             |
| A_68_P23333956 | chr4:135998848-135998894                          | NM_008309:19432          | Htr1d         | INSIDE                 | 0.998                                                        | 2.131                          | 351.60             | 749.42             | 2.127                          | 252.44             | 536.90             |
| A_68_P31829406 | chr18:74223918-74223962                           | NM_172632:663            | Mapk4         | INSIDE                 | 0.998                                                        | 1.442                          | 2017.22            | 2908.79            | 1.439                          | 1555.75            | 2239.24            |
| A_68_P30368654 | chr15:79634541-79634585                           | NM_030689:577            | Nptxr         | INSIDE                 | 0.998                                                        | 1.960                          | 489.40             | 959.03             | 1.956                          | 468.66             | 916.49             |
| A_68_P29116252 | chr13:69672648-69672692                           | NM_001169131:72          | Papd7         | INSIDE                 | 0.998                                                        | 3.351                          | 553.07             | 1853.12            | 3.345                          | 451.07             | 1509.02            |
| A_68_P23576466 | chr5:31397923-31397967                            | NM_011773:-2044          | Sle30a3       | PROMOTER               | 0.998                                                        | 1.857                          | 619.34             | 1150.15            | 1.854                          | 570.84             | 1058.10            |
| A_68_P29238030 | chr13:95746505-95746549                           | NM_172590:224            | Wdr41         | INSIDE                 | 0.998                                                        | 1.934                          | 361.03             | 698.29             | 1.929                          | 334.92             | 646.20             |
| A_68_P29614458 | chr14:55433137-55433182                           | ENSMUST00000095853:-2164 |               | PROMOTER               | 0.998                                                        | 2.005                          | 1026.89            | 2058.78            | 2.001                          | 872.72             | 1745.93            |
| A_68_P24973686 | chr7:13514022-13514066                            | NM_029809:1280           | 2310014L17Rik | INSIDE                 | 0.997                                                        | 1.983                          | 2957.50            | 5863.54            | 1.978                          | 2257.46            | 4464.18            |
| A_68_P28098902 | chr11:105849980-105850024                         | NM_009598:13481          | Ace           | INSIDE                 | 0.997                                                        | 3.371                          | 2790.42            | 9406.29            | 3.361                          | 1956.84            | 6576.26            |
| A_68_P28751739 | chr12:113912106-113912150                         | NM_001165894:359         | Akt1          | INSIDE                 | 0.997                                                        | 1.867                          | 988.87             | 1845.84            | 1.862                          | 865.73             | 1611.66            |
| A_68_P31500013 | chr18:12464044-12464088                           | NM_001190371:163         | Ankrd29       | INSIDE                 | 0.997                                                        | 0.530                          | 1194.05            | 633.15             | 0.529                          | 906.64             | 479.31             |
| A_68_P20722814 | chr1:154614048-154614092                          | NM_026369:399            | Arpc5         | INSIDE                 | 0.997                                                        | 0.508                          | 1445.23            | 733.62             | 0.506                          | 1186.65            | 600.79             |
| A_68_P23332635 | chr4:135762482-135762526                          | NM_001008232:225         | Asap3         | INSIDE                 | 0.997                                                        | 1.446                          | 2295.55            | 3318.93            | 1.441                          | 1657.39            | 2388.62            |
| A_68_P20294242 | chr1:64781496-64781540                            | NM_001042659:2806        | Fzd5          | INSIDE                 | 0.997                                                        | 2.794                          | 629.47             | 1758.50            | 2.784                          | 552.56             | 1538.30            |
| A_68_P28553888 | chr12:77518476-77518520                           | NM_001163103:-87         | Gm70          | PROMOTER               | 0.997                                                        | 1.733                          | 679.79             | 1178.21            | 1.727                          | 697.08             | 1204.08            |
| A_68_P31259627 | chr17:57162083-57162127                           | NM_010613:8826           | Khsrp         | INSIDE                 | 0.997                                                        | 2.439                          | 1125.22            | 2744.81            | 2.431                          | 860.59             | 2092.42            |
| A_68_P30365873 | chr15:79178383-79178427                           | NM_010755:297            | Maff          | INSIDE                 | 0.997                                                        | 1.377                          | 3938.23            | 5423.92            | 1.374                          | 2859.41            | 3928.10            |
| A_68_P30370811 | chr15:80042269-80042313                           | NM_010795:38140          | Mgat3         | INSIDE                 | 0.997                                                        | 2.631                          | 865.28             | 2276.38            | 2.622                          | 728.36             | 1909.78            |
| A_68_P29116249 | chr13:69672357-69672401                           | NM_001169131:364         | Papd7         | INSIDE                 | 0.997                                                        | 2.373                          | 430.14             | 1020.63            | 2.366                          | 473.01             | 1119.05            |
| A_68_P24980577 | chr7:16858327-16858371                            | NM_001136270:693         | Prr24         | INSIDE                 | 0.997                                                        | 1.584                          | 735.36             | 1165.10            | 1.580                          | 698.37             | 1103.34            |
| A_68_P32071925 | chr19:32832040-32832084                           | NM_008960:-4             | Pten          | PROMOTER               | 0.997                                                        | 0.393                          | 2158.87            | 847.85             | 0.392                          | 1626.33            | 636.79             |
| A_68_P26872699 | chr9:119395083-119395128                          | NM_021544:93029          | Scn5a         | INSIDE                 | 0.997                                                        | 6.691                          | 1675.87            | 11213.76           | 6.669                          | 1240.89            | 8275.00            |
| A_68_P28054174 | chr11:97914443-97914487                           | NM_146028:312            | Stac2         | INSIDE                 | 0.997                                                        | 1.516                          | 1351.03            | 2048.05            | 1.511                          | 1116.39            | 1687.37            |
| A_68_P21910189 | chr2:181100664-181100708                          | NM_001048148:559         | Zgpat         | INSIDE                 | 0.997                                                        | 1.533                          | 1047.54            | 1605.55            | 1.528                          | 912.86             | 1394.56            |
| A_68_P21967925 | chr3:17686263-17686307                            | NR_033490:-3636          | 2610100L16Rik | PROMOTER               | 0.996                                                        | 1.832                          | 700.79             | 1283.61            | 1.824                          | 671.51             | 1224.61            |
| A_68_P26809314 | chr9:107429770-107429814                          | NM_001174047:127582      | Caena2d2      | INSIDE                 | 0.996                                                        | 2.280                          | 4757.54            | 10847.27           | 2.270                          | 3392.77            | 7701.93            |
| A_68_P23193626 | chr4:107596160-107596204                          | NM_009949:12             | Cpt2          | INSIDE                 | 0.996                                                        | 0.568                          | 1778.95            | 1010.03            | 0.566                          | 1435.54            | 812.00             |
| A_68_P27386041 | chr10:98726685-98726729                           | NM_026268:842            | Dusp6         | INSIDE                 | 0.996                                                        | 1.374                          | 1779.75            | 2445.20            | 1.369                          | 1581.44            | 2164.98            |
| A_68_P27479722 | chr10:116585133-116585177                         | NM_177798:376            | Frs2          | INSIDE                 | 0.996                                                        | 1.876                          | 4085.68            | 7664.93            | 1.868                          | 3157.32            | 5897.78            |
| A_68_P27790976 | chr11:50673440-50673484                           | NM_173372:9276           | Grm6          | INSIDE                 | 0.996                                                        | 3.290                          | 1696.71            | 5582.56            | 3.277                          | 1165.85            | 3820.51            |
| A_68_P28727296 | chr12:109556884-109556928                         | NM_001044380:12427       | Hhip11        | INSIDE                 | 0.996                                                        | 1.574                          | 2623.55            | 4129.92            | 1.567                          | 2017.20            | 3161.77            |
| A_68_P21261715 | chr2:60800332-60800376                            | NM_020296:907            | Rbms1         | INSIDE                 | 0.996                                                        | 0.371                          | 3510.84            | 1303.82            | 0.370                          | 1038.29            | 384.24             |
| A_68_P21297863 | chr2:67403728-67403772                            |                          | Unknown       |                        | 0.996                                                        | 2.896                          | 374.84             | 1085.70            | 2.886                          | 345.96             | 998.55             |
| A_68_P32565208 | chrX:98893525-98893573                            | ENSMUST00000073812:-6359 |               | PROMOTER               | 0.996                                                        | 4.092                          | 858.36             | 3512.21            | 4.077                          | 365.29             | 1489.31            |
| A_68_P23562832 | chr5:28785049-28785093                            | NR_015562:-8453          | 9530036O11Rik | PROMOTER               | 0.995                                                        | 1.861                          | 900.53             | 1675.67            | 1.852                          | 815.55             | 1510.14            |
| A_68_P23315555 | chr4:132617504-132617548                          | NM_146155:50106          | Ahdcl1        | INSIDE                 | 0.995                                                        | 2.198                          | 2866.16            | 6300.82            | 2.187                          | 2036.49            | 4454.39            |
| A_68_P31304169 | chr17:66426588-66426632                           | NM_001025572:-224        | Ankrd12       | PROMOTER               | 0.995                                                        | 1.367                          | 2946.48            | 4027.20            | 1.360                          | 2267.77            | 3083.51            |
| A_68_P31015191 | chr17:5189996-5190040                             | NM_001085355:194945      | Arid1b        | INSIDE                 | 0.995                                                        | 1.921                          | 867.83             | 1667.48            | 1.911                          | 812.52             | 1552.65            |
| A_68_P26505535 | chr9:50576596-50576640                            | NM_198675:-276           | Fdxacb1       | INSIDE                 | 0.995                                                        | 1.526                          | 1064.15            | 1623.66            | 1.518                          | 972.54             | 1475.91            |
| A_68_P30673113 | chr16:35983288-35983332                           | NM_008465:-138           | Kpna1         | PROMOTER               | 0.995                                                        | 2.069                          | 641.80             | 1328.17            | 2.060                          | 610.60             | 1257.66            |

| ProbeName      | Target position of probe on CpG island microarray | TargetID                | GeneSymbol    | CpG island Description | Ratio of relative methylation (TiO <sub>2</sub> -NP/Vehicle) | Sham group                     |                    |                    | TiO <sub>2</sub> -H group      |                    |                    |
|----------------|---------------------------------------------------|-------------------------|---------------|------------------------|--------------------------------------------------------------|--------------------------------|--------------------|--------------------|--------------------------------|--------------------|--------------------|
|                |                                                   |                         |               |                        |                                                              | Relative methylation (Cy5/Cy3) | Cy3 signal (Input) | Cy5 signal (MeDIP) | Relative methylation (Cy5/Cy3) | Cy3 signal (Input) | Cy5 signal (MeDIP) |
| A_68_P27528047 | chr10:125403454-125403498                         | NM_177152:202           | Lrig3         | INSIDE                 | 0.995                                                        | 1.897                          | 1111.46            | 2108.73            | 1.888                          | 1074.76            | 2028.77            |
| A_68_P22569094 | chr3:138152230-138152274                          | NM_175224:94            | Metap1        | INSIDE                 | 0.995                                                        | 0.558                          | 1421.82            | 793.85             | 0.556                          | 1294.07            | 719.08             |
| A_68_P23230187 | chr4:116299629-116299673                          | NM_001081475:452        | Nasp          | INSIDE                 | 0.995                                                        | 2.444                          | 818.05             | 1998.97            | 2.431                          | 775.57             | 1885.28            |
| A_68_P21322071 | chr2:71711579-71711623                            | NM_172665:272           | Pdk1          | INSIDE                 | 0.995                                                        | 1.869                          | 408.41             | 763.22             | 1.860                          | 451.21             | 839.30             |
| A_68_P29701214 | chr14:70828882-70828926                           | NM_021308:-3            | Piwil2        | PROMOTER               | 0.995                                                        | 2.654                          | 1207.94            | 3206.23            | 2.641                          | 914.92             | 2416.33            |
| A_68_P20412582 | chr1:88421547-88421591                            | NM_008972:-1742         | Ptma          | PROMOTER               | 0.995                                                        | 0.620                          | 1245.87            | 771.94             | 0.616                          | 971.73             | 598.81             |
| A_68_P25957632 | chr8:74108446-74108490                            | NM_011977:15643         | Slc27a1       | INSIDE                 | 0.995                                                        | 1.632                          | 1076.80            | 1757.14            | 1.623                          | 876.30             | 1422.62            |
| A_68_P24983334 | chr7:17396097-17396141                            | NM_001039878:-5119      | Strn4         | PROMOTER               | 0.995                                                        | 1.522                          | 1647.32            | 2507.44            | 1.515                          | 1366.68            | 2070.67            |
| A_68_P24757154 | chr6:112996444-112996488                          | NM_008188:146           | Thumpd3       | INSIDE                 | 0.995                                                        | 1.737                          | 4296.78            | 7462.07            | 1.729                          | 3293.29            | 5693.23            |
| A_68_P27017611 | chr10:25798724-25798768                           | NM_029881:112           | Tmem200a      | INSIDE                 | 0.995                                                        | 2.407                          | 411.15             | 989.66             | 2.395                          | 378.57             | 906.74             |
| A_68_P28272753 | chr12:17888729-17888773                           | ENSMUST00000169996:-252 |               | PROMOTER               | 0.995                                                        | 3.529                          | 636.40             | 2245.90            | 3.512                          | 605.21             | 2125.64            |
| A_68_P23319352 | chr4:133309797-133309841                          | NM_001080819:-292       | Arid1a        | PROMOTER               | 0.994                                                        | 2.271                          | 259.06             | 588.20             | 2.257                          | 268.11             | 605.25             |
| A_68_P26020866 | chr8:87163478-87163522                            | NM_007578:224238        | Caena1a       | INSIDE                 | 0.994                                                        | 3.412                          | 181.89             | 620.63             | 3.391                          | 273.43             | 927.22             |
| A_68_P25392336 | chr7:112583704-112583750                          | NM_007627:9393          | Cekbr         | INSIDE                 | 0.994                                                        | 1.993                          | 772.15             | 1538.80            | 1.982                          | 691.06             | 1369.49            |
| A_68_P21080069 | chr2:26483908-26483952                            | NM_019833:-46           | Fam69b        | PROMOTER               | 0.994                                                        | 2.648                          | 1676.41            | 4438.84            | 2.632                          | 1413.20            | 3719.47            |
| A_68_P23980412 | chr5:110973428-110973472                          | NM_198306:87            | Galn9         | INSIDE                 | 0.994                                                        | 2.402                          | 1560.80            | 3749.46            | 2.389                          | 1323.60            | 3162.07            |
| A_68_P22448207 | chr3:115954695-115954739                          | NM_022427:1686          | Gpr88         | INSIDE                 | 0.994                                                        | 3.688                          | 1626.77            | 5999.23            | 3.666                          | 1173.73            | 4302.61            |
| A_68_P30473862 | chr15:98087209-98087253                           | NM_027304:508           | H1fnt         | INSIDE                 | 0.994                                                        | 2.372                          | 828.18             | 1964.16            | 2.357                          | 742.30             | 1749.38            |
| A_68_P20146151 | chr1:36125666-36125710                            | NM_015818:444           | Hs6st1        | INSIDE                 | 0.994                                                        | 1.782                          | 1059.26            | 1887.91            | 1.771                          | 864.25             | 1530.45            |
| A_68_P20058117 | chr1:17081719-17081763                            | NM_020604:6230          | Jph1          | INSIDE                 | 0.994                                                        | 2.415                          | 432.87             | 1045.23            | 2.400                          | 437.87             | 1050.67            |
| A_68_P30365872 | chr15:79178280-79178324                           | NM_010755:195           | Maff          | INSIDE                 | 0.994                                                        | 1.455                          | 860.84             | 1252.58            | 1.447                          | 853.34             | 1234.36            |
| A_68_P27279642 | chr10:79371508-79371552                           | NM_001163276:153        | Med16         | INSIDE                 | 0.994                                                        | 1.480                          | 5316.32            | 7868.73            | 1.472                          | 4037.00            | 5940.95            |
| A_68_P31918144 | chr19:3575377-3575421                             | NM_001164159:351        | Ppp6r3        | INSIDE                 | 0.994                                                        | 2.928                          | 226.67             | 663.80             | 2.910                          | 224.20             | 652.39             |
| A_68_P30577449 | chr16:18088865-18088909                           | NM_011172:397           | Prodh         | INSIDE                 | 0.994                                                        | 0.663                          | 3212.32            | 2130.88            | 0.660                          | 2666.40            | 1758.78            |
| A_68_P26145652 | chr8:110111876-110111920                          | NM_010817:484           | Psmc7         | INSIDE                 | 0.994                                                        | 1.754                          | 1356.42            | 2379.29            | 1.744                          | 984.47             | 1716.67            |
| A_68_P29094190 | chr13:63669109-63669153                           | NM_008957:-2302         | Ptch1         | PROMOTER               | 0.994                                                        | 0.643                          | 1264.45            | 812.72             | 0.639                          | 1079.27            | 689.55             |
| A_68_P20826099 | chr1:173032693-173032737                          |                         | Unknown       |                        | 0.994                                                        | 1.419                          | 4354.08            | 6179.40            | 1.410                          | 3366.74            | 4747.43            |
| A_68_P23236238 | chr4:117402055-117402099                          | ENSMUST00000119463:-172 |               | PROMOTER               | 0.994                                                        | 3.803                          | 377.85             | 1436.81            | 3.780                          | 332.07             | 1255.28            |
| A_68_P23358590 | chr4:140071282-140071326                          | NM_001112723:133367     | Arhgef10l     | INSIDE                 | 0.993                                                        | 2.016                          | 607.45             | 1224.71            | 2.003                          | 460.13             | 921.44             |
| A_68_P23069061 | chr4:84191429-84191473                            | NM_172870:129540        | Bnc2          | INSIDE                 | 0.993                                                        | 2.050                          | 730.17             | 1496.77            | 2.035                          | 684.91             | 1393.86            |
| A_68_P20162792 | chr1:38954736-38954780                            | NM_145142:247           | Chst10        | INSIDE                 | 0.993                                                        | 1.434                          | 1466.35            | 2103.29            | 1.425                          | 1325.92            | 1889.34            |
| A_68_P21566331 | chr2:118640254-118640305                          | NM_026412:541           | D2Ertd750c    | INSIDE                 | 0.993                                                        | 3.780                          | 189.64             | 716.82             | 3.754                          | 202.56             | 760.45             |
| A_68_P20884849 | chr1:183950484-183950528                          | NM_001083120:-395       | Enah          | PROMOTER               | 0.993                                                        | 2.101                          | 3415.11            | 7174.11            | 2.087                          | 2834.83            | 5915.61            |
| A_68_P25095110 | chr7:53050321-53050365                            | NM_001005511:11026      | Lmtk3         | INSIDE                 | 0.993                                                        | 1.941                          | 685.01             | 1329.93            | 1.928                          | 599.14             | 1155.30            |
| A_68_P26164574 | chr8:113263014-113263058                          | NM_198625:17653         | Mtss1l        | INSIDE                 | 0.993                                                        | 2.608                          | 774.49             | 2019.64            | 2.591                          | 637.24             | 1650.87            |
| A_68_P32065927 | chr19:31739233-31739277                           | NM_011160:-394          | Prkg1         | PROMOTER               | 0.993                                                        | 2.083                          | 7892.51            | 16437.63           | 2.067                          | 5044.98            | 10428.48           |
| A_68_P27949797 | chr11:79405082-79405126                           | NM_175543:391           | Rab11fip4     | INSIDE                 | 0.993                                                        | 3.847                          | 243.01             | 934.92             | 3.821                          | 240.95             | 920.65             |
| A_68_P27804897 | chr11:53277337-53277381                           | NM_027917:6652          | Shroom1       | INSIDE                 | 0.993                                                        | 3.196                          | 478.62             | 1529.53            | 3.173                          | 432.98             | 1373.82            |
| A_68_P30425030 | chr15:89240388-89240432                           | NM_001162882:284        | 1700007E06Rik | INSIDE                 | 0.992                                                        | 4.670                          | 1754.18            | 8192.88            | 4.632                          | 1273.24            | 5897.68            |
| A_68_P28990875 | chr13:43655667-43655711                           | NM_001081059:-128       | Ccdc90a       | PROMOTER               | 0.992                                                        | 1.488                          | 2361.83            | 3513.87            | 1.476                          | 1911.69            | 2822.43            |
| A_68_P26055365 | chr8:93352513-93352557                            | NM_177224:-199          | Chd9          | PROMOTER               | 0.992                                                        | 2.663                          | 568.34             | 1513.73            | 2.642                          | 535.13             | 1413.73            |
| A_68_P32982272 | chr5:134998625-134998669                          | NM_001039162:29658      | Clip2         | INSIDE                 | 0.992                                                        | 2.331                          | 2254.36            | 5255.17            | 2.312                          | 1835.41            | 4244.26            |
| A_68_P27284503 | chr10:80101463-80101507                           | NM_001159591:9084       | Csnk1g2       | INSIDE                 | 0.992                                                        | 2.078                          | 1387.24            | 2882.12            | 2.061                          | 995.37             | 2051.67            |
| A_68_P22019081 | chr3:28680448-28680492                            | NM_177586:238           | Eif5a2        | INSIDE                 | 0.992                                                        | 0.645                          | 1422.03            | 917.80             | 0.640                          | 1312.04            | 839.68             |
| A_68_P29237510 | chr13:95643777-95643821                           | NM_011021:-1783         | Otp           | PROMOTER               | 0.992                                                        | 1.508                          | 1105.73            | 1667.74            | 1.497                          | 944.99             | 1414.31            |
| A_68_P29437783 | chr14:19103060-19103104                           | NM_025586:418           | Rpl15         | INSIDE                 | 0.992                                                        | 0.499                          | 1339.28            | 668.87             | 0.495                          | 1211.93            | 600.36             |
| A_68_P21293424 | chr2:66472811-66472855                            | NM_018852:177           | Scn9a         | INSIDE                 | 0.992                                                        | 0.633                          | 1601.71            | 1014.38            | 0.628                          | 1282.15            | 805.12             |
| A_68_P25100396 | chr7:53895073-53895117                            | NM_013789:83            | Sergef        | INSIDE                 | 0.992                                                        | 1.898                          | 771.68             | 1464.98            | 1.882                          | 671.26             | 1263.58            |
| A_68_P31958012 | chr19:11893471-11893515                           | NM_011502:-109          | Stx3          | PROMOTER               | 0.992                                                        | 2.210                          | 922.69             | 2038.75            | 2.191                          | 894.54             | 1959.78            |
| A_68_P32021816 | chr19:24205473-24205517                           | NM_001198985:43136      | Tjp2          | INSIDE                 | 0.992                                                        | 3.244                          | 1594.51            | 5172.06            | 3.218                          | 1164.87            | 3748.69            |
| A_68_P28747158 | chr12:113205217-113205261                         | NM_027360:-50           | 2010107E04Rik | DIVERGENT_PROMOTER     | 0.991                                                        | 1.582                          | 1091.43            | 1727.06            | 1.569                          | 962.54             | 1510.08            |

| ProbeName      | Target position of probe on CpG island microarray | TargetID            | GeneSymbol    | CpG island Description | Ratio of relative methylation (TiO <sub>2</sub> -NP/Vehicle) | Sham group                     |                    |                    | TiO <sub>2</sub> -H group      |                    |                    |
|----------------|---------------------------------------------------|---------------------|---------------|------------------------|--------------------------------------------------------------|--------------------------------|--------------------|--------------------|--------------------------------|--------------------|--------------------|
|                |                                                   |                     |               |                        |                                                              | Relative methylation (Cy5/Cy3) | Cy3 signal (Input) | Cy5 signal (MeDIP) | Relative methylation (Cy5/Cy3) | Cy3 signal (Input) | Cy5 signal (MeDIP) |
| A_68_P30362447 | chr15:78629670-78629714                           | NM_130859:3780      | Card10        | INSIDE                 | 0.991                                                        | 2.938                          | 2744.23            | 8062.68            | 2.913                          | 2408.44            | 7015.37            |
| A_68_P27172914 | chr10:59648890-59648934                           | NM_016803:33096     | Chst3         | INSIDE                 | 0.991                                                        | 2.824                          | 436.94             | 1233.82            | 2.799                          | 379.51             | 1062.24            |
| A_68_P26841766 | chr9:113650462-113650506                          | NM_001114347-106    | Clasp2        | PROMOTER               | 0.991                                                        | 1.484                          | 956.75             | 1419.92            | 1.471                          | 794.79             | 1168.91            |
| A_68_P32145200 | chr19:46728723-46728767                           | NM_001177813:30854  | D19Wsu162e    | INSIDE                 | 0.991                                                        | 2.603                          | 856.94             | 2230.90            | 2.579                          | 754.84             | 1947.05            |
| A_68_P30590964 | chr16:21204925-21204969                           | NM_010143:79        | Ephb3         | INSIDE                 | 0.991                                                        | 0.692                          | 1919.35            | 1329.08            | 0.686                          | 1639.78            | 1125.32            |
| A_68_P24951532 | chr7:4959919-4959963                              | NM_001110330:4904   | Fiz1          | INSIDE                 | 0.991                                                        | 1.724                          | 2321.68            | 4002.67            | 1.708                          | 2045.57            | 3494.79            |
| A_68_P30083238 | chr15:25711367-25711411                           | NM_019472:159084    | Myo10         | INSIDE                 | 0.991                                                        | 1.799                          | 980.50             | 1763.81            | 1.783                          | 779.10             | 1389.16            |
| A_68_P25353646 | chr7:105227755-105227799                          | NM_008663:40227     | Myo7a         | INSIDE                 | 0.991                                                        | 1.580                          | 894.89             | 1413.47            | 1.565                          | 796.39             | 1246.73            |
| A_68_P23134314 | chr4:97438807-97438855                            | NM_001122953-5486   | Nfia          | PROMOTER               | 0.991                                                        | 1.589                          | 561.28             | 892.12             | 1.575                          | 521.62             | 821.32             |
| A_68_P21580770 | chr2:121240019-121240063                          | NM_007952:403       | Pdia3         | INSIDE                 | 0.991                                                        | 0.715                          | 1728.78            | 1235.54            | 0.709                          | 1475.76            | 1045.67            |
| A_68_P25090608 | chr7:52263818-52263862                            | NM_001008422:7779   | Scafl1        | INSIDE                 | 0.991                                                        | 1.607                          | 1196.28            | 1922.74            | 1.592                          | 956.34             | 1522.78            |
| A_68_P22342628 | chr3:94976704-94976748                            | NM_011351:8431      | Sema6c        | INSIDE                 | 0.991                                                        | 1.756                          | 720.73             | 1265.74            | 1.741                          | 642.58             | 1118.69            |
| A_68_P28755250 | chr12:114427183-114427227                         | NM_153776:3091      | Tmem121       | INSIDE                 | 0.991                                                        | 3.686                          | 1213.87            | 4474.68            | 3.655                          | 1068.91            | 3906.50            |
| A_68_P30566189 | chr16:15594510-15594554                           | NM_001159351:79     | Ube2v2        | INSIDE                 | 0.991                                                        | 1.415                          | 2170.14            | 3071.20            | 1.403                          | 1695.05            | 2378.10            |
| A_68_P24118487 | chr5:136386793-136386840                          | NM_018871:23695     | Ywhag         | INSIDE                 | 0.991                                                        | 2.762                          | 310.23             | 856.83             | 2.736                          | 245.32             | 671.20             |
| A_68_P32603679 | chrX:109714349-109714393                          | NM_177747:236       | Zfp711        | INSIDE                 | 0.991                                                        | 2.455                          | 464.94             | 1141.53            | 2.434                          | 289.87             | 705.61             |
| A_68_P26232729 | chr8:124860750-124860794                          | NM_009569:54732     | Zfpml         | INSIDE                 | 0.991                                                        | 1.687                          | 666.89             | 1125.17            | 1.672                          | 568.14             | 949.98             |
| A_68_P26276224 | chr9:4260268-4260312                              |                     |               | Unknown                | 0.991                                                        | 1.504                          | 1229.05            | 1848.69            | 1.490                          | 927.93             | 1382.64            |
| A_68_P21774735 | chr2:156846821-156846865                          | NM_001164663:58159  | 9830001H06Rik | INSIDE                 | 0.990                                                        | 1.965                          | 425.28             | 835.52             | 1.946                          | 418.09             | 813.42             |
| A_68_P27383819 | chr10:98376903-98376947                           | NM_026482-:861      | Atp2b1        | PROMOTER               | 0.990                                                        | 1.436                          | 1235.63            | 1774.96            | 1.422                          | 1076.44            | 1530.53            |
| A_68_P25586497 | chr7:148254408-148254452                          | NM_177897:7258      | B4galnt4      | INSIDE                 | 0.990                                                        | 2.607                          | 495.52             | 1291.70            | 2.580                          | 446.78             | 1152.81            |
| A_68_P28175482 | chr11:118906328-118906372                         | NM_013926-:4123     | Cbx8          | PROMOTER               | 0.990                                                        | 1.958                          | 739.25             | 1447.66            | 1.939                          | 674.22             | 1307.55            |
| A_68_P23418119 | chr4:151713113-151713157                          | NM_001081376:375    | Chd5          | INSIDE                 | 0.990                                                        | 2.392                          | 2509.82            | 6002.41            | 2.367                          | 2237.51            | 5297.09            |
| A_68_P20553863 | chr1:120734057-120734104                          | NM_001081125:216116 | Gliz          | INSIDE                 | 0.990                                                        | 2.316                          | 1210.84            | 2804.00            | 2.293                          | 959.38             | 2199.99            |
| A_68_P23977824 | chr5:110537149-110537193                          | NM_145147:46        | Gtppb6        | INSIDE                 | 0.990                                                        | 1.441                          | 3217.96            | 4637.99            | 1.427                          | 2416.16            | 3448.39            |
| A_68_P26346744 | chr9:21172242-21172286                            | NM_001042708-:182   | Ifi3          | PROMOTER               | 0.990                                                        | 0.575                          | 1430.63            | 822.38             | 0.569                          | 1082.06            | 615.89             |
| A_68_P21117014 | chr2:32568718-32568762                            | NR_037217-:332      | Mir2861       | DIVERGENT_PROMOTER     | 0.990                                                        | 1.400                          | 1642.46            | 2298.77            | 1.385                          | 1568.19            | 2172.01            |
| A_68_P24810881 | chr6:122824922-122824967                          | NM_026267:370       | Necap1        | INSIDE                 | 0.990                                                        | 0.631                          | 3086.28            | 1948.66            | 0.625                          | 2397.67            | 1499.10            |
| A_68_P30368806 | chr15:79659338-79659382                           | NM_001013360:5403   | Npcd          | INSIDE                 | 0.990                                                        | 2.081                          | 1115.25            | 2321.14            | 2.060                          | 916.46             | 1887.95            |
| A_68_P29697194 | chr14:70196895-70196939                           | NM_153514:8436      | Rhobtb2       | INSIDE                 | 0.990                                                        | 2.714                          | 2553.13            | 6929.77            | 2.687                          | 1854.22            | 4981.90            |
| A_68_P30602963 | chr16:23431338-23431382                           | NM_001004151:2155   | Rtp1          | INSIDE                 | 0.990                                                        | 2.822                          | 258.41             | 729.15             | 2.793                          | 243.89             | 681.29             |
| A_68_P27877796 | chr11:66340159-66340203                           | NM_001034874-:552   | Shisa6        | PROMOTER               | 0.990                                                        | 2.622                          | 1594.17            | 4180.25            | 2.597                          | 1209.43            | 3140.43            |
| A_68_P28100604 | chr11:106133705-106133749                         | NM_031878-:4780     | Smardc2       | PROMOTER               | 0.990                                                        | 1.482                          | 2228.00            | 3301.56            | 1.468                          | 1870.66            | 2745.54            |
| A_68_P26453530 | chr9:41932147-41932191                            | NM_011436:204       | Sorl1         | INSIDE                 | 0.990                                                        | 1.637                          | 761.75             | 1246.69            | 1.620                          | 667.80             | 1082.07            |
| A_68_P29493964 | chr14:29331522-29331566                           | NM_009524:12886     | Wnt5a         | INSIDE                 | 0.990                                                        | 1.819                          | 1162.20            | 2113.59            | 1.800                          | 998.13             | 1796.91            |
| A_68_P26020864 | A_68_P26020864                                    |                     |               | Unknown                | 0.990                                                        | 1.619                          | 578.31             | 936.50             | 1.604                          | 527.62             | 846.20             |
| A_68_P29309086 | chr13:108834463-108834507                         | NM_001048250-:183   | 2810008M24Rik | PROMOTER               | 0.989                                                        | 1.482                          | 2401.68            | 3558.36            | 1.465                          | 2094.99            | 3070.03            |
| A_68_P22415393 | chr3:108743147-108743191                          | NM_001078646-:306   | 492151S106Rik | PROMOTER               | 0.989                                                        | 3.883                          | 830.22             | 3223.45            | 3.839                          | 712.46             | 2735.20            |
| A_68_P30339173 | chr15:74551790-74551834                           | NM_198607:149       | 4930572J05Rik | INSIDE                 | 0.989                                                        | 1.603                          | 1174.18            | 1882.01            | 1.585                          | 999.82             | 1584.42            |
| A_68_P23891971 | chr5:92471843-92471887                            | NM_177270:168       | Cdk12         | INSIDE                 | 0.989                                                        | 1.827                          | 362.26             | 661.98             | 1.807                          | 349.71             | 631.87             |
| A_68_P24141815 | chr5:141000477-141000521                          | NM_021528:18936     | Chst12        | INSIDE                 | 0.989                                                        | 2.683                          | 816.95             | 2191.62            | 2.654                          | 781.86             | 2074.84            |
| A_68_P26572466 | chr9:62659190-62659234                            | NM_010193:243       | Fem1b         | INSIDE                 | 0.989                                                        | 2.004                          | 1302.10            | 2609.44            | 1.981                          | 1173.92            | 2325.73            |
| A_68_P28080241 | chr11:102417779-102417823                         | NM_001159492-:328   | Gpach8        | PROMOTER               | 0.989                                                        | 1.658                          | 840.79             | 1394.44            | 1.640                          | 747.80             | 1226.57            |
| A_68_P31114358 | chr17:27252888-27252932                           | NM_080553:58662     | Itpr3         | INSIDE                 | 0.989                                                        | 2.351                          | 1104.54            | 2596.50            | 2.326                          | 798.30             | 1856.78            |
| A_68_P26587427 | chr9:65239407-65239451                            | NM_028974:31        | Kbtbd13       | INSIDE                 | 0.989                                                        | 1.909                          | 3214.16            | 6135.23            | 1.888                          | 2567.53            | 4848.61            |
| A_68_P21475551 | chr2:102026439-102026483                          | NM_178886:74        | Ldlrad3       | INSIDE                 | 0.989                                                        | 2.798                          | 3455.55            | 9667.91            | 2.767                          | 3205.43            | 8867.99            |
| A_68_P26507495 | chr9:50911542-50911586                            | NR_029654-:349      | Mir34c        | PROMOTER               | 0.989                                                        | 1.836                          | 752.30             | 1381.07            | 1.816                          | 742.77             | 1349.08            |
| A_68_P21840231 | chr2:168057062-168057106                          | NM_001160330:963    | Mocs3         | INSIDE                 | 0.989                                                        | 3.064                          | 873.74             | 2677.58            | 3.030                          | 775.97             | 2351.26            |
| A_68_P31779044 | chr18:65243606-65243650                           | NM_031881:60448     | Nedd41        | INSIDE                 | 0.989                                                        | 2.579                          | 570.33             | 1470.94            | 2.551                          | 530.92             | 1354.30            |
| A_68_P28185956 | chr11:120522369-120522413                         | NM_175263-:239      | Notum         | PROMOTER               | 0.989                                                        | 0.606                          | 1165.65            | 705.92             | 0.599                          | 984.16             | 589.61             |
| A_68_P20768472 | chr1:162722548-162722592                          | NM_013862:499       | Rabgap11      | INSIDE                 | 0.989                                                        | 0.603                          | 1760.02            | 1061.95            | 0.597                          | 1518.06            | 905.93             |

| ProbeName      | Target position of probe on CpG island microarray | TargetID                | GeneSymbol | CpG island Description | Ratio of relative methylation (TiO <sub>2</sub> -NP/Vehicle) | Sham group                     |                    |                    | TiO <sub>2</sub> -H group      |                    |                    |
|----------------|---------------------------------------------------|-------------------------|------------|------------------------|--------------------------------------------------------------|--------------------------------|--------------------|--------------------|--------------------------------|--------------------|--------------------|
|                |                                                   |                         |            |                        |                                                              | Relative methylation (Cy5/Cy3) | Cy3 signal (Input) | Cy5 signal (MeDIP) | Relative methylation (Cy5/Cy3) | Cy3 signal (Input) | Cy5 signal (MeDIP) |
| A_68_P23701541 | chr5:53980854-53980898                            | NM_009035:-577          | Rbpj       | PROMOTER               | 0.989                                                        | 2.061                          | 830.34             | 1711.25            | 2.039                          | 901.43             | 1837.68            |
| A_68_P27807187 | chr11:53705109-53705153                           | NM_011396:75            | Slc22a5    | INSIDE                 | 0.989                                                        | 0.658                          | 1648.46            | 1085.07            | 0.651                          | 1324.12            | 862.34             |
| A_68_P31201708 | chr17:45682853-45682897                           | NM_001013749:3752       | Tmem151b   | INSIDE                 | 0.989                                                        | 1.734                          | 1153.69            | 2000.09            | 1.714                          | 1012.03            | 1734.82            |
| A_68_P31213639 | chr17:47826066-47826110                           | NM_001164729:-753       | Tom6       | DIVERGENT_PROMOTER     | 0.989                                                        | 1.579                          | 5728.67            | 9043.05            | 1.561                          | 3958.98            | 6180.54            |
| A_68_P24428426 | chr6:48579284-48579328                            | NR_027236:1141          | Al854703   | INSIDE                 | 0.988                                                        | 1.547                          | 1267.20            | 1960.61            | 1.529                          | 1086.86            | 1662.15            |
| A_68_P32319552 | chrX:34185014-34185058                            | NM_001081956:373        | Akap17b    | INSIDE                 | 0.988                                                        | 2.118                          | 578.43             | 1225.19            | 2.093                          | 337.18             | 705.86             |
| A_68_P25471454 | chr7:128125669-128125713                          | NM_007672:136           | Cdr2       | INSIDE                 | 0.988                                                        | 1.885                          | 713.74             | 1345.06            | 1.861                          | 641.60             | 1194.29            |
| A_68_P25956954 | chr8:73993612-73993656                            | NM_025600:542           | Dda1       | INSIDE                 | 0.988                                                        | 2.090                          | 419.93             | 877.79             | 2.065                          | 348.89             | 720.56             |
| A_68_P29241526 | chr13:96374600-96374644                           | NM_010169:13766         | F2r        | INSIDE                 | 0.988                                                        | 2.375                          | 420.52             | 998.80             | 2.346                          | 341.74             | 801.61             |
| A_68_P21874509 | chr2:174124950-174124994                          | NM_201617:1613          | Gnas       | INSIDE                 | 0.988                                                        | 1.802                          | 1248.85            | 2250.76            | 1.780                          | 1032.70            | 1838.30            |
| A_68_P31116850 | chr17:27649440-27649484                           | NM_001013385:-9213      | Grm4       | PROMOTER               | 0.988                                                        | 0.464                          | 1307.14            | 606.05             | 0.458                          | 1107.42            | 507.50             |
| A_68_P23415960 | chr4:151383595-151383639                          | NM_001033352:617        | Klhl21     | INSIDE                 | 0.988                                                        | 2.642                          | 365.93             | 966.95             | 2.610                          | 381.00             | 994.36             |
| A_68_P22629215 | chr3:148482907-148482960                          | NM_001081298:134666     | Lphn2      | INSIDE                 | 0.988                                                        | 2.062                          | 396.38             | 817.25             | 2.036                          | 345.95             | 704.50             |
| A_68_P30350167 | chr15:76546156-76546200                           | NM_198119:6425          | Lrcc24     | INSIDE                 | 0.988                                                        | 0.557                          | 993.26             | 553.73             | 0.551                          | 692.99             | 381.75             |
| A_68_P22312500 | chr3:88018418-88018462                            | NR_037276:-652          | Mir3093    | PROMOTER               | 0.988                                                        | 0.606                          | 1184.88            | 718.54             | 0.599                          | 1037.70            | 621.45             |
| A_68_P24466502 | chr6:54922369-54922413                            | NM_001171007:-735       | Nod1       | PROMOTER               | 0.988                                                        | 0.532                          | 1305.33            | 694.96             | 0.526                          | 1238.16            | 651.16             |
| A_68_P31375069 | chr17:79419723-79419767                           | NM_001171004:412        | Prkd3      | INSIDE                 | 0.988                                                        | 2.266                          | 1129.26            | 2559.25            | 2.238                          | 1105.71            | 2474.92            |
| A_68_P26629967 | chr9:72704625-72704669                            | NM_175485:49566         | Prtg       | INSIDE                 | 0.988                                                        | 2.087                          | 1229.92            | 2566.27            | 2.062                          | 1035.26            | 2134.25            |
| A_68_P26892620 | chr9:122930391-122930435                          | NM_001164823:-31        | Tmem42     | PROMOTER               | 0.988                                                        | 1.660                          | 1637.69            | 2718.51            | 1.640                          | 1357.42            | 2226.35            |
| A_68_P24972906 | chr7:13366070-13366114                            | NM_001017955:-5085      | Zscan18    | PROMOTER               | 0.988                                                        | 1.737                          | 885.58             | 1537.96            | 1.715                          | 816.81             | 1400.82            |
| A_68_P31219173 | chr17:48925797-48925845                           |                         |            | Unknown                | 0.988                                                        | 2.862                          | 1780.84            | 5096.60            | 2.828                          | 1310.40            | 3705.23            |
| A_68_P20121784 | chr1:30930609-30930653                            | ENSMUST00000046443:-91  |            | PROMOTER               | 0.988                                                        | 2.362                          | 671.98             | 1587.49            | 2.335                          | 631.87             | 1475.50            |
| A_68_P20162424 | chr1:38893271-38893315                            | ENSMUST00000147695:-357 |            | PROMOTER               | 0.988                                                        | 1.663                          | 900.96             | 1498.38            | 1.644                          | 918.20             | 1509.18            |
| A_68_P25545210 | chr7:141416870-141416914                          | NM_007400:-112          | Adam12     | PROMOTER               | 0.987                                                        | 0.527                          | 3050.15            | 1608.49            | 0.520                          | 2311.17            | 1202.90            |
| A_68_P27100727 | chr10:43230406-43230450                           | NM_199028:31483         | Bend3      | INSIDE                 | 0.987                                                        | 1.976                          | 388.54             | 767.63             | 1.949                          | 336.31             | 655.53             |
| A_68_P23904971 | chr5:96590602-96590646                            | NM_178854:150           | Cnot6l     | INSIDE                 | 0.987                                                        | 2.438                          | 17179.15           | 41888.87           | 2.407                          | 12504.52           | 30097.85           |
| A_68_P27594243 | chr11:11925830-11925874                           | NM_001177629:2122       | Grb10      | INSIDE                 | 0.987                                                        | 1.542                          | 1367.93            | 2109.57            | 1.522                          | 1134.56            | 1726.73            |
| A_68_P27340039 | chr10:90564881-90564925                           | NM_027078:19119         | Ikbip      | INSIDE                 | 0.987                                                        | 4.260                          | 1141.69            | 4863.62            | 4.203                          | 888.96             | 3736.56            |
| A_68_P27235135 | chr10:70844350-70844394                           | NM_027184:33832         | Ipmk       | INSIDE                 | 0.987                                                        | 1.742                          | 677.75             | 1180.30            | 1.719                          | 606.33             | 1041.97            |
| A_68_P22314304 | chr3:88335424-88335468                            | NM_001029890:-870       | Mex3a      | PROMOTER               | 0.987                                                        | 1.540                          | 2407.80            | 3708.04            | 1.520                          | 1959.91            | 2979.61            |
| A_68_P27282834 | chr10:79844741-79844785                           | NM_198615:5634          | Mex3d      | INSIDE                 | 0.987                                                        | 2.711                          | 1230.65            | 3336.19            | 2.676                          | 1166.58            | 3122.22            |
| A_68_P26381826 | chr9:28210925-28210969                            | NM_177906:612093        | Opcml      | INSIDE                 | 0.987                                                        | 1.813                          | 1215.38            | 2203.13            | 1.790                          | 1027.37            | 1838.58            |
| A_68_P30012298 | chr15:10644202-10644246                           | NM_030690:-929          | Rai14      | PROMOTER               | 0.987                                                        | 0.565                          | 1508.75            | 851.97             | 0.557                          | 1348.68            | 751.79             |
| A_68_P31256954 | chr17:56705768-56705812                           | NM_001029979:18216      | Safb2      | INSIDE                 | 0.987                                                        | 2.550                          | 2205.86            | 5625.21            | 2.517                          | 1821.96            | 4585.77            |
| A_68_P27325551 | chr10:87922155-87922200                           | NM_011517:-154          | Syp3       | PROMOTER               | 0.987                                                        | 2.836                          | 1525.67            | 4326.28            | 2.798                          | 1185.52            | 3317.35            |
| A_68_P29039174 | chr13:52733712-52733756                           | NM_011518:41484         | Sykb       | INSIDE                 | 0.987                                                        | 1.718                          | 1739.03            | 2988.28            | 1.696                          | 1396.85            | 2369.41            |
| A_68_P30140502 | chr15:36723196-36723240                           | NM_011740:1075          | Ywhaz      | INSIDE                 | 0.987                                                        | 0.545                          | 1024.90            | 558.38             | 0.538                          | 905.44             | 486.70             |
| A_68_P25637837 | chr8:8690176-8690220                              | NM_176849:339           | Arglu1     | INSIDE                 | 0.986                                                        | 2.475                          | 501.48             | 1241.14            | 2.440                          | 479.12             | 1169.03            |
| A_68_P25961590 | chr8:74998787-74998831                            | NM_138585:324           | Cherp      | INSIDE                 | 0.986                                                        | 0.477                          | 1545.33            | 737.31             | 0.470                          | 1282.48            | 603.28             |
| A_68_P24122082 | chr5:137041507-137041551                          | NM_198602:1747          | Cux1       | INSIDE                 | 0.986                                                        | 0.558                          | 1320.70            | 736.48             | 0.550                          | 1047.86            | 576.37             |
| A_68_P31537508 | chr18:20217493-20217537                           | NM_013505:492           | Dsc2       | INSIDE                 | 0.986                                                        | 1.542                          | 3097.57            | 4775.46            | 1.520                          | 2366.96            | 3597.67            |
| A_68_P32152396 | chr19:47939880-47939924                           | NM_030051:-132          | Gsto2      | PROMOTER               | 0.986                                                        | 0.455                          | 1277.20            | 580.60             | 0.448                          | 948.67             | 425.33             |
| A_68_P25004860 | chr7:25217492-25217536                            | NM_199013:13187         | Irgc1      | INSIDE                 | 0.986                                                        | 3.089                          | 315.26             | 973.74             | 3.046                          | 319.86             | 974.28             |
| A_68_P25096864 | chr7:53356069-53356113                            | NM_010602:-483          | Kcnj11     | PROMOTER               | 0.986                                                        | 1.440                          | 1508.67            | 2171.80            | 1.419                          | 1155.14            | 1639.24            |
| A_68_P31847802 | chr18:77680387-77680431                           | NM_172834:159712        | Loxhd1     | INSIDE                 | 0.986                                                        | 3.351                          | 903.31             | 3027.01            | 3.304                          | 787.80             | 2602.59            |
| A_68_P25370886 | chr7:108147189-108147233                          | NM_008773:13295         | P2ry2      | INSIDE                 | 0.986                                                        | 3.180                          | 1765.03            | 5612.30            | 3.136                          | 1453.99            | 4560.23            |
| A_68_P28323159 | chr12:30687550-30687594                           | NM_181395:64672         | Pxdn       | INSIDE                 | 0.986                                                        | 2.115                          | 1291.19            | 2730.50            | 2.085                          | 957.93             | 1997.51            |
| A_68_P32135694 | chr19:45063945-45063989                           | NM_011976:133           | Sema4g     | INSIDE                 | 0.986                                                        | 2.952                          | 1421.68            | 4196.36            | 2.909                          | 1054.56            | 3067.81            |
| A_68_P21133066 | chr2:35192576-35192620                            | NM_013515:-69           | Stom       | PROMOTER               | 0.986                                                        | 3.443                          | 1961.74            | 6753.71            | 3.393                          | 1605.99            | 5449.21            |
| A_68_P26785091 | chr9:103207385-103207429                          | NM_176979:-250          | Topbp1     | PROMOTER               | 0.986                                                        | 1.447                          | 1636.94            | 2369.01            | 1.428                          | 1412.41            | 2016.41            |
| A_68_P20350605 | chr1:74847285-74847329                            | NM_009518:8714          | Wnt10a     | INSIDE                 | 0.986                                                        | 1.688                          | 608.84             | 1027.91            | 1.665                          | 595.63             | 991.60             |

| ProbeName      | Target position of probe on CpG island microarray | TargetID                 | GeneSymbol    | CpG island Description | Ratio of relative methylation (TiO <sub>2</sub> -NP/Vehicle) | Sham group                     |                    |                    | TiO <sub>2</sub> -H group      |                    |                    |
|----------------|---------------------------------------------------|--------------------------|---------------|------------------------|--------------------------------------------------------------|--------------------------------|--------------------|--------------------|--------------------------------|--------------------|--------------------|
|                |                                                   |                          |               |                        |                                                              | Relative methylation (Cy5/Cy3) | Cy3 signal (Input) | Cy5 signal (MeDIP) | Relative methylation (Cy5/Cy3) | Cy3 signal (Input) | Cy5 signal (MeDIP) |
| A_68_P27541020 | chr10:127814573-127814617                         | NM_172790:415            | Ankrd52       | INSIDE                 | 0.985                                                        | 0.631                          | 1965.33            | 1239.93            | 0.622                          | 1591.53            | 989.50             |
| A_68_P24114167 | chr5:135462404-135462448                          | NM_009902:343            | Cldn3         | INSIDE                 | 0.985                                                        | 2.183                          | 1046.48            | 2284.14            | 2.150                          | 760.25             | 1634.22            |
| A_68_P26224695 | chr8:123651891-123651935                          | NM_008024:328            | Foxl1         | INSIDE                 | 0.985                                                        | 1.820                          | 560.55             | 1019.98            | 1.792                          | 564.55             | 1011.86            |
| A_68_P21901458 | chr2:179839037-179839081                          | NM_133849:-131           | Hrh3          | PROMOTER               | 0.985                                                        | 0.618                          | 7051.52            | 4360.75            | 0.609                          | 5215.24            | 3177.94            |
| A_68_P21309975 | chr2:69423669-69423713                            | NM_001081088:434         | Lrp2          | INSIDE                 | 0.985                                                        | 0.495                          | 1031.62            | 510.89             | 0.488                          | 895.81             | 437.07             |
| A_68_P28523609 | chr12:72076112-72076156                           | NM_011184:525            | Psm3          | INSIDE                 | 0.985                                                        | 2.430                          | 1255.42            | 3050.49            | 2.394                          | 1012.48            | 2424.02            |
| A_68_P25035179 | chr7:31911519-31911563                            | NM_011322:424            | Scn1b         | INSIDE                 | 0.985                                                        | 0.534                          | 2896.12            | 1547.08            | 0.526                          | 2303.42            | 1212.61            |
| A_68_P30465080 | chr15:96530202-96530246                           | NM_175121:-95            | Slc38a2       | PROMOTER               | 0.985                                                        | 1.470                          | 1227.30            | 1804.41            | 1.449                          | 1141.11            | 1653.36            |
| A_68_P31096054 | chr17:24343797-24343841                           | NM_001163847:-1311       | Tbc1d24       | PROMOTER               | 0.985                                                        | 1.682                          | 848.25             | 1426.70            | 1.657                          | 666.97             | 1104.98            |
| A_68_P26398235 | chr9:30838331-30838375                            | NM_001115130:124         | Zbtb44        | INSIDE                 | 0.985                                                        | 2.720                          | 648.26             | 1763.40            | 2.680                          | 666.22             | 1785.42            |
| A_68_P32783800 | chrX:157736299-157736343                          | ENSMUST00000141946:10933 |               | INSIDE                 | 0.985                                                        | 1.914                          | 995.11             | 1904.90            | 1.885                          | 437.04             | 823.86             |
| A_68_P27212535 | chr10:67011075-67011119                           | NM_001005419:607         | Ado           | INSIDE                 | 0.984                                                        | 1.617                          | 666.68             | 1077.75            | 1.591                          | 637.98             | 1014.87            |
| A_68_P30371309 | chr15:80118848-80118907                           | NM_001044308:1210        | Caena1i       | INSIDE                 | 0.984                                                        | 5.900                          | 779.90             | 4601.09            | 5.802                          | 448.47             | 2602.24            |
| A_68_P26129047 | chr8:107064724-107064768                          | NM_053070:40             | Car7          | INSIDE                 | 0.984                                                        | 1.474                          | 916.78             | 1351.33            | 1.450                          | 845.35             | 1225.81            |
| A_68_P20350878 | chr1:74901948-74901992                            | NM_009872:368            | Cdk5r2        | INSIDE                 | 0.984                                                        | 0.588                          | 1237.48            | 727.57             | 0.578                          | 1135.59            | 656.87             |
| A_68_P21177697 | chr2:44412424-44412468                            | NM_172662:304696         | Gtdc1         | DOWNSTREAM             | 0.984                                                        | 1.679                          | 1570.50            | 2637.29            | 1.652                          | 1391.55            | 2299.44            |
| A_68_P23912410 | chr5:97820982-97821026                            | NM_001033191:345         | Naa11         | INSIDE                 | 0.984                                                        | 2.256                          | 490.34             | 1106.15            | 2.221                          | 444.91             | 988.06             |
| A_68_P21350021 | chr2:76245111-76245155                            | NM_145525:538            | Osbpl6        | INSIDE                 | 0.984                                                        | 1.465                          | 1364.17            | 1998.50            | 1.442                          | 1121.09            | 1616.89            |
| A_68_P27924665 | chr11:74992221-74992265                           | NM_027136:68             | Ovea2         | INSIDE                 | 0.984                                                        | 1.688                          | 562.63             | 949.91             | 1.661                          | 630.56             | 1047.52            |
| A_68_P24117610 | chr5:136209906-136209950                          | NM_008898:44845          | Por           | INSIDE                 | 0.984                                                        | 2.490                          | 1005.36            | 2503.21            | 2.450                          | 783.90             | 1920.31            |
| A_68_P24770500 | chr6:115312177-115312222                          | NM_001127330:961         | Pparg         | INSIDE                 | 0.984                                                        | 2.309                          | 1915.39            | 4422.92            | 2.273                          | 1607.28            | 3653.70            |
| A_68_P27675740 | chr11:29593694-29593738                           | NM_194051:-57            | Rtn4          | PROMOTER               | 0.984                                                        | 1.512                          | 1435.95            | 2171.48            | 1.488                          | 1135.39            | 1689.32            |
| A_68_P31253476 | chr17:56176213-56176257                           | NM_013664:-235           | Sh3gl1        | DIVERGENT_PROMOTER     | 0.984                                                        | 0.587                          | 1319.85            | 774.32             | 0.577                          | 1060.50            | 612.42             |
| A_68_P20156313 | chr1:37921860-37921904                            | NM_207228:42             | Tsga10        | INSIDE                 | 0.984                                                        | 1.487                          | 1303.87            | 1938.34            | 1.463                          | 1176.17            | 1720.15            |
| A_68_P25735811 | chr8:28089322-28089366                            | NM_001101502:1537        | Zfp703        | INSIDE                 | 0.984                                                        | 2.211                          | 722.22             | 1596.76            | 2.177                          | 719.20             | 1565.39            |
| A_68_P29477491 | chr14:26279234-26279278                           | NM_183208:586            | Zmiz1         | INSIDE                 | 0.984                                                        | 0.604                          | 984.40             | 594.36             | 0.594                          | 968.91             | 575.69             |
| A_68_P20644617 | chr1:138112450-138112494                          | NM_028872:18369          | 5730559C18Rik | INSIDE                 | 0.983                                                        | 2.441                          | 1365.18            | 3332.74            | 2.399                          | 1098.98            | 2636.37            |
| A_68_P25024595 | chr7:29747291-29747335                            | NM_021895:-13            | Actn4         | PROMOTER               | 0.983                                                        | 2.055                          | 665.06             | 1366.71            | 2.021                          | 658.59             | 1330.70            |
| A_68_P21007915 | chr2:11700413-11700457                            | NM_177268:1055           | Ankrd16       | INSIDE                 | 0.983                                                        | 0.592                          | 2052.73            | 1215.02            | 0.582                          | 1741.63            | 1013.63            |
| A_68_P26126978 | chr8:106666653-106666697                          | NM_009868:41150          | Cdh5          | INSIDE                 | 0.983                                                        | 3.899                          | 1326.26            | 5170.47            | 3.831                          | 1011.90            | 3876.40            |
| A_68_P21768603 | chr2:155782523-155782567                          | NM_001129999:251         | Cep250        | INSIDE                 | 0.983                                                        | 1.502                          | 1093.14            | 1641.73            | 1.476                          | 1008.19            | 1487.72            |
| A_68_P23815279 | chr5:76733734-76733778                            | NM_007715:-183           | Clock         | PROMOTER               | 0.983                                                        | 2.763                          | 1443.94            | 3990.20            | 2.717                          | 1235.94            | 3358.32            |
| A_68_P33007788 | chr4_random:128082-128126                         | NM_001033326:18303       | Dhrsx         | INSIDE                 | 0.983                                                        | 3.352                          | 7826.58            | 26236.45           | 3.294                          | 5918.35            | 19497.41           |
| A_68_P25547702 | chr7:141862476-141862520                          | NM_001033420:129         | Dock1         | INSIDE                 | 0.983                                                        | 2.493                          | 457.48             | 1140.66            | 2.451                          | 472.49             | 1158.29            |
| A_68_P32127591 | chr19:43689143-43689187                           | NM_008699:2350           | Nkx2-3        | INSIDE                 | 0.983                                                        | 1.958                          | 1635.82            | 3203.36            | 1.925                          | 1398.23            | 2691.74            |
| A_68_P24161581 | chr5:145306987-145307031                          | NM_016789:253            | Nptx2         | INSIDE                 | 0.983                                                        | 2.154                          | 644.33             | 1388.03            | 2.118                          | 590.96             | 1251.53            |
| A_68_P31256442 | chr17:56615968-56616012                           | NM_011218:-87            | Ptprs         | PROMOTER               | 0.983                                                        | 1.977                          | 580.47             | 1147.41            | 1.944                          | 511.02             | 993.22             |
| A_68_P21098345 | chr2:29475651-29475695                            | NM_001039086:433         | Rapgef1       | INSIDE                 | 0.983                                                        | 1.737                          | 1341.38            | 2329.43            | 1.706                          | 1157.13            | 1974.37            |
| A_68_P23364322 | chr4:141034341-141034385                          | NM_019763:60150          | Spn           | INSIDE                 | 0.983                                                        | 1.865                          | 847.60             | 1580.36            | 1.834                          | 654.27             | 1199.61            |
| A_68_P23330842 | chr4:135412186-135412230                          | NM_001080387:202         | Srsf10        | INSIDE                 | 0.983                                                        | 0.521                          | 1242.43            | 647.70             | 0.512                          | 1088.35            | 557.75             |
| A_68_P20016448 | chr1:7388275-7388319                              | ENSMUST00000138711:-414  |               | PROMOTER               | 0.983                                                        | 1.639                          | 587.94             | 963.72             | 1.611                          | 509.66             | 820.91             |
| A_68_P26291033 | chr9:8134257-8134301                              | NM_001045524:16          | AK129341      | INSIDE                 | 0.982                                                        | 1.967                          | 652.48             | 1283.63            | 1.932                          | 584.75             | 1129.52            |
| A_68_P32316569 | chrX:33565828-33565872                            | NM_001009947:137024      | Dock11        | INSIDE                 | 0.982                                                        | 2.289                          | 707.75             | 1620.24            | 2.248                          | 378.57             | 851.21             |
| A_68_P20352250 | chr1:75139665-75139709                            | NM_170755:327            | Fam134a       | INSIDE                 | 0.982                                                        | 1.521                          | 1512.86            | 2300.82            | 1.493                          | 1259.14            | 1879.97            |
| A_68_P30514665 | chr16:5255833-5255877                             | NM_027446:195            | Fam86         | INSIDE                 | 0.982                                                        | 1.983                          | 1225.66            | 2430.13            | 1.946                          | 1036.48            | 2017.19            |
| A_68_P25371479 | chr7:108257513-108257557                          | NM_001146010:246         | Fchs2         | INSIDE                 | 0.982                                                        | 1.998                          | 6387.90            | 12762.35           | 1.961                          | 4591.22            | 9004.18            |
| A_68_P27543732 | chr10:128328704-128328748                         | NM_010272:48             | Gdf11         | INSIDE                 | 0.982                                                        | 2.630                          | 937.32             | 2465.40            | 2.584                          | 847.16             | 2189.11            |
| A_68_P22843572 | chr4:36897429-36897473                            | NM_001165999:1327        | Lingo2        | INSIDE                 | 0.982                                                        | 0.645                          | 1435.10            | 925.78             | 0.634                          | 1199.28            | 759.94             |
| A_68_P31930680 | chr19:5757972-5758016                             | NM_008520:17091          | Ltbp3         | INSIDE                 | 0.982                                                        | 1.847                          | 483.48             | 893.10             | 1.813                          | 444.87             | 806.68             |
| A_68_P28946344 | chr13:36083419-36083472                           | NM_201358:125781         | Lymr4         | INSIDE                 | 0.982                                                        | 5.879                          | 1093.48            | 6428.24            | 5.775                          | 840.65             | 4854.98            |
| A_68_P27971539 | chr11:83258360-83258404                           | NM_080453:18081          | Mmp28         | INSIDE                 | 0.982                                                        | 1.664                          | 670.72             | 1115.84            | 1.633                          | 551.82             | 901.11             |

| ProbeName      | Target position of probe on CpG island microarray | TargetID            | GeneSymbol    | CpG island Description | Ratio of relative methylation (TiO <sub>2</sub> -NP/Vehicle) | Sham group                     |                    |                    | TiO <sub>2</sub> -H group      |                    |                    |
|----------------|---------------------------------------------------|---------------------|---------------|------------------------|--------------------------------------------------------------|--------------------------------|--------------------|--------------------|--------------------------------|--------------------|--------------------|
|                |                                                   |                     |               |                        |                                                              | Relative methylation (Cy5/Cy3) | Cy3 signal (Input) | Cy5 signal (MeDIP) | Relative methylation (Cy5/Cy3) | Cy3 signal (Input) | Cy5 signal (MeDIP) |
| A_68_P24161578 | chr5:145306716-145306760                          | NM_016789:-17       | Nptx2         | PROMOTER               | 0.982                                                        | 2.101                          | 570.06             | 1197.44            | 2.062                          | 580.45             | 1196.88            |
| A_68_P31442547 | chr17:91487821-91487865                           | NM_020252:4300      | Nrxn1         | INSIDE                 | 0.982                                                        | 3.202                          | 406.13             | 1300.31            | 3.143                          | 359.60             | 1130.32            |
| A_68_P28103446 | chr11:106640661-106640705                         | NR_027785:147       | Polg2         | INSIDE                 | 0.982                                                        | 1.592                          | 592.32             | 942.93             | 1.564                          | 572.64             | 895.33             |
| A_68_P29073065 | chr13:58504155-58504199                           | NM_001168248:219    | Rmi1          | INSIDE                 | 0.982                                                        | 0.545                          | 1789.99            | 976.38             | 0.535                          | 1472.97            | 788.63             |
| A_68_P26873497 | chr9:119518976-119519024                          | NM_001205321:109150 | Scn10a        | INSIDE                 | 0.982                                                        | 2.249                          | 395.25             | 888.94             | 2.208                          | 352.59             | 778.39             |
| A_68_P26365991 | chr9:25059906-25059950                            | NM_001205367:-111   | Septin7       | PROMOTER               | 0.982                                                        | 0.432                          | 1574.16            | 680.02             | 0.424                          | 1299.28            | 551.07             |
| A_68_P21116240 | chr2:32442707-32442751                            | NM_011373:-281      | St6galnac4    | PROMOTER               | 0.982                                                        | 1.714                          | 3043.54            | 5215.76            | 1.683                          | 2300.64            | 3871.68            |
| A_68_P23309116 | chr4:131477634-131477678                          | NM_001201367:-29    | Tmem200b      | PROMOTER               | 0.982                                                        | 3.207                          | 560.76             | 1798.08            | 3.147                          | 490.19             | 1542.84            |
| A_68_P25452560 | chr7:124524755-124524799                          | NM_175645:284       | Xylt1         | INSIDE                 | 0.982                                                        | 5.654                          | 1157.92            | 6546.38            | 5.552                          | 859.09             | 4769.48            |
| A_68_P31932464 | chr19:6061914-6061958                             | NM_013859:730       | Znhit2-ps     | INSIDE                 | 0.982                                                        | 0.578                          | 1225.76            | 708.18             | 0.567                          | 1047.98            | 594.59             |
| A_68_P27282330 | chr10:79767570-79767614                           | NM_011789:3028      | Apc2          | INSIDE                 | 0.981                                                        | 2.687                          | 2411.80            | 6480.44            | 2.637                          | 2069.36            | 5456.03            |
| A_68_P27298383 | chr10:83111269-83111313                           | NM_145220:119       | Appl2         | INSIDE                 | 0.981                                                        | 1.653                          | 611.68             | 1011.10            | 1.621                          | 543.45             | 881.12             |
| A_68_P20456918 | chr1:95582954-95582998                            | NM_016778:706       | Bok           | INSIDE                 | 0.981                                                        | 1.672                          | 797.07             | 1332.57            | 1.639                          | 709.43             | 1163.04            |
| A_68_P23498122 | chr5:15441040-15441084                            | NM_001110843:554    | Caena2d1      | INSIDE                 | 0.981                                                        | 3.337                          | 461.34             | 1539.61            | 3.275                          | 428.80             | 1404.37            |
| A_68_P27543294 | chr10:128242682-128242726                         | NM_028873:-27       | Dnajc14       | DIVERGENT_PROMOTER     | 0.981                                                        | 2.385                          | 701.76             | 1673.61            | 2.340                          | 607.95             | 1422.84            |
| A_68_P20351022 | chr1:74929216-74929260                            | NM_153111:2744      | Fev           | INSIDE                 | 0.981                                                        | 2.452                          | 1021.02            | 2503.69            | 2.406                          | 878.87             | 2114.20            |
| A_68_P26319136 | chr9:14555274-14555318                            | NM_010242:1270      | Fut4          | INSIDE                 | 0.981                                                        | 1.700                          | 938.39             | 1594.98            | 1.668                          | 793.74             | 1323.68            |
| A_68_P25842942 | chr8:48759661-48759705                            | NM_023503:831       | Ing2          | INSIDE                 | 0.981                                                        | 1.818                          | 1503.05            | 2733.00            | 1.784                          | 1379.85            | 2461.33            |
| A_68_P27843264 | chr11:60290404-60290448                           | NM_001103171:7586   | Myo15         | INSIDE                 | 0.981                                                        | 2.251                          | 944.66             | 2126.86            | 2.208                          | 790.14             | 1744.35            |
| A_68_P29700850 | chr4:70751126-70751170                            | NM_001135152:-2908  | Slc39a14      | PROMOTER               | 0.981                                                        | 1.396                          | 3974.76            | 5547.45            | 1.369                          | 3527.42            | 4830.41            |
| A_68_P21831890 | chr2:166612210-166612254                          | NM_023815:-7034     | Trp53rk       | PROMOTER               | 0.981                                                        | 1.675                          | 591.75             | 991.20             | 1.643                          | 505.29             | 830.18             |
| A_68_P22349909 | chr3:96361476-96361535                            | NM_001009935:-374   | Txnip         | PROMOTER               | 0.981                                                        | 2.409                          | 240.78             | 579.98             | 2.362                          | 193.65             | 457.45             |
| A_68_P25499303 | chr7:133343931-133343975                          | NM_028816:-30       | Xpo6          | PROMOTER               | 0.981                                                        | 2.118                          | 1438.07            | 3045.89            | 2.078                          | 1286.10            | 2672.31            |
| A_68_P28608874 | chr12:87585109-87585153                           | NM_027405:2303      | 1700020O03Rik | INSIDE                 | 0.980                                                        | 2.404                          | 1351.32            | 3248.52            | 2.355                          | 1093.47            | 2575.42            |
| A_68_P31849429 | chr18:77952019-77952063                           | NM_178670:709       | 8030462N17Rik | INSIDE                 | 0.980                                                        | 1.975                          | 1675.16            | 3307.91            | 1.935                          | 1583.02            | 3062.53            |
| A_68_P24469555 | chr6:55402357-55402401                            | NM_001025372:405    | Adecyap1r1    | INSIDE                 | 0.980                                                        | 0.596                          | 1623.90            | 968.08             | 0.584                          | 1361.30            | 795.29             |
| A_68_P32385501 | chrX:50410354-50410398                            | NR_038184:-9        | C430049B03Rik | PROMOTER               | 0.980                                                        | 2.333                          | 2763.72            | 6446.59            | 2.286                          | 1385.34            | 3166.64            |
| A_68_P22822458 | chr4:32702338-32702382                            | NM_001122978:-87    | Casp8ap2      | PROMOTER               | 0.980                                                        | 1.454                          | 1112.22            | 1617.57            | 1.425                          | 940.84             | 1340.41            |
| A_68_P24122109 | chr5:137044884-137044928                          | NM_009986:-1605     | Cux1          | PROMOTER               | 0.980                                                        | 1.796                          | 1029.52            | 1848.75            | 1.760                          | 1002.70            | 1765.00            |
| A_68_P23325563 | chr4:134480163-134480207                          | NM_023665:645       | D4Wsu53e      | INSIDE                 | 0.980                                                        | 2.435                          | 330.16             | 803.87             | 2.387                          | 339.16             | 809.61             |
| A_68_P23192161 | chr4:107356258-107356302                          | NM_019872:487       | Dmrtb1        | INSIDE                 | 0.980                                                        | 2.526                          | 702.73             | 1774.96            | 2.474                          | 651.76             | 1612.74            |
| A_68_P26319147 | chr9:14556469-14556513                            | NM_010242:76        | Fut4          | INSIDE                 | 0.980                                                        | 2.217                          | 666.39             | 1477.29            | 2.173                          | 654.42             | 1421.96            |
| A_68_P24537468 | chr6:71583029-71583078                            | NM_001038695:-154   | Kdm3a         | PROMOTER               | 0.980                                                        | 3.072                          | 2362.22            | 7256.83            | 3.009                          | 1491.92            | 4489.71            |
| A_68_P25034847 | chr7:31852339-31852383                            | NM_144556:7407      | Lgi4          | INSIDE                 | 0.980                                                        | 1.931                          | 685.05             | 1322.98            | 1.894                          | 571.57             | 1082.27            |
| A_68_P23193224 | chr4:107526867-107526911                          | NM_001080926:52025  | Lrp8          | INSIDE                 | 0.980                                                        | 1.745                          | 678.85             | 1184.64            | 1.710                          | 524.48             | 896.80             |
| A_68_P22222512 | chr3:69526351-69526395                            | NM_133787:396       | Nmd3          | INSIDE                 | 0.980                                                        | 0.562                          | 1321.36            | 742.32             | 0.551                          | 1101.43            | 606.69             |
| A_68_P30346616 | chr15:76011981-76012026                           | NM_201394:14137     | Plec          | INSIDE                 | 0.980                                                        | 3.494                          | 444.43             | 1552.78            | 3.423                          | 351.97             | 1204.88            |
| A_68_P23984174 | chr5:111611967-111612011                          | NM_024477:303167    | Tie28         | INSIDE                 | 0.980                                                        | 1.823                          | 494.07             | 900.72             | 1.786                          | 446.67             | 797.79             |
| A_68_P27287687 | chr10:80607189-80607233                           | NM_010731:8195      | Zbtb7a        | INSIDE                 | 0.980                                                        | 2.194                          | 1251.84            | 2747.00            | 2.150                          | 909.51             | 1955.09            |
| A_68_P20319175 | chr1:69424592-69424636                            | NM_001038695:-154   | Unknown       | Unknown                | 0.980                                                        | 1.944                          | 1354.40            | 2632.93            | 1.906                          | 1157.69            | 2206.49            |
| A_68_P23368579 | chr4:141795272-141795316                          | NM_001109685:22     | 9030409G11Rik | INSIDE                 | 0.979                                                        | 0.536                          | 1130.87            | 606.50             | 0.525                          | 963.86             | 506.31             |
| A_68_P26349675 | chr9:21748731-21748775                            | NM_144935:6035      | BC018242      | INSIDE                 | 0.979                                                        | 2.028                          | 2302.75            | 4669.95            | 1.986                          | 1619.03            | 3214.96            |
| A_68_P32097107 | chr19:37773571-37773615                           | NM_007811:1295      | Cyp26a1       | INSIDE                 | 0.979                                                        | 0.471                          | 1173.84            | 553.24             | 0.462                          | 971.49             | 448.39             |
| A_68_P32227249 | chr19:60866612-60866656                           | NM_010123:-38       | Eif3a         | PROMOTER               | 0.979                                                        | 1.523                          | 952.50             | 1450.73            | 1.491                          | 853.67             | 1272.68            |
| A_68_P28865543 | chr13:20183326-20183370                           | NM_080288:973       | Elmo1         | INSIDE                 | 0.979                                                        | 1.481                          | 1756.61            | 2601.79            | 1.451                          | 1422.94            | 2064.20            |
| A_68_P25780170 | chr8:36558186-36558230                            | NM_026067:379       | Eri1          | INSIDE                 | 0.979                                                        | 0.426                          | 1745.28            | 743.68             | 0.417                          | 1319.80            | 550.56             |
| A_68_P25087552 | chr7:51718008-51718052                            | NM_198250:20174     | Lrre4b        | INSIDE                 | 0.979                                                        | 1.656                          | 1325.45            | 2194.73            | 1.620                          | 1247.49            | 2021.43            |
| A_68_P25601671 | chr7:150734944-150734988                          | NM_008672:29        | Nap114        | INSIDE                 | 0.979                                                        | 0.592                          | 2591.99            | 1534.04            | 0.579                          | 2194.30            | 1271.39            |
| A_68_P30473222 | chr15:97951292-97951336                           | NM_021514:8824      | Pfkm          | INSIDE                 | 0.979                                                        | 1.863                          | 545.73             | 1016.79            | 1.823                          | 461.51             | 841.56             |
| A_68_P26203591 | chr8:120114052-120114099                          | NM_172285-91885     | Plcg2         | INSIDE                 | 0.979                                                        | 3.164                          | 265.78             | 841.05             | 3.097                          | 227.03             | 703.15             |
| A_68_P31154936 | chr17:34768097-34768141                           | NM_030890:1488      | Prrt1         | INSIDE                 | 0.979                                                        | 2.065                          | 2168.30            | 4478.42            | 2.021                          | 1633.94            | 3302.25            |

| ProbeName      | Target position of probe on CpG island microarray | TargetID            | GeneSymbol    | CpG island Description | Ratio of relative methylation (TiO <sub>2</sub> -NP/Vehicle) | Sham group                     |                    |                    | TiO <sub>2</sub> -H group      |                    |                    |
|----------------|---------------------------------------------------|---------------------|---------------|------------------------|--------------------------------------------------------------|--------------------------------|--------------------|--------------------|--------------------------------|--------------------|--------------------|
|                |                                                   |                     |               |                        |                                                              | Relative methylation (Cy5/Cy3) | Cy3 signal (Input) | Cy5 signal (MeDIP) | Relative methylation (Cy5/Cy3) | Cy3 signal (Input) | Cy5 signal (MeDIP) |
| A_68_P30348895 | chr15:76352647-76352691                           | NM_130893:-109      | Sert1         | PROMOTER               | 0.979                                                        | 3.249                          | 1080.22            | 3510.05            | 3.180                          | 978.98             | 3112.86            |
| A_68_P21584533 | chr2:121943910-121943954                          | NM_145531:190       | Spg11         | INSIDE                 | 0.979                                                        | 2.006                          | 585.34             | 1173.93            | 1.963                          | 566.39             | 1112.05            |
| A_68_P23996936 | chr5:113649993-113650037                          | NM_001033428:-5914  | Tmem211       | PROMOTER               | 0.979                                                        | 0.612                          | 2611.36            | 1597.81            | 0.599                          | 2278.23            | 1364.43            |
| A_68_P29051403 | chr13:54890672-54890716                           | NM_028841:-71       | Tspan17       | PROMOTER               | 0.979                                                        | 1.507                          | 4407.64            | 6640.25            | 1.475                          | 3326.99            | 4906.93            |
| A_68_P23756860 | chr5:65929084-65929128                            | NM_016786:607       | Ube2k         | INSIDE                 | 0.979                                                        | 0.642                          | 2315.85            | 1486.66            | 0.629                          | 1880.74            | 1182.58            |
| A_68_P30572505 | chr16:17201070-17201114                           | NM_009456:493       | Ube2l3        | INSIDE                 | 0.979                                                        | 2.566                          | 2010.01            | 5156.91            | 2.513                          | 1795.94            | 4512.98            |
| A_68_P24007964 | chr5:115577031-115577075                          | NM_175352:7932      | Unc119b       | INSIDE                 | 0.979                                                        | 2.099                          | 973.47             | 2043.29            | 2.054                          | 724.83             | 1488.77            |
| A_68_P26891838 | chr9:122775033-122775077                          | NM_173364:70        | Zfp445        | INSIDE                 | 0.979                                                        | 0.664                          | 1036.49            | 687.72             | 0.649                          | 953.74             | 619.36             |
| A_68_P25505248 | chr7:134486671-134486730                          | NM_146202:2128      | Zfp768        | INSIDE                 | 0.979                                                        | 6.394                          | 365.83             | 2339.20            | 6.262                          | 286.34             | 1792.97            |
| A_68_P20637767 | chr1:137043374-137043418                          | NM_026823:-14       | Arl8a         | PROMOTER               | 0.978                                                        | 1.852                          | 842.77             | 1561.15            | 1.812                          | 798.09             | 1446.17            |
| A_68_P21866714 | chr2:172766163-172766207                          | NM_007557:-390      | Bmp7          | PROMOTER               | 0.978                                                        | 1.710                          | 2912.63            | 4981.20            | 1.672                          | 2002.53            | 3348.33            |
| A_68_P28153230 | chr11:115255314-115255358                         | NM_001080929:12107  | Cdr2l         | PROMOTER               | 0.978                                                        | 2.087                          | 1160.03            | 2420.95            | 2.041                          | 962.20             | 1963.40            |
| A_68_P28685876 | chr12:102321244-102321288                         | NR_038047:606       | D130020L05Rik | INSIDE                 | 0.978                                                        | 1.571                          | 845.94             | 1329.10            | 1.536                          | 916.73             | 1408.13            |
| A_68_P32206764 | chr19:57435985-57436029                           | NM_145505:508       | Fam160b1      | INSIDE                 | 0.978                                                        | 1.877                          | 766.09             | 1437.58            | 1.835                          | 641.15             | 1176.82            |
| A_68_P31927963 | chr19:5306888-5306932                             | NM_001024717:8580   | Gal3st3       | INSIDE                 | 0.978                                                        | 1.720                          | 1482.12            | 2548.76            | 1.683                          | 1307.41            | 2199.86            |
| A_68_P23404326 | chr4:149475854-149475898                          | NM_177366:14265     | Gpr157        | INSIDE                 | 0.978                                                        | 2.830                          | 193.87             | 548.74             | 2.768                          | 190.58             | 527.50             |
| A_68_P28703478 | chr12:105710469-105710513                         | NM_010351:956       | Gsc           | INSIDE                 | 0.978                                                        | 0.389                          | 2081.81            | 810.77             | 0.381                          | 1827.05            | 695.76             |
| A_68_P31304340 | chr17:66460894-66460938                           | NM_001037757:-68    | ORF19         | PROMOTER               | 0.978                                                        | 0.395                          | 1369.36            | 541.08             | 0.386                          | 1096.00            | 423.59             |
| A_68_P23322025 | chr4:133842588-133842632                          | NM_001163794:558    | Pdik11        | INSIDE                 | 0.978                                                        | 0.636                          | 1898.42            | 1207.09            | 0.622                          | 1390.50            | 864.79             |
| A_68_P24777648 | chr6:116623614-116623658                          | NM_178045:218       | Rassf4        | INSIDE                 | 0.978                                                        | 1.595                          | 1647.73            | 2628.07            | 1.560                          | 1354.69            | 2112.89            |
| A_68_P30956056 | chr16:90283863-90283907                           | NM_178923:786       | Scaf4         | INSIDE                 | 0.978                                                        | 1.505                          | 968.35             | 1457.62            | 1.473                          | 817.58             | 1204.02            |
| A_68_P26887499 | chr9:122026546-122026590                          | NM_001164572:185    | Snrk          | INSIDE                 | 0.978                                                        | 2.202                          | 834.93             | 1838.70            | 2.155                          | 752.48             | 1621.30            |
| A_68_P22059401 | chr3:36570355-36570399                            | NM_019510:18713     | Trpc3         | INSIDE                 | 0.978                                                        | 2.619                          | 791.95             | 2074.36            | 2.561                          | 664.29             | 1701.35            |
| A_68_P31016358 | chr17:5342260-5342304                             | NM_001085355:347209 | Arid1b        | INSIDE                 | 0.977                                                        | 3.958                          | 1777.33            | 7034.09            | 3.867                          | 1236.33            | 4780.80            |
| A_68_P23440035 | chr4:155068628-155068672                          | NM_178699:200       | B930041F14Rik | INSIDE                 | 0.977                                                        | 2.625                          | 577.01             | 1514.58            | 2.565                          | 549.08             | 1408.63            |
| A_68_P22412463 | chr3:108209838-108209882                          | NM_001004177:8552   | Celsr2        | INSIDE                 | 0.977                                                        | 3.198                          | 2283.82            | 7304.78            | 3.125                          | 1809.95            | 5656.47            |
| A_68_P21425367 | chr2:91762276-91762320                            | NM_007699:-47       | Chrm4         | PROMOTER               | 0.977                                                        | 0.585                          | 1082.72            | 633.06             | 0.571                          | 830.94             | 474.49             |
| A_68_P25948482 | chr8:72406463-72406507                            | NM_026818:4807      | Cilp2         | INSIDE                 | 0.977                                                        | 1.583                          | 988.34             | 1564.68            | 1.547                          | 916.61             | 1564.48            |
| A_68_P29140850 | chr13:73741332-73741376                           | NM_146047:-95       | C1ptm11       | PROMOTER               | 0.977                                                        | 3.296                          | 1111.79            | 3664.29            | 3.221                          | 902.09             | 2905.54            |
| A_68_P31150930 | chr17:34048600-34048644                           | NM_001199733:2077   | Daxx          | INSIDE                 | 0.977                                                        | 2.635                          | 446.63             | 1176.68            | 2.575                          | 432.74             | 1114.31            |
| A_68_P26581361 | chr9:64189105-64189149                            | NM_001001295:-62    | Dis3l         | PROMOTER               | 0.977                                                        | 0.556                          | 1025.28            | 570.46             | 0.543                          | 945.90             | 514.00             |
| A_68_P21877293 | chr2:174586128-174586172                          | NM_007903:-123      | Edn3          | PROMOTER               | 0.977                                                        | 2.024                          | 1003.70            | 2031.23            | 1.978                          | 878.99             | 1738.72            |
| A_68_P23363267 | chr4:140864773-140864817                          | NM_010139:7640      | Epha2         | INSIDE                 | 0.977                                                        | 2.644                          | 875.68             | 2315.66            | 2.584                          | 763.89             | 1974.11            |
| A_68_P29083939 | chr13:60277184-60277228                           | NM_008086:1690      | Gas1          | INSIDE                 | 0.977                                                        | 0.670                          | 2245.18            | 1505.13            | 0.655                          | 1665.53            | 1090.72            |
| A_68_P20679836 | chr1:145586729-145586773                          | NM_001038594:-826   | Glrx2         | PROMOTER               | 0.977                                                        | 0.615                          | 1449.85            | 891.55             | 0.601                          | 1225.25            | 735.82             |
| A_68_P21338760 | chr2:74520854-74520898                            | NM_008273:427       | Hoxd11        | INSIDE                 | 0.977                                                        | 2.046                          | 572.41             | 1171.33            | 1.998                          | 554.02             | 1107.19            |
| A_68_P26674975 | chr9:81525929-81525973                            | NM_010482:209       | Htr1b         | INSIDE                 | 0.977                                                        | 0.622                          | 1087.38            | 676.59             | 0.608                          | 832.45             | 506.22             |
| A_68_P26423542 | chr9:35378046-35378090                            | NM_029762:-414      | Hyls1         | PROMOTER               | 0.977                                                        | 1.684                          | 2019.99            | 3401.85            | 1.645                          | 1561.96            | 2570.02            |
| A_68_P25031178 | chr7:31141047-31141091                            | NM_175478:6723      | Lrfn3         | INSIDE                 | 0.977                                                        | 2.315                          | 750.13             | 1736.85            | 2.261                          | 577.61             | 1306.04            |
| A_68_P28095691 | chr11:105224580-105224624                         | NM_172568:93447     | Marchf10      | INSIDE                 | 0.977                                                        | 3.035                          | 583.50             | 1770.92            | 2.964                          | 478.99             | 1419.92            |
| A_68_P24591434 | chr6:83052524-83052568                            | NM_026744:-6555     | Mrp153        | PROMOTER               | 0.977                                                        | 0.487                          | 1127.49            | 548.90             | 0.476                          | 917.90             | 436.65             |
| A_68_P24974396 | chr7:13639929-13639973                            | NM_145819:163       | Mzf1          | INSIDE                 | 0.977                                                        | 0.684                          | 1426.34            | 975.04             | 0.668                          | 1160.36            | 775.00             |
| A_68_P21820162 | chr2:164683144-164683188                          | NM_011125:42        | Pltp          | INSIDE                 | 0.977                                                        | 0.491                          | 1594.58            | 783.21             | 0.480                          | 1299.47            | 623.55             |
| A_68_P27267071 | chr10:76728631-76728675                           | NM_030262:6608      | Pofut2        | INSIDE                 | 0.977                                                        | 2.304                          | 738.07             | 1700.60            | 2.251                          | 591.94             | 1332.31            |
| A_68_P32957128 | chr17:8534244-8534288                             | NM_178774:663       | Prr18         | INSIDE                 | 0.977                                                        | 1.822                          | 1223.40            | 2229.03            | 1.781                          | 1129.82            | 2012.17            |
| A_68_P26825466 | chr9:110629375-110629419                          | NM_001083936:15718  | Pth1r         | INSIDE                 | 0.977                                                        | 3.170                          | 3255.82            | 10320.97           | 3.097                          | 2223.98            | 6888.59            |
| A_68_P21843310 | chr2:168575642-168575686                          | NM_175303:17037     | Sall4         | INSIDE                 | 0.977                                                        | 1.713                          | 525.29             | 899.66             | 1.674                          | 475.38             | 795.59             |
| A_68_P21116407 | chr2:32470667-32470711                            | NM_001025310:8208   | St6galnac6    | INSIDE                 | 0.977                                                        | 3.117                          | 1219.51            | 3800.73            | 3.045                          | 1024.38            | 3118.84            |
| A_68_P27507136 | chr10:121534175-121534219                         | NM_153059:-38       | Tmem5         | PROMOTER               | 0.977                                                        | 1.616                          | 1674.61            | 2706.35            | 1.580                          | 1416.59            | 2237.63            |
| A_68_P22059402 | chr3:36570442-36570486                            | NM_019510:18625     | Trpc3         | INSIDE                 | 0.977                                                        | 2.023                          | 1040.82            | 2105.14            | 1.976                          | 850.40             | 1680.54            |
| A_68_P30379485 | chr15:81602412-81602456                           | NM_001081016:27157  | Zc3h7b        | INSIDE                 | 0.977                                                        | 2.220                          | 1012.45            | 2247.43            | 2.168                          | 780.10             | 1691.56            |

| ProbeName      | Target position of probe on CpG island microarray | TargetID                 | GeneSymbol    | CpG island Description | Ratio of relative methylation (TiO <sub>2</sub> -NP/Vehicle) | Sham group                     |                    |                    | TiO <sub>2</sub> -H group      |                    |                    |
|----------------|---------------------------------------------------|--------------------------|---------------|------------------------|--------------------------------------------------------------|--------------------------------|--------------------|--------------------|--------------------------------|--------------------|--------------------|
|                |                                                   |                          |               |                        |                                                              | Relative methylation (Cy5/Cy3) | Cy3 signal (Input) | Cy5 signal (MeDIP) | Relative methylation (Cy5/Cy3) | Cy3 signal (Input) | Cy5 signal (MeDIP) |
| A_68_P27781839 | chr11:49017033-49017077                           | NM_001024846:53          | Zfp62         | INSIDE                 | 0.977                                                        | 2.007                          | 2219.29            | 4454.45            | 1.961                          | 1945.58            | 3814.57            |
| A_68_P29059922 | chr13:56322977-56323021                           | ENSMUST00000127754:22303 |               | DOWNSTREAM             | 0.977                                                        | 2.973                          | 957.88             | 2847.64            | 2.903                          | 849.62             | 2466.71            |
| A_68_P23576262 | chr5:31370994-31371038                            | NM_023525:13833          | Cad           | INSIDE                 | 0.976                                                        | 1.979                          | 1458.58            | 2886.34            | 1.932                          | 1161.40            | 2243.57            |
| A_68_P21114928 | chr2:32218406-32218450                            | NM_028412:-325           | Ciz1          | DIVERGENT_PROMOTER     | 0.976                                                        | 1.869                          | 506.90             | 947.20             | 1.824                          | 508.52             | 927.35             |
| A_68_P27278592 | chr10:79198242-79198286                           | NM_008226:18886          | Hcn2          | INSIDE                 | 0.976                                                        | 1.766                          | 1097.74            | 1938.15            | 1.724                          | 1007.25            | 1736.10            |
| A_68_P32147194 | chr19:47089078-47089122                           | NM_146100:-87            | Ina           | PROMOTER               | 0.976                                                        | 0.523                          | 3667.21            | 1916.31            | 0.510                          | 3001.83            | 1531.16            |
| A_68_P21147645 | chr2:38207336-38207380                            | NM_010710:531            | Lhx2          | INSIDE                 | 0.976                                                        | 0.632                          | 864.99             | 546.87             | 0.617                          | 799.66             | 493.45             |
| A_68_P32135962 | chr19:45100671-45100715                           | NM_001130526:8068        | Lzts2         | INSIDE                 | 0.976                                                        | 3.964                          | 1514.94            | 6005.14            | 3.870                          | 1213.70            | 4696.96            |
| A_68_P30370604 | chr15:80003678-80003722                           | NM_010795:-450           | Mgat3         | PROMOTER               | 0.976                                                        | 2.172                          | 11821.68           | 25672.58           | 2.119                          | 8110.50            | 17184.88           |
| A_68_P28174637 | chr11:118770429-118770473                         | NM_001024931:436         | Rbfox3        | INSIDE                 | 0.976                                                        | 0.661                          | 4278.64            | 2827.43            | 0.645                          | 3798.84            | 2451.21            |
| A_68_P25090604 | chr7:52263215-52263259                            | NM_001008422:8383        | Scafl1        | INSIDE                 | 0.976                                                        | 2.000                          | 1363.86            | 2727.31            | 1.952                          | 1035.03            | 2020.16            |
| A_68_P28469857 | chr12:60113204-60113248                           | NM_009147:-222           | Sec23a        | DIVERGENT_PROMOTER     | 0.976                                                        | 1.644                          | 6327.96            | 10405.71           | 1.605                          | 4641.74            | 7448.01            |
| A_68_P25049870 | chr7:36322643-36322687                            | NM_028034:99             | Tdtd12        | INSIDE                 | 0.976                                                        | 3.088                          | 6114.63            | 18884.77           | 3.015                          | 4637.15            | 13983.05           |
| A_68_P30849198 | A_68_P30849198                                    |                          |               | Unknown                | 0.976                                                        | 3.231                          | 305.26             | 986.23             | 3.154                          | 328.75             | 1036.88            |
| A_68_P23226517 | chr4:115570669-115570713                          | ENSMUST00000165938:7420  |               | INSIDE                 | 0.976                                                        | 1.480                          | 2350.66            | 3479.43            | 1.445                          | 1926.69            | 2783.98            |
| A_68_P27686041 | chr11:31865736-31865780                           | NM_026262:126            | 4930524B15Rik | INSIDE                 | 0.975                                                        | 3.018                          | 695.12             | 2098.16            | 2.944                          | 570.19             | 1678.47            |
| A_68_P30338797 | chr15:74502578-74502622                           | NM_018790:400            | Arc           | INSIDE                 | 0.975                                                        | 1.540                          | 1185.35            | 1825.67            | 1.502                          | 1091.35            | 1639.54            |
| A_68_P31067114 | chr17:15867919-15867967                           | NM_007690:26012          | Chd1          | INSIDE                 | 0.975                                                        | 2.854                          | 324.90             | 927.39             | 2.784                          | 305.46             | 850.25             |
| A_68_P29671492 | chr14:65696284-65696328                           | NM_018788:20637          | Extl3         | INSIDE                 | 0.975                                                        | 2.313                          | 280.87             | 649.69             | 2.256                          | 233.85             | 527.46             |
| A_68_P27185079 | chr10:61732442-61732486                           | NM_001146100:70705       | Hk1           | INSIDE                 | 0.975                                                        | 4.017                          | 4116.51            | 16537.39           | 3.916                          | 2906.27            | 11380.05           |
| A_68_P23637418 | chr5:42154713-42154757                            | NM_007524:725            | Nkx3-2        | INSIDE                 | 0.975                                                        | 0.641                          | 1306.67            | 837.10             | 0.624                          | 1040.15            | 649.42             |
| A_68_P30421712 | chr15:88692211-88692255                           | NM_145478:-391           | Pim3          | PROMOTER               | 0.975                                                        | 0.602                          | 1174.67            | 707.32             | 0.587                          | 937.72             | 550.57             |
| A_68_P30346543 | chr15:76003047-76003091                           | NM_201394:23072          | Plec          | INSIDE                 | 0.975                                                        | 1.828                          | 787.27             | 1439.32            | 1.782                          | 693.63             | 1235.86            |
| A_68_P30447267 | chr15:93331510-93331555                           | NM_001033217:94790       | Prickle1      | INSIDE                 | 0.975                                                        | 2.282                          | 442.94             | 1010.69            | 2.224                          | 375.40             | 835.01             |
| A_68_P21747514 | chr2:151907523-151907567                          | NM_001160410:280         | Scrt2         | INSIDE                 | 0.975                                                        | 0.649                          | 1094.32            | 710.30             | 0.633                          | 926.81             | 586.47             |
| A_68_P26239400 | chr8:125877888-125877932                          | NM_172287:21298          | Spire2        | INSIDE                 | 0.975                                                        | 3.363                          | 569.51             | 1915.37            | 3.278                          | 381.42             | 1250.24            |
| A_68_P25425957 | chr7:119823141-119823185                          | NM_001166584:329         | Tead1         | INSIDE                 | 0.975                                                        | 2.037                          | 684.18             | 1393.77            | 1.986                          | 652.73             | 1296.55            |
| A_68_P25026078 | chr7:30023443-30023487                            | NM_001110201:123         | Yif1b         | INSIDE                 | 0.975                                                        | 0.662                          | 2872.41            | 1900.29            | 0.645                          | 2226.40            | 1436.72            |
| A_68_P24118492 | chr5:136387366-136387410                          | NM_018871:23123          | Ywhag         | INSIDE                 | 0.975                                                        | 2.877                          | 598.14             | 1720.58            | 2.805                          | 533.54             | 1496.64            |
| A_68_P24951462 | chr7:4945928-4945972                              | NM_026741:1753           | Zfp579        | INSIDE                 | 0.975                                                        | 1.980                          | 447.72             | 886.71             | 1.932                          | 421.27             | 813.87             |
| A_68_P30602964 | A_68_P30602964                                    |                          |               | Unknown                | 0.975                                                        | 3.257                          | 472.59             | 1539.02            | 3.175                          | 456.35             | 1448.71            |
| A_68_P28094596 | chr11:105026660-105026704                         | ENSMUST00000118770:1252  |               | INSIDE                 | 0.975                                                        | 2.859                          | 451.76             | 1291.45            | 2.787                          | 369.47             | 1029.71            |
| A_68_P23340288 | chr4:137074524-137074568                          | NM_008305:49829          | Hspg2         | INSIDE                 | 0.974                                                        | 2.648                          | 2867.07            | 7590.62            | 2.579                          | 2334.33            | 6021.37            |
| A_68_P25044863 | chr7:35439623-35439667                            | NM_146188:-1784          | Kctd15        | PROMOTER               | 0.974                                                        | 0.607                          | 867.27             | 526.51             | 0.591                          | 726.25             | 429.41             |
| A_68_P29177385 | chr13:81850332-81850377                           | NM_028372:-61            | Mblac2        | DIVERGENT_PROMOTER     | 0.974                                                        | 0.339                          | 2536.50            | 860.53             | 0.331                          | 1973.15            | 652.29             |
| A_68_P25954890 | chr8:73437278-73437322                            | NM_173013:7428           | Mtsp1s        | INSIDE                 | 0.974                                                        | 2.538                          | 1489.36            | 3779.47            | 2.471                          | 1139.43            | 2815.52            |
| A_68_P29482962 | chr14:27489116-27489160                           | NM_178668:194            | Pde12         | INSIDE                 | 0.974                                                        | 0.620                          | 1054.13            | 653.29             | 0.603                          | 913.26             | 551.02             |
| A_68_P24984542 | chr7:17612840-17612884                            | NM_011155:401            | Ppp5c         | INSIDE                 | 0.974                                                        | 2.416                          | 1936.40            | 4678.89            | 2.353                          | 1557.84            | 3665.03            |
| A_68_P31311925 | chr17:67704118-67704162                           | NM_008984:-341           | Ptprrn        | PROMOTER               | 0.974                                                        | 0.640                          | 1013.74            | 648.50             | 0.623                          | 863.34             | 537.95             |
| A_68_P30365304 | chr15:79082520-79082564                           | NM_020516:2636           | Slc16a8       | INSIDE                 | 0.974                                                        | 1.490                          | 1849.42            | 2754.95            | 1.451                          | 1669.98            | 2422.87            |
| A_68_P32143399 | chr19:46423459-46423503                           | NM_029186:-7889          | Tmem180       | PROMOTER               | 0.974                                                        | 1.987                          | 383.91             | 762.94             | 1.936                          | 368.41             | 713.20             |
| A_68_P22973922 | chr4:63678515-63678559                            | NM_011607:29513          | Tnc           | INSIDE                 | 0.974                                                        | 2.302                          | 1958.86            | 4509.35            | 2.242                          | 1621.52            | 3636.18            |
| A_68_P23204068 | chr4:109723690-109723734                          |                          |               | Unknown                | 0.974                                                        | 2.594                          | 696.53             | 1806.75            | 2.526                          | 702.31             | 1774.22            |
| A_68_P31623411 | chr18:36508072-36508116                           | NM_001081365:-183        | 0610010012Rik | PROMOTER               | 0.973                                                        | 1.908                          | 2562.23            | 4888.73            | 1.857                          | 1780.99            | 3307.21            |
| A_68_P31619440 | chr18:35814836-35814880                           | NM_027222:-5837          | 2010001M09Rik | PROMOTER               | 0.973                                                        | 0.503                          | 1312.48            | 660.13             | 0.489                          | 1101.28            | 538.76             |
| A_68_P21037978 | chr2:17969077-17969121                            | NM_028317:978            | 2810030E01Rik | INSIDE                 | 0.973                                                        | 3.426                          | 2318.78            | 7943.93            | 3.335                          | 1828.23            | 6097.29            |
| A_68_P26521622 | chr9:53418206-53418250                            | NM_144784:227            | Acat1         | INSIDE                 | 0.973                                                        | 1.614                          | 810.98             | 1308.68            | 1.571                          | 834.70             | 1311.19            |
| A_68_P32020401 | chr19:23968179-23968223                           | NM_177034:134835         | Apba1         | INSIDE                 | 0.973                                                        | 2.201                          | 1184.79            | 2607.64            | 2.142                          | 992.30             | 2125.58            |
| A_68_P22186537 | chr3:62143246-62143290                            | NM_001081295:570         | Arlhgef26     | INSIDE                 | 0.973                                                        | 0.638                          | 963.31             | 614.91             | 0.621                          | 959.28             | 595.76             |
| A_68_P31977527 | chr19:16059339-16059383                           | NM_198019:119            | Cep78         | INSIDE                 | 0.973                                                        | 0.683                          | 1481.56            | 1012.63            | 0.665                          | 1291.48            | 858.95             |
| A_68_P30511521 | chr16:4679480-4679524                             | NM_030205:218            | Coro7         | INSIDE                 | 0.973                                                        | 1.445                          | 2711.21            | 3917.38            | 1.405                          | 2028.75            | 2851.38            |



| ProbeName      | Target position of probe on CpG island microarray | TargetID                | GeneSymbol    | CpG island Description | Ratio of relative methylation (TiO <sub>2</sub> -NP/Vehicle) | Sham group                     |                    |                    | TiO <sub>2</sub> -H group      |                    |                    |
|----------------|---------------------------------------------------|-------------------------|---------------|------------------------|--------------------------------------------------------------|--------------------------------|--------------------|--------------------|--------------------------------|--------------------|--------------------|
|                |                                                   |                         |               |                        |                                                              | Relative methylation (Cy5/Cy3) | Cy3 signal (Input) | Cy5 signal (MeDIP) | Relative methylation (Cy5/Cy3) | Cy3 signal (Input) | Cy5 signal (MeDIP) |
| A_68_P30576507 | chr16:17911333-17911377                           | NM_001081633:87         | Dgerl4        | INSIDE                 | 0.973                                                        | 2.101                          | 834.08             | 1752.47            | 2.045                          | 708.67             | 1448.95            |
| A_68_P27490918 | chr10:118890399-118890443                         | NM_133442:949           | Grip1         | PROMOTER               | 0.973                                                        | 0.502                          | 1232.00            | 618.41             | 0.488                          | 1005.16            | 490.87             |
| A_68_P25945210 | chr8:71405256-71405300                            | NM_008509:825           | Lpl           | INSIDE                 | 0.973                                                        | 0.518                          | 2080.67            | 1077.04            | 0.503                          | 1764.77            | 888.48             |
| A_68_P26506085 | chr9:50665071-50665115                            | NM_028614:53            | Ppp2r1b       | INSIDE                 | 0.973                                                        | 1.439                          | 2614.80            | 3762.33            | 1.400                          | 2172.63            | 3042.22            |
| A_68_P21838401 | chr2:167757841-167757885                          | NM_011201:36            | Ptpn1         | INSIDE                 | 0.973                                                        | 0.517                          | 1051.70            | 544.18             | 0.503                          | 1023.82            | 515.47             |
| A_68_P24428216 | chr6:48546831-48546875                            | NM_001079901:2971       | Repin1        | INSIDE                 | 0.973                                                        | 2.168                          | 619.59             | 1343.25            | 2.108                          | 512.76             | 1081.08            |
| A_68_P27222447 | chr10:68675289-68675333                           | NM_001081347:-94        | Rhobtb1       | PROMOTER               | 0.973                                                        | 2.827                          | 932.84             | 2636.79            | 2.751                          | 756.59             | 2081.29            |
| A_68_P30118686 | chr15:32174840-32174884                           | NM_009154:295           | Sema5a        | PROMOTER               | 0.973                                                        | 0.599                          | 910.67             | 545.19             | 0.583                          | 707.60             | 412.35             |
| A_68_P27552579 | chr11:3435873-3435917                             | NM_001159284:3401       | Smtm          | INSIDE                 | 0.973                                                        | 1.752                          | 588.70             | 1031.64            | 1.705                          | 579.55             | 988.06             |
| A_68_P20345417 | chr1:73953929-73953973                            | NM_027884:217071        | Tns1          | DOWNSTREAM             | 0.973                                                        | 2.227                          | 855.46             | 1905.15            | 2.168                          | 732.78             | 1588.49            |
| A_68_P25506523 | chr7:134758122-134758166                          | NM_177226:-197          | Zfp629        | PROMOTER               | 0.973                                                        | 0.526                          | 1502.29            | 790.72             | 0.512                          | 1249.45            | 640.12             |
| A_68_P30560721 | chr16:14159223-14159267                           | NM_001081154:123        | 4921513D23Rik | INSIDE                 | 0.972                                                        | 1.435                          | 2759.99            | 3961.06            | 1.395                          | 1903.99            | 2655.38            |
| A_68_P23602806 | chr5:36100352-36100396                            | NM_001177696:-154       | Ablim2        | PROMOTER               | 0.972                                                        | 1.753                          | 649.81             | 1138.80            | 1.704                          | 549.81             | 936.86             |
| A_68_P28686888 | chr12:103196108-103196152                         | NM_029705:323           | Atxn3         | INSIDE                 | 0.972                                                        | 1.468                          | 1945.95            | 2856.10            | 1.427                          | 1782.70            | 2544.49            |
| A_68_P33015625 | chr1_random:51092-51145                           | NM_026866:134220        | Disp1         | INSIDE                 | 0.972                                                        | 4.052                          | 232.86             | 943.57             | 3.940                          | 203.36             | 801.25             |
| A_68_P27849839 | chr11:61498513-61498557                           | NM_178618:623           | Fam83g        | INSIDE                 | 0.972                                                        | 1.531                          | 2052.44            | 3143.21            | 1.489                          | 1596.08            | 2376.43            |
| A_68_P21874750 | chr2:174153901-174153945                          | NM_001077510:-1667      | Gnas          | PROMOTER               | 0.972                                                        | 1.869                          | 1350.12            | 2523.31            | 1.816                          | 1243.89            | 2259.27            |
| A_68_P23753095 | chr5:65213443-65213487                            | NM_008453:18703         | Klf3          | INSIDE                 | 0.972                                                        | 2.420                          | 4090.97            | 9899.64            | 2.352                          | 3096.05            | 7281.08            |
| A_68_P27180706 | chr10:60938993-60939037                           | NM_153542:434           | Lrre20        | INSIDE                 | 0.972                                                        | 1.527                          | 1138.09            | 1738.17            | 1.484                          | 1050.16            | 1558.88            |
| A_68_P26551402 | chr9:58884501-58884545                            | NM_001042752:-274       | Neo1          | PROMOTER               | 0.972                                                        | 3.181                          | 2515.51            | 8000.97            | 3.092                          | 2099.48            | 6492.63            |
| A_68_P21823566 | chr2:165213753-165213797                          | NM_178411:-15           | Zfp334        | PROMOTER               | 0.972                                                        | 0.615                          | 1111.51            | 683.48             | 0.598                          | 920.96             | 550.71             |
| A_68_P24951457 | chr7:4945305-4945349                              | NM_026741:2377          | Zfp579        | INSIDE                 | 0.972                                                        | 1.821                          | 1574.76            | 2867.78            | 1.770                          | 1306.81            | 2312.55            |
| A_68_P23320094 | chr4:133466780-133466824                          | AK015234:96             |               | INSIDE                 | 0.972                                                        | 1.863                          | 826.65             | 1539.80            | 1.811                          | 730.81             | 1323.62            |
| A_68_P26215962 | chr8:122292157-122292201                          | NM_028883:10138         | 4632415K11Rik | INSIDE                 | 0.971                                                        | 2.449                          | 626.16             | 1533.72            | 2.378                          | 518.40             | 1232.88            |
| A_68_P27473558 | chr10:115550897-115550941                         | NM_001161855:55         | 4933416C03Rik | INSIDE                 | 0.971                                                        | 1.953                          | 1190.25            | 2324.22            | 1.897                          | 1072.90            | 2035.22            |
| A_68_P28171533 | chr11:118338257-118338301                         | NM_172573:5             | Engase        | INSIDE                 | 0.971                                                        | 0.462                          | 1195.86            | 552.07             | 0.448                          | 1010.57            | 452.84             |
| A_68_P24024962 | chr5:118605340-118605384                          | NM_172721:105           | Fbxw8         | INSIDE                 | 0.971                                                        | 1.612                          | 660.95             | 1065.53            | 1.566                          | 626.27             | 980.71             |
| A_68_P29660046 | chr14:63859832-63859876                           | NM_008092:4243          | Gata4         | INSIDE                 | 0.971                                                        | 2.882                          | 834.39             | 2404.36            | 2.798                          | 736.16             | 2059.75            |
| A_68_P21874752 | chr2:174154225-174154269                          | NM_001077510:-1343      | Gnas          | PROMOTER               | 0.971                                                        | 2.941                          | 634.88             | 1867.23            | 2.855                          | 572.98             | 1635.85            |
| A_68_P28266914 | chr12:16807531-16807575                           | NM_015764:140           | Greb1         | INSIDE                 | 0.971                                                        | 2.246                          | 630.05             | 1414.97            | 2.181                          | 603.58             | 1316.49            |
| A_68_P21840418 | chr2:168094705-168094749                          | NM_001081134:105        | Keng1         | INSIDE                 | 0.971                                                        | 3.398                          | 1086.03            | 3689.96            | 3.301                          | 884.92             | 2920.90            |
| A_68_P22530124 | chr3:130809206-130809250                          | NM_010703:-4157         | Lef1          | PROMOTER               | 0.971                                                        | 1.913                          | 454.89             | 870.06             | 1.858                          | 426.51             | 792.38             |
| A_68_P32135963 | chr19:45100793-45100837                           | NM_001130526:8192       | Lzts2         | INSIDE                 | 0.971                                                        | 1.825                          | 849.89             | 1551.07            | 1.772                          | 641.09             | 1135.76            |
| A_68_P29437674 | chr14:19071169-19071213                           | NM_011584:430           | Nr1d2         | INSIDE                 | 0.971                                                        | 0.578                          | 1302.30            | 753.13             | 0.562                          | 1184.57            | 665.39             |
| A_68_P26825588 | chr9:110645482-110645526                          | NM_001083936:-390       | Pth1r         | PROMOTER               | 0.971                                                        | 0.599                          | 3626.38            | 2172.34            | 0.582                          | 2620.71            | 1525.09            |
| A_68_P20878434 | chr1:182834646-182834690                          | NM_133705:264           | Pycr2         | INSIDE                 | 0.971                                                        | 3.018                          | 557.10             | 1681.11            | 2.930                          | 528.81             | 1549.31            |
| A_68_P32099687 | chr19:38199117-38199161                           | NM_011255:163           | Rbp4          | INSIDE                 | 0.971                                                        | 0.608                          | 907.04             | 551.75             | 0.590                          | 788.52             | 465.61             |
| A_68_P27795628 | chr11:51577154-51577198                           | NM_025535:12            | Sar1b         | INSIDE                 | 0.971                                                        | 1.390                          | 3060.05            | 4254.21            | 1.350                          | 2587.65            | 3494.02            |
| A_68_P30575738 | chr16:17797523-17797567                           | NM_153790:170           | Scarf2        | INSIDE                 | 0.971                                                        | 2.068                          | 6359.23            | 13153.07           | 2.009                          | 4977.00            | 9996.54            |
| A_68_P22286845 | chr3:83570356-83570400                            | NM_009144:136           | Sfp2          | INSIDE                 | 0.971                                                        | 1.885                          | 816.44             | 1538.69            | 1.830                          | 721.69             | 1320.64            |
| A_68_P28116268 | chr11:108873014-108873058                         | ENSMUST00000119655:4072 |               | DOWNSTREAM             | 0.971                                                        | 1.853                          | 1103.12            | 2044.13            | 1.799                          | 840.74             | 1512.54            |
| A_68_P25087019 | chr7:51615634-51615678                            | NM_027049:14744         | 1700008O03Rik | INSIDE                 | 0.970                                                        | 0.615                          | 983.82             | 605.52             | 0.597                          | 851.36             | 508.18             |
| A_68_P28525479 | chr12:72411396-72411440                           | NM_001190466:548        | Dact1         | INSIDE                 | 0.970                                                        | 1.623                          | 5022.66            | 8149.95            | 1.573                          | 3551.70            | 5587.56            |
| A_68_P28157767 | chr11:116029485-116029529                         | NM_172571:-14           | Fbfl1         | PROMOTER               | 0.970                                                        | 4.851                          | 341.38             | 1707.97            | 4.811                          | 315.61             | 1531.16            |
| A_68_P29101872 | chr13:65213921-65213965                           | NM_001083901:348        | Hiat1         | INSIDE                 | 0.970                                                        | 2.047                          | 374.73             | 766.90             | 1.984                          | 340.45             | 675.61             |
| A_68_P27950544 | chr11:79517837-79517881                           | NR_029579:-7612         | Mir193        | PROMOTER               | 0.970                                                        | 1.806                          | 857.19             | 1547.81            | 1.752                          | 653.94             | 1145.67            |
| A_68_P24055453 | chr5:123845311-123845355                          | NM_177582:505           | Mlxip         | INSIDE                 | 0.970                                                        | 0.648                          | 1420.28            | 920.71             | 0.629                          | 1159.24            | 729.07             |
| A_68_P31632606 | chr18:38358924-38358968                           | NM_029357:10470         | Pedh1         | INSIDE                 | 0.970                                                        | 2.628                          | 1795.93            | 4719.59            | 2.549                          | 1291.78            | 3292.12            |
| A_68_P32745693 | chrX:147954890-147954934                          | NM_177201:-302          | Phf8          | PROMOTER               | 0.970                                                        | 2.347                          | 3293.57            | 7730.06            | 2.277                          | 1522.83            | 3467.79            |
| A_68_P25972617 | chr8:77737759-77737803                            | NM_029182:-62           | Rasd2         | PROMOTER               | 0.970                                                        | 2.110                          | 1152.07            | 2430.50            | 2.047                          | 1049.70            | 2149.08            |
| A_68_P27275565 | chr10:78243326-78243370                           | NM_009200:108           | Ste1a6        | INSIDE                 | 0.970                                                        | 1.966                          | 597.28             | 1174.40            | 1.908                          | 617.78             | 1178.55            |

| ProbeName      | Target position of probe on CpG island microarray | TargetID                | GeneSymbol    | CpG island Description | Ratio of relative methylation (TiO <sub>2</sub> -NP/Vehicle) | Sham group                     |                    |                    | TiO <sub>2</sub> -H group      |                    |                    |
|----------------|---------------------------------------------------|-------------------------|---------------|------------------------|--------------------------------------------------------------|--------------------------------|--------------------|--------------------|--------------------------------|--------------------|--------------------|
|                |                                                   |                         |               |                        |                                                              | Relative methylation (Cy5/Cy3) | Cy3 signal (Input) | Cy5 signal (MeDIP) | Relative methylation (Cy5/Cy3) | Cy3 signal (Input) | Cy5 signal (MeDIP) |
| A_68_P24092031 | chr5:130555095-130555139                          | NM_001130476-239        | Tpst1         | PROMOTER               | 0.970                                                        | 3.754                          | 1010.19            | 3791.84            | 3.639                          | 843.27             | 3068.80            |
| A_68_P29438117 | chr14:19159490-19159534                           | NM_009455:4846          | Ube2e1        | INSIDE                 | 0.970                                                        | 1.437                          | 1631.20            | 2343.89            | 1.393                          | 1450.95            | 2021.53            |
| A_68_P20191088 | chr1:43884115-43884159                            | NM_026430:417           | Uxs1          | INSIDE                 | 0.970                                                        | 1.583                          | 1301.83            | 2060.39            | 1.535                          | 1120.06            | 1719.28            |
| A_68_P20350533 | chr1:74838685-74838729                            | NM_009518:114           | Wnt10a        | INSIDE                 | 0.970                                                        | 0.740                          | 2570.24            | 2060.83            | 0.717                          | 2048.58            | 1469.73            |
| A_68_P31939674 | chr19:7491304-7491348                             | NM_175381:-788          | 2700081015Rik | PROMOTER               | 0.969                                                        | 1.520                          | 965.20             | 1466.89            | 1.473                          | 876.30             | 1291.04            |
| A_68_P22150381 | chr3:54703304-54703351                            | NM_177854:16482         | 6030405A18Rik | INSIDE                 | 0.969                                                        | 3.070                          | 393.95             | 1209.27            | 2.975                          | 324.90             | 966.51             |
| A_68_P23417009 | chr4:151552981-151553025                          | NM_001146057-7240       | Acof7         | PROMOTER               | 0.969                                                        | 1.607                          | 1097.55            | 1763.26            | 1.556                          | 935.98             | 1456.63            |
| A_68_P27809325 | chr11:54117457-54117501                           | NM_001033597-227        | Acsf6         | PROMOTER               | 0.969                                                        | 1.779                          | 3088.94            | 5494.13            | 1.723                          | 2481.90            | 4276.18            |
| A_68_P21105432 | chr2:30679697-30679741                            | NM_133346:4102          | Asb6          | INSIDE                 | 0.969                                                        | 2.592                          | 539.86             | 1399.11            | 2.511                          | 410.86             | 1031.65            |
| A_68_P32536864 | chrX:91226158-91226202                            | NR_028320:12186         | AU015836      | DOWNSTREAM             | 0.969                                                        | 2.802                          | 483.67             | 1355.22            | 2.714                          | 255.56             | 693.61             |
| A_68_P27649723 | chr11:24064200-24064244                           | NM_001159290:83528      | Bcl11a        | INSIDE                 | 0.969                                                        | 2.943                          | 1208.68            | 3556.93            | 2.851                          | 1018.30            | 2903.27            |
| A_68_P28452660 | chr12:56701063-56701107                           | NM_020287:1181          | Insm2         | INSIDE                 | 0.969                                                        | 0.396                          | 1845.14            | 731.48             | 0.384                          | 1511.96            | 580.89             |
| A_68_P32029537 | chr19:25484593-25484638                           | NM_181404:172924        | Kank1         | INSIDE                 | 0.969                                                        | 3.483                          | 2154.07            | 7501.80            | 3.374                          | 1536.95            | 5185.68            |
| A_68_P27267070 | chr10:76728491-76728535                           | NM_030262:6468          | Pofut2        | INSIDE                 | 0.969                                                        | 2.232                          | 1263.16            | 2819.82            | 2.163                          | 1016.41            | 2198.40            |
| A_68_P24428218 | chr6:48547068-48547112                            | NM_001079901:3209       | Repin1        | INSIDE                 | 0.969                                                        | 2.236                          | 1659.60            | 3710.07            | 2.165                          | 1377.35            | 2982.11            |
| A_68_P25228918 | chr7:80554115-80554159                            | NM_177740:33731         | Rgma          | INSIDE                 | 0.969                                                        | 2.092                          | 1099.96            | 2301.04            | 2.027                          | 810.80             | 1643.35            |
| A_68_P23339116 | chr4:136852284-136852328                          | NM_009523:18757         | Wnt4          | INSIDE                 | 0.969                                                        | 4.338                          | 1849.93            | 8025.39            | 4.202                          | 1426.82            | 5995.50            |
| A_68_P27287689 | chr10:80607406-80607450                           | NM_010731:8413          | Zbtb7a        | INSIDE                 | 0.969                                                        | 1.930                          | 911.26             | 1758.90            | 1.871                          | 733.71             | 1372.55            |
| A_68_P27686040 | chr11:31865634-31865678                           | NM_026262:24            | 4930524B15Rik | INSIDE                 | 0.968                                                        | 2.096                          | 2028.28            | 4251.89            | 2.029                          | 1642.47            | 3332.84            |
| A_68_P28612729 | chr12:88224702-88224747                           | NM_145836:1040          | 6430527G18Rik | INSIDE                 | 0.968                                                        | 0.417                          | 1236.63            | 515.22             | 0.403                          | 1032.77            | 416.67             |
| A_68_P28724527 | chr12:109155388-109155432                         | NM_001079883:86214      | Bcl11b        | INSIDE                 | 0.968                                                        | 2.041                          | 561.66             | 1146.15            | 1.976                          | 454.74             | 898.70             |
| A_68_P23818501 | chr5:77286574-77286618                            | NM_001163793:16973      | C530008M17Rik | INSIDE                 | 0.968                                                        | 3.192                          | 3341.82            | 10666.19           | 3.091                          | 2226.22            | 6881.31            |
| A_68_P26844413 | chr9:114299730-114299774                          | NM_019922:78            | Crtap         | INSIDE                 | 0.968                                                        | 1.794                          | 1238.57            | 2222.39            | 1.737                          | 1120.55            | 1946.50            |
| A_68_P31227870 | chr17:50432887-50432931                           | NM_010021:16            | Dazl          | INSIDE                 | 0.968                                                        | 2.598                          | 1094.53            | 2843.43            | 2.515                          | 1119.65            | 2816.38            |
| A_68_P30642684 | chr16:30601415-30601459                           | NM_177632:1628          | Fam43a        | INSIDE                 | 0.968                                                        | 1.593                          | 696.07             | 1109.15            | 1.542                          | 591.69             | 912.32             |
| A_68_P32026433 | chr19:24974465-24974509                           | NM_008022:1313          | Foxd4         | INSIDE                 | 0.968                                                        | 0.614                          | 2497.57            | 1532.41            | 0.594                          | 2040.07            | 1212.09            |
| A_68_P24674234 | chr6:97567426-97567470                            | NM_145148:203           | Frmf4b        | INSIDE                 | 0.968                                                        | 1.614                          | 1134.36            | 1830.40            | 1.562                          | 960.93             | 1501.12            |
| A_68_P23417689 | chr4:151654150-151654194                          | NM_178406:5702          | Gpr153        | INSIDE                 | 0.968                                                        | 2.088                          | 484.12             | 1011.08            | 2.021                          | 413.55             | 835.63             |
| A_68_P31313936 | chr17:68046719-68046763                           | NM_008480:136           | Lama1         | INSIDE                 | 0.968                                                        | 2.073                          | 687.64             | 1425.35            | 2.007                          | 726.58             | 1458.48            |
| A_68_P25031177 | chr7:31140943-31140987                            | NM_175478:6827          | Lrfn3         | INSIDE                 | 0.968                                                        | 2.651                          | 681.89             | 1807.68            | 2.566                          | 563.90             | 1446.71            |
| A_68_P23326916 | chr4:134708430-134708475                          | NM_019732:31893         | Runx3         | INSIDE                 | 0.968                                                        | 3.717                          | 197.36             | 733.68             | 3.599                          | 176.25             | 634.34             |
| A_68_P21018171 | chr2:13715028-13715072                            | NM_145838:97            | St8sia6       | INSIDE                 | 0.968                                                        | 0.641                          | 2543.71            | 1630.95            | 0.620                          | 2023.22            | 1255.36            |
| A_68_P25959800 | chr8:74659745-74659789                            | NM_001001491:576        | Tpm4          | INSIDE                 | 0.968                                                        | 0.745                          | 4219.91            | 3142.70            | 0.721                          | 3224.85            | 2324.62            |
| A_68_P30363605 | chr15:78813442-78813487                           | NM_001024716:-21        | Triobp        | PROMOTER               | 0.968                                                        | 2.827                          | 243.95             | 689.73             | 2.737                          | 220.11             | 602.41             |
| A_68_P27365512 | chr10:94977939-94977984                           | NM_080560:166           | Ube2n         | INSIDE                 | 0.968                                                        | 2.585                          | 249.26             | 644.23             | 2.502                          | 214.67             | 537.14             |
| A_68_P24168282 | chr5:147197029-147197073                          | NM_145155:469           | Wasf3         | INSIDE                 | 0.968                                                        | 0.480                          | 2103.45            | 1008.98            | 0.464                          | 1741.66            | 808.88             |
| A_68_P25008271 | chr7:25866888-25866932                            | NM_175477:4646          | Zfp574        | INSIDE                 | 0.968                                                        | 1.565                          | 762.61             | 1193.64            | 1.516                          | 665.04             | 1008.12            |
| A_68_P32565627 | chrX:98989595-98989639                            | ENSMUST00000151231:-378 |               | DIVERGENT_PROMOTER     | 0.968                                                        | 4.679                          | 438.11             | 2050.04            | 4.528                          | 224.84             | 1017.97            |
| A_68_P27899786 | chr11:70068857-70068903                           | NM_007440:-37           | Alox12        | PROMOTER               | 0.967                                                        | 3.348                          | 1152.40            | 3858.56            | 3.238                          | 1063.01            | 3441.50            |
| A_68_P27503065 | chr10:120802501-120802545                         | NM_029364:377           | Gns           | INSIDE                 | 0.967                                                        | 1.927                          | 842.41             | 1623.03            | 1.863                          | 818.41             | 1524.87            |
| A_68_P27278589 | chr10:79197977-79198021                           | NM_008226:18620         | Hen2          | INSIDE                 | 0.967                                                        | 1.636                          | 723.89             | 1184.53            | 1.583                          | 647.23             | 1024.38            |
| A_68_P25599895 | chr7:150481208-150481262                          | NR_001461:1218          | Kcnq1ot1      | INSIDE                 | 0.967                                                        | 2.362                          | 3496.10            | 8256.61            | 2.284                          | 2538.78            | 5797.90            |
| A_68_P21816616 | chr2:163996879-163996923                          | NM_008435:-51           | Kens1         | PROMOTER               | 0.967                                                        | 1.663                          | 1066.31            | 1773.00            | 1.607                          | 941.67             | 1513.49            |
| A_68_P25951933 | chr8:72975932-72975976                            | NM_001122830:24888      | Klh26         | INSIDE                 | 0.967                                                        | 2.973                          | 391.33             | 1163.61            | 2.876                          | 331.47             | 953.16             |
| A_68_P26216538 | chr8:122394181-122394225                          | NM_146219:7998          | Klh36         | INSIDE                 | 0.967                                                        | 2.742                          | 396.15             | 1086.42            | 2.652                          | 320.98             | 851.10             |
| A_68_P27950594 | chr11:79524651-79524695                           | NR_029579:-798          | Mir193        | PROMOTER               | 0.967                                                        | 0.620                          | 2065.30            | 1280.80            | 0.600                          | 1682.46            | 1008.83            |
| A_68_P28055768 | chr11:98200119-98200163                           | NM_010895:-9181         | Neurod2       | DIVERGENT_PROMOTER     | 0.967                                                        | 0.422                          | 1482.50            | 625.98             | 0.408                          | 1382.24            | 564.18             |
| A_68_P29056694 | chr13:55828552-55828596                           | NM_028281:-154          | Pebd2         | PROMOTER               | 0.967                                                        | 3.181                          | 542.75             | 1726.57            | 3.078                          | 548.22             | 1687.25            |
| A_68_P24994416 | chr7:20214165-20214209                            | NM_009046:601           | Relb          | INSIDE                 | 0.967                                                        | 2.034                          | 1502.25            | 3055.02            | 1.967                          | 1131.46            | 2226.11            |
| A_68_P24950762 | chr7:4788423-4788469                              | NM_172737:7852          | Shisa7        | INSIDE                 | 0.967                                                        | 3.937                          | 2138.58            | 8419.16            | 3.806                          | 1674.67            | 6373.12            |
| A_68_P26849143 | chr9:115218715-115218759                          | NM_024222:803           | St3b          | INSIDE                 | 0.967                                                        | 1.821                          | 859.50             | 1565.13            | 1.761                          | 790.59             | 1392.07            |

| ProbeName      | Target position of probe on CpG island microarray | TargetID                | GeneSymbol    | CpG island Description | Ratio of relative methylation (TiO <sub>2</sub> -NP/Vehicle) | Sham group                     |                    |                    | TiO <sub>2</sub> -H group      |                    |                    |
|----------------|---------------------------------------------------|-------------------------|---------------|------------------------|--------------------------------------------------------------|--------------------------------|--------------------|--------------------|--------------------------------|--------------------|--------------------|
|                |                                                   |                         |               |                        |                                                              | Relative methylation (Cy5/Cy3) | Cy3 signal (Input) | Cy5 signal (MeDIP) | Relative methylation (Cy5/Cy3) | Cy3 signal (Input) | Cy5 signal (MeDIP) |
| A_68_P23331726 | chr4:135577649-135577693                          | NM_013736:-106          | Tceb3         | PROMOTER               | 0.967                                                        | 1.640                          | 2011.60            | 3299.36            | 1.587                          | 1605.53            | 2547.20            |
| A_68_P26323063 | chr9:15297918-15297962                            | AK146267:65             |               | INSIDE                 | 0.967                                                        | 2.930                          | 319.57             | 936.38             | 2.833                          | 315.23             | 893.07             |
| A_68_P21326874 | chr2:72472122-72472166                            | ENSMUST00000120282:152  |               | INSIDE                 | 0.967                                                        | 2.729                          | 563.77             | 1538.69            | 2.638                          | 482.34             | 1272.48            |
| A_68_P30665798 | chr16:34745356-34745400                           | ENSMUST00000158268:83   |               | INSIDE                 | 0.967                                                        | 2.005                          | 1256.21            | 2518.85            | 1.938                          | 1092.85            | 2118.02            |
| A_68_P21774856 | chr2:156866097-156866141                          | NM_001164663:38883      | 9830001H06Rik | INSIDE                 | 0.966                                                        | 2.841                          | 512.26             | 1455.22            | 2.745                          | 425.38             | 1167.58            |
| A_68_P23320879 | chr4:133628861-133628905                          | NM_001162970:4516       | Aim1l         | INSIDE                 | 0.966                                                        | 1.869                          | 858.03             | 1603.98            | 1.806                          | 718.83             | 1297.94            |
| A_68_P32533284 | chrX:90544387-90544431                            | NM_007492:12424         | Arx           | DOWNSTREAM             | 0.966                                                        | 1.941                          | 861.31             | 1671.88            | 1.874                          | 610.59             | 1144.38            |
| A_68_P27173579 | chr10:59766022-59766066                           | NM_023370:393194        | Cdh23         | INSIDE                 | 0.966                                                        | 2.433                          | 773.97             | 1883.27            | 2.351                          | 600.60             | 1412.11            |
| A_68_P25020922 | chr7:29062595-29062639                            | NM_001177427:-108       | Eid2b         | PROMOTER               | 0.966                                                        | 1.803                          | 848.63             | 1530.30            | 1.742                          | 688.20             | 1198.81            |
| A_68_P24003588 | chr5:114830147-114830191                          | NM_001159941:346        | Kctd10        | INSIDE                 | 0.966                                                        | 2.081                          | 10672.79           | 22213.64           | 2.011                          | 6353.84            | 12779.78           |
| A_68_P31922935 | chr19:4397029-4397073                             | NM_001001984:27         | Kdm2a         | INSIDE                 | 0.966                                                        | 1.675                          | 8529.86            | 14284.03           | 1.618                          | 5892.29            | 9532.24            |
| A_68_P31601517 | chr18:32322542-32322586                           | NM_011946:-178          | Map3k2        | PROMOTER               | 0.966                                                        | 1.986                          | 334.24             | 663.95             | 1.918                          | 394.56             | 756.93             |
| A_68_P24990477 | chr7:19511769-19511813                            | NM_001029877:554        | Nova2         | INSIDE                 | 0.966                                                        | 1.589                          | 2661.36            | 4228.37            | 1.535                          | 1824.74            | 2800.68            |
| A_68_P27181450 | chr10:61088648-61088692                           | NM_001177511:30439      | Npffr1        | INSIDE                 | 0.966                                                        | 0.577                          | 1670.78            | 964.19             | 0.557                          | 1354.64            | 755.13             |
| A_68_P25953724 | chr8:73267060-73267104                            | NM_201607:19120         | Pde4c         | INSIDE                 | 0.966                                                        | 2.033                          | 643.26             | 1307.89            | 1.965                          | 544.13             | 1069.02            |
| A_68_P22522615 | chr3:129581952-129581996                          | NM_183423:-2127         | Pla2g12a      | PROMOTER               | 0.966                                                        | 7.610                          | 7942.28            | 60438.52           | 7.351                          | 4845.14            | 35618.85           |
| A_68_P23430799 | chr4:153715942-153715986                          | NM_001177995:295018     | Prdm16        | INSIDE                 | 0.966                                                        | 5.873                          | 4321.20            | 25379.65           | 5.673                          | 3110.20            | 17644.01           |
| A_68_P31256001 | chr17:56562089-56562133                           | NM_011218:53793         | Ptprs         | INSIDE                 | 0.966                                                        | 1.883                          | 390.47             | 735.39             | 1.819                          | 354.17             | 644.21             |
| A_68_P22523680 | chr3:129763666-129763711                          | NM_207209:137           | Sec24b        | INSIDE                 | 0.966                                                        | 0.599                          | 2451.45            | 1468.27            | 0.578                          | 2098.65            | 1213.61            |
| A_68_P32203282 | chr19:56901047-56901091                           | NM_001002241:-4133      | Tdrd1         | PROMOTER               | 0.966                                                        | 2.627                          | 1661.33            | 4363.70            | 2.538                          | 1401.68            | 3557.37            |
| A_68_P29049666 | chr13:54569805-54569849                           | NM_028597:375           | Thoc3         | INSIDE                 | 0.966                                                        | 3.584                          | 11387.77           | 40816.57           | 3.462                          | 7150.73            | 24752.26           |
| A_68_P32700063 | chrX:137133904-137133948                          | NM_001077364:1135       | Tsc22d3       | INSIDE                 | 0.966                                                        | 3.058                          | 458.56             | 1402.22            | 2.954                          | 315.96             | 933.49             |
| A_68_P21931967 | chr3:8327343-8327387                              |                         |               | Unknown                | 0.966                                                        | 3.401                          | 1379.32            | 4691.57            | 3.287                          | 1266.35            | 4162.24            |
| A_68_P24944609 | chr6:149310012-149310056                          | ENSMUST00000120260:-173 |               | DIVERGENT_PROMOTER     | 0.966                                                        | 2.507                          | 614.97             | 1541.84            | 2.423                          | 559.63             | 1355.90            |
| A_68_P28184669 | chr11:120319314-120319358                         | NM_025560:41            | 1810049H13Rik | INSIDE                 | 0.965                                                        | 1.683                          | 696.59             | 1172.54            | 1.625                          | 646.08             | 1049.91            |
| A_68_P20412921 | chr1:88483574-88483618                            | NM_172974:-78           | Cops7b        | DIVERGENT_PROMOTER     | 0.965                                                        | 1.634                          | 769.01             | 1256.72            | 1.578                          | 612.63             | 966.60             |
| A_68_P32467036 | chrX:71491383-71491427                            | NM_010227:469           | Flna          | INSIDE                 | 0.965                                                        | 1.705                          | 3377.47            | 5757.93            | 1.645                          | 1360.61            | 2238.20            |
| A_68_P22661983 | chr3:153991849-153991908                          | NM_010713:1646          | Lhx8          | INSIDE                 | 0.965                                                        | 2.132                          | 1134.10            | 2418.22            | 2.057                          | 981.86             | 2019.46            |
| A_68_P23955549 | chr5:105910183-105910227                          | NM_001033550:65411      | Lrre8b        | INSIDE                 | 0.965                                                        | 2.192                          | 617.55             | 1353.45            | 2.116                          | 554.46             | 1173.09            |
| A_68_P24946818 | chr7:3637479-3637523                              | NM_029934:7627          | Mboat7        | INSIDE                 | 0.965                                                        | 3.062                          | 1927.97            | 5902.77            | 2.955                          | 1574.12            | 4651.46            |
| A_68_P27843267 | chr11:60290696-60290740                           | NM_001103171:7878       | Myo15         | INSIDE                 | 0.965                                                        | 1.793                          | 1689.47            | 3029.45            | 1.731                          | 1177.08            | 2036.99            |
| A_68_P29237614 | chr13:95655500-95655544                           | NM_011021:9941          | Otp           | DOWNSTREAM             | 0.965                                                        | 2.514                          | 220.86             | 555.15             | 2.426                          | 219.41             | 532.18             |
| A_68_P26492040 | chr9:48288627-48288671                            | NM_024233:68            | Rexo2         | INSIDE                 | 0.965                                                        | 0.662                          | 3589.28            | 2375.05            | 0.639                          | 3021.85            | 1929.84            |
| A_68_P32415805 | chrX:58146252-58146296                            | NM_009237:331           | Sox3          | INSIDE                 | 0.965                                                        | 2.384                          | 899.27             | 2143.43            | 2.300                          | 498.80             | 1147.02            |
| A_68_P23416139 | chr4:151406623-151406667                          | NM_031867:5955          | Tas1r1        | INSIDE                 | 0.965                                                        | 2.616                          | 2348.04            | 6143.61            | 2.526                          | 1773.68            | 4479.83            |
| A_68_P27943938 | chr11:78349603-78349647                           | NM_001159392:138        | Tnfrsf1       | INSIDE                 | 0.965                                                        | 0.517                          | 1417.60            | 733.32             | 0.499                          | 1037.53            | 517.97             |
| A_68_P24002087 | chr5:114580701-114580745                          | NM_011677:-442          | Ung           | PROMOTER               | 0.965                                                        | 0.327                          | 1848.49            | 603.84             | 0.315                          | 1538.96            | 485.30             |
| A_68_P30511262 | chr16:4640285-4640329                             | NM_139307:362           | Vasn          | INSIDE                 | 0.965                                                        | 0.597                          | 1099.81            | 656.89             | 0.576                          | 985.82             | 568.05             |
| A_68_P29390921 | chr14:9498720-9498764                             | NM_028934:62            | 4930452B06Rik | INSIDE                 | 0.964                                                        | 0.733                          | 2147.08            | 1574.57            | 0.707                          | 1850.66            | 1308.08            |
| A_68_P23293013 | chr4:12844472-12844516                            | NM_001009819:7993       | A3gal2        | INSIDE                 | 0.964                                                        | 1.601                          | 921.37             | 1475.32            | 1.543                          | 656.77             | 1013.69            |
| A_68_P22482405 | chr3:122123152-122123204                          | NM_013867:481           | Bear3         | INSIDE                 | 0.964                                                        | 3.352                          | 284.01             | 951.99             | 3.231                          | 218.22             | 705.12             |
| A_68_P23574101 | chr5:31013677-31013721                            | NM_023047:-569          | Dpysl5        | PROMOTER               | 0.964                                                        | 2.119                          | 640.71             | 1357.36            | 2.042                          | 550.25             | 1123.69            |
| A_68_P27143973 | chr10:53471309-53471353                           | NM_001081428:-615       | Fam184a       | PROMOTER               | 0.964                                                        | 0.752                          | 6136.58            | 4614.28            | 0.725                          | 4835.20            | 3505.87            |
| A_68_P28940416 | chr13:34839156-34839200                           | NM_138746:7668          | Fam50b        | INSIDE                 | 0.964                                                        | 2.220                          | 1030.54            | 2287.50            | 2.140                          | 843.92             | 1805.91            |
| A_68_P26658191 | chr9:77961162-77961206                            | NM_019987:140           | Ick           | INSIDE                 | 0.964                                                        | 0.562                          | 2159.68            | 1214.59            | 0.542                          | 1848.77            | 1002.06            |
| A_68_P33012165 | chr9_random:55589-55633                           | NM_011154:-578          | Ppp2r3d       | PROMOTER               | 0.964                                                        | 0.513                          | 1365.48            | 700.53             | 0.495                          | 1157.80            | 572.79             |
| A_68_P20412584 | chr1:88421724-88421768                            | NM_008972:-1564         | Ptma          | PROMOTER               | 0.964                                                        | 0.590                          | 1192.90            | 703.68             | 0.569                          | 943.08             | 536.36             |
| A_68_P23308588 | chr4:131393415-131393459                          | NM_001083119:757        | Ptpnu         | INSIDE                 | 0.964                                                        | 4.245                          | 16927.72           | 71856.67           | 4.093                          | 10362.62           | 42409.37           |
| A_68_P25025681 | chr7:29946628-29946672                            | NM_182927:7016          | Spred3        | INSIDE                 | 0.964                                                        | 2.362                          | 2182.95            | 5156.37            | 2.277                          | 1803.38            | 4105.54            |
| A_68_P23395335 | chr4:147966100-147966144                          | NM_009272:501           | Srm           | INSIDE                 | 0.964                                                        | 1.600                          | 1672.56            | 2676.41            | 1.543                          | 1587.41            | 2449.95            |
| A_68_P23608584 | chr5:36924656-36924700                            | NM_133910:368           | Tbc1d14       | INSIDE                 | 0.964                                                        | 1.411                          | 11401.18           | 16081.94           | 1.359                          | 7749.20            | 10534.57           |

| ProbeName      | Target position of probe on CpG island microarray | TargetID                 | GeneSymbol    | CpG island Description | Ratio of relative methylation (TiO <sub>2</sub> -NP/Vehicle) | Sham group                     |                    |                    | TiO <sub>2</sub> -H group      |                    |                    |
|----------------|---------------------------------------------------|--------------------------|---------------|------------------------|--------------------------------------------------------------|--------------------------------|--------------------|--------------------|--------------------------------|--------------------|--------------------|
|                |                                                   |                          |               |                        |                                                              | Relative methylation (Cy5/Cy3) | Cy3 signal (Input) | Cy5 signal (MeDIP) | Relative methylation (Cy5/Cy3) | Cy3 signal (Input) | Cy5 signal (MeDIP) |
| A_68_P31092363 | chr17:23694927-23694971                           | NM_001033496:6245        | Zfp213        | INSIDE                 | 0.964                                                        | 2.598                          | 1121.66            | 2913.77            | 2.505                          | 900.96             | 2256.49            |
| A_68_P21914376 | chr3:3309284-3309328                              |                          |               | Unknown                | 0.964                                                        | 3.811                          | 1027.34            | 3915.69            | 3.676                          | 868.98             | 3194.30            |
| A_68_P26403086 | chr9:31839692-31839736                            |                          |               | Unknown                | 0.964                                                        | 0.617                          | 1749.03            | 1079.72            | 0.595                          | 1490.88            | 887.49             |
| A_68_P26017564 | chr8:86525774-86525820                            | NM_183097:192            | 1700067K01Rik | INSIDE                 | 0.963                                                        | 1.930                          | 332.98             | 642.60             | 1.859                          | 320.28             | 595.36             |
| A_68_P22314994 | chr3:88448009-88448053                            | NM_001198912:22715       | Arhgef2       | INSIDE                 | 0.963                                                        | 2.591                          | 883.10             | 2288.09            | 2.494                          | 829.48             | 2069.13            |
| A_68_P28788966 | chr13:3610442-3610486                             | NM_134063:-110           | BC016423      | PROMOTER               | 0.963                                                        | 2.094                          | 1375.50            | 2880.73            | 2.017                          | 1151.33            | 2322.70            |
| A_68_P24055363 | chr5:123823490-123823534                          | NM_029850:29056          | Bel7a         | INSIDE                 | 0.963                                                        | 2.687                          | 2360.30            | 6341.13            | 2.586                          | 1809.47            | 4679.46            |
| A_68_P26055369 | chr8:93352945-93352989                            | NM_177224:233            | Chd9          | INSIDE                 | 0.963                                                        | 1.857                          | 723.30             | 1342.95            | 1.788                          | 650.44             | 1163.16            |
| A_68_P26349278 | chr9:21656710-21656754                            | NM_177030:347            | Dock6         | INSIDE                 | 0.963                                                        | 2.223                          | 462.16             | 1027.19            | 2.140                          | 412.57             | 883.05             |
| A_68_P32750744 | chrX:149216782-149216826                          | NM_010951:341            | Gpr143        | INSIDE                 | 0.963                                                        | 1.507                          | 1631.26            | 2457.98            | 1.452                          | 937.50             | 1360.83            |
| A_68_P29589396 | chr14:49286130-49286176                           | NR_029384:-2810          | Otx2os1       | DIVERGENT_PROMOTER     | 0.963                                                        | 3.952                          | 186.22             | 735.89             | 3.805                          | 161.62             | 615.03             |
| A_68_P24898887 | chr6:141198621-141198665                          | NM_018779:853            | Pde3a         | INSIDE                 | 0.963                                                        | 1.821                          | 1527.37            | 2781.61            | 1.753                          | 1246.35            | 2185.34            |
| A_68_P31127303 | chr17:29459319-29459363                           | NM_023734:3514           | Pil6          | INSIDE                 | 0.963                                                        | 3.564                          | 6569.63            | 23416.27           | 3.433                          | 4080.06            | 14007.31           |
| A_68_P29701213 | chr14:70828758-70828802                           | NM_021308:121            | Piwil2        | INSIDE                 | 0.963                                                        | 1.752                          | 1106.00            | 1937.24            | 1.687                          | 844.62             | 1424.66            |
| A_68_P24424178 | chr6:47601643-47601687                            | NR_002841:3429           | Rn4.5s        | DOWNSTREAM             | 0.963                                                        | 1.971                          | 5917.35            | 11664.09           | 1.899                          | 5060.23            | 9607.70            |
| A_68_P30489330 | chr15:10088451-100884595                          | NM_011323:117871         | Scn8a         | DOWNSTREAM             | 0.963                                                        | 1.855                          | 882.90             | 1637.64            | 1.786                          | 764.43             | 1365.66            |
| A_68_P27911312 | chr11:72224674-72224718                           | NM_177776:519            | Smtnl2        | INSIDE                 | 0.963                                                        | 1.476                          | 5700.32            | 8414.10            | 1.421                          | 4051.52            | 5758.33            |
| A_68_P22386748 | chr3:103380204-103380248                          | NM_018800:1023           | Syt6          | INSIDE                 | 0.963                                                        | 2.268                          | 1445.24            | 3277.60            | 2.184                          | 1339.00            | 2924.00            |
| A_68_P30370355 | chr15:79963981-79964036                           | NM_025609:425            | Tab1          | INSIDE                 | 0.963                                                        | 1.930                          | 1201.95            | 2319.81            | 1.859                          | 863.31             | 1604.63            |
| A_68_P32203280 | chr19:56900735-56900779                           | NM_001002240:-8          | Tdrd1         | PROMOTER               | 0.963                                                        | 2.616                          | 829.11             | 2169.16            | 2.520                          | 640.53             | 1614.19            |
| A_68_P26082679 | chr8:97852246-97852290                            | NM_024467:3582           | Zfp319        | INSIDE                 | 0.963                                                        | 1.545                          | 1141.63            | 1763.91            | 1.488                          | 943.23             | 1403.44            |
| A_68_P33007655 | A_68_P33007655                                    |                          |               | Unknown                | 0.963                                                        | 1.687                          | 3501.59            | 5908.89            | 1.625                          | 3706.54            | 6023.41            |
| A_68_P29018252 | chr13:48323302-48323346                           | ENSMUST00000143259:34668 |               | INSIDE                 | 0.963                                                        | 0.456                          | 1506.78            | 686.38             | 0.439                          | 1250.98            | 548.78             |
| A_68_P27100725 | chr10:43230190-43230234                           | NM_199028:31267          | Bend3         | INSIDE                 | 0.962                                                        | 1.880                          | 643.01             | 1208.91            | 1.810                          | 472.27             | 854.59             |
| A_68_P20528694 | chr1:113761142-113761186                          | NM_001081316:331         | Dsel          | INSIDE                 | 0.962                                                        | 2.025                          | 607.10             | 1229.49            | 1.949                          | 594.41             | 1158.61            |
| A_68_P24620357 | chr6:88148628-88148672                            | NM_008090:-7             | Gata2         | PROMOTER               | 0.962                                                        | 1.839                          | 1623.52            | 2985.55            | 1.768                          | 1387.12            | 2452.93            |
| A_68_P21874751 | chr2:174154053-174154097                          | NM_001077510:-1515       | Gnas          | PROMOTER               | 0.962                                                        | 2.056                          | 634.46             | 1304.31            | 1.978                          | 668.48             | 1322.40            |
| A_68_P24159777 | chr5:144934590-144934634                          | NM_001081109:73308       | Lmtk2         | INSIDE                 | 0.962                                                        | 2.531                          | 1229.86            | 3112.97            | 2.436                          | 1028.45            | 2505.18            |
| A_68_P21102108 | chr2:30111813-30111859                            | NM_177725:18548          | Lrre8a        | INSIDE                 | 0.962                                                        | 2.719                          | 527.34             | 1433.95            | 2.617                          | 456.35             | 1194.17            |
| A_68_P30961946 | chr16:91270379-91270423                           | NM_016968:387            | Olig1         | INSIDE                 | 0.962                                                        | 2.180                          | 3404.57            | 7422.90            | 2.098                          | 2602.93            | 5462.02            |
| A_68_P20474071 | chr1:99873584-99873628                            | NM_013626:118603         | Pam           | INSIDE                 | 0.962                                                        | 1.860                          | 588.27             | 1094.41            | 1.790                          | 514.69             | 921.12             |
| A_68_P32114752 | chr19:41450572-41450616                           | NM_031376:8966           | Pik3ap1       | INSIDE                 | 0.962                                                        | 1.895                          | 907.28             | 1719.06            | 1.823                          | 776.69             | 1415.58            |
| A_68_P23271481 | chr4:124664358-124664402                          | NM_138683:707            | Rspo1         | INSIDE                 | 0.962                                                        | 0.580                          | 1089.79            | 632.44             | 0.558                          | 934.84             | 522.03             |
| A_68_P31123428 | chr17:28758772-28758816                           | NM_016795:605            | Srpkl         | INSIDE                 | 0.962                                                        | 0.704                          | 2057.92            | 1448.38            | 0.677                          | 1632.02            | 1104.51            |
| A_68_P25971567 | chr8:77558116-77558160                            | NM_001136259:554         | Tom1          | INSIDE                 | 0.962                                                        | 0.608                          | 1510.12            | 918.48             | 0.585                          | 1209.47            | 707.74             |
| A_68_P21875504 | chr2:174282882-174282926                          | NM_001080971:6709        | Tubb1         | INSIDE                 | 0.962                                                        | 3.783                          | 1344.89            | 5087.13            | 3.640                          | 1020.41            | 3714.05            |
| A_68_P31301685 | chr17:65962800-65962844                           | NM_013933:73             | Vapa          | INSIDE                 | 0.962                                                        | 0.710                          | 1375.96            | 977.26             | 0.683                          | 1181.22            | 807.34             |
| A_68_P28599174 | chr12:85930850-85930894                           | NM_007701:20071          | Vsx2          | INSIDE                 | 0.962                                                        | 1.642                          | 528.35             | 867.58             | 1.579                          | 757.69             | 1196.38            |
| A_68_P24424841 | chr6:47855192-47855236                            | NM_146175:27661          | Zfp282        | INSIDE                 | 0.962                                                        | 1.687                          | 1379.08            | 2326.54            | 1.623                          | 1051.04            | 1706.17            |
| A_68_P31219171 | chr17:48925588-48925633                           |                          |               | Unknown                | 0.962                                                        | 1.856                          | 595.33             | 1105.13            | 1.785                          | 492.10             | 878.55             |
| A_68_P24761357 | chr6:113705166-113705210                          | NM_001036684:136182      | Atp2b2        | INSIDE                 | 0.961                                                        | 2.519                          | 525.97             | 1324.93            | 2.420                          | 444.96             | 1076.97            |
| A_68_P25272114 | chr7:88600003-88600048                            | NM_007755:-463           | Cpeb1         | PROMOTER               | 0.961                                                        | 2.508                          | 992.10             | 2488.33            | 2.411                          | 823.50             | 1985.70            |
| A_68_P21082466 | chr2:26968285-26968329                            | NM_175427:29691          | Fam163b       | INSIDE                 | 0.961                                                        | 3.705                          | 5130.49            | 19006.68           | 3.560                          | 3391.22            | 12072.19           |
| A_68_P21621960 | chr2:128718146-128718190                          | NM_024237:28501          | Fbln7         | INSIDE                 | 0.961                                                        | 1.719                          | 1152.19            | 1981.03            | 1.653                          | 1082.09            | 1788.55            |
| A_68_P21122756 | chr2:33495852-33495899                            | NM_010725:156            | Lmx1b         | INSIDE                 | 0.961                                                        | 2.376                          | 896.77             | 2130.85            | 2.284                          | 673.54             | 1538.17            |
| A_68_P25021325 | chr7:29135852-29135896                            | NR_028129:-684           | LOC100302567  | PROMOTER               | 0.961                                                        | 1.620                          | 1713.15            | 2775.30            | 1.556                          | 1245.43            | 1938.27            |
| A_68_P28554434 | chr12:77634454-77634498                           | NM_153804:-70            | Plekhg3       | PROMOTER               | 0.961                                                        | 0.643                          | 1525.63            | 980.27             | 0.617                          | 1359.06            | 839.04             |
| A_68_P30447392 | chr15:93349977-93350021                           | NM_001033217:76324       | Prickle1      | INSIDE                 | 0.961                                                        | 3.097                          | 1119.09            | 3465.84            | 2.975                          | 1056.04            | 3141.88            |
| A_68_P21227529 | chr2:53937298-53937342                            | NM_023396:643            | Rprm          | INSIDE                 | 0.961                                                        | 1.937                          | 1088.69            | 2108.54            | 1.862                          | 991.20             | 1845.20            |
| A_68_P28291143 | chr12:25392901-25392945                           | NM_009104:-196           | Rrm2          | PROMOTER               | 0.961                                                        | 0.648                          | 4211.50            | 2730.99            | 0.623                          | 3364.06            | 2096.64            |
| A_68_P28469854 | chr12:60112791-60112835                           | NM_009147:192            | Sec23a        | INSIDE                 | 0.961                                                        | 0.346                          | 1613.18            | 558.72             | 0.333                          | 1264.54            | 420.80             |

| ProbeName      | Target position of probe on CpG island microarray | TargetID                | GeneSymbol    | CpG island Description | Ratio of relative methylation (TiO <sub>2</sub> -NP/Vehicle) | Sham group                     |                    |                    | TiO <sub>2</sub> -H group      |                    |                    |
|----------------|---------------------------------------------------|-------------------------|---------------|------------------------|--------------------------------------------------------------|--------------------------------|--------------------|--------------------|--------------------------------|--------------------|--------------------|
|                |                                                   |                         |               |                        |                                                              | Relative methylation (Cy5/Cy3) | Cy3 signal (Input) | Cy5 signal (MeDIP) | Relative methylation (Cy5/Cy3) | Cy3 signal (Input) | Cy5 signal (MeDIP) |
| A_68_P26752042 | chr9:97266348-97266392                            | NM_030219:4007          | Trim42        | INSIDE                 | 0.961                                                        | 2.286                          | 1445.52            | 3304.90            | 2.197                          | 1218.61            | 2677.25            |
| A_68_P22485525 | chr3:122687267-122687311                          | NM_133857:77            | Usp53         | INSIDE                 | 0.961                                                        | 0.525                          | 2546.71            | 1336.85            | 0.504                          | 1892.18            | 954.49             |
| A_68_P26494144 | A_68_P26494144                                    |                         |               | Unknown                | 0.961                                                        | 2.117                          | 1431.31            | 3029.98            | 2.034                          | 1248.77            | 2540.55            |
| A_68_P28175548 | chr11:118914534-118914580                         |                         |               | Unknown                | 0.961                                                        | 1.700                          | 648.78             | 1103.06            | 1.633                          | 538.68             | 879.74             |
| A_68_P23523567 | chr5:20457129-20457173                            | NR_030699:344           | A630072M18Rik | INSIDE                 | 0.960                                                        | 2.090                          | 944.95             | 1974.83            | 2.007                          | 815.25             | 1636.07            |
| A_68_P24617814 | chr6:87681107-87681152                            | NM_001159697:267        | Ccdc48        | INSIDE                 | 0.960                                                        | 1.855                          | 826.58             | 1533.44            | 1.782                          | 719.54             | 1281.91            |
| A_68_P27172913 | chr10:59648822-59648866                           | NM_016803:33164         | Chst3         | INSIDE                 | 0.960                                                        | 2.228                          | 451.05             | 1004.98            | 2.139                          | 347.59             | 743.61             |
| A_68_P26221740 | chr8:123192627-123192671                          | NM_009941:459           | Cox4i1        | INSIDE                 | 0.960                                                        | 0.620                          | 1248.33            | 774.28             | 0.596                          | 962.51             | 573.36             |
| A_68_P24193750 | chr5:151755531-151755575                          | NM_013823:371           | Kl            | INSIDE                 | 0.960                                                        | 0.401                          | 1398.75            | 560.46             | 0.385                          | 1214.61            | 467.10             |
| A_68_P27270908 | chr10:77365226-77365270                           | NM_145152:33            | Lrrc3         | INSIDE                 | 0.960                                                        | 1.586                          | 5274.44            | 8363.88            | 1.522                          | 3710.46            | 5647.16            |
| A_68_P21127263 | chr2:34226980-34227024                            | NM_016768:554           | Pbx3          | INSIDE                 | 0.960                                                        | 0.667                          | 1242.41            | 828.21             | 0.640                          | 1096.85            | 701.82             |
| A_68_P31207974 | chr17:46766268-46766312                           | NM_175168:163           | Ptk7          | INSIDE                 | 0.960                                                        | 0.658                          | 1815.69            | 1195.39            | 0.632                          | 1476.68            | 932.97             |
| A_68_P20370953 | chr1:78306980-78307024                            | NM_001004173:82         | Sgpp2         | INSIDE                 | 0.960                                                        | 0.643                          | 1754.94            | 1128.30            | 0.617                          | 1602.42            | 989.17             |
| A_68_P28176530 | chr11:119072055-119072099                         | NM_172443:17737         | Tbc1d16       | INSIDE                 | 0.960                                                        | 18.837                         | 1910.68            | 35990.56           | 18.076                         | 1455.53            | 26310.09           |
| A_68_P27965916 | chr11:82200818-82200862                           | NM_023438:-1561         | Tmem132e      | PROMOTER               | 0.960                                                        | 0.512                          | 1179.51            | 604.47             | 0.492                          | 1055.62            | 519.23             |
| A_68_P26247306 | chr8:127245477-127245521                          | NM_145607:377           | Tie13         | INSIDE                 | 0.960                                                        | 0.634                          | 1928.51            | 1221.94            | 0.608                          | 1659.64            | 1009.76            |
| A_68_P23424872 | chr4:152806992-152807036                          | NM_001099299:49925      | Ajap1         | INSIDE                 | 0.959                                                        | 2.196                          | 1927.70            | 4232.39            | 2.106                          | 1556.44            | 3277.19            |
| A_68_P27298384 | chr10:83111351-83111395                           | NM_145220:37            | Appl2         | INSIDE                 | 0.959                                                        | 0.551                          | 1183.75            | 652.63             | 0.529                          | 955.54             | 505.35             |
| A_68_P29338035 | chr13:11377889-11377933                           | NM_001081062:-99        | Ceno          | PROMOTER               | 0.959                                                        | 1.858                          | 648.69             | 1205.01            | 1.781                          | 623.25             | 1109.76            |
| A_68_P33015621 | chr1_random:50610-50662                           | NM_026866:134702        | Disp1         | INSIDE                 | 0.959                                                        | 2.720                          | 779.42             | 2120.03            | 2.607                          | 615.67             | 1605.19            |
| A_68_P25006992 | chr7:25654882-25654927                            | NM_027732:-171          | Dmrte2        | DIVERGENT_PROMOTER     | 0.959                                                        | 2.247                          | 829.70             | 1864.04            | 2.155                          | 625.27             | 1347.61            |
| A_68_P23335794 | chr4:136326887-136326931                          | NM_010142:64942         | Ephb2         | INSIDE                 | 0.959                                                        | 3.026                          | 2754.47            | 8334.68            | 2.901                          | 2143.54            | 6218.37            |
| A_68_P22293166 | chr3:84619656-84619700                            | NM_001177773:180        | Fbxw7         | INSIDE                 | 0.959                                                        | 0.621                          | 2197.02            | 1364.24            | 0.595                          | 1721.42            | 1025.02            |
| A_68_P24112566 | chr5:134790011-134790055                          | NM_001080746:584        | Gtf2i         | INSIDE                 | 0.959                                                        | 1.604                          | 864.13             | 1385.83            | 1.539                          | 782.29             | 1203.64            |
| A_68_P31113975 | chr17:27194456-27194500                           | NM_080553:230           | Itp3          | INSIDE                 | 0.959                                                        | 2.019                          | 400.59             | 808.86             | 1.937                          | 400.96             | 776.62             |
| A_68_P28547082 | chr12:76277823-76277867                           | NM_172805:475           | Kenh5         | INSIDE                 | 0.959                                                        | 4.953                          | 805.27             | 3988.38            | 4.751                          | 744.42             | 3536.76            |
| A_68_P26346082 | chr9:21038221-21038265                            | NM_001110305:5534       | Keap1         | INSIDE                 | 0.959                                                        | 2.452                          | 324.58             | 796.01             | 2.353                          | 286.58             | 674.21             |
| A_68_P27988569 | chr11:86171411-86171455                           | NM_001080931:-405       | Med13         | PROMOTER               | 0.959                                                        | 2.829                          | 566.59             | 1602.62            | 2.712                          | 538.16             | 1459.64            |
| A_68_P30422884 | chr15:88899097-88899141                           | NM_001002005:8963       | Panx2         | INSIDE                 | 0.959                                                        | 3.241                          | 2929.63            | 9493.74            | 3.108                          | 2032.62            | 6318.18            |
| A_68_P31868009 | chr18:81171208-81171252                           | NM_178280:12087         | Sall3         | INSIDE                 | 0.959                                                        | 2.177                          | 435.61             | 948.22             | 2.089                          | 400.11             | 835.66             |
| A_68_P27942518 | chr11:78114962-78115006                           | NM_017407:-108          | Spag5         | PROMOTER               | 0.959                                                        | 0.500                          | 1638.13            | 818.31             | 0.479                          | 1327.25            | 635.91             |
| A_68_P32114044 | chr19:41338030-41338074                           | NM_133352:442           | Tm9sf3        | INSIDE                 | 0.959                                                        | 1.935                          | 713.01             | 1379.85            | 1.856                          | 642.13             | 1191.85            |
| A_68_P25062054 | chr7:38352951-38352995                            | NM_172385:201799        | Zfp536        | INSIDE                 | 0.959                                                        | 2.206                          | 1504.60            | 3319.42            | 2.117                          | 1255.26            | 2656.78            |
| A_68_P33007021 | A_68_P33007021                                    |                         |               | Unknown                | 0.959                                                        | 1.848                          | 19506.44           | 36045.89           | 1.772                          | 15585.65           | 27618.44           |
| A_68_P26323069 | chr9:15298668-15298712                            | AK146267:815            |               | INSIDE                 | 0.959                                                        | 1.413                          | 2726.28            | 3853.27            | 1.356                          | 1913.02            | 2593.92            |
| A_68_P32288516 | chrX:20002305-20002349                            | ENSMUST00000115384:-487 |               | PROMOTER               | 0.959                                                        | 1.727                          | 690.49             | 1192.30            | 1.656                          | 481.95             | 797.99             |
| A_68_P22455157 | chr3:117278382-117278426                          | NM_029425:26            | 4833424015Rik | INSIDE                 | 0.958                                                        | 0.575                          | 1998.63            | 1148.34            | 0.551                          | 1726.16            | 950.40             |
| A_68_P32795516 | chrX:160347102-160347146                          | NM_026887:33            | Ap1s2         | INSIDE                 | 0.958                                                        | 1.975                          | 1139.31            | 2249.72            | 1.893                          | 776.14             | 1468.95            |
| A_68_P22338536 | chr3:94167827-94167871                            | NM_001136117:1483       | C2cd4d        | INSIDE                 | 0.958                                                        | 1.814                          | 834.22             | 1513.20            | 1.739                          | 827.50             | 1438.61            |
| A_68_P21070566 | chr2:25066778-25066822                            | NM_021393:209           | Cobra1        | INSIDE                 | 0.958                                                        | 1.451                          | 2238.87            | 3248.01            | 1.390                          | 1853.17            | 2576.21            |
| A_68_P28575259 | chr12:81440889-81440933                           | NM_177267:96678         | Deaf5         | INSIDE                 | 0.958                                                        | 2.806                          | 1783.02            | 5003.84            | 2.690                          | 1431.13            | 3849.20            |
| A_68_P28158193 | chr11:116099596-116099640                         | NM_025276:-213          | Evp1          | PROMOTER               | 0.958                                                        | 2.085                          | 877.97             | 1830.20            | 1.997                          | 809.10             | 1615.42            |
| A_68_P20294244 | chr1:64781733-64781777                            | NM_001042659:2570       | Fzd5          | INSIDE                 | 0.958                                                        | 4.143                          | 704.93             | 2920.67            | 3.969                          | 559.53             | 2220.89            |
| A_68_P21750610 | chr2:152512595-152512639                          | NM_025543:-267          | Mets2         | PROMOTER               | 0.958                                                        | 1.997                          | 2.084              | 1033.76            | 2.154                          | 2154.25            | 1741.04            |
| A_68_P27843266 | chr11:60290609-60290656                           | NM_001103171:7792       | Myo15         | INSIDE                 | 0.958                                                        | 2.232                          | 981.08             | 2189.87            | 2.137                          | 738.41             | 1578.32            |
| A_68_P28185382 | chr11:120434920-120434964                         | NM_011032:-692          | P4hb          | PROMOTER               | 0.958                                                        | 0.560                          | 954.84             | 534.66             | 0.536                          | 717.26             | 384.58             |
| A_68_P24117612 | chr5:136210056-136210100                          | NM_008898:44995         | Por           | INSIDE                 | 0.958                                                        | 2.450                          | 458.74             | 1123.78            | 2.346                          | 371.55             | 871.64             |
| A_68_P25728673 | chr8:26830531-26830575                            | NM_028000:33            | Ppapdc1b      | INSIDE                 | 0.958                                                        | 3.163                          | 1901.11            | 6013.56            | 3.031                          | 1711.61            | 5187.95            |
| A_68_P21817577 | chr2:164219124-164219168                          | NM_009036:-9547         | Rbpjl         | PROMOTER               | 0.958                                                        | 1.762                          | 479.37             | 844.54             | 1.688                          | 438.85             | 740.97             |
| A_68_P21750312 | chr2:152460407-152460451                          | NM_009047:7685          | Rem1          | INSIDE                 | 0.958                                                        | 2.295                          | 837.19             | 1921.38            | 2.199                          | 827.94             | 1820.40            |
| A_68_P26539387 | chr9:56775942-56775986                            | NM_175483:214           | Snx33         | INSIDE                 | 0.958                                                        | 0.526                          | 1225.75            | 644.99             | 0.504                          | 1010.84            | 509.51             |

| ProbeName      | Target position of probe on CpG island microarray | TargetID           | GeneSymbol    | CpG island Description | Ratio of relative methylation (TiO <sub>2</sub> -NP/Vehicle) | Sham group                     |                    |                    | TiO <sub>2</sub> -H group      |                    |                    |
|----------------|---------------------------------------------------|--------------------|---------------|------------------------|--------------------------------------------------------------|--------------------------------|--------------------|--------------------|--------------------------------|--------------------|--------------------|
|                |                                                   |                    |               |                        |                                                              | Relative methylation (Cy5/Cy3) | Cy3 signal (Input) | Cy5 signal (MeDIP) | Relative methylation (Cy5/Cy3) | Cy3 signal (Input) | Cy5 signal (MeDIP) |
| A_68_P30498346 | chr15:102348908-102348952                         | NM_009319:254      | Tarbp2        | INSIDE                 | 0.958                                                        | 1.938                          | 3148.64            | 6103.39            | 1.856                          | 2604.36            | 4834.94            |
| A_68_P23317934 | chr4:133053638-133053682                          | NM_001081156:805   | Trmp1         | INSIDE                 | 0.958                                                        | 1.567                          | 1644.13            | 2576.55            | 1.501                          | 1268.42            | 1903.77            |
| A_68_P29477492 | chr14:26279368-26279412                           | NM_183208:720      | Zmiz1         | INSIDE                 | 0.958                                                        | 0.534                          | 1044.11            | 557.57             | 0.512                          | 755.70             | 386.78             |
| A_68_P25357072 | chr7:105804387-105804431                          | NM_172280:671      | 2210018M11Rik | INSIDE                 | 0.957                                                        | 0.434                          | 1612.29            | 699.63             | 0.415                          | 1309.20            | 543.56             |
| A_68_P25730019 | chr8:27096869-27096915                            | NM_029037:7701     | 4930444A02Rik | INSIDE                 | 0.957                                                        | 3.339                          | 2049.67            | 6843.96            | 3.196                          | 1564.71            | 5001.28            |
| A_68_P24127312 | chr5:138182456-138182500                          | NM_175521:-1252    | 6430598A04Rik | DIVERGENT_PROMOTER     | 0.957                                                        | 2.453                          | 6825.66            | 16740.28           | 2.347                          | 4518.49            | 10605.07           |
| A_68_P28696863 | chr12:104563389-104563437                         | NM_023049:30799    | Asb2          | INSIDE                 | 0.957                                                        | 2.091                          | 465.93             | 974.27             | 2.000                          | 430.02             | 860.18             |
| A_68_P25047622 | chr7:35905690-35905734                            | NM_007678:1401     | Cebpa         | INSIDE                 | 0.957                                                        | 0.662                          | 1425.63            | 943.10             | 0.633                          | 1083.91            | 685.89             |
| A_68_P20884269 | chr1:183853674-183853718                          | NM_001083120:96415 | Enah          | INSIDE                 | 0.957                                                        | 1.579                          | 1538.17            | 2428.25            | 1.511                          | 1161.41            | 1754.80            |
| A_68_P20941838 | chr1:193960926-193960970                          | NR_033536:169      | Gm10516       | INSIDE                 | 0.957                                                        | 0.596                          | 1299.74            | 774.12             | 0.570                          | 1083.37            | 617.57             |
| A_68_P32119985 | chr19:42330579-42330623                           | NM_027694:372      | Golga7b       | INSIDE                 | 0.957                                                        | 1.869                          | 2309.86            | 4317.51            | 1.790                          | 1858.20            | 3325.41            |
| A_68_P29616393 | chr14:55732216-55732260                           | NM_177049:3534     | Jph4          | INSIDE                 | 0.957                                                        | 2.803                          | 686.73             | 1925.01            | 2.683                          | 683.02             | 1832.50            |
| A_68_P20864297 | chr1:180458955-180458999                          | NM_001161665:-279  | Kif26b        | PROMOTER               | 0.957                                                        | 1.631                          | 665.77             | 1086.07            | 1.561                          | 596.48             | 931.03             |
| A_68_P21071165 | chr2:25146200-25146244                            | NM_146117:792      | Lrcc26        | INSIDE                 | 0.957                                                        | 0.630                          | 1622.06            | 1022.20            | 0.603                          | 1199.75            | 723.67             |
| A_68_P22006136 | chr3:26230775-26230819                            | NM_138666:35       | Nlgn1         | INSIDE                 | 0.957                                                        | 0.672                          | 2414.71            | 1621.73            | 0.642                          | 1915.82            | 1230.87            |
| A_68_P30139533 | chr15:36539361-36539405                           | NM_008774:-654     | Pabpc1        | PROMOTER               | 0.957                                                        | 2.235                          | 744.22             | 1663.29            | 2.139                          | 709.18             | 1517.28            |
| A_68_P28957530 | chr13:38022811-38022855                           | NM_001177869:42093 | Rreb1         | INSIDE                 | 0.957                                                        | 1.650                          | 2230.16            | 3680.80            | 1.580                          | 1744.40            | 2756.46            |
| A_68_P30953522 | chr16:89885052-89885096                           | NM_009384:75998    | Tiam1         | INSIDE                 | 0.957                                                        | 2.368                          | 1041.42            | 2466.41            | 2.266                          | 930.20             | 2107.46            |
| A_68_P24974196 | chr7:13610514-13610558                            | NM_011588:1036     | Trim28        | INSIDE                 | 0.957                                                        | 1.517                          | 1684.95            | 2555.76            | 1.452                          | 1209.98            | 1757.00            |
| A_68_P31119041 | chr17:28024335-28024379                           | NM_001080769:30905 | Uhrf1bpl1     | INSIDE                 | 0.957                                                        | 3.042                          | 909.15             | 2765.72            | 2.913                          | 785.87             | 2289.00            |
| A_68_P32241860 | chrX:7706225-7706269                              | NR_029428:3727     | Wdr13         | INSIDE                 | 0.957                                                        | 3.661                          | 1399.37            | 5123.30            | 3.502                          | 630.03             | 2206.64            |
| A_68_P25029972 | chr7:30906920-30906964                            | NM_001081007:-24   | Zfp382        | PROMOTER               | 0.957                                                        | 1.598                          | 936.59             | 1496.75            | 1.529                          | 802.25             | 1226.46            |
| A_68_P25506496 | chr7:134754584-134754628                          | NM_177226:3341     | Zfp629        | INSIDE                 | 0.957                                                        | 2.684                          | 517.66             | 1389.16            | 2.568                          | 466.53             | 1198.11            |
| A_68_P30959217 | chr16:90830454-90830498                           | NM_001199210:-627  | 4931408A02Rik | PROMOTER               | 0.956                                                        | 1.735                          | 2441.84            | 4235.63            | 1.659                          | 1940.22            | 3218.64            |
| A_68_P22831245 | chr4:34498019-34498063                            | NM_001007589:177   | Akirin2       | INSIDE                 | 0.956                                                        | 2.089                          | 599.92             | 1253.27            | 1.997                          | 582.67             | 1163.50            |
| A_68_P26813123 | chr9:108017642-108017686                          | NM_007567:75050    | Bsn           | INSIDE                 | 0.956                                                        | 3.257                          | 2356.65            | 7676.63            | 3.114                          | 1652.23            | 5145.64            |
| A_68_P27565934 | chr11:5872237-5872281                             | NM_001174053:93493 | Camk2b        | INSIDE                 | 0.956                                                        | 1.725                          | 1149.19            | 1982.17            | 1.649                          | 892.23             | 1471.31            |
| A_68_P25186368 | chr7:73253968-73254012                            | NM_001081163:-410  | Chsy1         | PROMOTER               | 0.956                                                        | 1.555                          | 1168.42            | 1816.54            | 1.487                          | 970.19             | 1442.53            |
| A_68_P31951462 | chr19:10651912-10651957                           | NM_201351:-278     | Cybas3        | DIVERGENT_PROMOTER     | 0.956                                                        | 0.607                          | 969.01             | 588.52             | 0.580                          | 831.83             | 482.73             |
| A_68_P23366443 | chr4:141430949-141430993                          | NM_025994:-135     | Efh2          | PROMOTER               | 0.956                                                        | 2.508                          | 640.76             | 1606.84            | 2.397                          | 569.55             | 1365.24            |
| A_68_P21229088 | chr2:54288519-54288563                            | NM_173030:-257     | Galnt13       | PROMOTER               | 0.956                                                        | 0.722                          | 1814.71            | 1311.03            | 0.691                          | 1669.13            | 1153.38            |
| A_68_P27290411 | chr10:81007514-81007558                           | NM_010301:255      | Gna11         | INSIDE                 | 0.956                                                        | 2.305                          | 2034.66            | 4690.58            | 2.204                          | 1745.69            | 3846.83            |
| A_68_P22344500 | chr3:95363378-95363422                            | NM_026489:-198     | Hormad1       | PROMOTER               | 0.956                                                        | 1.949                          | 602.46             | 1174.31            | 1.864                          | 522.17             | 973.35             |
| A_68_P32537944 | chrX:91480391-91480435                            | NM_001039059:144   | Klh15         | INSIDE                 | 0.956                                                        | 1.934                          | 1279.09            | 2473.33            | 1.848                          | 728.56             | 1346.52            |
| A_68_P22659609 | chr3:153568957-153569001                          | NM_031870:124      | Msh4          | INSIDE                 | 0.956                                                        | 2.029                          | 1639.52            | 3326.21            | 1.939                          | 1324.55            | 2568.78            |
| A_68_P32319272 | chrX:34138495-34138539                            | NM_016783:297      | Pgrmc1        | INSIDE                 | 0.956                                                        | 2.274                          | 2937.00            | 6678.02            | 2.173                          | 1297.31            | 2819.63            |
| A_68_P21843325 | chr2:168577925-168577969                          | NM_175303:14755    | Sall4         | INSIDE                 | 0.956                                                        | 2.520                          | 1293.03            | 3258.06            | 2.409                          | 1032.64            | 2487.51            |
| A_68_P22207890 | chr3:66785065-66785109                            | NM_013665:607      | Shox2         | INSIDE                 | 0.956                                                        | 7.540                          | 600.45             | 4527.71            | 7.207                          | 538.83             | 3883.61            |
| A_68_P20723684 | chr1:154750088-154750132                          | NM_001005507:-334  | Smg7          | PROMOTER               | 0.956                                                        | 3.453                          | 995.18             | 3436.09            | 3.302                          | 963.71             | 3181.71            |
| A_68_P28607920 | chr12:87420588-87420632                           | NM_009368:-619     | Tgfb3         | DIVERGENT_PROMOTER     | 0.956                                                        | 0.485                          | 1808.96            | 877.50             | 0.464                          | 1498.61            | 695.11             |
| A_68_P23463653 | chr5:7344782-7344826                              | NM_001163223:-426  | Zfp804b       | PROMOTER               | 0.956                                                        | 1.985                          | 832.43             | 1651.99            | 1.898                          | 889.98             | 1689.06            |
| A_68_P26304291 | chr9:11277863-11277907                            |                    | Unknown       |                        | 0.956                                                        | 2.403                          | 510.57             | 1227.14            | 2.298                          | 451.74             | 1038.07            |
| A_68_P28178206 | chr11:119352324-119352368                         | NM_001164636:-314  | A730011L01Rik | PROMOTER               | 0.955                                                        | 0.510                          | 1544.29            | 787.09             | 0.487                          | 1180.90            | 574.55             |
| A_68_P27533697 | chr10:126486074-126486118                         | NM_010009:795      | Cyp27b1       | INSIDE                 | 0.955                                                        | 0.621                          | 1069.91            | 664.84             | 0.594                          | 917.02             | 544.42             |
| A_68_P24156008 | chr5:144077206-144077250                          | NM_172726:-189     | E130309D02Rik | PROMOTER               | 0.955                                                        | 0.616                          | 1817.82            | 1119.85            | 0.589                          | 1371.11            | 807.03             |
| A_68_P28748275 | chr12:113399969-113400013                         | NM_001097621:15572 | Kif26a        | INSIDE                 | 0.955                                                        | 3.309                          | 2655.44            | 8786.70            | 3.160                          | 2009.42            | 6350.13            |
| A_68_P21137730 | chr2:35947180-35947224                            | NM_001083126:12378 | Lhx6          | INSIDE                 | 0.955                                                        | 1.893                          | 979.93             | 1854.85            | 1.808                          | 824.89             | 1491.21            |
| A_68_P26709438 | chr9:88221992-88222036                            | NM_011851:-432     | Nt5c          | PROMOTER               | 0.955                                                        | 1.607                          | 1083.63            | 1741.06            | 1.535                          | 929.26             | 1426.31            |
| A_68_P26242532 | chr8:126472872-126472916                          | NM_172288:271      | Nup133        | INSIDE                 | 0.955                                                        | 1.490                          | 1427.66            | 2126.63            | 1.422                          | 1213.57            | 1725.67            |
| A_68_P24381545 | chr6:39068163-39068207                            | NM_172893:164      | Parp12        | INSIDE                 | 0.955                                                        | 3.098                          | 338.47             | 1048.60            | 2.957                          | 338.51             | 1001.13            |
| A_68_P31097497 | chr17:24607518-24607562                           | NM_025954:123      | Pgp           | INSIDE                 | 0.955                                                        | 0.536                          | 1698.35            | 910.79             | 0.512                          | 1297.88            | 664.88             |

| ProbeName      | Target position of probe on CpG island microarray | TargetID              | GeneSymbol | CpG island Description | Ratio of relative methylation (TiO <sub>2</sub> -NP/Vehicle) | Sham group                     |                    |                    | TiO <sub>2</sub> -H group      |                    |                    |
|----------------|---------------------------------------------------|-----------------------|------------|------------------------|--------------------------------------------------------------|--------------------------------|--------------------|--------------------|--------------------------------|--------------------|--------------------|
|                |                                                   |                       |            |                        |                                                              | Relative methylation (Cy5/Cy3) | Cy3 signal (Input) | Cy5 signal (MeDIP) | Relative methylation (Cy5/Cy3) | Cy3 signal (Input) | Cy5 signal (MeDIP) |
| A_68_P25505712 | chr7:134615346-134615390                          | NM_145589:241         | Prr14      | INSIDE                 | 0.955                                                        | 0.447                          | 1552.59            | 693.42             | 0.427                          | 1363.49            | 581.63             |
| A_68_P28863269 | chr13:19715200-19715245                           | NM_016687:179         | Sfrp4      | INSIDE                 | 0.955                                                        | 2.584                          | 369.66             | 955.19             | 2.467                          | 289.85             | 715.04             |
| A_68_P23158194 | chr4:101760223-101760267                          | ENSMUST00000106911:97 |            | INSIDE                 | 0.955                                                        | 0.667                          | 1763.67            | 1177.15            | 0.637                          | 1724.37            | 1098.96            |
| A_68_P25090215 | chr7:52185401-52185445                            | NM_001077264:-562     | Ap2a1      | PROMOTER               | 0.954                                                        | 0.460                          | 1559.85            | 717.83             | 0.439                          | 1358.75            | 596.73             |
| A_68_P29523393 | chr14:34133081-34133125                           | NM_153800:103094      | Arhgap22   | INSIDE                 | 0.954                                                        | 0.534                          | 1814.67            | 968.68             | 0.509                          | 1356.39            | 690.72             |
| A_68_P32233092 | chrX:5660427-5660471                              | NM_001033211:90       | AU022751   | INSIDE                 | 0.954                                                        | 2.287                          | 618.24             | 1413.85            | 2.182                          | 293.52             | 640.38             |
| A_68_P27892695 | chr11:68853469-68853515                           | NM_011496:-5652       | Aurkb      | PROMOTER               | 0.954                                                        | 1.516                          | 1056.03            | 1600.72            | 1.447                          | 832.58             | 1204.37            |
| A_68_P28047197 | chr11:96723274-96723318                           | NM_019877:12107       | Copz2      | DOWNSTREAM             | 0.954                                                        | 1.615                          | 2150.86            | 3473.84            | 1.541                          | 1550.99            | 2389.77            |
| A_68_P24383682 | chr6:39507280-39507324                            | NM_172477:531         | Dennd2a    | INSIDE                 | 0.954                                                        | 0.501                          | 2609.72            | 1308.07            | 0.478                          | 2051.52            | 981.46             |
| A_68_P31927972 | chr19:5307824-5307868                             | NM_001024717:9516     | Gal3st3    | INSIDE                 | 0.954                                                        | 1.799                          | 1078.67            | 1940.44            | 1.717                          | 883.85             | 1517.30            |
| A_68_P26270752 | chr8:131210063-131210107                          | NM_010578:531         | Irgb1      | INSIDE                 | 0.954                                                        | 0.456                          | 2072.96            | 944.76             | 0.435                          | 1898.93            | 825.54             |
| A_68_P25031210 | chr7:31145533-31145577                            | NM_175478:2237        | Lrfn3      | INSIDE                 | 0.954                                                        | 2.155                          | 555.19             | 1196.53            | 2.056                          | 473.92             | 974.43             |
| A_68_P30477058 | chr15:98702295-98702339                           | NM_001033276:-702     | Mil2       | PROMOTER               | 0.954                                                        | 1.816                          | 978.69             | 1777.24            | 1.733                          | 830.55             | 1439.58            |
| A_68_P20075274 | chr1:20925596-20925640                            | NM_028829:44916       | Paqr8      | INSIDE                 | 0.954                                                        | 2.264                          | 1098.57            | 2487.55            | 2.160                          | 799.23             | 1726.58            |
| A_68_P28583198 | chr12:82961466-82961510                           | NM_018814:472         | Penx       | INSIDE                 | 0.954                                                        | 0.677                          | 1769.84            | 1197.56            | 0.646                          | 1493.74            | 964.70             |
| A_68_P21871014 | chr2:173485531-173485575                          | NM_024436:207         | Rab22a     | INSIDE                 | 0.954                                                        | 1.968                          | 3089.01            | 6079.67            | 1.878                          | 2650.30            | 4976.20            |
| A_68_P21142185 | chr2:37307958-37308002                            | NM_001033960:207      | Rabgap1    | INSIDE                 | 0.954                                                        | 0.531                          | 1686.60            | 896.29             | 0.507                          | 1461.38            | 740.76             |
| A_68_P23415822 | chr4:151362674-151362718                          | NM_001145929:399      | Thap3      | INSIDE                 | 0.954                                                        | 0.720                          | 1816.31            | 1308.55            | 0.687                          | 1408.32            | 967.60             |
| A_68_P24431877 | chr6:49214057-49214101                            | NM_198102:-27         | Tra2a      | PROMOTER               | 0.954                                                        | 0.660                          | 1099.37            | 725.21             | 0.629                          | 994.06             | 625.68             |
| A_68_P30094307 | chr15:27677421-27677465                           | NM_001081302:278161   | Trio       | INSIDE                 | 0.954                                                        | 3.859                          | 3487.62            | 13459.28           | 3.680                          | 2485.40            | 9146.76            |
| A_68_P28693529 | chr12:103996499-103996543                         | NM_025666:336         | Ubr7       | INSIDE                 | 0.954                                                        | 0.483                          | 1510.97            | 730.41             | 0.461                          | 1248.64            | 575.72             |
| A_68_P28202958 | chr12:4913875-4913919                             | NM_145441:430         | Ubxn2a     | INSIDE                 | 0.954                                                        | 2.060                          | 1176.76            | 2424.71            | 1.965                          | 1060.07            | 2083.33            |
| A_68_P24123997 | chr5:137463625-137463669                          | NM_027318:106         | Znhit1     | INSIDE                 | 0.954                                                        | 0.685                          | 1397.38            | 957.66             | 0.654                          | 1122.40            | 733.96             |
| A_68_P24159892 | chr5:144952166-144952210                          | NM_010800:1034        | Bhlha15    | INSIDE                 | 0.953                                                        | 1.540                          | 1328.00            | 2045.23            | 1.468                          | 953.73             | 1399.66            |
| A_68_P21483578 | chr2:103325096-103325140                          | NM_009804:192         | Cat        | INSIDE                 | 0.953                                                        | 0.627                          | 1379.71            | 864.72             | 0.597                          | 1074.01            | 641.70             |
| A_68_P31919589 | chr19:3852192-3852236                             | NM_001025566:442      | Chka       | INSIDE                 | 0.953                                                        | 0.554                          | 1239.57            | 687.30             | 0.528                          | 1117.50            | 590.59             |
| A_68_P31227866 | chr17:50432495-50432539                           | NM_010021:408         | Dazl       | INSIDE                 | 0.953                                                        | 1.651                          | 656.14             | 1083.06            | 1.573                          | 638.53             | 1004.26            |
| A_68_P28221326 | chr12:8308667-8308711                             | NM_013527:72          | Gd7f       | INSIDE                 | 0.953                                                        | 2.106                          | 446.54             | 940.46             | 2.007                          | 388.19             | 779.04             |
| A_68_P25512009 | chr7:135831848-135831892                          | NM_178641:76992       | Inpp5f     | INSIDE                 | 0.953                                                        | 1.530                          | 1504.42            | 2302.15            | 1.459                          | 1268.63            | 1850.90            |
| A_68_P25004857 | chr7:25217107-25217151                            | NM_199013:13573       | Irgc1      | INSIDE                 | 0.953                                                        | 2.736                          | 980.10             | 2681.66            | 2.607                          | 728.21             | 1898.59            |
| A_68_P25088775 | chr7:51926026-51926070                            | NM_028021:-5175       | Myh14      | PROMOTER               | 0.953                                                        | 0.676                          | 1210.01            | 818.09             | 0.644                          | 1067.81            | 687.88             |
| A_68_P20412597 | chr1:88423071-88423115                            | NM_008972:-218        | Ptma       | PROMOTER               | 0.953                                                        | 0.442                          | 1205.24            | 533.08             | 0.421                          | 928.24             | 391.11             |
| A_68_P29751623 | chr14:79881191-79881235                           | NM_018765:-137        | Wbp4       | PROMOTER               | 0.953                                                        | 2.138                          | 413.32             | 883.59             | 2.037                          | 297.03             | 604.94             |
| A_68_P24951675 | chr7:4982142-4982186                              | NM_001033383:10187    | Zfp865     | INSIDE                 | 0.953                                                        | 2.251                          | 2039.47            | 4591.47            | 2.145                          | 1611.87            | 3457.32            |
| A_68_P26663736 | chr9:79190551-79190595                            |                       |            | Unknown                | 0.953                                                        | 2.576                          | 592.54             | 1526.10            | 2.455                          | 570.51             | 1400.47            |
| A_68_P24159893 | chr5:144952289-144952338                          | NM_010800:1159        | Bhlha15    | INSIDE                 | 0.952                                                        | 2.218                          | 774.51             | 1717.66            | 2.111                          | 642.24             | 1356.00            |
| A_68_P31977525 | chr19:16059111-16059155                           | NM_198019:347         | Cep78      | INSIDE                 | 0.952                                                        | 0.619                          | 1873.65            | 1160.34            | 0.590                          | 1556.63            | 918.11             |
| A_68_P21911108 | chr2:181255242-181255287                          | NM_016775:55          | Dnajc5     | INSIDE                 | 0.952                                                        | 2.089                          | 1414.50            | 2954.99            | 1.989                          | 1199.12            | 2385.43            |
| A_68_P32092667 | chr19:36993325-36993369                           | NM_028263:743         | Fgfbp3     | INSIDE                 | 0.952                                                        | 2.674                          | 602.46             | 1610.76            | 2.546                          | 538.83             | 1371.93            |
| A_68_P23283635 | chr4:126803524-126803568                          | NM_001099319:257      | Gm12942    | INSIDE                 | 0.952                                                        | 2.539                          | 521.49             | 1323.85            | 2.418                          | 465.84             | 1126.25            |
| A_68_P27235136 | chr10:70844509-70844565                           | NM_027184:33996       | Ipmk       | INSIDE                 | 0.952                                                        | 1.625                          | 774.29             | 1258.02            | 1.547                          | 586.96             | 907.95             |
| A_68_P21583617 | chr2:121781672-121781716                          | NM_008545:134         | Mageb3     | INSIDE                 | 0.952                                                        | 2.052                          | 920.31             | 1888.65            | 1.953                          | 861.95             | 1683.21            |
| A_68_P23278934 | chr4:125911232-125911279                          | NM_001145970:22308    | Mtap7d1    | INSIDE                 | 0.952                                                        | 4.289                          | 283.33             | 1215.24            | 4.082                          | 230.80             | 942.10             |
| A_68_P24171760 | chr5:147889385-147889429                          | NM_181730:263         | Polr1d     | INSIDE                 | 0.952                                                        | 1.454                          | 2501.83            | 3638.73            | 1.384                          | 2189.87            | 3031.72            |
| A_68_P25481817 | chr7:130113128-130113172                          | NM_175023:-927        | Rbbp6      | PROMOTER               | 0.952                                                        | 0.619                          | 2123.82            | 1313.92            | 0.589                          | 1730.51            | 1019.23            |
| A_68_P26248944 | chr8:127536746-127536790                          | NM_016909:-128        | Tsnax      | PROMOTER               | 0.952                                                        | 0.690                          | 1878.23            | 1295.18            | 0.657                          | 1486.63            | 976.34             |
| A_68_P27932455 | chr11:76308282-76308326                           | NM_198018:14617       | Abr        | INSIDE                 | 0.951                                                        | 1.907                          | 1602.66            | 3056.94            | 1.814                          | 1368.07            | 2482.01            |
| A_68_P27804993 | chr11:53293588-53293632                           | NM_183173:87          | Ankrd43    | INSIDE                 | 0.951                                                        | 0.662                          | 1292.64            | 856.03             | 0.630                          | 1097.01            | 690.96             |
| A_68_P26169910 | chr8:114255749-114255793                          | NM_001198839:266      | Bear1      | INSIDE                 | 0.951                                                        | 2.050                          | 805.29             | 1650.51            | 1.948                          | 787.49             | 1534.13            |
| A_68_P26336206 | chr9:18096974-18097018                            | NM_025844:286         | Chordc1    | INSIDE                 | 0.951                                                        | 1.479                          | 2032.93            | 3006.03            | 1.406                          | 1760.63            | 2475.95            |
| A_68_P23284714 | chr4:127003444-127003488                          | NM_008126:2903        | Gjb3       | INSIDE                 | 0.951                                                        | 1.869                          | 1017.67            | 1902.08            | 1.777                          | 853.97             | 1517.74            |

| ProbeName      | Target position of probe on CpG island microarray | TargetID                 | GeneSymbol    | CpG island Description | Ratio of relative methylation (TiO <sub>2</sub> -NP/Vehicle) | Sham group                     |                    |                    | TiO <sub>2</sub> -H group      |                    |                    |
|----------------|---------------------------------------------------|--------------------------|---------------|------------------------|--------------------------------------------------------------|--------------------------------|--------------------|--------------------|--------------------------------|--------------------|--------------------|
|                |                                                   |                          |               |                        |                                                              | Relative methylation (Cy5/Cy3) | Cy3 signal (Input) | Cy5 signal (MeDIP) | Relative methylation (Cy5/Cy3) | Cy3 signal (Input) | Cy5 signal (MeDIP) |
| A_68_P27339938 | chr10:90545771-90545815                           | NM_026166-9              | Ikbip         | INSIDE                 | 0.951                                                        | 2.719                          | 1586.47            | 4314.39            | 2.587                          | 1367.46            | 3537.94            |
| A_68_P26700781 | chr9:86589673-86589717                            | NM_001198933-8488        | Me1           | PROMOTER               | 0.951                                                        | 1.841                          | 799.09             | 1470.86            | 1.750                          | 812.26             | 1421.83            |
| A_68_P25285295 | chr7:91032191-91032235                            | NM_030705-639            | Mesdc1        | INSIDE                 | 0.951                                                        | 2.221                          | 496.80             | 1103.61            | 2.112                          | 431.29             | 910.98             |
| A_68_P29612018 | chr14:54980756-54980800                           | NM_026936-254            | Oxa11         | INSIDE                 | 0.951                                                        | 1.774                          | 864.11             | 1532.91            | 1.687                          | 718.72             | 1212.76            |
| A_68_P23401742 | chr4:149029621-149029665                          | NM_001164052-7783        | Pik3cd        | INSIDE                 | 0.951                                                        | 2.400                          | 2923.05            | 7015.79            | 2.283                          | 2391.86            | 5460.81            |
| A_68_P24025453 | chr5:118687359-118687403                          | NM_172998-7490           | Rnf12         | INSIDE                 | 0.951                                                        | 2.926                          | 589.17             | 1724.16            | 2.784                          | 607.63             | 1691.77            |
| A_68_P31257220 | chr17:56743025-56743069                           | NM_001163300-18642       | Safb          | INSIDE                 | 0.951                                                        | 1.909                          | 1289.90            | 2462.09            | 1.815                          | 1019.44            | 1850.18            |
| A_68_P21099539 | chr2:29658324-29658368                            | NM_011989-147            | Slc27a4       | INSIDE                 | 0.951                                                        | 0.619                          | 2874.42            | 1779.42            | 0.589                          | 2197.48            | 1293.98            |
| A_68_P27287199 | chr10:80532582-80532627                           | NM_022653--223           | Thop1         | DIVERGENT_PROMOTER     | 0.951                                                        | 2.961                          | 231.60             | 685.65             | 2.816                          | 225.48             | 634.86             |
| A_68_P23984450 | chr5:111652272-111652316                          | NM_024477-343473         | Ttc28         | INSIDE                 | 0.951                                                        | 1.731                          | 647.17             | 1120.45            | 1.646                          | 552.58             | 909.65             |
| A_68_P25805587 | chr8:41508783-41508827                            | NM_178395-364            | Zdhhc2        | PROMOTER               | 0.951                                                        | 0.625                          | 1129.17            | 706.27             | 0.595                          | 942.09             | 560.54             |
| A_68_P29614459 | chr14:55433246-55433296                           | ENSMUST00000095853--2053 |               | PROMOTER               | 0.951                                                        | 3.890                          | 420.99             | 1637.70            | 3.698                          | 486.05             | 1797.33            |
| A_68_P28680132 | chr12:101369299-101369345                         | NM_183155-28541          | BC002230      | INSIDE                 | 0.950                                                        | 2.143                          | 523.21             | 1121.15            | 2.036                          | 411.71             | 838.16             |
| A_68_P24120339 | chr5:136751005-136751049                          | NM_198602-292249         | Cux1          | INSIDE                 | 0.950                                                        | 1.844                          | 1299.39            | 2395.50            | 1.752                          | 1079.89            | 1891.46            |
| A_68_P27188599 | chr10:62409837-62409881                           | NM_177372-82             | Dna2          | INSIDE                 | 0.950                                                        | 1.689                          | 1171.92            | 1979.90            | 1.605                          | 1063.89            | 1707.23            |
| A_68_P28947123 | chr13:36209265-36209309                           | NM_001039189-7           | Fars2         | INSIDE                 | 0.950                                                        | 1.652                          | 618.92             | 1022.24            | 1.570                          | 650.19             | 1020.61            |
| A_68_P22209918 | chr3:67234256-67234300                            | NM_138591-242            | Gfm1          | INSIDE                 | 0.950                                                        | 1.607                          | 1082.84            | 1740.46            | 1.527                          | 932.35             | 1423.71            |
| A_68_P24143542 | chr5:141305948-141305992                          | NM_010302-415            | Gna12         | INSIDE                 | 0.950                                                        | 0.560                          | 1264.38            | 707.97             | 0.532                          | 1040.87            | 553.58             |
| A_68_P26085826 | chr8:98412091-98412135                            | NM_010325-153            | Got2          | INSIDE                 | 0.950                                                        | 0.630                          | 953.08             | 600.12             | 0.598                          | 794.94             | 475.58             |
| A_68_P29616397 | chr14:55732548-55732592                           | NM_177049-3202           | Jph4          | INSIDE                 | 0.950                                                        | 2.187                          | 675.81             | 1478.30            | 2.078                          | 644.51             | 1339.45            |
| A_68_P25954895 | chr8:73437847-73437891                            | NM_173013-7996           | Mtap1s        | INSIDE                 | 0.950                                                        | 2.055                          | 878.16             | 1805.04            | 1.953                          | 758.42             | 1481.49            |
| A_68_P29116251 | chr13:69672583-69672627                           | NM_001169131-138         | Papd7         | INSIDE                 | 0.950                                                        | 4.069                          | 298.07             | 1212.90            | 3.865                          | 319.70             | 1235.70            |
| A_68_P22614374 | chr3:146068079-146068128                          | NM_138744-453            | Ssx2ip        | INSIDE                 | 0.950                                                        | 1.775                          | 2065.99            | 3667.38            | 1.687                          | 1556.20            | 2624.72            |
| A_68_P26948303 | chr10:12661129-12661173                           | NM_001163590-22915       | Stx11         | INSIDE                 | 0.950                                                        | 1.690                          | 839.17             | 1418.24            | 1.605                          | 735.18             | 1179.75            |
| A_68_P28755249 | chr12:114427080-114427124                         | NM_153776-2989           | Tmem121       | INSIDE                 | 0.950                                                        | 2.139                          | 520.04             | 1112.54            | 2.032                          | 460.61             | 936.02             |
| A_68_P23316766 | chr4:132833535-132833579                          | NM_025667-149            | Tmem222       | INSIDE                 | 0.950                                                        | 1.648                          | 1050.47            | 1731.49            | 1.565                          | 910.33             | 1424.80            |
| A_68_P21610507 | chr2:126702013-126702057                          | NM_001164325-37          | Trpm7         | PROMOTER               | 0.950                                                        | 0.682                          | 1252.94            | 854.32             | 0.647                          | 1117.65            | 723.63             |
| A_68_P32978434 | A_68_P32978434                                    |                          | Unknown       |                        | 0.950                                                        | 2.538                          | 1628.55            | 4133.13            | 2.412                          | 1362.62            | 3286.50            |
| A_68_P26742255 | chr9:95412044-95412088                            | NM_001114977-349         | 2610101N10Rik | INSIDE                 | 0.949                                                        | 0.503                          | 1420.62            | 714.88             | 0.477                          | 1209.80            | 577.56             |
| A_68_P22314995 | chr3:88448116-88448160                            | NM_001198912-22823       | Arhgef2       | INSIDE                 | 0.949                                                        | 2.164                          | 488.16             | 1056.49            | 2.054                          | 483.02             | 991.95             |
| A_68_P28051740 | chr11:97490459-97490503                           | NM_175332-550            | E130012A19Rik | INSIDE                 | 0.949                                                        | 2.035                          | 1804.19            | 3671.74            | 1.932                          | 1676.51            | 3238.19            |
| A_68_P21874502 | chr2:174124098-174124142                          | NM_201617-761            | Gnas          | INSIDE                 | 0.949                                                        | 1.663                          | 2169.11            | 3608.23            | 1.578                          | 1782.20            | 2813.05            |
| A_68_P32748068 | chrX:148579482-148579526                          | NM_001114664-694         | Iqsec2        | INSIDE                 | 0.949                                                        | 1.801                          | 1310.24            | 2359.55            | 1.709                          | 738.33             | 1261.54            |
| A_68_P31150605 | chr17:33954480-33954524                           | NM_030697-7035           | Kank3         | INSIDE                 | 0.949                                                        | 2.462                          | 404.17             | 995.07             | 2.337                          | 345.74             | 807.85             |
| A_68_P23752950 | chr5:65195357-65195401                            | NM_008453-617            | Klf3          | INSIDE                 | 0.949                                                        | 0.565                          | 948.37             | 536.21             | 0.537                          | 780.04             | 418.58             |
| A_68_P25048197 | chr7:35988690-35988734                            | NM_001024707-11652       | Lrp3          | INSIDE                 | 0.949                                                        | 1.793                          | 1306.48            | 2342.27            | 1.702                          | 978.70             | 1665.35            |
| A_68_P31828826 | chr18:74130007-74130051                           | NM_172632-94575          | Mapk4         | INSIDE                 | 0.949                                                        | 2.051                          | 603.40             | 1237.87            | 1.946                          | 501.29             | 975.45             |
| A_68_P24090499 | chr5:130221338-130221382                          | NM_025450--42            | Mrps17        | DIVERGENT_PROMOTER     | 0.949                                                        | 2.952                          | 684.66             | 2021.29            | 2.801                          | 646.85             | 1811.85            |
| A_68_P25360747 | chr7:106416712-106416756                          | NM_001043355-121         | Mtap6         | PROMOTER               | 0.949                                                        | 1.784                          | 654.16             | 1166.75            | 1.693                          | 577.95             | 978.30             |
| A_68_P25091030 | chr7:52331941-52331985                            | NM_001163684-14164       | Nosip         | INSIDE                 | 0.949                                                        | 2.088                          | 934.96             | 1951.95            | 1.982                          | 747.48             | 1481.39            |
| A_68_P23198685 | chr4:108673245-108673289                          | NM_146150-143            | Nrd1          | PROMOTER               | 0.949                                                        | 1.625                          | 1514.57            | 2461.00            | 1.543                          | 1281.69            | 1977.19            |
| A_68_P27709961 | chr11:35821845-35821890                           | NM_011856-935878         | Odz2          | INSIDE                 | 0.949                                                        | 1.790                          | 925.66             | 1656.62            | 1.698                          | 763.42             | 1296.14            |
| A_68_P28224326 | chr12:8779101-8779145                             | NM_0011519-921           | Sdc1          | INSIDE                 | 0.949                                                        | 0.592                          | 1117.41            | 661.81             | 0.562                          | 940.49             | 528.65             |
| A_68_P26316375 | chr9:14081197-14081241                            | NM_030261-474            | Sesn3         | INSIDE                 | 0.949                                                        | 1.473                          | 3222.18            | 4745.89            | 1.398                          | 2368.00            | 3310.02            |
| A_68_P26540064 | chr9:56920273-56920317                            | NM_001110350--3888       | Sin3a         | PROMOTER               | 0.949                                                        | 1.901                          | 721.72             | 1371.67            | 1.803                          | 668.74             | 1205.53            |
| A_68_P27468584 | chr10:114688310-114688354                         | NM_025706-217            | Tbc1d15       | INSIDE                 | 0.949                                                        | 0.726                          | 1912.87            | 1388.53            | 0.689                          | 1706.58            | 1175.99            |
| A_68_P32288520 | chrX:20002860-20002904                            | ENSMUST00000136093--31   |               | PROMOTER               | 0.949                                                        | 2.872                          | 1179.57            | 3388.24            | 2.725                          | 868.15             | 2365.54            |
| A_68_P31939730 | chr19:7498138-7498182                             | NM_175381-6046           | 2700081O15Rik | INSIDE                 | 0.948                                                        | 0.539                          | 969.76             | 522.24             | 0.510                          | 837.73             | 427.62             |
| A_68_P29450644 | chr14:21895153-21895197                           | NM_134079-23320          | Adk           | INSIDE                 | 0.948                                                        | 1.986                          | 861.34             | 1710.25            | 1.882                          | 737.54             | 1387.95            |
| A_68_P26822031 | chr9:110019702-110019746                          | NM_133347--1638          | Dhx30         | PROMOTER               | 0.948                                                        | 1.768                          | 1211.54            | 2142.19            | 1.676                          | 1108.21            | 1857.76            |
| A_68_P23553583 | chr5:27144126-27144170                            | NM_010075-252            | Dpp6          | INSIDE                 | 0.948                                                        | 0.484                          | 1113.86            | 538.90             | 0.459                          | 945.83             | 433.82             |



| ProbeName      | Target position of probe on CpG island microarray | TargetID           | GeneSymbol    | CpG island Description | Ratio of relative methylation (TiO <sub>2</sub> -NP/Vehicle) | Sham group                     |                    |                    | TiO <sub>2</sub> -H group      |                    |                    |
|----------------|---------------------------------------------------|--------------------|---------------|------------------------|--------------------------------------------------------------|--------------------------------|--------------------|--------------------|--------------------------------|--------------------|--------------------|
|                |                                                   |                    |               |                        |                                                              | Relative methylation (Cy5/Cy3) | Cy3 signal (Input) | Cy5 signal (MeDIP) | Relative methylation (Cy5/Cy3) | Cy3 signal (Input) | Cy5 signal (MeDIP) |
| A_68_P32408596 | chrX:56387279-56387323                            | NM_010200:313      | Fgf13         | INSIDE                 | 0.948                                                        | 2.347                          | 2716.44            | 6374.24            | 2.225                          | 1557.16            | 3464.98            |
| A_68_P25087544 | chr7:51716906-51716950                            | NM_198250:19072    | Lrrc4b        | INSIDE                 | 0.948                                                        | 2.165                          | 1247.86            | 2701.19            | 2.053                          | 985.60             | 2023.04            |
| A_68_P23536419 | chr5:22940563-22940607                            | NM_026984:338      | Mil5          | INSIDE                 | 0.948                                                        | 0.610                          | 1181.44            | 720.77             | 0.579                          | 936.20             | 541.73             |
| A_68_P27278628 | chr10:79202047-79202091                           | NM_172551:7258     | Polmt         | INSIDE                 | 0.948                                                        | 2.075                          | 1313.39            | 2725.53            | 1.968                          | 1085.54            | 2136.67            |
| A_68_P31862907 | chr18:80397180-80397224                           | NM_199197:156      | Rbfa          | INSIDE                 | 0.948                                                        | 1.621                          | 828.14             | 1342.67            | 1.537                          | 713.65             | 1096.65            |
| A_68_P31196988 | chr17:44872166-44872210                           | NM_001145920:1409  | Runx2         | INSIDE                 | 0.948                                                        | 0.593                          | 1390.44            | 824.05             | 0.562                          | 1029.09            | 578.09             |
| A_68_P27228616 | chr10:69707646-69707690                           | NM_025807:-355     | Slc16a9       | PROMOTER               | 0.948                                                        | 0.436                          | 1218.78            | 531.92             | 0.414                          | 1025.53            | 424.23             |
| A_68_P25075290 | chr7:48158061-48158105                            | NM_021387:3435     | Vstm2b        | INSIDE                 | 0.948                                                        | 1.871                          | 1151.28            | 2154.08            | 1.775                          | 958.72             | 1701.34            |
| A_68_P28729930 | chr12:110032477-110032521                         | NM_009537:978      | Yy1           | INSIDE                 | 0.948                                                        | 1.817                          | 1001.90            | 1820.51            | 1.723                          | 872.94             | 1504.05            |
| A_68_P24631963 | chr6:90319610-90319654                            | NM_030260:145      | Zxdc          | INSIDE                 | 0.948                                                        | 1.656                          | 650.36             | 1077.09            | 1.570                          | 636.97             | 1000.00            |
| A_68_P25730016 | chr8:27096591-27096635                            | NM_029037:7981     | 4930444A02Rik | INSIDE                 | 0.947                                                        | 2.557                          | 802.93             | 2053.10            | 2.420                          | 671.46             | 1625.27            |
| A_68_P30357051 | chr15:77825627-77825674                           | NM_007583:124060   | Cacng2        | INSIDE                 | 0.947                                                        | 3.122                          | 698.41             | 2180.23            | 2.958                          | 746.80             | 2208.75            |
| A_68_P24798777 | chr6:120442544-120442588                          | NM_033567:1259     | Cecr6         | INSIDE                 | 0.947                                                        | 0.623                          | 1083.29            | 674.47             | 0.589                          | 945.78             | 557.54             |
| A_68_P21221950 | chr2:52717844-52717888                            | NM_172409:965      | Fmn12         | INSIDE                 | 0.947                                                        | 0.511                          | 1484.84            | 758.85             | 0.484                          | 1205.24            | 583.53             |
| A_68_P31978255 | chr19:16207934-16207978                           | NM_008139:636      | Gnaq          | INSIDE                 | 0.947                                                        | 2.497                          | 3619.36            | 9037.74            | 2.366                          | 3063.27            | 7246.82            |
| A_68_P26220842 | chr8:123060303-123060347                          | NM_001145896:-984  | Gse1          | PROMOTER               | 0.947                                                        | 0.653                          | 2028.37            | 1324.77            | 0.619                          | 1175.02            | 1079.87            |
| A_68_P32378027 | chrX:49034445-49034489                            | NM_015819:-812     | Hs6st2        | PROMOTER               | 0.947                                                        | 1.945                          | 846.63             | 1646.45            | 1.841                          | 582.14             | 1071.84            |
| A_68_P23252661 | chr4:120370848-120370892                          | NM_001081142:48911 | Kenq4         | INSIDE                 | 0.947                                                        | 3.449                          | 3645.73            | 12574.45           | 3.267                          | 2683.92            | 8768.79            |
| A_68_P32697224 | chrX:136596652-136596696                          | NM_001081668:433   | Nup62cl       | INSIDE                 | 0.947                                                        | 2.098                          | 2824.97            | 5927.37            | 1.987                          | 1577.19            | 3134.01            |
| A_68_P24697527 | chr6:101327639-101327683                          | NM_018884:231      | Pdzrn3        | INSIDE                 | 0.947                                                        | 1.637                          | 703.14             | 1151.28            | 1.551                          | 652.32             | 1011.68            |
| A_68_P28100896 | chr11:106181914-106181958                         | NM_133199:28768    | Scn4a         | INSIDE                 | 0.947                                                        | 2.129                          | 476.92             | 1015.42            | 2.016                          | 381.97             | 770.16             |
| A_68_P23893507 | chr5:92739062-92739106                            | NM_172713:-34      | Sdad1         | PROMOTER               | 0.947                                                        | 0.613                          | 1081.42            | 662.41             | 0.580                          | 898.38             | 520.93             |
| A_68_P22031740 | chr3:30993764-30993808                            | NM_001039090:-196  | Skil          | PROMOTER               | 0.947                                                        | 2.467                          | 473.40             | 1167.79            | 2.336                          | 458.60             | 1071.50            |
| A_68_P30015973 | chr15:11313872-11313916                           | NM_033074:15519    | Tars          | INSIDE                 | 0.947                                                        | 1.980                          | 419.00             | 829.46             | 1.874                          | 312.13             | 585.04             |
| A_68_P32226231 | chr19:60657044-60657088                           | NM_001172096:-140  | 2700078E11Rik | PROMOTER               | 0.946                                                        | 0.663                          | 1307.06            | 866.11             | 0.627                          | 1010.77            | 633.57             |
| A_68_P22142067 | chr3:53283022-53283066                            | NM_173382:15306    | 2810046L04Rik | INSIDE                 | 0.946                                                        | 2.409                          | 818.74             | 1972.34            | 2.278                          | 753.75             | 1717.07            |
| A_68_P31096787 | chr17:24488644-24488688                           | NM_001039581:-324  | Abca3         | DIVERGENT_PROMOTER     | 0.946                                                        | 0.612                          | 908.95             | 556.50             | 0.579                          | 715.47             | 414.61             |
| A_68_P24980794 | chr7:16899349-16899393                            | NM_133234:4439     | Bbc3          | INSIDE                 | 0.946                                                        | 0.403                          | 1364.78            | 550.52             | 0.470                          | 1106.48            | 422.27             |
| A_68_P27933408 | chr11:76486478-76486522                           | NM_177182:529      | Bhlha9        | INSIDE                 | 0.946                                                        | 0.455                          | 1610.89            | 733.29             | 0.431                          | 1333.24            | 574.16             |
| A_68_P26022160 | chr8:87356049-87356093                            | NM_201227:-9348    | Dand5         | PROMOTER               | 0.946                                                        | 0.503                          | 1731.61            | 871.30             | 0.476                          | 1431.56            | 681.49             |
| A_68_P28036777 | chr11:94982683-94982727                           | NM_010055:1274     | Dlx3          | INSIDE                 | 0.946                                                        | 0.596                          | 1243.10            | 740.84             | 0.564                          | 1090.73            | 614.81             |
| A_68_P27093483 | chr10:41917159-41917203                           | NM_019740:79368    | Foxo3         | INSIDE                 | 0.946                                                        | 1.894                          | 1674.37            | 3170.51            | 1.792                          | 1248.38            | 2236.58            |
| A_68_P31515587 | chr18:15222623-15222667                           | NM_001142731:-553  | Ketd1         | PROMOTER               | 0.946                                                        | 2.206                          | 1302.36            | 2873.42            | 2.087                          | 1080.43            | 2254.95            |
| A_68_P24921913 | chr6:145198164-145198208                          | NM_021284:565      | Kras          | INSIDE                 | 0.946                                                        | 0.713                          | 1827.39            | 1302.38            | 0.674                          | 1510.40            | 1018.27            |
| A_68_P25025265 | chr7:29870930-29870974                            | NR_035489:-2239    | Mir1963       | PROMOTER               | 0.946                                                        | 2.665                          | 705.36             | 1879.64            | 2.521                          | 621.96             | 1567.73            |
| A_68_P28961841 | chr13:38726802-38726846                           | NM_139063:154      | Muted         | INSIDE                 | 0.946                                                        | 0.497                          | 2137.73            | 1061.59            | 0.470                          | 1669.08            | 784.06             |
| A_68_P31110246 | chr17:26576080-26576124                           | NM_001081656:24193 | Neur11b       | INSIDE                 | 0.946                                                        | 1.773                          | 745.70             | 1322.39            | 1.677                          | 688.70             | 1154.89            |
| A_68_P27261657 | chr10:75837670-75837714                           | NM_008787:67965    | Pent          | INSIDE                 | 0.946                                                        | 3.115                          | 792.24             | 2468.18            | 2.948                          | 773.42             | 2280.40            |
| A_68_P25169318 | chr7:69609337-69609381                            | NM_013788:38       | Peg12         | INSIDE                 | 0.946                                                        | 3.281                          | 735.56             | 2413.63            | 3.106                          | 744.26             | 2311.47            |
| A_68_P21005392 | chr2:11212245-11212289                            | NM_008859:118258   | Prkcq         | INSIDE                 | 0.946                                                        | 2.137                          | 735.89             | 1572.82            | 2.023                          | 631.92             | 1278.11            |
| A_68_P28159661 | chr11:116351482-116351526                         | NM_026364:156      | Prpsap1       | INSIDE                 | 0.946                                                        | 3.643                          | 7548.92            | 27497.03           | 3.446                          | 5932.00            | 20439.50           |
| A_68_P26540069 | chr9:56920831-56920875                            | NM_001110350:-3330 | Sin3a         | PROMOTER               | 0.946                                                        | 1.459                          | 2615.39            | 3815.11            | 1.380                          | 2020.45            | 2788.38            |
| A_68_P21682258 | chr2:139892550-139892594                          | NM_001159640:-51   | Tasp1         | PROMOTER               | 0.946                                                        | 0.610                          | 1467.19            | 894.95             | 0.577                          | 1226.02            | 707.29             |
| A_68_P21747902 | chr2:151968924-151968968                          | NM_009328:-398     | Tcf15         | PROMOTER               | 0.946                                                        | 0.621                          | 1002.71            | 622.91             | 0.587                          | 803.39             | 471.93             |
| A_68_P22860681 | chr4:41082365-41082409                            | NM_026275:-667     | Ube2r2        | PROMOTER               | 0.946                                                        | 2.082                          | 2362.25            | 4917.10            | 1.970                          | 2012.58            | 3964.55            |
| A_68_P32753662 | chrX:149932604-149932648                          | NM_018798:-148     | Ubqln2        | PROMOTER               | 0.946                                                        | 2.655                          | 486.17             | 1291.01            | 2.511                          | 283.40             | 711.64             |
| A_68_P31087860 | chr17:22058016-22058060                           | NM_001199048:41393 | Zfp942        | DOWNSTREAM             | 0.946                                                        | 2.173                          | 1132.14            | 2460.65            | 2.055                          | 1150.69            | 2364.87            |
| A_68_P24449794 | chr6:52256292-52256336                            | NR_038163:8512     | 5730457N03Rik | DOWNSTREAM             | 0.945                                                        | 0.588                          | 1786.96            | 1051.20            | 0.556                          | 1363.13            | 758.06             |
| A_68_P25430230 | chr7:120513248-120513292                          | NM_133700:-417     | Btbd10        | PROMOTER               | 0.945                                                        | 2.884                          | 1010.02            | 2912.97            | 2.725                          | 953.11             | 2597.00            |
| A_68_P26581355 | chr9:64188489-64188533                            | NM_172519:-246     | Dis3l         | PROMOTER               | 0.945                                                        | 0.524                          | 1460.70            | 765.96             | 0.496                          | 1186.66            | 588.05             |
| A_68_P30588851 | chr16:20672864-20672908                           | NM_001005331:65    | Eif4g1        | INSIDE                 | 0.945                                                        | 0.596                          | 2425.81            | 1445.29            | 0.563                          | 1983.47            | 1116.34            |

| ProbeName      | Target position of probe on CpG island microarray | TargetID           | GeneSymbol    | CpG island Description | Ratio of relative methylation (TiO <sub>2</sub> -NP/Vehicle) | Sham group                     |                    |                    | TiO <sub>2</sub> -H group      |                    |                    |
|----------------|---------------------------------------------------|--------------------|---------------|------------------------|--------------------------------------------------------------|--------------------------------|--------------------|--------------------|--------------------------------|--------------------|--------------------|
|                |                                                   |                    |               |                        |                                                              | Relative methylation (Cy5/Cy3) | Cy3 signal (Input) | Cy5 signal (MeDIP) | Relative methylation (Cy5/Cy3) | Cy3 signal (Input) | Cy5 signal (MeDIP) |
| A_68_P26224694 | chr8:123651817-123651861                          | NM_008024:254      | Foxl1         | INSIDE                 | 0.945                                                        | 0.587                          | 1549.82            | 910.50             | 0.555                          | 1383.76            | 768.08             |
| A_68_P20679834 | chr1:145586536-145586580                          | NM_001038592:-139  | Glxr2         | PROMOTER               | 0.945                                                        | 2.550                          | 1450.77            | 3699.63            | 2.410                          | 1244.38            | 2999.39            |
| A_68_P24131923 | chr5:139297423-139297474                          | NM_001195128:1415  | Gm5294        | INSIDE                 | 0.945                                                        | 0.615                          | 3755.96            | 2308.38            | 0.581                          | 2559.10            | 1486.48            |
| A_68_P24176695 | chr5:148768968-148769012                          | NM_029920:95       | Mtus2         | INSIDE                 | 0.945                                                        | 0.506                          | 1537.91            | 777.52             | 0.478                          | 1269.36            | 606.38             |
| A_68_P21078907 | chr2:26321004-26321048                            | NM_008714:38316    | Notch1        | INSIDE                 | 0.945                                                        | 2.106                          | 1488.18            | 3134.76            | 1.991                          | 1104.51            | 2199.57            |
| A_68_P27833619 | chr11:58752222-58752266                           | NM_022423:164      | Rnf187        | INSIDE                 | 0.945                                                        | 2.634                          | 464.91             | 1224.41            | 2.490                          | 437.20             | 1088.45            |
| A_68_P22049380 | chr3:34548131-34548175                            | NM_011443:-774     | Sox2          | PROMOTER               | 0.945                                                        | 1.760                          | 839.32             | 1476.83            | 1.663                          | 656.92             | 1092.73            |
| A_68_P27985859 | chr11:85699856-85699900                           | NM_011536:-3686    | Tbx4          | PROMOTER               | 0.945                                                        | 1.881                          | 2279.64            | 4287.94            | 1.777                          | 1920.82            | 3413.98            |
| A_68_P21612304 | chr2:127073616-127073660                          | NM_175145:-72      | Tmem127       | DIVERGENT_PROMOTER     | 0.945                                                        | 24.852                         | 5414.66            | 134564.50          | 23.497                         | 3681.31            | 86499.55           |
| A_68_P31155255 | chr17:34817289-34817333                           | NM_031176:9831     | Tnxb          | INSIDE                 | 0.945                                                        | 1.721                          | 1001.58            | 1723.96            | 1.627                          | 759.94             | 1236.25            |
| A_68_P22168172 | chr3:58220477-58220521                            | NM_001081229:888   | Tsc22d2       | INSIDE                 | 0.945                                                        | 1.751                          | 807.72             | 1414.13            | 1.655                          | 739.43             | 1223.44            |
| A_68_P29081872 | chr13:59924315-59924359                           | NM_153538:172      | Zechc6        | INSIDE                 | 0.945                                                        | 1.601                          | 1031.74            | 1651.67            | 1.513                          | 928.02             | 1403.84            |
| A_68_P26233343 | chr8:124956522-124956566                          | NM_007806:296      | Cyba          | INSIDE                 | 0.944                                                        | 1.813                          | 777.61             | 1409.71            | 1.711                          | 731.03             | 1250.78            |
| A_68_P26659375 | chr9:78243556-78243600                            | NM_001191044:-5    | Ddx43         | PROMOTER               | 0.944                                                        | 3.376                          | 724.26             | 2445.23            | 3.186                          | 759.30             | 2419.45            |
| A_68_P24795426 | chr6:119797651-119797695                          | NM_053204:496      | Erc1          | INSIDE                 | 0.944                                                        | 1.456                          | 6328.99            | 9215.64            | 1.375                          | 4864.59            | 6689.62            |
| A_68_P24990861 | chr7:19590354-19590398                            | NM_178757:963      | Irf2bp1       | INSIDE                 | 0.944                                                        | 2.185                          | 636.71             | 1391.04            | 2.062                          | 461.79             | 952.33             |
| A_68_P28185783 | chr11:120494397-120494441                         | NM_010756:443      | Mafg          | INSIDE                 | 0.944                                                        | 1.615                          | 805.42             | 1300.70            | 1.524                          | 836.72             | 1275.08            |
| A_68_P28875768 | chr13:22097992-22098036                           | NM_019429:3596     | Prss16        | INSIDE                 | 0.944                                                        | 1.533                          | 1141.69            | 1749.83            | 1.447                          | 996.14             | 1441.49            |
| A_68_P21115159 | chr2:32252005-32252049                            | NM_133783:617      | Ptges2        | INSIDE                 | 0.944                                                        | 2.056                          | 756.72             | 1555.81            | 1.942                          | 694.65             | 1348.76            |
| A_68_P30496912 | chr15:102087767-102087811                         | NM_011244:126      | Rarg          | INSIDE                 | 0.944                                                        | 1.689                          | 1292.35            | 2182.69            | 1.594                          | 1127.42            | 1796.95            |
| A_68_P25499765 | chr7:133435758-133435803                          | NM_145587:19648    | Sbk1          | INSIDE                 | 0.944                                                        | 2.339                          | 468.23             | 1095.39            | 2.208                          | 434.13             | 958.77             |
| A_68_P29699984 | chr14:70605667-70605711                           | NM_011366:1756     | Sorbs3        | INSIDE                 | 0.944                                                        | 1.707                          | 797.44             | 1361.28            | 1.611                          | 627.37             | 1010.57            |
| A_68_P30250398 | chr15:58654714-58654758                           | NM_175212:246      | Tmem65        | INSIDE                 | 0.944                                                        | 2.123                          | 577.90             | 1227.09            | 2.005                          | 528.23             | 1059.01            |
| A_68_P24956428 | chr7:6649272-6649316                              | NM_011769:-151     | Zim1          | PROMOTER               | 0.944                                                        | 1.981                          | 468.49             | 927.94             | 1.870                          | 433.58             | 810.59             |
| A_68_P23093077 | chr4:88583855-88583899                            |                    |               | Unknown                | 0.944                                                        | 1.678                          | 1118.47            | 1876.96            | 1.584                          | 903.53             | 1431.23            |
| A_68_P23747547 | chr5:64203832-64203876                            | NM_029554:121      | 0610040J01Rik | INSIDE                 | 0.943                                                        | 2.505                          | 463.36             | 1160.70            | 2.362                          | 410.75             | 970.19             |
| A_68_P22832217 | chr4:34663673-34663717                            | NM_027041:13761    | 1700003M02Rik | INSIDE                 | 0.943                                                        | 2.878                          | 323.36             | 930.79             | 2.715                          | 270.54             | 734.41             |
| A_68_P31124400 | chr17:28943442-28943486                           | NM_001081315:5394  | Brpf3         | INSIDE                 | 0.943                                                        | 1.609                          | 1023.69            | 1647.24            | 1.518                          | 758.95             | 1151.74            |
| A_68_P24610262 | chr6:86422458-86422502                            | NR_027370:33841    | C87436        | DOWNSTREAM             | 0.943                                                        | 1.442                          | 3397.02            | 4898.03            | 1.360                          | 2426.23            | 3299.22            |
| A_68_P27172918 | chr10:59649296-59649341                           | NM_016803:32690    | Chst3         | INSIDE                 | 0.943                                                        | 1.922                          | 663.70             | 1275.84            | 1.813                          | 487.75             | 884.24             |
| A_68_P26017804 | chr8:86566375-86566419                            | NM_016671:78       | Il27r1        | INSIDE                 | 0.943                                                        | 0.695                          | 1628.08            | 1131.01            | 0.655                          | 1304.68            | 854.36             |
| A_68_P33007162 | chr8:121970673-121970717                          | NM_054095:76       | Necab2        | INSIDE                 | 0.943                                                        | 0.679                          | 1627.56            | 1104.46            | 0.640                          | 1443.05            | 923.56             |
| A_68_P21098346 | chr2:29475741-29475785                            | NM_001039086:523   | Rapgef1       | INSIDE                 | 0.943                                                        | 0.431                          | 1349.14            | 581.07             | 0.406                          | 1137.69            | 462.01             |
| A_68_P26823381 | chr9:110283194-110283238                          | NM_001001144:47420 | Scap          | INSIDE                 | 0.943                                                        | 2.046                          | 2323.51            | 4752.96            | 1.929                          | 1818.29            | 3507.89            |
| A_68_P22323187 | chr3:89856233-89856277                            | NM_028475:143      | Ubap21        | INSIDE                 | 0.943                                                        | 1.791                          | 883.68             | 1583.05            | 1.689                          | 550.99             | 930.46             |
| A_68_P32462209 | chrX:70599489-70599533                            | NM_001160229:11551 | Zfp275        | INSIDE                 | 0.943                                                        | 2.784                          | 440.74             | 1227.21            | 2.625                          | 246.32             | 646.50             |
| A_68_P24955007 | chr7:6282885-6282929                              | NM_001033249:-870  | Zfp583        | PROMOTER               | 0.943                                                        | 0.413                          | 1286.23            | 531.11             | 0.389                          | 1166.04            | 453.82             |
| A_68_P23593510 | chr5:34631368-34631412                            | NM_001015039:-417  | Zfyve28       | PROMOTER               | 0.943                                                        | 0.487                          | 1090.78            | 531.29             | 0.459                          | 924.19             | 424.44             |
| A_68_P28175593 | chr11:118919618-118919662                         |                    |               | Unknown                | 0.943                                                        | 0.513                          | 1413.07            | 724.85             | 0.484                          | 1174.46            | 568.05             |
| A_68_P29998441 | chr15:8118989-8119033                             | NM_001162906:-95   | 2410089E03Rik | PROMOTER               | 0.942                                                        | 3.178                          | 846.38             | 2689.70            | 2.955                          | 756.40             | 2265.47            |
| A_68_P27262974 | chr10:76059438-76059482                           | NM_146007:26689    | Col6a2        | INSIDE                 | 0.942                                                        | 2.102                          | 2516.49            | 5290.32            | 1.980                          | 1808.44            | 3580.44            |
| A_68_P31227872 | chr17:50433053-50433097                           | NM_010021:-150     | Dazl          | PROMOTER               | 0.942                                                        | 1.816                          | 1051.38            | 1909.44            | 1.710                          | 818.52             | 1399.97            |
| A_68_P27612237 | chr11:16652694-16652738                           | NM_007912:511      | Egfr          | INSIDE                 | 0.942                                                        | 0.501                          | 1344.60            | 673.73             | 0.472                          | 1170.83            | 552.86             |
| A_68_P20644879 | chr1:138157097-138157141                          | NM_001101516:332   | Gpr25         | INSIDE                 | 0.942                                                        | 2.683                          | 228.53             | 613.12             | 2.528                          | 235.83             | 596.15             |
| A_68_P23753094 | chr5:65213362-65213406                            | NM_008453:18623    | Klf3          | INSIDE                 | 0.942                                                        | 2.863                          | 2103.00            | 6021.37            | 2.697                          | 1693.60            | 4567.94            |
| A_68_P31130219 | chr17:29989367-29989411                           | NM_001081160:35439 | Mdga1         | INSIDE                 | 0.942                                                        | 2.105                          | 2321.67            | 4886.79            | 1.982                          | 1727.19            | 3422.96            |
| A_68_P22373051 | chr3:100881021-100881065                          | NM_011197:33047    | Ptgfrn        | INSIDE                 | 0.942                                                        | 2.037                          | 1378.53            | 2807.74            | 1.919                          | 1035.87            | 1988.00            |
| A_68_P23457020 | chr5:5694251-5694295                              | NM_001103156:-195  | Steap2        | PROMOTER               | 0.942                                                        | 0.688                          | 3441.84            | 2368.77            | 0.648                          | 2358.68            | 1788.69            |
| A_68_P32700064 | chrX:137133979-137134023                          | NM_001077364:1061  | Tsc22d3       | INSIDE                 | 0.942                                                        | 1.946                          | 760.45             | 1480.05            | 1.833                          | 494.69             | 906.81             |
| A_68_P30716739 | chr16:43618530-43618574                           | NM_019778:371156   | Zbtb20        | INSIDE                 | 0.942                                                        | 2.334                          | 388.90             | 907.50             | 2.199                          | 345.38             | 759.57             |
| A_68_P25264699 | chr7:87226574-87226619                            | NM_175433:55483    | Zfp710        | INSIDE                 | 0.942                                                        | 4.519                          | 1354.71            | 6122.23            | 4.259                          | 939.94             | 4003.00            |

| ProbeName      | Target position of probe on CpG island microarray | TargetID               | GeneSymbol    | CpG island Description | Ratio of relative methylation (TiO <sub>2</sub> -NP/Vehicle) | Sham group                     |                    |                    | TiO <sub>2</sub> -H group      |                    |                    |
|----------------|---------------------------------------------------|------------------------|---------------|------------------------|--------------------------------------------------------------|--------------------------------|--------------------|--------------------|--------------------------------|--------------------|--------------------|
|                |                                                   |                        |               |                        |                                                              | Relative methylation (Cy5/Cy3) | Cy3 signal (Input) | Cy5 signal (MeDIP) | Relative methylation (Cy5/Cy3) | Cy3 signal (Input) | Cy5 signal (MeDIP) |
| A_68_P32975877 | A_68_P32975877                                    |                        |               | Unknown                | 0.942                                                        | 1.893                          | 1860.06            | 3521.33            | 1.784                          | 1384.30            | 2469.45            |
| A_68_P28741419 | chr12:112215560-112215604                         | NM_175207:1649         | Ankrd9        | INSIDE                 | 0.941                                                        | 1.626                          | 793.35             | 1289.94            | 1.531                          | 611.01             | 935.23             |
| A_68_P27143036 | chr10:53317089-53317133                           | NM_025541:344          | Asf1a         | INSIDE                 | 0.941                                                        | 1.458                          | 2012.07            | 2934.53            | 1.372                          | 1630.53            | 2237.28            |
| A_68_P28525477 | chr12:72411137-72411181                           | NM_001190466:288       | Dact1         | INSIDE                 | 0.941                                                        | 2.192                          | 619.26             | 1357.53            | 2.063                          | 506.29             | 1044.40            |
| A_68_P32006563 | chr19:21547067-21547111                           | NM_010266:63           | Gda           | INSIDE                 | 0.941                                                        | 1.768                          | 627.23             | 1108.87            | 1.664                          | 557.66             | 928.16             |
| A_68_P24636903 | chr6:91066915-91066959                            | NM_018815:-116         | Nup210        | PROMOTER               | 0.941                                                        | 0.454                          | 1336.05            | 606.29             | 0.427                          | 1065.66            | 454.90             |
| A_68_P30587014 | chr16:20302209-20302253                           | NM_001005767:205       | Par1          | INSIDE                 | 0.941                                                        | 0.437                          | 1815.83            | 792.98             | 0.411                          | 1510.87            | 621.17             |
| A_68_P24759852 | chr6:113445089-113445133                          | NM_172487:6702         | Prmt3         | INSIDE                 | 0.941                                                        | 1.771                          | 1120.24            | 1984.17            | 1.667                          | 949.71             | 1582.89            |
| A_68_P20427304 | chr1:90967161-90967205                            | NM_133816:146          | Sh3bp4        | INSIDE                 | 0.941                                                        | 0.657                          | 988.01             | 648.98             | 0.618                          | 945.76             | 584.65             |
| A_68_P24111847 | chr5:134652378-134652422                          | NM_033572:237          | Wbscr16       | INSIDE                 | 0.941                                                        | 0.528                          | 1901.87            | 1003.70            | 0.497                          | 1656.34            | 822.63             |
| A_68_P28553591 | chr12:77470382-77470426                           | NM_001172104:47        | Zbtb25        | INSIDE                 | 0.941                                                        | 2.515                          | 892.11             | 2243.53            | 2.368                          | 891.52             | 2110.76            |
| A_68_P29224475 | chr13:933000495-93300539                          | NM_173392:249          | Zfyve16       | INSIDE                 | 0.941                                                        | 0.704                          | 2025.36            | 1426.24            | 0.662                          | 1802.78            | 1194.08            |
| A_68_P33005898 | A_68_P33005898                                    |                        |               | Unknown                | 0.941                                                        | 3.460                          | 240.81             | 833.25             | 3.256                          | 260.17             | 847.15             |
| A_68_P27883391 | chr11:67269235-67269279                           | ENSMUST00000136796:31  |               | INSIDE                 | 0.941                                                        | 0.385                          | 1467.72            | 564.62             | 0.362                          | 1146.14            | 414.74             |
| A_68_P25594226 | chr7:149558251-149558295                          | NM_177265:-108         | 6330512M04Rik | PROMOTER               | 0.940                                                        | 3.184                          | 425.70             | 1355.52            | 2.993                          | 390.45             | 1168.47            |
| A_68_P28050586 | chr11:97301883-97301927                           | NM_021493:-9569        | Arhgap23      | PROMOTER               | 0.940                                                        | 1.598                          | 1122.42            | 1794.16            | 1.502                          | 997.97             | 1499.32            |
| A_68_P24098743 | chr5:132014457-132014501                          | NM_177047:1003735      | Aut5          | INSIDE                 | 0.940                                                        | 0.583                          | 1364.72            | 795.42             | 0.548                          | 1102.83            | 604.53             |
| A_68_P27254388 | chr10:74523771-74523815                           | NM_001081412:152       | Ber           | INSIDE                 | 0.940                                                        | 3.177                          | 694.76             | 2207.09            | 2.987                          | 739.58             | 2209.46            |
| A_68_P27100736 | chr10:43231246-43231290                           | NM_199028:32323        | Bend3         | INSIDE                 | 0.940                                                        | 3.083                          | 694.43             | 2140.99            | 2.897                          | 666.21             | 1930.18            |
| A_68_P28743718 | chr12:112615438-112615482                         | NM_183016:469          | Cdc42bpb      | INSIDE                 | 0.940                                                        | 1.894                          | 626.13             | 1185.97            | 1.781                          | 532.96             | 949.31             |
| A_68_P26224343 | chr8:123606757-123606801                          | NM_010426:-1595        | Foxf1a        | PROMOTER               | 0.940                                                        | 0.497                          | 2217.09            | 1100.96            | 0.467                          | 1745.45            | 814.80             |
| A_68_P25151569 | chr7:64846153-64846197                            | NM_008071:-368         | Gabrb3        | PROMOTER               | 0.940                                                        | 0.518                          | 2187.00            | 1132.17            | 0.486                          | 1706.30            | 830.00             |
| A_68_P25891572 | chr8:59990950-59990994                            | NM_008252:333          | Hmgb2         | INSIDE                 | 0.940                                                        | 2.112                          | 1066.80            | 2253.47            | 1.985                          | 881.81             | 1750.02            |
| A_68_P23985682 | chr5:111849354-111849398                          | NM_001081235:2191      | Mn1           | INSIDE                 | 0.940                                                        | 2.106                          | 673.48             | 1418.48            | 1.979                          | 605.51             | 1198.55            |
| A_68_P23429470 | chr4:153534460-153534504                          | NM_026388:311          | Tprgl         | INSIDE                 | 0.940                                                        | 2.046                          | 9904.95            | 20266.06           | 1.922                          | 7726.65            | 14853.14           |
| A_68_P30665800 | chr16:34745530-34745574                           | ENSMUST00000155268:257 |               | INSIDE                 | 0.940                                                        | 2.629                          | 260.28             | 684.36             | 2.472                          | 242.63             | 599.77             |
| A_68_P24172798 | chr5:148086398-148086442                          | NR_038157:-3323        | 221001911Rik  | PROMOTER               | 0.939                                                        | 0.494                          | 1607.45            | 794.38             | 0.464                          | 1341.10            | 622.45             |
| A_68_P27288887 | chr10:80787956-80788000                           | NM_027381:4131         | 2510012J08Rik | INSIDE                 | 0.939                                                        | 1.794                          | 766.38             | 1374.67            | 1.684                          | 580.83             | 977.83             |
| A_68_P21646214 | chr2:133377926-133377970                          | NM_007553:-986         | Bmp2          | PROMOTER               | 0.939                                                        | 3.550                          | 300.44             | 1066.54            | 3.335                          | 307.00             | 1023.73            |
| A_68_P30404602 | chr15:85861703-85861747                           | NM_009886:2483         | Celsr1        | INSIDE                 | 0.939                                                        | 1.756                          | 734.87             | 1290.40            | 1.648                          | 577.03             | 951.18             |
| A_68_P26526448 | chr9:54407958-54408002                            | NM_019686:-94          | Cib2          | PROMOTER               | 0.939                                                        | 2.155                          | 860.64             | 1854.25            | 2.023                          | 754.91             | 1527.00            |
| A_68_P22317611 | chr3:88972711-88972761                            | NM_001163432:4010      | Clk2          | INSIDE                 | 0.939                                                        | 2.947                          | 1251.65            | 3688.96            | 2.767                          | 898.68             | 2486.30            |
| A_68_P28576092 | chr12:81620747-81620791                           | NM_001081421:792       | Galnt1        | INSIDE                 | 0.939                                                        | 0.571                          | 1472.51            | 840.98             | 0.536                          | 1193.43            | 639.99             |
| A_68_P26035032 | chr8:89996819-89996863                            | NR_033430:130          | Gm2694        | INSIDE                 | 0.939                                                        | 0.691                          | 1843.43            | 1273.49            | 0.649                          | 1475.11            | 957.12             |
| A_68_P25394035 | chr7:112885416-112885460                          | NM_010562:200          | Ilk           | INSIDE                 | 0.939                                                        | 0.617                          | 1056.24            | 652.07             | 0.580                          | 746.90             | 433.14             |
| A_68_P22129521 | chr3:51220268-51220312                            | NM_053089:353          | Naa15         | INSIDE                 | 0.939                                                        | 0.554                          | 1466.45            | 812.38             | 0.520                          | 1114.27            | 579.70             |
| A_68_P32147396 | chr19:47124826-47124870                           | NM_027654:487          | Pegff6        | INSIDE                 | 0.939                                                        | 0.644                          | 1518.78            | 977.47             | 0.604                          | 1259.92            | 761.24             |
| A_68_P31121662 | chr17:28434204-28434248                           | NM_011145:64528        | Ppard         | INSIDE                 | 0.939                                                        | 2.365                          | 562.99             | 1331.48            | 2.220                          | 509.14             | 1130.42            |
| A_68_P32183828 | chr19:53752058-53752102                           | NM_001170847:285       | Rbm20         | INSIDE                 | 0.939                                                        | 2.127                          | 508.92             | 1082.35            | 1.997                          | 425.19             | 849.10             |
| A_68_P25588800 | chr7:148623401-148623445                          | NM_001177576:-2929     | Slc25a22      | PROMOTER               | 0.939                                                        | 0.650                          | 1965.89            | 1277.03            | 0.610                          | 1442.70            | 879.97             |
| A_68_P24320421 | chr6:28430461-28430505                            | NM_019776:135          | Snd1          | INSIDE                 | 0.939                                                        | 1.776                          | 1401.21            | 2488.93            | 1.667                          | 1109.64            | 1850.05            |
| A_68_P29478589 | chr14:26426247-26426291                           | NM_183208:147598       | Zmiz1         | INSIDE                 | 0.939                                                        | 0.609                          | 1480.53            | 900.95             | 0.571                          | 1087.21            | 621.27             |
| A_68_P27360776 | chr10:94151341-94151385                           | NR_015524:-4           | 4932415G12Rik | DIVERGENT_PROMOTER     | 0.938                                                        | 6.981                          | 1292.11            | 9020.13            | 6.550                          | 1011.53            | 6625.23            |
| A_68_P29049158 | chr13:54472997-54473041                           | NM_009946:306          | Cplx2         | INSIDE                 | 0.938                                                        | 0.694                          | 1999.40            | 1387.98            | 0.651                          | 1800.75            | 1172.88            |
| A_68_P29611636 | chr14:54873516-54873560                           | NM_001113358:66        | Dad1          | INSIDE                 | 0.938                                                        | 0.385                          | 1904.44            | 733.75             | 0.361                          | 1358.99            | 491.17             |
| A_68_P23365989 | chr4:141346549-141346593                          | NM_172338:-11          | Dnajc16       | DIVERGENT_PROMOTER     | 0.938                                                        | 2.433                          | 490.62             | 1193.88            | 2.283                          | 512.72             | 1170.76            |
| A_68_P28329060 | chr12:31758731-31758776                           | NM_027828:-79          | Fam110c       | PROMOTER               | 0.938                                                        | 0.704                          | 1708.18            | 1202.26            | 0.660                          | 1320.20            | 871.64             |
| A_68_P23320288 | chr4:133523806-133523851                          | NM_016957:78           | Hmgm2         | INSIDE                 | 0.938                                                        | 2.021                          | 591.76             | 1196.07            | 1.896                          | 465.46             | 882.40             |
| A_68_P28204868 | chr12:5216846-5216890                             | NM_001164493:165620    | Kihl29        | INSIDE                 | 0.938                                                        | 2.283                          | 1485.62            | 3391.05            | 2.141                          | 1312.03            | 2809.20            |
| A_68_P25031175 | chr7:31140774-31140818                            | NM_175478:6995         | Lrfn3         | INSIDE                 | 0.938                                                        | 2.359                          | 656.86             | 1549.79            | 2.213                          | 559.69             | 1238.72            |
| A_68_P21776626 | chr2:157193205-157193256                          | NM_026968:-99          | Manbal        | PROMOTER               | 0.938                                                        | 2.343                          | 438.75             | 1027.93            | 2.198                          | 324.14             | 712.58             |

| ProbeName      | Target position of probe on CpG island microarray | TargetID           | GeneSymbol    | CpG island Description | Ratio of relative methylation (TiO <sub>2</sub> -NP/Vehicle) | Sham group                     |                    |                    | TiO <sub>2</sub> -H group      |                    |                    |
|----------------|---------------------------------------------------|--------------------|---------------|------------------------|--------------------------------------------------------------|--------------------------------|--------------------|--------------------|--------------------------------|--------------------|--------------------|
|                |                                                   |                    |               |                        |                                                              | Relative methylation (Cy5/Cy3) | Cy3 signal (Input) | Cy5 signal (MeDIP) | Relative methylation (Cy5/Cy3) | Cy3 signal (Input) | Cy5 signal (MeDIP) |
| A_68_P30425291 | chr15:89288179-89288223                           | NM_021921:3859     | Mapk8ip2      | INSIDE                 | 0.938                                                        | 2.722                          | 1156.29            | 3147.71            | 2.554                          | 1011.50            | 2582.99            |
| A_68_P27787485 | chr11:50048388-50048432                           | NM_145926:9574     | Mgat4b        | INSIDE                 | 0.938                                                        | 2.287                          | 658.22             | 1505.65            | 2.145                          | 588.42             | 1262.21            |
| A_68_P23439845 | chr4:155027518-155027562                          | NM_011985:-47      | Mmp23         | PROMOTER               | 0.938                                                        | 0.658                          | 1282.06            | 843.71             | 0.617                          | 1014.34            | 625.97             |
| A_68_P21818281 | chr2:164332907-164332953                          | NM_133779:9906     | Pigt          | INSIDE                 | 0.938                                                        | 3.599                          | 2072.70            | 7458.85            | 3.374                          | 1373.13            | 4633.39            |
| A_68_P30423624 | chr15:88998188-88998232                           | NM_001159521:6070  | Plxbn2        | INSIDE                 | 0.938                                                        | 2.078                          | 394.84             | 820.55             | 1.949                          | 398.88             | 777.55             |
| A_68_P21261714 | chr2:60800138-60800182                            | NM_020296:1101     | Rbms1         | INSIDE                 | 0.938                                                        | 0.649                          | 1591.36            | 1032.82            | 0.609                          | 1264.91            | 769.77             |
| A_68_P31067775 | chr17:15968105-15968150                           | NM_178615:-4577    | Rgmb          | PROMOTER               | 0.938                                                        | 1.714                          | 1439.57            | 2467.33            | 1.608                          | 1291.47            | 2076.14            |
| A_68_P20165363 | chr1:39424634-39424678                            | NM_053257:-39      | Rpl31         | PROMOTER               | 0.938                                                        | 0.592                          | 3993.95            | 2363.20            | 0.555                          | 3084.49            | 1711.13            |
| A_68_P29614999 | chr14:55531847-55531891                           | NM_021551:101      | Slc22a17      | INSIDE                 | 0.938                                                        | 0.679                          | 1894.38            | 1287.19            | 0.637                          | 1647.96            | 1050.22            |
| A_68_P30964218 | chr16:91660311-91660368                           | NM_019973:12271    | Son           | INSIDE                 | 0.938                                                        | 3.343                          | 421.83             | 1410.38            | 3.137                          | 362.66             | 1137.51            |
| A_68_P26363428 | chr9:24578465-24578509                            | NM_194263:261      | Tbx20         | INSIDE                 | 0.938                                                        | 1.490                          | 1627.26            | 2424.94            | 1.397                          | 1295.62            | 1810.08            |
| A_68_P23240688 | chr4:118159059-118159103                          | NM_011587:3374     | Tie1          | INSIDE                 | 0.938                                                        | 2.368                          | 1221.78            | 2893.54            | 2.222                          | 997.05             | 2215.06            |
| A_68_P27056140 | chr10:34001966-34002010                           | NM_009433:-7       | Tspyl1        | PROMOTER               | 0.938                                                        | 1.563                          | 1500.06            | 2344.63            | 1.466                          | 1331.59            | 1951.57            |
| A_68_P27186305 | chr10:61949424-61949468                           | NM_001113355:-100  | Vps26a        | PROMOTER               | 0.938                                                        | 0.550                          | 1760.19            | 968.97             | 0.516                          | 1636.84            | 845.10             |
| A_68_P24424641 | chr6:47816485-47816534                            | NM_027477:30850    | Zfp398        | INSIDE                 | 0.938                                                        | 2.112                          | 455.96             | 962.78             | 1.981                          | 379.81             | 752.54             |
| A_68_P24424642 | chr6:47816553-47816601                            | NM_027477:30917    | Zfp398        | INSIDE                 | 0.938                                                        | 2.422                          | 373.19             | 903.88             | 2.273                          | 305.03             | 693.27             |
| A_68_P30796632 | chr16:59600772-59600816                           |                    | Unknown       |                        | 0.938                                                        | 3.041                          | 295.36             | 898.13             | 2.852                          | 286.72             | 817.81             |
| A_68_P24541219 | chr6:72297667-72297711                            | NM_026696:378      | 0610030E20Rik | INSIDE                 | 0.937                                                        | 0.668                          | 4380.83            | 2925.49            | 0.626                          | 3699.06            | 2314.44            |
| A_68_P30941181 | chr16:87699207-87699251                           | NM_007520:30       | Bach1         | INSIDE                 | 0.937                                                        | 0.725                          | 4884.89            | 3542.67            | 0.680                          | 4048.14            | 2751.72            |
| A_68_P27489857 | chr10:118677199-118677243                         | NM_027994:-109     | Cand1         | PROMOTER               | 0.937                                                        | 0.577                          | 1470.72            | 847.95             | 0.540                          | 1333.66            | 720.51             |
| A_68_P31125929 | chr17:29231859-29231903                           | NM_007669:1164     | Cdkn1a        | INSIDE                 | 0.937                                                        | 0.527                          | 1029.13            | 542.00             | 0.493                          | 822.09             | 405.52             |
| A_68_P27263123 | chr10:76077247-76077291                           | NM_146007:8881     | Col6a2        | INSIDE                 | 0.937                                                        | 2.296                          | 1694.67            | 3891.28            | 2.152                          | 1389.29            | 2990.21            |
| A_68_P26715672 | chr9:89949316-89949360                            | NM_007801:234      | Ctsh          | INSIDE                 | 0.937                                                        | 0.723                          | 2180.24            | 1576.89            | 0.678                          | 1842.92            | 1248.80            |
| A_68_P27271712 | chr10:77497354-77497398                           | NM_001081695:-7655 | Dnmt3l        | PROMOTER               | 0.937                                                        | 3.002                          | 1086.70            | 3261.85            | 2.812                          | 968.73             | 2724.14            |
| A_68_P25641011 | chr8:9207733-9207777                              | NM_173446:563269   | Fam155a       | INSIDE                 | 0.937                                                        | 3.319                          | 310.90             | 1031.91            | 3.109                          | 278.82             | 866.98             |
| A_68_P32241740 | chrX:7674050-7674094                              | NR_003632:-140     | Gm6787        | DIVERGENT_PROMOTER     | 0.937                                                        | 1.980                          | 1381.70            | 2735.60            | 1.856                          | 733.67             | 1361.36            |
| A_68_P29356808 | chr13:117099881-117099929                         | NM_021459:-8       | Isl1          | PROMOTER               | 0.937                                                        | 0.512                          | 1546.76            | 791.45             | 0.479                          | 1258.06            | 603.15             |
| A_68_P29054505 | chr13:55452830-55452879                           | NM_025828:11290    | Lman2         | INSIDE                 | 0.937                                                        | 2.208                          | 562.31             | 1241.77            | 2.070                          | 513.04             | 1062.09            |
| A_68_P24990780 | chr7:19576294-19576338                            | NM_145579:-277     | Mypop         | PROMOTER               | 0.937                                                        | 2.314                          | 374.98             | 867.62             | 2.169                          | 355.93             | 772.02             |
| A_68_P26824898 | chr9:110540931-110540975                          | NM_183276:15713    | Nbeal2        | INSIDE                 | 0.937                                                        | 1.873                          | 693.29             | 1298.55            | 1.755                          | 637.89             | 1119.29            |
| A_68_P31629941 | chr18:37926527-37926571                           | NM_033595:1315     | Pcdhga12      | INSIDE                 | 0.937                                                        | 1.884                          | 771.43             | 1453.18            | 1.765                          | 703.20             | 1241.41            |
| A_68_P31236181 | chr17:51952553-51952597                           | NM_001163630:-1195 | Satb1         | PROMOTER               | 0.937                                                        | 2.753                          | 402.23             | 1107.43            | 2.581                          | 394.86             | 1019.18            |
| A_68_P30979599 | chr16:94347306-94347350                           | NM_011377:261824   | Sim2          | INSIDE                 | 0.937                                                        | 3.122                          | 497.54             | 1553.49            | 2.927                          | 515.43             | 1508.75            |
| A_68_P22324940 | chr3:90193568-90193612                            | NM_011988:259      | Slc27a3       | INSIDE                 | 0.937                                                        | 2.306                          | 459.79             | 1060.23            | 2.160                          | 506.46             | 1094.18            |
| A_68_P28550370 | chr12:76919981-76920025                           | NM_001005510:698   | Syne2         | INSIDE                 | 0.937                                                        | 0.376                          | 2522.86            | 949.35             | 0.353                          | 2087.13            | 736.02             |
| A_68_P31926782 | chr19:5082847-5082891                             | NM_001001885:2609  | Tmem151a      | INSIDE                 | 0.937                                                        | 3.548                          | 882.26             | 3130.47            | 3.326                          | 808.60             | 2689.12            |
| A_68_P25393299 | chr7:112766364-112766408                          | NM_018880:15627    | Trim3         | INSIDE                 | 0.937                                                        | 2.642                          | 851.71             | 2250.06            | 2.476                          | 718.54             | 1778.87            |
| A_68_P32791134 | chrX:159266854-159266898                          | NM_178935:455      | Txlng         | INSIDE                 | 0.937                                                        | 2.277                          | 6885.64            | 15678.71           | 2.133                          | 3336.07            | 7114.19            |
| A_68_P24630035 | chr6:89785240-89785284                            | NM_053221:10269    | Vmn1r42       | DOWNSTREAM             | 0.937                                                        | 3.436                          | 600.88             | 2064.41            | 3.220                          | 554.95             | 1786.73            |
| A_68_P23244792 | chr4:118967244-118967289                          | NM_011732:-148     | Ybx1          | PROMOTER               | 0.937                                                        | 1.855                          | 3083.95            | 5719.25            | 1.737                          | 1938.79            | 3368.39            |
| A_68_P24118629 | chr5:136410508-136410552                          | NM_018871:-19      | Ywhag         | PROMOTER               | 0.937                                                        | 2.420                          | 1234.43            | 2987.44            | 2.267                          | 985.74             | 2234.22            |
| A_68_P25030073 | chr7:30928817-30928863                            | NM_001081007:21874 | Zfp382        | DOWNSTREAM             | 0.937                                                        | 3.328                          | 614.01             | 2043.25            | 3.119                          | 441.65             | 1377.62            |
| A_68_P24142834 | chr5:141180937-141180981                          | NM_172724:-18      | Baat1         | DIVERGENT_PROMOTER     | 0.936                                                        | 1.705                          | 2460.35            | 4194.40            | 1.596                          | 1895.74            | 3025.52            |
| A_68_P31158872 | chr17:35457951-35457995                           | NM_010390:470      | H2-Q1         | INSIDE                 | 0.936                                                        | 0.566                          | 1044.41            | 590.81             | 0.529                          | 918.60             | 486.28             |
| A_68_P27285763 | chr10:80298067-80298111                           | NM_001013758:8696  | Lingo3        | INSIDE                 | 0.936                                                        | 2.028                          | 638.15             | 1294.23            | 1.898                          | 564.92             | 1072.28            |
| A_68_P25031174 | chr7:31140698-31140742                            | NM_175478:7071     | Lrn3          | INSIDE                 | 0.936                                                        | 2.191                          | 464.69             | 1017.98            | 2.050                          | 428.31             | 878.23             |
| A_68_P24008162 | chr5:115607960-115608004                          | NM_175403:203      | Mlec          | INSIDE                 | 0.936                                                        | 2.904                          | 7081.42            | 20564.08           | 2.717                          | 5209.97            | 14154.52           |
| A_68_P27854122 | chr11:62270378-62270422                           | NM_011308:434      | Ncor1         | INSIDE                 | 0.936                                                        | 0.686                          | 2475.11            | 1697.00            | 0.642                          | 1891.41            | 1213.61            |
| A_68_P23253519 | chr4:120498120-120498164                          | NM_008692:178      | Nfyc          | INSIDE                 | 0.936                                                        | 0.647                          | 963.60             | 623.07             | 0.605                          | 831.37             | 502.91             |
| A_68_P28683723 | chr12:101962977-101963021                         | NM_153587:240      | Rps6ka5       | INSIDE                 | 0.936                                                        | 0.630                          | 1066.04            | 671.42             | 0.590                          | 909.81             | 536.44             |
| A_68_P26783276 | chr9:102911099-102911143                          | NM_033314:302      | Stco2a1       | INSIDE                 | 0.936                                                        | 0.589                          | 1020.16            | 601.37             | 0.552                          | 903.70             | 498.77             |

| ProbeName      | Target position of probe on CpG island microarray | TargetID               | GeneSymbol    | CpG island Description | Ratio of relative methylation (TiO <sub>2</sub> -NP/Vehicle) | Sham group                     |                    |                    | TiO <sub>2</sub> -H group      |                    |                    |
|----------------|---------------------------------------------------|------------------------|---------------|------------------------|--------------------------------------------------------------|--------------------------------|--------------------|--------------------|--------------------------------|--------------------|--------------------|
|                |                                                   |                        |               |                        |                                                              | Relative methylation (Cy5/Cy3) | Cy3 signal (Input) | Cy5 signal (MeDIP) | Relative methylation (Cy5/Cy3) | Cy3 signal (Input) | Cy5 signal (MeDIP) |
| A_68_P27098030 | chr10:42741219-42741263                           | NM_175407:153096       | Sobp          | INSIDE                 | 0.936                                                        | 5.340                          | 375.61             | 2005.75            | 4.998                          | 362.83             | 1813.31            |
| A_68_P28614749 | chr12:88541116-88541160                           | NM_001033475:41        | Tmed8         | INSIDE                 | 0.936                                                        | 2.255                          | 472.30             | 1065.01            | 2.110                          | 453.31             | 956.47             |
| A_68_P26894029 | chr9:123169283-123169327                          | NM_001002267:603       | Tmem158       | INSIDE                 | 0.936                                                        | 2.848                          | 821.54             | 2339.84            | 2.665                          | 868.02             | 2313.21            |
| A_68_P29260159 | chr13:99660900-99660944                           | NM_001048267:75        | Tnpol1        | INSIDE                 | 0.936                                                        | 1.803                          | 1558.28            | 2810.13            | 1.688                          | 1428.62            | 2410.99            |
| A_68_P27779788 | chr11:48567252-48567296                           | ENSMUST00000120566:-58 |               | PROMOTER               | 0.936                                                        | 2.510                          | 1291.20            | 3241.30            | 2.350                          | 1089.83            | 2560.82            |
| A_68_P24648069 | chr6:92893420-92893464                            | NR_015530:2867         | 9530026P05Rik | INSIDE                 | 0.935                                                        | 2.223                          | 648.74             | 1442.12            | 2.078                          | 649.95             | 1350.92            |
| A_68_P28731507 | chr12:110272513-110272557                         | NM_001163175:33893     | Begain        | INSIDE                 | 0.935                                                        | 1.815                          | 1673.06            | 3036.33            | 1.698                          | 1227.85            | 2084.55            |
| A_68_P28175417 | chr11:118898832-118898876                         | NM_013926:3373         | Cbx8          | DOWNSTREAM             | 0.935                                                        | 1.706                          | 1775.60            | 3028.48            | 1.595                          | 1676.58            | 2673.53            |
| A_68_P23343156 | chr4:137550305-137550349                          | NM_172703:942          | Eif4g3        | INSIDE                 | 0.935                                                        | 1.938                          | 527.20             | 1021.48            | 1.812                          | 402.54             | 729.51             |
| A_68_P23335793 | chr4:136326759-136326803                          | NM_010142:65070        | Ephb2         | INSIDE                 | 0.935                                                        | 2.346                          | 1211.20            | 2841.44            | 2.193                          | 1012.31            | 2219.81            |
| A_68_P22324052 | chr3:90035906-90035950                            | NM_206924:410          | Jtb           | INSIDE                 | 0.935                                                        | 1.731                          | 1141.67            | 1975.86            | 1.618                          | 940.23             | 1521.04            |
| A_68_P21842277 | chr2:168397045-168397089                          | NM_001136073:18625     | Nfatc2        | INSIDE                 | 0.935                                                        | 1.905                          | 620.83             | 1182.57            | 1.781                          | 499.77             | 890.31             |
| A_68_P24209922 | chr6:5248441-5248485                              | NM_183308:-89          | Pon2          | PROMOTER               | 0.935                                                        | 0.470                          | 3231.83            | 1519.48            | 0.439                          | 2566.20            | 1127.64            |
| A_68_P23974099 | chr5:109203826-109203870                          | NM_026109:20534        | Tmed11        | DOWNSTREAM             | 0.935                                                        | 2.850                          | 1603.10            | 4568.82            | 2.666                          | 1266.35            | 3375.87            |
| A_68_P26154297 | chr8:111474389-111474433                          | NM_007496:235869       | Zfxh3         | INSIDE                 | 0.935                                                        | 1.628                          | 1147.23            | 1867.33            | 1.522                          | 809.30             | 1232.06            |
| A_68_P24428349 | chr6:48570036-48570080                            | NM_173429:6880         | Zfp775        | INSIDE                 | 0.935                                                        | 1.984                          | 1028.78            | 2041.22            | 1.855                          | 703.44             | 1304.96            |
| A_68_P31461137 | chr18:4052694-4052738                             |                        |               | Unknown                | 0.935                                                        | 2.136                          | 793.43             | 1694.72            | 1.998                          | 711.94             | 1422.47            |
| A_68_P23999131 | chr5:114064213-114064257                          | NM_008153:36165        | Cmklr1        | INSIDE                 | 0.934                                                        | 5.924                          | 1827.40            | 10825.68           | 5.532                          | 1166.26            | 6451.88            |
| A_68_P31927966 | chr19:5307193-5307237                             | NM_001024717:8884      | Gal3st3       | INSIDE                 | 0.934                                                        | 1.984                          | 1127.02            | 2235.73            | 1.852                          | 899.33             | 1665.99            |
| A_68_P26804349 | chr9:106549876-106549920                          | NM_001160353:8542      | Grm2          | INSIDE                 | 0.934                                                        | 3.614                          | 2231.27            | 8064.18            | 3.377                          | 1690.72            | 5709.25            |
| A_68_P26346083 | chr9:21038393-21038437                            | NM_001110305:5362      | Keap1         | INSIDE                 | 0.934                                                        | 2.544                          | 1105.00            | 2811.50            | 2.376                          | 919.04             | 2183.83            |
| A_68_P25595364 | chr7:149718822-149718866                          | NM_011288:-177         | Mrpl23        | PROMOTER               | 0.934                                                        | 1.724                          | 6237.18            | 10749.81           | 1.609                          | 4530.69            | 7289.82            |
| A_68_P30346546 | chr15:76003525-76003570                           | NM_201394:22593        | Plec          | INSIDE                 | 0.934                                                        | 2.739                          | 704.59             | 1930.14            | 2.560                          | 676.47             | 1731.43            |
| A_68_P32467532 | chrX:71574336-71574380                            | NM_008883:-46          | Plxna3        | PROMOTER               | 0.934                                                        | 1.948                          | 691.33             | 1346.47            | 1.819                          | 358.24             | 651.48             |
| A_68_P25090600 | chr7:52262845-52262889                            | NM_001008422:8753      | Scaf1         | INSIDE                 | 0.934                                                        | 2.426                          | 1818.93            | 4413.07            | 2.267                          | 1230.69            | 2790.08            |
| A_68_P20354814 | chr1:75542871-75542915                            | NM_009208:52           | Slc4a3        | INSIDE                 | 0.934                                                        | 4.528                          | 2101.91            | 9518.27            | 4.228                          | 1820.53            | 7696.53            |
| A_68_P27355934 | chr10:93296766-93296810                           | NM_183199:2489         | Usp44         | INSIDE                 | 0.934                                                        | 0.552                          | 1809.82            | 999.40             | 0.516                          | 1590.17            | 820.14             |
| A_68_P27287690 | chr10:80607523-80607567                           | NM_010731:8529         | Zbtb7a        | INSIDE                 | 0.934                                                        | 2.216                          | 1502.36            | 3329.37            | 2.070                          | 1182.19            | 2447.57            |
| A_68_P24155560 | chr5:143997116-143997160                          | NM_177681:252          | Zfp12         | INSIDE                 | 0.934                                                        | 0.686                          | 1519.94            | 1042.31            | 0.641                          | 1238.68            | 793.61             |
| A_68_P25063505 | chr7:38555583-38555627                            | NM_172385:-833         | Zfp536        | PROMOTER               | 0.934                                                        | 0.725                          | 3633.79            | 2632.87            | 0.676                          | 3039.66            | 2056.33            |
| A_68_P28202317 | chr12:4775790-4775834                             | NM_175431:261          | A830093124Rik | INSIDE                 | 0.933                                                        | 1.687                          | 661.19             | 1115.10            | 1.574                          | 651.77             | 1025.80            |
| A_68_P23145841 | chr4:99382126-99382170                            | NM_001081264:-172      | Alg6          | PROMOTER               | 0.933                                                        | 0.698                          | 3490.44            | 2436.86            | 0.651                          | 2894.75            | 1884.59            |
| A_68_P30647300 | chr16:31430146-31430190                           | NM_001122683:1330      | Bdh1          | INSIDE                 | 0.933                                                        | 0.572                          | 1685.85            | 963.80             | 0.533                          | 1290.62            | 688.28             |
| A_68_P31096346 | chr17:24388277-24388321                           | NM_007634:56           | Cenf          | INSIDE                 | 0.933                                                        | 2.667                          | 523.87             | 1397.08            | 2.487                          | 511.19             | 1271.30            |
| A_68_P25272110 | chr7:88599409-88599453                            | NM_007755:132          | Cpeb1         | INSIDE                 | 0.933                                                        | 0.707                          | 1233.45            | 872.65             | 0.660                          | 1098.16            | 725.09             |
| A_68_P26165985 | chr8:113521608-113521652                          | NM_007916:93           | Ddx19a        | INSIDE                 | 0.933                                                        | 0.613                          | 1696.24            | 1039.05            | 0.572                          | 1386.22            | 792.50             |
| A_68_P26458701 | chr9:42752890-42752934                            | NM_175481:-458         | Grik4         | PROMOTER               | 0.933                                                        | 1.654                          | 1478.80            | 2446.64            | 1.543                          | 1277.31            | 1970.99            |
| A_68_P28751166 | chr12:113838256-113838300                         | NM_198411:11284        | Inf2          | INSIDE                 | 0.933                                                        | 2.107                          | 1940.99            | 4090.03            | 1.966                          | 1420.36            | 2791.97            |
| A_68_P28998905 | chr13:44998485-44998530                           | NM_001205043:171868    | Jarid2        | INSIDE                 | 0.933                                                        | 1.880                          | 625.81             | 1176.60            | 1.754                          | 509.95             | 894.22             |
| A_68_P25004550 | chr7:25162275-25162319                            | NM_001163510:7015      | Kenn4         | INSIDE                 | 0.933                                                        | 1.625                          | 1515.69            | 2463.23            | 1.517                          | 1195.10            | 1812.96            |
| A_68_P30422457 | chr15:88813275-88813319                           | NM_031260:-127         | Mov10l1       | DIVERGENT_PROMOTER     | 0.933                                                        | 2.528                          | 492.30             | 1244.42            | 2.358                          | 425.08             | 1002.55            |
| A_68_P31029176 | chr17:8995030-8995074                             | NM_011866:443          | Pde10a        | INSIDE                 | 0.933                                                        | 1.958                          | 2235.98            | 4378.14            | 1.827                          | 1809.79            | 3306.25            |
| A_68_P21911589 | chr2:181335871-181335915                          | NM_133701:-131         | Prpf6         | DIVERGENT_PROMOTER     | 0.933                                                        | 0.415                          | 1426.10            | 591.41             | 0.387                          | 1053.17            | 407.30             |
| A_68_P24090824 | chr5:130292894-130292938                          | NM_133900:213          | Psph          | INSIDE                 | 0.933                                                        | 0.445                          | 1349.08            | 599.96             | 0.415                          | 1179.34            | 489.59             |
| A_68_P26022784 | chr8:87469901-87469945                            | NM_144929:-967         | Rtbdn         | DIVERGENT_PROMOTER     | 0.933                                                        | 0.673                          | 1056.43            | 711.02             | 0.628                          | 927.78             | 582.88             |
| A_68_P27550650 | chr11:3093527-3093573                             | NM_030207:-84          | Sfi1          | DIVERGENT_PROMOTER     | 0.933                                                        | 1.890                          | 1565.66            | 2958.66            | 1.764                          | 1376.07            | 2427.19            |
| A_68_P23278806 | chr4:125879586-125879630                          | NM_146153:346          | Thrap3        | INSIDE                 | 0.933                                                        | 0.483                          | 2144.94            | 1036.48            | 0.451                          | 1968.26            | 887.61             |
| A_68_P31771010 | chr18:63852103-63852147                           | NM_016792:-111         | Txn1l         | PROMOTER               | 0.933                                                        | 0.627                          | 1325.06            | 830.80             | 0.585                          | 1097.23            | 642.18             |
| A_68_P21977355 | chr3:19794775-19794819                            | NR_027985:-74          | 463241L505Rik | PROMOTER               | 0.932                                                        | 0.579                          | 1746.18            | 1011.07            | 0.539                          | 1473.29            | 794.74             |
| A_68_P28182256 | chr11:119948049-119948093                         | NM_009734:71           | Azi1          | INSIDE                 | 0.932                                                        | 2.022                          | 479.20             | 968.95             | 1.884                          | 462.83             | 871.98             |
| A_68_P26156363 | chr8:111864572-111864616                          | NR_002928:214          | Gm1943        | INSIDE                 | 0.932                                                        | 1.848                          | 692.34             | 1279.78            | 1.723                          | 525.75             | 905.69             |

| ProbeName      | Target position of probe on CpG island microarray | TargetID                 | GeneSymbol    | CpG island Description | Ratio of relative methylation (TiO <sub>2</sub> -NP/Vehicle) | Sham group                     |                    |                    | TiO <sub>2</sub> -H group      |                    |                    |
|----------------|---------------------------------------------------|--------------------------|---------------|------------------------|--------------------------------------------------------------|--------------------------------|--------------------|--------------------|--------------------------------|--------------------|--------------------|
|                |                                                   |                          |               |                        |                                                              | Relative methylation (Cy5/Cy3) | Cy3 signal (Input) | Cy5 signal (MeDIP) | Relative methylation (Cy5/Cy3) | Cy3 signal (Input) | Cy5 signal (MeDIP) |
| A_68_P26804350 | chr9:106549989-106550033                          | NM_001160353:8430        | Grm2          | INSIDE                 | 0.932                                                        | 4.656                          | 2018.50            | 9397.18            | 4.339                          | 1393.34            | 6045.26            |
| A_68_P29628537 | chr14:58161247-58161291                           | NM_145837:17603          | Il17d         | INSIDE                 | 0.932                                                        | 1.992                          | 854.92             | 1702.76            | 1.857                          | 778.25             | 1445.41            |
| A_68_P32319267 | chrX:34137999-34138043                            | NM_016783:-199           | Pgrmc1        | PROMOTER               | 0.932                                                        | 1.816                          | 949.99             | 1725.34            | 1.693                          | 489.37             | 828.28             |
| A_68_P22825907 | chr4:33335613-33335657                            | NM_001033225:128         | Pnrc1         | INSIDE                 | 0.932                                                        | 0.537                          | 1116.26            | 599.04             | 0.500                          | 856.03             | 428.22             |
| A_68_P23373725 | chr4:142752302-142752346                          | NM_001081355:50288       | Prdm2         | INSIDE                 | 0.932                                                        | 0.401                          | 1598.97            | 640.41             | 0.373                          | 1364.42            | 509.43             |
| A_68_P31251406 | chr17:55621810-55621854                           | NM_172829:36818          | St6gal2       | INSIDE                 | 0.932                                                        | 3.147                          | 180.23             | 567.20             | 2.932                          | 193.92             | 568.55             |
| A_68_P29056640 | chr13:55819313-55819357                           | NM_175150:3324           | Txndc15       | INSIDE                 | 0.932                                                        | 2.212                          | 703.56             | 1556.21            | 2.062                          | 581.00             | 1198.22            |
| A_68_P29023550 | chr13:49243481-49243525                           | NM_029361:-119           | Wnk2          | PROMOTER               | 0.932                                                        | 1.551                          | 985.13             | 1528.36            | 1.446                          | 875.99             | 1266.83            |
| A_68_P21105204 | chr2:30640432-30640476                            | ENSMUST00000139968:18701 |               | DOWNSTREAM             | 0.932                                                        | 1.983                          | 782.44             | 1551.78            | 1.848                          | 749.69             | 1385.48            |
| A_68_P26559432 | chr9:60369799-60369843                            | ENSMUST00000140824:33    |               | INSIDE                 | 0.932                                                        | 3.850                          | 666.42             | 2566.04            | 3.589                          | 542.76             | 1947.87            |
| A_68_P24059291 | chr5:124545373-124545417                          | NM_019875:413            | Abcb9         | INSIDE                 | 0.931                                                        | 0.612                          | 1460.57            | 893.62             | 0.570                          | 1181.60            | 673.24             |
| A_68_P24925494 | chr6:145814701-145814745                          | NM_024469:-862           | Bhlhe41       | PROMOTER               | 0.931                                                        | 0.659                          | 2763.85            | 1820.61            | 0.614                          | 2089.35            | 1282.03            |
| A_68_P23397715 | chr4:148326702-148326746                          | NM_001159344:148224      | Cas2l         | INSIDE                 | 0.931                                                        | 0.597                          | 1184.56            | 707.77             | 0.556                          | 1037.62            | 576.89             |
| A_68_P31157314 | chr17:35196243-35196287                           | NM_001190449:285         | Ddah2         | INSIDE                 | 0.931                                                        | 1.471                          | 3333.08            | 4902.54            | 1.369                          | 2560.89            | 3505.95            |
| A_68_P25678286 | chr8:15027955-15027999                            | NM_029116:16952          | Kbtbd11       | INSIDE                 | 0.931                                                        | 1.887                          | 642.03             | 1211.62            | 1.757                          | 630.98             | 1108.63            |
| A_68_P29629403 | chr14:58310348-58310392                           | NM_015771:54590          | Lats2         | INSIDE                 | 0.931                                                        | 2.836                          | 1282.63            | 3637.22            | 2.641                          | 985.18             | 2601.76            |
| A_68_P25034848 | chr7:31852435-31852479                            | NM_144556:7503           | Lgi4          | INSIDE                 | 0.931                                                        | 3.337                          | 754.59             | 2518.40            | 3.107                          | 693.17             | 2153.84            |
| A_68_P23912412 | chr5:97821337-97821381                            | NM_001033191:-9          | Naa11         | PROMOTER               | 0.931                                                        | 3.327                          | 1216.16            | 4045.88            | 3.096                          | 1061.21            | 3285.11            |
| A_68_P22859777 | chr4:40918239-40918283                            | NM_023739:285            | Nfx1          | INSIDE                 | 0.931                                                        | 1.798                          | 497.02             | 893.71             | 1.674                          | 475.58             | 796.10             |
| A_68_P31862859 | chr18:80389409-80389453                           | NM_199197:7928           | Rbfa          | INSIDE                 | 0.931                                                        | 2.547                          | 525.61             | 1338.69            | 2.372                          | 416.05             | 986.71             |
| A_68_P24085131 | chr5:129287972-129288016                          | NM_001081388:171243      | Rimbp2        | INSIDE                 | 0.931                                                        | 2.217                          | 1299.57            | 2881.31            | 2.065                          | 1058.34            | 2185.31            |
| A_68_P29244710 | chr13:96901056-96901100                           | NM_029210:1454           | Sv2c          | INSIDE                 | 0.931                                                        | 0.654                          | 3816.22            | 2494.89            | 0.608                          | 3071.71            | 1868.66            |
| A_68_P30370136 | chr15:79922200-79922244                           | NM_009303:459            | Syng1         | INSIDE                 | 0.931                                                        | 0.521                          | 1226.39            | 639.08             | 0.485                          | 1012.89            | 491.51             |
| A_68_P24118489 | chr5:136387042-136387086                          | NM_018871:23447          | Ywhag         | INSIDE                 | 0.931                                                        | 1.985                          | 1221.53            | 2424.51            | 1.849                          | 816.05             | 1508.54            |
| A_68_P23590587 | chr5:34038039-34038083                            | AK172441:87326           |               | INSIDE                 | 0.931                                                        | 1.916                          | 856.24             | 1640.37            | 1.783                          | 841.39             | 1500.23            |
| A_68_P24513209 | chr6:65622803-65622847                            | NM_172399:1220           | A930038C07Rik | INSIDE                 | 0.930                                                        | 1.907                          | 1171.40            | 2234.16            | 1.773                          | 1043.11            | 1849.37            |
| A_68_P29050152 | chr13:54676736-54676780                           | NM_019968:385            | Ar110         | INSIDE                 | 0.930                                                        | 0.707                          | 1562.67            | 1104.27            | 0.657                          | 1288.45            | 847.01             |
| A_68_P22716231 | chr4:8679020-8679064                              | NM_001081417:60975       | Chd7          | INSIDE                 | 0.930                                                        | 2.694                          | 1432.17            | 3858.30            | 2.506                          | 1180.21            | 2958.14            |
| A_68_P33007790 | chr4_random:128337-128381                         | NM_001033326:18557       | Dhrsx         | INSIDE                 | 0.930                                                        | 3.315                          | 8590.18            | 28473.79           | 3.083                          | 6402.68            | 19739.27           |
| A_68_P20416040 | chr1:89052463-89052507                            | NM_021306:-882           | Ecel1         | PROMOTER               | 0.930                                                        | 1.703                          | 2901.99            | 4942.58            | 1.583                          | 2632.76            | 4168.89            |
| A_68_P27497201 | chr10:119851658-119851707                         | NM_010441:62309          | Hmga2         | INSIDE                 | 0.930                                                        | 4.452                          | 413.71             | 1841.97            | 4.142                          | 321.53             | 1331.82            |
| A_68_P23527252 | chr5:21181527-21181571                            | NM_178728:25615          | Napepld       | INSIDE                 | 0.930                                                        | 2.249                          | 1264.18            | 2843.54            | 2.093                          | 928.53             | 1943.21            |
| A_68_P28433223 | chr12:53198848-53198892                           | NM_029760:138            | Nubpl         | INSIDE                 | 0.930                                                        | 2.245                          | 1770.08            | 3973.89            | 2.087                          | 1560.57            | 3257.11            |
| A_68_P25021461 | chr7:29156631-29156675                            | NM_001083912:1029        | Plekkg2       | INSIDE                 | 0.930                                                        | 0.351                          | 1825.35            | 640.18             | 0.326                          | 1453.40            | 474.25             |
| A_68_P23374048 | chr4:142802256-142802300                          | NM_001081355:334         | Prdm2         | INSIDE                 | 0.930                                                        | 0.538                          | 1431.28            | 770.08             | 0.501                          | 1201.33            | 601.28             |
| A_68_P23232473 | chr4:116782119-116782163                          | NM_008958:13180          | Ptch2         | INSIDE                 | 0.930                                                        | 2.186                          | 926.65             | 2025.30            | 2.033                          | 800.17             | 1626.93            |
| A_68_P25090596 | chr7:52262461-52262505                            | NM_001008422:9137        | Scaf1         | INSIDE                 | 0.930                                                        | 2.752                          | 1095.77            | 3015.02            | 2.559                          | 862.57             | 2207.06            |
| A_68_P27259388 | chr10:75383953-75383997                           | NM_001161853:385         | Smarcb1       | INSIDE                 | 0.930                                                        | 1.947                          | 669.46             | 1303.24            | 1.811                          | 679.70             | 1230.63            |
| A_68_P31357836 | A_68_P31357836                                    |                          |               | Unknown                | 0.930                                                        | 0.736                          | 4229.64            | 3111.36            | 0.684                          | 3439.40            | 2353.71            |
| A_68_P27534320 | chr10:126602342-126602386                         | NM_027739:-522           | B4galnt1      | PROMOTER               | 0.929                                                        | 0.363                          | 1781.55            | 646.66             | 0.337                          | 1241.86            | 418.56             |
| A_68_P28743216 | chr12:112537725-112537769                         | NM_183016:78183          | Cdc42bbp      | INSIDE                 | 0.929                                                        | 2.500                          | 824.77             | 2061.80            | 2.322                          | 701.96             | 1630.17            |
| A_68_P26699344 | chr9:86361211-86361255                            | NM_177208:472            | Dopey1        | INSIDE                 | 0.929                                                        | 1.839                          | 831.39             | 1528.75            | 1.709                          | 764.75             | 1306.93            |
| A_68_P28069617 | chr11:100570105-100570149                         | NM_001038010:3655        | Kat2a         | INSIDE                 | 0.929                                                        | 3.539                          | 1048.39            | 3710.05            | 3.288                          | 958.51             | 3151.62            |
| A_68_P27281281 | chr10:79610845-79610889                           | NM_021565:-168           | Midn          | PROMOTER               | 0.929                                                        | 0.590                          | 1110.44            | 654.95             | 0.548                          | 830.43             | 454.82             |
| A_68_P26877097 | chr9:120213366-120213410                          | NM_144557:198            | Myrip         | INSIDE                 | 0.929                                                        | 0.546                          | 942.90             | 514.81             | 0.507                          | 826.47             | 419.10             |
| A_68_P27931785 | chr11:76212519-76212563                           | NM_008750:103            | Nxn           | INSIDE                 | 0.929                                                        | 1.568                          | 1469.67            | 2303.85            | 1.457                          | 1224.93            | 1784.29            |
| A_68_P24324978 | chr6:29121084-29121128                            | NM_001101443:8478        | Prrt4         | INSIDE                 | 0.929                                                        | 2.009                          | 875.60             | 1758.77            | 1.866                          | 818.63             | 1527.59            |
| A_68_P31924141 | chr19:4625447-4625491                             | NM_023131:149            | Rce1          | INSIDE                 | 0.929                                                        | 0.536                          | 1535.67            | 823.65             | 0.498                          | 1258.35            | 627.22             |
| A_68_P22342626 | chr3:94976422-94976466                            | NM_011351:8149           | Sema6c        | INSIDE                 | 0.929                                                        | 1.749                          | 1088.72            | 1904.39            | 1.625                          | 863.85             | 1403.55            |
| A_68_P20618599 | chr1:133859814-133859858                          | NM_145977:-7349          | Sle45a3       | PROMOTER               | 0.929                                                        | 1.697                          | 964.00             | 1636.14            | 1.576                          | 936.57             | 1476.01            |
| A_68_P30546007 | chr16:11066704-11066748                           | NM_009223:336            | Snn           | INSIDE                 | 0.929                                                        | 0.652                          | 1869.64            | 1218.92            | 0.606                          | 1336.51            | 809.76             |

| ProbeName      | Target position of probe on CpG island microarray | TargetID                 | GeneSymbol    | CpG island Description | Ratio of relative methylation (TiO <sub>2</sub> -NP/Vehicle) | Sham group                     |                    |                    | TiO <sub>2</sub> -H group      |                    |                    |
|----------------|---------------------------------------------------|--------------------------|---------------|------------------------|--------------------------------------------------------------|--------------------------------|--------------------|--------------------|--------------------------------|--------------------|--------------------|
|                |                                                   |                          |               |                        |                                                              | Relative methylation (Cy5/Cy3) | Cy3 signal (Input) | Cy5 signal (MeDIP) | Relative methylation (Cy5/Cy3) | Cy3 signal (Input) | Cy5 signal (MeDIP) |
| A_68_P30351139 | chr15:76741794-76741838                           | NM_001168276:14062       | Zfp647        | INSIDE                 | 0.929                                                        | 2.321                          | 725.82             | 1684.29            | 2.156                          | 593.98             | 1280.38            |
| A_68_P31256677 | chr17:56651893-56651937                           | NM_011483:-8             | Znr4f         | PROMOTER               | 0.929                                                        | 2.174                          | 382.88             | 832.54             | 2.019                          | 365.16             | 737.28             |
| A_68_P23498118 | chr5:15440585-15440629                            | NM_001110843:98          | Caena2d1      | INSIDE                 | 0.928                                                        | 2.072                          | 602.76             | 1249.19            | 1.923                          | 588.45             | 1131.86            |
| A_68_P27489859 | chr10:118677390-118677434                         | NM_027994:-301           | Cand1         | PROMOTER               | 0.928                                                        | 2.069                          | 740.55             | 1531.99            | 1.920                          | 574.47             | 1103.04            |
| A_68_P22318561 | chr3:89124750-89124794                            | NM_010108:2029           | Efna3         | INSIDE                 | 0.928                                                        | 0.668                          | 1025.98            | 685.77             | 0.620                          | 851.48             | 527.99             |
| A_68_P28924077 | chr13:31718533-31718577                           | NM_010225:870            | Foxf2         | INSIDE                 | 0.928                                                        | 0.496                          | 1489.10            | 738.07             | 0.460                          | 1143.83            | 526.10             |
| A_68_P32539665 | chrX:91881517-91881561                            | NM_008179:131            | Gspt2         | INSIDE                 | 0.928                                                        | 1.689                          | 1639.76            | 2769.73            | 1.567                          | 971.22             | 1522.34            |
| A_68_P21339292 | chr2:74584954-74584998                            | NM_010468:34927          | Hoxd3         | INSIDE                 | 0.928                                                        | 0.624                          | 3452.72            | 2153.79            | 0.579                          | 2887.64            | 1671.32            |
| A_68_P28060086 | chr11:98903124-98903168                           | NM_010517:573            | Igfbp4        | INSIDE                 | 0.928                                                        | 0.563                          | 993.45             | 559.50             | 0.523                          | 775.11             | 405.05             |
| A_68_P22540996 | chr3:132754802-132754846                          | NM_027927:-92            | Ints12        | DIVERGENT_PROMOTER     | 0.928                                                        | 0.517                          | 1457.16            | 752.89             | 0.480                          | 1148.49            | 550.95             |
| A_68_P30619233 | chr16:26105938-26105982                           | NM_173379:-90            | Leprel1       | PROMOTER               | 0.928                                                        | 1.709                          | 1075.12            | 1837.55            | 1.586                          | 946.38             | 1500.80            |
| A_68_P32024331 | chr19:24630850-24630894                           | NM_008846:-555           | Pip5k1b       | PROMOTER               | 0.928                                                        | 0.456                          | 1485.31            | 677.37             | 0.423                          | 1114.58            | 471.79             |
| A_68_P21395217 | chr2:84726953-84726997                            | NM_199223:-125           | Rtn4rl2       | PROMOTER               | 0.928                                                        | 2.484                          | 408.60             | 1014.77            | 2.305                          | 449.17             | 1035.33            |
| A_68_P27926564 | chr11:75329061-75329105                           | NM_001004157:2040        | Scarf1        | INSIDE                 | 0.928                                                        | 2.616                          | 981.75             | 2567.92            | 2.426                          | 735.34             | 1784.28            |
| A_68_P25661263 | chr8:12397648-12397692                            | NM_009233:2152           | Sox1          | INSIDE                 | 0.928                                                        | 0.677                          | 1109.99            | 751.95             | 0.628                          | 947.23             | 595.23             |
| A_68_P30296513 | chr15:67008341-67008385                           | NM_009177:82             | St3gal1       | INSIDE                 | 0.928                                                        | 0.665                          | 1619.75            | 1076.98            | 0.617                          | 1409.80            | 869.46             |
| A_68_P26154294 | chr8:111474065-111474109                          | NM_007496:235543         | Zfhx3         | INSIDE                 | 0.928                                                        | 2.331                          | 788.56             | 1838.29            | 2.164                          | 617.30             | 1335.93            |
| A_68_P20135161 | chr1:33871021-33871065                            | NM_133817:230            | Zfp451        | INSIDE                 | 0.928                                                        | 0.714                          | 2008.21            | 1433.43            | 0.662                          | 1487.99            | 985.37             |
| A_68_P25956909 | chr8:73985635-73985679                            | NM_022419:1900           | Abhd8         | INSIDE                 | 0.927                                                        | 2.496                          | 2338.73            | 5837.75            | 2.315                          | 1796.08            | 4157.61            |
| A_68_P29613379 | chr14:55250870-55250914                           | NM_199470:9309           | Cdh24         | INSIDE                 | 0.927                                                        | 1.651                          | 1360.45            | 2245.70            | 1.531                          | 1158.87            | 1773.77            |
| A_68_P29241611 | chr13:96388009-96388053                           | NM_010169:358            | F2r           | INSIDE                 | 0.927                                                        | 0.543                          | 1303.58            | 708.17             | 0.504                          | 1181.02            | 595.02             |
| A_68_P27897169 | chr11:69615077-69615121                           | NM_010198:29             | Fgf11         | INSIDE                 | 0.927                                                        | 0.651                          | 1935.64            | 1260.82            | 0.604                          | 1357.33            | 819.78             |
| A_68_P21091204 | chr2:28302022-28302066                            | NM_001005420:-1416       | Gm347         | PROMOTER               | 0.927                                                        | 0.715                          | 1716.94            | 1227.65            | 0.663                          | 1625.41            | 1076.85            |
| A_68_P25004864 | chr7:25218003-25218050                            | NM_199013:12675          | Irgc1         | INSIDE                 | 0.927                                                        | 2.427                          | 637.91             | 1548.09            | 2.249                          | 502.25             | 1129.74            |
| A_68_P26644019 | chr9:75289708-75289753                            | NM_001039522:400         | Leo1          | INSIDE                 | 0.927                                                        | 2.108                          | 671.27             | 1414.83            | 1.954                          | 588.84             | 1150.66            |
| A_68_P22878699 | chr4:44723813-44723857                            | NM_008782:-522           | Pax5          | PROMOTER               | 0.927                                                        | 0.628                          | 1207.35            | 757.62             | 0.582                          | 984.37             | 572.80             |
| A_68_P25377918 | chr7:109399091-109399135                          | NM_019566:-480           | Rhog          | PROMOTER               | 0.927                                                        | 1.740                          | 1309.38            | 2278.08            | 1.612                          | 989.03             | 1594.61            |
| A_68_P21843353 | chr2:168581710-168581754                          | NM_175303:10969          | Sall4         | INSIDE                 | 0.927                                                        | 2.251                          | 288.60             | 649.77             | 2.086                          | 270.97             | 565.35             |
| A_68_P30348872 | chr15:76349910-76349954                           | NM_130893:2627           | Sert1         | INSIDE                 | 0.927                                                        | 2.304                          | 1037.55            | 2390.39            | 2.136                          | 935.21             | 1997.37            |
| A_68_P26885414 | chr9:121671950-121671994                          | NM_001166644:2822        | Zfp651        | INSIDE                 | 0.927                                                        | 2.660                          | 602.31             | 1602.43            | 2.467                          | 441.37             | 1088.84            |
| A_68_P29308209 | chr13:108681343-108681387                         | NM_145456:-1106          | Zswim6        | PROMOTER               | 0.927                                                        | 1.590                          | 963.81             | 1532.68            | 1.475                          | 822.39             | 1212.89            |
| A_68_P32473670 | chrX:73211772-73211816                            | ENSMUST00000121090:-7487 |               | PROMOTER               | 0.927                                                        | 1.530                          | 2064.85            | 3159.89            | 1.419                          | 1011.59            | 1434.99            |
| A_68_P21901912 | chr2:179906060-179906104                          | NM_019822:-210           | Adrm1         | PROMOTER               | 0.926                                                        | 3.610                          | 757.83             | 2735.99            | 3.341                          | 669.25             | 2236.27            |
| A_68_P27899784 | chr11:70068702-70068746                           | NM_007440:119            | Alox12        | INSIDE                 | 0.926                                                        | 0.627                          | 1208.42            | 758.19             | 0.581                          | 1002.89            | 582.54             |
| A_68_P29056517 | chr13:55794620-55794664                           | NM_181278:158            | B230219D22Rik | INSIDE                 | 0.926                                                        | 1.805                          | 391.42             | 706.59             | 1.671                          | 477.72             | 798.38             |
| A_68_P26221735 | chr8:123191978-123192022                          | NM_010926:12             | Cox4nb        | INSIDE                 | 0.926                                                        | 0.674                          | 1815.53            | 1223.91            | 0.625                          | 1463.23            | 913.79             |
| A_68_P24602880 | chr6:85019421-85019465                            | NM_177077:65             | Exoc6b        | INSIDE                 | 0.926                                                        | 1.706                          | 1531.81            | 2613.24            | 1.579                          | 1418.22            | 2239.40            |
| A_68_P25835331 | chr8:47377554-47377598                            | NM_173789:2449           | Helt          | INSIDE                 | 0.926                                                        | 2.060                          | 1321.32            | 2721.37            | 1.907                          | 1003.71            | 1914.36            |
| A_68_P26258434 | chr8:129118421-129118465                          | NM_001164598:-1106       | Irf2bp2       | PROMOTER               | 0.926                                                        | 2.005                          | 609.11             | 1221.10            | 1.857                          | 550.31             | 1021.94            |
| A_68_P29054504 | chr13:55452758-55452802                           | NM_025828:11364          | Lman2         | INSIDE                 | 0.926                                                        | 2.259                          | 732.69             | 1655.06            | 2.091                          | 598.16             | 1250.98            |
| A_68_P27787411 | chr11:50039460-50039504                           | NM_145926:646            | Mgat4b        | INSIDE                 | 0.926                                                        | 5.290                          | 410.60             | 2172.16            | 4.897                          | 343.75             | 1683.29            |
| A_68_P29044154 | chr13:53571404-53571448                           | NM_013601:-3277          | Msx2          | PROMOTER               | 0.926                                                        | 1.539                          | 3706.05            | 5702.14            | 1.425                          | 3328.32            | 4743.76            |
| A_68_P25954893 | chr8:73437576-73437620                            | NM_173013:7726           | Mtap1s        | INSIDE                 | 0.926                                                        | 3.681                          | 528.86             | 1946.62            | 3.407                          | 419.85             | 1430.30            |
| A_68_P26991388 | chr10:20880481-20880525                           | NM_001198914:288         | Myb           | INSIDE                 | 0.926                                                        | 1.571                          | 985.08             | 1548.04            | 1.455                          | 930.29             | 1353.33            |
| A_68_P20189690 | chr1:43610952-43610996                            | NM_010879:108379         | Neck2         | INSIDE                 | 0.926                                                        | 1.909                          | 809.49             | 1545.16            | 1.767                          | 636.36             | 1124.56            |
| A_68_P28621835 | chr12:90498748-90498792                           | NM_172544:306937         | Nrxn3         | INSIDE                 | 0.926                                                        | 2.186                          | 1067.40            | 2333.15            | 2.023                          | 884.84             | 1790.11            |
| A_68_P22309972 | chr3:87587929-87587973                            | NM_001033124:11134       | Ntrk1         | INSIDE                 | 0.926                                                        | 3.167                          | 1827.72            | 5788.41            | 2.932                          | 1500.15            | 4398.10            |
| A_68_P30346561 | chr15:76005231-76005275                           | NM_201394:20888          | Plec          | INSIDE                 | 0.926                                                        | 2.334                          | 1017.33            | 2373.96            | 2.161                          | 788.14             | 1702.87            |
| A_68_P24324924 | chr6:29114488-29114532                            | NM_133925:214            | Rbm28         | INSIDE                 | 0.926                                                        | 0.629                          | 3325.73            | 2091.72            | 0.582                          | 2489.29            | 1449.67            |
| A_68_P24428219 | chr6:48547191-48547235                            | NM_001079901:3331        | Repin1        | INSIDE                 | 0.926                                                        | 2.259                          | 1449.45            | 3274.75            | 2.092                          | 1083.81            | 2267.57            |
| A_68_P32694935 | chrX:136145294-136145338                          | NM_023270:158            | Rnf128        | INSIDE                 | 0.926                                                        | 3.100                          | 899.92             | 2789.55            | 2.871                          | 675.38             | 1938.79            |

| ProbeName      | Target position of probe on CpG island microarray | TargetID                 | GeneSymbol    | CpG island Description | Ratio of relative methylation (TiO <sub>2</sub> -NP/Vehicle) | Sham group                     |                    |                    | TiO <sub>2</sub> -H group      |                    |                    |
|----------------|---------------------------------------------------|--------------------------|---------------|------------------------|--------------------------------------------------------------|--------------------------------|--------------------|--------------------|--------------------------------|--------------------|--------------------|
|                |                                                   |                          |               |                        |                                                              | Relative methylation (Cy5/Cy3) | Cy3 signal (Input) | Cy5 signal (MeDIP) | Relative methylation (Cy5/Cy3) | Cy3 signal (Input) | Cy5 signal (MeDIP) |
| A_68_P24604452 | chr6:85283101-85283145                            | NM_178639:294            | Sfxn5         | INSIDE                 | 0.926                                                        | 0.643                          | 875.11             | 562.71             | 0.595                          | 756.02             | 450.19             |
| A_68_P28151703 | chr11:115025252-115025296                         | NM_012030:620            | Sle9a3r1      | INSIDE                 | 0.926                                                        | 0.600                          | 1635.43            | 981.75             | 0.556                          | 1136.03            | 631.70             |
| A_68_P25183829 | chr7:72789715-72789759                            | NM_172310:-47            | Tarsl2        | PROMOTER               | 0.926                                                        | 2.044                          | 13789.93           | 28181.66           | 1.892                          | 9572.49            | 18111.79           |
| A_68_P21105306 | chr2:30656954-30656998                            | NM_198000:251            | 1700001O22Rik | INSIDE                 | 0.925                                                        | 2.505                          | 2026.51            | 5076.77            | 2.316                          | 1721.46            | 3987.51            |
| A_68_P27033724 | chr10:28916766-28916810                           | NM_026138:52987          | 6330407J23Rik | INSIDE                 | 0.925                                                        | 2.092                          | 1805.80            | 3777.61            | 1.936                          | 1478.82            | 2862.56            |
| A_68_P30371903 | chr15:80202683-80202727                           | NM_001044308:85037       | Caena1i       | INSIDE                 | 0.925                                                        | 2.667                          | 998.46             | 2662.87            | 2.468                          | 786.47             | 1941.09            |
| A_68_P20910363 | chr1:188791777-188791821                          | NM_033077:504            | D1Pas1        | INSIDE                 | 0.925                                                        | 1.733                          | 689.41             | 1194.66            | 1.604                          | 577.34             | 925.83             |
| A_68_P20149760 | chr1:36739833-36739877                            | NM_001126046:174         | Fam178b       | INSIDE                 | 0.925                                                        | 2.814                          | 1267.41            | 3566.45            | 2.602                          | 1126.79            | 2932.09            |
| A_68_P31927961 | chr19:5306691-5306735                             | NM_001024717:8382        | Gal3st3       | INSIDE                 | 0.925                                                        | 2.240                          | 1301.78            | 2915.80            | 2.073                          | 1039.13            | 2153.91            |
| A_68_P21874743 | chr2:174152892-174152936                          | NR_003258:-500           | Gnas          | PROMOTER               | 0.925                                                        | 3.703                          | 4265.92            | 15798.12           | 3.427                          | 2818.28            | 9657.38            |
| A_68_P21339005 | chr2:74550245-74550289                            | NM_010468:217            | Hoxd3         | INSIDE                 | 0.925                                                        | 0.601                          | 2203.74            | 1323.68            | 0.556                          | 1732.19            | 962.30             |
| A_68_P27865441 | chr11:64249280-64249324                           | NM_178870:469            | Hs3st3a1      | INSIDE                 | 0.925                                                        | 0.549                          | 1280.62            | 703.58             | 0.508                          | 985.05             | 500.45             |
| A_68_P26258420 | chr8:129116753-129116797                          | NM_001164598:562         | Irf2bp2       | INSIDE                 | 0.925                                                        | 1.589                          | 1252.23            | 1989.99            | 1.471                          | 1071.28            | 1575.59            |
| A_68_P24428220 | chr6:48547266-48547310                            | NM_001079901:3407        | Repin1        | INSIDE                 | 0.925                                                        | 2.499                          | 661.65             | 1653.19            | 2.310                          | 576.30             | 1331.30            |
| A_68_P21081267 | chr2:26788591-26788635                            | NM_011512:419            | Surf4         | INSIDE                 | 0.925                                                        | 0.675                          | 1431.85            | 965.83             | 0.624                          | 1350.10            | 842.51             |
| A_68_P31950560 | chr19:10500789-10500833                           | NM_018801:37231          | Syt7          | INSIDE                 | 0.925                                                        | 1.812                          | 1635.94            | 2963.67            | 1.675                          | 1198.81            | 2008.51            |
| A_68_P26883519 | chr9:121363673-121363717                          | NM_175114:87619          | Trak1         | INSIDE                 | 0.925                                                        | 2.819                          | 989.40             | 2788.91            | 2.608                          | 705.00             | 1838.77            |
| A_68_P27466130 | chr10:114238213-114238257                         | NM_146241:192            | Trhd6         | INSIDE                 | 0.925                                                        | 0.675                          | 1117.27            | 754.17             | 0.624                          | 895.70             | 559.19             |
| A_68_P26513689 | chr9:51976512-51976556                            | NM_001162921:-318        | Zc3h12c       | PROMOTER               | 0.925                                                        | 2.048                          | 839.46             | 1719.39            | 1.895                          | 710.91             | 1347.18            |
| A_68_P26238819 | chr8:125778613-125778657                          | NM_020497:540            | Zfp276        | INSIDE                 | 0.925                                                        | 0.601                          | 1523.49            | 915.89             | 0.556                          | 1187.33            | 660.04             |
| A_68_P23253637 | chr4:120527431-120527475                          | ENSMUST00000106283:-6929 |               | PROMOTER               | 0.925                                                        | 1.768                          | 1223.90            | 2163.39            | 1.635                          | 1053.28            | 1722.40            |
| A_68_P32151687 | chr19:47805901-47805945                           | NM_026377:-323           | 6330577E15Rik | PROMOTER               | 0.924                                                        | 0.610                          | 1914.37            | 1167.07            | 0.563                          | 1715.17            | 966.13             |
| A_68_P28053987 | chr11:97883567-97883611                           | NM_001159320:-3902       | Caenb1        | PROMOTER               | 0.924                                                        | 0.549                          | 1904.28            | 1044.56            | 0.507                          | 1410.05            | 714.97             |
| A_68_P27563899 | chr11:5441997-5442041                             | NM_134033:202            | Ccdc117       | INSIDE                 | 0.924                                                        | 1.617                          | 915.50             | 1480.74            | 1.495                          | 799.03             | 1194.48            |
| A_68_P26844379 | chr9:114294023-114294067                          | NM_019922:5786           | Crtap         | INSIDE                 | 0.924                                                        | 1.663                          | 982.86             | 1634.68            | 1.537                          | 846.08             | 1300.38            |
| A_68_P28170155 | chr11:118108984-118109028                         | NM_001112699:900         | Cytl1         | INSIDE                 | 0.924                                                        | 0.568                          | 1606.36            | 911.99             | 0.525                          | 1191.10            | 624.81             |
| A_68_P31794503 | chr18:68093621-68093666                           | NM_172631:733            | D18Ertd653e   | INSIDE                 | 0.924                                                        | 1.920                          | 1540.79            | 2958.23            | 1.774                          | 1194.60            | 2119.18            |
| A_68_P31058441 | chr17:14340236-14340280                           | NM_172826:580            | Dact2         | INSIDE                 | 0.924                                                        | 0.624                          | 1288.87            | 803.71             | 0.576                          | 1079.74            | 622.11             |
| A_68_P22019077 | chr3:28680006-28680050                            | NM_177586:-204           | Eif5a2        | PROMOTER               | 0.924                                                        | 0.492                          | 1295.33            | 637.57             | 0.455                          | 1061.91            | 482.74             |
| A_68_P28940412 | chr13:34838589-34838633                           | NM_138746:7100           | Fam50b        | INSIDE                 | 0.924                                                        | 2.203                          | 651.73             | 1435.87            | 2.037                          | 544.01             | 1107.91            |
| A_68_P27093485 | chr10:41917381-41917425                           | NM_019740:79146          | Foxo3         | INSIDE                 | 0.924                                                        | 1.936                          | 2076.54            | 4020.95            | 1.790                          | 1616.27            | 2893.07            |
| A_68_P20969135 | chr2:4525120-4525164                              | NM_001177844:44343       | Frmtd4a       | INSIDE                 | 0.924                                                        | 2.158                          | 1092.22            | 2356.97            | 1.993                          | 983.41             | 1960.07            |
| A_68_P22204191 | chr3:66024790-66024834                            | NM_008987:1004           | Ptx3          | INSIDE                 | 0.924                                                        | 2.248                          | 411.46             | 924.91             | 2.077                          | 392.56             | 815.37             |
| A_68_P21116405 | chr2:32470425-32470469                            | NM_001025310:7966        | St6galnac6    | INSIDE                 | 0.924                                                        | 2.819                          | 1322.82            | 3729.64            | 2.605                          | 1030.62            | 2684.68            |
| A_68_P23337641 | chr4:136604483-136604527                          | NM_198248:106            | Zbtb40        | INSIDE                 | 0.924                                                        | 2.449                          | 759.46             | 1860.03            | 2.262                          | 671.94             | 1519.87            |
| A_68_P21775102 | chr2:156905117-156905161                          | NM_001164663:-137        | 9830001H06Rik | DIVERGENT_PROMOTER     | 0.923                                                        | 1.567                          | 1177.07            | 1844.63            | 1.446                          | 1140.98            | 1649.65            |
| A_68_P26466976 | chr9:44127791-44127835                            | NM_027909:553            | C2cd2l        | INSIDE                 | 0.923                                                        | 0.421                          | 1601.40            | 673.48             | 0.388                          | 1416.07            | 549.95             |
| A_68_P26140463 | chr8:109127687-109127731                          | NM_009864:441            | Cdh1          | INSIDE                 | 0.923                                                        | 2.015                          | 777.32             | 1566.55            | 1.860                          | 679.54             | 1263.96            |
| A_68_P21144179 | chr2:37648980-37649024                            | NM_001163566:17234       | Crb2          | INSIDE                 | 0.923                                                        | 1.520                          | 1714.39            | 2605.17            | 1.402                          | 1444.54            | 2025.88            |
| A_68_P26885587 | chr9:121697963-121698007                          | NR_027967:2254           | Hhatl         | INSIDE                 | 0.923                                                        | 2.123                          | 346.73             | 736.06             | 1.960                          | 310.70             | 608.94             |
| A_68_P21840386 | chr2:168088202-168088246                          | NM_001081134:6607        | Keng1         | INSIDE                 | 0.923                                                        | 1.912                          | 410.37             | 784.49             | 1.764                          | 397.74             | 701.74             |
| A_68_P23297927 | chr4:129349792-129349836                          | NM_008468:197            | Kpna6         | INSIDE                 | 0.923                                                        | 0.456                          | 2193.16            | 999.59             | 0.421                          | 1728.92            | 727.21             |
| A_68_P23264336 | chr4:123364187-123364231                          | NM_001199136:-2605       | Macf1         | PROMOTER               | 0.923                                                        | 0.647                          | 880.14             | 569.05             | 0.597                          | 781.60             | 466.56             |
| A_68_P23542978 | chr5:24108266-24108310                            | NM_025891:-468           | Smardc3       | PROMOTER               | 0.923                                                        | 2.188                          | 676.38             | 1480.03            | 2.020                          | 578.55             | 1168.40            |
| A_68_P20005806 | chr1:4483262-4483306                              | NM_011441:3210           | Sox17         | INSIDE                 | 0.923                                                        | 0.554                          | 1089.43            | 604.00             | 0.512                          | 873.68             | 447.25             |
| A_68_P27502796 | chr10:120748000-120748044                         | NM_029057:223            | Tbc1d30       | INSIDE                 | 0.923                                                        | 0.576                          | 918.78             | 528.83             | 0.531                          | 838.23             | 445.13             |
| A_68_P26564384 | chr9:61220668-61220712                            | NM_001083927:518         | Tle3          | INSIDE                 | 0.923                                                        | 0.685                          | 2351.62            | 1611.64            | 0.633                          | 1823.98            | 1154.16            |
| A_68_P26373639 | chr9:26837630-26837674                            | NM_178027:27             | Vps26b        | INSIDE                 | 0.923                                                        | 0.693                          | 1163.43            | 806.21             | 0.640                          | 1047.73            | 670.29             |
| A_68_P24994121 | chr7:20163073-20163117                            | NM_022409:459            | Zfp296        | INSIDE                 | 0.923                                                        | 0.624                          | 1155.04            | 720.23             | 0.576                          | 953.90             | 549.13             |
| A_68_P29477473 | chr14:26277283-26277327                           | NM_183208:-1366          | Zmiz1         | PROMOTER               | 0.923                                                        | 0.536                          | 1061.53            | 569.14             | 0.495                          | 909.18             | 450.08             |
| A_68_P23990398 | chr5:112583018-112583062                          | AK006010:-2216           |               | PROMOTER               | 0.923                                                        | 0.662                          | 1508.11            | 998.75             | 0.611                          | 1096.29            | 670.34             |



| ProbeName      | Target position of probe on CpG island microarray | TargetID              | GeneSymbol    | CpG island Description | Ratio of relative methylation (TiO <sub>2</sub> -NP/Vehicle) | Sham group                     |                    |                    | TiO <sub>2</sub> -H group      |                    |                    |
|----------------|---------------------------------------------------|-----------------------|---------------|------------------------|--------------------------------------------------------------|--------------------------------|--------------------|--------------------|--------------------------------|--------------------|--------------------|
|                |                                                   |                       |               |                        |                                                              | Relative methylation (Cy5/Cy3) | Cy3 signal (Input) | Cy5 signal (MeDIP) | Relative methylation (Cy5/Cy3) | Cy3 signal (Input) | Cy5 signal (MeDIP) |
| A_68_P24127507 | chr5:138220239-138220283                          | NM_027242:115         | 2010007H12Rik | INSIDE                 | 0.922                                                        | 0.600                          | 1014.62            | 608.72             | 0.553                          | 967.60             | 535.52             |
| A_68_P28083320 | chr11:102962675-102962719                         | NM_152813:276         | Plcd3         | INSIDE                 | 0.922                                                        | 0.649                          | 1279.19            | 830.60             | 0.598                          | 1018.30            | 609.38             |
| A_68_P29055171 | chr13:55565839-55565883                           | NM_001030296:233      | Prr7          | INSIDE                 | 0.922                                                        | 0.514                          | 1205.22            | 619.86             | 0.474                          | 1011.87            | 479.77             |
| A_68_P31868008 | chr18:81171137-81171181                           | NM_178280:12159       | Sall3         | INSIDE                 | 0.922                                                        | 2.704                          | 724.41             | 1958.57            | 2.492                          | 821.88             | 2047.98            |
| A_68_P27631988 | chr11:20443335-20443379                           | NM_021372:101         | Sertad2       | INSIDE                 | 0.922                                                        | 1.936                          | 4953.85            | 9591.84            | 1.785                          | 3999.43            | 7138.26            |
| A_68_P21901054 | chr2:179777765-179777809                          | NM_178750:599         | Ss18l1        | INSIDE                 | 0.922                                                        | 2.119                          | 1100.80            | 2333.01            | 1.954                          | 931.45             | 1819.68            |
| A_68_P28037690 | chr11:95120921-95120965                           | NM_053093:-1900       | Tac4          | PROMOTER               | 0.922                                                        | 2.320                          | 653.20             | 1515.62            | 2.140                          | 608.61             | 1302.34            |
| A_68_P24427168 | chr6:48388705-48388749                            | NM_001085415:6363     | Zfp467        | INSIDE                 | 0.922                                                        | 1.820                          | 2146.73            | 3907.02            | 1.678                          | 1664.83            | 2793.47            |
| A_68_P23470208 | chr5:8912735-8912783                              | NM_008830:19038       | Abcb4         | INSIDE                 | 0.921                                                        | 3.070                          | 683.03             | 2096.73            | 2.827                          | 568.93             | 1608.38            |
| A_68_P20395058 | chr1:82836029-82836073                            | NM_010472:-7          | Agfg1         | PROMOTER               | 0.921                                                        | 2.685                          | 501.22             | 1345.70            | 2.472                          | 466.34             | 1152.64            |
| A_68_P28859760 | chr13:19040273-19040317                           | NM_175007:55          | Amph          | INSIDE                 | 0.921                                                        | 0.646                          | 900.90             | 581.85             | 0.595                          | 743.02             | 442.05             |
| A_68_P31932937 | chr19:6141281-6141325                             | NM_019722:-165        | Arl2          | PROMOTER               | 0.921                                                        | 3.505                          | 455.29             | 1595.64            | 3.229                          | 409.41             | 1321.83            |
| A_68_P28731505 | chr12:110272292-110272336                         | NM_001163175:34113    | Begain        | INSIDE                 | 0.921                                                        | 2.646                          | 811.72             | 2147.78            | 2.438                          | 730.43             | 1780.89            |
| A_68_P31103374 | chr17:25522637-25522681                           | NM_001163691:48070    | Caena1h       | INSIDE                 | 0.921                                                        | 2.261                          | 1944.76            | 4396.13            | 2.081                          | 1563.35            | 3253.84            |
| A_68_P24114171 | chr5:135462844-135462888                          | NM_009902:783         | Cldn3         | INSIDE                 | 0.921                                                        | 1.729                          | 2960.72            | 5119.20            | 1.593                          | 2373.01            | 3780.02            |
| A_68_P22398586 | chr3:105490205-105490249                          | NM_017397:263         | Ddx20         | INSIDE                 | 0.921                                                        | 2.017                          | 392.44             | 791.43             | 1.857                          | 423.60             | 786.51             |
| A_68_P25957754 | chr8:74126853-74126897                            | NM_001166213:5330     | Fam129c       | INSIDE                 | 0.921                                                        | 2.138                          | 12168.65           | 26011.80           | 1.969                          | 8217.01            | 16177.09           |
| A_68_P31123770 | chr17:28829032-28829076                           | NM_001168513:-458     | Mapk14        | PROMOTER               | 0.921                                                        | 0.641                          | 1683.02            | 1078.68            | 0.590                          | 1428.15            | 843.26             |
| A_68_P25025269 | chr7:29871316-29871362                            | NR_035489:-2625       | Mir1963       | PROMOTER               | 0.921                                                        | 3.396                          | 613.42             | 2083.33            | 3.129                          | 507.96             | 1589.35            |
| A_68_P21722744 | chr2:147011624-147011668                          | NM_001077632:492      | Nkx2-2        | INSIDE                 | 0.921                                                        | 1.968                          | 727.42             | 1431.29            | 1.813                          | 595.33             | 1079.31            |
| A_68_P32218816 | chr19:59419677-59419721                           | NM_001033222:572      | Pdzd8         | INSIDE                 | 0.921                                                        | 0.523                          | 1170.46            | 611.96             | 0.481                          | 929.73             | 447.62             |
| A_68_P23593814 | chr5:34679655-34679699                            | NM_011278:638         | Rnf4          | INSIDE                 | 0.921                                                        | 0.482                          | 1158.62            | 559.03             | 0.444                          | 1094.18            | 485.99             |
| A_68_P24320418 | chr6:28429971-28430015                            | NM_019776:-355        | Snd1          | PROMOTER               | 0.921                                                        | 0.612                          | 904.85             | 553.79             | 0.564                          | 814.37             | 458.93             |
| A_68_P32562268 | chrX:98255023-98255069                            | NM_031384:-68         | Tex11         | PROMOTER               | 0.921                                                        | 2.023                          | 1132.45            | 2290.77            | 1.862                          | 442.25             | 823.68             |
| A_68_P27845262 | chr11:60691840-60691884                           | NM_001168507:678      | Tmem11        | INSIDE                 | 0.921                                                        | 0.622                          | 3974.17            | 2471.33            | 0.573                          | 3224.08            | 1846.28            |
| A_68_P22889233 | chr4:46548820-46548864                            | NM_029077:174         | Trim14        | INSIDE                 | 0.921                                                        | 1.728                          | 1082.48            | 1870.15            | 1.591                          | 913.12             | 1452.64            |
| A_68_P24836602 | chr6:127984334-127984378                          | NM_175414:109240      | Tspan9        | INSIDE                 | 0.921                                                        | 1.910                          | 1058.84            | 2022.13            | 1.759                          | 943.96             | 1660.64            |
| A_68_P29256602 | chr13:99032998-99033042                           | NM_178918:-73         | Utp15         | DIVERGENT_PROMOTER     | 0.921                                                        | 1.797                          | 514.75             | 925.17             | 1.655                          | 497.54             | 823.52             |
| A_68_P32977629 | A_68_P32977629                                    |                       | Unknown       |                        | 0.921                                                        | 2.962                          | 2336.85            | 6921.36            | 2.728                          | 1541.95            | 4207.14            |
| A_68_P28092301 | chr11:104547023-104547067                         | ENSMUST00000148007:24 |               | INSIDE                 | 0.921                                                        | 1.836                          | 938.30             | 1723.10            | 1.692                          | 867.86             | 1468.51            |
| A_68_P28574820 | chr12:81360887-81360931                           | NM_134156:450         | Actn1         | INSIDE                 | 0.920                                                        | 1.792                          | 1836.91            | 3291.99            | 1.648                          | 1515.90            | 2498.01            |
| A_68_P24325868 | chr6:29297894-29297938                            | NM_007594:-202        | Calu          | PROMOTER               | 0.920                                                        | 0.629                          | 1414.62            | 889.23             | 0.578                          | 1340.39            | 774.96             |
| A_68_P30778319 | chr16:55905763-55905807                           | NM_028815:29177       | Cep97         | INSIDE                 | 0.920                                                        | 2.708                          | 864.84             | 2341.89            | 2.492                          | 772.19             | 1924.47            |
| A_68_P20148455 | chr1:36528583-36528627                            | NM_033570:163         | Cnmn4         | INSIDE                 | 0.920                                                        | 1.936                          | 859.43             | 1663.84            | 1.781                          | 774.69             | 1379.84            |
| A_68_P25005643 | chr7:25370538-25370582                            | NM_023154:-2001       | Ethe1         | PROMOTER               | 0.920                                                        | 2.028                          | 1563.68            | 3170.59            | 1.865                          | 1194.52            | 2227.83            |
| A_68_P23145550 | chr4:99323204-99323248                            | NM_010425:237         | Foxd3         | INSIDE                 | 0.920                                                        | 0.511                          | 1677.83            | 857.45             | 0.470                          | 1431.85            | 673.51             |
| A_68_P24133860 | chr5:139625951-139625996                          | NM_001081265:-203     | Heatr2        | PROMOTER               | 0.920                                                        | 3.659                          | 8339.11            | 30511.15           | 3.366                          | 4849.44            | 16322.30           |
| A_68_P26228653 | chr8:124277085-124277129                          | NM_020605:22648       | Jph3          | INSIDE                 | 0.920                                                        | 3.301                          | 272.80             | 900.46             | 3.037                          | 203.59             | 618.29             |
| A_68_P31113143 | chr17:27053838-27053882                           | NM_053173:-175        | Kifc5b        | PROMOTER               | 0.920                                                        | 0.578                          | 1304.57            | 753.65             | 0.531                          | 985.08             | 523.54             |
| A_68_P24324309 | chr6:29010153-29010197                            | NM_008493:-46         | Lep           | PROMOTER               | 0.920                                                        | 2.123                          | 2161.27            | 4589.25            | 1.954                          | 1707.95            | 3337.86            |
| A_68_P28565711 | chr12:79849726-79849770                           | NM_019579:-185        | Mpp5          | PROMOTER               | 0.920                                                        | 1.769                          | 700.74             | 1239.95            | 1.629                          | 663.69             | 1080.89            |
| A_68_P31256052 | chr17:56568252-56568296                           | NM_011218:47629       | Ptprs         | INSIDE                 | 0.920                                                        | 3.075                          | 561.43             | 1726.20            | 2.829                          | 522.54             | 1478.44            |
| A_68_P31947894 | chr19:10092837-10092881                           | NM_144538:141         | Rab3il1       | INSIDE                 | 0.920                                                        | 0.690                          | 3336.68            | 2303.44            | 0.635                          | 2711.30            | 1721.75            |
| A_68_P32070014 | chr19:32462198-32462242                           | NM_144792:724         | Sgms1         | INSIDE                 | 0.920                                                        | 0.712                          | 2112.33            | 1503.37            | 0.655                          | 1594.68            | 1044.16            |
| A_68_P24979911 | chr7:16730509-16730553                            | NM_148946:14882       | Stc8a2        | INSIDE                 | 0.920                                                        | 1.764                          | 1388.49            | 2449.16            | 1.623                          | 1108.67            | 1799.57            |
| A_68_P23650101 | chr5:44617682-44617726                            | NM_173764:141         | Tapt1         | INSIDE                 | 0.920                                                        | 1.921                          | 750.67             | 1442.21            | 1.767                          | 714.94             | 1263.53            |
| A_68_P26940975 | chr10:11211181-11211825                           |                       | Unknown       |                        | 0.920                                                        | 3.073                          | 1680.13            | 5162.79            | 2.828                          | 1400.89            | 3961.28            |
| A_68_P30671438 | A_68_P30671438                                    |                       | Unknown       |                        | 0.920                                                        | 1.812                          | 1071.22            | 1941.35            | 1.667                          | 961.31             | 1602.97            |
| A_68_P25730018 | chr8:27096782-27096826                            | NM_029037:7789        | 4930444A02Rik | INSIDE                 | 0.919                                                        | 2.917                          | 1340.66            | 3911.08            | 2.682                          | 1135.86            | 3046.79            |
| A_68_P20086661 | chr1:23108998-23109042                            | NM_025746:72          | 4933415F23Rik | INSIDE                 | 0.919                                                        | 2.250                          | 473.59             | 1065.65            | 2.068                          | 431.60             | 892.56             |
| A_68_P25677778 | chr8:14962588-14962634                            | NM_001037736:50894    | Arhgef10      | INSIDE                 | 0.919                                                        | 2.919                          | 990.48             | 2891.20            | 2.682                          | 718.70             | 1927.50            |

| ProbeName      | Target position of probe on CpG island microarray | TargetID                | GeneSymbol    | CpG island Description | Ratio of relative methylation (TiO <sub>2</sub> -NP/Vehicle) | Sham group                     |                    |                    | TiO <sub>2</sub> -H group      |                    |                    |
|----------------|---------------------------------------------------|-------------------------|---------------|------------------------|--------------------------------------------------------------|--------------------------------|--------------------|--------------------|--------------------------------|--------------------|--------------------|
|                |                                                   |                         |               |                        |                                                              | Relative methylation (Cy5/Cy3) | Cy3 signal (Input) | Cy5 signal (MeDIP) | Relative methylation (Cy5/Cy3) | Cy3 signal (Input) | Cy5 signal (MeDIP) |
| A_68_P25957004 | chr8:74000092-74000136                            | NM_025600:7022          | Dda1          | INSIDE                 | 0.919                                                        | 1.657                          | 3085.78            | 5112.48            | 1.523                          | 2569.43            | 3912.55            |
| A_68_P30361554 | chr15:78502409-78502453                           | NM_183141:46113         | Elfn2         | INSIDE                 | 0.919                                                        | 1.906                          | 780.06             | 1486.59            | 1.752                          | 708.23             | 1240.82            |
| A_68_P26885589 | chr9:121698137-121698187                          | NR_027967:2076          | Hhah1         | INSIDE                 | 0.919                                                        | 3.102                          | 802.68             | 2489.87            | 2.849                          | 625.77             | 1783.02            |
| A_68_P31828823 | chr18:74129671-74129715                           | NM_172632:94911         | Mapk4         | INSIDE                 | 0.919                                                        | 1.826                          | 692.70             | 1265.01            | 1.678                          | 590.55             | 990.84             |
| A_68_P28621837 | chr12:90498937-90498981                           | NM_172544:307125        | Nrxn3         | INSIDE                 | 0.919                                                        | 2.469                          | 1976.42            | 4878.99            | 2.269                          | 1430.31            | 3245.83            |
| A_68_P22309970 | chr3:87587747-87587797                            | NM_001033124:11312      | Ntrk1         | INSIDE                 | 0.919                                                        | 2.231                          | 527.81             | 1177.69            | 2.051                          | 428.47             | 878.99             |
| A_68_P22165658 | chr3:57651977-57652021                            | NM_019410:-319          | Pfn2          | PROMOTER               | 0.919                                                        | 0.648                          | 2123.25            | 1375.69            | 0.595                          | 1737.79            | 1034.59            |
| A_68_P23361257 | chr4:140517377-140517421                          | NM_023374:213           | Sdhh          | INSIDE                 | 0.919                                                        | 1.651                          | 757.26             | 1250.61            | 1.518                          | 665.89             | 1011.16            |
| A_68_P21054133 | chr2:21127231-21127275                            | NM_001001297:-98        | Thns1l        | DIVERGENT_PROMOTER     | 0.919                                                        | 0.730                          | 2338.84            | 1706.39            | 0.671                          | 1924.01            | 1290.21            |
| A_68_P32683274 | chrX:133462451-133462502                          | NM_027067:613           | 1700014N06Rik | INSIDE                 | 0.918                                                        | 2.891                          | 585.23             | 1692.17            | 2.655                          | 289.14             | 767.62             |
| A_68_P30484701 | chr15:100058334-100058378                         | NM_007497:67            | Atf1          | INSIDE                 | 0.918                                                        | 0.649                          | 794.37             | 515.70             | 0.596                          | 714.51             | 425.61             |
| A_68_P30337697 | chr15:74359726-74359770                           | NM_174991:13123         | Bai1          | INSIDE                 | 0.918                                                        | 2.542                          | 3558.01            | 9045.16            | 2.333                          | 2257.02            | 5265.51            |
| A_68_P27228309 | chr10:69651754-69651798                           | NM_00111121:91908       | Ccdc6         | INSIDE                 | 0.918                                                        | 1.657                          | 1587.61            | 2631.07            | 1.521                          | 1246.15            | 1895.54            |
| A_68_P24376401 | chr6:38203728-38203772                            | NM_194061:259           | D630045J12Rik | INSIDE                 | 0.918                                                        | 1.605                          | 3985.68            | 6398.21            | 1.473                          | 3028.58            | 4461.45            |
| A_68_P24046892 | chr5:122303021-122303065                          | NM_175474:4006          | Fam109a       | INSIDE                 | 0.918                                                        | 2.456                          | 1651.48            | 4056.63            | 2.255                          | 1259.89            | 2840.97            |
| A_68_P26065154 | chr8:94883835-94883879                            | NM_018826:2162          | Irx5          | INSIDE                 | 0.918                                                        | 0.643                          | 1283.13            | 824.75             | 0.590                          | 1241.43            | 732.50             |
| A_68_P21842274 | chr2:168396695-168396739                          | NM_001136073:18975      | Nfate2        | INSIDE                 | 0.918                                                        | 3.193                          | 485.87             | 1551.40            | 2.930                          | 526.18             | 1541.56            |
| A_68_P24643141 | chr6:92041701-92041746                            | NM_011630:312           | Nr2c2         | INSIDE                 | 0.918                                                        | 2.773                          | 368.84             | 1022.84            | 2.545                          | 354.06             | 901.20             |
| A_68_P28159702 | chr11:116360052-116360096                         | NM_026364:-8414         | Prpsap1       | PROMOTER               | 0.918                                                        | 1.562                          | 1892.27            | 2956.49            | 1.434                          | 1514.92            | 2172.83            |
| A_68_P21635428 | chr2:131346491-131346535                          | NM_001177833:28915      | Smox          | INSIDE                 | 0.918                                                        | 1.877                          | 1749.46            | 3284.60            | 1.723                          | 1417.18            | 2442.32            |
| A_68_P24912679 | chr6:143782088-143782132                          | NM_001113559:375968     | Sox5          | INSIDE                 | 0.918                                                        | 2.312                          | 1433.26            | 3314.02            | 2.122                          | 1134.07            | 2407.00            |
| A_68_P21431326 | chr2:92755177-92755221                            | NM_030725:-59           | Syt13         | PROMOTER               | 0.918                                                        | 0.484                          | 1817.99            | 880.42             | 0.445                          | 1664.21            | 739.91             |
| A_68_P32147506 | chr19:47149599-47149649                           | NM_177342:7387          | Taf5          | INSIDE                 | 0.918                                                        | 2.631                          | 599.92             | 1578.10            | 2.414                          | 528.51             | 1275.59            |
| A_68_P28524377 | chr12:72212495-72212539                           | NM_029227:102           | Tomm20l       | INSIDE                 | 0.918                                                        | 1.551                          | 1591.20            | 2468.23            | 1.424                          | 1402.54            | 1997.90            |
| A_68_P24951591 | chr7:4969560-4969604                              | NM_025324:2473          | Zfp524        | INSIDE                 | 0.918                                                        | 2.127                          | 1471.39            | 3129.84            | 1.953                          | 1061.33            | 2072.31            |
| A_68_P25027730 | chr7:30304085-30304129                            | ENSMUST00000141713:-117 |               | PROMOTER               | 0.918                                                        | 2.141                          | 593.13             | 1270.08            | 1.965                          | 539.71             | 1060.76            |
| A_68_P31632916 | chr18:38409853-38409897                           | NR_015475:-22           | 1700086O06Rik | DIVERGENT_PROMOTER     | 0.917                                                        | 0.416                          | 1355.48            | 563.97             | 0.381                          | 1069.20            | 407.73             |
| A_68_P21566910 | chr2:118741704-118741748                          | NM_00104523:14376       | Bahd1         | INSIDE                 | 0.917                                                        | 1.807                          | 970.43             | 1753.47            | 1.658                          | 736.05             | 1220.16            |
| A_68_P21821741 | chr2:164941626-164941673                          | NM_174988:118588        | Cdh22         | INSIDE                 | 0.917                                                        | 2.649                          | 398.23             | 1054.83            | 2.428                          | 331.88             | 805.89             |
| A_68_P21605248 | chr2:125684747-125684791                          | NM_009939:-14           | Cops2         | DIVERGENT_PROMOTER     | 0.917                                                        | 2.064                          | 4036.12            | 8328.99            | 1.892                          | 3090.50            | 5847.58            |
| A_68_P23284203 | chr4:126911090-126911134                          | NM_198618:64598         | Dlgap3        | INSIDE                 | 0.917                                                        | 3.055                          | 949.79             | 2902.01            | 2.802                          | 867.32             | 2429.83            |
| A_68_P30981935 | chr16:94748214-94748258                           | NM_007834:0             | Dscr3         | INSIDE                 | 0.917                                                        | 1.851                          | 1196.58            | 2215.01            | 1.698                          | 912.55             | 1549.24            |
| A_68_P26585941 | chr9:64971903-64971947                            | NM_020043:22623         | Igdec4        | INSIDE                 | 0.917                                                        | 1.778                          | 654.85             | 1164.43            | 1.631                          | 592.66             | 966.37             |
| A_68_P26546334 | chr9:58046265-58046309                            | NM_001161535:3236       | Islr2         | INSIDE                 | 0.917                                                        | 0.582                          | 2192.49            | 1276.24            | 0.534                          | 1704.50            | 909.84             |
| A_68_P23303541 | chr4:130506143-130506190                          | NM_010769:5867          | Matn1         | INSIDE                 | 0.917                                                        | 4.825                          | 771.32             | 3721.94            | 4.425                          | 633.88             | 2805.09            |
| A_68_P23088454 | chr4:87679337-87679381                            | NM_027326:-47           | Mllt3         | PROMOTER               | 0.917                                                        | 0.673                          | 1179.48            | 793.40             | 0.617                          | 1042.83            | 643.36             |
| A_68_P29619205 | chr14:56290728-56290772                           | NM_008683:-7            | Nedd8         | DIVERGENT_PROMOTER     | 0.917                                                        | 0.531                          | 1414.85            | 751.63             | 0.487                          | 1021.37            | 497.47             |
| A_68_P28514077 | chr12:70457809-70457853                           | NM_025441:323           | Nemf          | INSIDE                 | 0.917                                                        | 0.674                          | 1301.03            | 877.22             | 0.618                          | 1102.99            | 682.05             |
| A_68_P25090602 | chr7:52263044-52263088                            | NM_00100842:8553        | Scafl1        | INSIDE                 | 0.917                                                        | 2.656                          | 1165.01            | 3094.49            | 2.435                          | 904.05             | 2201.41            |
| A_68_P26540061 | chr9:56919951-56919995                            | NM_001110350:-4210      | Sin3a         | PROMOTER               | 0.917                                                        | 2.642                          | 936.69             | 2475.05            | 2.422                          | 713.46             | 1728.21            |
| A_68_P21986758 | chr3:21974743-21974787                            | NM_030732:-809          | Tb1xr1        | PROMOTER               | 0.917                                                        | 2.090                          | 871.44             | 1821.59            | 1.916                          | 889.85             | 1705.01            |
| A_68_P22168164 | chr3:58219493-58219537                            | NM_001081229:-96        | Tsc22d2       | PROMOTER               | 0.917                                                        | 0.522                          | 1104.35            | 576.37             | 0.479                          | 1013.28            | 484.90             |
| A_68_P32203591 | chr19:56949104-56949148                           | NM_172840:221           | Vwa2          | INSIDE                 | 0.917                                                        | 0.442                          | 1255.21            | 554.21             | 0.405                          | 1057.06            | 427.97             |
| A_68_P25021517 | chr7:29163975-29164019                            | NM_011756:251           | Zfp36         | INSIDE                 | 0.917                                                        | 0.578                          | 1544.11            | 893.06             | 0.530                          | 1323.56            | 701.65             |
| A_68_P27288262 | chr10:80702920-80702964                           | NM_001034895:7035       | Zfr2          | INSIDE                 | 0.917                                                        | 1.944                          | 698.85             | 1358.24            | 1.783                          | 681.95             | 1215.59            |
| A_68_P24631966 | chr6:90319994-90320038                            | NM_030260:529           | Zxdc          | INSIDE                 | 0.917                                                        | 0.578                          | 1009.86            | 583.85             | 0.530                          | 867.87             | 459.88             |
| A_68_P22185882 | chr3:61963377-61963421                            |                         |               | Unknown                | 0.917                                                        | 3.084                          | 657.13             | 2026.33            | 2.829                          | 540.90             | 1530.11            |
| A_68_P25190566 | chr7:73985093-73985137                            | NM_001033877:494        | Adams17       | INSIDE                 | 0.916                                                        | 2.066                          | 1073.93            | 2218.32            | 1.892                          | 931.62             | 1762.53            |
| A_68_P28741429 | chr12:112216865-112216909                         | NM_175207:345           | Ankrd9        | INSIDE                 | 0.916                                                        | 1.627                          | 678.59             | 1104.03            | 1.491                          | 698.10             | 1040.77            |
| A_68_P29484378 | chr14:27783198-27783242                           | NM_145221:517           | Appl1         | INSIDE                 | 0.916                                                        | 0.628                          | 3298.86            | 2071.03            | 0.575                          | 2583.83            | 1485.80            |
| A_68_P27100734 | chr10:43231084-43231128                           | NM_199028:32161         | Bend3         | INSIDE                 | 0.916                                                        | 1.797                          | 615.40             | 1106.09            | 1.646                          | 512.34             | 843.26             |

| ProbeName      | Target position of probe on CpG island microarray | TargetID            | GeneSymbol    | CpG island Description | Ratio of relative methylation (TiO <sub>2</sub> -NP/Vehicle) | Sham group                     |                    |                    | TiO <sub>2</sub> -H group      |                    |                    |
|----------------|---------------------------------------------------|---------------------|---------------|------------------------|--------------------------------------------------------------|--------------------------------|--------------------|--------------------|--------------------------------|--------------------|--------------------|
|                |                                                   |                     |               |                        |                                                              | Relative methylation (Cy5/Cy3) | Cy3 signal (Input) | Cy5 signal (MeDIP) | Relative methylation (Cy5/Cy3) | Cy3 signal (Input) | Cy5 signal (MeDIP) |
| A_68_P25430225 | chr7:120512643-120512687                          | NM_133700:189       | Btbd10        | INSIDE                 | 0.916                                                        | 0.561                          | 1769.13            | 992.57             | 0.514                          | 1503.52            | 772.39             |
| A_68_P28171198 | chr11:118280168-118280212                         | NM_001025617:176    | Cant1         | INSIDE                 | 0.916                                                        | 0.647                          | 2755.70            | 1783.83            | 0.593                          | 2199.21            | 1304.61            |
| A_68_P24820867 | chr6:125444742-125444786                          | NM_007657:9         | Cd9           | INSIDE                 | 0.916                                                        | 2.147                          | 2772.20            | 5951.48            | 1.967                          | 2263.15            | 4451.33            |
| A_68_P27266462 | chr10:76628409-76628453                           | NM_009929:845       | Col18a1       | INSIDE                 | 0.916                                                        | 0.616                          | 1428.79            | 880.26             | 0.565                          | 1250.35            | 705.97             |
| A_68_P29698998 | chr14:70474791-70474835                           | NM_018781:-2439     | Egr3          | PROMOTER               | 0.916                                                        | 0.521                          | 1351.15            | 703.35             | 0.477                          | 1329.65            | 634.18             |
| A_68_P20442328 | chr1:93309360-93309404                            | NM_019479:417       | Hes6          | INSIDE                 | 0.916                                                        | 0.688                          | 1596.55            | 1098.15            | 0.630                          | 1328.47            | 836.90             |
| A_68_P28293526 | chr12:25783349-25783393                           | NM_010496:-2413     | Id2           | PROMOTER               | 0.916                                                        | 1.739                          | 3890.73            | 6767.63            | 1.593                          | 3011.29            | 4796.95            |
| A_68_P20556966 | chr1:121317400-121317444                          | NM_008381:1403      | Inhbb         | INSIDE                 | 0.916                                                        | 0.693                          | 1725.04            | 1195.27            | 0.634                          | 1378.94            | 874.78             |
| A_68_P21812069 | chr2:163201531-163201575                          | NM_021566:22157     | Jph2          | INSIDE                 | 0.916                                                        | 2.714                          | 715.06             | 1940.86            | 2.485                          | 678.76             | 1687.06            |
| A_68_P25960691 | chr8:74843873-74843917                            | NM_008452:934       | Klf2          | INSIDE                 | 0.916                                                        | 1.986                          | 675.18             | 1340.86            | 1.819                          | 596.70             | 1085.18            |
| A_68_P27880946 | chr11:66908183-66908227                           | NM_001099635:16403  | Myh3          | INSIDE                 | 0.916                                                        | 2.908                          | 275.28             | 800.52             | 2.665                          | 275.51             | 734.13             |
| A_68_P32552416 | chrX:96086453-96086497                            | NM_052976:-150      | Ophn1         | PROMOTER               | 0.916                                                        | 2.159                          | 790.82             | 1707.24            | 1.978                          | 565.28             | 1118.07            |
| A_68_P27553983 | chr11:3674675-3674719                             | NM_152818:89210     | Osbp2         | INSIDE                 | 0.916                                                        | 2.192                          | 1166.26            | 2556.72            | 2.008                          | 993.25             | 1994.00            |
| A_68_P23234765 | chr4:117168524-117168568                          | NM_025739:974       | Rnf220        | INSIDE                 | 0.916                                                        | 0.675                          | 1152.63            | 778.22             | 0.618                          | 969.97             | 599.77             |
| A_68_P25016961 | chr7:28152919-28152968                            | NM_001199235:26582  | Spnb4         | INSIDE                 | 0.916                                                        | 4.566                          | 1382.05            | 6310.84            | 4.181                          | 998.02             | 4172.60            |
| A_68_P20191095 | chr1:43884838-43884882                            | NM_026430:-307      | Uxs1          | PROMOTER               | 0.916                                                        | 0.521                          | 1162.04            | 605.62             | 0.477                          | 941.87             | 449.59             |
| A_68_P25805594 | chr8:41509577-41509621                            | NM_178395:430       | Zdhhc2        | INSIDE                 | 0.916                                                        | 0.473                          | 1937.26            | 915.80             | 0.433                          | 1596.11            | 690.88             |
| A_68_P25004348 | chr7:25118652-25118696                            | NM_001163810:310    | 1700008P20Rik | INSIDE                 | 0.915                                                        | 1.962                          | 772.49             | 1515.53            | 1.794                          | 615.01             | 1103.54            |
| A_68_P25260060 | chr7:86418215-86418259                            | NM_018811:85        | Abhd2         | INSIDE                 | 0.915                                                        | 0.580                          | 878.58             | 509.34             | 0.530                          | 794.98             | 421.51             |
| A_68_P32233080 | chrX:5659260-5659304                              | NM_00103321:1256    | AU022751      | INSIDE                 | 0.915                                                        | 2.228                          | 799.75             | 1782.09            | 2.038                          | 347.59             | 708.37             |
| A_68_P27183499 | chr10:61440751-61440795                           | NM_007731:1084      | Col13a1       | INSIDE                 | 0.915                                                        | 0.683                          | 5777.62            | 3943.80            | 0.625                          | 4263.72            | 2663.04            |
| A_68_P25755967 | chr8:32200134-32200178                            | NM_025869:23        | Dusp26        | INSIDE                 | 0.915                                                        | 3.055                          | 317.69             | 970.63             | 2.797                          | 319.89             | 894.73             |
| A_68_P27640628 | chr11:22186580-22186624                           | NM_153078:-761      | Ehbp1         | PROMOTER               | 0.915                                                        | 0.588                          | 1787.92            | 1051.22            | 0.538                          | 1426.37            | 767.05             |
| A_68_P29702035 | chr14:70954292-70954336                           | NM_021877:452       | Hr            | INSIDE                 | 0.915                                                        | 0.592                          | 1273.02            | 753.64             | 0.542                          | 941.22             | 510.03             |
| A_68_P28149754 | chr11:114647920-114647964                         | NM_001102615:21240  | Kif19a        | INSIDE                 | 0.915                                                        | 2.153                          | 384.92             | 828.78             | 1.970                          | 379.74             | 748.13             |
| A_68_P26919699 | chr10:7309827-7309871                             | NM_172784:251       | Lrp11         | INSIDE                 | 0.915                                                        | 2.778                          | 188.46             | 523.47             | 2.541                          | 237.78             | 604.10             |
| A_68_P27356288 | chr10:93352563-93352607                           | NM_019648:1363      | Metap2        | INSIDE                 | 0.915                                                        | 0.516                          | 1843.03            | 951.06             | 0.472                          | 1732.10            | 818.08             |
| A_68_P27857774 | chr11:62945885-62945929                           | NM_008885:895       | Pmp22         | INSIDE                 | 0.915                                                        | 0.587                          | 1384.16            | 811.85             | 0.537                          | 1023.54            | 549.40             |
| A_68_P25025139 | chr7:29849652-29849696                            | NM_009109:60496     | Ryr1          | INSIDE                 | 0.915                                                        | 2.309                          | 420.88             | 971.83             | 2.112                          | 385.55             | 814.32             |
| A_68_P26872706 | chr9:119395898-119395942                          | NM_021544:92214     | Scn5a         | INSIDE                 | 0.915                                                        | 2.434                          | 538.01             | 1309.61            | 2.227                          | 409.24             | 911.22             |
| A_68_P25588801 | chr7:148623566-148623613                          | NM_001177576:-3096  | Slc25a22      | PROMOTER               | 0.915                                                        | 2.258                          | 927.83             | 2094.59            | 2.065                          | 791.15             | 1633.90            |
| A_68_P24593031 | chr6:83318401-83318445                            | NM_183138:73250     | Tet3          | INSIDE                 | 0.915                                                        | 2.163                          | 2635.46            | 5701.62            | 1.979                          | 1852.19            | 3666.35            |
| A_68_P27537442 | chr10:127114141-127114185                         | NM_173732:42        | Tmem194       | INSIDE                 | 0.915                                                        | 0.405                          | 5104.16            | 2065.48            | 0.370                          | 3901.48            | 1445.03            |
| A_68_P20354370 | chr1:75479524-75479568                            | NM_177056:3440      | Tmem198       | INSIDE                 | 0.915                                                        | 2.226                          | 1183.36            | 2633.61            | 2.036                          | 891.58             | 1815.56            |
| A_68_P26743635 | chr9:95650332-95650376                            | NM_011643:423       | Trpc1         | INSIDE                 | 0.915                                                        | 0.635                          | 1640.21            | 1041.39            | 0.581                          | 1449.49            | 842.05             |
| A_68_P22038455 | chr3:32409802-32409846                            | NM_144519:311       | Zfp639        | INSIDE                 | 0.915                                                        | 2.020                          | 348.30             | 703.67             | 1.848                          | 356.15             | 658.24             |
| A_68_P33007654 | A_68_P33007654                                    |                     | Unknown       |                        | 0.915                                                        | 2.377                          | 1514.86            | 3600.31            | 2.175                          | 1622.01            | 3527.90            |
| A_68_P28194146 | chr12:3235815-3235859                             | NR_015551:46        | 1700012B15Rik | INSIDE                 | 0.914                                                        | 0.691                          | 1237.93            | 855.77             | 0.632                          | 1004.35            | 634.45             |
| A_68_P22376196 | chr3:101408366-101408410                          | NM_144900:192       | Atp1a1        | INSIDE                 | 0.914                                                        | 2.095                          | 624.80             | 1308.72            | 1.915                          | 553.33             | 1059.59            |
| A_68_P28731503 | chr12:110272067-110272111                         | NM_001163175:34339  | Begain        | INSIDE                 | 0.914                                                        | 3.240                          | 566.15             | 1834.45            | 2.963                          | 529.39             | 1568.50            |
| A_68_P25585266 | chr7:148042623-148042667                          | NM_018742:-362      | Bet11         | DIVERGENT_PROMOTER     | 0.914                                                        | 0.608                          | 3728.44            | 2266.10            | 0.556                          | 2848.61            | 1582.93            |
| A_68_P26475229 | chr9:45480644-45480688                            | NM_001081270:242291 | Dscam1        | INSIDE                 | 0.914                                                        | 1.947                          | 485.53             | 945.16             | 1.778                          | 388.13             | 690.22             |
| A_68_P31961135 | chr19:12575854-12575898                           | NM_172442:610       | Dtx4          | INSIDE                 | 0.914                                                        | 2.018                          | 1040.25            | 2099.57            | 1.844                          | 920.23             | 1697.29            |
| A_68_P29625742 | chr14:57655527-57655571                           | NM_016975:21234     | Gja3          | INSIDE                 | 0.914                                                        | 3.116                          | 2408.74            | 7505.58            | 2.847                          | 1902.11            | 5415.66            |
| A_68_P27594323 | chr11:11936669-11936713                           | NM_001177629:-8716  | Grb10         | PROMOTER               | 0.914                                                        | 1.988                          | 1197.26            | 2379.78            | 1.817                          | 1118.25            | 2031.78            |
| A_68_P23080768 | chr4:86257578-86257622                            | NM_173400:326       | Haus6         | INSIDE                 | 0.914                                                        | 0.692                          | 1172.91            | 812.12             | 0.633                          | 1036.91            | 656.16             |
| A_68_P27828619 | chr11:57823508-57823552                           | NM_028451:965       | Larp1         | INSIDE                 | 0.914                                                        | 2.673                          | 2151.18            | 5750.12            | 2.443                          | 1850.51            | 4520.88            |
| A_68_P23229425 | chr4:116136181-116136225                          | NM_001042743:586    | Mast2         | INSIDE                 | 0.914                                                        | 3.392                          | 19747.02           | 66976.33           | 3.100                          | 12848.53           | 39828.77           |
| A_68_P27995000 | chr11:87409082-87409126                           | NM_133215:3386      | Mtmr4         | INSIDE                 | 0.914                                                        | 1.967                          | 515.81             | 1014.43            | 1.798                          | 453.49             | 815.55             |
| A_68_P21909034 | chr2:180922268-180922312                          | NM_025598:243       | Pdpdf         | INSIDE                 | 0.914                                                        | 0.597                          | 1292.55            | 771.74             | 0.546                          | 1078.22            | 588.64             |
| A_68_P27841039 | chr11:59953284-59953328                           | NM_001037764:-277   | Rai1          | PROMOTER               | 0.914                                                        | 0.413                          | 1677.63            | 693.21             | 0.378                          | 1332.67            | 503.35             |

| ProbeName      | Target position of probe on CpG island microarray | TargetID                 | GeneSymbol    | CpG island Description | Ratio of relative methylation (TiO <sub>2</sub> -NP/Vehicle) | Sham group                     |                    |                    | TiO <sub>2</sub> -H group      |                    |                    |
|----------------|---------------------------------------------------|--------------------------|---------------|------------------------|--------------------------------------------------------------|--------------------------------|--------------------|--------------------|--------------------------------|--------------------|--------------------|
|                |                                                   |                          |               |                        |                                                              | Relative methylation (Cy5/Cy3) | Cy3 signal (Input) | Cy5 signal (MeDIP) | Relative methylation (Cy5/Cy3) | Cy3 signal (Input) | Cy5 signal (MeDIP) |
| A_68_P27943625 | chr11:78301348-78301392                           | NM_001168521-9886        | Sarm1         | INSIDE                 | 0.914                                                        | 2.161                          | 684.88             | 1480.18            | 1.975                          | 660.90             | 1305.19            |
| A_68_P32116949 | chr19:41817858-41817902                           | NM_015748:466            | Slit1         | INSIDE                 | 0.914                                                        | 0.633                          | 1233.86            | 781.56             | 0.579                          | 1014.56            | 587.63             |
| A_68_P21635427 | chr2:131346365-131346409                          | NM_001177833:28789       | Smox          | INSIDE                 | 0.914                                                        | 1.979                          | 427.09             | 845.07             | 1.809                          | 401.49             | 726.30             |
| A_68_P22829978 | chr4:34137124-34137168                            | NM_026293:-104           | Spaca1        | PROMOTER               | 0.914                                                        | 2.080                          | 1572.08            | 3270.31            | 1.902                          | 1197.05            | 2276.96            |
| A_68_P21370051 | chr2:79475802-79475846                            | NM_080558:243            | Ssfa2         | INSIDE                 | 0.914                                                        | 0.666                          | 924.67             | 615.91             | 0.609                          | 797.06             | 485.14             |
| A_68_P26948442 | chr10:12684445-12684489                           | NM_001163590:-401        | Stx11         | PROMOTER               | 0.914                                                        | 0.344                          | 1753.27            | 602.35             | 0.314                          | 1441.73            | 452.60             |
| A_68_P23240955 | chr4:118214466-118214510                          | NM_172383:1843           | Tmem125       | INSIDE                 | 0.914                                                        | 2.009                          | 918.78             | 1845.82            | 1.835                          | 837.11             | 1536.48            |
| A_68_P24092032 | chr5:130555232-130555276                          | NM_001130476:-101        | Tpst1         | PROMOTER               | 0.914                                                        | 1.707                          | 2098.62            | 3581.88            | 1.560                          | 1867.56            | 2912.99            |
| A_68_P31862936 | chr18:80403608-80403652                           | NM_001042408:25          | Txn14a        | INSIDE                 | 0.914                                                        | 0.452                          | 1296.66            | 586.40             | 0.414                          | 1071.83            | 443.25             |
| A_68_P26217006 | chr8:122480748-122480792                          | NM_009462:46019          | Usp10         | INSIDE                 | 0.914                                                        | 4.372                          | 543.87             | 2377.79            | 3.997                          | 496.70             | 1985.08            |
| A_68_P24425593 | chr6:48014031-48014075                            | NM_001163475:22540       | Zfp746        | INSIDE                 | 0.914                                                        | 1.687                          | 1279.20            | 2157.94            | 1.542                          | 867.90             | 1338.47            |
| A_68_P25992688 | chr8:81636396-81636453                            | NM_178267:84089          | Zfp827        | INSIDE                 | 0.914                                                        | 2.145                          | 621.65             | 1333.70            | 1.960                          | 565.72             | 1108.89            |
| A_68_P23971471 | chr5:108796094-108796138                          | ENSMUST00000100944:-2760 |               | PROMOTER               | 0.914                                                        | 0.503                          | 1333.30            | 670.04             | 0.460                          | 1135.89            | 521.95             |
| A_68_P27670840 | chr11:28483846-28483890                           | NM_001166661:428         | Ccdc85a       | INSIDE                 | 0.913                                                        | 1.875                          | 1347.24            | 2526.48            | 1.711                          | 1118.10            | 1913.35            |
| A_68_P23936790 | chr5:102193955-102193999                          | NM_173370:-172           | Cds1          | PROMOTER               | 0.913                                                        | 2.051                          | 460.31             | 943.91             | 1.873                          | 389.65             | 729.83             |
| A_68_P20938884 | chr1:193399786-193399830                          | NM_178632:196            | Ints7         | INSIDE                 | 0.913                                                        | 0.605                          | 905.88             | 548.13             | 0.552                          | 698.91             | 386.01             |
| A_68_P24517582 | chr6:66485182-66485226                            | NM_019499:-257           | Mad2l1        | PROMOTER               | 0.913                                                        | 1.605                          | 1635.32            | 2625.02            | 1.465                          | 1352.44            | 1981.72            |
| A_68_P29618280 | chr14:56139420-56139464                           | NM_008736:3586           | Nrl           | INSIDE                 | 0.913                                                        | 2.239                          | 658.22             | 1473.69            | 2.044                          | 644.40             | 1317.06            |
| A_68_P31632605 | chr18:38358832-38358876                           | NM_029357:10562          | Pcdh1         | INSIDE                 | 0.913                                                        | 2.962                          | 3588.90            | 10630.72           | 2.704                          | 2750.09            | 7435.50            |
| A_68_P31924876 | chr19:4756468-4756512                             | NM_025717:-34            | Rbm4b         | PROMOTER               | 0.913                                                        | 3.544                          | 477.60             | 1692.55            | 3.235                          | 498.05             | 1610.97            |
| A_68_P23523568 | chr5:20457296-20457340                            | NM_001080977:322         | Rsb1l1        | INSIDE                 | 0.913                                                        | 0.553                          | 1654.69            | 915.68             | 0.505                          | 1401.61            | 708.14             |
| A_68_P27804720 | chr11:53244141-53244185                           | NM_025352:171            | Uqcrq         | INSIDE                 | 0.913                                                        | 0.554                          | 1948.20            | 1078.99            | 0.506                          | 1537.84            | 777.74             |
| A_68_P23244789 | chr4:118966777-118966821                          | NM_011732:320            | Ybx1          | INSIDE                 | 0.913                                                        | 5.471                          | 1792.55            | 9806.91            | 4.995                          | 1327.80            | 6632.44            |
| A_68_P26154271 | chr8:111471277-111471321                          | NM_007496:232755         | Zfx3          | INSIDE                 | 0.913                                                        | 2.178                          | 895.93             | 1951.03            | 1.989                          | 812.63             | 1616.01            |
| A_68_P25009109 | chr7:26011119-26011163                            | NM_175436:4671           | Zfp526        | INSIDE                 | 0.913                                                        | 4.032                          | 1513.46            | 6101.83            | 3.683                          | 1116.70            | 4112.43            |
| A_68_P25992137 | chr8:81554288-81554333                            | NM_178267:1975           | Zfp827        | INSIDE                 | 0.913                                                        | 0.533                          | 1115.14            | 593.96             | 0.486                          | 976.80             | 475.19             |
| A_68_P26345262 | chr9:20871580-20871624                            | NM_001103168:-65         | Zgfp1         | PROMOTER               | 0.913                                                        | 2.273                          | 1245.74            | 2831.65            | 2.075                          | 1027.99            | 2133.35            |
| A_68_P25022915 | chr7:29415604-29415648                            | NM_175319:408            | C330005M16Rik | INSIDE                 | 0.912                                                        | 0.651                          | 1298.54            | 845.58             | 0.594                          | 1163.18            | 690.56             |
| A_68_P26699343 | chr9:86361138-86361182                            | NM_177208:400            | Dopey1        | INSIDE                 | 0.912                                                        | 2.230                          | 398.53             | 888.65             | 2.033                          | 465.42             | 946.08             |
| A_68_P29142607 | chr13:73984759-73984803                           | NM_028186:299            | Nkd2          | INSIDE                 | 0.912                                                        | 0.701                          | 2323.13            | 1627.44            | 0.639                          | 1701.10            | 1087.35            |
| A_68_P20088278 | chr1:23389719-23389763                            | NM_001081079:274         | Ogfr1l        | INSIDE                 | 0.912                                                        | 2.155                          | 479.67             | 1033.64            | 1.965                          | 435.94             | 856.55             |
| A_68_P23415894 | chr4:151370837-151370881                          | NM_172705:-570           | Phf13         | PROMOTER               | 0.912                                                        | 0.577                          | 1258.98            | 726.71             | 0.527                          | 968.80             | 510.13             |
| A_68_P24428217 | chr6:48546955-48546999                            | NM_001079901:3095        | Repin1        | INSIDE                 | 0.912                                                        | 2.121                          | 1402.80            | 2975.10            | 1.934                          | 1375.97            | 2660.65            |
| A_68_P28530875 | chr12:73337837-73337881                           | NM_001007596:-147        | Rtn1          | PROMOTER               | 0.912                                                        | 0.539                          | 1114.54            | 601.20             | 0.492                          | 836.05             | 411.21             |
| A_68_P32182248 | chr19:53464624-53464668                           | NM_172429:417            | Smdc1         | INSIDE                 | 0.912                                                        | 0.613                          | 1466.11            | 899.21             | 0.560                          | 1378.24            | 771.32             |
| A_68_P31834367 | chr18:75160274-75160318                           | NR_028552:-425           | Snord58b      | PROMOTER               | 0.912                                                        | 0.653                          | 1017.14            | 664.69             | 0.596                          | 894.02             | 532.84             |
| A_68_P26398840 | chr9:30939131-30939175                            | NM_011176:232            | St14          | INSIDE                 | 0.912                                                        | 0.608                          | 1464.50            | 889.92             | 0.554                          | 1174.70            | 651.04             |
| A_68_P21266476 | chr2:61654143-61654187                            | NM_009322:11655          | Tbr1          | DOWNSTREAM             | 0.912                                                        | 2.241                          | 595.49             | 1334.19            | 2.044                          | 707.44             | 1445.73            |
| A_68_P32393596 | chrX:52896212-52896256                            | ENSMUST00000163353:91502 |               | INSIDE                 | 0.912                                                        | 2.117                          | 2437.75            | 5160.65            | 1.931                          | 881.98             | 1703.23            |
| A_68_P22510980 | chr3:127540779-127540823                          | NM_145964:-390           | Ap1ar         | PROMOTER               | 0.911                                                        | 3.221                          | 314.24             | 1012.20            | 2.933                          | 333.22             | 977.43             |
| A_68_P26781225 | chr9:102528131-102528175                          | NM_001081122:302         | Cep63         | INSIDE                 | 0.911                                                        | 3.181                          | 2230.97            | 7096.27            | 2.897                          | 1829.44            | 5299.82            |
| A_68_P27261496 | chr10:75807584-75807628                           | NM_001081419:401         | Dip2a         | INSIDE                 | 0.911                                                        | 1.795                          | 1383.18            | 2482.49            | 1.636                          | 1131.51            | 1850.90            |
| A_68_P28054686 | chr11:98010707-98010751                           | NM_028149:202            | Fbxl20        | INSIDE                 | 0.911                                                        | 1.890                          | 2035.27            | 3846.59            | 1.723                          | 1624.25            | 2797.78            |
| A_68_P25004863 | chr7:25217918-25217962                            | NM_199013:12761          | Irgc1         | INSIDE                 | 0.911                                                        | 2.087                          | 327.08             | 682.46             | 1.901                          | 307.40             | 584.23             |
| A_68_P29863084 | chr14:103380991-103381035                         | NM_177715:842            | Ketd12        | INSIDE                 | 0.911                                                        | 1.894                          | 528.55             | 1001.18            | 1.725                          | 511.94             | 883.02             |
| A_68_P31827982 | chr18:73974763-73974807                           | NM_145494:262            | Me2           | INSIDE                 | 0.911                                                        | 0.498                          | 1563.41            | 777.81             | 0.453                          | 1366.81            | 619.14             |
| A_68_P21840223 | chr2:168056306-168056350                          | NM_001160330:207         | Mocs3         | INSIDE                 | 0.911                                                        | 2.755                          | 525.13             | 1446.59            | 2.509                          | 439.79             | 1103.43            |
| A_68_P26821058 | chr9:109833931-109833975                          | NM_001205331:-325        | Mtap4         | PROMOTER               | 0.911                                                        | 2.030                          | 1203.28            | 2442.62            | 1.849                          | 1202.70            | 2224.21            |
| A_68_P22741777 | chr4:13670508-13670552                            | NM_001111027:-7913       | Runx1t1       | PROMOTER               | 0.911                                                        | 2.605                          | 1098.61            | 2861.99            | 2.373                          | 870.09             | 2064.83            |
| A_68_P24215193 | chr6:6166905-6166949                              | NM_00117752:247          | Sle25a13      | INSIDE                 | 0.911                                                        | 0.546                          | 1122.71            | 613.06             | 0.498                          | 919.27             | 457.45             |
| A_68_P26978752 | chr10:18735310-18735354                           | NM_009397:-116           | Tnfrap3       | PROMOTER               | 0.911                                                        | 1.689                          | 879.64             | 1485.94            | 1.539                          | 860.43             | 1323.78            |

| ProbeName      | Target position of probe on CpG island microarray | TargetID           | GeneSymbol    | CpG island Description | Ratio of relative methylation (TiO <sub>2</sub> -NP/Vehicle) | Sham group                     |                    |                    | TiO <sub>2</sub> -H group      |                    |                    |
|----------------|---------------------------------------------------|--------------------|---------------|------------------------|--------------------------------------------------------------|--------------------------------|--------------------|--------------------|--------------------------------|--------------------|--------------------|
|                |                                                   |                    |               |                        |                                                              | Relative methylation (Cy5/Cy3) | Cy3 signal (Input) | Cy5 signal (MeDIP) | Relative methylation (Cy5/Cy3) | Cy3 signal (Input) | Cy5 signal (MeDIP) |
| A_68_P31156690 | chr17:35089452-35089496                           | NR_015536:-58      | 1110038B12Rik | PROMOTER               | 0.910                                                        | 0.466                          | 1142.58            | 532.88             | 0.425                          | 1012.88            | 430.05             |
| A_68_P21537142 | chr2:113688722-113688766                          | NM_181416:74       | Arhgap11a     | INSIDE                 | 0.910                                                        | 0.679                          | 2069.45            | 1405.16            | 0.618                          | 1635.40            | 1010.55            |
| A_68_P22338537 | chr3:94167894-94167938                            | NM_001136117:1551  | C2cd4d        | INSIDE                 | 0.910                                                        | 1.686                          | 821.80             | 1385.84            | 1.534                          | 695.46             | 1067.17            |
| A_68_P27275480 | chr10:78215153-78215197                           | NM_027630:638      | Ccdc105       | INSIDE                 | 0.910                                                        | 0.525                          | 1019.24            | 534.96             | 0.478                          | 818.26             | 390.88             |
| A_68_P30331033 | chr15:73377952-73378002                           | NM_001081066:34987 | Dennd3        | INSIDE                 | 0.910                                                        | 1.866                          | 798.39             | 1490.00            | 1.698                          | 668.94             | 1135.73            |
| A_68_P25507079 | chr7:134895761-134895805                          | NM_172748:5494     | Fbx119        | INSIDE                 | 0.910                                                        | 1.923                          | 1984.65            | 3817.08            | 1.751                          | 1680.12            | 2941.83            |
| A_68_P28080761 | chr11:102527193-102527237                         | NM_001127576:313   | Gm1564        | INSIDE                 | 0.910                                                        | 2.213                          | 643.54             | 1424.34            | 2.013                          | 620.00             | 1248.19            |
| A_68_P23321826 | chr4:133808110-133808154                          | NM_001099296:1889  | Grp1          | INSIDE                 | 0.910                                                        | 0.591                          | 929.60             | 549.80             | 0.538                          | 732.35             | 394.12             |
| A_68_P28748276 | chr12:113400089-113400133                         | NM_001097621:15692 | Kif26a        | INSIDE                 | 0.910                                                        | 3.526                          | 3820.00            | 13468.84           | 3.207                          | 2800.83            | 8981.82            |
| A_68_P24563506 | chr6:77193106-77193150                            | NM_028880:418      | Lrrtm1        | INSIDE                 | 0.910                                                        | 0.392                          | 1593.82            | 624.59             | 0.357                          | 1187.55            | 423.71             |
| A_68_P27279614 | chr10:79365826-79365870                           | NM_001163276:5835  | Med16         | INSIDE                 | 0.910                                                        | 2.087                          | 2603.62            | 5433.87            | 1.900                          | 1788.88            | 3399.11            |
| A_68_P22785945 | chr4:24423615-24423659                            | NM_199467:28       | Mms221        | INSIDE                 | 0.910                                                        | 1.637                          | 981.98             | 1607.63            | 1.489                          | 825.95             | 1230.23            |
| A_68_P28189462 | chr11:121098436-121098480                         | NM_026272:-91      | Narf          | DIVERGENT_PROMOTER     | 0.910                                                        | 1.511                          | 2766.99            | 4180.81            | 1.376                          | 2032.38            | 2795.90            |
| A_68_P27262051 | chr10:75905675-75905719                           | NM_008787:-39      | Pent          | DIVERGENT_PROMOTER     | 0.910                                                        | 0.519                          | 1174.90            | 609.59             | 0.472                          | 841.86             | 397.48             |
| A_68_P21630861 | chr2:130460763-130460807                          | NM_197945:7755     | Prosapip1     | INSIDE                 | 0.910                                                        | 1.758                          | 3024.45            | 5317.67            | 1.599                          | 2429.11            | 3885.29            |
| A_68_P26585375 | chr9:64868889-64868933                            | NM_021345:614      | Tplad1        | INSIDE                 | 0.910                                                        | 0.530                          | 1701.69            | 902.59             | 0.482                          | 1509.48            | 728.27             |
| A_68_P32050980 | chr19:29175604-29175648                           | NM_021525:-238     | Rel1          | PROMOTER               | 0.910                                                        | 0.603                          | 1026.50            | 619.10             | 0.549                          | 902.23             | 495.32             |
| A_68_P24979891 | chr7:16726357-16726401                            | NM_148946:10730    | Sle8a2        | INSIDE                 | 0.910                                                        | 1.947                          | 710.34             | 1383.30            | 1.772                          | 565.83             | 1002.69            |
| A_68_P27673285 | chr11:29073225-29073269                           | NM_134034:340      | Smek2         | INSIDE                 | 0.910                                                        | 0.600                          | 940.64             | 564.26             | 0.546                          | 688.87             | 376.24             |
| A_68_P23814579 | chr5:76612836-76612880                            | NM_011626:-46      | Tmem165       | PROMOTER               | 0.910                                                        | 1.780                          | 983.59             | 1750.47            | 1.620                          | 848.78             | 1374.83            |
| A_68_P31161191 | chr17:35974038-35974082                           | NM_011655:1186     | Tubb5         | INSIDE                 | 0.910                                                        | 2.097                          | 798.25             | 1673.90            | 1.909                          | 767.73             | 1465.82            |
| A_68_P20827835 | chr1:173341606-173341650                          | NM_009480:-183     | Usf1          | PROMOTER               | 0.910                                                        | 2.674                          | 926.55             | 2477.22            | 2.434                          | 905.46             | 2204.16            |
| A_68_P24992397 | chr7:19857058-19857102                            | NM_009499:123      | Vasp          | INSIDE                 | 0.910                                                        | 0.442                          | 1371.75            | 606.21             | 0.402                          | 1152.11            | 463.28             |
| A_68_P24864287 | chr6:134876970-134877014                          | NR_037955:-2117    | 1190002F15Rik | PROMOTER               | 0.909                                                        | 0.666                          | 2170.95            | 1445.29            | 0.605                          | 1924.43            | 1164.33            |
| A_68_P30927369 | chr16:85080522-85080569                           | NM_001198823:93407 | App           | INSIDE                 | 0.909                                                        | 6.198                          | 8581.05            | 53183.60           | 5.631                          | 5463.68            | 30767.67           |
| A_68_P21843263 | chr2:168567207-168567251                          | NM_015731:72       | Atp9a         | INSIDE                 | 0.909                                                        | 2.755                          | 438.76             | 1208.83            | 2.505                          | 434.09             | 1087.42            |
| A_68_P28752187 | chr12:113977286-113977330                         | NM_001024602:16924 | AW555464      | INSIDE                 | 0.909                                                        | 2.120                          | 2107.47            | 4467.78            | 1.928                          | 1826.84            | 3521.44            |
| A_68_P22775355 | chr4:21807011-21807055                            | NM_172687:211      | Coq3          | INSIDE                 | 0.909                                                        | 1.753                          | 1012.28            | 1774.71            | 1.594                          | 884.00             | 1409.17            |
| A_68_P25542608 | chr7:140968333-140968377                          | NM_133941:132      | Dhx32         | INSIDE                 | 0.909                                                        | 1.950                          | 556.22             | 1084.43            | 1.773                          | 565.66             | 1002.75            |
| A_68_P25020568 | chr7:28964442-28964486                            | NM_001037957:-37   | Dyrk1b        | PROMOTER               | 0.909                                                        | 1.761                          | 985.77             | 1735.57            | 1.600                          | 798.92             | 1278.50            |
| A_68_P26161391 | chr8:112741858-112741902                          | NM_146215:21       | Ftsjd1        | INSIDE                 | 0.909                                                        | 1.633                          | 1996.24            | 3260.66            | 1.484                          | 1509.42            | 2240.03            |
| A_68_P29625743 | chr14:57655656-57655700                           | NM_016975:21104    | Gja3          | INSIDE                 | 0.909                                                        | 3.413                          | 1377.89            | 4702.19            | 3.101                          | 1178.94            | 3655.34            |
| A_68_P26972773 | chr10:17667513-17667557                           | NM_001033432:339   | Heca          | INSIDE                 | 0.909                                                        | 1.907                          | 736.48             | 1404.12            | 1.732                          | 745.59             | 1291.66            |
| A_68_P31114337 | chr17:27250538-27250582                           | NM_080553:56312    | Itpr3         | INSIDE                 | 0.909                                                        | 1.969                          | 1001.53            | 1972.40            | 1.790                          | 941.90             | 1685.78            |
| A_68_P22530128 | chr3:130809594-130809638                          | NM_010703:-3772    | Lef1          | PROMOTER               | 0.909                                                        | 1.676                          | 908.56             | 1522.81            | 1.523                          | 779.62             | 1187.66            |
| A_68_P21817705 | chr2:164240088-164240132                          | NM_013592:-9996    | Matn4         | PROMOTER               | 0.909                                                        | 2.218                          | 2413.48            | 5353.73            | 2.017                          | 1752.76            | 3535.70            |
| A_68_P32466325 | chrX:71330416-71330460                            | NM_010788:494      | Mecp2         | INSIDE                 | 0.909                                                        | 2.086                          | 2623.90            | 5474.29            | 1.896                          | 1715.46            | 3252.78            |
| A_68_P27944883 | chr11:78510477-78510521                           | NM_008702:429      | Nik           | INSIDE                 | 0.909                                                        | 1.523                          | 2650.19            | 4035.83            | 1.384                          | 2052.07            | 2839.85            |
| A_68_P30558434 | chr16:13668204-13668248                           | NM_028761:37       | Parn          | INSIDE                 | 0.909                                                        | 0.668                          | 1822.33            | 1217.49            | 0.607                          | 1324.03            | 803.90             |
| A_68_P24983897 | chr7:17492695-17492739                            | NM_008967:878      | Ptgir         | INSIDE                 | 0.909                                                        | 2.573                          | 547.58             | 1408.99            | 2.338                          | 467.01             | 1092.00            |
| A_68_P28322713 | chr12:30623311-30623355                           | NM_181395:432      | Pxdn          | INSIDE                 | 0.909                                                        | 2.156                          | 1897.49            | 4091.68            | 1.961                          | 1481.79            | 2905.50            |
| A_68_P22347939 | chr3:95976249-95976293                            | NM_153053:-202     | Sf3b4         | PROMOTER               | 0.909                                                        | 0.535                          | 1186.04            | 634.86             | 0.487                          | 872.25             | 424.46             |
| A_68_P25962756 | chr8:75273840-75273884                            | NM_009188:26676    | Sin3b         | INSIDE                 | 0.909                                                        | 3.118                          | 851.47             | 2655.29            | 2.835                          | 739.59             | 2097.00            |
| A_68_P27833774 | chr11:58775271-58775315                           | NM_031172:-1990    | Trim17        | PROMOTER               | 0.909                                                        | 1.774                          | 1945.03            | 3450.16            | 1.613                          | 1429.05            | 2304.92            |
| A_68_P23984176 | chr5:111612120-111612164                          | NM_024477:303321   | Ttc28         | INSIDE                 | 0.909                                                        | 2.073                          | 899.00             | 1863.63            | 1.884                          | 771.92             | 1454.45            |
| A_68_P30668283 | chr16:35156994-35157038                           | NM_001012765:1295  | Adecy5        | INSIDE                 | 0.908                                                        | 1.952                          | 933.76             | 1822.48            | 1.772                          | 761.45             | 1349.46            |
| A_68_P28115698 | chr11:108783986-108784030                         | NM_015732:2346     | Axin2         | INSIDE                 | 0.908                                                        | 0.551                          | 1565.96            | 863.45             | 0.501                          | 1274.13            | 638.17             |
| A_68_P26170009 | chr8:114267322-114267366                          | NM_009954:405      | Bear1         | INSIDE                 | 0.908                                                        | 0.713                          | 2571.24            | 1832.86            | 0.647                          | 2060.27            | 1333.80            |
| A_68_P28778249 | chr12:119437163-119437207                         | NM_010060:332      | Dnahc11       | INSIDE                 | 0.908                                                        | 0.645                          | 1768.75            | 1140.10            | 0.585                          | 1504.64            | 880.82             |
| A_68_P24591568 | chr6:83072012-83072056                            | NM_023547:2989     | Ino80b        | INSIDE                 | 0.908                                                        | 0.613                          | 2332.76            | 1430.36            | 0.557                          | 1833.55            | 1020.97            |
| A_68_P21019040 | chr2:13976882-13976926                            | NM_001012396:758   | Ptpla         | INSIDE                 | 0.908                                                        | 0.725                          | 2669.08            | 1935.24            | 0.658                          | 2280.55            | 1501.13            |

| ProbeName      | Target position of probe on CpG island microarray | TargetID                 | GeneSymbol    | CpG island Description | Ratio of relative methylation (TiO <sub>2</sub> -NP/Vehicle) | Sham group                     |                    |                    | TiO <sub>2</sub> -H group      |                    |                    |
|----------------|---------------------------------------------------|--------------------------|---------------|------------------------|--------------------------------------------------------------|--------------------------------|--------------------|--------------------|--------------------------------|--------------------|--------------------|
|                |                                                   |                          |               |                        |                                                              | Relative methylation (Cy5/Cy3) | Cy3 signal (Input) | Cy5 signal (MeDIP) | Relative methylation (Cy5/Cy3) | Cy3 signal (Input) | Cy5 signal (MeDIP) |
| A_68_P25090599 | chr7:52262741-52262785                            | NM_001008422:8857        | Scaf1         | INSIDE                 | 0.908                                                        | 2.559                          | 2295.19            | 5874.15            | 2.324                          | 1620.01            | 3765.56            |
| A_68_P28184908 | chr11:120353660-120353704                         | NM_013770:532            | Sle25a10      | INSIDE                 | 0.908                                                        | 0.616                          | 1668.99            | 1027.60            | 0.559                          | 1251.74            | 699.69             |
| A_68_P23541736 | chr5:23931307-23931351                            | NM_009207:279            | Sle4a2        | INSIDE                 | 0.908                                                        | 0.395                          | 1683.88            | 665.86             | 0.359                          | 1530.19            | 549.44             |
| A_68_P23364328 | chr4:141035058-141035110                          | NM_019763:59428          | Spen          | INSIDE                 | 0.908                                                        | 2.938                          | 388.35             | 1140.81            | 2.667                          | 331.92             | 885.26             |
| A_68_P28034316 | chr11:94538398-94538442                           | NM_145828:387            | Xylt2         | INSIDE                 | 0.908                                                        | 2.566                          | 1878.56            | 4820.87            | 2.330                          | 1638.79            | 3818.57            |
| A_68_P26037061 | chr8:90304956-90305000                            | NM_033327:178516         | Zfp423        | INSIDE                 | 0.908                                                        | 2.265                          | 742.47             | 1681.34            | 2.057                          | 693.16             | 1426.02            |
| A_68_P21812331 | chr2:163245232-163245276                          | NM_025699:-48            | 3230401D17Rik | PROMOTER               | 0.907                                                        | 0.663                          | 1874.69            | 1243.38            | 0.602                          | 1543.60            | 928.67             |
| A_68_P31939556 | chr19:7457214-7457258                             | NM_001033139:280         | AI846148      | INSIDE                 | 0.907                                                        | 0.396                          | 1586.15            | 628.36             | 0.359                          | 1246.60            | 447.79             |
| A_68_P24248437 | chr6:13627972-13628016                            | NM_175312:-28            | B630005N14Rik | PROMOTER               | 0.907                                                        | 0.692                          | 2585.36            | 1789.63            | 0.628                          | 1903.83            | 1195.83            |
| A_68_P23391997 | chr4:147412754-147412798                          | NM_011929:100            | Clcn6         | INSIDE                 | 0.907                                                        | 2.323                          | 8775.74            | 20383.07           | 2.107                          | 6035.76            | 12718.59           |
| A_68_P25951438 | chr8:72898648-72898692                            | NM_016685:1224           | Comp          | INSIDE                 | 0.907                                                        | 2.032                          | 1190.57            | 2419.66            | 1.843                          | 1090.65            | 2010.15            |
| A_68_P24138652 | chr5:140448047-140448091                          | NM_175522:64172          | Elfn1         | INSIDE                 | 0.907                                                        | 1.636                          | 1748.14            | 2860.58            | 1.484                          | 1296.65            | 1923.62            |
| A_68_P25181442 | chr7:72300864-72300908                            | NM_183087:528            | Fam189a1      | INSIDE                 | 0.907                                                        | 1.704                          | 1346.92            | 2294.50            | 1.545                          | 1256.31            | 1940.80            |
| A_68_P22325240 | chr3:90237336-90237380                            | NM_145540:200            | Ints3         | INSIDE                 | 0.907                                                        | 0.731                          | 3096.03            | 2264.53            | 0.663                          | 2335.88            | 1549.27            |
| A_68_P30346608 | chr15:76011006-76011051                           | NM_201394:15112          | Plec          | INSIDE                 | 0.907                                                        | 3.573                          | 300.62             | 1074.11            | 3.240                          | 271.39             | 879.35             |
| A_68_P21870545 | chr2:173412385-173412429                          | NR_027957:72634          | Ppp4r1l-ps    | INSIDE                 | 0.907                                                        | 2.570                          | 582.18             | 1495.94            | 2.330                          | 563.48             | 1312.99            |
| A_68_P31209386 | chr17:47026859-47026903                           | NM_178385:-689           | Tbcc          | PROMOTER               | 0.907                                                        | 0.685                          | 2550.38            | 1747.93            | 0.622                          | 2038.89            | 1267.68            |
| A_68_P32557247 | chrX:97016551-97016595                            | NM_001081283:165         | Tmem28        | INSIDE                 | 0.907                                                        | 1.859                          | 752.17             | 1398.16            | 1.685                          | 448.35             | 755.63             |
| A_68_P32707836 | chrX:138824951-138824995                          | NM_001033600:106         | Acsl4         | INSIDE                 | 0.906                                                        | 2.755                          | 794.68             | 2188.96            | 2.495                          | 395.71             | 987.47             |
| A_68_P21105431 | chr2:30679624-30679668                            | NM_133346:4174           | Asb6          | INSIDE                 | 0.906                                                        | 2.312                          | 353.79             | 818.00             | 2.095                          | 303.06             | 634.88             |
| A_68_P21566912 | chr2:118741928-118741972                          | NM_001045523:14600       | Bahd1         | INSIDE                 | 0.906                                                        | 2.900                          | 1093.85            | 3172.31            | 2.627                          | 900.69             | 2366.29            |
| A_68_P27258522 | chr10:75227236-75227280                           | NM_172549:-156           | Cabin1        | PROMOTER               | 0.906                                                        | 2.163                          | 7305.06            | 15800.65           | 1.959                          | 6322.41            | 12388.58           |
| A_68_P30822066 | chr16:64852004-64852048                           | NM_178647:116            | Cggbp1        | INSIDE                 | 0.906                                                        | 1.861                          | 502.75             | 935.83             | 1.686                          | 503.16             | 848.20             |
| A_68_P29086260 | chr13:60703649-60703693                           | NM_134062:99             | Dapk1         | INSIDE                 | 0.906                                                        | 0.689                          | 1900.58            | 1310.34            | 0.624                          | 1481.97            | 925.31             |
| A_68_P28737545 | chr12:111517127-111517171                         | NM_172119:-291           | Dio3          | DIVERGENT_PROMOTER     | 0.906                                                        | 0.584                          | 2005.42            | 1170.28            | 0.529                          | 1681.27            | 888.68             |
| A_68_P24046861 | chr5:122298939-122298983                          | NM_175474:-76            | Fam109a       | PROMOTER               | 0.906                                                        | 1.564                          | 2577.92            | 4032.65            | 1.418                          | 2161.26            | 3064.60            |
| A_68_P23317857 | chr4:133042635-133042679                          | NM_175307:6609           | Fam46b        | INSIDE                 | 0.906                                                        | 2.028                          | 886.69             | 1798.38            | 1.838                          | 688.39             | 1265.27            |
| A_68_P29976940 | chr15:3929308-3929352                             | NM_134099:243            | Fbxo4         | INSIDE                 | 0.906                                                        | 1.989                          | 508.18             | 1010.70            | 1.802                          | 516.88             | 931.16             |
| A_68_P23582143 | chr5:32435937-32435982                            | NM_008037:-2885          | Fosl2         | PROMOTER               | 0.906                                                        | 1.991                          | 4053.18            | 8070.65            | 1.803                          | 2564.52            | 4623.98            |
| A_68_P23451688 | chr5:4757569-4757613                              | NM_021457:626            | Fzd1          | INSIDE                 | 0.906                                                        | 0.703                          | 1243.83            | 873.91             | 0.637                          | 1152.83            | 734.12             |
| A_68_P20156379 | chr1:37932274-37932318                            | NM_001037918:3246        | Lipt1         | INSIDE                 | 0.906                                                        | 3.342                          | 1954.19            | 6530.44            | 3.028                          | 1374.07            | 4160.95            |
| A_68_P31217292 | chr17:48548926-48548970                           | NM_001110832:197         | NfyA          | INSIDE                 | 0.906                                                        | 0.632                          | 3533.57            | 2231.54            | 0.572                          | 2749.24            | 1573.47            |
| A_68_P27290118 | chr10:80961853-80961897                           | NM_010102:1008           | S1pr4         | INSIDE                 | 0.906                                                        | 2.200                          | 1741.43            | 3831.92            | 1.993                          | 1381.49            | 2753.88            |
| A_68_P26885412 | chr9:121671713-121671757                          | NM_001166644:2584        | Zfp651        | INSIDE                 | 0.906                                                        | 1.948                          | 1133.07            | 2206.85            | 1.766                          | 827.12             | 1460.32            |
| A_68_P28092303 | chr11:104547246-104547290                         | ENSMUST00000148007:248   |               | INSIDE                 | 0.906                                                        | 2.010                          | 534.15             | 1073.54            | 1.820                          | 485.49             | 883.83             |
| A_68_P27228311 | chr10:69652022-69652071                           | NM_001111121:92178       | Cecdc6        | INSIDE                 | 0.905                                                        | 2.857                          | 1630.69            | 4659.48            | 2.585                          | 1336.94            | 3456.22            |
| A_68_P23203727 | chr4:109650158-109650202                          | NM_172296:-449           | Dmrta2        | PROMOTER               | 0.905                                                        | 0.388                          | 2052.51            | 796.11             | 0.351                          | 1531.56            | 537.35             |
| A_68_P24133858 | chr5:139625772-139625819                          | NM_001081265:-381        | Heat2         | PROMOTER               | 0.905                                                        | 10.675                         | 1522.33            | 16250.91           | 9.660                          | 739.67             | 7145.52            |
| A_68_P27804076 | chr11:53113307-53113351                           | NM_008300:653            | Hspa4         | INSIDE                 | 0.905                                                        | 0.474                          | 1240.25            | 587.97             | 0.429                          | 1155.47            | 495.84             |
| A_68_P21148580 | chr2:38367238-38367282                            | NM_001159631:-135        | Nek6          | PROMOTER               | 0.905                                                        | 2.049                          | 513.90             | 1052.73            | 1.854                          | 478.03             | 886.06             |
| A_68_P24755177 | chr6:112646572-112646616                          | NM_001167730:70          | Rad18         | INSIDE                 | 0.905                                                        | 0.676                          | 3400.51            | 2297.13            | 0.612                          | 2775.26            | 1697.42            |
| A_68_P27045329 | chr10:31328483-31328527                           | NM_001146349:1027        | Rnf217        | INSIDE                 | 0.905                                                        | 0.699                          | 1813.12            | 1266.87            | 0.632                          | 1643.81            | 1039.44            |
| A_68_P26504535 | chr9:50411810-50411854                            | NM_025848:122            | Sdhc          | INSIDE                 | 0.905                                                        | 0.618                          | 1345.33            | 831.18             | 0.559                          | 1101.25            | 615.85             |
| A_68_P20970770 | chr2:4802809-4802853                              | NM_175400:221            | Seps1         | INSIDE                 | 0.905                                                        | 2.107                          | 410.64             | 865.22             | 1.907                          | 444.75             | 848.33             |
| A_68_P27392327 | chr10:99950250-99950294                           | NM_001110013:-291        | Tmtc3         | DIVERGENT_PROMOTER     | 0.905                                                        | 0.714                          | 1948.72            | 1392.34            | 0.646                          | 1649.39            | 1066.13            |
| A_68_P25589082 | chr7:148661081-148661125                          | NM_053082:-36            | Tspan4        | DIVERGENT_PROMOTER     | 0.905                                                        | 0.735                          | 2592.32            | 1904.80            | 0.665                          | 1966.21            | 1306.94            |
| A_68_P29998080 | chr15:8049104-8049148                             | NM_001081402:83          | Wdr70         | INSIDE                 | 0.905                                                        | 0.636                          | 3185.56            | 2025.95            | 0.575                          | 2715.84            | 1562.79            |
| A_68_P29339698 | chr13:114083264-114083308                         |                          | Unknown       | Unknown                | 0.905                                                        | 1.663                          | 1699.17            | 2826.00            | 1.504                          | 1343.05            | 2020.54            |
| A_68_P27283430 | chr10:79934572-79934616                           | ENSMUST00000158603:-4502 |               | PROMOTER               | 0.905                                                        | 1.944                          | 3361.98            | 6536.15            | 1.760                          | 2444.37            | 4303.02            |
| A_68_P30480392 | chr15:99304984-99305028                           | NM_029236:155            | Bcdin3d       | INSIDE                 | 0.904                                                        | 1.722                          | 883.64             | 1521.24            | 1.556                          | 645.36             | 1004.00            |
| A_68_P22394779 | chr3:104855704-104855748                          | NM_001163332:145         | Cttnbp2nl     | INSIDE                 | 0.904                                                        | 0.370                          | 1552.02            | 574.19             | 0.334                          | 1356.59            | 453.68             |

| ProbeName      | Target position of probe on CpG island microarray | TargetID                | GeneSymbol    | CpG island Description | Ratio of relative methylation (TiO <sub>2</sub> -NP/Vehicle) | Sham group                     |                    |                    | TiO <sub>2</sub> -H group      |                    |                    |
|----------------|---------------------------------------------------|-------------------------|---------------|------------------------|--------------------------------------------------------------|--------------------------------|--------------------|--------------------|--------------------------------|--------------------|--------------------|
|                |                                                   |                         |               |                        |                                                              | Relative methylation (Cy5/Cy3) | Cy3 signal (Input) | Cy5 signal (MeDIP) | Relative methylation (Cy5/Cy3) | Cy3 signal (Input) | Cy5 signal (MeDIP) |
| A_68_P28248077 | chr12:13255581-13255625                           | NM_134040:378           | Ddx1          | INSIDE                 | 0.904                                                        | 0.703                          | 1863.96            | 1309.78            | 0.635                          | 1289.02            | 818.79             |
| A_68_P30591036 | chr16:21214742-21214786                           | NM_010143:9897          | Ephb3         | INSIDE                 | 0.904                                                        | 2.117                          | 544.65             | 1153.15            | 1.915                          | 489.24             | 936.86             |
| A_68_P26525031 | chr9:54134407-54134451                            | NM_177350:136           | Gldn          | INSIDE                 | 0.904                                                        | 1.911                          | 491.41             | 938.89             | 1.727                          | 483.51             | 835.00             |
| A_68_P28048330 | chr11:96903095-96903139                           | NM_026154:217           | Mrpl10        | INSIDE                 | 0.904                                                        | 0.607                          | 1074.06            | 652.45             | 0.549                          | 860.68             | 472.57             |
| A_68_P31553011 | chr18:23199794-23199838                           | NM_001161483:-2652      | Nol4          | PROMOTER               | 0.904                                                        | 1.994                          | 1599.86            | 3190.22            | 1.803                          | 1407.92            | 2538.13            |
| A_68_P31438303 | chr17:90854426-90854470                           | NM_020252:637694        | Nrxn1         | INSIDE                 | 0.904                                                        | 0.424                          | 1332.23            | 564.50             | 0.383                          | 1057.41            | 405.00             |
| A_68_P29479232 | chr14:26513832-26513876                           | NM_134084:199           | Ppif          | INSIDE                 | 0.904                                                        | 0.637                          | 1020.39            | 650.41             | 0.576                          | 869.78             | 500.94             |
| A_68_P32020395 | chr19:23967551-23967595                           | NM_177034:134207        | Apba1         | INSIDE                 | 0.903                                                        | 2.464                          | 943.55             | 2325.28            | 2.226                          | 1008.25            | 2244.67            |
| A_68_P26459693 | chr9:42914668-42914712                            | NM_027144:-889          | Arhgef12      | PROMOTER               | 0.903                                                        | 0.557                          | 1284.33            | 715.07             | 0.503                          | 1026.73            | 516.44             |
| A_68_P23541451 | chr5:23893582-23893626                            | NM_001002897:4357       | Atg9b         | INSIDE                 | 0.903                                                        | 0.607                          | 1083.47            | 657.93             | 0.548                          | 891.06             | 488.67             |
| A_68_P30371304 | chr15:80118357-80118401                           | NM_001044308:711        | Caena1i       | INSIDE                 | 0.903                                                        | 0.574                          | 1227.16            | 704.92             | 0.518                          | 974.57             | 505.26             |
| A_68_P31715219 | chr18:53904261-53904305                           | NM_178686:-81           | Cep120        | PROMOTER               | 0.903                                                        | 0.715                          | 2087.69            | 1493.30            | 0.646                          | 1624.30            | 1049.36            |
| A_68_P27186923 | chr10:62065160-62065204                           | NM_019553:-136          | Ddx21         | PROMOTER               | 0.903                                                        | 0.433                          | 1536.72            | 665.65             | 0.391                          | 1159.76            | 453.82             |
| A_68_P25495195 | chr7:132695872-132695916                          | NM_001008700:99         | Il4ra         | INSIDE                 | 0.903                                                        | 1.675                          | 2603.14            | 4359.57            | 1.513                          | 2092.22            | 3164.90            |
| A_68_P29616401 | chr14:55732942-55732986                           | NM_177049:2808          | Jph4          | INSIDE                 | 0.903                                                        | 1.665                          | 910.41             | 1516.24            | 1.504                          | 819.24             | 1232.47            |
| A_68_P27425028 | chr10:106709567-106709611                         | NM_001033223:702        | Lin7a         | INSIDE                 | 0.903                                                        | 2.113                          | 494.63             | 1045.37            | 1.908                          | 464.65             | 886.69             |
| A_68_P25574331 | chr7:146022127-146022171                          | NM_001045483:15802      | Mapk1ip1      | DOWNSTREAM             | 0.903                                                        | 1.898                          | 2004.32            | 3804.27            | 1.713                          | 1629.68            | 2792.29            |
| A_68_P26349890 | chr9:21792524-21792568                            | NM_023622:1351          | Rgl3          | INSIDE                 | 0.903                                                        | 0.568                          | 1475.03            | 838.36             | 0.513                          | 1197.76            | 614.81             |
| A_68_P22393170 | chr3:104591895-104591939                          | NM_007484:-35           | Rhoc          | PROMOTER               | 0.903                                                        | 1.881                          | 596.53             | 1122.31            | 1.699                          | 537.18             | 912.78             |
| A_68_P26430601 | chr9:37237135-37237179                            | NM_001164767:3604       | Robo3         | INSIDE                 | 0.903                                                        | 2.151                          | 1497.53            | 3220.60            | 1.943                          | 1137.22            | 2209.24            |
| A_68_P21101134 | chr2:29922658-29922702                            | NM_001204875:687        | Set           | INSIDE                 | 0.903                                                        | 0.608                          | 1618.39            | 983.76             | 0.549                          | 1283.71            | 704.91             |
| A_68_P27549890 | chr10:129881898-129881942                         | NM_001103365:11030      | Vmn2r86       | DOWNSTREAM             | 0.903                                                        | 3.186                          | 366.71             | 1168.41            | 2.876                          | 357.92             | 1029.36            |
| A_68_P21113503 | chr2:31993634-31993679                            |                         | Unknown       |                        | 0.903                                                        | 2.446                          | 257.61             | 630.19             | 2.208                          | 237.53             | 524.56             |
| A_68_P22048260 | chr3:34353370-34353414                            |                         | Unknown       |                        | 0.903                                                        | 1.891                          | 1781.39            | 3368.16            | 1.707                          | 1383.72            | 2362.60            |
| A_68_P33005942 | A_68_P33005942                                    |                         | Unknown       |                        | 0.903                                                        | 4.743                          | 113.68             | 539.15             | 4.283                          | 107.72             | 461.42             |
| A_68_P24784500 | chr6:117961807-117961851                          | ENSMUST00000032230:437  |               | INSIDE                 | 0.903                                                        | 0.668                          | 1435.10            | 958.74             | 0.603                          | 1309.60            | 789.95             |
| A_68_P31305846 | chr17:66728820-66728864                           | NM_001114098:70248      | 1110012J17Rik | INSIDE                 | 0.902                                                        | 2.008                          | 1910.28            | 3836.62            | 1.811                          | 1495.39            | 2708.51            |
| A_68_P26248108 | chr8:127386840-127386884                          | NM_025615:67            | 2810004N23Rik | INSIDE                 | 0.902                                                        | 0.727                          | 2122.54            | 1542.62            | 0.655                          | 1554.36            | 1018.71            |
| A_68_P22407413 | chr3:107399619-107399663                          | NM_007441:1692          | Aix3          | INSIDE                 | 0.902                                                        | 0.538                          | 1989.04            | 1069.92            | 0.485                          | 1645.56            | 798.83             |
| A_68_P27535079 | chr10:126727356-126727401                         | NM_007837:-470          | Ddit3         | DIVERGENT_PROMOTER     | 0.902                                                        | 2.347                          | 2221.75            | 5214.23            | 2.117                          | 1498.84            | 3173.13            |
| A_68_P23981088 | chr5:111082625-111082669                          | NM_027156:177           | Ddx51         | INSIDE                 | 0.902                                                        | 0.552                          | 1720.43            | 949.02             | 0.498                          | 1508.03            | 750.33             |
| A_68_P22582960 | chr3:140874546-140874590                          | NM_008811:751           | Pdha2         | INSIDE                 | 0.902                                                        | 2.385                          | 1033.07            | 2463.77            | 2.150                          | 879.31             | 1890.70            |
| A_68_P26238678 | chr8:125759558-125759602                          | NM_030176:529           | Spata2L       | INSIDE                 | 0.902                                                        | 0.646                          | 1285.20            | 830.44             | 0.583                          | 1030.59            | 600.50             |
| A_68_P25094660 | chr7:52968835-52968879                            | NM_020011:1721          | Sphk2         | INSIDE                 | 0.902                                                        | 3.189                          | 1211.78            | 3863.88            | 2.877                          | 940.44             | 2705.92            |
| A_68_P30792109 | chr16:58523405-58523449                           | NM_018784:-1            | St3gal6       | PROMOTER               | 0.902                                                        | 0.701                          | 1841.04            | 1290.41            | 0.632                          | 1504.53            | 951.14             |
| A_68_P31187138 | chr17:43154011-43154055                           | NM_178589:529           | Tnfrsf21      | INSIDE                 | 0.902                                                        | 0.647                          | 902.73             | 584.02             | 0.584                          | 824.56             | 481.17             |
| A_68_P24153574 | chr5:143581988-143582032                          | NM_001122730:-2944      | Tnrc18        | PROMOTER               | 0.902                                                        | 1.942                          | 2678.39            | 5201.19            | 1.751                          | 2110.42            | 3695.86            |
| A_68_P20804316 | chr1:169215214-169215258                          | NM_030724:22            | Uck2          | INSIDE                 | 0.902                                                        | 0.533                          | 1248.47            | 665.67             | 0.481                          | 1113.48            | 535.48             |
| A_68_P24974110 | chr7:13593210-13593254                            | NM_001024699:1917       | Zbtb45        | INSIDE                 | 0.902                                                        | 2.045                          | 2511.70            | 5136.71            | 1.844                          | 2214.64            | 4084.48            |
| A_68_P25379198 | chr7:109661711-109661755                          | ENSMUST00000097222:7806 |               | DOWNSTREAM             | 0.902                                                        | 2.439                          | 1320.62            | 3221.37            | 2.199                          | 1165.99            | 2564.30            |
| A_68_P23637947 | chr5:42235776-42235820                            | NM_001081422:-244       | Bod11         | PROMOTER               | 0.901                                                        | 2.309                          | 388.61             | 897.37             | 2.080                          | 395.00             | 821.58             |
| A_68_P25582099 | chr7:147256517-147256561                          | NM_001190386:11662      | Caly          | INSIDE                 | 0.901                                                        | 2.346                          | 2170.02            | 5090.76            | 2.114                          | 1610.82            | 3405.00            |
| A_68_P30589272 | chr16:20733318-20733362                           | NM_009893:141           | Chrd          | INSIDE                 | 0.901                                                        | 2.224                          | 921.15             | 2048.58            | 2.003                          | 723.35             | 1448.94            |
| A_68_P24000793 | chr5:114358500-114358544                          | NM_011779:193           | Coro1c        | INSIDE                 | 0.901                                                        | 3.678                          | 493.88             | 1816.37            | 3.314                          | 528.25             | 1750.75            |
| A_68_P20456055 | chr1:95408562-95408606                            | NM_145519:-96           | Farp2         | PROMOTER               | 0.901                                                        | 0.592                          | 1047.66            | 619.92             | 0.533                          | 927.51             | 494.68             |
| A_68_P23591963 | chr5:34325816-34325860                            | NM_001033458:-284       | Gm1673        | PROMOTER               | 0.901                                                        | 0.680                          | 1493.76            | 1015.53            | 0.612                          | 1125.13            | 688.85             |
| A_68_P30490485 | chr15:101062094-101062138                         | NM_019518:7479          | Grasp         | INSIDE                 | 0.901                                                        | 2.236                          | 1736.64            | 3882.73            | 2.015                          | 1316.52            | 2652.36            |
| A_68_P26622299 | chr9:71333296-71333340                            | NM_001164793:-553       | Grin1a        | PROMOTER               | 0.901                                                        | 2.436                          | 960.07             | 2338.90            | 2.194                          | 927.00             | 2034.27            |
| A_68_P30547090 | chr16:11254627-11254671                           | NR_035466:-110          | Mir1945       | PROMOTER               | 0.901                                                        | 0.648                          | 1850.35            | 1199.02            | 0.584                          | 1587.98            | 927.44             |
| A_68_P26884592 | chr9:121551542-121551586                          | NM_011703:-269          | Vipr1         | DIVERGENT_PROMOTER     | 0.901                                                        | 0.544                          | 1221.70            | 664.47             | 0.490                          | 1002.70            | 491.16             |
| A_68_P31206541 | chr17:46521167-46521211                           | NM_207671:474           | Zfp318        | INSIDE                 | 0.901                                                        | 1.709                          | 772.27             | 1319.66            | 1.540                          | 796.07             | 1226.29            |

| ProbeName      | Target position of probe on CpG island microarray | TargetID                 | GeneSymbol    | CpG island Description | Ratio of relative methylation (TiO <sub>2</sub> -NP/Vehicle) | Sham group                     |                    |                    | TiO <sub>2</sub> -H group      |                    |                    |
|----------------|---------------------------------------------------|--------------------------|---------------|------------------------|--------------------------------------------------------------|--------------------------------|--------------------|--------------------|--------------------------------|--------------------|--------------------|
|                |                                                   |                          |               |                        |                                                              | Relative methylation (Cy5/Cy3) | Cy3 signal (Input) | Cy5 signal (MeDIP) | Relative methylation (Cy5/Cy3) | Cy3 signal (Input) | Cy5 signal (MeDIP) |
| A_68_P25614225 | chr8:3495864-3495908                              | NM_080461:2749           | Zfp358        | INSIDE                 | 0.901                                                        | 4.545                          | 642.47             | 2919.93            | 4.093                          | 572.13             | 2341.82            |
| A_68_P22283295 | chr3:82932608-82932652                            | ENSMUST00000047876:538   |               | INSIDE                 | 0.901                                                        | 1.714                          | 736.83             | 1263.15            | 1.544                          | 630.15             | 973.10             |
| A_68_P27288864 | chr10:80785360-80785404                           | NM_027381:1535           | 2510012108Rik | INSIDE                 | 0.900                                                        | 2.937                          | 293.82             | 863.01             | 2.644                          | 274.55             | 725.94             |
| A_68_P31731123 | chr18:56732742-56732786                           | NM_001127338:-171        | Aldh7a1       | PROMOTER               | 0.900                                                        | 0.493                          | 1137.97            | 560.60             | 0.443                          | 887.95             | 393.67             |
| A_68_P28183243 | chr11:120097692-120097736                         | NM_198423:3454           | Bahcc1        | INSIDE                 | 0.900                                                        | 0.639                          | 2039.68            | 1303.20            | 0.575                          | 1578.37            | 907.40             |
| A_68_P26486126 | chr9:47339043-47339087                            | NM_001025600:630         | Cadm1         | INSIDE                 | 0.900                                                        | 0.563                          | 2852.15            | 1605.16            | 0.507                          | 2135.41            | 1081.73            |
| A_68_P23202005 | chr4:109338819-109338863                          | NM_007671:-863           | Cdkn2c        | PROMOTER               | 0.900                                                        | 0.545                          | 1437.43            | 783.03             | 0.490                          | 1076.21            | 527.60             |
| A_68_P21144120 | chr2:37642065-37642109                            | NM_001163566:10318       | Crb2          | INSIDE                 | 0.900                                                        | 2.021                          | 477.45             | 965.13             | 1.819                          | 458.74             | 834.29             |
| A_68_P25098704 | chr7:53632208-53632252                            | NM_010866:387            | Myod1         | INSIDE                 | 0.900                                                        | 0.679                          | 1345.36            | 913.65             | 0.611                          | 1097.88            | 670.94             |
| A_68_P23134165 | chr4:97418263-97418307                            | NM_001122952:169651      | Nfia          | INSIDE                 | 0.900                                                        | 0.661                          | 1100.36            | 727.53             | 0.595                          | 912.53             | 542.95             |
| A_68_P21585951 | chr2:122174819-122174863                          | NM_001013829:19814       | Shf           | INSIDE                 | 0.900                                                        | 2.019                          | 691.97             | 1396.89            | 1.816                          | 601.03             | 1091.52            |
| A_68_P26983374 | chr10:19570550-19570594                           | NM_029529:693            | Sle35d3       | INSIDE                 | 0.900                                                        | 1.575                          | 1408.52            | 2217.98            | 1.418                          | 1236.93            | 1753.54            |
| A_68_P24320419 | chr6:28430125-28430169                            | NM_019776:-201           | Snd1          | PROMOTER               | 0.900                                                        | 2.586                          | 1223.49            | 3163.65            | 2.327                          | 1010.25            | 2350.64            |
| A_68_P32109308 | chr19:40587948-40587992                           | NM_178362:256            | Sorbs1        | INSIDE                 | 0.900                                                        | 0.645                          | 1287.29            | 829.66             | 0.580                          | 1027.77            | 596.23             |
| A_68_P20914290 | chr1:189431183-189431227                          | ENSMUST00000127489:-1465 |               | PROMOTER               | 0.900                                                        | 0.699                          | 2367.05            | 1653.64            | 0.629                          | 1842.90            | 1158.96            |
| A_68_P21179669 | chr2:44783090-44783134                            | ENSMUST00000129240:-328  |               | PROMOTER               | 0.900                                                        | 1.895                          | 865.95             | 1641.34            | 1.706                          | 858.74             | 1511.24            |
| A_68_P24050675 | chr5:122951393-122951437                          | NM_009722:820            | Atp2a2        | INSIDE                 | 0.899                                                        | 0.618                          | 948.84             | 586.12             | 0.555                          | 880.06             | 488.51             |
| A_68_P32260365 | chrX:11667413-11667459                            | NM_029510:-9757          | Bcor          | PROMOTER               | 0.899                                                        | 0.565                          | 1720.60            | 972.22             | 0.508                          | 787.97             | 400.48             |
| A_68_P31227868 | chr17:50432726-50432770                           | NM_010021:176            | Dazl          | INSIDE                 | 0.899                                                        | 2.452                          | 462.45             | 1134.09            | 2.204                          | 444.40             | 979.31             |
| A_68_P20553864 | chr1:120734165-120734209                          | NM_001081125:216010      | Gli2          | INSIDE                 | 0.899                                                        | 2.520                          | 727.31             | 1832.81            | 2.266                          | 716.99             | 1625.05            |
| A_68_P25362936 | chr7:106774598-106774642                          | NM_001195529:993         | Gm4980        | INSIDE                 | 0.899                                                        | 1.972                          | 446.92             | 881.38             | 1.773                          | 446.42             | 791.68             |
| A_68_P25031176 | chr7:31140849-31140896                            | NM_175478:6919           | Lrfn3         | INSIDE                 | 0.899                                                        | 3.149                          | 478.42             | 1506.49            | 2.832                          | 405.84             | 1149.19            |
| A_68_P31050850 | chr17:12464627-12464673                           | NM_011948:46876          | Map3k4        | INSIDE                 | 0.899                                                        | 1.679                          | 965.89             | 1621.77            | 1.509                          | 681.93             | 1029.26            |
| A_68_P25223253 | chr7:79451535-79451579                            | NM_001024703:-75         | Mctp2         | PROMOTER               | 0.899                                                        | 2.467                          | 417.02             | 1028.97            | 2.217                          | 456.80             | 1012.71            |
| A_68_P29226006 | chr13:93614678-93614722                           | NM_001162945:-41         | Mtx3          | PROMOTER               | 0.899                                                        | 2.326                          | 476.87             | 1109.03            | 2.091                          | 418.70             | 875.50             |
| A_68_P21843327 | chr2:168578173-168578217                          | NM_175303:14507          | Sall4         | INSIDE                 | 0.899                                                        | 1.989                          | 526.47             | 1047.37            | 1.788                          | 448.48             | 801.69             |
| A_68_P26983368 | chr10:19569800-19569844                           | NM_029529:1443           | Sle35d3       | INSIDE                 | 0.899                                                        | 0.555                          | 1517.26            | 841.51             | 0.498                          | 1246.99            | 621.42             |
| A_68_P26239285 | chr8:125856857-125856901                          | NM_172287:266            | Spire2        | INSIDE                 | 0.899                                                        | 0.401                          | 2039.35            | 817.12             | 0.360                          | 1666.75            | 600.40             |
| A_68_P30360707 | chr15:78370109-78370155                           | NM_009218:4643           | Sstr3         | INSIDE                 | 0.899                                                        | 1.974                          | 1226.45            | 2421.06            | 1.774                          | 975.72             | 1731.41            |
| A_68_P27290697 | chr10:81050580-81050624                           | NM_019725:12326          | Tie2          | INSIDE                 | 0.899                                                        | 1.789                          | 979.04             | 1751.51            | 1.607                          | 858.15             | 1379.43            |
| A_68_P24974294 | chr7:13623604-13623648                            | NM_001168469:-7          | Ube2m         | PROMOTER               | 0.899                                                        | 1.673                          | 1311.96            | 2195.52            | 1.505                          | 1046.81            | 1575.00            |
| A_68_P21797527 | chr2:160698949-160698993                          | NM_177263:-244           | Zhx3          | DIVERGENT_PROMOTER     | 0.899                                                        | 0.696                          | 1569.59            | 1093.10            | 0.626                          | 1493.34            | 934.84             |
| A_68_P30353821 | chr15:77200742-77200786                           | BC100417:676             |               | INSIDE                 | 0.899                                                        | 2.384                          | 882.16             | 2102.68            | 2.143                          | 739.78             | 1585.34            |
| A_68_P31678552 | chr18:46901420-46901464                           | NM_009681:-128           | Ap3s1         | DIVERGENT_PROMOTER     | 0.898                                                        | 0.598                          | 1436.08            | 858.15             | 0.537                          | 1146.25            | 615.14             |
| A_68_P27788007 | chr11:50139083-50139127                           | NM_001110499:71          | Canx          | INSIDE                 | 0.898                                                        | 0.435                          | 2047.06            | 890.59             | 0.391                          | 1681.03            | 656.54             |
| A_68_P27921607 | chr11:74451400-74451447                           | NM_001013784:18317       | E130309D14Rik | INSIDE                 | 0.898                                                        | 0.672                          | 1060.70            | 713.04             | 0.603                          | 922.67             | 556.72             |
| A_68_P32461571 | chrX:70473910-70473954                            | NM_007978:288            | F8a           | INSIDE                 | 0.898                                                        | 2.270                          | 536.08             | 1216.71            | 2.038                          | 401.25             | 817.74             |
| A_68_P25827950 | chr8:46108981-46109030                            | NM_001081286:73444       | Fat1          | INSIDE                 | 0.898                                                        | 3.184                          | 318.98             | 1015.61            | 2.858                          | 310.74             | 888.21             |
| A_68_P25954495 | chr8:73376456-73376500                            | NM_032397:4429           | Kenn1         | INSIDE                 | 0.898                                                        | 3.380                          | 671.05             | 2268.10            | 3.037                          | 596.84             | 1812.33            |
| A_68_P24378363 | chr6:38586630-38586674                            | NM_001033171:587         | Klrg2         | INSIDE                 | 0.898                                                        | 0.651                          | 1272.65            | 828.50             | 0.585                          | 1154.95            | 675.12             |
| A_68_P32016088 | chr19:23216510-23216554                           | NR_035423:-7388          | Mir1192       | PROMOTER               | 0.898                                                        | 0.665                          | 1387.25            | 922.58             | 0.597                          | 1122.97            | 670.34             |
| A_68_P32697218 | chrX:136595877-136595921                          | NM_001081668:1209        | Nup62cl       | INSIDE                 | 0.898                                                        | 2.127                          | 554.82             | 1180.11            | 1.910                          | 396.66             | 757.56             |
| A_68_P30346601 | chr15:76010142-76010186                           | NM_201394:15976          | Plec          | INSIDE                 | 0.898                                                        | 2.830                          | 425.34             | 1203.82            | 2.541                          | 338.94             | 861.08             |
| A_68_P24008563 | chr5:115685673-115685717                          | NM_026398:-165           | Pop5          | PROMOTER               | 0.898                                                        | 1.617                          | 1220.32            | 1972.67            | 1.452                          | 1061.02            | 1540.15            |
| A_68_P28186726 | chr11:120645198-120645242                         | NM_009053:298            | Rfng          | INSIDE                 | 0.898                                                        | 0.553                          | 1266.87            | 700.90             | 0.497                          | 1152.82            | 573.05             |
| A_68_P22875662 | chr4:44181111-44181156                            | NM_175201:-723           | Rnf38         | PROMOTER               | 0.898                                                        | 2.601                          | 622.41             | 1618.74            | 2.335                          | 610.15             | 1424.68            |
| A_68_P25957633 | chr8:74108592-74108640                            | NM_011977:15791          | Sle27a1       | INSIDE                 | 0.898                                                        | 2.098                          | 924.15             | 1938.48            | 1.883                          | 694.71             | 1308.17            |
| A_68_P27629545 | chr11:19920766-19920810                           | NM_033523:96344          | Spred2        | INSIDE                 | 0.898                                                        | 2.268                          | 647.00             | 1467.11            | 2.036                          | 553.21             | 1126.51            |
| A_68_P25025683 | chr7:29946879-29946923                            | NM_182927:6766           | Spred3        | INSIDE                 | 0.898                                                        | 1.910                          | 1121.38            | 2141.97            | 1.716                          | 872.72             | 1497.47            |
| A_68_P20444768 | chr1:93698701-93698745                            | NM_007855:669            | Twist2        | INSIDE                 | 0.898                                                        | 0.723                          | 1562.40            | 1129.79            | 0.650                          | 1247.70            | 810.64             |
| A_68_P23364203 | chr4:141020484-141020528                          | NM_009541:19919          | Zbtb17        | INSIDE                 | 0.898                                                        | 1.955                          | 638.54             | 1248.27            | 1.755                          | 599.83             | 1052.72            |



| ProbeName      | Target position of probe on CpG island microarray | TargetID                 | GeneSymbol    | CpG island Description | Ratio of relative methylation (TiO <sub>2</sub> -NP/Vehicle) | Sham group                     |                    |                    | TiO <sub>2</sub> -H group      |                    |                    |
|----------------|---------------------------------------------------|--------------------------|---------------|------------------------|--------------------------------------------------------------|--------------------------------|--------------------|--------------------|--------------------------------|--------------------|--------------------|
|                |                                                   |                          |               |                        |                                                              | Relative methylation (Cy5/Cy3) | Cy3 signal (Input) | Cy5 signal (MeDIP) | Relative methylation (Cy5/Cy3) | Cy3 signal (Input) | Cy5 signal (MeDIP) |
| A_68_P21937419 | chr3:9452272-9452316                              | NM_133218:157791         | Zfp704        | INSIDE                 | 0.898                                                        | 2.019                          | 399.00             | 805.54             | 1.813                          | 393.61             | 713.51             |
| A_68_P24385305 | chr6:39822036-39822080                            |                          |               | Unknown                | 0.898                                                        | 0.620                          | 1908.35            | 1183.69            | 0.557                          | 1446.29            | 805.78             |
| A_68_P29002651 | chr13:45663653-45663697                           | NM_009124:396671         | Atxn1         | INSIDE                 | 0.897                                                        | 3.826                          | 2945.82            | 11270.84           | 3.432                          | 2389.25            | 8200.46            |
| A_68_P31103376 | chr17:25522874-25522918                           | NM_001163691:47832       | Caena1h       | INSIDE                 | 0.897                                                        | 2.191                          | 423.71             | 928.39             | 1.966                          | 354.80             | 697.60             |
| A_68_P30369297 | chr15:79762789-79762833                           | NM_144811:266            | Cbx7          | INSIDE                 | 0.897                                                        | 1.947                          | 2026.83            | 3945.98            | 1.747                          | 1624.22            | 2837.25            |
| A_68_P31792810 | chr18:67770708-67770752                           | NM_001081073:30260       | Cep76         | DOWNSTREAM             | 0.897                                                        | 0.570                          | 924.59             | 527.08             | 0.511                          | 882.98             | 451.34             |
| A_68_P22291209 | chr3:84283512-84283556                            | NM_001205355:-121        | Fhdcl         | PROMOTER               | 0.897                                                        | 0.367                          | 2113.36            | 776.24             | 0.329                          | 1625.63            | 535.36             |
| A_68_P27800934 | chr11:52578718-52578762                           | NM_177059:533            | Fstl4         | INSIDE                 | 0.897                                                        | 0.684                          | 3671.47            | 2510.26            | 0.613                          | 2769.31            | 1698.85            |
| A_68_P26156364 | chr8:111864649-111864693                          | NR_002928:138            | Gm1943        | INSIDE                 | 0.897                                                        | 3.628                          | 1239.58            | 4497.27            | 3.255                          | 893.95             | 2910.05            |
| A_68_P24428224 | chr6:48547697-48547741                            | NM_001079901:3837        | Repin1        | INSIDE                 | 0.897                                                        | 2.619                          | 338.79             | 887.28             | 2.350                          | 315.97             | 742.40             |
| A_68_P22824534 | chr4:33070413-33070457                            | NM_027491:462            | Rragd         | INSIDE                 | 0.897                                                        | 2.132                          | 656.19             | 1399.32            | 1.913                          | 696.22             | 1331.73            |
| A_68_P27807573 | chr11:53794024-53794068                           | NM_019723:-517           | Sle22a21      | PROMOTER               | 0.897                                                        | 1.627                          | 979.41             | 1593.89            | 1.459                          | 837.46             | 1222.22            |
| A_68_P24127578 | chr5:138229494-138229544                          | NM_001005426:489         | Zcwpw1        | INSIDE                 | 0.897                                                        | 6.519                          | 1167.22            | 7609.32            | 5.846                          | 817.42             | 4778.26            |
| A_68_P32536916 | chrX:91234250-91234302                            | ENSMUST00000118140:-118  |               | PROMOTER               | 0.897                                                        | 1.915                          | 843.43             | 1615.10            | 1.717                          | 406.50             | 697.91             |
| A_68_P25833740 | chr8:47085210-47085254                            | NM_001039562:-28         | Ankrd37       | PROMOTER               | 0.896                                                        | 0.573                          | 901.59             | 516.87             | 0.514                          | 718.51             | 369.15             |
| A_68_P30927365 | chr16:85080178-85080222                           | NM_001198823:93752       | App           | INSIDE                 | 0.896                                                        | 2.908                          | 843.05             | 2451.72            | 2.605                          | 703.09             | 1831.89            |
| A_68_P32782610 | chrX:157432513-157432557                          | NM_001024624:79          | Cdk15         | INSIDE                 | 0.896                                                        | 1.581                          | 3556.58            | 5624.24            | 1.416                          | 1697.33            | 2404.24            |
| A_68_P31075177 | chr17:17987055-17987099                           | NM_008215:5076           | Has1          | INSIDE                 | 0.896                                                        | 1.671                          | 2408.65            | 4025.72            | 1.498                          | 2203.82            | 3300.89            |
| A_68_P23080770 | chr4:86257737-86257781                            | NM_173400:168            | Haus6         | INSIDE                 | 0.896                                                        | 0.405                          | 1715.87            | 695.31             | 0.363                          | 1289.28            | 467.85             |
| A_68_P32029538 | chr19:25484679-25484723                           | NM_181404:173009         | Kank1         | INSIDE                 | 0.896                                                        | 4.044                          | 2173.99            | 8790.99            | 3.624                          | 1640.19            | 5943.97            |
| A_68_P32140494 | chr19:45857174-45857218                           | NM_023799:585            | Mgea5         | INSIDE                 | 0.896                                                        | 1.552                          | 1486.20            | 2306.76            | 1.390                          | 1265.56            | 1759.58            |
| A_68_P20451520 | chr1:94744954-94744998                            | NR_029559:-1978          | Mir149        | PROMOTER               | 0.896                                                        | 2.155                          | 8283.84            | 17848.09           | 1.930                          | 5640.09            | 10883.24           |
| A_68_P25949902 | chr8:72635905-72635949                            | NM_007789:8817           | Nean          | INSIDE                 | 0.896                                                        | 1.825                          | 1815.98            | 3315.00            | 1.636                          | 1587.47            | 2596.39            |
| A_68_P30456843 | chr15:95059574-95059618                           | NM_016743:299541         | Nell2         | INSIDE                 | 0.896                                                        | 2.057                          | 763.90             | 1571.61            | 1.843                          | 702.66             | 1295.33            |
| A_68_P22695187 | chr4:3865199-3865243                              | NM_019969:332            | Plag1         | INSIDE                 | 0.896                                                        | 1.656                          | 3559.54            | 5893.17            | 1.483                          | 2568.88            | 3809.52            |
| A_68_P22204193 | chr3:66025009-66025053                            | NM_008987:1222           | Ptx3          | INSIDE                 | 0.896                                                        | 2.451                          | 1646.55            | 4035.73            | 2.197                          | 1262.02            | 2772.17            |
| A_68_P24992474 | chr7:19872133-19872177                            | NM_001025364:-4293       | Rtn2          | PROMOTER               | 0.896                                                        | 2.827                          | 968.96             | 2739.17            | 2.533                          | 874.12             | 2214.03            |
| A_68_P28307255 | chr12:28026369-28026413                           | NM_009234:1193           | Sox11         | INSIDE                 | 0.896                                                        | 1.919                          | 1302.54            | 2499.73            | 1.719                          | 1124.74            | 1933.78            |
| A_68_P31381746 | chr17:80605842-80605886                           | NM_001195485:781         | Srsf7         | INSIDE                 | 0.896                                                        | 0.611                          | 1187.90            | 726.08             | 0.548                          | 1110.29            | 607.92             |
| A_68_P23353413 | chr4:139225072-139225116                          | NM_031873:15642          | Tas1r2        | INSIDE                 | 0.896                                                        | 3.467                          | 797.66             | 2765.31            | 3.105                          | 678.03             | 2105.13            |
| A_68_P27992698 | chr11:86940439-86940483                           | NM_197987:-118           | Trim37        | PROMOTER               | 0.896                                                        | 0.486                          | 1740.04            | 846.25             | 0.436                          | 1509.53            | 657.48             |
| A_68_P21622817 | chr2:128891746-128891790                          | NM_027192:86             | Ttl           | INSIDE                 | 0.896                                                        | 0.642                          | 1383.93            | 888.00             | 0.575                          | 1104.45            | 634.85             |
| A_68_P21137234 | chr2:35866956-35867000                            |                          |               | Unknown                | 0.896                                                        | 0.479                          | 1347.83            | 645.43             | 0.429                          | 1116.62            | 479.17             |
| A_68_P20641035 | chr1:137584675-137584719                          | ENSMUST00000112103:-14   |               | PROMOTER               | 0.896                                                        | 2.874                          | 408.73             | 1174.71            | 2.575                          | 359.50             | 925.58             |
| A_68_P31175219 | chr17:39982102-39982146                           | ENSMUST00000157647:-1946 |               | PROMOTER               | 0.896                                                        | 3.289                          | 218348.60          | 718222.00          | 2.948                          | 151257.30          | 445937.40          |
| A_68_P31939675 | chr19:7491423-7491467                             | NM_175381:-670           | 2700081O15Rik | PROMOTER               | 0.895                                                        | 0.652                          | 789.95             | 515.00             | 0.583                          | 720.18             | 420.01             |
| A_68_P31150730 | chr17:33980032-33980076                           | NM_019421:19             | Cd320         | INSIDE                 | 0.895                                                        | 2.172                          | 1440.50            | 3129.12            | 1.944                          | 1156.43            | 2247.57            |
| A_68_P24122090 | chr5:137042535-137042579                          | NM_198602:719            | Cux1          | INSIDE                 | 0.895                                                        | 0.515                          | 1632.00            | 839.84             | 0.461                          | 1315.10            | 605.95             |
| A_68_P21840413 | chr2:168094194-168094238                          | NM_001081134:615         | Keng1         | INSIDE                 | 0.895                                                        | 2.129                          | 1437.87            | 3061.37            | 1.905                          | 990.42             | 1886.70            |
| A_68_P29330398 | chr13:112545643-112545687                         | NM_011945:53527          | Map3k1        | INSIDE                 | 0.895                                                        | 2.390                          | 1140.16            | 2724.47            | 2.139                          | 810.08             | 1732.84            |
| A_68_P25279961 | chr7:90017553-90017603                            | NM_175366:1736           | Mex3b         | INSIDE                 | 0.895                                                        | 0.500                          | 1161.42            | 580.62             | 0.448                          | 956.32             | 428.03             |
| A_68_P24591425 | chr6:83051529-83051573                            | NM_026744:-7551          | Mrpl53        | PROMOTER               | 0.895                                                        | 0.601                          | 1376.95            | 827.31             | 0.538                          | 1073.82            | 577.68             |
| A_68_P20413388 | chr1:88567300-88567344                            | NM_010933:-174           | Npcc          | PROMOTER               | 0.895                                                        | 1.763                          | 1139.18            | 2008.72            | 1.579                          | 961.93             | 1518.56            |
| A_68_P31256421 | chr17:56613568-56613612                           | NM_011218:2313           | Ptprs         | INSIDE                 | 0.895                                                        | 0.589                          | 1960.16            | 1154.00            | 0.527                          | 1435.34            | 756.32             |
| A_68_P23359682 | chr4:140258313-140258357                          | NM_173867:947            | Rec2          | INSIDE                 | 0.895                                                        | 0.635                          | 1178.32            | 748.79             | 0.569                          | 1066.09            | 606.26             |
| A_68_P30605570 | chr16:23927739-23927783                           | NM_001008230:3120        | Rtp2          | INSIDE                 | 0.895                                                        | 2.054                          | 418.35             | 859.20             | 1.838                          | 359.45             | 660.59             |
| A_68_P21843350 | chr2:168581447-168581491                          | NM_175303:11233          | Sall4         | INSIDE                 | 0.895                                                        | 2.566                          | 1164.25            | 2987.90            | 2.297                          | 943.35             | 2166.60            |
| A_68_P29675223 | chr14:66349464-66349508                           | NM_001168318:64247       | Scara5        | INSIDE                 | 0.895                                                        | 2.822                          | 397.03             | 1120.57            | 2.527                          | 312.90             | 790.63             |
| A_68_P27814243 | chr11:55017874-55017918                           | NM_153139:55             | Sle36a1       | INSIDE                 | 0.895                                                        | 1.717                          | 1001.84            | 1720.05            | 1.537                          | 900.53             | 1384.20            |
| A_68_P32116952 | chr19:41818141-41818185                           | NM_015748:184            | Slit1         | INSIDE                 | 0.895                                                        | 1.783                          | 783.34             | 1396.69            | 1.596                          | 638.32             | 1018.56            |
| A_68_P31201715 | chr17:45684089-45684133                           | NM_0010113749:2516       | Tmem151b      | INSIDE                 | 0.895                                                        | 3.892                          | 1793.01            | 6978.43            | 3.482                          | 1251.09            | 4356.57            |

| ProbeName      | Target position of probe on CpG island microarray | TargetID                 | GeneSymbol    | CpG island Description | Ratio of relative methylation (TiO <sub>2</sub> -NP/Vehicle) | Sham group                                             |                               |                               | TiO <sub>2</sub> -H group                              |                               |                               |
|----------------|---------------------------------------------------|--------------------------|---------------|------------------------|--------------------------------------------------------------|--------------------------------------------------------|-------------------------------|-------------------------------|--------------------------------------------------------|-------------------------------|-------------------------------|
|                |                                                   |                          |               |                        |                                                              | Relative methylation (C <sub>5</sub> /C <sub>3</sub> ) | C <sub>3</sub> signal (Input) | C <sub>5</sub> signal (MeDIP) | Relative methylation (C <sub>5</sub> /C <sub>3</sub> ) | C <sub>3</sub> signal (Input) | C <sub>5</sub> signal (MeDIP) |
| A_68_P22059534 | chr3:36588360-36588404                            | NM_019510:707            | Trpc3         | INSIDE                 | 0.895                                                        | 0.586                                                  | 934.55                        | 547.83                        | 0.525                                                  | 732.05                        | 384.19                        |
| A_68_P23185611 | chr4:106311721-106311765                          | NM_177667:16689          | Tie22         | INSIDE                 | 0.895                                                        | 3.008                                                  | 642.71                        | 1932.98                       | 2.691                                                  | 546.04                        | 1469.33                       |
| A_68_P26082676 | chr8:97851882-97851927                            | NM_024467:3946           | Zfp319        | INSIDE                 | 0.895                                                        | 2.044                                                  | 367.33                        | 750.93                        | 1.831                                                  | 361.52                        | 661.78                        |
| A_68_P25008270 | chr7:25866801-25866845                            | NM_175477:4558           | Zfp574        | INSIDE                 | 0.895                                                        | 1.741                                                  | 883.35                        | 1537.77                       | 1.558                                                  | 738.85                        | 1151.44                       |
| A_68_P24768311 | chr6:114919698-114919742                          | ENSMUST00000164670:-499  |               | PROMOTER               | 0.895                                                        | 0.629                                                  | 923.01                        | 580.32                        | 0.563                                                  | 727.46                        | 409.57                        |
| A_68_P23278549 | chr4:125840190-125840234                          | NM_025856:-303           | 1700029G01Rik | PROMOTER               | 0.894                                                        | 1.674                                                  | 4006.90                       | 6707.24                       | 1.496                                                  | 3264.99                       | 4884.42                       |
| A_68_P23327317 | chr4:134774491-134774538                          | NM_013885:54161          | Clic4         | INSIDE                 | 0.894                                                        | 3.881                                                  | 1064.28                       | 4130.46                       | 3.471                                                  | 779.07                        | 2703.87                       |
| A_68_P21905702 | chr2:180445146-180445190                          | NM_177852:-464           | Dido1         | DIVERGENT_PROMOTER     | 0.894                                                        | 2.009                                                  | 1084.89                       | 2179.82                       | 1.795                                                  | 1063.16                       | 1908.88                       |
| A_68_P29047198 | chr13:54151095-54151139                           | NM_010076:-89            | Drd1a         | PROMOTER               | 0.894                                                        | 0.651                                                  | 1388.26                       | 903.94                        | 0.582                                                  | 1169.17                       | 680.59                        |
| A_68_P26658153 | chr9:77955869-77955913                            | NM_023605:573            | Fbxo9         | INSIDE                 | 0.894                                                        | 0.691                                                  | 2457.81                       | 1697.89                       | 0.617                                                  | 1843.60                       | 1138.00                       |
| A_68_P23804519 | chr5:75016038-75016082                            | NM_001159578:57837       | Lnx1          | INSIDE                 | 0.894                                                        | 1.830                                                  | 652.45                        | 1194.16                       | 1.637                                                  | 495.91                        | 811.86                        |
| A_68_P27782124 | chr11:49064057-49064101                           | NM_001110150:25          | Mgat1         | INSIDE                 | 0.894                                                        | 0.674                                                  | 1668.03                       | 1123.92                       | 0.602                                                  | 1420.33                       | 855.57                        |
| A_68_P21722730 | chr2:147009969-147010013                          | NR_030769:172            | Nkx2-2as      | INSIDE                 | 0.894                                                        | 0.645                                                  | 1106.53                       | 713.17                        | 0.576                                                  | 884.23                        | 509.32                        |
| A_68_P26017400 | chr8:86496806-86496851                            | NM_008854:-48            | Prkaca        | PROMOTER               | 0.894                                                        | 0.603                                                  | 2236.05                       | 1347.68                       | 0.539                                                  | 1833.58                       | 987.45                        |
| A_68_P29715884 | chr14:73542895-73542939                           | NR_033185:325            | Rcbtb2        | INSIDE                 | 0.894                                                        | 1.878                                                  | 520.24                        | 977.24                        | 1.680                                                  | 437.04                        | 734.18                        |
| A_68_P28081368 | chr11:102635887-102635931                         | NM_001110778:13156       | Adam11        | INSIDE                 | 0.893                                                        | 0.551                                                  | 1013.64                       | 558.08                        | 0.492                                                  | 808.55                        | 397.64                        |
| A_68_P21781773 | chr2:158054637-158054681                          | NM_001131021:300         | D630003M21Rik | INSIDE                 | 0.893                                                        | 2.303                                                  | 368.89                        | 849.66                        | 2.057                                                  | 315.97                        | 649.85                        |
| A_68_P26345299 | chr9:20878051-20878095                            | NM_001039824:-114        | Fdx11         | PROMOTER               | 0.893                                                        | 0.671                                                  | 1223.88                       | 821.37                        | 0.599                                                  | 1042.72                       | 624.58                        |
| A_68_P30363893 | chr15:78858397-78858441                           | NM_008197:-223           | H1f0          | PROMOTER               | 0.893                                                        | 1.973                                                  | 784.65                        | 1548.01                       | 1.762                                                  | 719.15                        | 1267.09                       |
| A_68_P25466057 | chr7:127039834-127039878                          | NM_029610:51             | Lymr1         | PROMOTER               | 0.893                                                        | 0.530                                                  | 2019.19                       | 1070.06                       | 0.473                                                  | 1766.05                       | 835.71                        |
| A_68_P30232956 | chr15:55389148-55389192                           | NM_001168250:208         | Mtbp          | INSIDE                 | 0.893                                                        | 0.587                                                  | 1426.30                       | 836.89                        | 0.524                                                  | 1210.81                       | 634.41                        |
| A_68_P31958229 | chr19:11943317-11943361                           | NM_001011775:2366        | Olfir1419     | DOWNSTREAM             | 0.893                                                        | 2.282                                                  | 713.00                        | 1627.28                       | 2.038                                                  | 571.50                        | 1164.93                       |
| A_68_P31632687 | chr18:38369690-38369734                           | NM_029357:-296           | Pcdh1         | PROMOTER               | 0.893                                                        | 0.561                                                  | 1628.03                       | 912.99                        | 0.501                                                  | 1460.88                       | 731.77                        |
| A_68_P24269923 | chr6:17790613-17790657                            | NM_001083315:91419       | St7           | PROMOTER               | 0.893                                                        | 2.905                                                  | 481.50                        | 1398.61                       | 2.594                                                  | 490.75                        | 1272.89                       |
| A_68_P27288943 | chr10:80795596-80795640                           | NM_009325:4143           | Tbxa2r        | INSIDE                 | 0.893                                                        | 2.235                                                  | 2492.34                       | 5570.41                       | 1.996                                                  | 1690.73                       | 3374.13                       |
| A_68_P20346777 | chr1:74145308-74145352                            | NM_027884:25691          | Tns1          | INSIDE                 | 0.893                                                        | 1.733                                                  | 1088.13                       | 1885.75                       | 1.548                                                  | 960.92                        | 1487.36                       |
| A_68_P30094310 | chr15:27677668-27677712                           | NM_001081302:277913      | Trio          | INSIDE                 | 0.893                                                        | 2.331                                                  | 1235.93                       | 2881.51                       | 2.083                                                  | 969.16                        | 2018.62                       |
| A_68_P21875502 | chr2:174282709-174282753                          | NM_001080971:6535        | Tubb1         | INSIDE                 | 0.893                                                        | 2.013                                                  | 1148.52                       | 2312.36                       | 1.798                                                  | 876.83                        | 1576.79                       |
| A_68_P29052330 | chr13:55050305-55050349                           | NM_153131:-466           | Unc5a         | PROMOTER               | 0.893                                                        | 2.652                                                  | 390.21                        | 1034.86                       | 2.368                                                  | 388.66                        | 920.17                        |
| A_68_P26422483 | chr9:35229495-35229539                            | ENSMUST00000154652:-1656 |               | PROMOTER               | 0.893                                                        | 0.616                                                  | 930.36                        | 573.49                        | 0.550                                                  | 854.23                        | 470.02                        |
| A_68_P27933405 | chr11:76486147-76486191                           | NM_177182:197            | Bhlha9        | INSIDE                 | 0.892                                                        | 1.588                                                  | 1183.80                       | 1879.78                       | 1.416                                                  | 1013.72                       | 1435.16                       |
| A_68_P26132607 | chr8:107792187-107792231                          | NM_015821:3661           | Fbxl8         | INSIDE                 | 0.892                                                        | 0.590                                                  | 1532.96                       | 904.80                        | 0.527                                                  | 1271.91                       | 669.90                        |
| A_68_P23417739 | chr4:151660365-151660409                          | NM_008237:5385           | Hes3          | INSIDE                 | 0.892                                                        | 2.008                                                  | 4636.67                       | 9310.22                       | 1.792                                                  | 3243.52                       | 5812.43                       |
| A_68_P28748413 | chr12:113416336-113416380                         | NM_001097621:31940       | Kif26a        | INSIDE                 | 0.892                                                        | 2.558                                                  | 1489.18                       | 3809.76                       | 2.282                                                  | 1364.44                       | 3113.55                       |
| A_68_P29681980 | chr14:67529185-67529229                           | NM_175498:-838           | Pnma2         | PROMOTER               | 0.892                                                        | 0.705                                                  | 1313.08                       | 926.03                        | 0.629                                                  | 1081.10                       | 680.19                        |
| A_68_P23326918 | chr4:134708841-134708885                          | NM_019732:32303          | Rumx3         | INSIDE                 | 0.892                                                        | 0.590                                                  | 2478.02                       | 1462.88                       | 0.527                                                  | 2063.71                       | 1087.31                       |
| A_68_P24354189 | chr6:34126897-34126941                            | NM_021435:136            | Slc35b4       | INSIDE                 | 0.892                                                        | 0.665                                                  | 1656.19                       | 1102.03                       | 0.594                                                  | 1227.73                       | 728.85                        |
| A_68_P26504313 | chr9:50369450-50369494                            | NM_025687:-99            | Tex12         | DIVERGENT_PROMOTER     | 0.892                                                        | 2.725                                                  | 463.21                        | 1262.40                       | 2.430                                                  | 446.03                        | 1083.89                       |
| A_68_P21765248 | chr2:155207645-155207689                          | NM_178111:75             | Trp53inp2     | INSIDE                 | 0.892                                                        | 2.304                                                  | 401.92                        | 926.02                        | 2.055                                                  | 410.90                        | 844.41                        |
| A_68_P27756066 | chr11:44283825-44283869                           | NM_024475:204            | Ublcp1        | INSIDE                 | 0.892                                                        | 0.520                                                  | 1475.52                       | 767.30                        | 0.464                                                  | 1167.52                       | 541.77                        |
| A_68_P27756065 | chr11:44283688-44283732                           | NM_024475:340            | Ublcp1        | INSIDE                 | 0.892                                                        | 0.641                                                  | 1138.10                       | 729.61                        | 0.572                                                  | 978.87                        | 560.05                        |
| A_68_P31841470 | chr18:76305467-76305511                           | NM_145356:325657         | Zbtb7c        | INSIDE                 | 0.892                                                        | 1.724                                                  | 2962.34                       | 5106.33                       | 1.538                                                  | 2348.04                       | 3610.50                       |
| A_68_P27282338 | chr10:79768997-79769041                           | NM_011789:4454           | Ape2          | INSIDE                 | 0.891                                                        | 1.718                                                  | 939.99                        | 1615.24                       | 1.531                                                  | 807.03                        | 1235.49                       |
| A_68_P24761303 | chr6:113698666-113698710                          | NM_001036684:142682      | Atp2b2        | INSIDE                 | 0.891                                                        | 2.564                                                  | 3246.56                       | 8323.77                       | 2.285                                                  | 2163.76                       | 4943.27                       |
| A_68_P29002652 | chr13:45663747-45663791                           | NM_009124:396577         | Atxn1         | INSIDE                 | 0.891                                                        | 3.810                                                  | 2675.42                       | 10194.42                      | 3.395                                                  | 1946.25                       | 6607.47                       |
| A_68_P30404228 | chr15:85809105-85809153                           | NM_009886:55079          | Celsr1        | INSIDE                 | 0.891                                                        | 3.412                                                  | 780.39                        | 2662.54                       | 3.039                                                  | 619.98                        | 1884.14                       |
| A_68_P21706949 | chr2:144219429-144219473                          | NM_181417:24680          | Csrp2bp       | INSIDE                 | 0.891                                                        | 3.298                                                  | 2238.78                       | 7383.22                       | 2.939                                                  | 1705.62                       | 5012.16                       |
| A_68_P23284104 | chr4:126892104-126892148                          | NM_198618:45612          | Dlgap3        | INSIDE                 | 0.891                                                        | 1.552                                                  | 1494.79                       | 2319.61                       | 1.383                                                  | 1290.25                       | 1784.79                       |
| A_68_P20941836 | chr1:193960762-193960806                          | NR_033536:5              | Gm10516       | INSIDE                 | 0.891                                                        | 2.676                                                  | 2122.15                       | 5679.21                       | 2.383                                                  | 1429.62                       | 3407.41                       |
| A_68_P28067856 | chr11:100259165-100259209                         | NM_010593:-82            | Jup           | PROMOTER               | 0.891                                                        | 0.696                                                  | 1379.78                       | 960.29                        | 0.620                                                  | 1164.11                       | 721.74                        |
| A_68_P25285284 | chr7:91030916-91030960                            | NM_030705:1913           | Mesdc1        | INSIDE                 | 0.891                                                        | 2.069                                                  | 982.31                        | 2032.07                       | 1.844                                                  | 883.45                        | 1628.94                       |

| ProbeName      | Target position of probe on CpG island microarray | TargetID              | GeneSymbol    | CpG island Description | Ratio of relative methylation (TiO <sub>2</sub> -NP/Vehicle) | Sham group                     |                    |                    | TiO <sub>2</sub> -H group      |                    |                    |
|----------------|---------------------------------------------------|-----------------------|---------------|------------------------|--------------------------------------------------------------|--------------------------------|--------------------|--------------------|--------------------------------|--------------------|--------------------|
|                |                                                   |                       |               |                        |                                                              | Relative methylation (Cy5/Cy3) | Cy3 signal (Input) | Cy5 signal (MeDIP) | Relative methylation (Cy5/Cy3) | Cy3 signal (Input) | Cy5 signal (MeDIP) |
| A_68_P31897793 | chr18:86564837-86564881                           | NM_144946:515         | Neto1         | INSIDE                 | 0.891                                                        | 0.590                          | 2052.63            | 1211.32            | 0.526                          | 1606.27            | 844.86             |
| A_68_P27614517 | chr11:17059599-17059643                           | NM_024459:320         | Ppp3r1        | INSIDE                 | 0.891                                                        | 3.572                          | 2969.67            | 10608.45           | 3.184                          | 2643.72            | 8417.17            |
| A_68_P23294937 | chr4:128782610-128782654                          | NM_025452:-141        | Tmem54        | PROMOTER               | 0.891                                                        | 1.716                          | 4090.85            | 7021.22            | 1.529                          | 3080.52            | 4709.00            |
| A_68_P30401942 | chr15:85465263-85465307                           |                       |               | Unknown                | 0.891                                                        | 0.643                          | 1105.37            | 710.49             | 0.573                          | 982.58             | 562.67             |
| A_68_P30380760 | chr15:81810911-81810955                           | NM_025503:-37         | 1700029P11Rik | PROMOTER               | 0.890                                                        | 4.691                          | 4260.78            | 19987.46           | 4.175                          | 2898.60            | 12100.68           |
| A_68_P24735712 | chr6:108733427-108733471                          | NM_026011:396         | Arl8b         | INSIDE                 | 0.890                                                        | 1.975                          | 2932.06            | 5790.35            | 1.757                          | 2230.39            | 3919.63            |
| A_68_P25591879 | chr7:149136030-149136074                          | NM_001009929:62       | Brsk2         | INSIDE                 | 0.890                                                        | 0.464                          | 1594.94            | 740.83             | 0.414                          | 1472.64            | 609.10             |
| A_68_P31113353 | chr17:27083739-27083783                           | NM_026948:-7337       | Cuta          | PROMOTER               | 0.890                                                        | 0.583                          | 1954.15            | 1140.09            | 0.519                          | 1695.82            | 880.82             |
| A_68_P32351250 | chrX:42142934-42142979                            | NM_001190718:382      | Deaf12l1      | INSIDE                 | 0.890                                                        | 2.434                          | 1406.27            | 3422.22            | 2.166                          | 740.86             | 1605.04            |
| A_68_P20351507 | chr1:74997610-74997654                            | NM_010544:593         | lh1           | INSIDE                 | 0.890                                                        | 0.665                          | 1540.56            | 1024.81            | 0.592                          | 1185.68            | 701.65             |
| A_68_P30456841 | chr15:95059370-95059414                           | NM_016743:299745      | Nell2         | INSIDE                 | 0.890                                                        | 2.339                          | 404.52             | 946.26             | 2.083                          | 371.13             | 773.09             |
| A_68_P24020331 | chr5:117838565-117838609                          | NM_028128:446         | Rfc5          | INSIDE                 | 0.890                                                        | 1.669                          | 876.74             | 1463.34            | 1.485                          | 767.04             | 1139.27            |
| A_68_P27924771 | chr11:75007879-75007923                           | NM_177708:406         | Rtn4rl1       | INSIDE                 | 0.890                                                        | 0.352                          | 2486.62            | 874.84             | 0.313                          | 2041.80            | 639.69             |
| A_68_P26828802 | chr9:111213792-111213836                          | NM_001164659:-428     | Trank1        | PROMOTER               | 0.890                                                        | 1.666                          | 1935.66            | 3225.03            | 1.483                          | 1523.41            | 2259.64            |
| A_68_P26153108 | chr8:111316106-111316150                          | NM_007496:77585       | Zfxh3         | INSIDE                 | 0.890                                                        | 1.954                          | 1169.80            | 2285.54            | 1.739                          | 897.51             | 1560.72            |
| A_68_P32288521 | chrX:20002973-20003017                            | ENSMUST00000136093:81 |               | INSIDE                 | 0.890                                                        | 2.401                          | 1636.55            | 3928.69            | 2.137                          | 885.10             | 1891.18            |
| A_68_P22789805 | chr4:25208818-25208862                            | NM_026194:128         | 1810074P20Rik | INSIDE                 | 0.889                                                        | 0.493                          | 1201.30            | 592.31             | 0.439                          | 1106.56            | 485.27             |
| A_68_P28574819 | chr12:81360793-81360837                           | NM_134156:544         | Actn1         | INSIDE                 | 0.889                                                        | 2.440                          | 802.41             | 1957.68            | 2.169                          | 843.03             | 1828.88            |
| A_68_P28853793 | chr13:17897267-17897311                           | NM_001081058:-357     | Cdk13         | PROMOTER               | 0.889                                                        | 0.605                          | 1140.77            | 689.66             | 0.537                          | 969.01             | 520.64             |
| A_68_P20613763 | chr1:133026416-133026460                          | NM_145508:8373        | Dyrk3         | INSIDE                 | 0.889                                                        | 3.548                          | 1432.28            | 5081.17            | 3.153                          | 1217.69            | 3839.20            |
| A_68_P26156365 | chr8:111864724-111864768                          | NR_002928:62          | Gm1943        | INSIDE                 | 0.889                                                        | 3.269                          | 1637.77            | 5353.48            | 2.905                          | 1259.29            | 3657.66            |
| A_68_P30404769 | chr15:85889475-85889519                           | NM_001205353:340      | Gramd4        | INSIDE                 | 0.889                                                        | 3.116                          | 2346.73            | 7313.48            | 2.771                          | 1889.15            | 5235.64            |
| A_68_P30366725 | chr15:79315828-79315872                           | NM_008427:19821       | Kenj4         | INSIDE                 | 0.889                                                        | 2.299                          | 344.63             | 792.26             | 2.044                          | 276.13             | 564.42             |
| A_68_P23439339 | chr4:154938015-154938059                          | NM_001159637:113      | Nadk          | INSIDE                 | 0.889                                                        | 1.566                          | 1469.01            | 2300.80            | 1.393                          | 1343.84            | 1871.65            |
| A_68_P23435281 | chr4:154338676-154338720                          | NM_172990:457         | Pank4         | INSIDE                 | 0.889                                                        | 0.589                          | 1099.66            | 648.16             | 0.524                          | 846.94             | 444.04             |
| A_68_P24126059 | chr5:137943930-137943974                          | NM_028753:-295        | Pop7          | PROMOTER               | 0.889                                                        | 0.698                          | 1459.67            | 1019.42            | 0.621                          | 1105.83            | 686.23             |
| A_68_P20172917 | chr1:40738757-40738801                            | NM_001033289:222      | Ste9a2        | INSIDE                 | 0.889                                                        | 2.232                          | 17246.89           | 38489.60           | 1.983                          | 13377.93           | 26533.75           |
| A_68_P21568535 | chr2:119063252-119063296                          | NM_016907:179         | Spint1        | INSIDE                 | 0.889                                                        | 0.632                          | 837.28             | 529.12             | 0.562                          | 642.68             | 361.04             |
| A_68_P26529575 | chr9:54997611-54997655                            | NM_180600:457         | Ube2q2        | INSIDE                 | 0.889                                                        | 2.040                          | 504.80             | 1029.68            | 1.813                          | 467.03             | 846.80             |
| A_68_P30401621 | chr15:85411484-85411528                           | NM_001163633:-347     | Wnt7b         | PROMOTER               | 0.889                                                        | 1.822                          | 549.87             | 1001.87            | 1.619                          | 632.13             | 1023.39            |
| A_68_P26549614 | chr9:58589155-58589200                            | NM_028598:189         | 2410076I21Rik | INSIDE                 | 0.888                                                        | 2.457                          | 728.87             | 1791.15            | 2.181                          | 717.38             | 1564.61            |
| A_68_P31630976 | chr18:38095246-38095290                           | NM_007858:-203        | Diap1         | PROMOTER               | 0.888                                                        | 0.580                          | 1141.50            | 662.41             | 0.515                          | 988.59             | 509.44             |
| A_68_P28036751 | chr11:94979621-94979665                           | NM_010055:-1788       | Dlx3          | PROMOTER               | 0.888                                                        | 2.004                          | 725.68             | 1454.37            | 1.779                          | 642.02             | 1142.29            |
| A_68_P31156414 | chr17:35042317-35042361                           | NM_145830:6420        | Elmt2         | INSIDE                 | 0.888                                                        | 4.497                          | 1428.50            | 6424.10            | 3.994                          | 1083.27            | 4326.21            |
| A_68_P26350220 | chr9:21855814-21855858                            | NM_010487:631         | Elavl3        | INSIDE                 | 0.888                                                        | 0.451                          | 1257.45            | 567.25             | 0.400                          | 1010.05            | 404.47             |
| A_68_P25958570 | chr8:74249375-74249419                            | NM_028715:184         | Fcho1         | INSIDE                 | 0.888                                                        | 0.614                          | 3441.64            | 2111.50            | 0.545                          | 2579.42            | 1404.99            |
| A_68_P30547079 | chr16:11253448-11253492                           | NM_001130008:948      | Gspt1         | INSIDE                 | 0.888                                                        | 2.249                          | 1059.18            | 2382.58            | 1.998                          | 942.43             | 1883.18            |
| A_68_P30347940 | chr15:76210921-76210965                           | NM_001162489:-9518    | Heat7a        | PROMOTER               | 0.888                                                        | 0.604                          | 1978.08            | 1194.86            | 0.536                          | 1697.95            | 910.92             |
| A_68_P28431905 | chr12:52930950-52930994                           | NM_144788:-449        | Hectd1        | PROMOTER               | 0.888                                                        | 2.789                          | 638.70             | 1781.57            | 2.477                          | 583.04             | 1444.26            |
| A_68_P31259626 | chr17:57161992-57162036                           | NM_010613:8916        | Khsrp         | INSIDE                 | 0.888                                                        | 1.776                          | 843.68             | 1498.78            | 1.578                          | 715.60             | 1129.16            |
| A_68_P30347566 | chr15:76158037-76158081                           | NR_028283:-95         | LOC100302626  | PROMOTER               | 0.888                                                        | 0.623                          | 2017.93            | 1256.67            | 0.553                          | 1538.90            | 850.92             |
| A_68_P32143075 | chr19:46380056-46380100                           | NM_019408:-106        | Nfkb2         | PROMOTER               | 0.888                                                        | 0.545                          | 1261.39            | 687.85             | 0.484                          | 1086.06            | 525.93             |
| A_68_P30371156 | chr15:80094548-80094592                           | NM_175109:166         | Rps19bp1      | INSIDE                 | 0.888                                                        | 0.494                          | 2262.20            | 1117.65            | 0.439                          | 1985.43            | 870.72             |
| A_68_P23794551 | chr5:73305609-73305653                            | NM_001113423:75       | Slain2        | INSIDE                 | 0.888                                                        | 0.495                          | 1486.99            | 735.78             | 0.439                          | 1346.56            | 591.65             |
| A_68_P24118205 | chr5:136333004-136333048                          | NM_021403:39051       | Srrm3         | INSIDE                 | 0.888                                                        | 2.079                          | 4327.95            | 8996.79            | 1.845                          | 3515.61            | 6487.98            |
| A_68_P27325553 | chr10:87922455-87922499                           | NM_011517:145         | Sypc3         | INSIDE                 | 0.888                                                        | 3.006                          | 771.95             | 2320.57            | 2.670                          | 653.58             | 1744.77            |
| A_68_P26736546 | chr9:94438103-94438147                            | NM_001033145:376      | 1190002N15Rik | INSIDE                 | 0.887                                                        | 1.945                          | 419.62             | 816.24             | 1.726                          | 405.19             | 699.31             |
| A_68_P25591876 | chr7:149135444-149135488                          | NM_029426:-189        | Brsk2         | PROMOTER               | 0.887                                                        | 0.716                          | 2210.20            | 1583.34            | 0.636                          | 1747.49            | 1110.87            |
| A_68_P24990419 | chr7:19495688-19495732                            | NM_001033314:43       | Ccdc61        | INSIDE                 | 0.887                                                        | 0.481                          | 1236.84            | 594.90             | 0.427                          | 1035.96            | 442.11             |
| A_68_P22716232 | chr4:8679096-8679140                              | NM_001081417:61051    | Chd7          | INSIDE                 | 0.887                                                        | 1.567                          | 2761.49            | 4327.97            | 1.390                          | 2036.95            | 2832.29            |
| A_68_P33015613 | chr1_random:49705-49759                           | NM_026866:135606      | Disp1         | INSIDE                 | 0.887                                                        | 2.701                          | 799.45             | 2159.29            | 2.396                          | 656.93             | 1574.22            |

| ProbeName      | Target position of probe on CpG island microarray | TargetID               | GeneSymbol    | CpG island Description | Ratio of relative methylation (TiO <sub>2</sub> -NP/Vehicle) | Sham group                     |                    |                    | TiO <sub>2</sub> -H group      |                    |                    |
|----------------|---------------------------------------------------|------------------------|---------------|------------------------|--------------------------------------------------------------|--------------------------------|--------------------|--------------------|--------------------------------|--------------------|--------------------|
|                |                                                   |                        |               |                        |                                                              | Relative methylation (Cy5/Cy3) | Cy3 signal (Input) | Cy5 signal (MeDIP) | Relative methylation (Cy5/Cy3) | Cy3 signal (Input) | Cy5 signal (MeDIP) |
| A_68_P28988894 | chr13:43295868-43295912                           | NM_001033399:103651    | Gfod1         | INSIDE                 | 0.887                                                        | 1.982                          | 525.10             | 1040.66            | 1.758                          | 510.51             | 897.42             |
| A_68_P27470614 | chr10:115024633-115024677                         | NM_010195:182          | Lgr5          | INSIDE                 | 0.887                                                        | 0.578                          | 1660.17            | 960.29             | 0.513                          | 1335.74            | 685.04             |
| A_68_P24950637 | chr7:4764223-4764267                              | NM_133777:-302         | Ube2s         | PROMOTER               | 0.887                                                        | 0.650                          | 3030.13            | 1970.06            | 0.576                          | 2277.73            | 1313.08            |
| A_68_P25261545 | chr7:86660396-86660440                            | ENSMUST00000150985:301 |               | INSIDE                 | 0.887                                                        | 1.610                          | 1105.60            | 1780.46            | 1.428                          | 1076.53            | 1537.40            |
| A_68_P27937764 | chr11:77285096-77285140                           | NM_172945:18062        | Ankrd13b      | INSIDE                 | 0.886                                                        | 2.252                          | 1376.19            | 3098.78            | 1.996                          | 988.62             | 1972.84            |
| A_68_P23299544 | chr4:129665518-129665562                          | NM_001199696:3219      | Bai2          | INSIDE                 | 0.886                                                        | 0.625                          | 2777.98            | 1735.37            | 0.554                          | 2143.22            | 1186.57            |
| A_68_P21067987 | chr2:24617651-24617695                            | NM_001042528:895       | Caena1b       | INSIDE                 | 0.886                                                        | 0.644                          | 1720.71            | 1107.91            | 0.571                          | 1421.25            | 811.02             |
| A_68_P28155404 | chr11:115665077-115665121                         | NM_080643:9808         | Caskin2       | INSIDE                 | 0.886                                                        | 2.163                          | 2130.26            | 4607.16            | 1.917                          | 1532.01            | 2936.73            |
| A_68_P29625864 | chr14:57676795-57676839                           | NM_016975:-34          | Gja3          | PROMOTER               | 0.886                                                        | 1.641                          | 940.77             | 1543.68            | 1.454                          | 891.00             | 1295.38            |
| A_68_P20058116 | chr1:17081618-17081662                            | NM_020604:6330         | Jph1          | INSIDE                 | 0.886                                                        | 3.210                          | 702.48             | 2254.85            | 2.843                          | 720.91             | 2049.42            |
| A_68_P21698986 | chr2:142727237-142727281                          | NM_001081133:-58       | Kif16b        | PROMOTER               | 0.886                                                        | 1.644                          | 1231.82            | 2025.60            | 1.458                          | 1125.94            | 1641.14            |
| A_68_P25016757 | chr7:28119959-28120009                            | NM_001113549:-1317     | Ltbp4         | PROMOTER               | 0.886                                                        | 2.199                          | 293.92             | 646.48             | 1.950                          | 287.26             | 560.09             |
| A_68_P28445669 | chr12:55168877-55168921                           | NM_013780:819235       | Npas3         | INSIDE                 | 0.886                                                        | 0.696                          | 1409.32            | 981.05             | 0.617                          | 1159.64            | 715.51             |
| A_68_P30346612 | chr15:76011489-76011533                           | NM_201394:14630        | Plec          | INSIDE                 | 0.886                                                        | 2.690                          | 867.67             | 2333.74            | 2.382                          | 770.66             | 1835.71            |
| A_68_P23194206 | chr4:107694030-107694074                          | NM_172874:10643        | Podn          | INSIDE                 | 0.886                                                        | 3.121                          | 1472.77            | 4597.03            | 2.767                          | 1025.11            | 2836.50            |
| A_68_P23982395 | chr5:111308888-111308932                          | NM_024477:89           | Tie28         | INSIDE                 | 0.886                                                        | 4.985                          | 179.99             | 897.17             | 4.414                          | 203.68             | 899.08             |
| A_68_P25614229 | chr8:3496319-3496363                              | NM_080461:3203         | Zfp358        | INSIDE                 | 0.886                                                        | 2.017                          | 1133.62            | 2286.22            | 1.786                          | 965.21             | 1723.89            |
| A_68_P27830383 | chr11:58136875-58136919                           | NM_178761:-48          | Zfp672        | DIVERGENT_PROMOTER     | 0.886                                                        | 0.404                          | 1305.86            | 527.96             | 0.358                          | 1079.79            | 386.65             |
| A_68_P30402119 | chr15:85491531-85491575                           | AK083890:-4159         |               | PROMOTER               | 0.886                                                        | 2.426                          | 472.99             | 1147.30            | 2.149                          | 375.78             | 807.66             |
| A_68_P31374374 | chr17:79315892-79315936                           | NM_001177402:76        | 1110001A16Rik | INSIDE                 | 0.885                                                        | 1.757                          | 2935.54            | 5157.45            | 1.556                          | 2191.49            | 3409.07            |
| A_68_P26760984 | chr9:98765311-98765355                            | NM_028033:147          | 2410012M07Rik | INSIDE                 | 0.885                                                        | 2.311                          | 9977.79            | 23062.86           | 2.047                          | 7501.02            | 15352.54           |
| A_68_P32053390 | chr19:29597209-29597253                           | NM_001081319:459       | C030046E11Rik | INSIDE                 | 0.885                                                        | 0.649                          | 2249.76            | 1459.61            | 0.574                          | 1757.46            | 1009.35            |
| A_68_P27750784 | chr11:43304478-43304526                           | NM_026979:16695        | C1qtmf2       | INSIDE                 | 0.885                                                        | 2.216                          | 685.37             | 1518.99            | 1.961                          | 547.19             | 1072.89            |
| A_68_P32982271 | chr5:134998519-134998564                          | NM_001039162:29763     | Clip2         | INSIDE                 | 0.885                                                        | 2.051                          | 545.95             | 1119.78            | 1.816                          | 392.01             | 711.91             |
| A_68_P25090601 | chr7:52262939-52262983                            | NM_001008422:8659      | Scafl1        | INSIDE                 | 0.885                                                        | 2.254                          | 2312.44            | 5212.22            | 1.994                          | 1685.86            | 3361.29            |
| A_68_P28730244 | chr12:110074293-110074337                         | NM_181328:-228         | Sle25a29      | DIVERGENT_PROMOTER     | 0.885                                                        | 0.477                          | 1790.65            | 854.77             | 0.423                          | 1281.74            | 541.57             |
| A_68_P25807722 | chr8:41947794-41947838                            | NM_001044740:70        | Sle7a2        | INSIDE                 | 0.885                                                        | 2.787                          | 5287.51            | 14737.81           | 2.466                          | 4103.96            | 10120.58           |
| A_68_P24604965 | chr6:85382281-85382325                            | NM_144918:333          | Smyd5         | INSIDE                 | 0.885                                                        | 1.685                          | 1943.30            | 3274.36            | 1.492                          | 1482.54            | 2211.25            |
| A_68_P25183828 | chr7:72789560-72789604                            | NM_172310:-201         | Tarsl2        | PROMOTER               | 0.885                                                        | 2.050                          | 11629.38           | 23838.43           | 1.814                          | 8013.07            | 14539.39           |
| A_68_P31092360 | chr17:23694657-23694701                           | NM_001033496:6515      | Zfp213        | INSIDE                 | 0.885                                                        | 1.838                          | 1238.42            | 2275.95            | 1.627                          | 962.24             | 1565.67            |
| A_68_P28048036 | chr11:96858742-96858786                           |                        |               | Unknown                | 0.885                                                        | 3.501                          | 1930.90            | 6760.89            | 3.099                          | 1182.97            | 3666.53            |
| A_68_P20738463 | chr1:157405630-157405674                          | NM_026683:403          | Acbd6         | INSIDE                 | 0.884                                                        | 0.580                          | 1438.63            | 833.74             | 0.512                          | 1286.86            | 659.21             |
| A_68_P31383665 | chr17:80942894-80942947                           | NM_001033443:20254     | Cdkl4         | INSIDE                 | 0.884                                                        | 1.995                          | 466.18             | 930.16             | 1.764                          | 403.77             | 712.27             |
| A_68_P23332455 | chr4:135728739-135728783                          | NM_177733:452          | E2f2          | INSIDE                 | 0.884                                                        | 1.985                          | 826.98             | 1641.55            | 1.754                          | 909.17             | 1594.89            |
| A_68_P29604237 | chr14:52626582-52626626                           | NM_001033805:-9935     | G630016D24Rik | PROMOTER               | 0.884                                                        | 2.243                          | 517.83             | 1161.49            | 1.983                          | 448.36             | 889.14             |
| A_68_P24518613 | chr6:66846160-66846204                            | NM_001177556:-208      | Gngl2         | PROMOTER               | 0.884                                                        | 1.634                          | 2320.89            | 3791.60            | 1.444                          | 1765.80            | 2550.04            |
| A_68_P29059423 | chr13:56236168-56236212                           | NM_001159513:721       | H2afy1        | INSIDE                 | 0.884                                                        | 2.219                          | 656.16             | 1455.91            | 1.961                          | 616.69             | 1209.22            |
| A_68_P25004862 | chr7:25217754-25217798                            | NM_199013:12925        | Irgc1         | INSIDE                 | 0.884                                                        | 2.503                          | 2781.22            | 6960.94            | 2.213                          | 2083.35            | 4609.51            |
| A_68_P27284037 | chr10:80031748-80031792                           | NM_078477:8271         | Kif16         | INSIDE                 | 0.884                                                        | 2.100                          | 1506.71            | 3164.06            | 1.857                          | 1194.85            | 2219.18            |
| A_68_P29842701 | chr14:99698407-99698451                           | NM_009769:519          | Klf5          | INSIDE                 | 0.884                                                        | 2.429                          | 574.82             | 1396.19            | 2.148                          | 590.05             | 1267.57            |
| A_68_P24979591 | chr7:16684155-16684199                            | NM_025898:185          | Napa          | INSIDE                 | 0.884                                                        | 1.766                          | 825.10             | 1457.00            | 1.561                          | 741.22             | 1156.81            |
| A_68_P29654921 | chr14:62950975-62951019                           | NM_026001:55           | Rnasch2b      | INSIDE                 | 0.884                                                        | 0.689                          | 1285.98            | 885.54             | 0.609                          | 1078.20            | 656.31             |
| A_68_P20871446 | chr1:181598547-181598591                          | NM_178653:207          | Scpdp1        | INSIDE                 | 0.884                                                        | 2.382                          | 847.75             | 2019.24            | 2.105                          | 736.66             | 1550.54            |
| A_68_P23187163 | chr4:106584892-106584936                          | NM_023672:840          | Ssbp3         | INSIDE                 | 0.884                                                        | 1.906                          | 551.29             | 1188.82            | 1.906                          | 505.26             | 962.94             |
| A_68_P30385304 | chr15:82729412-82729456                           | NR_027799:-543         | Tbrg3         | PROMOTER               | 0.884                                                        | 0.586                          | 3052.25            | 1789.00            | 0.518                          | 2394.48            | 1240.03            |
| A_68_P31215267 | chr17:48111395-48111439                           |                        |               | Unknown                | 0.884                                                        | 2.859                          | 671.03             | 1918.26            | 2.528                          | 594.96             | 1503.78            |
| A_68_P20530739 | chr1:114313105-114313149                          |                        |               | Unknown                | 0.884                                                        | 0.630                          | 2691.13            | 1694.34            | 0.557                          | 2143.10            | 1192.92            |
| A_68_P22407294 | chr3:107385858-107385902                          |                        |               | Unknown                | 0.884                                                        | 0.645                          | 2990.34            | 1927.42            | 0.570                          | 2150.88            | 1226.01            |
| A_68_P20977503 | chr2:6050985-6051029                              | NM_001159657:225       | 5430407P10Rik | INSIDE                 | 0.883                                                        | 0.453                          | 2161.70            | 979.51             | 0.400                          | 1714.00            | 685.98             |
| A_68_P28752032 | chr12:113960100-113960144                         | NM_001024602:-262      | AW555464      | PROMOTER               | 0.883                                                        | 0.612                          | 1264.74            | 773.71             | 0.540                          | 1012.69            | 547.17             |
| A_68_P27891998 | chr11:68715228-68715272                           | NR_003373:160          | Gm15772       | INSIDE                 | 0.883                                                        | 1.731                          | 988.57             | 1711.66            | 1.529                          | 904.83             | 1383.55            |

| ProbeName      | Target position of probe on CpG island microarray | TargetID               | GeneSymbol    | CpG island Description | Ratio of relative methylation (TiO <sub>2</sub> -NP/Vehicle) | Sham group                     |                    |                    | TiO <sub>2</sub> -H group      |                    |                    |
|----------------|---------------------------------------------------|------------------------|---------------|------------------------|--------------------------------------------------------------|--------------------------------|--------------------|--------------------|--------------------------------|--------------------|--------------------|
|                |                                                   |                        |               |                        |                                                              | Relative methylation (Cy5/Cy3) | Cy3 signal (Input) | Cy5 signal (MeDIP) | Relative methylation (Cy5/Cy3) | Cy3 signal (Input) | Cy5 signal (MeDIP) |
| A_68_P31863473 | chr18:80492422-80492466                           | NM_001190373:68549     | Keng2         | INSIDE                 | 0.883                                                        | 2.139                          | 537.51             | 1149.63            | 1.888                          | 492.94             | 930.62             |
| A_68_P28748273 | chr12:113399710-113399754                         | NM_001097621:15314     | Kif26a        | INSIDE                 | 0.883                                                        | 2.716                          | 962.74             | 2615.04            | 2.399                          | 697.58             | 1673.63            |
| A_68_P24171440 | chr5:147840732-147840776                          | NM_080795:47394        | Lnx2          | INSIDE                 | 0.883                                                        | 2.496                          | 2153.82            | 5375.62            | 2.203                          | 1763.11            | 3884.53            |
| A_68_P25022019 | chr7:29244304-29244350                            | NM_001141921:7070      | Lrfr1         | INSIDE                 | 0.883                                                        | 1.921                          | 859.40             | 1651.15            | 1.696                          | 742.61             | 1259.68            |
| A_68_P25343508 | chr7:103358546-103358591                          | NM_011858:-578         | Odz4          | PROMOTER               | 0.883                                                        | 2.973                          | 4745.77            | 14108.42           | 2.626                          | 3949.80            | 10372.35           |
| A_68_P28085167 | chr11:103274059-103274103                         | NM_183034:-102         | Plekhl1       | PROMOTER               | 0.883                                                        | 2.758                          | 598.75             | 1651.22            | 2.435                          | 607.68             | 1479.59            |
| A_68_P24949868 | chr7:4610619-4610663                              | NM_172894:-88          | Ppp6r1        | PROMOTER               | 0.883                                                        | 0.488                          | 1643.60            | 801.32             | 0.430                          | 1299.87            | 559.59             |
| A_68_P22412277 | chr3:108186677-108186721                          | NM_001190161:-23       | Psre1         | PROMOTER               | 0.883                                                        | 1.916                          | 1007.11            | 1929.68            | 1.692                          | 851.01             | 1439.80            |
| A_68_P29106487 | chr13:67033811-67033855                           | NM_008959:67           | Ptdss1        | INSIDE                 | 0.883                                                        | 0.563                          | 1801.66            | 1014.59            | 0.497                          | 1475.39            | 733.34             |
| A_68_P27687432 | chr11:32113340-32113384                           | NM_010117:8931         | Rhbdf1        | INSIDE                 | 0.883                                                        | 2.498                          | 1619.09            | 4043.93            | 2.206                          | 1199.30            | 2645.07            |
| A_68_P26522398 | chr9:53619438-53619482                            | NM_028060:119          | Slc35f2       | INSIDE                 | 0.883                                                        | 0.467                          | 1630.81            | 761.64             | 0.412                          | 1242.05            | 512.29             |
| A_68_P23364321 | chr4:141034275-141034319                          | NM_019763:60216        | Spen          | INSIDE                 | 0.883                                                        | 2.405                          | 879.25             | 2114.58            | 2.123                          | 734.20             | 1558.94            |
| A_68_P29455872 | chr14:22804750-22804794                           | NM_145459:4051         | Zfp503        | INSIDE                 | 0.883                                                        | 0.494                          | 1055.14            | 521.10             | 0.436                          | 868.70             | 378.86             |
| A_68_P28724516 | chr12:109154117-109154161                         | NM_001079883:87486     | Bcl11b        | INSIDE                 | 0.882                                                        | 2.757                          | 551.62             | 1520.91            | 2.432                          | 492.18             | 1196.84            |
| A_68_P29941712 | chr14:119322120-119322164                         | NM_025943:247          | Dzip1         | INSIDE                 | 0.882                                                        | 0.652                          | 2030.30            | 1324.24            | 0.576                          | 1648.09            | 948.50             |
| A_68_P24620282 | chr6:88139868-88139912                            | NM_008090:-8767        | Gata2         | PROMOTER               | 0.882                                                        | 0.601                          | 1261.08            | 758.45             | 0.530                          | 1063.46            | 563.81             |
| A_68_P28516080 | chr12:70825874-70825918                           | NM_145443:-35          | L2hgdh        | DIVERGENT_PROMOTER     | 0.882                                                        | 0.558                          | 1239.16            | 691.65             | 0.493                          | 1025.60            | 505.12             |
| A_68_P27854124 | chr11:62270784-62270828                           | NM_011308:28           | Ncor1         | INSIDE                 | 0.882                                                        | 1.715                          | 2120.57            | 3636.39            | 1.512                          | 1814.20            | 2743.19            |
| A_68_P26136321 | chr8:108378956-108379000                          | NM_021513:-24          | Thap11        | DIVERGENT_PROMOTER     | 0.882                                                        | 0.608                          | 1669.23            | 1014.36            | 0.536                          | 1534.73            | 822.50             |
| A_68_P24427164 | chr6:48388295-48388339                            | NM_001085415:6773      | Zfp467        | INSIDE                 | 0.882                                                        | 1.709                          | 1225.02            | 2093.33            | 1.507                          | 995.08             | 1499.35            |
| A_68_P25505621 | chr7:134587797-134587841                          | NM_175163:4854         | Zfp689        | INSIDE                 | 0.882                                                        | 2.613                          | 1207.11            | 3154.03            | 2.305                          | 1017.64            | 2345.25            |
| A_68_P22086836 | chr3:41643672-41643716                            |                        | Unknown       |                        | 0.882                                                        | 3.462                          | 1857.26            | 6429.11            | 3.054                          | 1641.30            | 5011.80            |
| A_68_P23383664 | chr4:145167106-145167158                          | ENSMUST00000117838:63  |               | INSIDE                 | 0.882                                                        | 3.054                          | 582.83             | 1779.91            | 2.694                          | 430.09             | 1158.66            |
| A_68_P27288891 | chr10:80788278-80788322                           | NM_027381:4453         | 2510012J08Rik | INSIDE                 | 0.881                                                        | 2.577                          | 5444.06            | 14031.83           | 2.271                          | 4378.63            | 9941.86            |
| A_68_P23542802 | chr5:24083177-24083221                            | NM_001190443:87        | Abcf2         | INSIDE                 | 0.881                                                        | 0.564                          | 1243.51            | 701.42             | 0.497                          | 942.44             | 468.12             |
| A_68_P24298740 | chr6:23788658-23788702                            | NM_153163:620          | Cadps2        | INSIDE                 | 0.881                                                        | 0.559                          | 1377.29            | 769.96             | 0.493                          | 1170.14            | 576.51             |
| A_68_P20354307 | chr1:75471829-75471873                            | NM_001001565:4196      | Chpf          | INSIDE                 | 0.881                                                        | 2.373                          | 427.64             | 1014.80            | 2.091                          | 433.24             | 905.96             |
| A_68_P21134369 | chr2:35438463-35438507                            | NM_001114125:24507     | Dab2ip        | INSIDE                 | 0.881                                                        | 2.114                          | 729.69             | 1542.34            | 1.862                          | 671.43             | 1249.92            |
| A_68_P25021008 | chr7:29079932-29079976                            | NM_007866:6850         | Dll3          | INSIDE                 | 0.881                                                        | 0.673                          | 1733.19            | 1165.99            | 0.593                          | 1420.20            | 841.87             |
| A_68_P26761431 | chr9:98856538-98856582                            | NM_012020:535          | Foxl2         | INSIDE                 | 0.881                                                        | 0.643                          | 928.63             | 596.97             | 0.566                          | 839.59             | 475.53             |
| A_68_P28087337 | chr11:103672587-103672632                         | NM_009521:37121        | Wnt3          | INSIDE                 | 0.881                                                        | 1.767                          | 842.47             | 1488.64            | 1.556                          | 640.74             | 997.27             |
| A_68_P26913056 | chr10:5959839-5959883                             | NM_001033466:1428      | Zbtb2         | INSIDE                 | 0.881                                                        | 1.987                          | 718.02             | 1426.92            | 1.750                          | 687.92             | 1203.76            |
| A_68_P29285955 | chr13:104383068-104383112                         | BC099526:114623        |               | INSIDE                 | 0.881                                                        | 2.201                          | 742.43             | 1634.06            | 1.939                          | 619.61             | 1201.68            |
| A_68_P30665009 | chr16:34572678-34572722                           | ENSMUST00000114961:918 |               | INSIDE                 | 0.881                                                        | 0.508                          | 1110.04            | 564.23             | 0.448                          | 896.30             | 401.28             |
| A_68_P26221248 | chr8:123112748-123112792                          | NM_178856:205          | Gins2         | INSIDE                 | 0.880                                                        | 0.420                          | 1921.46            | 807.71             | 0.370                          | 1507.14            | 557.72             |
| A_68_P27286894 | chr10:80477702-80477746                           | NM_010319:-54          | Gng7          | PROMOTER               | 0.880                                                        | 0.648                          | 1241.59            | 803.96             | 0.570                          | 894.68             | 509.65             |
| A_68_P26847145 | chr9:114842599-114842643                          | NM_175380:485          | Gpd11         | INSIDE                 | 0.880                                                        | 0.562                          | 987.56             | 554.65             | 0.494                          | 807.18             | 398.85             |
| A_68_P21750931 | chr2:152565335-152565379                          | NM_010495:3347         | Id1           | DOWNSTREAM             | 0.880                                                        | 0.597                          | 1356.17            | 809.72             | 0.526                          | 1255.72            | 659.90             |
| A_68_P30343807 | chr15:75577030-75577074                           | NM_194350:1300         | Mafa          | DOWNSTREAM             | 0.880                                                        | 2.352                          | 708.34             | 1666.16            | 2.069                          | 642.84             | 1329.94            |
| A_68_P30086028 | chr15:26239162-26239206                           | NM_177597:358          | Marchfl1      | INSIDE                 | 0.880                                                        | 1.952                          | 531.23             | 1036.89            | 1.718                          | 459.45             | 789.12             |
| A_68_P22509668 | chr3:127328592-127328639                          | NM_009718:-7447        | Neurog2       | PROMOTER               | 0.880                                                        | 1.605                          | 1673.53            | 2685.52            | 1.412                          | 1283.43            | 1811.95            |
| A_68_P24643138 | chr6:92041251-92041295                            | NM_011630:-139         | Nr2c2         | PROMOTER               | 0.880                                                        | 2.086                          | 473.24             | 987.24             | 1.835                          | 516.44             | 947.91             |
| A_68_P26747582 | chr9:96437440-96437484                            | NM_053268:94460        | Rasa2         | DOWNSTREAM             | 0.880                                                        | 2.073                          | 1342.99            | 2784.05            | 1.825                          | 1210.32            | 2208.29            |
| A_68_P22063905 | chr3:37380234-37380278                            | NM_00116351:161055     | Spata5        | INSIDE                 | 0.880                                                        | 2.127                          | 517.41             | 1100.28            | 1.871                          | 461.17             | 862.66             |
| A_68_P24019921 | chr5:117769319-117769363                          | NM_001033311:66        | Vsig10        | INSIDE                 | 0.880                                                        | 0.630                          | 1377.61            | 867.31             | 0.554                          | 1042.02            | 577.15             |
| A_68_P24793131 | chr6:119390505-119390549                          | NM_009525:103839       | Wnt5b         | INSIDE                 | 0.880                                                        | 1.948                          | 968.91             | 1887.87            | 1.715                          | 832.27             | 1426.99            |
| A_68_P31620633 | chr18:36033456-36033500                           |                        | Unknown       |                        | 0.880                                                        | 0.555                          | 1099.80            | 610.31             | 0.488                          | 909.51             | 443.96             |
| A_68_P23962133 | chr5:107003460-107003504                          | ENSMUST00000131029:252 |               | INSIDE                 | 0.880                                                        | 2.076                          | 767.97             | 1594.15            | 1.826                          | 704.15             | 1285.79            |
| A_68_P28608876 | chr12:87585301-87585347                           | NM_027405:2497         | 1700020O03Rik | INSIDE                 | 0.879                                                        | 1.996                          | 563.91             | 1125.56            | 1.755                          | 455.50             | 799.53             |
| A_68_P23415137 | chr4:151236473-151236517                          | NM_001081557:-617      | Camta1        | PROMOTER               | 0.879                                                        | 0.534                          | 1227.32            | 655.38             | 0.469                          | 987.73             | 463.39             |
| A_68_P33015624 | chr1_random:51004-51048                           | NM_026866:134312       | Disp1         | INSIDE                 | 0.879                                                        | 2.084                          | 598.72             | 1247.50            | 1.832                          | 487.48             | 892.85             |

| ProbeName      | Target position of probe on CpG island microarray | TargetID           | GeneSymbol    | CpG island Description | Ratio of relative methylation (TiO <sub>2</sub> -NP/Vehicle) | Sham group                     |                    |                    | TiO <sub>2</sub> -H group      |                    |                    |
|----------------|---------------------------------------------------|--------------------|---------------|------------------------|--------------------------------------------------------------|--------------------------------|--------------------|--------------------|--------------------------------|--------------------|--------------------|
|                |                                                   |                    |               |                        |                                                              | Relative methylation (Cy5/Cy3) | Cy3 signal (Input) | Cy5 signal (MeDIP) | Relative methylation (Cy5/Cy3) | Cy3 signal (Input) | Cy5 signal (MeDIP) |
| A_68_P21007902 | chr2:11698864-11698908                            | NM_015792:268      | Fbxo18        | INSIDE                 | 0.879                                                        | 0.468                          | 1190.76            | 557.58             | 0.412                          | 918.09             | 378.05             |
| A_68_P24025035 | chr5:118619751-118619795                          | NM_007545:0        | Hrk           | INSIDE                 | 0.879                                                        | 2.156                          | 2006.56            | 4326.29            | 1.895                          | 1761.89            | 3338.29            |
| A_68_P26270746 | chr8:131209434-131209478                          | NM_010578:-97      | Igfb1         | PROMOTER               | 0.879                                                        | 0.497                          | 2107.81            | 1048.05            | 0.437                          | 1682.40            | 735.33             |
| A_68_P31930917 | chr19:5803602-5803646                             | NR_002847:-953     | Malat1        | PROMOTER               | 0.879                                                        | 0.512                          | 2164.12            | 1107.04            | 0.449                          | 1779.38            | 799.77             |
| A_68_P24065430 | chr5:125659058-125659102                          | NM_011424:504      | Ncor2         | INSIDE                 | 0.879                                                        | 0.637                          | 892.22             | 568.14             | 0.560                          | 784.37             | 438.91             |
| A_68_P23184551 | chr4:106136489-106136533                          | NM_153565:420      | Pesck9        | INSIDE                 | 0.879                                                        | 0.527                          | 1329.89            | 701.39             | 0.464                          | 1209.62            | 560.90             |
| A_68_P26843527 | chr9:113966461-113966505                          | NM_001101510:11    | Susd5         | INSIDE                 | 0.879                                                        | 1.680                          | 1375.33            | 2310.10            | 1.476                          | 1348.70            | 1991.20            |
| A_68_P31101670 | chr17:25252921-25252965                           | NM_001163661:-30   | Telo2         | DIVERGENT_PROMOTER     | 0.879                                                        | 2.479                          | 1251.80            | 3103.49            | 2.178                          | 937.42             | 2041.89            |
| A_68_P28031427 | chr11:94073436-94073480                           | NM_009427:691      | Tob1          | INSIDE                 | 0.879                                                        | 1.841                          | 522.92             | 962.51             | 1.618                          | 493.48             | 798.44             |
| A_68_P25092433 | chr7:52582778-52582822                            | NM_175130:6350     | Trpm4         | INSIDE                 | 0.879                                                        | 3.047                          | 1093.75            | 3332.89            | 2.680                          | 958.23             | 2567.65            |
| A_68_P31403188 | chr17:84585249-84585293                           | NM_001001806:2017  | Zfp3612       | INSIDE                 | 0.879                                                        | 0.746                          | 3473.86            | 2590.14            | 0.656                          | 2997.06            | 1964.78            |
| A_68_P22341860 | chr3:94819980-94820024                            | NM_030074:-842     | Zfp687        | PROMOTER               | 0.879                                                        | 0.596                          | 946.71             | 564.18             | 0.524                          | 835.88             | 437.77             |
| A_68_P29502989 | chr14:30791625-30791669                           | NM_027493:124      | Actr8         | INSIDE                 | 0.878                                                        | 2.037                          | 1741.90            | 3547.43            | 1.788                          | 1385.59            | 2477.26            |
| A_68_P27226082 | chr10:69284986-69285030                           | NM_146005:288553   | Ank3          | INSIDE                 | 0.878                                                        | 2.411                          | 636.18             | 1533.98            | 2.118                          | 503.14             | 1065.59            |
| A_68_P32262595 | chrX:12165037-12165081                            | NM_027439:174      | Atp6ap2       | INSIDE                 | 0.878                                                        | 2.231                          | 2195.93            | 4898.77            | 1.959                          | 919.05             | 1800.24            |
| A_68_P28221298 | chr12:8305600-8305644                             | NM_013527:3138     | Gdf7          | INSIDE                 | 0.878                                                        | 2.409                          | 1459.90            | 3517.04            | 2.116                          | 1270.55            | 2688.73            |
| A_68_P32016033 | chr19:23209323-23209367                           | NM_010638:-6371    | Klf9          | PROMOTER               | 0.878                                                        | 1.812                          | 5407.44            | 9800.32            | 1.591                          | 3861.51            | 6143.24            |
| A_68_P21037798 | chr2:17948361-17948405                            | NR_028378:-493     | LOC100034739  | PROMOTER               | 0.878                                                        | 0.475                          | 1486.45            | 705.99             | 0.417                          | 1338.60            | 558.44             |
| A_68_P31127481 | chr17:29484296-29484340                           | NM_019880:531      | Mtch1         | INSIDE                 | 0.878                                                        | 2.942                          | 9126.89            | 26850.41           | 2.584                          | 5692.52            | 14707.71           |
| A_68_P24483715 | chr6:58856617-58856661                            | NM_021432:482      | Nap1l5        | INSIDE                 | 0.878                                                        | 1.600                          | 1411.86            | 2258.41            | 1.405                          | 1079.94            | 1516.88            |
| A_68_P31421200 | chr17:87506806-87506850                           | NM_019654:-190     | Socs5         | PROMOTER               | 0.878                                                        | 1.941                          | 1005.91            | 1952.40            | 1.705                          | 827.43             | 1410.48            |
| A_68_P22385232 | chr3:103083556-103083600                          | NM_001079830:363   | Trim33        | INSIDE                 | 0.878                                                        | 2.213                          | 475.63             | 1052.78            | 1.943                          | 457.62             | 889.07             |
| A_68_P22382655 | chr3:102538658-102538702                          | NM_027533:-12      | Tspan2        | PROMOTER               | 0.878                                                        | 1.666                          | 1465.85            | 2442.37            | 1.463                          | 1047.61            | 1532.58            |
| A_68_P26036156 | chr8:90184417-90184461                            | NM_033327:299056   | Zfp423        | DOWNSTREAM             | 0.878                                                        | 0.672                          | 1609.80            | 1082.00            | 0.590                          | 1253.79            | 739.63             |
| A_68_P23424870 | chr4:152806765-152806809                          | NM_001099299:50153 | Ajap1         | INSIDE                 | 0.877                                                        | 2.823                          | 844.85             | 2385.25            | 2.475                          | 778.38             | 1926.29            |
| A_68_P23767825 | chr5:67818729-67818773                            | NM_001164806:288   | Bend4         | INSIDE                 | 0.877                                                        | 1.872                          | 890.42             | 1667.27            | 1.642                          | 799.12             | 1312.05            |
| A_68_P27673731 | chr11:29147082-29147126                           | NM_025740:168      | Ccdc104       | INSIDE                 | 0.877                                                        | 0.607                          | 2592.11            | 1573.95            | 0.533                          | 2048.30            | 1091.15            |
| A_68_P21822532 | chr2:165058963-165059007                          | NM_174988:1253     | Cdh22         | INSIDE                 | 0.877                                                        | 0.600                          | 2771.82            | 1663.64            | 0.526                          | 2139.77            | 1126.16            |
| A_68_P23270849 | chr4:124559951-124559995                          | NM_177671:944      | Epha10        | INSIDE                 | 0.877                                                        | 0.650                          | 1196.97            | 778.12             | 0.570                          | 1084.26            | 618.41             |
| A_68_P26156366 | chr8:111864799-111864851                          | NR_002928:-16      | Gm1943        | PROMOTER               | 0.877                                                        | 2.203                          | 530.44             | 1168.49            | 1.932                          | 457.17             | 883.10             |
| A_68_P26804348 | chr9:106549759-106549803                          | NM_001160353:8660  | Grm2          | INSIDE                 | 0.877                                                        | 2.262                          | 1147.04            | 2594.88            | 1.983                          | 949.81             | 1883.67            |
| A_68_P28043433 | chr11:96144433-96144477                           | NM_010461:1236     | Hoxb8         | INSIDE                 | 0.877                                                        | 0.594                          | 1738.00            | 1031.92            | 0.521                          | 1465.23            | 763.06             |
| A_68_P22957168 | chr4:59594155-59594199                            | NM_024255:-258     | Hsd12         | PROMOTER               | 0.877                                                        | 2.022                          | 2614.58            | 5286.23            | 1.773                          | 2108.68            | 3737.94            |
| A_68_P23611442 | chr5:37482587-37482631                            | NM_178394:40513    | Jakmip1       | INSIDE                 | 0.877                                                        | 2.693                          | 235.16             | 633.34             | 2.361                          | 203.14             | 479.69             |
| A_68_P25406536 | chr7:116313170-116313214                          | NM_057173:630      | Lmo1          | INSIDE                 | 0.877                                                        | 0.608                          | 969.60             | 589.95             | 0.533                          | 764.70             | 407.94             |
| A_68_P27535213 | chr10:126748669-126748713                         | NM_001003913:152   | Mars          | INSIDE                 | 0.877                                                        | 0.679                          | 1274.04            | 864.85             | 0.596                          | 1121.64            | 668.03             |
| A_68_P20506811 | chr1:108069599-108069643                          | NM_133821:1175     | Phlpp1        | INSIDE                 | 0.877                                                        | 0.503                          | 1391.74            | 700.18             | 0.441                          | 1156.96            | 510.72             |
| A_68_P30346972 | chr15:76062477-76062521                           | NM_001163542:-690  | Plec          | PROMOTER               | 0.877                                                        | 0.506                          | 1128.23            | 570.93             | 0.444                          | 875.00             | 388.38             |
| A_68_P30969342 | chr16:92466123-92466167                           | NM_001081549:247   | Recan1        | INSIDE                 | 0.877                                                        | 0.664                          | 1600.56            | 1063.38            | 0.583                          | 1306.95            | 761.58             |
| A_68_P28535267 | chr12:74146949-74146993                           | NM_009189:729      | Six1          | INSIDE                 | 0.877                                                        | 0.672                          | 984.82             | 661.31             | 0.589                          | 732.01             | 431.03             |
| A_68_P25957634 | chr8:74108737-74108781                            | NM_011977:15933    | Slc27a1       | INSIDE                 | 0.877                                                        | 2.589                          | 774.69             | 2006.03            | 2.272                          | 641.74             | 1458.11            |
| A_68_P27911318 | chr11:72225271-72225315                           | NM_177776:-77      | Smtnl2        | PROMOTER               | 0.877                                                        | 0.443                          | 2457.74            | 1088.17            | 0.388                          | 2042.36            | 792.63             |
| A_68_P22314616 | chr3:88383591-88383635                            | NM_025448:20       | Ssr2          | INSIDE                 | 0.877                                                        | 0.467                          | 1128.02            | 527.09             | 0.410                          | 939.00             | 384.58             |
| A_68_P21815997 | chr2:163899961-163900005                          | NM_021420:69       | Stk4          | INSIDE                 | 0.877                                                        | 0.627                          | 927.36             | 581.07             | 0.550                          | 816.48             | 448.66             |
| A_68_P21747903 | chr2:151969066-151969110                          | NM_009328:-256     | Tcf15         | PROMOTER               | 0.877                                                        | 0.522                          | 1197.47            | 624.63             | 0.457                          | 988.92             | 452.27             |
| A_68_P22894265 | chr4:47366582-47366626                            | NM_009370:428      | Tgfbf1        | INSIDE                 | 0.877                                                        | 1.831                          | 1099.21            | 2012.41            | 1.606                          | 1002.71            | 1610.29            |
| A_68_P29023542 | chr13:49242589-49242633                           | NM_029361:773      | Wnk2          | INSIDE                 | 0.877                                                        | 1.866                          | 949.60             | 1771.74            | 1.637                          | 868.31             | 1421.13            |
| A_68_P27563766 | chr11:5420720-5420764                             | NM_013842:-227     | Xbp1          | PROMOTER               | 0.877                                                        | 0.475                          | 1171.89            | 556.12             | 0.416                          | 995.63             | 414.25             |
| A_68_P25842776 | chr8:48732206-48732250                            |                    |               | Unknown                | 0.877                                                        | 2.461                          | 489.53             | 1204.91            | 2.157                          | 461.34             | 995.28             |
| A_68_P28183803 | chr11:120166774-120166818                         |                    |               | Unknown                | 0.877                                                        | 0.609                          | 2320.91            | 1414.24            | 0.534                          | 1954.13            | 1043.99            |
| A_68_P27288892 | chr10:80788388-80788440                           | NM_027381:4567     | 2510012108Rik | INSIDE                 | 0.876                                                        | 3.218                          | 1342.72            | 4321.14            | 2.820                          | 1074.69            | 3030.46            |

| ProbeName      | Target position of probe on CpG island microarray | TargetID                 | GeneSymbol | CpG island Description | Ratio of relative methylation (TiO <sub>2</sub> -NP/Vehicle) | Sham group                     |                    |                    | TiO <sub>2</sub> -H group      |                    |                    |
|----------------|---------------------------------------------------|--------------------------|------------|------------------------|--------------------------------------------------------------|--------------------------------|--------------------|--------------------|--------------------------------|--------------------|--------------------|
|                |                                                   |                          |            |                        |                                                              | Relative methylation (Cy5/Cy3) | Cy3 signal (Input) | Cy5 signal (MeDIP) | Relative methylation (Cy5/Cy3) | Cy3 signal (Input) | Cy5 signal (MeDIP) |
| A_68_P26553627 | chr9:59333545-59333589                            | NM_019927:615            | Arlh1      | INSIDE                 | 0.876                                                        | 0.420                          | 1804.53            | 757.95             | 0.368                          | 1462.24            | 538.00             |
| A_68_P25617307 | chr8:4325222-4325266                              | NR_033527:35             | Cel25      | INSIDE                 | 0.876                                                        | 0.498                          | 1128.92            | 562.59             | 0.437                          | 946.00             | 413.20             |
| A_68_P24120337 | chr5:136750787-136750831                          | NM_198602:292467         | Cux1       | INSIDE                 | 0.876                                                        | 2.919                          | 259.86             | 758.47             | 2.556                          | 282.14             | 721.23             |
| A_68_P31150931 | chr17:34048707-34048751                           | NM_001199733:2183        | Daxx       | INSIDE                 | 0.876                                                        | 2.611                          | 597.45             | 1559.83            | 2.286                          | 573.32             | 1310.69            |
| A_68_P21569026 | chr2:119148000-119148050                          | NM_019454:-3495          | Dll4       | PROMOTER               | 0.876                                                        | 0.654                          | 977.03             | 638.96             | 0.573                          | 750.88             | 430.09             |
| A_68_P28429305 | chr12:52449483-52449527                           | NM_001015099:288         | G2e3       | INSIDE                 | 0.876                                                        | 2.516                          | 312.43             | 786.10             | 2.205                          | 307.14             | 677.14             |
| A_68_P24451818 | chr6:52590402-52590446                            | NM_145567:-130           | Hibadh     | PROMOTER               | 0.876                                                        | 3.545                          | 1061.80            | 3764.10            | 3.105                          | 841.52             | 2613.18            |
| A_68_P27340040 | chr10:90564963-90565014                           | NM_027078:19205          | Ikbip      | INSIDE                 | 0.876                                                        | 3.832                          | 516.65             | 1979.63            | 3.357                          | 422.66             | 1418.85            |
| A_68_P23318790 | chr4:133228292-133228336                          | NM_001145955:248         | Pigv       | INSIDE                 | 0.876                                                        | 0.628                          | 1537.22            | 965.66             | 0.550                          | 1378.04            | 758.04             |
| A_68_P29701215 | chr14:70829074-70829118                           | NM_021308:-195           | Piwil2     | PROMOTER               | 0.876                                                        | 1.668                          | 3250.31            | 5422.05            | 1.462                          | 2693.08            | 3936.18            |
| A_68_P22405767 | chr3:107145905-107145949                          | NM_001045807:-9719       | Rbm15      | PROMOTER               | 0.876                                                        | 3.020                          | 324.18             | 979.09             | 2.645                          | 317.58             | 839.86             |
| A_68_P30575793 | chr16:17804490-17804534                           | NM_153790:7138           | Scar2      | INSIDE                 | 0.876                                                        | 0.597                          | 1746.76            | 1042.25            | 0.523                          | 1495.73            | 781.76             |
| A_68_P28038654 | chr11:95275393-95275437                           | NM_025287:18             | Spop       | INSIDE                 | 0.876                                                        | 1.642                          | 2808.11            | 4609.75            | 1.437                          | 2234.70            | 3211.87            |
| A_68_P27340414 | chr10:90634556-90634600                           | NM_001080129:-251        | Tmpo       | PROMOTER               | 0.876                                                        | 0.733                          | 2305.27            | 1689.13            | 0.642                          | 1912.46            | 1228.07            |
| A_68_P29052710 | chr13:55098681-55098725                           | NM_153131:47910          | Unc5a      | INSIDE                 | 0.876                                                        | 2.258                          | 1458.83            | 3293.84            | 1.978                          | 1203.00            | 2378.94            |
| A_68_P27285197 | chr10:80204884-80204928                           | NM_007460:50             | Ap3d1      | INSIDE                 | 0.875                                                        | 0.663                          | 959.79             | 636.45             | 0.580                          | 776.06             | 450.31             |
| A_68_P26356129 | chr9:23027849-23027893                            | NM_028472:351            | Bmper      | INSIDE                 | 0.875                                                        | 0.657                          | 1299.35            | 853.82             | 0.575                          | 1130.27            | 649.66             |
| A_68_P33007789 | chr4_random:128217-128261                         | NM_001033326:18437       | Dhrsx      | INSIDE                 | 0.875                                                        | 1.882                          | 2204.84            | 4149.44            | 1.647                          | 1811.37            | 2982.56            |
| A_68_P25108777 | chr7:56136031-56136075                            | NM_001013368:359         | E2f8       | INSIDE                 | 0.875                                                        | 0.607                          | 1125.83            | 683.74             | 0.531                          | 1032.82            | 548.73             |
| A_68_P25005646 | chr7:25370925-25370969                            | NM_023154:-1615          | Ethe1      | PROMOTER               | 0.875                                                        | 2.250                          | 5331.10            | 11992.35           | 1.969                          | 3886.69            | 7654.13            |
| A_68_P25827402 | chr8:46036102-46036161                            | NM_001081286:570         | Fat1       | INSIDE                 | 0.875                                                        | 2.330                          | 1150.14            | 2680.06            | 2.040                          | 820.64             | 1674.08            |
| A_68_P31927962 | chr19:5306803-5306849                             | NM_001024717:8496        | Gal3st3    | INSIDE                 | 0.875                                                        | 2.837                          | 379.24             | 1075.97            | 2.481                          | 338.69             | 840.40             |
| A_68_P31927965 | chr19:5307061-5307105                             | NM_001024717:8752        | Gal3st3    | INSIDE                 | 0.875                                                        | 2.051                          | 1187.86            | 2436.13            | 1.795                          | 1079.42            | 1938.05            |
| A_68_P30347069 | chr15:76077165-76077209                           | NM_023168:-50            | Grina      | DIVERGENT_PROMOTER     | 0.875                                                        | 0.737                          | 4098.15            | 3022.21            | 0.646                          | 3129.19            | 2020.11            |
| A_68_P27995154 | chr11:87431401-87431445                           | NM_001045527:757         | Hsf5       | INSIDE                 | 0.875                                                        | 2.391                          | 1279.29            | 3059.40            | 2.091                          | 1056.67            | 2209.95            |
| A_68_P22885280 | chr4:45839410-45839454                            | NM_018741:267            | Igfbp11    | INSIDE                 | 0.875                                                        | 1.661                          | 1465.95            | 2435.45            | 1.454                          | 1263.17            | 1836.21            |
| A_68_P20725329 | chr1:155033264-155033308                          | NM_008485:291            | Lame2      | INSIDE                 | 0.875                                                        | 0.624                          | 971.45             | 606.51             | 0.546                          | 824.56             | 450.51             |
| A_68_P27911829 | chr11:72303431-72303475                           | NM_153060:-46            | Spns2      | PROMOTER               | 0.875                                                        | 2.874                          | 284.38             | 817.41             | 2.516                          | 265.35             | 667.65             |
| A_68_P26234571 | chr8:125135662-125135707                          | NM_021502:159            | Trappe21   | INSIDE                 | 0.875                                                        | 0.679                          | 1759.88            | 1194.45            | 0.594                          | 1268.27            | 752.95             |
| A_68_P24874653 | chr6:136776590-136776634                          | NM_021714:125            | Wbp11      | INSIDE                 | 0.875                                                        | 0.519                          | 2131.40            | 1106.10            | 0.454                          | 1793.56            | 814.49             |
| A_68_P30558815 | chr16:13754812-13754856                           | AK044312:176             |            | INSIDE                 | 0.875                                                        | 0.605                          | 1619.73            | 979.75             | 0.529                          | 1199.97            | 635.29             |
| A_68_P21705754 | chr2:143991432-143991476                          | ENSMUST00000099292:23572 |            | DOWNSTREAM             | 0.875                                                        | 0.586                          | 1016.88            | 595.40             | 0.512                          | 857.74             | 439.39             |
| A_68_P31762240 | chr18:62339500-62339544                           | NM_007420:91             | Adrb2      | INSIDE                 | 0.874                                                        | 2.929                          | 2026.26            | 5934.03            | 2.560                          | 1798.58            | 4605.07            |
| A_68_P30404230 | chr15:85809331-85809375                           | NM_009886:54855          | Celsr1     | INSIDE                 | 0.874                                                        | 2.855                          | 1537.19            | 4387.99            | 2.496                          | 1131.76            | 2825.03            |
| A_68_P26127987 | chr8:106864391-106864435                          | NM_024217:-81            | Cmtm3      | PROMOTER               | 0.874                                                        | 4.979                          | 12296.25           | 61227.81           | 4.354                          | 7343.52            | 31972.60           |
| A_68_P23246056 | chr4:119212030-119212074                          | NM_172699:-240           | Foxj3      | DIVERGENT_PROMOTER     | 0.874                                                        | 0.603                          | 1433.67            | 863.88             | 0.527                          | 1228.07            | 647.03             |
| A_68_P25971957 | chr8:77617610-77617654                            | NM_010442:116            | Hmox1      | INSIDE                 | 0.874                                                        | 0.641                          | 893.64             | 572.73             | 0.560                          | 807.91             | 452.65             |
| A_68_P30650136 | chr16:31933025-31933069                           | NM_172822:-890           | Pigz       | PROMOTER               | 0.874                                                        | 0.355                          | 1614.70            | 573.00             | 0.310                          | 1301.58            | 403.71             |
| A_68_P30489220 | chr15:100870918-100870964                         | NM_011323:104239         | Scn8a      | INSIDE                 | 0.874                                                        | 6.479                          | 1711.41            | 11087.85           | 5.661                          | 1228.12            | 6952.74            |
| A_68_P25021510 | chr7:29163296-29163340                            | NM_011756:929            | Zfp36      | INSIDE                 | 0.874                                                        | 3.055                          | 2225.08            | 6796.90            | 2.670                          | 1755.38            | 4686.07            |
| A_68_P24319372 | chr6:28212314-28212358                            | NM_001081678:-735        | Zfp800     | PROMOTER               | 0.874                                                        | 1.957                          | 1196.51            | 2341.41            | 1.711                          | 1061.10            | 1815.23            |
| A_68_P25947616 | chr8:72178703-72178747                            | NM_001177527:270         | Zfp964     | INSIDE                 | 0.874                                                        | 1.646                          | 1082.53            | 1781.71            | 1.438                          | 1051.95            | 1513.00            |
| A_68_P31092624 | chr17:23747448-23747492                           | NM_001033425:9648        | Zscan10    | INSIDE                 | 0.874                                                        | 1.828                          | 2065.27            | 3775.57            | 1.599                          | 1601.32            | 2559.97            |
| A_68_P31157813 | chr17:35272266-35272310                           | NM_057171:102            | Bag6       | INSIDE                 | 0.873                                                        | 0.617                          | 1039.82            | 641.14             | 0.538                          | 714.78             | 384.63             |
| A_68_P32287114 | chrX:19637038-19637082                            | NM_021715:365            | Chst7      | INSIDE                 | 0.873                                                        | 1.949                          | 1259.55            | 2454.89            | 1.701                          | 643.37             | 1094.32            |
| A_68_P20825163 | chr1:172815285-172815329                          | NM_023173:365            | Dusp12     | INSIDE                 | 0.873                                                        | 0.698                          | 1268.96            | 885.60             | 0.609                          | 1048.39            | 638.71             |
| A_68_P31114356 | chr17:27252698-27252742                           | NM_080553:58472          | Iptr3      | INSIDE                 | 0.873                                                        | 2.966                          | 744.82             | 2209.27            | 2.588                          | 511.35             | 1323.55            |
| A_68_P28997653 | chr13:44825548-44825592                           | NM_001205044:-572        | Jarid2     | PROMOTER               | 0.873                                                        | 2.320                          | 394.62             | 915.52             | 2.025                          | 388.99             | 787.65             |
| A_68_P22934428 | chr4:55544566-55544610                            | NM_010637:759            | Klf4       | INSIDE                 | 0.873                                                        | 0.659                          | 899.77             | 592.68             | 0.575                          | 783.94             | 450.72             |
| A_68_P22009790 | chr3:27081996-27082040                            | NM_178772:93             | Nceh1      | INSIDE                 | 0.873                                                        | 0.389                          | 1543.25            | 600.22             | 0.340                          | 1256.59            | 426.71             |
| A_68_P23419144 | chr4:151852440-151852484                          | NM_153424:212            | Nphp4      | INSIDE                 | 0.873                                                        | 0.550                          | 2401.43            | 1319.96            | 0.480                          | 1842.79            | 884.19             |

| ProbeName      | Target position of probe on CpG island microarray | TargetID           | GeneSymbol    | CpG island Description | Ratio of relative methylation (TiO <sub>2</sub> -NP/Vehicle) | Sham group                     |                    |                    | TiO <sub>2</sub> -H group      |                    |                    |
|----------------|---------------------------------------------------|--------------------|---------------|------------------------|--------------------------------------------------------------|--------------------------------|--------------------|--------------------|--------------------------------|--------------------|--------------------|
|                |                                                   |                    |               |                        |                                                              | Relative methylation (Cy5/Cy3) | Cy3 signal (Input) | Cy5 signal (MeDIP) | Relative methylation (Cy5/Cy3) | Cy3 signal (Input) | Cy5 signal (MeDIP) |
| A_68_P27921013 | chr11:74336837-74336884                           | NM_001015046:66800 | Rap1gap2      | INSIDE                 | 0.873                                                        | 0.728                          | 2592.51            | 1888.10            | 0.635                          | 2117.39            | 1345.49            |
| A_68_P23294684 | chr4:128736191-128736235                          | NM_029219:698      | Rnf19b        | INSIDE                 | 0.873                                                        | 0.610                          | 1738.68            | 1060.61            | 0.533                          | 1508.23            | 803.54             |
| A_68_P30953525 | chr16:89885381-89885425                           | NM_009384:75670    | Tiam1         | INSIDE                 | 0.873                                                        | 2.170                          | 379.66             | 823.93             | 1.894                          | 358.22             | 678.40             |
| A_68_P23991347 | chr5:112737115-112737159                          | NM_009419:31410    | Tpst2         | INSIDE                 | 0.873                                                        | 2.471                          | 1425.99            | 3522.92            | 2.156                          | 1061.89            | 2289.65            |
| A_68_P24084073 | chr5:129106395-129106439                          | NR_015517:146      | 5930412G12Rik | INSIDE                 | 0.872                                                        | 0.640                          | 846.04             | 541.27             | 0.558                          | 667.89             | 372.70             |
| A_68_P24925496 | chr6:145814867-145814912                          | NM_024469:-1029    | Bhlhe41       | PROMOTER               | 0.872                                                        | 0.637                          | 1531.95            | 975.27             | 0.555                          | 1233.23            | 685.00             |
| A_68_P27839286 | chr11:59653097-59653142                           | NM_011991:150      | Cops3         | INSIDE                 | 0.872                                                        | 0.543                          | 1527.69            | 830.07             | 0.474                          | 1156.18            | 547.89             |
| A_68_P30361555 | chr15:78502500-78502544                           | NM_183141:46021    | Elfn2         | INSIDE                 | 0.872                                                        | 2.885                          | 447.59             | 1291.39            | 2.515                          | 372.33             | 936.37             |
| A_68_P31116775 | chr17:27639850-27639894                           | NM_001013385:377   | Grm4          | INSIDE                 | 0.872                                                        | 1.946                          | 1504.02            | 2926.97            | 1.697                          | 1096.70            | 1861.37            |
| A_68_P29619757 | chr14:56381299-56381343                           | NM_020490:1056     | Ltb4r2        | INSIDE                 | 0.872                                                        | 0.677                          | 1255.29            | 849.54             | 0.590                          | 1015.33            | 599.05             |
| A_68_P32181858 | chr19:53404585-53404629                           | NM_001008543:-329  | Mxil1         | PROMOTER               | 0.872                                                        | 2.460                          | 4597.46            | 11311.27           | 2.145                          | 3146.55            | 6750.54            |
| A_68_P32143068 | chr19:46379305-46379349                           | NM_019408:-858     | Nfkb2         | PROMOTER               | 0.872                                                        | 0.497                          | 1151.85            | 572.46             | 0.433                          | 953.31             | 413.09             |
| A_68_P20454943 | chr1:95239662-95239706                            | NM_080850:-319     | Pask          | DIVERGENT_PROMOTER     | 0.872                                                        | 0.699                          | 2110.67            | 1475.09            | 0.609                          | 1597.99            | 973.57             |
| A_68_P27796193 | chr11:51671506-51671550                           | NM_199299:-545     | Phf15         | PROMOTER               | 0.872                                                        | 1.654                          | 4153.28            | 6869.35            | 1.443                          | 3366.99            | 4858.72            |
| A_68_P30447284 | chr15:93333655-93333701                           | NM_001033217:92644 | Prickle1      | INSIDE                 | 0.872                                                        | 2.194                          | 1071.72            | 2351.23            | 1.914                          | 890.92             | 1704.81            |
| A_68_P24155045 | chr5:143874478-143874522                          | NM_080561:199      | Rnf216        | INSIDE                 | 0.872                                                        | 1.614                          | 1402.68            | 2264.03            | 1.408                          | 1365.53            | 1923.04            |
| A_68_P25086971 | chr7:51608782-51608826                            | NM_001034115:43171 | Shank1        | INSIDE                 | 0.872                                                        | 1.675                          | 1856.04            | 3109.02            | 1.461                          | 1463.80            | 2138.35            |
| A_68_P31349750 | chr17:74396973-74397017                           | NM_053188:262      | Srd5a2        | INSIDE                 | 0.872                                                        | 0.443                          | 1808.29            | 800.22             | 0.386                          | 1424.46            | 549.98             |
| A_68_P22889660 | chr4:46626863-46626907                            | NM_198664:36187    | Tbc1d2        | INSIDE                 | 0.872                                                        | 3.262                          | 795.20             | 2593.92            | 2.845                          | 690.76             | 1965.00            |
| A_68_P27288944 | chr10:80795734-80795778                           | NM_009325:4281     | Tbxa2r        | INSIDE                 | 0.872                                                        | 2.451                          | 3048.99            | 7472.80            | 2.137                          | 2148.70            | 4591.81            |
| A_68_P20066645 | chr1:19204117-19204161                            | NM_001025305:2004  | Tcfap2b       | INSIDE                 | 0.872                                                        | 2.066                          | 3565.75            | 7367.77            | 1.801                          | 2815.05            | 5069.63            |
| A_68_P20620974 | chr1:134257507-134257551                          | NM_178874:30330    | Tmcc2         | INSIDE                 | 0.872                                                        | 5.327                          | 1974.48            | 10518.96           | 4.646                          | 1297.05            | 6026.06            |
| A_68_P29455105 | chr14:22650386-22650430                           | NM_011695:-374     | Vdac2         | PROMOTER               | 0.872                                                        | 2.870                          | 2625.64            | 7534.59            | 2.504                          | 2167.00            | 5425.31            |
| A_68_P25003662 | chr7:24919226-24919270                            | NM_019941:67       | Zfp235        | INSIDE                 | 0.872                                                        | 0.651                          | 1428.14            | 930.36             | 0.568                          | 1281.49            | 727.82             |
| A_68_P27268625 | chr10:76978607-76978651                           | NM_133998:-70      | 1810008A18Rik | PROMOTER               | 0.871                                                        | 0.632                          | 870.27             | 550.25             | 0.551                          | 736.48             | 405.68             |
| A_68_P24153993 | chr5:143667831-143667875                          | NM_007393:551      | Actb          | INSIDE                 | 0.871                                                        | 0.429                          | 3209.67            | 1378.50            | 0.374                          | 2907.59            | 1087.34            |
| A_68_P21866711 | chr2:172765860-172765904                          | NM_007557:-88      | Bmp7          | PROMOTER               | 0.871                                                        | 1.565                          | 2928.19            | 4583.07            | 1.364                          | 2096.07            | 2858.44            |
| A_68_P26445781 | chr9:40686287-40686331                            | NM_178245:4099     | Bsx           | DOWNSTREAM             | 0.871                                                        | 0.413                          | 1713.08            | 706.96             | 0.360                          | 1469.31            | 528.30             |
| A_68_P31933967 | chr19:6320701-6320745                             | NM_001033342:14266 | Cdc42bpg      | INSIDE                 | 0.871                                                        | 1.835                          | 720.74             | 1322.88            | 1.598                          | 573.85             | 917.16             |
| A_68_P23363270 | chr4:140865058-140865102                          | NM_010139:7926     | Epha2         | INSIDE                 | 0.871                                                        | 3.984                          | 1655.48            | 6595.09            | 3.471                          | 1201.84            | 4171.69            |
| A_68_P29287623 | chr13:104710322-104710366                         | NM_001005868:250   | Erbp2ip       | INSIDE                 | 0.871                                                        | 0.677                          | 1248.07            | 845.51             | 0.590                          | 1128.33            | 665.73             |
| A_68_P20897124 | chr1:186551680-186551724                          | NM_008250:4670     | Hlx           | INSIDE                 | 0.871                                                        | 0.606                          | 1000.50            | 606.02             | 0.527                          | 837.16             | 441.43             |
| A_68_P29138729 | chr13:73409301-73409345                           | NM_018885:11378    | Irx4          | DOWNSTREAM             | 0.871                                                        | 0.585                          | 1699.06            | 994.40             | 0.510                          | 1628.36            | 829.90             |
| A_68_P20025041 | chr1:9957764-9957808                              | NM_145692:41415    | Lrrc67        | DOWNSTREAM             | 0.871                                                        | 0.609                          | 2970.43            | 1809.75            | 0.531                          | 2503.54            | 1328.63            |
| A_68_P30370810 | chr15:80042202-80042246                           | NM_010795:38074    | Mgat3         | INSIDE                 | 0.871                                                        | 2.058                          | 719.66             | 1480.88            | 1.791                          | 530.71             | 950.66             |
| A_68_P24053561 | chr5:123479352-123479396                          | NM_175423:14292    | Orai1         | INSIDE                 | 0.871                                                        | 1.968                          | 581.61             | 1144.85            | 1.715                          | 445.50             | 764.19             |
| A_68_P24176179 | chr5:148674196-148674240                          | NM_025624:2015     | Pomp          | INSIDE                 | 0.871                                                        | 2.050                          | 1275.08            | 2613.68            | 1.786                          | 907.28             | 1620.27            |
| A_68_P24991726 | chr7:19735138-19735182                            | NM_026943:-26      | Snrpd2        | DIVERGENT_PROMOTER     | 0.871                                                        | 0.725                          | 3973.23            | 2880.75            | 0.632                          | 2969.44            | 1876.17            |
| A_68_P29030714 | chr13:51196855-51196899                           | NM_146043:610      | Spin1         | INSIDE                 | 0.871                                                        | 0.525                          | 1982.85            | 1041.34            | 0.457                          | 1672.65            | 765.19             |
| A_68_P27540232 | chr10:127669379-127669423                         | NM_011589:-5721    | Timeless      | PROMOTER               | 0.871                                                        | 3.062                          | 436.90             | 1337.93            | 2.667                          | 404.36             | 1078.51            |
| A_68_P22200383 | chr3:65331975-65332019                            | NM_178892:-372     | Tiparp        | PROMOTER               | 0.871                                                        | 0.627                          | 923.82             | 578.98             | 0.546                          | 882.28             | 481.56             |
| A_68_P24076592 | chr5:127723010-127723054                          | NM_175432:837      | Tmem132c      | INSIDE                 | 0.871                                                        | 0.387                          | 1582.26            | 611.72             | 0.337                          | 1427.04            | 480.36             |
| A_68_P23610768 | chr5:37358352-37358396                            | NM_011716:21847    | Wfs1          | INSIDE                 | 0.871                                                        | 1.656                          | 1316.95            | 2180.30            | 1.442                          | 949.83             | 1370.11            |
| A_68_P25008233 | chr7:25862458-25862502                            | NM_175477:216      | Zfp574        | INSIDE                 | 0.871                                                        | 0.392                          | 1481.03            | 580.40             | 0.341                          | 1130.08            | 385.78             |
| A_68_P25505624 | chr7:134588136-134588180                          | NM_175163:4514     | Zfp689        | INSIDE                 | 0.871                                                        | 2.485                          | 1382.72            | 3435.98            | 2.165                          | 1050.76            | 2274.70            |
| A_68_P32554229 | chrX:96412142-96412186                            |                    | Unknown       |                        | 0.871                                                        | 2.003                          | 774.08             | 1550.49            | 1.744                          | 446.97             | 779.67             |
| A_68_P30575402 | chr16:17734359-17734403                           |                    | Unknown       |                        | 0.871                                                        | 2.173                          | 417.98             | 908.32             | 1.893                          | 407.78             | 771.86             |
| A_68_P24015106 | chr5:116894713-116894757                          | NR_015595:6004     | 2410137F16Rik | INSIDE                 | 0.870                                                        | 1.855                          | 751.77             | 1394.82            | 1.615                          | 588.51             | 950.44             |
| A_68_P20872229 | chr1:181734124-181734173                          | NM_026375:-2       | Ahetf1        | PROMOTER               | 0.870                                                        | 0.632                          | 969.51             | 612.75             | 0.550                          | 722.46             | 397.46             |
| A_68_P27383825 | chr10:98377784-98377828                           | NM_026482:21       | Atp2b1        | INSIDE                 | 0.870                                                        | 2.508                          | 706.86             | 1772.64            | 2.183                          | 598.46             | 1306.38            |
| A_68_P25374661 | chr7:108812468-108812512                          | NM_009191:209      | C1pb          | INSIDE                 | 0.870                                                        | 0.567                          | 1128.62            | 639.93             | 0.493                          | 963.78             | 475.32             |



| ProbeName      | Target position of probe on CpG island microarray | TargetID               | GeneSymbol    | CpG island Description | Ratio of relative methylation (TiO <sub>2</sub> -NP/Vehicle) | Sham group                     |                    |                    | TiO <sub>2</sub> -H group      |                    |                    |
|----------------|---------------------------------------------------|------------------------|---------------|------------------------|--------------------------------------------------------------|--------------------------------|--------------------|--------------------|--------------------------------|--------------------|--------------------|
|                |                                                   |                        |               |                        |                                                              | Relative methylation (Cy5/Cy3) | Cy3 signal (Input) | Cy5 signal (MeDIP) | Relative methylation (Cy5/Cy3) | Cy3 signal (Input) | Cy5 signal (MeDIP) |
| A_68_P27479308 | chr10:116511163-116511209                         | NM_177798:74344        | Frs2          | INSIDE                 | 0.870                                                        | 1.872                          | 641.53             | 1201.21            | 1.629                          | 554.31             | 902.71             |
| A_68_P25724985 | chr8:26149132-26149176                            | NM_001081187:280       | Htra4         | INSIDE                 | 0.870                                                        | 2.906                          | 777.34             | 2258.56            | 2.528                          | 736.51             | 1862.15            |
| A_68_P27987931 | chr11:86070791-86070835                           | NM_027421:258          | Ints2         | INSIDE                 | 0.870                                                        | 0.667                          | 1556.45            | 1037.85            | 0.580                          | 1345.03            | 780.48             |
| A_68_P30366728 | chr15:79316188-79316232                           | NM_008427:19461        | Kenj4         | INSIDE                 | 0.870                                                        | 2.719                          | 1525.52            | 4148.39            | 2.366                          | 1088.64            | 2575.47            |
| A_68_P29865207 | chr14:103745609-103745653                         | NM_207215:387          | Mycbp2        | INSIDE                 | 0.870                                                        | 0.620                          | 2462.07            | 1527.23            | 0.540                          | 2071.53            | 1117.82            |
| A_68_P27897405 | chr11:69647501-69647545                           | NM_198862:829          | Nlgn2         | INSIDE                 | 0.870                                                        | 1.934                          | 703.79             | 1361.32            | 1.682                          | 582.86             | 980.53             |
| A_68_P22325408 | chr3:90269752-90269796                            | NM_008727:14           | Npr1          | INSIDE                 | 0.870                                                        | 0.602                          | 1107.03            | 666.74             | 0.524                          | 1072.52            | 562.03             |
| A_68_P27614818 | chr11:17111314-17111358                           | NM_025443:256          | Pno1          | INSIDE                 | 0.870                                                        | 0.709                          | 2298.36            | 1628.53            | 0.616                          | 1845.26            | 1136.89            |
| A_68_P24795626 | chr6:119852843-119852887                          | NM_001166383:149       | Rad52         | INSIDE                 | 0.870                                                        | 0.686                          | 1194.88            | 820.04             | 0.597                          | 1143.92            | 683.17             |
| A_68_P25091259 | chr7:52379751-52379795                            | NM_013725:-13          | Rps11         | PROMOTER               | 0.870                                                        | 0.575                          | 1341.90            | 771.36             | 0.500                          | 984.21             | 491.94             |
| A_68_P22488493 | chr3:123211082-123211126                          | NR_028573:-120         | Snora24       | PROMOTER               | 0.870                                                        | 0.626                          | 1027.43            | 642.68             | 0.545                          | 877.38             | 477.74             |
| A_68_P31155256 | chr17:34817442-34817486                           | NM_031176:9985         | Tnxb          | INSIDE                 | 0.870                                                        | 1.717                          | 900.21             | 1545.81            | 1.494                          | 764.78             | 1142.74            |
| A_68_P25614228 | chr8:3496226-3496270                              | NM_080461:3111         | Zfp358        | INSIDE                 | 0.870                                                        | 1.935                          | 571.83             | 1106.36            | 1.683                          | 458.61             | 772.03             |
| A_68_P32975995 | chr12:18394467-18394511                           | ENSMUST00000080502:-72 |               | PROMOTER               | 0.870                                                        | 2.392                          | 608.84             | 1456.18            | 2.081                          | 630.39             | 1312.15            |
| A_68_P28854600 | chr13:18084983-18085027                           | NM_025904:181          | 1600012F09Rik | INSIDE                 | 0.869                                                        | 0.701                          | 1274.65            | 894.08             | 0.609                          | 1057.37            | 644.15             |
| A_68_P27282332 | chr10:79767774-79767818                           | NM_011789:3232         | Ape2          | INSIDE                 | 0.869                                                        | 2.388                          | 3656.87            | 8733.89            | 2.076                          | 2699.25            | 5604.91            |
| A_68_P28046785 | chr11:96650631-96650675                           | NM_007622:203          | Cbx1          | INSIDE                 | 0.869                                                        | 0.494                          | 1413.61            | 698.11             | 0.429                          | 1106.79            | 474.91             |
| A_68_P21708093 | chr2:144425785-144425829                          | NM_025314:118          | Dtd1          | INSIDE                 | 0.869                                                        | 0.681                          | 1069.50            | 727.94             | 0.591                          | 925.92             | 547.53             |
| A_68_P31424357 | chr17:88039524-88039571                           | NM_008532:4229         | Epeam         | INSIDE                 | 0.869                                                        | 2.625                          | 372.84             | 978.86             | 2.281                          | 387.07             | 883.04             |
| A_68_P26421276 | chr9:35018562-35018606                            | NM_172291:-74          | Foxred1       | DIVERGENT_PROMOTER     | 0.869                                                        | 0.437                          | 1548.43            | 676.67             | 0.380                          | 1250.58            | 475.02             |
| A_68_P21753005 | chr2:152934198-152934242                          | NM_001172117:17        | Hek           | INSIDE                 | 0.869                                                        | 0.599                          | 914.05             | 547.48             | 0.520                          | 830.11             | 432.03             |
| A_68_P21722291 | chr2:146910728-146910772                          | NM_023504:331          | Nkx2-4        | INSIDE                 | 0.869                                                        | 2.664                          | 751.97             | 2003.09            | 2.314                          | 707.09             | 1635.90            |
| A_68_P30542115 | chr16:10411996-10412040                           | NM_011955:-12          | Nubp1         | PROMOTER               | 0.869                                                        | 0.668                          | 944.17             | 631.01             | 0.581                          | 860.32             | 499.49             |
| A_68_P21089695 | chr2:28061711-28061755                            | NM_001038612:524       | Olfm1         | INSIDE                 | 0.869                                                        | 1.627                          | 1541.35            | 2507.71            | 1.415                          | 1384.94            | 1959.01            |
| A_68_P21870540 | chr2:173411809-173411854                          | NR_027957:73209        | Ppp4r1-ps     | INSIDE                 | 0.869                                                        | 2.777                          | 309.12             | 858.50             | 2.414                          | 214.41             | 517.69             |
| A_68_P31735661 | chr18:57522721-57522765                           | NM_028447:8356         | Prrc1         | INSIDE                 | 0.869                                                        | 2.775                          | 1221.69            | 3390.28            | 2.413                          | 805.85             | 1944.21            |
| A_68_P27898299 | chr11:69795072-69795116                           | NM_018740:-357         | Rai12         | PROMOTER               | 0.869                                                        | 0.483                          | 1406.71            | 679.02             | 0.420                          | 1215.32            | 509.86             |
| A_68_P24939590 | chr6:148303285-148303329                          | NR_003634:129          | Rps4y2        | PROMOTER               | 0.869                                                        | 1.918                          | 1410.21            | 2704.71            | 1.666                          | 1243.03            | 2070.60            |
| A_68_P26569718 | chr9:62129773-62129817                            | NM_025721:192          | Spesp1        | INSIDE                 | 0.869                                                        | 2.798                          | 575.89             | 1611.10            | 2.430                          | 502.60             | 1221.21            |
| A_68_P30506930 | chr16:3872290-3872334                             | NM_001033159:62        | Zfp597        | INSIDE                 | 0.869                                                        | 2.310                          | 5535.65            | 12789.94           | 2.008                          | 4065.17            | 8162.34            |
| A_68_P26640510 | chr9:74697051-74697095                            | ENSMUST00000160842:271 |               | INSIDE                 | 0.869                                                        | 1.670                          | 1508.71            | 2518.81            | 1.451                          | 1391.82            | 2019.66            |
| A_68_P20146384 | chr1:36160417-36160461                            | NM_015818:35194        | Hs6st1        | INSIDE                 | 0.868                                                        | 1.963                          | 978.06             | 1920.18            | 1.704                          | 850.90             | 1449.85            |
| A_68_P21812072 | chr2:163201808-163201852                          | NM_021566:21879        | Jph2          | INSIDE                 | 0.868                                                        | 2.466                          | 744.13             | 1835.07            | 2.140                          | 751.71             | 1608.81            |
| A_68_P21078908 | chr2:26321156-26321200                            | NM_008714:38164        | Notch1        | INSIDE                 | 0.868                                                        | 1.835                          | 1854.93            | 3403.59            | 1.592                          | 1521.03            | 2421.85            |
| A_68_P27209838 | chr10:66558947-66558991                           | NM_001204915:768       | Reep3         | INSIDE                 | 0.868                                                        | 0.655                          | 1130.56            | 740.18             | 0.569                          | 906.29             | 515.27             |
| A_68_P24085132 | chr5:129288040-129288085                          | NM_001081388:171175    | Rimbp2        | INSIDE                 | 0.868                                                        | 2.478                          | 919.33             | 2278.16            | 2.150                          | 759.17             | 1632.17            |
| A_68_P30642390 | chr16:30550650-30550694                           | NM_172614:-8           | Tmem44        | PROMOTER               | 0.868                                                        | 5.105                          | 435.99             | 2225.66            | 4.433                          | 505.33             | 2240.22            |
| A_68_P25029338 | chr7:30768885-30768929                            | NM_001033355:-67       | Zfp568        | PROMOTER               | 0.868                                                        | 1.929                          | 615.79             | 1187.88            | 1.674                          | 555.88             | 930.78             |
| A_68_P22061573 | chr3:36962572-36962616                            | NM_009350:17           | Adad1         | INSIDE                 | 0.867                                                        | 2.272                          | 469.16             | 1066.08            | 1.971                          | 460.17             | 906.95             |
| A_68_P27334199 | chr10:89512717-89512765                           | NM_001128086:176487    | Anks1b        | INSIDE                 | 0.867                                                        | 2.633                          | 2012.36            | 5298.50            | 2.284                          | 1533.30            | 3501.44            |
| A_68_P26569974 | chr9:62191922-62191966                            | NM_009672:2795         | Anp32a        | INSIDE                 | 0.867                                                        | 1.922                          | 1060.27            | 2037.41            | 1.666                          | 813.61             | 1355.70            |
| A_68_P25601077 | chr7:150645470-150645514                          | NM_001161624:1463      | Cdkn1c        | INSIDE                 | 0.867                                                        | 2.175                          | 346.17             | 752.85             | 1.886                          | 327.91             | 618.38             |
| A_68_P24631555 | chr6:90259775-90259819                            | NM_027928:15383        | Chst13        | INSIDE                 | 0.867                                                        | 2.598                          | 454.40             | 1180.42            | 2.252                          | 499.07             | 1123.66            |
| A_68_P26141977 | chr8:109417130-109417174                          | NM_145412:341          | Chtf8         | INSIDE                 | 0.867                                                        | 1.566                          | 4050.16            | 6344.42            | 1.357                          | 3176.69            | 4312.33            |
| A_68_P26813992 | chr9:108165850-108165894                          | NM_010017:195          | Dag1          | INSIDE                 | 0.867                                                        | 4.360                          | 4840.93            | 21107.51           | 3.782                          | 3687.16            | 13944.75           |
| A_68_P28431897 | chr12:52930027-52930071                           | NM_144788:475          | Hectd1        | INSIDE                 | 0.867                                                        | 0.586                          | 2107.41            | 1235.91            | 0.509                          | 1887.39            | 959.89             |
| A_68_P23088446 | chr4:87678217-87678261                            | NM_027326:1073         | Mllt3         | INSIDE                 | 0.867                                                        | 1.911                          | 9013.93            | 17224.68           | 1.656                          | 5695.10            | 9432.97            |
| A_68_P28621836 | chr12:90498827-90498871                           | NM_172544:307015       | Nrxn3         | INSIDE                 | 0.867                                                        | 2.348                          | 1035.06            | 2430.21            | 2.035                          | 841.98             | 1713.61            |
| A_68_P30397622 | chr15:84754271-84754315                           | NM_016714:435          | Nup50         | INSIDE                 | 0.867                                                        | 0.701                          | 1818.50            | 1275.42            | 0.608                          | 1451.79            | 883.20             |
| A_68_P27553886 | chr11:3661741-3661785                             | NM_152818:102144       | Osbp2         | INSIDE                 | 0.867                                                        | 0.611                          | 973.22             | 594.88             | 0.530                          | 773.97             | 410.38             |
| A_68_P31951137 | chr19:10599680-10599724                           | NM_025333:-3           | Sdhaf2        | DIVERGENT_PROMOTER     | 0.867                                                        | 0.595                          | 2108.23            | 1255.39            | 0.516                          | 1676.01            | 865.31             |

| ProbeName      | Target position of probe on CpG island microarray | TargetID                | GeneSymbol    | CpG island Description | Ratio of relative methylation (TiO <sub>2</sub> -NP/Vehicle) | Sham group                     |                    |                    | TiO <sub>2</sub> -H group      |                    |                    |
|----------------|---------------------------------------------------|-------------------------|---------------|------------------------|--------------------------------------------------------------|--------------------------------|--------------------|--------------------|--------------------------------|--------------------|--------------------|
|                |                                                   |                         |               |                        |                                                              | Relative methylation (Cy5/Cy3) | Cy3 signal (Input) | Cy5 signal (MeDIP) | Relative methylation (Cy5/Cy3) | Cy3 signal (Input) | Cy5 signal (MeDIP) |
| A_68_P31197209 | chr17:44913929-44913973                           | NM_178652:-169          | Supt3h        | PROMOTER               | 0.867                                                        | 0.694                          | 1209.12            | 838.88             | 0.602                          | 1110.31            | 667.90             |
| A_68_P25264700 | chr7:87226640-87226684                            | NM_175433:55549         | Zfp710        | INSIDE                 | 0.867                                                        | 5.599                          | 2146.15            | 12015.37           | 4.854                          | 1439.13            | 6985.40            |
| A_68_P21041402 | chr2:18688499-18688543                            | ENSMUST00000119424:7910 |               | DOWNSTREAM             | 0.867                                                        | 0.662                          | 1346.87            | 891.74             | 0.574                          | 911.08             | 523.20             |
| A_68_P30280956 | chr15:64144021-64144065                           | NM_010026:70439         | Asap1         | INSIDE                 | 0.866                                                        | 0.518                          | 1540.98            | 798.96             | 0.449                          | 1183.54            | 531.62             |
| A_68_P31155037 | chr17:34784214-34784258                           | NM_017406:112           | Atf6b         | INSIDE                 | 0.866                                                        | 0.636                          | 1437.71            | 914.68             | 0.551                          | 1213.68            | 668.46             |
| A_68_P27566548 | chr11:5966021-5966065                             | NM_001174053:-291       | Camk2b        | PROMOTER               | 0.866                                                        | 0.565                          | 1963.07            | 1108.52            | 0.489                          | 1621.10            | 792.99             |
| A_68_P24011288 | chr5:116182625-116182669                          | NM_001080808:-1078      | Ccdc64        | PROMOTER               | 0.866                                                        | 0.458                          | 2056.27            | 941.30             | 0.396                          | 1749.99            | 693.52             |
| A_68_P32467106 | chrX:71500485-71500529                            | NM_007927:329           | Emd           | INSIDE                 | 0.866                                                        | 2.166                          | 688.32             | 1491.24            | 1.875                          | 524.65             | 983.86             |
| A_68_P23323334 | chr4:134090623-134090667                          | NM_029759:-1977         | Fam54b        | PROMOTER               | 0.866                                                        | 4.102                          | 229.87             | 942.85             | 3.552                          | 284.84             | 1011.86            |
| A_68_P23792662 | chr5:72978528-72978572                            | NM_001024147:239        | Gm5868        | INSIDE                 | 0.866                                                        | 1.574                          | 4410.48            | 6944.21            | 1.363                          | 3337.78            | 4550.13            |
| A_68_P32040189 | chr19:27397675-27397720                           | NM_183179:589           | Kenv2         | INSIDE                 | 0.866                                                        | 2.631                          | 288.53             | 759.26             | 2.279                          | 222.11             | 506.17             |
| A_68_P27897481 | chr11:69659900-69659944                           | NM_023564:-196          | Plscr3        | PROMOTER               | 0.866                                                        | 0.429                          | 2485.48            | 1066.58            | 0.372                          | 1987.56            | 738.94             |
| A_68_P28671531 | chr12:99927688-99927737                           | NM_011877:45143         | Ptpn21        | INSIDE                 | 0.866                                                        | 2.361                          | 1448.94            | 3420.54            | 2.044                          | 1165.78            | 2382.44            |
| A_68_P31862860 | chr18:80389507-80389558                           | NM_199197:7826          | Rbfa          | INSIDE                 | 0.866                                                        | 3.521                          | 778.32             | 2740.13            | 3.050                          | 657.44             | 2005.38            |
| A_68_P29434939 | chr14:18492981-18493025                           | NM_001113417:-471       | Thrb          | PROMOTER               | 0.866                                                        | 2.355                          | 1553.79            | 3658.48            | 2.039                          | 1308.39            | 2667.18            |
| A_68_P31403195 | chr17:84586228-84586272                           | NM_001001806:1037       | Zfp3612       | INSIDE                 | 0.866                                                        | 2.433                          | 509.64             | 1239.84            | 2.107                          | 482.28             | 1016.21            |
| A_68_P32126393 | chr19:43502105-43502149                           |                         |               | Unknown                | 0.866                                                        | 3.073                          | 586.60             | 1802.37            | 2.662                          | 528.52             | 1406.92            |
| A_68_P31305847 | chr17:66728898-66728942                           | NM_001114098:70170      | 1110012J17Rik | INSIDE                 | 0.865                                                        | 2.267                          | 1452.35            | 3291.76            | 1.960                          | 1052.98            | 2064.32            |
| A_68_P23315717 | chr4:132641057-132641101                          | NM_146155:73658         | Ahde1         | DOWNSTREAM             | 0.865                                                        | 0.611                          | 1018.31            | 621.88             | 0.528                          | 885.12             | 467.45             |
| A_68_P24460753 | chr6:53989704-53989748                            | NM_001163640:-199       | Chn2          | PROMOTER               | 0.865                                                        | 0.558                          | 1024.92            | 572.28             | 0.483                          | 865.45             | 417.93             |
| A_68_P28038132 | chr11:95198164-95198208                           | NM_172543:-145          | Fam117a       | PROMOTER               | 0.865                                                        | 0.656                          | 891.88             | 585.28             | 0.567                          | 769.31             | 436.55             |
| A_68_P26227387 | chr8:124078337-124078381                          | NM_133765:24348         | Fbxo31        | INSIDE                 | 0.865                                                        | 2.490                          | 548.54             | 1366.02            | 2.153                          | 472.00             | 1016.38            |
| A_68_P24863967 | chr6:134819942-134819986                          | NM_001167697:17913      | Gpr19         | INSIDE                 | 0.865                                                        | 3.536                          | 676.30             | 2391.39            | 3.059                          | 536.40             | 1641.09            |
| A_68_P30363243 | chr15:78758427-78758471                           | NM_008495:1294          | Lgals1        | INSIDE                 | 0.865                                                        | 0.692                          | 1760.21            | 1218.25            | 0.599                          | 1375.37            | 823.36             |
| A_68_P25266277 | chr7:87508028-87508072                            | NM_172903:8211          | Man2a2        | INSIDE                 | 0.865                                                        | 1.912                          | 1932.47            | 3694.81            | 1.654                          | 1330.30            | 2200.65            |
| A_68_P20168276 | chr1:39957440-39957484                            | NM_008696:-295          | Map4k4        | PROMOTER               | 0.865                                                        | 2.016                          | 752.92             | 1518.24            | 1.745                          | 589.78             | 1029.15            |
| A_68_P21731906 | chr2:148558116-148558160                          | NM_019632:18            | Napb          | INSIDE                 | 0.865                                                        | 0.573                          | 972.05             | 556.92             | 0.496                          | 804.00             | 398.66             |
| A_68_P29998112 | chr15:8059193-8059237                             | NM_133227:-98           | Nup155        | PROMOTER               | 0.865                                                        | 1.706                          | 3614.97            | 6165.40            | 1.475                          | 2486.84            | 3666.92            |
| A_68_P27137646 | chr10:52137376-52137420                           | NM_030250:46            | Nus1          | INSIDE                 | 0.865                                                        | 2.089                          | 13326.36           | 27839.76           | 1.807                          | 9593.03            | 17333.46           |
| A_68_P27080349 | chr10:39452815-39452859                           | NM_011264:871           | Rev3l         | INSIDE                 | 0.865                                                        | 0.688                          | 2277.62            | 1566.19            | 0.594                          | 1867.17            | 1110.00            |
| A_68_P27034632 | chr10:29081402-29081446                           | NM_001110196:824        | Rnf146        | INSIDE                 | 0.865                                                        | 0.631                          | 993.92             | 626.90             | 0.545                          | 766.87             | 418.15             |
| A_68_P20233541 | chr1:53841640-53841684                            | NM_133810:397           | Stk17b        | INSIDE                 | 0.865                                                        | 0.730                          | 2383.44            | 1739.64            | 0.632                          | 1961.17            | 1238.69            |
| A_68_P23974101 | chr5:109204043-109204087                          | NM_026109:20318         | Tmed11        | DOWNSTREAM             | 0.865                                                        | 1.652                          | 1295.03            | 2139.48            | 1.429                          | 1013.24            | 1448.21            |
| A_68_P27285909 | chr10:80318182-80318226                           | NM_175195:185           | 3110056O03Rik | INSIDE                 | 0.864                                                        | 0.673                          | 1710.84            | 1151.81            | 0.582                          | 1581.99            | 919.98             |
| A_68_P23320878 | chr4:133628753-133628797                          | NM_001162970:4408       | Aim11         | INSIDE                 | 0.864                                                        | 2.216                          | 583.81             | 1293.70            | 1.915                          | 433.60             | 830.45             |
| A_68_P22384844 | chr3:102975721-102975767                          | NM_026602:111           | Beas2         | INSIDE                 | 0.864                                                        | 2.678                          | 1801.70            | 4825.71            | 2.314                          | 1251.85            | 2897.17            |
| A_68_P21646235 | chr2:133380368-133380412                          | NM_007553:1456          | Bmp2          | INSIDE                 | 0.864                                                        | 0.583                          | 977.78             | 570.09             | 0.504                          | 846.56             | 426.65             |
| A_68_P28752828 | chr12:114067098-114067142                         | NM_028023:480           | Cdca4         | INSIDE                 | 0.864                                                        | 0.482                          | 1426.83            | 687.84             | 0.416                          | 1138.69            | 474.11             |
| A_68_P27091225 | chr10:41529755-41529799                           | NM_026643:-340          | Cep57l1       | DIVERGENT_PROMOTER     | 0.864                                                        | 0.600                          | 1175.86            | 705.05             | 0.518                          | 947.80             | 491.12             |
| A_68_P28727387 | chr12:109572709-109572753                         | NM_010010:140           | Cyp46a1       | INSIDE                 | 0.864                                                        | 0.563                          | 1057.15            | 595.44             | 0.487                          | 838.21             | 407.83             |
| A_68_P27288015 | chr10:80655147-80655191                           | NM_007828:8506          | Dapk3         | INSIDE                 | 0.864                                                        | 2.019                          | 530.06             | 1070.21            | 1.744                          | 459.21             | 800.82             |
| A_68_P27010233 | chr10:24431686-24431730                           | NM_008813:200           | Enpp1         | INSIDE                 | 0.864                                                        | 0.582                          | 898.67             | 523.34             | 0.503                          | 737.01             | 370.83             |
| A_68_P23979399 | chr5:110816208-110816252                          | NM_028596:-84           | Fbrs11        | PROMOTER               | 0.864                                                        | 0.474                          | 2198.19            | 1042.00            | 0.409                          | 2037.86            | 834.46             |
| A_68_P25360746 | chr7:106416588-106416632                          | NM_001043355:-245       | Mtap6         | PROMOTER               | 0.864                                                        | 0.403                          | 1499.45            | 603.65             | 0.348                          | 1209.16            | 420.36             |
| A_68_P29585968 | chr14:48741266-48741310                           | NM_033602:745           | Peli2         | INSIDE                 | 0.864                                                        | 0.511                          | 1200.44            | 613.88             | 0.442                          | 970.72             | 428.93             |
| A_68_P25957707 | chr8:74119888-74119932                            | NM_025396:3828          | Pgls          | INSIDE                 | 0.864                                                        | 0.534                          | 1028.05            | 548.84             | 0.461                          | 842.82             | 388.84             |
| A_68_P27278630 | chr10:79202255-79202299                           | NM_172551:7050          | Polrmt        | INSIDE                 | 0.864                                                        | 2.175                          | 1523.33            | 3313.29            | 1.880                          | 1322.72            | 2486.57            |
| A_68_P29094163 | chr13:63665381-63665425                           | NM_008957:1426          | Ptch1         | INSIDE                 | 0.864                                                        | 3.866                          | 2665.74            | 10306.10           | 3.342                          | 2275.36            | 7604.04            |
| A_68_P21843351 | chr2:168581527-168581571                          | NM_175303:11153         | Sall4         | INSIDE                 | 0.864                                                        | 2.183                          | 1411.67            | 3082.28            | 1.887                          | 1177.17            | 2221.12            |
| A_68_P31254021 | chr17:56263845-56263889                           | NM_013662:9409          | Sema6b        | INSIDE                 | 0.864                                                        | 1.765                          | 3571.74            | 6303.56            | 1.526                          | 2749.03            | 4193.97            |
| A_68_P29033146 | chr13:51662912-51662956                           | NM_009167:-481          | Shc3          | PROMOTER               | 0.864                                                        | 0.604                          | 1315.45            | 794.00             | 0.521                          | 1143.06            | 596.03             |

| ProbeName      | Target position of probe on CpG island microarray | TargetID           | GeneSymbol    | CpG island Description | Ratio of relative methylation (TiO <sub>2</sub> -NP/Vehicle) | Sham group                     |                    |                    | TiO <sub>2</sub> -H group      |                    |                    |
|----------------|---------------------------------------------------|--------------------|---------------|------------------------|--------------------------------------------------------------|--------------------------------|--------------------|--------------------|--------------------------------|--------------------|--------------------|
|                |                                                   |                    |               |                        |                                                              | Relative methylation (Cy5/Cy3) | Cy3 signal (Input) | Cy5 signal (MeDIP) | Relative methylation (Cy5/Cy3) | Cy3 signal (Input) | Cy5 signal (MeDIP) |
| A_68_P30365306 | chr15:79082860-79082904                           | NM_020516:2296     | Slc16a8       | INSIDE                 | 0.864                                                        | 0.674                          | 3452.16            | 2328.32            | 0.583                          | 2664.63            | 1552.29            |
| A_68_P25615132 | chr8:3679365-3679411                              | NM_025701:2912     | Trappc5       | INSIDE                 | 0.864                                                        | 2.767                          | 2312.31            | 6398.75            | 2.391                          | 1616.14            | 3864.83            |
| A_68_P33005881 | A_68_P33005881                                    |                    | Unknown       |                        | 0.864                                                        | 5.045                          | 224.46             | 1132.42            | 4.361                          | 240.95             | 1050.77            |
| A_68_P24059257 | chr5:124539964-124540008                          | NM_019875:5821     | Abcb9         | INSIDE                 | 0.863                                                        | 2.442                          | 1177.91            | 2876.12            | 2.107                          | 1098.29            | 2313.69            |
| A_68_P32537858 | chrX:91457905-91457949                            | NM_012010:64       | Eif2s3x       | INSIDE                 | 0.863                                                        | 0.482                          | 1417.76            | 682.90             | 0.416                          | 677.42             | 281.73             |
| A_68_P29616395 | chr14:55732380-55732424                           | NM_177049:3370     | Jph4          | INSIDE                 | 0.863                                                        | 2.378                          | 761.34             | 1810.68            | 2.053                          | 727.62             | 1493.48            |
| A_68_P32140679 | chr19:45890150-45890194                           | NM_030716:121      | Kenip2        | INSIDE                 | 0.863                                                        | 0.660                          | 1257.68            | 829.55             | 0.569                          | 1000.64            | 569.67             |
| A_68_P28748396 | chr12:113414015-113414059                         | NM_001097621:29618 | Kif26a        | INSIDE                 | 0.863                                                        | 2.982                          | 738.34             | 2201.80            | 2.573                          | 630.81             | 1622.77            |
| A_68_P23239265 | chr4:117933690-117933734                          | NM_011213:30290    | Ptprf         | INSIDE                 | 0.863                                                        | 0.676                          | 1220.85            | 825.76             | 0.584                          | 1055.65            | 616.17             |
| A_68_P29152216 | chr13:76081085-76081129                           | NM_028493:166      | Rhobtb3       | INSIDE                 | 0.863                                                        | 3.071                          | 393.94             | 1209.74            | 2.649                          | 372.43             | 986.72             |
| A_68_P27550645 | chr11:3093025-3093069                             | NM_030207:420      | Sfi1          | INSIDE                 | 0.863                                                        | 2.657                          | 3840.67            | 10202.87           | 2.292                          | 3585.25            | 8218.46            |
| A_68_P30486391 | chr15:100382046-100382090                         | NM_033476:310      | Tefcp2        | INSIDE                 | 0.863                                                        | 0.622                          | 839.69             | 522.17             | 0.536                          | 645.18             | 346.06             |
| A_68_P31117188 | chr17:27702491-27702536                           | NM_001002895:159   | Alf413582     | INSIDE                 | 0.862                                                        | 0.669                          | 2941.84            | 1966.87            | 0.576                          | 2225.21            | 1282.22            |
| A_68_P21084957 | chr2:27331585-27331629                            | NM_001113573:-413  | Brd3          | PROMOTER               | 0.862                                                        | 0.535                          | 1220.39            | 652.99             | 0.461                          | 1115.33            | 514.51             |
| A_68_P27263161 | chr10:76086105-76086149                           | NM_146007:23       | Col6a2        | INSIDE                 | 0.862                                                        | 0.675                          | 1095.32            | 739.87             | 0.582                          | 956.65             | 557.12             |
| A_68_P21147280 | chr12:38142625-38142669                           | NM_146122:258      | Dennd1a       | INSIDE                 | 0.862                                                        | 0.600                          | 1210.04            | 726.29             | 0.517                          | 1055.70            | 546.27             |
| A_68_P25592835 | chr7:149268541-149268585                          | NM_008748:12627    | Dusp8         | INSIDE                 | 0.862                                                        | 2.225                          | 686.48             | 1527.55            | 1.918                          | 583.18             | 1118.37            |
| A_68_P29702363 | chr14:70999406-70999450                           | NM_194345:214      | Fam160b2      | INSIDE                 | 0.862                                                        | 0.582                          | 1373.34            | 799.81             | 0.502                          | 1073.83            | 538.91             |
| A_68_P31166958 | chr17:37183624-37183668                           | NM_019439:736      | Gabrr1        | INSIDE                 | 0.862                                                        | 2.582                          | 10540.70           | 27217.56           | 2.225                          | 8596.64            | 19130.09           |
| A_68_P25954497 | chr8:73376700-73376744                            | NM_032397:4185     | Kenn1         | INSIDE                 | 0.862                                                        | 2.851                          | 844.45             | 2407.94            | 2.457                          | 691.33             | 1698.61            |
| A_68_P25965605 | chr8:75876686-75876730                            | NM_010687:-253     | Large         | PROMOTER               | 0.862                                                        | 1.822                          | 715.09             | 1302.66            | 1.571                          | 605.54             | 951.04             |
| A_68_P27553118 | chr11:3549344-3549388                             | NM_001159288:-130  | More2a        | DIVERGENT_PROMOTER     | 0.862                                                        | 0.675                          | 1298.75            | 876.60             | 0.582                          | 1111.55            | 646.43             |
| A_68_P28535274 | chr12:74147686-74147730                           | NM_009189:-9       | Six1          | PROMOTER               | 0.862                                                        | 0.564                          | 967.81             | 545.74             | 0.486                          | 773.62             | 376.19             |
| A_68_P29614998 | chr14:55531700-55531745                           | NM_021551:247      | Slc22a17      | INSIDE                 | 0.862                                                        | 0.478                          | 1541.79            | 737.13             | 0.412                          | 1268.62            | 522.54             |
| A_68_P27926649 | chr11:75344957-75345001                           | NM_001199284:-217  | Slc43a2       | PROMOTER               | 0.862                                                        | 0.677                          | 1204.16            | 815.63             | 0.584                          | 1080.83            | 630.75             |
| A_68_P23974102 | chr5:109204136-109204181                          | NM_026109:20224    | Tmed11        | DOWNSTREAM             | 0.862                                                        | 2.279                          | 1522.98            | 3471.45            | 1.964                          | 1217.50            | 2390.84            |
| A_68_P29734163 | chr14:76904251-76904295                           | NM_009366:-44      | Tsc22d1       | PROMOTER               | 0.862                                                        | 4.053                          | 453.91             | 1839.76            | 3.494                          | 412.43             | 1440.98            |
| A_68_P25422111 | chr7:119166689-119166733                          | NM_133758:-309     | Usp47         | PROMOTER               | 0.862                                                        | 0.616                          | 1440.36            | 887.33             | 0.531                          | 1231.18            | 653.80             |
| A_68_P23618264 | chr5:38611351-38611395                            | NM_029162:295      | Zbtb49        | INSIDE                 | 0.862                                                        | 0.537                          | 1030.61            | 553.08             | 0.463                          | 897.33             | 415.34             |
| A_68_P25505910 | chr7:134655663-134655707                          | NR_024331:699      | 1700008J07rik | INSIDE                 | 0.861                                                        | 0.603                          | 1478.46            | 891.50             | 0.519                          | 1091.06            | 566.18             |
| A_68_P27843665 | chr11:60351464-60351508                           | NM_172943:302      | Alkbh5        | INSIDE                 | 0.861                                                        | 0.585                          | 1060.51            | 620.83             | 0.504                          | 949.99             | 478.84             |
| A_68_P32260350 | chrX:11665796-11665840                            | NM_029510:-8139    | Bcor          | PROMOTER               | 0.861                                                        | 0.664                          | 2642.39            | 1754.42            | 0.571                          | 1099.84            | 628.48             |
| A_68_P20879817 | chr1:183081001-183081045                          | NM_030131:-39      | Cnih4         | DIVERGENT_PROMOTER     | 0.861                                                        | 0.493                          | 1223.51            | 603.35             | 0.425                          | 994.95             | 422.69             |
| A_68_P28252839 | chr12:14156651-14156695                           | NM_029007:2172     | Fam84a        | INSIDE                 | 0.861                                                        | 0.515                          | 1109.64            | 571.95             | 0.444                          | 864.02             | 383.58             |
| A_68_P29257131 | chr13:99125652-99125696                           | NM_008242:1475     | Foxd1         | INSIDE                 | 0.861                                                        | 2.196                          | 509.92             | 1119.72            | 1.890                          | 504.29             | 953.04             |
| A_68_P26346080 | chr9:21037928-21037972                            | NM_001110305:5826  | Keap1         | INSIDE                 | 0.861                                                        | 2.667                          | 1873.44            | 4996.52            | 2.297                          | 1432.17            | 3289.01            |
| A_68_P28457817 | chr12:57714096-57714140                           | NM_008701:153      | Nkx2-9        | INSIDE                 | 0.861                                                        | 0.572                          | 2049.69            | 1173.40            | 0.493                          | 1703.93            | 840.33             |
| A_68_P21330231 | chr2:73052613-73052657                            | NM_025942:-130     | Ola1          | PROMOTER               | 0.861                                                        | 0.495                          | 1184.56            | 586.20             | 0.426                          | 1058.44            | 451.18             |
| A_68_P31626770 | chr18:37181577-37181621                           | NM_138663:1715     | Pcdha12       | INSIDE                 | 0.861                                                        | 2.661                          | 2239.57            | 5959.38            | 2.292                          | 1631.79            | 3739.29            |
| A_68_P23524646 | chr5:20692316-20692360                            | NM_175437:254      | Pion          | INSIDE                 | 0.861                                                        | 0.479                          | 1213.94            | 580.90             | 0.412                          | 1058.15            | 436.01             |
| A_68_P24048831 | chr5:122608072-122608116                          | NM_013636:-193     | Ppp1cc        | PROMOTER               | 0.861                                                        | 2.329                          | 2513.96            | 5854.58            | 2.005                          | 1968.99            | 3948.16            |
| A_68_P27541974 | chr10:127985891-127985935                         | NM_018860:312      | Rpl41         | INSIDE                 | 0.861                                                        | 0.625                          | 1295.97            | 809.64             | 0.538                          | 1060.02            | 570.51             |
| A_68_P31236341 | chr17:51972574-51972618                           | NM_009122:-624     | Satb1         | PROMOTER               | 0.861                                                        | 3.362                          | 5547.79            | 18650.42           | 2.894                          | 3728.12            | 10789.18           |
| A_68_P23608244 | chr5:36873039-36873083                            | NM_001113364:212   | Tbc1d14       | INSIDE                 | 0.861                                                        | 0.570                          | 2108.24            | 1200.69            | 0.491                          | 1502.24            | 736.99             |
| A_68_P28056086 | chr11:98245656-98245700                           | NM_011540:554      | Tcap          | INSIDE                 | 0.861                                                        | 2.341                          | 853.14             | 1997.03            | 2.016                          | 813.78             | 1640.91            |
| A_68_P30499468 | chr15:102567952-102567997                         |                    | Unknown       |                        | 0.861                                                        | 3.069                          | 665.93             | 2043.72            | 2.644                          | 536.00             | 1417.14            |
| A_68_P24059258 | chr5:124540048-124540092                          | NM_019875:5737     | Abcb9         | INSIDE                 | 0.860                                                        | 2.457                          | 1068.28            | 2624.29            | 2.114                          | 836.79             | 1768.74            |
| A_68_P31150484 | chr17:33918191-33918235                           | NM_020581:308      | Angptl4       | INSIDE                 | 0.860                                                        | 2.064                          | 494.04             | 1019.60            | 1.776                          | 438.62             | 778.93             |
| A_68_P27282339 | chr10:79769158-79769202                           | NM_011789:4616     | Apc2          | INSIDE                 | 0.860                                                        | 2.443                          | 696.68             | 1702.32            | 2.101                          | 584.60             | 1228.42            |
| A_68_P27649728 | chr11:24064796-24064840                           | NM_001159290:84124 | Bcl11a        | INSIDE                 | 0.860                                                        | 3.468                          | 1557.72            | 5402.52            | 2.982                          | 1297.95            | 3869.99            |
| A_68_P27228312 | chr10:69652108-69652156                           | NM_001111121:92264 | Ccdc6         | INSIDE                 | 0.860                                                        | 2.172                          | 1173.43            | 2548.98            | 1.868                          | 848.88             | 1585.30            |

| ProbeName      | Target position of probe on CpG island microarray | TargetID                 | GeneSymbol    | CpG island Description | Ratio of relative methylation (TiO <sub>2</sub> -NP/Vehicle) | Sham group                     |                    |                    | TiO <sub>2</sub> -H group      |                    |                    |
|----------------|---------------------------------------------------|--------------------------|---------------|------------------------|--------------------------------------------------------------|--------------------------------|--------------------|--------------------|--------------------------------|--------------------|--------------------|
|                |                                                   |                          |               |                        |                                                              | Relative methylation (Cy5/Cy3) | Cy3 signal (Input) | Cy5 signal (MeDIP) | Relative methylation (Cy5/Cy3) | Cy3 signal (Input) | Cy5 signal (MeDIP) |
| A_68_P25020879 | chr7:29052937-29052981                            | NM_198425:59             | Eid2          | INSIDE                 | 0.860                                                        | 2.398                          | 357.60             | 857.40             | 2.061                          | 381.94             | 787.23             |
| A_68_P30143282 | chr15:37209352-37209396                           | NM_026496:46584          | Grlh2         | INSIDE                 | 0.860                                                        | 2.500                          | 888.49             | 2220.80            | 2.150                          | 684.71             | 1472.40            |
| A_68_P24757356 | chr6:113027164-113027208                          | NR_027010:52             | Gt(ROSA)26Sor | INSIDE                 | 0.860                                                        | 0.610                          | 1608.19            | 981.46             | 0.525                          | 1360.97            | 714.57             |
| A_68_P29071675 | chr13:58230317-58230361                           | NM_029872:421            | Hnmpa0        | PROMOTER               | 0.860                                                        | 0.566                          | 1796.97            | 1017.54            | 0.487                          | 1390.70            | 677.54             |
| A_68_P25285287 | chr7:91031249-91031293                            | NM_030705:1581           | Mesdc1        | INSIDE                 | 0.860                                                        | 2.020                          | 702.60             | 1419.45            | 1.738                          | 608.80             | 1057.89            |
| A_68_P28271087 | chr12:17551396-17551440                           | NM_013614:-260           | Odc1          | PROMOTER               | 0.860                                                        | 0.499                          | 1445.62            | 720.84             | 0.429                          | 1132.70            | 485.94             |
| A_68_P21839462 | chr2:167924551-167924595                          | NM_021409:18069          | Pard6b        | INSIDE                 | 0.860                                                        | 1.955                          | 1069.93            | 2091.43            | 1.681                          | 912.64             | 1534.16            |
| A_68_P23292757 | chr4:128404849-128404893                          | NM_001195083:56          | Phc2          | INSIDE                 | 0.860                                                        | 2.914                          | 468.62             | 1365.77            | 2.507                          | 466.18             | 1168.57            |
| A_68_P21310712 | chr2:69561046-69561090                            | NM_001081086:-76         | Ppig          | PROMOTER               | 0.860                                                        | 0.605                          | 2280.49            | 1379.01            | 0.520                          | 2161.66            | 1124.24            |
| A_68_P28079343 | chr11:102261298-102261342                         | NM_016759:6572           | Rundc3a       | INSIDE                 | 0.860                                                        | 0.655                          | 1834.44            | 1201.25            | 0.563                          | 1363.32            | 768.14             |
| A_68_P26373636 | chr9:26837227-26837271                            | NM_178027:431            | Vps26b        | INSIDE                 | 0.860                                                        | 2.361                          | 1430.79            | 3378.08            | 2.030                          | 1203.36            | 2442.82            |
| A_68_P21844027 | chr2:168719744-168719788                          | ENSMUST00000029064:32614 |               | INSIDE                 | 0.860                                                        | 2.017                          | 839.57             | 1693.36            | 1.734                          | 641.90             | 1113.18            |
| A_68_P25708988 | chr8:23170683-23170727                            | NM_007511:-158           | Atp7b         | DIVERGENT_PROMOTER     | 0.859                                                        | 0.553                          | 1049.51            | 580.29             | 0.475                          | 839.07             | 398.46             |
| A_68_P30287853 | chr15:65618917-65618962                           | NM_133766:337            | Efr3a         | INSIDE                 | 0.859                                                        | 0.626                          | 829.51             | 519.19             | 0.537                          | 812.52             | 436.69             |
| A_68_P20058120 | chr1:17082054-17082098                            | NM_020604:5894           | Jph1          | INSIDE                 | 0.859                                                        | 2.270                          | 962.01             | 2184.10            | 1.951                          | 918.78             | 1792.84            |
| A_68_P32029539 | chr19:25484768-25484818                           | NM_181404:173101         | Kank1         | INSIDE                 | 0.859                                                        | 4.443                          | 753.30             | 3346.88            | 3.818                          | 574.94             | 2195.28            |
| A_68_P26465910 | chr9:43943186-43943230                            | NM_023061:468            | Mcam          | INSIDE                 | 0.859                                                        | 2.819                          | 10155.84           | 28626.69           | 2.421                          | 7493.85            | 18142.66           |
| A_68_P32148599 | chr19:47328082-47328126                           | NM_001163480:24772       | Neurl1a       | INSIDE                 | 0.859                                                        | 1.678                          | 1316.91            | 2209.16            | 1.440                          | 1266.04            | 1823.30            |
| A_68_P28029987 | chr11:93817170-93817214                           | NM_001077529:-190        | Nme2          | PROMOTER               | 0.859                                                        | 1.625                          | 2610.77            | 4242.73            | 1.396                          | 1878.02            | 2621.06            |
| A_68_P26144744 | chr8:109948750-109948794                          | NM_026277:166            | Nob1          | INSIDE                 | 0.859                                                        | 0.421                          | 1470.13            | 619.21             | 0.362                          | 1187.88            | 429.94             |
| A_68_P23341302 | chr4:137237494-137237538                          | NM_001081155:-101        | Rap1gap       | PROMOTER               | 0.859                                                        | 0.566                          | 1748.81            | 989.14             | 0.486                          | 1551.74            | 753.66             |
| A_68_P20053851 | chr1:16083066-16083110                            | NM_011291:11426          | Rpl7          | DOWNSTREAM             | 0.859                                                        | 0.658                          | 1070.51            | 704.29             | 0.565                          | 943.86             | 533.51             |
| A_68_P32750681 | chrX:149204383-149204427                          | NM_172441:-400           | Shroom2       | PROMOTER               | 0.859                                                        | 2.098                          | 1026.89            | 2154.88            | 1.803                          | 516.93             | 931.88             |
| A_68_P26887824 | chr9:122076106-122076150                          | NM_001164572:49745       | Snrk          | INSIDE                 | 0.859                                                        | 1.931                          | 1860.62            | 3593.32            | 1.659                          | 1479.83            | 2454.32            |
| A_68_P31809748 | chr18:70631763-70631807                           | NM_172967:350            | 4930503L19Rik | INSIDE                 | 0.858                                                        | 1.613                          | 5722.58            | 9227.67            | 1.383                          | 4301.12            | 5948.33            |
| A_68_P25030928 | chr7:31099011-31099055                            | NM_198027:5261           | Alkbh6        | INSIDE                 | 0.858                                                        | 1.653                          | 1482.99            | 2452.08            | 1.419                          | 1240.14            | 1759.16            |
| A_68_P30743455 | chr16:48994040-48994084                           | NM_001110017:163         | Dzip3         | INSIDE                 | 0.858                                                        | 0.589                          | 2142.41            | 1261.15            | 0.505                          | 1712.68            | 864.69             |
| A_68_P21338839 | chr2:74529632-74529676                            | NM_013554:-350           | Hoxd10        | PROMOTER               | 0.858                                                        | 0.420                          | 1448.82            | 607.81             | 0.360                          | 1203.13            | 432.87             |
| A_68_P25179904 | chr7:72017616-72017660                            | NM_023239:288            | Ndnf2         | INSIDE                 | 0.858                                                        | 1.856                          | 777.85             | 1444.03            | 1.592                          | 721.51             | 1148.69            |
| A_68_P30422875 | chr15:88897983-88898032                           | NM_001002005:7852        | Panx2         | INSIDE                 | 0.858                                                        | 2.181                          | 394.11             | 859.70             | 1.871                          | 355.02             | 664.41             |
| A_68_P30346598 | chr15:76009831-76009878                           | NM_201394:16286          | Plec          | INSIDE                 | 0.858                                                        | 2.468                          | 1202.31            | 2967.73            | 2.118                          | 769.18             | 1629.25            |
| A_68_P21630923 | chr2:130468446-130468490                          | NM_197945:71             | Prosapip1     | INSIDE                 | 0.858                                                        | 0.419                          | 1380.97            | 579.22             | 0.360                          | 1169.54            | 421.11             |
| A_68_P30956060 | chr16:90284235-90284280                           | NM_178923:413            | Scaf4         | INSIDE                 | 0.858                                                        | 0.356                          | 1608.69            | 573.05             | 0.306                          | 1406.24            | 429.63             |
| A_68_P31791665 | chr18:67561243-67561287                           | NM_026473:10880          | Tubb6         | INSIDE                 | 0.858                                                        | 2.172                          | 1312.00            | 2849.59            | 1.863                          | 932.82             | 1737.67            |
| A_68_P30778638 | chr16:55974440-55974484                           | NR_027965:268            | 2310061J03Rik | INSIDE                 | 0.857                                                        | 0.689                          | 1429.28            | 984.82             | 0.590                          | 1203.25            | 710.51             |
| A_68_P27392942 | chr10:100051680-100051724                         | NM_175128:191            | 4930430F08Rik | INSIDE                 | 0.857                                                        | 0.464                          | 1322.35            | 613.97             | 0.398                          | 1138.39            | 453.05             |
| A_68_P32260338 | chrX:11664552-11664596                            | NM_029510:-6895          | Bcor          | PROMOTER               | 0.857                                                        | 4.067                          | 589.59             | 2397.97            | 3.487                          | 395.53             | 1379.31            |
| A_68_P28153229 | chr11:115255200-115255244                         | NM_001080929:11993       | Cdr2l         | INSIDE                 | 0.857                                                        | 2.854                          | 592.12             | 1689.69            | 2.447                          | 503.60             | 1232.21            |
| A_68_P26521944 | chr9:53475433-53475477                            | NM_001161618:158         | Cul5          | INSIDE                 | 0.857                                                        | 0.626                          | 1486.86            | 931.41             | 0.537                          | 1258.83            | 675.56             |
| A_68_P24620322 | chr6:88144530-88144574                            | NM_008090:-4105          | Gata2         | PROMOTER               | 0.857                                                        | 0.551                          | 1524.30            | 839.79             | 0.472                          | 1206.36            | 569.87             |
| A_68_P20553867 | chr1:120734448-120734492                          | NM_001081125:215726      | Gli2          | INSIDE                 | 0.857                                                        | 2.089                          | 1154.51            | 2411.62            | 1.791                          | 937.81             | 1679.34            |
| A_68_P23627553 | chr5:40035844-40035888                            | NM_010474:4              | Hs3st1        | INSIDE                 | 0.857                                                        | 0.682                          | 1595.87            | 1087.60            | 0.584                          | 1269.92            | 741.66             |
| A_68_P26020980 | chr8:87186400-87186444                            | NM_010499:329            | Ier2          | INSIDE                 | 0.857                                                        | 0.680                          | 1543.03            | 1049.62            | 0.583                          | 1337.27            | 779.19             |
| A_68_P27282832 | chr10:79844574-79844618                           | NM_198615:5800           | Mex3d         | INSIDE                 | 0.857                                                        | 1.841                          | 736.53             | 1356.13            | 1.577                          | 590.65             | 931.70             |
| A_68_P24009622 | chr5:115896965-115897009                          | NM_008629:17293          | Msi1          | INSIDE                 | 0.857                                                        | 7.366                          | 1071.52            | 7892.92            | 6.311                          | 817.21             | 5157.70            |
| A_68_P20638513 | chr1:137180458-137180502                          | NM_001159624:181         | Rnpep         | INSIDE                 | 0.857                                                        | 2.543                          | 1798.57            | 4574.14            | 2.180                          | 1652.18            | 3602.14            |
| A_68_P26044786 | chr8:91566839-91566883                            | NM_021390:1201           | Sall1         | INSIDE                 | 0.857                                                        | 0.556                          | 1461.98            | 812.58             | 0.476                          | 1413.40            | 673.36             |
| A_68_P21828030 | chr2:165980793-165980837                          | NM_028072:342            | Sulf2         | INSIDE                 | 0.857                                                        | 1.862                          | 1114.15            | 2074.51            | 1.596                          | 929.39             | 1483.30            |
| A_68_P20162423 | chr1:38893157-38893201                            | ENSMUST00000147695:-243  |               | PROMOTER               | 0.857                                                        | 3.628                          | 416.06             | 1509.67            | 3.111                          | 484.68             | 1507.74            |
| A_68_P32565630 | chrX:98989988-98990032                            | ENSMUST00000149761:-14   |               | PROMOTER               | 0.857                                                        | 3.188                          | 412.39             | 1314.79            | 2.732                          | 225.07             | 614.83             |
| A_68_P26575918 | chr9:63246657-63246701                            | NM_027090:373            | 2300009A05Rik | INSIDE                 | 0.856                                                        | 0.683                          | 1414.52            | 966.34             | 0.585                          | 1239.80            | 724.90             |

| ProbeName      | Target position of probe on CpG island microarray | TargetID                | GeneSymbol    | CpG island Description | Ratio of relative methylation (TiO <sub>2</sub> -NP/Vehicle) | Sham group                     |                    |                    | TiO <sub>2</sub> -H group      |                    |                    |
|----------------|---------------------------------------------------|-------------------------|---------------|------------------------|--------------------------------------------------------------|--------------------------------|--------------------|--------------------|--------------------------------|--------------------|--------------------|
|                |                                                   |                         |               |                        |                                                              | Relative methylation (Cy5/Cy3) | Cy3 signal (Input) | Cy5 signal (MeDIP) | Relative methylation (Cy5/Cy3) | Cy3 signal (Input) | Cy5 signal (MeDIP) |
| A_68_P30639252 | chr16:30009147-30009191                           | NR_033631:416           | 4632428C04Rik | INSIDE                 | 0.856                                                        | 0.493                          | 1521.23            | 749.82             | 0.422                          | 1333.11            | 562.24             |
| A_68_P24946542 | chr7:3597193-3597237                              | NM_146176:344           | Cnot3         | INSIDE                 | 0.856                                                        | 0.544                          | 1575.84            | 857.01             | 0.465                          | 1320.71            | 614.60             |
| A_68_P24798119 | chr6:120314850-120314894                          | NM_145997:756           | Kdm5a         | INSIDE                 | 0.856                                                        | 1.785                          | 2405.23            | 4292.52            | 1.528                          | 1795.89            | 2743.81            |
| A_68_P20823477 | chr1:172519538-172519582                          | NM_001109985:420        | Nos1ap        | INSIDE                 | 0.856                                                        | 0.347                          | 1929.22            | 669.04             | 0.297                          | 1567.61            | 465.33             |
| A_68_P31632519 | chr18:38349196-38349240                           | NM_029357:20198         | Pcdh1         | DOWNSTREAM             | 0.856                                                        | 1.946                          | 3320.62            | 6461.51            | 1.666                          | 2749.08            | 4580.35            |
| A_68_P20053921 | chr1:16095417-16095461                            | NM_133832:-524          | Rdh10         | DIVERGENT_PROMOTER     | 0.856                                                        | 0.563                          | 3415.37            | 1923.51            | 0.482                          | 2715.11            | 1308.20            |
| A_68_P31846733 | chr18:77493478-77493522                           | NM_013666:68915         | St8sia5       | INSIDE                 | 0.856                                                        | 2.862                          | 2168.86            | 6206.60            | 2.449                          | 1587.05            | 3887.18            |
| A_68_P23223139 | chr4:114730373-114730417                          | NM_011527:-1737         | Tal1          | PROMOTER               | 0.856                                                        | 0.612                          | 1326.13            | 812.06             | 0.524                          | 983.15             | 515.62             |
| A_68_P21753656 | chr2:153051085-153051129                          | NM_198617:71            | Tspyl3        | INSIDE                 | 0.856                                                        | 0.424                          | 1548.04            | 656.72             | 0.363                          | 1319.96            | 479.20             |
| A_68_P23185613 | chr4:106311998-106312042                          | NM_177667:16967         | Ttc22         | INSIDE                 | 0.856                                                        | 2.740                          | 764.15             | 2093.66            | 2.344                          | 675.82             | 1584.07            |
| A_68_P26542619 | chr9:57437422-57437466                            | NM_027895:186           | Ulk3          | INSIDE                 | 0.856                                                        | 3.077                          | 416.00             | 1280.13            | 2.634                          | 415.67             | 1094.84            |
| A_68_P21076582 | chr2:25994170-25994218                            | ENSMUST00000163836:128  |               | INSIDE                 | 0.856                                                        | 2.011                          | 1383.81            | 2782.70            | 1.721                          | 919.75             | 1583.07            |
| A_68_P25956923 | chr8:73987625-73987669                            | NM_022419:-90           | Abhd8         | DIVERGENT_PROMOTER     | 0.855                                                        | 0.504                          | 1212.26            | 610.67             | 0.431                          | 968.43             | 417.06             |
| A_68_P27179425 | chr10:60708665-60708712                           | NM_001081127:27498      | Adams14       | INSIDE                 | 0.855                                                        | 2.165                          | 1076.98            | 2331.96            | 1.851                          | 894.61             | 1655.78            |
| A_68_P31152211 | chr17:34256148-34256192                           | NR_037970:675           | Brd2          | INSIDE                 | 0.855                                                        | 0.393                          | 1509.34            | 592.46             | 0.336                          | 1100.95            | 369.38             |
| A_68_P33016565 | chr7:3424475-3424519                              | NM_133183:-926          | Cacng6        | PROMOTER               | 0.855                                                        | 0.553                          | 1337.08            | 739.42             | 0.473                          | 1045.67            | 494.68             |
| A_68_P28313705 | chr12:29237270-29237314                           | NM_001177964:-4090      | Dede2c        | PROMOTER               | 0.855                                                        | 2.798                          | 918.74             | 2570.65            | 2.392                          | 862.57             | 2063.52            |
| A_68_P31330058 | chr17:71006929-71006973                           | NM_001128181:95864      | Dlgap1        | INSIDE                 | 0.855                                                        | 2.982                          | 884.67             | 2638.29            | 2.550                          | 682.15             | 1739.27            |
| A_68_P26228890 | chr8:124308660-124308704                          | NM_020605:54224         | Jph3          | INSIDE                 | 0.855                                                        | 2.364                          | 821.48             | 1941.71            | 2.021                          | 861.29             | 1740.58            |
| A_68_P30495555 | chr15:101858847-101858891                         | NM_010664:222           | Krt18         | INSIDE                 | 0.855                                                        | 1.801                          | 1663.54            | 2995.82            | 1.539                          | 1474.88            | 2269.76            |
| A_68_P31921046 | chr19:4100132-4100176                             | NM_008851:-467          | Pitpnm1       | PROMOTER               | 0.855                                                        | 0.711                          | 1414.35            | 1005.89            | 0.608                          | 1175.60            | 714.62             |
| A_68_P23194281 | chr4:107704080-107704124                          | NM_172874:593           | Podn          | INSIDE                 | 0.855                                                        | 0.582                          | 2366.65            | 1376.73            | 0.497                          | 1898.04            | 944.02             |
| A_68_P20348982 | chr1:74552451-74552495                            | NM_021383:-161          | Rqcd1         | PROMOTER               | 0.855                                                        | 0.737                          | 3010.16            | 2218.48            | 0.630                          | 2287.86            | 1441.16            |
| A_68_P28038465 | chr11:95246295-95246339                           | NM_016752:81            | Slc35b1       | INSIDE                 | 0.855                                                        | 0.647                          | 1047.38            | 677.99             | 0.553                          | 830.59             | 459.71             |
| A_68_P27845266 | chr11:60692244-60692288                           | NM_001168507:274        | Tmem11        | INSIDE                 | 0.855                                                        | 1.698                          | 1575.52            | 2675.32            | 1.452                          | 1342.62            | 1949.47            |
| A_68_P29240104 | chr13:96106467-96106512                           | NM_028106:11298         | Zbed3         | INSIDE                 | 0.855                                                        | 1.900                          | 1140.12            | 2166.61            | 1.624                          | 904.24             | 1468.80            |
| A_68_P22782196 | chr4:23446473-23446517                            | ENSMUST00000118402:-907 |               | PROMOTER               | 0.855                                                        | 1.642                          | 1797.23            | 2951.03            | 1.404                          | 1574.11            | 2210.24            |
| A_68_P20844580 | chr1:176767041-176767085                          | NM_011825:84888         | Grem2         | INSIDE                 | 0.854                                                        | 2.054                          | 438.50             | 900.73             | 1.753                          | 376.56             | 660.24             |
| A_68_P22375206 | chr3:101254965-101255009                          | NM_207205:73939         | Igsf3         | INSIDE                 | 0.854                                                        | 2.849                          | 1100.20            | 3134.89            | 2.434                          | 911.55             | 2218.99            |
| A_68_P32040193 | chr19:27398062-27398106                           | NM_183179:976           | Kenv2         | INSIDE                 | 0.854                                                        | 1.829                          | 1739.69            | 3181.31            | 1.562                          | 1468.65            | 2293.79            |
| A_68_P23658785 | chr5:46247625-46247669                            | NM_172153:145           | Leor1         | INSIDE                 | 0.854                                                        | 0.516                          | 1728.58            | 891.40             | 0.440                          | 1211.96            | 533.84             |
| A_68_P20156381 | chr1:37932438-37932488                            | NM_001037918:3412       | Lipt1         | INSIDE                 | 0.854                                                        | 3.672                          | 252.22             | 926.06             | 3.135                          | 263.33             | 825.43             |
| A_68_P25954899 | chr8:73438336-73438380                            | NM_173013:8486          | Mtap1s        | INSIDE                 | 0.854                                                        | 1.857                          | 783.87             | 1455.67            | 1.586                          | 694.45             | 1101.42            |
| A_68_P26313299 | chr9:13553619-13553663                            | NM_023858:16            | Mtmr2         | INSIDE                 | 0.854                                                        | 4.163                          | 1367.12            | 5691.10            | 3.554                          | 1312.84            | 4665.26            |
| A_68_P26551406 | chr9:58884937-58884981                            | NM_001042752:-710       | Neol1         | PROMOTER               | 0.854                                                        | 0.640                          | 1026.93            | 657.37             | 0.546                          | 887.54             | 484.94             |
| A_68_P28048724 | chr11:96976323-96976367                           | NM_019507:301           | Tbx21         | INSIDE                 | 0.854                                                        | 0.674                          | 1752.22            | 1180.27            | 0.575                          | 1391.78            | 800.84             |
| A_68_P27898022 | chr11:69749285-69749329                           | NM_016875:-94           | Ybx2          | PROMOTER               | 0.854                                                        | 0.546                          | 1369.54            | 748.35             | 0.467                          | 1164.06            | 543.51             |
| A_68_P31620629 | chr18:36033105-36033149                           |                         |               | Unknown                | 0.854                                                        | 0.714                          | 2802.08            | 2001.29            | 0.610                          | 2030.93            | 1238.93            |
| A_68_P31215075 | chr17:48073237-48073281                           | ENSMUST00000117186:220  |               | INSIDE                 | 0.854                                                        | 1.880                          | 1066.41            | 2004.71            | 1.605                          | 799.58             | 1283.06            |
| A_68_P21436189 | chr2:93487479-93487523                            | NM_007442:4910          | Alx4          | INSIDE                 | 0.853                                                        | 2.497                          | 3313.61            | 8274.14            | 2.129                          | 2560.96            | 5451.94            |
| A_68_P28195049 | chr12:3427373-3427417                             | NM_172421:511           | Asx2          | INSIDE                 | 0.853                                                        | 0.590                          | 1462.83            | 863.10             | 0.503                          | 1032.21            | 519.53             |
| A_68_P26235080 | chr8:125201697-125201741                          | NM_001109873:357        | Cbfa2t3       | INSIDE                 | 0.853                                                        | 0.579                          | 3420.46            | 1978.96            | 0.493                          | 2777.38            | 1370.29            |
| A_68_P23898564 | chr5:93634999-93635043                            | NM_017367:501           | Ceni          | INSIDE                 | 0.853                                                        | 0.572                          | 1274.82            | 729.16             | 0.488                          | 1232.65            | 601.70             |
| A_68_P22324274 | chr3:90069716-90069760                            | NM_030069:717           | Dendd4b       | PROMOTER               | 0.853                                                        | 2.107                          | 919.58             | 1937.73            | 1.797                          | 806.71             | 1450.05            |
| A_68_P28598114 | chr12:85749779-85749823                           | NM_001026214:179        | Entpd5        | INSIDE                 | 0.853                                                        | 0.637                          | 2373.69            | 1511.16            | 0.543                          | 1997.86            | 1085.21            |
| A_68_P26867069 | chr9:118468837-118468881                          | NM_018748:53423         | Golga4        | INSIDE                 | 0.853                                                        | 1.727                          | 1827.39            | 3156.73            | 1.474                          | 1381.26            | 2036.50            |
| A_68_P30473865 | chr15:98087521-98087565                           | NM_027304:196           | H1 fnt        | INSIDE                 | 0.853                                                        | 2.591                          | 556.21             | 1440.96            | 2.210                          | 521.99             | 1153.75            |
| A_68_P26061528 | chr8:94324564-94324608                            | NM_008393:687           | Irx3          | INSIDE                 | 0.853                                                        | 0.571                          | 1403.07            | 801.38             | 0.487                          | 1079.53            | 525.94             |
| A_68_P30423405 | chr15:88970834-88970878                           | NM_013871:277           | Mapk12        | INSIDE                 | 0.853                                                        | 0.645                          | 1357.86            | 875.48             | 0.550                          | 1104.24            | 607.34             |
| A_68_P28456273 | chr12:57446579-57446623                           | NM_145442:281           | Mbip          | INSIDE                 | 0.853                                                        | 0.499                          | 1262.00            | 629.64             | 0.426                          | 1104.52            | 469.97             |
| A_68_P31201771 | chr17:45692645-45692689                           | NM_008690:2             | Nfkbi         | INSIDE                 | 0.853                                                        | 0.387                          | 2368.21            | 916.67             | 0.330                          | 1806.50            | 596.37             |

| ProbeName      | Target position of probe on CpG island microarray | TargetID               | GeneSymbol    | CpG island Description | Ratio of relative methylation (TiO <sub>2</sub> -NP/Vehicle) | Sham group                     |                    |                    | TiO <sub>2</sub> -H group      |                    |                    |
|----------------|---------------------------------------------------|------------------------|---------------|------------------------|--------------------------------------------------------------|--------------------------------|--------------------|--------------------|--------------------------------|--------------------|--------------------|
|                |                                                   |                        |               |                        |                                                              | Relative methylation (Cy5/Cy3) | Cy3 signal (Input) | Cy5 signal (MeDIP) | Relative methylation (Cy5/Cy3) | Cy3 signal (Input) | Cy5 signal (MeDIP) |
| A_68_P21095896 | chr2:29083214-29083258                            | NM_133500:20324        | Ntng2         | INSIDE                 | 0.853                                                        | 1.906                          | 918.60             | 1750.72            | 1.625                          | 744.86             | 1210.26            |
| A_68_P21817618 | chr2:164226131-164226175                          | NM_009036:-2541        | Rbpjl         | PROMOTER               | 0.853                                                        | 0.586                          | 1706.75            | 999.85             | 0.499                          | 1495.00            | 746.68             |
| A_68_P29073057 | chr13:58503189-58503233                           | NR_031761:-398         | Rmi1          | DIVERGENT_PROMOTER     | 0.853                                                        | 0.536                          | 3638.50            | 1949.81            | 0.457                          | 2789.95            | 1275.95            |
| A_68_P28957970 | chr13:38085587-38085631                           | NM_025965:451          | Ssr1          | INSIDE                 | 0.853                                                        | 0.588                          | 4399.52            | 2586.06            | 0.502                          | 3313.17            | 1661.72            |
| A_68_P28054176 | chr11:97914740-97914784                           | NM_146028:14           | Stac2         | INSIDE                 | 0.853                                                        | 0.622                          | 1609.48            | 1001.27            | 0.531                          | 1129.05            | 599.38             |
| A_68_P28176313 | chr11:119036206-119036250                         | NM_172443:53585        | Tbc1d16       | INSIDE                 | 0.853                                                        | 1.661                          | 1593.58            | 2647.03            | 1.418                          | 1340.44            | 1900.26            |
| A_68_P28974121 | chr13:40818660-40818705                           | NM_001122948:7130      | Tcfap2a       | INSIDE                 | 0.853                                                        | 0.479                          | 2078.19            | 995.78             | 0.409                          | 1796.97            | 734.15             |
| A_68_P30953391 | chr16:89867896-89867940                           | NM_009384:93154        | Tiam1         | INSIDE                 | 0.853                                                        | 1.992                          | 970.56             | 1933.73            | 1.700                          | 719.14             | 1222.83            |
| A_68_P30149668 | chr15:38400702-38400746                           | M10062:-8338           |               | PROMOTER               | 0.853                                                        | 2.543                          | 618.04             | 1571.97            | 2.171                          | 573.36             | 1244.59            |
| A_68_P25188288 | chr7:73572852-73572896                            | NM_053080:-511         | Aldh1a3       | PROMOTER               | 0.852                                                        | 0.656                          | 950.10             | 622.96             | 0.559                          | 774.39             | 432.54             |
| A_68_P21334258 | chr2:73748716-73748760                            | NM_175015:613          | Atp5g3        | INSIDE                 | 0.852                                                        | 0.477                          | 1908.27            | 910.78             | 0.406                          | 1500.39            | 609.77             |
| A_68_P24467400 | chr6:55067624-55067668                            | NM_009953:15320        | Chr2          | INSIDE                 | 0.852                                                        | 0.358                          | 2240.78            | 801.15             | 0.305                          | 1837.14            | 559.85             |
| A_68_P31208134 | chr17:46790061-46790105                           | NM_025611:2796         | Cul7          | INSIDE                 | 0.852                                                        | 4.434                          | 3495.97            | 15501.17           | 3.776                          | 2347.62            | 8864.61            |
| A_68_P24388783 | chr6:40385658-40385702                            | NM_175528:452          | E330009J07Rik | INSIDE                 | 0.852                                                        | 0.470                          | 1373.65            | 645.17             | 0.400                          | 1221.90            | 489.08             |
| A_68_P21486501 | chr2:103810745-103810789                          | NM_001142335:323       | Lmo2          | INSIDE                 | 0.852                                                        | 1.589                          | 4391.84            | 6978.22            | 1.354                          | 3518.83            | 4765.80            |
| A_68_P21102112 | chr2:30112106-30112150                            | NM_177725:18840        | Lrrc8a        | INSIDE                 | 0.852                                                        | 2.888                          | 581.73             | 1679.83            | 2.460                          | 512.01             | 1259.49            |
| A_68_P25590419 | chr7:148879650-148879694                          | NM_023566:3412         | Muc2          | INSIDE                 | 0.852                                                        | 1.849                          | 847.79             | 1567.57            | 1.576                          | 718.45             | 1132.19            |
| A_68_P21722764 | chr2:147013854-147013898                          | NM_001077632:-1738     | Nkx2-2        | PROMOTER               | 0.852                                                        | 0.689                          | 1399.54            | 964.39             | 0.587                          | 1161.48            | 681.77             |
| A_68_P26591021 | chr9:65917626-65917670                            | NM_001025612:-110      | Snx22         | PROMOTER               | 0.852                                                        | 1.814                          | 1286.20            | 2333.66            | 1.546                          | 1126.40            | 1741.43            |
| A_68_P29433274 | chr14:18005375-18005419                           |                        |               | Unknown                | 0.852                                                        | 1.699                          | 1695.96            | 2881.32            | 1.448                          | 1349.17            | 1953.92            |
| A_68_P24768722 | chr6:114987825-114987869                          | NM_026894:46           | 1500001M20Rik | INSIDE                 | 0.851                                                        | 2.008                          | 836.01             | 1679.11            | 1.710                          | 749.56             | 1281.84            |
| A_68_P22062861 | chr3:37211563-37211607                            | NM_001008502:109       | Bbs12         | INSIDE                 | 0.851                                                        | 0.588                          | 1788.88            | 1052.48            | 0.501                          | 1423.99            | 712.94             |
| A_68_P26811950 | chr9:107838507-107838551                          | NM_145621:278          | Camkv         | INSIDE                 | 0.851                                                        | 0.374                          | 1986.08            | 742.65             | 0.318                          | 1516.39            | 482.38             |
| A_68_P23229430 | chr4:116136663-116136707                          | NM_001042743:104       | Mast2         | INSIDE                 | 0.851                                                        | 2.859                          | 288.28             | 824.32             | 2.432                          | 332.93             | 809.85             |
| A_68_P24623658 | chr6:88674283-88674327                            | NM_001166249:-101      | Mgll          | PROMOTER               | 0.851                                                        | 1.904                          | 1570.90            | 2991.49            | 1.620                          | 1364.86            | 2211.54            |
| A_68_P30126798 | chr15:34012651-34012695                           | NM_026002:199          | Mtdh          | INSIDE                 | 0.851                                                        | 1.997                          | 731.60             | 1460.73            | 1.699                          | 788.53             | 1339.40            |
| A_68_P21419564 | chr2:90744694-90744738                            | NM_026688:162          | Ndufs3        | INSIDE                 | 0.851                                                        | 0.685                          | 2742.52            | 1877.76            | 0.583                          | 2156.27            | 1256.89            |
| A_68_P24466342 | chr6:54894109-54894153                            | NM_001171007:27525     | Nod1          | INSIDE                 | 0.851                                                        | 3.692                          | 294.00             | 1085.41            | 3.142                          | 262.59             | 825.11             |
| A_68_P24053560 | chr5:123479219-123479263                          | NM_175423:14158        | Orai1         | INSIDE                 | 0.851                                                        | 1.820                          | 1674.48            | 3047.53            | 1.548                          | 1299.47            | 2011.75            |
| A_68_P28451744 | chr12:56521734-56521784                           | NM_011968:21947        | PsmA6         | DOWNSTREAM             | 0.851                                                        | 2.122                          | 455.25             | 966.17             | 1.807                          | 458.75             | 828.84             |
| A_68_P30001153 | chr15:8586301-8586345                             | NM_148938:74485        | Sle1a3        | INSIDE                 | 0.851                                                        | 3.821                          | 753.82             | 2880.70            | 3.254                          | 643.24             | 2092.99            |
| A_68_P26750367 | chr9:96896461-96896505                            | NM_145134:22292        | Spsb4         | INSIDE                 | 0.851                                                        | 2.744                          | 1168.76            | 3207.35            | 2.335                          | 1009.01            | 2356.47            |
| A_68_P28466189 | chr12:59313486-59313530                           | NM_009216:718          | Sstr1         | INSIDE                 | 0.851                                                        | 1.822                          | 857.85             | 1562.65            | 1.549                          | 820.01             | 1270.44            |
| A_68_P28013352 | chr11:90549070-90549114                           | NM_028011:-177         | Tom11         | PROMOTER               | 0.851                                                        | 1.801                          | 703.80             | 1267.67            | 1.532                          | 669.21             | 1025.54            |
| A_68_P30401102 | chr15:85341114-85341158                           | ENSMUST0000079690:-105 |               | PROMOTER               | 0.851                                                        | 2.089                          | 1584.15            | 3308.80            | 1.777                          | 1179.93            | 2096.42            |
| A_68_P28711045 | chr12:107004711-107004755                         | NM_030187:60541        | Ak7           | INSIDE                 | 0.850                                                        | 1.886                          | 1341.73            | 2530.39            | 1.602                          | 1156.71            | 1853.46            |
| A_68_P25656683 | chr8:11634954-11634998                            | NR_030781:60           | Ankrd10       | INSIDE                 | 0.850                                                        | 0.716                          | 2615.71            | 1873.79            | 0.609                          | 2071.74            | 1261.08            |
| A_68_P23260764 | chr4:122781955-122781999                          | NM_007559:-431         | Bmp8b         | PROMOTER               | 0.850                                                        | 0.470                          | 1183.19            | 555.93             | 0.399                          | 1014.81            | 405.06             |
| A_68_P25021005 | chr7:29079533-29079577                            | NM_007866:7250         | Dll3          | INSIDE                 | 0.850                                                        | 2.228                          | 1079.82            | 2405.43            | 1.894                          | 986.79             | 1869.02            |
| A_68_P24870736 | chr6:135994225-135994269                          | NM_008171:129283       | Grin2b        | INSIDE                 | 0.850                                                        | 2.345                          | 945.15             | 2215.91            | 1.992                          | 766.56             | 1526.93            |
| A_68_P22375207 | chr3:101255068-101255112                          | NM_207205:74043        | Igsf3         | INSIDE                 | 0.850                                                        | 2.204                          | 915.92             | 2019.06            | 1.873                          | 849.84             | 1591.81            |
| A_68_P23598365 | chr5:35448131-35448175                            | NM_013587:194          | Lrpap1        | INSIDE                 | 0.850                                                        | 0.687                          | 1221.85            | 839.14             | 0.583                          | 1022.85            | 596.75             |
| A_68_P29446631 | chr14:21212821-21212865                           | NM_025440:-65          | Mrps16        | PROMOTER               | 0.850                                                        | 0.696                          | 1931.82            | 1344.32            | 0.592                          | 1717.79            | 1016.48            |
| A_68_P30456844 | chr15:95059724-95059769                           | NM_016743:299391       | Nell2         | INSIDE                 | 0.850                                                        | 3.069                          | 283.24             | 869.21             | 2.608                          | 229.68             | 599.04             |
| A_68_P24602909 | chr6:85026381-85026425                            | NR_002702:268          | Npm3-ps1      | INSIDE                 | 0.850                                                        | 1.705                          | 1275.75            | 2174.97            | 1.449                          | 1097.20            | 1589.41            |
| A_68_P31632590 | chr18:38357395-38357439                           | NM_029357:12000        | Pedh1         | INSIDE                 | 0.850                                                        | 2.008                          | 605.30             | 1215.59            | 1.707                          | 524.54             | 895.22             |
| A_68_P27830412 | chr11:58144420-58144464                           | NM_001161338:223       | Sh3bp5l       | INSIDE                 | 0.850                                                        | 2.193                          | 1761.18            | 3861.92            | 1.863                          | 1191.87            | 2220.56            |
| A_68_P22456981 | chr3:117571662-117571706                          | NM_001190156:170       | Snx7          | INSIDE                 | 0.850                                                        | 0.671                          | 1411.16            | 946.51             | 0.570                          | 1253.01            | 714.41             |
| A_68_P24912678 | chr6:143782013-143782057                          | NM_001113559:376044    | Sox5          | INSIDE                 | 0.850                                                        | 2.232                          | 1372.61            | 3064.02            | 1.898                          | 1171.29            | 2223.62            |
| A_68_P25507973 | chr7:135039093-135039137                          | NM_178600:17           | Vkore1        | INSIDE                 | 0.850                                                        | 0.722                          | 1747.01            | 1261.06            | 0.614                          | 1402.30            | 860.89             |
| A_68_P21081716 | chr2:26865601-26865645                            | NM_029862:137          | 5930434B04Rik | INSIDE                 | 0.849                                                        | 0.723                          | 2945.24            | 2128.85            | 0.614                          | 2187.81            | 1342.96            |

| ProbeName      | Target position of probe on CpG island microarray | TargetID                | GeneSymbol    | CpG island Description | Ratio of relative methylation (TiO <sub>2</sub> -NP/Vehicle) | Sham group                     |                    |                    | TiO <sub>2</sub> -H group      |                    |                    |
|----------------|---------------------------------------------------|-------------------------|---------------|------------------------|--------------------------------------------------------------|--------------------------------|--------------------|--------------------|--------------------------------|--------------------|--------------------|
|                |                                                   |                         |               |                        |                                                              | Relative methylation (Cy5/Cy3) | Cy3 signal (Input) | Cy5 signal (MeDIP) | Relative methylation (Cy5/Cy3) | Cy3 signal (Input) | Cy5 signal (MeDIP) |
| A_68_P23562906 | chr5:28793388-28793432                            | NR_015562:-113          | 9530036O11Rik | PROMOTER               | 0.849                                                        | 0.675                          | 1273.10            | 859.83             | 0.573                          | 1057.69            | 606.54             |
| A_68_P32710887 | chrX:139401132-139401176                          | NM_019496:117           | Ammecr1       | INSIDE                 | 0.849                                                        | 1.883                          | 935.03             | 1760.43            | 1.598                          | 578.57             | 924.64             |
| A_68_P21424190 | chr2:91550470-91550514                            | NM_145528:241           | Atg13         | INSIDE                 | 0.849                                                        | 0.656                          | 1985.80            | 1303.49            | 0.557                          | 1465.03            | 816.03             |
| A_68_P24793357 | chr6:119430927-119430971                          | NM_133940:1263          | Fbx114        | INSIDE                 | 0.849                                                        | 0.526                          | 1048.11            | 551.59             | 0.447                          | 758.79             | 339.07             |
| A_68_P31201909 | chr17:45710173-45710217                           | NM_008302:16            | Hsp90ab1      | INSIDE                 | 0.849                                                        | 0.603                          | 1445.30            | 872.14             | 0.512                          | 1242.38            | 636.56             |
| A_68_P31929691 | chr19:5609833-5609877                             | NR_037603:-147          | Kat5          | PROMOTER               | 0.849                                                        | 0.717                          | 3121.55            | 2239.32            | 0.609                          | 2286.47            | 1392.91            |
| A_68_P26346081 | chr9:21038114-21038158                            | NM_001110305:5640       | Keap1         | INSIDE                 | 0.849                                                        | 2.108                          | 1248.64            | 2632.66            | 1.791                          | 1008.95            | 1806.74            |
| A_68_P23809986 | chr5:75970756-75970800                            | NM_001122733:-233       | Kit           | PROMOTER               | 0.849                                                        | 0.643                          | 870.64             | 559.66             | 0.546                          | 702.78             | 383.45             |
| A_68_P30224202 | chr15:53734012-53734057                           | NM_177225:-43           | Samd12        | PROMOTER               | 0.849                                                        | 0.555                          | 1293.49            | 718.17             | 0.471                          | 1027.27            | 484.18             |
| A_68_P32672207 | chrX:131009751-131009795                          | NM_028958:1257          | Taf7l         | INSIDE                 | 0.849                                                        | 2.137                          | 819.26             | 1750.57            | 1.815                          | 479.06             | 869.28             |
| A_68_P26158627 | chr8:112248255-112248299                          | NM_029468:18289         | Zfp821        | INSIDE                 | 0.849                                                        | 3.701                          | 2188.25            | 8097.69            | 3.140                          | 1624.64            | 5101.40            |
| A_68_P28272752 | chr12:17888520-17888564                           | ENSMUST00000169996:-460 |               | PROMOTER               | 0.849                                                        | 0.591                          | 2038.46            | 1205.54            | 0.502                          | 1749.75            | 878.76             |
| A_68_P29390920 | chr14:9498555-9498599                             | NM_028934:228           | 4930452B06Rik | INSIDE                 | 0.848                                                        | 0.548                          | 1178.95            | 645.63             | 0.464                          | 1027.36            | 476.97             |
| A_68_P24330586 | chr6:30124108-30124152                            | NR_038124:-2492         | BB283400      | DIVERGENT_PROMOTER     | 0.848                                                        | 0.688                          | 1193.92            | 821.74             | 0.583                          | 1008.97            | 588.73             |
| A_68_P26954143 | chr10:13684496-13684540                           | NM_010437:-1666         | Hivep2        | PROMOTER               | 0.848                                                        | 0.416                          | 1641.40            | 682.86             | 0.353                          | 1348.59            | 475.79             |
| A_68_P26022001 | chr8:87323016-87323060                            | NM_001081982:1201       | Nfix          | INSIDE                 | 0.848                                                        | 2.149                          | 673.91             | 1448.31            | 1.824                          | 575.31             | 1049.09            |
| A_68_P20474867 | chr1:99991841-99991885                            | NM_013626:347           | Pam           | INSIDE                 | 0.848                                                        | 0.461                          | 1481.79            | 683.55             | 0.391                          | 1186.49            | 464.15             |
| A_68_P22356817 | chr3:97671916-97671960                            | NM_177145:297           | Pde4dip       | INSIDE                 | 0.848                                                        | 0.534                          | 1109.77            | 592.35             | 0.453                          | 894.80             | 405.15             |
| A_68_P26138085 | chr8:108687070-108687114                          | NM_133792:12794         | Pla2g15       | INSIDE                 | 0.848                                                        | 2.057                          | 1537.38            | 3162.39            | 1.745                          | 1212.69            | 2116.21            |
| A_68_P29701295 | chr14:70843090-70843134                           | NM_001164082:-78        | Poir3d        | PROMOTER               | 0.848                                                        | 0.649                          | 1613.46            | 1047.39            | 0.550                          | 1324.53            | 728.74             |
| A_68_P30990392 | chr16:96212465-96212509                           | NM_019537:24            | Psmg1         | INSIDE                 | 0.848                                                        | 0.543                          | 1377.18            | 748.22             | 0.461                          | 1174.19            | 540.90             |
| A_68_P25265266 | chr7:87343315-87343359                            | NM_013659:11610         | Sema4b        | INSIDE                 | 0.848                                                        | 2.530                          | 1140.55            | 2885.45            | 2.146                          | 1038.26            | 2228.13            |
| A_68_P27325552 | chr10:87922308-87922352                           | NM_011517:-1            | Sycp3         | PROMOTER               | 0.848                                                        | 1.890                          | 1665.99            | 3148.51            | 1.602                          | 1243.93            | 1992.68            |
| A_68_P31099002 | chr17:24824527-24824571                           | NM_011522:2346          | Syng3         | INSIDE                 | 0.848                                                        | 0.656                          | 1709.91            | 1121.60            | 0.556                          | 1382.87            | 768.81             |
| A_68_P32021817 | chr19:24205542-24205588                           | NM_001198985:43066      | Tjp2          | INSIDE                 | 0.848                                                        | 3.045                          | 1171.94            | 3568.67            | 2.583                          | 914.63             | 2362.20            |
| A_68_P31791611 | chr18:67551169-67551213                           | NM_026473:806           | Tubb6         | INSIDE                 | 0.848                                                        | 0.550                          | 1410.19            | 776.03             | 0.467                          | 1070.32            | 499.42             |
| A_68_P24424840 | chr6:47855086-47855130                            | NM_146175:27555         | Zfp282        | INSIDE                 | 0.848                                                        | 2.187                          | 1122.42            | 2454.28            | 1.855                          | 846.65             | 1570.16            |
| A_68_P29560845 | chr14:41826844-41826888                           | NM_027464:198           | 5730469M10Rik | INSIDE                 | 0.847                                                        | 0.597                          | 1135.62            | 678.27             | 0.506                          | 962.17             | 487.02             |
| A_68_P29223870 | chr13:93196035-93196079                           | NM_175455:133           | Ankrd34b      | INSIDE                 | 0.847                                                        | 0.470                          | 1342.40            | 631.26             | 0.398                          | 989.82             | 394.15             |
| A_68_P27535286 | chr10:126763506-126763550                         | NM_146011:2746          | Arhgap9       | INSIDE                 | 0.847                                                        | 0.572                          | 960.27             | 549.39             | 0.485                          | 820.03             | 397.45             |
| A_68_P29604083 | chr14:52604387-52604431                           | NM_001145921:-99        | Arhgef40      | PROMOTER               | 0.847                                                        | 0.721                          | 4484.95            | 3235.38            | 0.611                          | 3772.23            | 2304.61            |
| A_68_P23336930 | chr4:136501732-136501776                          | NM_007939:10977         | Epha8         | INSIDE                 | 0.847                                                        | 2.119                          | 926.27             | 1962.96            | 1.795                          | 853.14             | 1531.68            |
| A_68_P28463159 | chr12:58639836-58639880                           | NM_008259:7250          | Foxa1         | DOWNSTREAM             | 0.847                                                        | 0.552                          | 1000.31            | 551.75             | 0.467                          | 859.98             | 401.75             |
| A_68_P25307425 | chr7:96553431-96553475                            | NM_008055:577           | Fzd4          | INSIDE                 | 0.847                                                        | 0.674                          | 1274.46            | 858.81             | 0.570                          | 1131.08            | 645.27             |
| A_68_P28977622 | chr13:41454095-41454139                           | NM_017464:254           | Nedd9         | INSIDE                 | 0.847                                                        | 0.495                          | 1344.46            | 665.13             | 0.419                          | 1129.48            | 473.09             |
| A_68_P22859776 | chr4:40918121-40918165                            | NM_023739:167           | Nfx1          | INSIDE                 | 0.847                                                        | 2.781                          | 603.07             | 1677.09            | 2.356                          | 669.48             | 1577.52            |
| A_68_P31626772 | chr18:37181762-37181806                           | NM_138663:1901          | Pcdha12       | INSIDE                 | 0.847                                                        | 2.498                          | 2044.68            | 5107.05            | 2.116                          | 1566.88            | 3315.46            |
| A_68_P22906126 | chr4:49645116-49645160                            | NM_001163263:207        | Rnf20         | INSIDE                 | 0.847                                                        | 0.591                          | 1053.45            | 623.07             | 0.501                          | 851.05             | 426.20             |
| A_68_P26817066 | chr9:108756909-108756953                          | NM_134420:557           | Slc26a6       | INSIDE                 | 0.847                                                        | 1.897                          | 611.04             | 1159.30            | 1.607                          | 500.29             | 803.95             |
| A_68_P24432385 | chr6:49345373-49345417                            | NM_029916:-208          | Stk31         | PROMOTER               | 0.847                                                        | 1.981                          | 1375.24            | 2724.18            | 1.677                          | 1175.56            | 1971.30            |
| A_68_P29613141 | chr14:55203509-55203559                           | NM_028890:21211         | 4931414P19Rik | INSIDE                 | 0.846                                                        | 2.810                          | 961.11             | 2701.10            | 2.378                          | 726.05             | 1726.61            |
| A_68_P25608862 | chr7:151924611-151924655                          | NM_178642:-249          | Ano1          | PROMOTER               | 0.846                                                        | 0.654                          | 1364.41            | 892.57             | 0.553                          | 1110.48            | 614.54             |
| A_68_P27793109 | chr11:51103712-51103756                           | NM_153393:313           | Col23a1       | INSIDE                 | 0.846                                                        | 2.250                          | 825.15             | 1856.90            | 1.903                          | 710.89             | 1353.18            |
| A_68_P25592942 | chr7:149280795-149280840                          | NM_008748:372           | Dusp8         | INSIDE                 | 0.846                                                        | 0.498                          | 1874.07            | 933.83             | 0.421                          | 1519.68            | 640.48             |
| A_68_P27550687 | chr11:3102424-3102468                             | NM_023743:-139          | Eif4enif1     | PROMOTER               | 0.846                                                        | 1.798                          | 1134.89            | 2040.55            | 1.521                          | 1129.98            | 1718.37            |
| A_68_P27845442 | chr11:60727111-60727155                           | NM_025294:162           | Gm16515       | INSIDE                 | 0.846                                                        | 0.498                          | 1542.25            | 768.72             | 0.422                          | 1393.91            | 587.82             |
| A_68_P25952866 | chr8:73118683-73118727                            | NM_023627:325           | Isyn1         | INSIDE                 | 0.846                                                        | 0.681                          | 1952.76            | 1329.59            | 0.576                          | 1583.39            | 912.08             |
| A_68_P30346617 | chr15:76012075-76012119                           | NM_201394:14044         | Plec          | INSIDE                 | 0.846                                                        | 2.198                          | 868.44             | 1908.64            | 1.859                          | 697.41             | 1296.78            |
| A_68_P29619052 | chr14:56262619-56262663                           | NM_028780:3             | Tm9sf1        | INSIDE                 | 0.846                                                        | 2.111                          | 743.36             | 1569.51            | 1.786                          | 717.39             | 1281.43            |
| A_68_P26234572 | chr8:125135779-125135823                          | NM_021502:275           | Trappe2l      | INSIDE                 | 0.846                                                        | 0.582                          | 1061.95            | 617.98             | 0.492                          | 841.89             | 414.51             |
| A_68_P21910753 | chr2:181194478-181194522                          | NM_028125:-369          | Zbtb46        | PROMOTER               | 0.846                                                        | 3.523                          | 296.02             | 1042.86            | 2.981                          | 273.26             | 814.63             |

| ProbeName      | Target position of probe on CpG island microarray | TargetID                | GeneSymbol    | CpG island Description | Ratio of relative methylation (TiO <sub>2</sub> -NP/Vehicle) | Sham group                     |                    |                    | TiO <sub>2</sub> -H group      |                    |                    |
|----------------|---------------------------------------------------|-------------------------|---------------|------------------------|--------------------------------------------------------------|--------------------------------|--------------------|--------------------|--------------------------------|--------------------|--------------------|
|                |                                                   |                         |               |                        |                                                              | Relative methylation (Cy5/Cy3) | Cy3 signal (Input) | Cy5 signal (MeDIP) | Relative methylation (Cy5/Cy3) | Cy3 signal (Input) | Cy5 signal (MeDIP) |
| A_68_P22200393 | chr3:65333036-65333080                            | NR_027955:278           | 4931440P22Rik | INSIDE                 | 0.845                                                        | 7.501                          | 2998.69            | 22493.29           | 6.336                          | 2445.82            | 15495.75           |
| A_68_P28752183 | chr12:113976936-113976980                         | NM_001024602:16574      | AW555464      | INSIDE                 | 0.845                                                        | 2.502                          | 1254.50            | 3138.79            | 2.115                          | 923.51             | 1953.46            |
| A_68_P31092909 | chr17:23803781-23803825                           | NM_153784:6313          | Ccdc64b       | INSIDE                 | 0.845                                                        | 2.321                          | 983.42             | 2282.87            | 1.961                          | 689.77             | 1352.74            |
| A_68_P24980345 | chr7:16803427-16803471                            | NM_027883:3933          | Dhx34         | INSIDE                 | 0.845                                                        | 2.059                          | 1223.24            | 2518.49            | 1.741                          | 1039.51            | 1809.45            |
| A_68_P26779718 | chr9:102255865-102255909                          | NM_001168296:1137       | Ephb1         | INSIDE                 | 0.845                                                        | 0.598                          | 876.13             | 523.58             | 0.505                          | 718.66             | 362.76             |
| A_68_P30365867 | chr15:79177744-79177788                           | NM_010755:-341          | Maff          | PROMOTER               | 0.845                                                        | 0.472                          | 1357.58            | 640.12             | 0.399                          | 1002.50            | 399.61             |
| A_68_P22788125 | chr4:24825516-24825560                            | NM_026742:309           | Ndufa4        | INSIDE                 | 0.845                                                        | 1.624                          | 2329.14            | 3781.68            | 1.372                          | 2006.99            | 2754.22            |
| A_68_P30447285 | chr15:93333764-93333813                           | NM_001033217:92534      | Prickle1      | INSIDE                 | 0.845                                                        | 2.747                          | 1239.55            | 3404.62            | 2.322                          | 996.51             | 2313.83            |
| A_68_P30955584 | chr16:90220772-90220816                           | NM_011434:-192          | Sod1          | PROMOTER               | 0.845                                                        | 0.708                          | 1796.50            | 1272.14            | 0.598                          | 1342.95            | 803.56             |
| A_68_P22889892 | chr4:46663146-46663190                            | NM_198664:-97           | Tbc1d2        | PROMOTER               | 0.845                                                        | 0.622                          | 1510.32            | 939.35             | 0.526                          | 1227.64            | 645.16             |
| A_68_P28974008 | chr13:40804611-40804655                           | NM_001122948:21180      | Tcfap2a       | DOWNSTREAM             | 0.845                                                        | 1.641                          | 3567.68            | 5854.06            | 1.387                          | 2770.82            | 3843.59            |
| A_68_P21568844 | chr2:119119741-119119785                          | NM_172269:5285          | Vps18         | INSIDE                 | 0.845                                                        | 3.629                          | 393.78             | 1428.90            | 3.065                          | 413.21             | 1266.63            |
| A_68_P24127580 | chr5:138229716-138229763                          | NM_001005426:710        | Zcwpw1        | INSIDE                 | 0.845                                                        | 2.819                          | 328.05             | 924.88             | 2.381                          | 247.13             | 588.52             |
| A_68_P22775540 | chr4:21858745-21858789                            | NM_175234:294           | 6230409E13Rik | INSIDE                 | 0.844                                                        | 0.433                          | 1644.96            | 711.75             | 0.365                          | 1239.34            | 452.61             |
| A_68_P30284264 | chr15:64753856-64753901                           | NM_009623:-20           | Adecy8        | PROMOTER               | 0.844                                                        | 0.629                          | 2752.57            | 1731.47            | 0.531                          | 1994.22            | 1058.58            |
| A_68_P25393095 | chr7:112729883-112729927                          | NM_009685:145           | Apbb1         | INSIDE                 | 0.844                                                        | 0.627                          | 3486.44            | 2186.44            | 0.529                          | 2863.81            | 1515.12            |
| A_68_P28080439 | chr11:102467320-102467364                         | NM_020510:1598          | Fzd2          | INSIDE                 | 0.844                                                        | 0.467                          | 1313.42            | 613.52             | 0.394                          | 977.12             | 385.31             |
| A_68_P28154358 | chr11:115465110-115465154                         | NM_173048:88            | Gga3          | INSIDE                 | 0.844                                                        | 0.704                          | 3247.71            | 2287.12            | 0.594                          | 2693.78            | 1601.01            |
| A_68_P30723335 | chr16:44746085-44746129                           | NM_001159329:370        | Gtbp8         | INSIDE                 | 0.844                                                        | 0.633                          | 1488.96            | 942.66             | 0.534                          | 1223.51            | 653.74             |
| A_68_P31154614 | chr17:34724452-34724496                           | NM_010929:23235         | Notch4        | INSIDE                 | 0.844                                                        | 1.809                          | 740.81             | 1339.76            | 1.526                          | 749.62             | 1143.69            |
| A_68_P28058442 | chr11:98635216-98635261                           | NM_145434:1318          | Nr1d1         | INSIDE                 | 0.844                                                        | 0.418                          | 1698.78            | 710.58             | 0.353                          | 1410.94            | 498.39             |
| A_68_P29141938 | chr13:73901290-73901334                           | NM_011390:168           | Slc12a7       | INSIDE                 | 0.844                                                        | 0.362                          | 1681.38            | 609.15             | 0.306                          | 1346.79            | 412.02             |
| A_68_P23974100 | chr5:109203943-109203987                          | NM_026109:20418         | Tmed11        | DOWNSTREAM             | 0.844                                                        | 3.253                          | 1606.18            | 5224.30            | 2.746                          | 1268.02            | 3482.08            |
| A_68_P23537865 | chr5:23181176-23181220                            | ENSMUST00000157734:-999 |               | PROMOTER               | 0.844                                                        | 0.594                          | 2044.09            | 1214.40            | 0.501                          | 1167.12            | 847.96             |
| A_68_P23293014 | chr4:128444607-128444651                          | NM_001009819:8127       | A3gal2        | INSIDE                 | 0.843                                                        | 2.123                          | 937.50             | 1989.94            | 1.789                          | 732.16             | 1309.88            |
| A_68_P23410308 | chr4:150502691-150502741                          | NM_001081557:733161     | Camta1        | INSIDE                 | 0.843                                                        | 3.548                          | 243.31             | 863.24             | 2.992                          | 284.83             | 852.21             |
| A_68_P25827948 | chr8:46108836-46108887                            | NM_001081286:73300      | Fat1          | INSIDE                 | 0.843                                                        | 1.960                          | 612.52             | 1200.55            | 1.653                          | 485.15             | 801.77             |
| A_68_P28925106 | chr13:31899841-31899885                           | NM_008592:1348          | Foxc1         | INSIDE                 | 0.843                                                        | 2.497                          | 8538.70            | 21323.20           | 2.106                          | 7056.43            | 14862.57           |
| A_68_P27540023 | chr10:127631990-127632034                         | NM_001033264:322        | Gls2          | INSIDE                 | 0.843                                                        | 0.610                          | 2468.36            | 1505.85            | 0.514                          | 2010.81            | 1033.63            |
| A_68_P23057188 | chr4:82152852-82152896                            | NM_001113209:-1662      | Nfib          | PROMOTER               | 0.843                                                        | 0.708                          | 3677.72            | 2604.44            | 0.597                          | 3020.24            | 1803.18            |
| A_68_P26469101 | chr9:44516750-44516794                            | NM_153537:26505         | Phldb1        | INSIDE                 | 0.843                                                        | 2.202                          | 5956.48            | 13116.50           | 1.857                          | 4222.49            | 7841.62            |
| A_68_P30941180 | chr16:87699079-87699123                           | NM_007520:-98           | Bach1         | PROMOTER               | 0.842                                                        | 0.698                          | 1390.25            | 969.99             | 0.588                          | 1170.73            | 687.99             |
| A_68_P23339477 | chr4:136913646-136913690                          | NM_009861:-16           | Cdc42         | PROMOTER               | 0.842                                                        | 0.614                          | 1579.56            | 969.48             | 0.517                          | 1370.41            | 708.21             |
| A_68_P28752835 | chr12:114067766-114067810                         | NM_028023:-188          | Cdec4         | PROMOTER               | 0.842                                                        | 0.310                          | 2017.10            | 624.48             | 0.261                          | 1681.75            | 438.22             |
| A_68_P28170157 | chr11:118109191-118109235                         | NM_001112699:694        | Cyth1         | INSIDE                 | 0.842                                                        | 0.470                          | 2414.59            | 1133.78            | 0.395                          | 1843.68            | 728.50             |
| A_68_P25015865 | chr7:27951492-27951536                            | NM_053208:307           | Egln2         | INSIDE                 | 0.842                                                        | 0.722                          | 2223.61            | 1606.29            | 0.609                          | 1773.09            | 1078.93            |
| A_68_P25828057 | chr8:46122480-46122524                            | NM_001081286:86941      | Fat1          | INSIDE                 | 0.842                                                        | 2.290                          | 1495.56            | 3424.15            | 1.927                          | 1163.48            | 2241.65            |
| A_68_P24009123 | chr5:115791151-115791195                          | NM_029645:-2            | Gatc          | DIVERGENT_PROMOTER     | 0.842                                                        | 0.443                          | 1174.32            | 520.54             | 0.373                          | 950.29             | 354.82             |
| A_68_P27790975 | chr11:50673295-50673343                           | NM_173372:9132          | Grm6          | INSIDE                 | 0.842                                                        | 2.803                          | 2362.89            | 6623.81            | 2.361                          | 1723.20            | 4068.20            |
| A_68_P25022015 | chr7:29243791-29243835                            | NM_001141921:6556       | Lrfn1         | INSIDE                 | 0.842                                                        | 2.349                          | 901.80             | 2118.36            | 1.978                          | 696.70             | 1378.32            |
| A_68_P22659607 | chr3:153568738-153568782                          | NM_031870:342           | Msh4          | INSIDE                 | 0.842                                                        | 2.678                          | 1040.93            | 2787.60            | 2.255                          | 853.02             | 1923.64            |
| A_68_P26789125 | chr9:103905125-103905169                          | NM_172460:273           | Nphp3         | INSIDE                 | 0.842                                                        | 0.620                          | 2069.66            | 1282.76            | 0.522                          | 1503.92            | 784.49             |
| A_68_P29773664 | chr14:84847873-84847917                           | NM_001013753:4525       | Pcdh17        | INSIDE                 | 0.842                                                        | 0.609                          | 1262.16            | 768.49             | 0.513                          | 954.01             | 489.04             |
| A_68_P30423730 | chr15:89010897-89010941                           | NM_001159521:-6638      | Plknb2        | PROMOTER               | 0.842                                                        | 2.007                          | 1075.11            | 2158.17            | 1.690                          | 771.87             | 1304.10            |
| A_68_P27899678 | chr11:70053293-70053337                           | NM_173742:40            | Rnasek        | INSIDE                 | 0.842                                                        | 0.548                          | 1113.42            | 610.43             | 0.461                          | 1061.30            | 489.73             |
| A_68_P28554952 | chr12:77707425-77707469                           | NM_013675:104088        | Spnb1         | INSIDE                 | 0.842                                                        | 3.208                          | 1040.29            | 3336.90            | 2.702                          | 880.95             | 2380.71            |
| A_68_P27355933 | chr10:93296604-93296648                           | NM_183199:2327          | Usp44         | INSIDE                 | 0.842                                                        | 0.495                          | 2735.13            | 1352.72            | 0.417                          | 2373.21            | 988.57             |
| A_68_P29478597 | chr14:26427163-26427207                           | NM_183208:148514        | Zmiz1         | INSIDE                 | 0.842                                                        | 2.052                          | 639.13             | 1311.76            | 1.729                          | 636.65             | 1100.50            |
| A_68_P20878145 | chr1:182780796-182780840                          | NM_145943:-463          | BC031781      | PROMOTER               | 0.841                                                        | 0.417                          | 1415.75            | 590.85             | 0.351                          | 1148.27            | 402.97             |
| A_68_P30589271 | chr16:20732979-20733023                           | NM_009893:-199          | Chrd          | DIVERGENT_PROMOTER     | 0.841                                                        | 0.572                          | 1229.58            | 703.86             | 0.481                          | 1050.85            | 505.84             |
| A_68_P23309920 | chr4:131604337-131604381                          | NM_001128606:635        | Epb4.1        | INSIDE                 | 0.841                                                        | 0.384                          | 1988.56            | 764.59             | 0.323                          | 1544.96            | 499.28             |



| ProbeName      | Target position of probe on CpG island microarray | TargetID            | GeneSymbol    | CpG island Description | Ratio of relative methylation (TiO <sub>2</sub> -NP/Vehicle) | Sham group                     |                    |                    | TiO <sub>2</sub> -H group      |                    |                    |
|----------------|---------------------------------------------------|---------------------|---------------|------------------------|--------------------------------------------------------------|--------------------------------|--------------------|--------------------|--------------------------------|--------------------|--------------------|
|                |                                                   |                     |               |                        |                                                              | Relative methylation (Cy5/Cy3) | Cy3 signal (Input) | Cy5 signal (MeDIP) | Relative methylation (Cy5/Cy3) | Cy3 signal (Input) | Cy5 signal (MeDIP) |
| A_68_P27542235 | chr10:128027332-128027376                         | NM_010153:-797      | ErbB3         | PROMOTER               | 0.841                                                        | 0.622                          | 954.63             | 593.98             | 0.523                          | 833.52             | 436.03             |
| A_68_P23979254 | chr5:110792817-110792861                          | NM_028596:23308     | Fbrs1         | INSIDE                 | 0.841                                                        | 2.338                          | 709.52             | 1658.95            | 1.966                          | 628.71             | 1236.14            |
| A_68_P28044104 | chr11:96227502-96227546                           | NM_008266:453       | Hoxb1         | INSIDE                 | 0.841                                                        | 0.745                          | 3022.97            | 2252.46            | 0.626                          | 2255.98            | 1413.11            |
| A_68_P24051800 | chr5:123157735-123157779                          | NM_011026:191       | P2rx4         | INSIDE                 | 0.841                                                        | 0.484                          | 1104.25            | 534.23             | 0.407                          | 1003.83            | 408.21             |
| A_68_P24820336 | chr6:125330635-125330679                          | NM_198604:-134      | Plekhh6       | PROMOTER               | 0.841                                                        | 0.637                          | 1638.21            | 1043.27            | 0.535                          | 1210.62            | 648.09             |
| A_68_P25361265 | chr7:106497731-106497775                          | NM_001111043:3997   | Serpinh1      | INSIDE                 | 0.841                                                        | 2.368                          | 338.34             | 801.29             | 1.992                          | 337.33             | 671.87             |
| A_68_P31142305 | chr17:31991956-31992000                           | NM_010831:759       | Sik1          | INSIDE                 | 0.841                                                        | 0.560                          | 1794.67            | 1005.78            | 0.471                          | 1359.62            | 640.97             |
| A_68_P22149791 | chr3:54590206-54590250                            | NM_019483:30725     | Smad9         | INSIDE                 | 0.841                                                        | 2.986                          | 592.83             | 1770.20            | 2.513                          | 464.02             | 1165.92            |
| A_68_P21900705 | chr2:179710112-179710156                          | NM_001081092:1217   | Taf4a         | INSIDE                 | 0.841                                                        | 0.612                          | 1104.19            | 676.22             | 0.515                          | 1024.62            | 527.83             |
| A_68_P32143398 | chr19:46423369-46423413                           | NM_029186:-7979     | Tmem180       | PROMOTER               | 0.841                                                        | 0.681                          | 1202.77            | 819.04             | 0.573                          | 1066.21            | 610.71             |
| A_68_P31092445 | chr17:23713641-23713685                           | NM_011747:22792     | Zfp13         | INSIDE                 | 0.841                                                        | 2.003                          | 3237.70            | 6483.62            | 1.683                          | 2222.09            | 3740.30            |
| A_68_P23577043 | chr5:31502922-31502966                            | NM_001177901:1471   | Zfp513        | INSIDE                 | 0.841                                                        | 1.794                          | 2833.42            | 5084.28            | 1.510                          | 2127.60            | 3211.95            |
| A_68_P21075529 | chr2:25838219-25838263                            | NM_001115076:562    | Camsap1       | INSIDE                 | 0.840                                                        | 0.349                          | 2459.48            | 857.50             | 0.293                          | 1757.85            | 514.98             |
| A_68_P31259561 | chr17:57151014-57151058                           | NM_133801:-325      | Gtf2f1        | PROMOTER               | 0.840                                                        | 0.596                          | 890.11             | 530.47             | 0.501                          | 710.78             | 355.84             |
| A_68_P21061711 | chr2:23011327-23011371                            | NM_025979:196       | Mastl         | INSIDE                 | 0.840                                                        | 0.541                          | 2425.39            | 1312.03            | 0.455                          | 1981.07            | 900.55             |
| A_68_P23029299 | chr4:76096333-76096377                            | NM_011211:143849    | Ptptrd        | INSIDE                 | 0.840                                                        | 1.835                          | 2360.85            | 4331.46            | 1.542                          | 1943.50            | 2996.46            |
| A_68_P32222444 | chr19:60019679-60019723                           | NM_001164367:-143   | Rab11fip2     | PROMOTER               | 0.840                                                        | 0.696                          | 2582.40            | 1796.74            | 0.584                          | 1964.00            | 1147.72            |
| A_68_P32785478 | chrX:158155051-158155095                          | NM_198409:-412      | Rai2          | PROMOTER               | 0.840                                                        | 1.904                          | 3649.39            | 6949.06            | 1.600                          | 1784.25            | 2854.18            |
| A_68_P23344732 | chr4:137806580-137806624                          | NM_001099631:277    | Sh2d5         | INSIDE                 | 0.840                                                        | 0.645                          | 1589.00            | 1024.64            | 0.542                          | 1208.23            | 654.45             |
| A_68_P30094471 | chr15:27703578-27703623                           | NM_001081302:252003 | Trio          | INSIDE                 | 0.840                                                        | 1.858                          | 1192.90            | 2216.32            | 1.561                          | 943.03             | 1471.60            |
| A_68_P29520332 | chr14:33670216-33670260                           | NM_178791:297       | E130203B14Rik | INSIDE                 | 0.839                                                        | 0.711                          | 1730.52            | 1230.86            | 0.597                          | 1390.75            | 830.25             |
| A_68_P20294249 | chr1:64782318-64782364                            | NM_001042659:1984   | Fzd5          | INSIDE                 | 0.839                                                        | 5.371                          | 1979.74            | 10632.29           | 4.503                          | 1388.87            | 6254.72            |
| A_68_P24828616 | chr6:126689917-126689961                          | NM_013568:754       | Kena6         | INSIDE                 | 0.839                                                        | 0.557                          | 1358.83            | 757.31             | 0.468                          | 1052.09            | 492.13             |
| A_68_P23981083 | chr5:111082064-111082108                          | NM_153570:315       | Noe4l         | INSIDE                 | 0.839                                                        | 0.479                          | 1293.22            | 619.38             | 0.402                          | 1024.15            | 411.38             |
| A_68_P28538088 | chr12:74646850-74646894                           | NM_178715:510       | Tmem30b       | INSIDE                 | 0.839                                                        | 0.725                          | 1678.50            | 1217.50            | 0.609                          | 1581.41            | 962.87             |
| A_68_P30094308 | chr15:27677507-27677551                           | NM_001081302:278075 | Trio          | INSIDE                 | 0.839                                                        | 3.245                          | 2551.20            | 8278.08            | 2.724                          | 1764.09            | 4804.83            |
| A_68_P29246777 | chr13:97312887-97312931                           | NM_001164222:219    | Col4a3bp      | INSIDE                 | 0.838                                                        | 0.504                          | 2272.10            | 1144.97            | 0.422                          | 1892.11            | 798.92             |
| A_68_P25436573 | chr7:121706377-121706421                          | NM_177382:88        | Cyp2r1        | INSIDE                 | 0.838                                                        | 2.920                          | 922.45             | 2693.46            | 2.448                          | 781.30             | 1912.52            |
| A_68_P28067418 | chr11:100181178-100181222                         | NM_011508:-109      | Eif1          | PROMOTER               | 0.838                                                        | 0.437                          | 2243.97            | 979.77             | 0.366                          | 1773.19            | 648.95             |
| A_68_P20562790 | chr11:122503715-122503759                         | NM_010133:4673      | En1           | INSIDE                 | 0.838                                                        | 0.610                          | 941.65             | 574.80             | 0.511                          | 755.26             | 386.30             |
| A_68_P23317854 | chr4:133042232-133042276                          | NM_175307:6207      | Fam46b        | INSIDE                 | 0.838                                                        | 2.113                          | 1133.72            | 2395.88            | 1.771                          | 862.68             | 1527.71            |
| A_68_P25361474 | chr7:106529779-106529823                          | NM_201352:-258      | Gdpd5         | PROMOTER               | 0.838                                                        | 0.368                          | 2189.56            | 804.77             | 0.308                          | 1655.63            | 509.86             |
| A_68_P23080771 | chr4:86257888-86257932                            | NM_173400:16        | Haus6         | INSIDE                 | 0.838                                                        | 0.600                          | 2512.77            | 1507.68            | 0.503                          | 2060.10            | 1035.95            |
| A_68_P20457528 | chr1:95700326-95700370                            | NM_025454:-193      | Ing5          | DIVERGENT_PROMOTER     | 0.838                                                        | 0.531                          | 2125.75            | 1127.76            | 0.445                          | 1702.19            | 756.96             |
| A_68_P24385096 | chr6:39760909-39760954                            | NM_001010930:4      | Mrps33        | INSIDE                 | 0.838                                                        | 0.666                          | 1232.22            | 820.19             | 0.558                          | 995.78             | 555.31             |
| A_68_P21873559 | chr2:173946554-173946598                          | NM_213733:10725     | Npepl1        | INSIDE                 | 0.838                                                        | 2.223                          | 1230.40            | 2735.09            | 1.862                          | 956.97             | 1782.12            |
| A_68_P27896914 | chr11:69572502-69572546                           | NM_009089:-799      | Polr2a        | PROMOTER               | 0.838                                                        | 0.448                          | 1435.65            | 643.67             | 0.376                          | 1141.82            | 428.92             |
| A_68_P23437243 | chr4:154597315-154597359                          | NM_011385:-692      | Ski           | PROMOTER               | 0.838                                                        | 0.488                          | 1637.15            | 799.35             | 0.409                          | 1335.08            | 546.54             |
| A_68_P32203281 | chr19:56900903-56900947                           | NM_001002241:-4277  | Tdrd1         | PROMOTER               | 0.838                                                        | 3.575                          | 1541.92            | 5511.63            | 2.994                          | 1335.27            | 3998.16            |
| A_68_P25182465 | chr7:72515444-72515488                            | NM_001163574:664    | Tjp1          | INSIDE                 | 0.838                                                        | 0.451                          | 1199.80            | 541.71             | 0.378                          | 1127.36            | 426.68             |
| A_68_P26924748 | chr10:8238264-8238308                             | NM_177387:337       | Ust           | INSIDE                 | 0.838                                                        | 0.628                          | 1818.21            | 1141.89            | 0.526                          | 1446.51            | 761.02             |
| A_68_P24127577 | chr5:138229403-138229447                          | NM_001005426:395    | Zewpw1        | INSIDE                 | 0.838                                                        | 4.658                          | 4961.26            | 23107.48           | 3.903                          | 3308.65            | 12912.46           |
| A_68_P20433092 | chr1:91838560-91838604                            | AK081208:9752       |               | DOWNSTREAM             | 0.838                                                        | 0.615                          | 1137.59            | 699.34             | 0.515                          | 913.29             | 470.42             |
| A_68_P29964256 | chr14:123312237-123312281                         | NM_145466:129       | A2ld1         | INSIDE                 | 0.837                                                        | 0.580                          | 1247.69            | 724.09             | 0.486                          | 1032.87            | 501.90             |
| A_68_P26749714 | chr9:96789401-96789445                            | NM_153420:419       | Acp12         | INSIDE                 | 0.837                                                        | 1.598                          | 11400.84           | 18215.34           | 1.337                          | 7753.75            | 10365.61           |
| A_68_P27937765 | chr11:77285191-77285236                           | NM_172945:17967     | Ankrd13b      | INSIDE                 | 0.837                                                        | 2.437                          | 986.70             | 2404.69            | 2.039                          | 746.09             | 1521.07            |
| A_68_P30379098 | chr15:81524468-81524512                           | NM_001164320:3227   | Chadl         | INSIDE                 | 0.837                                                        | 1.903                          | 931.17             | 1772.17            | 1.593                          | 849.19             | 1353.18            |
| A_68_P25539016 | chr7:140315036-140315089                          | NM_009980:104       | Ctbp2         | INSIDE                 | 0.837                                                        | 6.739                          | 8489.67            | 57208.31           | 5.643                          | 5766.75            | 32541.26           |
| A_68_P24157331 | chr5:144383673-144383717                          | NM_011182:379       | Cyth3         | INSIDE                 | 0.837                                                        | 0.619                          | 2940.81            | 1820.75            | 0.518                          | 2421.05            | 1254.35            |
| A_68_P22046078 | chr3:33980177-33980221                            | NM_001026211:50     | Dnajc19       | INSIDE                 | 0.837                                                        | 2.294                          | 1818.87            | 4171.60            | 1.919                          | 1822.02            | 3496.11            |
| A_68_P26022687 | chr8:87447829-87447873                            | NM_019945:13402     | Mast1         | INSIDE                 | 0.837                                                        | 3.366                          | 2594.52            | 8733.19            | 2.819                          | 2070.38            | 5835.84            |

| ProbeName      | Target position of probe on CpG island microarray | TargetID                | GeneSymbol    | CpG island Description | Ratio of relative methylation (TiO <sub>2</sub> -NP/Vehicle) | Sham group                     |                    |                    | TiO <sub>2</sub> -H group      |                    |                    |
|----------------|---------------------------------------------------|-------------------------|---------------|------------------------|--------------------------------------------------------------|--------------------------------|--------------------|--------------------|--------------------------------|--------------------|--------------------|
|                |                                                   |                         |               |                        |                                                              | Relative methylation (Cy5/Cy3) | Cy3 signal (Input) | Cy5 signal (MeDIP) | Relative methylation (Cy5/Cy3) | Cy3 signal (Input) | Cy5 signal (MeDIP) |
| A_68_P25360755 | chr7:106417510-106417554                          | NM_001043355:677        | Mtap6         | INSIDE                 | 0.837                                                        | 0.628                          | 1611.00            | 1012.14            | 0.526                          | 1275.96            | 670.76             |
| A_68_P25503619 | chr7:134164872-134164916                          | NM_001102563:-169       | Prrt2         | PROMOTER               | 0.837                                                        | 0.674                          | 1980.82            | 1334.45            | 0.564                          | 1623.20            | 914.93             |
| A_68_P30470421 | chr15:97535782-97535826                           | NM_028003:449           | Rpap3         | INSIDE                 | 0.837                                                        | 0.532                          | 2592.71            | 1379.78            | 0.445                          | 2129.83            | 948.57             |
| A_68_P23929477 | chr5:100845100-100845144                          | NM_026969:131           | Sec31a        | INSIDE                 | 0.837                                                        | 0.639                          | 4753.27            | 3036.33            | 0.535                          | 3834.12            | 2051.00            |
| A_68_P31421198 | chr17:87506616-87506660                           | NM_019654:-380          | Soes5         | PROMOTER               | 0.837                                                        | 0.623                          | 2025.63            | 1262.46            | 0.522                          | 1551.06            | 808.92             |
| A_68_P26752039 | chr9:97266104-97266148                            | NM_030219:4251          | Trim42        | INSIDE                 | 0.837                                                        | 1.713                          | 1266.56            | 2169.73            | 1.435                          | 936.30             | 1343.28            |
| A_68_P29064231 | chr13:56989096-56989140                           | NM_012035:7831          | Trpc7         | INSIDE                 | 0.837                                                        | 2.003                          | 1397.94            | 2800.23            | 1.677                          | 1109.71            | 1861.38            |
| A_68_P24019922 | chr5:117769425-117769469                          | NM_001033311:172        | Vsig10        | INSIDE                 | 0.837                                                        | 0.555                          | 1269.90            | 704.89             | 0.465                          | 1017.03            | 472.71             |
| A_68_P22611705 | chr3:145601523-145601567                          | NM_025555:549           | 2410004B18Rik | INSIDE                 | 0.836                                                        | 2.090                          | 1694.76            | 3542.55            | 1.748                          | 1502.16            | 2625.09            |
| A_68_P20433237 | chr1:91865288-91865332                            | NM_139152:45842         | Asb18         | INSIDE                 | 0.836                                                        | 0.614                          | 910.98             | 559.70             | 0.514                          | 932.09             | 478.75             |
| A_68_P21633703 | chr2:131005234-131005278                          | NM_007682:492           | Cenpb         | INSIDE                 | 0.836                                                        | 0.697                          | 1407.97            | 981.77             | 0.583                          | 1260.68            | 734.53             |
| A_68_P30978140 | chr16:93884209-93884253                           | NM_028083:85            | Chaf1b        | INSIDE                 | 0.836                                                        | 0.602                          | 1468.67            | 884.33             | 0.503                          | 1235.04            | 621.58             |
| A_68_P23618838 | chr5:38710862-38710906                            | NM_013503:137           | Drd5          | INSIDE                 | 0.836                                                        | 0.703                          | 2326.95            | 1635.08            | 0.587                          | 1805.55            | 1060.21            |
| A_68_P27278710 | chr10:79217823-79217867                           | NM_023304:-19           | Fgf22         | DIVERGENT_PROMOTER     | 0.836                                                        | 0.643                          | 1437.69            | 924.45             | 0.537                          | 1366.73            | 734.30             |
| A_68_P27093479 | chr10:41916731-41916775                           | NM_019740:79796         | Foxo3         | INSIDE                 | 0.836                                                        | 2.428                          | 504.00             | 1223.79            | 2.029                          | 451.40             | 915.92             |
| A_68_P24005877 | chr5:115199469-115199513                          | NM_001077360:24010      | Git2          | INSIDE                 | 0.836                                                        | 2.405                          | 404.42             | 972.47             | 2.010                          | 359.96             | 723.56             |
| A_68_P26954156 | chr10:13685876-13685920                           | NM_010437:-286          | Hivep2        | PROMOTER               | 0.836                                                        | 1.896                          | 3028.80            | 5742.48            | 1.585                          | 2118.13            | 3357.01            |
| A_68_P25022018 | chr7:29244235-29244279                            | NM_001141921:7000       | Lrfn1         | INSIDE                 | 0.836                                                        | 2.015                          | 853.81             | 1720.63            | 1.685                          | 740.35             | 1247.82            |
| A_68_P25087548 | chr7:51717376-51717420                            | NM_198250:19542         | Lrre4b        | INSIDE                 | 0.836                                                        | 2.820                          | 1178.24            | 3322.97            | 2.359                          | 879.94             | 2075.36            |
| A_68_P26021274 | chr8:87229387-87229431                            | NM_008535:4053          | Lyl1          | DOWNSTREAM             | 0.836                                                        | 2.345                          | 9842.90            | 23077.43           | 1.960                          | 7106.69            | 13926.16           |
| A_68_P24064309 | chr5:125507455-125507499                          | NM_011424:152108        | Ncor2         | INSIDE                 | 0.836                                                        | 2.509                          | 502.10             | 1259.66            | 2.097                          | 396.57             | 831.62             |
| A_68_P26261060 | chr8:129588304-129588348                          | NM_001122850:371        | Pard3         | INSIDE                 | 0.836                                                        | 0.632                          | 1077.90            | 681.60             | 0.529                          | 900.13             | 475.94             |
| A_68_P29145568 | chr13:74454823-74454867                           | NM_011051:-70           | Pded6         | PROMOTER               | 0.836                                                        | 0.723                          | 3217.51            | 2326.04            | 0.605                          | 2497.81            | 1510.14            |
| A_68_P23292758 | chr4:128405111-128405155                          | NM_001195083:318        | Phc2          | INSIDE                 | 0.836                                                        | 2.392                          | 394.41             | 943.34             | 2.001                          | 383.35             | 766.92             |
| A_68_P30346557 | chr15:76004653-76004697                           | NM_201394:21466         | Plec          | INSIDE                 | 0.836                                                        | 2.787                          | 381.91             | 1064.37            | 2.330                          | 394.28             | 918.64             |
| A_68_P26349532 | chr9:21722448-21722492                            | NM_031874:95            | Rab3d         | INSIDE                 | 0.836                                                        | 0.634                          | 3431.03            | 2173.89            | 0.530                          | 2699.16            | 1429.24            |
| A_68_P28086207 | chr11:103510830-103510874                         | NM_001033212:30         | Rprml         | INSIDE                 | 0.836                                                        | 0.424                          | 1471.23            | 623.98             | 0.354                          | 1185.66            | 420.20             |
| A_68_P29599193 | chr4:51551001-51551045                            | NM_001033271:-498       | Tmem55b       | PROMOTER               | 0.836                                                        | 0.498                          | 1214.84            | 604.75             | 0.416                          | 999.90             | 416.29             |
| A_68_P30887977 | chr16:77014158-77014202                           | NM_013918:-133          | Usp25         | PROMOTER               | 0.836                                                        | 2.016                          | 658.76             | 1328.19            | 1.685                          | 731.21             | 1231.86            |
| A_68_P28058999 | chr11:98725426-98725472                           | NM_197940:537           | Wipf2         | INSIDE                 | 0.836                                                        | 4.318                          | 4205.98            | 18161.31           | 3.611                          | 2774.09            | 10018.33           |
| A_68_P24155682 | chr5:144015330-144015374                          | NM_017467:16349         | Zfp316        | INSIDE                 | 0.836                                                        | 2.049                          | 1156.56            | 2370.00            | 1.714                          | 932.25             | 1597.53            |
| A_68_P30084545 | chr15:25914824-25914868                           | NM_144523:726           | Zfp622        | INSIDE                 | 0.836                                                        | 2.153                          | 1354.77            | 2917.03            | 1.800                          | 967.60             | 1741.30            |
| A_68_P31922425 | chr19:4305540-4305585                             | NM_130863:393           | Adrbk1        | INSIDE                 | 0.835                                                        | 0.684                          | 2844.94            | 1947.04            | 0.572                          | 2418.39            | 1382.82            |
| A_68_P31097729 | chr17:24642452-24642496                           | NM_027937:16747         | Caskin1       | INSIDE                 | 0.835                                                        | 2.324                          | 907.65             | 2109.59            | 1.942                          | 720.26             | 1398.49            |
| A_68_P25026494 | chr7:30092897-30092941                            | NM_013874:3895          | Dpf1          | INSIDE                 | 0.835                                                        | 0.674                          | 1321.46            | 890.83             | 0.563                          | 1020.19            | 574.53             |
| A_68_P28204869 | chr12:5216958-5217002                             | NM_001164493:165508     | Klhl29        | INSIDE                 | 0.835                                                        | 2.049                          | 1012.42            | 2074.75            | 1.710                          | 830.51             | 1420.58            |
| A_68_P24947884 | chr7:4089157-4089201                              | NM_172736:521           | Leng8         | INSIDE                 | 0.835                                                        | 0.497                          | 1320.42            | 655.99             | 0.415                          | 1177.59            | 488.29             |
| A_68_P27285756 | chr10:80297241-80297285                           | NM_001013758:9522       | Lingo3        | INSIDE                 | 0.835                                                        | 2.009                          | 1234.22            | 2480.15            | 1.678                          | 904.42             | 1517.45            |
| A_68_P21722816 | chr2:147019569-147019613                          | NM_001077632:-7452      | Nkx2-2        | PROMOTER               | 0.835                                                        | 0.307                          | 1700.90            | 521.85             | 0.256                          | 1333.91            | 341.63             |
| A_68_P23807627 | chr5:75549167-75549211                            | NM_001083316:-3002      | Pdgfra        | PROMOTER               | 0.835                                                        | 0.478                          | 1569.50            | 750.41             | 0.399                          | 1201.05            | 479.50             |
| A_68_P32117862 | chr19:41986317-41986361                           | NM_023418:-22           | Pgam1         | PROMOTER               | 0.835                                                        | 0.712                          | 1393.00            | 991.48             | 0.594                          | 1161.05            | 689.95             |
| A_68_P22880596 | chr4:45024872-45024916                            | NM_001163283:390        | Zbtb5         | INSIDE                 | 0.835                                                        | 0.718                          | 2651.71            | 1902.85            | 0.599                          | 2149.08            | 1287.38            |
| A_68_P23577057 | chr5:31504483-31504527                            | NM_001177901:-89        | Zfp513        | PROMOTER               | 0.835                                                        | 0.674                          | 1362.30            | 918.19             | 0.563                          | 1091.28            | 613.92             |
| A_68_P23593508 | chr5:34631202-34631246                            | NM_001015039:-251       | Zfyve28       | PROMOTER               | 0.835                                                        | 0.475                          | 1207.31            | 685.78             | 0.474                          | 1209.81            | 573.74             |
| A_68_P27283449 | chr10:79938176-79938220                           | ENSMUST00000158603:-898 |               | PROMOTER               | 0.835                                                        | 0.532                          | 1044.95            | 556.06             | 0.444                          | 896.94             | 398.50             |
| A_68_P30339170 | chr15:74551517-74551561                           | NM_198607:-125          | 4930572J05Rik | PROMOTER               | 0.834                                                        | 0.701                          | 1296.07            | 908.61             | 0.585                          | 1094.67            | 639.91             |
| A_68_P20774314 | chr1:163806929-163806973                          | NM_172645:-158          | A1848100      | PROMOTER               | 0.834                                                        | 0.536                          | 2342.79            | 1255.42            | 0.447                          | 1860.48            | 831.85             |
| A_68_P28032141 | chr11:94189750-94189794                           | NM_146024:458           | Ankrd40       | INSIDE                 | 0.834                                                        | 0.435                          | 1618.14            | 704.48             | 0.363                          | 1384.50            | 502.81             |
| A_68_P21310282 | chr2:69485168-69485213                            | NM_028284:-121          | Bbs5          | PROMOTER               | 0.834                                                        | 0.679                          | 1071.59            | 727.56             | 0.566                          | 924.54             | 523.36             |
| A_68_P32128060 | chr19:43764426-43764470                           | NM_053103:270           | Entpd7        | INSIDE                 | 0.834                                                        | 0.652                          | 1718.37            | 1120.87            | 0.544                          | 1306.44            | 710.99             |
| A_68_P21115868 | chr2:32391385-32391429                            | NM_153560:528           | Fam102a       | INSIDE                 | 0.834                                                        | 0.524                          | 1876.38            | 983.65             | 0.437                          | 1506.60            | 658.52             |

| ProbeName      | Target position of probe on CpG island microarray | TargetID                | GeneSymbol | CpG island Description | Ratio of relative methylation (TiO <sub>2</sub> -NP/Vehicle) | Sham group                     |                    |                    | TiO <sub>2</sub> -H group      |                    |                    |
|----------------|---------------------------------------------------|-------------------------|------------|------------------------|--------------------------------------------------------------|--------------------------------|--------------------|--------------------|--------------------------------|--------------------|--------------------|
|                |                                                   |                         |            |                        |                                                              | Relative methylation (Cy5/Cy3) | Cy3 signal (Input) | Cy5 signal (MeDIP) | Relative methylation (Cy5/Cy3) | Cy3 signal (Input) | Cy5 signal (MeDIP) |
| A_68_P32408601 | chrX:56388072-56388116                            | NM_010200:-481          | Fgf13      | PROMOTER               | 0.834                                                        | 2.220                          | 1596.46            | 3544.25            | 1.852                          | 781.17             | 1446.65            |
| A_68_P28813934 | chr13:8995156-8995200                             | NM_027000:80            | Gtbp4      | INSIDE                 | 0.834                                                        | 0.639                          | 1998.13            | 1277.53            | 0.533                          | 1558.88            | 831.46             |
| A_68_P25656260 | chr8:11561678-11561724                            | NM_011919:5635          | Ing1       | INSIDE                 | 0.834                                                        | 3.371                          | 1852.46            | 6245.36            | 2.811                          | 1241.89            | 3491.15            |
| A_68_P25048199 | chr7:35988939-35988987                            | NM_001024707:11402      | Lrp3       | INSIDE                 | 0.834                                                        | 2.822                          | 582.63             | 1644.04            | 2.354                          | 479.44             | 1128.41            |
| A_68_P31601523 | chr18:32323206-32323251                           | NM_011946:486           | Map3k2     | INSIDE                 | 0.834                                                        | 0.580                          | 1139.82            | 661.35             | 0.484                          | 988.27             | 478.47             |
| A_68_P21906901 | chr2:180627963-180628007                          | NR_029538:-760          | Mir124a-3  | PROMOTER               | 0.834                                                        | 0.665                          | 2614.41            | 1738.89            | 0.554                          | 2404.10            | 1332.97            |
| A_68_P30458577 | chr15:95358659-95358703                           | NM_016743:457           | Nel2       | INSIDE                 | 0.834                                                        | 0.534                          | 1125.38            | 600.62             | 0.445                          | 975.99             | 434.60             |
| A_68_P28445680 | chr12:55170082-55170135                           | NM_013780:820445        | Npas3      | INSIDE                 | 0.834                                                        | 2.025                          | 708.40             | 1434.71            | 1.689                          | 510.88             | 863.10             |
| A_68_P25169316 | chr7:69609111-69609155                            | NM_013788:264           | Peg12      | INSIDE                 | 0.834                                                        | 2.337                          | 808.77             | 1890.06            | 1.948                          | 810.55             | 1579.08            |
| A_68_P26727062 | chr9:92436930-92436974                            | NM_001142916:-108       | Plod2      | PROMOTER               | 0.834                                                        | 0.691                          | 3076.45            | 2124.97            | 0.576                          | 2330.63            | 1343.10            |
| A_68_P24338425 | chr6:31500974-31501020                            | NM_013723:12941         | Podxl      | INSIDE                 | 0.834                                                        | 2.208                          | 1141.38            | 2519.77            | 1.841                          | 863.76             | 1590.25            |
| A_68_P23374911 | chr4:142984150-142984195                          | NM_031377:-171          | Pramel1    | PROMOTER               | 0.834                                                        | 4.724                          | 1115.23            | 5268.06            | 3.939                          | 731.23             | 2880.57            |
| A_68_P22957026 | chr4:59561660-59561704                            | NM_144904:554           | Rod1       | INSIDE                 | 0.834                                                        | 0.736                          | 6136.42            | 4515.15            | 0.614                          | 5484.20            | 3365.31            |
| A_68_P21707833 | chr2:144381436-144381490                          | NM_019787:-550          | Sec23b     | DIVERGENT_PROMOTER     | 0.834                                                        | 2.599                          | 1620.28            | 4211.75            | 2.168                          | 1298.09            | 2814.63            |
| A_68_P30686668 | chr16:38562990-38563034                           | NM_001205287:86         | Tmem39a    | INSIDE                 | 0.834                                                        | 0.684                          | 1580.42            | 1081.37            | 0.571                          | 1204.71            | 687.37             |
| A_68_P27688945 | chr11:32355498-32355542                           | NM_173784:149           | Ubt2       | INSIDE                 | 0.834                                                        | 0.532                          | 1344.48            | 714.93             | 0.444                          | 1245.06            | 552.47             |
| A_68_P24424842 | chr6:47855282-47855326                            | NM_146175:27751         | Zfp282     | INSIDE                 | 0.834                                                        | 1.802                          | 1940.99            | 3496.80            | 1.503                          | 1511.45            | 2271.30            |
| A_68_P32260340 | chrX:11664828-11664872                            | NM_029510:-7171         | Bcor       | PROMOTER               | 0.833                                                        | 0.631                          | 1291.29            | 814.87             | 0.526                          | 631.69             | 331.98             |
| A_68_P23336494 | chr4:136436600-136436644                          | NM_009777:5470          | C1qb       | INSIDE                 | 0.833                                                        | 2.628                          | 607.59             | 1596.83            | 2.189                          | 476.49             | 1042.82            |
| A_68_P26816890 | chr9:108734418-108734462                          | NM_080437:5790          | Celsr3     | INSIDE                 | 0.833                                                        | 0.690                          | 4015.26            | 2771.34            | 0.575                          | 3004.32            | 1727.62            |
| A_68_P21833673 | chr2:166930335-166930379                          | NM_008420:83943         | Kenb1      | INSIDE                 | 0.833                                                        | 1.977                          | 647.33             | 1279.47            | 1.646                          | 518.74             | 853.82             |
| A_68_P27880945 | chr11:66908117-66908162                           | NM_001099635:16338      | Myh3       | INSIDE                 | 0.833                                                        | 4.082                          | 390.66             | 1594.61            | 3.400                          | 391.80             | 1332.29            |
| A_68_P22774362 | chr4:21612942-21612986                            | NM_001080771:146        | Prdm13     | INSIDE                 | 0.833                                                        | 0.713                          | 1941.38            | 1384.16            | 0.594                          | 1542.59            | 916.34             |
| A_68_P21579354 | chr2:120997006-120997050                          | NM_153387:87            | Tube4      | INSIDE                 | 0.833                                                        | 0.616                          | 944.64             | 581.57             | 0.513                          | 822.10             | 421.44             |
| A_68_P25785791 | chr8:37521054-37521098                            | ENSMUST00000036363:-134 |            | PROMOTER               | 0.833                                                        | 0.637                          | 1849.46            | 1178.02            | 0.531                          | 1435.16            | 761.44             |
| A_68_P32565626 | chrX:98989424-98989468                            | ENSMUST00000151231:-548 |            | DIVERGENT_PROMOTER     | 0.833                                                        | 2.477                          | 663.21             | 1643.11            | 2.063                          | 318.25             | 656.50             |
| A_68_P30337609 | chr15:74348773-74348817                           | NM_174991:2169          | Bai1       | INSIDE                 | 0.832                                                        | 0.491                          | 2356.87            | 1158.04            | 0.409                          | 1852.55            | 757.31             |
| A_68_P30198096 | chr15:48621384-48621428                           | NM_001081391:2129       | Camd3      | INSIDE                 | 0.832                                                        | 0.638                          | 842.60             | 537.26             | 0.530                          | 679.96             | 360.50             |
| A_68_P26804377 | chr9:106553386-106553432                          | NM_001160353:5032       | Grm2       | INSIDE                 | 0.832                                                        | 3.006                          | 499.89             | 1502.52            | 2.501                          | 437.36             | 1093.76            |
| A_68_P31050851 | chr17:12464717-12464771                           | NM_011948:46782         | Map3k4     | INSIDE                 | 0.832                                                        | 2.888                          | 460.37             | 1329.55            | 2.404                          | 363.23             | 873.21             |
| A_68_P21490976 | chr2:104656612-104656656                          | NM_001123327:219        | Qser1      | INSIDE                 | 0.832                                                        | 0.514                          | 1934.05            | 993.54             | 0.427                          | 1560.73            | 667.13             |
| A_68_P26630974 | chr9:72892721-72892765                            | NM_023635:71            | Rab27a     | INSIDE                 | 0.832                                                        | 0.576                          | 1410.63            | 813.13             | 0.479                          | 1177.57            | 564.61             |
| A_68_P22900935 | chr4:48597734-48597778                            | NM_021436:-308          | Tmeff1     | PROMOTER               | 0.832                                                        | 0.656                          | 1416.20            | 929.54             | 0.546                          | 1108.38            | 605.63             |
| A_68_P22313147 | chr3:88137223-88137267                            | NM_024246:1111          | Tmem79     | INSIDE                 | 0.832                                                        | 4.222                          | 647.69             | 2734.50            | 3.514                          | 466.87             | 1640.82            |
| A_68_P24005309 | chr5:115108492-115108536                          | NM_022017:-84           | Trpv4      | PROMOTER               | 0.832                                                        | 0.610                          | 1417.60            | 864.84             | 0.507                          | 1298.06            | 658.75             |
| A_68_P30422258 | chr15:88785483-88785529                           | NM_172818:-658          | Till8      | PROMOTER               | 0.832                                                        | 1.941                          | 1723.59            | 3345.69            | 1.615                          | 1330.56            | 2148.45            |
| A_68_P23586715 | chr5:33361518-33361562                            | NM_011738:76            | Ywhah      | INSIDE                 | 0.832                                                        | 2.596                          | 527.49             | 1369.50            | 2.159                          | 559.05             | 1207.22            |
| A_68_P30718917 | chr16:43980124-43980168                           | NM_001007460:-983       | Zdhc23     | PROMOTER               | 0.832                                                        | 1.942                          | 519.96             | 1009.58            | 1.615                          | 512.95             | 828.65             |
| A_68_P25372489 | chr7:108450404-108450448                          | NM_001111111:176        | Atg16l2    | INSIDE                 | 0.831                                                        | 0.620                          | 965.64             | 598.30             | 0.515                          | 848.32             | 436.64             |
| A_68_P23281850 | chr4:126430722-126430766                          | NM_001035525:-54        | AU040320   | DIVERGENT_PROMOTER     | 0.831                                                        | 0.619                          | 1124.53            | 695.96             | 0.514                          | 950.16             | 488.38             |
| A_68_P21617368 | chr2:127952024-127952068                          | NM_009754:273           | Bel2l11    | INSIDE                 | 0.831                                                        | 0.368                          | 1812.74            | 667.93             | 0.306                          | 1235.62            | 378.27             |
| A_68_P20975269 | chr2:5636008-5636052                              | NM_177343:-320          | Camk1d     | PROMOTER               | 0.831                                                        | 0.525                          | 1297.47            | 681.07             | 0.436                          | 1026.33            | 447.84             |
| A_68_P24010912 | chr5:116112718-116112762                          | NM_001080808:68828      | Ccdc64     | INSIDE                 | 0.831                                                        | 2.357                          | 423.45             | 998.19             | 1.958                          | 382.60             | 749.20             |
| A_68_P26554288 | chr9:59450755-59450799                            | NM_175235:24633         | Celf6      | INSIDE                 | 0.831                                                        | 2.229                          | 495.55             | 1104.70            | 1.852                          | 404.11             | 748.57             |
| A_68_P25654578 | chr8:11312336-11312380                            | NM_009931:468           | Col4a1     | INSIDE                 | 0.831                                                        | 0.619                          | 1687.39            | 1044.18            | 0.514                          | 1278.63            | 657.79             |
| A_68_P21603039 | chr2:125331555-125331599                          | NM_007993:598           | Fbn1       | INSIDE                 | 0.831                                                        | 0.613                          | 863.59             | 529.22             | 0.509                          | 710.15             | 361.66             |
| A_68_P22649285 | chr3:151874067-151874111                          | NM_057172:667           | Fubp1      | INSIDE                 | 0.831                                                        | 0.499                          | 1870.83            | 934.26             | 0.415                          | 1419.14            | 589.27             |
| A_68_P29083952 | chr13:60278886-60278930                           | NM_008086:-12           | Gas1       | PROMOTER               | 0.831                                                        | 0.706                          | 2005.48            | 1415.34            | 0.587                          | 1776.31            | 1042.19            |
| A_68_P25361481 | chr7:106530607-106530651                          | NM_201352:570           | Gdpc5      | INSIDE                 | 0.831                                                        | 0.682                          | 1666.57            | 1137.33            | 0.567                          | 1276.94            | 723.83             |
| A_68_P25010079 | chr7:26165188-26165232                            | NM_001039507:9915       | Lipe       | INSIDE                 | 0.831                                                        | 2.240                          | 1581.31            | 3542.75            | 1.862                          | 1160.07            | 2160.43            |
| A_68_P31142265 | chr17:31986788-31986832                           | NM_010831:5927          | Sik1       | INSIDE                 | 0.831                                                        | 2.537                          | 649.81             | 1648.84            | 2.108                          | 413.00             | 870.65             |

| ProbeName      | Target position of probe on CpG island microarray | TargetID                | GeneSymbol    | CpG island Description | Ratio of relative methylation (TiO <sub>2</sub> -NP/Vehicle) | Sham group                     |                    |                    | TiO <sub>2</sub> -H group      |                    |                    |
|----------------|---------------------------------------------------|-------------------------|---------------|------------------------|--------------------------------------------------------------|--------------------------------|--------------------|--------------------|--------------------------------|--------------------|--------------------|
|                |                                                   |                         |               |                        |                                                              | Relative methylation (Cy5/Cy3) | Cy3 signal (Input) | Cy5 signal (MeDIP) | Relative methylation (Cy5/Cy3) | Cy3 signal (Input) | Cy5 signal (MeDIP) |
| A_68_P31155202 | chr17:34809736-34809780                           | NM_031176:2279          | Tnxb          | INSIDE                 | 0.831                                                        | 2.419                          | 1549.30            | 3748.11            | 2.010                          | 1240.71            | 2493.58            |
| A_68_P28813402 | chr13:8870285-8870334                             | NM_172445:-21           | Wdr37         | PROMOTER               | 0.831                                                        | 0.630                          | 928.03             | 584.44             | 0.523                          | 713.09             | 373.02             |
| A_68_P24020116 | chr5:117807608-117807652                          | NM_021539:317           | Wsb2          | INSIDE                 | 0.831                                                        | 1.928                          | 703.28             | 1356.16            | 1.603                          | 673.01             | 1078.99            |
| A_68_P30132825 | chr15:35256447-35256491                           | BC048602:1822           |               | INSIDE                 | 0.831                                                        | 2.556                          | 477.12             | 1219.30            | 2.123                          | 492.32             | 1045.20            |
| A_68_P27571288 | chr11:6963967-6964011                             | NM_009622:497           | Adcy1         | INSIDE                 | 0.830                                                        | 0.588                          | 1061.37            | 623.97             | 0.488                          | 813.31             | 396.69             |
| A_68_P29578141 | chr14:47380448-47380492                           | NM_028222:255           | Cdkn3         | INSIDE                 | 0.830                                                        | 0.425                          | 1282.64            | 545.50             | 0.353                          | 1117.93            | 394.69             |
| A_68_P31493067 | chr18:11054984-11055028                           | NM_010258:2499          | Gata6         | INSIDE                 | 0.830                                                        | 0.508                          | 2117.02            | 1076.38            | 0.422                          | 1700.34            | 717.60             |
| A_68_P29071678 | chr13:58230674-58230718                           | NM_029872:-779          | Hnrnpa0       | PROMOTER               | 0.830                                                        | 0.499                          | 1944.86            | 970.58             | 0.414                          | 1396.62            | 578.44             |
| A_68_P25503741 | chr7:134185905-134185949                          | NM_145588:8             | Kif22         | INSIDE                 | 0.830                                                        | 0.594                          | 1063.83            | 631.90             | 0.493                          | 874.09             | 430.69             |
| A_68_P23615666 | chr5:38208748-38208792                            | NM_010835:7054          | Msx1          | DOWNSTREAM             | 0.830                                                        | 0.539                          | 987.77             | 532.82             | 0.448                          | 782.37             | 350.19             |
| A_68_P25394030 | chr7:112884773-112884817                          | NM_025897:304           | Rrp8          | INSIDE                 | 0.830                                                        | 0.655                          | 1826.48            | 1196.84            | 0.544                          | 1597.32            | 868.74             |
| A_68_P21116392 | chr2:32467870-32467914                            | NM_001025310:5412       | Stgalnac6     | INSIDE                 | 0.830                                                        | 2.381                          | 1443.90            | 3437.73            | 1.977                          | 1054.61            | 2085.19            |
| A_68_P20261296 | chr1:59030751-59030795                            | NM_172656:358           | Stradb        | INSIDE                 | 0.830                                                        | 0.315                          | 1861.15            | 586.90             | 0.262                          | 1580.32            | 413.76             |
| A_68_P31106587 | chr17:25970332-25970376                           | NM_019719:-48           | Stub1         | PROMOTER               | 0.830                                                        | 0.494                          | 1456.73            | 719.43             | 0.410                          | 1026.08            | 420.59             |
| A_68_P32700068 | chrX:137134513-137134557                          | NM_001077364:527        | Tsc22d3       | INSIDE                 | 0.830                                                        | 3.434                          | 10152.40           | 34866.77           | 2.849                          | 4142.57            | 11802.72           |
| A_68_P27926121 | chr11:75259177-75259221                           | NM_138950:9021          | Wdr81         | INSIDE                 | 0.830                                                        | 2.860                          | 1817.91            | 5199.44            | 2.374                          | 1406.09            | 3337.43            |
| A_68_P31166726 | chr17:37139890-37139935                           | NR_033137:-698          | Zfp57         | PROMOTER               | 0.830                                                        | 1.750                          | 5450.29            | 9538.82            | 1.453                          | 3978.80            | 5782.52            |
| A_68_P23226518 | chr4:115570734-115570778                          | ENSMUST00000165938:7486 |               | INSIDE                 | 0.830                                                        | 0.426                          | 1678.02            | 715.16             | 0.354                          | 1251.63            | 442.56             |
| A_68_P32121151 | chr19:42507010-42507054                           | NM_145123:-759          | Crtac1        | PROMOTER               | 0.829                                                        | 0.681                          | 3644.99            | 2481.41            | 0.564                          | 2969.64            | 1675.25            |
| A_68_P23185129 | chr4:106233508-106233552                          | NM_053272:-112          | Dher24        | PROMOTER               | 0.829                                                        | 0.595                          | 3823.78            | 2274.70            | 0.493                          | 3141.11            | 1548.55            |
| A_68_P31329271 | chr17:70865401-70865445                           | NM_001128180:-6027      | Dlgap1        | PROMOTER               | 0.829                                                        | 2.840                          | 1784.23            | 5067.56            | 2.354                          | 1370.05            | 3225.01            |
| A_68_P23335295 | chr4:136249748-136249792                          | NM_010142:142080        | Ephb2         | INSIDE                 | 0.829                                                        | 2.350                          | 1439.96            | 3383.47            | 1.947                          | 1171.93            | 2281.98            |
| A_68_P21874768 | chr2:174156475-174156519                          | NM_001077510:907        | Gnas          | INSIDE                 | 0.829                                                        | 0.627                          | 5082.01            | 3183.94            | 0.519                          | 3811.55            | 1979.83            |
| A_68_P24990866 | chr7:19590929-19590973                            | NM_178757:1537          | Irf2bp1       | INSIDE                 | 0.829                                                        | 1.912                          | 1160.99            | 2219.45            | 1.584                          | 944.37             | 1496.27            |
| A_68_P28834525 | chr13:13683099-13683143                           | NM_010748:445           | Lyst          | INSIDE                 | 0.829                                                        | 0.402                          | 1498.25            | 602.83             | 0.333                          | 1166.06            | 388.73             |
| A_68_P23229427 | chr4:116136423-116136467                          | NM_001042743:344        | Mast2         | INSIDE                 | 0.829                                                        | 2.254                          | 754.76             | 1701.02            | 1.869                          | 729.97             | 1364.56            |
| A_68_P25972609 | chr8:77736900-77736944                            | NM_029182:-920          | Rasd2         | PROMOTER               | 0.829                                                        | 0.607                          | 1270.00            | 770.72             | 0.503                          | 961.34             | 483.77             |
| A_68_P27278808 | chr10:79230093-79230137                           | NR_027505:-428          | Rnf126        | DIVERGENT_PROMOTER     | 0.829                                                        | 0.486                          | 1948.86            | 947.35             | 0.403                          | 1529.51            | 616.10             |
| A_68_P30386712 | chr15:82952941-82952985                           | NM_029101:269           | Rrp7a         | INSIDE                 | 0.829                                                        | 0.613                          | 1122.46            | 687.69             | 0.508                          | 996.88             | 506.45             |
| A_68_P28070585 | chr11:100721516-100721560                         | NM_001164062:-259       | Stat5a        | PROMOTER               | 0.829                                                        | 2.175                          | 624.83             | 1359.20            | 1.803                          | 594.69             | 1072.06            |
| A_68_P27356009 | chr10:93308576-93308623                           | NM_183199:14300         | Usp44         | INSIDE                 | 0.829                                                        | 3.633                          | 412.48             | 1498.74            | 3.011                          | 411.78             | 1239.98            |
| A_68_P22164434 | chr3:57379528-57379572                            | NM_133784:248           | Wvtr1         | INSIDE                 | 0.829                                                        | 0.675                          | 1800.26            | 1215.36            | 0.560                          | 1482.64            | 830.15             |
| A_68_P29703314 | chr14:71166767-71166811                           | NM_023045:-353          | Xpo7          | DIVERGENT_PROMOTER     | 0.829                                                        | 0.661                          | 958.15             | 633.03             | 0.547                          | 847.36             | 463.88             |
| A_68_P22118944 | chr3:49186715-49186759                            |                         |               | Unknown                | 0.829                                                        | 1.930                          | 1943.15            | 3750.65            | 1.600                          | 1557.72            | 2492.21            |
| A_68_P23818499 | chr5:77286360-77286404                            | NM_001163793:16759      | C530008M17Rik | INSIDE                 | 0.828                                                        | 3.015                          | 2264.38            | 6827.67            | 2.497                          | 1496.12            | 3735.72            |
| A_68_P25083571 | chr7:50930445-50930489                            | NM_145582:3066          | Ctu1          | INSIDE                 | 0.828                                                        | 4.649                          | 898.16             | 4175.55            | 3.851                          | 810.04             | 3119.69            |
| A_68_P23600267 | chr5:35740761-35740805                            | NM_010445:9017          | Hmx1          | DOWNSTREAM             | 0.828                                                        | 0.341                          | 1603.41            | 546.62             | 0.282                          | 1197.28            | 338.08             |
| A_68_P21901454 | chr2:179838474-179838518                          | NM_133849:431           | Hrh3          | INSIDE                 | 0.828                                                        | 0.445                          | 1345.15            | 599.01             | 0.369                          | 1118.61            | 412.45             |
| A_68_P21842272 | chr2:168396475-168396519                          | NM_001136073:19195      | Nfiac2        | INSIDE                 | 0.828                                                        | 2.861                          | 3159.20            | 9037.90            | 2.370                          | 2507.05            | 5940.78            |
| A_68_P23354399 | chr4:139377567-139377611                          | NM_011039:11295         | Pax7          | INSIDE                 | 0.828                                                        | 0.463                          | 2494.24            | 1394.72            | 0.364                          | 1864.31            | 863.28             |
| A_68_P25091450 | chr7:52409544-52409588                            | NM_029406:-201          | Pih1d1        | PROMOTER               | 0.828                                                        | 0.673                          | 2825.45            | 1900.65            | 0.557                          | 1866.22            | 1038.85            |
| A_68_P21750311 | chr2:152460303-152460347                          | NM_009047:7581          | Rem1          | INSIDE                 | 0.828                                                        | 2.574                          | 1374.88            | 3538.98            | 2.132                          | 1225.80            | 2613.35            |
| A_68_P25228921 | chr7:80554435-80554479                            | NM_177740:34051         | Rgma          | INSIDE                 | 0.828                                                        | 2.280                          | 3245.69            | 7399.53            | 1.887                          | 2781.12            | 5247.67            |
| A_68_P26023615 | chr8:87604389-87604433                            | NM_026399:235           | Wdr83         | INSIDE                 | 0.828                                                        | 0.683                          | 4115.69            | 2810.43            | 0.565                          | 3139.07            | 1774.40            |
| A_68_P25035565 | chr7:31993563-31993607                            | AK141529:209            |               | INSIDE                 | 0.828                                                        | 0.637                          | 1246.25            | 794.30             | 0.528                          | 946.47             | 499.71             |
| A_68_P31933117 | chr19:6184699-6184743                             | NM_001165919:311        | 1700123I01Rik | INSIDE                 | 0.827                                                        | 3.716                          | 168.06             | 624.46             | 3.074                          | 175.43             | 539.28             |
| A_68_P24994777 | chr7:20282272-20282316                            | NM_009696:2221          | Apoc          | INSIDE                 | 0.827                                                        | 2.187                          | 732.38             | 1601.67            | 1.809                          | 577.31             | 1044.13            |
| A_68_P24004990 | chr5:115060897-115060941                          | NM_001004180:42659      | BC057022      | INSIDE                 | 0.827                                                        | 3.137                          | 1875.72            | 5883.63            | 2.594                          | 1205.40            | 3127.09            |
| A_68_P23361907 | chr4:140616661-140616705                          | NM_001145958:-222       | Crocc         | PROMOTER               | 0.827                                                        | 0.633                          | 1836.39            | 1162.23            | 0.524                          | 1280.16            | 670.39             |
| A_68_P28737553 | chr12:111517859-111517903                         | NM_172119:441           | Dio3          | INSIDE                 | 0.827                                                        | 0.619                          | 1284.72            | 795.49             | 0.512                          | 1198.90            | 614.15             |
| A_68_P29695818 | chr14:69955482-69955526                           | NM_026174:297           | Entpd4        | INSIDE                 | 0.827                                                        | 2.253                          | 1246.07            | 2807.53            | 1.864                          | 1090.53            | 2032.43            |

| ProbeName      | Target position of probe on CpG island microarray | TargetID                 | GeneSymbol    | CpG island Description | Ratio of relative methylation (TiO <sub>2</sub> -NP/Vehicle) | Sham group                     |                    |                    | TiO <sub>2</sub> -H group      |                    |                    |
|----------------|---------------------------------------------------|--------------------------|---------------|------------------------|--------------------------------------------------------------|--------------------------------|--------------------|--------------------|--------------------------------|--------------------|--------------------|
|                |                                                   |                          |               |                        |                                                              | Relative methylation (Cy5/Cy3) | Cy3 signal (Input) | Cy5 signal (MeDIP) | Relative methylation (Cy5/Cy3) | Cy3 signal (Input) | Cy5 signal (MeDIP) |
| A_68_P25828171 | chr8:46136649-46136693                            | NM_001081286:101109      | Fat1          | INSIDE                 | 0.827                                                        | 2.372                          | 1211.51            | 2873.83            | 1.962                          | 938.46             | 1841.67            |
| A_68_P25198318 | chr7:75309835-75309879                            | NM_010513:212714         | Igf1r         | INSIDE                 | 0.827                                                        | 1.939                          | 1005.87            | 1950.49            | 1.603                          | 788.23             | 1263.68            |
| A_68_P31114983 | chr17:27340878-27340922                           | NM_146075:483            | Lem2          | INSIDE                 | 0.827                                                        | 2.006                          | 435.26             | 873.08             | 1.659                          | 468.01             | 776.30             |
| A_68_P25087545 | chr7:51717003-51717047                            | NM_198250:19168          | Lrrc4b        | INSIDE                 | 0.827                                                        | 1.875                          | 852.69             | 1598.54            | 1.551                          | 705.59             | 1094.11            |
| A_68_P31731072 | chr18:56722122-56722166                           | NM_001162989-78          | Phax          | DIVERGENT_PROMOTER     | 0.827                                                        | 0.637                          | 960.63             | 611.67             | 0.527                          | 757.38             | 398.86             |
| A_68_P31862861 | chr18:80389593-80389637                           | NM_199197:7744           | Rbfa          | INSIDE                 | 0.827                                                        | 4.134                          | 769.33             | 3180.71            | 3.417                          | 628.46             | 2147.64            |
| A_68_P30489327 | chr15:100883994-100884038                         | NM_011323:117315         | Scn8a         | DOWNSTREAM             | 0.827                                                        | 3.412                          | 296.51             | 1011.57            | 2.823                          | 316.48             | 893.44             |
| A_68_P31020946 | chr17:6079495-6079539                             | NM_001111017:223         | Serac1        | INSIDE                 | 0.827                                                        | 0.486                          | 2595.49            | 1260.14            | 0.402                          | 1922.38            | 771.91             |
| A_68_P26766660 | chr9:99776718-99776762                            | NM_011440:-151           | Sox14         | PROMOTER               | 0.827                                                        | 0.504                          | 1302.44            | 656.74             | 0.417                          | 1120.07            | 467.29             |
| A_68_P21116281 | chr2:32449587-32449631                            | NM_001025311:-5620       | St6galnac6    | PROMOTER               | 0.827                                                        | 2.726                          | 831.09             | 2265.55            | 2.254                          | 734.49             | 1655.57            |
| A_68_P21092315 | chr2:28496957-28497001                            | NM_022887:216            | Tsc1          | INSIDE                 | 0.827                                                        | 0.711                          | 1778.38            | 1264.33            | 0.588                          | 1489.84            | 875.79             |
| A_68_P31369876 | chr17:78600703-78600747                           | NM_015800:1137           | Crim1         | INSIDE                 | 0.826                                                        | 0.464                          | 1964.46            | 911.11             | 0.383                          | 1599.80            | 612.63             |
| A_68_P20831360 | chr1:174102609-174102653                          | NM_153555:24485          | Deaf8         | INSIDE                 | 0.826                                                        | 3.441                          | 625.86             | 2153.52            | 2.843                          | 584.37             | 1661.30            |
| A_68_P21423682 | chr2:91470084-91470128                            | NM_010168:6465           | F2            | INSIDE                 | 0.826                                                        | 2.118                          | 1072.42            | 2271.42            | 1.750                          | 907.85             | 1589.14            |
| A_68_P30422458 | chr15:88813404-88813448                           | NM_031260:3              | Mov101        | INSIDE                 | 0.826                                                        | 2.012                          | 530.31             | 1066.91            | 1.663                          | 468.51             | 778.93             |
| A_68_P25590418 | chr7:148879577-148879621                          | NM_023566:3338           | Muc2          | INSIDE                 | 0.826                                                        | 2.473                          | 552.39             | 1365.86            | 2.043                          | 482.22             | 985.28             |
| A_68_P26500012 | chr9:49605941-49605986                            | NM_001081445:1211        | Neam1         | INSIDE                 | 0.826                                                        | 0.625                          | 1049.40            | 655.37             | 0.516                          | 791.02             | 407.81             |
| A_68_P22680847 | chr3:157230503-157230547                          | NM_011196:669            | Ptger3        | INSIDE                 | 0.826                                                        | 0.665                          | 882.49             | 586.46             | 0.549                          | 792.51             | 434.77             |
| A_68_P26578200 | chr9:63605412-63605456                            | NM_016769:367            | Smad3         | INSIDE                 | 0.826                                                        | 0.660                          | 1333.86            | 880.00             | 0.545                          | 1038.51            | 566.23             |
| A_68_P27466126 | chr10:114237761-114237805                         | NM_146241:644            | Trhde         | INSIDE                 | 0.826                                                        | 0.710                          | 1484.59            | 1053.78            | 0.586                          | 1252.40            | 734.49             |
| A_68_P20976551 | chr2:5872361-5872405                              | NM_001081132:-132        | Upf2          | DIVERGENT_PROMOTER     | 0.826                                                        | 0.650                          | 1793.21            | 1165.60            | 0.537                          | 1449.56            | 778.71             |
| A_68_P24183689 | chr5:149996098-149996142                          | NM_001013378:-15         | Usp11         | DIVERGENT_PROMOTER     | 0.826                                                        | 2.792                          | 1030.66            | 2877.36            | 2.307                          | 884.23             | 2039.95            |
| A_68_P29493853 | chr14:29318903-29318947                           | NM_009524:266            | Wnt5a         | INSIDE                 | 0.826                                                        | 0.426                          | 1634.94            | 695.92             | 0.352                          | 1287.60            | 452.89             |
| A_68_P26082681 | chr8:97852582-97852626                            | NM_024467:3246           | Zfp319        | INSIDE                 | 0.826                                                        | 2.356                          | 782.59             | 1843.73            | 1.946                          | 696.37             | 1355.32            |
| A_68_P27360774 | chr10:94151095-94151139                           | NR_015524:242            | 4932415G12Rik | INSIDE                 | 0.825                                                        | 0.435                          | 1890.30            | 822.10             | 0.359                          | 1557.69            | 559.20             |
| A_68_P25190568 | chr7:73985326-73985370                            | NM_001033877:728         | Adamts17      | INSIDE                 | 0.825                                                        | 0.498                          | 1256.99            | 625.60             | 0.410                          | 1037.68            | 425.89             |
| A_68_P32031151 | chr19:25746889-25746933                           | NM_145831:10             | Dmrt2         | INSIDE                 | 0.825                                                        | 0.578                          | 1111.70            | 642.01             | 0.477                          | 987.56             | 470.65             |
| A_68_P29055899 | chr13:55672091-55672135                           | NM_001162881:-776        | Fam193b       | PROMOTER               | 0.825                                                        | 0.659                          | 1536.79            | 1012.90            | 0.544                          | 1209.16            | 657.76             |
| A_68_P22293157 | chr3:84618617-84618661                            | NM_001177773:-860        | Fbxw7         | PROMOTER               | 0.825                                                        | 0.577                          | 2719.81            | 1569.79            | 0.476                          | 2222.88            | 1058.36            |
| A_68_P23284716 | chr4:127003696-127003740                          | NM_008126:2651           | Gjb3          | INSIDE                 | 0.825                                                        | 2.684                          | 1032.52            | 2771.60            | 2.215                          | 749.37             | 1659.52            |
| A_68_P26810120 | chr9:107537483-107537527                          | NM_008138:169            | Gnai2         | INSIDE                 | 0.825                                                        | 0.555                          | 1934.99            | 1074.55            | 0.458                          | 1354.21            | 620.09             |
| A_68_P24828013 | chr6:126594315-126594359                          | NM_010595:1483           | Kena1         | INSIDE                 | 0.825                                                        | 0.576                          | 1828.48            | 1052.30            | 0.475                          | 1493.19            | 708.83             |
| A_68_P27285757 | chr10:80297352-80297396                           | NM_001013758:9410        | Lingo3        | INSIDE                 | 0.825                                                        | 2.337                          | 2153.52            | 5031.72            | 1.928                          | 1702.08            | 3281.85            |
| A_68_P21102113 | chr2:30112262-30112306                            | NM_177725:18996          | Lrrc8a        | INSIDE                 | 0.825                                                        | 2.907                          | 325.56             | 946.34             | 2.399                          | 305.88             | 733.87             |
| A_68_P27279616 | chr10:79366039-79366083                           | NM_001163276:5623        | Med16         | INSIDE                 | 0.825                                                        | 2.505                          | 360.85             | 904.08             | 2.067                          | 316.30             | 653.91             |
| A_68_P26772682 | chr9:100977752-100977796                          | NM_001100451:-676        | Msl2          | PROMOTER               | 0.825                                                        | 0.609                          | 1313.71            | 799.86             | 0.503                          | 1100.47            | 553.09             |
| A_68_P31713139 | chr18:53577609-53577653                           | NM_008908:31             | Ppic          | INSIDE                 | 0.825                                                        | 0.599                          | 2574.71            | 1541.72            | 0.494                          | 1990.09            | 983.50             |
| A_68_P21570878 | chr2:119501345-119501389                          | NM_030112:563            | Rtf1          | INSIDE                 | 0.825                                                        | 1.723                          | 4381.10            | 7549.94            | 1.422                          | 2766.83            | 3935.70            |
| A_68_P20149053 | chr1:36614863-36614907                            | NM_001126047:342         | Sema4c        | INSIDE                 | 0.825                                                        | 0.490                          | 1520.79            | 745.05             | 0.404                          | 1301.49            | 525.89             |
| A_68_P30478335 | chr15:98957305-98957349                           | NM_139140:51             | Spats2        | INSIDE                 | 0.825                                                        | 2.452                          | 10006.92           | 24536.77           | 2.023                          | 6962.91            | 14088.64           |
| A_68_P21796151 | chr2:160472451-160472495                          | NM_009408:840            | Top1          | INSIDE                 | 0.825                                                        | 0.630                          | 2043.12            | 1286.59            | 0.519                          | 1645.45            | 854.70             |
| A_68_P21839205 | chr2:167875907-167875952                          |                          | Unknown       |                        | 0.825                                                        | 0.475                          | 1308.14            | 620.73             | 0.392                          | 1032.08            | 404.19             |
| A_68_P32565210 | chrX:98893741-98893785                            | ENSMUST00000073812:-6573 |               | PROMOTER               | 0.825                                                        | 2.088                          | 2308.74            | 4820.56            | 1.723                          | 921.05             | 1587.24            |
| A_68_P20644618 | chr1:138112553-138112597                          | NM_028872:18267          | 5730559C18Rik | INSIDE                 | 0.824                                                        | 2.071                          | 1224.34            | 2535.64            | 1.707                          | 915.21             | 1562.68            |
| A_68_P29413817 | chr14:13655575-13655619                           | NM_001042617:-3          | Cadps         | PROMOTER               | 0.824                                                        | 0.510                          | 1177.83            | 600.28             | 0.420                          | 950.08             | 398.87             |
| A_68_P26249222 | chr8:127578659-127578703                          | NM_174853:586            | Disc1         | INSIDE                 | 0.824                                                        | 0.608                          | 1147.09            | 696.94             | 0.501                          | 893.51             | 447.57             |
| A_68_P23657735 | chr5:46030561-46030605                            | NM_021416:158            | Fam184b       | INSIDE                 | 0.824                                                        | 0.579                          | 1054.80            | 610.36             | 0.477                          | 953.44             | 454.37             |
| A_68_P27094069 | chr10:41994845-41994889                           | NM_019740:1682           | Foxo3         | INSIDE                 | 0.824                                                        | 2.125                          | 850.24             | 1806.96            | 1.752                          | 803.46             | 1407.56            |
| A_68_P30513463 | chr16:5049834-5049878                             | NM_001079814:147         | Glyr1         | INSIDE                 | 0.824                                                        | 0.461                          | 1626.13            | 750.08             | 0.380                          | 1318.55            | 501.02             |
| A_68_P23955547 | chr5:105909960-105910004                          | NM_001033550:65189       | Lrrc8b        | INSIDE                 | 0.824                                                        | 4.012                          | 552.75             | 2217.53            | 3.304                          | 495.14             | 1636.15            |
| A_68_P29269914 | chr13:101514118-101514163                         | NM_001190264:474         | Mrps36        | INSIDE                 | 0.824                                                        | 2.606                          | 1497.82            | 3902.64            | 2.146                          | 1267.24            | 2719.56            |

| ProbeName      | Target position of probe on CpG island microarray | TargetID                | GeneSymbol    | CpG island Description | Ratio of relative methylation (TiO <sub>2</sub> -NP/Vehicle) | Sham group                     |                    |                    | TiO <sub>2</sub> -H group      |                    |                    |
|----------------|---------------------------------------------------|-------------------------|---------------|------------------------|--------------------------------------------------------------|--------------------------------|--------------------|--------------------|--------------------------------|--------------------|--------------------|
|                |                                                   |                         |               |                        |                                                              | Relative methylation (Cy5/Cy3) | Cy3 signal (Input) | Cy5 signal (MeDIP) | Relative methylation (Cy5/Cy3) | Cy3 signal (Input) | Cy5 signal (MeDIP) |
| A_68_P31110191 | chr17:26569160-26569204                           | NM_001081656:17273      | Neurl1b       | INSIDE                 | 0.824                                                        | 2.006                          | 615.25             | 1234.15            | 1.652                          | 503.45             | 831.70             |
| A_68_P31626273 | chr18:37107754-37107798                           | NM_007766:4566          | Pcdha4        | PROMOTER               | 0.824                                                        | 1.786                          | 1202.16            | 2146.84            | 1.472                          | 981.29             | 1444.06            |
| A_68_P24589127 | chr6:82602908-82602952                            | NM_025882:-71           | Pole4         | PROMOTER               | 0.824                                                        | 2.655                          | 619.96             | 1646.11            | 2.187                          | 533.87             | 1167.68            |
| A_68_P26714889 | chr9:89803449-89803494                            | NM_001039655:-1141      | Rasgrf1       | PROMOTER               | 0.824                                                        | 1.831                          | 817.48             | 1497.06            | 1.508                          | 692.04             | 1043.75            |
| A_68_P24992475 | chr7:19872268-19872312                            | NM_001025364:-4157      | Rtn2          | PROMOTER               | 0.824                                                        | 2.230                          | 771.60             | 1720.57            | 1.837                          | 764.72             | 1404.83            |
| A_68_P26823387 | chr9:110283734-110283778                          | NM_001001144:47960      | Scap          | INSIDE                 | 0.824                                                        | 1.906                          | 876.48             | 1670.65            | 1.571                          | 733.14             | 1151.43            |
| A_68_P28314928 | chr12:29435138-29435182                           | NM_001161410:99         | Ttc15         | INSIDE                 | 0.824                                                        | 0.508                          | 1511.76            | 767.98             | 0.419                          | 1279.59            | 535.52             |
| A_68_P21533268 | chr2:113057184-113057228                          | ENSMUST00000099579:-3   |               | PROMOTER               | 0.824                                                        | 3.295                          | 172.06             | 566.94             | 2.714                          | 202.89             | 550.70             |
| A_68_P31933968 | chr19:6320770-6320814                             | NM_001033342:14336      | Cdc42bpg      | INSIDE                 | 0.823                                                        | 1.891                          | 826.44             | 1562.76            | 1.557                          | 652.08             | 1015.16            |
| A_68_P27997873 | chr11:87916729-87916773                           | NM_198013:4103          | Cuedc1        | INSIDE                 | 0.823                                                        | 1.930                          | 778.48             | 1502.72            | 1.588                          | 695.98             | 1105.09            |
| A_68_P20639341 | chr1:137326555-137326604                          | NM_153774:489           | Ipo9          | INSIDE                 | 0.823                                                        | 2.473                          | 4257.68            | 10528.41           | 2.036                          | 2811.02            | 5722.20            |
| A_68_P30346593 | chr15:76009282-76009326                           | NM_201394:16836         | Plec          | INSIDE                 | 0.823                                                        | 3.693                          | 324.22             | 1197.19            | 3.039                          | 299.88             | 911.30             |
| A_68_P30577647 | chr16:18128056-18128100                           | NM_022982:280           | Rtn4r         | INSIDE                 | 0.823                                                        | 0.666                          | 2499.02            | 1663.55            | 0.548                          | 2189.30            | 1198.97            |
| A_68_P24763847 | chr6:114081056-114081100                          | NM_172890:-156          | Slec6a11      | PROMOTER               | 0.823                                                        | 0.692                          | 1395.60            | 965.66             | 0.569                          | 1263.33            | 719.06             |
| A_68_P29117521 | chr13:69878252-69878296                           | NM_001145162:501        | Ube2q11       | INSIDE                 | 0.823                                                        | 0.683                          | 1804.11            | 1233.10            | 0.563                          | 1467.36            | 825.74             |
| A_68_P27177057 | chr10:60293808-60293852                           | NM_029770:499           | Unc5b         | INSIDE                 | 0.823                                                        | 0.577                          | 1068.23            | 615.91             | 0.474                          | 881.75             | 418.29             |
| A_68_P26744826 | chr9:95855075-95855119                            | NM_011916:-82           | Xrm1          | PROMOTER               | 0.823                                                        | 0.631                          | 2724.72            | 1719.43            | 0.520                          | 2035.75            | 1057.74            |
| A_68_P26082678 | chr8:97852139-97852183                            | NM_024467:3690          | Zfp319        | INSIDE                 | 0.823                                                        | 2.659                          | 504.27             | 1340.89            | 2.188                          | 450.26             | 985.17             |
| A_68_P21839460 | chr2:167924365-167924409                          | NM_021409:17883         | Pard6b        | INSIDE                 | 0.822                                                        | 2.357                          | 1429.97            | 3370.88            | 1.938                          | 1197.95            | 2321.38            |
| A_68_P21839461 | chr2:167924453-167924497                          | NM_021409:17971         | Pard6b        | INSIDE                 | 0.822                                                        | 2.900                          | 1784.44            | 5175.47            | 2.384                          | 1438.31            | 3429.20            |
| A_68_P27431037 | chr10:107769728-107769772                         | NM_054056:506           | Pawr          | INSIDE                 | 0.822                                                        | 0.559                          | 1056.42            | 590.89             | 0.460                          | 964.80             | 443.47             |
| A_68_P31626317 | chr18:37114129-37114173                           | NM_009959:-5943         | Pcdha5        | PROMOTER               | 0.822                                                        | 3.480                          | 2306.08            | 8024.77            | 2.859                          | 1562.60            | 4467.33            |
| A_68_P26237922 | chr8:125626652-125626696                          | NR_028128:-283          | Snord68       | PROMOTER               | 0.822                                                        | 0.472                          | 1328.56            | 626.66             | 0.388                          | 1156.25            | 448.36             |
| A_68_P28520551 | chr12:71553926-71553970                           | NM_028339:-192          | Tmx1          | PROMOTER               | 0.822                                                        | 0.504                          | 1094.21            | 551.81             | 0.414                          | 802.27             | 332.41             |
| A_68_P29438119 | chr14:19159713-19159757                           | NM_009455:4624          | Ube2e1        | INSIDE                 | 0.822                                                        | 0.712                          | 1979.15            | 1409.66            | 0.586                          | 1744.52            | 1021.48            |
| A_68_P26139676 | chr8:108939349-108939393                          | NM_011764:132           | Zfp90         | INSIDE                 | 0.822                                                        | 0.634                          | 1158.61            | 734.07             | 0.521                          | 875.79             | 456.12             |
| A_68_P31256676 | chr17:56651744-56651788                           | NM_011483:140           | Znr4f         | INSIDE                 | 0.822                                                        | 1.878                          | 691.37             | 1298.27            | 1.544                          | 611.57             | 944.01             |
| A_68_P31175212 | A_68_P31175212                                    |                         | Unknown       |                        | 0.822                                                        | 5.231                          | 929.87             | 4864.38            | 4.302                          | 668.87             | 2877.32            |
| A_68_P26276226 | chr9:4260571-4260615                              |                         | Unknown       |                        | 0.822                                                        | 2.186                          | 1243.11            | 2718.05            | 1.798                          | 1022.85            | 1838.69            |
| A_68_P24830750 | chr6:127059445-127059489                          | NM_177003:104           | 9630033F20Rik | INSIDE                 | 0.821                                                        | 0.573                          | 1803.02            | 1034.02            | 0.471                          | 1466.12            | 690.02             |
| A_68_P31637167 | chr18:39152800-39152844                           | NM_175164:24            | Arhgap26      | INSIDE                 | 0.821                                                        | 0.361                          | 1667.86            | 601.65             | 0.296                          | 1398.74            | 414.48             |
| A_68_P32111333 | chr19:40906458-40906502                           | NM_172839:712           | Cenj          | INSIDE                 | 0.821                                                        | 2.290                          | 632.98             | 1449.54            | 1.879                          | 544.68             | 1023.72            |
| A_68_P24994309 | chr7:20189517-20189561                            | NM_016680:279           | Clasrp        | INSIDE                 | 0.821                                                        | 0.701                          | 1272.87            | 892.06             | 0.576                          | 1052.60            | 605.80             |
| A_68_P31540304 | chr18:20716579-20716623                           | NM_007883:-16           | Dsg2          | PROMOTER               | 0.821                                                        | 0.619                          | 1397.11            | 865.46             | 0.509                          | 1097.69            | 558.26             |
| A_68_P20613817 | chr1:133034698-133034742                          | NM_145508:91            | Dyrk3         | INSIDE                 | 0.821                                                        | 2.595                          | 366.79             | 951.96             | 2.131                          | 319.06             | 679.81             |
| A_68_P25827834 | chr8:46095559-46095614                            | NM_001081286:60025      | Fat1          | INSIDE                 | 0.821                                                        | 2.238                          | 538.62             | 1205.17            | 1.838                          | 477.07             | 876.83             |
| A_68_P21102110 | chr2:30111958-30112002                            | NM_177725:18692         | Lrrc8a        | INSIDE                 | 0.821                                                        | 2.215                          | 1155.02            | 2558.82            | 1.818                          | 968.74             | 1761.40            |
| A_68_P32140496 | chr19:45857387-45857431                           | NM_023799:373           | Mgea5         | INSIDE                 | 0.821                                                        | 0.534                          | 1036.11            | 553.01             | 0.438                          | 857.47             | 375.52             |
| A_68_P27349650 | chr10:92185045-92185089                           | NM_008682:97            | Nedd1         | INSIDE                 | 0.821                                                        | 0.539                          | 1124.68            | 606.41             | 0.443                          | 949.17             | 420.24             |
| A_68_P23244925 | chr4:118992833-118992877                          | NM_028677:274           | Ppih          | INSIDE                 | 0.821                                                        | 0.577                          | 1732.38            | 999.65             | 0.473                          | 1247.07            | 590.49             |
| A_68_P25091649 | chr7:52437106-52437150                            | NM_053256:764           | Pth2          | INSIDE                 | 0.821                                                        | 0.435                          | 1245.67            | 541.48             | 0.357                          | 920.81             | 328.58             |
| A_68_P28707013 | chr12:106270418-106270462                         | NR_028576:-881          | Scarna13      | PROMOTER               | 0.821                                                        | 0.590                          | 1257.06            | 741.17             | 0.484                          | 1078.69            | 521.88             |
| A_68_P30360709 | chr15:78370273-78370318                           | NM_009218:4480          | Sstr3         | INSIDE                 | 0.821                                                        | 2.353                          | 729.54             | 1716.49            | 1.932                          | 607.47             | 1173.52            |
| A_68_P30176272 | chr15:43308622-43308666                           | NM_025736:-130          | Ttc35         | PROMOTER               | 0.821                                                        | 0.455                          | 1580.20            | 719.45             | 0.374                          | 1384.05            | 517.59             |
| A_68_P24302938 | chr6:24615029-24615073                            | NM_028459:-55           | Wasl          | PROMOTER               | 0.821                                                        | 0.581                          | 1880.17            | 1092.74            | 0.477                          | 1700.76            | 811.20             |
| A_68_P24427166 | chr6:48388473-48388517                            | NM_001085415:6595       | Zfp467        | INSIDE                 | 0.821                                                        | 1.941                          | 2733.78            | 5305.90            | 1.593                          | 2381.77            | 3793.85            |
| A_68_P31022094 | chr17:6256953-6256997                             | ENSMUST00000121576:3072 |               | DOWNSTREAM             | 0.821                                                        | 0.676                          | 1249.79            | 845.23             | 0.555                          | 1161.31            | 644.54             |
| A_68_P27975823 | chr11:83993524-83993568                           | ENSMUST00000137500:172  |               | INSIDE                 | 0.821                                                        | 2.059                          | 1399.52            | 2881.46            | 1.690                          | 1258.28            | 2126.38            |
| A_68_P27843672 | chr11:60352207-60352251                           | NM_172943:1044          | Alkbh5        | INSIDE                 | 0.820                                                        | 0.555                          | 1121.80            | 622.61             | 0.455                          | 915.91             | 416.92             |
| A_68_P30484703 | chr15:100058755-100058799                         | NM_007497:487           | Atf1          | INSIDE                 | 0.820                                                        | 3.124                          | 198.88             | 621.25             | 2.562                          | 280.55             | 718.84             |
| A_68_P31925372 | chr19:4839600-4839644                             | NM_207268:257           | Ccdc87        | INSIDE                 | 0.820                                                        | 1.835                          | 1270.30            | 2330.91            | 1.504                          | 1092.45            | 1643.53            |

| ProbeName      | Target position of probe on CpG island microarray | TargetID               | GeneSymbol    | CpG island Description | Ratio of relative methylation (TiO <sub>2</sub> -NP/Vehicle) | Sham group                     |                    |                    | TiO <sub>2</sub> -H group      |                    |                    |
|----------------|---------------------------------------------------|------------------------|---------------|------------------------|--------------------------------------------------------------|--------------------------------|--------------------|--------------------|--------------------------------|--------------------|--------------------|
|                |                                                   |                        |               |                        |                                                              | Relative methylation (Cy5/Cy3) | Cy3 signal (Input) | Cy5 signal (MeDIP) | Relative methylation (Cy5/Cy3) | Cy3 signal (Input) | Cy5 signal (MeDIP) |
| A_68_P25230684 | chr7:80885602-80885646                            | NM_001162532:432       | Fam174b       | INSIDE                 | 0.820                                                        | 0.463                          | 1806.77            | 836.71             | 0.380                          | 1562.77            | 593.59             |
| A_68_P24476403 | chr6:56654673-56654717                            | NM_025520:-1           | Lsm5          | PROMOTER               | 0.820                                                        | 0.489                          | 1126.32            | 550.58             | 0.401                          | 939.16             | 376.62             |
| A_68_P31632607 | chr18:38359003-38359047                           | NM_029357:10392        | Pcdh1         | INSIDE                 | 0.820                                                        | 2.188                          | 531.96             | 1163.87            | 1.793                          | 427.51             | 766.54             |
| A_68_P22165656 | chr3:57651792-57651836                            | NM_019410:-135         | Pfn2          | PROMOTER               | 0.820                                                        | 0.365                          | 2647.45            | 967.06             | 0.300                          | 2277.47            | 682.23             |
| A_68_P32075619 | chr19:33466689-33466733                           | NM_001146342:75        | Rnls          | INSIDE                 | 0.820                                                        | 1.736                          | 1218.37            | 2114.60            | 1.424                          | 1076.53            | 1532.83            |
| A_68_P30363495 | chr15:78798496-78798540                           | NM_001039155:20365     | Triobp        | INSIDE                 | 0.820                                                        | 2.378                          | 2642.41            | 6284.61            | 1.951                          | 1781.52            | 3475.56            |
| A_68_P21433076 | chr2:93028001-93028045                            | NM_001025246:282       | Trp53i11      | INSIDE                 | 0.820                                                        | 0.691                          | 1250.08            | 863.62             | 0.566                          | 1004.82            | 568.94             |
| A_68_P22168177 | chr3:58220956-58221000                            | NM_001081229:1368      | Tsc22d2       | INSIDE                 | 0.820                                                        | 3.239                          | 347.65             | 1126.19            | 2.656                          | 322.18             | 855.65             |
| A_68_P22970879 | chr4:63156617-63156661                            | NM_001008791:347       | Whrn          | INSIDE                 | 0.820                                                        | 0.640                          | 2340.97            | 1497.08            | 0.524                          | 1908.12            | 1000.19            |
| A_68_P30425031 | chr15:89240528-89240572                           | NM_001162882:144       | 1700007E06Rik | INSIDE                 | 0.819                                                        | 2.012                          | 1442.96            | 2902.61            | 1.648                          | 1171.78            | 1931.10            |
| A_68_P23262656 | chr4:123088950-123088994                          | NM_001167918:182       | D830031N03Rik | INSIDE                 | 0.819                                                        | 0.665                          | 1689.79            | 1124.17            | 0.545                          | 1278.35            | 696.94             |
| A_68_P31099849 | chr17:24986693-24986737                           | NM_023480:533          | Fahd1         | INSIDE                 | 0.819                                                        | 2.067                          | 986.71             | 2039.36            | 1.693                          | 933.85             | 1580.62            |
| A_68_P28176853 | chr11:119129394-119129438                         | NM_008064:95           | Gaa           | INSIDE                 | 0.819                                                        | 2.064                          | 959.63             | 1980.90            | 1.690                          | 902.90             | 1525.92            |
| A_68_P24116582 | chr5:135964932-135964981                          | NM_146001:56036        | Hip1          | INSIDE                 | 0.819                                                        | 0.526                          | 1066.04            | 560.53             | 0.431                          | 913.01             | 393.11             |
| A_68_P25528906 | chr7:138686742-138686786                          | NM_008257:288          | Hmx3          | INSIDE                 | 0.819                                                        | 0.654                          | 1224.61            | 800.79             | 0.535                          | 965.53             | 516.87             |
| A_68_P30501057 | chr15:102796954-102796998                         | NM_010462:-250         | Hoxc10        | PROMOTER               | 0.819                                                        | 0.536                          | 1918.77            | 1029.28            | 0.439                          | 1366.28            | 600.03             |
| A_68_P25095291 | chr7:53074739-53074783                            | NM_145963:5357         | Kenj14        | INSIDE                 | 0.819                                                        | 1.992                          | 1523.38            | 3035.18            | 1.632                          | 1425.05            | 2325.57            |
| A_68_P30939711 | chr16:87432394-87432438                           | NM_001081068:435       | Ltn1          | INSIDE                 | 0.819                                                        | 0.647                          | 2196.34            | 1420.48            | 0.530                          | 1700.69            | 901.16             |
| A_68_P27279591 | chr10:79362212-79362259                           | NM_001163276:9448      | Med16         | INSIDE                 | 0.819                                                        | 2.057                          | 1609.00            | 3309.68            | 1.684                          | 1268.24            | 2136.25            |
| A_68_P26134882 | chr8:108138235-108138279                          | NR_035492:-1109        | Mir1966       | PROMOTER               | 0.819                                                        | 0.488                          | 1178.97            | 575.24             | 0.400                          | 1187.37            | 474.76             |
| A_68_P30423620 | chr15:88997813-88997857                           | NM_001159521:6446      | Plxbn2        | INSIDE                 | 0.819                                                        | 2.109                          | 1309.57            | 2761.50            | 1.727                          | 1019.90            | 1761.59            |
| A_68_P23232474 | chr4:116782205-116782250                          | NM_008958:13267        | Ptch2         | INSIDE                 | 0.819                                                        | 2.659                          | 1172.81            | 3118.36            | 2.177                          | 1016.94            | 2213.91            |
| A_68_P21780566 | chr2:157854552-157854596                          | NM_027434:45           | Rprnd1b       | INSIDE                 | 0.819                                                        | 0.701                          | 2164.36            | 1516.83            | 0.574                          | 1758.62            | 1009.21            |
| A_68_P27936385 | chr11:77029455-77029499                           | NM_177710:-450         | Ssh2          | PROMOTER               | 0.819                                                        | 0.579                          | 942.93             | 545.51             | 0.474                          | 828.32             | 392.25             |
| A_68_P28636740 | chr12:93017016-93017060                           | NM_175367:7838         | Ston2         | INSIDE                 | 0.819                                                        | 1.887                          | 950.99             | 1794.46            | 1.545                          | 801.41             | 1237.95            |
| A_68_P22059538 | chr3:36588855-36588899                            | NM_019510:213          | Trpc3         | INSIDE                 | 0.819                                                        | 2.044                          | 634.93             | 1297.53            | 1.673                          | 644.18             | 1077.85            |
| A_68_P25158146 | chr7:66484168-66484212                            | NM_001033962:69        | Ubc3a         | INSIDE                 | 0.819                                                        | 0.620                          | 917.26             | 569.06             | 0.508                          | 732.20             | 372.02             |
| A_68_P22413522 | chr3:108394356-108394400                          | NM_181400:183          | Wdr47         | INSIDE                 | 0.819                                                        | 0.643                          | 1740.14            | 1119.49            | 0.527                          | 1466.23            | 772.95             |
| A_68_P31206536 | chr17:46520399-46520443                           | NM_207671:-294         | Zfp318        | PROMOTER               | 0.819                                                        | 0.488                          | 1579.77            | 770.62             | 0.399                          | 1296.77            | 517.93             |
| A_68_P29961930 | chr14:122873605-122873656                         | NM_009574:-975         | Zic2          | DIVERGENT_PROMOTER     | 0.819                                                        | 3.206                          | 673.75             | 2159.84            | 2.625                          | 608.70             | 1598.08            |
| A_68_P29033260 | chr13:51690350-51690394                           |                        |               | Unknown                | 0.819                                                        | 1.635                          | 5981.68            | 9779.46            | 1.339                          | 4571.47            | 6120.90            |
| A_68_P27556423 | chr11:4118542-4118586                             | NM_028022:311          | Gatsl3        | INSIDE                 | 0.818                                                        | 0.698                          | 1597.53            | 1114.46            | 0.571                          | 1371.65            | 783.19             |
| A_68_P28156584 | chr11:115836130-115836174                         | NM_001005608:114       | Irgb4         | INSIDE                 | 0.818                                                        | 0.534                          | 1004.05            | 536.00             | 0.437                          | 949.08             | 414.30             |
| A_68_P28201374 | chr12:4599811-4599855                             | NM_001198969:19        | Itsn2         | INSIDE                 | 0.818                                                        | 2.360                          | 334.47             | 789.23             | 1.930                          | 330.09             | 637.23             |
| A_68_P25394536 | chr7:112959464-112959508                          | NM_025301:115          | Mrpl17        | INSIDE                 | 0.818                                                        | 0.585                          | 2305.70            | 1349.82            | 0.479                          | 2005.00            | 960.49             |
| A_68_P21626036 | chr2:129513877-129513921                          | NM_018863:1706         | Pdyn          | INSIDE                 | 0.818                                                        | 2.371                          | 2654.47            | 6293.01            | 1.939                          | 2296.66            | 4454.06            |
| A_68_P20053920 | chr1:16095231-16095275                            | NM_133832:-710         | Rdh10         | DIVERGENT_PROMOTER     | 0.818                                                        | 0.636                          | 1131.41            | 720.10             | 0.521                          | 1088.96            | 567.19             |
| A_68_P31412096 | chr17:86084881-86084925                           | NM_011380:2692         | Six2          | INSIDE                 | 0.818                                                        | 0.497                          | 2138.77            | 1062.09            | 0.406                          | 1611.16            | 654.61             |
| A_68_P27287002 | chr10:80494365-80494409                           | NM_134135:2271         | Slc39a3       | INSIDE                 | 0.818                                                        | 2.052                          | 1457.52            | 2990.17            | 1.678                          | 1184.88            | 1987.84            |
| A_68_P25235045 | chr7:81649413-81649459                            | NM_001038643:50230     | Slco3a1       | INSIDE                 | 0.818                                                        | 2.350                          | 1180.55            | 2774.81            | 1.923                          | 974.02             | 1873.02            |
| A_68_P26887820 | chr9:122075655-122075699                          | NM_001164572:49293     | Snrk          | INSIDE                 | 0.818                                                        | 2.374                          | 1952.23            | 4634.09            | 1.941                          | 1548.11            | 3005.53            |
| A_68_P20634935 | chr1:136606036-136606080                          | NM_009307:62801        | Syt2          | INSIDE                 | 0.818                                                        | 1.950                          | 1240.39            | 2419.25            | 1.596                          | 1068.73            | 1705.42            |
| A_68_P27845267 | chr11:60692365-60692409                           | NM_001168507:154       | Tmem11        | INSIDE                 | 0.818                                                        | 0.674                          | 2204.68            | 1486.27            | 0.551                          | 1582.59            | 872.54             |
| A_68_P28166382 | chr11:117515746-117515790                         | NM_198022:166          | Tnrc6c        | INSIDE                 | 0.818                                                        | 0.371                          | 1624.49            | 603.19             | 0.304                          | 1321.58            | 401.33             |
| A_68_P28682593 | chr12:101758834-101758878                         | NM_001033213:176       | Ttc7b         | INSIDE                 | 0.818                                                        | 2.244                          | 406.96             | 913.39             | 1.836                          | 375.78             | 690.06             |
| A_68_P28553604 | chr12:77472031-77472075                           | NM_178744:800          | Zbtb1         | INSIDE                 | 0.818                                                        | 0.610                          | 1110.22            | 677.17             | 0.499                          | 856.60             | 427.17             |
| A_68_P23276158 | chr4:125407005-125407049                          |                        |               | Unknown                | 0.818                                                        | 0.537                          | 1203.46            | 646.39             | 0.440                          | 877.39             | 385.62             |
| A_68_P21044870 | chr2:19352656-19352700                            | ENSMUST00000137714:932 |               | INSIDE                 | 0.818                                                        | 0.601                          | 926.12             | 556.47             | 0.491                          | 741.25             | 364.11             |
| A_68_P33007149 | chr9_random:50218-50262                           | NR_015516:-3168        | 493052615Rik  | PROMOTER               | 0.817                                                        | 2.443                          | 1058.05            | 2584.36            | 1.995                          | 894.99             | 1785.63            |
| A_68_P26158887 | chr8:112303066-112303110                          | NM_009677:549          | Ap1g1         | INSIDE                 | 0.817                                                        | 0.559                          | 1196.11            | 668.81             | 0.457                          | 1001.38            | 457.42             |
| A_68_P28739139 | chr12:111829705-111829749                         | NR_033340:143          | B930059L03Rik | INSIDE                 | 0.817                                                        | 0.583                          | 1336.19            | 778.83             | 0.476                          | 1143.54            | 544.61             |

| ProbeName      | Target position of probe on CpG island microarray | TargetID               | GeneSymbol    | CpG island Description | Ratio of relative methylation (TiO <sub>2</sub> -NP/Vehicle) | Sham group                     |                    |                    | TiO <sub>2</sub> -H group      |                    |                    |
|----------------|---------------------------------------------------|------------------------|---------------|------------------------|--------------------------------------------------------------|--------------------------------|--------------------|--------------------|--------------------------------|--------------------|--------------------|
|                |                                                   |                        |               |                        |                                                              | Relative methylation (Cy5/Cy3) | Cy3 signal (Input) | Cy5 signal (MeDIP) | Relative methylation (Cy5/Cy3) | Cy3 signal (Input) | Cy5 signal (MeDIP) |
| A_68_P28731497 | chr12:110271448-110271492                         | NM_001163175:34957     | Begain        | INSIDE                 | 0.817                                                        | 1.885                          | 733.91             | 1383.42            | 1.539                          | 657.93             | 1012.77            |
| A_68_P26790785 | chr9:104164746-104164790                          | NM_001163026:492       | Dnajc13       | INSIDE                 | 0.817                                                        | 2.167                          | 4265.32            | 9244.58            | 1.772                          | 2836.12            | 5024.55            |
| A_68_P21102298 | chr2:30141644-30141688                            | NM_177648:208          | Dolk          | INSIDE                 | 0.817                                                        | 0.636                          | 2141.72            | 1361.40            | 0.520                          | 1725.59            | 896.54             |
| A_68_P28152425 | chr11:115127972-115128017                         | NM_010350:563          | Grin2c        | INSIDE                 | 0.817                                                        | 0.457                          | 1288.04            | 588.57             | 0.373                          | 943.08             | 351.96             |
| A_68_P27924587 | chr11:74982348-74982392                           | NM_001098203:-716      | Hic1          | PROMOTER               | 0.817                                                        | 0.597                          | 1009.92            | 603.14             | 0.488                          | 856.57             | 417.84             |
| A_68_P32385148 | chrX:50341666-50341710                            | NM_013556:434          | Hprt          | INSIDE                 | 0.817                                                        | 2.559                          | 5237.74            | 13405.70           | 2.091                          | 2399.18            | 5016.67            |
| A_68_P23439342 | chr4:154938332-154938376                          | NM_001159637:431       | Nadk          | INSIDE                 | 0.817                                                        | 0.634                          | 1284.15            | 813.54             | 0.518                          | 1043.34            | 540.32             |
| A_68_P22593186 | chr3:142544706-142544750                          | NM_178654:240          | Pkn2          | INSIDE                 | 0.817                                                        | 0.583                          | 1830.48            | 1067.98            | 0.476                          | 1757.69            | 837.39             |
| A_68_P29622736 | chr14:57021701-57021745                           | NM_001033043:189       | Rnf17         | INSIDE                 | 0.817                                                        | 2.942                          | 1239.93            | 3647.56            | 2.404                          | 1047.13            | 2517.04            |
| A_68_P27930796 | chr11:76057294-76057338                           | NM_183263:79           | Rnmtl1        | INSIDE                 | 0.817                                                        | 0.617                          | 1852.30            | 1143.59            | 0.505                          | 1575.54            | 794.92             |
| A_68_P27165506 | chr10:58276067-58276111                           | NM_172788:-18          | Sh3rf3        | PROMOTER               | 0.817                                                        | 1.841                          | 824.17             | 1517.40            | 1.504                          | 715.88             | 1076.56            |
| A_68_P23694281 | chr5:52759674-52759718                            | NM_011435:4654         | Sod3          | INSIDE                 | 0.817                                                        | 1.875                          | 961.50             | 1803.16            | 1.533                          | 917.69             | 1406.91            |
| A_68_P31620710 | chr18:36047752-36047796                           |                        |               | Unknown                | 0.817                                                        | 0.511                          | 1310.63            | 670.35             | 0.418                          | 1007.16            | 420.77             |
| A_68_P27883393 | chr11:67269391-67269435                           | ENSMUST00000136796:187 |               | INSIDE                 | 0.817                                                        | 0.663                          | 980.52             | 649.69             | 0.541                          | 823.51             | 445.54             |
| A_68_P20161229 | chr1:38683722-38683766                            | NM_010678:38056        | Aff3          | INSIDE                 | 0.816                                                        | 0.674                          | 1546.99            | 1042.07            | 0.550                          | 1079.51            | 593.43             |
| A_68_P29874397 | chr14:105339298-105339349                         | NR_015593:300960       | D130009118Rik | INSIDE                 | 0.816                                                        | 3.268                          | 733.13             | 2395.75            | 2.665                          | 634.00             | 1689.91            |
| A_68_P20613761 | chr1:133026181-133026240                          | NM_145508:8601         | Dyrk3         | INSIDE                 | 0.816                                                        | 2.252                          | 493.92             | 1112.10            | 1.837                          | 379.24             | 696.70             |
| A_68_P24005876 | chr5:115199309-115199353                          | NM_001077360:24170     | Git2          | INSIDE                 | 0.816                                                        | 2.281                          | 705.22             | 1608.36            | 1.860                          | 661.50             | 1230.49            |
| A_68_P28842029 | chr13:15555847-15555891                           | NM_008130:313          | Gli3          | INSIDE                 | 0.816                                                        | 0.686                          | 2773.12            | 1901.88            | 0.560                          | 2305.85            | 1290.95            |
| A_68_P23440311 | chr4:155113949-155113993                          | NM_001101506:5058      | Gm5151        | INSIDE                 | 0.816                                                        | 2.069                          | 681.27             | 1409.27            | 1.688                          | 565.33             | 954.02             |
| A_68_P24142210 | chr5:141082443-141082487                          | NM_008494:-830         | Lfng          | PROMOTER               | 0.816                                                        | 0.571                          | 1190.66            | 680.29             | 0.466                          | 1075.69            | 501.24             |
| A_68_P27533638 | chr10:126478027-126478071                         | NM_001205036:402       | LOC100504608  | INSIDE                 | 0.816                                                        | 1.882                          | 7658.51            | 14413.93           | 1.535                          | 6041.52            | 9274.65            |
| A_68_P28748042 | chr12:113369264-113369308                         | NR_029590:196          | Mir203        | DOWNSTREAM             | 0.816                                                        | 0.621                          | 1882.93            | 1169.30            | 0.507                          | 1428.37            | 724.12             |
| A_68_P25948616 | chr8:72426603-72426647                            | NM_023312:-167         | Ndufa13       | PROMOTER               | 0.816                                                        | 0.457                          | 1212.76            | 554.46             | 0.373                          | 993.68             | 370.60             |
| A_68_P20625766 | chr1:135027721-135027765                          | NM_133819:0            | Ppp1r15b      | INSIDE                 | 0.816                                                        | 0.686                          | 2217.65            | 1520.60            | 0.560                          | 1704.29            | 953.82             |
| A_68_P22558739 | chr3:136333126-136333170                          | NM_008913:-585         | Ppp3ca        | PROMOTER               | 0.816                                                        | 0.601                          | 1122.77            | 675.18             | 0.490                          | 923.32             | 452.80             |
| A_68_P23062649 | chr4:83132368-83132412                            | NM_133948:-96          | Psip1         | PROMOTER               | 0.816                                                        | 3.822                          | 235.05             | 898.34             | 3.119                          | 213.73             | 666.56             |
| A_68_P31213957 | chr17:47873861-47873905                           | NM_001161722:-103      | Tefeb         | PROMOTER               | 0.816                                                        | 0.597                          | 1517.99            | 906.23             | 0.487                          | 1172.66            | 571.23             |
| A_68_P24639210 | chr6:91423696-91423740                            | NM_028766:-26          | Tmem43        | DIVERGENT_PROMOTER     | 0.816                                                        | 2.461                          | 865.57             | 2130.10            | 2.009                          | 832.68             | 1672.96            |
| A_68_P25360662 | chr7:106397588-106397632                          |                        |               | Unknown                | 0.816                                                        | 0.585                          | 1185.61            | 693.53             | 0.477                          | 1034.68            | 493.70             |
| A_68_P22353013 | chr3:96963291-96963335                            | NM_019800:613          | Acp6          | INSIDE                 | 0.815                                                        | 0.625                          | 879.85             | 550.21             | 0.510                          | 877.09             | 447.16             |
| A_68_P26716245 | chr9:90058242-90058286                            | NM_001003911:449       | Adams7        | INSIDE                 | 0.815                                                        | 0.473                          | 1391.93            | 657.90             | 0.385                          | 1010.83            | 389.51             |
| A_68_P23595356 | chr5:34959356-34959400                            | NM_001024458:43016     | Add1          | INSIDE                 | 0.815                                                        | 3.868                          | 868.95             | 3361.03            | 3.151                          | 680.04             | 2142.87            |
| A_68_P32573855 | chrX:100810329-100810376                          | NR_028381:8741         | B230206F22Rik | INSIDE                 | 0.815                                                        | 3.401                          | 1140.83            | 3880.36            | 2.772                          | 420.52             | 1165.76            |
| A_68_P27281215 | chr10:79601896-79601940                           | NM_001195268:-1786     | Dos           | PROMOTER               | 0.815                                                        | 0.661                          | 1621.12            | 1071.53            | 0.539                          | 1301.01            | 700.94             |
| A_68_P23363148 | chr4:140847464-140847508                          | NM_010139:-9668        | Epha2         | PROMOTER               | 0.815                                                        | 0.549                          | 1673.33            | 918.79             | 0.448                          | 1347.67            | 603.12             |
| A_68_P27643872 | chr11:22908277-22908321                           | NM_028672:-5088        | Fam161a       | PROMOTER               | 0.815                                                        | 0.486                          | 1360.31            | 661.32             | 0.396                          | 1195.90            | 473.90             |
| A_68_P26224355 | chr8:123608416-123608460                          | NM_010426:65           | Foxfla        | INSIDE                 | 0.815                                                        | 0.521                          | 1842.14            | 958.97             | 0.424                          | 1456.71            | 618.14             |
| A_68_P30490488 | chr15:101062388-101062432                         | NM_019518:7773         | Grasp         | INSIDE                 | 0.815                                                        | 1.892                          | 1188.77            | 2249.15            | 1.542                          | 972.73             | 1499.73            |
| A_68_P30369638 | chr15:79832223-79832267                           | NM_011057:12994        | Pdgbf         | INSIDE                 | 0.815                                                        | 1.843                          | 811.88             | 1496.15            | 1.503                          | 693.77             | 1042.45            |
| A_68_P26798484 | chr9:105547053-105547097                          | NM_001081309:1750      | Pik3r4        | INSIDE                 | 0.815                                                        | 3.839                          | 2090.85            | 8026.68            | 3.127                          | 1384.47            | 4329.72            |
| A_68_P27550647 | chr11:3093206-3093251                             | NM_030207:238          | Sfi1          | INSIDE                 | 0.815                                                        | 2.804                          | 1648.32            | 4621.38            | 2.284                          | 1615.38            | 3690.08            |
| A_68_P26710369 | chr9:88377894-88377938                            | NM_019796:-681         | Syncrip       | PROMOTER               | 0.815                                                        | 0.664                          | 1064.23            | 707.14             | 0.541                          | 963.89             | 521.67             |
| A_68_P24153533 | chr5:143577184-143577235                          | NM_001122730:1857      | Tnfr18        | INSIDE                 | 0.815                                                        | 0.585                          | 1026.14            | 600.34             | 0.477                          | 834.57             | 397.82             |
| A_68_P29613383 | chr14:55251294-55251338                           | NM_199470:8885         | Cdh24         | INSIDE                 | 0.814                                                        | 2.114                          | 1357.84            | 2870.73            | 1.720                          | 1065.71            | 1833.45            |
| A_68_P28944867 | chr13:35832810-35832854                           | NM_001123386:-438      | Cdyl          | PROMOTER               | 0.814                                                        | 0.548                          | 1368.65            | 749.76             | 0.446                          | 1152.88            | 514.25             |
| A_68_P25186369 | chr7:73254042-73254086                            | NM_001081163:-336      | Chsy1         | PROMOTER               | 0.814                                                        | 0.614                          | 1764.17            | 1082.99            | 0.500                          | 1452.78            | 726.19             |
| A_68_P30347860 | chr15:76199569-76199613                           | NM_021555:263          | Fam203a       | INSIDE                 | 0.814                                                        | 0.558                          | 1106.35            | 617.43             | 0.455                          | 990.92             | 450.40             |
| A_68_P32048649 | chr19:28752873-28752917                           | NM_175459:1673         | Glis3         | INSIDE                 | 0.814                                                        | 0.326                          | 2026.39            | 659.66             | 0.265                          | 1703.27            | 451.43             |
| A_68_P25953597 | chr8:73240870-73240914                            | NM_001195253:-1549     | Gm3336        | PROMOTER               | 0.814                                                        | 2.263                          | 659.54             | 1492.52            | 1.841                          | 553.77             | 1019.58            |
| A_68_P22403735 | chr3:106839334-106839378                          | NM_008418:277          | Kena3         | INSIDE                 | 0.814                                                        | 0.547                          | 1240.57            | 678.25             | 0.445                          | 1076.81            | 478.93             |



| ProbeName      | Target position of probe on CpG island microarray | TargetID                   | GeneSymbol    | CpG island Description | Ratio of relative methylation (TiO <sub>2</sub> -NP/Vehicle) | Sham group                     |                    |                    | TiO <sub>2</sub> -H group      |                    |                    |
|----------------|---------------------------------------------------|----------------------------|---------------|------------------------|--------------------------------------------------------------|--------------------------------|--------------------|--------------------|--------------------------------|--------------------|--------------------|
|                |                                                   |                            |               |                        |                                                              | Relative methylation (Cy5/Cy3) | Cy3 signal (Input) | Cy5 signal (MeDIP) | Relative methylation (Cy5/Cy3) | Cy3 signal (Input) | Cy5 signal (MeDIP) |
| A_68_P24009624 | chr5:115897187-115897231                          | NM_008629:17515            | Msi1          | INSIDE                 | 0.814                                                        | 2.107                          | 610.25             | 1285.56            | 1.715                          | 532.72             | 913.78             |
| A_68_P31958296 | chr19:11952929-11952973                           | NM_001011775-7246          | Olfir1419     | PROMOTER               | 0.814                                                        | 1.766                          | 1185.98            | 2094.63            | 1.437                          | 1045.12            | 1501.60            |
| A_68_P25184946 | chr7:73007817-73007861                            | NM_011048:817              | Peskb         | INSIDE                 | 0.814                                                        | 0.651                          | 1019.07            | 663.41             | 0.530                          | 805.73             | 427.21             |
| A_68_P22582961 | chr3:140874616-140874660                          | NM_008811:681              | Pdha2         | INSIDE                 | 0.814                                                        | 2.864                          | 320.89             | 919.05             | 2.330                          | 268.50             | 625.69             |
| A_68_P32050333 | chr19:29038408-29038452                           | NM_028922:21               | Ppapdc2       | INSIDE                 | 0.814                                                        | 3.000                          | 263.02             | 789.02             | 2.442                          | 278.31             | 679.70             |
| A_68_P24424177 | chr6:47601567-47601611                            | NR_002841:3505             | Rn4.5s        | DOWNSTREAM             | 0.814                                                        | 2.124                          | 4121.65            | 8753.93            | 1.730                          | 4008.40            | 6933.13            |
| A_68_P21704892 | chr2:143836307-143836351                          | NM_024281:671              | Rrbp1         | INSIDE                 | 0.814                                                        | 0.560                          | 1748.77            | 980.02             | 0.456                          | 1488.05            | 678.45             |
| A_68_P20585376 | chr1:127456998-127457042                          | NM_028787:-572             | Slc35f5       | PROMOTER               | 0.814                                                        | 0.412                          | 1423.14            | 586.16             | 0.335                          | 1051.52            | 352.38             |
| A_68_P27533591 | chr10:126467810-126467854                         | NM_025537:38               | Tsfm          | INSIDE                 | 0.814                                                        | 0.564                          | 1271.47            | 716.50             | 0.459                          | 1173.58            | 538.27             |
| A_68_P22964917 | chr4:62180863-62180907                            | NM_008525:213              | Alad          | INSIDE                 | 0.813                                                        | 0.600                          | 2901.92            | 1741.03            | 0.487                          | 2160.01            | 1052.99            |
| A_68_P22058855 | chr3:36470553-36470597                            | NM_009828:344              | Cena2         | INSIDE                 | 0.813                                                        | 0.708                          | 3464.00            | 2453.85            | 0.576                          | 2706.78            | 1558.18            |
| A_68_P26126979 | chr8:106666779-106666826                          | NM_009868:41278            | Cdh5          | INSIDE                 | 0.813                                                        | 2.638                          | 1011.63            | 2668.97            | 2.145                          | 796.31             | 1708.27            |
| A_68_P25677292 | chr8:14894723-14894769                            | NM_012000:6211             | Cln8          | INSIDE                 | 0.813                                                        | 2.853                          | 2042.33            | 5827.35            | 2.320                          | 1312.90            | 3046.01            |
| A_68_P28728196 | chr12:109701593-109701638                         | NM_001043335:40590         | Em11          | INSIDE                 | 0.813                                                        | 1.862                          | 972.80             | 1811.73            | 1.515                          | 717.48             | 1086.99            |
| A_68_P30590963 | chr16:21204850-21204894                           | NM_010143:5                | Ephb3         | INSIDE                 | 0.813                                                        | 0.508                          | 1602.97            | 815.02             | 0.413                          | 1312.40            | 542.27             |
| A_68_P23973158 | chr5:109058614-109058658                          | NM_153569:122              | Gak           | INSIDE                 | 0.813                                                        | 0.684                          | 1092.64            | 747.73             | 0.557                          | 1003.40            | 558.40             |
| A_68_P25890523 | chr8:59800718-59800762                            | NM_010402:961              | Hand2         | INSIDE                 | 0.813                                                        | 0.408                          | 1284.15            | 524.48             | 0.332                          | 1197.46            | 397.67             |
| A_68_P20556979 | chr1:121319156-121319200                          | NM_008381:-353             | Inhbb         | PROMOTER               | 0.813                                                        | 0.631                          | 1367.48            | 862.75             | 0.513                          | 1105.20            | 566.60             |
| A_68_P21840412 | chr2:168094076-168094120                          | NM_001081134:733           | Keng1         | INSIDE                 | 0.813                                                        | 1.742                          | 5555.72            | 9677.14            | 1.416                          | 3828.65            | 5420.34            |
| A_68_P30347565 | chr15:76157913-76157957                           | NR_028283:29               | LOC100302626  | INSIDE                 | 0.813                                                        | 0.514                          | 1117.03            | 574.35             | 0.418                          | 1000.07            | 417.92             |
| A_68_P30496845 | chr15:102078472-102078518                         | NM_001042727:-1711         | Rarg          | PROMOTER               | 0.813                                                        | 3.102                          | 991.33             | 3074.68            | 2.521                          | 710.20             | 1790.41            |
| A_68_P22336401 | chr3:93248647-93248691                            | NM_001163098:2417          | Tehh          | INSIDE                 | 0.813                                                        | 0.599                          | 1005.50            | 601.88             | 0.487                          | 864.68             | 420.73             |
| A_68_P27938059 | chr11:77326725-77326769                           | NM_001024920:29            | Trp53i13      | INSIDE                 | 0.813                                                        | 0.600                          | 3461.57            | 2076.97            | 0.488                          | 2818.63            | 1374.55            |
| A_68_P30284260 | chr15:64753424-64753468                           | NM_009623:412              | Adecy8        | INSIDE                 | 0.812                                                        | 0.697                          | 1410.75            | 983.76             | 0.566                          | 1163.75            | 658.75             |
| A_68_P31097726 | chr17:24642065-24642109                           | NM_027937:16359            | Caskin1       | INSIDE                 | 0.812                                                        | 2.040                          | 583.48             | 1190.42            | 1.656                          | 527.38             | 873.16             |
| A_68_P25843136 | chr8:48798707-48798751                            | NM_172407:557              | Cdkn2aip      | INSIDE                 | 0.812                                                        | 0.544                          | 2411.10            | 1311.01            | 0.441                          | 2199.38            | 970.91             |
| A_68_P31227867 | chr17:50432626-50432673                           | NM_010021:275              | Dazl          | INSIDE                 | 0.812                                                        | 2.909                          | 568.37             | 1653.12            | 2.362                          | 506.03             | 1195.01            |
| A_68_P28575260 | chr12:81440954-81440998                           | NM_177267:96612            | Deaf5         | INSIDE                 | 0.812                                                        | 2.048                          | 1092.65            | 2237.67            | 1.662                          | 829.56             | 1378.81            |
| A_68_P21071850 | chr2:25251471-25251515                            | NM_009849:99               | Entpd2        | INSIDE                 | 0.812                                                        | 0.652                          | 867.39             | 565.96             | 0.530                          | 705.75             | 373.91             |
| A_68_P28080237 | chr11:102417265-102417309                         | NM_001159492:186           | Gpatch8       | INSIDE                 | 0.812                                                        | 0.572                          | 2756.72            | 1575.75            | 0.464                          | 2120.03            | 984.37             |
| A_68_P21339416 | chr2:74601588-74601632                            | NM_010467:574              | Hoxd1         | INSIDE                 | 0.812                                                        | 0.673                          | 1600.51            | 1076.60            | 0.546                          | 1355.64            | 740.02             |
| A_68_P28513153 | chr12:70269731-70269775                           | NM_001081406:-48           | Lrr1          | DIVERGENT_PROMOTER     | 0.812                                                        | 0.572                          | 1318.55            | 754.63             | 0.465                          | 1203.59            | 559.49             |
| A_68_P21611761 | chr2:126959499-126959543                          | NM_144818:170              | Ncaph         | INSIDE                 | 0.812                                                        | 0.705                          | 5180.30            | 3651.13            | 0.572                          | 4208.28            | 2408.93            |
| A_68_P31629837 | chr18:37913139-37913183                           | NM_033594:-2266            | Pcdhga11      | PROMOTER               | 0.812                                                        | 2.617                          | 728.16             | 1905.64            | 2.126                          | 675.81             | 1436.54            |
| A_68_P31791666 | chr18:67561362-67561406                           | NM_026473:11000            | Tubb6         | INSIDE                 | 0.812                                                        | 2.212                          | 3043.21            | 6732.90            | 1.797                          | 2265.52            | 4070.50            |
| A_68_P31925605 | chr19:4878917-4878961                             | NM_001168517:249           | Zdhhc24       | INSIDE                 | 0.812                                                        | 0.592                          | 1247.69            | 738.68             | 0.481                          | 1055.31            | 507.11             |
| A_68_P27288259 | chr10:80702644-80702688                           | NM_001034895:6759          | Zfr2          | INSIDE                 | 0.812                                                        | 2.633                          | 4258.66            | 11212.50           | 2.137                          | 2772.79            | 5926.03            |
| A_68_P26226906 | chr8:123992825-123992870                          | ENSMUST00000127664:1558107 |               | INSIDE                 | 0.812                                                        | 3.315                          | 694.24             | 2301.22            | 2.691                          | 577.83             | 1555.21            |
| A_68_P27288889 | chr10:80788110-80788154                           | NM_027381:4285             | 2510012108Rik | INSIDE                 | 0.811                                                        | 2.487                          | 601.11             | 1495.22            | 2.017                          | 619.03             | 1248.71            |
| A_68_P23225791 | chr4:115457470-115457514                          | NM_181040:-97              | Atpafl        | DIVERGENT_PROMOTER     | 0.811                                                        | 0.683                          | 2251.82            | 1538.51            | 0.574                          | 2050.75            | 1136.43            |
| A_68_P24098214 | chr5:131915626-131915670                          | NM_177047:1102565          | Aut2          | INSIDE                 | 0.811                                                        | 2.899                          | 1738.09            | 5038.31            | 2.352                          | 1297.96            | 3052.40            |
| A_68_P20411440 | chr1:88199681-88199725                            | NM_145222:-93              | B3gnt7        | PROMOTER               | 0.811                                                        | 0.532                          | 1730.14            | 920.77             | 0.432                          | 1343.21            | 579.70             |
| A_68_P24786762 | chr6:118369695-118369739                          | NM_194339:-281             | Bms1          | PROMOTER               | 0.811                                                        | 0.604                          | 1349.03            | 814.57             | 0.490                          | 1079.91            | 529.11             |
| A_68_P25589535 | chr7:148725503-148725549                          | NM_001142681:230           | Chid1         | INSIDE                 | 0.811                                                        | 2.360                          | 4701.82            | 11095.67           | 1.913                          | 2997.19            | 5732.99            |
| A_68_P25535522 | chr7:139788929-139788973                          | NM_009123:2370             | Nkx1-2        | INSIDE                 | 0.811                                                        | 0.572                          | 3907.31            | 2233.34            | 0.464                          | 2929.32            | 1358.17            |
| A_68_P30346542 | chr15:76002933-76002977                           | NM_201394:23186            | Plec          | INSIDE                 | 0.811                                                        | 2.170                          | 733.48             | 1591.59            | 1.761                          | 615.47             | 1083.55            |
| A_68_P30452811 | chr15:94353830-94353874                           | NM_172437:20086            | Pus7l         | INSIDE                 | 0.811                                                        | 2.108                          | 1546.64            | 3260.33            | 1.710                          | 1242.22            | 2124.78            |
| A_68_P30956055 | chr16:90283789-90283833                           | NM_178923:860              | Scaf4         | INSIDE                 | 0.811                                                        | 0.581                          | 884.84             | 514.31             | 0.472                          | 708.61             | 334.13             |
| A_68_P21608667 | chr2:126379090-126379134                          | NM_011978:353              | Slc27a2       | INSIDE                 | 0.811                                                        | 0.600                          | 1535.14            | 921.32             | 0.487                          | 1263.87            | 615.42             |
| A_68_P25235044 | chr7:81649285-81649329                            | NM_001038643:50360         | Slco3a1       | INSIDE                 | 0.811                                                        | 1.982                          | 1126.41            | 2232.41            | 1.608                          | 832.74             | 1339.17            |
| A_68_P22149841 | chr3:54598287-54598331                            | NM_019483:38805            | Smad9         | INSIDE                 | 0.811                                                        | 1.923                          | 1313.74            | 2526.80            | 1.561                          | 1017.77            | 1588.24            |

| ProbeName      | Target position of probe on CpG island microarray | TargetID              | GeneSymbol    | CpG island Description | Ratio of relative methylation (TiO <sub>2</sub> -NP/Vehicle) | Sham group                     |                    |                    | TiO <sub>2</sub> -H group      |                    |                    |
|----------------|---------------------------------------------------|-----------------------|---------------|------------------------|--------------------------------------------------------------|--------------------------------|--------------------|--------------------|--------------------------------|--------------------|--------------------|
|                |                                                   |                       |               |                        |                                                              | Relative methylation (Cy5/Cy3) | Cy3 signal (Input) | Cy5 signal (MeDIP) | Relative methylation (Cy5/Cy3) | Cy3 signal (Input) | Cy5 signal (MeDIP) |
| A_68_P24950521 | chr7:4740854-4740898                              | NM_029384:286         | 2210411K11Rik | INSIDE                 | 0.810                                                        | 0.577                          | 1193.00            | 688.53             | 0.467                          | 996.58             | 465.66             |
| A_68_P23542072 | chr5:23980190-23980234                            | NM_139153:22218       | Agap3         | INSIDE                 | 0.810                                                        | 4.612                          | 750.67             | 3461.75            | 3.734                          | 915.35             | 3417.66            |
| A_68_P23284201 | chr4:126910870-126910914                          | NM_198618:64378       | Dlgap3        | INSIDE                 | 0.810                                                        | 1.937                          | 908.30             | 1759.09            | 1.569                          | 820.33             | 1287.45            |
| A_68_P28577472 | chr12:81859091-81859135                           | NM_001008423:2590     | Gm1568        | INSIDE                 | 0.810                                                        | 2.558                          | 351.66             | 899.57             | 2.072                          | 340.88             | 706.38             |
| A_68_P26810384 | chr9:107579026-107579070                          | NM_008140:2875        | Gnat1         | INSIDE                 | 0.810                                                        | 0.445                          | 1947.30            | 866.57             | 0.360                          | 1585.56            | 571.34             |
| A_68_P24053125 | chr5:123402247-123402291                          | NM_001005866:36274    | Kdm2b         | INSIDE                 | 0.810                                                        | 0.555                          | 4107.41            | 2279.22            | 0.449                          | 3196.83            | 1436.81            |
| A_68_P27282555 | chr10:79798362-79798406                           | NM_001204931:5495     | Reep6         | INSIDE                 | 0.810                                                        | 2.095                          | 4137.15            | 8665.67            | 1.697                          | 2927.22            | 4967.30            |
| A_68_P26574117 | chr9:62994383-62994430                            | NM_172446:381         | Skor1         | INSIDE                 | 0.810                                                        | 2.713                          | 1677.17            | 4549.51            | 2.196                          | 1085.81            | 2384.39            |
| A_68_P28161639 | chr11:116713577-116713621                         | NM_011358:810         | Srsf2         | INSIDE                 | 0.810                                                        | 0.474                          | 2300.98            | 1090.07            | 0.384                          | 1985.14            | 761.65             |
| A_68_P20354641 | chr1:75518362-75518406                            | NM_027886:281         | Stk11ip       | INSIDE                 | 0.810                                                        | 0.606                          | 1089.98            | 660.13             | 0.491                          | 788.50             | 387.02             |
| A_68_P25049871 | chr7:36322745-36322789                            | NM_028034:-3          | Tdrl12        | PROMOTER               | 0.810                                                        | 1.992                          | 1300.41            | 2590.69            | 1.614                          | 1091.78            | 1762.30            |
| A_68_P30388745 | chr15:83319976-83320026                           | NM_178869:21337       | Till1         | INSIDE                 | 0.810                                                        | 2.811                          | 1330.42            | 3740.39            | 2.279                          | 1131.76            | 2578.78            |
| A_68_P31383664 | chr17:80942827-80942871                           | NM_001033443:20326    | Cdk4          | INSIDE                 | 0.809                                                        | 2.206                          | 1142.41            | 2519.93            | 1.784                          | 955.18             | 1703.97            |
| A_68_P29737947 | chr14:77557522-77557566                           | NM_172813:922         | Enox1         | INSIDE                 | 0.809                                                        | 0.712                          | 1395.87            | 994.14             | 0.576                          | 1278.96            | 736.49             |
| A_68_P28888883 | chr13:24853418-24853464                           | NM_020567:366         | Gmmn          | INSIDE                 | 0.809                                                        | 0.634                          | 2224.43            | 1410.30            | 0.513                          | 1910.56            | 979.58             |
| A_68_P24126247 | chr5:137972597-137972641                          | NM_010312:1839        | Gnb2          | INSIDE                 | 0.809                                                        | 3.013                          | 550.47             | 1658.82            | 2.439                          | 497.87             | 1214.36            |
| A_68_P23417688 | chr4:151654062-151654106                          | NM_178406:5614        | Gpr153        | INSIDE                 | 0.809                                                        | 2.096                          | 941.50             | 1973.12            | 1.696                          | 821.65             | 1393.84            |
| A_68_P30332045 | chr15:73526210-73526254                           | NM_173365:11703       | Gpr20         | INSIDE                 | 0.809                                                        | 2.081                          | 2135.78            | 4445.23            | 1.684                          | 1830.62            | 3082.41            |
| A_68_P28981522 | chr13:42144875-42144919                           | NM_007772:-2493       | Hivep1        | PROMOTER               | 0.809                                                        | 0.605                          | 1930.04            | 1166.98            | 0.489                          | 1747.64            | 855.27             |
| A_68_P31201908 | chr17:45710098-45710142                           | NM_008302:90          | Hsp90ab1      | INSIDE                 | 0.809                                                        | 0.591                          | 970.15             | 573.25             | 0.478                          | 858.97             | 410.81             |
| A_68_P25088124 | chr7:51807600-51807645                            | NM_009473:1671        | Nr1h2         | INSIDE                 | 0.809                                                        | 4.922                          | 600.89             | 2957.48            | 3.979                          | 452.34             | 1800.08            |
| A_68_P29696768 | chr14:70107233-70107277                           | NM_001146012:133      | R3hec1        | INSIDE                 | 0.809                                                        | 0.710                          | 1472.39            | 1045.47            | 0.575                          | 1138.80            | 654.40             |
| A_68_P26056688 | chr8:93593942-93593986                            | NM_011250:-28         | Rbl2          | PROMOTER               | 0.809                                                        | 1.871                          | 812.42             | 1520.34            | 1.515                          | 733.28             | 1110.58            |
| A_68_P21420491 | chr2:90910449-90910493                            | NM_026721:-92         | Sic39a13      | PROMOTER               | 0.809                                                        | 0.671                          | 2480.34            | 1664.54            | 0.543                          | 1879.04            | 1020.27            |
| A_68_P23232777 | chr4:116828074-116828118                          | NR_028524:-917        | Snord38a      | PROMOTER               | 0.809                                                        | 0.550                          | 1107.02            | 609.04             | 0.445                          | 817.91             | 364.09             |
| A_68_P27365035 | chr10:94879052-94879097                           | NM_001168655:-228     | Socs2         | PROMOTER               | 0.809                                                        | 0.670                          | 1244.63            | 834.35             | 0.542                          | 902.89             | 489.81             |
| A_68_P30686670 | chr16:38563148-38563193                           | NM_001205287:244      | Tmem39a       | INSIDE                 | 0.809                                                        | 1.679                          | 3066.36            | 5148.75            | 1.358                          | 2307.75            | 3134.03            |
| A_68_P22973923 | chr4:63678590-63678634                            | NM_011607:29437       | Tnc           | INSIDE                 | 0.809                                                        | 1.926                          | 1120.63            | 2158.22            | 1.558                          | 905.01             | 1409.93            |
| A_68_P27780099 | chr11:48630768-48630812                           | NM_145377:103         | Trim41        | INSIDE                 | 0.809                                                        | 0.672                          | 2087.89            | 1403.35            | 0.544                          | 1867.33            | 1014.97            |
| A_68_P21739505 | chr2:150326509-150326553                          | ENSMUST00000121441:51 |               | INSIDE                 | 0.809                                                        | 2.567                          | 846.89             | 2174.05            | 2.078                          | 711.46             | 1478.43            |
| A_68_P22037671 | chr3:32264236-32264280                            | NR_027966:-152        | 4930429B21Rik | PROMOTER               | 0.808                                                        | 0.541                          | 1487.56            | 805.02             | 0.437                          | 1197.62            | 523.63             |
| A_68_P21578340 | chr2:120834005-120834049                          | NM_010761:-117        | Cendbp1       | PROMOTER               | 0.808                                                        | 1.658                          | 7464.74            | 12373.25           | 1.339                          | 5258.71            | 7041.94            |
| A_68_P25092032 | chr7:52496418-52496462                            | NM_007645:-2231       | Cd37          | PROMOTER               | 0.808                                                        | 0.602                          | 2903.59            | 1748.21            | 0.486                          | 2335.67            | 1135.76            |
| A_68_P31350934 | chr17:74715375-74715419                           | NM_001146224:155      | Dpy30         | INSIDE                 | 0.808                                                        | 0.592                          | 2319.89            | 1372.37            | 0.478                          | 1777.73            | 850.02             |
| A_68_P32213508 | chr19:58528871-58528915                           | NM_010279:64          | Gfra1         | INSIDE                 | 0.808                                                        | 0.639                          | 3066.61            | 1958.19            | 0.516                          | 2452.03            | 1265.29            |
| A_68_P30588158 | chr16:20548336-20548380                           | NR_030670:271         | Gm15760       | INSIDE                 | 0.808                                                        | 0.616                          | 3285.40            | 2023.21            | 0.498                          | 2249.22            | 1242.59            |
| A_68_P24687696 | chr6:99642117-99642161                            | NM_008158:-534        | Gpr27         | PROMOTER               | 0.808                                                        | 0.588                          | 1450.95            | 853.32             | 0.475                          | 1147.20            | 544.90             |
| A_68_P23592056 | chr5:34343661-34343705                            | NM_001001985:5050     | Nat8l         | INSIDE                 | 0.808                                                        | 1.815                          | 1118.74            | 2030.72            | 1.467                          | 871.62             | 1278.37            |
| A_68_P21777847 | chr2:157385700-157385749                          | NM_010923:-121        | Nnat          | PROMOTER               | 0.808                                                        | 3.784                          | 1602.45            | 6063.34            | 3.057                          | 1071.00            | 3273.94            |
| A_68_P29729991 | chr14:76186878-76186922                           | NM_026232:-56         | Slec25a30     | PROMOTER               | 0.808                                                        | 0.713                          | 1605.06            | 1144.88            | 0.576                          | 1283.88            | 740.06             |
| A_68_P22313145 | chr3:88136905-88136949                            | NM_024246:1429        | Tmem79        | INSIDE                 | 0.808                                                        | 3.041                          | 2536.21            | 7712.57            | 2.458                          | 1856.71            | 4563.79            |
| A_68_P22766411 | chr4:19636348-19636392                            | NM_177327:-230        | Wwp1          | PROMOTER               | 0.808                                                        | 2.410                          | 754.58             | 1818.32            | 1.946                          | 650.30             | 1265.80            |
| A_68_P21752665 | chr2:152880537-152880585                          | NM_001011732:22973    | Xkr7          | INSIDE                 | 0.808                                                        | 2.442                          | 605.32             | 1478.50            | 1.972                          | 481.40             | 949.50             |
| A_68_P25029849 | chr7:30875328-30875372                            | NM_152814:179         | Zfp566        | INSIDE                 | 0.808                                                        | 0.733                          | 2322.73            | 1701.88            | 0.592                          | 1857.12            | 1099.79            |
| A_68_P20770259 | chr1:163072817-163072861                          | NM_028664:-4          | Ankrd45       | PROMOTER               | 0.807                                                        | 0.430                          | 1277.94            | 549.52             | 0.347                          | 1132.28            | 393.11             |
| A_68_P28752185 | chr12:113977133-113977177                         | NM_001024602:16770    | AW555464      | INSIDE                 | 0.807                                                        | 1.928                          | 2103.28            | 4055.69            | 1.556                          | 1676.72            | 2608.87            |
| A_68_P26554291 | chr9:59451119-59451163                            | NM_175235:24997       | Celf6         | INSIDE                 | 0.807                                                        | 2.773                          | 616.50             | 1709.23            | 2.238                          | 565.95             | 1266.63            |
| A_68_P25784086 | chr8:37209993-37210038                            | NM_172911:52134       | D8Ert82e      | INSIDE                 | 0.807                                                        | 4.372                          | 2118.31            | 9260.84            | 3.530                          | 1446.93            | 5107.13            |
| A_68_P28196937 | chr12:3808024-3808068                             | NM_007872:1067        | Dnmt3a        | INSIDE                 | 0.807                                                        | 0.678                          | 3921.10            | 2658.32            | 0.547                          | 2921.65            | 1597.77            |
| A_68_P28748140 | chr12:113383889-113383933                         | NM_001097621:-508     | Kif26a        | PROMOTER               | 0.807                                                        | 0.661                          | 3053.67            | 2018.82            | 0.534                          | 1990.56            | 1062.45            |
| A_68_P25266279 | chr7:87508205-87508253                            | NM_172903:8033        | Man2a2        | INSIDE                 | 0.807                                                        | 2.538                          | 807.97             | 2050.61            | 2.049                          | 691.90             | 1417.75            |

| ProbeName      | Target position of probe on CpG island microarray | TargetID                 | GeneSymbol | CpG island Description | Ratio of relative methylation (TiO <sub>2</sub> -NP/Vehicle) | Sham group                     |                    |                    | TiO <sub>2</sub> -H group      |                    |                    |
|----------------|---------------------------------------------------|--------------------------|------------|------------------------|--------------------------------------------------------------|--------------------------------|--------------------|--------------------|--------------------------------|--------------------|--------------------|
|                |                                                   |                          |            |                        |                                                              | Relative methylation (Cy5/Cy3) | Cy3 signal (Input) | Cy5 signal (MeDIP) | Relative methylation (Cy5/Cy3) | Cy3 signal (Input) | Cy5 signal (MeDIP) |
| A_68_P26783897 | chr9:103014037-103014081                          | NM_173781:-345           | Rab6b      | PROMOTER               | 0.807                                                        | 0.610                          | 1300.75            | 794.03             | 0.493                          | 1142.38            | 563.00             |
| A_68_P31868118 | chr18:81184539-81184583                           | NM_178280:-1243          | Sall3      | PROMOTER               | 0.807                                                        | 0.607                          | 2104.16            | 1276.96            | 0.489                          | 1642.39            | 803.94             |
| A_68_P25090670 | chr7:52271335-52271379                            | NM_001008422:263         | Scafl1     | INSIDE                 | 0.807                                                        | 0.534                          | 1326.50            | 707.70             | 0.431                          | 986.17             | 424.57             |
| A_68_P29638534 | chr14:60059619-60059663                           | NM_001081024:74          | Setdb2     | INSIDE                 | 0.807                                                        | 0.614                          | 1508.96            | 927.01             | 0.496                          | 1304.70            | 646.66             |
| A_68_P24009788 | chr5:115932764-115932808                          | NM_001167691:1520        | Sirt4      | INSIDE                 | 0.807                                                        | 1.876                          | 879.69             | 1650.20            | 1.513                          | 717.65             | 1086.15            |
| A_68_P28104292 | chr11:106781905-106781949                         | NM_025481:103            | Smurf2     | INSIDE                 | 0.807                                                        | 2.268                          | 492.89             | 1118.10            | 1.830                          | 521.61             | 954.67             |
| A_68_P23364326 | chr4:141034893-141034937                          | NM_019763:59598          | Spn        | INSIDE                 | 0.807                                                        | 2.252                          | 972.21             | 2189.69            | 1.817                          | 819.20             | 1488.62            |
| A_68_P32565191 | chrX:98891432-98891476                            | ENSMUST00000073812:-4265 |            | PROMOTER               | 0.807                                                        | 2.583                          | 1519.39            | 3925.27            | 2.084                          | 681.01             | 1419.40            |
| A_68_P28724512 | chr12:109153627-109153678                         | NM_001079883:87972       | Bcl11b     | INSIDE                 | 0.806                                                        | 1.804                          | 936.23             | 1689.15            | 1.453                          | 817.97             | 1188.83            |
| A_68_P26476240 | chr9:45636562-45636606                            | NM_001081373:137         | Cep164     | INSIDE                 | 0.806                                                        | 0.512                          | 1534.30            | 784.85             | 0.412                          | 1037.93            | 427.74             |
| A_68_P28833517 | chr13:13485882-13485926                           | NM_031999:-13            | Gpr137b    | PROMOTER               | 0.806                                                        | 0.407                          | 1871.33            | 761.26             | 0.328                          | 1767.45            | 579.64             |
| A_68_P22082265 | chr3:40754710-40754754                            | NM_001040399:180         | Larp1b     | INSIDE                 | 0.806                                                        | 0.506                          | 2757.34            | 1394.25            | 0.408                          | 2328.59            | 949.05             |
| A_68_P23912411 | chr5:97821152-97821196                            | NM_001033191:175         | Naa11      | INSIDE                 | 0.806                                                        | 2.737                          | 1392.02            | 3809.31            | 2.204                          | 1113.38            | 2454.21            |
| A_68_P31112754 | chr17:26981531-26981575                           | NM_008700:-3042          | Nkx2-5     | PROMOTER               | 0.806                                                        | 0.664                          | 986.58             | 654.64             | 0.535                          | 872.69             | 466.99             |
| A_68_P23435279 | chr4:154338485-154338529                          | NM_172990:265            | Pank4      | INSIDE                 | 0.806                                                        | 0.748                          | 7008.13            | 5239.65            | 0.603                          | 5440.38            | 3279.40            |
| A_68_P26345841 | chr9:20986277-20986321                            | NM_183408:16141          | Pde4a      | INSIDE                 | 0.806                                                        | 0.658                          | 1422.49            | 935.62             | 0.530                          | 1183.91            | 627.84             |
| A_68_P27287758 | chr10:80616510-80616554                           | NM_021501:13933          | Pias4      | DOWNSTREAM             | 0.806                                                        | 2.582                          | 2208.29            | 5700.80            | 2.082                          | 1656.90            | 3449.48            |
| A_68_P31375199 | chr17:79451854-79451898                           | NM_027455:631            | Qpct       | INSIDE                 | 0.806                                                        | 0.455                          | 1506.96            | 684.94             | 0.366                          | 1250.21            | 457.93             |
| A_68_P30716740 | chr16:43618606-43618656                           | NM_019778:371234         | Zbtb20     | INSIDE                 | 0.806                                                        | 3.225                          | 291.63             | 940.66             | 2.600                          | 266.26             | 692.40             |
| A_68_P28098904 | chr11:105850208-105850252                         | NM_009598:13709          | Ace        | INSIDE                 | 0.805                                                        | 2.153                          | 1263.70            | 2720.57            | 1.733                          | 937.11             | 1623.73            |
| A_68_P27852923 | chr11:62062610-62062654                           | NM_007413:147            | Adora2b    | INSIDE                 | 0.805                                                        | 0.680                          | 1194.85            | 812.29             | 0.548                          | 971.26             | 531.79             |
| A_68_P25956773 | chr8:73929899-73929944                            | NM_172756:11             | Ankle1     | INSIDE                 | 0.805                                                        | 0.690                          | 1234.54            | 851.54             | 0.555                          | 1100.45            | 610.69             |
| A_68_P23915892 | chr5:98460062-98460106                            | NM_133738:-103           | Antxr2     | PROMOTER               | 0.805                                                        | 1.791                          | 1316.54            | 2357.53            | 1.441                          | 1113.46            | 1604.39            |
| A_68_P28182254 | chr11:119947830-119947874                         | NM_009734:289            | Azi1       | INSIDE                 | 0.805                                                        | 2.067                          | 564.97             | 1167.68            | 1.663                          | 491.91             | 818.08             |
| A_68_P31097725 | chr17:24641975-24642019                           | NM_027937:16269          | Caskin1    | INSIDE                 | 0.805                                                        | 2.003                          | 1071.97            | 2147.36            | 1.612                          | 943.99             | 1521.65            |
| A_68_P23600188 | chr5:35731369-35731413                            | NM_010445:-375           | Hmx1       | PROMOTER               | 0.805                                                        | 0.681                          | 1611.39            | 1096.57            | 0.548                          | 1326.77            | 726.76             |
| A_68_P20799110 | chr1:168168534-168168578                          | NM_175296:319            | Mael       | INSIDE                 | 0.805                                                        | 2.481                          | 1173.42            | 2911.52            | 1.997                          | 1091.83            | 2179.88            |
| A_68_P28178598 | chr11:119410881-119410925                         | NM_008730:-1768          | Nptx1      | PROMOTER               | 0.805                                                        | 0.516                          | 1321.71            | 681.65             | 0.415                          | 1150.04            | 477.39             |
| A_68_P26261061 | chr8:129588412-129588456                          | NM_001122850:479         | Pard3      | INSIDE                 | 0.805                                                        | 0.558                          | 2135.35            | 1191.25            | 0.449                          | 1819.34            | 817.11             |
| A_68_P28048198 | chr11:96883375-96883419                           | NM_031183:8514           | Sp6        | INSIDE                 | 0.805                                                        | 0.392                          | 1929.87            | 756.05             | 0.315                          | 1585.22            | 500.04             |
| A_68_P24542637 | chr6:72566597-72566641                            | NM_009444:124            | Tgolin2    | INSIDE                 | 0.805                                                        | 0.612                          | 1873.19            | 1145.82            | 0.493                          | 1377.41            | 678.67             |
| A_68_P25505622 | chr7:134587895-134587939                          | NM_175163:4756           | Zfp689     | INSIDE                 | 0.805                                                        | 3.294                          | 622.58             | 2050.66            | 2.651                          | 573.90             | 1521.20            |
| A_68_P25735802 | chr8:28088218-28088262                            | NM_001101502:433         | Zfp703     | INSIDE                 | 0.805                                                        | 0.429                          | 1964.14            | 843.05             | 0.345                          | 1512.03            | 522.12             |
| A_68_P20793719 | chr1:167212029-167212073                          |                          | Unknown    |                        | 0.805                                                        | 0.565                          | 1190.41            | 672.34             | 0.455                          | 1014.34            | 461.10             |
| A_68_P24944592 | chr6:149302140-149302189                          | ENSMUST00000121073:184   |            | INSIDE                 | 0.805                                                        | 2.213                          | 1004.73            | 2223.04            | 1.781                          | 804.25             | 1432.35            |
| A_68_P30561772 | chr16:14361819-14361863                           | NM_008576:188            | Abec1      | INSIDE                 | 0.804                                                        | 0.550                          | 1946.56            | 1071.20            | 0.442                          | 1706.87            | 754.74             |
| A_68_P28156898 | chr11:115885554-115885598                         | NM_008211:242            | H3f3b      | INSIDE                 | 0.804                                                        | 0.724                          | 1613.93            | 1168.55            | 0.582                          | 1318.44            | 767.42             |
| A_68_P23230436 | chr4:116358568-116358616                          | NM_011034:389            | Prdx1      | INSIDE                 | 0.804                                                        | 0.681                          | 1367.06            | 930.87             | 0.547                          | 1220.62            | 668.25             |
| A_68_P22889711 | chr4:46633603-46633647                            | NM_198664:29447          | Tbc1d2     | INSIDE                 | 0.804                                                        | 2.316                          | 449.16             | 1040.13            | 1.861                          | 395.57             | 736.13             |
| A_68_P25065179 | chr7:38846240-38846284                            | AK181724:13916           |            | INSIDE                 | 0.804                                                        | 0.557                          | 1065.15            | 593.41             | 0.448                          | 924.23             | 414.05             |
| A_68_P32208747 | chr19:57776636-57776680                           | NM_181415:91135          | Atrnl1     | INSIDE                 | 0.803                                                        | 2.043                          | 727.90             | 1486.81            | 1.640                          | 624.45             | 1024.28            |
| A_68_P27480858 | chr10:116813406-116813450                         | NM_001013391:601         | Cpsf6      | INSIDE                 | 0.803                                                        | 0.569                          | 1725.07            | 982.14             | 0.457                          | 1486.65            | 680.06             |
| A_68_P21812643 | chr2:163298309-163298353                          | NM_173397:35             | Fitm2      | INSIDE                 | 0.803                                                        | 0.685                          | 1866.65            | 1279.19            | 0.550                          | 1588.40            | 873.90             |
| A_68_P29134818 | chr13:72768061-72768105                           | NM_010574:1657           | Irx2       | INSIDE                 | 0.803                                                        | 0.589                          | 1517.45            | 893.05             | 0.473                          | 1213.97            | 573.69             |
| A_68_P29603744 | chr14:52533018-52533062                           | NM_001145959:123         | Ndrp2      | INSIDE                 | 0.803                                                        | 0.400                          | 3052.52            | 1221.08            | 0.321                          | 2452.61            | 787.53             |
| A_68_P24432388 | chr6:49345736-49345780                            | NM_029916:156            | Stk31      | INSIDE                 | 0.803                                                        | 2.409                          | 1547.34            | 3727.08            | 1.935                          | 1231.38            | 2383.00            |
| A_68_P21900704 | chr2:179710019-179710063                          | NM_001081092:1311        | Taf4a      | INSIDE                 | 0.803                                                        | 0.565                          | 1031.24            | 582.59             | 0.453                          | 975.21             | 442.22             |
| A_68_P25805593 | chr8:41509486-41509530                            | NM_178395:340            | Zdhhc2     | INSIDE                 | 0.803                                                        | 0.559                          | 1042.91            | 583.03             | 0.449                          | 878.56             | 394.41             |
| A_68_P25009107 | chr7:26010932-26010976                            | NM_175436:4485           | Zfp526     | INSIDE                 | 0.803                                                        | 1.813                          | 1490.63            | 2703.15            | 1.456                          | 1281.94            | 1865.92            |
| A_68_P31256673 | chr17:56651469-56651513                           | NM_011483:416            | Znrf4      | INSIDE                 | 0.803                                                        | 2.633                          | 274.25             | 722.14             | 2.115                          | 266.74             | 564.04             |
| A_68_P21061278 | chr2:22923647-22923691                            | NM_001102436:-52         | Acbd5      | PROMOTER               | 0.802                                                        | 0.700                          | 1291.24            | 904.21             | 0.561                          | 1115.71            | 626.20             |

| ProbeName      | Target position of probe on CpG island microarray | TargetID                | GeneSymbol    | CpG island Description | Ratio of relative methylation (TiO <sub>2</sub> -NP/Vehicle) | Sham group                     |                    |                    | TiO <sub>2</sub> -H group      |                    |                    |
|----------------|---------------------------------------------------|-------------------------|---------------|------------------------|--------------------------------------------------------------|--------------------------------|--------------------|--------------------|--------------------------------|--------------------|--------------------|
|                |                                                   |                         |               |                        |                                                              | Relative methylation (Cy5/Cy3) | Cy3 signal (Input) | Cy5 signal (MeDIP) | Relative methylation (Cy5/Cy3) | Cy3 signal (Input) | Cy5 signal (MeDIP) |
| A_68_P24004992 | chr5:115061116-115061160                          | NM_001004180:42879      | BC057022      | INSIDE                 | 0.802                                                        | 1.940                          | 2152.69            | 4175.61            | 1.557                          | 1573.41            | 2449.08            |
| A_68_P25592831 | chr7:149268090-149268134                          | NM_008748:13077         | Dusp8         | INSIDE                 | 0.802                                                        | 2.104                          | 548.87             | 1154.99            | 1.688                          | 489.26             | 826.00             |
| A_68_P25827836 | chr8:46095713-46095772                            | NM_001081286:60181      | Fat1          | INSIDE                 | 0.802                                                        | 2.370                          | 1018.95            | 2414.46            | 1.899                          | 840.91             | 1597.24            |
| A_68_P29625865 | chr14:57676961-57677005                           | NM_016975:-200          | Gja3          | PROMOTER               | 0.802                                                        | 0.446                          | 1531.27            | 683.57             | 0.358                          | 1320.60            | 472.86             |
| A_68_P30332048 | chr15:73526555-73526599                           | NM_173365:11359         | Gpr20         | INSIDE                 | 0.802                                                        | 4.275                          | 1332.35            | 5695.48            | 3.429                          | 1108.44            | 3801.11            |
| A_68_P23303539 | chr4:130505898-130505942                          | NM_010769:5621          | Matn1         | INSIDE                 | 0.802                                                        | 2.215                          | 724.86             | 1605.38            | 1.776                          | 677.90             | 1203.81            |
| A_68_P26709443 | chr9:88222649-88222693                            | NM_011851:224           | Nt5c          | INSIDE                 | 0.802                                                        | 0.716                          | 1439.48            | 1031.13            | 0.574                          | 1168.88            | 671.31             |
| A_68_P22356138 | chr3:97555598-97555642                            | NM_178080:16317         | Pde4dip       | INSIDE                 | 0.802                                                        | 2.165                          | 1110.03            | 2403.35            | 1.736                          | 926.49             | 1608.66            |
| A_68_P31162033 | chr17:36116300-36116344                           | NR_028516:-354          | Prr3          | PROMOTER               | 0.802                                                        | 0.451                          | 1637.29            | 738.71             | 0.362                          | 1350.99            | 488.73             |
| A_68_P24759853 | chr6:113445166-113445210                          | NM_172487:6624          | Prrt3         | INSIDE                 | 0.802                                                        | 2.014                          | 1921.37            | 3869.54            | 1.614                          | 1581.80            | 2553.77            |
| A_68_P28323157 | chr12:30687355-30687399                           | NM_181395:64476         | Pxdn          | INSIDE                 | 0.802                                                        | 2.150                          | 2239.03            | 4814.49            | 1.724                          | 1524.63            | 2628.58            |
| A_68_P32148714 | chr19:47341896-47341940                           | NM_001164717:196983     | Sh3pxd2a      | INSIDE                 | 0.802                                                        | 1.983                          | 626.77             | 1242.83            | 1.590                          | 546.83             | 869.74             |
| A_68_P24657049 | chr6:94450199-94450243                            | NM_026255:-87           | Slc25a26      | PROMOTER               | 0.802                                                        | 0.594                          | 893.98             | 531.23             | 0.477                          | 680.67             | 324.54             |
| A_68_P27316751 | chr10:86371555-86371599                           | NM_138673:99111         | Stab2         | INSIDE                 | 0.802                                                        | 1.908                          | 1859.11            | 3547.63            | 1.530                          | 1402.97            | 2146.85            |
| A_68_P22861754 | chr4:41296077-41296121                            | NM_023305:70            | Ubp1          | INSIDE                 | 0.802                                                        | 1.747                          | 8809.50            | 15393.21           | 1.401                          | 5994.99            | 8397.22            |
| A_68_P28086886 | chr11:103610912-103610956                         | NM_011719:201           | Wnt9b         | INSIDE                 | 0.802                                                        | 0.642                          | 1356.92            | 870.77             | 0.515                          | 1210.23            | 622.73             |
| A_68_P23081884 | chr4:86520053-86520097                            | NM_139306:-243          | Acer2         | PROMOTER               | 0.801                                                        | 0.494                          | 1545.04            | 763.28             | 0.396                          | 1353.81            | 535.88             |
| A_68_P28155402 | chr11:115664810-115664854                         | NM_080643:10074         | Caskin2       | INSIDE                 | 0.801                                                        | 2.989                          | 927.92             | 2773.96            | 2.394                          | 694.21             | 1662.27            |
| A_68_P21116979 | chr2:32563681-32563725                            | NM_130860:4602          | Cdk9          | INSIDE                 | 0.801                                                        | 2.454                          | 2222.70            | 5455.10            | 1.965                          | 1690.11            | 3320.59            |
| A_68_P25601076 | chr7:150645402-150645446                          | NM_001161624:1531       | Cdkn1c        | INSIDE                 | 0.801                                                        | 2.480                          | 1016.55            | 2520.58            | 1.986                          | 967.73             | 1922.34            |
| A_68_P32130474 | chr19:44181784-44181828                           | NM_001162410:161        | Chuk          | INSIDE                 | 0.801                                                        | 0.575                          | 2933.43            | 1686.37            | 0.460                          | 2560.95            | 1178.71            |
| A_68_P24125354 | chr5:137799067-137799111                          | NM_001159571:7752       | Ephb4         | INSIDE                 | 0.801                                                        | 2.995                          | 748.92             | 2242.75            | 2.398                          | 717.83             | 1721.42            |
| A_68_P28920311 | chr13:31066026-31066075                           | NM_025588:-134          | Exoc2         | PROMOTER               | 0.801                                                        | 2.692                          | 430.81             | 1159.91            | 2.156                          | 322.02             | 694.18             |
| A_68_P25656210 | chr8:11555759-11555803                            | NM_011919:-285          | Ing1          | DIVERGENT_PROMOTER     | 0.801                                                        | 1.811                          | 9106.75            | 16493.52           | 1.451                          | 6002.05            | 8707.05            |
| A_68_P22774361 | chr4:21612852-21612896                            | NM_001080771:236        | Prdm13        | INSIDE                 | 0.801                                                        | 0.551                          | 2543.57            | 1402.01            | 0.442                          | 1902.06            | 840.26             |
| A_68_P21875637 | chr2:174298721-174298768                          | NM_025531:-302          | Slmo2         | PROMOTER               | 0.801                                                        | 0.662                          | 948.97             | 627.81             | 0.530                          | 762.81             | 404.12             |
| A_68_P23523161 | chr5:20388465-20388509                            | NM_177601:216           | Tmem60        | INSIDE                 | 0.801                                                        | 0.674                          | 1080.29            | 728.52             | 0.540                          | 985.78             | 532.29             |
| A_68_P26023616 | chr8:87604506-87604561                            | NM_026399:112           | Wdr83         | INSIDE                 | 0.801                                                        | 0.592                          | 1223.97            | 724.61             | 0.474                          | 902.38             | 428.08             |
| A_68_P23321772 | chr4:133801543-133801587                          | NM_024215:-58           | Zfp593        | PROMOTER               | 0.801                                                        | 0.448                          | 1154.06            | 516.79             | 0.359                          | 951.16             | 341.14             |
| A_68_P26863464 | chr9:117781580-117781624                          | ENSMUST00000126482:-659 |               | PROMOTER               | 0.801                                                        | 0.388                          | 2552.18            | 989.34             | 0.311                          | 2022.79            | 628.23             |
| A_68_P23281043 | chr4:126287319-126287363                          | NM_001013755:243        | 5730409E04Rik | INSIDE                 | 0.800                                                        | 0.449                          | 1199.13            | 538.90             | 0.360                          | 967.05             | 347.80             |
| A_68_P32141576 | chr19:46072976-46073020                           | NM_198296:-20           | 9130011E15Rik | DIVERGENT_PROMOTER     | 0.800                                                        | 0.609                          | 3376.13            | 2054.99            | 0.487                          | 2826.37            | 1375.73            |
| A_68_P23345846 | chr4:138011165-138011209                          | NM_025451:124           | Camk2n1       | INSIDE                 | 0.800                                                        | 0.505                          | 1565.13            | 789.91             | 0.404                          | 1282.71            | 517.92             |
| A_68_P32054107 | chr19:29722618-29722662                           | NM_001081213:270        | Ermp1         | INSIDE                 | 0.800                                                        | 0.604                          | 1081.17            | 653.45             | 0.483                          | 990.71             | 478.77             |
| A_68_P23193225 | chr4:107526982-107527026                          | NM_001080926:52141      | Lrp8          | INSIDE                 | 0.800                                                        | 1.877                          | 1005.88            | 1887.81            | 1.502                          | 799.35             | 1200.73            |
| A_68_P25042628 | chr7:34981548-34981592                            | NM_026549:96            | Pdcd2l        | INSIDE                 | 0.800                                                        | 0.666                          | 3019.70            | 2010.26            | 0.533                          | 2596.07            | 1383.19            |
| A_68_P32185221 | chr19:53977782-53977826                           | NM_001168491:-36        | Pdcd4         | PROMOTER               | 0.800                                                        | 0.571                          | 1108.59            | 633.12             | 0.457                          | 934.92             | 427.19             |
| A_68_P26798485 | chr9:105547166-105547210                          | NM_001081309:1864       | Pik3r4        | INSIDE                 | 0.800                                                        | 3.331                          | 3043.64            | 10137.93           | 2.663                          | 1964.40            | 5231.43            |
| A_68_P31755045 | chr18:61173853-61173897                           | NM_201353:-21           | Slc6a7        | PROMOTER               | 0.800                                                        | 2.380                          | 655.52             | 1560.29            | 1.905                          | 526.23             | 1002.56            |
| A_68_P30642386 | chr16:30550244-30550288                           | NM_172614:398           | Tmem44        | INSIDE                 | 0.800                                                        | 0.612                          | 1917.84            | 1173.52            | 0.490                          | 1469.65            | 719.63             |
| A_68_P30363683 | chr15:78823581-78823625                           | NM_001024716:10117      | Triobp        | INSIDE                 | 0.800                                                        | 2.145                          | 737.46             | 1581.73            | 1.716                          | 588.14             | 1008.97            |
| A_68_P28190094 | chr11:121215805-121215849                         | NM_025793:-65           | Wdr45l        | PROMOTER               | 0.800                                                        | 0.567                          | 2079.26            | 1179.20            | 0.454                          | 1720.77            | 780.82             |
| A_68_P25239813 | chr7:82600787-82600831                            | NM_029332:389           | Akap13        | INSIDE                 | 0.799                                                        | 0.578                          | 2179.06            | 1259.32            | 0.462                          | 1855.18            | 856.43             |
| A_68_P32145201 | chr19:46728817-46728861                           | NM_001177813:30948      | D19Wsu162c    | INSIDE                 | 0.799                                                        | 3.560                          | 941.53             | 3351.46            | 2.845                          | 742.71             | 2113.26            |
| A_68_P20938880 | chr1:193399417-193399461                          | NM_029766:-25           | Dtl           | DIVERGENT_PROMOTER     | 0.799                                                        | 0.499                          | 1957.77            | 977.07             | 0.399                          | 1552.75            | 619.51             |
| A_68_P28577475 | chr12:81859600-81859644                           | NM_001008423:2080       | Gm1568        | INSIDE                 | 0.799                                                        | 2.465                          | 600.90             | 1480.99            | 1.968                          | 613.31             | 1207.12            |
| A_68_P29681797 | chr14:67487667-67487711                           | NM_001034881:2          | Gm5464        | INSIDE                 | 0.799                                                        | 5.802                          | 194.74             | 1129.84            | 4.634                          | 253.50             | 1174.66            |
| A_68_P21536547 | chr2:113598045-113598089                          | NM_011824:739           | Grem1         | INSIDE                 | 0.799                                                        | 0.657                          | 1153.40            | 758.19             | 0.525                          | 991.86             | 520.93             |
| A_68_P24062056 | chr5:125029108-125029152                          | NM_181410:-26           | Gtf2h3        | DIVERGENT_PROMOTER     | 0.799                                                        | 2.135                          | 644.98             | 1376.86            | 1.706                          | 541.57             | 923.70             |
| A_68_P23600185 | chr5:35731082-35731126                            | NM_010445:-661          | Hmx1          | PROMOTER               | 0.799                                                        | 0.681                          | 1746.98            | 1189.53            | 0.544                          | 1283.69            | 698.71             |
| A_68_P31201903 | chr17:45709434-45709478                           | NM_008302:754           | Hsp90ab1      | INSIDE                 | 0.799                                                        | 0.687                          | 1111.52            | 763.76             | 0.549                          | 993.22             | 545.45             |

| ProbeName      | Target position of probe on CpG island microarray | TargetID                 | GeneSymbol    | CpG island Description | Ratio of relative methylation (TiO <sub>2</sub> -NP/Vehicle) | Sham group                     |                    |                    | TiO <sub>2</sub> -H group      |                    |                    |
|----------------|---------------------------------------------------|--------------------------|---------------|------------------------|--------------------------------------------------------------|--------------------------------|--------------------|--------------------|--------------------------------|--------------------|--------------------|
|                |                                                   |                          |               |                        |                                                              | Relative methylation (Cy5/Cy3) | Cy3 signal (Input) | Cy5 signal (MeDIP) | Relative methylation (Cy5/Cy3) | Cy3 signal (Input) | Cy5 signal (MeDIP) |
| A_68_P32466327 | chrX:71330719-71330763                            | NM_010788:192            | Mecp2         | INSIDE                 | 0.799                                                        | 1.683                          | 8983.52            | 15118.27           | 1.345                          | 3774.63            | 5078.48            |
| A_68_P28052175 | chr11:97560549-97560593                           | NM_001163307:128         | Pegf2         | INSIDE                 | 0.799                                                        | 2.687                          | 378.29             | 1016.44            | 2.147                          | 255.46             | 548.52             |
| A_68_P26166524 | chr8:113618170-113618214                          | NM_198308:-452           | Pdpr          | PROMOTER               | 0.799                                                        | 0.647                          | 1087.26            | 703.33             | 0.517                          | 755.27             | 390.35             |
| A_68_P21310713 | chr2:69561124-69561168                            | NM_001081086:2           | Ppig          | INSIDE                 | 0.799                                                        | 0.689                          | 1808.45            | 1246.09            | 0.551                          | 1541.64            | 849.08             |
| A_68_P26702532 | chr9:86910466-86910510                            | NM_001037907:117         | Ripply2       | INSIDE                 | 0.799                                                        | 0.513                          | 5800.32            | 2976.61            | 0.410                          | 5046.40            | 2068.96            |
| A_68_P21796148 | chr2:160471963-160472007                          | NM_009408:352            | Top1          | INSIDE                 | 0.799                                                        | 0.456                          | 1977.87            | 902.59             | 0.365                          | 1698.63            | 619.55             |
| A_68_P24630038 | chr6:89785494-89785538                            | NM_053221:10015          | Vmn1r42       | DOWNSTREAM             | 0.799                                                        | 5.436                          | 1341.77            | 7293.64            | 4.345                          | 1087.16            | 4724.09            |
| A_68_P30386395 | chr15:82887268-82887312                           | AK139602:181917          |               | INSIDE                 | 0.799                                                        | 0.679                          | 1274.74            | 865.51             | 0.543                          | 1096.49            | 594.89             |
| A_68_P20262086 | chr1:59177080-59177125                            | NM_001033449:-162        | Als2cr4       | PROMOTER               | 0.798                                                        | 0.620                          | 2541.24            | 1575.66            | 0.495                          | 2065.36            | 1022.11            |
| A_68_P26402548 | chr9:31720871-31720915                            | NM_013800:-22            | Barx2         | PROMOTER               | 0.798                                                        | 0.653                          | 1290.75            | 843.30             | 0.521                          | 1026.58            | 535.12             |
| A_68_P23767828 | chr5:67819201-67819245                            | NM_001164806:-184        | Bend4         | PROMOTER               | 0.798                                                        | 0.612                          | 1430.84            | 875.71             | 0.488                          | 1459.17            | 712.60             |
| A_68_P31201121 | chr17:45570773-45570817                           | NM_152810:-138           | Cdc5l         | PROMOTER               | 0.798                                                        | 1.746                          | 4553.17            | 7950.95            | 1.394                          | 3570.96            | 4977.73            |
| A_68_P20613815 | chr1:133034491-133034535                          | NM_145508:299            | Dyrk3         | INSIDE                 | 0.798                                                        | 0.388                          | 1903.91            | 737.79             | 0.309                          | 1538.30            | 475.86             |
| A_68_P23279079 | chr4:125933821-125933865                          | NM_001145970:-279        | Mtap7d1       | DIVERGENT_PROMOTER     | 0.798                                                        | 0.681                          | 1148.67            | 781.68             | 0.543                          | 968.11             | 525.62             |
| A_68_P25981541 | chr8:79709878-79709922                            | NM_001083906:283494      | Nr3c2         | INSIDE                 | 0.798                                                        | 2.496                          | 1077.38            | 2689.56            | 1.991                          | 864.39             | 1721.08            |
| A_68_P25065936 | chr7:39006581-39006625                            | NM_024413:6411           | Plekhf1       | INSIDE                 | 0.798                                                        | 2.635                          | 2722.24            | 7171.96            | 2.102                          | 2169.77            | 4618.03            |
| A_68_P29042000 | chr13:53214301-53214345                           | NM_013846:167156         | Ror2          | INSIDE                 | 0.798                                                        | 1.893                          | 963.91             | 1825.06            | 1.510                          | 729.40             | 1101.72            |
| A_68_P26133226 | chr8:107873426-107873470                          | NM_001081332:1291        | Sle9a5        | INSIDE                 | 0.798                                                        | 0.685                          | 1043.02            | 714.22             | 0.547                          | 837.35             | 457.77             |
| A_68_P25445803 | chr7:123175462-123175506                          | NM_001025560:-923        | Sox6          | PROMOTER               | 0.798                                                        | 0.629                          | 1124.99            | 707.92             | 0.502                          | 1006.17            | 505.51             |
| A_68_P27629549 | chr11:19921210-19921254                           | NM_033523:96788          | Spred2        | INSIDE                 | 0.798                                                        | 1.751                          | 1621.89            | 2839.58            | 1.397                          | 1347.94            | 1883.09            |
| A_68_P28871499 | chr13:21272176-21272220                           | NM_009054:371            | Trim27        | INSIDE                 | 0.798                                                        | 2.924                          | 426.51             | 1247.26            | 2.334                          | 489.79             | 1143.02            |
| A_68_P31204668 | chr17:46168904-46168948                           | NM_001110266:-6814       | Vegfa         | PROMOTER               | 0.798                                                        | 0.551                          | 2313.40            | 1274.51            | 0.440                          | 1706.61            | 750.23             |
| A_68_P29102506 | chr13:65358717-65358761                           | ENSMUST00000099425:-2108 |               | PROMOTER               | 0.798                                                        | 2.456                          | 665.42             | 1634.22            | 1.961                          | 629.23             | 1233.73            |
| A_68_P26807153 | chr9:107133795-107133839                          | NM_153413:424            | Dock3         | INSIDE                 | 0.797                                                        | 0.582                          | 1231.47            | 716.20             | 0.464                          | 1086.53            | 503.91             |
| A_68_P22318570 | chr3:89125764-89125808                            | NM_010108:1015           | Efn3          | INSIDE                 | 0.797                                                        | 2.052                          | 20287.54           | 41635.05           | 1.636                          | 14433.25           | 23617.11           |
| A_68_P20969130 | chr2:4524621-4524665                              | NM_001177844:43843       | Frdm4a        | INSIDE                 | 0.797                                                        | 2.848                          | 835.02             | 2378.06            | 2.270                          | 738.84             | 1677.31            |
| A_68_P31116318 | chr17:27571972-27572016                           | NM_001013385:68255       | Grm4          | INSIDE                 | 0.797                                                        | 2.700                          | 2479.07            | 6694.18            | 2.153                          | 1852.75            | 3988.77            |
| A_68_P25494602 | chr7:132588659-132588703                          | NM_029842:547            | Mjmd5         | INSIDE                 | 0.797                                                        | 0.701                          | 1806.94            | 1266.91            | 0.559                          | 1361.71            | 761.25             |
| A_68_P30480086 | chr15:99256305-99256349                           | NM_001001884:31853       | Nekap5l       | INSIDE                 | 0.797                                                        | 2.717                          | 980.19             | 2662.97            | 2.166                          | 799.74             | 1732.11            |
| A_68_P32326386 | chrX:35474728-35474772                            | NM_001185002:734         | Rhox13        | INSIDE                 | 0.797                                                        | 2.716                          | 566.46             | 1538.67            | 2.165                          | 271.12             | 586.98             |
| A_68_P31003192 | chr17:3114390-3114434                             | NM_134123:-559           | Scaf8         | PROMOTER               | 0.797                                                        | 0.591                          | 2644.18            | 1562.64            | 0.471                          | 2228.16            | 1049.01            |
| A_68_P22185876 | chr3:61962735-61962779                            |                          |               | Unknown                | 0.797                                                        | 4.051                          | 1323.34            | 5360.40            | 3.227                          | 1239.79            | 4000.71            |
| A_68_P25262394 | chr7:86805544-86805588                            | NM_029835:485            | 5730590G19Rik | INSIDE                 | 0.796                                                        | 0.337                          | 1510.27            | 508.32             | 0.268                          | 1334.12            | 357.21             |
| A_68_P23205991 | chr4:110070245-110070289                          | NM_001048189:-129        | Agbl4         | PROMOTER               | 0.796                                                        | 10.775                         | 953.54             | 10274.64           | 8.573                          | 815.62             | 6992.58            |
| A_68_P30579475 | chr16:18398299-18398343                           | NM_033474:49954          | Arvcf         | INSIDE                 | 0.796                                                        | 1.852                          | 1251.60            | 2317.39            | 1.474                          | 994.31             | 1465.14            |
| A_68_P31423369 | chr17:87845478-87845522                           | NM_007589:775            | Calm2         | INSIDE                 | 0.796                                                        | 2.222                          | 360.58             | 801.38             | 1.768                          | 403.73             | 713.97             |
| A_68_P23202004 | chr4:109338719-109338763                          | NM_007671:-763           | Cdkn2c        | PROMOTER               | 0.796                                                        | 0.522                          | 1423.08            | 742.48             | 0.415                          | 1145.94            | 475.68             |
| A_68_P23284202 | chr4:126910975-126911019                          | NM_198618:64482          | Dlgap3        | INSIDE                 | 0.796                                                        | 1.910                          | 1835.76            | 3505.62            | 1.520                          | 1524.51            | 2316.91            |
| A_68_P23203753 | chr4:109652919-109652963                          | NM_172296:2311           | Dmrt2         | INSIDE                 | 0.796                                                        | 0.598                          | 1113.65            | 666.16             | 0.476                          | 971.34             | 462.25             |
| A_68_P30641169 | chr16:30309242-30309286                           | NM_008148:1601           | Gp5           | INSIDE                 | 0.796                                                        | 0.683                          | 1115.88            | 762.56             | 0.544                          | 1105.36            | 600.98             |
| A_68_P32152321 | chr19:47929609-47929653                           | NM_010362:152            | Gsto1         | INSIDE                 | 0.796                                                        | 0.547                          | 1185.96            | 648.15             | 0.435                          | 973.70             | 423.48             |
| A_68_P29485181 | chr14:27928181-27928226                           | NM_134437:76017          | Il17rd        | DOWNSTREAM             | 0.796                                                        | 0.597                          | 1185.03            | 707.41             | 0.475                          | 1063.32            | 505.54             |
| A_68_P21816598 | chr2:163994001-163994045                          | NM_008435:2827           | Kens1         | INSIDE                 | 0.796                                                        | 0.504                          | 1052.16            | 529.83             | 0.401                          | 841.30             | 337.16             |
| A_68_P30359964 | chr15:78267418-78267462                           | NM_001081367:8383        | Ketd17        | INSIDE                 | 0.796                                                        | 1.953                          | 8458.99            | 16521.82           | 1.555                          | 5692.08            | 8852.67            |
| A_68_P26346111 | chr9:21043277-21043321                            | NM_001110305:478         | Keap1         | INSIDE                 | 0.796                                                        | 2.041                          | 549.63             | 1122.04            | 1.625                          | 556.77             | 904.85             |
| A_68_P27282830 | chr10:79844326-79844370                           | NM_198615:6048           | Mex3d         | INSIDE                 | 0.796                                                        | 3.507                          | 3056.13            | 10718.42           | 2.792                          | 2223.38            | 6207.88            |
| A_68_P27282472 | chr10:79786332-79786376                           | NM_008793:5864           | Pesk4         | INSIDE                 | 0.796                                                        | 0.724                          | 3463.79            | 2508.81            | 0.576                          | 2649.31            | 1527.29            |
| A_68_P20681325 | chr1:145851425-145851469                          | NM_009061:-167           | Rgs2          | PROMOTER               | 0.796                                                        | 0.688                          | 1239.00            | 852.32             | 0.548                          | 1023.20            | 560.37             |
| A_68_P24008785 | chr5:115722817-115722861                          | NM_016698:66             | Rnf10         | INSIDE                 | 0.796                                                        | 1.891                          | 855.83             | 1618.00            | 1.504                          | 692.45             | 1041.78            |
| A_68_P28683727 | chr12:101963505-101963549                         | NM_153587:-288           | Rps6ka5       | PROMOTER               | 0.796                                                        | 0.501                          | 1697.03            | 849.39             | 0.398                          | 1454.97            | 579.78             |
| A_68_P31411763 | chr17:86021219-86021263                           | NM_011381:1067           | Six3          | INSIDE                 | 0.796                                                        | 0.523                          | 1300.12            | 680.15             | 0.417                          | 1118.43            | 465.95             |

| ProbeName      | Target position of probe on CpG island microarray | TargetID               | GeneSymbol    | CpG island Description | Ratio of relative methylation (TiO <sub>2</sub> -NP/Vehicle) | Sham group                     |                    |                    | TiO <sub>2</sub> -H group      |                    |                    |
|----------------|---------------------------------------------------|------------------------|---------------|------------------------|--------------------------------------------------------------|--------------------------------|--------------------|--------------------|--------------------------------|--------------------|--------------------|
|                |                                                   |                        |               |                        |                                                              | Relative methylation (Cy5/Cy3) | Cy3 signal (Input) | Cy5 signal (MeDIP) | Relative methylation (Cy5/Cy3) | Cy3 signal (Input) | Cy5 signal (MeDIP) |
| A_68_P28708613 | chr12:106575627-106575671                         | ENSMUST00000138649:446 |               | INSIDE                 | 0.796                                                        | 0.737                          | 3065.22            | 2259.34            | 0.587                          | 2148.30            | 1260.30            |
| A_68_P23392563 | chr4:147504999-147505043                          | NM_027426:-213         | 2610109H07Rik | DIVERGENT_PROMOTER     | 0.795                                                        | 1.898                          | 1119.45            | 2124.81            | 1.509                          | 1062.99            | 1603.94            |
| A_68_P27289154 | chr10:80827741-80827785                           | NM_001014836:803       | 4930404N11Rik | INSIDE                 | 0.795                                                        | 0.636                          | 1596.04            | 1015.24            | 0.506                          | 1240.29            | 627.06             |
| A_68_P25656688 | chr8:11635549-11635593                            | NR_030781:-534         | Ankrd10       | PROMOTER               | 0.795                                                        | 0.617                          | 1129.90            | 697.66             | 0.491                          | 1027.37            | 504.46             |
| A_68_P23770432 | chr5:68238811-68238855                            | NM_001038999:-162      | Atp8a1        | PROMOTER               | 0.795                                                        | 0.421                          | 2562.61            | 1079.58            | 0.335                          | 1867.00            | 625.57             |
| A_68_P24631556 | chr6:90259867-90259911                            | NM_027928:15291        | Chst13        | INSIDE                 | 0.795                                                        | 2.233                          | 747.00             | 1668.32            | 1.775                          | 590.45             | 1047.93            |
| A_68_P24780086 | chr6:117119255-117119299                          | NM_021704:724          | Cxc112        | INSIDE                 | 0.795                                                        | 0.650                          | 1017.40            | 661.01             | 0.516                          | 775.09             | 400.31             |
| A_68_P26274325 | chr9:3532341-3532385                              | NM_001033322:9         | Gucy1a2       | INSIDE                 | 0.795                                                        | 0.412                          | 3746.97            | 1544.94            | 0.328                          | 2853.81            | 935.09             |
| A_68_P30991213 | chr16:96349447-96349491                           | NM_008251:-136         | Hmgn1         | PROMOTER               | 0.795                                                        | 0.579                          | 3884.42            | 2247.93            | 0.460                          | 3347.10            | 1540.61            |
| A_68_P28784064 | chr12:120476208-120476252                         | NM_177290:519          | Irgb8         | INSIDE                 | 0.795                                                        | 0.549                          | 1275.00            | 699.72             | 0.436                          | 1048.21            | 457.44             |
| A_68_P20058167 | chr1:17088173-17088217                            | NM_020604:-224         | Jph1          | PROMOTER               | 0.795                                                        | 0.453                          | 1399.94            | 634.59             | 0.360                          | 1148.82            | 414.01             |
| A_68_P23303540 | chr4:130506009-130506056                          | NM_010769:5733         | Matn1         | INSIDE                 | 0.795                                                        | 2.635                          | 781.43             | 2059.33            | 2.096                          | 665.69             | 1395.03            |
| A_68_P24152140 | chr5:143005995-143006039                          | NM_019943:14           | Pap0lb        | INSIDE                 | 0.795                                                        | 2.355                          | 982.80             | 2314.36            | 1.873                          | 879.56             | 1647.52            |
| A_68_P24609842 | chr6:86338816-86338860                            | NM_025823:8306         | Peyox1        | INSIDE                 | 0.795                                                        | 3.382                          | 1443.73            | 4882.72            | 2.687                          | 1095.70            | 2944.20            |
| A_68_P27911822 | chr11:72302639-72302683                           | NM_153060:746          | Spns2         | INSIDE                 | 0.795                                                        | 0.639                          | 2023.29            | 1293.55            | 0.508                          | 1566.35            | 795.77             |
| A_68_P31093837 | chr17:23956103-23956154                           | NM_175229:15975        | Srrm2         | INSIDE                 | 0.795                                                        | 2.644                          | 476.53             | 1259.81            | 2.102                          | 378.38             | 795.31             |
| A_68_P20346376 | chr1:74083629-74083673                            | NM_027884:87371        | Tns1          | INSIDE                 | 0.795                                                        | 0.690                          | 1437.73            | 992.17             | 0.549                          | 1212.12            | 664.97             |
| A_68_P33005896 | A_68_P33005896                                    |                        |               | Unknown                | 0.795                                                        | 3.378                          | 223.35             | 754.56             | 2.685                          | 198.56             | 533.14             |
| A_68_P30364603 | chr15:78971259-78971303                           | NM_138581:401          | 1700088E04Rik | INSIDE                 | 0.794                                                        | 0.518                          | 1044.62            | 540.70             | 0.411                          | 835.86             | 343.32             |
| A_68_P31144956 | chr17:32457857-32457902                           | NM_019774:219          | Akap8         | INSIDE                 | 0.794                                                        | 0.527                          | 1405.83            | 741.14             | 0.458                          | 1103.77            | 462.30             |
| A_68_P23410171 | chr4:150482915-150482959                          | NM_001081557:752941    | Camta1        | INSIDE                 | 0.794                                                        | 2.028                          | 594.78             | 1206.29            | 1.610                          | 573.96             | 923.95             |
| A_68_P23205807 | chr4:110024246-110024290                          | NM_001163397:248       | Elavl4        | INSIDE                 | 0.794                                                        | 0.577                          | 1060.55            | 611.88             | 0.458                          | 881.15             | 403.47             |
| A_68_P26828613 | chr9:111174392-111174436                          | NM_175266:66           | Epm2aip1      | INSIDE                 | 0.794                                                        | 0.588                          | 1199.42            | 705.57             | 0.467                          | 1029.65            | 480.81             |
| A_68_P31382678 | chr17:80772747-80772791                           | NR_028385:114          | Gm10190       | INSIDE                 | 0.794                                                        | 2.048                          | 678.83             | 1389.99            | 1.626                          | 645.52             | 1049.33            |
| A_68_P30332047 | chr15:73526357-73526401                           | NM_173365:11557        | Gpr20         | INSIDE                 | 0.794                                                        | 3.669                          | 5254.41            | 19277.74           | 2.913                          | 3668.75            | 10685.37           |
| A_68_P31116319 | chr17:27572063-27572107                           | NM_001013385:68165     | Grm4          | INSIDE                 | 0.794                                                        | 1.951                          | 1667.99            | 3253.90            | 1.548                          | 1167.90            | 1808.19            |
| A_68_P31849646 | chr18:78006372-78006416                           | NM_146089:125          | Haus1         | INSIDE                 | 0.794                                                        | 0.550                          | 1895.70            | 1042.42            | 0.436                          | 1607.94            | 701.63             |
| A_68_P32135961 | chr19:45100549-45100593                           | NM_001130526:7946      | Lzts2         | INSIDE                 | 0.794                                                        | 2.257                          | 1283.96            | 2897.43            | 1.791                          | 1021.10            | 1828.80            |
| A_68_P22312504 | chr3:88018933-88018977                            | NR_037276:-138         | Mir3093       | PROMOTER               | 0.794                                                        | 0.553                          | 1277.46            | 706.36             | 0.439                          | 1009.13            | 442.94             |
| A_68_P25979817 | chr8:79425933-79425977                            | NM_001083906:-452      | Nr3c2         | DIVERGENT_PROMOTER     | 0.794                                                        | 0.666                          | 950.33             | 633.19             | 0.529                          | 737.22             | 390.13             |
| A_68_P30346597 | chr15:76009753-76009797                           | NM_201394:16366        | Plec          | INSIDE                 | 0.794                                                        | 2.036                          | 835.40             | 1700.92            | 1.616                          | 651.84             | 1053.21            |
| A_68_P26476665 | chr9:45714864-45714908                            | NM_178709:74           | Rnf124        | INSIDE                 | 0.794                                                        | 0.303                          | 2121.81            | 642.80             | 0.240                          | 1499.34            | 360.53             |
| A_68_P23993057 | chr5:113006567-113006611                          | NM_019982:-383         | Sez6l         | PROMOTER               | 0.794                                                        | 0.475                          | 1214.56            | 576.44             | 0.377                          | 918.12             | 345.94             |
| A_68_P25954772 | chr8:73416640-73416684                            | NM_053248:-6           | Slc5a5        | PROMOTER               | 0.794                                                        | 0.677                          | 1330.86            | 901.21             | 0.538                          | 1074.17            | 577.90             |
| A_68_P29645531 | chr14:61253807-61253851                           | NM_001033272:263       | Spata13       | INSIDE                 | 0.794                                                        | 0.710                          | 2260.45            | 1604.20            | 0.564                          | 1912.91            | 1078.36            |
| A_68_P22321610 | chr3:89577295-89577339                            | NM_027315:-214         | Ube2q1        | DIVERGENT_PROMOTER     | 0.794                                                        | 0.559                          | 1747.18            | 976.55             | 0.444                          | 1467.44            | 650.99             |
| A_68_P32977627 | A_68_P32977627                                    |                        |               | Unknown                | 0.794                                                        | 3.117                          | 379.87             | 1183.90            | 2.473                          | 265.55             | 656.77             |
| A_68_P27263122 | chr10:76077175-76077220                           | NM_146007:8952         | Col6a2        | INSIDE                 | 0.793                                                        | 2.678                          | 1143.96            | 3063.33            | 2.123                          | 834.94             | 1772.23            |
| A_68_P25539010 | chr7:140314266-140314310                          | NM_009980:878          | Ctbp2         | INSIDE                 | 0.793                                                        | 0.364                          | 1853.86            | 675.08             | 0.289                          | 1450.57            | 418.95             |
| A_68_P24600272 | chr6:84534727-84534771                            | NM_175475:9056         | Cyp26b1       | INSIDE                 | 0.793                                                        | 0.624                          | 1409.22            | 879.80             | 0.495                          | 1184.35            | 586.09             |
| A_68_P21489530 | chr2:104334257-104334301                          | NM_001145824:368       | Hipk3         | INSIDE                 | 0.793                                                        | 0.705                          | 3121.46            | 2199.53            | 0.559                          | 2319.50            | 1296.18            |
| A_68_P25474218 | chr7:128644164-128644208                          | NM_001081327:108377    | Hs3st2        | INSIDE                 | 0.793                                                        | 1.925                          | 1093.34            | 2104.96            | 1.527                          | 762.61             | 1164.55            |
| A_68_P23971132 | chr5:108741872-108741916                          | NM_001081234:-49       | Pigg          | PROMOTER               | 0.793                                                        | 0.639                          | 1191.92            | 761.88             | 0.507                          | 899.34             | 456.02             |
| A_68_P31106621 | chr17:25974180-25974224                           | NM_144816:-130         | Rhbdl1        | PROMOTER               | 0.793                                                        | 0.696                          | 2187.16            | 1521.95            | 0.552                          | 1768.71            | 975.91             |
| A_68_P27985860 | chr11:85699977-85700021                           | NM_011536:-3566        | Tbx4          | PROMOTER               | 0.793                                                        | 0.624                          | 863.08             | 538.16             | 0.495                          | 689.49             | 341.04             |
| A_68_P30596852 | chr16:22265731-22265775                           | NM_009186:250          | Tra2b         | INSIDE                 | 0.793                                                        | 0.714                          | 1921.62            | 1372.20            | 0.566                          | 1550.19            | 877.31             |
| A_68_P28813406 | chr13:8870643-8870687                             | NM_172445:-376         | Wdr37         | PROMOTER               | 0.793                                                        | 0.625                          | 1133.03            | 707.63             | 0.495                          | 862.26             | 426.85             |
| A_68_P26158628 | chr8:112248320-112248367                          | NM_029468:18356        | Zfp821        | INSIDE                 | 0.793                                                        | 3.930                          | 860.67             | 3382.67            | 3.116                          | 688.30             | 2144.48            |
| A_68_P27933039 | chr11:76414995-76415040                           | ENSMUST00000136893:197 |               | INSIDE                 | 0.793                                                        | 2.961                          | 265.10             | 785.01             | 2.348                          | 240.70             | 565.18             |
| A_68_P24605101 | chr6:85402012-85402056                            | NR_028081:-70          | 1700040I03Rik | PROMOTER               | 0.792                                                        | 0.580                          | 968.47             | 562.01             | 0.459                          | 840.88             | 386.30             |
| A_68_P20858583 | chr1:179188004-179188048                          | NM_011785:-9128        | Akt3          | PROMOTER               | 0.792                                                        | 0.405                          | 1341.82            | 543.79             | 0.321                          | 1219.65            | 391.34             |

| ProbeName      | Target position of probe on CpG island microarray | TargetID               | GeneSymbol    | CpG island Description | Ratio of relative methylation (TiO <sub>2</sub> -NP/Vehicle) | Sham group                     |                    |                    | TiO <sub>2</sub> -H group      |                    |                    |
|----------------|---------------------------------------------------|------------------------|---------------|------------------------|--------------------------------------------------------------|--------------------------------|--------------------|--------------------|--------------------------------|--------------------|--------------------|
|                |                                                   |                        |               |                        |                                                              | Relative methylation (Cy5/Cy3) | Cy3 signal (Input) | Cy5 signal (MeDIP) | Relative methylation (Cy5/Cy3) | Cy3 signal (Input) | Cy5 signal (MeDIP) |
| A_68_P23418304 | chr4:151737452-151737496                          | NM_001081376:24715     | Chd5          | INSIDE                 | 0.792                                                        | 2.085                          | 926.93             | 1932.40            | 1.651                          | 667.66             | 1102.28            |
| A_68_P20354315 | chr1:75472667-75472712                            | NM_001001565:3357      | Chpf          | INSIDE                 | 0.792                                                        | 3.588                          | 777.09             | 2788.22            | 2.843                          | 626.69             | 1781.89            |
| A_68_P26538931 | chr9:56712893-56712937                            | NM_139001:4            | Cspg4         | INSIDE                 | 0.792                                                        | 0.446                          | 1808.57            | 807.23             | 0.354                          | 1312.23            | 463.95             |
| A_68_P23342967 | chr4:137514113-137514157                          | NM_199307:95983        | Eec1          | INSIDE                 | 0.792                                                        | 2.825                          | 1300.11            | 3672.81            | 2.237                          | 957.14             | 2141.12            |
| A_68_P25278636 | chr7:89796890-89796934                            | NM_177894:126          | Fam154b       | INSIDE                 | 0.792                                                        | 0.508                          | 1195.75            | 607.22             | 0.402                          | 871.66             | 350.63             |
| A_68_P25507080 | chr7:134895891-134895935                          | NM_172748:5624         | Fbx119        | INSIDE                 | 0.792                                                        | 1.967                          | 2795.93            | 5498.53            | 1.558                          | 2221.01            | 3460.87            |
| A_68_P32127028 | chr19:43598925-43598969                           | NM_010324:149          | Got1          | INSIDE                 | 0.792                                                        | 0.554                          | 1466.38            | 811.66             | 0.439                          | 1218.46            | 534.30             |
| A_68_P29187682 | chr13:83884651-83884695                           | NR_029545:6254         | Mir9-2        | DOWNSTREAM             | 0.792                                                        | 2.460                          | 679.05             | 1670.33            | 1.947                          | 657.41             | 1280.03            |
| A_68_P26164571 | chr8:113262720-113262764                          | NM_198625:17359        | Mtss11        | INSIDE                 | 0.792                                                        | 2.028                          | 959.92             | 1947.04            | 1.606                          | 789.18             | 1267.44            |
| A_68_P25094159 | chr7:52887970-52888014                            | NM_028544:5086         | Rasip1        | INSIDE                 | 0.792                                                        | 2.842                          | 277.30             | 788.16             | 2.252                          | 299.84             | 675.24             |
| A_68_P25398385 | chr7:114353404-114353448                          | NM_029660:468          | Rbmxl2        | INSIDE                 | 0.792                                                        | 1.810                          | 887.32             | 1605.61            | 1.433                          | 879.29             | 1259.86            |
| A_68_P28033655 | chr11:94410319-94410363                           | NM_001013381:181       | Rsad1         | INSIDE                 | 0.792                                                        | 0.587                          | 1387.97            | 815.09             | 0.465                          | 1161.65            | 540.60             |
| A_68_P25959795 | chr8:74659320-74659364                            | NM_001001491:152       | Tpm4          | INSIDE                 | 0.792                                                        | 0.644                          | 1410.60            | 908.00             | 0.510                          | 1082.34            | 552.04             |
| A_68_P21538595 | chr2:114027026-114027070                          | NM_175466:120          | Zfp770        | INSIDE                 | 0.792                                                        | 0.533                          | 2007.10            | 1069.73            | 0.422                          | 1470.72            | 620.75             |
| A_68_P21710713 | chr2:144994120-144994164                          | ENSMUST00000153249:488 |               | INSIDE                 | 0.792                                                        | 0.591                          | 1023.36            | 605.18             | 0.468                          | 917.92             | 429.82             |
| A_68_P24098212 | chr5:131915457-131915501                          | NM_177047:1102735      | Auts2         | INSIDE                 | 0.791                                                        | 2.045                          | 1315.98            | 2691.60            | 1.618                          | 1063.18            | 1719.72            |
| A_68_P28356773 | chr12:36883113-36883157                           | NM_025840:278          | Bzw2          | INSIDE                 | 0.791                                                        | 0.629                          | 1086.66            | 683.52             | 0.497                          | 992.86             | 493.68             |
| A_68_P30588036 | chr16:20531197-20531241                           | NM_007889:14082        | Dvl3          | INSIDE                 | 0.791                                                        | 2.107                          | 1027.71            | 2165.25            | 1.666                          | 856.30             | 1426.49            |
| A_68_P24673423 | chr6:97437832-97437876                            | NM_145148:129797       | Frmcd4b       | INSIDE                 | 0.791                                                        | 0.680                          | 1301.11            | 884.71             | 0.538                          | 1185.88            | 637.55             |
| A_68_P27137438 | chr10:52101546-52101590                           | NM_001199272:362       | Gopc          | INSIDE                 | 0.791                                                        | 0.530                          | 1080.03            | 572.02             | 0.419                          | 923.77             | 387.10             |
| A_68_P23955548 | chr5:105910054-105910098                          | NM_001033550:65283     | Lrre8b        | INSIDE                 | 0.791                                                        | 2.457                          | 916.13             | 2251.13            | 1.945                          | 723.96             | 1407.89            |
| A_68_P25954898 | chr8:73438225-73438269                            | NM_173013:8374         | Mtap1s        | INSIDE                 | 0.791                                                        | 1.970                          | 756.75             | 1490.61            | 1.558                          | 632.31             | 985.10             |
| A_68_P30356221 | chr15:77671902-77671946                           | NM_022410:621          | Myh9          | INSIDE                 | 0.791                                                        | 0.430                          | 1553.78            | 668.10             | 0.340                          | 1287.05            | 437.78             |
| A_68_P28614435 | chr12:88488792-88488836                           | NM_153415:38           | Pomt2         | INSIDE                 | 0.791                                                        | 0.677                          | 1172.39            | 793.41             | 0.535                          | 926.12             | 495.69             |
| A_68_P23281396 | chr4:126355179-126355223                          | NM_011970:314          | Psmb2         | INSIDE                 | 0.791                                                        | 0.607                          | 1124.22            | 681.91             | 0.480                          | 962.02             | 461.52             |
| A_68_P29716892 | chr14:73725013-73725057                           | NM_009029:564          | Rb1           | INSIDE                 | 0.791                                                        | 0.652                          | 832.61             | 542.45             | 0.515                          | 721.34             | 371.84             |
| A_68_P28730242 | chr12:110074008-110074052                         | NM_181328:56           | Ste25a29      | INSIDE                 | 0.791                                                        | 0.512                          | 1280.31            | 655.94             | 0.405                          | 1136.94            | 460.91             |
| A_68_P26239401 | chr8:125877966-125878010                          | NM_172287:21376        | Spire2        | INSIDE                 | 0.791                                                        | 3.222                          | 1162.72            | 3746.67            | 2.550                          | 913.94             | 2330.27            |
| A_68_P31655792 | chr18:42671854-42671899                           | NM_001039474:736       | Tceerg1       | INSIDE                 | 0.791                                                        | 0.360                          | 1569.99            | 565.91             | 0.285                          | 1191.52            | 339.63             |
| A_68_P27290698 | chr10:81050747-81050791                           | NM_019725:12492        | Tle2          | INSIDE                 | 0.791                                                        | 1.858                          | 1519.75            | 2823.53            | 1.470                          | 1246.50            | 1832.78            |
| A_68_P26037059 | chr8:90304768-90304819                            | NM_033327:178701       | Zfp423        | INSIDE                 | 0.791                                                        | 2.850                          | 807.87             | 2302.24            | 2.255                          | 601.27             | 1355.90            |
| A_68_P22942709 | chr4:57002896-57002940                            | NM_001142965:345       | 6430704M03Rik | INSIDE                 | 0.790                                                        | 0.617                          | 1460.89            | 901.20             | 0.487                          | 1195.78            | 582.74             |
| A_68_P30434242 | chr15:91029845-91029889                           | NM_011994:-7628        | Abcd2         | PROMOTER               | 0.790                                                        | 2.489                          | 1613.79            | 4017.53            | 1.967                          | 1266.43            | 2491.19            |
| A_68_P24761383 | chr6:113708921-113708965                          | NM_001036684:132428    | Atp2b2        | INSIDE                 | 0.790                                                        | 2.435                          | 693.73             | 1688.99            | 1.924                          | 554.09             | 1066.02            |
| A_68_P27677358 | chr11:29924538-29924582                           | NM_146016:1473         | Eml6          | INSIDE                 | 0.790                                                        | 0.667                          | 1639.53            | 1093.25            | 0.527                          | 1278.20            | 673.67             |
| A_68_P22058735 | chr3:36451526-36451570                            | NM_019393:21           | Exosc9        | INSIDE                 | 0.790                                                        | 0.617                          | 997.54             | 615.09             | 0.487                          | 820.44             | 399.84             |
| A_68_P23404235 | chr4:149461799-149461843                          | NM_177366:209          | Gpr157        | INSIDE                 | 0.790                                                        | 0.657                          | 3643.79            | 2393.97            | 0.519                          | 2725.60            | 1414.51            |
| A_68_P28069613 | chr11:100569782-100569828                         | NM_001038010:3977      | Kat2a         | INSIDE                 | 0.790                                                        | 5.559                          | 775.22             | 4309.77            | 4.392                          | 627.80             | 2757.55            |
| A_68_P20023666 | chr1:9690703-9690747                              | NM_008651:-434         | Mybl1         | PROMOTER               | 0.790                                                        | 0.524                          | 3346.48            | 1752.69            | 0.414                          | 3102.25            | 1284.09            |
| A_68_P30346023 | chr15:75922119-75922163                           | NM_144847:-1697        | Nrbp2         | PROMOTER               | 0.790                                                        | 0.705                          | 1829.34            | 1289.71            | 0.557                          | 1466.43            | 817.24             |
| A_68_P21888791 | chr2:177877035-177877079                          | NM_028806:419          | Phactr3       | INSIDE                 | 0.790                                                        | 0.420                          | 2300.94            | 967.19             | 0.332                          | 1857.84            | 616.67             |
| A_68_P26554814 | chr9:59528143-59528187                            | NM_011099:23750        | Pkm2          | DOWNSTREAM             | 0.790                                                        | 0.632                          | 1250.01            | 789.45             | 0.499                          | 921.89             | 459.76             |
| A_68_P26429009 | chr9:36953011-36953055                            | NM_001029838:1819      | Pknox2        | INSIDE                 | 0.790                                                        | 0.706                          | 1508.41            | 1065.30            | 0.558                          | 1284.52            | 716.81             |
| A_68_P26477010 | chr9:45763375-45763419                            | NM_172257:-64          | Sid2          | PROMOTER               | 0.790                                                        | 0.572                          | 891.47             | 509.66             | 0.452                          | 799.21             | 360.94             |
| A_68_P29097414 | chr13:64253902-64253946                           | NM_175494:583          | Zfp367        | INSIDE                 | 0.790                                                        | 1.997                          | 650.41             | 1299.11            | 1.578                          | 661.52             | 1044.01            |
| A_68_P30345226 | chr15:75805450-75805494                           | NM_001081065:5858      | Zfp707        | INSIDE                 | 0.790                                                        | 2.397                          | 2579.78            | 6182.57            | 1.892                          | 1825.64            | 3454.93            |
| A_68_P20443148 | chr1:93437540-93437584                            | NM_023046:-94          | Asb1          | PROMOTER               | 0.789                                                        | 0.655                          | 871.23             | 570.53             | 0.517                          | 703.02             | 363.33             |
| A_68_P21073894 | chr2:25562637-25562681                            | NM_023326:260          | Bmyc          | INSIDE                 | 0.789                                                        | 0.470                          | 1640.08            | 770.07             | 0.371                          | 1461.61            | 541.58             |
| A_68_P30135995 | chr15:35867423-35867467                           | NM_053071:557          | Cox6c         | INSIDE                 | 0.789                                                        | 0.464                          | 2393.16            | 1109.45            | 0.366                          | 2147.25            | 784.98             |
| A_68_P24758531 | chr6:113232209-113232253                          | NM_170673:-70          | Cpne9         | PROMOTER               | 0.789                                                        | 0.619                          | 1004.33            | 621.87             | 0.489                          | 797.67             | 389.88             |
| A_68_P23317855 | chr4:133042356-133042402                          | NM_175307:6331         | Fam46b        | INSIDE                 | 0.789                                                        | 1.913                          | 1472.11            | 2815.59            | 1.509                          | 1133.38            | 1710.07            |

| ProbeName      | Target position of probe on CpG island microarray | TargetID           | GeneSymbol    | CpG island Description | Ratio of relative methylation (TiO <sub>2</sub> -NP/Vehicle) | Sham group                     |                    |                    | TiO <sub>2</sub> -H group      |                    |                    |
|----------------|---------------------------------------------------|--------------------|---------------|------------------------|--------------------------------------------------------------|--------------------------------|--------------------|--------------------|--------------------------------|--------------------|--------------------|
|                |                                                   |                    |               |                        |                                                              | Relative methylation (Cy5/Cy3) | Cy3 signal (Input) | Cy5 signal (MeDIP) | Relative methylation (Cy5/Cy3) | Cy3 signal (Input) | Cy5 signal (MeDIP) |
| A_68_P21576347 | chr2:120454717-120454761                          | NM_025475:19567    | Haus2         | DOWNSTREAM             | 0.789                                                        | 2.642                          | 2677.27            | 7073.22            | 2.085                          | 2001.75            | 4174.41            |
| A_68_P31156848 | chr17:35114489-35114533                           | NM_013558:4863     | Hspa11        | INSIDE                 | 0.789                                                        | 1.920                          | 803.94             | 1543.33            | 1.514                          | 724.85             | 1097.51            |
| A_68_P21834170 | chr2:167013596-167013640                          | NM_008420:681      | Kenb1         | INSIDE                 | 0.789                                                        | 3.617                          | 2033.38            | 7354.66            | 2.852                          | 1488.81            | 4246.35            |
| A_68_P31117526 | chr17:27760252-27760296                           | NM_019837:123      | Nudt3         | INSIDE                 | 0.789                                                        | 0.683                          | 1380.78            | 942.97             | 0.539                          | 1295.70            | 698.51             |
| A_68_P21909035 | chr2:180922349-180922393                          | NM_025598:323      | Ppdpf         | INSIDE                 | 0.789                                                        | 0.688                          | 1682.40            | 1158.08            | 0.543                          | 1473.69            | 800.30             |
| A_68_P31415738 | chr17:86657395-86657443                           | NM_011104:90294    | Prkce         | INSIDE                 | 0.789                                                        | 3.234                          | 783.34             | 2533.10            | 2.551                          | 531.58             | 1356.00            |
| A_68_P23313960 | chr4:132324400-132324444                          | NM_011284:148      | Rpa2          | INSIDE                 | 0.789                                                        | 1.754                          | 5586.66            | 9799.81            | 1.384                          | 4250.62            | 5882.97            |
| A_68_P28957528 | chr13:38022622-38022667                           | NM_001177869:41905 | Rreb1         | INSIDE                 | 0.789                                                        | 2.709                          | 1096.74            | 2971.03            | 2.137                          | 843.17             | 1801.78            |
| A_68_P30348904 | chr15:76353697-76353741                           | NM_130893:-1159    | Sert1         | PROMOTER               | 0.789                                                        | 0.638                          | 1553.60            | 991.47             | 0.504                          | 1207.32            | 608.05             |
| A_68_P27934858 | chr11:76759228-76759272                           | NM_178645:93       | Blimh         | INSIDE                 | 0.788                                                        | 0.470                          | 1111.37            | 522.06             | 0.370                          | 944.39             | 349.45             |
| A_68_P27980568 | chr11:84771399-84771443                           | NM_007607:165      | Car4          | INSIDE                 | 0.788                                                        | 0.592                          | 1038.07            | 614.29             | 0.467                          | 870.02             | 405.90             |
| A_68_P23321455 | chr4:133742851-133742895                          | NM_144527:128      | Ccdc21        | INSIDE                 | 0.788                                                        | 0.438                          | 3592.35            | 1573.61            | 0.345                          | 2581.22            | 890.61             |
| A_68_P21715593 | chr2:145760272-145760316                          | NM_025820:142      | Crmk1         | INSIDE                 | 0.788                                                        | 0.650                          | 838.52             | 545.14             | 0.512                          | 713.61             | 365.44             |
| A_68_P24620370 | chr6:88149892-88149936                            | NM_008090:1257     | Gata2         | INSIDE                 | 0.788                                                        | 0.517                          | 1237.67            | 640.47             | 0.408                          | 983.22             | 401.08             |
| A_68_P23329299 | chr4:135126083-135126127                          | NM_001013756:3431  | Grhl3         | INSIDE                 | 0.788                                                        | 0.455                          | 1543.51            | 702.24             | 0.359                          | 1260.49            | 452.16             |
| A_68_P31317443 | chr17:68623323-68623367                           | NM_177278:208      | L3mbtl4       | INSIDE                 | 0.788                                                        | 0.522                          | 1924.87            | 1004.77            | 0.411                          | 1540.18            | 633.73             |
| A_68_P25269267 | chr7:88049772-88049816                            | NM_026523:163      | Nmb           | INSIDE                 | 0.788                                                        | 0.668                          | 916.30             | 611.98             | 0.526                          | 693.99             | 365.35             |
| A_68_P25096455 | chr7:53289295-53289339                            | NM_153057:251      | Nomo1         | INSIDE                 | 0.788                                                        | 0.561                          | 1743.90            | 977.57             | 0.442                          | 1286.58            | 568.68             |
| A_68_P31442550 | chr17:91488113-91488157                           | NM_020252:4008     | Nrxn1         | INSIDE                 | 0.788                                                        | 2.731                          | 1459.43            | 3985.64            | 2.152                          | 1145.37            | 2464.51            |
| A_68_P21565426 | chr2:118503248-118503292                          | NM_001145854:289   | Pak6          | INSIDE                 | 0.788                                                        | 0.523                          | 2039.39            | 1066.82            | 0.412                          | 1637.26            | 675.04             |
| A_68_P24933416 | chr6:147212616-147212660                          | NM_008970:-31      | Pthlh         | PROMOTER               | 0.788                                                        | 0.599                          | 1023.17            | 613.39             | 0.473                          | 892.46             | 421.82             |
| A_68_P26540099 | chr9:56924722-56924766                            | NM_001110350:562   | Sin3a         | INSIDE                 | 0.788                                                        | 0.550                          | 1674.60            | 920.86             | 0.433                          | 1265.53            | 548.47             |
| A_68_P21440995 | chr2:94246447-94246491                            | NM_183106:378      | Ttc17         | INSIDE                 | 0.788                                                        | 0.672                          | 1305.52            | 876.73             | 0.529                          | 1175.59            | 622.09             |
| A_68_P23984451 | chr5:111652451-111652495                          | NM_024477:343651   | Tie28         | INSIDE                 | 0.788                                                        | 2.366                          | 650.78             | 1539.93            | 1.864                          | 570.04             | 1062.46            |
| A_68_P26154344 | chr8:111480628-111480672                          | NM_007496:242107   | Zfx3          | INSIDE                 | 0.788                                                        | 3.113                          | 8966.03            | 27910.81           | 2.453                          | 6223.44            | 15264.81           |
| A_68_P26335719 | chr9:17902437-17902481                            |                    | Unknown       |                        | 0.788                                                        | 2.073                          | 908.93             | 1884.09            | 1.634                          | 774.15             | 1265.04            |
| A_68_P26595466 | chr9:66682276-66682320                            | NM_026674:215      | Aph1c         | INSIDE                 | 0.787                                                        | 0.499                          | 1417.17            | 706.66             | 0.392                          | 1076.92            | 422.69             |
| A_68_P21109232 | chr2:31315774-31315818                            | NM_007494:-9993    | Ass1          | PROMOTER               | 0.787                                                        | 0.604                          | 905.63             | 547.20             | 0.475                          | 781.03             | 371.34             |
| A_68_P23818506 | chr5:77287203-77287247                            | NM_001163793:17601 | C530008M17Rik | INSIDE                 | 0.787                                                        | 2.830                          | 1138.95            | 3223.46            | 2.229                          | 843.00             | 1878.70            |
| A_68_P27643752 | chr11:22891041-22891085                           | NM_009837:470      | Cet4          | INSIDE                 | 0.787                                                        | 1.990                          | 1152.09            | 2292.21            | 1.565                          | 887.39             | 1389.17            |
| A_68_P23973400 | chr5:109089732-109089776                          | NM_199011:34       | Dgkq          | INSIDE                 | 0.787                                                        | 0.708                          | 1557.49            | 1102.01            | 0.557                          | 1314.02            | 731.50             |
| A_68_P33015626 | chr1_random:51169-51219                           | NM_026866:134144   | Disp1         | INSIDE                 | 0.787                                                        | 2.366                          | 924.83             | 2187.80            | 1.862                          | 779.59             | 1451.60            |
| A_68_P26431143 | chr9:37338011-37338055                            | NM_027102:2359     | Esam          | INSIDE                 | 0.787                                                        | 0.452                          | 1385.70            | 626.46             | 0.356                          | 1237.98            | 440.35             |
| A_68_P25641013 | chr8:9207908-9207952                              | NM_173446:563093   | Fam155a       | INSIDE                 | 0.787                                                        | 1.962                          | 1645.18            | 3228.57            | 1.545                          | 1218.05            | 1881.97            |
| A_68_P21073090 | chr2:25433092-25433136                            | NM_001005424:2505  | Gm996         | INSIDE                 | 0.787                                                        | 0.665                          | 977.20             | 650.04             | 0.524                          | 809.10             | 423.68             |
| A_68_P28043962 | chr11:96207315-96207359                           | NM_010458:2254     | Hoxb3         | INSIDE                 | 0.787                                                        | 0.611                          | 3005.71            | 1835.01            | 0.480                          | 2386.44            | 1145.97            |
| A_68_P21833675 | chr2:166930471-166930515                          | NM_008420:83807    | Kenb1         | INSIDE                 | 0.787                                                        | 3.179                          | 2570.88            | 8173.89            | 2.504                          | 2075.55            | 5196.67            |
| A_68_P25279953 | chr7:90016571-90016615                            | NM_175366:750      | Mex3b         | INSIDE                 | 0.787                                                        | 0.572                          | 1006.50            | 575.24             | 0.450                          | 847.80             | 381.21             |
| A_68_P29094230 | chr13:63673702-63673746                           | NM_008957:-6896    | Ptch1         | PROMOTER               | 0.787                                                        | 0.528                          | 1078.78            | 569.35             | 0.415                          | 851.06             | 353.30             |
| A_68_P24992503 | chr7:19878546-19878590                            | NM_001025364:2121  | Rtn2          | INSIDE                 | 0.787                                                        | 1.907                          | 1070.52            | 2041.20            | 1.502                          | 792.46             | 1189.88            |
| A_68_P22151536 | chr3:54916119-54916163                            | NM_001144987:53    | Spg20         | INSIDE                 | 0.787                                                        | 0.611                          | 1275.02            | 778.62             | 0.481                          | 1182.67            | 568.67             |
| A_68_P20708501 | chr1:152240022-152240066                          | NM_133780:77       | Tpr           | INSIDE                 | 0.787                                                        | 0.698                          | 1664.96            | 1162.22            | 0.549                          | 1367.92            | 751.41             |
| A_68_P24162462 | chr5:145528953-145528997                          | NM_001081362:-686  | Ttrap         | DIVERGENT_PROMOTER     | 0.787                                                        | 0.548                          | 1260.57            | 690.69             | 0.431                          | 1131.86            | 488.21             |
| A_68_P22321613 | chr3:89577798-89577842                            | NM_027315:290      | Ube2q1        | INSIDE                 | 0.787                                                        | 2.050                          | 619.19             | 1269.03            | 1.613                          | 530.83             | 856.41             |
| A_68_P31259847 | chr17:57201924-57201968                           | NM_177638:247      | Crb3          | INSIDE                 | 0.786                                                        | 0.474                          | 1823.65            | 863.88             | 0.372                          | 1980.49            | 737.02             |
| A_68_P25083575 | chr7:50930997-50931041                            | NM_145582:3618     | Ctu1          | INSIDE                 | 0.786                                                        | 2.155                          | 607.06             | 1307.94            | 1.694                          | 510.47             | 864.92             |
| A_68_P30387020 | chr15:83002487-83002532                           | NM_029787:129      | Cyb5r3        | INSIDE                 | 0.786                                                        | 0.674                          | 963.18             | 649.22             | 0.530                          | 875.50             | 463.99             |
| A_68_P28067609 | chr11:100216864-100216908                         | NM_010404:569      | Hap1          | INSIDE                 | 0.786                                                        | 0.704                          | 1896.72            | 1335.55            | 0.553                          | 1513.43            | 837.62             |
| A_68_P28071795 | chr11:100940981-100941025                         | NM_010475:1278     | Hsd17b1       | INSIDE                 | 0.786                                                        | 2.495                          | 405.84             | 1012.56            | 1.961                          | 338.52             | 663.73             |
| A_68_P29615710 | chr14:55633787-55633831                           | NM_026890:-482     | Ngdn          | PROMOTER               | 0.786                                                        | 0.695                          | 1628.30            | 1131.71            | 0.546                          | 1263.05            | 689.66             |
| A_68_P23118557 | chr4:94269595-94269639                            | NM_172695:322      | Plaa          | INSIDE                 | 0.786                                                        | 0.484                          | 1427.52            | 690.46             | 0.380                          | 1186.84            | 451.20             |



| ProbeName      | Target position of probe on CpG island microarray | TargetID                | GeneSymbol    | CpG island Description | Ratio of relative methylation (TiO <sub>2</sub> -NP/Vehicle) | Sham group                     |                    |                    | TiO <sub>2</sub> -H group      |                    |                    |
|----------------|---------------------------------------------------|-------------------------|---------------|------------------------|--------------------------------------------------------------|--------------------------------|--------------------|--------------------|--------------------------------|--------------------|--------------------|
|                |                                                   |                         |               |                        |                                                              | Relative methylation (Cy5/Cy3) | Cy3 signal (Input) | Cy5 signal (MeDIP) | Relative methylation (Cy5/Cy3) | Cy3 signal (Input) | Cy5 signal (MeDIP) |
| A_68_P28958210 | chr13:38129314-38129358                           | NM_024242:479           | Riok1         | INSIDE                 | 0.786                                                        | 0.471                          | 1316.71            | 619.71             | 0.370                          | 1022.77            | 378.17             |
| A_68_P28642153 | chr9:57352112-57352156                            | NM_133982:226           | Rpp25         | INSIDE                 | 0.786                                                        | 0.452                          | 2150.27            | 972.86             | 0.356                          | 1731.46            | 615.65             |
| A_68_P21597423 | chr2:124435474-124435518                          | NM_172537:-535          | Sema6d        | PROMOTER               | 0.786                                                        | 0.631                          | 1709.03            | 1078.93            | 0.496                          | 1407.64            | 698.35             |
| A_68_P21820791 | chr2:164793332-164793376                          | NM_020333:-133          | Slc12a5       | PROMOTER               | 0.786                                                        | 0.305                          | 1936.61            | 590.40             | 0.240                          | 1698.09            | 407.05             |
| A_68_P28094594 | chr11:105026351-105026396                         | ENSMUST00000118770:1561 |               | INSIDE                 | 0.786                                                        | 3.683                          | 2301.27            | 8475.40            | 2.896                          | 1631.93            | 4726.09            |
| A_68_P28353676 | chr12:36219581-36219625                           | NM_013464:59            | Ahr           | INSIDE                 | 0.785                                                        | 0.686                          | 1265.01            | 867.82             | 0.539                          | 1008.86            | 543.38             |
| A_68_P22186535 | chr3:62143067-62143111                            | NM_001081295:390        | Arhgef26      | INSIDE                 | 0.785                                                        | 0.680                          | 1014.99            | 690.23             | 0.534                          | 891.54             | 475.73             |
| A_68_P29020698 | chr13:48761248-48761292                           | NM_007526:2866          | Barx1         | INSIDE                 | 0.785                                                        | 0.536                          | 1175.24            | 630.03             | 0.421                          | 970.69             | 408.71             |
| A_68_P24397200 | chr6:42215074-42215118                            | NM_007610:59            | Casp2         | INSIDE                 | 0.785                                                        | 2.617                          | 3449.54            | 9029.06            | 2.056                          | 2443.25            | 5022.20            |
| A_68_P27677369 | chr11:29925854-29925898                           | NM_146016:157           | Eml6          | INSIDE                 | 0.785                                                        | 0.255                          | 2570.45            | 655.84             | 0.200                          | 2238.13            | 448.55             |
| A_68_P25289618 | chr7:91754406-91754450                            | NM_010176:24            | Fah           | INSIDE                 | 0.785                                                        | 2.492                          | 11138.49           | 27761.34           | 1.957                          | 7746.14            | 15162.73           |
| A_68_P24046888 | chr5:122302574-122302618                          | NM_175474:3560          | Fam109a       | INSIDE                 | 0.785                                                        | 1.892                          | 921.33             | 1743.44            | 1.485                          | 755.11             | 1120.99            |
| A_68_P25951053 | chr8:72839794-72839838                            | NM_001163282:143        | Gdf1          | INSIDE                 | 0.785                                                        | 0.622                          | 859.29             | 534.52             | 0.488                          | 716.81             | 350.03             |
| A_68_P30473863 | chr15:98087348-98087392                           | NM_027304:368           | H1fnt         | INSIDE                 | 0.785                                                        | 2.290                          | 757.85             | 1735.62            | 1.798                          | 648.21             | 1165.37            |
| A_68_P28567643 | chr12:80190635-80190679                           | NM_029988:1             | Pigh          | INSIDE                 | 0.785                                                        | 0.533                          | 1316.70            | 701.67             | 0.418                          | 1164.44            | 486.83             |
| A_68_P20852903 | chr1:178204921-178204965                          | NM_176916:501           | Pld5          | INSIDE                 | 0.785                                                        | 0.599                          | 1459.78            | 874.96             | 0.471                          | 1177.74            | 554.22             |
| A_68_P28946214 | chr13:36061069-36061113                           | NM_029628:1316          | Ppp1r3g       | INSIDE                 | 0.785                                                        | 2.438                          | 538.32             | 1312.50            | 1.914                          | 467.54             | 894.87             |
| A_68_P27924764 | chr11:75007008-75007052                           | NM_177708:-464          | Rtn4rl1       | DIVERGENT_PROMOTER     | 0.785                                                        | 0.553                          | 5084.91            | 2810.76            | 0.434                          | 3777.54            | 1638.58            |
| A_68_P25512303 | chr7:135888587-135888631                          | NM_001029982:225        | Sec23ip       | INSIDE                 | 0.785                                                        | 0.703                          | 1214.88            | 854.60             | 0.552                          | 996.46             | 549.92             |
| A_68_P21635426 | chr2:131346286-131346330                          | NM_001177833:28711      | Smox          | INSIDE                 | 0.785                                                        | 2.231                          | 515.87             | 1150.70            | 1.752                          | 543.24             | 951.72             |
| A_68_P32092159 | chr19:36908711-36908755                           | NM_001163635:11         | Tnks2         | INSIDE                 | 0.785                                                        | 2.479                          | 690.28             | 1711.35            | 1.945                          | 643.41             | 1251.44            |
| A_68_P21710706 | chr2:144993149-144993193                          | ENSMUST00000110007:-319 |               | PROMOTER               | 0.785                                                        | 0.731                          | 2122.66            | 1552.53            | 0.574                          | 1645.08            | 944.26             |
| A_68_P22289848 | chr3:84063239-84063283                            | ENSMUST00000147901:31   |               | INSIDE                 | 0.785                                                        | 0.487                          | 5121.18            | 2492.89            | 0.382                          | 4179.99            | 1596.63            |
| A_68_P22061571 | chr3:36962331-36962381                            | NM_009350:-221          | Adad1         | PROMOTER               | 0.784                                                        | 3.972                          | 915.55             | 3636.40            | 3.115                          | 712.04             | 2217.72            |
| A_68_P28680130 | chr12:101369148-101369192                         | NM_183155:28693         | BC002230      | INSIDE                 | 0.784                                                        | 1.912                          | 1364.53            | 2609.26            | 1.500                          | 1186.17            | 1779.01            |
| A_68_P31125953 | chr17:29235369-29235414                           | NM_007669:4675          | Cdkn1a        | INSIDE                 | 0.784                                                        | 2.063                          | 962.51             | 1985.83            | 1.618                          | 807.60             | 1307.07            |
| A_68_P28051747 | chr11:97491171-97491215                           | NM_175332:-162          | E130012A19Rik | PROMOTER               | 0.784                                                        | 1.987                          | 5633.44            | 11196.28           | 1.559                          | 4539.81            | 7075.96            |
| A_68_P21903063 | chr2:180068623-180068667                          | NM_008093:740           | Gata5         | INSIDE                 | 0.784                                                        | 0.435                          | 1414.92            | 615.09             | 0.341                          | 1302.30            | 443.91             |
| A_68_P27794865 | chr11:51419667-51419711                           | NM_001048061:695        | Hnrpab        | INSIDE                 | 0.784                                                        | 0.646                          | 2508.22            | 1619.65            | 0.506                          | 2054.21            | 1039.81            |
| A_68_P30477337 | chr15:98748179-98748223                           | NM_029098:329           | Lmbr11        | INSIDE                 | 0.784                                                        | 0.518                          | 1305.31            | 675.76             | 0.406                          | 1167.71            | 474.18             |
| A_68_P24012822 | chr5:116474390-116474434                          | NM_031869:25            | Prkab1        | INSIDE                 | 0.784                                                        | 0.574                          | 1454.25            | 834.91             | 0.450                          | 1227.45            | 552.31             |
| A_68_P20796002 | chr1:167637880-167637924                          | NM_001038846:323        | Rcsd1         | INSIDE                 | 0.784                                                        | 0.498                          | 1441.05            | 716.99             | 0.390                          | 1139.18            | 444.23             |
| A_68_P22871555 | chr4:43429277-43429321                            | NM_199057:9853          | Rusc2         | INSIDE                 | 0.784                                                        | 2.019                          | 745.96             | 1505.77            | 1.582                          | 627.14             | 992.43             |
| A_68_P32021815 | chr19:24205388-24205432                           | NM_001198985:43220      | Tjp2          | INSIDE                 | 0.784                                                        | 2.008                          | 1023.81            | 2055.52            | 1.574                          | 917.83             | 1444.56            |
| A_68_P24819776 | chr6:125235862-125235906                          | NM_009446:176           | Tuba3a        | INSIDE                 | 0.784                                                        | 2.101                          | 514.93             | 1081.71            | 1.646                          | 486.31             | 800.69             |
| A_68_P21084617 | chr2:27281328-27281372                            | NM_009500:995           | Vav2          | INSIDE                 | 0.784                                                        | 0.550                          | 3355.40            | 1845.98            | 0.431                          | 2589.20            | 1116.20            |
| A_68_P20940739 | chr1:193731090-193731134                          | NR_030669:294           | 1700034H15Rik | INSIDE                 | 0.783                                                        | 0.581                          | 1422.83            | 826.96             | 0.455                          | 1174.09            | 534.49             |
| A_68_P28046786 | chr11:96650730-96650774                           | NM_007622:303           | Cbx1          | INSIDE                 | 0.783                                                        | 0.466                          | 1151.24            | 536.75             | 0.365                          | 1002.65            | 365.83             |
| A_68_P24631549 | chr6:90258988-90259041                            | NM_027928:16165         | Chst13        | INSIDE                 | 0.783                                                        | 3.001                          | 427.30             | 1282.39            | 2.350                          | 400.98             | 942.15             |
| A_68_P27542104 | chr10:128007271-128007315                         | NM_010153:19265         | Erb33         | INSIDE                 | 0.783                                                        | 2.066                          | 640.76             | 1323.81            | 1.617                          | 571.31             | 923.99             |
| A_68_P31254846 | chr17:56395500-56395544                           | NM_010192:-693          | Fem1a         | PROMOTER               | 0.783                                                        | 0.539                          | 1959.17            | 1056.46            | 0.422                          | 1599.44            | 675.58             |
| A_68_P32141594 | chr19:46078185-46078229                           | NM_176785:239           | Hps6          | INSIDE                 | 0.783                                                        | 0.534                          | 2211.08            | 1180.66            | 0.418                          | 1894.19            | 791.78             |
| A_68_P28600850 | chr12:86217424-86217472                           | NM_013589:-3            | Ltbp2         | PROMOTER               | 0.783                                                        | 0.626                          | 2039.80            | 1276.61            | 0.490                          | 1500.51            | 734.97             |
| A_68_P22659608 | chr3:153568818-153568862                          | NM_031870:262           | Msh4          | INSIDE                 | 0.783                                                        | 2.121                          | 750.09             | 1591.03            | 1.662                          | 601.54             | 999.65             |
| A_68_P30382865 | chr15:82169342-82169386                           | NM_008669:-108          | Naga          | DIVERGENT_PROMOTER     | 0.783                                                        | 0.666                          | 1125.97            | 749.40             | 0.521                          | 897.36             | 467.44             |
| A_68_P28058390 | chr11:98629362-98629406                           | NM_145434:7172          | Nr1d1         | INSIDE                 | 0.783                                                        | 2.381                          | 783.05             | 1864.75            | 1.865                          | 670.07             | 1249.75            |
| A_68_P32150070 | chr19:47538439-47538483                           | NM_001164717:441        | Sh3pxd2a      | INSIDE                 | 0.783                                                        | 0.638                          | 987.71             | 630.13             | 0.499                          | 787.84             | 393.42             |
| A_68_P23590342 | chr5:34000582-34000626                            | NM_026698:-123          | Tmem129       | DIVERGENT_PROMOTER     | 0.783                                                        | 0.613                          | 1964.20            | 1203.99            | 0.480                          | 1477.52            | 708.81             |
| A_68_P25019106 | chr7:28623585-28623629                            | NM_011762:4             | Zfp59         | INSIDE                 | 0.783                                                        | 0.396                          | 1377.99            | 545.36             | 0.310                          | 1279.23            | 396.64             |
| A_68_P31305848 | chr17:66729002-66729046                           | NM_001114098:70066      | 1110012J17Rik | INSIDE                 | 0.782                                                        | 2.677                          | 1782.37            | 4770.63            | 2.094                          | 1323.99            | 2771.88            |
| A_68_P28724511 | chr12:109153539-109153583                         | NM_001079883:88064      | Bcl11b        | INSIDE                 | 0.782                                                        | 2.289                          | 1559.74            | 3570.42            | 1.789                          | 1379.55            | 2468.13            |

| ProbeName      | Target position of probe on CpG island microarray | TargetID                 | GeneSymbol    | CpG island Description | Ratio of relative methylation (TiO <sub>2</sub> -NP/Vehicle) | Sham group                     |                    |                    | TiO <sub>2</sub> -H group      |                    |                    |
|----------------|---------------------------------------------------|--------------------------|---------------|------------------------|--------------------------------------------------------------|--------------------------------|--------------------|--------------------|--------------------------------|--------------------|--------------------|
|                |                                                   |                          |               |                        |                                                              | Relative methylation (Cy5/Cy3) | Cy3 signal (Input) | Cy5 signal (MeDIP) | Relative methylation (Cy5/Cy3) | Cy3 signal (Input) | Cy5 signal (MeDIP) |
| A_68_P23585862 | chr5:33196731-33196775                            | NM_194340:127            | C330019G07Rik | INSIDE                 | 0.782                                                        | 0.666                          | 1934.47            | 1287.93            | 0.521                          | 1521.05            | 792.17             |
| A_68_P28153128 | chr11:115235533-115235577                         | NM_175454:-6521          | C630004H02Rik | DIVERGENT_PROMOTER     | 0.782                                                        | 0.528                          | 1203.70            | 635.07             | 0.412                          | 935.18             | 385.61             |
| A_68_P30349019 | chr15:76371485-76371529                           | NM_029643:2134           | Gpr172b       | INSIDE                 | 0.782                                                        | 2.493                          | 754.89             | 1882.08            | 1.950                          | 582.33             | 1135.58            |
| A_68_P24946692 | chr7:3616894-3616938                              | NM_027203:526            | Leng1         | INSIDE                 | 0.782                                                        | 0.559                          | 1788.56            | 1000.04            | 0.437                          | 1412.88            | 618.10             |
| A_68_P21794500 | chr2:160193311-160193355                          | NM_010658:-531           | Mafb          | PROMOTER               | 0.782                                                        | 1.907                          | 2362.42            | 4504.88            | 1.491                          | 1754.92            | 2616.16            |
| A_68_P24466341 | chr6:54894000-54894044                            | NM_001171007:27633       | Nod1          | INSIDE                 | 0.782                                                        | 1.904                          | 1744.26            | 3320.52            | 1.488                          | 1572.63            | 2340.39            |
| A_68_P21151182 | chr2:38781242-38781286                            | NM_010264:717            | Nr6a1         | INSIDE                 | 0.782                                                        | 0.726                          | 2374.23            | 1724.83            | 0.568                          | 1754.60            | 997.23             |
| A_68_P30486485 | chr15:100408605-100408649                         | NM_010127:8170           | Pou6f1        | INSIDE                 | 0.782                                                        | 1.994                          | 1593.14            | 3175.96            | 1.559                          | 1200.83            | 1871.96            |
| A_68_P30496913 | chr15:102087851-102087895                         | NM_011244:42             | Rarg          | INSIDE                 | 0.782                                                        | 1.783                          | 3944.03            | 7033.80            | 1.395                          | 2742.69            | 3826.34            |
| A_68_P30964219 | chr16:91660394-91660440                           | NM_019973:12348          | Son           | INSIDE                 | 0.782                                                        | 3.432                          | 1042.31            | 3577.32            | 2.686                          | 853.13             | 2291.10            |
| A_68_P27466133 | chr10:114238616-114238660                         | NM_146241:-212           | Trhde         | PROMOTER               | 0.782                                                        | 0.596                          | 941.03             | 560.93             | 0.466                          | 781.50             | 364.06             |
| A_68_P21291249 | chr2:66094636-66094680                            | NM_001047604:16          | Tie21b        | INSIDE                 | 0.782                                                        | 0.637                          | 1031.76            | 656.96             | 0.498                          | 869.67             | 432.79             |
| A_68_P27287711 | chr10:80610869-80610913                           | NM_010731:11875          | Zbtb7a        | INSIDE                 | 0.782                                                        | 2.419                          | 1566.59            | 3788.83            | 1.892                          | 1281.89            | 2425.37            |
| A_68_P31841472 | chr18:76305759-76305803                           | NM_145356:325949         | Zbtb7c        | INSIDE                 | 0.782                                                        | 2.521                          | 835.85             | 2106.82            | 1.971                          | 699.89             | 1379.69            |
| A_68_P26986177 | chr10:20032526-20032570                           | NM_001025392:274         | Belaf1        | INSIDE                 | 0.781                                                        | 0.409                          | 1805.45            | 737.70             | 0.319                          | 1390.79            | 443.53             |
| A_68_P27261502 | chr10:75808270-75808314                           | NM_001081419:-285        | Dip2a         | PROMOTER               | 0.781                                                        | 0.466                          | 3866.54            | 1800.83            | 0.364                          | 3086.53            | 1122.30            |
| A_68_P20457518 | chr1:95698322-95698366                            | NM_001105667:167         | Dtymk         | INSIDE                 | 0.781                                                        | 0.518                          | 1641.47            | 850.00             | 0.405                          | 1474.50            | 596.67             |
| A_68_P23195766 | chr4:108055710-108055754                          | NM_001099303:222         | Fam159a       | INSIDE                 | 0.781                                                        | 7.982                          | 848.23             | 6770.59            | 6.234                          | 623.66             | 3887.73            |
| A_68_P25095386 | chr7:53088149-53088193                            | NM_008172:33881          | Grin2d        | INSIDE                 | 0.781                                                        | 0.514                          | 1116.60            | 573.74             | 0.401                          | 952.37             | 382.22             |
| A_68_P21840389 | chr2:168088474-168088518                          | NM_001081134:6335        | Keng1         | INSIDE                 | 0.781                                                        | 2.746                          | 938.43             | 2577.35            | 2.145                          | 816.10             | 1750.41            |
| A_68_P28290822 | chr12:25335897-25335941                           | NM_178357:-317           | Klfl1         | PROMOTER               | 0.781                                                        | 0.631                          | 1591.57            | 1004.94            | 0.493                          | 1120.23            | 552.48             |
| A_68_P21127262 | chr2:34226792-34226836                            | NM_016768:742            | Pbx3          | INSIDE                 | 0.781                                                        | 0.485                          | 1418.91            | 688.00             | 0.379                          | 1110.36            | 420.31             |
| A_68_P22101769 | chr3:45184575-45184623                            | NM_011043:2279           | Pcdh10        | INSIDE                 | 0.781                                                        | 0.637                          | 1018.86            | 649.44             | 0.498                          | 771.74             | 384.01             |
| A_68_P26554635 | chr9:59505156-59505202                            | NM_011099:764            | Pkm2          | INSIDE                 | 0.781                                                        | 0.531                          | 1200.23            | 637.60             | 0.415                          | 969.73             | 402.31             |
| A_68_P25065938 | chr7:39006759-39006803                            | NM_024413:6233           | Plekhf1       | INSIDE                 | 0.781                                                        | 1.843                          | 2384.98            | 4394.92            | 1.439                          | 1767.42            | 2543.09            |
| A_68_P24325038 | chr6:29128989-29129033                            | NM_001101443:574         | Prrt4         | INSIDE                 | 0.781                                                        | 1.769                          | 1692.34            | 2993.39            | 1.382                          | 1582.91            | 2187.01            |
| A_68_P26512820 | chr9:51856174-51856218                            | NM_001104617:151         | Rdx           | INSIDE                 | 0.781                                                        | 1.987                          | 828.26             | 1645.64            | 1.553                          | 759.13             | 1178.57            |
| A_68_P22829977 | chr4:34136995-34137039                            | NM_026293:26             | Spaca1        | INSIDE                 | 0.781                                                        | 2.203                          | 633.70             | 1395.97            | 1.720                          | 591.26             | 1016.72            |
| A_68_P23364324 | chr4:141034644-141034688                          | NM_019763:59846          | Spen          | INSIDE                 | 0.781                                                        | 2.419                          | 736.44             | 1781.70            | 1.889                          | 523.94             | 989.64             |
| A_68_P30446395 | chr15:93167839-93167883                           | NM_024189:-494           | Yaf2          | PROMOTER               | 0.781                                                        | 0.681                          | 1281.39            | 872.48             | 0.532                          | 1089.59            | 579.39             |
| A_68_P21824617 | chr2:165389151-165389195                          |                          |               | Unknown                | 0.781                                                        | 4.009                          | 1154.64            | 4629.23            | 3.133                          | 1031.55            | 3232.00            |
| A_68_P32473672 | chrX:73212006-73212050                            | ENSMUST00000121090:-7721 |               | PROMOTER               | 0.781                                                        | 2.416                          | 1892.68            | 4571.93            | 1.886                          | 808.29             | 1524.18            |
| A_68_P29193440 | chr13:85328880-85328924                           | NM_023243:-179           | Cenh          | PROMOTER               | 0.780                                                        | 0.584                          | 1161.85            | 679.06             | 0.456                          | 1044.99            | 476.58             |
| A_68_P27894485 | chr11:69160283-69160327                           | NM_146019:22624          | Chd3          | INSIDE                 | 0.780                                                        | 1.837                          | 1228.24            | 2255.95            | 1.433                          | 948.15             | 1358.91            |
| A_68_P32121142 | chr19:42506084-42506128                           | NM_145123:167            | Crtac1        | INSIDE                 | 0.780                                                        | 0.704                          | 2008.61            | 1414.15            | 0.549                          | 1624.29            | 891.87             |
| A_68_P28067417 | chr11:100180968-100181012                         | NM_011508:-319           | Eif1          | PROMOTER               | 0.780                                                        | 0.656                          | 2339.70            | 1535.09            | 0.512                          | 1762.17            | 901.65             |
| A_68_P28038135 | chr11:95198498-95198542                           | NM_172543:189            | Fam117a       | INSIDE                 | 0.780                                                        | 0.632                          | 870.25             | 550.06             | 0.493                          | 720.26             | 354.93             |
| A_68_P23323336 | chr4:134090794-134090838                          | NM_029759:-2149          | Fam54b        | PROMOTER               | 0.780                                                        | 2.851                          | 305.64             | 871.32             | 2.224                          | 316.25             | 703.32             |
| A_68_P29034753 | chr13:51942852-51942896                           | NM_011817:831            | Gadd45g       | INSIDE                 | 0.780                                                        | 1.842                          | 5899.19            | 10863.54           | 1.436                          | 3976.36            | 5708.13            |
| A_68_P25091031 | chr7:52332036-52332080                            | NM_001163684:14260       | Nosip         | INSIDE                 | 0.780                                                        | 2.328                          | 1045.18            | 2433.59            | 1.817                          | 855.32             | 1554.05            |
| A_68_P26343621 | chr9:20531598-20531642                            | NM_173777:1038           | Olfm2         | INSIDE                 | 0.780                                                        | 0.528                          | 2618.29            | 1381.49            | 0.412                          | 2132.64            | 877.73             |
| A_68_P23072594 | chr4:84851732-84851776                            | NM_019535:395            | Sh3g2         | INSIDE                 | 0.780                                                        | 0.704                          | 1943.66            | 1368.42            | 0.549                          | 1495.45            | 821.72             |
| A_68_P24991409 | chr7:19680854-19680898                            | NM_011383:984            | Six5          | INSIDE                 | 0.780                                                        | 0.563                          | 1147.41            | 645.73             | 0.439                          | 804.67             | 353.31             |
| A_68_P30964221 | chr16:91660638-91660682                           | NM_019973:12592          | Son           | INSIDE                 | 0.780                                                        | 1.920                          | 4922.17            | 9453.00            | 1.499                          | 3814.02            | 5716.52            |
| A_68_P23938669 | chr5:102498892-102498936                          | NM_172882:26             | Wdfy3         | INSIDE                 | 0.780                                                        | 0.714                          | 4522.09            | 3227.59            | 0.556                          | 3414.30            | 1899.95            |
| A_68_P31206429 | chr17:46464876-46464920                           | NM_145140:-2183          | Abec10        | PROMOTER               | 0.779                                                        | 0.569                          | 1201.95            | 683.78             | 0.443                          | 1051.80            | 466.06             |
| A_68_P32097030 | chr19:37765358-37765402                           | NM_001105201:5211        | Cyp26c1       | INSIDE                 | 0.779                                                        | 0.684                          | 993.01             | 679.09             | 0.533                          | 913.93             | 487.10             |
| A_68_P23200236 | chr4:108953010-108953054                          | NM_007943:153            | Eps15         | INSIDE                 | 0.779                                                        | 0.545                          | 1886.16            | 1028.08            | 0.425                          | 1765.29            | 749.74             |
| A_68_P24142209 | chr5:141082297-141082341                          | NM_008494:-976           | Lfng          | PROMOTER               | 0.779                                                        | 0.711                          | 1613.01            | 1146.07            | 0.554                          | 1196.20            | 662.37             |
| A_68_P30363604 | chr15:78813243-78813287                           | NM_001024716:-221        | Triobp        | PROMOTER               | 0.779                                                        | 0.569                          | 2914.40            | 1656.97            | 0.443                          | 2324.51            | 1029.02            |
| A_68_P26158626 | chr8:112248068-112248112                          | NM_029468:18103          | Zfp821        | INSIDE                 | 0.779                                                        | 3.186                          | 613.30             | 1954.22            | 2.482                          | 519.80             | 1290.40            |

| ProbeName      | Target position of probe on CpG island microarray | TargetID                  | GeneSymbol    | CpG island Description | Ratio of relative methylation (TiO <sub>2</sub> -NP/Vehicle) | Sham group                     |                    |                    | TiO <sub>2</sub> -H group      |                    |                    |
|----------------|---------------------------------------------------|---------------------------|---------------|------------------------|--------------------------------------------------------------|--------------------------------|--------------------|--------------------|--------------------------------|--------------------|--------------------|
|                |                                                   |                           |               |                        |                                                              | Relative methylation (Cy5/Cy3) | Cy3 signal (Input) | Cy5 signal (MeDIP) | Relative methylation (Cy5/Cy3) | Cy3 signal (Input) | Cy5 signal (MeDIP) |
| A_68_P25503174 | chr7:134093374-134093418                          | NM_001039645-301          | Asphd1        | DIVERGENT_PROMOTER     | 0.778                                                        | 0.631                          | 918.96             | 580.05             | 0.491                          | 760.01             | 373.37             |
| A_68_P25588373 | chr7:148547408-148547453                          | NR_033532:3579            | B230206H07Rik | INSIDE                 | 0.778                                                        | 3.297                          | 7334.63            | 24181.37           | 2.565                          | 5321.88            | 13652.11           |
| A_68_P24055344 | chr5:123821115-123821164                          | NM_029850:26683           | Bcl7a         | INSIDE                 | 0.778                                                        | 2.589                          | 737.73             | 1910.30            | 2.014                          | 583.53             | 1175.27            |
| A_68_P24141810 | chr5:141000020-141000064                          | NM_021528:18480           | Chst12        | INSIDE                 | 0.778                                                        | 2.668                          | 1186.21            | 3165.11            | 2.077                          | 829.81             | 1723.60            |
| A_68_P24780082 | chr6:117118689-117118733                          | NM_021704:158             | Cxcl12        | INSIDE                 | 0.778                                                        | 2.510                          | 2476.86            | 6217.17            | 1.953                          | 2128.04            | 4157.09            |
| A_68_P24138666 | chr5:140449442-140449486                          | NM_175522:65568           | Elfn1         | INSIDE                 | 0.778                                                        | 2.680                          | 2740.33            | 7343.56            | 2.085                          | 2005.87            | 4182.15            |
| A_68_P20826006 | chr1:172995780-172995824                          | NM_010188:-6268           | Fcgr3         | PROMOTER               | 0.778                                                        | 0.498                          | 12537.63           | 6247.46            | 0.387                          | 11319.62           | 4386.23            |
| A_68_P21839458 | chr2:167924133-167924177                          | NM_021409:17651           | Pard6b        | INSIDE                 | 0.778                                                        | 2.322                          | 1320.69            | 3066.84            | 1.807                          | 1066.94            | 1928.10            |
| A_68_P28322711 | chr12:30623110-30623154                           | NM_181395:232             | Pxdn          | INSIDE                 | 0.778                                                        | 0.655                          | 1363.19            | 892.93             | 0.509                          | 971.61             | 495.01             |
| A_68_P30473042 | chr15:97923469-97923513                           | NM_144851:346             | Senp1         | INSIDE                 | 0.778                                                        | 0.544                          | 1256.94            | 683.70             | 0.423                          | 1090.05            | 461.25             |
| A_68_P27925674 | chr11:75161948-75161992                           | NM_001102611:36           | Smyd4         | INSIDE                 | 0.778                                                        | 0.572                          | 1535.09            | 877.86             | 0.445                          | 1536.92            | 684.07             |
| A_68_P21912035 | chr2:181415320-181415364                          | NM_009326:328             | Teaa2         | INSIDE                 | 0.778                                                        | 0.496                          | 1561.28            | 774.43             | 0.386                          | 1298.25            | 501.03             |
| A_68_P26593994 | chr9:66440646-66440690                            | NM_144937:119             | Usp3          | INSIDE                 | 0.778                                                        | 0.698                          | 2173.75            | 1518.14            | 0.543                          | 1871.76            | 1017.02            |
| A_68_P27835783 | chr11:59063276-59063320                           | NM_009522:40955           | Wnt3a         | INSIDE                 | 0.778                                                        | 1.932                          | 1275.63            | 2464.85            | 1.504                          | 1031.52            | 1551.44            |
| A_68_P21823503 | chr2:165205763-165205807                          | NM_178411:7975            | Zfp334        | INSIDE                 | 0.778                                                        | 2.035                          | 1403.61            | 2856.41            | 1.583                          | 1165.51            | 1845.06            |
| A_68_P30503431 | chr15:103144557-103144601                         | NM_013866:25939           | Zfp385a       | INSIDE                 | 0.778                                                        | 3.860                          | 3916.57            | 15118.68           | 3.003                          | 2644.28            | 7940.23            |
| A_68_P24761385 | chr6:113709127-113709171                          | NM_001036684:132222       | Atp2b2        | INSIDE                 | 0.777                                                        | 2.268                          | 1125.08            | 2551.91            | 1.763                          | 843.89             | 1487.64            |
| A_68_P24592899 | chr6:83299323-83299367                            | NM_175277:-133            | Bola3         | PROMOTER               | 0.777                                                        | 0.621                          | 3564.21            | 2212.91            | 0.483                          | 2767.34            | 1335.64            |
| A_68_P21746890 | chr2:151796229-151796275                          | NM_028666:3458            | Fam110a       | INSIDE                 | 0.777                                                        | 3.289                          | 1145.03            | 3765.55            | 2.554                          | 890.25             | 2273.85            |
| A_68_P30501064 | chr15:102797841-102797885                         | NM_010462:636             | Hoxc10        | INSIDE                 | 0.777                                                        | 0.609                          | 874.41             | 532.78             | 0.474                          | 685.89             | 324.84             |
| A_68_P27995155 | chr11:87431487-87431532                           | NM_001045527:844          | Hsf5          | INSIDE                 | 0.777                                                        | 2.936                          | 509.38             | 1495.57            | 2.282                          | 447.63             | 1021.28            |
| A_68_P20058161 | chr1:17087384-17087428                            | NM_020604:564             | Jph1          | INSIDE                 | 0.777                                                        | 0.707                          | 3488.58            | 2467.38            | 0.550                          | 2849.06            | 1565.92            |
| A_68_P27279589 | chr10:79361980-79362024                           | NM_001163276:9681         | Med16         | INSIDE                 | 0.777                                                        | 2.355                          | 1612.47            | 3798.15            | 1.831                          | 1125.48            | 2060.28            |
| A_68_P21630442 | chr2:130389408-130389452                          | NM_207207:-62             | Mrps26        | PROMOTER               | 0.777                                                        | 0.387                          | 1693.66            | 654.78             | 0.300                          | 1394.13            | 418.69             |
| A_68_P21777850 | chr2:157385964-157386008                          | NM_010923:141             | Nnat          | INSIDE                 | 0.777                                                        | 1.835                          | 1359.03            | 2493.85            | 1.426                          | 1122.42            | 1600.09            |
| A_68_P28602643 | chr12:86518346-86518390                           | NM_008827:-133            | Pgf           | PROMOTER               | 0.777                                                        | 0.665                          | 1308.87            | 870.25             | 0.516                          | 1039.14            | 536.54             |
| A_68_P30423563 | chr15:88991030-88991074                           | NM_001159521:13228        | Plxbn2        | INSIDE                 | 0.777                                                        | 2.890                          | 1668.28            | 4820.98            | 2.245                          | 1161.47            | 2607.35            |
| A_68_P32552601 | chrX:96133272-96133316                            | NM_207633:175             | Yipf6         | INSIDE                 | 0.777                                                        | 2.641                          | 952.87             | 2516.81            | 2.052                          | 695.58             | 1427.36            |
| A_68_P31147863 | chr17:33103125-33103169                           | NM_153063:371             | Zfp472        | INSIDE                 | 0.777                                                        | 0.625                          | 1452.03            | 906.83             | 0.485                          | 1159.33            | 562.81             |
| A_68_P25581871 | chr7:147222691-147222735                          | NM_027201:423             | Zfp511        | INSIDE                 | 0.777                                                        | 0.482                          | 1602.93            | 772.10             | 0.374                          | 1236.24            | 462.95             |
| A_68_P31120935 | chr17:28314314-28314358                           | NM_172617:-26             | Zfp523        | PROMOTER               | 0.777                                                        | 0.442                          | 1182.87            | 522.27             | 0.343                          | 933.57             | 320.37             |
| A_68_P24979387 | chr7:16647658-16647714                            | NM_001099277:-9604        | Zfp541        | PROMOTER               | 0.777                                                        | 2.337                          | 493.57             | 1153.48            | 1.815                          | 428.33             | 777.42             |
| A_68_P20049940 | chr1:15276455-15276499                            |                           |               | Unknown                | 0.777                                                        | 0.523                          | 1157.85            | 605.96             | 0.407                          | 900.62             | 366.40             |
| A_68_P24686647 | chr6:99471695-99471739                            | ENSMUST00000155466:145075 |               | INSIDE                 | 0.777                                                        | 0.626                          | 2444.00            | 1529.68            | 0.486                          | 1928.83            | 937.96             |
| A_68_P28593717 | chr12:84962112-84962165                           | ENSMUST00000166167:979    |               | DOWNSTREAM             | 0.777                                                        | 2.565                          | 509.59             | 1307.33            | 1.994                          | 430.76             | 858.97             |
| A_68_P27835482 | chr11:59022044-59022088                           | NM_024210:204             | 2310033P09Rik | INSIDE                 | 0.776                                                        | 0.700                          | 1867.78            | 1307.43            | 0.543                          | 1297.05            | 704.67             |
| A_68_P21823609 | chr2:165221660-165221704                          | NM_029021:4212            | 4833422F24Rik | INSIDE                 | 0.776                                                        | 3.252                          | 549.32             | 1786.63            | 2.524                          | 463.42             | 1169.71            |
| A_68_P30579428 | chr16:18393075-18393119                           | NM_033474:44730           | Arvcf         | INSIDE                 | 0.776                                                        | 0.468                          | 1668.29            | 780.70             | 0.363                          | 1204.09            | 437.39             |
| A_68_P26893781 | chr9:123125176-123125220                          | NM_133974:-42             | Cdcp1         | PROMOTER               | 0.776                                                        | 0.636                          | 1437.40            | 914.66             | 0.494                          | 1297.98            | 640.99             |
| A_68_P24226573 | chr6:8459493-8459537                              | NM_133236:-81             | Glied1        | PROMOTER               | 0.776                                                        | 1.901                          | 889.13             | 1689.90            | 1.474                          | 753.60             | 1111.03            |
| A_68_P27278521 | chr10:79187599-79187649                           | NM_008226:8246            | Hen2          | INSIDE                 | 0.776                                                        | 4.094                          | 1348.72            | 5522.02            | 3.177                          | 964.08             | 3062.63            |
| A_68_P22403734 | chr3:106839172-106839216                          | NM_008418:115             | Kena3         | INSIDE                 | 0.776                                                        | 0.690                          | 6383.92            | 4403.92            | 0.536                          | 4855.12            | 2599.99            |
| A_68_P24332082 | chr6:30409887-30409931                            | NM_029742:58000           | Klhdc10       | DOWNSTREAM             | 0.776                                                        | 0.594                          | 948.30             | 563.42             | 0.461                          | 877.16             | 404.30             |
| A_68_P26824823 | chr9:110532457-110532506                          | NM_183276:24184           | Nbeal2        | INSIDE                 | 0.776                                                        | 2.630                          | 838.91             | 2206.37            | 2.042                          | 600.73             | 1226.46            |
| A_68_P27178540 | chr10:60552155-60552199                           | NM_025273:86              | Pebd1         | INSIDE                 | 0.776                                                        | 0.620                          | 1152.13            | 714.89             | 0.482                          | 910.57             | 438.54             |
| A_68_P22246603 | chr3:75360626-75360670                            | NM_019745:73              | Pdcd10        | INSIDE                 | 0.776                                                        | 0.445                          | 2028.13            | 902.53             | 0.345                          | 1698.10            | 586.28             |
| A_68_P26293556 | chr9:8901995-8902039                              | NM_008829:2184            | Pgr           | INSIDE                 | 0.776                                                        | 0.661                          | 1160.63            | 766.92             | 0.513                          | 971.24             | 498.11             |
| A_68_P29336876 | chr13:113590895-113590939                         | NM_008247:-83             | Ppap2a        | PROMOTER               | 0.776                                                        | 0.571                          | 1362.37            | 777.70             | 0.443                          | 1075.18            | 476.16             |
| A_68_P29527054 | chr14:34768675-34768719                           | NM_015745:1489            | Rbp3          | INSIDE                 | 0.776                                                        | 2.712                          | 979.13             | 2655.67            | 2.105                          | 773.06             | 1627.67            |
| A_68_P28314235 | chr12:29320659-29320703                           | NM_011300:138             | Rps7          | INSIDE                 | 0.776                                                        | 0.593                          | 991.30             | 587.82             | 0.460                          | 871.72             | 401.35             |
| A_68_P21604776 | chr2:125608207-125608251                          | NM_177608:378             | Secisbp2l     | INSIDE                 | 0.776                                                        | 0.533                          | 2043.88            | 1090.11            | 0.414                          | 1676.32            | 694.18             |

| ProbeName      | Target position of probe on CpG island microarray | TargetID              | GeneSymbol    | CpG island Description | Ratio of relative methylation (TiO <sub>2</sub> -NP/Vehicle) | Sham group                     |                    |                    | TiO <sub>2</sub> -H group      |                    |                    |
|----------------|---------------------------------------------------|-----------------------|---------------|------------------------|--------------------------------------------------------------|--------------------------------|--------------------|--------------------|--------------------------------|--------------------|--------------------|
|                |                                                   |                       |               |                        |                                                              | Relative methylation (Cy5/Cy3) | Cy3 signal (Input) | Cy5 signal (MeDIP) | Relative methylation (Cy5/Cy3) | Cy3 signal (Input) | Cy5 signal (MeDIP) |
| A_68_P20183364 | chr1:42548598-42548642                            |                       |               | Unknown                | 0.776                                                        | 0.521                          | 1325.55            | 691.12             | 0.405                          | 1035.42            | 419.13             |
| A_68_P22345155 | chr3:95491890-95491934                            | NM_144899:-131        | Adams14       | PROMOTER               | 0.775                                                        | 0.353                          | 1756.99            | 619.55             | 0.273                          | 1438.39            | 393.11             |
| A_68_P24098219 | chr5:131916213-131916257                          | NM_177047:1101979     | Aut2s         | INSIDE                 | 0.775                                                        | 2.145                          | 709.65             | 1521.95            | 1.662                          | 537.73             | 893.56             |
| A_68_P20969129 | chr2:4524543-4524587                              | NM_001177844:43765    | Frmd4a        | INSIDE                 | 0.775                                                        | 2.134                          | 2111.23            | 4505.34            | 1.655                          | 1714.55            | 2837.26            |
| A_68_P26525029 | chr9:54134177-54134221                            | NM_177350:-94         | Gldn          | PROMOTER               | 0.775                                                        | 0.632                          | 1463.07            | 924.00             | 0.490                          | 1216.94            | 595.71             |
| A_68_P23232472 | chr4:116781942-116781986                          | NM_008958:13004       | Ptch2         | INSIDE                 | 0.775                                                        | 2.038                          | 1530.24            | 3118.02            | 1.578                          | 1105.21            | 1744.46            |
| A_68_P30452812 | chr15:94353918-94353962                           | NM_172437:19998       | Pus7l         | INSIDE                 | 0.775                                                        | 1.859                          | 1106.16            | 2056.70            | 1.441                          | 1040.12            | 1499.26            |
| A_68_P29696766 | chr14:70107048-70107092                           | NM_001146012:317      | R3hcc1        | INSIDE                 | 0.775                                                        | 0.546                          | 1414.98            | 772.18             | 0.423                          | 1132.39            | 478.80             |
| A_68_P27687431 | chr11:32113256-32113300                           | NM_010117:9015        | Rhbdf1        | INSIDE                 | 0.775                                                        | 2.035                          | 1584.90            | 3225.38            | 1.577                          | 1110.81            | 1751.67            |
| A_68_P30486392 | chr15:100382126-100382170                         | NM_033476:230         | Tefcp2        | INSIDE                 | 0.775                                                        | 2.558                          | 527.61             | 1349.81            | 1.983                          | 498.01             | 987.74             |
| A_68_P20228142 | chr1:52687609-52687653                            | NM_001142647:82       | Tmem194b      | INSIDE                 | 0.775                                                        | 1.937                          | 1478.25            | 2864.03            | 1.501                          | 1256.95            | 1886.79            |
| A_68_P21047274 | chr2:19831411-19831455                            | ENSMUST00000114610:26 |               | INSIDE                 | 0.775                                                        | 3.881                          | 776.08             | 3011.69            | 3.009                          | 736.92             | 2217.17            |
| A_68_P21483984 | chr2:103406229-103406273                          | NM_178890:-216        | Abtb2         | PROMOTER               | 0.774                                                        | 2.335                          | 3815.88            | 8909.27            | 1.807                          | 2729.21            | 4932.48            |
| A_68_P32717147 | chrX:140752774-140752818                          | NM_026247:288         | Alg13         | INSIDE                 | 0.774                                                        | 2.344                          | 2565.95            | 6015.59            | 1.815                          | 1194.47            | 2167.85            |
| A_68_P27981858 | chr11:85048078-85048122                           | NM_025825:522         | Appbp2        | INSIDE                 | 0.774                                                        | 0.709                          | 1823.86            | 1293.84            | 0.549                          | 1634.10            | 897.50             |
| A_68_P20827005 | chr1:173200387-173200431                          | NM_020579:-50         | B4galt3       | PROMOTER               | 0.774                                                        | 0.683                          | 2297.04            | 1569.37            | 0.529                          | 1977.43            | 1045.68            |
| A_68_P26040515 | chr8:90886224-90886268                            | NM_012047:-156        | Brd7          | PROMOTER               | 0.774                                                        | 0.616                          | 954.52             | 588.29             | 0.477                          | 863.55             | 412.14             |
| A_68_P21821920 | chr2:164967484-164967528                          | NM_174988:92731       | Cdh22         | INSIDE                 | 0.774                                                        | 2.159                          | 1888.25            | 4077.01            | 1.670                          | 1566.23            | 2616.21            |
| A_68_P30588850 | chr16:20672735-20672779                           | NM_001005331:-65      | Eif4g1        | PROMOTER               | 0.774                                                        | 0.614                          | 3143.73            | 1929.12            | 0.475                          | 2315.81            | 1099.28            |
| A_68_P28159316 | chr11:116295859-116295905                         | NR_003376:356         | Gm7367        | INSIDE                 | 0.774                                                        | 2.170                          | 679.96             | 1475.62            | 1.679                          | 488.43             | 820.01             |
| A_68_P20058118 | chr1:17081821-17081865                            | NM_020604:6128        | Jph1          | INSIDE                 | 0.774                                                        | 2.694                          | 984.90             | 2653.32            | 2.084                          | 936.74             | 1952.03            |
| A_68_P27288385 | chr10:80720479-80720523                           | NM_010768:211         | Matk          | INSIDE                 | 0.774                                                        | 1.935                          | 1296.17            | 2508.55            | 1.498                          | 1108.52            | 1660.34            |
| A_68_P21421546 | chr2:91096010-91096054                            | NM_030880:-937        | Pacsin3       | PROMOTER               | 0.774                                                        | 0.579                          | 1001.85            | 579.90             | 0.448                          | 830.74             | 372.13             |
| A_68_P25737020 | chr8:28284902-28284946                            | NM_001080813:194      | Rab11fip1     | INSIDE                 | 0.774                                                        | 0.488                          | 1860.42            | 907.96             | 0.378                          | 1573.62            | 594.48             |
| A_68_P27550649 | chr11:3093369-3093413                             | NM_030207:76          | Sfi1          | INSIDE                 | 0.774                                                        | 2.220                          | 10782.01           | 23938.27           | 1.718                          | 9874.11            | 16966.01           |
| A_68_P26238683 | chr8:125760064-125760108                          | NM_030176:23          | Spata2L       | INSIDE                 | 0.774                                                        | 0.672                          | 966.76             | 650.05             | 0.520                          | 817.06             | 425.07             |
| A_68_P31093748 | chr17:23944200-23944249                           | NM_175229:4071        | Srrm2         | INSIDE                 | 0.774                                                        | 2.790                          | 1281.96            | 3577.15            | 2.159                          | 962.97             | 2078.86            |
| A_68_P24160100 | chr5:144984626-144984670                          | NM_027410:-201        | Tecpr1        | PROMOTER               | 0.774                                                        | 0.662                          | 1099.98            | 728.14             | 0.512                          | 893.09             | 457.50             |
| A_68_P31953349 | chr19:10944024-10944068                           | NM_133804:223         | Tmem132a      | INSIDE                 | 0.774                                                        | 0.690                          | 1155.52            | 797.37             | 0.534                          | 899.40             | 480.08             |
| A_68_P28261145 | chr12:15823651-15823695                           | NM_144551:-81         | Trib2         | PROMOTER               | 0.774                                                        | 0.391                          | 1834.82            | 717.18             | 0.303                          | 1360.12            | 411.64             |
| A_68_P26650022 | chr9:76415008-76415052                            | AK049628:-108         |               | PROMOTER               | 0.774                                                        | 0.461                          | 1791.24            | 826.16             | 0.357                          | 1519.29            | 542.48             |
| A_68_P28143200 | chr11:113510983-113511027                         | NM_013581:162         | Cog1          | INSIDE                 | 0.773                                                        | 0.618                          | 1413.70            | 873.68             | 0.478                          | 1112.47            | 531.53             |
| A_68_P20885894 | chr1:184212723-184212767                          | NM_007853:146         | Degs1         | INSIDE                 | 0.773                                                        | 0.425                          | 1432.03            | 608.02             | 0.328                          | 1205.36            | 395.42             |
| A_68_P32030717 | chr19:25684634-25684678                           | NM_177360:-370        | Dmrt3         | PROMOTER               | 0.773                                                        | 0.692                          | 3422.82            | 2368.75            | 0.535                          | 2759.62            | 1476.10            |
| A_68_P20960553 | chr2:3036013-3036057                              | NM_001081161:375      | Fam171a1      | INSIDE                 | 0.773                                                        | 2.379                          | 478.45             | 1138.37            | 1.840                          | 500.51             | 920.95             |
| A_68_P22291220 | chr3:84284795-84284843                            | NM_001033301:-457     | Fhdc1         | PROMOTER               | 0.773                                                        | 0.655                          | 4622.63            | 3027.50            | 0.506                          | 3305.09            | 1672.38            |
| A_68_P23440270 | chr4:155108999-155109043                          | NM_001101506:108      | Gm5151        | INSIDE                 | 0.773                                                        | 0.732                          | 6159.66            | 4506.77            | 0.566                          | 5267.62            | 2979.89            |
| A_68_P28069615 | chr11:100569978-100570022                         | NM_001038010:3781     | Kat2a         | INSIDE                 | 0.773                                                        | 2.398                          | 700.21             | 1679.16            | 1.853                          | 573.39             | 1062.57            |
| A_68_P28004886 | chr11:89160716-89160763                           | NM_008711:3134        | Nog           | DOWNSTREAM             | 0.773                                                        | 0.601                          | 1425.98            | 856.34             | 0.464                          | 1040.92            | 483.25             |
| A_68_P23543335 | chr5:24191462-24191506                            | NM_016736:-148        | Nub1          | PROMOTER               | 0.773                                                        | 1.811                          | 16627.77           | 30117.09           | 1.400                          | 11157.24           | 15615.51           |
| A_68_P31626612 | chr18:37159632-37159676                           | NM_009961:-5319       | Pcdha10       | PROMOTER               | 0.773                                                        | 2.024                          | 655.47             | 1326.61            | 1.565                          | 582.46             | 911.37             |
| A_68_P31097498 | chr17:24607655-24607699                           | NM_025954:259         | Pgp           | INSIDE                 | 0.773                                                        | 0.645                          | 2839.44            | 1831.97            | 0.499                          | 2135.98            | 1065.33            |
| A_68_P25361263 | chr7:106497545-106497589                          | NM_001111043:4183     | Serpinh1      | INSIDE                 | 0.773                                                        | 2.119                          | 637.11             | 1350.03            | 1.637                          | 517.37             | 847.13             |
| A_68_P21265073 | chr2:61431374-61431418                            | NM_001164071:243      | Tank          | INSIDE                 | 0.773                                                        | 0.530                          | 1112.51            | 589.97             | 0.410                          | 934.52             | 383.28             |
| A_68_P27288945 | chr10:80795851-80795895                           | NM_009325:4397        | Tbxa2r        | INSIDE                 | 0.773                                                        | 1.962                          | 1294.98            | 2541.30            | 1.517                          | 899.70             | 1365.25            |
| A_68_P31372684 | chr17:79024264-79024308                           | NM_001197028:116884   | Vit           | INSIDE                 | 0.773                                                        | 2.399                          | 840.61             | 2016.36            | 1.853                          | 680.50             | 1261.23            |
| A_68_P21823445 | chr2:165194080-165194124                          | NM_001005425:-6483    | Zfp663        | PROMOTER               | 0.773                                                        | 0.640                          | 1233.60            | 789.76             | 0.495                          | 1279.03            | 632.92             |
| A_68_P32975885 | A_68_P32975885                                    |                       | Unknown       | INSIDE                 | 0.773                                                        | 2.417                          | 907.64             | 2193.77            | 1.869                          | 892.15             | 1667.12            |
| A_68_P21485723 | chr2:103659521-103659569                          | ENSMUST00000167989:89 |               | INSIDE                 | 0.773                                                        | 3.473                          | 271.76             | 943.80             | 2.685                          | 270.47             | 726.28             |
| A_68_P25417173 | chr7:118266112-118266156                          | NR_015573:55          | 1700012D14Rik | INSIDE                 | 0.772                                                        | 0.401                          | 1841.94            | 738.96             | 0.310                          | 1651.38            | 511.63             |
| A_68_P20416260 | chr1:89083300-89083344                            | NM_027084:3255        | 1700027L20Rik | INSIDE                 | 0.772                                                        | 0.575                          | 1199.85            | 689.35             | 0.443                          | 920.52             | 408.12             |

| ProbeName      | Target position of probe on CpG island microarray | TargetID           | GeneSymbol    | CpG island Description | Ratio of relative methylation (TiO <sub>2</sub> -NP/Vehicle) | Sham group                     |                    |                    | TiO <sub>2</sub> -H group      |                    |                    |
|----------------|---------------------------------------------------|--------------------|---------------|------------------------|--------------------------------------------------------------|--------------------------------|--------------------|--------------------|--------------------------------|--------------------|--------------------|
|                |                                                   |                    |               |                        |                                                              | Relative methylation (Cy5/Cy3) | Cy3 signal (Input) | Cy5 signal (MeDIP) | Relative methylation (Cy5/Cy3) | Cy3 signal (Input) | Cy5 signal (MeDIP) |
| A_68_P26570105 | chr9:62211596-62211640                            | NM_009672:22469    | Anp32a        | INSIDE                 | 0.772                                                        | 2.230                          | 2353.23            | 5247.76            | 1.721                          | 1958.11            | 3370.80            |
| A_68_P25828114 | chr8:46129885-46129933                            | NM_001081286:94347 | Fat1          | INSIDE                 | 0.772                                                        | 2.476                          | 621.67             | 1539.38            | 1.913                          | 467.87             | 894.95             |
| A_68_P27815757 | chr11:55283721-55283765                           | NM_013716:489      | G3bp1         | INSIDE                 | 0.772                                                        | 0.525                          | 1999.91            | 1049.37            | 0.405                          | 1678.10            | 680.19             |
| A_68_P26528147 | chr9:54711749-54711793                            | NM_022655:209      | Ireb2         | INSIDE                 | 0.772                                                        | 0.632                          | 1304.60            | 825.06             | 0.488                          | 1243.94            | 607.03             |
| A_68_P21005388 | chr2:11211825-11211873                            | NM_008859:117840   | Prkeq         | INSIDE                 | 0.772                                                        | 2.341                          | 327.68             | 766.96             | 1.806                          | 339.73             | 613.62             |
| A_68_P24994420 | chr7:20214602-20214646                            | NM_009046:163      | Relb          | INSIDE                 | 0.772                                                        | 2.587                          | 944.34             | 2442.58            | 1.996                          | 765.50             | 1527.99            |
| A_68_P26809840 | chr9:107501144-107501188                          | NM_009153:6567     | Sema3b        | INSIDE                 | 0.772                                                        | 2.108                          | 775.25             | 1633.87            | 1.626                          | 662.38             | 1077.18            |
| A_68_P24389050 | chr6:40421239-40421283                            | NM_028358:-153     | Ssbp1         | PROMOTER               | 0.772                                                        | 0.553                          | 1940.06            | 1073.00            | 0.427                          | 1562.07            | 667.29             |
| A_68_P28635991 | chr12:92886270-92886322                           | NM_175367:138580   | Ston2         | INSIDE                 | 0.772                                                        | 2.309                          | 1073.99            | 2479.91            | 1.784                          | 805.18             | 1436.17            |
| A_68_P21081133 | chr2:26771936-26771980                            | NM_013678:18       | Surf2         | INSIDE                 | 0.772                                                        | 0.615                          | 990.00             | 608.80             | 0.475                          | 722.16             | 342.79             |
| A_68_P22059399 | chr3:36570106-36570152                            | NM_019510:18961    | Trpc3         | INSIDE                 | 0.772                                                        | 2.259                          | 512.11             | 1156.89            | 1.745                          | 416.46             | 726.51             |
| A_68_P31479226 | chr18:7869155-7869199                             | NM_001146298:-18   | Wac           | PROMOTER               | 0.772                                                        | 0.658                          | 4327.51            | 2848.19            | 0.508                          | 3410.77            | 1732.16            |
| A_68_P26290459 | chr9:8004389-8004433                              | NM_001171147:186   | Yap1          | INSIDE                 | 0.772                                                        | 0.437                          | 2781.46            | 1216.72            | 0.338                          | 2340.05            | 790.53             |
| A_68_P25614628 | A_68_P25614628                                    |                    |               | Unknown                | 0.772                                                        | 0.712                          | 2137.43            | 1521.80            | 0.550                          | 1716.36            | 943.59             |
| A_68_P31215872 | chr17:48232748-48232792                           | NM_026625:6189     | 1700067P10Rik | DOWNSTREAM             | 0.771                                                        | 0.693                          | 1383.81            | 959.19             | 0.535                          | 1204.51            | 644.02             |
| A_68_P26742257 | chr9:95412328-95412372                            | NM_001114977:65    | 2610101N10Rik |                        | 0.771                                                        | 0.679                          | 1255.94            | 852.85             | 0.523                          | 997.16             | 521.90             |
| A_68_P29622468 | chr14:56983893-56983937                           | NM_138652:10       | Atp12a        | INSIDE                 | 0.771                                                        | 0.716                          | 1359.98            | 973.58             | 0.552                          | 1063.97            | 586.94             |
| A_68_P27649722 | chr11:24064060-24064104                           | NM_001159290:83388 | Bcl11a        | INSIDE                 | 0.771                                                        | 5.780                          | 171.08             | 988.79             | 4.458                          | 189.93             | 846.63             |
| A_68_P26822033 | chr9:110019921-110019966                          | NM_133347:-1857    | Dhx30         | PROMOTER               | 0.771                                                        | 0.349                          | 2441.22            | 852.03             | 0.269                          | 2058.80            | 553.77             |
| A_68_P26137131 | chr8:108503327-108503371                          | NM_027960:-29      | Dpep3         | PROMOTER               | 0.771                                                        | 2.001                          | 1106.15            | 2213.68            | 1.542                          | 818.90             | 1263.10            |
| A_68_P21621792 | chr2:128689765-128689810                          | NM_024237:120      | Fbln7         | INSIDE                 | 0.771                                                        | 0.606                          | 2112.05            | 1280.47            | 0.467                          | 1702.98            | 795.53             |
| A_68_P26244127 | chr8:126755799-126755843                          | NM_139272:527      | Galnt2        | INSIDE                 | 0.771                                                        | 0.577                          | 1435.22            | 828.57             | 0.445                          | 1152.19            | 512.98             |
| A_68_P27286893 | chr10:80477575-80477619                           | NM_010319:74       | Gng7          | INSIDE                 | 0.771                                                        | 0.554                          | 2094.59            | 1159.80            | 0.427                          | 1585.66            | 676.78             |
| A_68_P30339719 | chr15:74630243-74630287                           | NM_029627:134      | Ly6k          | INSIDE                 | 0.771                                                        | 2.036                          | 836.02             | 1702.06            | 1.569                          | 709.31             | 1112.74            |
| A_68_P26132669 | chr8:107800240-107800284                          | NM_030152:-84      | Nol3          | PROMOTER               | 0.771                                                        | 0.722                          | 9262.70            | 6688.81            | 0.557                          | 6935.79            | 3860.77            |
| A_68_P30961703 | chr16:91227699-91227743                           | NM_016967:1926     | Olig2         | INSIDE                 | 0.771                                                        | 0.659                          | 2946.46            | 1941.98            | 0.508                          | 2430.37            | 1234.62            |
| A_68_P27447375 | chr10:110602439-110602483                         | NM_001003717:603   | Osbpl8        | INSIDE                 | 0.771                                                        | 0.618                          | 1319.94            | 815.71             | 0.476                          | 1118.32            | 532.64             |
| A_68_P31784090 | chr18:66094724-66094768                           | NM_013833:3997     | Rax           | INSIDE                 | 0.771                                                        | 0.666                          | 946.65             | 630.04             | 0.513                          | 761.69             | 390.92             |
| A_68_P30970963 | chr16:92699012-92699056                           | NM_001111023:-1461 | Runx1         | PROMOTER               | 0.771                                                        | 0.690                          | 1215.85            | 839.36             | 0.532                          | 1061.96            | 565.16             |
| A_68_P21747684 | chr2:151931743-151931787                          | NM_029688:299      | Srxn1         | INSIDE                 | 0.771                                                        | 0.630                          | 1137.14            | 716.83             | 0.486                          | 889.12             | 432.39             |
| A_68_P27288893 | chr10:80788499-80788543                           | NM_027381:4673     | 2510012I08Rik | INSIDE                 | 0.770                                                        | 2.472                          | 2173.21            | 5372.07            | 1.903                          | 1703.88            | 3242.56            |
| A_68_P24183687 | chr5:149995851-149995895                          | NR_015478:-233     | 5730422E09Rik | DIVERGENT_PROMOTER     | 0.770                                                        | 0.561                          | 2749.52            | 1542.27            | 0.432                          | 2193.22            | 946.99             |
| A_68_P23392318 | chr4:147462079-147462123                          | NM_009642:73       | Agtrap        | INSIDE                 | 0.770                                                        | 0.527                          | 1888.24            | 995.65             | 0.406                          | 1412.79            | 573.28             |
| A_68_P23315556 | chr4:132617579-132617623                          | NM_146155:50180    | Ahdcl         | INSIDE                 | 0.770                                                        | 1.869                          | 3316.30            | 6197.67            | 1.438                          | 2456.72            | 3533.18            |
| A_68_P28724528 | chr12:109155568-109155612                         | NM_001079883:86034 | Bcl11b        | INSIDE                 | 0.770                                                        | 2.346                          | 1360.95            | 3192.76            | 1.806                          | 1024.30            | 1849.70            |
| A_68_P25090363 | chr7:52225872-52225916                            | NM_153679:4250     | Cpt1c         | INSIDE                 | 0.770                                                        | 0.452                          | 1237.98            | 559.66             | 0.348                          | 908.26             | 316.11             |
| A_68_P21566328 | chr2:118639932-118639976                          | NM_026412:216      | D2ErtD750e    | INSIDE                 | 0.770                                                        | 2.983                          | 2047.40            | 6107.29            | 2.298                          | 1444.98            | 3320.23            |
| A_68_P23335296 | chr4:136249920-136249964                          | NM_010142:141908   | Ephb2         | INSIDE                 | 0.770                                                        | 2.293                          | 934.48             | 2142.35            | 1.765                          | 694.62             | 1226.03            |
| A_68_P30555521 | chr16:13110069-13110113                           | NM_015769:262      | Ercc4         | INSIDE                 | 0.770                                                        | 0.648                          | 979.07             | 634.92             | 0.499                          | 894.86             | 446.83             |
| A_68_P20644880 | chr1:138157179-138157223                          | NM_001101516:250   | Gpr25         | INSIDE                 | 0.770                                                        | 2.434                          | 353.49             | 860.44             | 0.457                          | 401.57             | 752.86             |
| A_68_P28069614 | chr11:100569881-100569928                         | NM_001038010:3877  | Kat2a         | INSIDE                 | 0.770                                                        | 3.024                          | 1053.28            | 3185.52            | 2.329                          | 843.67             | 1965.28            |
| A_68_P31614609 | chr18:34936465-34936509                           | NM_001081256:-175  | Kdm3b         | PROMOTER               | 0.770                                                        | 0.608                          | 1077.18            | 654.42             | 0.468                          | 954.43             | 446.76             |
| A_68_P21077002 | chr2:26057533-26057577                            | NM_001039653:4522  | Lhx3          | INSIDE                 | 0.770                                                        | 0.469                          | 1373.34            | 644.02             | 0.361                          | 1059.91            | 382.71             |
| A_68_P32559513 | chrX:97624742-97624791                            | NM_001163191:415   | Otud6a        | INSIDE                 | 0.770                                                        | 2.174                          | 2184.05            | 4749.01            | 1.674                          | 869.01             | 1454.69            |
| A_68_P22518662 | chr3:128907576-128907620                          | NM_001042502:-9256 | Pitx2         | PROMOTER               | 0.770                                                        | 0.660                          | 1920.85            | 1268.31            | 0.508                          | 1180.50            | 599.85             |
| A_68_P26460307 | chr9:43013586-43013630                            | NM_011139:230      | Pou2f3        | INSIDE                 | 0.770                                                        | 1.883                          | 5303.84            | 9986.21            | 1.450                          | 4048.38            | 5869.73            |
| A_68_P23577159 | chr5:31522755-31522799                            | NM_008014:142      | Ppm1g         | INSIDE                 | 0.770                                                        | 0.682                          | 1373.02            | 936.28             | 0.525                          | 1192.18            | 626.06             |
| A_68_P25089821 | chr7:52124278-52124322                            | NM_133949:858      | Ptov1         | INSIDE                 | 0.770                                                        | 0.365                          | 2074.63            | 757.77             | 0.281                          | 1519.32            | 427.16             |
| A_68_P26567742 | chr9:61762149-61762193                            | NM_018853:147      | Rplp1         | INSIDE                 | 0.770                                                        | 0.398                          | 1364.55            | 543.23             | 0.307                          | 1115.65            | 342.08             |
| A_68_P32796351 | chrX:160514199-160514243                          | NM_009173:-239     | Siah1b        | PROMOTER               | 0.770                                                        | 2.222                          | 949.12             | 2109.03            | 1.711                          | 543.82             | 930.55             |
| A_68_P21483992 | chr2:103407094-103407138                          | NM_178890:650      | Abtb2         | INSIDE                 | 0.769                                                        | 0.563                          | 1542.60            | 868.45             | 0.433                          | 1403.51            | 607.37             |

| ProbeName      | Target position of probe on CpG island microarray | TargetID               | GeneSymbol    | CpG island Description | Ratio of relative methylation (TiO <sub>2</sub> -NP/Vehicle) | Sham group                     |                    |                    | TiO <sub>2</sub> -H group      |                    |                    |
|----------------|---------------------------------------------------|------------------------|---------------|------------------------|--------------------------------------------------------------|--------------------------------|--------------------|--------------------|--------------------------------|--------------------|--------------------|
|                |                                                   |                        |               |                        |                                                              | Relative methylation (Cy5/Cy3) | Cy3 signal (Input) | Cy5 signal (MeDIP) | Relative methylation (Cy5/Cy3) | Cy3 signal (Input) | Cy5 signal (MeDIP) |
| A_68_P24983044 | chr7:17323761-17323805                            | NM_198613:-10          | Ap2s1         | PROMOTER               | 0.769                                                        | 0.644                          | 1033.25            | 665.85             | 0.496                          | 881.90             | 437.17             |
| A_68_P23609441 | chr5:37139453-37139497                            | NM_133724:444          | Cno           | INSIDE                 | 0.769                                                        | 0.395                          | 1479.41            | 583.77             | 0.304                          | 1150.30            | 349.14             |
| A_68_P26693200 | chr9:85221504-85221548                            | NM_001160379:-769      | Fam46a        | PROMOTER               | 0.769                                                        | 2.914                          | 8360.81            | 24361.72           | 2.241                          | 7304.92            | 16373.35           |
| A_68_P28493840 | chr12:66176906-66176950                           | NM_178912:336          | Fancm         | INSIDE                 | 0.769                                                        | 0.664                          | 2725.87            | 1808.67            | 0.510                          | 2130.09            | 1086.30            |
| A_68_P21874396 | chr2:174110775-174110819                          | NM_019690:976          | Gnas          | INSIDE                 | 0.769                                                        | 2.354                          | 678.20             | 1596.61            | 1.810                          | 589.03             | 1066.23            |
| A_68_P26258435 | chr8:129118517-129118561                          | NM_001164598:-1202     | Irf2bp2       | PROMOTER               | 0.769                                                        | 0.617                          | 926.03             | 571.27             | 0.474                          | 791.98             | 375.75             |
| A_68_P30370807 | chr15:80041905-80041949                           | NM_010795:37776        | Mgat3         | INSIDE                 | 0.769                                                        | 2.870                          | 1061.77            | 3046.93            | 2.207                          | 887.51             | 1959.11            |
| A_68_P25952998 | chr8:73135664-73135708                            | NM_133772:-3473        | Ssbp4         | DIVERGENT_PROMOTER     | 0.769                                                        | 0.677                          | 3248.76            | 2199.83            | 0.521                          | 2484.21            | 1293.48            |
| A_68_P23801063 | chr5:74464594-74464638                            | NM_177561:-180         | Usp46         | PROMOTER               | 0.769                                                        | 0.508                          | 2113.07            | 1073.24            | 0.390                          | 1796.84            | 701.53             |
| A_68_P22346431 | chr3:95734111-95734155                            | NM_023210:953          | Anp32c        | INSIDE                 | 0.768                                                        | 2.087                          | 512.85             | 1070.34            | 1.603                          | 518.42             | 831.09             |
| A_68_P23225794 | chr4:115457937-115457981                          | NM_181040:369          | Atpafl        | INSIDE                 | 0.768                                                        | 0.648                          | 2391.22            | 1550.41            | 0.498                          | 2164.24            | 1077.12            |
| A_68_P27364531 | chr10:94786138-94786182                           | NM_009950:571          | Cradd         | INSIDE                 | 0.768                                                        | 0.425                          | 1921.34            | 817.30             | 0.327                          | 1562.66            | 510.28             |
| A_68_P21752117 | chr2:152777180-152777224                          | NM_145744:-61          | Dusp15        | PROMOTER               | 0.768                                                        | 0.617                          | 882.69             | 544.59             | 0.474                          | 786.72             | 372.94             |
| A_68_P24138654 | chr5:140448211-140448259                          | NM_175522:64338        | Elfn1         | INSIDE                 | 0.768                                                        | 3.080                          | 1711.95            | 5272.60            | 2.365                          | 1176.69            | 2782.46            |
| A_68_P24602879 | chr6:85019299-85019343                            | NM_177077:187          | Exoc6c        | INSIDE                 | 0.768                                                        | 0.271                          | 2582.46            | 700.88             | 0.208                          | 2186.10            | 455.63             |
| A_68_P24131505 | chr5:139231244-139231288                          | NM_030565:232          | Fam20c        | INSIDE                 | 0.768                                                        | 0.638                          | 2771.19            | 1767.10            | 0.490                          | 2143.05            | 1049.51            |
| A_68_P27924560 | chr11:74979095-74979139                           | NM_001098203:2538      | Hic1          | INSIDE                 | 0.768                                                        | 2.478                          | 330.28             | 818.30             | 1.903                          | 320.22             | 609.53             |
| A_68_P25652440 | chr8:11007123-11007167                            | NM_001081212:1286      | Irs2          | INSIDE                 | 0.768                                                        | 0.705                          | 1468.72            | 1034.89            | 0.541                          | 1260.35            | 682.35             |
| A_68_P31542492 | chr18:21160633-21160677                           | NM_019706:813          | Rnf138        | INSIDE                 | 0.768                                                        | 0.631                          | 1700.39            | 1073.00            | 0.484                          | 1390.12            | 673.43             |
| A_68_P21571541 | chr2:119613237-119613281                          | NM_001163701:15        | Rpap1         | INSIDE                 | 0.768                                                        | 0.676                          | 1296.47            | 875.94             | 0.519                          | 1233.67            | 640.21             |
| A_68_P31560666 | chr18:24688433-24688477                           | NM_144861:251          | Rprd1a        | INSIDE                 | 0.768                                                        | 0.651                          | 2299.37            | 1497.49            | 0.500                          | 1946.09            | 973.11             |
| A_68_P25269238 | chr7:88046152-88046196                            | NM_028026:-19          | Wdr73         | PROMOTER               | 0.768                                                        | 2.616                          | 577.31             | 1510.45            | 2.009                          | 562.66             | 1130.53            |
| A_68_P23364088 | chr4:141001073-141001117                          | NM_009541:507          | Zbtb17        | INSIDE                 | 0.768                                                        | 0.677                          | 4324.19            | 2928.76            | 0.520                          | 3152.01            | 1640.33            |
| A_68_P25008264 | chr7:25866238-25866282                            | NM_175477:3996         | Zfp574        | INSIDE                 | 0.768                                                        | 1.983                          | 1945.85            | 3859.23            | 1.524                          | 1353.49            | 2062.64            |
| A_68_P24319368 | chr6:28211888-28211932                            | NM_001081678:-309      | Zfp800        | PROMOTER               | 0.768                                                        | 0.519                          | 1383.68            | 718.79             | 0.399                          | 1144.22            | 456.51             |
| A_68_P28737720 | chr12:111558182-111558226                         | AK200124:417643        |               | INSIDE                 | 0.768                                                        | 2.424                          | 951.56             | 2306.20            | 1.862                          | 719.80             | 1340.14            |
| A_68_P26372146 | chr9:26541704-26541748                            | ENSMUST00000067362:291 |               | INSIDE                 | 0.768                                                        | 0.598                          | 3139.58            | 1877.13            | 0.459                          | 2422.97            | 1112.40            |
| A_68_P21586516 | chr2:122293842-122293886                          | NR_027919:-331         | Bambi-ps1     | PROMOTER               | 0.767                                                        | 0.627                          | 1333.20            | 835.76             | 0.481                          | 1135.11            | 545.52             |
| A_68_P26169911 | chr8:114255931-114255975                          | NM_001198839:84        | Bear1         | INSIDE                 | 0.767                                                        | 0.667                          | 3069.19            | 2046.85            | 0.511                          | 2633.68            | 1346.90            |
| A_68_P31329273 | chr17:70865582-70865626                           | NM_001128180:-5845     | Dlgap1        | PROMOTER               | 0.767                                                        | 1.945                          | 1430.47            | 2782.88            | 1.492                          | 1195.82            | 1783.95            |
| A_68_P25005397 | chr7:25318691-25318735                            | NM_153134:3046         | Irgq          | INSIDE                 | 0.767                                                        | 2.133                          | 1211.77            | 2585.08            | 1.636                          | 1056.05            | 1727.97            |
| A_68_P31150843 | chr17:34027445-34027489                           | NM_001195298:112       | Kifc1         | INSIDE                 | 0.767                                                        | 2.028                          | 3364.24            | 6822.25            | 1.555                          | 2681.67            | 4169.08            |
| A_68_P24993843 | chr7:20118011-20118055                            | NM_199149:29715        | Lrrc68        | INSIDE                 | 0.767                                                        | 3.796                          | 1228.05            | 4662.05            | 2.911                          | 895.78             | 2607.70            |
| A_68_P31097947 | chr17:24670396-24670440                           | NM_177375:274          | Rab26         | INSIDE                 | 0.767                                                        | 0.502                          | 1256.80            | 630.31             | 0.385                          | 971.17             | 373.76             |
| A_68_P23538328 | chr5:23293397-23293441                            | NM_177323:-143         | Rint1         | DIVERGENT_PROMOTER     | 0.767                                                        | 0.503                          | 1294.18            | 651.22             | 0.386                          | 994.11             | 383.43             |
| A_68_P31253059 | chr17:56110248-56110292                           | NM_001159523:366       | Shd           | INSIDE                 | 0.767                                                        | 2.140                          | 4792.95            | 10254.57           | 1.641                          | 3232.11            | 5303.67            |
| A_68_P30979272 | chr16:94079709-94079753                           | NM_011377:-5774        | Sim2          | PROMOTER               | 0.767                                                        | 0.615                          | 903.11             | 555.02             | 0.471                          | 762.45             | 359.44             |
| A_68_P32081999 | chr19:34821540-34821584                           | NM_172838:39           | Slc16a12      | INSIDE                 | 0.767                                                        | 0.616                          | 1035.43            | 637.47             | 0.472                          | 848.91             | 400.65             |
| A_68_P24382791 | chr6:39327608-39327652                            | NM_028123:76           | Slc37a3       | INSIDE                 | 0.767                                                        | 0.519                          | 6979.47            | 3624.66            | 0.398                          | 5674.71            | 2261.20            |
| A_68_P25025682 | chr7:29946707-29946751                            | NM_182927:6938         | Spred3        | INSIDE                 | 0.767                                                        | 1.983                          | 1774.60            | 3519.28            | 1.521                          | 1525.13            | 2319.32            |
| A_68_P24118746 | chr5:136438629-136438673                          | NM_001160366:11696     | Srerb4d       | INSIDE                 | 0.767                                                        | 0.688                          | 2526.33            | 1737.74            | 0.528                          | 1940.74            | 1024.27            |
| A_68_P30344887 | chr15:75740593-75740637                           | NM_178646:450          | Tigd5         | INSIDE                 | 0.767                                                        | 0.542                          | 2743.28            | 1486.21            | 0.416                          | 2190.79            | 910.63             |
| A_68_P23321804 | chr4:133805561-133805605                          | NM_024215:-4076        | Zfp593        | PROMOTER               | 0.767                                                        | 2.804                          | 2813.16            | 7889.49            | 2.150                          | 2007.59            | 4317.04            |
| A_68_P30474024 | chr15:98126375-98126419                           | NM_173769:118          | Zfp641        | INSIDE                 | 0.767                                                        | 0.723                          | 4153.37            | 3004.28            | 0.555                          | 3182.34            | 1765.33            |
| A_68_P20252948 | chr1:57463462-57463506                            | NM_001037742:34        | 1110034B05Rik | INSIDE                 | 0.766                                                        | 0.624                          | 930.72             | 580.56             | 0.478                          | 803.96             | 384.12             |
| A_68_P25933299 | chr8:69010150-69010194                            | NM_025465:234          | 1810029B16Rik | INSIDE                 | 0.766                                                        | 0.547                          | 2901.53            | 1587.36            | 0.419                          | 2516.68            | 1054.93            |
| A_68_P23441288 | chr4:155266214-155266258                          | NM_207223:253          | Acap3         | INSIDE                 | 0.766                                                        | 0.533                          | 1720.39            | 916.58             | 0.408                          | 1420.28            | 579.80             |
| A_68_P27383820 | chr10:98377065-98377109                           | NM_026482:-699         | Atp2b1        | PROMOTER               | 0.766                                                        | 0.426                          | 6502.00            | 2769.40            | 0.326                          | 5300.06            | 1728.55            |
| A_68_P26845894 | chr9:114598017-114598061                          | NM_146229:90           | Dync1li1      | INSIDE                 | 0.766                                                        | 0.551                          | 1037.15            | 571.07             | 0.422                          | 853.13             | 359.98             |
| A_68_P31106389 | chr17:25946375-25946419                           | NM_001164225:367       | Fbx116        | INSIDE                 | 0.766                                                        | 0.557                          | 2696.33            | 1502.72            | 0.427                          | 2122.95            | 906.28             |
| A_68_P29936842 | chr14:118536259-118536304                         | NM_021434:-67          | Gpr180        | DIVERGENT_PROMOTER     | 0.766                                                        | 0.680                          | 2275.92            | 1548.55            | 0.521                          | 1888.15            | 984.02             |

| ProbeName      | Target position of probe on CpG island microarray | TargetID               | GeneSymbol    | CpG island Description | Ratio of relative methylation (TiO <sub>2</sub> -NP/Vehicle) | Sham group                     |                    |                    | TiO <sub>2</sub> -H group      |                    |                    |
|----------------|---------------------------------------------------|------------------------|---------------|------------------------|--------------------------------------------------------------|--------------------------------|--------------------|--------------------|--------------------------------|--------------------|--------------------|
|                |                                                   |                        |               |                        |                                                              | Relative methylation (Cy5/Cy3) | Cy3 signal (Input) | Cy5 signal (MeDIP) | Relative methylation (Cy5/Cy3) | Cy3 signal (Input) | Cy5 signal (MeDIP) |
| A_68_P23297928 | chr4:129349890-129349934                          | NM_008468:99           | Kpna6         | INSIDE                 | 0.766                                                        | 0.681                          | 2570.42            | 1751.59            | 0.522                          | 2251.63            | 1176.00            |
| A_68_P25101644 | chr7:54100954-54100988                            | NM_010699:-197         | Ldha          | PROMOTER               | 0.766                                                        | 0.472                          | 1332.26            | 629.45             | 0.362                          | 1119.19            | 405.16             |
| A_68_P25370887 | chr7:108147267-108147311                          | NM_008773:13217        | P2ry2         | INSIDE                 | 0.766                                                        | 3.358                          | 2343.59            | 7869.08            | 2.573                          | 1716.51            | 4416.98            |
| A_68_P30650847 | chr16:32079473-32079517                           | NM_177326:-135         | Pak2          | PROMOTER               | 0.766                                                        | 0.477                          | 1850.96            | 882.74             | 0.365                          | 1478.55            | 539.81             |
| A_68_P24019803 | chr5:117737771-117737817                          | NM_018858:-221         | Pebp1         | PROMOTER               | 0.766                                                        | 0.575                          | 1503.95            | 865.38             | 0.441                          | 1224.01            | 539.38             |
| A_68_P21820156 | chr2:164682452-164682496                          | NM_011125:734          | Plip          | INSIDE                 | 0.766                                                        | 0.700                          | 1415.20            | 991.33             | 0.536                          | 1268.86            | 680.47             |
| A_68_P28159867 | chr11:116395295-116395339                         | NM_011451:-737         | Sphk1         | PROMOTER               | 0.766                                                        | 0.657                          | 1987.19            | 1305.45            | 0.503                          | 1514.77            | 762.29             |
| A_68_P31104080 | chr17:25611583-25611627                           | NM_027951:3070         | Tekt4         | INSIDE                 | 0.766                                                        | 0.542                          | 1277.44            | 692.21             | 0.415                          | 994.75             | 412.73             |
| A_68_P20937461 | chr1:193149904-193149948                          | NM_025864:83           | Tmem206       | INSIDE                 | 0.766                                                        | 0.535                          | 1125.56            | 601.64             | 0.410                          | 813.09             | 333.09             |
| A_68_P22492341 | chr3:124024087-124024131                          | NM_146140:154          | Tram111       | INSIDE                 | 0.766                                                        | 0.620                          | 1694.40            | 1051.20            | 0.475                          | 1428.82            | 679.33             |
| A_68_P29733552 | chr14:76816020-76816064                           | NM_207652:415          | Tsc22d1       | INSIDE                 | 0.766                                                        | 0.706                          | 1932.11            | 1364.63            | 0.541                          | 1362.98            | 737.09             |
| A_68_P26814404 | chr9:108249925-108249969                          | NM_011678:-215         | Usp4          | PROMOTER               | 0.766                                                        | 0.541                          | 1001.14            | 541.59             | 0.414                          | 806.21             | 333.92             |
| A_68_P23315908 | chr4:132686610-132686654                          | NM_153423:85           | Wasf2         | INSIDE                 | 0.766                                                        | 0.626                          | 920.67             | 575.94             | 0.479                          | 737.06             | 353.08             |
| A_68_P31939561 | chr19:7457740-7457784                             | NM_001033139:-246      | AI846148      | PROMOTER               | 0.765                                                        | 0.685                          | 1251.28            | 856.70             | 0.524                          | 1009.24            | 528.34             |
| A_68_P21099934 | chr2:29724540-29724584                            | NM_207298:-451         | Cercam        | PROMOTER               | 0.765                                                        | 0.524                          | 1004.51            | 526.06             | 0.400                          | 925.08             | 370.45             |
| A_68_P31928605 | chr19:5424975-5425019                             | NM_024176:-80          | Drap1         | DIVERGENT_PROMOTER     | 0.765                                                        | 0.656                          | 4645.32            | 3046.63            | 0.502                          | 3353.67            | 1682.55            |
| A_68_P21708095 | chr2:144425963-144426007                          | NM_025314:296          | Dtd1          | INSIDE                 | 0.765                                                        | 2.011                          | 1212.96            | 2439.50            | 1.538                          | 1057.67            | 1627.17            |
| A_68_P30181641 | chr15:44451230-44451274                           | NM_019480:66           | Ebag9         | INSIDE                 | 0.765                                                        | 0.405                          | 1411.51            | 572.15             | 0.310                          | 1185.78            | 367.54             |
| A_68_P26224700 | chr8:123652354-123652398                          | NM_008024:792          | Fox11         | INSIDE                 | 0.765                                                        | 0.704                          | 5086.60            | 3581.77            | 0.539                          | 3994.16            | 2152.08            |
| A_68_P23355530 | chr4:139590457-139590501                          | NM_198610:212248       | Igslf21       | INSIDE                 | 0.765                                                        | 2.302                          | 2079.85            | 4786.88            | 1.761                          | 1429.59            | 2518.09            |
| A_68_P29701860 | chr14:70930843-70930887                           | NM_145219:237          | Lgi3          | INSIDE                 | 0.765                                                        | 0.703                          | 2673.73            | 1879.37            | 0.538                          | 2162.86            | 1163.34            |
| A_68_P21840230 | chr2:168056944-168056988                          | NM_001160330:845       | Mocs3         | INSIDE                 | 0.765                                                        | 2.649                          | 349.56             | 926.11             | 2.027                          | 351.71             | 712.94             |
| A_68_P24444199 | chr6:51383406-51383450                            | NM_010903:760          | Nfe2l3        | INSIDE                 | 0.765                                                        | 0.687                          | 1242.62            | 853.45             | 0.525                          | 1004.84            | 528.00             |
| A_68_P27710218 | chr11:35860780-35860826                           | NM_011856:896943       | Odz2          | INSIDE                 | 0.765                                                        | 3.841                          | 2336.65            | 8974.07            | 2.940                          | 1591.99            | 4680.31            |
| A_68_P24933418 | chr6:147212829-147212873                          | NM_008970:-243         | Pthlh         | PROMOTER               | 0.765                                                        | 0.626                          | 1132.86            | 709.52             | 0.479                          | 946.50             | 453.66             |
| A_68_P23072596 | chr4:84851915-84851959                            | NM_019535:577          | Sh3gl2        | INSIDE                 | 0.765                                                        | 0.462                          | 1398.26            | 645.76             | 0.353                          | 1179.41            | 416.76             |
| A_68_P32775568 | chrX:156065624-156065668                          | NM_001135727:307       | Sh3kbp1       | INSIDE                 | 0.765                                                        | 2.224                          | 1301.14            | 2893.48            | 1.700                          | 716.85             | 1218.88            |
| A_68_P27798798 | chr11:52174210-52174254                           | NM_011694:-384         | Vdac1         | PROMOTER               | 0.765                                                        | 0.595                          | 1287.93            | 766.54             | 0.455                          | 1011.04            | 460.24             |
| A_68_P21570236 | chr2:119373458-119373502                          | NM_019769:38           | 1500003O03Rik | INSIDE                 | 0.764                                                        | 0.722                          | 1519.00            | 1096.16            | 0.551                          | 1228.78            | 677.12             |
| A_68_P25089688 | chr7:52108003-52108047                            | NM_026270:3428         | Akt1s1        | INSIDE                 | 0.764                                                        | 2.277                          | 3686.71            | 8392.84            | 1.739                          | 2459.79            | 4277.36            |
| A_68_P28741420 | chr12:112215750-112215794                         | NM_175207:1459         | Ankrd9        | INSIDE                 | 0.764                                                        | 2.803                          | 1253.44            | 3513.93            | 2.141                          | 914.41             | 1957.34            |
| A_68_P30588543 | chr16:20622319-20622363                           | NM_028420:-989         | Camk2n2       | DIVERGENT_PROMOTER     | 0.764                                                        | 0.548                          | 976.33             | 535.01             | 0.419                          | 787.99             | 329.80             |
| A_68_P28160635 | chr11:116515087-116515131                         | NM_030206:519          | Cygb          | INSIDE                 | 0.764                                                        | 0.609                          | 5401.70            | 3291.76            | 0.466                          | 4420.00            | 2058.74            |
| A_68_P20910366 | chr1:188792121-188792165                          | NM_033077:848          | D1Pas1        | INSIDE                 | 0.764                                                        | 2.574                          | 1599.88            | 4118.67            | 1.966                          | 1274.12            | 2505.30            |
| A_68_P29134802 | chr13:72765932-72765976                           | NR_030701:58           | D430050G20    | INSIDE                 | 0.764                                                        | 0.739                          | 2690.45            | 1988.52            | 0.565                          | 2203.54            | 1244.29            |
| A_68_P23270863 | chr4:124562706-124562750                          | NM_177671:3700         | Epha10        | INSIDE                 | 0.764                                                        | 2.537                          | 365.01             | 926.04             | 1.939                          | 353.49             | 685.35             |
| A_68_P21423681 | chr2:91470003-91470047                            | NM_010168:6547         | F2            | INSIDE                 | 0.764                                                        | 2.440                          | 608.47             | 1484.93            | 1.864                          | 571.41             | 1065.30            |
| A_68_P27093480 | chr10:41916896-41916940                           | NM_019740:79630        | Foxo3         | INSIDE                 | 0.764                                                        | 3.580                          | 862.48             | 3087.46            | 2.734                          | 780.90             | 2134.82            |
| A_68_P21579980 | chr2:121115168-121115212                          | NM_032393:-147         | Mtap1a        | PROMOTER               | 0.764                                                        | 0.576                          | 1461.29            | 841.75             | 0.440                          | 1152.96            | 507.33             |
| A_68_P29508107 | chr14:31639042-31639086                           | NM_028839:285          | Tmem110       | INSIDE                 | 0.764                                                        | 0.412                          | 1366.65            | 563.22             | 0.315                          | 1115.45            | 351.07             |
| A_68_P30752013 | chr16:50529490-50529534                           | ENSMUST00000150937:898 |               | INSIDE                 | 0.764                                                        | 0.572                          | 982.09             | 562.18             | 0.437                          | 919.28             | 401.79             |
| A_68_P25326412 | chr7:99889756-99889800                            | NR_015510:191          | 4632427E13Rik | INSIDE                 | 0.763                                                        | 0.431                          | 1559.67            | 671.99             | 0.329                          | 1252.89            | 412.05             |
| A_68_P31065261 | chr7:15512852-15512896                            | NM_007865:-87          | Dhl1          | PROMOTER               | 0.763                                                        | 0.674                          | 1315.71            | 886.30             | 0.514                          | 1070.25            | 549.94             |
| A_68_P25589002 | chr7:148650716-148650760                          | NM_001025103:3746      | Efcab4a       | INSIDE                 | 0.763                                                        | 0.608                          | 1624.47            | 988.02             | 0.464                          | 1329.00            | 616.44             |
| A_68_P28470863 | chr12:60320797-60320841                           | NM_001033156:-348      | Fbxo33        | PROMOTER               | 0.763                                                        | 0.497                          | 1678.33            | 834.83             | 0.379                          | 1514.29            | 574.62             |
| A_68_P30021002 | chr15:12251634-12251678                           | NM_025673:406          | Golph3        | INSIDE                 | 0.763                                                        | 0.535                          | 1375.95            | 736.03             | 0.408                          | 1211.56            | 494.41             |
| A_68_P25008201 | chr7:25857783-25857827                            | NM_008168:-416         | Grik5         | DIVERGENT_PROMOTER     | 0.763                                                        | 2.094                          | 4509.78            | 9442.99            | 1.597                          | 3633.91            | 5804.25            |
| A_68_P21833672 | chr2:166930250-166930294                          | NM_008420:84027        | Kenb1         | INSIDE                 | 0.763                                                        | 2.219                          | 1628.42            | 3613.84            | 1.694                          | 1250.17            | 2117.88            |
| A_68_P30359899 | chr15:78259252-78259296                           | NM_001081367:217       | Ketd17        | INSIDE                 | 0.763                                                        | 0.600                          | 949.92             | 569.58             | 0.457                          | 800.16             | 365.83             |
| A_68_P22373053 | chr3:100881249-100881294                          | NM_011197:32818        | Ptgfrn        | INSIDE                 | 0.763                                                        | 2.893                          | 550.00             | 1591.21            | 2.207                          | 527.56             | 1164.53            |
| A_68_P31932820 | chr19:6117874-6117918                             | NM_133678:690          | Sac3d1        | INSIDE                 | 0.763                                                        | 0.665                          | 2805.28            | 1865.06            | 0.508                          | 2301.12            | 1167.91            |

| ProbeName      | Target position of probe on CpG island microarray | TargetID            | GeneSymbol    | CpG island Description | Ratio of relative methylation (TiO <sub>2</sub> -NP/Vehicle) | Sham group                     |                    |                    | TiO <sub>2</sub> -H group      |                    |                    |
|----------------|---------------------------------------------------|---------------------|---------------|------------------------|--------------------------------------------------------------|--------------------------------|--------------------|--------------------|--------------------------------|--------------------|--------------------|
|                |                                                   |                     |               |                        |                                                              | Relative methylation (Cy5/Cy3) | Cy3 signal (Input) | Cy5 signal (MeDIP) | Relative methylation (Cy5/Cy3) | Cy3 signal (Input) | Cy5 signal (MeDIP) |
| A_68_P29064232 | chr13:56989171-56989218                           | NM_012035:7755      | Trpc7         | INSIDE                 | 0.763                                                        | 3.081                          | 1555.88            | 4793.48            | 2.351                          | 1063.15            | 2499.68            |
| A_68_P30401623 | chr15:85411668-85411712                           | NM_001163633:-531   | Wnt7b         | PROMOTER               | 0.763                                                        | 0.593                          | 1445.48            | 857.11             | 0.453                          | 1153.69            | 522.08             |
| A_68_P33007659 | A_68_P33007659                                    |                     |               | Unknown                | 0.763                                                        | 2.815                          | 620.93             | 1747.64            | 2.146                          | 790.16             | 1696.07            |
| A_68_P21570454 | chr2:119420252-119420296                          | NR_015473:243       | 1700020114Rik | INSIDE                 | 0.762                                                        | 0.647                          | 1949.28            | 1260.75            | 0.493                          | 1604.19            | 790.35             |
| A_68_P27418180 | chr10:105278284-105278328                         | NM_207522:130       | BC067068      | INSIDE                 | 0.762                                                        | 0.630                          | 1019.55            | 642.11             | 0.480                          | 896.88             | 430.14             |
| A_68_P21905662 | chr2:180436767-180436811                          | NM_175551:17        | Dido1         | INSIDE                 | 0.762                                                        | 0.502                          | 2224.30            | 1117.71            | 0.383                          | 1748.83            | 669.52             |
| A_68_P25564247 | chr7:144390078-144390122                          | NM_001113414:116028 | Ebf3          | INSIDE                 | 0.762                                                        | 1.959                          | 1326.67            | 2599.11            | 1.492                          | 929.22             | 1386.69            |
| A_68_P32559512 | chrX:97624640-97624684                            | NM_001163191:311    | Otud6a        | INSIDE                 | 0.762                                                        | 2.983                          | 2745.97            | 8192.31            | 2.275                          | 1206.88            | 2745.35            |
| A_68_P30346631 | chr15:76013891-76013935                           | NM_201394:12228     | Plec          | INSIDE                 | 0.762                                                        | 2.227                          | 1356.03            | 3020.39            | 1.696                          | 973.86             | 1651.83            |
| A_68_P25092683 | chr7:52622134-52622178                            | NM_029741:233       | Ppfa3         | INSIDE                 | 0.762                                                        | 0.527                          | 1604.44            | 844.96             | 0.402                          | 1302.75            | 523.11             |
| A_68_P30784944 | chr16:57231378-57231422                           | NM_026254:179       | Tbc1d23       | INSIDE                 | 0.762                                                        | 0.593                          | 1285.10            | 761.67             | 0.451                          | 1116.27            | 503.99             |
| A_68_P29141048 | chr13:73764517-73764561                           | NM_009354:90        | Tert          | INSIDE                 | 0.762                                                        | 1.976                          | 1416.85            | 2799.94            | 1.506                          | 1132.52            | 1705.53            |
| A_68_P26153174 | chr8:111324296-111324340                          | NM_007496:85775     | Zfhx3         | INSIDE                 | 0.762                                                        | 2.224                          | 1277.97            | 2841.65            | 1.695                          | 1120.40            | 1899.19            |
| A_68_P24596104 | chr6:83864539-83864583                            | NM_001166371:214    | Zfml          | INSIDE                 | 0.762                                                        | 0.661                          | 1927.71            | 1274.75            | 0.504                          | 1771.44            | 892.51             |
| A_68_P30778639 | chr16:55974658-55974702                           | NR_027965:50        | 2310061J03Rik | INSIDE                 | 0.761                                                        | 0.565                          | 1035.08            | 584.69             | 0.430                          | 926.21             | 398.07             |
| A_68_P21425383 | chr2:91764069-91764117                            | NM_007699:1747      | Chrm4         | INSIDE                 | 0.761                                                        | 0.424                          | 1259.33            | 533.58             | 0.322                          | 967.01             | 311.65             |
| A_68_P26240290 | chr8:126039221-126039265                          | NM_001170976:113    | Dbnnd1        | INSIDE                 | 0.761                                                        | 0.307                          | 1854.06            | 569.93             | 0.234                          | 1644.65            | 384.81             |
| A_68_P22629195 | chr3:148480715-148480769                          | NM_001081298:136857 | Lphn2         | INSIDE                 | 0.761                                                        | 2.286                          | 556.61             | 1272.58            | 1.739                          | 453.96             | 789.55             |
| A_68_P27143269 | chr10:53349507-53349551                           | NM_027830:717       | Mem9          | INSIDE                 | 0.761                                                        | 0.424                          | 1247.69            | 529.54             | 0.323                          | 1148.74            | 371.04             |
| A_68_P25090597 | chr7:52262575-52262619                            | NM_001008422:9023   | Scaf1         | INSIDE                 | 0.761                                                        | 1.887                          | 1426.94            | 2692.57            | 1.436                          | 1086.58            | 1560.29            |
| A_68_P21820817 | chr2:164796549-164796593                          | NM_020333:3083      | Stc12a5       | INSIDE                 | 0.761                                                        | 0.639                          | 1607.03            | 1027.43            | 0.487                          | 1250.90            | 608.67             |
| A_68_P21774859 | chr2:156866427-156866471                          | NM_001164663:38553  | 9830001H06Rik | INSIDE                 | 0.760                                                        | 2.153                          | 2109.78            | 4542.63            | 1.636                          | 1679.61            | 2748.12            |
| A_68_P30927368 | chr16:85080443-85080487                           | NM_001198823:93488  | App           | INSIDE                 | 0.760                                                        | 4.274                          | 8974.78            | 38354.18           | 3.248                          | 6222.87            | 20211.52           |
| A_68_P31936767 | chr19:7008564-7008608                             | NM_008431:419       | Kenk4         | INSIDE                 | 0.760                                                        | 0.464                          | 1384.89            | 641.91             | 0.352                          | 1110.58            | 391.47             |
| A_68_P31472610 | chr18:6240800-6240844                             | NM_008448:700       | Kif5b         | INSIDE                 | 0.760                                                        | 0.507                          | 1732.27            | 878.34             | 0.385                          | 1390.87            | 535.99             |
| A_68_P21906907 | chr2:180628640-180628684                          | NR_029538:-82       | Mir124a-3     | PROMOTER               | 0.760                                                        | 0.589                          | 2740.62            | 1613.61            | 0.447                          | 2579.08            | 1153.62            |
| A_68_P25261461 | chr7:86649744-86649788                            | NR_029818:-383      | Mir9-3        | PROMOTER               | 0.760                                                        | 0.675                          | 2707.75            | 1828.91            | 0.513                          | 2006.82            | 1029.79            |
| A_68_P21368925 | chr2:79297045-79297089                            | NM_010894:-273      | Neurod1       | PROMOTER               | 0.760                                                        | 0.581                          | 1692.17            | 982.36             | 0.441                          | 1204.27            | 531.04             |
| A_68_P31412095 | chr17:86084743-86084787                           | NM_011380:2830      | Six2          | INSIDE                 | 0.760                                                        | 0.543                          | 1389.85            | 755.32             | 0.413                          | 1115.68            | 460.60             |
| A_68_P25508611 | chr7:135153487-135153531                          | NM_001079932:5617   | Trim72        | INSIDE                 | 0.760                                                        | 3.323                          | 1416.09            | 4705.66            | 2.524                          | 1148.62            | 2899.58            |
| A_68_P27550009 | chr10:129907495-129907539                         | NM_001103366:26919  | Vmn2r87       | DOWNSTREAM             | 0.760                                                        | 0.634                          | 1197.02            | 758.96             | 0.482                          | 1020.47            | 492.01             |
| A_68_P26038239 | chr8:90467780-90467824                            | NM_033327:15692     | Zfp423        | INSIDE                 | 0.760                                                        | 0.647                          | 1397.64            | 904.92             | 0.492                          | 1151.65            | 566.68             |
| A_68_P20141346 | chr1:34987069-34987113                            |                     |               | Unknown                | 0.760                                                        | 1.891                          | 1648.35            | 3117.82            | 1.438                          | 1392.47            | 2002.71            |
| A_68_P29613385 | chr14:55251451-55251495                           | NM_199470:8729      | Cdh24         | INSIDE                 | 0.759                                                        | 2.608                          | 1494.81            | 3898.76            | 1.980                          | 1253.70            | 2482.55            |
| A_68_P23229781 | chr4:116229645-116229689                          | NM_029868:-665      | Gbp111        | DIVERGENT_PROMOTER     | 0.759                                                        | 0.603                          | 1409.91            | 850.32             | 0.458                          | 1098.76            | 502.84             |
| A_68_P21978658 | chr3:20054786-20054830                            | NM_013755:187       | Gyg           | INSIDE                 | 0.759                                                        | 2.439                          | 618.07             | 1507.64            | 1.851                          | 605.46             | 1120.50            |
| A_68_P20296825 | chr1:65225492-65225536                            | NM_010497:202       | Idh1          | INSIDE                 | 0.759                                                        | 0.505                          | 1519.66            | 767.93             | 0.384                          | 1313.12            | 503.72             |
| A_68_P28596608 | chr12:85489337-85489381                           | NM_027438:81        | Pnma1         | INSIDE                 | 0.759                                                        | 0.737                          | 2839.95            | 2093.83            | 0.559                          | 2171.61            | 1214.88            |
| A_68_P27278631 | chr10:79202347-79202393                           | NM_172551:6956      | Polrmt        | INSIDE                 | 0.759                                                        | 2.068                          | 895.96             | 1852.57            | 1.569                          | 698.73             | 1096.52            |
| A_68_P31932823 | chr19:6118207-6118251                             | NM_133678:358       | Sac3d1        | INSIDE                 | 0.759                                                        | 2.699                          | 904.96             | 2442.85            | 2.048                          | 856.42             | 1754.36            |
| A_68_P31236175 | chr17:51951926-51951970                           | NM_001163630:-569   | Satb1         | PROMOTER               | 0.759                                                        | 0.674                          | 1664.32            | 1122.45            | 0.512                          | 1312.62            | 671.70             |
| A_68_P20455841 | chr1:95375481-95375525                            | NM_001159717:-67    | Septin2       | DIVERGENT_PROMOTER     | 0.759                                                        | 0.398                          | 1663.92            | 661.52             | 0.302                          | 1383.89            | 417.50             |
| A_68_P32109940 | chr19:40686579-40686623                           | NM_026260:105       | Tctn3         | INSIDE                 | 0.759                                                        | 4.481                          | 1221.25            | 5472.18            | 3.399                          | 1266.94            | 4306.96            |
| A_68_P25032376 | chr7:31371948-31371992                            | NM_029274:1775      | Wbp7          | INSIDE                 | 0.759                                                        | 2.098                          | 814.25             | 1708.65            | 1.593                          | 662.89             | 1056.20            |
| A_68_P30490574 | chr15:101076776-101076820                         |                     |               | Unknown                | 0.759                                                        | 0.481                          | 1391.82            | 669.76             | 0.365                          | 1043.46            | 380.88             |
| A_68_P27271358 | chr10:77441308-77441352                           | NM_026431:-64       | 1810043G02Rik | DIVERGENT_PROMOTER     | 0.758                                                        | 1.961                          | 1246.24            | 2443.34            | 1.487                          | 1153.05            | 1714.29            |
| A_68_P25585260 | chr7:148041975-148042019                          | NM_018742:286       | Bet11         | INSIDE                 | 0.758                                                        | 0.488                          | 1542.26            | 753.09             | 0.370                          | 1092.19            | 404.26             |
| A_68_P21564013 | chr2:118256823-118256868                          | NM_001177806:41998  | Eif2ak4       | INSIDE                 | 0.758                                                        | 2.785                          | 1532.47            | 4268.20            | 2.110                          | 1067.99            | 2675.63            |
| A_68_P32227241 | chr19:60865885-60865929                           | NM_010123:690       | Eif3a         | INSIDE                 | 0.758                                                        | 0.678                          | 960.48             | 651.26             | 0.514                          | 819.74             | 421.14             |
| A_68_P24928967 | chr6:146450896-146450940                          | NM_010586:-484      | Itpr2         | PROMOTER               | 0.758                                                        | 0.356                          | 1794.69            | 638.29             | 0.270                          | 1589.18            | 428.59             |
| A_68_P32136319 | chr19:45151445-45151489                           | NM_178929:838       | Kazald1       | INSIDE                 | 0.758                                                        | 0.469                          | 1280.83            | 600.24             | 0.355                          | 1073.67            | 381.52             |



| ProbeName      | Target position of probe on CpG island microarray | TargetID               | GeneSymbol | CpG island Description | Ratio of relative methylation (TiO <sub>2</sub> -NP/Vehicle) | Sham group                     |                    |                    | TiO <sub>2</sub> -H group      |                    |                    |
|----------------|---------------------------------------------------|------------------------|------------|------------------------|--------------------------------------------------------------|--------------------------------|--------------------|--------------------|--------------------------------|--------------------|--------------------|
|                |                                                   |                        |            |                        |                                                              | Relative methylation (Cy5/Cy3) | Cy3 signal (Input) | Cy5 signal (MeDIP) | Relative methylation (Cy5/Cy3) | Cy3 signal (Input) | Cy5 signal (MeDIP) |
| A_68_P26216539 | chr8:122394248-122394292                          | NM_146219:8066         | Klhl36     | INSIDE                 | 0.758                                                        | 2.590                          | 433.49             | 1122.73            | 1.963                          | 403.03             | 790.94             |
| A_68_P20156378 | chr1:37932157-37932205                            | NM_001037918:3130      | Lipt1      | INSIDE                 | 0.758                                                        | 2.314                          | 1086.00            | 2512.84            | 1.753                          | 870.77             | 1526.44            |
| A_68_P25905384 | chr8:63111913-63111957                            | NM_027756:278          | Mfap3l     | INSIDE                 | 0.758                                                        | 0.718                          | 2065.69            | 1482.91            | 0.544                          | 1624.78            | 884.54             |
| A_68_P21742299 | chr2:150834816-150834860                          | NM_207204:296          | Ninl       | INSIDE                 | 0.758                                                        | 0.673                          | 1031.21            | 694.51             | 0.511                          | 931.31             | 475.46             |
| A_68_P23540260 | chr5:23670805-23670849                            | NM_153092:46           | Nupl2      | INSIDE                 | 0.758                                                        | 0.682                          | 1158.84            | 790.44             | 0.517                          | 979.55             | 506.17             |
| A_68_P31207757 | chr17:46728534-46728578                           | NM_175168:37897        | Ptk7       | INSIDE                 | 0.758                                                        | 2.805                          | 1181.71            | 3314.18            | 2.127                          | 970.73             | 2064.31            |
| A_68_P28054016 | chr11:97888717-97888766                           | NM_009078:504          | Rpl19      | INSIDE                 | 0.758                                                        | 0.557                          | 1297.13            | 722.96             | 0.422                          | 847.78             | 358.09             |
| A_68_P25735818 | chr8:28090001-28090046                            | NM_001101502:2216      | Zfp703     | INSIDE                 | 0.758                                                        | 0.716                          | 1362.21            | 975.21             | 0.543                          | 1212.30            | 658.17             |
| A_68_P26181049 | chr8:116372565-116372609                          | NM_172466:153          | Adams18    | INSIDE                 | 0.757                                                        | 0.570                          | 1293.42            | 737.73             | 0.432                          | 1091.80            | 471.19             |
| A_68_P21105433 | chr2:30679802-30679847                            | NM_133346:3996         | Asb6       | INSIDE                 | 0.757                                                        | 2.705                          | 2329.11            | 6299.81            | 2.047                          | 1769.42            | 3621.35            |
| A_68_P21760472 | chr2:154262476-154262520                          | NM_009823:279          | Cbfa2l2    | INSIDE                 | 0.757                                                        | 0.674                          | 2507.16            | 1689.71            | 0.510                          | 2109.18            | 1075.58            |
| A_68_P25950969 | chr8:72826268-72826312                            | NM_001024922:61        | Ddx49      | INSIDE                 | 0.757                                                        | 0.670                          | 1826.64            | 1223.43            | 0.507                          | 1590.87            | 806.81             |
| A_68_P25737430 | chr8:28371048-28371092                            | NM_007918:272          | Eif4ebp1   | INSIDE                 | 0.757                                                        | 0.626                          | 1433.30            | 897.06             | 0.474                          | 1305.78            | 618.34             |
| A_68_P21477092 | chr2:102291506-102291550                          | NM_010218:421          | Fjx1       | INSIDE                 | 0.757                                                        | 2.283                          | 509.09             | 1162.05            | 1.729                          | 542.88             | 938.61             |
| A_68_P23246060 | chr4:119212433-119212477                          | NM_172699:162          | Foxj3      | INSIDE                 | 0.757                                                        | 0.625                          | 1072.63            | 670.57             | 0.473                          | 947.00             | 448.19             |
| A_68_P27286725 | chr10:80448582-80448626                           | NM_001038655:15506     | Gng7       | INSIDE                 | 0.757                                                        | 0.661                          | 1736.38            | 1148.38            | 0.501                          | 1473.60            | 737.76             |
| A_68_P30485949 | chr15:100299584-100299628                         | NM_134093:142          | Letmd1     | INSIDE                 | 0.757                                                        | 0.604                          | 1297.60            | 784.07             | 0.458                          | 1052.01            | 481.33             |
| A_68_P27536275 | chr10:126950036-126950080                         | NM_001098789:-1936     | Ndufa4l2   | PROMOTER               | 0.757                                                        | 0.639                          | 1063.39            | 679.54             | 0.484                          | 908.51             | 439.54             |
| A_68_P28057357 | chr11:98448589-98448634                           | NM_025661:-52          | Ormdl3     | PROMOTER               | 0.757                                                        | 0.348                          | 1863.58            | 648.73             | 0.263                          | 1600.82            | 421.77             |
| A_68_P23323176 | chr4:134063064-134063108                          | NM_027995:10194        | Paqr7      | INSIDE                 | 0.757                                                        | 2.679                          | 815.00             | 2183.22            | 2.028                          | 747.79             | 1516.59            |
| A_68_P32131423 | chr19:44358700-44358744                           | NM_009128:-9443        | Scd2       | PROMOTER               | 0.757                                                        | 0.541                          | 1566.89            | 847.32             | 0.409                          | 1128.78            | 462.02             |
| A_68_P24130913 | chr5:139060841-139060885                          | NM_001044747:109       | Zfp68      | INSIDE                 | 0.757                                                        | 0.516                          | 1986.28            | 1025.87            | 0.391                          | 1559.51            | 610.06             |
| A_68_P27776268 | chr11:47802068-47802112                           | ENSMUST00000128558:381 |            | INSIDE                 | 0.757                                                        | 0.641                          | 1684.77            | 1080.17            | 0.485                          | 1435.01            | 696.51             |
| A_68_P23171814 | chr4:104040511-104040555                          | NM_177259:357          | Dab1       | INSIDE                 | 0.756                                                        | 0.571                          | 968.88             | 552.89             | 0.432                          | 760.52             | 328.23             |
| A_68_P31330905 | chr17:71167433-71167477                           | NM_001128180:296005    | Dlgap1     | INSIDE                 | 0.756                                                        | 2.089                          | 658.75             | 1375.98            | 1.578                          | 553.61             | 873.86             |
| A_68_P26350080 | chr9:21823071-21823117                            | NM_010487:33373        | Elavl3     | INSIDE                 | 0.756                                                        | 2.159                          | 777.11             | 1677.74            | 1.633                          | 600.90             | 981.12             |
| A_68_P23979394 | chr5:110815716-110815760                          | NM_028596:408          | Fbrs1l     | INSIDE                 | 0.756                                                        | 0.738                          | 3010.58            | 2222.21            | 0.558                          | 2223.41            | 1239.94            |
| A_68_P23145552 | chr4:99323494-99323538                            | NM_010425:527          | Foxd3      | INSIDE                 | 0.756                                                        | 0.505                          | 1295.31            | 654.10             | 0.382                          | 1097.70            | 419.09             |
| A_68_P24112564 | chr5:134789737-134789781                          | NM_001080746:858       | Gtf2i      | INSIDE                 | 0.756                                                        | 0.620                          | 1754.63            | 1087.85            | 0.468                          | 1589.47            | 744.53             |
| A_68_P27845572 | chr11:60745829-60745873                           | NM_008928:292          | Map2k3     | INSIDE                 | 0.756                                                        | 0.680                          | 1126.32            | 766.36             | 0.515                          | 966.93             | 497.51             |
| A_68_P31849791 | chr18:78033691-78033735                           | NM_013831:424          | Pstpip2    | INSIDE                 | 0.756                                                        | 1.932                          | 5337.41            | 10313.82           | 1.461                          | 3912.21            | 5715.55            |
| A_68_P30497429 | chr15:102186223-102186267                         | NM_153416:-5054        | Aaas       | PROMOTER               | 0.755                                                        | 0.663                          | 3145.72            | 2086.45            | 0.501                          | 2468.30            | 1235.46            |
| A_68_P24540596 | chr6:72185582-72185630                            | NM_153778:-35          | Atoh8      | PROMOTER               | 0.755                                                        | 0.590                          | 867.71             | 512.14             | 0.446                          | 620.60             | 276.64             |
| A_68_P27649724 | chr11:24064291-24064335                           | NM_001159290:83618     | Bell1a     | INSIDE                 | 0.755                                                        | 2.343                          | 442.71             | 1037.30            | 1.769                          | 402.21             | 711.51             |
| A_68_P27954533 | chr11:80289924-80289969                           | NM_009871:-601         | Cdk5r1     | PROMOTER               | 0.755                                                        | 0.507                          | 1243.18            | 629.77             | 0.382                          | 1007.76            | 385.32             |
| A_68_P25083582 | chr7:50931965-50932009                            | NM_145582:4586         | Ctu1       | INSIDE                 | 0.755                                                        | 2.110                          | 1462.65            | 3085.89            | 1.594                          | 1172.14            | 1868.01            |
| A_68_P31677781 | chr18:46757255-46757299                           | NM_010120:-81          | Eif1a      | DIVERGENT_PROMOTER     | 0.755                                                        | 0.546                          | 3993.45            | 2181.56            | 0.412                          | 3065.18            | 1263.66            |
| A_68_P22314312 | chr3:88336667-88336711                            | NM_001029890:372       | Mex3a      | INSIDE                 | 0.755                                                        | 0.570                          | 1102.56            | 628.68             | 0.431                          | 851.84             | 366.92             |
| A_68_P24191783 | chr5:151396465-151396509                          | NM_133898:614          | N4bp2ll    | INSIDE                 | 0.755                                                        | 0.592                          | 1243.16            | 735.99             | 0.447                          | 1194.64            | 534.27             |
| A_68_P23527254 | chr5:21181777-21181821                            | NM_178728:25365        | Napepld    | INSIDE                 | 0.755                                                        | 3.177                          | 3711.00            | 11788.84           | 2.400                          | 2694.81            | 6467.31            |
| A_68_P24591291 | chr6:83027998-83028042                            | NM_197992:-363         | Pcgfl1     | DIVERGENT_PROMOTER     | 0.755                                                        | 0.599                          | 1584.73            | 949.18             | 0.452                          | 1261.37            | 570.48             |
| A_68_P24210894 | chr6:5446053-5446097                              | NM_013743:204          | Pdk4       | INSIDE                 | 0.755                                                        | 3.414                          | 601.61             | 2053.74            | 2.578                          | 569.99             | 1469.50            |
| A_68_P24117607 | chr5:136209485-136209529                          | NM_008898:44423        | Por        | INSIDE                 | 0.755                                                        | 2.489                          | 3128.33            | 7787.77            | 1.880                          | 2219.74            | 4172.64            |
| A_68_P20874687 | chr11:182185972-182186016                         | NM_011183:-9913        | Psen2      | PROMOTER               | 0.755                                                        | 0.652                          | 4521.26            | 2947.48            | 0.492                          | 3393.94            | 1670.69            |
| A_68_P24622637 | chr6:88468937-88468981                            | NM_016906:-164         | Sec61a1    | PROMOTER               | 0.755                                                        | 0.733                          | 2086.15            | 1529.15            | 0.553                          | 1699.53            | 940.58             |
| A_68_P20901343 | chr11:187279029-187279073                         | NM_001033286:324       | Slc30a10   | INSIDE                 | 0.755                                                        | 0.721                          | 1790.47            | 1290.22            | 0.544                          | 1479.37            | 804.76             |
| A_68_P27286217 | chr10:80363400-80363444                           | NM_013895:292          | Timm13     | INSIDE                 | 0.755                                                        | 0.630                          | 2361.90            | 1487.33            | 0.476                          | 1899.19            | 903.21             |
| A_68_P31982710 | chr19:16948092-16948136                           | NM_008023:206          | Foxb2      | INSIDE                 | 0.754                                                        | 0.581                          | 1627.07            | 944.66             | 0.438                          | 1381.12            | 604.28             |
| A_68_P27271930 | chr10:77531936-77531980                           | NM_015790:-154         | Icosl      | PROMOTER               | 0.754                                                        | 0.704                          | 1541.96            | 1084.89            | 0.531                          | 1266.54            | 672.13             |
| A_68_P28582489 | chr12:82833007-82833051                           | NM_001174107:49129     | Map3k9     | INSIDE                 | 0.754                                                        | 3.261                          | 915.98             | 2987.43            | 2.458                          | 766.66             | 1884.66            |
| A_68_P25962046 | chr8:75071784-75071828                            | NM_027485:403          | Med26      | INSIDE                 | 0.754                                                        | 0.638                          | 1361.31            | 868.19             | 0.481                          | 1182.74            | 568.46             |

| ProbeName      | Target position of probe on CpG island microarray | TargetID            | GeneSymbol    | CpG island Description | Ratio of relative methylation (TiO <sub>2</sub> -NP/Vehicle) | Sham group                     |                    |                    | TiO <sub>2</sub> -H group      |                    |                    |
|----------------|---------------------------------------------------|---------------------|---------------|------------------------|--------------------------------------------------------------|--------------------------------|--------------------|--------------------|--------------------------------|--------------------|--------------------|
|                |                                                   |                     |               |                        |                                                              | Relative methylation (Cy5/Cy3) | Cy3 signal (Input) | Cy5 signal (MeDIP) | Relative methylation (Cy5/Cy3) | Cy3 signal (Input) | Cy5 signal (MeDIP) |
| A_68_P28051870 | chr11:97521455-97521499                           | NM_1393111-3249     | Mllt6         | PROMOTER               | 0.754                                                        | 0.721                          | 2780.63            | 2005.72            | 0.544                          | 1984.94            | 1079.84            |
| A_68_P31097571 | chr17:24615950-24615994                           | NM_019988:51        | Mlst8         | INSIDE                 | 0.754                                                        | 0.632                          | 1702.66            | 1075.33            | 0.476                          | 1247.26            | 593.98             |
| A_68_P29592280 | chr14:49792675-49792719                           | NM_001081430:795    | Naa30         | INSIDE                 | 0.754                                                        | 0.542                          | 1319.94            | 715.06             | 0.408                          | 1188.63            | 485.30             |
| A_68_P20937887 | chr1:193221193-193221237                          | NM_144880:-294      | Ppp2r5a       | PROMOTER               | 0.754                                                        | 0.735                          | 4797.09            | 3527.03            | 0.555                          | 3232.62            | 1792.69            |
| A_68_P30595532 | chr16:22009791-22009835                           | NM_029457:256       | Senp2         | INSIDE                 | 0.754                                                        | 2.209                          | 909.67             | 2009.73            | 1.666                          | 866.73             | 1444.15            |
| A_68_P20720491 | chr1:154233746-154233790                          | NM_025677:44        | Tsen15        | INSIDE                 | 0.754                                                        | 0.671                          | 1296.27            | 870.40             | 0.506                          | 1211.01            | 613.06             |
| A_68_P24954141 | chr7:6084325-6084369                              | NM_001013012:23227  | Zfp787        | INSIDE                 | 0.754                                                        | 2.601                          | 572.12             | 1487.91            | 1.962                          | 568.35             | 1115.10            |
| A_68_P26663733 | chr9:79190276-79190323                            |                     |               | Unknown                | 0.754                                                        | 2.407                          | 728.53             | 1753.93            | 1.816                          | 584.46             | 1061.15            |
| A_68_P28073804 | chr11:101286517-101286561                         | NM_026865:109       | 1700113122Rik | INSIDE                 | 0.753                                                        | 0.526                          | 1924.87            | 1012.70            | 0.396                          | 1625.19            | 643.76             |
| A_68_P26055366 | chr8:93352604-93352648                            | NM_177224:-107      | Chd9          | PROMOTER               | 0.753                                                        | 0.569                          | 1158.12            | 659.34             | 0.429                          | 1119.20            | 479.78             |
| A_68_P31208133 | chr17:46789942-46789986                           | NM_025611:2678      | Cul7          | INSIDE                 | 0.753                                                        | 2.865                          | 3707.29            | 10622.66           | 2.157                          | 2555.40            | 5511.77            |
| A_68_P26247505 | chr8:127275218-127275262                          | NM_001081120:469    | Fam89a        | INSIDE                 | 0.753                                                        | 2.104                          | 709.52             | 1492.61            | 1.584                          | 673.57             | 1067.04            |
| A_68_P29717291 | chr14:73785051-73785095                           | NM_008410:6         | Itm2b         | INSIDE                 | 0.753                                                        | 0.679                          | 1181.56            | 801.90             | 0.511                          | 1101.28            | 562.78             |
| A_68_P28745984 | chr12:113012732-113012779                         | NM_008450:15696     | Klc1          | INSIDE                 | 0.753                                                        | 2.645                          | 854.57             | 2260.20            | 1.992                          | 698.98             | 1392.71            |
| A_68_P21628851 | chr2:130099810-130099854                          | NM_024193:-315      | Nop56         | PROMOTER               | 0.753                                                        | 0.589                          | 1529.59            | 901.16             | 0.444                          | 1210.99            | 537.31             |
| A_68_P21395952 | chr2:84877451-84877495                            | NM_001136081:-135   | Ssrp1         | PROMOTER               | 0.753                                                        | 0.596                          | 1794.59            | 1069.29            | 0.449                          | 1444.64            | 648.39             |
| A_68_P28055913 | chr11:98219858-98219902                           | NM_021547:183       | Stard3        | INSIDE                 | 0.753                                                        | 0.716                          | 2720.50            | 1948.43            | 0.539                          | 2111.90            | 1138.81            |
| A_68_P22889664 | chr4:46627300-46627344                            | NM_198664:35749     | Tbc1d2        | INSIDE                 | 0.753                                                        | 2.081                          | 557.89             | 1161.08            | 1.567                          | 563.03             | 882.42             |
| A_68_P25182468 | chr7:72515865-72515909                            | NM_001163574:244    | Tjp1          | INSIDE                 | 0.753                                                        | 0.586                          | 1586.09            | 929.94             | 0.442                          | 1289.18            | 569.52             |
| A_68_P31304162 | chr17:66425686-66425730                           | NM_001025572:678    | Ankrd12       | INSIDE                 | 0.752                                                        | 0.397                          | 2334.54            | 929.33             | 0.299                          | 1889.54            | 564.05             |
| A_68_P24791291 | chr6:119058809-119058853                          | NM_001159533:-623   | Caena1c       | PROMOTER               | 0.752                                                        | 0.692                          | 2040.00            | 1410.94            | 0.520                          | 1732.21            | 901.24             |
| A_68_P26971595 | chr10:17442918-17442962                           | NM_010828:-93       | Cited2        | PROMOTER               | 0.752                                                        | 0.576                          | 938.19             | 540.81             | 0.433                          | 818.80             | 354.79             |
| A_68_P21580440 | chr2:121180697-121180741                          | NM_009897:-3658     | Ckmt1         | DIVERGENT_PROMOTER     | 0.752                                                        | 6.892                          | 4393.71            | 30282.69           | 5.184                          | 2731.70            | 14160.44           |
| A_68_P23609422 | chr5:37139552-37139596                            | NM_133724:344       | Cno           | INSIDE                 | 0.752                                                        | 0.492                          | 1658.57            | 815.97             | 0.370                          | 1640.05            | 540.27             |
| A_68_P33015623 | chr1_random:50870-50914                           | NM_026866:134446    | Disp1         | INSIDE                 | 0.752                                                        | 3.859                          | 1595.54            | 6157.32            | 2.904                          | 1232.47            | 3578.90            |
| A_68_P28177057 | chr11:119160971-119161015                         | NM_138669:365       | Eif4a3        | INSIDE                 | 0.752                                                        | 0.390                          | 1541.60            | 600.45             | 0.293                          | 1295.08            | 379.40             |
| A_68_P32219571 | chr19:59533895-59533939                           | NM_010132:737       | Emx2          | INSIDE                 | 0.752                                                        | 0.563                          | 1134.53            | 638.74             | 0.424                          | 950.58             | 402.58             |
| A_68_P30956557 | chr16:90387057-90387101                           | NM_015755:437       | Hunk          | INSIDE                 | 0.752                                                        | 0.529                          | 1991.11            | 1054.18            | 0.398                          | 1469.10            | 584.63             |
| A_68_P25091032 | chr7:52332198-52332242                            | NM_001163684:14422  | Nosip         | INSIDE                 | 0.752                                                        | 2.002                          | 1318.48            | 2639.36            | 1.506                          | 904.93             | 1362.80            |
| A_68_P27611243 | chr11:16407800-16407844                           | NM_001109971:665    | Sec61g        | INSIDE                 | 0.752                                                        | 0.652                          | 1432.70            | 933.91             | 0.490                          | 1144.58            | 561.39             |
| A_68_P23897742 | chr5:93522042-93522086                            | NM_001009818:-418   | Septin1       | PROMOTER               | 0.752                                                        | 0.717                          | 1741.64            | 1249.06            | 0.540                          | 1356.56            | 732.01             |
| A_68_P29614992 | chr14:55530977-55531021                           | NM_021551:971       | Sle22a17      | INSIDE                 | 0.752                                                        | 0.620                          | 1021.78            | 633.54             | 0.466                          | 843.41             | 393.24             |
| A_68_P24979889 | chr7:16726009-16726053                            | NM_148946:10382     | Sle8a2        | INSIDE                 | 0.752                                                        | 2.400                          | 4234.24            | 10163.72           | 1.806                          | 3078.32            | 5559.76            |
| A_68_P26736540 | chr9:94437557-94437601                            | NM_001033145:922    | 1190002N15Rik | INSIDE                 | 0.751                                                        | 0.547                          | 1626.04            | 888.99             | 0.410                          | 1220.65            | 500.90             |
| A_68_P27282403 | chr10:79777962-79778006                           | NM_011789:13420     | Apc2          | INSIDE                 | 0.751                                                        | 2.485                          | 490.80             | 1219.72            | 1.867                          | 439.35             | 820.19             |
| A_68_P21906146 | chr2:180511719-180511763                          | NM_080641:-135      | Bhlhe23       | PROMOTER               | 0.751                                                        | 0.632                          | 1411.97            | 892.71             | 0.475                          | 1177.13            | 559.12             |
| A_68_P27171639 | chr10:59414574-59414618                           | NM_029083:-78       | Ddit4         | PROMOTER               | 0.751                                                        | 0.433                          | 2092.76            | 906.95             | 0.325                          | 1767.82            | 575.18             |
| A_68_P27930669 | chr11:76030890-76030934                           | NM_177367:162       | Gemin4        | INSIDE                 | 0.751                                                        | 0.576                          | 910.93             | 524.30             | 0.432                          | 839.85             | 362.98             |
| A_68_P25496224 | chr7:132851162-132851206                          | NM_207239:18        | Gtf3e1        | INSIDE                 | 0.751                                                        | 0.609                          | 1123.97            | 684.17             | 0.457                          | 982.70             | 449.00             |
| A_68_P29330352 | chr13:112539067-112539121                         | NM_011945:60097     | Map3k1        | INSIDE                 | 0.751                                                        | 4.470                          | 442.35             | 1977.27            | 3.356                          | 346.72             | 1163.63            |
| A_68_P27259065 | chr10:75322775-75322819                           | NM_010798:199       | Mif           | INSIDE                 | 0.751                                                        | 0.556                          | 1341.18            | 745.86             | 0.418                          | 1150.90            | 480.66             |
| A_68_P29368029 | chr13:119175953-119175997                         | NM_021556:85        | Mrps30        | INSIDE                 | 0.751                                                        | 0.641                          | 1004.96            | 643.91             | 0.481                          | 879.71             | 423.40             |
| A_68_P27940747 | chr11:77796871-77796915                           | NM_174852:575       | Phf12         | INSIDE                 | 0.751                                                        | 0.648                          | 897.70             | 581.29             | 0.486                          | 772.41             | 375.55             |
| A_68_P30364608 | chr15:78971835-78971879                           | NM_027231:60        | Polr2f        | INSIDE                 | 0.751                                                        | 0.699                          | 1185.84            | 829.23             | 0.525                          | 972.15             | 510.85             |
| A_68_P21116391 | chr2:32467758-32467803                            | NM_001025310:5300   | St6galnac6    | INSIDE                 | 0.751                                                        | 1.937                          | 1672.81            | 3239.78            | 1.454                          | 1182.19            | 1718.33            |
| A_68_P30960422 | chr16:91011625-91011669                           | NM_001164483:-93    | Synj1         | PROMOTER               | 0.751                                                        | 0.626                          | 977.14             | 611.95             | 0.471                          | 754.40             | 354.98             |
| A_68_P22144349 | chr3:53667639-53667683                            | NM_026435:69        | Ufm1          | INSIDE                 | 0.751                                                        | 0.512                          | 3239.67            | 1657.93            | 0.384                          | 2500.67            | 961.49             |
| A_68_P24087712 | chr5:129731705-129731749                          |                     |               | Unknown                | 0.751                                                        | 1.961                          | 1658.56            | 3252.40            | 1.473                          | 1286.91            | 1895.39            |
| A_68_P27473553 | chr10:115550386-115550437                         | NM_001161855:562    | 4933416C03Rik | INSIDE                 | 0.750                                                        | 3.151                          | 737.92             | 2325.49            | 2.364                          | 646.11             | 1527.30            |
| A_68_P21061192 | chr2:22895312-22895356                            | NM_001077190:426    | Abi1          | INSIDE                 | 0.750                                                        | 0.536                          | 1825.15            | 978.84             | 0.402                          | 1397.45            | 562.12             |
| A_68_P27334200 | chr10:89512839-89512884                           | NM_001128086:176608 | Anks1b        | INSIDE                 | 0.750                                                        | 2.019                          | 1687.64            | 3406.94            | 1.513                          | 1290.95            | 1953.63            |

| ProbeName      | Target position of probe on CpG island microarray | TargetID           | GeneSymbol    | CpG island Description | Ratio of relative methylation (TiO <sub>2</sub> -NP/Vehicle) | Sham group                     |                    |                    | TiO <sub>2</sub> -H group      |                    |                    |
|----------------|---------------------------------------------------|--------------------|---------------|------------------------|--------------------------------------------------------------|--------------------------------|--------------------|--------------------|--------------------------------|--------------------|--------------------|
|                |                                                   |                    |               |                        |                                                              | Relative methylation (Cy5/Cy3) | Cy3 signal (Input) | Cy5 signal (MeDIP) | Relative methylation (Cy5/Cy3) | Cy3 signal (Input) | Cy5 signal (MeDIP) |
| A_68_P24098213 | chr5:131915558-131915602                          | NM_177047:1102633  | Auts2         | INSIDE                 | 0.750                                                        | 2.228                          | 1972.61            | 4394.55            | 1.670                          | 1390.00            | 2321.41            |
| A_68_P33015612 | chr1_random:49603-49647                           | NM_026866:135714   | Disp1         | INSIDE                 | 0.750                                                        | 2.479                          | 1203.91            | 2984.80            | 1.859                          | 1021.81            | 1899.87            |
| A_68_P25020502 | chr7:28955130-28955174                            | NM_007991:386      | Fbl           | INSIDE                 | 0.750                                                        | 0.657                          | 2086.21            | 1371.33            | 0.493                          | 1500.51            | 740.20             |
| A_68_P25021326 | chr7:29135937-29135981                            | NR_028129:-600     | LOC100302567  | PROMOTER               | 0.750                                                        | 0.704                          | 1843.72            | 1297.36            | 0.528                          | 1495.25            | 789.25             |
| A_68_P28744813 | chr12:112812529-112812573                         | NM_021516:-170     | Mark3         | PROMOTER               | 0.750                                                        | 0.446                          | 1177.91            | 524.85             | 0.334                          | 974.47             | 325.59             |
| A_68_P31258177 | chr17:56896595-56896639                           | NM_008738:337      | Nrtn          | INSIDE                 | 0.750                                                        | 0.545                          | 3023.00            | 1646.40            | 0.409                          | 2590.97            | 1058.68            |
| A_68_P25370884 | chr7:108146949-108146996                          | NM_008773:13533    | P2ry2         | INSIDE                 | 0.750                                                        | 2.333                          | 1304.45            | 3043.77            | 1.751                          | 957.93             | 1677.20            |
| A_68_P22313387 | chr3:88169930-88169974                            | NM_198410:1442     | Paqr6         | INSIDE                 | 0.750                                                        | 1.968                          | 2552.37            | 5021.94            | 1.476                          | 1726.13            | 2547.70            |
| A_68_P26350662 | chr9:21961189-21961233                            | NM_001082532:-79   | Pigyl         | PROMOTER               | 0.750                                                        | 0.662                          | 1722.82            | 1139.74            | 0.496                          | 1384.66            | 687.40             |
| A_68_P20937880 | chr1:193219969-193220013                          | NM_144880:930      | Ppp2r5a       | INSIDE                 | 0.750                                                        | 0.705                          | 3049.39            | 2150.18            | 0.529                          | 2310.78            | 1221.66            |
| A_68_P21006980 | chr2:11524509-11524553                            | NM_152824:296      | Rbm17         | INSIDE                 | 0.750                                                        | 0.597                          | 1178.71            | 703.93             | 0.448                          | 1072.30            | 480.38             |
| A_68_P31093845 | chr17:23957117-23957161                           | NM_175229:16985    | Srrm2         | INSIDE                 | 0.750                                                        | 3.152                          | 605.41             | 1908.04            | 2.365                          | 464.21             | 1097.79            |
| A_68_P27579286 | chr11:8564350-8564394                             | NM_001083587:166   | Tns3          | INSIDE                 | 0.750                                                        | 0.601                          | 1095.69            | 658.29             | 0.451                          | 932.85             | 420.27             |
| A_68_P25589083 | chr7:148661175-148661219                          | NM_053082:58       | Tspan4        | INSIDE                 | 0.750                                                        | 0.540                          | 2771.04            | 1495.93            | 0.405                          | 2237.84            | 906.18             |
| A_68_P26335720 | chr9:17902560-17902604                            |                    |               | Unknown                | 0.750                                                        | 1.957                          | 959.13             | 1877.38            | 1.467                          | 804.56             | 1180.66            |
| A_68_P28532686 | chr12:73637244-73637288                           | NM_026327:-77      | 1810048J11Rik | PROMOTER               | 0.749                                                        | 0.704                          | 1631.30            | 1147.95            | 0.527                          | 1232.10            | 649.34             |
| A_68_P23019856 | chr4:73897951-73897995                            | NM_144787:190      | Kdm4c         | INSIDE                 | 0.749                                                        | 0.531                          | 1555.39            | 825.86             | 0.397                          | 1346.46            | 535.15             |
| A_68_P24159376 | chr5:144861468-144861512                          | NM_001081109:186   | Lmtk2         | INSIDE                 | 0.749                                                        | 0.611                          | 1453.21            | 887.21             | 0.457                          | 1219.88            | 557.86             |
| A_68_P24993270 | chr7:20014656-20014700                            | NM_172279:29165    | Mark4         | INSIDE                 | 0.749                                                        | 4.542                          | 4624.11            | 21004.36           | 3.403                          | 3072.09            | 10453.33           |
| A_68_P23429537 | chr4:153545094-153545138                          | NM_001162977:295   | Megf6         | INSIDE                 | 0.749                                                        | 0.537                          | 1432.78            | 769.90             | 0.403                          | 1090.70            | 439.24             |
| A_68_P25578896 | chr7:146768160-146768204                          | NR_027857:514      | Nkx6-2        | INSIDE                 | 0.749                                                        | 0.600                          | 880.27             | 527.83             | 0.449                          | 800.52             | 359.69             |
| A_68_P23401741 | chr4:149029526-149029570                          | NM_001164052:7877  | Pik3cd        | INSIDE                 | 0.749                                                        | 2.242                          | 1693.63            | 3797.84            | 1.679                          | 1212.25            | 2035.00            |
| A_68_P25239156 | chr7:82453635-82453679                            | NM_001109753:-384  | Sv2b          | PROMOTER               | 0.749                                                        | 0.630                          | 1083.00            | 682.11             | 0.472                          | 815.96             | 385.07             |
| A_68_P25399113 | chr7:114514015-114514059                          | NM_021889:-267     | Syt9          | PROMOTER               | 0.749                                                        | 2.842                          | 822.03             | 2335.96            | 2.130                          | 756.97             | 1612.02            |
| A_68_P30133049 | chr15:35300992-35301036                           | NM_177151:-286     | Vps13b        | PROMOTER               | 0.749                                                        | 0.638                          | 1851.27            | 1180.39            | 0.478                          | 1585.07            | 757.08             |
| A_68_P21425962 | chr2:91848767-91848819                            | NM_011957:15535    | Creb3l1       | INSIDE                 | 0.748                                                        | 0.613                          | 1134.88            | 696.16             | 0.459                          | 924.58             | 424.30             |
| A_68_P26224616 | chr8:123641972-123642016                          | NM_013519:1924     | Foxc2         | INSIDE                 | 0.748                                                        | 0.452                          | 2059.33            | 930.75             | 0.338                          | 1502.21            | 508.14             |
| A_68_P23451690 | chr5:4757789-4757833                              | NM_021457:406      | Fzd1          | INSIDE                 | 0.748                                                        | 0.615                          | 1147.11            | 705.82             | 0.460                          | 1101.05            | 506.77             |
| A_68_P29626124 | chr14:57723397-57723441                           | NM_008125:121      | Gjb2          | INSIDE                 | 0.748                                                        | 0.424                          | 1340.57            | 568.86             | 0.317                          | 1178.80            | 374.04             |
| A_68_P23438939 | chr4:154865343-154865387                          | NM_001160016:-105  | Gnb1          | PROMOTER               | 0.748                                                        | 0.373                          | 1696.09            | 632.47             | 0.279                          | 1477.08            | 412.14             |
| A_68_P26458702 | chr9:42753013-42753057                            | NM_175481:-580     | Grik4         | PROMOTER               | 0.748                                                        | 0.643                          | 1128.46            | 725.18             | 0.480                          | 959.40             | 460.92             |
| A_68_P28043961 | chr11:96207239-96207283                           | NM_010458:2178     | Hoxb3         | INSIDE                 | 0.748                                                        | 0.588                          | 1999.34            | 1175.51            | 0.440                          | 1528.78            | 672.33             |
| A_68_P24804132 | chr6:121363263-121363307                          | NM_001033354:60412 | Iqsec3        | INSIDE                 | 0.748                                                        | 2.426                          | 1272.67            | 3088.05            | 1.816                          | 1111.19            | 2017.95            |
| A_68_P21901578 | chr2:179854064-179854108                          | NM_144500:16       | Osbpl2        | INSIDE                 | 0.748                                                        | 0.741                          | 5590.34            | 4140.89            | 0.554                          | 4519.93            | 2504.22            |
| A_68_P25184943 | chr7:73007475-73007519                            | NM_011048:475      | Pesk6         | INSIDE                 | 0.748                                                        | 0.465                          | 1906.94            | 887.49             | 0.348                          | 1627.15            | 566.42             |
| A_68_P31405197 | chr17:84911642-84911686                           | NM_177606:430      | Plekhh2       | INSIDE                 | 0.748                                                        | 0.549                          | 1423.60            | 781.66             | 0.411                          | 1182.80            | 485.68             |
| A_68_P27954013 | chr11:80196733-80196777                           | NM_001130169:-26   | Zfp207        | DIVERGENT_PROMOTER     | 0.748                                                        | 0.602                          | 1654.08            | 996.38             | 0.450                          | 1408.10            | 634.05             |
| A_68_P21079937 | chr2:26459672-26459716                            | NM_026212:36       | Agpat2        | INSIDE                 | 0.747                                                        | 2.206                          | 12143.17           | 26784.43           | 1.648                          | 8004.23            | 13189.17           |
| A_68_P22407401 | chr3:107398395-107398439                          | NM_007441:468      | Alix3         | INSIDE                 | 0.747                                                        | 0.441                          | 1273.71            | 562.26             | 0.330                          | 1113.66            | 367.35             |
| A_68_P27968098 | chr11:82577707-82577751                           | NM_009839:62       | Cet6b         | INSIDE                 | 0.747                                                        | 0.572                          | 1245.05            | 711.70             | 0.427                          | 1114.39            | 475.64             |
| A_68_P22412528 | chr3:108217361-108217405                          | NM_001004177:1030  | Celsr2        | INSIDE                 | 0.747                                                        | 2.251                          | 1216.99            | 2739.76            | 1.681                          | 914.50             | 1537.70            |
| A_68_P23331195 | chr4:135472662-135472706                          | NM_009924:21366    | Cnr2          | INSIDE                 | 0.747                                                        | 1.927                          | 1631.80            | 3144.12            | 1.439                          | 1254.78            | 1805.74            |
| A_68_P24226570 | chr6:8459130-8459177                              | NM_133236:-442     | Glicc1        | PROMOTER               | 0.747                                                        | 0.715                          | 1468.06            | 1050.04            | 0.534                          | 1099.51            | 587.09             |
| A_68_P29302881 | chr13:107811807-107811851                         | NM_001145779:366   | Kif2a         | INSIDE                 | 0.747                                                        | 0.571                          | 2198.80            | 1255.71            | 0.427                          | 1683.25            | 718.27             |
| A_68_P25360742 | chr7:106416261-106416305                          | NM_001043355:-573  | Mtap6         | PROMOTER               | 0.747                                                        | 0.572                          | 1035.22            | 591.88             | 0.427                          | 869.05             | 371.18             |
| A_68_P27843265 | chr11:60290482-60290526                           | NM_001103171:7664  | Myo15         | INSIDE                 | 0.747                                                        | 2.556                          | 492.55             | 1259.08            | 1.909                          | 485.20             | 926.12             |
| A_68_P22325403 | chr3:90269219-90269263                            | NM_008727:548      | Npr1          | INSIDE                 | 0.747                                                        | 0.626                          | 3898.33            | 2441.08            | 0.468                          | 3367.22            | 1575.46            |
| A_68_P31106680 | chr17:25981271-25981315                           | NM_145999:504      | Rhot2         | INSIDE                 | 0.747                                                        | 0.702                          | 3811.97            | 2677.90            | 0.525                          | 2639.14            | 1384.61            |
| A_68_P27765281 | chr11:45793634-45793678                           | NM_173384:-155     | Sox30         | PROMOTER               | 0.747                                                        | 2.362                          | 3370.35            | 7960.35            | 1.764                          | 2693.06            | 4749.86            |
| A_68_P26421199 | chr9:35007341-35007385                            | NM_001177847:128   | Tirap         | INSIDE                 | 0.747                                                        | 0.659                          | 4380.39            | 2884.65            | 0.492                          | 3286.97            | 1617.87            |
| A_68_P29428730 | chr14:17197854-17197898                           | NM_009409:157      | Top2b         | INSIDE                 | 0.747                                                        | 0.631                          | 2044.92            | 1290.26            | 0.472                          | 1654.95            | 780.52             |

| ProbeName      | Target position of probe on CpG island microarray | TargetID               | GeneSymbol   | CpG island Description | Ratio of relative methylation (TiO <sub>2</sub> -NP/Vehicle) | Sham group                     |                    |                    | TiO <sub>2</sub> -H group      |                    |                    |
|----------------|---------------------------------------------------|------------------------|--------------|------------------------|--------------------------------------------------------------|--------------------------------|--------------------|--------------------|--------------------------------|--------------------|--------------------|
|                |                                                   |                        |              |                        |                                                              | Relative methylation (Cy5/Cy3) | Cy3 signal (Input) | Cy5 signal (MeDIP) | Relative methylation (Cy5/Cy3) | Cy3 signal (Input) | Cy5 signal (MeDIP) |
| A_68_P20157015 | chr1:38054294-38054338                            | NM_172054:-263         | Txndc9       | DIVERGENT_PROMOTER     | 0.747                                                        | 0.598                          | 1344.44            | 804.56             | 0.447                          | 1056.21            | 472.41             |
| A_68_P27287692 | chr10:80607786-80607830                           | NM_010731:8793         | Zbtb7a       | INSIDE                 | 0.747                                                        | 2.402                          | 526.12             | 1263.92            | 1.794                          | 473.68             | 849.93             |
| A_68_P28068578 | chr11:100388533-100388577                         | NM_001199296:760       | Acly         | INSIDE                 | 0.746                                                        | 0.718                          | 1680.34            | 1206.42            | 0.535                          | 1421.73            | 761.01             |
| A_68_P22408057 | chr3:107499480-107499524                          | NM_145542:-36          | Ahcy11       | PROMOTER               | 0.746                                                        | 0.549                          | 2462.37            | 1350.98            | 0.409                          | 1857.23            | 760.37             |
| A_68_P30480359 | chr15:99300814-99300863                           | NM_029236:4323         | Bedin3d      | INSIDE                 | 0.746                                                        | 2.810                          | 548.82             | 1542.28            | 2.096                          | 469.74             | 984.78             |
| A_68_P31097727 | chr17:24642185-24642229                           | NM_027937:16479        | Caskin1      | INSIDE                 | 0.746                                                        | 2.946                          | 3532.54            | 10408.17           | 2.199                          | 2560.17            | 5629.98            |
| A_68_P26078517 | chr8:97125206-97125250                            | NM_028221:398          | Fam192a      | INSIDE                 | 0.746                                                        | 0.664                          | 1194.97            | 793.17             | 0.495                          | 1048.98            | 519.52             |
| A_68_P24642399 | chr6:91928996-91929040                            | NM_172731:-8085        | Fgd5         | PROMOTER               | 0.746                                                        | 0.589                          | 1297.09            | 764.52             | 0.440                          | 1194.84            | 525.67             |
| A_68_P27827736 | chr11:57641574-57641618                           | NM_008213:4053         | Hand1        | DOWNSTREAM             | 0.746                                                        | 0.664                          | 1261.49            | 838.09             | 0.496                          | 1112.21            | 551.12             |
| A_68_P21527758 | chr2:112079571-112079615                          | NM_207206:-405         | Lpcat4       | PROMOTER               | 0.746                                                        | 0.616                          | 1010.11            | 622.49             | 0.460                          | 911.13             | 419.00             |
| A_68_P21769695 | chr2:155970095-155970139                          | NM_025946:37           | Romo1        | INSIDE                 | 0.746                                                        | 0.541                          | 1864.94            | 1009.46            | 0.404                          | 1528.17            | 617.15             |
| A_68_P27215509 | chr10:67504533-67504577                           | NM_001081346:62209     | Rtkn2        | INSIDE                 | 0.746                                                        | 2.901                          | 595.15             | 1726.72            | 2.163                          | 588.10             | 1272.18            |
| A_68_P21843312 | chr2:168575835-168575879                          | NM_175303:16845        | Sall4        | INSIDE                 | 0.746                                                        | 2.066                          | 1456.62            | 3008.75            | 1.540                          | 1172.05            | 1805.02            |
| A_68_P21783958 | chr2:158440228-158440272                          | NM_009508:3757         | Slc32a1      | INSIDE                 | 0.746                                                        | 0.533                          | 1516.90            | 808.27             | 0.397                          | 1137.18            | 451.99             |
| A_68_P25957305 | chr8:74049435-74049479                            | NM_198095:11880        | Bst2         | DOWNSTREAM             | 0.745                                                        | 0.640                          | 894.81             | 572.44             | 0.477                          | 851.22             | 405.93             |
| A_68_P30588037 | chr16:20531290-20531334                           | NM_007889:14176        | Dvl3         | INSIDE                 | 0.745                                                        | 1.826                          | 3827.58            | 6990.44            | 1.360                          | 2865.64            | 3898.17            |
| A_68_P27289051 | chr10:80812913-80812957                           | NM_001163165:237       | Hmg20b       | INSIDE                 | 0.745                                                        | 0.528                          | 1367.59            | 722.49             | 0.393                          | 1080.30            | 425.00             |
| A_68_P28621834 | chr12:90498622-90498666                           | NM_172544:306811       | Nrxn3        | INSIDE                 | 0.745                                                        | 3.199                          | 393.77             | 1259.55            | 2.384                          | 393.09             | 937.22             |
| A_68_P25956547 | chr8:73895356-73895400                            | NM_029865:182          | Oce11        | INSIDE                 | 0.745                                                        | 0.695                          | 1196.11            | 830.72             | 0.518                          | 958.25             | 496.10             |
| A_68_P32218817 | chr19:59419763-59419807                           | NM_001033222:486       | Pdzd8        | INSIDE                 | 0.745                                                        | 0.707                          | 2121.45            | 1499.65            | 0.527                          | 1619.88            | 853.00             |
| A_68_P27833777 | chr11:58775607-58775651                           | NM_031172:-1654        | Trim17       | PROMOTER               | 0.745                                                        | 1.997                          | 1144.68            | 2285.94            | 1.488                          | 847.69             | 1261.26            |
| A_68_P32217660 | chr19:59241128-59241172                           | NM_009501:3369         | Vax1         | INSIDE                 | 0.745                                                        | 0.658                          | 1012.97            | 667.01             | 0.491                          | 906.79             | 444.97             |
| A_68_P30401336 | chr15:85374246-85374290                           | NM_001163634:34232     | Wnt7b        | INSIDE                 | 0.745                                                        | 2.100                          | 690.67             | 1450.41            | 1.565                          | 647.26             | 1012.84            |
| A_68_P26885413 | chr9:121671857-121671901                          | NM_001166644:2728      | Zfp651       | INSIDE                 | 0.745                                                        | 2.120                          | 927.84             | 1966.69            | 1.579                          | 767.15             | 1211.40            |
| A_68_P28939819 | chr13:34744472-34744516                           | NM_025831:56           | 130001406Rik | INSIDE                 | 0.744                                                        | 0.435                          | 1409.06            | 613.62             | 0.324                          | 1269.42            | 411.06             |
| A_68_P20936232 | chr11:192921750-192921794                         | NM_030060:-520         | Batf3        | PROMOTER               | 0.744                                                        | 0.643                          | 1837.44            | 1181.13            | 0.478                          | 1601.35            | 765.35             |
| A_68_P23262159 | chr4:123019941-123019985                          | NM_007558:84           | Bmp8a        | INSIDE                 | 0.744                                                        | 0.705                          | 1845.18            | 1300.66            | 0.524                          | 1518.93            | 796.23             |
| A_68_P26591858 | chr9:66068690-66068734                            | NM_010019:62680        | Dapk2        | INSIDE                 | 0.744                                                        | 3.005                          | 4345.16            | 13055.44           | 2.236                          | 3347.90            | 7485.03            |
| A_68_P24138653 | chr5:140448112-140448156                          | NM_175522:64238        | Elfn1        | INSIDE                 | 0.744                                                        | 2.249                          | 2270.52            | 5106.73            | 1.674                          | 1746.68            | 2923.46            |
| A_68_P25099052 | chr7:53682950-53683004                            | NM_001112739:31110     | Kenc1        | INSIDE                 | 0.744                                                        | 2.520                          | 609.40             | 1535.94            | 1.876                          | 465.96             | 874.18             |
| A_68_P23409061 | chr4:150288454-150288498                          | NM_020569:-4446        | Park7        | DIVERGENT_PROMOTER     | 0.744                                                        | 0.503                          | 1317.03            | 663.04             | 0.375                          | 1122.42            | 420.62             |
| A_68_P27565177 | chr11:5737772-5737817                             | NM_017401:225          | Polm         | INSIDE                 | 0.744                                                        | 0.699                          | 1513.09            | 1058.30            | 0.521                          | 1186.56            | 617.70             |
| A_68_P22317133 | chr3:88894786-88894830                            | NM_001083808:-855      | Rusc1        | PROMOTER               | 0.744                                                        | 0.630                          | 1839.01            | 1159.05            | 0.469                          | 1607.42            | 753.95             |
| A_68_P21137058 | chr2:35834687-35834731                            | NM_028921:436          | Till11       | INSIDE                 | 0.744                                                        | 0.317                          | 1912.53            | 606.12             | 0.236                          | 1624.80            | 383.27             |
| A_68_P21040932 | chr2:18616488-18616532                            | NM_001001334:-4138     | BC061194     | PROMOTER               | 0.743                                                        | 0.656                          | 1568.20            | 1028.56            | 0.488                          | 1255.34            | 612.01             |
| A_68_P28454004 | chr12:56962132-56962176                           | NM_001037756:24802     | Brms11       | INSIDE                 | 0.743                                                        | 3.004                          | 1076.31            | 3233.01            | 2.230                          | 847.73             | 1890.80            |
| A_68_P26813048 | chr9:108008754-108008798                          | NM_007567:83938        | Bsn          | INSIDE                 | 0.743                                                        | 2.107                          | 1412.61            | 2976.51            | 1.566                          | 1101.26            | 1724.08            |
| A_68_P31605182 | chr18:33098803-33098847                           | NM_009793:130          | Camk4        | INSIDE                 | 0.743                                                        | 0.683                          | 1968.68            | 1344.77            | 0.508                          | 1730.29            | 878.40             |
| A_68_P33015611 | chr1_random:49523-49567                           | NM_026866:135794       | Disp1        | INSIDE                 | 0.743                                                        | 3.353                          | 590.76             | 1980.80            | 2.492                          | 484.38             | 1207.01            |
| A_68_P30180492 | chr15:44258965-44259009                           | NM_175009:-670         | Eny2         | PROMOTER               | 0.743                                                        | 0.517                          | 1223.99            | 632.46             | 0.384                          | 1018.16            | 390.97             |
| A_68_P20455837 | chr1:95375021-95375065                            | NM_133808:343          | Hdlbp        | INSIDE                 | 0.743                                                        | 0.388                          | 2499.77            | 970.23             | 0.288                          | 2038.42            | 587.76             |
| A_68_P29071671 | chr13:58229883-58229927                           | NM_029872:13           | Hnrnpa0      | INSIDE                 | 0.743                                                        | 0.552                          | 1149.66            | 634.29             | 0.410                          | 1060.04            | 434.56             |
| A_68_P31863635 | chr18:80519494-80519538                           | NM_001190373:41477     | Keng2        | INSIDE                 | 0.743                                                        | 2.913                          | 368.20             | 1072.74            | 2.165                          | 331.57             | 717.89             |
| A_68_P20864306 | chr11:180459903-180459947                         | NM_001161665:669       | Kif26b       | INSIDE                 | 0.743                                                        | 0.606                          | 1363.58            | 825.89             | 0.450                          | 1029.62            | 463.58             |
| A_68_P25951934 | chr8:72976066-72976110                            | NM_001122830:24754     | Klhl26       | INSIDE                 | 0.743                                                        | 3.302                          | 501.01             | 1654.25            | 2.454                          | 518.10             | 1271.45            |
| A_68_P29977212 | chr15:3976767-3976811                             | NM_024188:361          | Oxct1        | INSIDE                 | 0.743                                                        | 0.655                          | 826.36             | 541.07             | 0.486                          | 744.84             | 362.34             |
| A_68_P24059430 | chr5:124573768-124573812                          | NM_011256:92637        | Pitpnm2      | INSIDE                 | 0.743                                                        | 2.267                          | 739.80             | 1676.94            | 1.684                          | 625.56             | 1053.61            |
| A_68_P22549107 | chr3:134492132-134492176                          | NM_021382:184          | Tacr3        | INSIDE                 | 0.743                                                        | 0.651                          | 813.01             | 529.14             | 0.484                          | 668.73             | 323.51             |
| A_68_P21936418 | chr3:9251625-9251669                              | NM_177660:1080         | Zbtb10       | INSIDE                 | 0.743                                                        | 0.524                          | 4449.27            | 2333.04            | 0.389                          | 3450.01            | 1343.30            |
| A_68_P21825959 | chr2:165622131-165622175                          | NM_027230:88036        | Zmynd8       | INSIDE                 | 0.743                                                        | 2.291                          | 11741.14           | 26900.75           | 1.703                          | 9261.99            | 15769.84           |
| A_68_P31661524 | chr18:43597803-43597847                           | ENSMUST00000121805:116 |              | INSIDE                 | 0.743                                                        | 0.615                          | 1079.61            | 664.34             | 0.457                          | 914.23             | 417.86             |

| ProbeName      | Target position of probe on CpG island microarray | TargetID                 | GeneSymbol    | CpG island Description | Ratio of relative methylation (TiO <sub>2</sub> -NP/Vehicle) | Sham group                     |                    |                    | TiO <sub>2</sub> -H group      |                    |                    |
|----------------|---------------------------------------------------|--------------------------|---------------|------------------------|--------------------------------------------------------------|--------------------------------|--------------------|--------------------|--------------------------------|--------------------|--------------------|
|                |                                                   |                          |               |                        |                                                              | Relative methylation (Cy5/Cy3) | Cy3 signal (Input) | Cy5 signal (MeDIP) | Relative methylation (Cy5/Cy3) | Cy3 signal (Input) | Cy5 signal (MeDIP) |
| A_68_P24047008 | chr5:122319680-122319724                          | NM_007804:178132         | Cux2          | INSIDE                 | 0.742                                                        | 2.362                          | 645.46             | 1524.79            | 1.753                          | 489.91             | 858.88             |
| A_68_P31097237 | chr17:24563905-24563949                           | NM_010023:299            | Eci1          | INSIDE                 | 0.742                                                        | 0.566                          | 1163.00            | 658.71             | 0.420                          | 956.23             | 401.93             |
| A_68_P31418978 | chr17:87152455-87152501                           | NM_010137:-725           | Epas1         | PROMOTER               | 0.742                                                        | 0.582                          | 2128.48            | 1238.06            | 0.431                          | 1658.53            | 715.49             |
| A_68_P23313223 | chr4:132194907-132194951                          | NM_210071:-32            | Eya3          | PROMOTER               | 0.742                                                        | 0.561                          | 1026.66            | 576.02             | 0.416                          | 961.09             | 399.93             |
| A_68_P28998902 | chr13:44998214-44998258                           | NM_001205043:171597      | Jarid2        | INSIDE                 | 0.742                                                        | 2.532                          | 1481.69            | 3751.16            | 1.877                          | 1224.38            | 2298.64            |
| A_68_P23513988 | chr5:18732289-18732333                            | NM_001170746:-553        | Magi2         | PROMOTER               | 0.742                                                        | 0.454                          | 1769.41            | 803.66             | 0.337                          | 1425.13            | 480.16             |
| A_68_P22218637 | chr3:68810132-68810176                            | NR_029529:-3539          | Mir15b        | PROMOTER               | 0.742                                                        | 0.359                          | 1820.11            | 652.92             | 0.266                          | 1449.84            | 385.87             |
| A_68_P28055697 | chr11:98189678-98189722                           | NM_010895:1259           | Neurod2       | INSIDE                 | 0.742                                                        | 0.683                          | 4121.95            | 2814.81            | 0.507                          | 3439.85            | 1742.75            |
| A_68_P26706397 | chr9:87624704-87624748                            | NM_023814:1369           | Tbx18         | INSIDE                 | 0.742                                                        | 0.647                          | 2561.53            | 1656.42            | 0.480                          | 2249.90            | 1079.08            |
| A_68_P22336424 | chr3:93251272-93251316                            | NM_001163098:5043        | Tehh          | INSIDE                 | 0.742                                                        | 0.638                          | 1957.48            | 1249.51            | 0.474                          | 1487.27            | 704.32             |
| A_68_P22818476 | chr4:32024578-32024622                            | AK142691:4357            |               | DOWNSTREAM             | 0.742                                                        | 0.623                          | 903.10             | 562.88             | 0.463                          | 716.22             | 331.41             |
| A_68_P26057105 | chr8:93657970-93658014                            | NM_010241:1403           | Aktip         | INSIDE                 | 0.741                                                        | 0.613                          | 1315.24            | 805.92             | 0.454                          | 1058.45            | 480.67             |
| A_68_P20998751 | chr2:10001887-10001931                            | NM_001112738:229         | Atp5c1        | INSIDE                 | 0.741                                                        | 0.498                          | 1896.87            | 944.31             | 0.369                          | 1415.27            | 522.23             |
| A_68_P32567808 | chrX:99447383-99447427                            | NM_007709:-296           | Cited1        | PROMOTER               | 0.741                                                        | 2.379                          | 1949.08            | 4636.43            | 1.763                          | 1218.88            | 2148.76            |
| A_68_P26344762 | chr9:20757074-20757118                            | NM_001199433:-29         | Dnmt1         | PROMOTER               | 0.741                                                        | 0.450                          | 1820.89            | 818.95             | 0.333                          | 1502.97            | 500.79             |
| A_68_P20969133 | chr2:4524944-4524988                              | NM_001177844:44167       | Frm4a         | INSIDE                 | 0.741                                                        | 2.056                          | 968.19             | 1990.36            | 1.522                          | 745.27             | 1134.57            |
| A_68_P27973305 | chr11:83567284-83567328                           | NM_145432:168            | Heatr6        | INSIDE                 | 0.741                                                        | 0.710                          | 1341.40            | 952.54             | 0.526                          | 1100.61            | 579.17             |
| A_68_P31672404 | chr18:45719853-45719897                           | NM_080465:67             | Kenn2         | INSIDE                 | 0.741                                                        | 0.520                          | 1294.22            | 673.22             | 0.386                          | 1100.13            | 424.20             |
| A_68_P30251032 | chr15:58765375-58765419                           | NM_023172:32             | Ndutf9        | INSIDE                 | 0.741                                                        | 2.234                          | 715.81             | 1598.87            | 1.656                          | 675.94             | 1119.14            |
| A_68_P29051304 | chr13:54867489-54867533                           | NM_033610:291            | Sncb          | INSIDE                 | 0.741                                                        | 0.553                          | 2006.16            | 1110.27            | 0.410                          | 1489.44            | 610.62             |
| A_68_P31055435 | chr17:13109226-13109270                           | NM_013686:-82            | Tcp1          | DIVERGENT_PROMOTER     | 0.741                                                        | 0.592                          | 1368.37            | 809.96             | 0.438                          | 996.98             | 437.15             |
| A_68_P30094306 | chr15:27677312-27677364                           | NM_001081302:278265      | Trio          | INSIDE                 | 0.741                                                        | 4.333                          | 1320.19            | 5720.37            | 3.211                          | 1064.20            | 3417.62            |
| A_68_P23937432 | chr5:102311610-102311654                          | NM_172882:187308         | Wdfy3         | INSIDE                 | 0.741                                                        | 2.294                          | 1048.54            | 2405.02            | 1.699                          | 859.83             | 1460.45            |
| A_68_P23167117 | chr4:103292545-103292589                          | ENSMUST00000106827:297   |               | INSIDE                 | 0.741                                                        | 2.289                          | 548.36             | 1254.94            | 1.695                          | 503.90             | 853.98             |
| A_68_P30394509 | chr15:84237243-84237293                           | NM_001163145:40259       | 1810041L15Rik | INSIDE                 | 0.740                                                        | 2.659                          | 6179.66            | 16431.01           | 1.968                          | 3919.49            | 7715.36            |
| A_68_P26016334 | chr8:86264880-86264924                            | NM_001163029:308         | Cd97          | INSIDE                 | 0.740                                                        | 0.589                          | 1079.89            | 636.09             | 0.436                          | 909.81             | 396.58             |
| A_68_P27186921 | chr10:62064974-62065018                           | NM_019553:50             | Ddx21         | INSIDE                 | 0.740                                                        | 0.619                          | 907.52             | 561.93             | 0.458                          | 723.64             | 331.63             |
| A_68_P21177699 | chr2:44412715-44412759                            | NM_172662:304406         | Gtdc1         | DOWNSTREAM             | 0.740                                                        | 0.553                          | 1450.86            | 802.51             | 0.410                          | 1194.08            | 489.05             |
| A_68_P26809757 | chr9:107490272-107490316                          | NM_025903:246            | Ifrd2         | INSIDE                 | 0.740                                                        | 0.613                          | 1771.52            | 1085.73            | 0.454                          | 1486.18            | 674.03             |
| A_68_P24054545 | chr5:123678394-123678438                          | NM_026000:218            | Psmc9         | INSIDE                 | 0.740                                                        | 0.486                          | 2118.47            | 1029.52            | 0.360                          | 1661.37            | 597.57             |
| A_68_P31622955 | chr18:36441203-36441247                           | NM_008989:409            | Pura          | INSIDE                 | 0.740                                                        | 0.708                          | 2664.09            | 1885.18            | 0.524                          | 2195.46            | 1149.44            |
| A_68_P31097160 | chr17:24551864-24551908                           | NM_001080127:267         | Rnps1         | INSIDE                 | 0.740                                                        | 0.603                          | 1159.01            | 698.68             | 0.446                          | 929.97             | 414.68             |
| A_68_P24973143 | chr7:13404105-13404149                            | NM_026046:83             | Zfp329        | INSIDE                 | 0.740                                                        | 0.577                          | 1442.37            | 832.68             | 0.427                          | 1140.39            | 487.21             |
| A_68_P20858943 | chr1:179253140-179253187                          |                          |               | Unknown                | 0.740                                                        | 3.127                          | 318.70             | 996.42             | 2.312                          | 277.21             | 641.02             |
| A_68_P22832216 | chr4:34663543-34663589                            | NM_027041:13889          | 1700003M02Rik | INSIDE                 | 0.739                                                        | 3.398                          | 192.55             | 654.32             | 2.511                          | 203.16             | 510.22             |
| A_68_P26888896 | chr9:122260961-122261005                          | NM_026179:249            | Abhd5         | INSIDE                 | 0.739                                                        | 0.456                          | 1488.24            | 679.33             | 0.338                          | 1372.71            | 463.35             |
| A_68_P27765616 | chr11:45869574-45869618                           | NM_009616:108            | Adam19        | INSIDE                 | 0.739                                                        | 0.727                          | 2472.74            | 1798.80            | 0.537                          | 2026.60            | 1089.05            |
| A_68_P26216375 | chr8:122364400-122364444                          | NM_028071:57             | Cotl1         | INSIDE                 | 0.739                                                        | 0.408                          | 1493.83            | 609.12             | 0.301                          | 1152.02            | 346.98             |
| A_68_P26137128 | chr8:108503069-108503114                          | NM_027960:228            | Dpep3         | INSIDE                 | 0.739                                                        | 5.178                          | 1554.18            | 8047.69            | 3.824                          | 1140.70            | 4362.13            |
| A_68_P31424360 | chr17:88039882-88039941                           | NM_008532:4593           | Epcam         | INSIDE                 | 0.739                                                        | 2.389                          | 525.69             | 1255.78            | 1.765                          | 428.88             | 757.03             |
| A_68_P28575794 | chr12:81564131-81564176                           | NM_133798:72             | Exd2          | INSIDE                 | 0.739                                                        | 0.672                          | 1316.22            | 883.89             | 0.497                          | 1057.30            | 525.02             |
| A_68_P26138083 | chr8:108686810-108686868                          | NM_133792:12540          | Pla2g15       | INSIDE                 | 0.739                                                        | 2.084                          | 918.97             | 1915.36            | 1.539                          | 760.89             | 1171.37            |
| A_68_P21776096 | chr2:157104650-157104694                          | NM_019642:-161           | Rpn2          | PROMOTER               | 0.739                                                        | 0.567                          | 979.45             | 555.53             | 0.419                          | 882.95             | 369.88             |
| A_68_P29619288 | chr14:56300374-56300418                           | NM_145705:258            | Timf2         | INSIDE                 | 0.739                                                        | 0.501                          | 1407.61            | 705.31             | 0.370                          | 1161.83            | 429.98             |
| A_68_P30255516 | chr15:59480386-59480430                           | NM_144549:200            | Trib1         | INSIDE                 | 0.739                                                        | 0.619                          | 948.94             | 587.33             | 0.458                          | 765.05             | 350.13             |
| A_68_P21365112 | chr2:78708612-78708656                            | NM_009454:-569           | Ube2c3        | PROMOTER               | 0.739                                                        | 0.439                          | 1259.62            | 552.74             | 0.324                          | 1016.54            | 329.72             |
| A_68_P23227081 | chr4:115652001-115652045                          | ENSMUST00000125761:38258 |               | INSIDE                 | 0.739                                                        | 0.484                          | 1630.75            | 788.77             | 0.358                          | 1269.13            | 453.86             |
| A_68_P31791927 | chr18:67608929-67608973                           | NM_027130:-160           | Afg3l2        | PROMOTER               | 0.738                                                        | 2.584                          | 13481.67           | 34840.73           | 1.908                          | 9870.08            | 18827.93           |
| A_68_P26166332 | chr8:113580916-113580960                          | NM_028274:700            | Exosc6        | INSIDE                 | 0.738                                                        | 0.641                          | 1639.80            | 1051.41            | 0.473                          | 1384.10            | 655.34             |
| A_68_P26693191 | chr9:85220481-85220525                            | NM_001160378:229         | Fam46a        | INSIDE                 | 0.738                                                        | 0.636                          | 3853.51            | 2451.08            | 0.469                          | 3093.79            | 1452.25            |
| A_68_P21428050 | chr2:92210966-92211010                            | NM_001166633:205         | Gylt1b        | INSIDE                 | 0.738                                                        | 0.448                          | 1441.07            | 645.51             | 0.330                          | 1136.68            | 375.60             |

| ProbeName      | Target position of probe on CpG island microarray | TargetID               | GeneSymbol    | CpG island Description | Ratio of relative methylation (TiO <sub>2</sub> -NP/Vehicle) | Sham group                     |                    |                    | TiO <sub>2</sub> -H group      |                    |                    |
|----------------|---------------------------------------------------|------------------------|---------------|------------------------|--------------------------------------------------------------|--------------------------------|--------------------|--------------------|--------------------------------|--------------------|--------------------|
|                |                                                   |                        |               |                        |                                                              | Relative methylation (Cy5/Cy3) | Cy3 signal (Input) | Cy5 signal (MeDIP) | Relative methylation (Cy5/Cy3) | Cy3 signal (Input) | Cy5 signal (MeDIP) |
| A_68_P28099141 | chr11:105882018-105882062                         | NM_001037712:12524     | Kenh6         | INSIDE                 | 0.738                                                        | 0.508                          | 1155.24            | 586.36             | 0.374                          | 947.35             | 354.62             |
| A_68_P23429536 | chr4:153544927-153544971                          | NM_001162977:127       | Megf6         | INSIDE                 | 0.738                                                        | 0.568                          | 1305.64            | 741.69             | 0.419                          | 968.78             | 405.92             |
| A_68_P31462885 | chr18:4375737-4375781                             | NM_026157:169          | Mtpap         | INSIDE                 | 0.738                                                        | 0.465                          | 1320.44            | 614.40             | 0.343                          | 957.27             | 328.76             |
| A_68_P32134813 | chr19:44910513-44910557                           | NM_011037:78651        | Pax2          | INSIDE                 | 0.738                                                        | 0.546                          | 2166.19            | 1182.22            | 0.403                          | 1551.03            | 625.13             |
| A_68_P21871011 | chr2:173485139-173485183                          | NR_027957:-120         | Ppp4r1l-ps    | DIVERGENT_PROMOTER     | 0.738                                                        | 0.456                          | 1292.56            | 589.14             | 0.336                          | 1010.01            | 339.76             |
| A_68_P25090919 | chr7:52308886-52308930                            | NM_175022:-657         | Prr12         | PROMOTER               | 0.738                                                        | 0.712                          | 1500.33            | 1068.45            | 0.525                          | 1365.97            | 717.80             |
| A_68_P24158012 | chr5:144493603-144493647                          | NM_029749:-475         | Usp42         | PROMOTER               | 0.738                                                        | 0.486                          | 1476.50            | 717.45             | 0.359                          | 1173.47            | 420.71             |
| A_68_P24022912 | chr5:118292434-118292478                          | ENSMUST00000111935:262 |               | INSIDE                 | 0.738                                                        | 0.352                          | 1606.41            | 564.68             | 0.259                          | 1220.54            | 316.54             |
| A_68_P27282383 | chr10:79775753-79775797                           | NM_011789:11210        | Apc2          | INSIDE                 | 0.737                                                        | 2.678                          | 259.71             | 695.46             | 1.974                          | 287.81             | 568.09             |
| A_68_P25429180 | chr7:120350610-120350654                          | NM_007489:-346         | Arntl         | PROMOTER               | 0.737                                                        | 0.496                          | 1556.30            | 771.77             | 0.365                          | 1030.62            | 376.43             |
| A_68_P28743347 | chr12:112556990-112557038                         | NM_183016:58915        | Cdc42bbp      | INSIDE                 | 0.737                                                        | 2.555                          | 441.16             | 1127.10            | 1.884                          | 376.49             | 709.36             |
| A_68_P23317811 | chr4:133036049-133036093                          | NM_175307:23           | Fam46b        | INSIDE                 | 0.737                                                        | 0.407                          | 2133.25            | 868.72             | 0.300                          | 1726.30            | 517.90             |
| A_68_P24589802 | chr6:82723996-82724040                            | NM_013820:430          | Hk2           | INSIDE                 | 0.737                                                        | 0.559                          | 1600.55            | 894.17             | 0.412                          | 1221.32            | 503.06             |
| A_68_P25196741 | chr7:75095612-75095656                            | NM_010513:-1508        | Igf1r         | PROMOTER               | 0.737                                                        | 0.537                          | 1439.37            | 773.28             | 0.396                          | 1137.59            | 450.35             |
| A_68_P24990857 | chr7:19589831-19589875                            | NM_178757:439          | Irf2bp1       | INSIDE                 | 0.737                                                        | 0.594                          | 2734.43            | 1623.11            | 0.437                          | 2033.12            | 889.32             |
| A_68_P22165657 | chr3:57651863-57651907                            | NM_019410:-205         | Pfn2          | PROMOTER               | 0.737                                                        | 0.700                          | 1700.02            | 1189.86            | 0.516                          | 1189.86            | 814.11             |
| A_68_P30346541 | chr15:76002795-76002839                           | NM_201394:23324        | Plec          | INSIDE                 | 0.737                                                        | 2.366                          | 736.04             | 1741.78            | 1.745                          | 642.26             | 1120.79            |
| A_68_P28739965 | chr12:111975801-111975845                         | NM_027149:-336         | Wdr20a        | PROMOTER               | 0.737                                                        | 0.496                          | 1415.72            | 701.77             | 0.365                          | 1129.44            | 412.52             |
| A_68_P24951589 | chr7:4969379-4969423                              | NM_025324:2291         | Zfp524        | INSIDE                 | 0.737                                                        | 1.873                          | 2204.66            | 4128.25            | 1.380                          | 1639.57            | 2263.03            |
| A_68_P22202957 | chr3:65778426-65778470                            | AK133062:4613          |               | DOWNSTREAM             | 0.737                                                        | 0.612                          | 1689.50            | 1034.26            | 0.451                          | 1335.44            | 602.26             |
| A_68_P20641033 | chr1:137584481-137584525                          | ENSMUST00000112103:180 |               | INSIDE                 | 0.737                                                        | 0.648                          | 1065.98            | 691.20             | 0.478                          | 914.77             | 437.39             |
| A_68_P23442481 | chr4:155484106-155484150                          | NM_145557:22           | 9430015G10Rik | INSIDE                 | 0.736                                                        | 0.657                          | 1798.94            | 1182.66            | 0.484                          | 1648.04            | 797.92             |
| A_68_P30931283 | chr16:85803597-85803643                           | NM_009621:-260         | Adams1        | PROMOTER               | 0.736                                                        | 0.415                          | 1574.19            | 652.51             | 0.305                          | 1255.45            | 382.98             |
| A_68_P24605770 | chr6:85537797-85537841                            | NM_145223:294          | Alms1         | INSIDE                 | 0.736                                                        | 0.584                          | 1180.21            | 688.87             | 0.430                          | 915.29             | 393.38             |
| A_68_P23103737 | chr4:91038861-91038905                            | NM_010486:-136         | Elavl2        | PROMOTER               | 0.736                                                        | 0.705                          | 1320.87            | 931.77             | 0.519                          | 1234.22            | 640.71             |
| A_68_P25828112 | chr8:46129668-46129713                            | NM_001081286:94129     | Fat1          | INSIDE                 | 0.736                                                        | 2.199                          | 1693.45            | 3723.43            | 1.617                          | 1211.44            | 1959.17            |
| A_68_P27924569 | chr11:74980234-74980278                           | NM_001098203:1398      | Hic1          | INSIDE                 | 0.736                                                        | 0.512                          | 1334.77            | 683.39             | 0.377                          | 1210.30            | 455.82             |
| A_68_P23355139 | chr4:139521507-139521551                          | NM_173427:2413         | Klhdc7a       | INSIDE                 | 0.736                                                        | 2.704                          | 1205.03            | 3258.92            | 1.990                          | 957.09             | 1904.15            |
| A_68_P21122758 | chr2:33496074-33496118                            | NM_010725:-65          | Lmx1b         | PROMOTER               | 0.736                                                        | 0.606                          | 1331.28            | 806.58             | 0.446                          | 1035.90            | 461.67             |
| A_68_P23842571 | chr5:82223744-82223788                            | NM_198702:773149       | Lphn3         | INSIDE                 | 0.736                                                        | 2.809                          | 2070.38            | 5814.88            | 2.066                          | 1458.92            | 3014.37            |
| A_68_P28177561 | chr11:119251986-119252030                         | NR_035453:223          | Mir1932       | DOWNSTREAM             | 0.736                                                        | 0.637                          | 881.70             | 561.33             | 0.469                          | 757.45             | 354.94             |
| A_68_P27449072 | chr10:110910120-110910164                         | NM_015781:-105         | Nap1l1        | PROMOTER               | 0.736                                                        | 0.428                          | 1530.79            | 654.53             | 0.315                          | 1218.52            | 383.70             |
| A_68_P22920588 | chr4:53024879-53024923                            | NM_025623:105          | Nipsnap3b     | INSIDE                 | 0.736                                                        | 0.650                          | 1103.11            | 717.03             | 0.479                          | 797.21             | 381.64             |
| A_68_P21101092 | chr2:29917364-29917408                            | NM_023871:-129         | Set           | PROMOTER               | 0.736                                                        | 0.529                          | 2496.37            | 1320.15            | 0.389                          | 1917.42            | 746.57             |
| A_68_P23819149 | chr5:77403640-77403684                            | NM_025691:-63          | Srp72         | PROMOTER               | 0.736                                                        | 0.527                          | 1566.95            | 826.32             | 0.388                          | 1287.43            | 499.44             |
| A_68_P22869409 | chr4:43013406-43013450                            | NM_009503:-49          | Vcp           | PROMOTER               | 0.736                                                        | 0.633                          | 2142.68            | 1356.37            | 0.466                          | 1602.18            | 746.04             |
| A_68_P28712493 | chr12:107248661-107248705                         | NM_001029843:210       | Vrk1          | INSIDE                 | 0.736                                                        | 0.729                          | 1701.18            | 1240.16            | 0.536                          | 1260.60            | 676.07             |
| A_68_P32326562 | chrX:35534336-35534380                            | NM_001079513:-8611     | Zbtb33        | PROMOTER               | 0.736                                                        | 2.048                          | 2849.40            | 5834.73            | 1.507                          | 1293.01            | 1948.22            |
| A_68_P24973142 | chr7:13403941-13403985                            | NM_026046:247          | Zfp329        | INSIDE                 | 0.736                                                        | 0.660                          | 2398.56            | 1583.41            | 0.486                          | 1930.04            | 938.28             |
| A_68_P20141347 | chr1:34987195-34987239                            |                        |               | Unknown                | 0.736                                                        | 2.619                          | 1381.48            | 3617.66            | 1.926                          | 1228.56            | 2366.42            |
| A_68_P21037980 | chr2:17969325-17969369                            | NM_028317:730          | 2810030E01Rik | INSIDE                 | 0.735                                                        | 0.702                          | 1521.11            | 1068.52            | 0.517                          | 1323.68            | 683.79             |
| A_68_P33007148 | chr9_random:50071-50115                           | NR_015516:-3316        | 4930526I15Rik | PROMOTER               | 0.735                                                        | 2.607                          | 653.18             | 1702.71            | 1.917                          | 553.65             | 1061.22            |
| A_68_P24330600 | chr6:30125802-30125846                            | NR_038124:-798         | BB283400      | DIVERGENT_PROMOTER     | 0.735                                                        | 0.637                          | 1000.05            | 637.37             | 0.468                          | 815.40             | 381.80             |
| A_68_P25047600 | chr7:35903087-35903131                            | NM_007678:-1203        | Cebpa         | PROMOTER               | 0.735                                                        | 0.600                          | 1750.07            | 1050.28            | 0.441                          | 1435.10            | 633.00             |
| A_68_P23343151 | chr4:137549520-137549564                          | NM_172703:158          | Eif4g3        | INSIDE                 | 0.735                                                        | 0.500                          | 2430.91            | 1214.73            | 0.367                          | 2002.04            | 735.73             |
| A_68_P31099381 | chr17:24889759-24889803                           | NM_001012402:-167      | Hs3st6        | PROMOTER               | 0.735                                                        | 0.561                          | 1429.04            | 802.30             | 0.412                          | 1135.73            | 468.40             |
| A_68_P26416478 | chr9:34296474-34296518                            | NM_001190913:181       | Kirrel3       | INSIDE                 | 0.735                                                        | 0.671                          | 992.40             | 666.19             | 0.493                          | 896.32             | 442.24             |
| A_68_P23260019 | chr4:122638179-122638223                          | NM_029662:231          | Mfsd2a        | INSIDE                 | 0.735                                                        | 0.631                          | 1691.29            | 1067.63            | 0.464                          | 1483.90            | 688.89             |
| A_68_P27710217 | chr11:35860615-35860667                           | NM_011856:897105       | Odz2          | INSIDE                 | 0.735                                                        | 2.196                          | 634.02             | 1392.52            | 1.615                          | 520.40             | 840.34             |
| A_68_P31936611 | chr19:6984134-6984178                             | NM_012021:-21          | Prdx5         | DIVERGENT_PROMOTER     | 0.735                                                        | 0.407                          | 1415.73            | 575.89             | 0.299                          | 1215.48            | 363.50             |
| A_68_P30861546 | chr16:72663403-72663447                           | NM_019413:31           | Robo1         | INSIDE                 | 0.735                                                        | 0.455                          | 1542.64            | 701.58             | 0.334                          | 1207.14            | 403.63             |

| ProbeName      | Target position of probe on CpG island microarray | TargetID                | GeneSymbol | CpG island Description | Ratio of relative methylation (TiO <sub>2</sub> -NP/Vehicle) | Sham group                     |                    |                    | TiO <sub>2</sub> -H group      |                    |                    |
|----------------|---------------------------------------------------|-------------------------|------------|------------------------|--------------------------------------------------------------|--------------------------------|--------------------|--------------------|--------------------------------|--------------------|--------------------|
|                |                                                   |                         |            |                        |                                                              | Relative methylation (Cy5/Cy3) | Cy3 signal (Input) | Cy5 signal (MeDIP) | Relative methylation (Cy5/Cy3) | Cy3 signal (Input) | Cy5 signal (MeDIP) |
| A_68_P21776097 | chr2:157104828-157104872                          | NM_019642:17            | Rpn2       | INSIDE                 | 0.735                                                        | 0.492                          | 2970.10            | 1462.75            | 0.362                          | 2516.80            | 910.64             |
| A_68_P30550102 | chr16:11983916-11983960                           | NM_001174086:-267       | Shisa9     | PROMOTER               | 0.735                                                        | 0.552                          | 1039.13            | 573.25             | 0.405                          | 786.39             | 318.80             |
| A_68_P20456738 | chr1:95531890-95531934                            | NM_021537:392           | Stk25      | INSIDE                 | 0.735                                                        | 0.435                          | 2618.17            | 1139.22            | 0.320                          | 2044.68            | 654.10             |
| A_68_P27287714 | chr10:80611346-80611390                           | NM_010731:12353         | Zbtb7a     | INSIDE                 | 0.735                                                        | 3.043                          | 1863.48            | 5670.82            | 2.236                          | 1281.71            | 2865.95            |
| A_68_P27902562 | chr11:70577949-70577993                           | NM_177565:22            | Zfp3       | INSIDE                 | 0.735                                                        | 0.593                          | 1284.56            | 761.90             | 0.436                          | 1000.50            | 436.43             |
| A_68_P24540585 | chr6:72184350-72184394                            | NM_153778:1199          | Atoh8      | INSIDE                 | 0.734                                                        | 0.629                          | 1954.05            | 1228.88            | 0.462                          | 1538.94            | 710.43             |
| A_68_P30082170 | chr15:25552222-25552266                           | NM_019472:-60           | Myo10      | PROMOTER               | 0.734                                                        | 2.392                          | 10089.63           | 24137.04           | 1.756                          | 6288.85            | 11044.29           |
| A_68_P22149842 | chr3:54598425-54598471                            | NM_019483:38945         | Smad9      | INSIDE                 | 0.734                                                        | 2.264                          | 538.91             | 1220.11            | 1.661                          | 459.85             | 763.72             |
| A_68_P30510294 | chr16:4474965-4475009                             | NM_175347:48067         | Srl        | DOWNSTREAM             | 0.734                                                        | 0.450                          | 1173.45            | 527.48             | 0.330                          | 968.41             | 319.38             |
| A_68_P21890545 | chr2:178141876-178141920                          | NM_177191:465           | Sycp2      | INSIDE                 | 0.734                                                        | 2.049                          | 2217.97            | 4544.80            | 1.504                          | 1689.33            | 2541.23            |
| A_68_P28431150 | chr12:52791936-52791980                           | NM_021710:6             | Ap4s1      | INSIDE                 | 0.733                                                        | 0.735                          | 2875.79            | 2113.78            | 0.539                          | 2351.11            | 1267.11            |
| A_68_P30725227 | chr16:45159318-45159362                           | NM_026402:399           | Atg3       | INSIDE                 | 0.733                                                        | 0.509                          | 1447.87            | 737.09             | 0.373                          | 1192.94            | 445.24             |
| A_68_P21603778 | chr2:125450808-125450852                          | NM_001081091:19         | Cep152     | INSIDE                 | 0.733                                                        | 0.715                          | 6199.84            | 4434.33            | 0.524                          | 4557.33            | 2390.20            |
| A_68_P31113352 | chr17:27083607-27083651                           | NM_026948:-7205         | Cuta       | PROMOTER               | 0.733                                                        | 0.648                          | 996.41             | 645.42             | 0.475                          | 791.96             | 375.99             |
| A_68_P24743885 | chr6:110595746-110595790                          | NM_177328:177           | Grm7       | INSIDE                 | 0.733                                                        | 0.523                          | 1156.01            | 604.95             | 0.384                          | 940.53             | 360.81             |
| A_68_P27880944 | chr11:66907962-66908006                           | NM_001099635:16183      | Myh3       | INSIDE                 | 0.733                                                        | 2.703                          | 497.53             | 1344.86            | 1.982                          | 478.86             | 948.88             |
| A_68_P23575371 | chr5:31210102-31210146                            | NM_001134692:-29        | Ost4       | PROMOTER               | 0.733                                                        | 0.480                          | 1213.46            | 582.11             | 0.351                          | 934.67             | 328.52             |
| A_68_P25365848 | chr7:107270096-107270140                          | NM_133692:-108          | Pold3      | PROMOTER               | 0.733                                                        | 0.680                          | 1283.68            | 872.82             | 0.499                          | 1181.80            | 589.28             |
| A_68_P26569721 | chr9:62130111-62130155                            | NM_025721:-146          | Spesp1     | PROMOTER               | 0.733                                                        | 2.215                          | 702.65             | 1556.68            | 1.624                          | 608.04             | 987.23             |
| A_68_P23330838 | chr4:135411699-13541743                           | NM_001080387:-286       | Srsf10     | PROMOTER               | 0.733                                                        | 0.690                          | 1178.39            | 812.78             | 0.506                          | 884.46             | 447.16             |
| A_68_P21492632 | chr2:104968263-104968307                          | NM_144783:1599          | Wt1        | INSIDE                 | 0.733                                                        | 0.507                          | 1516.18            | 768.13             | 0.371                          | 1238.05            | 459.83             |
| A_68_P32565628 | chrX:98989774-98989818                            | ENSMUST00000151231:-198 |            | DIVERGENT_PROMOTER     | 0.733                                                        | 4.558                          | 196.37             | 894.99             | 3.341                          | 144.54             | 482.96             |
| A_68_P24104843 | chr5:133018201-133018245                          | NM_177047:-9            | Aut2       | PROMOTER               | 0.732                                                        | 0.538                          | 1584.04            | 852.42             | 0.394                          | 1163.25            | 458.33             |
| A_68_P28356776 | chr12:36883470-36883514                           | NM_025840:-80           | Bzw2       | DIVERGENT_PROMOTER     | 0.732                                                        | 0.710                          | 3297.14            | 2340.35            | 0.520                          | 2628.47            | 1365.87            |
| A_68_P31423368 | chr17:87845364-87845408                           | NM_007589:889           | Calm2      | INSIDE                 | 0.732                                                        | 2.042                          | 27563.02           | 56296.76           | 1.495                          | 21612.40           | 32309.69           |
| A_68_P27446114 | chr10:110357360-110357404                         | NM_007792:151           | Csrp2      | INSIDE                 | 0.732                                                        | 0.521                          | 2924.13            | 1524.33            | 0.381                          | 2285.41            | 871.54             |
| A_68_P33007793 | chr4_random:128741-128785                         | NM_001033326:18961      | Dhrsx      | INSIDE                 | 0.732                                                        | 1.925                          | 1720.51            | 3312.23            | 1.409                          | 1257.04            | 1770.88            |
| A_68_P25958569 | chr8:74249306-74249350                            | NM_028715:252           | Fcho1      | INSIDE                 | 0.732                                                        | 0.479                          | 2105.72            | 1009.66            | 0.351                          | 1609.95            | 565.35             |
| A_68_P24444428 | chr6:51419499-51419543                            | NM_016806:373           | Hnrpa2b1   | INSIDE                 | 0.732                                                        | 0.524                          | 1324.53            | 694.54             | 0.384                          | 1055.90            | 405.42             |
| A_68_P28748381 | chr12:113412125-113412169                         | NM_001097621:27728      | Kif26a     | INSIDE                 | 0.732                                                        | 2.097                          | 822.58             | 1725.27            | 1.535                          | 702.55             | 1078.25            |
| A_68_P25266320 | chr7:87515606-87515650                            | NM_172903:633           | Man2a2     | INSIDE                 | 0.732                                                        | 0.601                          | 1692.38            | 1017.45            | 0.440                          | 1473.48            | 648.23             |
| A_68_P27855152 | chr11:62478459-62478503                           | NM_175002:16317         | Mmg2t      | INSIDE                 | 0.732                                                        | 2.476                          | 1230.22            | 3045.92            | 1.813                          | 897.55             | 1627.64            |
| A_68_P32143072 | chr19:46379792-46379836                           | NM_019408:-370          | Nfkb2      | PROMOTER               | 0.732                                                        | 0.432                          | 1338.96            | 579.09             | 0.317                          | 1083.40            | 342.99             |
| A_68_P31052339 | chr17:12700068-12700112                           | NM_011395:480           | Sle22a3    | INSIDE                 | 0.732                                                        | 0.657                          | 1867.82            | 1226.87            | 0.481                          | 1422.62            | 683.59             |
| A_68_P23332900 | chr4:135804202-135804246                          | NM_011542:353           | Tcea3      | INSIDE                 | 0.732                                                        | 0.469                          | 1229.78            | 576.18             | 0.343                          | 1088.06            | 372.93             |
| A_68_P25033085 | chr7:31514372-31514419                            | NM_027215:158           | Tmem147    | INSIDE                 | 0.732                                                        | 2.442                          | 683.31             | 1668.51            | 1.788                          | 667.08             | 1192.76            |
| A_68_P29437676 | A_68_P29437676                                    |                         |            | Unknown                | 0.732                                                        | 4.393                          | 256.18             | 1125.31            | 3.215                          | 628.33             | 2020.29            |
| A_68_P23878952 | chr5:90113527-90113571                            | NM_001081401:198811     | Adams3     | INSIDE                 | 0.731                                                        | 2.426                          | 454.01             | 1101.33            | 1.773                          | 466.87             | 827.92             |
| A_68_P30404626 | chr15:85864596-85864640                           | NM_009886:-411          | Celsr1     | PROMOTER               | 0.731                                                        | 0.464                          | 1788.15            | 829.46             | 0.339                          | 1499.85            | 508.85             |
| A_68_P28745341 | chr12:112908900-112908944                         | NM_021273:1627          | Ckb        | INSIDE                 | 0.731                                                        | 0.603                          | 1086.49            | 654.70             | 0.440                          | 893.41             | 393.32             |
| A_68_P22152358 | chr3:55046521-55046565                            | NM_001111053:95         | Delk1      | INSIDE                 | 0.731                                                        | 0.561                          | 1171.73            | 657.68             | 0.410                          | 1028.00            | 421.62             |
| A_68_P27690051 | chr11:32543056-32543100                           | NM_134015:204           | Fbxw11     | INSIDE                 | 0.731                                                        | 0.659                          | 1113.17            | 733.64             | 0.482                          | 918.93             | 442.67             |
| A_68_P25565906 | chr7:144629538-144629582                          | NR_033611:204           | Gm12669    | INSIDE                 | 0.731                                                        | 0.591                          | 1748.37            | 1033.55            | 0.432                          | 1510.83            | 652.90             |
| A_68_P28577466 | chr12:81858386-81858430                           | NM_001008423:3294       | Gm1568     | INSIDE                 | 0.731                                                        | 2.007                          | 1131.11            | 2269.65            | 1.466                          | 861.16             | 1262.70            |
| A_68_P20897049 | chr1:186542249-186542293                          | NM_008250:14102         | Hlx        | DOWNSTREAM             | 0.731                                                        | 0.518                          | 1286.64            | 666.73             | 0.379                          | 1073.75            | 406.51             |
| A_68_P23752951 | chr5:65195497-65195541                            | NM_008453:757           | Klf3       | INSIDE                 | 0.731                                                        | 0.606                          | 1203.30            | 728.66             | 0.443                          | 960.55             | 425.39             |
| A_68_P26823921 | chr9:110379166-110379210                          | NM_177771:10            | Kihl18     | INSIDE                 | 0.731                                                        | 0.462                          | 1777.26            | 821.49             | 0.338                          | 1350.38            | 456.43             |
| A_68_P23567513 | chr5:29761841-29761885                            | NM_001033457:656        | Nom1       | INSIDE                 | 0.731                                                        | 0.603                          | 1385.36            | 834.81             | 0.441                          | 1135.70            | 500.38             |
| A_68_P28301678 | chr12:27099581-27099625                           | NM_001081977:519        | Rnf144a    | INSIDE                 | 0.731                                                        | 0.364                          | 3633.86            | 1323.13            | 0.266                          | 2693.05            | 717.23             |
| A_68_P31117592 | chr17:27772360-27772404                           | NM_025963:-195          | Rps10      | PROMOTER               | 0.731                                                        | 2.097                          | 1745.21            | 3659.61            | 1.532                          | 1565.47            | 2398.82            |
| A_68_P21428682 | chr2:92299796-92299840                            | NM_211358:133           | Sle35c1    | INSIDE                 | 0.731                                                        | 0.568                          | 1365.13            | 775.95             | 0.416                          | 967.01             | 401.94             |

| ProbeName      | Target position of probe on CpG island microarray | TargetID           | GeneSymbol    | CpG island Description | Ratio of relative methylation (TiO <sub>2</sub> -NP/Vehicle) | Sham group                     |                    |                    | TiO <sub>2</sub> -H group      |                    |                    |
|----------------|---------------------------------------------------|--------------------|---------------|------------------------|--------------------------------------------------------------|--------------------------------|--------------------|--------------------|--------------------------------|--------------------|--------------------|
|                |                                                   |                    |               |                        |                                                              | Relative methylation (Cy5/Cy3) | Cy3 signal (Input) | Cy5 signal (MeDIP) | Relative methylation (Cy5/Cy3) | Cy3 signal (Input) | Cy5 signal (MeDIP) |
| A_68_P28050120 | chr11:97224658-97224702                           | NM_138657:816      | Socs7         | INSIDE                 | 0.731                                                        | 0.519                          | 1464.36            | 759.51             | 0.379                          | 1082.23            | 410.54             |
| A_68_P20456737 | chr1:95531806-95531850                            | NM_021537:476      | Stk25         | INSIDE                 | 0.731                                                        | 0.628                          | 2118.33            | 1331.00            | 0.459                          | 1616.44            | 742.20             |
| A_68_P21081131 | chr2:26771732-26771776                            | NM_013678:-186     | Surf2         | PROMOTER               | 0.731                                                        | 0.550                          | 1339.48            | 737.21             | 0.402                          | 1029.42            | 413.95             |
| A_68_P23395559 | chr4:148000804-148000848                          | NM_001003898:279   | Tardbp        | INSIDE                 | 0.731                                                        | 0.495                          | 1299.99            | 643.76             | 0.362                          | 1020.98            | 369.37             |
| A_68_P31879126 | chr18:83080440-83080484                           | NM_001177464:-3561 | Zfp516        | PROMOTER               | 0.731                                                        | 0.596                          | 1627.23            | 969.64             | 0.436                          | 1286.50            | 560.63             |
| A_68_P22314993 | chr3:88447939-88447984                            | NM_001198912:22646 | Arhgef2       | INSIDE                 | 0.730                                                        | 3.396                          | 533.25             | 1810.86            | 2.480                          | 529.34             | 1312.88            |
| A_68_P31001860 | chr16:98144127-98144171                           | NM_174847:95       | C2cd2         | INSIDE                 | 0.730                                                        | 0.608                          | 1436.86            | 873.60             | 0.444                          | 1267.08            | 562.54             |
| A_68_P22893527 | chr4:47258362-47258406                            | NM_009928:37501    | Col15a1       | INSIDE                 | 0.730                                                        | 2.735                          | 444.65             | 1216.09            | 1.998                          | 476.01             | 950.92             |
| A_68_P26658154 | chr9:77955972-77956016                            | NM_023605:469      | Fbxo9         | INSIDE                 | 0.730                                                        | 0.420                          | 1456.74            | 611.34             | 0.306                          | 1126.44            | 344.96             |
| A_68_P27278593 | chr10:79198358-79198402                           | NM_008226:19002    | Hcn2          | INSIDE                 | 0.730                                                        | 2.195                          | 1057.60            | 2321.40            | 1.602                          | 960.91             | 1539.43            |
| A_68_P29229616 | chr13:94269682-94269726                           | NM_021310:59       | Jmy           | INSIDE                 | 0.730                                                        | 0.620                          | 997.64             | 618.27             | 0.452                          | 859.63             | 388.98             |
| A_68_P30961943 | chr16:91270119-91270163                           | NM_016968:127      | Olig1         | INSIDE                 | 0.730                                                        | 0.655                          | 1037.24            | 678.90             | 0.478                          | 715.41             | 342.06             |
| A_68_P25972612 | chr8:77737217-77737261                            | NM_029182:-604     | Rasd2         | PROMOTER               | 0.730                                                        | 0.575                          | 1037.15            | 596.20             | 0.419                          | 865.12             | 362.81             |
| A_68_P21101094 | chr2:29917589-29917633                            | NM_001204875:-4383 | Set           | PROMOTER               | 0.730                                                        | 0.649                          | 931.57             | 604.35             | 0.474                          | 787.60             | 373.05             |
| A_68_P29879706 | chr14:106295189-106295234                         | NM_011897:825      | Spry2         | INSIDE                 | 0.730                                                        | 0.613                          | 1075.97            | 659.90             | 0.448                          | 1048.06            | 469.19             |
| A_68_P31056402 | chr17:13898617-13898661                           | NM_022311:-237     | Tete2         | PROMOTER               | 0.730                                                        | 0.520                          | 1287.85            | 669.45             | 0.379                          | 1046.31            | 396.80             |
| A_68_P30176276 | chr15:43308988-43309032                           | NM_025736:236      | Ttc35         | INSIDE                 | 0.730                                                        | 0.619                          | 998.62             | 618.58             | 0.452                          | 691.14             | 312.52             |
| A_68_P26216697 | chr8:122434504-122434548                          | NM_009462:-225     | Usp10         | PROMOTER               | 0.730                                                        | 0.620                          | 2512.02            | 1557.68            | 0.453                          | 2199.16            | 995.18             |
| A_68_P22321213 | chr3:89519038-89519082                            | NM_001038587:117   | Adar          | INSIDE                 | 0.729                                                        | 0.468                          | 1699.68            | 795.95             | 0.342                          | 1244.87            | 425.27             |
| A_68_P29234320 | chr13:95128962-95129006                           | NM_009680:70       | Ap3b1         | INSIDE                 | 0.729                                                        | 0.528                          | 1627.44            | 859.83             | 0.385                          | 1408.38            | 542.15             |
| A_68_P26544128 | chr9:57684324-57684368                            | NM_019689:-2305    | Arid3b        | PROMOTER               | 0.729                                                        | 0.662                          | 1698.33            | 1124.52            | 0.483                          | 1408.74            | 679.73             |
| A_68_P30388927 | chr15:83357675-83357720                           | NM_007546:406      | Bik           | INSIDE                 | 0.729                                                        | 0.317                          | 2292.07            | 725.67             | 0.231                          | 1724.60            | 397.91             |
| A_68_P24995608 | chr7:20443293-20443337                            | NM_001033419:3334  | Ceacam16      | INSIDE                 | 0.729                                                        | 1.971                          | 1047.32            | 2063.88            | 1.437                          | 937.75             | 1347.93            |
| A_68_P21319993 | chr2:71367466-71367510                            | NM_010053:-13      | Dlx1          | PROMOTER               | 0.729                                                        | 0.675                          | 1582.09            | 1067.27            | 0.492                          | 1113.15            | 547.26             |
| A_68_P22248557 | chr3:75750620-75750664                            | NM_175193:10111    | Golim4        | INSIDE                 | 0.729                                                        | 2.507                          | 386.07             | 967.93             | 1.827                          | 453.87             | 829.06             |
| A_68_P26020945 | chr8:87180658-87180702                            | NM_010499:6071     | Ier2          | DOWNSTREAM             | 0.729                                                        | 0.672                          | 1291.13            | 867.10             | 0.490                          | 1027.75            | 503.38             |
| A_68_P23637403 | chr5:42152928-42152972                            | NM_007524:2509     | Nkx3-2        | INSIDE                 | 0.729                                                        | 2.186                          | 939.08             | 2053.26            | 1.594                          | 815.44             | 1300.20            |
| A_68_P23201334 | chr4:109149385-109149429                          | NM_013876:-296     | Rnf11         | PROMOTER               | 0.729                                                        | 2.399                          | 1504.44            | 3608.47            | 1.749                          | 1220.93            | 2135.93            |
| A_68_P26001116 | chr8:83262423-83262467                            | NM_053124:914      | Smarca5       | INSIDE                 | 0.729                                                        | 0.637                          | 829.84             | 528.52             | 0.464                          | 808.72             | 375.36             |
| A_68_P30452134 | chr15:94234215-94234259                           | NM_177431:545      | Adams20       | INSIDE                 | 0.728                                                        | 1.847                          | 4300.23            | 7941.91            | 1.345                          | 3108.86            | 4181.73            |
| A_68_P27952857 | chr11:79968086-79968130                           | NM_172133:445      | Adap2         | INSIDE                 | 0.728                                                        | 2.898                          | 5612.81            | 16263.24           | 2.109                          | 4343.35            | 9158.88            |
| A_68_P25603236 | chr7:151015869-151015913                          | NM_007856:6819     | Dher7         | INSIDE                 | 0.728                                                        | 0.538                          | 1343.99            | 723.48             | 0.392                          | 1008.76            | 395.09             |
| A_68_P30672034 | chr16:35768908-35768952                           | NM_153550:512      | Dire2         | INSIDE                 | 0.728                                                        | 0.711                          | 2075.77            | 1474.91            | 0.517                          | 1784.89            | 923.02             |
| A_68_P23164323 | chr4:102787124-102787168                          | NM_001039081:-4848 | Mier1         | PROMOTER               | 0.728                                                        | 0.645                          | 2308.18            | 1489.19            | 0.470                          | 1736.99            | 815.85             |
| A_68_P20625773 | chr1:135028384-135028428                          | NM_133819:664      | Ppp1r15b      | INSIDE                 | 0.728                                                        | 0.587                          | 1366.41            | 802.11             | 0.427                          | 1034.53            | 442.26             |
| A_68_P22019227 | chr3:28704574-28704618                            | NM_026517:164      | Rpl22l1       | INSIDE                 | 0.728                                                        | 0.441                          | 1194.29            | 526.72             | 0.321                          | 968.68             | 310.82             |
| A_68_P25962754 | chr8:75273669-75273713                            | NM_009188:26504    | Sin3b         | INSIDE                 | 0.728                                                        | 2.229                          | 817.08             | 1820.90            | 1.622                          | 680.00             | 1102.95            |
| A_68_P23984908 | chr5:111714055-111714099                          | NM_024477:405255   | Tie28         | INSIDE                 | 0.728                                                        | 2.279                          | 1091.13            | 2486.69            | 1.660                          | 902.14             | 1497.47            |
| A_68_P21622819 | chr2:128891980-128892024                          | NM_027192:320      | Ttl           | INSIDE                 | 0.728                                                        | 0.660                          | 1061.64            | 700.32             | 0.480                          | 907.30             | 435.57             |
| A_68_P25008266 | chr7:25866428-25866472                            | NM_175477:4186     | Zfp574        | INSIDE                 | 0.728                                                        | 2.511                          | 1484.50            | 3727.76            | 1.827                          | 1220.65            | 2230.65            |
| A_68_P25657384 | chr8:11758629-11758673                            | NM_001113518:321   | Arhgef7       | INSIDE                 | 0.727                                                        | 0.607                          | 1877.76            | 1140.00            | 0.441                          | 1446.63            | 638.34             |
| A_68_P28160636 | chr11:116515196-116515240                         | NM_030206:409      | Cygb          | INSIDE                 | 0.727                                                        | 0.569                          | 1537.01            | 875.06             | 0.414                          | 1223.03            | 506.30             |
| A_68_P25672218 | chr8:14090222-14090266                            | NM_001034862:83    | Erich1        | INSIDE                 | 0.727                                                        | 0.588                          | 1702.59            | 1000.38            | 0.427                          | 1449.47            | 619.36             |
| A_68_P21744414 | chr2:151368303-151368347                          | NM_008019:90       | Fkbp1a        | INSIDE                 | 0.727                                                        | 0.693                          | 1953.48            | 1354.35            | 0.504                          | 1570.54            | 791.13             |
| A_68_P30501630 | chr15:102865341-102865385                         | NM_013553:537      | Hoxc4         | INSIDE                 | 0.727                                                        | 0.320                          | 1947.38            | 623.16             | 0.233                          | 1534.54            | 356.99             |
| A_68_P27946740 | chr11:78858340-78858384                           | NM_013571:101494   | Ksr1          | INSIDE                 | 0.727                                                        | 2.187                          | 962.49             | 2105.12            | 1.590                          | 843.46             | 1341.01            |
| A_68_P25771672 | chr8:35039940-35039984                            | NM_001042674:351   | Rbpms         | INSIDE                 | 0.727                                                        | 0.645                          | 1149.59            | 741.54             | 0.469                          | 1070.21            | 502.02             |
| A_68_P24061231 | chr5:124874924-124874968                          | NM_001081203:977   | Sbno1         | INSIDE                 | 0.727                                                        | 0.429                          | 1705.12            | 713.13             | 0.312                          | 1172.93            | 365.80             |
| A_68_P20411723 | chr1:88255233-88255277                            | NR_002851:-2352    | Snord82       | PROMOTER               | 0.727                                                        | 0.639                          | 3092.42            | 1975.33            | 0.465                          | 2383.96            | 1107.49            |
| A_68_P27253410 | chr10:74388131-74388175                           |                    |               | Unknown                | 0.727                                                        | 0.649                          | 1019.88            | 661.54             | 0.471                          | 899.93             | 424.16             |
| A_68_P22775166 | chr4:21775651-21775695                            | NR_028384:-77      | 4930528A17Rik | PROMOTER               | 0.726                                                        | 0.579                          | 1118.53            | 647.08             | 0.420                          | 982.88             | 413.00             |



| ProbeName      | Target position of probe on CpG island microarray | TargetID            | GeneSymbol    | CpG island Description | Ratio of relative methylation (TiO <sub>2</sub> -NP/Vehicle) | Sham group                     |                    |                    | TiO <sub>2</sub> -H group      |                    |                    |
|----------------|---------------------------------------------------|---------------------|---------------|------------------------|--------------------------------------------------------------|--------------------------------|--------------------|--------------------|--------------------------------|--------------------|--------------------|
|                |                                                   |                     |               |                        |                                                              | Relative methylation (Cy5/Cy3) | Cy3 signal (Input) | Cy5 signal (MeDIP) | Relative methylation (Cy5/Cy3) | Cy3 signal (Input) | Cy5 signal (MeDIP) |
| A_68_P28068585 | chr11:100389285-100389329                         | NM_001199296:8      | Aclly         | INSIDE                 | 0.726                                                        | 0.422                          | 1825.44            | 769.51             | 0.306                          | 1350.08            | 413.08             |
| A_68_P23999132 | chr5:114064289-114064333                          | NM_008153:36089     | Cmklr1        | INSIDE                 | 0.726                                                        | 3.831                          | 3808.84            | 14590.68           | 2.781                          | 2486.06            | 6914.23            |
| A_68_P32219575 | chr19:59534436-59534480                           | NM_010132:1279      | Emx2          | INSIDE                 | 0.726                                                        | 0.574                          | 1237.61            | 710.37             | 0.417                          | 867.12             | 361.54             |
| A_68_P32581184 | chrX:102959900-102959944                          | NM_030614:107       | Fgf16         | INSIDE                 | 0.726                                                        | 2.257                          | 817.00             | 1843.61            | 1.639                          | 505.12             | 827.92             |
| A_68_P26406139 | chr9:32348076-32348120                            | NM_008026:855       | Fii1          | INSIDE                 | 0.726                                                        | 0.619                          | 1003.44            | 620.84             | 0.449                          | 908.47             | 408.04             |
| A_68_P25196761 | chr7:75098172-75098216                            | NM_010513:1052      | Igflr         | INSIDE                 | 0.726                                                        | 0.562                          | 1573.79            | 884.44             | 0.408                          | 1281.11            | 522.68             |
| A_68_P26065139 | chr8:94882073-94882117                            | NM_018826:400       | Irx5          | INSIDE                 | 0.726                                                        | 0.459                          | 1623.30            | 745.58             | 0.334                          | 1287.46            | 429.42             |
| A_68_P31556683 | chr18:23910867-23910911                           | NM_001162941:-1337  | Mapre2        | PROMOTER               | 0.726                                                        | 0.645                          | 1567.35            | 1010.52            | 0.468                          | 1251.24            | 585.91             |
| A_68_P28246291 | chr12:12946601-12946645                           | NM_008709:2020      | Mycn          | INSIDE                 | 0.726                                                        | 0.545                          | 2001.94            | 1091.43            | 0.396                          | 1632.13            | 645.61             |
| A_68_P23527255 | chr5:21181848-21181895                            | NM_178728:25292     | Napepld       | INSIDE                 | 0.726                                                        | 3.511                          | 778.44             | 2733.38            | 2.550                          | 605.52             | 1544.39            |
| A_68_P29443157 | chr14:20570549-20570593                           | NM_008695:92        | Nid2          | INSIDE                 | 0.726                                                        | 0.476                          | 1258.67            | 599.71             | 0.346                          | 1055.56            | 365.18             |
| A_68_P25911983 | chr8:64238848-64238892                            | NM_001081390:142617 | Palld         | INSIDE                 | 0.726                                                        | 2.786                          | 1881.97            | 5243.79            | 2.023                          | 1329.72            | 2690.63            |
| A_68_P30346973 | chr15:76062555-76062599                           | NM_001163542:-768   | Plec          | PROMOTER               | 0.726                                                        | 0.397                          | 1343.09            | 533.67             | 0.288                          | 1077.52            | 310.76             |
| A_68_P23365310 | chr4:141220298-141220342                          | NM_001033150:-290   | Plekhh2       | PROMOTER               | 0.726                                                        | 0.705                          | 3434.16            | 2420.21            | 0.512                          | 2590.37            | 1325.76            |
| A_68_P27751867 | chr11:43519036-43519080                           | NM_027557:23559     | Pwvwp2a       | INSIDE                 | 0.726                                                        | 3.412                          | 575.27             | 1962.55            | 2.476                          | 476.34             | 1179.43            |
| A_68_P22317139 | chr3:88895370-88895414                            | NM_001083808:-1439  | Rusc1         | PROMOTER               | 0.726                                                        | 0.375                          | 1573.19            | 590.29             | 0.272                          | 1277.21            | 347.71             |
| A_68_P28469856 | chr12:60113095-60113139                           | NM_009147:-112      | Sec23a        | DIVERGENT_PROMOTER     | 0.726                                                        | 2.552                          | 2382.29            | 6080.36            | 1.853                          | 1786.13            | 3309.17            |
| A_68_P27354561 | chr10:93052055-93052099                           | NM_027246:327       | Snrpf         | INSIDE                 | 0.726                                                        | 0.594                          | 1572.21            | 934.07             | 0.431                          | 1214.94            | 523.94             |
| A_68_P27923258 | chr11:74739141-74739185                           | NM_001163311:138    | Srr           | INSIDE                 | 0.726                                                        | 0.671                          | 2051.24            | 1377.33            | 0.488                          | 1588.95            | 774.67             |
| A_68_P23222803 | chr4:114672646-114672690                          | NM_009185:-54       | Stil          | PROMOTER               | 0.726                                                        | 2.772                          | 439.73             | 1219.03            | 2.012                          | 460.43             | 926.57             |
| A_68_P22379763 | chr3:102007843-102007887                          | NM_001165951:22     | Vangl1        | INSIDE                 | 0.726                                                        | 0.708                          | 2178.67            | 1543.47            | 0.514                          | 1869.83            | 961.19             |
| A_68_P23610765 | chr5:37358054-37358098                            | NM_011716:22145     | Wfs1          | INSIDE                 | 0.726                                                        | 2.103                          | 2438.55            | 5127.22            | 1.526                          | 1884.04            | 2875.12            |
| A_68_P20350461 | chr1:74829526-74829570                            | NM_009526:11083     | Wnt6          | INSIDE                 | 0.726                                                        | 3.505                          | 6411.19            | 22469.51           | 2.543                          | 4259.33            | 10832.63           |
| A_68_P27288886 | chr10:80787882-80787926                           | NM_027381:4057      | 2510012108Rik | INSIDE                 | 0.725                                                        | 2.545                          | 960.61             | 2444.53            | 1.846                          | 859.70             | 1587.00            |
| A_68_P30579425 | chr16:18392661-18392705                           | NM_033474:44316     | Arvcf         | INSIDE                 | 0.725                                                        | 3.256                          | 430.59             | 1402.20            | 2.360                          | 516.79             | 1219.56            |
| A_68_P27643055 | chr11:22759832-22759876                           | NM_016888:-119      | B3gnt2        | PROMOTER               | 0.725                                                        | 0.708                          | 2446.67            | 1733.39            | 0.514                          | 1999.02            | 1027.21            |
| A_68_P24951536 | chr7:4960475-4960519                              | NM_001110330:4348   | Fiz1          | INSIDE                 | 0.725                                                        | 2.257                          | 801.86             | 1809.48            | 1.635                          | 620.70             | 1015.09            |
| A_68_P28456271 | chr12:57446391-57446435                           | NM_145442:469       | Mbp1          | INSIDE                 | 0.725                                                        | 0.637                          | 1498.38            | 954.48             | 0.462                          | 1183.34            | 546.69             |
| A_68_P24224752 | chr6:8159107-8159151                              | NM_145374:-98       | Mios          | PROMOTER               | 0.725                                                        | 0.545                          | 1524.88            | 831.58             | 0.395                          | 1296.90            | 512.44             |
| A_68_P27265100 | chr10:76424357-76424401                           | NM_021568:314       | Pebp3         | INSIDE                 | 0.725                                                        | 0.698                          | 1178.78            | 822.39             | 0.506                          | 899.86             | 454.98             |
| A_68_P25505714 | chr7:134615579-13461624                           | NM_145589:474       | Prr14         | INSIDE                 | 0.725                                                        | 0.595                          | 953.39             | 567.68             | 0.432                          | 762.13             | 328.88             |
| A_68_P28945956 | chr13:35998142-35998186                           | NM_145938:52        | Rpp40         | INSIDE                 | 0.725                                                        | 0.392                          | 1535.69            | 602.67             | 0.285                          | 1254.13            | 357.02             |
| A_68_P20346580 | chr1:74115002-74115046                            | NM_027884:55997     | Tns1          | INSIDE                 | 0.725                                                        | 0.636                          | 2087.10            | 1327.26            | 0.461                          | 1726.54            | 795.73             |
| A_68_P26347946 | chr9:21397416-21397460                            | NM_001205157:-163   | Yipf2         | PROMOTER               | 0.725                                                        | 0.561                          | 1870.46            | 1048.65            | 0.406                          | 1520.99            | 618.19             |
| A_68_P21962517 | chr3:16083263-16083307                            | NM_001145919:102    | Ythdf3        | INSIDE                 | 0.725                                                        | 0.729                          | 3048.18            | 2222.63            | 0.529                          | 2510.01            | 1327.74            |
| A_68_P26232969 | chr8:124900303-124900347                          | NM_001029993:-191   | Zc3h18        | PROMOTER               | 0.725                                                        | 0.435                          | 1557.37            | 677.25             | 0.315                          | 1218.96            | 384.38             |
| A_68_P28881067 | chr13:23461111-23461155                           | NM_001111107:-61    | Zfp322a       | PROMOTER               | 0.725                                                        | 0.538                          | 2214.96            | 1191.95            | 0.390                          | 1627.99            | 635.28             |
| A_68_P32906205 | A_68_P32906205                                    |                     |               | Unknown                | 0.725                                                        | 3.600                          | 294.84             | 1061.53            | 2.611                          | 267.52             | 698.39             |
| A_68_P32134057 | chr19:44809349-44809393                           |                     |               | Unknown                | 0.725                                                        | 0.623                          | 1276.50            | 795.45             | 0.452                          | 1205.40            | 544.56             |
| A_68_P21151652 | chr2:38863473-38863517                            | NM_028809:-164      | Arpc51        | DIVERGENT_PROMOTER     | 0.724                                                        | 0.591                          | 1733.98            | 1023.98            | 0.427                          | 1392.30            | 595.09             |
| A_68_P30246247 | chr15:57966117-57966161                           | NM_027435:499       | Atad2         | INSIDE                 | 0.724                                                        | 0.676                          | 1828.16            | 1235.95            | 0.490                          | 1578.61            | 773.15             |
| A_68_P27281236 | chr10:79605321-79605365                           | NM_025313:283       | Atp5d         | INSIDE                 | 0.724                                                        | 0.718                          | 2994.40            | 2149.61            | 0.520                          | 2273.14            | 1182.05            |
| A_68_P29413809 | chr14:13654279-13654328                           | NM_001042617:1290   | Cadps         | INSIDE                 | 0.724                                                        | 0.487                          | 1275.96            | 621.37             | 0.352                          | 1089.34            | 383.89             |
| A_68_P20633195 | chr1:136302482-136302526                          | NM_028057:-62       | Cyb5r1        | PROMOTER               | 0.724                                                        | 0.562                          | 1422.57            | 799.58             | 0.407                          | 1326.68            | 539.53             |
| A_68_P23416723 | chr4:151505009-151505053                          | NM_019585:-1996     | Espn          | PROMOTER               | 0.724                                                        | 0.433                          | 1589.00            | 687.41             | 0.313                          | 1365.09            | 427.71             |
| A_68_P29702645 | chr14:71041804-71041848                           | NM_008004:249       | Fgf17         | INSIDE                 | 0.724                                                        | 0.464                          | 1140.24            | 529.50             | 0.336                          | 953.06             | 320.39             |
| A_68_P25766304 | chr8:33995018-33995062                            | NM_001177589:65458  | Gm3985        | DOWNSTREAM             | 0.724                                                        | 0.674                          | 2432.88            | 1640.15            | 0.488                          | 1792.19            | 875.33             |
| A_68_P26807873 | chr9:107240712-107240756                          | NM_133984:-53       | Hemk1         | DIVERGENT_PROMOTER     | 0.724                                                        | 0.676                          | 2187.57            | 1478.11            | 0.489                          | 1638.98            | 801.25             |
| A_68_P31936363 | chr19:6914626-6914670                             | NM_019924:443       | Rps6ka4       | INSIDE                 | 0.724                                                        | 0.701                          | 2019.36            | 1416.39            | 0.508                          | 1506.29            | 765.37             |
| A_68_P21843326 | chr2:168578051-168578095                          | NM_175303:14629     | Sall4         | INSIDE                 | 0.724                                                        | 2.479                          | 722.93             | 1791.90            | 1.796                          | 619.20             | 1111.90            |
| A_68_P24769158 | chr6:115084990-115085034                          | NM_013681:93        | Syn2          | INSIDE                 | 0.724                                                        | 0.590                          | 1155.87            | 682.44             | 0.427                          | 974.73             | 416.56             |

| ProbeName      | Target position of probe on CpG island microarray | TargetID                 | GeneSymbol     | CpG island Description | Ratio of relative methylation (TiO <sub>2</sub> -NP/Vehicle) | Sham group                     |                    |                    | TiO <sub>2</sub> -H group      |                    |                    |
|----------------|---------------------------------------------------|--------------------------|----------------|------------------------|--------------------------------------------------------------|--------------------------------|--------------------|--------------------|--------------------------------|--------------------|--------------------|
|                |                                                   |                          |                |                        |                                                              | Relative methylation (Cy5/Cy3) | Cy3 signal (Input) | Cy5 signal (MeDIP) | Relative methylation (Cy5/Cy3) | Cy3 signal (Input) | Cy5 signal (MeDIP) |
| A_68_P30546424 | chr16:11134701-11134745                           | NM_029582:-97            | Txndc11        | PROMOTER               | 0.724                                                        | 0.618                          | 2124.13            | 1313.17            | 0.447                          | 1792.72            | 801.92             |
| A_68_P24019918 | chr5:117768976-117769020                          | NM_001033311:-276        | Vsig10         | PROMOTER               | 0.724                                                        | 0.656                          | 1275.68            | 837.32             | 0.475                          | 1066.68            | 506.94             |
| A_68_P32119204 | chr19:42203483-42203527                           | NM_027106:-21            | Avp1l          | PROMOTER               | 0.723                                                        | 0.598                          | 2006.72            | 1199.15            | 0.432                          | 1500.61            | 648.02             |
| A_68_P25845473 | chr8:49195312-49195356                            | NM_001161515:-32         | Dctd1          | PROMOTER               | 0.723                                                        | 0.546                          | 1360.88            | 742.56             | 0.395                          | 1002.96            | 395.71             |
| A_68_P25006995 | chr7:25655239-25655283                            | NM_027732:185            | Dmrtd2         | INSIDE                 | 0.723                                                        | 1.952                          | 2884.94            | 5630.54            | 1.411                          | 2332.56            | 3290.51            |
| A_68_P25842940 | chr8:48759447-48759491                            | NM_023503:1045           | Ing2           | INSIDE                 | 0.723                                                        | 0.672                          | 1567.93            | 1053.26            | 0.486                          | 1257.65            | 610.81             |
| A_68_P24592784 | chr6:83276117-83276161                            | NM_145571:106            | Mobk11b        | INSIDE                 | 0.723                                                        | 0.528                          | 1769.97            | 934.40             | 0.382                          | 1482.24            | 566.09             |
| A_68_P25954888 | chr8:73437092-73437136                            | NM_173013:7242           | Mtap1s         | INSIDE                 | 0.723                                                        | 2.677                          | 683.84             | 1830.83            | 1.936                          | 619.43             | 1199.37            |
| A_68_P21722729 | chr2:147009831-147009875                          | NR_030769:34             | Nkx2-2as       | INSIDE                 | 0.723                                                        | 0.516                          | 1165.88            | 601.81             | 0.373                          | 948.28             | 354.00             |
| A_68_P24754178 | chr6:112439612-112439656                          | NM_001081147:168         | Oxtr           | INSIDE                 | 0.723                                                        | 0.617                          | 1312.04            | 809.58             | 0.446                          | 1144.24            | 510.31             |
| A_68_P24980581 | chr7:16858769-16858813                            | NM_001136270:251         | Prr24          | INSIDE                 | 0.723                                                        | 2.753                          | 5266.99            | 14498.28           | 1.989                          | 3841.92            | 7643.04            |
| A_68_P21740963 | chr2:150612754-150612798                          | NM_153781:245            | Pygb           | INSIDE                 | 0.723                                                        | 0.500                          | 1332.57            | 665.82             | 0.361                          | 1092.93            | 394.88             |
| A_68_P25398381 | chr7:114352789-114352833                          | NM_029660:-148           | Rbmxl2         | PROMOTER               | 0.723                                                        | 1.905                          | 1538.86            | 2931.71            | 1.377                          | 1427.39            | 1966.18            |
| A_68_P30578595 | chr16:18249063-18249107                           | NM_001080999:109         | Trmt2a         | INSIDE                 | 0.723                                                        | 0.516                          | 1058.52            | 546.66             | 0.373                          | 810.33             | 302.63             |
| A_68_P28917611 | chr13:30637211-30637255                           | NM_025710:-47            | Uqerfs1        | PROMOTER               | 0.723                                                        | 0.595                          | 1234.91            | 734.71             | 0.430                          | 950.19             | 408.75             |
| A_68_P29285951 | chr13:104382683-104382727                         | BC099526:115009          |                | INSIDE                 | 0.723                                                        | 2.281                          | 2510.19            | 5725.30            | 1.649                          | 2305.88            | 3801.85            |
| A_68_P22503485 | chr3:126300309-126300353                          | NM_001025438:440         | Camk2d         | INSIDE                 | 0.722                                                        | 0.693                          | 1737.71            | 1205.09            | 0.500                          | 1415.49            | 708.28             |
| A_68_P27171226 | chr10:59342593-59342637                           | NM_019965:276            | Dnajb12        | INSIDE                 | 0.722                                                        | 0.448                          | 4791.16            | 2148.15            | 0.324                          | 3910.47            | 1265.20            |
| A_68_P25616320 | chr8:4166752-4166796                              | NM_001039578:208         | Evi5l          | INSIDE                 | 0.722                                                        | 0.660                          | 2131.01            | 1406.08            | 0.476                          | 1685.31            | 802.97             |
| A_68_P27290415 | chr10:81007993-81008037                           | NM_010301:-223           | Gna11          | PROMOTER               | 0.722                                                        | 0.643                          | 2016.80            | 1296.83            | 0.464                          | 1644.74            | 763.87             |
| A_68_P24521961 | chr6:67485251-67485297                            | NM_020047:542            | Tacstd2        | INSIDE                 | 0.722                                                        | 0.409                          | 1551.17            | 634.54             | 0.296                          | 1295.90            | 382.98             |
| A_68_P31953437 | chr19:10956463-10956507                           | NM_134142:-251           | Tmem109        | PROMOTER               | 0.722                                                        | 0.451                          | 1575.94            | 711.32             | 0.326                          | 1156.95            | 377.26             |
| A_68_P30302244 | chr15:68090487-68090531                           | NM_001145888:-90         | Zfat           | PROMOTER               | 0.722                                                        | 0.541                          | 1139.57            | 616.28             | 0.391                          | 1082.92            | 422.94             |
| A_68_P28277949 | chr12:19888314-19888358                           | ENSMUST00000103822:-9494 |                | PROMOTER               | 0.722                                                        | 2.760                          | 1052.64            | 2905.42            | 1.993                          | 1034.55            | 2061.88            |
| A_68_P22859652 | chr4:40895697-40895741                            | NM_029814:133            | Chmp5          | INSIDE                 | 0.721                                                        | 0.651                          | 3551.89            | 2311.20            | 0.469                          | 2606.32            | 1223.31            |
| A_68_P28056292 | chr11:98274199-98274243                           | NM_001003817:423         | Erbp2          | INSIDE                 | 0.721                                                        | 0.454                          | 1283.62            | 582.49             | 0.327                          | 1139.41            | 372.54             |
| A_68_P29723691 | chr14:75132032-75132076                           | NM_016903:-97            | Esd            | PROMOTER               | 0.721                                                        | 0.677                          | 2366.09            | 1601.63            | 0.488                          | 1872.60            | 913.61             |
| A_68_P29134817 | chr13:72767989-72768033                           | NM_010574:1585           | Irx2           | INSIDE                 | 0.721                                                        | 0.653                          | 1126.79            | 735.89             | 0.471                          | 1044.53            | 491.57             |
| A_68_P31354400 | chr17:75404960-75405004                           | NM_019919:114            | Ltbp1          | INSIDE                 | 0.721                                                        | 0.486                          | 3499.70            | 1699.32            | 0.350                          | 2796.02            | 978.30             |
| A_68_P21587250 | chr2:122463614-122463658                          | NR_030547:-2902          | Mir147         | PROMOTER               | 0.721                                                        | 0.554                          | 1299.05            | 719.96             | 0.400                          | 1149.60            | 459.48             |
| A_68_P27568981 | chr11:6428736-6428780                             | NM_178440:-7797          | Myo1g          | PROMOTER               | 0.721                                                        | 0.598                          | 1232.80            | 737.29             | 0.431                          | 965.34             | 416.37             |
| A_68_P26138124 | chr8:108693007-108693051                          | NM_178798:254            | Slc7a6         | INSIDE                 | 0.721                                                        | 0.694                          | 2550.07            | 1770.81            | 0.501                          | 2102.15            | 1052.79            |
| A_68_P28909016 | chr13:29050255-29050299                           | NM_009238:-4725          | Sox4           | PROMOTER               | 0.721                                                        | 0.674                          | 1299.26            | 875.59             | 0.486                          | 944.50             | 458.62             |
| A_68_P24009037 | chr5:115777935-115777979                          | NM_025573:771            | Srsf9          | INSIDE                 | 0.721                                                        | 0.636                          | 1498.35            | 953.06             | 0.458                          | 1200.46            | 550.24             |
| A_68_P23608581 | chr5:36924292-36924336                            | NM_133910:732            | Tbc1d14        | INSIDE                 | 0.721                                                        | 0.662                          | 4456.69            | 2948.49            | 0.477                          | 3334.78            | 1591.27            |
| A_68_P30328130 | chr15:72888613-72888657                           | NM_029640:-2392          | Trappe9        | PROMOTER               | 0.721                                                        | 2.346                          | 1403.91            | 3293.55            | 1.692                          | 1079.29            | 1826.08            |
| A_68_P29531323 | chr14:35487371-35487415                           | NM_001004436:279         | Wapal          | INSIDE                 | 0.721                                                        | 0.692                          | 1317.12            | 910.80             | 0.499                          | 1136.07            | 566.73             |
| A_68_P28730613 | chr12:110132574-110132618                         | NM_177602:115            | Wdr25          | INSIDE                 | 0.721                                                        | 0.610                          | 1638.80            | 1000.12            | 0.440                          | 1288.58            | 566.68             |
| A_68_P31002107 | chr16:98183148-98183192                           | NM_001081684:616         | Zfp295         | INSIDE                 | 0.721                                                        | 0.520                          | 1818.21            | 945.66             | 0.375                          | 1511.68            | 566.97             |
| A_68_P27271357 | chr10:77441161-77441205                           | NM_026431:-212           | R1810043G02Rik | DIVERGENT_PROMOTER     | 0.720                                                        | 0.483                          | 1951.51            | 942.68             | 0.348                          | 1717.07            | 597.32             |
| A_68_P32053385 | chr19:29596534-29596578                           | NR_015567:-79            | A930007I19Rik  | DIVERGENT_PROMOTER     | 0.720                                                        | 0.737                          | 2869.42            | 2115.98            | 0.531                          | 2627.62            | 1394.73            |
| A_68_P24513201 | chr6:65621722-65621766                            | NM_172399:140            | A930038C07Rik  | INSIDE                 | 0.720                                                        | 0.723                          | 3318.04            | 2400.39            | 0.521                          | 2544.83            | 1326.45            |
| A_68_P26200116 | chr8:119517155-119517199                          | NM_026572:173            | Gesh           | INSIDE                 | 0.720                                                        | 0.504                          | 1696.26            | 854.39             | 0.363                          | 1445.00            | 524.11             |
| A_68_P27902204 | chr11:70514324-70514368                           | NM_153103:297            | Kif1c          | INSIDE                 | 0.720                                                        | 0.443                          | 1303.14            | 576.95             | 0.319                          | 1109.21            | 353.36             |
| A_68_P24126715 | chr5:138070507-138070551                          | NM_001168652:178         | Lrch4          | INSIDE                 | 0.720                                                        | 0.685                          | 1215.29            | 831.94             | 0.493                          | 1012.01            | 498.74             |
| A_68_P31259250 | chr17:57074995-57075039                           | NM_022328:-205           | Mllt1          | PROMOTER               | 0.720                                                        | 0.449                          | 1321.39            | 592.84             | 0.323                          | 1165.32            | 376.45             |
| A_68_P30346760 | chr15:76028479-76028523                           | NM_201394:-2360          | Plec           | PROMOTER               | 0.720                                                        | 0.614                          | 1070.98            | 657.66             | 0.442                          | 945.58             | 418.34             |
| A_68_P30379303 | chr15:81560107-81560151                           | NM_001146174:221         | Rangap1        | INSIDE                 | 0.720                                                        | 0.393                          | 1970.06            | 774.74             | 0.283                          | 1525.51            | 431.85             |
| A_68_P32289245 | chrX:20195246-20195290                            | NM_001167776:384         | Rbm10          | INSIDE                 | 0.720                                                        | 2.587                          | 3608.99            | 9337.43            | 1.864                          | 1619.59            | 3018.40            |
| A_68_P31207190 | chr17:46624075-46624119                           | NM_001162864:528         | Tibk1          | INSIDE                 | 0.720                                                        | 4.483                          | 3248.45            | 14563.17           | 3.227                          | 2079.66            | 6711.74            |
| A_68_P20056409 | chr1:16609431-16609475                            | NM_025773:-85            | Ube2w          | PROMOTER               | 0.720                                                        | 0.346                          | 2610.97            | 904.10             | 0.249                          | 2344.68            | 584.60             |

| ProbeName      | Target position of probe on CpG island microarray | TargetID           | GeneSymbol    | CpG island Description | Ratio of relative methylation (TiO <sub>2</sub> -NP/Vehicle) | Sham group                     |                    |                    | TiO <sub>2</sub> -H group      |                    |                    |
|----------------|---------------------------------------------------|--------------------|---------------|------------------------|--------------------------------------------------------------|--------------------------------|--------------------|--------------------|--------------------------------|--------------------|--------------------|
|                |                                                   |                    |               |                        |                                                              | Relative methylation (Cy5/Cy3) | Cy3 signal (Input) | Cy5 signal (MeDIP) | Relative methylation (Cy5/Cy3) | Cy3 signal (Input) | Cy5 signal (MeDIP) |
| A_68_P23227951 | chr4:115817250-115817294                          | NM_026547:-51      | 1520402A15Rik | DIVERGENT_PROMOTER     | 0.719                                                        | 0.607                          | 1179.98            | 716.58             | 0.437                          | 1103.68            | 481.91             |
| A_68_P27938082 | chr11:77329483-77329527                           | NM_026185:886      | Abhd15        | INSIDE                 | 0.719                                                        | 0.533                          | 1127.68            | 601.46             | 0.384                          | 838.66             | 321.77             |
| A_68_P23897556 | chr5:93474347-93474391                            | NM_175270:-320     | Ankrd56       | PROMOTER               | 0.719                                                        | 0.549                          | 1587.32            | 871.67             | 0.395                          | 1315.92            | 519.68             |
| A_68_P24004688 | chr5:115018396-115018440                          | NM_001004180:159   | BC057022      | INSIDE                 | 0.719                                                        | 0.528                          | 1162.69            | 613.93             | 0.380                          | 903.62             | 343.12             |
| A_68_P22340620 | chr3:94583224-94583268                            | NM_001037711:7191  | Cgn           | INSIDE                 | 0.719                                                        | 2.133                          | 1002.28            | 2137.93            | 1.534                          | 833.28             | 1278.22            |
| A_68_P31286847 | chr17:63230901-63230945                           | NM_010109:-256     | Efna5         | PROMOTER               | 0.719                                                        | 0.659                          | 1972.28            | 1300.33            | 0.474                          | 1514.74            | 717.68             |
| A_68_P30682388 | chr16:37777040-37777084                           | NM_008047:-78      | Fstl1         | PROMOTER               | 0.719                                                        | 0.526                          | 4532.10            | 2385.99            | 0.378                          | 3994.16            | 1511.69            |
| A_68_P27182283 | chr10:61245921-61245965                           | NM_207000:670      | H2afy2        | INSIDE                 | 0.719                                                        | 0.498                          | 1813.66            | 903.99             | 0.358                          | 1521.85            | 545.57             |
| A_68_P28043963 | chr11:96207399-96207443                           | NM_010458:2338     | Hoxb3         | INSIDE                 | 0.719                                                        | 0.711                          | 1627.07            | 1156.80            | 0.511                          | 1398.76            | 714.88             |
| A_68_P28161573 | chr11:116704755-116704799                         | NM_033398:-13      | Jmjd6         | DIVERGENT_PROMOTER     | 0.719                                                        | 0.538                          | 2060.65            | 1107.86            | 0.387                          | 1508.39            | 583.27             |
| A_68_P20634034 | chr1:136457888-136457932                          | NM_152895:1156     | Kdm5b         | INSIDE                 | 0.719                                                        | 0.690                          | 2098.96            | 1448.99            | 0.496                          | 1856.95            | 921.90             |
| A_68_P28696317 | chr12:104480189-104480236                         | NM_133364:144      | Prima1        | INSIDE                 | 0.719                                                        | 2.038                          | 5504.04            | 11217.00           | 1.466                          | 3870.97            | 5675.53            |
| A_68_P21752664 | chr2:152880435-152880479                          | NM_001011732:22869 | Xkr7          | INSIDE                 | 0.719                                                        | 2.559                          | 2806.39            | 7180.79            | 1.839                          | 2288.67            | 4208.29            |
| A_68_P22350125 | chr3:96401803-96401847                            | NM_001024851:1266  | Ankrd34a      | INSIDE                 | 0.718                                                        | 0.546                          | 983.70             | 537.03             | 0.392                          | 770.48             | 301.93             |
| A_68_P27067368 | chr10:36694971-36695015                           | NM_008229:643      | Hdac2         | INSIDE                 | 0.718                                                        | 0.414                          | 1714.73            | 709.38             | 0.297                          | 1342.19            | 398.78             |
| A_68_P26228652 | chr8:124276907-124276951                          | NM_020605:22470    | Jph3          | INSIDE                 | 0.718                                                        | 3.509                          | 1853.02            | 6502.49            | 2.519                          | 1300.98            | 3276.98            |
| A_68_P28035916 | chr11:94852207-94852251                           | NM_172261:-297     | Ppp1r9b       | PROMOTER               | 0.718                                                        | 0.589                          | 2565.33            | 1510.08            | 0.423                          | 1991.50            | 841.45             |
| A_68_P28071924 | chr11:100956580-100956624                         | NM_008949:113      | Psmc3ip       | INSIDE                 | 0.718                                                        | 0.683                          | 1027.19            | 702.04             | 0.491                          | 810.02             | 397.60             |
| A_68_P26464015 | chr9:43611634-43611678                            | NM_021424:58998    | Pvrl1         | INSIDE                 | 0.718                                                        | 3.630                          | 1638.29            | 5946.65            | 2.607                          | 1193.13            | 3110.42            |
| A_68_P21769255 | chr2:155891652-155891696                          | NM_139151:726      | Spag4         | INSIDE                 | 0.718                                                        | 0.600                          | 1703.10            | 1021.05            | 0.431                          | 1173.97            | 591.79             |
| A_68_P24755318 | chr6:112677438-112677482                          | NM_080448:219800   | Srgap3        | INSIDE                 | 0.718                                                        | 2.053                          | 2175.65            | 4466.27            | 1.475                          | 1721.84            | 2539.11            |
| A_68_P27469158 | chr10:114799283-114799327                         | NM_133683:14       | Tmem19        | INSIDE                 | 0.718                                                        | 0.494                          | 1796.02            | 887.50             | 0.355                          | 1479.01            | 524.89             |
| A_68_P28703309 | chr12:105685178-105685222                         |                    |               | Unknown                | 0.718                                                        | 2.408                          | 1667.01            | 4014.48            | 1.729                          | 1200.34            | 2075.13            |
| A_68_P25933300 | chr8:69010290-69010334                            | NM_025465:94       | 1810029B16Rik | INSIDE                 | 0.717                                                        | 0.553                          | 2059.44            | 1137.95            | 0.396                          | 1712.41            | 678.23             |
| A_68_P23437420 | chr4:154624071-154624115                          | NM_001190445:18    | 2610002I02Rik | INSIDE                 | 0.717                                                        | 0.668                          | 995.52             | 665.49             | 0.479                          | 851.02             | 407.95             |
| A_68_P28724523 | chr12:109154940-109154984                         | NM_001079883:86662 | Bcl11b        | INSIDE                 | 0.717                                                        | 3.145                          | 792.49             | 2492.11            | 2.255                          | 699.62             | 1577.63            |
| A_68_P22264731 | chr3:79432542-79432586                            | NM_025794:125      | Etfhd         | INSIDE                 | 0.717                                                        | 0.596                          | 1236.80            | 736.82             | 0.427                          | 1028.30            | 438.96             |
| A_68_P23284715 | chr4:127003542-127003595                          | NM_008126:2801     | Gjb3          | INSIDE                 | 0.717                                                        | 2.157                          | 1169.71            | 2522.77            | 1.546                          | 840.35             | 1299.07            |
| A_68_P26463565 | chr9:43552288-43552332                            | NM_021424:-348     | Pvrl1         | PROMOTER               | 0.717                                                        | 0.648                          | 1136.63            | 736.26             | 0.464                          | 930.78             | 432.28             |
| A_68_P20793342 | chr1:167124624-167124668                          | NM_145512:-82      | Srl2d2        | PROMOTER               | 0.717                                                        | 0.476                          | 1387.72            | 660.89             | 0.342                          | 1174.50            | 401.19             |
| A_68_P31926781 | chr19:5082721-5082765                             | NM_001001885:2735  | Tmem151a      | INSIDE                 | 0.717                                                        | 2.215                          | 652.53             | 1445.61            | 1.588                          | 536.66             | 852.31             |
| A_68_P28470051 | chr12:60162088-60162132                           | NM_030057:338      | Trappe6b      | INSIDE                 | 0.717                                                        | 0.494                          | 3303.83            | 1632.28            | 0.354                          | 2508.90            | 889.09             |
| A_68_P25693344 | chr8:17535329-17535373                            | NM_053171:35       | Csmd1         | INSIDE                 | 0.716                                                        | 0.647                          | 3214.60            | 2080.06            | 0.463                          | 2742.51            | 1270.97            |
| A_68_P31424462 | chr17:88072102-88072146                           | NM_008628:228      | Msh2          | INSIDE                 | 0.716                                                        | 0.599                          | 1052.42            | 630.18             | 0.429                          | 840.72             | 360.42             |
| A_68_P27211071 | chr10:66748168-66748212                           | NM_001036293:-161  | Nrbf2         | PROMOTER               | 0.716                                                        | 0.562                          | 1563.67            | 879.36             | 0.403                          | 1247.18            | 502.43             |
| A_68_P25090464 | chr7:52241287-52241331                            | NM_019830:394      | Prmt1         | INSIDE                 | 0.716                                                        | 0.645                          | 1700.71            | 1096.55            | 0.462                          | 1414.14            | 653.24             |
| A_68_P24536422 | chr6:71390071-71390115                            | NM_024288:539      | Rmnd5a        | INSIDE                 | 0.716                                                        | 0.706                          | 1871.57            | 1321.56            | 0.505                          | 1556.39            | 786.63             |
| A_68_P30601341 | chr16:23108146-23108190                           | NR_030705:-857     | Snord2        | PROMOTER               | 0.716                                                        | 0.530                          | 1273.74            | 674.74             | 0.379                          | 1043.15            | 395.42             |
| A_68_P21706318 | chr2:144096392-144096436                          | NM_024225:-106     | Snx5          | PROMOTER               | 0.716                                                        | 0.660                          | 897.31             | 592.44             | 0.473                          | 735.52             | 347.61             |
| A_68_P20254939 | chr1:57832453-57832497                            | NM_144882:770      | Spats2l       | INSIDE                 | 0.716                                                        | 0.472                          | 1176.24            | 555.26             | 0.338                          | 969.32             | 327.53             |
| A_68_P20353687 | chr1:75384995-75385039                            | NM_001085370:2832  | Speg          | INSIDE                 | 0.716                                                        | 0.480                          | 1580.00            | 758.47             | 0.344                          | 1251.16            | 430.29             |
| A_68_P23590344 | chr5:34000777-34000821                            | NM_001040435:3     | Tacc3         | INSIDE                 | 0.716                                                        | 0.691                          | 1594.79            | 1102.29            | 0.495                          | 1283.49            | 635.10             |
| A_68_P31953350 | chr19:10944106-10944150                           | NM_133804:141      | Tmem132a      | INSIDE                 | 0.716                                                        | 0.605                          | 1262.93            | 764.24             | 0.433                          | 1016.41            | 440.47             |
| A_68_P26170718 | chr8:114400399-114400443                          | NM_025781:155      | Tmem170       | INSIDE                 | 0.716                                                        | 0.654                          | 2599.20            | 1699.42            | 0.468                          | 2204.55            | 1032.32            |
| A_68_P22059398 | chr3:36570005-36570050                            | NM_019510:19062    | Trpc3         | INSIDE                 | 0.716                                                        | 2.155                          | 916.79             | 1975.25            | 1.543                          | 742.68             | 1146.26            |
| A_68_P27913322 | chr11:72609852-72609896                           | NM_001045536:147   | Zzef1         | INSIDE                 | 0.716                                                        | 0.382                          | 1757.70            | 671.21             | 0.273                          | 1630.28            | 445.76             |
| A_68_P27288863 | chr10:80785224-80785268                           | NM_027381:1399     | 2510012I08Rik | INSIDE                 | 0.715                                                        | 2.137                          | 1336.30            | 2855.41            | 1.528                          | 1096.68            | 1675.40            |
| A_68_P31206428 | chr17:46464777-46464821                           | NM_145140:-2083    | Abcc10        | PROMOTER               | 0.715                                                        | 0.585                          | 1231.33            | 720.27             | 0.418                          | 1094.04            | 457.71             |
| A_68_P27750957 | chr11:43342796-43342840                           | NM_001045530:533   | Cenjl         | INSIDE                 | 0.715                                                        | 0.537                          | 2303.45            | 1237.51            | 0.384                          | 1728.76            | 664.29             |
| A_68_P22412465 | chr3:108209988-108210032                          | NM_001004177:8402  | Celsr2        | INSIDE                 | 0.715                                                        | 2.444                          | 2383.87            | 5826.98            | 1.747                          | 1833.46            | 3202.77            |
| A_68_P22344502 | chr3:95363644-95363703                            | NM_026489:75       | Hormad1       | INSIDE                 | 0.715                                                        | 2.543                          | 488.09             | 1241.42            | 1.819                          | 456.87             | 831.00             |

| ProbeName      | Target position of probe on CpG island microarray | TargetID                | GeneSymbol    | CpG island Description | Ratio of relative methylation (TiO <sub>2</sub> -NP/Vehicle) | Sham group                     |                    |                    | TiO <sub>2</sub> -H group      |                    |                    |
|----------------|---------------------------------------------------|-------------------------|---------------|------------------------|--------------------------------------------------------------|--------------------------------|--------------------|--------------------|--------------------------------|--------------------|--------------------|
|                |                                                   |                         |               |                        |                                                              | Relative methylation (Cy5/Cy3) | Cy3 signal (Input) | Cy5 signal (MeDIP) | Relative methylation (Cy5/Cy3) | Cy3 signal (Input) | Cy5 signal (MeDIP) |
| A_68_P26030504 | chr8:89148137-89148181                            | NM_025827:217           | Lonp2         | INSIDE                 | 0.715                                                        | 0.607                          | 1184.12            | 719.00             | 0.434                          | 906.10             | 393.48             |
| A_68_P21350019 | chr2:76244929-76244973                            | NM_145525:356           | Osbpl6        | INSIDE                 | 0.715                                                        | 0.656                          | 1996.46            | 1309.53            | 0.469                          | 1700.36            | 797.31             |
| A_68_P28936991 | chr13:34254760-34254804                           | NM_001101430:-63        | Psmg4         | PROMOTER               | 0.715                                                        | 0.540                          | 1616.06            | 873.34             | 0.386                          | 1256.10            | 485.04             |
| A_68_P26926722 | chr10:8605525-8605569                             | NM_175155:322           | Sash1         | INSIDE                 | 0.715                                                        | 0.665                          | 1085.48            | 721.72             | 0.475                          | 921.57             | 437.81             |
| A_68_P27355931 | chr10:93296360-93296404                           | NM_183199:2083          | Usp44         | INSIDE                 | 0.715                                                        | 0.709                          | 1390.88            | 986.34             | 0.507                          | 1054.12            | 534.17             |
| A_68_P32672263 | chrX:131023645-131023689                          | ENSMUST00000094550:-242 |               | PROMOTER               | 0.715                                                        | 2.831                          | 6195.62            | 17540.71           | 2.024                          | 2303.41            | 4661.40            |
| A_68_P30367437 | chr15:79435420-79435467                           | NM_010059:71            | Dmc1          | INSIDE                 | 0.714                                                        | 1.988                          | 3791.31            | 7537.37            | 1.420                          | 2684.81            | 3812.95            |
| A_68_P31947675 | chr19:10057125-10057169                           | NM_010239:-46           | Fth1          | PROMOTER               | 0.714                                                        | 0.660                          | 1194.43            | 788.75             | 0.472                          | 948.54             | 447.43             |
| A_68_P20294248 | chr1:64782204-64782248                            | NM_001042659:2098       | Fzd5          | INSIDE                 | 0.714                                                        | 2.378                          | 1569.19            | 3731.69            | 1.699                          | 1269.15            | 2156.04            |
| A_68_P21073107 | chr2:25435061-25435105                            | NM_001005424:537        | Gm996         | INSIDE                 | 0.714                                                        | 0.469                          | 1243.53            | 583.60             | 0.335                          | 793.26             | 265.72             |
| A_68_P23331346 | chr4:135502630-135502674                          | NM_008254:285           | Hmgcl         | INSIDE                 | 0.714                                                        | 0.490                          | 3139.75            | 1538.39            | 0.350                          | 2222.26            | 777.92             |
| A_68_P27262212 | chr10:75931494-75931538                           | NM_019434:-199          | Mcm3ap        | PROMOTER               | 0.714                                                        | 0.514                          | 1658.69            | 852.92             | 0.367                          | 1321.85            | 485.47             |
| A_68_P23351224 | chr4:138902115-138902159                          | NM_023536:6077          | Mrto4         | DOWNSTREAM             | 0.714                                                        | 2.127                          | 1917.64            | 4078.66            | 1.519                          | 1507.45            | 2289.48            |
| A_68_P28950789 | chr13:36826888-36826932                           | NM_153529:-587          | Nrn1          | PROMOTER               | 0.714                                                        | 2.410                          | 1528.35            | 3682.98            | 1.720                          | 1180.81            | 2030.98            |
| A_68_P29055508 | chr13:55614427-55614471                           | NM_001114088:352        | Pdlim7        | INSIDE                 | 0.714                                                        | 0.739                          | 3019.28            | 2230.96            | 0.527                          | 2188.30            | 1154.02            |
| A_68_P29681985 | chr14:67529671-67529715                           | NM_175498:-352          | Pnma2         | PROMOTER               | 0.714                                                        | 0.496                          | 1257.09            | 623.62             | 0.354                          | 960.43             | 340.07             |
| A_68_P26542155 | chr9:57352313-57352357                            | NM_133982:426           | Rpp25         | INSIDE                 | 0.714                                                        | 0.664                          | 905.51             | 601.25             | 0.474                          | 854.63             | 405.05             |
| A_68_P30351143 | chr15:76742152-76742196                           | NM_001168276:13704      | Zfp647        | INSIDE                 | 0.714                                                        | 2.099                          | 1000.32            | 2099.20            | 1.497                          | 829.38             | 1241.98            |
| A_68_P24463221 | chr6:54379963-54380009                            | NR_033635:229           | 9130019P16Rik | INSIDE                 | 0.713                                                        | 0.406                          | 1518.12            | 615.91             | 0.289                          | 1264.40            | 365.66             |
| A_68_P25007186 | chr7:25689296-25689340                            | NM_001130152:-46        | Arhgef1       | PROMOTER               | 0.713                                                        | 0.565                          | 1015.19            | 573.43             | 0.402                          | 860.75             | 346.44             |
| A_68_P31159492 | chr17:35654278-35654322                           | NM_146248:240           | Ceher1        | INSIDE                 | 0.713                                                        | 2.315                          | 1458.32            | 3376.28            | 1.651                          | 1050.44            | 1734.27            |
| A_68_P28992094 | chr13:43880579-43880623                           | NM_009856:125           | Cd83          | INSIDE                 | 0.713                                                        | 0.471                          | 1221.21            | 575.64             | 0.336                          | 1002.21            | 337.06             |
| A_68_P20910359 | chr1:188791248-188791292                          | NM_033077:-24           | D1Pas1        | PROMOTER               | 0.713                                                        | 2.679                          | 1458.98            | 3909.11            | 1.911                          | 1026.85            | 1961.91            |
| A_68_P28186833 | chr11:120657765-120657809                         | NM_026824:-77           | Dus11         | PROMOTER               | 0.713                                                        | 0.588                          | 1619.11            | 952.78             | 0.419                          | 1233.97            | 517.59             |
| A_68_P32213522 | chr19:58530442-58530494                           | NM_010279:-1512         | Gfra1         | PROMOTER               | 0.713                                                        | 0.648                          | 1015.72            | 658.05             | 0.462                          | 704.83             | 325.74             |
| A_68_P27862296 | chr11:63735472-63735516                           | NM_018805:292           | Hs3st3b1      | INSIDE                 | 0.713                                                        | 0.303                          | 2175.38            | 659.19             | 0.216                          | 1670.01            | 361.01             |
| A_68_P22166560 | chr3:57650817-57650861                            | NM_019410:841           | Pfn2          | INSIDE                 | 0.713                                                        | 0.638                          | 2189.75            | 1397.99            | 0.455                          | 1639.74            | 746.47             |
| A_68_P24117606 | chr5:136209349-136209397                          | NM_008898:44289         | Por           | INSIDE                 | 0.713                                                        | 2.103                          | 1276.39            | 2684.66            | 1.500                          | 957.66             | 1436.75            |
| A_68_P27430000 | chr10:107598668-107598712                         | NM_027892:-765          | Ppp1r12a      | PROMOTER               | 0.713                                                        | 0.499                          | 1164.56            | 581.53             | 0.356                          | 943.33             | 335.94             |
| A_68_P24983171 | chr7:17357272-17357316                            | NM_009201:-9400         | Slc1a5        | PROMOTER               | 0.713                                                        | 2.338                          | 1319.10            | 3084.01            | 1.667                          | 1216.77            | 2028.50            |
| A_68_P21901049 | chr2:179777225-179777269                          | NM_178750:59            | Ss18l1        | INSIDE                 | 0.713                                                        | 0.565                          | 2361.06            | 1334.01            | 0.403                          | 1975.80            | 795.55             |
| A_68_P27556190 | chr11:4087152-4087196                             | NM_134023:339           | Tbc1d10a      | INSIDE                 | 0.713                                                        | 0.710                          | 2447.34            | 1738.40            | 0.507                          | 1770.03            | 897.05             |
| A_68_P22162495 | chr3:56941018-56941062                            |                         |               | Unknown                | 0.713                                                        | 3.215                          | 3142.14            | 10101.48           | 2.293                          | 2403.48            | 5512.03            |
| A_68_P28094597 | chr11:105026745-105026789                         | ENSMUST00000118770:1168 |               | INSIDE                 | 0.713                                                        | 3.458                          | 910.67             | 3148.94            | 2.467                          | 809.26             | 1996.10            |
| A_68_P23193446 | chr4:107562348-107562392                          | NM_028754:-133          | 0610037L13Rik | PROMOTER               | 0.712                                                        | 0.677                          | 972.55             | 658.00             | 0.482                          | 829.90             | 399.79             |
| A_68_P28104773 | chr11:106889018-106889062                         | NM_001163473:-496       | 1810010H24Rik | PROMOTER               | 0.712                                                        | 0.633                          | 827.60             | 523.95             | 0.451                          | 702.02             | 316.35             |
| A_68_P30927367 | chr16:85080337-85080381                           | NM_001198823:93594      | App           | INSIDE                 | 0.712                                                        | 2.813                          | 6074.52            | 17087.59           | 2.003                          | 3972.32            | 7954.94            |
| A_68_P25592836 | chr7:149268658-149268702                          | NM_008748:12509         | Dusp8         | INSIDE                 | 0.712                                                        | 2.769                          | 1890.58            | 5235.47            | 1.971                          | 1626.26            | 3204.81            |
| A_68_P24002950 | chr5:114724269-114724313                          | NM_148935:-520          | Foxn4         | PROMOTER               | 0.712                                                        | 0.657                          | 2188.64            | 1438.64            | 0.468                          | 1703.39            | 797.45             |
| A_68_P28563527 | chr12:79327853-79327897                           | NM_145965:233           | Gphn          | INSIDE                 | 0.712                                                        | 0.623                          | 1344.51            | 837.80             | 0.444                          | 1093.59            | 485.52             |
| A_68_P27893905 | chr11:69049315-69049359                           | NM_008192:1188          | Gucy2c        | INSIDE                 | 0.712                                                        | 0.630                          | 1907.68            | 1201.82            | 0.448                          | 1423.52            | 638.17             |
| A_68_P23352996 | chr4:139161037-139161081                          | NM_001205173:30424      | Iffo2         | INSIDE                 | 0.712                                                        | 2.201                          | 2043.27            | 4497.04            | 1.567                          | 1432.48            | 2244.17            |
| A_68_P24129312 | chr5:138635953-138635997                          | NM_177878:433           | Mblac1        | INSIDE                 | 0.712                                                        | 0.538                          | 1349.87            | 725.74             | 0.383                          | 1180.28            | 452.01             |
| A_68_P24810878 | chr6:122824602-122824646                          | NM_026267:50            | Necap1        | INSIDE                 | 0.712                                                        | 0.635                          | 1307.38            | 829.67             | 0.452                          | 1114.25            | 503.20             |
| A_68_P28184541 | chr11:120298583-120298627                         | NM_001195023:410        | Nploc4        | INSIDE                 | 0.712                                                        | 0.621                          | 1931.94            | 1200.43            | 0.442                          | 1547.01            | 684.27             |
| A_68_P25846473 | chr8:49361893-49361937                            | NM_001145937:398130     | Odz3          | INSIDE                 | 0.712                                                        | 2.967                          | 2291.75            | 6798.66            | 2.112                          | 1784.01            | 3768.33            |
| A_68_P22484175 | chr3:122433462-122433506                          | NM_153422:1409          | Pde5a         | INSIDE                 | 0.712                                                        | 0.514                          | 2649.99            | 1363.15            | 0.366                          | 2023.01            | 740.68             |
| A_68_P23575727 | chr5:31262311-31262358                            | NM_016703:400           | Preb          | INSIDE                 | 0.712                                                        | 0.619                          | 2299.07            | 1422.59            | 0.440                          | 1896.79            | 835.08             |
| A_68_P27968803 | chr11:82684639-82684683                           | NM_001164570:-414       | Rfl1          | PROMOTER               | 0.712                                                        | 0.618                          | 5448.62            | 3365.58            | 0.440                          | 4602.42            | 2025.37            |
| A_68_P20464814 | chr1:97564183-97564227                            | NM_009183:-33           | Str8sia4      | PROMOTER               | 0.712                                                        | 0.618                          | 850.43             | 525.57             | 0.440                          | 742.27             | 326.67             |
| A_68_P31162742 | chr17:36282712-36282756                           | NR_033517:772           | 24100171Rik   | INSIDE                 | 0.711                                                        | 0.620                          | 2633.82            | 1632.75            | 0.440                          | 2193.41            | 966.12             |

| ProbeName      | Target position of probe on CpG island microarray | TargetID            | GeneSymbol    | CpG island Description | Ratio of relative methylation (TiO <sub>2</sub> -NP/Vehicle) | Sham group                     |                    |                    | TiO <sub>2</sub> -H group      |                    |                    |
|----------------|---------------------------------------------------|---------------------|---------------|------------------------|--------------------------------------------------------------|--------------------------------|--------------------|--------------------|--------------------------------|--------------------|--------------------|
|                |                                                   |                     |               |                        |                                                              | Relative methylation (Cy5/Cy3) | Cy3 signal (Input) | Cy5 signal (MeDIP) | Relative methylation (Cy5/Cy3) | Cy3 signal (Input) | Cy5 signal (MeDIP) |
| A_68_P27789372 | chr11:50415234-50415278                           | NM_175643-330       | Adams2        | PROMOTER               | 0.711                                                        | 0.413                          | 1367.99            | 565.07             | 0.294                          | 1064.76            | 312.51             |
| A_68_P31605186 | chr18:33099273-33099317                           | NM_009793-600       | Camk4         | INSIDE                 | 0.711                                                        | 0.502                          | 1050.90            | 527.53             | 0.357                          | 803.93             | 286.99             |
| A_68_P23873438 | chr5:89104430-89104474                            | NM_001098476-153    | Grsf1         | INSIDE                 | 0.711                                                        | 0.660                          | 1046.86            | 690.45             | 0.469                          | 959.90             | 449.82             |
| A_68_P28744814 | chr12:112812598-112812642                         | NM_021516-100       | Mark3         | PROMOTER               | 0.711                                                        | 0.568                          | 1933.40            | 1098.24            | 0.404                          | 1822.14            | 735.71             |
| A_68_P21076474 | chr2:25977754-25977798                            | NM_026495-555       | Nacc2         | INSIDE                 | 0.711                                                        | 0.482                          | 1223.14            | 589.39             | 0.343                          | 1018.32            | 348.93             |
| A_68_P31256047 | chr17:56567658-56567702                           | NM_011218-48223     | Ptprs         | INSIDE                 | 0.711                                                        | 2.576                          | 917.82             | 2364.21            | 1.831                          | 869.78             | 1592.46            |
| A_68_P27687433 | chr11:32113469-32113513                           | NM_010117-8803      | Rhbdf1        | INSIDE                 | 0.711                                                        | 2.372                          | 555.89             | 1318.50            | 1.687                          | 611.66             | 1031.93            |
| A_68_P20451969 | chr1:94807947-94807991                            | NM_181405-567       | Rnpepl1       | INSIDE                 | 0.711                                                        | 0.487                          | 1612.45            | 785.94             | 0.347                          | 1299.90            | 450.79             |
| A_68_P25090598 | chr7:52262643-52262687                            | NM_001008422-8955   | Scaf1         | INSIDE                 | 0.711                                                        | 2.315                          | 1076.37            | 2491.80            | 1.646                          | 736.24             | 1212.10            |
| A_68_P28636743 | chr12:93017325-93017369                           | NM_175367-7530      | Ston2         | INSIDE                 | 0.711                                                        | 0.582                          | 1326.52            | 772.47             | 0.414                          | 1096.22            | 453.95             |
| A_68_P29428733 | chr14:17198192-17198236                           | NM_009409-495       | Top2b         | INSIDE                 | 0.711                                                        | 0.542                          | 2327.94            | 1261.60            | 0.385                          | 2086.84            | 803.95             |
| A_68_P23610766 | chr5:37358119-37358163                            | NM_011716-22081     | Wfs1          | INSIDE                 | 0.711                                                        | 3.129                          | 318.68             | 997.08             | 2.224                          | 295.79             | 657.81             |
| A_68_P31295067 | A_68_P31295067                                    |                     |               | Unknown                | 0.711                                                        | 2.299                          | 911.53             | 2096.00            | 1.635                          | 921.75             | 1506.94            |
| A_68_P25953982 | chr8:73300805-73300849                            | NR_029440-66        | 2010320M18Rik | INSIDE                 | 0.710                                                        | 0.445                          | 1277.69            | 568.94             | 0.316                          | 854.23             | 269.92             |
| A_68_P26764411 | chr9:99394814-99394872                            | NM_028768-74476     | Arme8         | INSIDE                 | 0.710                                                        | 2.276                          | 984.81             | 2241.56            | 1.616                          | 796.42             | 1287.35            |
| A_68_P25522112 | chr7:137663073-137663117                          | NM_013799-41        | Ate1          | PROMOTER               | 0.710                                                        | 0.509                          | 1291.47            | 657.23             | 0.361                          | 1101.38            | 397.76             |
| A_68_P26523446 | chr9:53823019-53823063                            | NM_177769-68        | Elmod1        | INSIDE                 | 0.710                                                        | 0.585                          | 1505.49            | 880.88             | 0.415                          | 1282.08            | 532.54             |
| A_68_P28419953 | chr12:50484336-50484380                           | NM_008241-365       | Foxg1         | INSIDE                 | 0.710                                                        | 0.670                          | 1326.52            | 888.86             | 0.476                          | 1162.22            | 552.94             |
| A_68_P29247527 | chr13:97441130-97441174                           | NM_008255-261       | Hmger         | PROMOTER               | 0.710                                                        | 0.588                          | 882.91             | 519.56             | 0.418                          | 703.03             | 293.77             |
| A_68_P21137727 | chr2:35946843-35946887                            | NM_001083126-12716  | Lhx6          | INSIDE                 | 0.710                                                        | 0.569                          | 1883.20            | 1071.58            | 0.404                          | 1449.53            | 585.25             |
| A_68_P32181720 | chr19:53384971-53385016                           | NM_001008542-2      | Mxil          | PROMOTER               | 0.710                                                        | 2.256                          | 2341.61            | 5282.94            | 1.602                          | 1728.57            | 2769.97            |
| A_68_P29479229 | chr14:26513511-26513556                           | NM_134084-122       | Ppif          | PROMOTER               | 0.710                                                        | 0.561                          | 1672.47            | 939.01             | 0.399                          | 1339.00            | 533.93             |
| A_68_P23441764 | chr4:155367553-155367597                          | NM_011341-552       | Sdf4          | INSIDE                 | 0.710                                                        | 0.660                          | 1021.27            | 674.15             | 0.469                          | 985.87             | 462.37             |
| A_68_P27099069 | chr10:42894720-42894764                           | NM_172419-233       | 9030612E09Rik | INSIDE                 | 0.709                                                        | 0.657                          | 1043.47            | 685.50             | 0.465                          | 857.93             | 399.37             |
| A_68_P26864198 | chr9:117950126-117950170                          | NM_001048146-532    | Azi2          | INSIDE                 | 0.709                                                        | 0.631                          | 936.23             | 590.60             | 0.447                          | 737.99             | 330.17             |
| A_68_P23892221 | chr5:92512692-92512736                            | NM_001080794-131    | G3bp2         | PROMOTER               | 0.709                                                        | 0.540                          | 1594.29            | 861.05             | 0.383                          | 1345.16            | 515.22             |
| A_68_P26804351 | chr9:106550055-106550099                          | NM_001160353-8364   | Grm2          | INSIDE                 | 0.709                                                        | 2.347                          | 767.81             | 1801.78            | 1.663                          | 669.91             | 1114.00            |
| A_68_P24038736 | chr5:120890309-120890353                          | NM_008499-8436      | Lhx5          | INSIDE                 | 0.709                                                        | 0.536                          | 1545.14            | 827.51             | 0.379                          | 1185.98            | 450.08             |
| A_68_P28915540 | chr13:30228458-30228502                           | NM_153546-122       | Mboat1        | INSIDE                 | 0.709                                                        | 0.634                          | 1335.97            | 847.46             | 0.450                          | 1174.74            | 528.05             |
| A_68_P31107420 | chr17:26088528-26088572                           | NM_001039038-6674   | Nhlrc4        | PROMOTER               | 0.709                                                        | 0.407                          | 1473.22            | 599.18             | 0.288                          | 1204.05            | 347.14             |
| A_68_P23936338 | chr5:102094059-102094103                          | NM_144955-350       | Nkx6-1        | PROMOTER               | 0.709                                                        | 0.629                          | 978.88             | 615.56             | 0.446                          | 828.51             | 369.14             |
| A_68_P31257078 | chr17:56723736-56723780                           | NM_001029979-248    | Safb2         | INSIDE                 | 0.709                                                        | 0.424                          | 1439.76            | 610.77             | 0.301                          | 1280.40            | 384.88             |
| A_68_P23361255 | chr4:140517166-140517210                          | NM_023374-3         | Sdhd          | INSIDE                 | 0.709                                                        | 0.684                          | 1119.46            | 765.61             | 0.485                          | 877.73             | 425.67             |
| A_68_P21099538 | chr2:29658204-29658248                            | NM_011989-27        | Sle27a4       | INSIDE                 | 0.709                                                        | 0.602                          | 2004.04            | 1206.28            | 0.427                          | 1531.54            | 653.68             |
| A_68_P26154343 | chr8:111480556-111480607                          | NM_007496-242038    | Zfx3          | INSIDE                 | 0.709                                                        | 3.569                          | 8587.49            | 30645.91           | 2.531                          | 5705.29            | 14440.56           |
| A_68_P31016356 | chr17:5342041-5342085                             | NM_001085355-346989 | Arid1b        | INSIDE                 | 0.708                                                        | 2.703                          | 1018.77            | 2753.31            | 1.914                          | 802.26             | 1535.24            |
| A_68_P20433333 | chr1:91889782-91889826                            | NM_139152-21348     | Asb18         | INSIDE                 | 0.708                                                        | 2.175                          | 950.83             | 2068.31            | 1.540                          | 762.64             | 1174.66            |
| A_68_P21094143 | chr2:28771470-28771514                            | NM_019446-449       | Barhl1        | INSIDE                 | 0.708                                                        | 0.647                          | 1707.53            | 1105.43            | 0.458                          | 1493.11            | 684.35             |
| A_68_P24925495 | chr6:145814801-145814845                          | NM_024469-962       | Bhlhe41       | PROMOTER               | 0.708                                                        | 0.369                          | 1855.57            | 683.94             | 0.261                          | 1304.31            | 340.25             |
| A_68_P26323901 | chr9:15432521-15432565                            | NM_181816-165       | Cecdc67       | PROMOTER               | 0.708                                                        | 0.638                          | 2626.85            | 1674.93            | 0.451                          | 1967.95            | 888.02             |
| A_68_P25827833 | chr8:46095432-46095479                            | NM_001081286-59894  | Fat1          | INSIDE                 | 0.708                                                        | 2.546                          | 693.16             | 1764.69            | 1.801                          | 612.56             | 1103.53            |
| A_68_P28080762 | chr11:102527342-102527386                         | NM_001127576-463    | Gm1564        | INSIDE                 | 0.708                                                        | 2.789                          | 865.85             | 2414.50            | 1.973                          | 824.15             | 1626.01            |
| A_68_P20080972 | chr1:21951304-21951348                            | NM_001160139-697    | Kenq5         | INSIDE                 | 0.708                                                        | 0.326                          | 2032.00            | 662.79             | 0.231                          | 1663.56            | 384.07             |
| A_68_P26815589 | chr9:108481413-108481457                          | NM_028944-18497     | P4htm         | INSIDE                 | 0.708                                                        | 0.471                          | 1930.19            | 906.26             | 0.333                          | 1479.69            | 493.00             |
| A_68_P20139010 | chr1:34529780-34529824                            | NM_011206-13212     | Ptpn18        | INSIDE                 | 0.708                                                        | 0.615                          | 2653.67            | 1630.68            | 0.435                          | 2119.68            | 922.68             |
| A_68_P27406628 | chr10:102830256-102830300                         | NM_175328-198       | Sle6a15       | PROMOTER               | 0.708                                                        | 0.703                          | 2118.31            | 1488.99            | 0.497                          | 1682.88            | 837.22             |
| A_68_P26002685 | chr8:83538307-83538351                            | NM_027554-477       | Usp38         | INSIDE                 | 0.708                                                        | 0.601                          | 1416.41            | 851.42             | 0.425                          | 1093.39            | 465.16             |
| A_68_P24957693 | chr7:6930088-6930132                              | NR_036631-737       | Zim3          | PROMOTER               | 0.708                                                        | 2.937                          | 2073.03            | 6089.15            | 2.079                          | 1650.34            | 3430.72            |
| A_68_P22291859 | chr3:84386912-84386956                            | NM_001081093-387    | Arfp1         | PROMOTER               | 0.707                                                        | 0.689                          | 1155.08            | 796.00             | 0.487                          | 842.36             | 410.59             |
| A_68_P21566791 | chr2:118727169-118727213                          | NM_001045523-160    | Bahd1         | PROMOTER               | 0.707                                                        | 0.457                          | 1293.57            | 591.01             | 0.323                          | 1090.81            | 352.32             |
| A_68_P24055345 | chr5:123821191-123821247                          | NM_029850-26762     | Bcl7a         | INSIDE                 | 0.707                                                        | 2.813                          | 929.98             | 2615.85            | 1.988                          | 734.08             | 1459.33            |

| ProbeName       | Target position of probe on CpG island microarray | TargetID                | GeneSymbol    | CpG island Description | Ratio of relative methylation (TiO <sub>2</sub> -NP/Vehicle) | Sham group                     |                    |                    | TiO <sub>2</sub> -H group      |                    |                    |
|-----------------|---------------------------------------------------|-------------------------|---------------|------------------------|--------------------------------------------------------------|--------------------------------|--------------------|--------------------|--------------------------------|--------------------|--------------------|
|                 |                                                   |                         |               |                        |                                                              | Relative methylation (Cy5/Cy3) | Cy3 signal (Input) | Cy5 signal (MeDIP) | Relative methylation (Cy5/Cy3) | Cy3 signal (Input) | Cy5 signal (MeDIP) |
| A_68_P22412462  | chr3:108209734-108209778                          | NM_001004177:8656       | Celsr2        | INSIDE                 | 0.707                                                        | 2.426                          | 441.17             | 1070.49            | 1.716                          | 388.28             | 666.35             |
| A_68_P225609690 | chr7:152047867-152047911                          | NM_010202:598           | Egf4          | INSIDE                 | 0.707                                                        | 0.527                          | 1410.30            | 743.14             | 0.373                          | 1120.01            | 417.54             |
| A_68_P21338893  | chr2:74536131-74536175                            | NM_013555:333           | Hoxd9         | INSIDE                 | 0.707                                                        | 0.421                          | 1729.65            | 727.92             | 0.297                          | 1308.52            | 389.19             |
| A_68_P32028426  | chr19:25311621-25311665                           | NM_181404:-49           | Kank1         | PROMOTER               | 0.707                                                        | 0.475                          | 1372.93            | 652.63             | 0.336                          | 1089.42            | 366.28             |
| A_68_P23972005  | chr5:108877904-108877948                          | NM_172883:-16           | Mfsd7a        | PROMOTER               | 0.707                                                        | 0.670                          | 1178.24            | 789.07             | 0.474                          | 922.86             | 437.06             |
| A_68_P22860679  | chr4:41082140-41082184                            | NM_026275:-891          | Ube2r2        | PROMOTER               | 0.707                                                        | 0.383                          | 1381.99            | 528.77             | 0.271                          | 1077.74            | 291.54             |
| A_68_P32403977  | chrX:55292060-55292104                            | NM_009575:8278          | Zic3          | DOWNSTREAM             | 0.707                                                        | 2.581                          | 1977.52            | 5104.11            | 1.826                          | 1094.75            | 1998.59            |
| A_68_P31932458  | chr19:6061153-6061197                             | NM_013859:-32           | Znhit2-ps     | PROMOTER               | 0.707                                                        | 0.425                          | 1965.45            | 834.90             | 0.300                          | 1569.84            | 471.60             |
| A_68_P26430751  | chr9:37267846-37267890                            |                         |               | Unknown                | 0.707                                                        | 0.472                          | 3564.97            | 1682.51            | 0.334                          | 2419.55            | 807.70             |
| A_68_P32364026  | chrX:45694076-45694120                            | NM_178782:-436          | Bcor1         | PROMOTER               | 0.706                                                        | 2.613                          | 988.48             | 2583.00            | 1.845                          | 455.76             | 840.68             |
| A_68_P28944868  | chr13:35832908-35832952                           | NM_001123386:-340       | Cdyl          | PROMOTER               | 0.706                                                        | 0.453                          | 1430.11            | 647.79             | 0.320                          | 1155.12            | 369.23             |
| A_68_P27190984  | chr10:62892485-62892529                           | NM_177612:-339          | Ctnna3        | PROMOTER               | 0.706                                                        | 0.368                          | 1991.76            | 732.47             | 0.260                          | 1506.87            | 391.44             |
| A_68_P25416681  | chr7:118172726-118172772                          | NM_009431:284           | Ctr9          | INSIDE                 | 0.706                                                        | 0.734                          | 2710.97            | 1989.23            | 0.518                          | 2001.34            | 1036.56            |
| A_68_P27093486  | chr10:41917452-41917496                           | NM_019740:79074         | Foxo3         | INSIDE                 | 0.706                                                        | 2.255                          | 2589.70            | 5838.62            | 1.591                          | 1851.55            | 2945.22            |
| A_68_P27288384  | chr10:80720348-80720392                           | NM_010768:81            | Matk          | INSIDE                 | 0.706                                                        | 0.617                          | 1763.43            | 1088.65            | 0.436                          | 1585.56            | 691.10             |
| A_68_P31626419  | chr18:37128747-37128791                           | NM_009957:-4809         | Pcdha7        | PROMOTER               | 0.706                                                        | 2.080                          | 1125.06            | 2340.46            | 1.469                          | 798.92             | 1173.99            |
| A_68_P26464016  | chr9:43611710-43611754                            | NM_021424:59074         | Pvrl1         | INSIDE                 | 0.706                                                        | 4.179                          | 1853.83            | 7747.84            | 2.952                          | 1233.76            | 3642.35            |
| A_68_P29194040  | chr13:85429148-85429192                           | NM_145452:-79           | Rasa1         | PROMOTER               | 0.706                                                        | 0.475                          | 2358.92            | 1120.54            | 0.335                          | 2012.07            | 674.78             |
| A_68_P26348417  | chr9:21490581-21490625                            | NM_001174078:69990      | Smarca4       | INSIDE                 | 0.706                                                        | 3.773                          | 3313.48            | 12502.17           | 2.665                          | 2400.34            | 6396.96            |
| A_68_P28160199  | chr11:116442326-116442370                         | NM_173755:413           | Ube2o         | INSIDE                 | 0.706                                                        | 0.540                          | 1960.53            | 1058.85            | 0.381                          | 1720.38            | 655.63             |
| A_68_P20350709  | chr1:74863629-74863673                            |                         |               | Unknown                | 0.706                                                        | 0.609                          | 1135.90            | 691.46             | 0.430                          | 865.85             | 372.34             |
| A_68_P21761084  | chr2:154375582-154375626                          | NM_029305:965           | 1700003F12Rik | INSIDE                 | 0.705                                                        | 0.439                          | 1195.37            | 525.03             | 0.310                          | 1069.38            | 331.19             |
| A_68_P32710891  | chrX:139401598-139401642                          | NM_019496:-349          | Ammecr1       | PROMOTER               | 0.705                                                        | 5.326                          | 1461.29            | 7782.83            | 3.755                          | 918.83             | 3450.35            |
| A_68_P21617373  | chr2:127952615-127952659                          | NM_009754:863           | Bel2l11       | INSIDE                 | 0.705                                                        | 0.463                          | 1378.18            | 638.50             | 0.327                          | 1135.63            | 370.82             |
| A_68_P23767824  | chr5:67818279-67818323                            | NM_001164806:738        | Bend4         | INSIDE                 | 0.705                                                        | 0.674                          | 1035.32            | 697.77             | 0.475                          | 1043.75            | 495.83             |
| A_68_P24605097  | chr6:85401585-85401629                            | NM_007638:108           | Cet7          | INSIDE                 | 0.705                                                        | 0.477                          | 1988.85            | 948.60             | 0.336                          | 1643.56            | 552.99             |
| A_68_P31473578  | chr18:6490125-6490169                             | NM_027497:708           | Epc1          | INSIDE                 | 0.705                                                        | 0.519                          | 1314.68            | 681.87             | 0.366                          | 1121.59            | 410.10             |
| A_68_P21641077  | chr2:132403236-132403280                          | NM_001042671:726        | Gpcpd1        | INSIDE                 | 0.705                                                        | 0.421                          | 1403.50            | 590.25             | 0.297                          | 1103.26            | 327.15             |
| A_68_P23349534  | chr4:138631170-138631214                          | NM_021358:-488          | Htr6          | PROMOTER               | 0.705                                                        | 0.562                          | 1012.93            | 568.86             | 0.396                          | 906.90             | 358.91             |
| A_68_P24660677  | chr6:95068035-95068079                            | NM_001008785:157        | Kbtbd8        | INSIDE                 | 0.705                                                        | 0.621                          | 4376.85            | 2717.60            | 0.438                          | 3307.18            | 1447.31            |
| A_68_P27056939  | chr10:34138119-34138163                           | NM_176968:194           | Nt5dc1        | INSIDE                 | 0.705                                                        | 0.545                          | 1401.00            | 763.33             | 0.384                          | 1074.94            | 412.86             |
| A_68_P31652785  | chr18:42110533-42110577                           | NM_029942:294           | Prelid2       | INSIDE                 | 0.705                                                        | 0.569                          | 1503.90            | 855.83             | 0.401                          | 1157.17            | 464.50             |
| A_68_P31542485  | chr18:21159693-21159737                           | NM_019706:-127          | Rnf138        | PROMOTER               | 0.705                                                        | 0.692                          | 1419.40            | 982.49             | 0.488                          | 1211.26            | 591.07             |
| A_68_P22615130  | chr3:146183915-146183959                          | NM_027371:451           | Rpl1          | INSIDE                 | 0.705                                                        | 0.636                          | 978.58             | 622.39             | 0.448                          | 778.91             | 349.26             |
| A_68_P28086213  | chr11:103511657-103511703                         | NM_001033212:858        | Rprml         | INSIDE                 | 0.705                                                        | 2.321                          | 2463.95            | 5718.22            | 1.636                          | 1628.59            | 2663.60            |
| A_68_P30572150  | chr16:17132494-17132538                           | NM_022324:-40           | Sdf2l1        | PROMOTER               | 0.705                                                        | 0.513                          | 1040.52            | 533.75             | 0.362                          | 866.93             | 313.46             |
| A_68_P30656973  | chr16:33251896-33251940                           | NM_080557:377           | Snx4          | INSIDE                 | 0.705                                                        | 0.542                          | 1392.96            | 754.76             | 0.382                          | 1145.61            | 437.81             |
| A_68_P27288946  | chr10:80795962-80796006                           | NM_009325:4509          | Tbxa2r        | INSIDE                 | 0.705                                                        | 3.265                          | 4109.92            | 13416.84           | 2.300                          | 2783.01            | 6401.65            |
| A_68_P24248064  | chr6:13557588-13557632                            | NM_028990:453           | Tmem168       | INSIDE                 | 0.705                                                        | 0.606                          | 1660.13            | 1005.53            | 0.427                          | 1508.38            | 644.49             |
| A_68_P24428348  | chr6:48569845-48569889                            | NM_173429:6688          | Zfp775        | INSIDE                 | 0.705                                                        | 2.657                          | 1149.03            | 3053.42            | 1.874                          | 969.29             | 1815.99            |
| A_68_P22148831  | chr3:54437065-54437110                            | ENSMUST00000172420:1727 |               | INSIDE                 | 0.705                                                        | 2.552                          | 919.53             | 2346.93            | 1.801                          | 772.42             | 1390.82            |
| A_68_P22410428  | chr3:107889363-107889407                          | NM_028779:161           | Ampd2         | INSIDE                 | 0.704                                                        | 0.579                          | 2048.07            | 1184.83            | 0.407                          | 1531.89            | 623.51             |
| A_68_P32536865  | chrX:91226290-91226336                            | NR_028320:12318         | AU015836      | DOWNSTREAM             | 0.704                                                        | 2.421                          | 1133.27            | 2743.12            | 1.705                          | 495.40             | 844.66             |
| A_68_P29122631  | chr13:70776356-70776400                           | NM_144837:134           | BC018507      | INSIDE                 | 0.704                                                        | 0.428                          | 1223.55            | 523.45             | 0.301                          | 917.19             | 276.05             |
| A_68_P20350881  | chr1:74902348-74902392                            | NM_009872:768           | Cdk5r2        | INSIDE                 | 0.704                                                        | 0.562                          | 2402.43            | 1349.55            | 0.395                          | 1842.81            | 728.39             |
| A_68_P26785470  | chr9:103267147-103267191                          | NM_001134427:141        | Cdv3          | INSIDE                 | 0.704                                                        | 0.492                          | 1823.41            | 896.73             | 0.346                          | 1560.83            | 540.43             |
| A_68_P20641220  | chr1:137625770-137625814                          | NM_007791:19            | Csrp1         | INSIDE                 | 0.704                                                        | 0.698                          | 3202.68            | 2235.30            | 0.491                          | 2434.53            | 1195.96            |
| A_68_P25268784  | chr7:87948360-87948404                            | NM_016721:-165          | Iqgap1        | PROMOTER               | 0.704                                                        | 0.610                          | 1421.18            | 866.94             | 0.430                          | 1117.54            | 480.14             |
| A_68_P30359966  | chr15:78267556-78267601                           | NM_001081367:8521       | Kctd17        | INSIDE                 | 0.704                                                        | 2.087                          | 2693.88            | 5621.90            | 1.469                          | 1819.10            | 2672.59            |
| A_68_P22220265  | chr3:69120566-69120610                            | NM_178726:-251          | Ppm1l         | PROMOTER               | 0.704                                                        | 0.695                          | 2022.59            | 1404.80            | 0.489                          | 1567.48            | 766.63             |
| A_68_P27835785  | chr11:59063460-59063505                           | NM_009522:40771         | Wnt3a         | INSIDE                 | 0.704                                                        | 3.007                          | 316.13             | 950.51             | 2.116                          | 318.97             | 674.93             |

| ProbeName      | Target position of probe on CpG island microarray | TargetID               | GeneSymbol    | CpG island Description | Ratio of relative methylation (TiO <sub>2</sub> -NP/Vehicle) | Sham group                     |                    |                    | TiO <sub>2</sub> -H group      |                    |                    |
|----------------|---------------------------------------------------|------------------------|---------------|------------------------|--------------------------------------------------------------|--------------------------------|--------------------|--------------------|--------------------------------|--------------------|--------------------|
|                |                                                   |                        |               |                        |                                                              | Relative methylation (Cy5/Cy3) | Cy3 signal (Input) | Cy5 signal (MeDIP) | Relative methylation (Cy5/Cy3) | Cy3 signal (Input) | Cy5 signal (MeDIP) |
| A_68_P26082677 | chr8:97851977-97852021                            | NM_024467:3852         | Zfp319        | INSIDE                 | 0.704                                                        | 2.414                          | 638.24             | 1540.71            | 1.699                          | 565.76             | 961.02             |
| A_68_P28736924 | chr12:111427791-111427835                         | AK044800:2027          |               | INSIDE                 | 0.704                                                        | 0.618                          | 976.46             | 603.26             | 0.435                          | 870.84             | 378.55             |
| A_68_P25786362 | chr8:37612307-37612351                            | AK076528:2179          |               | DOWNSTREAM             | 0.704                                                        | 0.543                          | 987.44             | 535.82             | 0.382                          | 832.29             | 318.13             |
| A_68_P22478798 | chr3:121517570-121517614                          | NM_008991:541          | Abcd3         | INSIDE                 | 0.703                                                        | 0.485                          | 1106.14            | 536.74             | 0.341                          | 849.26             | 289.80             |
| A_68_P22510090 | chr3:127398655-127398699                          | NM_027808:84769        | Alpk1         | INSIDE                 | 0.703                                                        | 0.463                          | 1403.07            | 649.66             | 0.325                          | 1221.11            | 397.42             |
| A_68_P24872960 | chr6:136467629-136467673                          | NM_019426:279          | Atf7ip        | INSIDE                 | 0.703                                                        | 0.685                          | 1940.08            | 1328.57            | 0.482                          | 1677.66            | 807.82             |
| A_68_P32260372 | chrX:11668383-11668427                            | NM_001168321:69077     | Beor          | INSIDE                 | 0.703                                                        | 0.712                          | 2248.46            | 1601.15            | 0.501                          | 1061.34            | 531.24             |
| A_68_P30540369 | chr16:995886-995933                               | NM_008170:-3283        | Grin2a        | PROMOTER               | 0.703                                                        | 0.647                          | 787.14             | 509.42             | 0.455                          | 713.83             | 324.59             |
| A_68_P21750890 | chr2:152560836-152560880                          | NM_010495:-1151        | Id1           | PROMOTER               | 0.703                                                        | 0.704                          | 1884.20            | 1326.14            | 0.495                          | 1496.02            | 740.64             |
| A_68_P26537267 | chr9:56468392-56468441                            | NM_181074:64644        | Lingo1        | INSIDE                 | 0.703                                                        | 3.880                          | 401.81             | 1558.89            | 2.727                          | 316.11             | 862.16             |
| A_68_P22370683 | chr3:100490054-100490098                          | NM_010763:-680         | Man1a2        | PROMOTER               | 0.703                                                        | 0.631                          | 1675.24            | 1057.85            | 0.444                          | 1445.14            | 641.84             |
| A_68_P20940228 | chr1:193645578-193645622                          | NM_010892:249          | Nek2          | INSIDE                 | 0.703                                                        | 0.583                          | 937.32             | 546.29             | 0.410                          | 689.34             | 282.36             |
| A_68_P25367281 | chr7:107520218-107520262                          | NM_028292:166          | Ppme1         | INSIDE                 | 0.703                                                        | 0.681                          | 1142.22            | 777.31             | 0.478                          | 1040.68            | 497.80             |
| A_68_P22382660 | chr3:102539302-102539346                          | NM_027533:632          | Tspan2        | INSIDE                 | 0.703                                                        | 0.720                          | 2166.37            | 1560.46            | 0.506                          | 1716.05            | 869.09             |
| A_68_P23547925 | chr5:25036093-25036137                            | NR_027388:279          | 1700096K18Rik | INSIDE                 | 0.702                                                        | 0.573                          | 1709.67            | 979.34             | 0.402                          | 1347.77            | 541.74             |
| A_68_P23441291 | chr4:155266628-155266672                          | NM_207223:667          | Acap3         | INSIDE                 | 0.702                                                        | 0.449                          | 1196.21            | 537.65             | 0.315                          | 949.75             | 299.45             |
| A_68_P30822063 | chr16:64851412-64851456                           | NM_178647:-476         | Cggbp1        | PROMOTER               | 0.702                                                        | 0.551                          | 1489.22            | 821.12             | 0.387                          | 1289.20            | 499.24             |
| A_68_P26129634 | chr8:107165624-107165668                          | NM_026753:-18          | Fam96b        | PROMOTER               | 0.702                                                        | 0.575                          | 1062.66            | 611.08             | 0.403                          | 776.41             | 313.24             |
| A_68_P22522352 | chr3:129534495-129534539                          | NM_026578:-202         | Gar1          | DIVERGENT_PROMOTER     | 0.702                                                        | 0.488                          | 1372.49            | 670.45             | 0.343                          | 1104.54            | 378.62             |
| A_68_P24135225 | chr5:139856460-139856504                          | NM_030258:-138         | Gpr146        | PROMOTER               | 0.702                                                        | 0.683                          | 1453.06            | 992.69             | 0.479                          | 1217.99            | 583.91             |
| A_68_P25044870 | chr7:35440785-35440829                            | NM_146188:-2946        | Ketd15        | PROMOTER               | 0.702                                                        | 0.645                          | 1091.76            | 704.66             | 0.453                          | 903.45             | 409.20             |
| A_68_P32559511 | chrX:97624538-97624586                            | NM_001163191:211       | Otud6a        | INSIDE                 | 0.702                                                        | 2.971                          | 697.79             | 2072.93            | 2.087                          | 300.63             | 627.32             |
| A_68_P25173479 | chr7:70902673-70902717                            | NM_130880:313037       | Otud7a        | INSIDE                 | 0.702                                                        | 0.377                          | 1408.50            | 530.75             | 0.265                          | 1136.56            | 300.75             |
| A_68_P25357342 | chr7:105851579-105851623                          | NM_028410:-272         | Prkrir        | PROMOTER               | 0.702                                                        | 0.510                          | 2049.24            | 1044.85            | 0.358                          | 1741.61            | 623.76             |
| A_68_P28328449 | chr12:31596572-31596616                           | NM_013709:61           | Sh3yl1        | INSIDE                 | 0.702                                                        | 0.645                          | 1047.94            | 675.90             | 0.452                          | 881.03             | 398.64             |
| A_68_P26398843 | chr9:30939371-30939415                            | NM_011176:-8           | St14          | PROMOTER               | 0.702                                                        | 0.670                          | 972.07             | 650.89             | 0.470                          | 906.49             | 426.12             |
| A_68_P26238821 | chr8:125778775-125778819                          | NM_020497:702          | Zfp276        | INSIDE                 | 0.702                                                        | 0.557                          | 1448.04            | 805.93             | 0.391                          | 1109.20            | 433.42             |
| A_68_P22931102 | chr4:54958062-54958106                            | NM_172867:-2732        | Zfp462        | PROMOTER               | 0.702                                                        | 0.560                          | 1172.08            | 656.62             | 0.393                          | 930.91             | 365.84             |
| A_68_P25447475 | chr7:123451082-123451126                          | ENSMUST00000106605:786 |               | INSIDE                 | 0.702                                                        | 0.698                          | 2082.21            | 1453.44            | 0.490                          | 2002.29            | 981.02             |
| A_68_P28314430 | chr12:29360205-29360249                           | NM_134052:155          | Adi1          | INSIDE                 | 0.701                                                        | 0.425                          | 1311.42            | 557.70             | 0.298                          | 1116.03            | 332.47             |
| A_68_P30459964 | chr15:95621741-95621785                           | NM_175344:489          | Ano6          | INSIDE                 | 0.701                                                        | 0.677                          | 1313.87            | 888.98             | 0.474                          | 1199.40            | 568.91             |
| A_68_P32573913 | chrX:100818988-100819035                          | NR_028381:82           | B230206F22Rik | INSIDE                 | 0.701                                                        | 0.624                          | 1682.10            | 1050.16            | 0.438                          | 598.45             | 262.06             |
| A_68_P26808318 | chr9:107302722-107302766                          | NM_001174047:534       | Cacna2d2      | INSIDE                 | 0.701                                                        | 0.590                          | 1616.89            | 953.23             | 0.413                          | 1133.35            | 468.19             |
| A_68_P24325870 | chr6:29298179-29298223                            | NM_007594:82           | Calu          | INSIDE                 | 0.701                                                        | 0.496                          | 1716.18            | 852.06             | 0.348                          | 1355.27            | 471.43             |
| A_68_P21099938 | chr2:29725051-29725095                            | NM_207298:59           | Ceream        | INSIDE                 | 0.701                                                        | 0.714                          | 2528.96            | 1804.80            | 0.500                          | 1963.50            | 982.72             |
| A_68_P23203735 | chr4:109650901-109650945                          | NM_172296:293          | Dmrta2        | INSIDE                 | 0.701                                                        | 0.704                          | 1659.33            | 1168.34            | 0.493                          | 1439.06            | 709.83             |
| A_68_P26166325 | chr8:113580098-113580142                          | NM_028274:-118         | Exosc6        | PROMOTER               | 0.701                                                        | 0.506                          | 1081.80            | 547.31             | 0.355                          | 1016.24            | 360.49             |
| A_68_P25531563 | chr7:139158857-139158901                          | NM_173410:736          | Gpr26         | INSIDE                 | 0.701                                                        | 0.690                          | 1103.51            | 761.95             | 0.484                          | 1026.91            | 496.72             |
| A_68_P31156856 | chr17:35115532-35115587                           | NM_013558:5912         | Hspa11        | INSIDE                 | 0.701                                                        | 4.215                          | 2744.03            | 11565.93           | 2.954                          | 1836.22            | 5423.27            |
| A_68_P25042627 | chr7:34981438-34981482                            | NM_026549:206          | Pdcd2l        | INSIDE                 | 0.701                                                        | 0.621                          | 911.56             | 566.04             | 0.435                          | 797.34             | 346.83             |
| A_68_P25050417 | chr7:36432045-36432089                            | NM_019746:435          | Pdcd5         | INSIDE                 | 0.701                                                        | 0.683                          | 1031.15            | 704.23             | 0.479                          | 871.40             | 417.05             |
| A_68_P30343543 | chr15:75543756-75543800                           | NM_001163465:9061      | Rhpn1         | INSIDE                 | 0.701                                                        | 2.812                          | 1548.75            | 4355.21            | 1.970                          | 1207.13            | 2377.98            |
| A_68_P26631313 | chr9:72961503-72961547                            | NM_198609:249          | Rsl24d1       | INSIDE                 | 0.701                                                        | 0.523                          | 981.58             | 513.09             | 0.366                          | 766.38             | 280.70             |
| A_68_P22353009 | chr3:96962896-96962945                            | NM_019800:221          | Acp6          | INSIDE                 | 0.700                                                        | 0.686                          | 1135.65            | 778.80             | 0.480                          | 1031.05            | 495.18             |
| A_68_P31838822 | chr18:75856443-75856487                           | NM_201354:886          | Ctif          | INSIDE                 | 0.700                                                        | 0.382                          | 1559.24            | 596.27             | 0.268                          | 1354.11            | 362.26             |
| A_68_P28525536 | chr12:72418903-72418947                           | NM_001190466:8054      | Daet1         | INSIDE                 | 0.700                                                        | 2.259                          | 707.69             | 1598.35            | 1.580                          | 713.25             | 1127.14            |
| A_68_P26468514 | chr9:44413289-44413333                            | NM_001110826:336       | Ddx6          | INSIDE                 | 0.700                                                        | 0.436                          | 2568.01            | 1119.06            | 0.305                          | 2142.02            | 653.36             |
| A_68_P26584119 | chr9:64659071-64659115                            | NM_001162917:275       | Dennd4a       | INSIDE                 | 0.700                                                        | 0.406                          | 1913.08            | 776.95             | 0.284                          | 1408.73            | 400.31             |
| A_68_P25051002 | chr7:36539157-36539201                            | NM_178704:295          | Dpy19l3       | INSIDE                 | 0.700                                                        | 0.451                          | 4388.61            | 1978.98            | 0.316                          | 3664.63            | 1157.23            |
| A_68_P26135494 | chr8:108228360-108228404                          | NM_198299:3686         | E130303B06Rik | INSIDE                 | 0.700                                                        | 2.177                          | 1028.01            | 2237.77            | 1.525                          | 814.34             | 1241.57            |
| A_68_P31928725 | chr19:5448265-5448309                             | NM_010235:589          | Fosl1         | INSIDE                 | 0.700                                                        | 0.509                          | 2548.84            | 1298.38            | 0.356                          | 1856.84            | 661.82             |

| ProbeName      | Target position of probe on CpG island microarray | TargetID           | GeneSymbol    | CpG island Description | Ratio of relative methylation (TiO <sub>2</sub> -NP/Vehicle) | Sham group                     |                    |                    | TiO <sub>2</sub> -H group      |                    |                    |
|----------------|---------------------------------------------------|--------------------|---------------|------------------------|--------------------------------------------------------------|--------------------------------|--------------------|--------------------|--------------------------------|--------------------|--------------------|
|                |                                                   |                    |               |                        |                                                              | Relative methylation (Cy5/Cy3) | Cy3 signal (Input) | Cy5 signal (MeDIP) | Relative methylation (Cy5/Cy3) | Cy3 signal (Input) | Cy5 signal (MeDIP) |
| A_68_P28463197 | chr12:58644329-58644373                           | NM_008259:2758     | Foxa1         | INSIDE                 | 0.700                                                        | 0.602                          | 2470.64            | 1486.82            | 0.421                          | 1927.60            | 812.46             |
| A_68_P28748141 | chr12:113384025-113384069                         | NM_001097621:-372  | Kif26a        | PROMOTER               | 0.700                                                        | 0.610                          | 2136.05            | 1302.14            | 0.427                          | 1469.28            | 627.02             |
| A_68_P28594552 | chr12:85112991-85113035                           | NM_001205343:8429  | Papln         | INSIDE                 | 0.700                                                        | 1.937                          | 3397.39            | 6579.09            | 1.356                          | 2820.17            | 3824.58            |
| A_68_P23468798 | chr5:8623006-8623050                              | NM_198620:-76      | Runde3b       | PROMOTER               | 0.700                                                        | 0.348                          | 2390.32            | 831.95             | 0.244                          | 1803.85            | 439.51             |
| A_68_P26533462 | chr9:55786156-55786200                            | NM_001081341:-256  | Scaper        | PROMOTER               | 0.700                                                        | 0.673                          | 986.07             | 663.68             | 0.471                          | 829.85             | 391.20             |
| A_68_P31619488 | chr18:35821775-35821819                           | NM_029485:44       | Spata24       | INSIDE                 | 0.700                                                        | 0.714                          | 2155.34            | 1539.01            | 0.500                          | 1726.88            | 863.49             |
| A_68_P28100096 | chr11:106054873-106054917                         | NM_028126:-32      | Strada        | PROMOTER               | 0.700                                                        | 0.433                          | 2224.64            | 962.69             | 0.303                          | 1592.87            | 482.54             |
| A_68_P23974103 | chr5:109204294-109204338                          | NM_026109:20066    | Tmed11        | DOWNSTREAM             | 0.700                                                        | 4.515                          | 459.36             | 2073.86            | 3.162                          | 437.15             | 1382.30            |
| A_68_P25009660 | chr7:26100723-26100767                            | NM_183311:9618     | Tmem145       | INSIDE                 | 0.700                                                        | 0.554                          | 2427.52            | 1345.66            | 0.388                          | 2012.01            | 780.68             |
| A_68_P21751499 | chr2:152673945-152673989                          | NM_001141975:267   | Tpx2          | INSIDE                 | 0.700                                                        | 0.637                          | 1234.55            | 786.11             | 0.446                          | 1060.79            | 472.97             |
| A_68_P25358212 | chr7:105987224-105987268                          | NM_009519:-108     | Wnt1          | PROMOTER               | 0.700                                                        | 0.481                          | 1290.54            | 620.35             | 0.336                          | 961.61             | 323.57             |
| A_68_P21105304 | chr2:30656752-30656796                            | NM_198000:453      | 1700001O22Rik | INSIDE                 | 0.699                                                        | 2.034                          | 3417.32            | 6952.47            | 1.423                          | 2537.40            | 3609.48            |
| A_68_P24045787 | chr5:122110769-122110813                          | NM_028227:196      | Brap          | INSIDE                 | 0.699                                                        | 0.512                          | 1200.60            | 614.55             | 0.358                          | 1045.49            | 374.08             |
| A_68_P27308087 | chr10:84849473-84849517                           | NM_028709:-64      | Btbd11        | PROMOTER               | 0.699                                                        | 0.626                          | 2521.06            | 1578.55            | 0.438                          | 2031.06            | 888.66             |
| A_68_P24791292 | chr6:119058938-119058982                          | NM_001159533:-753  | Caena1c       | PROMOTER               | 0.699                                                        | 0.672                          | 1223.48            | 822.05             | 0.469                          | 936.33             | 439.55             |
| A_68_P25092033 | chr7:52496504-52496548                            | NM_007645:-2317    | Cd37          | PROMOTER               | 0.699                                                        | 0.571                          | 1083.78            | 618.92             | 0.399                          | 849.17             | 339.21             |
| A_68_P23611444 | chr5:37482900-37482944                            | NM_178394:40827    | Jakmip1       | INSIDE                 | 0.699                                                        | 0.647                          | 1581.10            | 1023.65            | 0.453                          | 1275.07            | 577.27             |
| A_68_P24758107 | chr6:113145188-113145232                          | NM_177763:168      | Lhfp14        | INSIDE                 | 0.699                                                        | 0.664                          | 1299.63            | 863.19             | 0.465                          | 1138.19            | 528.70             |
| A_68_P21037815 | chr2:17950260-17950305                            | NR_028378:1407     | LOC100034739  | INSIDE                 | 0.699                                                        | 0.583                          | 1657.92            | 967.06             | 0.408                          | 1314.01            | 535.98             |
| A_68_P23956959 | chr5:106161218-106161263                          | NM_178701:31412    | Lrrc8d        | INSIDE                 | 0.699                                                        | 0.439                          | 1295.35            | 569.20             | 0.307                          | 1090.22            | 279.73             |
| A_68_P31259248 | chr17:57074657-57074701                           | NM_022328:133      | Mlft1         | INSIDE                 | 0.699                                                        | 0.437                          | 2129.07            | 931.07             | 0.306                          | 1704.40            | 520.95             |
| A_68_P22289191 | chr3:83959735-83959779                            | NM_029797:-48      | Mnd1          | PROMOTER               | 0.699                                                        | 15.833                         | 5893.51            | 93312.28           | 11.064                         | 4650.31            | 51449.07           |
| A_68_P21775758 | chr2:157030220-157030264                          | NM_011249:28       | Rbl1          | INSIDE                 | 0.699                                                        | 0.584                          | 1486.33            | 868.26             | 0.408                          | 1190.57            | 486.25             |
| A_68_P20353661 | chr1:75381740-75381784                            | NM_001085370:-422  | Speg          | PROMOTER               | 0.699                                                        | 2.347                          | 5763.08            | 13527.64           | 1.642                          | 3864.58            | 6343.90            |
| A_68_P20620970 | chr1:134257180-134257224                          | NM_178874:30656    | Tmcc2         | INSIDE                 | 0.699                                                        | 2.433                          | 2472.56            | 6014.97            | 1.702                          | 1808.51            | 3077.28            |
| A_68_P27798800 | chr11:52174442-52174486                           | NM_011694:-152     | Vdac1         | PROMOTER               | 0.699                                                        | 0.586                          | 1619.19            | 948.35             | 0.409                          | 1319.10            | 540.04             |
| A_68_P21219430 | chr2:52280336-52280380                            | NM_182994:36       | Arl5a         | INSIDE                 | 0.698                                                        | 3.327                          | 384.91             | 1280.58            | 2.321                          | 377.39             | 875.86             |
| A_68_P27643063 | chr11:22760679-22760723                           | NM_001169114:-364  | B3gnt2        | PROMOTER               | 0.698                                                        | 0.655                          | 2078.47            | 1360.83            | 0.457                          | 1785.90            | 816.37             |
| A_68_P30480363 | chr15:99301136-99301180                           | NM_029236:4003     | Bcdin3d       | INSIDE                 | 0.698                                                        | 2.669                          | 509.18             | 1359.13            | 1.863                          | 479.80             | 893.70             |
| A_68_P22338533 | chr3:94167492-94167536                            | NM_001136117:1149  | C2cd4d        | INSIDE                 | 0.698                                                        | 0.518                          | 1296.63            | 671.80             | 0.361                          | 1126.38            | 407.18             |
| A_68_P26224704 | chr8:123652972-123653016                          | NM_008024:1410     | Fox11         | INSIDE                 | 0.698                                                        | 0.653                          | 1266.48            | 827.18             | 0.456                          | 1004.31            | 458.13             |
| A_68_P31614302 | chr18:34879775-34879820                           | NM_010280:244      | Gfra3         | INSIDE                 | 0.698                                                        | 0.592                          | 1106.57            | 654.86             | 0.413                          | 811.33             | 335.36             |
| A_68_P21395215 | chr2:84726754-84726798                            | NM_199223:73       | Rtn4rl2       | INSIDE                 | 0.698                                                        | 0.518                          | 1288.11            | 666.64             | 0.361                          | 1073.81            | 387.98             |
| A_68_P25962574 | chr8:75247287-75247331                            | NM_001113248:122   | Sin3b         | INSIDE                 | 0.698                                                        | 0.374                          | 3283.74            | 1228.96            | 0.261                          | 2456.71            | 641.46             |
| A_68_P21115066 | chr2:32237310-32237354                            | NM_198001:103      | 1110008P14Rik | INSIDE                 | 0.697                                                        | 0.603                          | 889.30             | 535.82             | 0.420                          | 660.80             | 277.51             |
| A_68_P23562890 | chr5:28791591-28791635                            | NR_015562:-1911    | 9530036O11Rik | PROMOTER               | 0.697                                                        | 0.582                          | 968.63             | 563.71             | 0.405                          | 905.60             | 367.17             |
| A_68_P23335795 | chr4:136326956-136327004                          | NM_010142:64870    | Ephb2         | INSIDE                 | 0.697                                                        | 2.449                          | 783.68             | 1919.59            | 1.708                          | 663.37             | 1132.98            |
| A_68_P24863966 | chr6:134819841-134819893                          | NM_001167697:18011 | Gpr19         | INSIDE                 | 0.697                                                        | 2.503                          | 692.27             | 1732.76            | 1.745                          | 499.76             | 872.05             |
| A_68_P27902198 | chr11:70513486-70513530                           | NM_213729:149      | Inca1         | INSIDE                 | 0.697                                                        | 0.688                          | 1726.77            | 1188.32            | 0.480                          | 1348.04            | 646.65             |
| A_68_P27234952 | chr10:70810826-70810870                           | NM_027184:308      | Ipmk          | INSIDE                 | 0.697                                                        | 0.701                          | 4909.12            | 3439.73            | 0.488                          | 3668.05            | 1791.30            |
| A_68_P24137693 | chr5:140276198-140276242                          | NM_010757:8731     | Mafk          | INSIDE                 | 0.697                                                        | 2.139                          | 1292.44            | 2764.97            | 1.491                          | 989.49             | 1475.64            |
| A_68_P32252893 | chrX:10295189-10295233                            | NM_001166635:720   | Mid1ip1       | INSIDE                 | 0.697                                                        | 3.624                          | 811.67             | 2941.23            | 2.526                          | 282.11             | 712.70             |
| A_68_P23401740 | chr4:149029433-149029477                          | NM_001164052:7971  | Pik3cd        | INSIDE                 | 0.697                                                        | 2.573                          | 1302.84            | 3352.23            | 1.794                          | 920.73             | 1651.77            |
| A_68_P29055231 | chr13:55574123-55574167                           | NM_001030296:8517  | Prr7          | INSIDE                 | 0.697                                                        | 0.454                          | 1655.72            | 750.91             | 0.316                          | 1282.55            | 405.58             |
| A_68_P31256437 | chr17:56615365-56615409                           | NM_011218:517      | Ptprs         | INSIDE                 | 0.697                                                        | 0.603                          | 2791.05            | 1683.58            | 0.420                          | 2136.84            | 897.88             |
| A_68_P22392371 | chr3:104442921-104442965                          | NM_009196:352      | Slc16a1       | INSIDE                 | 0.697                                                        | 0.467                          | 1128.11            | 526.97             | 0.326                          | 1054.45            | 343.28             |
| A_68_P25956521 | chr8:73891201-73891245                            | NM_025917:107      | Use1          | INSIDE                 | 0.697                                                        | 0.474                          | 1638.25            | 777.13             | 0.330                          | 1159.60            | 383.14             |
| A_68_P26736551 | chr9:94438921-94438965                            | NM_001033145:-442  | 1190002N15Rik | PROMOTER               | 0.696                                                        | 0.473                          | 1867.19            | 883.29             | 0.329                          | 1429.46            | 470.96             |
| A_68_P21516956 | chr2:109563795-109563839                          | NM_001048142:30097 | Bdnf          | INSIDE                 | 0.696                                                        | 3.682                          | 1650.35            | 6076.83            | 2.565                          | 1222.16            | 3134.37            |
| A_68_P29501751 | chr14:30535961-30536005                           | NM_009785:-932     | Caena2d3      | PROMOTER               | 0.696                                                        | 0.558                          | 1979.53            | 1104.23            | 0.388                          | 1609.18            | 624.66             |
| A_68_P27367737 | chr10:95403162-95403206                           | NM_001001932:-112  | Eea1          | PROMOTER               | 0.696                                                        | 0.715                          | 1850.86            | 1323.35            | 0.498                          | 1405.40            | 699.38             |



| ProbeName      | Target position of probe on CpG island microarray | TargetID                 | GeneSymbol    | CpG island Description | Ratio of relative methylation (TiO <sub>2</sub> -NP/Vehicle) | Sham group                     |                    |                    | TiO <sub>2</sub> -H group      |                    |                    |
|----------------|---------------------------------------------------|--------------------------|---------------|------------------------|--------------------------------------------------------------|--------------------------------|--------------------|--------------------|--------------------------------|--------------------|--------------------|
|                |                                                   |                          |               |                        |                                                              | Relative methylation (Cy5/Cy3) | Cy3 signal (Input) | Cy5 signal (MeDIP) | Relative methylation (Cy5/Cy3) | Cy3 signal (Input) | Cy5 signal (MeDIP) |
| A_68_P21603045 | chr2:125332058-125332102                          | NM_007993:94             | Fbn1          | INSIDE                 | 0.696                                                        | 0.565                          | 1621.50            | 916.59             | 0.394                          | 1496.76            | 589.20             |
| A_68_P29083949 | chr13:60278471-60278515                           | NM_008086:404            | Gas1          | INSIDE                 | 0.696                                                        | 0.624                          | 2201.09            | 1373.66            | 0.434                          | 1819.50            | 790.16             |
| A_68_P27973895 | chr11:83665005-83665049                           | NM_009330:656            | Hnf1b         | INSIDE                 | 0.696                                                        | 0.695                          | 1386.97            | 963.94             | 0.483                          | 1187.46            | 574.10             |
| A_68_P27845571 | chr11:60745673-60745717                           | NM_008928:136            | Map2k3        | INSIDE                 | 0.696                                                        | 0.594                          | 2179.34            | 1293.99            | 0.414                          | 1687.21            | 687.79             |
| A_68_P31618904 | chr18:35722537-35722581                           | NM_010771:747            | Matr3         | INSIDE                 | 0.696                                                        | 0.661                          | 2846.50            | 1881.63            | 0.460                          | 2141.72            | 985.59             |
| A_68_P24137288 | chr5:140212139-140212183                          | NM_174850:127            | Mical2        | INSIDE                 | 0.696                                                        | 0.623                          | 1451.27            | 904.52             | 0.433                          | 1082.32            | 469.18             |
| A_68_P30376708 | chr15:81021101-81021145                           | NM_001082536:65          | Mkl1          | INSIDE                 | 0.696                                                        | 0.371                          | 4904.97            | 1821.46            | 0.259                          | 3769.04            | 974.71             |
| A_68_P26824825 | chr9:110532716-110532765                          | NM_183276:23925          | Nbeal2        | INSIDE                 | 0.696                                                        | 3.030                          | 941.40             | 2852.73            | 2.108                          | 726.92             | 1532.44            |
| A_68_P27710219 | chr11:35860895-35860940                           | NM_011856:896828         | Odz2          | INSIDE                 | 0.696                                                        | 3.937                          | 737.49             | 2903.25            | 2.738                          | 527.71             | 1445.05            |
| A_68_P25361260 | chr7:106497298-106497342                          | NM_001111043:4429        | Serpinh1      | INSIDE                 | 0.696                                                        | 2.289                          | 998.53             | 2285.90            | 1.593                          | 709.01             | 1129.30            |
| A_68_P30004450 | chr15:9070068-9070112                             | NM_013787:117            | Skp2          | INSIDE                 | 0.696                                                        | 0.631                          | 1746.56            | 1101.38            | 0.439                          | 1312.45            | 575.97             |
| A_68_P28042073 | chr11:95896364-95896408                           | NM_033568:156            | Snf8          | INSIDE                 | 0.696                                                        | 0.469                          | 1985.98            | 932.04             | 0.326                          | 1587.99            | 518.33             |
| A_68_P24155792 | chr5:144031402-144031446                          | NM_017467:277            | Zfp316        | INSIDE                 | 0.696                                                        | 0.580                          | 3890.05            | 2255.93            | 0.404                          | 3150.94            | 1271.44            |
| A_68_P21341873 | chr2:74976122-74976166                            | ENSMUST00000143898:-289  |               | PROMOTER               | 0.696                                                        | 0.698                          | 1831.51            | 1277.55            | 0.485                          | 1602.37            | 777.86             |
| A_68_P24768720 | chr6:114987629-114987673                          | NM_026894:242            | 1500001M20Rik | INSIDE                 | 0.695                                                        | 0.572                          | 1332.11            | 761.66             | 0.397                          | 1167.24            | 463.55             |
| A_68_P20789366 | chr1:166388627-166388671                          | NM_009721:-162           | Atp1b1        | PROMOTER               | 0.695                                                        | 0.558                          | 2387.22            | 1331.26            | 0.387                          | 1897.03            | 734.95             |
| A_68_P27796928 | chr11:51817669-51817713                           | NM_001166655:-32         | Cdkl3         | DIVERGENT_PROMOTER     | 0.695                                                        | 0.550                          | 953.29             | 524.44             | 0.383                          | 782.29             | 299.29             |
| A_68_P27927582 | chr11:75493063-75493107                           | NM_133656:273            | Crk           | INSIDE                 | 0.695                                                        | 0.345                          | 1622.06            | 559.91             | 0.240                          | 1180.93            | 283.49             |
| A_68_P30578862 | chr16:18289475-18289519                           | NM_033324:-235           | Dger8         | PROMOTER               | 0.695                                                        | 0.464                          | 2814.07            | 1306.61            | 0.323                          | 2400.82            | 774.39             |
| A_68_P20947554 | chr1:194979527-194979571                          | NM_016851:243            | Irf6          | INSIDE                 | 0.695                                                        | 0.596                          | 3148.43            | 1876.23            | 0.414                          | 2828.12            | 1170.77            |
| A_68_P26531898 | chr9:55393314-55393358                            | NM_027397:4381           | Isl2          | INSIDE                 | 0.695                                                        | 0.636                          | 1245.19            | 791.73             | 0.442                          | 1023.87            | 452.59             |
| A_68_P28814400 | chr13:9093008-9093052                             | NM_172585:-120           | Larp4b        | PROMOTER               | 0.695                                                        | 0.608                          | 1561.75            | 949.58             | 0.423                          | 1305.95            | 552.06             |
| A_68_P25948237 | chr8:72356566-72356610                            | NM_001024954:-14         | Pbx4          | PROMOTER               | 0.695                                                        | 0.612                          | 1092.52            | 668.66             | 0.425                          | 936.71             | 398.29             |
| A_68_P26145654 | chr8:110112041-110112085                          | NM_010817:320            | Psmc7         | INSIDE                 | 0.695                                                        | 0.663                          | 2121.68            | 1405.97            | 0.460                          | 1739.62            | 800.96             |
| A_68_P22527927 | chr3:130433279-130433323                          | NM_001199350:-53         | Rpl34-ps1     | PROMOTER               | 0.695                                                        | 0.516                          | 1318.87            | 679.94             | 0.358                          | 1069.49            | 383.14             |
| A_68_P23993056 | chr5:113006473-113006517                          | NM_019982:-289           | Sez6l         | PROMOTER               | 0.695                                                        | 0.565                          | 1855.15            | 1047.71            | 0.392                          | 1357.50            | 532.77             |
| A_68_P31501879 | chr18:12802846-12802890                           | NM_028341:827            | Ttc39c        | INSIDE                 | 0.695                                                        | 0.614                          | 1130.41            | 694.33             | 0.427                          | 872.02             | 372.50             |
| A_68_P31253705 | chr17:56214152-56214198                           | NM_024432:238            | Ubxn6         | INSIDE                 | 0.695                                                        | 4.386                          | 6177.25            | 27091.23           | 3.049                          | 4582.01            | 13969.99           |
| A_68_P30660862 | chr16:33966764-33966808                           | NM_009471:303            | Umps          | INSIDE                 | 0.695                                                        | 0.492                          | 1842.53            | 907.08             | 0.342                          | 1414.82            | 484.11             |
| A_68_P31403206 | chr17:84587417-84587461                           | NM_001001806:-151        | Zfp3612       | PROMOTER               | 0.695                                                        | 0.483                          | 1157.99            | 559.22             | 0.336                          | 951.40             | 319.45             |
| A_68_P23971467 | chr5:108795517-108795561                          | ENSMUST00000100944:-3338 |               | PROMOTER               | 0.695                                                        | 0.508                          | 2314.48            | 1176.54            | 0.353                          | 1975.71            | 698.10             |
| A_68_P20504208 | chr1:107560530-107560574                          | NM_029349:115            | 2310035C23Rik | INSIDE                 | 0.694                                                        | 0.614                          | 1185.82            | 728.60             | 0.427                          | 983.00             | 419.38             |
| A_68_P31336383 | chr17:72132310-72132354                           | NM_030179:1046           | Clip4         | INSIDE                 | 0.694                                                        | 0.665                          | 1190.94            | 791.64             | 0.461                          | 1150.68            | 530.48             |
| A_68_P31620538 | chr18:36020156-36020200                           | NM_133687:30707          | Cxcr5         | INSIDE                 | 0.694                                                        | 2.083                          | 1139.80            | 2373.93            | 1.446                          | 955.47             | 1381.23            |
| A_68_P31953772 | chr19:11015670-11015714                           | NM_009962:4043           | Gpr44         | INSIDE                 | 0.694                                                        | 0.676                          | 2282.94            | 1542.28            | 0.469                          | 1715.31            | 804.06             |
| A_68_P23592019 | chr5:34339056-34339100                            | NM_001001985:446         | Nat8l         | INSIDE                 | 0.694                                                        | 0.633                          | 3594.93            | 2277.22            | 0.440                          | 2551.28            | 1122.35            |
| A_68_P26551395 | chr9:58883489-58883533                            | NM_001042752:738         | Neo1          | INSIDE                 | 0.694                                                        | 0.716                          | 2348.32            | 1681.07            | 0.497                          | 1695.94            | 842.58             |
| A_68_P31161704 | chr17:36054019-36054063                           | NM_001163818:-100        | Ppp1r10       | PROMOTER               | 0.694                                                        | 0.504                          | 1098.47            | 553.85             | 0.350                          | 841.09             | 294.20             |
| A_68_P23649338 | chr5:44492651-44492695                            | NM_001163584:-6665       | Prom1         | PROMOTER               | 0.694                                                        | 0.645                          | 1320.77            | 852.34             | 0.448                          | 1169.60            | 523.49             |
| A_68_P21152634 | chr2:39045653-39045697                            | NM_178778:576            | Scal          | INSIDE                 | 0.694                                                        | 0.460                          | 1672.26            | 770.05             | 0.320                          | 1192.58            | 381.33             |
| A_68_P27181919 | chr10:61177928-61177972                           | NM_001039194:-60         | Aifm2         | PROMOTER               | 0.693                                                        | 2.677                          | 3183.89            | 8524.00            | 1.855                          | 2581.25            | 4789.35            |
| A_68_P20411443 | chr1:88199921-88199965                            | NM_145222:147            | B3gnt7        | INSIDE                 | 0.693                                                        | 0.597                          | 1258.97            | 752.19             | 0.414                          | 989.70             | 409.53             |
| A_68_P28450018 | chr12:56086184-56086228                           | NM_013815:117            | Baz1a         | INSIDE                 | 0.693                                                        | 0.724                          | 2881.07            | 2084.80            | 0.501                          | 2378.49            | 1192.55            |
| A_68_P26531722 | chr9:55359661-55359705                            | NM_145615:368            | Etf1a         | INSIDE                 | 0.693                                                        | 0.604                          | 944.16             | 570.48             | 0.418                          | 836.55             | 350.05             |
| A_68_P21569908 | chr2:119302816-119302860                          | NM_026574:527            | Ino80         | INSIDE                 | 0.693                                                        | 0.478                          | 1490.84            | 712.26             | 0.331                          | 1236.47            | 409.36             |
| A_68_P23278936 | chr4:125911491-125911535                          | NM_001145970:22051       | Mtbp7d1       | INSIDE                 | 0.693                                                        | 2.956                          | 693.43             | 2049.59            | 2.047                          | 631.87             | 1293.59            |
| A_68_P28077767 | chr11:102007085-102007129                         | NM_178053:-573           | Nags          | PROMOTER               | 0.693                                                        | 0.554                          | 1377.22            | 763.25             | 0.384                          | 970.32             | 372.74             |
| A_68_P30346577 | chr15:76007094-76007138                           | NM_201394:19024          | Plec          | INSIDE                 | 0.693                                                        | 2.386                          | 785.02             | 1872.96            | 1.652                          | 620.97             | 1026.03            |
| A_68_P24464321 | chr6:54545667-54545711                            | NM_001001335:-7452       | Plekha8       | PROMOTER               | 0.693                                                        | 0.437                          | 1181.73            | 516.25             | 0.303                          | 956.64             | 289.69             |
| A_68_P25477639 | chr7:129303337-129303384                          | NM_011121:410            | Pik1          | INSIDE                 | 0.693                                                        | 0.575                          | 1484.84            | 853.44             | 0.398                          | 1140.34            | 454.22             |
| A_68_P25950464 | chr8:72735989-72736033                            | NM_001007570:170         | Ste25a42      | INSIDE                 | 0.693                                                        | 0.668                          | 4560.05            | 3044.74            | 0.463                          | 3095.10            | 1431.68            |

| ProbeName      | Target position of probe on CpG island microarray | TargetID                | GeneSymbol | CpG island Description | Ratio of relative methylation (TiO <sub>2</sub> -NP/Vehicle) | Sham group                     |                    |                    | TiO <sub>2</sub> -H group      |                    |                    |
|----------------|---------------------------------------------------|-------------------------|------------|------------------------|--------------------------------------------------------------|--------------------------------|--------------------|--------------------|--------------------------------|--------------------|--------------------|
|                |                                                   |                         |            |                        |                                                              | Relative methylation (Cy5/Cy3) | Cy3 signal (Input) | Cy5 signal (MeDIP) | Relative methylation (Cy5/Cy3) | Cy3 signal (Input) | Cy5 signal (MeDIP) |
| A_68_P25807976 | chr8:41984580-41984627                            | NM_001044740:36857      | Slc7a2     | INSIDE                 | 0.693                                                        | 2.514                          | 463.99             | 1166.51            | 1.742                          | 400.86             | 698.33             |
| A_68_P31620630 | chr18:36033185-36033229                           |                         | Unknown    |                        | 0.693                                                        | 0.601                          | 5132.45            | 3083.65            | 0.416                          | 3761.46            | 1566.34            |
| A_68_P24641622 | chr6:91793552-91793596                            |                         | Unknown    |                        | 0.693                                                        | 0.652                          | 1449.33            | 945.37             | 0.452                          | 1251.69            | 565.93             |
| A_68_P28123543 | chr11:110198733-110198777                         | NM_147219:276           | Abca5      | INSIDE                 | 0.692                                                        | 0.711                          | 4231.15            | 3006.85            | 0.491                          | 3635.03            | 1786.42            |
| A_68_P25948485 | chr8:72406884-72406928                            | NM_026818:4385          | Cilp2      | INSIDE                 | 0.692                                                        | 0.681                          | 1214.26            | 827.45             | 0.472                          | 1055.45            | 498.01             |
| A_68_P28610003 | chr12:87763757-87763801                           | NM_011934:1185          | Esrrb      | INSIDE                 | 0.692                                                        | 0.543                          | 2123.21            | 1153.81            | 0.376                          | 1653.20            | 621.43             |
| A_68_P31677414 | chr18:46685686-46685730                           | NM_173423:-83           | Fem1c      | PROMOTER               | 0.692                                                        | 2.904                          | 4249.78            | 12340.96           | 2.010                          | 3517.58            | 7070.26            |
| A_68_P20240345 | chr1:55145369-55145413                            | NM_008303:399           | Hspe1      | INSIDE                 | 0.692                                                        | 0.481                          | 1214.46            | 584.10             | 0.333                          | 1044.30            | 347.64             |
| A_68_P25656261 | chr8:11561742-11561794                            | NM_011919:5703          | Ing1       | INSIDE                 | 0.692                                                        | 2.925                          | 3040.76            | 8894.59            | 2.025                          | 2076.39            | 4205.51            |
| A_68_P24609841 | chr6:86338705-86338755                            | NM_025823:8414          | Peyox1     | INSIDE                 | 0.692                                                        | 2.391                          | 756.37             | 1808.36            | 1.654                          | 535.22             | 885.15             |
| A_68_P29337691 | chr13:113717612-113717656                         | NM_028151:-46           | Skiv2l2    | DIVERGENT_PROMOTER     | 0.692                                                        | 0.668                          | 1399.33            | 934.31             | 0.462                          | 1208.62            | 558.82             |
| A_68_P24954135 | chr7:6083578-6083622                              | NM_001013012:23973      | Zfp787     | INSIDE                 | 0.692                                                        | 3.262                          | 2246.21            | 7327.51            | 2.258                          | 1565.21            | 3534.68            |
| A_68_P28680483 | chr12:101425716-101425760                         | ENSMUST00000146364:-439 |            | PROMOTER               | 0.692                                                        | 0.623                          | 1424.75            | 887.18             | 0.431                          | 1158.85            | 499.47             |
| A_68_P22859203 | chr4:40801292-40801336                            | NM_022305:-283          | B4galt1    | PROMOTER               | 0.691                                                        | 0.459                          | 2317.05            | 1062.95            | 0.317                          | 1958.69            | 621.30             |
| A_68_P20786426 | chr1:165924837-165924881                          | NM_201364:54            | BC055324   | INSIDE                 | 0.691                                                        | 0.575                          | 1506.08            | 865.49             | 0.397                          | 1246.67            | 495.04             |
| A_68_P26080205 | chr8:97436931-97436975                            | NM_001033533:5046       | Ccdc102a   | INSIDE                 | 0.691                                                        | 0.660                          | 1001.81            | 661.48             | 0.456                          | 791.03             | 360.75             |
| A_68_P27750958 | chr11:43342876-43342920                           | NM_001045530:613        | Cenjl      | INSIDE                 | 0.691                                                        | 0.643                          | 2385.19            | 1533.76            | 0.444                          | 1837.33            | 816.56             |
| A_68_P25024699 | chr7:29766684-29766728                            | NM_028659:127           | Eif3k      | INSIDE                 | 0.691                                                        | 0.584                          | 1714.18            | 1000.36            | 0.403                          | 1258.74            | 507.44             |
| A_68_P24004043 | chr5:114894003-114894047                          | NM_029956:12            | Mmab       | INSIDE                 | 0.691                                                        | 0.736                          | 2863.32            | 2107.10            | 0.509                          | 2466.02            | 1254.84            |
| A_68_P22422568 | chr3:109945463-109945507                          | NM_001163348:906        | Ntng1      | INSIDE                 | 0.691                                                        | 0.554                          | 1776.81            | 984.45             | 0.383                          | 1375.22            | 526.41             |
| A_68_P26798483 | chr9:105546867-105546912                          | NM_001081309:1565       | Pik3r4     | INSIDE                 | 0.691                                                        | 2.113                          | 1690.32            | 3572.08            | 1.460                          | 1350.12            | 1970.95            |
| A_68_P30778985 | chr16:56038024-56038068                           | NM_029092:-159          | Rgnmt1     | PROMOTER               | 0.691                                                        | 0.676                          | 1089.63            | 736.80             | 0.467                          | 828.97             | 387.21             |
| A_68_P30686022 | chr16:38446053-38446100                           | NM_007414:6693          | Adprh      | INSIDE                 | 0.690                                                        | 3.477                          | 516.64             | 1796.44            | 2.399                          | 512.40             | 1229.15            |
| A_68_P22449317 | chr3:116126878-116126922                          | NM_001080818:50         | Cdc14a     | INSIDE                 | 0.690                                                        | 0.667                          | 1819.45            | 1213.53            | 0.460                          | 1146.50            | 527.46             |
| A_68_P25047615 | chr7:35904906-35904950                            | NM_007678:617           | Cebpa      | INSIDE                 | 0.690                                                        | 0.530                          | 2320.93            | 1230.11            | 0.366                          | 1867.45            | 683.07             |
| A_68_P24159778 | chr5:144934748-144934792                          | NM_001081109:73466      | Lmtk2      | INSIDE                 | 0.690                                                        | 2.652                          | 1056.32            | 2801.79            | 1.829                          | 911.55             | 1667.41            |
| A_68_P30346591 | chr15:76008957-76009001                           | NM_201394:17162         | Plec       | INSIDE                 | 0.690                                                        | 2.736                          | 818.69             | 2239.59            | 1.888                          | 726.04             | 1370.64            |
| A_68_P27673279 | chr11:29072650-29072694                           | NM_134034:-234          | Smek2      | PROMOTER               | 0.690                                                        | 0.421                          | 2075.22            | 873.27             | 0.290                          | 1518.24            | 440.73             |
| A_68_P21628393 | chr2:130004733-130004777                          | NM_009225:346           | Snrpb      | INSIDE                 | 0.690                                                        | 0.622                          | 1462.71            | 909.49             | 0.429                          | 1139.74            | 489.28             |
| A_68_P25003661 | chr7:24919152-24919197                            | NM_019941:-7            | Zfp235     | PROMOTER               | 0.690                                                        | 0.589                          | 983.89             | 579.72             | 0.407                          | 774.86             | 315.20             |
| A_68_P27284379 | chr10:80085336-80085380                           | NM_134002:-166          | Csnk1g2    | PROMOTER               | 0.689                                                        | 0.395                          | 1415.55            | 559.53             | 0.272                          | 1139.00            | 310.05             |
| A_68_P27288001 | chr10:80653093-80653137                           | NM_007828:6452          | Dapk3      | INSIDE                 | 0.689                                                        | 2.265                          | 4338.70            | 9826.34            | 1.560                          | 3144.48            | 4905.15            |
| A_68_P33015622 | chr1_random:50759-50807                           | NM_026866:134556        | Disp1      | INSIDE                 | 0.689                                                        | 3.139                          | 1088.41            | 3416.35            | 2.162                          | 822.92             | 1779.07            |
| A_68_P23445682 | chr5:3543936-3543980                              | NM_001042501:126        | Fam133b    | INSIDE                 | 0.689                                                        | 0.516                          | 1504.37            | 776.36             | 0.356                          | 1407.47            | 500.67             |
| A_68_P29697251 | chr14:70205056-70205100                           | NM_153514:274           | Rhobtb2    | INSIDE                 | 0.689                                                        | 0.388                          | 2278.64            | 883.05             | 0.267                          | 1870.58            | 499.51             |
| A_68_P21776098 | chr2:157104921-157104965                          | NM_019642:109           | Rpn2       | INSIDE                 | 0.689                                                        | 0.610                          | 1177.65            | 718.29             | 0.420                          | 1005.45            | 422.26             |
| A_68_P31334601 | chr17:71824126-71824170                           | NM_028887:535           | Smehd1     | INSIDE                 | 0.689                                                        | 0.585                          | 1090.80            | 638.57             | 0.403                          | 947.73             | 382.31             |
| A_68_P29733544 | chr14:76814636-76814680                           | NM_207652:-969          | Tsc22d1    | PROMOTER               | 0.689                                                        | 2.141                          | 4360.16            | 9334.01            | 1.475                          | 2852.08            | 4205.57            |
| A_68_P28155491 | chr11:115675906-115675950                         | NM_029557:-124          | Tsen54     | DIVERGENT_PROMOTER     | 0.689                                                        | 0.578                          | 1803.69            | 1042.37            | 0.398                          | 1408.51            | 560.77             |
| A_68_P29440559 | chr14:19725789-19725833                           | NM_144839:331           | Ube2c2     | INSIDE                 | 0.689                                                        | 0.559                          | 1276.37            | 713.40             | 0.385                          | 1030.76            | 396.93             |
| A_68_P24158010 | chr5:144493382-144493426                          | NM_029749:-255          | Usp42      | PROMOTER               | 0.689                                                        | 0.377                          | 1453.16            | 547.58             | 0.260                          | 1225.92            | 318.18             |
| A_68_P28599074 | chr12:85912374-85912418                           | NM_007701:1595          | Vsx2       | INSIDE                 | 0.689                                                        | 0.367                          | 2598.98            | 954.91             | 0.253                          | 2077.80            | 525.90             |
| A_68_P29662309 | chr14:64225736-64225780                           | NM_173393:392           | Xkr6       | INSIDE                 | 0.689                                                        | 0.691                          | 2284.73            | 1578.46            | 0.476                          | 1806.55            | 860.55             |
| A_68_P29477501 | chr14:26280580-26280624                           | NM_183208:1932          | Zmiz1      | INSIDE                 | 0.689                                                        | 0.560                          | 974.73             | 545.44             | 0.386                          | 698.28             | 269.37             |
| A_68_P26626260 | chr9:71981061-71981105                            |                         | Unknown    |                        | 0.689                                                        | 3.304                          | 657.21             | 2171.44            | 2.275                          | 642.22             | 1461.30            |
| A_68_P22509002 | chr3:127201649-127201693                          | ENSMUST00000104965:249  |            | INSIDE                 | 0.689                                                        | 0.688                          | 1294.56            | 890.14             | 0.474                          | 1171.78            | 554.91             |
| A_68_P23336493 | chr4:136436510-136436556                          | NM_009777:5560          | C1qb       | INSIDE                 | 0.688                                                        | 2.554                          | 524.82             | 1340.45            | 1.756                          | 440.42             | 773.51             |
| A_68_P25020923 | chr7:29062778-29062822                            | NM_001177427:76         | Eid2b      | INSIDE                 | 0.688                                                        | 0.670                          | 1109.22            | 742.63             | 0.461                          | 787.32             | 362.89             |
| A_68_P22478234 | chr3:121426543-121426587                          | NM_010171:110           | F3         | INSIDE                 | 0.688                                                        | 0.521                          | 1752.31            | 912.41             | 0.358                          | 1407.16            | 503.98             |
| A_68_P20091642 | chr1:24106929-24106973                            | NM_026604:230           | Fam135a    | INSIDE                 | 0.688                                                        | 0.388                          | 1541.03            | 597.91             | 0.267                          | 1282.51            | 342.26             |
| A_68_P32095554 | chr19:37509531-37509575                           | NM_008245:222           | Hhex       | INSIDE                 | 0.688                                                        | 0.479                          | 2204.80            | 1056.21            | 0.330                          | 1836.93            | 605.79             |

| ProbeName      | Target position of probe on CpG island microarray | TargetID                | GeneSymbol    | CpG island Description | Ratio of relative methylation (TiO <sub>2</sub> -NP/Vehicle) | Sham group                     |                    |                    | TiO <sub>2</sub> -H group      |                    |                    |
|----------------|---------------------------------------------------|-------------------------|---------------|------------------------|--------------------------------------------------------------|--------------------------------|--------------------|--------------------|--------------------------------|--------------------|--------------------|
|                |                                                   |                         |               |                        |                                                              | Relative methylation (Cy5/Cy3) | Cy3 signal (Input) | Cy5 signal (MeDIP) | Relative methylation (Cy5/Cy3) | Cy3 signal (Input) | Cy5 signal (MeDIP) |
| A_68_P28091894 | chr11:104469397-104469441                         | NM_016780:105           | Irgb3         | INSIDE                 | 0.688                                                        | 0.612                          | 3183.72            | 1949.19            | 0.421                          | 2525.38            | 1064.26            |
| A_68_P29863083 | chr14:103380887-103380931                         | NM_177715:946           | Ketd12        | INSIDE                 | 0.688                                                        | 0.697                          | 1479.74            | 1031.64            | 0.480                          | 1162.28            | 557.40             |
| A_68_P26224547 | chr8:123632165-123632209                          | NM_001166482:93         | Mthfsd        | INSIDE                 | 0.688                                                        | 0.398                          | 1659.24            | 660.00             | 0.274                          | 1284.05            | 351.30             |
| A_68_P30514377 | chr16:5203908-5203952                             | NM_013796:175           | Nagpa         | INSIDE                 | 0.688                                                        | 0.682                          | 2948.51            | 2010.90            | 0.469                          | 2342.15            | 1098.32            |
| A_68_P21079204 | chr2:26358051-26358095                            | NM_008714:1270          | Notch1        | INSIDE                 | 0.688                                                        | 0.587                          | 1450.35            | 851.25             | 0.404                          | 1345.02            | 543.23             |
| A_68_P29509960 | chr14:31952198-31952242                           | NM_027289:4182          | Nt5dc2        | INSIDE                 | 0.688                                                        | 2.285                          | 1396.78            | 3191.19            | 1.572                          | 1103.15            | 1733.64            |
| A_68_P31923510 | chr19:4510696-4510740                             | NM_001162946:247        | Pcx           | INSIDE                 | 0.688                                                        | 0.568                          | 1546.08            | 878.66             | 0.391                          | 1327.53            | 518.89             |
| A_68_P30397298 | chr15:84685375-84685419                           | NM_001081166:1163       | Phf21b        | INSIDE                 | 0.688                                                        | 0.338                          | 1618.44            | 547.79             | 0.233                          | 1283.76            | 298.84             |
| A_68_P26809841 | chr9:107501260-107501304                          | NM_009153:6451          | Sema3b        | INSIDE                 | 0.688                                                        | 3.127                          | 1309.33            | 4094.29            | 2.150                          | 944.77             | 2031.46            |
| A_68_P22044436 | chr3:33698679-33698723                            | NM_025978:-416          | Ttc14         | PROMOTER               | 0.688                                                        | 0.639                          | 1293.25            | 826.52             | 0.440                          | 993.26             | 437.05             |
| A_68_P22038453 | chr3:32409465-32409509                            | NM_144519:-27           | Zfp639        | PROMOTER               | 0.688                                                        | 0.562                          | 2077.22            | 1167.39            | 0.387                          | 1741.25            | 673.70             |
| A_68_P28033906 | chr11:94462930-94462974                           | NM_153807:148           | Acsf2         | INSIDE                 | 0.687                                                        | 0.588                          | 1170.92            | 688.57             | 0.404                          | 896.55             | 361.96             |
| A_68_P27952856 | chr11:79968014-79968058                           | NM_172133:373           | Adap2         | INSIDE                 | 0.687                                                        | 2.141                          | 1729.17            | 3701.90            | 1.470                          | 1391.69            | 2045.46            |
| A_68_P25589623 | chr7:148748286-148748330                          | NM_007459:230           | Ap2a2         | INSIDE                 | 0.687                                                        | 0.418                          | 1614.50            | 675.53             | 0.287                          | 1296.35            | 372.45             |
| A_68_P24818643 | chr6:125046676-125046720                          | NM_145979:518           | Chd4          | INSIDE                 | 0.687                                                        | 0.673                          | 1123.22            | 756.09             | 0.462                          | 860.94             | 397.85             |
| A_68_P24057006 | chr5:124134216-124134260                          | NM_019765:62            | Clip1         | INSIDE                 | 0.687                                                        | 0.552                          | 5661.85            | 3123.99            | 0.379                          | 4627.60            | 1754.33            |
| A_68_P29863558 | chr14:103469714-103469758                         | NM_001033242:304        | Cln5          | INSIDE                 | 0.687                                                        | 0.535                          | 1411.50            | 754.88             | 0.367                          | 1233.00            | 452.99             |
| A_68_P30349378 | chr15:76437639-76437683                           | NM_001164173:361        | Cpsf1         | INSIDE                 | 0.687                                                        | 0.517                          | 1702.09            | 880.66             | 0.356                          | 1259.14            | 447.65             |
| A_68_P26504864 | chr9:50467840-50467884                            | NM_145614:23            | Dlat          | INSIDE                 | 0.687                                                        | 0.526                          | 1505.41            | 792.43             | 0.362                          | 1282.19            | 463.85             |
| A_68_P26531905 | chr9:55394153-55394197                            | NM_027397:5219          | Isl2          | DOWNSTREAM             | 0.687                                                        | 0.505                          | 1800.88            | 910.18             | 0.347                          | 1606.19            | 557.71             |
| A_68_P26228657 | chr8:124277495-124277539                          | NM_020605:23058         | Jph3          | INSIDE                 | 0.687                                                        | 4.170                          | 3494.70            | 14572.88           | 2.863                          | 2389.38            | 6840.43            |
| A_68_P20637315 | chr1:136982242-136982286                          | NM_001033409:19589      | Lgr6          | INSIDE                 | 0.687                                                        | 3.991                          | 571.95             | 2282.63            | 2.741                          | 486.93             | 1334.82            |
| A_68_P27181451 | chr10:61088741-61088785                           | NM_001177511:30531      | Npffr1        | INSIDE                 | 0.687                                                        | 0.625                          | 1350.13            | 843.68             | 0.429                          | 1159.09            | 497.59             |
| A_68_P25614472 | chr8:3537844-3537888                              | NM_001122818:22483      | Pnpla6        | INSIDE                 | 0.687                                                        | 3.459                          | 1058.54            | 3661.45            | 2.376                          | 901.47             | 2142.26            |
| A_68_P20770874 | chr1:163181125-163181169                          | NM_007453:151           | Prdx6         | INSIDE                 | 0.687                                                        | 0.682                          | 1467.11            | 1000.13            | 0.468                          | 1099.00            | 514.40             |
| A_68_P23328082 | chr4:134908937-134908981                          | NM_001130477:171        | Srrm1         | INSIDE                 | 0.687                                                        | 0.556                          | 2728.00            | 1516.43            | 0.382                          | 2165.13            | 826.53             |
| A_68_P21844028 | chr2:168719852-168719896                          | ENSMUST0000029064:32506 |               | INSIDE                 | 0.687                                                        | 3.184                          | 469.61             | 1495.03            | 2.186                          | 399.41             | 872.95             |
| A_68_P27279763 | chr10:79389909-79389953                           | NM_007880:114           | Arid3a        | INSIDE                 | 0.686                                                        | 0.697                          | 1103.67            | 769.51             | 0.478                          | 791.61             | 378.75             |
| A_68_P27272487 | chr10:77632541-77632585                           | NM_138601:-49           | D10Jhu81e     | PROMOTER               | 0.686                                                        | 0.528                          | 1205.85            | 637.03             | 0.362                          | 1006.37            | 364.45             |
| A_68_P23392615 | chr4:147514553-147514597                          | NM_027985:-24           | Mad2l2        | DIVERGENT_PROMOTER     | 0.686                                                        | 0.643                          | 932.85             | 599.43             | 0.441                          | 765.24             | 337.21             |
| A_68_P26581618 | chr9:64234628-64234672                            | NM_172522:1218          | Megf11        | INSIDE                 | 0.686                                                        | 0.713                          | 1478.72            | 1054.17            | 0.489                          | 1119.08            | 547.26             |
| A_68_P22314351 | chr3:88340661-88340705                            | NR_035434:-378          | Mir1905       | PROMOTER               | 0.686                                                        | 0.712                          | 2102.36            | 1497.33            | 0.488                          | 1573.99            | 768.56             |
| A_68_P26742497 | chr9:95460516-95460560                            | NM_198414:303           | Paqr9         | INSIDE                 | 0.686                                                        | 0.541                          | 1199.90            | 649.19             | 0.371                          | 992.47             | 368.54             |
| A_68_P30481497 | chr15:99481812-99481856                           | NM_012025:218           | Racgap1       | INSIDE                 | 0.686                                                        | 0.703                          | 7033.81            | 4947.07            | 0.483                          | 5319.72            | 2568.43            |
| A_68_P30137689 | chr15:36212841-36212885                           | NM_013923:40            | Rnf19a        | INSIDE                 | 0.686                                                        | 0.708                          | 3102.26            | 2196.52            | 0.486                          | 2332.65            | 1133.61            |
| A_68_P26239789 | chr8:125935544-125935588                          | NM_023279:103           | Tubb3         | INSIDE                 | 0.686                                                        | 0.678                          | 1435.94            | 973.15             | 0.465                          | 1174.95            | 545.94             |
| A_68_P32143657 | chr19:46470296-46470340                           | NM_016860:-93           | Actr1a        | DIVERGENT_PROMOTER     | 0.685                                                        | 0.500                          | 1520.75            | 759.86             | 0.342                          | 1257.93            | 430.51             |
| A_68_P28153393 | chr11:115281149-115281196                         | NM_027862:61            | Atp5h         | INSIDE                 | 0.685                                                        | 0.676                          | 1394.60            | 942.79             | 0.463                          | 1047.24            | 485.24             |
| A_68_P27254396 | chr10:74524768-74524812                           | NM_001081412:1150       | Ber           | INSIDE                 | 0.685                                                        | 0.495                          | 1293.97            | 640.28             | 0.339                          | 968.38             | 328.05             |
| A_68_P31792973 | chr18:67800987-67801031                           | NM_001081073:-18        | Cep76         | DIVERGENT_PROMOTER     | 0.685                                                        | 0.651                          | 2122.86            | 1381.19            | 0.446                          | 1753.55            | 781.87             |
| A_68_P24141812 | chr5:141000260-141000310                          | NM_021528:18722         | Chst12        | INSIDE                 | 0.685                                                        | 2.690                          | 748.42             | 2013.00            | 1.843                          | 788.60             | 1453.51            |
| A_68_P26885387 | chr9:121668671-121668715                          | NR_033503:369           | E530011L22Rik | INSIDE                 | 0.685                                                        | 0.632                          | 4950.83            | 3130.05            | 0.433                          | 3533.14            | 1531.19            |
| A_68_P20562791 | chr1:122503854-122503898                          | NM_010133:4813          | En1           | INSIDE                 | 0.685                                                        | 0.564                          | 1037.42            | 585.58             | 0.387                          | 749.34             | 289.67             |
| A_68_P22013061 | chr3:27610037-27610081                            | NM_173182:-697          | Fndc3b        | PROMOTER               | 0.685                                                        | 0.573                          | 1231.53            | 705.33             | 0.393                          | 1172.40            | 460.27             |
| A_68_P32141592 | chr19:46077977-46078021                           | NM_176785:31            | Hps6          | INSIDE                 | 0.685                                                        | 0.576                          | 965.38             | 556.22             | 0.395                          | 738.42             | 291.54             |
| A_68_P26346747 | chr9:21172590-21172634                            | NM_001042708:166        | Ilf3          | INSIDE                 | 0.685                                                        | 0.421                          | 1835.08            | 773.26             | 0.288                          | 1383.28            | 399.04             |
| A_68_P28073803 | chr11:101286414-101286458                         | NM_172566:38            | Runde1        | INSIDE                 | 0.685                                                        | 0.640                          | 1201.68            | 769.29             | 0.439                          | 1001.24            | 439.37             |
| A_68_P30580603 | chr16:18586991-18587035                           | NM_011532:50            | Tbx1          | INSIDE                 | 0.685                                                        | 0.498                          | 1855.40            | 924.03             | 0.341                          | 1449.38            | 494.48             |
| A_68_P30479873 | chr15:99223693-99223737                           | NM_001171035:65         | Tmbim6        | INSIDE                 | 0.685                                                        | 0.587                          | 2305.89            | 1353.42            | 0.402                          | 1906.03            | 766.28             |
| A_68_P25957036 | chr8:74005119-74005163                            | NM_001164679:4826       | Ano8          | INSIDE                 | 0.684                                                        | 2.072                          | 1901.72            | 3939.49            | 1.416                          | 1441.20            | 2041.16            |
| A_68_P26055742 | chr8:93432780-93432824                            | NM_177224:80069         | Chd9          | INSIDE                 | 0.684                                                        | 0.422                          | 1842.60            | 778.01             | 0.289                          | 1534.03            | 443.35             |

| ProbeName      | Target position of probe on CpG island microarray | TargetID          | GeneSymbol    | CpG island Description | Ratio of relative methylation (TiO <sub>2</sub> -NP/Vehicle) | Sham group                     |                    |                    | TiO <sub>2</sub> -H group      |                    |                    |
|----------------|---------------------------------------------------|-------------------|---------------|------------------------|--------------------------------------------------------------|--------------------------------|--------------------|--------------------|--------------------------------|--------------------|--------------------|
|                |                                                   |                   |               |                        |                                                              | Relative methylation (Cy5/Cy3) | Cy3 signal (Input) | Cy5 signal (MeDIP) | Relative methylation (Cy5/Cy3) | Cy3 signal (Input) | Cy5 signal (MeDIP) |
| A_68_P21320137 | chr2:71384228-71384272                            | NM_010054:561     | Dlx2          | INSIDE                 | 0.684                                                        | 0.596                          | 1863.59            | 1110.85            | 0.408                          | 1431.78            | 583.95             |
| A_68_P28593018 | chr12:84828295-84828339                           | NM_058212:342     | Dp3f3         | INSIDE                 | 0.684                                                        | 0.671                          | 970.97             | 651.44             | 0.459                          | 831.32             | 381.34             |
| A_68_P28563523 | chr12:79327207-79327251                           | NM_145965:-413    | Gphn          | PROMOTER               | 0.684                                                        | 0.623                          | 1232.30            | 767.38             | 0.426                          | 1118.05            | 476.12             |
| A_68_P26458696 | chr9:42752203-42752247                            | NM_175481:230     | Grik4         | INSIDE                 | 0.684                                                        | 2.811                          | 10571.76           | 29719.22           | 1.922                          | 6798.45            | 13067.18           |
| A_68_P20156380 | chr1:37932346-37932395                            | NM_001037918:3320 | Lipt1         | INSIDE                 | 0.684                                                        | 3.693                          | 704.10             | 2600.02            | 2.526                          | 556.02             | 1404.40            |
| A_68_P24137692 | chr8:140276072-140276116                          | NM_010757:8605    | Mafk          | INSIDE                 | 0.684                                                        | 3.104                          | 1174.45            | 3645.28            | 2.122                          | 847.35             | 1797.68            |
| A_68_P26227634 | chr8:124114601-124114645                          | NM_026160:255     | Map1lc3b      | INSIDE                 | 0.684                                                        | 0.629                          | 1826.77            | 1149.90            | 0.431                          | 1507.59            | 649.39             |
| A_68_P30086027 | chr15:26239002-26239046                           | NM_177597:198     | Marchf11      | INSIDE                 | 0.684                                                        | 0.541                          | 2497.35            | 1351.91            | 0.370                          | 1881.62            | 697.04             |
| A_68_P27896369 | chr11:69476075-69476120                           | NM_011900:47      | Mpdu1         | INSIDE                 | 0.684                                                        | 0.698                          | 1395.52            | 973.43             | 0.477                          | 1202.53            | 573.41             |
| A_68_P27940739 | chr11:77796004-77796048                           | NM_174852:-291    | Phf12         | PROMOTER               | 0.684                                                        | 0.413                          | 1315.05            | 543.70             | 0.283                          | 1036.51            | 292.97             |
| A_68_P31127301 | chr17:29459054-29459101                           | NM_023734:3251    | Pil6          | INSIDE                 | 0.684                                                        | 2.188                          | 1317.53            | 2882.93            | 1.496                          | 986.47             | 1475.51            |
| A_68_P21831533 | chr2:166539060-166539104                          | NM_177782:250     | Prex1         | INSIDE                 | 0.684                                                        | 0.666                          | 918.15             | 611.73             | 0.456                          | 817.45             | 372.48             |
| A_68_P31023474 | chr17:7165620-7165665                             | NM_147155:-137    | Tagap1        | PROMOTER               | 0.684                                                        | 0.750                          | 5775.71            | 4331.47            | 0.513                          | 4062.05            | 2082.87            |
| A_68_P26013517 | chr8:85689748-85689792                            | NM_001111304:520  | Tbc1d9        | INSIDE                 | 0.684                                                        | 0.393                          | 1849.57            | 726.16             | 0.269                          | 1446.57            | 388.66             |
| A_68_P25798748 | chr8:40069239-40069283                            | NM_030254:340     | Tusc3         | INSIDE                 | 0.684                                                        | 0.393                          | 1620.47            | 636.33             | 0.268                          | 1401.12            | 376.12             |
| A_68_P31161378 | chr17:36003437-36003481                           | NM_175242:-101    | 2310014H01Rik | PROMOTER               | 0.683                                                        | 0.659                          | 2041.26            | 1345.76            | 0.450                          | 1511.59            | 680.22             |
| A_68_P31668412 | chr18:44821284-44821328                           | NR_026853:-12     | A930012L18Rik | PROMOTER               | 0.683                                                        | 0.616                          | 2755.43            | 1696.61            | 0.421                          | 2247.16            | 945.34             |
| A_68_P21516585 | chr2:109514331-109514375                          | NM_007540:-504    | Bdnf          | PROMOTER               | 0.683                                                        | 0.503                          | 1666.72            | 837.60             | 0.343                          | 1481.70            | 508.31             |
| A_68_P32128429 | chr19:43827379-43827423                           | NM_144874:90      | Cox15         | INSIDE                 | 0.683                                                        | 0.476                          | 1425.18            | 678.47             | 0.325                          | 1198.57            | 389.44             |
| A_68_P31193020 | chr17:44242569-44242613                           | NM_199016:167     | Enpp4         | INSIDE                 | 0.683                                                        | 0.616                          | 1657.03            | 1021.38            | 0.421                          | 1296.27            | 545.61             |
| A_68_P32461570 | chrX:70473796-70473840                            | NM_007978:174     | F8a           | INSIDE                 | 0.683                                                        | 3.165                          | 467.24             | 1478.61            | 2.161                          | 305.25             | 659.68             |
| A_68_P20863431 | chr1:180267832-180267876                          | NM_016805:61      | Hnrnpu        | INSIDE                 | 0.683                                                        | 0.572                          | 954.12             | 546.20             | 0.391                          | 931.67             | 364.04             |
| A_68_P28161478 | chr11:116688959-116689003                         | NM_026280:380     | Mxra7         | INSIDE                 | 0.683                                                        | 0.688                          | 1117.54            | 769.30             | 0.470                          | 1018.09            | 478.74             |
| A_68_P30392998 | chr15:83998328-83998372                           | NM_054088:105     | Pnpla3        | INSIDE                 | 0.683                                                        | 0.580                          | 1021.09            | 592.64             | 0.396                          | 816.65             | 323.67             |
| A_68_P26811066 | chr9:107673364-107673408                          | NM_148930:-53     | Rbm5          | PROMOTER               | 0.683                                                        | 0.543                          | 2115.91            | 1148.85            | 0.371                          | 1556.64            | 577.47             |
| A_68_P26660235 | chr9:78435636-78435680                            | NM_172773:176     | Slc17a5       | INSIDE                 | 0.683                                                        | 0.670                          | 2850.55            | 1911.08            | 0.458                          | 2277.65            | 1042.94            |
| A_68_P29269472 | chr13:101421231-101421275                         | NM_027139:-45     | Taf9          | DIVERGENT_PROMOTER     | 0.683                                                        | 0.327                          | 2726.81            | 891.91             | 0.223                          | 2284.93            | 510.24             |
| A_68_P31108363 | chr17:26250594-26250638                           | NM_021793:356     | Tmem8         | INSIDE                 | 0.683                                                        | 0.495                          | 2667.25            | 1319.09            | 0.338                          | 1976.85            | 667.47             |
| A_68_P23340751 | chr4:137150480-137150524                          | NM_130879:399     | Usp48         | INSIDE                 | 0.683                                                        | 0.324                          | 1611.24            | 521.97             | 0.221                          | 1172.50            | 259.45             |
| A_68_P31630977 | chr18:38095349-38095393                           | NM_007858:-305    | Diap1         | PROMOTER               | 0.682                                                        | 0.542                          | 953.84             | 517.09             | 0.370                          | 714.07             | 263.98             |
| A_68_P31827572 | chr18:73914245-73914289                           | NM_053255:-133    | Elac1         | PROMOTER               | 0.682                                                        | 0.685                          | 1442.75            | 988.80             | 0.467                          | 1232.23            | 575.74             |
| A_68_P24951533 | chr7:4960089-4960133                              | NM_001110330:4734 | Fiz1          | INSIDE                 | 0.682                                                        | 2.549                          | 466.31             | 1188.54            | 1.737                          | 459.07             | 797.52             |
| A_68_P26592537 | chr9:66198093-66198137                            | NM_145617:-142    | Here1         | PROMOTER               | 0.682                                                        | 0.444                          | 1236.08            | 548.43             | 0.302                          | 1055.67            | 319.31             |
| A_68_P21078496 | chr2:26264414-26264458                            | NM_033134:272     | Inpp5e        | INSIDE                 | 0.682                                                        | 0.600                          | 1585.31            | 951.67             | 0.410                          | 1347.95            | 551.99             |
| A_68_P21812074 | chr2:163202123-163202167                          | NM_021566:21565   | Jph2          | INSIDE                 | 0.682                                                        | 2.388                          | 852.58             | 2036.02            | 1.629                          | 727.26             | 1184.62            |
| A_68_P22082262 | chr3:40754266-40754310                            | NM_001040399:-264 | Larp1b        | PROMOTER               | 0.682                                                        | 3.077                          | 243.58             | 749.49             | 2.098                          | 291.33             | 611.28             |
| A_68_P22314130 | chr3:88306601-88306645                            | NM_019390:-9401   | Lmna          | PROMOTER               | 0.682                                                        | 0.377                          | 2143.13            | 807.09             | 0.257                          | 1775.63            | 455.77             |
| A_68_P27536529 | chr10:126981436-126981480                         | NM_008512:76746   | Lrp1          | INSIDE                 | 0.682                                                        | 2.357                          | 1246.14            | 2936.61            | 1.607                          | 901.22             | 1448.18            |
| A_68_P26821061 | chr9:109834270-109834314                          | NM_001205331:15   | Mtap4         | INSIDE                 | 0.682                                                        | 0.569                          | 1076.57            | 612.58             | 0.388                          | 937.57             | 363.64             |
| A_68_P28671528 | chr12:99927345-99927391                           | NM_011877:45487   | Ptpn21        | INSIDE                 | 0.682                                                        | 3.075                          | 1040.43            | 3199.62            | 2.099                          | 800.26             | 1679.48            |
| A_68_P29041947 | chr13:53206939-53206983                           | NM_013846:174518  | Ror2          | INSIDE                 | 0.682                                                        | 2.194                          | 1132.70            | 2484.95            | 1.497                          | 847.10             | 1268.27            |
| A_68_P23295436 | chr4:128866519-128866563                          | NM_029036:186     | S100pbbp      | INSIDE                 | 0.682                                                        | 2.532                          | 592.36             | 1499.77            | 1.727                          | 483.99             | 835.68             |
| A_68_P28635989 | chr12:92886073-92886119                           | NM_175367:138780  | Ston2         | INSIDE                 | 0.682                                                        | 2.861                          | 364.22             | 1042.12            | 1.952                          | 313.49             | 611.99             |
| A_68_P22359921 | chr3:98186541-98186585                            | NM_172863:159     | Zfp697        | INSIDE                 | 0.682                                                        | 0.349                          | 1534.49            | 535.82             | 0.238                          | 1409.56            | 335.53             |
| A_68_P30489505 | chr15:100908652-100908696                         | AK078004:-795     |               | PROMOTER               | 0.682                                                        | 0.665                          | 7103.47            | 4721.38            | 0.453                          | 5646.55            | 2558.60            |
| A_68_P29040996 | chr13:53024696-53024740                           | NM_016709:328     | Auh           | INSIDE                 | 0.681                                                        | 0.620                          | 2462.52            | 1525.86            | 0.422                          | 1843.06            | 777.26             |
| A_68_P27737179 | chr11:40568476-40568520                           | NM_009831:290     | Ceng1         | INSIDE                 | 0.681                                                        | 0.712                          | 2324.27            | 1654.79            | 0.485                          | 1708.80            | 828.93             |
| A_68_P27934406 | chr11:76659626-76659671                           | NM_007754:862     | Cpd           | INSIDE                 | 0.681                                                        | 0.423                          | 1330.18            | 563.23             | 0.288                          | 1053.81            | 303.88             |
| A_68_P21010260 | chr2:12223375-12223419                            | NM_001001309:151  | Itga8         | INSIDE                 | 0.681                                                        | 0.555                          | 1890.76            | 1048.90            | 0.378                          | 1500.04            | 566.42             |
| A_68_P21095673 | chr2:29050527-29050571                            | NM_133500:53012   | Ntng2         | INSIDE                 | 0.681                                                        | 0.581                          | 2275.90            | 1321.25            | 0.395                          | 1701.50            | 672.65             |
| A_68_P23341303 | chr4:137237621-137237665                          | NM_001081155:25   | Rap1gap       | INSIDE                 | 0.681                                                        | 0.312                          | 2655.98            | 827.77             | 0.212                          | 2099.42            | 445.45             |

| ProbeName      | Target position of probe on CpG island microarray | TargetID                 | GeneSymbol    | CpG island Description | Ratio of relative methylation (TiO <sub>2</sub> -NP/Vehicle) | Sham group                     |                    |                    | TiO <sub>2</sub> -H group      |                    |                    |
|----------------|---------------------------------------------------|--------------------------|---------------|------------------------|--------------------------------------------------------------|--------------------------------|--------------------|--------------------|--------------------------------|--------------------|--------------------|
|                |                                                   |                          |               |                        |                                                              | Relative methylation (Cy5/Cy3) | Cy3 signal (Input) | Cy5 signal (MeDIP) | Relative methylation (Cy5/Cy3) | Cy3 signal (Input) | Cy5 signal (MeDIP) |
| A_68_P29989754 | chr15:6659137-6659181                             | NM_030168:778            | Rictor        | INSIDE                 | 0.681                                                        | 0.605                          | 949.48             | 574.20             | 0.412                          | 673.27             | 277.44             |
| A_68_P29041943 | chr13:53206522-53206567                           | NM_013846:174934         | Ror2          | INSIDE                 | 0.681                                                        | 2.219                          | 1106.53            | 2455.46            | 1.511                          | 927.54             | 1401.53            |
| A_68_P31150659 | chr17:33961437-33961481                           | NM_016844:-15            | Rps28         | DIVERGENT_PROMOTER     | 0.681                                                        | 0.577                          | 1458.42            | 841.06             | 0.393                          | 1072.94            | 421.23             |
| A_68_P28177381 | chr11:119216624-119216668                         | NM_018822:178            | Sgsh          | INSIDE                 | 0.681                                                        | 0.711                          | 1447.07            | 1029.54            | 0.485                          | 1149.41            | 557.09             |
| A_68_P30019345 | chr15:11925242-11925286                           | NM_011294:498            | Sub1          | INSIDE                 | 0.681                                                        | 0.414                          | 2084.12            | 862.90             | 0.282                          | 1677.98            | 473.37             |
| A_68_P23337643 | chr4:136604702-136604746                          | NM_198248:-114           | Zbtb40        | PROMOTER               | 0.681                                                        | 0.724                          | 1864.32            | 1349.77            | 0.493                          | 1594.32            | 785.73             |
| A_68_P26232725 | chr8:124860203-124860247                          | NM_009569:54184          | Zfpn1         | INSIDE                 | 0.681                                                        | 0.555                          | 3646.95            | 2025.30            | 0.378                          | 2603.81            | 984.11             |
| A_68_P24631970 | chr6:90320418-90320462                            | NM_030260:953            | Zxdc          | INSIDE                 | 0.681                                                        | 0.686                          | 1972.03            | 1352.55            | 0.467                          | 1492.59            | 696.90             |
| A_68_P33005932 | A_68_P33005932                                    |                          | Unknown       |                        | 0.681                                                        | 5.456                          | 116.03             | 633.09             | 3.718                          | 160.59             | 596.99             |
| A_68_P21567210 | chr2:118801995-118802039                          | AK184532:42052           |               | INSIDE                 | 0.681                                                        | 0.662                          | 1334.51            | 882.86             | 0.450                          | 1016.25            | 457.67             |
| A_68_P23367953 | chr4:141697540-141697586                          | NM_144531:68561          | 9030409G11Rik | INSIDE                 | 0.680                                                        | 2.758                          | 474.41             | 1308.24            | 1.875                          | 458.82             | 860.23             |
| A_68_P21072310 | chr2:25316302-25316346                            | NM_153557:290            | BC029214      | INSIDE                 | 0.680                                                        | 0.632                          | 2882.94            | 1822.78            | 0.430                          | 2327.04            | 1000.96            |
| A_68_P21777899 | chr2:157391883-157391927                          | NM_016916:193            | Bicap         | INSIDE                 | 0.680                                                        | 0.527                          | 1269.24            | 669.07             | 0.359                          | 1182.05            | 423.87             |
| A_68_P23576265 | chr5:31371305-31371351                            | NM_023525:14145          | Cad           | INSIDE                 | 0.680                                                        | 2.507                          | 569.35             | 1427.48            | 1.704                          | 451.39             | 769.26             |
| A_68_P27289852 | chr10:80926846-80926890                           | NM_176954:18586          | CelF5         | INSIDE                 | 0.680                                                        | 0.616                          | 1056.66            | 650.64             | 0.419                          | 914.86             | 383.12             |
| A_68_P21489014 | chr2:104250060-104250104                          | NM_00103347:409          | D430041D05Rik | INSIDE                 | 0.680                                                        | 0.697                          | 1415.77            | 986.84             | 0.474                          | 1164.78            | 551.74             |
| A_68_P32053974 | chr19:29700925-29700969                           | NM_001081213:21964       | Ermp1         | INSIDE                 | 0.680                                                        | 3.253                          | 13512.39           | 43952.77           | 2.212                          | 10204.22           | 22574.45           |
| A_68_P24642400 | chr6:91929179-91929223                            | NM_172731:-7903          | Fgd5          | PROMOTER               | 0.680                                                        | 0.710                          | 2869.45            | 2036.06            | 0.482                          | 2025.80            | 976.82             |
| A_68_P29726035 | chr14:75530811-75530855                           | NM_027581:-142           | Lrrc63        | DIVERGENT_PROMOTER     | 0.680                                                        | 0.657                          | 2243.06            | 1473.69            | 0.447                          | 1972.90            | 880.97             |
| A_68_P25353896 | chr7:105260083-105260127                          | NM_008663:7899           | Myo7a         | INSIDE                 | 0.680                                                        | 0.697                          | 1164.64            | 811.86             | 0.474                          | 1138.79            | 539.49             |
| A_68_P27889090 | chr11:68199498-68199542                           | NM_008744:808            | Ntn1          | INSIDE                 | 0.680                                                        | 0.595                          | 1017.31            | 605.20             | 0.404                          | 908.58             | 367.39             |
| A_68_P30402710 | chr15:85565486-85565530                           | NM_001113418:-485        | Ppara         | PROMOTER               | 0.680                                                        | 0.527                          | 2242.95            | 1181.33            | 0.358                          | 1707.17            | 611.15             |
| A_68_P21833060 | chr2:166821691-166821735                          | NM_001109905:66          | Stau1         | INSIDE                 | 0.680                                                        | 0.663                          | 5938.79            | 3938.57            | 0.451                          | 4525.85            | 2041.43            |
| A_68_P28078907 | chr11:102180135-102180179                         | NM_001044383:-1555       | Ubf1          | PROMOTER               | 0.680                                                        | 0.629                          | 961.92             | 605.47             | 0.428                          | 885.87             | 379.44             |
| A_68_P31118861 | chr17:27994021-27994065                           | NM_001080769:591         | Uhrf1bp1      | INSIDE                 | 0.680                                                        | 0.448                          | 1403.28            | 628.58             | 0.304                          | 1113.50            | 338.96             |
| A_68_P28336340 | chr12:33063936-33063980                           | NM_001162903:305         | 2010109K11Rik | INSIDE                 | 0.679                                                        | 0.434                          | 2102.73            | 912.95             | 0.295                          | 1794.44            | 529.32             |
| A_68_P25637835 | chr8:8689975-8690019                              | NM_176849:541            | Arglu1        | INSIDE                 | 0.679                                                        | 0.444                          | 2065.29            | 916.57             | 0.302                          | 1692.06            | 510.25             |
| A_68_P28175723 | chr11:118942602-118942646                         | NM_007625:4927           | Cbx4          | INSIDE                 | 0.679                                                        | 0.679                          | 2542.35            | 5687.64            | 1.519                          | 1876.51            | 2850.68            |
| A_68_P29613441 | chr14:55260479-55260523                           | NM_199470:-299           | Cdh24         | PROMOTER               | 0.679                                                        | 0.561                          | 2836.98            | 1592.71            | 0.381                          | 2137.26            | 814.50             |
| A_68_P29134803 | chr13:72766020-72766064                           | NR_030701:-30            | D430050G20    | DIVERGENT_PROMOTER     | 0.679                                                        | 0.666                          | 3082.56            | 2051.93            | 0.452                          | 2198.05            | 992.88             |
| A_68_P26527198 | chr9:54547611-54547655                            | NM_021422:267            | Dnaja4        | INSIDE                 | 0.679                                                        | 0.433                          | 1915.56            | 828.66             | 0.294                          | 1400.73            | 411.65             |
| A_68_P25420896 | chr7:118923422-118923466                          | NM_173739:47             | Galnt4        | INSIDE                 | 0.679                                                        | 0.505                          | 1217.92            | 615.12             | 0.343                          | 1021.08            | 350.01             |
| A_68_P24126243 | chr5:137972158-137972202                          | NM_010312:2277           | Gnb2          | INSIDE                 | 0.679                                                        | 0.686                          | 2618.44            | 1795.22            | 0.465                          | 1991.97            | 926.94             |
| A_68_P25198321 | chr7:75310168-75310212                            | NM_010513:213048         | Igflr         | INSIDE                 | 0.679                                                        | 2.696                          | 1200.76            | 3237.15            | 1.830                          | 1026.42            | 1878.52            |
| A_68_P24052689 | chr5:123330434-123330478                          | NM_013910:19903          | Kdm2b         | INSIDE                 | 0.679                                                        | 1.999                          | 3467.76            | 6931.33            | 1.356                          | 2705.29            | 3669.68            |
| A_68_P21105340 | chr2:30663727-30663771                            | NM_170592:252            | Mettl11a      | INSIDE                 | 0.679                                                        | 0.655                          | 817.43             | 535.02             | 0.445                          | 584.50             | 259.87             |
| A_68_P24051801 | chr5:123157862-123157906                          | NM_011026:319            | P2rx4         | INSIDE                 | 0.679                                                        | 0.529                          | 1081.87            | 572.28             | 0.359                          | 986.88             | 354.20             |
| A_68_P27431035 | chr10:107769451-107769495                         | NM_054056:228            | Pawr          | INSIDE                 | 0.679                                                        | 0.416                          | 1831.20            | 761.38             | 0.282                          | 1597.66            | 451.00             |
| A_68_P24991408 | chr7:19680755-19680799                            | NM_011383:884            | Six5          | INSIDE                 | 0.679                                                        | 0.591                          | 1115.63            | 658.95             | 0.401                          | 954.73             | 382.66             |
| A_68_P31334604 | chr7:71824355-71824399                            | NM_028887:307            | Smchd1        | INSIDE                 | 0.679                                                        | 0.610                          | 3243.74            | 1977.51            | 0.414                          | 2541.53            | 1052.20            |
| A_68_P22543376 | chr3:133207147-133207191                          | NM_001040400:186         | Tet2          | INSIDE                 | 0.679                                                        | 0.273                          | 3611.66            | 987.41             | 0.186                          | 2830.56            | 525.58             |
| A_68_P27780291 | chr11:48663201-48663245                           | NM_053166:23583          | Trim7         | INSIDE                 | 0.679                                                        | 4.081                          | 3594.36            | 14669.74           | 2.771                          | 2409.65            | 6677.11            |
| A_68_P31982213 | chr19:16854797-16854841                           | NM_173028:599            | Vps13a        | INSIDE                 | 0.679                                                        | 0.595                          | 1902.90            | 1132.87            | 0.404                          | 1731.95            | 699.78             |
| A_68_P20628768 | chr1:135557603-135557647                          | NM_001166552:-162        | Zbed6         | PROMOTER               | 0.679                                                        | 0.691                          | 1815.98            | 1255.22            | 0.469                          | 1618.23            | 759.55             |
| A_68_P29097413 | chr13:64253752-64253796                           | NM_175494:733            | Zfp367        | INSIDE                 | 0.679                                                        | 0.472                          | 1744.61            | 822.76             | 0.320                          | 1360.91            | 435.67             |
| A_68_P31093091 | chr17:23837170-23837214                           | ENSMUST00000062827:22558 |               | DOWNSTREAM             | 0.679                                                        | 0.572                          | 1041.64            | 595.33             | 0.388                          | 813.31             | 315.64             |
| A_68_P26276393 | chr9:4309429-4309473                              | NM_026276:44             | Aasdhppt      | INSIDE                 | 0.678                                                        | 0.389                          | 1496.94            | 582.82             | 0.264                          | 1257.07            | 331.89             |
| A_68_P23797911 | chr5:73882756-73882800                            | NM_001190733:514         | Deun1d4       | INSIDE                 | 0.678                                                        | 2.701                          | 11644.76           | 31456.87           | 1.831                          | 7834.46            | 14346.24           |
| A_68_P27690045 | chr11:32542304-32542348                           | NM_134015:-548           | Fbxw11        | PROMOTER               | 0.678                                                        | 0.636                          | 1120.59            | 712.38             | 0.431                          | 966.68             | 416.55             |
| A_68_P20842584 | chr1:176431990-176432034                          | NM_019445:57             | Fmn2          | INSIDE                 | 0.678                                                        | 0.491                          | 1840.10            | 903.75             | 0.333                          | 1593.60            | 530.96             |
| A_68_P24990859 | chr7:19590097-19590141                            | NM_178757:705            | Irf2bp1       | INSIDE                 | 0.678                                                        | 0.680                          | 1755.85            | 1193.45            | 0.461                          | 1413.60            | 651.31             |

| ProbeName      | Target position of probe on CpG island microarray | TargetID                 | GeneSymbol    | CpG island Description | Ratio of relative methylation (TiO <sub>2</sub> -NP/Vehicle) | Sham group                     |                    |                    | TiO <sub>2</sub> -H group      |                    |                    |
|----------------|---------------------------------------------------|--------------------------|---------------|------------------------|--------------------------------------------------------------|--------------------------------|--------------------|--------------------|--------------------------------|--------------------|--------------------|
|                |                                                   |                          |               |                        |                                                              | Relative methylation (Cy5/Cy3) | Cy3 signal (Input) | Cy5 signal (MeDIP) | Relative methylation (Cy5/Cy3) | Cy3 signal (Input) | Cy5 signal (MeDIP) |
| A_68_P22467635 | chr3:119486116-119486160                          | NM_019550:168            | Ptbp2         | INSIDE                 | 0.678                                                        | 0.459                          | 1290.02            | 591.48             | 0.311                          | 1093.67            | 340.04             |
| A_68_P23074275 | chr4:85160223-85160267                            | ENSMUST00000147066:14    |               | INSIDE                 | 0.678                                                        | 0.372                          | 1982.97            | 737.85             | 0.252                          | 1561.58            | 393.76             |
| A_68_P24810289 | chr6:122714619-122714677                          | ENSMUST00000171541:15327 |               | INSIDE                 | 0.678                                                        | 0.586                          | 1168.37            | 684.87             | 0.397                          | 954.13             | 379.15             |
| A_68_P23573762 | chr5:30950209-30950253                            | NM_175675:-81            | 4930471M23Rik | PROMOTER               | 0.677                                                        | 0.639                          | 2107.64            | 1346.21            | 0.432                          | 1767.61            | 763.86             |
| A_68_P28153582 | chr1:115309493-115309537                          | NM_001033775:7656        | 4933422H20Rik | INSIDE                 | 0.677                                                        | 2.583                          | 1058.05            | 2733.01            | 1.749                          | 819.46             | 1433.43            |
| A_68_P20443145 | chr1:93437221-93437265                            | NM_023046:-414           | Asb1          | PROMOTER               | 0.677                                                        | 0.637                          | 1057.67            | 673.37             | 0.431                          | 983.46             | 424.13             |
| A_68_P27543825 | chr10:128346978-128347022                         | NM_007653:79             | Cd63          | INSIDE                 | 0.677                                                        | 0.683                          | 2144.45            | 1464.58            | 0.463                          | 1855.31            | 858.09             |
| A_68_P23094807 | chr4:88940152-88940196                            | NM_009877:349            | Cdkn2a        | INSIDE                 | 0.677                                                        | 0.610                          | 1421.78            | 867.07             | 0.413                          | 1136.51            | 469.57             |
| A_68_P23543722 | chr5:24256716-24256760                            | NM_153076:6923           | Crygn         | DOWNSTREAM             | 0.677                                                        | 0.656                          | 1246.78            | 817.69             | 0.444                          | 954.40             | 423.59             |
| A_68_P21374007 | chr2:80156093-80156137                            | NM_024181:492            | Dnajc10       | INSIDE                 | 0.677                                                        | 0.558                          | 1432.89            | 799.80             | 0.378                          | 1146.38            | 433.41             |
| A_68_P24533271 | chr6:70795056-70795100                            | NM_010121:558            | Eif2ak3       | INSIDE                 | 0.677                                                        | 0.665                          | 1911.05            | 1270.61            | 0.450                          | 1478.53            | 665.97             |
| A_68_P27784883 | chr11:49607746-49607790                           | NM_013529:112            | Gfp12         | INSIDE                 | 0.677                                                        | 0.702                          | 1282.49            | 900.36             | 0.475                          | 1129.16            | 536.33             |
| A_68_P25656231 | chr8:11558343-11558389                            | NM_011919:2301           | Ing1          | INSIDE                 | 0.677                                                        | 0.726                          | 2273.58            | 1650.52            | 0.491                          | 1759.02            | 864.48             |
| A_68_P27787506 | chr11:50050605-50050649                           | NM_008521:1347           | Ltc4s         | INSIDE                 | 0.677                                                        | 0.361                          | 1576.91            | 569.57             | 0.245                          | 1388.43            | 339.49             |
| A_68_P31109171 | chr17:26390076-26390120                           | NM_025881:244            | Luc7l         | INSIDE                 | 0.677                                                        | 0.697                          | 2158.07            | 1504.63            | 0.472                          | 1977.61            | 933.80             |
| A_68_P28089840 | chr11:104092393-104092437                         | NM_001038609:-335        | Ma1p          | PROMOTER               | 0.677                                                        | 0.619                          | 2129.17            | 1317.92            | 0.419                          | 1609.56            | 674.35             |
| A_68_P22532369 | chr3:131227486-131227530                          | NM_011863:-223           | Papss1        | PROMOTER               | 0.677                                                        | 0.646                          | 1566.13            | 1012.40            | 0.437                          | 1313.60            | 574.68             |
| A_68_P29773647 | chr14:84846157-84846201                           | NM_001013753:2809        | Pcdh17        | INSIDE                 | 0.677                                                        | 0.643                          | 3141.64            | 2021.12            | 0.435                          | 2418.45            | 1052.70            |
| A_68_P27838988 | chr11:59601147-59601191                           | NM_183139:-9             | Pld6          | PROMOTER               | 0.677                                                        | 0.469                          | 3032.00            | 1421.66            | 0.317                          | 2325.61            | 737.73             |
| A_68_P31934551 | chr19:6413350-6413399                             | NM_011242:12792          | Rasgrp2       | INSIDE                 | 0.677                                                        | 2.945                          | 1176.72            | 3465.49            | 1.993                          | 916.58             | 1826.51            |
| A_68_P26986175 | chr10:20032280-20032325                           | NM_001025392:28          | Belaf1        | INSIDE                 | 0.676                                                        | 0.485                          | 1391.03            | 674.28             | 0.328                          | 1262.70            | 413.96             |
| A_68_P30793140 | chr16:58728114-58728158                           | NM_171826:-20            | Cldnd1        | DIVERGENT_PROMOTER     | 0.676                                                        | 2.562                          | 12167.32           | 31168.94           | 1.731                          | 8479.00            | 14679.90           |
| A_68_P26137276 | chr8:108535235-108535279                          | NM_028038:130            | Ddx28         | INSIDE                 | 0.676                                                        | 0.602                          | 1041.66            | 626.73             | 0.407                          | 822.05             | 334.21             |
| A_68_P25592939 | chr7:149280544-149280588                          | NM_008748:623            | Dusp8         | INSIDE                 | 0.676                                                        | 0.500                          | 1989.12            | 994.60             | 0.338                          | 1580.34            | 533.93             |
| A_68_P27286410 | chr10:80393339-80393383                           | NM_008655:525            | Gadd45b       | INSIDE                 | 0.676                                                        | 0.618                          | 1942.04            | 1200.41            | 0.418                          | 1525.67            | 637.36             |
| A_68_P24186284 | chr5:150438995-150439039                          | NM_013559:-126           | Hsph1         | PROMOTER               | 0.676                                                        | 0.692                          | 1299.90            | 899.95             | 0.468                          | 925.49             | 433.23             |
| A_68_P25656232 | chr8:11558421-11558465                            | NM_011919:2377           | Ing1          | INSIDE                 | 0.676                                                        | 0.535                          | 1490.09            | 797.77             | 0.362                          | 1088.50            | 394.00             |
| A_68_P20864296 | chr11:180458833-180458877                         | NM_001161665:-401        | Kif26b        | PROMOTER               | 0.676                                                        | 0.642                          | 1212.57            | 777.93             | 0.433                          | 916.61             | 397.26             |
| A_68_P31930677 | chr19:5757705-5757749                             | NM_008520:16823          | Ltbp3         | INSIDE                 | 0.676                                                        | 2.457                          | 988.10             | 2428.06            | 1.661                          | 748.51             | 1242.94            |
| A_68_P30452810 | chr15:94353750-94353801                           | NM_172437:20163          | Pus7l         | INSIDE                 | 0.676                                                        | 2.563                          | 485.10             | 1243.46            | 1.733                          | 464.68             | 805.32             |
| A_68_P20441530 | chr1:93195184-93195228                            | NM_016717:292            | Scl1          | INSIDE                 | 0.676                                                        | 0.393                          | 2856.82            | 1122.13            | 0.265                          | 2200.85            | 584.12             |
| A_68_P31682229 | chr18:47526349-47526393                           | NM_018744:2152           | Sema6a        | INSIDE                 | 0.676                                                        | 0.689                          | 1643.14            | 1131.91            | 0.466                          | 1268.83            | 590.91             |
| A_68_P30250396 | chr15:58654501-58654545                           | NM_175212:460            | Tmem65        | INSIDE                 | 0.676                                                        | 3.526                          | 437.07             | 1541.01            | 2.382                          | 444.98             | 1059.97            |
| A_68_P25502139 | chr7:133920603-133920647                          | NM_025347:136            | Ypel3         | INSIDE                 | 0.676                                                        | 0.653                          | 1015.14            | 662.75             | 0.441                          | 977.14             | 431.25             |
| A_68_P24951671 | chr7:4981772-4981816                              | NM_001033383:9817        | Zfp865        | INSIDE                 | 0.676                                                        | 2.134                          | 1420.09            | 3030.21            | 1.443                          | 959.34             | 1383.93            |
| A_68_P24476146 | chr6:56602385-56602429                            |                          |               | Unknown                | 0.676                                                        | 0.543                          | 1276.57            | 693.62             | 0.367                          | 1076.72            | 395.27             |
| A_68_P31062777 | chr17:15080325-15080369                           | NM_001083880:158         | 1600012H06Rik | INSIDE                 | 0.675                                                        | 0.532                          | 2438.49            | 1297.91            | 0.359                          | 1847.23            | 663.96             |
| A_68_P27291407 | chr10:81590879-81590923                           | NM_001163064:143         | AU041133      | INSIDE                 | 0.675                                                        | 0.635                          | 4459.76            | 2831.21            | 0.428                          | 3864.80            | 1654.99            |
| A_68_P24053126 | chr5:123402327-123402371                          | NM_001005866:36194       | Kdm2b         | INSIDE                 | 0.675                                                        | 0.414                          | 2137.11            | 883.85             | 0.279                          | 1817.09            | 507.45             |
| A_68_P30000045 | chr15:8394103-8394149                             | NM_027707:337            | Nipbl         | INSIDE                 | 0.675                                                        | 0.658                          | 1078.92            | 709.99             | 0.444                          | 870.82             | 386.53             |
| A_68_P30650137 | chr16:31933143-31933187                           | NM_172822:-772           | Pigz          | PROMOTER               | 0.675                                                        | 0.597                          | 1360.04            | 812.25             | 0.403                          | 1079.71            | 435.01             |
| A_68_P31162031 | chr17:36116088-36116132                           | NR_028516:-142           | Prr3          | PROMOTER               | 0.675                                                        | 0.586                          | 1125.22            | 658.85             | 0.395                          | 1002.57            | 396.46             |
| A_68_P27688272 | chr11:32247924-32247968                           | NM_177364:136            | Sh3pxd2b      | INSIDE                 | 0.675                                                        | 0.627                          | 3910.49            | 2451.21            | 0.423                          | 2798.88            | 1184.19            |
| A_68_P25807974 | chr8:41984291-41984335                            | NM_001044740:36566       | Slc7a2        | INSIDE                 | 0.675                                                        | 2.142                          | 1073.23            | 2299.31            | 1.445                          | 874.63             | 1263.93            |
| A_68_P28307259 | chr12:28026905-28026949                           | NM_009234:657            | Sox11         | INSIDE                 | 0.675                                                        | 0.461                          | 1436.43            | 662.36             | 0.311                          | 1018.36            | 317.16             |
| A_68_P31106584 | chr17:25970012-25970056                           | NM_019719:272            | Stub1         | INSIDE                 | 0.675                                                        | 0.561                          | 3601.70            | 2019.91            | 0.378                          | 2722.32            | 1030.01            |
| A_68_P23074274 | chr4:85160094-85160138                            | ENSMUST00000147066:-114  |               | PROMOTER               | 0.675                                                        | 0.662                          | 2306.52            | 1527.86            | 0.447                          | 1748.61            | 782.34             |
| A_68_P22953602 | chr4:58925740-58925784                            | NM_172381:-165           | Al314180      | PROMOTER               | 0.674                                                        | 0.578                          | 1405.53            | 812.86             | 0.390                          | 1187.37            | 462.84             |
| A_68_P23873914 | chr5:89194174-89194218                            | NM_007832:159            | Dek           | INSIDE                 | 0.674                                                        | 0.645                          | 2333.25            | 1504.19            | 0.435                          | 1917.54            | 833.61             |
| A_68_P24477005 | chr6:56782354-56782398                            | NM_012056:324            | Fkbp9         | INSIDE                 | 0.674                                                        | 0.521                          | 1127.65            | 587.23             | 0.351                          | 872.46             | 306.27             |
| A_68_P27826628 | chr11:57458677-57458721                           | NM_134189:-245           | Galnt10       | PROMOTER               | 0.674                                                        | 0.655                          | 2338.56            | 1531.00            | 0.442                          | 1777.49            | 784.84             |

| ProbeName      | Target position of probe on CpG island microarray | TargetID                | GeneSymbol    | CpG island Description | Ratio of relative methylation (TiO <sub>2</sub> -NP/Vehicle) | Sham group                     |                    |                    | TiO <sub>2</sub> -H group      |                    |                    |
|----------------|---------------------------------------------------|-------------------------|---------------|------------------------|--------------------------------------------------------------|--------------------------------|--------------------|--------------------|--------------------------------|--------------------|--------------------|
|                |                                                   |                         |               |                        |                                                              | Relative methylation (Cy5/Cy3) | Cy3 signal (Input) | Cy5 signal (MeDIP) | Relative methylation (Cy5/Cy3) | Cy3 signal (Input) | Cy5 signal (MeDIP) |
| A_68_P28291802 | chr12:25516979-25517023                           | NM_001083341:537        | Mboat2        | INSIDE                 | 0.674                                                        | 0.637                          | 1029.89            | 656.28             | 0.430                          | 839.91             | 360.83             |
| A_68_P31826508 | chr18:73732324-73732368                           | NM_001039214:-12        | Mex3c         | PROMOTER               | 0.674                                                        | 0.623                          | 901.53             | 561.54             | 0.420                          | 797.44             | 335.01             |
| A_68_P32823841 | chrX:166435161-166435205                          | NM_183151:117629        | Mid1          | DOWNSTREAM             | 0.674                                                        | 0.640                          | 2516.88            | 1611.81            | 0.432                          | 2567.56            | 1108.99            |
| A_68_P28185950 | chr11:120521651-120521695                         | NM_175263:479           | Notum         | INSIDE                 | 0.674                                                        | 0.485                          | 1372.41            | 665.38             | 0.327                          | 1122.43            | 366.93             |
| A_68_P21117162 | chr2:32597241-32597285                            | NM_013781:20671         | Sh2d3c        | INSIDE                 | 0.674                                                        | 0.460                          | 1720.84            | 791.12             | 0.310                          | 1521.71            | 471.58             |
| A_68_P23610943 | chr5:37380278-37380322                            | NM_011716:-79           | Wfs1          | PROMOTER               | 0.674                                                        | 0.586                          | 1056.70            | 618.78             | 0.395                          | 968.76             | 382.51             |
| A_68_P25701518 | chr8:18950728-18950772                            | NM_001113350:223        | Xkr5          | INSIDE                 | 0.674                                                        | 0.529                          | 1835.33            | 971.49             | 0.357                          | 1616.69            | 577.17             |
| A_68_P25614205 | chr8:3493317-3493361                              | NM_080461:201           | Zfp358        | INSIDE                 | 0.674                                                        | 0.638                          | 3019.06            | 1927.14            | 0.430                          | 2491.40            | 1071.18            |
| A_68_P22970310 | chr4:63071641-63071685                            | NM_001045514:-7183      | Akna          | PROMOTER               | 0.673                                                        | 0.422                          | 1693.42            | 715.39             | 0.284                          | 1284.67            | 365.45             |
| A_68_P21219425 | chr2:52279775-52279819                            | NM_182994:598           | Arl5a         | INSIDE                 | 0.673                                                        | 0.668                          | 982.28             | 656.53             | 0.450                          | 944.34             | 424.84             |
| A_68_P31103787 | chr17:25571314-25571358                           | NM_001163691:-608       | Caena1h       | PROMOTER               | 0.673                                                        | 0.500                          | 1986.83            | 993.12             | 0.337                          | 1598.56            | 538.03             |
| A_68_P28614429 | chr12:88488100-88488144                           | NM_010363:-545          | Gstz1         | PROMOTER               | 0.673                                                        | 0.602                          | 980.32             | 590.44             | 0.405                          | 828.68             | 335.74             |
| A_68_P32672783 | chrX:131136007-131136051                          | NM_019868:204           | Hnrmp2        | INSIDE                 | 0.673                                                        | 2.555                          | 2147.96            | 5488.15            | 1.720                          | 932.06             | 1602.80            |
| A_68_P28452665 | chr12:56701584-56701628                           | NM_020287:1703          | Insm2         | INSIDE                 | 0.673                                                        | 0.526                          | 979.73             | 515.70             | 0.354                          | 800.68             | 283.70             |
| A_68_P20593980 | chr1:129102101-129102145                          | NM_145128:560           | Mgat5         | INSIDE                 | 0.673                                                        | 0.492                          | 2176.46            | 1070.08            | 0.331                          | 1689.23            | 558.60             |
| A_68_P23278938 | chr4:125911658-125911702                          | NM_001145970:21883      | Mtap7d1       | INSIDE                 | 0.673                                                        | 2.423                          | 1312.99            | 3181.86            | 1.630                          | 1040.03            | 1695.01            |
| A_68_P26803471 | chr9:106355871-106355915                          | NM_021567:-295          | Pebp4         | PROMOTER               | 0.673                                                        | 0.484                          | 3334.46            | 1614.78            | 0.326                          | 2598.75            | 846.98             |
| A_68_P26544598 | chr9:57787782-57787826                            | NM_011352:-137          | Sema7a        | PROMOTER               | 0.673                                                        | 0.654                          | 1667.16            | 1091.11            | 0.440                          | 1302.63            | 573.74             |
| A_68_P31487559 | chr18:9958109-9958153                             | NM_153552:-47           | Thoc1         | PROMOTER               | 0.673                                                        | 0.566                          | 1293.21            | 732.15             | 0.381                          | 1183.79            | 450.86             |
| A_68_P24155795 | chr5:144031809-144031857                          | NM_017467:-131          | Zfp316        | PROMOTER               | 0.673                                                        | 0.608                          | 2429.36            | 1477.76            | 0.409                          | 1826.44            | 747.81             |
| A_68_P25027726 | chr7:30303717-30303761                            | ENSMUST00000141713:-485 |               | PROMOTER               | 0.673                                                        | 0.636                          | 929.82             | 591.29             | 0.428                          | 885.19             | 378.78             |
| A_68_P26870478 | chr9:119012095-119012152                          | NM_177117:528           | Dlec1         | INSIDE                 | 0.672                                                        | 0.626                          | 862.25             | 539.44             | 0.420                          | 678.61             | 285.21             |
| A_68_P28914773 | chr13:30075688-30075732                           | NM_010093:2222          | E2f3          | INSIDE                 | 0.672                                                        | 0.608                          | 2516.02            | 1528.53            | 0.408                          | 1884.76            | 769.44             |
| A_68_P25641014 | chr8:9207981-9208030                              | NM_173446:563018        | Fam155a       | INSIDE                 | 0.672                                                        | 3.605                          | 1035.43            | 3732.32            | 2.423                          | 729.95             | 1769.02            |
| A_68_P23977822 | chr5:110536969-110537013                          | NM_145147:226           | Gtbp6         | INSIDE                 | 0.672                                                        | 0.732                          | 2295.58            | 1681.25            | 0.492                          | 1713.24            | 842.97             |
| A_68_P23340286 | chr4:137074294-137074338                          | NM_008305:49599         | Hspg2         | INSIDE                 | 0.672                                                        | 2.609                          | 626.62             | 1635.10            | 1.753                          | 602.12             | 1055.73            |
| A_68_P23334810 | chr4:136158767-136158811                          | NM_133872:-150          | Kdmla         | DIVERGENT_PROMOTER     | 0.672                                                        | 0.651                          | 973.15             | 633.29             | 0.437                          | 864.43             | 378.11             |
| A_68_P27535071 | chr10:126726102-126726146                         | NM_033072:-297          | Mbd6          | DIVERGENT_PROMOTER     | 0.672                                                        | 0.728                          | 1876.37            | 1366.01            | 0.490                          | 1556.32            | 761.93             |
| A_68_P23615748 | chr5:38218732-38218776                            | NM_010835:-2930         | Msx1          | PROMOTER               | 0.672                                                        | 0.680                          | 1232.69            | 838.41             | 0.457                          | 885.30             | 404.77             |
| A_68_P22752866 | chr4:15941305-15941349                            | NM_145950:-302          | Osgin2        | PROMOTER               | 0.672                                                        | 0.377                          | 1735.32            | 653.54             | 0.253                          | 1459.46            | 369.14             |
| A_68_P28513106 | chr12:70259912-70259956                           | NM_009093:239           | Rps29         | INSIDE                 | 0.672                                                        | 0.699                          | 1322.93            | 924.22             | 0.469                          | 960.12             | 450.65             |
| A_68_P23436706 | chr4:154525048-154525092                          | NM_011385:71574         | Ski           | DOWNSTREAM             | 0.672                                                        | 0.643                          | 1075.26            | 691.70             | 0.432                          | 852.30             | 368.42             |
| A_68_P27340415 | chr10:90634726-90634770                           | NM_001080129:-421       | Tmpo          | PROMOTER               | 0.672                                                        | 0.700                          | 1173.66            | 822.08             | 0.471                          | 1031.83            | 485.61             |
| A_68_P24007967 | chr5:115577345-115577390                          | NM_175352:7617          | Unc119b       | INSIDE                 | 0.672                                                        | 4.107                          | 3752.64            | 15412.48           | 2.761                          | 2353.45            | 6498.28            |
| A_68_P24643833 | chr6:92164652-92164696                            | NM_030081:131           | Zfyve20       | INSIDE                 | 0.672                                                        | 0.590                          | 4597.05            | 2713.97            | 0.396                          | 3662.02            | 1451.90            |
| A_68_P28788256 | chr13:3477776-3477820                             | NR_015522:250           | 2810429104Rik | INSIDE                 | 0.671                                                        | 0.628                          | 3107.97            | 1952.97            | 0.422                          | 2423.23            | 1021.56            |
| A_68_P28724525 | chr12:109155176-109155220                         | NM_001079883:86426      | Bcl11b        | INSIDE                 | 0.671                                                        | 2.821                          | 1042.14            | 2940.16            | 1.893                          | 903.58             | 1710.57            |
| A_68_P21762929 | chr2:154718235-154718279                          | NM_026030:386           | Eif2s2        | INSIDE                 | 0.671                                                        | 0.537                          | 1062.37            | 570.97             | 0.361                          | 785.70             | 283.53             |
| A_68_P26313786 | chr9:13632306-13632350                            | NM_176836:158           | Fam76b        | INSIDE                 | 0.671                                                        | 0.599                          | 2504.57            | 1500.57            | 0.402                          | 2098.29            | 843.62             |
| A_68_P22791942 | chr4:25726695-2572739                             | NM_010243:434           | Fut9          | INSIDE                 | 0.671                                                        | 0.686                          | 1460.39            | 1001.93            | 0.460                          | 1132.65            | 521.24             |
| A_68_P24449526 | chr6:52210086-52210130                            | NM_008264:766           | Hoxa13        | INSIDE                 | 0.671                                                        | 0.615                          | 1502.30            | 923.27             | 0.412                          | 1156.60            | 477.07             |
| A_68_P27282937 | chr10:79858218-79858268                           | NM_013595:3982          | Mbd3          | INSIDE                 | 0.671                                                        | 2.430                          | 1160.12            | 2819.24            | 1.629                          | 866.65             | 1412.13            |
| A_68_P21706648 | chr2:144157388-144157432                          | NM_152947:-312          | Ovol2         | PROMOTER               | 0.671                                                        | 0.491                          | 1783.53            | 876.51             | 0.330                          | 1488.88            | 490.83             |
| A_68_P22356949 | chr3:97692477-97692521                            | NM_001039376:132        | Pde4dip       | INSIDE                 | 0.671                                                        | 0.598                          | 1195.17            | 714.52             | 0.401                          | 948.92             | 380.51             |
| A_68_P29054896 | chr13:55516436-55516480                           | NM_029303:135           | Pfh3          | INSIDE                 | 0.671                                                        | 0.456                          | 2073.06            | 945.06             | 0.306                          | 1519.38            | 464.51             |
| A_68_P31142309 | chr17:31992389-31992433                           | NM_010831:327           | Sik1          | INSIDE                 | 0.671                                                        | 0.729                          | 4139.42            | 3018.26            | 0.490                          | 3216.83            | 1574.91            |
| A_68_P20087503 | chr1:23263704-23263748                            | ENSMUST00000097807:-481 |               | PROMOTER               | 0.671                                                        | 0.499                          | 1977.17            | 985.63             | 0.335                          | 1647.42            | 551.12             |
| A_68_P32678565 | chrX:132420534-132420578                          | NM_001098222:167        | Bhlhb9        | INSIDE                 | 0.670                                                        | 2.230                          | 1544.96            | 3445.00            | 1.494                          | 797.82             | 1192.24            |
| A_68_P30778320 | chr16:55905833-55905877                           | NM_028815:29107         | Cep97         | INSIDE                 | 0.670                                                        | 2.862                          | 380.98             | 1090.21            | 1.918                          | 356.28             | 683.46             |
| A_68_P27564953 | chr11:5688605-5688649                             | NM_001146308:141        | Dbn1          | INSIDE                 | 0.670                                                        | 0.695                          | 2021.36            | 1403.86            | 0.465                          | 1567.56            | 728.93             |
| A_68_P24607366 | chr6:85911499-85911543                            | NM_028099:141           | Dusp11        | INSIDE                 | 0.670                                                        | 0.621                          | 866.20             | 537.54             | 0.416                          | 726.14             | 302.05             |

| ProbeName      | Target position of probe on CpG island microarray | TargetID            | GeneSymbol | CpG island Description | Ratio of relative methylation (TiO <sub>2</sub> -NP/Vehicle) | Sham group                     |                    |                    | TiO <sub>2</sub> -H group      |                    |                    |
|----------------|---------------------------------------------------|---------------------|------------|------------------------|--------------------------------------------------------------|--------------------------------|--------------------|--------------------|--------------------------------|--------------------|--------------------|
|                |                                                   |                     |            |                        |                                                              | Relative methylation (Cy5/Cy3) | Cy3 signal (Input) | Cy5 signal (MeDIP) | Relative methylation (Cy5/Cy3) | Cy3 signal (Input) | Cy5 signal (MeDIP) |
| A_68_P28923679 | chr13:31651001-31651045                           | NM_008239:984       | Foxq1      | INSIDE                 | 0.670                                                        | 0.669                          | 2172.00            | 1452.05            | 0.448                          | 1561.09            | 698.77             |
| A_68_P26165492 | chr8:113426392-113426436                          | NM_181666:-55       | Fuk        | PROMOTER               | 0.670                                                        | 0.566                          | 1644.99            | 931.16             | 0.379                          | 1458.43            | 553.00             |
| A_68_P31116576 | chr17:27610068-27610113                           | NM_001013385:30159  | Grm4       | INSIDE                 | 0.670                                                        | 3.990                          | 4281.32            | 17081.76           | 2.671                          | 2957.50            | 7900.55            |
| A_68_P27924562 | chr11:74979450-74979494                           | NM_001098203:2182   | Hic1       | INSIDE                 | 0.670                                                        | 0.487                          | 1104.94            | 537.62             | 0.326                          | 842.19             | 274.44             |
| A_68_P31108916 | chr17:26340305-26340349                           | NM_001081069:420    | Rgs11      | INSIDE                 | 0.670                                                        | 0.588                          | 1233.03            | 724.99             | 0.394                          | 1057.55            | 416.67             |
| A_68_P25581865 | chr7:147222114-147222158                          | NM_133755:113       | Tube2      | INSIDE                 | 0.670                                                        | 0.693                          | 2465.37            | 1707.82            | 0.464                          | 2077.08            | 963.56             |
| A_68_P28087343 | chr11:103673531-103673575                         | NM_009521:38064     | Wnt3       | INSIDE                 | 0.670                                                        | 4.641                          | 2433.84            | 11295.21           | 3.107                          | 1734.84            | 5390.88            |
| A_68_P20826056 | chr1:173016015-173016059                          | BC100368:10398      |            | DOWNSTREAM             | 0.670                                                        | 0.564                          | 1640.33            | 925.20             | 0.378                          | 1252.34            | 473.36             |
| A_68_P28836956 | chr13:14156155-14156199                           | NM_194262:118       | Arid4b     | INSIDE                 | 0.669                                                        | 0.690                          | 1919.69            | 1325.30            | 0.462                          | 1563.90            | 722.57             |
| A_68_P25083581 | chr7:50931799-50931843                            | NM_145582:4420      | Ctu1       | INSIDE                 | 0.669                                                        | 2.401                          | 2120.58            | 5091.69            | 1.606                          | 1452.51            | 2332.23            |
| A_68_P23335796 | chr4:136327079-136327123                          | NM_010142:64750     | Ephb2      | INSIDE                 | 0.669                                                        | 2.233                          | 1845.17            | 4120.32            | 1.493                          | 1478.72            | 2207.49            |
| A_68_P23968410 | chr5:108150495-108150539                          | NM_010278:2847      | Gfi1       | INSIDE                 | 0.669                                                        | 0.649                          | 1001.29            | 649.95             | 0.434                          | 891.94             | 387.34             |
| A_68_P21339415 | chr2:74601471-74601515                            | NM_010467:456       | Hoxd1      | INSIDE                 | 0.669                                                        | 0.708                          | 2539.99            | 1797.15            | 0.474                          | 2083.43            | 986.57             |
| A_68_P29356812 | chr13:117100315-117100359                         | NM_021459:-440      | Isl1       | PROMOTER               | 0.669                                                        | 0.613                          | 919.63             | 563.65             | 0.410                          | 921.77             | 377.86             |
| A_68_P28549422 | chr12:76697372-76697416                           | NM_012024:-207      | Ppp2r5e    | PROMOTER               | 0.669                                                        | 0.614                          | 4111.37            | 2525.91            | 0.411                          | 3356.09            | 1379.87            |
| A_68_P27478502 | chr10:116386947-116386991                         | NM_001003950:468    | Rab3ip     | INSIDE                 | 0.669                                                        | 0.509                          | 1179.86            | 600.15             | 0.340                          | 942.38             | 320.46             |
| A_68_P26714893 | chr9:89803729-89803773                            | NM_001039655:-862   | Rasgrf1    | PROMOTER               | 0.669                                                        | 0.659                          | 856.26             | 564.24             | 0.441                          | 715.42             | 315.48             |
| A_68_P20149051 | chr1:36614518-36614562                            | NM_001126047:686    | Sema4c     | INSIDE                 | 0.669                                                        | 0.645                          | 1130.29            | 728.96             | 0.431                          | 949.38             | 409.44             |
| A_68_P31120331 | chr17:28216591-28216635                           | NM_013687:917       | Top11      | INSIDE                 | 0.669                                                        | 0.714                          | 1324.09            | 945.25             | 0.477                          | 1091.45            | 521.14             |
| A_68_P31323661 | chr17:69732210-69732254                           | NM_009547:-1085     | Zfp161     | PROMOTER               | 0.669                                                        | 0.661                          | 1152.64            | 761.38             | 0.442                          | 970.05             | 428.87             |
| A_68_P31744350 | chr18:58996079-58996123                           | NM_175506:-317      | Adams19    | PROMOTER               | 0.668                                                        | 0.581                          | 1351.03            | 784.35             | 0.388                          | 1235.00            | 478.76             |
| A_68_P21617370 | chr2:127952278-127952322                          | NM_009754:527       | Bel2l11    | INSIDE                 | 0.668                                                        | 0.557                          | 1199.21            | 667.56             | 0.372                          | 939.33             | 349.06             |
| A_68_P27089721 | chr10:41239063-41239107                           | NM_016898:-221      | Cd164      | PROMOTER               | 0.668                                                        | 0.442                          | 1478.47            | 654.22             | 0.295                          | 1128.98            | 333.50             |
| A_68_P26665705 | chr9:79566838-79566882                            | NM_007730:-375      | Col12a1    | PROMOTER               | 0.668                                                        | 0.695                          | 3230.21            | 2245.78            | 0.464                          | 2319.51            | 1077.35            |
| A_68_P28120302 | chr11:109582605-109582649                         | NM_153782:944       | Fam20a     | INSIDE                 | 0.668                                                        | 0.580                          | 1847.27            | 1072.02            | 0.388                          | 1591.69            | 616.80             |
| A_68_P21229089 | chr2:54288691-54288735                            | NM_173030:-85       | Galnt13    | PROMOTER               | 0.668                                                        | 0.640                          | 1762.61            | 1128.40            | 0.428                          | 1599.03            | 684.31             |
| A_68_P27915399 | chr11:72951333-72951377                           | NM_010353:442       | Gsg2       | INSIDE                 | 0.668                                                        | 0.643                          | 1027.53            | 660.99             | 0.430                          | 834.13             | 358.28             |
| A_68_P23807228 | chr5:75472072-75472116                            | NM_133256:469       | Gsx2       | INSIDE                 | 0.668                                                        | 0.707                          | 2024.06            | 1430.51            | 0.472                          | 1638.57            | 773.77             |
| A_68_P31935408 | chr19:6531356-6531400                             | NM_001205234:112641 | Nrxn2      | INSIDE                 | 0.668                                                        | 0.583                          | 1603.83            | 935.12             | 0.389                          | 1334.63            | 519.47             |
| A_68_P25406004 | chr7:116226565-116226609                          | NM_001038624:252    | Ric3       | INSIDE                 | 0.668                                                        | 0.517                          | 1077.58            | 556.82             | 0.345                          | 787.70             | 272.01             |
| A_68_P26896298 | chr9:123587851-123587896                          | NM_139142:77        | Slc6a20a   | INSIDE                 | 0.668                                                        | 0.415                          | 3054.71            | 1267.00            | 0.277                          | 2432.20            | 673.39             |
| A_68_P22311543 | chr3:87862306-87862350                            | NM_144897:89        | Apoa1bp    | INSIDE                 | 0.667                                                        | 0.475                          | 2288.20            | 1085.86            | 0.317                          | 1695.77            | 537.05             |
| A_68_P27534325 | chr10:126602946-126602990                         | NM_027739:82        | B4galnt1   | INSIDE                 | 0.667                                                        | 0.488                          | 1792.27            | 874.65             | 0.326                          | 1549.71            | 504.52             |
| A_68_P30588535 | chr16:20621603-20621647                           | NM_028420:-273      | Camk2n2    | DIVERGENT_PROMOTER     | 0.667                                                        | 0.443                          | 1624.09            | 719.47             | 0.295                          | 1327.82            | 392.09             |
| A_68_P26019094 | chr8:86794146-86794190                            | NM_026350:91        | Ccdc130    | INSIDE                 | 0.667                                                        | 0.639                          | 2432.78            | 1555.21            | 0.426                          | 1849.34            | 788.59             |
| A_68_P21318133 | chr2:71050301-71050345                            | NM_001198877:320    | Dync1i2    | INSIDE                 | 0.667                                                        | 0.585                          | 905.85             | 529.99             | 0.390                          | 735.70             | 287.24             |
| A_68_P26765225 | chr9:99530050-99530094                            | NM_028258:59        | Dzip11     | INSIDE                 | 0.667                                                        | 0.573                          | 1786.88            | 1024.12            | 0.382                          | 1503.61            | 574.42             |
| A_68_P32135375 | chr19:45005538-45005582                           | NM_001081225:-48    | Fam178a    | PROMOTER               | 0.667                                                        | 0.425                          | 1610.73            | 685.16             | 0.284                          | 1193.66            | 338.90             |
| A_68_P21517947 | chr2:109757830-109757874                          | NM_172671:49        | Lgr4       | INSIDE                 | 0.667                                                        | 0.625                          | 1149.45            | 718.29             | 0.417                          | 966.96             | 402.85             |
| A_68_P26758565 | chr9:98325194-98325238                            | NM_011254:1837      | Rbp1       | INSIDE                 | 0.667                                                        | 0.517                          | 2718.74            | 1405.67            | 0.345                          | 2031.16            | 700.18             |
| A_68_P25962580 | chr8:75247857-75247901                            | NM_001113248:692    | Sin3b      | INSIDE                 | 0.667                                                        | 0.564                          | 1820.03            | 1027.17            | 0.376                          | 1543.99            | 580.83             |
| A_68_P27226084 | chr10:69285147-69285191                           | NM_146005:288713    | Ank3       | INSIDE                 | 0.666                                                        | 2.148                          | 2256.07            | 4846.37            | 1.430                          | 1692.90            | 2420.42            |
| A_68_P24205537 | chr6:4550857-4550901                              | NM_145398:-187      | Casd1      | PROMOTER               | 0.666                                                        | 0.598                          | 1044.51            | 624.91             | 0.398                          | 851.82             | 339.45             |
| A_68_P27176102 | chr10:60150451-60150495                           | NM_023370:8766      | Cdh23      | INSIDE                 | 0.666                                                        | 0.559                          | 970.33             | 542.53             | 0.373                          | 843.33             | 314.16             |
| A_68_P21639430 | chr2:132089195-132089239                          | NM_138651:224       | Cds2       | INSIDE                 | 0.666                                                        | 0.568                          | 964.42             | 547.35             | 0.378                          | 782.88             | 295.74             |
| A_68_P28688787 | chr12:103214342-103214386                         | NM_016856:181       | Cpsf2      | INSIDE                 | 0.666                                                        | 0.622                          | 2682.38            | 1667.29            | 0.414                          | 2038.61            | 843.77             |
| A_68_P25616894 | chr8:4258857-4258901                              | NM_183315:396       | Cttnx1     | INSIDE                 | 0.666                                                        | 0.634                          | 1584.26            | 1005.21            | 0.422                          | 1240.33            | 523.97             |
| A_68_P33007791 | chr4_random:128451-128495                         | NM_001033326:18671  | Dhrxx      | INSIDE                 | 0.666                                                        | 2.468                          | 7810.77            | 19279.26           | 1.644                          | 5480.38            | 9007.71            |
| A_68_P29683688 | chr14:67853251-67853295                           | NM_010095:1144      | Ebf2       | INSIDE                 | 0.666                                                        | 0.603                          | 1322.62            | 797.41             | 0.401                          | 1084.90            | 435.48             |
| A_68_P22291219 | chr3:84284726-84284770                            | NM_001033301:-387   | Fhdc1      | PROMOTER               | 0.666                                                        | 0.447                          | 2105.73            | 940.81             | 0.297                          | 1601.10            | 476.27             |
| A_68_P32026439 | chr19:24975135-24975179                           | NM_008022:643       | Foxd4      | INSIDE                 | 0.666                                                        | 0.698                          | 2978.11            | 2077.88            | 0.465                          | 2138.93            | 993.63             |



| ProbeName      | Target position of probe on CpG island microarray | TargetID                | GeneSymbol    | CpG island Description | Ratio of relative methylation (TiO <sub>2</sub> -NP/Vehicle) | Sham group                     |                    |                    | TiO <sub>2</sub> -H group      |                    |                    |
|----------------|---------------------------------------------------|-------------------------|---------------|------------------------|--------------------------------------------------------------|--------------------------------|--------------------|--------------------|--------------------------------|--------------------|--------------------|
|                |                                                   |                         |               |                        |                                                              | Relative methylation (Cy5/Cy3) | Cy3 signal (Input) | Cy5 signal (MeDIP) | Relative methylation (Cy5/Cy3) | Cy3 signal (Input) | Cy5 signal (MeDIP) |
| A_68_P24868563 | chr6:135683062-135683116                          | NM_008171:440441        | Grin2b        | INSIDE                 | 0.666                                                        | 3.710                          | 1775.75            | 6588.79            | 2.471                          | 1180.46            | 2916.88            |
| A_68_P25270819 | chr7:88358500-88358544                            | NM_008803:-167          | Pde8a         | PROMOTER               | 0.666                                                        | 0.579                          | 1813.83            | 1049.79            | 0.386                          | 1581.86            | 609.83             |
| A_68_P27110003 | chr10:44877999-44878045                           | NM_011156:91003         | Prep          | INSIDE                 | 0.666                                                        | 2.654                          | 526.78             | 1397.88            | 1.768                          | 385.35             | 681.48             |
| A_68_P31232584 | chr17:51318828-51318872                           | NM_028162:-176          | Tbc1d5        | PROMOTER               | 0.666                                                        | 0.618                          | 1991.74            | 1231.86            | 0.412                          | 1666.78            | 686.17             |
| A_68_P26593987 | chr9:66439772-66439816                            | NM_144937:993           | Usp3          | INSIDE                 | 0.666                                                        | 0.520                          | 1052.45            | 547.37             | 0.347                          | 874.53             | 303.08             |
| A_68_P28708614 | chr12:106575757-106575801                         | ENSMUST00000138649:576  |               | INSIDE                 | 0.666                                                        | 0.541                          | 1331.24            | 720.65             | 0.361                          | 1005.08            | 362.46             |
| A_68_P26913681 | chr10:6079865-6079909                             | NM_031185:326           | Akap12        | INSIDE                 | 0.665                                                        | 0.659                          | 1348.73            | 889.00             | 0.438                          | 1308.06            | 573.28             |
| A_68_P31948448 | chr19:10175771-10175815                           | NM_019699:201           | Fads2         | INSIDE                 | 0.665                                                        | 0.622                          | 1068.35            | 664.43             | 0.414                          | 824.89             | 341.19             |
| A_68_P25827401 | chr8:46036029-46036073                            | NM_001081286:489        | Fat1          | INSIDE                 | 0.665                                                        | 2.649                          | 1533.08            | 4060.58            | 1.763                          | 1253.18            | 2208.91            |
| A_68_P27839121 | chr11:59623157-59623201                           | NM_146018:97            | Flcn          | INSIDE                 | 0.665                                                        | 0.491                          | 2653.43            | 1302.98            | 0.327                          | 1880.19            | 614.39             |
| A_68_P26466893 | chr9:44113911-44113955                            | NM_172162:-178          | Hinfp         | PROMOTER               | 0.665                                                        | 0.436                          | 1731.62            | 755.54             | 0.290                          | 1237.93            | 359.38             |
| A_68_P25474217 | chr7:128643986-128644031                          | NM_001081327:108199     | Hs3st2        | INSIDE                 | 0.665                                                        | 2.244                          | 1612.51            | 3618.03            | 1.493                          | 1081.08            | 1613.60            |
| A_68_P33003685 | chr1_random:342475-342519                         | NM_177389:417           | Mia3          | INSIDE                 | 0.665                                                        | 3.332                          | 950.43             | 3167.27            | 2.217                          | 815.73             | 1808.72            |
| A_68_P22339047 | chr3:94247097-94247141                            | NM_030116:-139          | Mrp19         | DIVERGENT_PROMOTER     | 0.665                                                        | 0.700                          | 1718.75            | 1203.68            | 0.466                          | 1528.25            | 711.60             |
| A_68_P29110672 | chr13:68720676-68720720                           | NM_172480:300           | Mtrr          | INSIDE                 | 0.665                                                        | 0.641                          | 1667.98            | 1068.62            | 0.426                          | 1104.70            | 470.95             |
| A_68_P26521206 | chr9:53345098-53345142                            | NM_001081152:-31        | Npat          | DIVERGENT_PROMOTER     | 0.665                                                        | 0.515                          | 1476.63            | 761.04             | 0.343                          | 1089.94            | 373.51             |
| A_68_P30473047 | chr15:97923923-97923967                           | NM_144851:-108          | Senp1         | PROMOTER               | 0.665                                                        | 0.647                          | 1402.42            | 907.98             | 0.430                          | 1117.88            | 481.06             |
| A_68_P25017446 | chr7:28258643-28258687                            | NM_133210:-194          | Sertad3       | PROMOTER               | 0.665                                                        | 0.425                          | 1727.41            | 734.53             | 0.283                          | 1521.32            | 430.17             |
| A_68_P27628894 | chr11:19820464-19820508                           | NM_033523:-3958         | Spred2        | PROMOTER               | 0.665                                                        | 2.904                          | 294.59             | 855.42             | 1.932                          | 379.16             | 732.65             |
| A_68_P30244924 | chr15:57743688-57743732                           | NM_001167679:-43        | Wdr67         | PROMOTER               | 0.665                                                        | 0.704                          | 1461.45            | 1028.98            | 0.468                          | 1213.96            | 568.55             |
| A_68_P23611948 | chr5:37554605-37554649                            | AK036147:539            |               | INSIDE                 | 0.665                                                        | 0.570                          | 1301.86            | 742.67             | 0.379                          | 1075.42            | 408.09             |
| A_68_P23255467 | chr4:120887341-120887385                          | ENSMUST00000056635:327  |               | INSIDE                 | 0.665                                                        | 0.704                          | 4992.08            | 3516.16            | 0.468                          | 3955.74            | 1853.07            |
| A_68_P31305849 | chr17:66729099-66729143                           | NM_001114098:69970      | 1110012J17Rik | INSIDE                 | 0.664                                                        | 2.326                          | 1921.71            | 4469.38            | 1.544                          | 1357.88            | 2095.95            |
| A_68_P31632918 | chr18:38410055-38410099                           | NR_027904:143           | 1700086O06Rik | INSIDE                 | 0.664                                                        | 0.533                          | 1071.74            | 570.96             | 0.354                          | 893.60             | 316.12             |
| A_68_P24908452 | chr6:143048181-143048225                          | NM_001109688:425        | 5730419I09Rik | INSIDE                 | 0.664                                                        | 0.479                          | 1960.53            | 938.78             | 0.318                          | 1721.28            | 547.51             |
| A_68_P30284265 | chr15:64753968-64754012                           | NM_009623:-132          | Adey8         | PROMOTER               | 0.664                                                        | 0.712                          | 2819.75            | 2007.06            | 0.472                          | 2311.08            | 1091.54            |
| A_68_P28923675 | chr13:31650511-31650560                           | NM_008239:497           | Foxq1         | INSIDE                 | 0.664                                                        | 0.607                          | 1112.82            | 675.23             | 0.403                          | 946.63             | 381.14             |
| A_68_P20451396 | chr1:94727977-94728021                            | NM_016696:-264          | Gpc1          | PROMOTER               | 0.664                                                        | 0.381                          | 2725.04            | 1037.67            | 0.253                          | 2281.88            | 577.30             |
| A_68_P28727298 | chr12:109557168-109557212                         | NM_001044380:12711      | Hhip11        | INSIDE                 | 0.664                                                        | 4.705                          | 1516.50            | 7134.36            | 3.125                          | 1142.63            | 3570.46            |
| A_68_P21107803 | chr2:31101353-31101397                            | NM_019681:-68           | Nes1          | PROMOTER               | 0.664                                                        | 0.440                          | 1396.79            | 614.35             | 0.292                          | 1184.54            | 345.76             |
| A_68_P31127304 | chr17:29459396-29459440                           | NM_023734:3592          | Pi16          | INSIDE                 | 0.664                                                        | 3.213                          | 1425.74            | 4581.14            | 2.133                          | 1020.44            | 2176.48            |
| A_68_P27682732 | chr11:31271512-31271556                           | NM_011491:-1473         | Ste2          | PROMOTER               | 0.664                                                        | 0.474                          | 2672.53            | 1266.60            | 0.315                          | 1977.73            | 622.37             |
| A_68_P30542067 | chr16:10395304-10395348                           | NM_001099275:215        | Tekt5         | INSIDE                 | 0.664                                                        | 0.689                          | 1815.48            | 1251.03            | 0.458                          | 1387.89            | 635.07             |
| A_68_P24136182 | chr5:140023230-140023274                          | NM_013702:3401          | Unex          | INSIDE                 | 0.664                                                        | 0.389                          | 1861.09            | 723.76             | 0.258                          | 1418.20            | 366.30             |
| A_68_P31203277 | chr17:45942900-45942944                           | AK053380:16350          |               | DOWNSTREAM             | 0.664                                                        | 0.615                          | 1171.19            | 720.86             | 0.409                          | 1061.95            | 433.86             |
| A_68_P31922428 | chr19:4305887-4305931                             | NM_130863:47            | Adrbk1        | INSIDE                 | 0.663                                                        | 0.669                          | 1755.30            | 1173.42            | 0.443                          | 1417.95            | 628.83             |
| A_68_P30502657 | chr15:103013103-103013147                         | NM_001110216:32659      | Cbx5          | DOWNSTREAM             | 0.663                                                        | 0.512                          | 1157.92            | 592.32             | 0.339                          | 1091.68            | 370.28             |
| A_68_P28776182 | chr12:119082285-119082329                         | NM_146040:-27           | Cdea7l        | PROMOTER               | 0.663                                                        | 0.391                          | 1820.37            | 710.99             | 0.259                          | 1573.66            | 407.71             |
| A_68_P25949230 | chr8:72520586-72520630                            | NM_001113345:-330       | Gatad2a       | PROMOTER               | 0.663                                                        | 0.589                          | 1082.30            | 637.93             | 0.391                          | 865.19             | 338.15             |
| A_68_P26508624 | chr9:51087195-51087239                            | NM_001195681:-557       | Gm684         | PROMOTER               | 0.663                                                        | 0.738                          | 2252.09            | 1662.84            | 0.489                          | 1660.64            | 822.31             |
| A_68_P28635712 | chr12:92826632-92826677                           | NM_031391:1435          | Gtf2a1        | INSIDE                 | 0.663                                                        | 0.683                          | 1034.83            | 706.39             | 0.453                          | 948.48             | 429.29             |
| A_68_P25101371 | chr7:54051634-54051678                            | NM_008186:193           | Gtf2h1        | INSIDE                 | 0.663                                                        | 0.589                          | 1266.18            | 745.54             | 0.391                          | 959.92             | 374.94             |
| A_68_P27340037 | chr10:90564728-90564779                           | NM_027078:18970         | Ikbip         | INSIDE                 | 0.663                                                        | 2.282                          | 1345.04            | 3069.80            | 1.513                          | 1012.31            | 1531.59            |
| A_68_P31383812 | chr17:80976478-80976522                           | NM_001081357:150933     | Map4k3        | DOWNSTREAM             | 0.663                                                        | 0.648                          | 1188.54            | 770.31             | 0.430                          | 947.73             | 407.50             |
| A_68_P24118745 | chr5:136438525-136438569                          | NM_001160366:11800      | Srerb4d       | INSIDE                 | 0.663                                                        | 0.660                          | 4244.66            | 2802.70            | 0.438                          | 3021.76            | 1323.39            |
| A_68_P22728294 | chr4:11083669-11083713                            | NM_001199105:103        | Trp53inp1     | INSIDE                 | 0.663                                                        | 0.473                          | 1751.11            | 828.77             | 0.314                          | 1542.51            | 484.14             |
| A_68_P24688741 | chr6:99828483-99828532                            | ENSMUST00000074759:-80  |               | PROMOTER               | 0.663                                                        | 2.630                          | 817.49             | 2150.01            | 1.743                          | 645.29             | 1125.02            |
| A_68_P22148833 | chr3:54437305-54437349                            | ENSMUST00000172420:1966 |               | INSIDE                 | 0.663                                                        | 2.541                          | 557.80             | 1417.12            | 1.683                          | 505.96             | 851.73             |
| A_68_P25610226 | chr7:152128254-152128298                          | NM_007631:-2446         | Cend1         | PROMOTER               | 0.662                                                        | 0.407                          | 1574.16            | 639.92             | 0.269                          | 1284.45            | 345.41             |
| A_68_P28067607 | chr11:100216626-100216670                         | NM_010404:807           | Hap1          | INSIDE                 | 0.662                                                        | 0.663                          | 931.14             | 617.47             | 0.439                          | 778.26             | 341.72             |
| A_68_P28043569 | chr11:96160876-96160920                           | NM_008269:414           | Hoxb6         | INSIDE                 | 0.662                                                        | 0.559                          | 1057.54            | 590.81             | 0.370                          | 903.37             | 334.06             |

| ProbeName      | Target position of probe on CpG island microarray | TargetID           | GeneSymbol    | CpG island Description | Ratio of relative methylation (TiO <sub>2</sub> -NP/Vehicle) | Sham group                     |                    |                    | TiO <sub>2</sub> -H group      |                    |                    |
|----------------|---------------------------------------------------|--------------------|---------------|------------------------|--------------------------------------------------------------|--------------------------------|--------------------|--------------------|--------------------------------|--------------------|--------------------|
|                |                                                   |                    |               |                        |                                                              | Relative methylation (Cy5/Cy3) | Cy3 signal (Input) | Cy5 signal (MeDIP) | Relative methylation (Cy5/Cy3) | Cy3 signal (Input) | Cy5 signal (MeDIP) |
| A_68_P32095250 | chr19:37450569-37450613                           | NM_010615:-302     | Kif11         | PROMOTER               | 0.662                                                        | 0.600                          | 936.98             | 561.73             | 0.397                          | 721.13             | 286.01             |
| A_68_P30433474 | chr15:90880547-90880591                           | NM_001109040:-189  | Kif21a        | PROMOTER               | 0.662                                                        | 0.603                          | 1332.70            | 803.69             | 0.399                          | 1122.47            | 448.16             |
| A_68_P20454694 | chr1:95202421-95202465                            | NM_178051:5        | Mterfd2       | INSIDE                 | 0.662                                                        | 0.577                          | 1626.22            | 938.73             | 0.382                          | 1052.21            | 401.83             |
| A_68_P21952653 | chr3:13472808-13472852                            | NM_001163328:-1176 | Raly1         | INSIDE                 | 0.662                                                        | 0.669                          | 2071.17            | 1384.94            | 0.442                          | 1586.41            | 701.86             |
| A_68_P25094661 | chr7:52968968-52969012                            | NM_020011:1587     | Sphk2         | INSIDE                 | 0.662                                                        | 2.561                          | 1056.76            | 2706.28            | 1.695                          | 892.29             | 1512.06            |
| A_68_P30342960 | chr15:75447074-75447118                           | NM_001044718:-18   | Zfp41         | PROMOTER               | 0.662                                                        | 0.658                          | 5546.32            | 3649.34            | 0.436                          | 3908.26            | 1702.44            |
| A_68_P25417176 | chr7:118266442-118266486                          | NR_015573:-275     | 1700012D14Rik | PROMOTER               | 0.661                                                        | 0.473                          | 1157.80            | 547.26             | 0.312                          | 1034.55            | 323.09             |
| A_68_P25375960 | chr7:109044724-109044768                          | NM_027532:-182     | 3200002M19Rik | PROMOTER               | 0.661                                                        | 0.649                          | 1096.91            | 712.10             | 0.429                          | 1002.42            | 430.31             |
| A_68_P31524846 | chr18:16966832-16966876                           | NM_007664:704      | Cdh2          | INSIDE                 | 0.661                                                        | 0.602                          | 908.10             | 546.70             | 0.398                          | 793.88             | 315.98             |
| A_68_P30677441 | chr16:36828287-36828331                           | NM_001113401:37    | Eaf2          | INSIDE                 | 0.661                                                        | 0.640                          | 806.69             | 516.26             | 0.423                          | 706.70             | 299.12             |
| A_68_P28839394 | chr13:14705133-14705177                           | NM_029271:150      | Mrp132        | INSIDE                 | 0.661                                                        | 0.567                          | 912.05             | 517.10             | 0.375                          | 814.12             | 305.27             |
| A_68_P27539152 | chr10:127472516-127472600                         | NM_001113199:137   | Naca          | INSIDE                 | 0.661                                                        | 0.541                          | 1584.53            | 857.07             | 0.357                          | 1252.56            | 447.78             |
| A_68_P21628852 | chr2:130099893-130099937                          | NM_024193:-233     | Nop56         | PROMOTER               | 0.661                                                        | 0.545                          | 1054.58            | 575.08             | 0.360                          | 795.64             | 286.66             |
| A_68_P26365996 | chr9:25060486-25060530                            | NM_001205367:469   | Septin7       | INSIDE                 | 0.661                                                        | 0.556                          | 1312.34            | 729.21             | 0.367                          | 1069.71            | 392.71             |
| A_68_P25092883 | chr7:52650953-52650997                            | NM_009224:43       | Snrnp70       | INSIDE                 | 0.661                                                        | 0.674                          | 1737.70            | 1170.49            | 0.445                          | 1471.32            | 655.14             |
| A_68_P32203589 | chr19:56948890-56948934                           | NM_172840:7        | Vwa2          | INSIDE                 | 0.661                                                        | 0.555                          | 1557.43            | 863.66             | 0.367                          | 1261.95            | 462.79             |
| A_68_P30401337 | chr15:85374375-85374419                           | NM_001163634:34104 | Wnt7b         | INSIDE                 | 0.661                                                        | 2.597                          | 787.40             | 2045.23            | 1.717                          | 678.17             | 1164.31            |
| A_68_P27534515 | chr10:126627015-126627059                         | NM_001166413:-157  | Arhgef25      | PROMOTER               | 0.660                                                        | 0.701                          | 1586.51            | 1112.37            | 0.463                          | 1074.10            | 497.23             |
| A_68_P21576978 | chr2:120557105-120557149                          | NM_026891:127      | Cdan1         | INSIDE                 | 0.660                                                        | 0.514                          | 2920.88            | 1501.20            | 0.339                          | 2432.31            | 825.35             |
| A_68_P28076812 | chr11:101846260-101846304                         | NM_028207:-177     | Dusp3         | DIVERGENT_PROMOTER     | 0.660                                                        | 0.493                          | 1421.69            | 701.35             | 0.325                          | 1094.23            | 356.06             |
| A_68_P21109954 | chr2:31428423-31428467                            | NM_001033389:200   | Fubp3         | INSIDE                 | 0.660                                                        | 0.417                          | 1273.80            | 531.61             | 0.275                          | 1152.89            | 317.49             |
| A_68_P23274589 | chr4:125167651-125167695                          | NM_001081097:-402  | Grik3         | PROMOTER               | 0.660                                                        | 0.456                          | 1142.11            | 521.06             | 0.301                          | 986.64             | 297.01             |
| A_68_P27083090 | chr10:39977304-39977348                           | NM_026113:145      | Gtf3e6        | INSIDE                 | 0.660                                                        | 0.706                          | 1785.25            | 1261.18            | 0.466                          | 1542.72            | 718.81             |
| A_68_P22375208 | chr3:101255145-101255189                          | NM_207205:74119    | Igsf3         | INSIDE                 | 0.660                                                        | 2.628                          | 1387.42            | 3646.05            | 1.733                          | 1171.12            | 2029.91            |
| A_68_P31051124 | chr17:12511856-12511901                           | NM_011948:-352     | Map3k4        | PROMOTER               | 0.660                                                        | 0.508                          | 1315.65            | 668.69             | 0.335                          | 1125.73            | 377.64             |
| A_68_P21744134 | chr2:151319923-151319967                          | NM_198326:-99      | Nsf11c        | PROMOTER               | 0.660                                                        | 0.649                          | 897.33             | 582.70             | 0.428                          | 697.84             | 298.98             |
| A_68_P20618103 | chr1:133763971-133764015                          | NM_144875:139      | Rab711        | INSIDE                 | 0.660                                                        | 0.596                          | 1245.37            | 742.01             | 0.393                          | 1040.68            | 409.25             |
| A_68_P29982091 | chr15:5066504-5066548                             | NM_026069:-86      | Rpl37         | DIVERGENT_PROMOTER     | 0.660                                                        | 0.527                          | 1313.48            | 692.63             | 0.348                          | 1118.21            | 389.18             |
| A_68_P24431878 | chr6:49214131-49214175                            | NM_198102:-101     | Tra2a         | PROMOTER               | 0.660                                                        | 0.547                          | 1378.24            | 753.33             | 0.361                          | 1225.96            | 442.04             |
| A_68_P28743067 | chr12:112513239-112513283                         | NM_033603:3939     | Amn           | INSIDE                 | 0.659                                                        | 0.444                          | 2108.31            | 935.35             | 0.292                          | 1697.05            | 496.39             |
| A_68_P22350123 | chr3:96401551-96401595                            | NM_001024851:1014  | Ankrd34a      | INSIDE                 | 0.659                                                        | 0.357                          | 1442.42            | 514.58             | 0.235                          | 1071.90            | 251.88             |
| A_68_P31751922 | chr18:60686064-60686108                           | NM_026302:212      | Dctn4         | INSIDE                 | 0.659                                                        | 0.611                          | 1171.49            | 715.57             | 0.403                          | 921.77             | 371.06             |
| A_68_P30361874 | chr15:78543529-78543573                           | NM_183141:4993     | Elfn2         | INSIDE                 | 0.659                                                        | 0.436                          | 2396.17            | 1045.86            | 0.287                          | 1940.54            | 557.78             |
| A_68_P28187037 | chr11:120686073-120686117                         | NM_007988:-233     | Fasn          | PROMOTER               | 0.659                                                        | 0.547                          | 2938.89            | 1607.96            | 0.361                          | 2277.31            | 820.98             |
| A_68_P21059044 | chr2:22478107-22478151                            | NM_008078:282      | Gad2          | INSIDE                 | 0.659                                                        | 0.563                          | 2920.10            | 1644.43            | 0.371                          | 2196.90            | 814.91             |
| A_68_P20729266 | chr1:155746790-155746834                          | NM_008131:-262     | Glul          | PROMOTER               | 0.659                                                        | 0.418                          | 1419.85            | 593.41             | 0.276                          | 1090.54            | 300.51             |
| A_68_P32281779 | chrX:17739627-17739671                            | NM_009483:-144     | Kdm6a         | PROMOTER               | 0.659                                                        | 0.414                          | 2101.22            | 869.94             | 0.273                          | 751.51             | 205.12             |
| A_68_P21706642 | chr2:144156624-144156668                          | NM_152947:452      | Ovo12         | INSIDE                 | 0.659                                                        | 0.463                          | 1783.17            | 826.18             | 0.305                          | 1626.83            | 496.36             |
| A_68_P26022868 | chr8:87489665-87489709                            | NM_027187:224      | Rnaseh2a      | INSIDE                 | 0.659                                                        | 0.554                          | 2412.21            | 1337.52            | 0.366                          | 1650.17            | 603.15             |
| A_68_P30370942 | chr15:80064643-80064687                           | NM_178719:155      | Smcr7l        | INSIDE                 | 0.659                                                        | 0.560                          | 1635.09            | 915.58             | 0.369                          | 1271.94            | 469.21             |
| A_68_P31093841 | chr17:23956616-23956662                           | NM_175229:16485    | Srrm2         | INSIDE                 | 0.659                                                        | 2.506                          | 862.34             | 2161.44            | 1.652                          | 613.74             | 1013.66            |
| A_68_P31213960 | chr17:47874243-47874287                           | NM_001161723:-615  | Tefeb         | PROMOTER               | 0.659                                                        | 0.682                          | 2676.72            | 1826.49            | 0.450                          | 2273.36            | 1022.84            |
| A_68_P26867067 | chr9:118468644-118468695                          | NM_0018748:53234   | Golga4        | INSIDE                 | 0.658                                                        | 2.225                          | 881.75             | 1962.18            | 1.465                          | 798.09             | 1169.49            |
| A_68_P26585801 | chr9:64949612-64949656                            | NM_020043:333      | Igdec4        | INSIDE                 | 0.658                                                        | 0.627                          | 1439.01            | 901.83             | 0.412                          | 1230.41            | 507.04             |
| A_68_P20391651 | chr1:82280179-82280223                            | NM_010570:7814     | Irs1          | INSIDE                 | 0.658                                                        | 0.653                          | 5226.48            | 3411.42            | 0.430                          | 3985.50            | 1712.03            |
| A_68_P20714216 | chr1:153191544-153191588                          | NM_001039511:-61   | Ivns1abp      | PROMOTER               | 0.658                                                        | 0.439                          | 1428.02            | 627.33             | 0.289                          | 1103.53            | 318.97             |
| A_68_P22303238 | chr3:86351126-86351170                            | NM_011839:1057     | Mab2112       | INSIDE                 | 0.658                                                        | 0.321                          | 1866.19            | 598.95             | 0.211                          | 1307.52            | 276.08             |
| A_68_P27924625 | chr11:74986839-74986883                           | NR_029794:-29      | Mir212        | DIVERGENT_PROMOTER     | 0.658                                                        | 0.565                          | 2361.24            | 1333.63            | 0.372                          | 2102.63            | 781.59             |
| A_68_P22220260 | chr3:69120137-69120181                            | NM_178726:-681     | Ppm11         | PROMOTER               | 0.658                                                        | 0.580                          | 1565.18            | 907.78             | 0.382                          | 1400.32            | 534.54             |
| A_68_P22345836 | chr3:95623356-95623400                            | NM_001081293:-502  | Rprd2         | PROMOTER               | 0.658                                                        | 0.625                          | 918.79             | 574.31             | 0.411                          | 845.16             | 347.61             |
| A_68_P24152941 | chr5:143177960-143178004                          | NM_146257:-72      | Stc29a4       | PROMOTER               | 0.658                                                        | 2.270                          | 11641.00           | 26427.90           | 1.495                          | 7524.11            | 11247.90           |

| ProbeName      | Target position of probe on CpG island microarray | TargetID           | GeneSymbol    | CpG island Description | Ratio of relative methylation (TiO <sub>2</sub> -NP/Vehicle) | Sham group                     |                    |                    | TiO <sub>2</sub> -H group      |                    |                    |
|----------------|---------------------------------------------------|--------------------|---------------|------------------------|--------------------------------------------------------------|--------------------------------|--------------------|--------------------|--------------------------------|--------------------|--------------------|
|                |                                                   |                    |               |                        |                                                              | Relative methylation (Cy5/Cy3) | Cy3 signal (Input) | Cy5 signal (MeDIP) | Relative methylation (Cy5/Cy3) | Cy3 signal (Input) | Cy5 signal (MeDIP) |
| A_68_P27636581 | chr11:21271108-21271152                           | NM_139297:248      | Ugp2          | PROMOTER               | 0.658                                                        | 0.547                          | 1452.35            | 794.69             | 0.360                          | 1201.24            | 432.29             |
| A_68_P30476370 | chr15:98602905-98602961                           | NM_011718:5649     | Wnt10b        | INSIDE                 | 0.658                                                        | 0.648                          | 983.34             | 637.23             | 0.426                          | 799.76             | 340.80             |
| A_68_P31054976 | chr17:13185515-13185559                           | NM_175394:-131     | Wtap          | PROMOTER               | 0.658                                                        | 0.434                          | 1511.65            | 656.75             | 0.286                          | 1108.73            | 317.01             |
| A_68_P20876215 | chr1:182413252-182413296                          | NM_001081227:361   | 6330403A02Rik | INSIDE                 | 0.657                                                        | 0.646                          | 793.94             | 512.70             | 0.425                          | 663.82             | 281.80             |
| A_68_P24760450 | chr6:113555022-113555066                          | NM_133937:279      | 6720456B07Rik | INSIDE                 | 0.657                                                        | 0.482                          | 3223.92            | 1555.53            | 0.317                          | 2566.48            | 814.00             |
| A_68_P24540591 | chr6:72184914-72184958                            | NM_153778:635      | Atoh8         | INSIDE                 | 0.657                                                        | 0.687                          | 2346.58            | 1611.95            | 0.451                          | 1756.77            | 792.80             |
| A_68_P28181191 | chr11:119803923-119803967                         | NM_001037754:-461  | Baiap2        | PROMOTER               | 0.657                                                        | 0.387                          | 1383.14            | 535.48             | 0.254                          | 1139.96            | 290.04             |
| A_68_P22449313 | chr3:116126350-116126394                          | NM_001080818:578   | Cdc14a        | INSIDE                 | 0.657                                                        | 0.574                          | 1449.04            | 832.43             | 0.377                          | 1155.72            | 436.23             |
| A_68_P26221733 | chr8:123191825-123191869                          | NM_010926:166      | Cox4nb        | INSIDE                 | 0.657                                                        | 0.444                          | 1290.41            | 573.13             | 0.292                          | 1065.41            | 310.74             |
| A_68_P21071852 | chr2:25251736-25251780                            | NM_009849:365      | Entpd2        | INSIDE                 | 0.657                                                        | 0.679                          | 1003.25            | 681.27             | 0.446                          | 736.79             | 328.75             |
| A_68_P23118613 | chr4:94281110-94281154                            | NM_026319:-78      | Ifit74        | PROMOTER               | 0.657                                                        | 0.505                          | 2146.78            | 1083.81            | 0.332                          | 1823.82            | 605.34             |
| A_68_P25005382 | chr7:25316864-25316908                            | NM_153134:1220     | Irgq          | INSIDE                 | 0.657                                                        | 0.592                          | 1466.50            | 868.70             | 0.389                          | 1098.25            | 427.25             |
| A_68_P24536430 | chr6:71391224-71391268                            | NM_024288:-615     | Rmnd5a        | PROMOTER               | 0.657                                                        | 0.712                          | 1828.65            | 1301.86            | 0.468                          | 1256.83            | 587.82             |
| A_68_P23312650 | chr4:132066273-132066317                          | NM_144907:77       | Sesn2         | INSIDE                 | 0.657                                                        | 0.640                          | 1179.23            | 754.89             | 0.420                          | 958.86             | 403.05             |
| A_68_P31841969 | chr18:76401128-76401172                           | NM_010754:-428     | Smad2         | PROMOTER               | 0.657                                                        | 0.581                          | 3962.36            | 2300.73            | 0.382                          | 3061.97            | 1168.17            |
| A_68_P28012997 | chr11:90499182-90499226                           | NM_011505:218      | Stxbp4        | INSIDE                 | 0.657                                                        | 0.648                          | 1058.56            | 686.34             | 0.426                          | 718.26             | 306.10             |
| A_68_P26421202 | chr9:35007602-35007646                            | NM_001177846:-74   | Tirap         | PROMOTER               | 0.657                                                        | 0.573                          | 1140.89            | 653.58             | 0.376                          | 972.80             | 366.21             |
| A_68_P29211817 | chr13:90229380-90229424                           | NM_025335:131      | Tmem167       | INSIDE                 | 0.657                                                        | 0.513                          | 1928.84            | 989.87             | 0.337                          | 1446.10            | 487.23             |
| A_68_P30503432 | chr15:103144711-103144755                         | NM_013866:25785    | Zfp385a       | INSIDE                 | 0.657                                                        | 2.208                          | 1289.63            | 2847.64            | 1.450                          | 944.34             | 1368.97            |
| A_68_P27100908 | chr10:43260523-43260567                           | NM_026411:256      | 1700021F05Rik | INSIDE                 | 0.656                                                        | 0.624                          | 1409.83            | 879.04             | 0.409                          | 1221.30            | 499.63             |
| A_68_P23154900 | chr4:101092304-101092348                          | NM_009647:19       | Ak4           | INSIDE                 | 0.656                                                        | 0.687                          | 1672.17            | 1148.10            | 0.451                          | 1431.01            | 645.01             |
| A_68_P22350132 | chr3:96402437-96402481                            | NM_001024851:1900  | Ankrd34a      | INSIDE                 | 0.656                                                        | 0.660                          | 2265.19            | 1495.18            | 0.433                          | 1805.69            | 781.54             |
| A_68_P25588255 | chr7:148524764-148524808                          | NR_027770:-104     | Deaf1         | DIVERGENT_PROMOTER     | 0.656                                                        | 0.645                          | 1280.83            | 826.61             | 0.423                          | 1036.09            | 438.71             |
| A_68_P29644188 | chr14:60997183-60997227                           | NM_001164705:82    | Fam123a       | INSIDE                 | 0.656                                                        | 0.550                          | 1771.93            | 975.27             | 0.361                          | 1433.61            | 517.39             |
| A_68_P27278459 | chr10:79180444-79180488                           | NM_008226:1088     | Hcn2          | INSIDE                 | 0.656                                                        | 0.655                          | 1170.31            | 766.08             | 0.429                          | 940.59             | 403.81             |
| A_68_P23252660 | chr4:120370742-120370786                          | NM_001081142:49017 | Kenq4         | INSIDE                 | 0.656                                                        | 3.128                          | 4023.88            | 12586.34           | 2.052                          | 2870.52            | 5890.80            |
| A_68_P29856570 | chr14:102129092-102129136                         | NM_201529:-30      | Lmo7          | PROMOTER               | 0.656                                                        | 0.543                          | 1325.98            | 719.70             | 0.356                          | 1049.77            | 373.79             |
| A_68_P29274934 | chr13:102464406-102464450                         | NM_001024955:-1826 | Pik3r1        | PROMOTER               | 0.656                                                        | 0.608                          | 966.97             | 588.13             | 0.399                          | 900.07             | 359.29             |
| A_68_P30010836 | chr15:10415930-10415974                           | NM_011232:164      | Rad1          | INSIDE                 | 0.656                                                        | 0.690                          | 1309.92            | 903.80             | 0.452                          | 1088.47            | 492.49             |
| A_68_P22572455 | chr3:138738714-138738758                          | NM_001040690:-573  | Rap1gds1      | PROMOTER               | 0.656                                                        | 0.377                          | 1539.73            | 581.21             | 0.248                          | 1233.78            | 305.44             |
| A_68_P20793340 | chr1:167124392-167124436                          | NM_145512:150      | Sft2d2        | INSIDE                 | 0.656                                                        | 0.691                          | 1278.22            | 883.79             | 0.453                          | 1099.45            | 498.32             |
| A_68_P31926801 | chr19:5085238-5085283                             | NM_001001885:217   | Tmem151a      | INSIDE                 | 0.656                                                        | 0.555                          | 1342.06            | 744.73             | 0.364                          | 1171.07            | 426.35             |
| A_68_P27804721 | chr11:53244209-53244253                           | NM_025352:103      | Uqerq         | INSIDE                 | 0.656                                                        | 0.376                          | 1433.16            | 539.11             | 0.247                          | 1209.03            | 298.46             |
| A_68_P25505644 | chr7:134592579-134592623                          | NM_175163:70       | Zfp689        | INSIDE                 | 0.656                                                        | 0.528                          | 1421.16            | 749.72             | 0.346                          | 1004.56            | 347.43             |
| A_68_P27269569 | chr10:77127129-77127173                           |                    |               | Unknown                | 0.656                                                        | 2.122                          | 5450.30            | 11563.49           | 1.392                          | 4134.26            | 5753.76            |
| A_68_P20447503 | chr1:94077585-94077629                            | AK155250:-688      |               | PROMOTER               | 0.656                                                        | 0.634                          | 1170.32            | 742.21             | 0.416                          | 986.34             | 410.35             |
| A_68_P22037673 | chr3:32264387-32264431                            | NR_027966:-2       | 4930429B21Rik | PROMOTER               | 0.655                                                        | 0.458                          | 4313.59            | 1976.21            | 0.300                          | 3350.07            | 1005.86            |
| A_68_P28183224 | chr11:120095621-120095666                         | NM_198423:1383     | Bahcc1        | INSIDE                 | 0.655                                                        | 0.647                          | 2464.21            | 1595.23            | 0.424                          | 1712.63            | 726.58             |
| A_68_P30337596 | chr15:74347238-74347282                           | NM_174991:635      | Bai1          | INSIDE                 | 0.655                                                        | 0.607                          | 1736.25            | 1053.94            | 0.398                          | 1380.84            | 549.00             |
| A_68_P30836891 | chr16:67620592-67620636                           | NM_001145977:539   | Cadm2         | INSIDE                 | 0.655                                                        | 0.618                          | 1691.84            | 1046.08            | 0.405                          | 1262.79            | 511.09             |
| A_68_P24125355 | chr5:137799146-137799190                          | NM_001159571:7832  | Ephb4         | INSIDE                 | 0.655                                                        | 2.823                          | 615.22             | 1736.53            | 1.848                          | 566.27             | 1046.42            |
| A_68_P27897908 | chr11:69727660-69727704                           | NM_019726:-11      | Gps2          | PROMOTER               | 0.655                                                        | 0.503                          | 2695.71            | 1356.48            | 0.330                          | 1950.72            | 642.99             |
| A_68_P27897812 | chr11:69715753-69715797                           | NM_001013414:395   | Neur14        | INSIDE                 | 0.655                                                        | 0.546                          | 1649.75            | 900.96             | 0.358                          | 1233.32            | 441.15             |
| A_68_P31935004 | chr19:6481505-6481549                             | NM_001205234:62789 | Nrxn2         | INSIDE                 | 0.655                                                        | 2.154                          | 3802.31            | 8188.49            | 1.411                          | 2531.56            | 3573.21            |
| A_68_P24931167 | chr6:146837167-146837211                          | NM_001170433:173   | Ppfbp1        | INSIDE                 | 0.655                                                        | 0.692                          | 2211.77            | 1530.32            | 0.453                          | 1846.75            | 836.77             |
| A_68_P32150072 | chr19:47538682-47538726                           | NM_001164717:197   | Sh3pxd2a      | INSIDE                 | 0.655                                                        | 0.608                          | 1522.14            | 924.88             | 0.398                          | 1241.86            | 493.98             |
| A_68_P21311407 | chr2:6969641-6969685                              | NM_001110145:44    | Ssb           | INSIDE                 | 0.655                                                        | 0.470                          | 1500.34            | 705.40             | 0.308                          | 1358.31            | 418.06             |
| A_68_P25591626 | chr7:149088429-149088473                          | NM_023764:-139     | Tollip        | PROMOTER               | 0.655                                                        | 0.646                          | 1001.20            | 646.50             | 0.423                          | 830.74             | 351.32             |
| A_68_P27356012 | chr10:93309036-93309080                           | NM_183199:14759    | Usp44         | INSIDE                 | 0.655                                                        | 3.048                          | 1192.22            | 3633.63            | 1.996                          | 1052.88            | 2101.65            |
| A_68_P31204662 | chr17:46168262-46168306                           | NM_001110266:-6172 | Vegfa         | PROMOTER               | 0.655                                                        | 0.559                          | 1009.01            | 563.57             | 0.366                          | 853.50             | 312.15             |
| A_68_P24631969 | chr6:90320325-90320370                            | NM_030260:860      | Zxdc          | INSIDE                 | 0.655                                                        | 0.533                          | 1114.63            | 594.15             | 0.349                          | 916.81             | 320.28             |

| ProbeName      | Target position of probe on CpG island microarray | TargetID            | GeneSymbol    | CpG island Description | Ratio of relative methylation (TiO <sub>2</sub> -NP/Vehicle) | Sham group                     |                    |                    | TiO <sub>2</sub> -H group      |                    |                    |
|----------------|---------------------------------------------------|---------------------|---------------|------------------------|--------------------------------------------------------------|--------------------------------|--------------------|--------------------|--------------------------------|--------------------|--------------------|
|                |                                                   |                     |               |                        |                                                              | Relative methylation (Cy5/Cy3) | Cy3 signal (Input) | Cy5 signal (MeDIP) | Relative methylation (Cy5/Cy3) | Cy3 signal (Input) | Cy5 signal (MeDIP) |
| A_68_P27842897 | chr11:60231302-60231346                           | NM_025757:678       | 4933439F18Rik | INSIDE                 | 0.654                                                        | 0.655                          | 1006.25            | 659.05             | 0.429                          | 775.80             | 332.46             |
| A_68_P31055160 | chr17:13153437-13153481                           | NM_009338:133       | Acat2         | INSIDE                 | 0.654                                                        | 0.483                          | 1171.71            | 566.14             | 0.316                          | 1001.83            | 316.34             |
| A_68_P21492617 | chr2:104966415-104966459                          | NR_015462:231       | Al314831      | INSIDE                 | 0.654                                                        | 0.614                          | 1321.80            | 812.21             | 0.402                          | 1146.31            | 460.51             |
| A_68_P28449511 | chr12:55963765-55963809                           | NM_007688:78        | CfI2          | INSIDE                 | 0.654                                                        | 0.440                          | 1716.52            | 755.81             | 0.288                          | 1482.68            | 426.90             |
| A_68_P25948512 | chr8:72410079-72410123                            | NM_026818:1191      | Cilp2         | INSIDE                 | 0.654                                                        | 0.443                          | 2700.09            | 1196.23            | 0.290                          | 1845.91            | 535.14             |
| A_68_P25776076 | chr8:35869953-35869997                            | NM_176933:-689      | Dusp4         | PROMOTER               | 0.654                                                        | 0.571                          | 2564.91            | 1464.14            | 0.373                          | 1967.69            | 734.05             |
| A_68_P25957388 | chr8:74066580-74066624                            | NM_028617:-226      | Fam125a       | DIVERGENT_PROMOTER     | 0.654                                                        | 0.603                          | 1064.35            | 641.34             | 0.394                          | 853.31             | 336.09             |
| A_68_P31106284 | chr17:25929403-25929447                           | NM_145410:-195      | Fam173a       | PROMOTER               | 0.654                                                        | 0.688                          | 1331.38            | 916.06             | 0.450                          | 1013.23            | 456.00             |
| A_68_P26682080 | chr9:83039935-83039979                            | NM_026122:258       | Hmgn3         | INSIDE                 | 0.654                                                        | 0.656                          | 1783.67            | 1170.60            | 0.429                          | 1385.19            | 594.39             |
| A_68_P27449324 | chr10:110943649-110943693                         | NM_009344:329       | Phlda1        | INSIDE                 | 0.654                                                        | 0.539                          | 1081.33            | 582.49             | 0.352                          | 903.72             | 318.26             |
| A_68_P31411759 | chr17:86020803-86020847                           | NM_011381:651       | Six3          | INSIDE                 | 0.654                                                        | 0.595                          | 2238.44            | 1332.71            | 0.389                          | 1756.08            | 683.90             |
| A_68_P26239786 | chr8:125935222-125935266                          | NM_023279:-219      | Tubb3         | PROMOTER               | 0.654                                                        | 0.589                          | 1583.80            | 932.19             | 0.385                          | 1419.24            | 546.12             |
| A_68_P26232281 | chr8:124805601-124805645                          | NM_009569:-418      | Zfpm1         | PROMOTER               | 0.654                                                        | 3.113                          | 7093.42            | 22079.62           | 2.037                          | 4233.43            | 8622.50            |
| A_68_P26802099 | chr9:106150157-106150201                          | NM_020559:107       | Alas1         | INSIDE                 | 0.653                                                        | 0.720                          | 1662.89            | 1196.94            | 0.470                          | 1261.48            | 593.12             |
| A_68_P32364065 | chrX:45698842-45698886                            | NM_178782:4330      | Bcor1l        | INSIDE                 | 0.653                                                        | 2.914                          | 865.54             | 2521.90            | 1.904                          | 483.93             | 921.37             |
| A_68_P31152205 | chr17:34255338-34255382                           | NR_037970:1485      | Brd2          | INSIDE                 | 0.653                                                        | 0.581                          | 1894.32            | 1101.27            | 0.380                          | 1315.29            | 499.50             |
| A_68_P26519509 | chr9:53056349-53056393                            | NM_029936:-153      | Ddx10         | PROMOTER               | 0.653                                                        | 0.537                          | 1522.99            | 817.41             | 0.351                          | 1233.91            | 432.66             |
| A_68_P31769416 | chr18:63546211-63546255                           | NM_001039485:605    | Fam38b        | INSIDE                 | 0.653                                                        | 0.626                          | 1508.79            | 945.19             | 0.409                          | 1172.54            | 479.91             |
| A_68_P23222252 | chr4:114581006-114581050                          | NM_008593:475       | Foxd2         | INSIDE                 | 0.653                                                        | 0.663                          | 984.16             | 652.19             | 0.433                          | 828.85             | 358.66             |
| A_68_P30500861 | chr15:102773232-102773367                         | NM_010463:6061      | Hoxc12        | DOWNSTREAM             | 0.653                                                        | 0.703                          | 1594.27            | 1121.45            | 0.460                          | 1243.25            | 571.40             |
| A_68_P20229134 | chr1:52874442-52874486                            | NM_008384:68        | Inpp1         | INSIDE                 | 0.653                                                        | 0.730                          | 2012.80            | 1468.90            | 0.476                          | 1592.47            | 758.51             |
| A_68_P26222126 | chr8:123259917-123259961                          | NM_008320:-337      | Irf8          | PROMOTER               | 0.653                                                        | 0.582                          | 1630.42            | 949.18             | 0.380                          | 1302.79            | 495.12             |
| A_68_P30366727 | chr15:79316080-79316124                           | NM_008427:19569     | Kcnj4         | INSIDE                 | 0.653                                                        | 2.056                          | 3781.89            | 7776.96            | 1.343                          | 2686.58            | 3607.71            |
| A_68_P27528049 | chr10:125403615-125403659                         | NM_177152:362       | Lrig3         | INSIDE                 | 0.653                                                        | 0.628                          | 1397.99            | 877.79             | 0.410                          | 1190.24            | 488.34             |
| A_68_P31151557 | chr17:34162040-34162084                           | NR_029800:-25       | Mir219-1      | PROMOTER               | 0.653                                                        | 0.618                          | 3317.33            | 2050.15            | 0.404                          | 2651.31            | 1070.63            |
| A_68_P20018089 | chr1:5906460-5906507                              | NM_010342:996       | Npbwrl1       | INSIDE                 | 0.653                                                        | 2.274                          | 1096.84            | 2494.24            | 1.484                          | 766.36             | 1137.20            |
| A_68_P23354400 | chr4:139377667-139377712                          | NM_011039:11194     | Pax7          | INSIDE                 | 0.653                                                        | 0.693                          | 2436.09            | 1687.37            | 0.452                          | 1808.82            | 817.53             |
| A_68_P31097499 | chr17:24607735-24607779                           | NM_025954:339       | Pgp           | INSIDE                 | 0.653                                                        | 0.483                          | 1351.18            | 652.43             | 0.315                          | 1073.26            | 338.44             |
| A_68_P24059427 | chr5:124573452-124573496                          | NM_011256:92953     | Pitpnm2       | INSIDE                 | 0.653                                                        | 2.145                          | 1806.45            | 3873.94            | 1.401                          | 1175.89            | 1647.64            |
| A_68_P27899473 | chr11:70028070-70028114                           | NM_153081:681       | Slc16a11      | INSIDE                 | 0.653                                                        | 0.449                          | 1495.14            | 671.05             | 0.293                          | 1262.84            | 370.40             |
| A_68_P21116356 | chr2:32462749-32462793                            | NM_001025310:290    | St6galnac6    | INSIDE                 | 0.653                                                        | 0.443                          | 2138.72            | 946.90             | 0.289                          | 1637.68            | 473.42             |
| A_68_P21652098 | chr2:134469794-134469838                          | NM_029148:41        | Tmx4          | INSIDE                 | 0.653                                                        | 0.491                          | 1576.93            | 775.03             | 0.321                          | 1270.80            | 407.65             |
| A_68_P31624558 | chr18:36719345-36719389                           | NM_175375:-890      | Ankhd1        | PROMOTER               | 0.652                                                        | 0.443                          | 1562.32            | 691.96             | 0.289                          | 1311.14            | 378.84             |
| A_68_P27334198 | chr10:89512597-89512641                           | NM_001128086:176365 | Anks1b        | INSIDE                 | 0.652                                                        | 3.116                          | 369.75             | 1152.02            | 2.032                          | 365.58             | 743.02             |
| A_68_P27284501 | chr10:80101148-80101192                           | NM_001159591:8770   | Csnk1g2       | INSIDE                 | 0.652                                                        | 2.188                          | 1736.53            | 3798.94            | 1.427                          | 1321.42            | 1885.63            |
| A_68_P23582162 | chr5:32438904-32438948                            | NM_008037:82        | Fosl2         | INSIDE                 | 0.652                                                        | 0.693                          | 1512.24            | 1047.93            | 0.451                          | 1175.62            | 530.76             |
| A_68_P26224615 | chr8:123641830-123641874                          | NM_013519:1782      | Foxc2         | INSIDE                 | 0.652                                                        | 0.439                          | 1379.86            | 606.37             | 0.286                          | 1020.43            | 292.22             |
| A_68_P24533908 | chr6:70906504-70906548                            | NM_001101464:-73    | Foxi3         | PROMOTER               | 0.652                                                        | 0.571                          | 1723.25            | 984.33             | 0.373                          | 1304.38            | 486.08             |
| A_68_P27536903 | chr10:127031018-127031062                         | NM_008512:27164     | Lrp1          | INSIDE                 | 0.652                                                        | 2.582                          | 1667.49            | 4305.84            | 1.683                          | 1242.84            | 2091.36            |
| A_68_P26204794 | chr8:120325573-120325617                          | NM_026758:235       | Mphosph6      | INSIDE                 | 0.652                                                        | 0.561                          | 1212.15            | 679.99             | 0.366                          | 1011.10            | 369.93             |
| A_68_P30295277 | chr15:66801273-66801317                           | NM_008681:-91       | Ndrp1         | PROMOTER               | 0.652                                                        | 0.392                          | 1920.63            | 753.31             | 0.256                          | 1429.87            | 365.71             |
| A_68_P20370402 | chr1:78193529-78193573                            | NM_001159520:161    | Pax3          | INSIDE                 | 0.652                                                        | 0.595                          | 1505.07            | 895.51             | 0.388                          | 1258.59            | 488.35             |
| A_68_P26573398 | chr9:62828411-62828455                            | NM_019663:254       | Pias1         | INSIDE                 | 0.652                                                        | 0.686                          | 3303.73            | 2264.88            | 0.447                          | 2612.06            | 1167.71            |
| A_68_P29055170 | chr13:55565739-55565783                           | NM_001030296:133    | Prr7          | INSIDE                 | 0.652                                                        | 0.555                          | 1054.47            | 585.21             | 0.362                          | 875.87             | 317.12             |
| A_68_P28137851 | chr11:112646227-112646271                         | NM_011448:2725      | Sox9          | INSIDE                 | 0.652                                                        | 0.476                          | 3114.77            | 1483.97            | 0.310                          | 2500.51            | 776.27             |
| A_68_P29560589 | chr14:41779724-41779768                           | NM_145928:350       | Tspan14       | INSIDE                 | 0.652                                                        | 0.589                          | 1931.70            | 1138.56            | 0.384                          | 1656.26            | 636.34             |
| A_68_P25947839 | chr8:72273658-72273702                            | NM_001200023:181    | Zfp963        | INSIDE                 | 0.652                                                        | 0.357                          | 2152.55            | 767.40             | 0.232                          | 1797.64            | 417.73             |
| A_68_P31961512 | chr19:12670749-12670793                           | NR_015503:286       | A330040F15Rik | INSIDE                 | 0.651                                                        | 0.371                          | 1868.62            | 693.37             | 0.242                          | 1442.61            | 348.69             |
| A_68_P22482404 | chr3:122123031-122123075                          | NM_013867:355       | Bear3         | INSIDE                 | 0.651                                                        | 0.688                          | 1892.26            | 1301.59            | 0.448                          | 1459.46            | 653.58             |
| A_68_P22413865 | chr3:108456942-108456986                          | NM_001177770:57     | Clec1         | INSIDE                 | 0.651                                                        | 0.330                          | 1817.88            | 600.02             | 0.215                          | 1674.97            | 360.17             |
| A_68_P32094200 | chr19:37249204-37249248                           | NM_198300:32557     | Cpeb3         | INSIDE                 | 0.651                                                        | 0.667                          | 3503.09            | 2337.36            | 0.434                          | 2782.03            | 1207.72            |

| ProbeName      | Target position of probe on CpG island microarray | TargetID           | GeneSymbol    | CpG island Description | Ratio of relative methylation (TiO <sub>2</sub> -NP/Vehicle) | Sham group                     |                    |                    | TiO <sub>2</sub> -H group      |                    |                    |
|----------------|---------------------------------------------------|--------------------|---------------|------------------------|--------------------------------------------------------------|--------------------------------|--------------------|--------------------|--------------------------------|--------------------|--------------------|
|                |                                                   |                    |               |                        |                                                              | Relative methylation (Cy5/Cy3) | Cy3 signal (Input) | Cy5 signal (MeDIP) | Relative methylation (Cy5/Cy3) | Cy3 signal (Input) | Cy5 signal (MeDIP) |
| A_68_P20137270 | chr1:34234710-34234761                            | NM_133833:166066   | Dst           | INSIDE                 | 0.651                                                        | 3.787                          | 212.75             | 805.64             | 2.467                          | 206.01             | 508.22             |
| A_68_P24449858 | chr6:52263643-52263687                            | NM_007966:173      | Evx1          | INSIDE                 | 0.651                                                        | 0.440                          | 1586.70            | 698.08             | 0.286                          | 1311.23            | 375.36             |
| A_68_P30093915 | chr15:27610984-27611028                           | NM_198301:247      | Fam105a       | INSIDE                 | 0.651                                                        | 0.684                          | 2057.35            | 1406.39            | 0.445                          | 1708.53            | 760.09             |
| A_68_P23274595 | chr4:125168487-125168531                          | NM_001081097:434   | Grik3         | INSIDE                 | 0.651                                                        | 0.648                          | 1355.65            | 879.12             | 0.422                          | 1100.74            | 464.36             |
| A_68_P26215168 | chr8:122157059-122157103                          | NM_025734:2500     | Keng4         | INSIDE                 | 0.651                                                        | 2.357                          | 818.18             | 1928.32            | 1.534                          | 766.81             | 1176.59            |
| A_68_P31406961 | chr17:85189534-85189578                           | NM_028233:570      | Lrpprc        | INSIDE                 | 0.651                                                        | 0.624                          | 1016.38            | 634.34             | 0.407                          | 766.49             | 311.60             |
| A_68_P25025263 | chr7:29870710-29870754                            | NR_035489:-2019    | Mir1963       | PROMOTER               | 0.651                                                        | 2.608                          | 4466.52            | 11647.53           | 1.698                          | 2906.53            | 4936.17            |
| A_68_P23615664 | chr5:38208449-38208493                            | NM_010835:7354     | Msx1          | DOWNSTREAM             | 0.651                                                        | 2.478                          | 2092.20            | 5184.99            | 1.614                          | 1476.33            | 2383.32            |
| A_68_P31112724 | chr17:26978218-26978262                           | NM_008700:270      | Nkx2-5        | INSIDE                 | 0.651                                                        | 0.639                          | 2373.49            | 1517.28            | 0.416                          | 2003.61            | 833.68             |
| A_68_P32107646 | chr19:40345679-40345723                           | NM_016861:406      | Pdlim1        | INSIDE                 | 0.651                                                        | 0.346                          | 2015.46            | 697.52             | 0.225                          | 1704.07            | 384.19             |
| A_68_P21006492 | chr2:11424861-11424905                            | NM_001177752:-1165 | Ptkfb3        | PROMOTER               | 0.651                                                        | 0.537                          | 1161.10            | 623.36             | 0.349                          | 958.88             | 335.11             |
| A_68_P23531277 | chr5:21851025-21851070                            | NM_011261:-524     | Reln          | PROMOTER               | 0.651                                                        | 0.661                          | 1497.21            | 990.22             | 0.430                          | 1294.20            | 556.98             |
| A_68_P31936299 | chr19:6904994-6905038                             | NM_019924:10075    | Rps6ka4       | INSIDE                 | 0.651                                                        | 0.447                          | 1447.70            | 646.70             | 0.291                          | 1061.00            | 308.55             |
| A_68_P23165023 | chr4:102888044-102888088                          | NM_177732:-577     | Slc35d1       | PROMOTER               | 0.651                                                        | 0.694                          | 1415.28            | 982.17             | 0.452                          | 1125.28            | 508.43             |
| A_68_P22863908 | chr4:41660593-41660637                            | NM_027278:-65      | 2810432D09Rik | PROMOTER               | 0.650                                                        | 0.535                          | 1473.68            | 788.48             | 0.348                          | 1281.32            | 445.32             |
| A_68_P22479596 | chr3:121656435-121656479                          | NM_172525:213      | Arhgap29      | INSIDE                 | 0.650                                                        | 0.600                          | 1067.93            | 640.26             | 0.390                          | 917.44             | 357.48             |
| A_68_P24980778 | chr7:16897508-16897552                            | NM_133234:2599     | Bbc3          | INSIDE                 | 0.650                                                        | 0.515                          | 1396.88            | 719.35             | 0.335                          | 1236.23            | 413.85             |
| A_68_P24008375 | chr5:115644484-115644528                          | NM_013879:-8376    | Cabp1         | PROMOTER               | 0.650                                                        | 0.403                          | 1287.34            | 519.41             | 0.262                          | 1078.13            | 282.69             |
| A_68_P31186622 | chr17:43013421-43013465                           | NM_009847:-69      | Cd2ap         | PROMOTER               | 0.650                                                        | 0.721                          | 1637.03            | 1179.64            | 0.468                          | 1520.31            | 712.00             |
| A_68_P30026215 | chr15:13103074-13103118                           | NM_007666:298      | Cdh6          | INSIDE                 | 0.650                                                        | 0.710                          | 5232.29            | 3715.88            | 0.356                          | 3839.97            | 1773.12            |
| A_68_P29196857 | chr13:86186094-86186138                           | NM_007749:284      | Cox7c         | INSIDE                 | 0.650                                                        | 0.505                          | 1146.09            | 579.31             | 0.328                          | 1081.14            | 355.01             |
| A_68_P32093242 | chr19:37093220-37093264                           | NM_198300:188541   | Cpeb3         | DOWNSTREAM             | 0.650                                                        | 0.735                          | 2543.40            | 1870.48            | 0.478                          | 2135.53            | 1020.16            |
| A_68_P24817420 | chr6:124811153-124811197                          | NM_013533:2761     | Gpr162        | INSIDE                 | 0.650                                                        | 2.824                          | 1192.47            | 3368.01            | 1.834                          | 939.70             | 1723.85            |
| A_68_P20240344 | chr1:55145241-55145285                            | NM_008303:271      | Hspe1         | INSIDE                 | 0.650                                                        | 0.475                          | 1246.14            | 592.43             | 0.309                          | 1020.33            | 315.22             |
| A_68_P21613745 | chr2:127307805-127307849                          | NM_001111331:409   | Kenip3        | INSIDE                 | 0.650                                                        | 0.441                          | 2650.19            | 1168.26            | 0.287                          | 2148.46            | 615.97             |
| A_68_P26588950 | chr9:65524268-65524312                            | NM_010952:-64      | Oaz2-ps       | PROMOTER               | 0.650                                                        | 0.614                          | 1028.55            | 631.76             | 0.399                          | 831.67             | 331.97             |
| A_68_P25957674 | chr8:74115987-74116031                            | NM_025396:-74      | Pgls          | PROMOTER               | 0.650                                                        | 0.586                          | 1398.98            | 819.98             | 0.381                          | 1063.00            | 404.72             |
| A_68_P24176178 | chr5:148674084-148674130                          | NM_025624:1903     | Pomp          | PROMOTER               | 0.650                                                        | 2.514                          | 645.38             | 1622.69            | 1.635                          | 512.61             | 838.38             |
| A_68_P31868104 | chr18:81182542-81182586                           | NM_178280:753      | Sall3         | INSIDE                 | 0.650                                                        | 0.534                          | 1422.10            | 759.78             | 0.348                          | 1067.28            | 370.91             |
| A_68_P28540844 | chr12:75065711-75065755                           | NM_178392:216      | Snapc1        | INSIDE                 | 0.650                                                        | 0.627                          | 1423.89            | 893.06             | 0.408                          | 1175.17            | 479.01             |
| A_68_P28307234 | chr12:28023843-28023887                           | NM_009234:3719     | Sox11         | INSIDE                 | 0.650                                                        | 0.673                          | 1241.04            | 834.66             | 0.437                          | 1084.51            | 474.32             |
| A_68_P29672990 | chr14:65977418-65977462                           | NM_199029:-72      | Zfp395        | PROMOTER               | 0.650                                                        | 0.548                          | 1234.36            | 676.50             | 0.356                          | 1021.31            | 363.56             |
| A_68_P30394507 | chr15:84237076-84237131                           | NM_001163145:40424 | 1810041L15Rik | INSIDE                 | 0.649                                                        | 5.609                          | 2320.61            | 13015.88           | 3.642                          | 1346.29            | 4902.97            |
| A_68_P27904028 | chr11:70846735-70846779                           | NM_134022:363      | 6330403K07Rik | INSIDE                 | 0.649                                                        | 0.578                          | 1180.96            | 682.81             | 0.376                          | 949.72             | 356.62             |
| A_68_P26134606 | chr8:108089561-108089605                          | NM_013477:358      | Atp6v0d1      | INSIDE                 | 0.649                                                        | 0.568                          | 2506.60            | 1424.01            | 0.369                          | 1834.28            | 676.18             |
| A_68_P28936242 | chr13:34129507-34129551                           | NM_026512:19       | Bphl          | INSIDE                 | 0.649                                                        | 0.542                          | 1096.78            | 594.95             | 0.352                          | 982.49             | 345.68             |
| A_68_P22550733 | chr3:134875756-134875800                          | NM_173762:252      | Cenpe         | INSIDE                 | 0.649                                                        | 0.648                          | 991.59             | 642.34             | 0.420                          | 773.26             | 324.99             |
| A_68_P23807227 | chr5:75471945-75471989                            | NM_133256:341      | Gsx2          | INSIDE                 | 0.649                                                        | 0.448                          | 1377.26            | 616.42             | 0.291                          | 1001.14            | 290.99             |
| A_68_P22793478 | chr4:26273773-26273817                            | NM_172865:5        | Manea         | INSIDE                 | 0.649                                                        | 0.589                          | 2829.43            | 1667.16            | 0.383                          | 2197.29            | 840.60             |
| A_68_P31107419 | chr17:26088437-26088481                           | NM_001039038:-6582 | Nhlrc4        | PROMOTER               | 0.649                                                        | 0.705                          | 1543.19            | 1087.78            | 0.458                          | 1224.04            | 560.00             |
| A_68_P31633050 | chr18:38428628-38428672                           | NM_017378:15405    | Pcdh12        | INSIDE                 | 0.649                                                        | 2.673                          | 409.14             | 1093.71            | 1.736                          | 411.17             | 713.73             |
| A_68_P22356948 | chr3:97692392-97692436                            | NM_001039376:216   | Pde4dip       | INSIDE                 | 0.649                                                        | 0.684                          | 2626.34            | 1796.39            | 0.444                          | 2051.58            | 910.16             |
| A_68_P31139420 | chr17:31523449-31523493                           | NM_001163748:292   | Pde9a         | INSIDE                 | 0.649                                                        | 0.538                          | 1767.14            | 951.56             | 0.349                          | 1459.95            | 509.92             |
| A_68_P20138941 | chr1:34516537-34516581                            | NM_011206:-32      | Ptpn18        | PROMOTER               | 0.649                                                        | 0.553                          | 1213.68            | 671.17             | 0.359                          | 976.21             | 350.26             |
| A_68_P31846732 | chr18:77493370-77493414                           | NM_013666:68807    | St8sia5       | INSIDE                 | 0.649                                                        | 2.348                          | 2710.63            | 6364.55            | 1.524                          | 1865.98            | 2843.82            |
| A_68_P27281037 | chr10:79578104-79578148                           | NM_011492:-1154    | Stk11         | PROMOTER               | 0.649                                                        | 0.530                          | 1828.89            | 969.27             | 0.344                          | 1251.59            | 430.62             |
| A_68_P24760947 | chr6:113647724-113647768                          | NM_001033463:254   | Tatdn2        | INSIDE                 | 0.649                                                        | 0.524                          | 1236.48            | 648.06             | 0.340                          | 1076.77            | 366.41             |
| A_68_P31487558 | chr18:9957999-9958043                             | NM_153552:-157     | Thoc1         | PROMOTER               | 0.649                                                        | 0.503                          | 1773.60            | 891.31             | 0.326                          | 1342.73            | 437.60             |
| A_68_P24007966 | chr5:115577255-115577310                          | NM_175352:7702     | Unc119b       | INSIDE                 | 0.649                                                        | 5.250                          | 1870.32            | 9818.65            | 3.406                          | 1256.12            | 4278.53            |
| A_68_P24059260 | chr5:124540242-124540286                          | NM_019875:5543     | Abcb9         | INSIDE                 | 0.648                                                        | 2.562                          | 3085.29            | 7904.10            | 1.661                          | 2247.29            | 3731.71            |
| A_68_P20437266 | chr1:92500005-92500049                            | NM_133805:27       | Cops8         | INSIDE                 | 0.648                                                        | 0.582                          | 1136.15            | 661.69             | 0.378                          | 937.25             | 353.96             |

| ProbeName      | Target position of probe on CpG island microarray | TargetID          | GeneSymbol   | CpG island Description | Ratio of relative methylation (TiO <sub>2</sub> -NP/Vehicle) | Sham group                     |                    |                    | TiO <sub>2</sub> -H group      |                    |                    |
|----------------|---------------------------------------------------|-------------------|--------------|------------------------|--------------------------------------------------------------|--------------------------------|--------------------|--------------------|--------------------------------|--------------------|--------------------|
|                |                                                   |                   |              |                        |                                                              | Relative methylation (Cy5/Cy3) | Cy3 signal (Input) | Cy5 signal (MeDIP) | Relative methylation (Cy5/Cy3) | Cy3 signal (Input) | Cy5 signal (MeDIP) |
| A_68_P27898577 | chr11:69834947-69834991                           | NM_001109752:2862 | Dlg4         | INSIDE                 | 0.648                                                        | 0.513                          | 1313.67            | 674.23             | 0.333                          | 1020.02            | 339.38             |
| A_68_P30512413 | chr16:4879317-4879361                             | NM_145359:513     | Fam100a      | INSIDE                 | 0.648                                                        | 0.533                          | 1151.90            | 614.17             | 0.346                          | 819.29             | 283.16             |
| A_68_P28432638 | chr12:53072168-53072212                           | NM_177171:118     | Heatr5a      | INSIDE                 | 0.648                                                        | 0.462                          | 1801.20            | 832.51             | 0.300                          | 1625.66            | 487.10             |
| A_68_P26824826 | chr9:110532797-110532841                          | NM_183276:23847   | Nbeal2       | INSIDE                 | 0.648                                                        | 2.812                          | 2334.25            | 6563.42            | 1.822                          | 1637.31            | 2983.00            |
| A_68_P27095770 | chr10:42311388-42311432                           | NM_152229:8016    | Nr2e1        | PROMOTER               | 0.648                                                        | 0.515                          | 1520.31            | 782.29             | 0.333                          | 1203.04            | 401.11             |
| A_68_P29009464 | chr13:46822934-46822978                           | NM_175749:262     | Nup153       | INSIDE                 | 0.648                                                        | 0.433                          | 1908.64            | 826.99             | 0.281                          | 1480.98            | 416.03             |
| A_68_P26528578 | chr9:54798480-54798524                            | NM_011966:-163    | Psmal4       | PROMOTER               | 0.648                                                        | 0.718                          | 1755.06            | 1259.28            | 0.465                          | 1265.83            | 588.51             |
| A_68_P25510686 | chr7:135561251-135561295                          | NM_026418:414     | Rgs10        | INSIDE                 | 0.648                                                        | 0.707                          | 1356.19            | 958.84             | 0.458                          | 1082.84            | 496.08             |
| A_68_P30725222 | chr16:45158683-45158727                           | NM_028756:82      | Slc35a5      | INSIDE                 | 0.648                                                        | 0.611                          | 843.81             | 515.92             | 0.396                          | 757.76             | 300.05             |
| A_68_P20551183 | chr1:120207585-120207629                          | NM_011650:103     | Tsn          | INSIDE                 | 0.648                                                        | 0.539                          | 1932.44            | 1042.17            | 0.349                          | 1603.20            | 560.27             |
| A_68_P25877023 | chr8:55163035-55163079                            | NM_009506:171     | Vegfc        | INSIDE                 | 0.648                                                        | 0.603                          | 2737.76            | 1650.89            | 0.391                          | 2305.21            | 901.17             |
| A_68_P30141374 | chr15:36868599-36868643                           |                   |              | Unknown                | 0.648                                                        | 0.365                          | 3879.51            | 1416.42            | 0.236                          | 3206.83            | 758.20             |
| A_68_P20141344 | chr1:34986763-34986807                            |                   |              | Unknown                | 0.648                                                        | 2.861                          | 587.06             | 1679.65            | 1.855                          | 567.90             | 1053.67            |
| A_68_P28189253 | chr11:121066168-121066212                         | NM_025402:-228    | 111003102Rik | DIVERGENT_PROMOTER     | 0.647                                                        | 0.674                          | 2836.41            | 1911.52            | 0.436                          | 2309.43            | 1007.33            |
| A_68_P21013689 | chr2:12931615-12931659                            | NM_153155:855     | C1ql3        | INSIDE                 | 0.647                                                        | 0.672                          | 974.19             | 655.09             | 0.435                          | 849.89             | 369.68             |
| A_68_P25325434 | chr7:99709780-99709824                            | NM_001162918:144  | Ccdc90b      | INSIDE                 | 0.647                                                        | 0.703                          | 1190.19            | 836.67             | 0.454                          | 937.76             | 426.20             |
| A_68_P29083946 | chr13:60278080-60278124                           | NM_008086:794     | Gas1         | INSIDE                 | 0.647                                                        | 2.797                          | 346.02             | 967.97             | 1.810                          | 347.89             | 629.57             |
| A_68_P25458544 | chr7:125634804-125634848                          | NM_001033380:663  | Itpril2      | INSIDE                 | 0.647                                                        | 0.423                          | 1217.89            | 514.67             | 0.273                          | 962.69             | 263.22             |
| A_68_P24126543 | chr5:138042018-138042062                          | NM_030037:228     | Mospd3       | INSIDE                 | 0.647                                                        | 0.583                          | 1499.36            | 874.05             | 0.377                          | 1140.88            | 430.06             |
| A_68_P20956471 | chr1:196446176-196446220                          | NM_008882:176     | Plkna2       | INSIDE                 | 0.647                                                        | 0.518                          | 2147.75            | 1112.04            | 0.335                          | 1680.28            | 562.98             |
| A_68_P25092648 | chr7:52616935-52616979                            | NM_029741:5433    | Ppfi3        | INSIDE                 | 0.647                                                        | 0.546                          | 1744.66            | 952.09             | 0.353                          | 1343.74            | 474.37             |
| A_68_P25007068 | chr7:25669351-25669396                            | NM_023133:-359    | Rps19        | PROMOTER               | 0.647                                                        | 0.695                          | 2395.65            | 1665.50            | 0.450                          | 1762.43            | 793.30             |
| A_68_P26894025 | chr9:123168633-123168677                          | NM_001002267:1253 | Tmem158      | INSIDE                 | 0.647                                                        | 0.704                          | 1365.83            | 961.32             | 0.455                          | 1099.05            | 500.15             |
| A_68_P22362400 | chr3:98945013-98945057                            | NM_027462:22      | Wars2        | INSIDE                 | 0.647                                                        | 0.586                          | 1480.70            | 867.95             | 0.379                          | 1232.09            | 467.18             |
| A_68_P23591878 | chr5:34279071-34279115                            | NM_011914:-185    | Whsc2        | PROMOTER               | 0.647                                                        | 0.718                          | 1656.32            | 1189.28            | 0.465                          | 1213.21            | 563.55             |
| A_68_P31509663 | chr18:14128717-14128761                           | NM_145492:2504    | Zfp521       | INSIDE                 | 0.647                                                        | 0.709                          | 1369.05            | 970.87             | 0.459                          | 1248.48            | 573.06             |
| A_68_P31620891 | chr18:36080181-36080225                           | AK021191:7417     |              | DOWNSTREAM             | 0.647                                                        | 0.505                          | 1741.27            | 879.53             | 0.327                          | 1247.52            | 407.89             |
| A_68_P24735710 | chr6:108733170-108733214                          | NM_026011:140     | Arl8b        | INSIDE                 | 0.646                                                        | 0.535                          | 1523.38            | 815.54             | 0.346                          | 1278.76            | 442.11             |
| A_68_P23396583 | chr4:148179764-148179808                          | NM_027195:1286    | Cas2         | INSIDE                 | 0.646                                                        | 0.546                          | 2151.18            | 1175.23            | 0.353                          | 1743.54            | 615.11             |
| A_68_P20613762 | chr1:133026314-133026358                          | NM_145508:8475    | Dyrk3        | INSIDE                 | 0.646                                                        | 2.760                          | 1035.86            | 2858.97            | 1.782                          | 860.35             | 1532.86            |
| A_68_P29512329 | chr14:32308482-32308526                           | NM_028932:240     | Eaf1         | INSIDE                 | 0.646                                                        | 0.459                          | 1287.20            | 590.78             | 0.296                          | 1039.79            | 308.20             |
| A_68_P26761439 | chr9:98857310-98857354                            | NM_012020:1307    | Foxl2        | INSIDE                 | 0.646                                                        | 0.380                          | 2619.83            | 996.83             | 0.246                          | 2193.86            | 538.88             |
| A_68_P28206069 | chr12:5381867-5381911                             | NM_001164493:600  | Klhl29       | INSIDE                 | 0.646                                                        | 0.571                          | 1469.22            | 839.34             | 0.369                          | 1153.24            | 425.71             |
| A_68_P27845569 | chr11:60745467-60745511                           | NM_008928:-70     | Map2k3       | DIVERGENT_PROMOTER     | 0.646                                                        | 0.328                          | 1578.99            | 517.62             | 0.212                          | 1136.75            | 240.67             |
| A_68_P25475988 | chr7:129008709-129008753                          | NM_011325:106     | Senn1b       | INSIDE                 | 0.646                                                        | 0.428                          | 1252.92            | 536.83             | 0.277                          | 933.48             | 258.50             |
| A_68_P23311790 | chr4:131885707-131885751                          | NM_027925:-275    | Trmau1ap     | PROMOTER               | 0.646                                                        | 0.615                          | 1618.76            | 995.18             | 0.397                          | 1438.11            | 570.86             |
| A_68_P27790811 | chr11:50641126-50641170                           | NM_013922:85      | Zfp354c      | INSIDE                 | 0.646                                                        | 0.575                          | 2899.51            | 1666.58            | 0.372                          | 2099.59            | 780.08             |
| A_68_P23588918 | chr5:33785513-33785557                            |                   |              | Unknown                | 0.646                                                        | 8.238                          | 2820.06            | 23230.67           | 5.318                          | 1850.53            | 9840.73            |
| A_68_P25024594 | chr7:29747163-29747207                            | NM_021895:115     | Actn4        | INSIDE                 | 0.645                                                        | 0.570                          | 1895.95            | 1081.05            | 0.368                          | 1565.62            | 575.77             |
| A_68_P29514241 | chr4:32644334-32644378                            | NM_001024604:-755 | Ankrd28      | PROMOTER               | 0.645                                                        | 0.404                          | 1801.85            | 728.03             | 0.260                          | 1310.82            | 341.36             |
| A_68_P30896823 | chr16:78577179-78577223                           | NM_025967:-287    | D16Ert472c   | PROMOTER               | 0.645                                                        | 0.681                          | 1168.17            | 795.47             | 0.439                          | 1059.91            | 465.78             |
| A_68_P29335930 | chr13:113442131-113442175                         | NM_001145885:366  | Ddx4         | INSIDE                 | 0.645                                                        | 2.608                          | 2026.92            | 5286.71            | 1.681                          | 1708.42            | 2872.61            |
| A_68_P23595699 | chr5:35003466-35003510                            | NM_001080743:461  | Grk4         | INSIDE                 | 0.645                                                        | 0.613                          | 1008.96            | 618.42             | 0.395                          | 790.34             | 312.33             |
| A_68_P20877853 | chr1:182724319-182724363                          | NM_008210:19394   | H3f3a        | DOWNSTREAM             | 0.645                                                        | 0.523                          | 1074.31            | 561.60             | 0.337                          | 838.95             | 282.98             |
| A_68_P26567942 | chr9:61794410-61794454                            | NM_024245:174     | Kif23        | INSIDE                 | 0.645                                                        | 0.691                          | 1252.07            | 865.46             | 0.446                          | 1080.95            | 482.19             |
| A_68_P21095672 | chr2:29050439-29050483                            | NM_133500:53100   | Ntng2        | INSIDE                 | 0.645                                                        | 0.730                          | 2161.13            | 1577.79            | 0.471                          | 1866.60            | 878.51             |
| A_68_P21322074 | chr2:71711897-71711941                            | NM_172665:590     | Pdk1         | INSIDE                 | 0.645                                                        | 0.552                          | 1129.30            | 623.13             | 0.356                          | 993.73             | 353.69             |
| A_68_P27287756 | chr10:80616365-80616414                           | NM_021501:14076   | Pias4        | DOWNSTREAM             | 0.645                                                        | 3.573                          | 1617.64            | 5780.39            | 2.304                          | 1166.31            | 2686.76            |
| A_68_P21750261 | chr2:152453185-152453229                          | NM_009047:463     | Rem1         | INSIDE                 | 0.645                                                        | 0.444                          | 1860.67            | 826.16             | 0.287                          | 1469.94            | 421.20             |
| A_68_P31067730 | chr17:15962490-15962534                           | NM_178615:1038    | Rgmb         | INSIDE                 | 0.645                                                        | 0.417                          | 2151.37            | 897.58             | 0.269                          | 1632.10            | 439.16             |
| A_68_P28556624 | chr12:77810657-77810701                           | NM_013675:856     | Spnb1        | INSIDE                 | 0.645                                                        | 0.303                          | 2647.47            | 801.05             | 0.195                          | 2209.99            | 431.34             |

| ProbeName      | Target position of probe on CpG island microarray | TargetID           | GeneSymbol    | CpG island Description | Ratio of relative methylation (TiO <sub>2</sub> -NP/Vehicle) | Sham group                     |                    |                    | TiO <sub>2</sub> -H group      |                    |                    |
|----------------|---------------------------------------------------|--------------------|---------------|------------------------|--------------------------------------------------------------|--------------------------------|--------------------|--------------------|--------------------------------|--------------------|--------------------|
|                |                                                   |                    |               |                        |                                                              | Relative methylation (Cy5/Cy3) | Cy3 signal (Input) | Cy5 signal (MeDIP) | Relative methylation (Cy5/Cy3) | Cy3 signal (Input) | Cy5 signal (MeDIP) |
| A_68_P32791361 | chrX:159326363-159326407                          | NM_025932:10       | Syap1         | INSIDE                 | 0.645                                                        | 5.291                          | 1302.62            | 6892.50            | 3.411                          | 603.29             | 2058.07            |
| A_68_P22485526 | chr3:122687380-122687424                          | NM_133857:-37      | Usp53         | PROMOTER               | 0.645                                                        | 0.448                          | 3046.44            | 1364.61            | 0.289                          | 2356.61            | 680.60             |
| A_68_P27292201 | chr10:81817091-81817135                           | DQ459435:113       |               | INSIDE                 | 0.645                                                        | 0.430                          | 2416.43            | 1039.41            | 0.277                          | 1901.22            | 527.09             |
| A_68_P32143656 | chr19:46470216-46470260                           | NM_016860:-13      | Actr1a        | DIVERGENT_PROMOTER     | 0.644                                                        | 0.418                          | 2256.12            | 942.36             | 0.269                          | 1745.71            | 469.68             |
| A_68_P28047528 | chr11:96777981-96778025                           | NM_030248:-207     | Cdk5rap3      | PROMOTER               | 0.644                                                        | 0.630                          | 1635.48            | 1030.65            | 0.406                          | 1163.80            | 471.95             |
| A_68_P29651206 | chr14:62266896-62266940                           | NR_028264:34292    | Dleu2         | INSIDE                 | 0.644                                                        | 0.700                          | 1475.22            | 1033.22            | 0.451                          | 1259.92            | 568.46             |
| A_68_P23969234 | chr5:108298178-108298222                          | NM_007964:5926     | Evi5          | INSIDE                 | 0.644                                                        | 0.636                          | 1399.66            | 890.76             | 0.410                          | 1169.91            | 479.42             |
| A_68_P27865440 | chr11:64249134-64249178                           | NM_178870:323      | Hs3st3a1      | INSIDE                 | 0.644                                                        | 0.627                          | 2304.24            | 1444.40            | 0.404                          | 1736.33            | 700.61             |
| A_68_P28185372 | chr11:120433823-120433867                         | NM_011032:406      | P4hb          | INSIDE                 | 0.644                                                        | 0.651                          | 1657.79            | 1079.68            | 0.420                          | 1330.17            | 558.10             |
| A_68_P22301214 | chr3:85946197-85946241                            | NR_004418:-1609    | Rnu73b        | PROMOTER               | 0.644                                                        | 0.562                          | 960.79             | 540.23             | 0.362                          | 815.47             | 295.20             |
| A_68_P30255521 | chr15:59480987-59481031                           | NM_144549:800      | Trib1         | INSIDE                 | 0.644                                                        | 0.711                          | 2941.36            | 2089.94            | 0.458                          | 2130.32            | 975.09             |
| A_68_P21434081 | chr2:93174589-93174633                            | NM_183180:34       | Tspan18       | INSIDE                 | 0.644                                                        | 0.636                          | 822.85             | 523.40             | 0.409                          | 729.18             | 298.47             |
| A_68_P26184809 | chr8:117045830-117045874                          | NM_019573:82301    | Wwox          | INSIDE                 | 0.644                                                        | 2.694                          | 1201.00            | 3235.35            | 1.734                          | 870.81             | 1509.62            |
| A_68_P26184811 | chr8:117045980-117046026                          | NM_019573:82451    | Wwox          | INSIDE                 | 0.644                                                        | 2.941                          | 853.03             | 2508.99            | 1.895                          | 616.44             | 1168.19            |
| A_68_P30344504 | chr15:75672213-75672257                           | NM_172121:104      | Zc3h3         | INSIDE                 | 0.644                                                        | 0.488                          | 1641.17            | 800.63             | 0.314                          | 1138.16            | 357.45             |
| A_68_P25081793 | chr7:50568397-50568441                            | NM_027264:213      | Zfp715        | INSIDE                 | 0.644                                                        | 0.507                          | 5156.42            | 2612.85            | 0.326                          | 4186.34            | 1366.36            |
| A_68_P20637766 | chr1:137043169-137043217                          | NM_026823:-218     | Arl8a         | PROMOTER               | 0.643                                                        | 0.668                          | 1332.89            | 889.74             | 0.429                          | 1043.44            | 447.63             |
| A_68_P27171640 | chr10:59414686-59414730                           | NM_029083:-190     | Ddit4         | PROMOTER               | 0.643                                                        | 0.621                          | 1703.05            | 1058.42            | 0.400                          | 1477.74            | 590.80             |
| A_68_P20567558 | chr1:123464212-123464256                          | NM_025860:323      | Ddx18         | INSIDE                 | 0.643                                                        | 0.666                          | 1561.56            | 1039.62            | 0.428                          | 1340.21            | 573.95             |
| A_68_P24620313 | chr6:88143671-88143715                            | NM_008090:-4965    | Gata2         | PROMOTER               | 0.643                                                        | 0.694                          | 1209.74            | 839.92             | 0.446                          | 872.92             | 389.45             |
| A_68_P22649021 | chr3:151828589-151828633                          | NM_016867:254      | Gipc2         | INSIDE                 | 0.643                                                        | 0.612                          | 1020.89            | 625.26             | 0.394                          | 880.87             | 347.06             |
| A_68_P24538442 | chr6:71781548-71781592                            | NM_029673:246      | Immt          | INSIDE                 | 0.643                                                        | 0.674                          | 1186.21            | 799.41             | 0.433                          | 1013.46            | 439.12             |
| A_68_P23120704 | chr4:94717633-94717677                            | NM_010591:1259     | Jun           | INSIDE                 | 0.643                                                        | 0.606                          | 1291.57            | 782.50             | 0.389                          | 973.89             | 379.20             |
| A_68_P29701297 | chr14:70843346-70843390                           | NR_029802:52       | Mir320        | INSIDE                 | 0.643                                                        | 0.627                          | 994.33             | 623.54             | 0.403                          | 780.89             | 314.73             |
| A_68_P29507574 | chr14:31528289-31528333                           | NM_001166531:-42   | Sfmbt1        | PROMOTER               | 0.643                                                        | 0.676                          | 961.67             | 650.19             | 0.435                          | 775.40             | 337.34             |
| A_68_P27688273 | chr11:32248073-32248117                           | NM_177364:284      | Sh3pxd2b      | INSIDE                 | 0.643                                                        | 0.738                          | 4627.14            | 3415.56            | 0.475                          | 3784.82            | 1797.77            |
| A_68_P30464706 | chr15:96472084-96472128                           | NM_134086:287      | Sle38a1       | INSIDE                 | 0.643                                                        | 0.621                          | 1270.19            | 788.24             | 0.399                          | 996.93             | 397.86             |
| A_68_P27327920 | chr10:88349166-88349210                           | NM_145423:452      | Sle5a8        | INSIDE                 | 0.643                                                        | 0.410                          | 1537.83            | 630.03             | 0.263                          | 1071.91            | 282.16             |
| A_68_P28307238 | chr12:28024309-28024353                           | NM_009234:3253     | Sox11         | INSIDE                 | 0.643                                                        | 0.665                          | 1290.02            | 857.63             | 0.427                          | 1168.43            | 499.42             |
| A_68_P24760940 | chr6:113646921-113646965                          | NM_001033463:-550  | Tatdn2        | PROMOTER               | 0.643                                                        | 0.310                          | 1943.88            | 603.41             | 0.200                          | 1473.06            | 294.21             |
| A_68_P31113562 | chr17:27109927-27109971                           | NM_001005916:-175  | Zbtb9         | PROMOTER               | 0.643                                                        | 0.410                          | 1334.08            | 547.14             | 0.264                          | 1046.96            | 276.11             |
| A_68_P21481086 | chr2:102914077-102914121                          | NM_019735:267      | Apip          | INSIDE                 | 0.642                                                        | 0.564                          | 964.81             | 544.20             | 0.362                          | 866.22             | 313.63             |
| A_68_P22202884 | chr3:65762093-65762137                            | NM_019937:33       | Cen1l         | INSIDE                 | 0.642                                                        | 0.497                          | 2814.84            | 1398.89            | 0.319                          | 2196.65            | 700.89             |
| A_68_P30328265 | chr15:72921187-72921231                           | NM_053068:367      | Chrac1        | INSIDE                 | 0.642                                                        | 0.448                          | 1281.58            | 573.79             | 0.288                          | 1000.24            | 287.65             |
| A_68_P21731577 | chr2:148506945-148506989                          | NM_028986:111      | Gzf1          | INSIDE                 | 0.642                                                        | 0.737                          | 2375.53            | 1750.12            | 0.473                          | 1693.37            | 800.84             |
| A_68_P23593812 | chr5:34679442-34679486                            | NM_011278:426      | Rnf4          | INSIDE                 | 0.642                                                        | 0.533                          | 1152.43            | 614.50             | 0.342                          | 904.59             | 309.47             |
| A_68_P27693351 | chr11:33102254-33102303                           | NM_019916:1310     | Tlx3          | INSIDE                 | 0.642                                                        | 4.137                          | 2358.31            | 9756.09            | 2.658                          | 1525.60            | 4054.39            |
| A_68_P20827191 | chr1:173224816-173224860                          | NM_025388:275      | Ufc1          | INSIDE                 | 0.642                                                        | 0.613                          | 2240.32            | 1372.98            | 0.394                          | 1628.28            | 641.14             |
| A_68_P30476409 | chr15:98608492-98608536                           | NM_011718:67       | Wnt10b        | INSIDE                 | 0.642                                                        | 0.733                          | 1990.71            | 1460.02            | 0.471                          | 1581.59            | 744.93             |
| A_68_P20412114 | chr1:88330989-88331033                            | NM_027966:8107     | 1700019017Rik | DOWNSTREAM             | 0.641                                                        | 0.597                          | 2890.85            | 1724.47            | 0.382                          | 2337.87            | 893.83             |
| A_68_P28182350 | chr11:119960353-119960397                         | NM_001110242:127   | 1810043H04Rik | INSIDE                 | 0.641                                                        | 0.643                          | 2765.61            | 1779.32            | 0.412                          | 2015.50            | 830.58             |
| A_68_P27835193 | chr11:58977324-58977368                           | NM_173785:-102     | A230051G13Rik | PROMOTER               | 0.641                                                        | 0.710                          | 1345.47            | 955.91             | 0.456                          | 1036.07            | 472.19             |
| A_68_P27765618 | chr11:45869772-45869816                           | NM_009616:306      | Adam19        | INSIDE                 | 0.641                                                        | 0.640                          | 1923.87            | 1232.24            | 0.411                          | 1518.19            | 623.73             |
| A_68_P29449128 | chr14:21612623-21612667                           | NM_001039138:666   | Camk2g        | INSIDE                 | 0.641                                                        | 0.738                          | 3410.83            | 2517.97            | 0.473                          | 2557.73            | 1209.41            |
| A_68_P23999718 | chr5:114185852-114185896                          | NM_001010825:84    | Fied          | INSIDE                 | 0.641                                                        | 0.455                          | 3096.15            | 1410.16            | 0.292                          | 2435.03            | 711.35             |
| A_68_P31161697 | chr17:36053340-36053384                           | NM_025878:-48      | Mrps18b       | DIVERGENT_PROMOTER     | 0.641                                                        | 0.574                          | 1546.78            | 887.48             | 0.368                          | 1262.04            | 464.16             |
| A_68_P26821060 | chr9:109834141-109834185                          | NM_001205331:-115  | Mtap4         | PROMOTER               | 0.641                                                        | 0.661                          | 1010.27            | 667.28             | 0.423                          | 961.08             | 406.93             |
| A_68_P21820255 | chr2:164705460-164705507                          | NM_146129:616      | Pcif1         | INSIDE                 | 0.641                                                        | 0.500                          | 1254.20            | 627.53             | 0.321                          | 880.58             | 282.51             |
| A_68_P27954273 | chr11:80241942-80241986                           | NM_178616:-152     | Psmc11        | PROMOTER               | 0.641                                                        | 0.624                          | 1819.27            | 1135.26            | 0.400                          | 1508.78            | 603.12             |
| A_68_P29144761 | chr13:74304464-74304508                           | NM_001081060:45524 | Sle9a3        | DOWNSTREAM             | 0.641                                                        | 0.647                          | 1075.95            | 695.72             | 0.415                          | 865.52             | 358.83             |
| A_68_P23271163 | chr4:124614216-124614260                          | NM_177573:-53      | 9930104L06Rik | DIVERGENT_PROMOTER     | 0.640                                                        | 0.656                          | 1168.39            | 766.73             | 0.420                          | 927.63             | 389.38             |

| ProbeName      | Target position of probe on CpG island microarray | TargetID            | GeneSymbol    | CpG island Description | Ratio of relative methylation (TiO <sub>2</sub> -NP/Vehicle) | Sham group                     |                    |                    | TiO <sub>2</sub> -H group      |                    |                    |
|----------------|---------------------------------------------------|---------------------|---------------|------------------------|--------------------------------------------------------------|--------------------------------|--------------------|--------------------|--------------------------------|--------------------|--------------------|
|                |                                                   |                     |               |                        |                                                              | Relative methylation (Cy5/Cy3) | Cy3 signal (Input) | Cy5 signal (MeDIP) | Relative methylation (Cy5/Cy3) | Cy3 signal (Input) | Cy5 signal (MeDIP) |
| A_68_P24098745 | chr5:132014699-132014743                          | NM_177047:1003493   | Auts2         | INSIDE                 | 0.640                                                        | 0.421                          | 1656.56            | 697.87             | 0.270                          | 1591.66            | 429.26             |
| A_68_P20265713 | chr1:59820408-59820452                            | NM_007561:-1050     | Bmpr2         | PROMOTER               | 0.640                                                        | 0.492                          | 1359.20            | 669.18             | 0.315                          | 1108.33            | 349.36             |
| A_68_P24831080 | chr6:127105235-127105279                          | NM_009829:-4190     | Cend2         | PROMOTER               | 0.640                                                        | 0.712                          | 1507.40            | 1073.68            | 0.456                          | 1322.49            | 603.22             |
| A_68_P27796702 | chr11:51781404-51781448                           | NM_029976:294       | Cdkn2aipnl    | INSIDE                 | 0.640                                                        | 0.453                          | 1411.50            | 638.77             | 0.290                          | 1139.71            | 330.17             |
| A_68_P28186831 | chr11:120657508-120657552                         | NM_026824:179       | Dus11         | INSIDE                 | 0.640                                                        | 0.632                          | 861.08             | 544.18             | 0.404                          | 746.98             | 301.96             |
| A_68_P20433001 | chr1:91827813-91827857                            | NM_010262:-83       | Gbx2          | PROMOTER               | 0.640                                                        | 0.642                          | 1031.45            | 662.60             | 0.411                          | 724.71             | 297.74             |
| A_68_P31631086 | chr18:38114645-38114689                           | NM_010411:-24       | Hdac3         | DIVERGENT_PROMOTER     | 0.640                                                        | 0.468                          | 2185.66            | 1021.91            | 0.299                          | 1667.69            | 499.29             |
| A_68_P28004885 | chr11:89160628-89160672                           | NM_008711:3223      | Nog           | DOWNSTREAM             | 0.640                                                        | 0.524                          | 1607.08            | 841.78             | 0.335                          | 1359.69            | 455.88             |
| A_68_P30421723 | chr15:88693456-88693500                           | NM_145478:855       | Pim3          | INSIDE                 | 0.640                                                        | 0.693                          | 1434.73            | 994.80             | 0.444                          | 1103.85            | 489.91             |
| A_68_P22014196 | chr3:27837925-27837969                            | NM_001164056:345    | Pld1          | INSIDE                 | 0.640                                                        | 0.604                          | 1984.92            | 1198.54            | 0.386                          | 1581.36            | 610.92             |
| A_68_P28190285 | chr11:121249100-121249144                         | NM_139147:443       | Rab40b        | INSIDE                 | 0.640                                                        | 0.592                          | 2051.82            | 1214.50            | 0.379                          | 1551.46            | 588.11             |
| A_68_P22727924 | chr4:11003258-11003303                            | NM_001085493:71     | 2310030N02Rik | INSIDE                 | 0.639                                                        | 0.508                          | 1185.00            | 602.42             | 0.325                          | 1010.87            | 328.61             |
| A_68_P30387340 | chr15:83081767-83081811                           | NM_001170954:373    | A4galt        | INSIDE                 | 0.639                                                        | 0.488                          | 1467.01            | 715.23             | 0.311                          | 1375.72            | 428.41             |
| A_68_P20395061 | chr1:82836417-82836461                            | NM_010472:381       | Agfg1         | INSIDE                 | 0.639                                                        | 0.503                          | 2044.72            | 1029.10            | 0.321                          | 1736.66            | 558.30             |
| A_68_P25089687 | chr7:52107857-52107901                            | NM_026270:3282      | Akt1s1        | INSIDE                 | 0.639                                                        | 2.612                          | 1327.96            | 3469.01            | 1.668                          | 938.04             | 1564.97            |
| A_68_P31746196 | chr18:59334709-59334753                           | NM_001081328:-263   | Chsy3         | PROMOTER               | 0.639                                                        | 0.574                          | 2107.12            | 1208.92            | 0.366                          | 1680.18            | 615.52             |
| A_68_P21087493 | chr2:27741935-27741979                            | NM_015734:12        | Col5a1        | INSIDE                 | 0.639                                                        | 0.633                          | 1692.94            | 1071.61            | 0.405                          | 1321.68            | 534.64             |
| A_68_P27281160 | chr10:79594459-79594503                           | NM_001195268:5652   | Dos           | INSIDE                 | 0.639                                                        | 0.649                          | 1352.83            | 877.60             | 0.414                          | 1025.43            | 424.80             |
| A_68_P26543335 | chr9:57556330-57556374                            | NM_153799:-23       | Edc3          | PROMOTER               | 0.639                                                        | 0.622                          | 1894.48            | 1178.32            | 0.398                          | 1420.47            | 564.74             |
| A_68_P31493012 | chr18:11048533-11048577                           | NM_010258:-3953     | Gata6         | PROMOTER               | 0.639                                                        | 0.605                          | 1283.71            | 777.13             | 0.387                          | 1095.99            | 423.72             |
| A_68_P23329327 | chr4:135129537-135129581                          | NM_001013756:-23    | Grhl3         | PROMOTER               | 0.639                                                        | 0.499                          | 1064.11            | 531.15             | 0.319                          | 890.80             | 283.90             |
| A_68_P30367930 | chr15:79521605-79521649                           | NM_013818:301       | Gtpbp1        | INSIDE                 | 0.639                                                        | 0.354                          | 2153.79            | 762.88             | 0.226                          | 1851.95            | 418.93             |
| A_68_P25528244 | chr7:138553556-138553600                          | NM_175115:414       | Ikzf5         | INSIDE                 | 0.639                                                        | 0.435                          | 1298.19            | 564.92             | 0.278                          | 1130.82            | 314.23             |
| A_68_P20935802 | chr1:192850220-192850264                          | NM_001081259:-173   | Misd7b        | PROMOTER               | 0.639                                                        | 0.549                          | 952.00             | 523.08             | 0.351                          | 736.89             | 258.77             |
| A_68_P30364397 | chr15:78940024-78940068                           | NM_177461:634       | Micall1       | INSIDE                 | 0.639                                                        | 0.394                          | 1481.73            | 584.52             | 0.252                          | 1163.41            | 293.34             |
| A_68_P30961694 | chr16:91226413-91226457                           | NM_016967:640       | Olig2         | INSIDE                 | 0.639                                                        | 0.545                          | 2814.15            | 1535.09            | 0.349                          | 2091.87            | 729.27             |
| A_68_P21839349 | chr2:167906063-167906107                          | NM_021409:-419      | Pard6b        | PROMOTER               | 0.639                                                        | 0.437                          | 1735.05            | 758.43             | 0.280                          | 1323.04            | 369.83             |
| A_68_P21322065 | chr2:71710952-71710996                            | NM_172665:-354      | Pdk1          | PROMOTER               | 0.639                                                        | 0.668                          | 901.20             | 601.73             | 0.427                          | 682.81             | 291.47             |
| A_68_P23649331 | chr5:44491778-44491823                            | NM_001163584:-5793  | Prom1         | PROMOTER               | 0.639                                                        | 0.449                          | 2239.47            | 1004.57            | 0.286                          | 1784.79            | 511.32             |
| A_68_P31196983 | chr17:44871711-44871755                           | NM_001145920:1865   | Rumx2         | INSIDE                 | 0.639                                                        | 0.512                          | 1047.42            | 536.45             | 0.327                          | 806.88             | 264.25             |
| A_68_P25588799 | chr7:148623331-148623375                          | NM_001177576:-2859  | Ste25a2       | PROMOTER               | 0.639                                                        | 0.564                          | 2863.01            | 1613.45            | 0.360                          | 2015.33            | 725.84             |
| A_68_P31160312 | chr17:35804249-35804293                           | NM_175137:267       | Vars2         | INSIDE                 | 0.639                                                        | 0.659                          | 2132.19            | 1404.93            | 0.421                          | 1507.83            | 635.08             |
| A_68_P25947576 | chr8:72149308-72149352                            | NM_001045553:-256   | Zfp868        | PROMOTER               | 0.639                                                        | 0.748                          | 3835.41            | 2867.80            | 0.478                          | 3162.71            | 1511.47            |
| A_68_P31111771 | chr17:26813342-26813386                           | NM_025272:24        | Atp6v0e       | INSIDE                 | 0.638                                                        | 0.477                          | 1213.59            | 578.99             | 0.304                          | 925.51             | 281.80             |
| A_68_P32111334 | chr19:40906541-40906585                           | NM_172839:794       | Cenj          | INSIDE                 | 0.638                                                        | 0.367                          | 1696.24            | 621.81             | 0.234                          | 1386.38            | 324.13             |
| A_68_P32053973 | chr19:29700840-29700884                           | NM_001081213:22048  | Ermp1         | INSIDE                 | 0.638                                                        | 3.951                          | 5484.76            | 21669.41           | 2.521                          | 4005.10            | 10097.35           |
| A_68_P24423937 | chr6:47544969-47545013                            | NM_001146689:39     | Ezh2          | INSIDE                 | 0.638                                                        | 0.644                          | 1090.33            | 701.77             | 0.410                          | 976.73             | 400.80             |
| A_68_P25828172 | chr8:46136729-46136773                            | NM_001081286:101189 | Fat1          | INSIDE                 | 0.638                                                        | 2.472                          | 3628.42            | 8967.89            | 1.576                          | 2402.99            | 3787.61            |
| A_68_P26520288 | chr9:53192430-53192474                            | NM_212445:325       | Kdele2        | INSIDE                 | 0.638                                                        | 0.632                          | 1068.40            | 675.49             | 0.404                          | 857.41             | 346.03             |
| A_68_P31113145 | chr17:27054067-27054111                           | NM_053173:53        | Kifc5b        | INSIDE                 | 0.638                                                        | 0.565                          | 1547.45            | 873.86             | 0.360                          | 1163.83            | 419.41             |
| A_68_P27282836 | chr10:79844946-79844990                           | NM_198615:5428      | Mex3d         | INSIDE                 | 0.638                                                        | 2.635                          | 587.52             | 1547.81            | 1.682                          | 514.30             | 864.85             |
| A_68_P22083009 | chr3:40887619-40887663                            | NM_027558:-672      | Pgrmc2        | PROMOTER               | 0.638                                                        | 0.606                          | 1226.19            | 743.43             | 0.387                          | 1036.50            | 400.86             |
| A_68_P22558738 | chr3:136332932-136332976                          | NM_008913:-779      | Ppp3ca        | PROMOTER               | 0.638                                                        | 0.400                          | 1495.87            | 597.87             | 0.255                          | 1261.42            | 321.47             |
| A_68_P30572149 | chr16:17132425-17132469                           | NM_022324:30        | Sdf2l1        | INSIDE                 | 0.638                                                        | 0.561                          | 2784.40            | 1561.61            | 0.358                          | 2256.50            | 807.17             |
| A_68_P28038653 | chr11:95275248-95275292                           | NM_025287:-126      | Spop          | PROMOTER               | 0.638                                                        | 2.705                          | 2310.60            | 6250.27            | 1.726                          | 1571.40            | 2712.43            |
| A_68_P24543641 | chr6:72739120-72739164                            | NM_001079822:-192   | Tcf7l1        | PROMOTER               | 0.638                                                        | 0.497                          | 3199.68            | 1591.50            | 0.317                          | 2630.69            | 834.83             |
| A_68_P24130232 | chr5:138883088-138883132                          | NM_028130:407       | Zfp157        | INSIDE                 | 0.638                                                        | 0.559                          | 1125.68            | 628.75             | 0.356                          | 895.87             | 319.00             |
| A_68_P20262082 | chr1:59176751-59176795                            | NM_001037812:-122   | Als2cr4       | PROMOTER               | 0.637                                                        | 0.626                          | 1856.35            | 1162.14            | 0.399                          | 1222.12            | 487.50             |
| A_68_P28524149 | chr12:72170902-72170957                           | NM_001081195:53976  | Arid4a        | INSIDE                 | 0.637                                                        | 3.138                          | 1242.63            | 3899.38            | 1.997                          | 930.82             | 1859.19            |
| A_68_P28072388 | chr11:101035404-101035448                         | NM_007721:1331      | Cer10         | INSIDE                 | 0.637                                                        | 0.568                          | 1405.57            | 798.95             | 0.362                          | 1007.15            | 364.74             |
| A_68_P27191665 | chr10:63046368-63046418                           | NM_001164376:126134 | Ctnna3        | INSIDE                 | 0.637                                                        | 2.627                          | 760.18             | 1996.91            | 1.674                          | 593.57             | 993.89             |



| ProbeName      | Target position of probe on CpG island microarray | TargetID                 | GeneSymbol    | CpG island Description | Ratio of relative methylation (TiO <sub>2</sub> -NP/Vehicle) | Sham group                     |                    |                    | TiO <sub>2</sub> -H group      |                    |                    |
|----------------|---------------------------------------------------|--------------------------|---------------|------------------------|--------------------------------------------------------------|--------------------------------|--------------------|--------------------|--------------------------------|--------------------|--------------------|
|                |                                                   |                          |               |                        |                                                              | Relative methylation (Cy5/Cy3) | Cy3 signal (Input) | Cy5 signal (MeDIP) | Relative methylation (Cy5/Cy3) | Cy3 signal (Input) | Cy5 signal (MeDIP) |
| A_68_P25776088 | chr8:35871210-35871254                            | NM_176933:569            | Dusp4         | INSIDE                 | 0.637                                                        | 0.602                          | 2469.37            | 1486.92            | 0.384                          | 1867.02            | 716.31             |
| A_68_P24586428 | chr6:81991724-81991768                            | NM_145570:125            | Fam176a       | INSIDE                 | 0.637                                                        | 0.633                          | 1449.43            | 917.63             | 0.403                          | 1219.75            | 491.76             |
| A_68_P32016080 | chr19:23215457-23215501                           | NM_010638:-237           | Klf9          | PROMOTER               | 0.637                                                        | 0.486                          | 1225.61            | 595.08             | 0.309                          | 1048.53            | 324.25             |
| A_68_P28587835 | chr12:83718196-83718240                           | NM_015812:194            | Rgs6          | INSIDE                 | 0.637                                                        | 0.584                          | 1606.29            | 937.43             | 0.372                          | 1389.97            | 517.07             |
| A_68_P20233542 | chr1:53841734-53841778                            | NM_133810:303            | Stk17b        | INSIDE                 | 0.637                                                        | 0.424                          | 1870.82            | 793.03             | 0.270                          | 1607.60            | 433.96             |
| A_68_P27340413 | chr10:90634459-90634503                           | NM_001080129:-153        | Tmpo          | PROMOTER               | 0.637                                                        | 0.532                          | 1631.07            | 868.20             | 0.339                          | 1314.71            | 445.66             |
| A_68_P20826009 | chr1:173003701-173003745                          | ENSMUST00000164179:-8656 |               | PROMOTER               | 0.637                                                        | 0.635                          | 6207.37            | 3943.81            | 0.405                          | 5287.46            | 2141.38            |
| A_68_P20596874 | chr1:129670673-129670717                          | NM_028399:-46            | Cent2         | PROMOTER               | 0.636                                                        | 0.622                          | 2718.22            | 1689.58            | 0.395                          | 2117.80            | 837.57             |
| A_68_P32097099 | chr19:37772682-37772726                           | NM_007811:407            | Cyp26a1       | INSIDE                 | 0.636                                                        | 0.685                          | 1552.26            | 1062.66            | 0.436                          | 1380.23            | 601.39             |
| A_68_P23936294 | chr5:102088064-102088108                          | NM_144955:5644           | Nkx6-1        | DOWNSTREAM             | 0.636                                                        | 0.667                          | 1836.63            | 1225.65            | 0.424                          | 1509.94            | 640.58             |
| A_68_P22310058 | chr3:87598739-87598783                            | NM_001033124:324         | Nr1k1         | INSIDE                 | 0.636                                                        | 0.691                          | 2699.07            | 1863.82            | 0.439                          | 2215.10            | 972.96             |
| A_68_P22488132 | chr3:123150107-123150151                          | NM_008939:298            | Prss12        | INSIDE                 | 0.636                                                        | 0.483                          | 1826.65            | 883.10             | 0.307                          | 1507.45            | 463.51             |
| A_68_P25362155 | chr7:106631960-106632004                          | NR_002172:-540           | Snord15a      | PROMOTER               | 0.636                                                        | 0.445                          | 1544.64            | 686.94             | 0.283                          | 1260.32            | 356.51             |
| A_68_P28974246 | chr13:40833476-40833520                           | NM_011547:-4306          | Tefap2a       | PROMOTER               | 0.636                                                        | 0.687                          | 1336.42            | 917.93             | 0.437                          | 1185.03            | 517.86             |
| A_68_P27286219 | chr10:80363610-80363656                           | NM_013895:82             | Timm13        | INSIDE                 | 0.636                                                        | 0.464                          | 1142.84            | 529.86             | 0.295                          | 897.89             | 264.69             |
| A_68_P26247733 | chr8:127317798-127317842                          | NM_198632:902            | Trim67        | INSIDE                 | 0.636                                                        | 0.644                          | 2690.72            | 1732.42            | 0.409                          | 2128.66            | 871.68             |
| A_68_P23409803 | chr4:150432014-150432058                          | NM_009498:26             | Vamp3         | INSIDE                 | 0.636                                                        | 0.349                          | 1524.16            | 532.27             | 0.222                          | 1315.57            | 292.32             |
| A_68_P29220644 | chr13:91947270-91947314                           | NM_145453:9              | Zec1          | INSIDE                 | 0.636                                                        | 0.501                          | 1717.52            | 860.32             | 0.319                          | 1415.02            | 450.99             |
| A_68_P31113295 | chr17:27076389-27076433                           | NM_026307:3              | Cuta          | INSIDE                 | 0.635                                                        | 0.361                          | 1600.29            | 578.07             | 0.229                          | 1269.62            | 291.24             |
| A_68_P21570230 | chr2:119372732-119372776                          | NM_172857:609            | Exd1          | INSIDE                 | 0.635                                                        | 0.549                          | 1903.16            | 1044.28            | 0.349                          | 1615.08            | 563.12             |
| A_68_P21073096 | chr2:25433798-25433842                            | NM_001005424:1799        | Gm996         | INSIDE                 | 0.635                                                        | 0.678                          | 1034.05            | 701.41             | 0.431                          | 814.96             | 351.21             |
| A_68_P24156244 | chr5:144131752-144131796                          | NM_133355:6188           | Grid2ip       | INSIDE                 | 0.635                                                        | 0.524                          | 1618.60            | 848.49             | 0.333                          | 1291.53            | 429.81             |
| A_68_P29725079 | chr14:75347435-75347479                           | NM_001033439:228         | Lrch1         | INSIDE                 | 0.635                                                        | 0.681                          | 2126.09            | 1447.08            | 0.432                          | 1683.23            | 727.52             |
| A_68_P29681981 | chr14:67529271-67529315                           | NM_175498:-752           | Pnma2         | PROMOTER               | 0.635                                                        | 0.474                          | 1667.09            | 790.64             | 0.301                          | 1256.84            | 378.67             |
| A_68_P27506870 | chr10:121484975-121485019                         | NM_001081037:-747        | Srgap1        | PROMOTER               | 0.635                                                        | 0.710                          | 1308.03            | 929.24             | 0.451                          | 1135.09            | 512.18             |
| A_68_P26013519 | chr8:85689979-85690023                            | NM_001111304:750         | Tbc1d9        | INSIDE                 | 0.635                                                        | 0.650                          | 1327.87            | 862.60             | 0.413                          | 1162.47            | 479.86             |
| A_68_P26706400 | chr9:87625023-87625067                            | NM_023814:1051           | Tbx18         | INSIDE                 | 0.635                                                        | 0.436                          | 1733.04            | 755.80             | 0.277                          | 1521.64            | 421.40             |
| A_68_P26721507 | chr9:91259790-91259834                            | NM_009573:825            | Zic1          | INSIDE                 | 0.635                                                        | 0.461                          | 1301.45            | 600.40             | 0.293                          | 1053.38            | 308.39             |
| A_68_P25509657 | chr7:135381773-135381817                          | NM_177001:-249           | 9130023H24Rik | PROMOTER               | 0.634                                                        | 0.692                          | 2857.26            | 1976.81            | 0.439                          | 2169.56            | 952.30             |
| A_68_P32186060 | chr19:54121227-54121271                           | NM_007417:1577           | Adra2a        | INSIDE                 | 0.634                                                        | 0.689                          | 1199.32            | 826.91             | 0.437                          | 916.79             | 400.61             |
| A_68_P29050149 | chr13:54676413-54676457                           | NM_019968:61             | Arl10         | INSIDE                 | 0.634                                                        | 0.544                          | 2082.33            | 1132.56            | 0.345                          | 1714.75            | 591.28             |
| A_68_P20786425 | chr1:165924761-165924805                          | NM_201364:130            | BC055324      | INSIDE                 | 0.634                                                        | 0.637                          | 5119.83            | 3263.62            | 0.404                          | 3884.09            | 1570.60            |
| A_68_P27894658 | chr11:69182004-69182048                           | NM_146019:902            | Chd3          | INSIDE                 | 0.634                                                        | 0.650                          | 2150.42            | 1398.55            | 0.413                          | 1538.82            | 634.86             |
| A_68_P24775469 | chr6:116158491-116158535                          | NM_026585:462            | D6Wsu116c     | INSIDE                 | 0.634                                                        | 0.541                          | 1295.52            | 700.46             | 0.343                          | 1087.33            | 372.83             |
| A_68_P21762934 | chr2:154718701-154718745                          | NM_026030:-80            | Eif2s2        | PROMOTER               | 0.634                                                        | 0.632                          | 983.75             | 622.14             | 0.401                          | 747.45             | 299.69             |
| A_68_P26893205 | chr9:123022399-123022443                          | NM_001081188:72          | Exose7        | INSIDE                 | 0.634                                                        | 0.444                          | 1766.43            | 783.61             | 0.281                          | 1468.20            | 413.17             |
| A_68_P23451685 | chr5:4757093-4757137                              | NM_021457:1102           | Fzd1          | INSIDE                 | 0.634                                                        | 0.616                          | 1047.22            | 644.60             | 0.390                          | 825.75             | 322.38             |
| A_68_P21609431 | chr2:126501251-126501295                          | NM_207669:-49            | Gabpb1        | PROMOTER               | 0.634                                                        | 0.630                          | 2080.23            | 1309.89            | 0.399                          | 1921.36            | 767.08             |
| A_68_P25462321 | chr7:126328077-126328121                          | NM_001024138:-210        | Gpr139        | PROMOTER               | 0.634                                                        | 0.569                          | 1096.54            | 623.49             | 0.360                          | 757.26             | 272.78             |
| A_68_P21536546 | chr2:113597904-113597948                          | NM_011824:879            | Grem1         | INSIDE                 | 0.634                                                        | 0.527                          | 1857.10            | 978.87             | 0.340                          | 1209.25            | 404.16             |
| A_68_P24589797 | chr6:82723544-82723588                            | NM_013820:882            | Hk2           | INSIDE                 | 0.634                                                        | 0.700                          | 1367.97            | 957.22             | 0.443                          | 1086.57            | 481.83             |
| A_68_P24431635 | chr6:49168267-49168311                            | NM_023670:-3335          | Igf2bp3       | PROMOTER               | 0.634                                                        | 0.694                          | 1529.37            | 1061.34            | 0.440                          | 1187.27            | 522.47             |
| A_68_P26815429 | chr9:108462952-108462996                          | NM_011830:143            | Impdh2        | INSIDE                 | 0.634                                                        | 0.703                          | 3132.35            | 2201.00            | 0.446                          | 2559.36            | 1140.39            |
| A_68_P24360135 | chr6:35127937-35127981                            | NM_027513:343            | Nup205        | INSIDE                 | 0.634                                                        | 0.579                          | 1249.82            | 724.04             | 0.368                          | 1063.37            | 390.85             |
| A_68_P26554372 | chr9:59464905-59464949                            | NM_001205239:-164        | Parp6         | PROMOTER               | 0.634                                                        | 0.673                          | 1353.16            | 910.63             | 0.427                          | 1197.47            | 510.94             |
| A_68_P28160473 | chr11:116485490-116485534                         | NM_001167680:54          | Rhbdl2        | INSIDE                 | 0.634                                                        | 0.579                          | 1372.87            | 794.50             | 0.367                          | 1102.26            | 404.22             |
| A_68_P22957030 | chr4:59562123-59562167                            | NM_144904:92             | Rod1          | INSIDE                 | 0.634                                                        | 0.596                          | 2044.82            | 1218.47            | 0.378                          | 1536.07            | 579.98             |
| A_68_P20022705 | chr1:9535306-9535350                              | NM_021511:-160           | Rrs1          | PROMOTER               | 0.634                                                        | 0.525                          | 1044.51            | 548.22             | 0.333                          | 846.96             | 281.96             |
| A_68_P24974126 | chr7:13595184-13595228                            | NM_001024699:-57         | Zbtb45        | PROMOTER               | 0.634                                                        | 0.606                          | 1005.90            | 609.91             | 0.384                          | 753.09             | 289.51             |
| A_68_P23339578 | chr4:136944088-136944132                          | ENSMUST00000078305:-7097 |               | PROMOTER               | 0.634                                                        | 0.617                          | 1364.89            | 841.92             | 0.391                          | 1110.30            | 433.94             |
| A_68_P27928205 | chr11:75608766-75608811                           | NM_007873:771            | Doc2b         | INSIDE                 | 0.633                                                        | 0.689                          | 1849.08            | 1273.82            | 0.436                          | 1455.04            | 634.03             |

| ProbeName      | Target position of probe on CpG island microarray | TargetID                 | GeneSymbol    | CpG island Description | Ratio of relative methylation (TiO <sub>2</sub> -NP/Vehicle) | Sham group                     |                    |                    | TiO <sub>2</sub> -H group      |                    |                    |
|----------------|---------------------------------------------------|--------------------------|---------------|------------------------|--------------------------------------------------------------|--------------------------------|--------------------|--------------------|--------------------------------|--------------------|--------------------|
|                |                                                   |                          |               |                        |                                                              | Relative methylation (Cy5/Cy3) | Cy3 signal (Input) | Cy5 signal (MeDIP) | Relative methylation (Cy5/Cy3) | Cy3 signal (Input) | Cy5 signal (MeDIP) |
| A_68_P30497455 | chr15:102189021-102189065                         | NM_130458:7660           | Sp7           | INSIDE                 | 0.633                                                        | 0.631                          | 899.42             | 567.58             | 0.399                          | 732.98             | 292.80             |
| A_68_P25195709 | chr7:74904507-74904551                            | NM_183312:100            | Synn          | INSIDE                 | 0.633                                                        | 0.428                          | 3143.10            | 1344.47            | 0.271                          | 2529.27            | 684.46             |
| A_68_P24053752 | chr5:123526651-123526695                          | NM_001039723:389         | Tmem120b      | INSIDE                 | 0.633                                                        | 0.294                          | 1826.77            | 537.00             | 0.186                          | 1374.88            | 255.77             |
| A_68_P20893085 | chr1:185857220-185857264                          | NM_028516:635            | 1700056E22Rik | INSIDE                 | 0.632                                                        | 0.641                          | 1625.01            | 1041.74            | 0.405                          | 1221.15            | 494.90             |
| A_68_P24464807 | chr6:54632035-54632079                            | NM_026629:291            | 2410066E13Rik | INSIDE                 | 0.632                                                        | 0.590                          | 1040.73            | 613.55             | 0.373                          | 893.50             | 333.04             |
| A_68_P25655856 | chr8:114975671-11497611                           | NM_026995:21             | Carkd         | INSIDE                 | 0.632                                                        | 0.426                          | 1901.22            | 809.80             | 0.269                          | 1558.69            | 419.41             |
| A_68_P24791601 | chr6:119125187-119125231                          | NM_001033379:-62         | Dep1b         | PROMOTER               | 0.632                                                        | 0.555                          | 1294.89            | 718.25             | 0.351                          | 1091.87            | 382.79             |
| A_68_P31928718 | chr19:5447671-5447715                             | NM_010235:-5             | Fosl1         | PROMOTER               | 0.632                                                        | 0.622                          | 1066.72            | 663.68             | 0.393                          | 950.71             | 373.71             |
| A_68_P26228651 | chr8:124276830-124276874                          | NM_020605:22394          | Jph3          | INSIDE                 | 0.632                                                        | 4.407                          | 713.02             | 3142.37            | 2.786                          | 541.11             | 1507.67            |
| A_68_P25507196 | chr7:134913351-134913395                          | NM_198424:44             | Orai3         | INSIDE                 | 0.632                                                        | 0.601                          | 964.23             | 579.78             | 0.380                          | 772.09             | 293.24             |
| A_68_P20611336 | chr1:132612197-132612241                          | NM_001162416:-1065       | Pfkfb2        | PROMOTER               | 0.632                                                        | 0.719                          | 1983.00            | 1426.16            | 0.454                          | 1578.71            | 717.52             |
| A_68_P24604963 | chr6:85382060-85382104                            | NM_144918:113            | Smyd5         | INSIDE                 | 0.632                                                        | 0.612                          | 1158.73            | 708.80             | 0.387                          | 828.46             | 320.23             |
| A_68_P23062262 | chr4:83063627-83063671                            | NM_029949:1              | Snapc3        | INSIDE                 | 0.632                                                        | 0.477                          | 1983.02            | 945.11             | 0.301                          | 1568.90            | 472.77             |
| A_68_P20304765 | chr1:66863691-66863735                            | NM_001122738:457         | 1110028C15Rik | INSIDE                 | 0.631                                                        | 0.632                          | 979.39             | 619.21             | 0.399                          | 800.69             | 319.66             |
| A_68_P31849681 | chr18:78012952-78012997                           | NM_007505:468            | Atp5a1        | INSIDE                 | 0.631                                                        | 0.550                          | 2082.15            | 1144.89            | 0.347                          | 1835.81            | 636.47             |
| A_68_P21572764 | chr2:119853205-119853250                          | NM_001114637:9           | Fmj1d7        | INSIDE                 | 0.631                                                        | 0.580                          | 1744.85            | 1011.54            | 0.366                          | 1471.50            | 538.00             |
| A_68_P24660675 | chr6:95067758-95067802                            | NM_001008785:-119        | Kbtbd8        | PROMOTER               | 0.631                                                        | 0.493                          | 1453.92            | 716.41             | 0.311                          | 1223.34            | 380.35             |
| A_68_P20593981 | chr1:129102201-129102245                          | NM_145128:660            | Mgat5         | INSIDE                 | 0.631                                                        | 0.377                          | 2212.75            | 834.77             | 0.238                          | 1756.59            | 417.87             |
| A_68_P32143106 | chr19:46383535-46383579                           | NM_001177370:3137        | NfkB2         | INSIDE                 | 0.631                                                        | 0.567                          | 1753.43            | 994.37             | 0.358                          | 1356.57            | 485.49             |
| A_68_P25500411 | chr7:133572604-133572648                          | NM_030566:346            | Rabep2        | INSIDE                 | 0.631                                                        | 0.375                          | 1911.48            | 716.57             | 0.236                          | 1552.20            | 367.06             |
| A_68_P29448256 | chr14:21493458-21493502                           | NM_001168273:-62         | Sec24c        | DIVERGENT_PROMOTER     | 0.631                                                        | 0.497                          | 1200.16            | 596.51             | 0.313                          | 1039.54            | 325.78             |
| A_68_P30964217 | chr16:91660217-91660261                           | NM_019973:12170          | Son           | INSIDE                 | 0.631                                                        | 2.702                          | 598.42             | 1617.13            | 1.705                          | 534.39             | 910.91             |
| A_68_P29286848 | chr13:104564132-104564176                         | NM_172592:-9492          | Srek1         | PROMOTER               | 0.631                                                        | 0.560                          | 1868.39            | 1046.08            | 0.354                          | 1663.54            | 588.15             |
| A_68_P24037873 | chr5:120752578-120752622                          | chr5:120752578-120752622 | Unknown       | Unknown                | 0.631                                                        | 0.565                          | 1554.68            | 878.25             | 0.356                          | 1259.76            | 448.82             |
| A_68_P28753095 | chr12:114115760-114115804                         | AK018992:-1757           |               | PROMOTER               | 0.631                                                        | 0.695                          | 1249.18            | 868.25             | 0.439                          | 1053.27            | 462.24             |
| A_68_P23542801 | chr5:24083043-24083087                            | NM_001190443:221         | Abcf2         | INSIDE                 | 0.630                                                        | 0.639                          | 2154.11            | 1376.27            | 0.403                          | 1492.52            | 601.00             |
| A_68_P20429508 | chr1:91351074-91351118                            | NM_001037136:-289        | Agap1         | PROMOTER               | 0.630                                                        | 0.599                          | 1031.65            | 617.65             | 0.377                          | 954.07             | 359.59             |
| A_68_P31541309 | chr18:20904102-20904146                           | NM_019737:781            | B4galt6       | INSIDE                 | 0.630                                                        | 0.559                          | 3266.39            | 1827.17            | 0.352                          | 2408.73            | 848.99             |
| A_68_P24990312 | chr7:19477759-19477803                            | NM_001033314:17973       | Ccdc61        | INSIDE                 | 0.630                                                        | 0.421                          | 1511.52            | 636.40             | 0.265                          | 1289.45            | 341.99             |
| A_68_P23342966 | chr4:137514008-137514052                          | NM_199307:95879          | Eec1          | INSIDE                 | 0.630                                                        | 3.308                          | 2803.57            | 9274.59            | 2.085                          | 2035.51            | 4243.58            |
| A_68_P26058236 | chr8:93837616-93837660                            | NM_011936:215            | Fto           | INSIDE                 | 0.630                                                        | 0.579                          | 1268.19            | 734.29             | 0.365                          | 940.46             | 343.04             |
| A_68_P25736445 | chr8:28195931-28195975                            | NM_054044:-360           | Gpr124        | PROMOTER               | 0.630                                                        | 0.559                          | 1132.18            | 633.02             | 0.352                          | 1019.07            | 359.21             |
| A_68_P24008165 | chr5:115608256-115608300                          | NM_175403:-93            | Mlec          | PROMOTER               | 0.630                                                        | 0.384                          | 2003.34            | 770.11             | 0.242                          | 1630.56            | 395.04             |
| A_68_P26985108 | chr10:19868390-19868434                           | NM_001198635:-313        | Mtap7         | PROMOTER               | 0.630                                                        | 0.627                          | 960.34             | 601.97             | 0.395                          | 830.65             | 328.19             |
| A_68_P24819298 | chr6:125141713-125141757                          | NM_146171:-130           | Ncapd2        | DIVERGENT_PROMOTER     | 0.630                                                        | 0.547                          | 1865.58            | 1021.21            | 0.345                          | 1373.52            | 473.75             |
| A_68_P22393113 | chr3:104584603-104584647                          | NM_027982:651            | Ppm1j         | INSIDE                 | 0.630                                                        | 0.655                          | 1650.21            | 1080.34            | 0.413                          | 1328.57            | 548.04             |
| A_68_P23440513 | chr4:155144647-155144691                          | NM_147776:4002           | Vwa1          | INSIDE                 | 0.630                                                        | 0.560                          | 1129.99            | 633.04             | 0.353                          | 937.60             | 331.16             |
| A_68_P25416834 | chr7:118199064-118199108                          | NM_009431:26622          | Ctr9          | INSIDE                 | 0.629                                                        | 2.955                          | 630.19             | 1862.12            | 1.860                          | 559.19             | 1040.14            |
| A_68_P24218731 | chr6:6813573-6813617                              | NM_010057:261            | Dlx6          | INSIDE                 | 0.629                                                        | 0.518                          | 3828.75            | 1984.03            | 0.326                          | 3140.88            | 1023.77            |
| A_68_P31929504 | chr19:5568132-5568176                             | NM_001033448:81          | Gm962         | INSIDE                 | 0.629                                                        | 0.497                          | 1629.72            | 810.65             | 0.313                          | 1261.36            | 394.82             |
| A_68_P27279739 | chr10:79384461-79384505                           | NM_053244:4767           | Kiss1r        | INSIDE                 | 0.629                                                        | 0.411                          | 1414.74            | 581.63             | 0.259                          | 1146.57            | 296.50             |
| A_68_P27536901 | chr10:127030734-127030787                         | NM_008512:27444          | Lrp1          | INSIDE                 | 0.629                                                        | 2.985                          | 1284.50            | 3833.85            | 1.877                          | 943.04             | 1770.01            |
| A_68_P31143941 | chr17:32280371-32280415                           | NM_008716:23405          | Notch3        | INSIDE                 | 0.629                                                        | 0.633                          | 1371.65            | 868.42             | 0.398                          | 1249.43            | 497.62             |
| A_68_P25957205 | chr8:74031894-74031938                            | NM_032398:3752           | Plvap         | INSIDE                 | 0.629                                                        | 0.623                          | 2304.19            | 1436.26            | 0.392                          | 1844.09            | 722.71             |
| A_68_P31205623 | chr17:46339517-46339561                           | NM_030715:36             | Polh          | INSIDE                 | 0.629                                                        | 0.670                          | 2337.58            | 1565.75            | 0.421                          | 1891.15            | 797.00             |
| A_68_P29507007 | chr14:31438823-31438867                           | NM_011103:550            | Prkcd         | INSIDE                 | 0.629                                                        | 2.446                          | 6147.13            | 15036.60           | 1.538                          | 3438.11            | 5286.19            |
| A_68_P21138067 | chr2:35992191-35992235                            | NM_001159635:12          | Rbm18         | INSIDE                 | 0.629                                                        | 0.469                          | 1495.94            | 701.46             | 0.295                          | 1171.16            | 345.47             |
| A_68_P29605238 | chr14:52817188-52817232                           | NM_033618:-296           | Supt16h       | PROMOTER               | 0.629                                                        | 0.713                          | 1878.41            | 1339.91            | 0.449                          | 1684.43            | 755.82             |
| A_68_P28087055 | chr11:103635334-103635379                         | NM_009521:-132           | Wnt3          | PROMOTER               | 0.629                                                        | 0.568                          | 1040.45            | 590.64             | 0.357                          | 884.95             | 316.13             |
| A_68_P26600191 | chr9:67481194-67481238                            |                          | Unknown       | Unknown                | 0.629                                                        | 0.539                          | 1794.58            | 968.01             | 0.339                          | 1576.75            | 534.87             |
| A_68_P23005994 | chr4:70071277-70071321                            | NM_145990:103            | Cdk5rap2      | INSIDE                 | 0.628                                                        | 0.572                          | 1910.35            | 1093.22            | 0.360                          | 1466.55            | 527.45             |

| ProbeName      | Target position of probe on CpG island microarray | TargetID                | GeneSymbol   | CpG island Description | Ratio of relative methylation (TiO <sub>2</sub> -NP/Vehicle) | Sham group                     |                    |                    | TiO <sub>2</sub> -H group      |                    |                    |
|----------------|---------------------------------------------------|-------------------------|--------------|------------------------|--------------------------------------------------------------|--------------------------------|--------------------|--------------------|--------------------------------|--------------------|--------------------|
|                |                                                   |                         |              |                        |                                                              | Relative methylation (Cy5/Cy3) | Cy3 signal (Input) | Cy5 signal (MeDIP) | Relative methylation (Cy5/Cy3) | Cy3 signal (Input) | Cy5 signal (MeDIP) |
| A_68_P24167577 | chr5:147072524-147072578                          | NM_153599:29300         | Cdk8         | INSIDE                 | 0.628                                                        | 3.728                          | 301.16             | 1122.79            | 2.340                          | 284.14             | 664.76             |
| A_68_P24141811 | chr5:141000117-141000161                          | NM_021528:18576         | Chst12       | INSIDE                 | 0.628                                                        | 3.118                          | 3628.19            | 11313.18           | 1.960                          | 2600.06            | 5095.03            |
| A_68_P25951442 | chr8:72899053-72899099                            | NM_016685:1630          | Comp         | INSIDE                 | 0.628                                                        | 0.579                          | 2072.65            | 1200.28            | 0.364                          | 1575.08            | 572.82             |
| A_68_P20157022 | chr1:38055055-38055099                            | NM_198303:222           | Eif5b        | INSIDE                 | 0.628                                                        | 0.707                          | 1327.07            | 938.31             | 0.444                          | 1144.07            | 508.22             |
| A_68_P32117376 | chr19:41904363-41904407                           | NM_008043:-75           | Frat1        | PROMOTER               | 0.628                                                        | 0.617                          | 1990.52            | 1228.56            | 0.387                          | 1661.84            | 643.79             |
| A_68_P28158434 | chr11:116142875-116142919                         | NM_010254:644           | Galr2        | INSIDE                 | 0.628                                                        | 0.435                          | 1715.76            | 745.91             | 0.273                          | 1323.62            | 361.38             |
| A_68_P27565570 | chr11:5802331-5802375                             | NM_010292:47250         | Gek          | INSIDE                 | 0.628                                                        | 0.650                          | 837.86             | 544.37             | 0.408                          | 744.34             | 303.83             |
| A_68_P21338645 | chr2:74506594-74506638                            | NM_008275:250           | Hoxd13       | INSIDE                 | 0.628                                                        | 0.617                          | 3313.08            | 2045.71            | 0.388                          | 2518.88            | 976.32             |
| A_68_P26228499 | chr8:124254393-124254437                          | NM_020605:-44           | Jph3         | PROMOTER               | 0.628                                                        | 3.411                          | 9864.62            | 33653.00           | 2.144                          | 8324.80            | 17848.18           |
| A_68_P23527432 | chr5:21207260-21207304                            | NM_178728:-119          | Napepld      | PROMOTER               | 0.628                                                        | 0.666                          | 3288.87            | 2189.42            | 0.418                          | 2663.73            | 1112.75            |
| A_68_P24059409 | chr5:124571234-124571278                          | NM_011256:95171         | Pitpnm2      | INSIDE                 | 0.628                                                        | 3.626                          | 631.12             | 2288.74            | 2.276                          | 551.76             | 1255.76            |
| A_68_P24834768 | chr6:127718939-127718983                          | NM_201371:-213          | Prrt8        | PROMOTER               | 0.628                                                        | 0.541                          | 1630.42            | 881.85             | 0.340                          | 1227.04            | 416.85             |
| A_68_P23294682 | chr4:128735948-128735992                          | NM_029219:456           | Rnf19b       | INSIDE                 | 0.628                                                        | 0.564                          | 3204.02            | 1808.51            | 0.355                          | 2596.62            | 920.73             |
| A_68_P24591261 | chr6:83021489-83021533                            | NM_009392:-1291         | Tlx2         | DIVERGENT_PROMOTER     | 0.628                                                        | 0.418                          | 1760.59            | 735.92             | 0.262                          | 1491.91            | 391.43             |
| A_68_P26084569 | chr8:98201452-98201496                            | ENSMUST00000041318:-510 |              | PROMOTER               | 0.628                                                        | 0.369                          | 2092.09            | 771.70             | 0.232                          | 1604.27            | 371.74             |
| A_68_P31776698 | chr18:64819777-64819821                           | NM_001001488:856        | Atp8b1       | INSIDE                 | 0.627                                                        | 2.636                          | 1212.06            | 3194.80            | 1.652                          | 1067.03            | 1762.54            |
| A_68_P30348812 | chr15:76342113-76342157                           | NM_010046:114           | Dgat1        | INSIDE                 | 0.627                                                        | 0.689                          | 2411.73            | 1660.52            | 0.432                          | 1886.27            | 814.94             |
| A_68_P22481535 | chr3:121977658-121977702                          | NM_153806:349           | Dnrtip2      | INSIDE                 | 0.627                                                        | 0.644                          | 2361.54            | 1521.84            | 0.404                          | 1831.98            | 740.02             |
| A_68_P24603562 | chr6:85138183-85138227                            | NM_010131:280           | Emx1         | INSIDE                 | 0.627                                                        | 0.674                          | 1104.60            | 744.62             | 0.423                          | 943.13             | 398.48             |
| A_68_P24002948 | chr5:114724032-114724076                          | NM_148935:-284          | Foxn4        | PROMOTER               | 0.627                                                        | 0.538                          | 1086.21            | 584.61             | 0.338                          | 861.39             | 290.73             |
| A_68_P25953468 | chr8:73223214-73223258                            | NM_010592:1599          | Jund         | INSIDE                 | 0.627                                                        | 0.512                          | 1154.87            | 591.68             | 0.321                          | 776.61             | 249.48             |
| A_68_P25174079 | chr7:71036675-71036719                            | NM_021366:47105         | Klfl3        | INSIDE                 | 0.627                                                        | 2.450                          | 789.09             | 1933.59            | 1.537                          | 659.13             | 1013.13            |
| A_68_P23006658 | chr4:70196288-70196332                            | NM_172694:-348          | Megf9        | PROMOTER               | 0.627                                                        | 0.437                          | 1205.86            | 527.14             | 0.274                          | 1004.73            | 275.61             |
| A_68_P24610519 | chr6:86475835-86475879                            | NM_011865:303           | Pcbp1        | INSIDE                 | 0.627                                                        | 0.549                          | 1089.32            | 598.13             | 0.344                          | 781.72             | 268.95             |
| A_68_P30496839 | chr15:102077744-102077788                         | NM_001042727:-983       | Rarg         | PROMOTER               | 0.627                                                        | 0.484                          | 1077.53            | 522.05             | 0.304                          | 882.94             | 268.37             |
| A_68_P25262216 | chr7:86762430-86762474                            | NM_019799:91            | Rheg         | INSIDE                 | 0.627                                                        | 0.550                          | 1137.87            | 626.33             | 0.345                          | 872.04             | 301.05             |
| A_68_P26344895 | chr9:20780976-20781020                            | NM_010333:239           | S1pr2        | INSIDE                 | 0.627                                                        | 0.379                          | 1860.91            | 705.48             | 0.238                          | 1518.23            | 360.79             |
| A_68_P25100828 | chr7:53965985-53966029                            | NM_030233:15            | Saal1        | INSIDE                 | 0.627                                                        | 0.632                          | 1392.36            | 880.50             | 0.396                          | 1171.80            | 464.41             |
| A_68_P31868115 | chr18:81184119-81184163                           | NM_178280:-823          | Sall3        | PROMOTER               | 0.627                                                        | 0.600                          | 2579.41            | 1548.67            | 0.377                          | 2060.63            | 776.29             |
| A_68_P25023458 | chr7:29551865-29551909                            | NM_001122765:116        | Sirt2        | INSIDE                 | 0.627                                                        | 0.640                          | 1524.09            | 974.95             | 0.401                          | 1180.08            | 473.61             |
| A_68_P29211818 | chr13:90229540-90229584                           | NM_025335:291           | Tmem167      | INSIDE                 | 0.627                                                        | 0.577                          | 1913.81            | 1104.10            | 0.362                          | 1438.59            | 520.70             |
| A_68_P24007965 | chr5:115577169-115577225                          | NM_175352:7788          | Unc119b      | INSIDE                 | 0.627                                                        | 3.482                          | 399.10             | 1389.78            | 2.182                          | 342.83             | 748.07             |
| A_68_P28153350 | chr11:115274720-115274764                         | NM_027862:6491          | Atp5h        | DOWNSTREAM             | 0.626                                                        | 0.324                          | 1681.50            | 544.65             | 0.203                          | 1313.19            | 266.33             |
| A_68_P30532560 | chr16:8424805-8424849                             | NM_029070:403           | Cldn26       | INSIDE                 | 0.626                                                        | 0.568                          | 1407.49            | 799.30             | 0.356                          | 1205.20            | 428.55             |
| A_68_P22998988 | chr4:68615056-68615100                            | NM_019967:353           | Dbc1         | INSIDE                 | 0.626                                                        | 0.560                          | 1044.33            | 584.64             | 0.351                          | 699.53             | 245.32             |
| A_68_P26249220 | chr8:127578421-127578465                          | NM_174853:348           | Disc1        | INSIDE                 | 0.626                                                        | 0.636                          | 1507.71            | 959.49             | 0.398                          | 1281.30            | 510.18             |
| A_68_P29651453 | chr14:62308585-62308640                           | NR_028264:-7402         | Dleu2        | PROMOTER               | 0.626                                                        | 0.658                          | 1112.26            | 731.90             | 0.412                          | 960.19             | 395.76             |
| A_68_P29582178 | chr14:48037787-48037833                           | NM_144553:272           | Dlgap5       | INSIDE                 | 0.626                                                        | 0.587                          | 1015.43            | 596.15             | 0.368                          | 726.20             | 266.99             |
| A_68_P23970975 | chr5:108698202-108698246                          | NM_026106:309           | Dr1          | INSIDE                 | 0.626                                                        | 0.692                          | 1479.65            | 1023.38            | 0.433                          | 1373.15            | 594.14             |
| A_68_P27479719 | chr10:116584876-116584920                         | NM_177798:632           | Frs2         | INSIDE                 | 0.626                                                        | 0.734                          | 2670.68            | 1961.34            | 0.460                          | 1711.13            | 786.38             |
| A_68_P29073062 | chr13:58503740-58503784                           | NM_025279:115           | Hnrmpk       | INSIDE                 | 0.626                                                        | 0.613                          | 898.64             | 550.43             | 0.384                          | 755.18             | 289.67             |
| A_68_P21203200 | chr2:49474749-49474793                            | NM_008449:-63           | Kif5c        | PROMOTER               | 0.626                                                        | 0.582                          | 1030.88            | 599.73             | 0.364                          | 858.34             | 312.44             |
| A_68_P21817648 | chr2:164230100-164230144                          | NM_013592:-8            | Matn4        | PROMOTER               | 0.626                                                        | 0.426                          | 1891.65            | 806.02             | 0.267                          | 1543.94            | 412.07             |
| A_68_P31629954 | chr18:37927868-37927912                           | NM_033595:2657          | Pedhga12     | INSIDE                 | 0.626                                                        | 2.467                          | 799.41             | 1972.00            | 1.544                          | 724.94             | 1119.06            |
| A_68_P22386744 | chr3:103379702-103379746                          | NM_018800:521           | Syt6         | INSIDE                 | 0.626                                                        | 0.631                          | 840.40             | 530.69             | 0.395                          | 752.89             | 297.67             |
| A_68_P22342447 | chr3:94944410-94944458                            | NM_027206:1848          | Tnfrsf812    | INSIDE                 | 0.626                                                        | 5.217                          | 2252.92            | 11753.35           | 3.264                          | 1502.71            | 4904.67            |
| A_68_P31102171 | chr17:25325763-25325807                           | NM_001197024:440        | Unkl         | INSIDE                 | 0.626                                                        | 0.446                          | 1153.78            | 514.61             | 0.279                          | 1027.76            | 287.03             |
| A_68_P22970353 | chr4:63077625-63077669                            | NM_001008797:16710      | Whrn         | INSIDE                 | 0.626                                                        | 2.656                          | 3032.62            | 8053.90            | 1.661                          | 2170.31            | 3605.79            |
| A_68_P31615278 | chr18:35047273-35047317                           |                         | Unknown      |                        | 0.626                                                        | 0.587                          | 1840.24            | 1079.92            | 0.367                          | 1573.37            | 577.90             |
| A_68_P24183981 | chr5:150040843-150040887                          | AK155259:18394          |              | DOWNSTREAM             | 0.626                                                        | 0.656                          | 1546.10            | 1013.86            | 0.411                          | 1369.89            | 562.72             |
| A_68_P24172796 | chr5:148086210-148086254                          | NR_038157:-3135         | 221001911Rik | PROMOTER               | 0.625                                                        | 0.522                          | 1982.01            | 1035.05            | 0.326                          | 1761.65            | 575.12             |

| ProbeName      | Target position of probe on CpG island microarray | TargetID                 | GeneSymbol    | CpG island Description | Ratio of relative methylation (TiO <sub>2</sub> -NP/Vehicle) | Sham group                     |                    |                    | TiO <sub>2</sub> -H group      |                    |                    |
|----------------|---------------------------------------------------|--------------------------|---------------|------------------------|--------------------------------------------------------------|--------------------------------|--------------------|--------------------|--------------------------------|--------------------|--------------------|
|                |                                                   |                          |               |                        |                                                              | Relative methylation (Cy5/Cy3) | Cy3 signal (Input) | Cy5 signal (MeDIP) | Relative methylation (Cy5/Cy3) | Cy3 signal (Input) | Cy5 signal (MeDIP) |
| A_68_P31114504 | chr17:27270575-27270620                           | NM_026063:239            | 2900010M23Rik | INSIDE                 | 0.625                                                        | 0.666                          | 2784.56            | 1854.97            | 0.416                          | 2154.48            | 896.31             |
| A_68_P22149462 | chr3:54539562-54539606                            | NM_025442:124            | Alg5          | INSIDE                 | 0.625                                                        | 0.553                          | 1629.65            | 901.92             | 0.346                          | 1252.56            | 432.93             |
| A_68_P23345849 | chr4:138011542-138011586                          | NM_025451:502            | Camk2n1       | INSIDE                 | 0.625                                                        | 0.631                          | 1900.64            | 1199.08            | 0.394                          | 1338.71            | 528.10             |
| A_68_P27284472 | chr10:80097247-80097291                           | NM_001159591:4868        | Csnk1g2       | INSIDE                 | 0.625                                                        | 2.677                          | 2810.08            | 7522.39            | 1.673                          | 1993.33            | 3334.83            |
| A_68_P29110676 | chr13:68721046-68721090                           | NM_027123:-56            | Fastkd3       | DIVERGENT_PROMOTER     | 0.625                                                        | 0.626                          | 2254.47            | 1411.85            | 0.391                          | 1937.62            | 758.54             |
| A_68_P23968440 | chr5:108154062-108154106                          | NM_010278:-721           | Gfi1          | PROMOTER               | 0.625                                                        | 0.488                          | 1271.79            | 620.83             | 0.305                          | 1042.16            | 317.71             |
| A_68_P22405342 | chr3:107082078-107082122                          | NM_026774:325            | Hbxip         | INSIDE                 | 0.625                                                        | 0.467                          | 1942.45            | 907.77             | 0.292                          | 1409.57            | 411.88             |
| A_68_P29581906 | chr14:47993698-47993742                           | NM_001145953:186         | Lgals3        | INSIDE                 | 0.625                                                        | 0.638                          | 1990.11            | 1270.59            | 0.399                          | 1817.17            | 725.14             |
| A_68_P22289190 | chr3:83959655-83959699                            | NM_029797:32             | Mnd1          | INSIDE                 | 0.625                                                        | 0.562                          | 2696.81            | 1514.78            | 0.351                          | 2103.73            | 738.87             |
| A_68_P30132613 | chr15:35225986-35226030                           | NM_054049:142            | Osr2          | INSIDE                 | 0.625                                                        | 0.547                          | 1390.27            | 760.71             | 0.342                          | 1015.68            | 347.19             |
| A_68_P28291148 | chr12:25393461-25393505                           | NM_009104:364            | Rrm2          | INSIDE                 | 0.625                                                        | 0.701                          | 1467.99            | 1029.07            | 0.438                          | 1087.94            | 476.86             |
| A_68_P27804859 | chr11:53270871-53270915                           | NM_027917:186            | Shroom1       | INSIDE                 | 0.625                                                        | 0.380                          | 1868.92            | 710.80             | 0.238                          | 1462.56            | 347.79             |
| A_68_P30485728 | chr15:100253426-100253470                         | NM_008732:38             | Stc11a2       | INSIDE                 | 0.625                                                        | 0.409                          | 2542.12            | 1039.85            | 0.256                          | 2195.62            | 561.25             |
| A_68_P30342961 | chr15:75447233-75447277                           | NM_001044718:140         | Zfp41         | INSIDE                 | 0.625                                                        | 0.412                          | 1561.99            | 644.23             | 0.258                          | 1111.18            | 286.26             |
| A_68_P25007553 | chr7:25740497-25740541                            |                          |               | Unknown                | 0.625                                                        | 0.352                          | 1919.09            | 675.28             | 0.220                          | 1598.64            | 351.47             |
| A_68_P25438698 | chr7:122071148-122071192                          | ENSMUST00000059737:70    |               | INSIDE                 | 0.625                                                        | 2.853                          | 1220.64            | 3482.95            | 1.784                          | 995.47             | 1775.99            |
| A_68_P23331981 | chr4:135637926-135637970                          | ENSMUST00000121307:-7061 |               | PROMOTER               | 0.625                                                        | 0.477                          | 2704.07            | 1289.31            | 0.298                          | 2176.79            | 649.00             |
| A_68_P27317703 | chr10:86521047-86521091                           | NM_029685:278            | 1700113H08Rik | INSIDE                 | 0.624                                                        | 0.575                          | 1156.61            | 665.29             | 0.359                          | 870.51             | 312.44             |
| A_68_P27282039 | chr10:79723618-79723662                           | NM_010255:73             | Gamt          | INSIDE                 | 0.624                                                        | 0.614                          | 1077.94            | 662.22             | 0.383                          | 887.24             | 339.90             |
| A_68_P25504680 | chr7:134376542-134376586                          | NR_030674:80             | Gm4532        | INSIDE                 | 0.624                                                        | 0.614                          | 1378.69            | 846.77             | 0.383                          | 1128.24            | 432.07             |
| A_68_P26458695 | chr9:42752086-42752130                            | NM_175481:346            | Grik4         | INSIDE                 | 0.624                                                        | 3.936                          | 10800.17           | 42505.35           | 2.454                          | 6227.14            | 15282.22           |
| A_68_P25279939 | chr7:90014474-90014518                            | NM_175366:-1346          | Mex3b         | PROMOTER               | 0.624                                                        | 0.515                          | 3217.05            | 1657.68            | 0.322                          | 2574.17            | 827.85             |
| A_68_P26068080 | chr8:95351388-95351432                            | NM_008610:184            | Mmp2          | INSIDE                 | 0.624                                                        | 0.530                          | 1233.21            | 653.13             | 0.330                          | 971.02             | 320.76             |
| A_68_P20795497 | chr1:167564136-167564180                          | NM_001001880:514         | Mpzl1         | INSIDE                 | 0.624                                                        | 0.675                          | 1095.66            | 739.84             | 0.421                          | 918.17             | 386.86             |
| A_68_P28457446 | chr12:57635707-57635751                           | NM_001146198:365         | Nkx2-1        | INSIDE                 | 0.624                                                        | 0.522                          | 1497.94            | 781.79             | 0.325                          | 1359.08            | 442.38             |
| A_68_P30826536 | chr16:65815148-65815192                           | NM_028572:-707           | Vgll3         | PROMOTER               | 0.624                                                        | 0.624                          | 1090.77            | 680.92             | 0.390                          | 952.90             | 371.16             |
| A_68_P30344506 | chr15:75672397-75672441                           | NM_172121:-80            | Zc3h3         | PROMOTER               | 0.624                                                        | 0.469                          | 1120.24            | 524.92             | 0.292                          | 858.42             | 250.86             |
| A_68_P27830258 | chr11:58120752-58120796                           | NM_001040686:204         | Zfp692        | INSIDE                 | 0.624                                                        | 0.616                          | 1151.09            | 708.82             | 0.384                          | 948.30             | 364.10             |
| A_68_P27851352 | chr1:61770486-61770530                            | ENSMUST00000136971:197   |               | INSIDE                 | 0.624                                                        | 0.628                          | 1093.46            | 686.80             | 0.392                          | 980.30             | 384.11             |
| A_68_P26920085 | chr10:7382878-7382922                             | NR_030698:-268           | A630066F11Rik | PROMOTER               | 0.623                                                        | 0.672                          | 1249.75            | 840.30             | 0.419                          | 1076.44            | 450.76             |
| A_68_P26129050 | chr8:107065100-107065144                          | NM_053070:416            | Car7          | INSIDE                 | 0.623                                                        | 0.616                          | 1457.84            | 898.37             | 0.384                          | 1326.11            | 509.07             |
| A_68_P22964275 | chr4:62069685-62069729                            | NM_139291:-49            | Cdc26         | DIVERGENT_PROMOTER     | 0.623                                                        | 0.508                          | 1093.77            | 555.39             | 0.316                          | 846.94             | 268.04             |
| A_68_P30486145 | chr15:100325764-100325808                         | NM_153407:-116           | Csrnp2        | PROMOTER               | 0.623                                                        | 0.631                          | 1488.54            | 939.42             | 0.393                          | 1158.38            | 455.09             |
| A_68_P22398584 | chr3:105490057-105490101                          | NM_017397:411            | Ddx20         | INSIDE                 | 0.623                                                        | 0.625                          | 955.34             | 596.94             | 0.389                          | 797.36             | 310.28             |
| A_68_P21905657 | chr2:180436282-180436326                          | NM_175551:501            | Dido1         | INSIDE                 | 0.623                                                        | 0.561                          | 2040.66            | 1144.36            | 0.349                          | 1441.47            | 503.53             |
| A_68_P28120310 | chr11:109583554-109583598                         | NM_153782:-6             | Fam20a        | PROMOTER               | 0.623                                                        | 0.464                          | 1323.81            | 613.60             | 0.289                          | 1052.51            | 303.71             |
| A_68_P21059051 | chr2:22478980-22479024                            | NM_008078:1156           | Gad2          | INSIDE                 | 0.623                                                        | 0.728                          | 2507.45            | 1824.41            | 0.453                          | 1952.96            | 885.11             |
| A_68_P24620284 | chr6:88140062-88140106                            | NM_008090:-8573          | Gata2         | PROMOTER               | 0.623                                                        | 0.709                          | 1936.62            | 1372.21            | 0.441                          | 1468.86            | 648.11             |
| A_68_P28888886 | chr13:24853737-24853781                           | NM_020567:48             | Gmnn          | INSIDE                 | 0.623                                                        | 0.652                          | 3986.32            | 2598.08            | 0.406                          | 3025.99            | 1229.46            |
| A_68_P31116575 | chr17:27610002-27610046                           | NM_001013385:30225       | Grm4          | INSIDE                 | 0.623                                                        | 4.118                          | 2069.05            | 8520.77            | 2.567                          | 1431.83            | 3675.22            |
| A_68_P28083512 | chr11:102993647-102993691                         | NM_001130516:-984        | Hexim2        | PROMOTER               | 0.623                                                        | 0.519                          | 1413.27            | 733.25             | 0.323                          | 1164.68            | 376.68             |
| A_68_P27390318 | chr10:99478125-99478169                           | NM_013598:-311           | Kitl          | PROMOTER               | 0.623                                                        | 0.632                          | 1060.59            | 670.45             | 0.394                          | 856.22             | 336.99             |
| A_68_P24929767 | chr6:146591034-146591078                          | NM_025315:-44            | Med21         | DIVERGENT_PROMOTER     | 0.623                                                        | 0.583                          | 1030.87            | 600.65             | 0.363                          | 804.04             | 292.07             |
| A_68_P22582958 | chr3:140874353-140874397                          | NM_008811:945            | Pdha2         | INSIDE                 | 0.623                                                        | 2.348                          | 2156.64            | 5063.04            | 1.462                          | 1808.41            | 2643.97            |
| A_68_P21110387 | chr2:31495883-31495927                            | NM_001123362:348         | Prdm12        | INSIDE                 | 0.623                                                        | 0.525                          | 1190.86            | 625.01             | 0.327                          | 996.20             | 325.67             |
| A_68_P22411525 | chr3:108059789-108059833                          | NM_011967:-33            | Pisma5        | PROMOTER               | 0.623                                                        | 0.488                          | 1245.34            | 607.81             | 0.304                          | 1061.12            | 322.83             |
| A_68_P20927662 | chr1:191552465-191552509                          | NM_008976:340            | Ptpn14        | INSIDE                 | 0.623                                                        | 0.503                          | 1091.33            | 548.52             | 0.313                          | 858.56             | 268.81             |
| A_68_P31120667 | chr17:28279215-28279259                           | NM_001004366:-234        | Scube3        | PROMOTER               | 0.623                                                        | 0.574                          | 2709.46            | 1553.88            | 0.357                          | 2254.63            | 804.92             |
| A_68_P28051297 | chr11:97413036-97413080                           | NM_018873:23382          | Srcin1        | INSIDE                 | 0.623                                                        | 0.633                          | 817.06             | 517.33             | 0.394                          | 635.78             | 250.71             |
| A_68_P31207576 | chr17:46692058-46692102                           | NM_020493:1031           | Srf           | INSIDE                 | 0.623                                                        | 0.725                          | 3690.55            | 2677.11            | 0.452                          | 2324.42            | 1050.17            |
| A_68_P28974165 | chr13:40824171-40824219                           | NM_001122948:1618        | Tcfap2a       | INSIDE                 | 0.623                                                        | 0.702                          | 1295.96            | 909.52             | 0.437                          | 1130.91            | 494.40             |

| ProbeName      | Target position of probe on CpG island microarray | TargetID           | GeneSymbol    | CpG island Description | Ratio of relative methylation (TiO <sub>2</sub> -NP/Vehicle) | Sham group                     |                    |                    | TiO <sub>2</sub> -H group      |                    |                    |
|----------------|---------------------------------------------------|--------------------|---------------|------------------------|--------------------------------------------------------------|--------------------------------|--------------------|--------------------|--------------------------------|--------------------|--------------------|
|                |                                                   |                    |               |                        |                                                              | Relative methylation (Cy5/Cy3) | Cy3 signal (Input) | Cy5 signal (MeDIP) | Relative methylation (Cy5/Cy3) | Cy3 signal (Input) | Cy5 signal (MeDIP) |
| A_68_P20620972 | chr1:134257371-134257415                          | NM_178874:30466    | Tmcc2         | INSIDE                 | 0.623                                                        | 3.221                          | 3614.04            | 11639.46           | 2.005                          | 2309.75            | 4632.10            |
| A_68_P20804420 | chr1:169238624-169238668                          | NM_001039483:-154  | Tmco1         | PROMOTER               | 0.623                                                        | 0.542                          | 1321.98            | 716.47             | 0.338                          | 1038.25            | 350.73             |
| A_68_P23111977 | chr4:93002257-93002301                            | NM_026954:-76      | Tusc1         | PROMOTER               | 0.623                                                        | 0.432                          | 1974.38            | 853.07             | 0.269                          | 1522.63            | 410.16             |
| A_68_P23590585 | chr5:34037821-34037865                            | AK172441:87544     |               | INSIDE                 | 0.623                                                        | 0.598                          | 1576.61            | 942.50             | 0.373                          | 1240.98            | 462.38             |
| A_68_P21113214 | chr2:31939681-31939725                            | NM_175511:-477     | Fam78a        | PROMOTER               | 0.622                                                        | 0.593                          | 1617.40            | 959.38             | 0.369                          | 1278.06            | 471.64             |
| A_68_P29145567 | chr13:74454737-74454781                           | NM_011051:16       | Pdcd6         | INSIDE                 | 0.622                                                        | 0.375                          | 1578.31            | 592.15             | 0.233                          | 1210.49            | 282.42             |
| A_68_P30513991 | chr16:5132312-5132356                             | NM_008909:240      | Ppl           | INSIDE                 | 0.622                                                        | 0.653                          | 5131.29            | 3349.38            | 0.406                          | 3921.83            | 1592.24            |
| A_68_P21721814 | chr2:146838725-146838769                          | NM_011917:-49      | Xrm2          | PROMOTER               | 0.622                                                        | 0.549                          | 1238.50            | 679.61             | 0.342                          | 930.84             | 317.94             |
| A_68_P21334161 | chr2:73730794-73730838                            | NM_001025093:-131  | Atf2          | PROMOTER               | 0.621                                                        | 0.592                          | 1565.67            | 927.41             | 0.368                          | 1036.41            | 381.19             |
| A_68_P22393605 | chr3:104667362-104667406                          | NM_009797:39       | Capza1        | INSIDE                 | 0.621                                                        | 0.739                          | 2537.34            | 1875.67            | 0.459                          | 2024.34            | 928.75             |
| A_68_P27262972 | chr10:76059240-76059284                           | NM_146007:26887    | Col6a2        | INSIDE                 | 0.621                                                        | 2.423                          | 1159.92            | 2810.02            | 1.504                          | 990.29             | 1489.82            |
| A_68_P24816932 | chr6:124719430-124719474                          | NM_013509:75       | Eno2          | INSIDE                 | 0.621                                                        | 0.617                          | 3958.17            | 2442.02            | 0.383                          | 2813.88            | 1078.75            |
| A_68_P23795929 | chr5:73524595-73524639                            | NM_028194:123241   | Fryl          | INSIDE                 | 0.621                                                        | 2.907                          | 717.25             | 2084.89            | 1.804                          | 617.36             | 1113.74            |
| A_68_P27286342 | chr10:80380790-80380834                           | NM_010722:178      | Lmnb2         | INSIDE                 | 0.621                                                        | 0.559                          | 1287.32            | 720.17             | 0.347                          | 1064.87            | 369.65             |
| A_68_P23439841 | chr4:155027081-155027125                          | NM_011985:391      | Mmp23         | INSIDE                 | 0.621                                                        | 0.721                          | 3407.25            | 2456.30            | 0.448                          | 2512.20            | 1125.54            |
| A_68_P22129477 | chr3:51212635-51212679                            | NM_025523:221      | Ndufc1        | INSIDE                 | 0.621                                                        | 0.612                          | 1563.98            | 957.33             | 0.380                          | 1247.67            | 473.94             |
| A_68_P28265956 | chr12:16660397-16660441                           | NM_008747:143      | Ntstr2        | INSIDE                 | 0.621                                                        | 0.465                          | 1150.11            | 535.29             | 0.289                          | 961.02             | 277.93             |
| A_68_P23593807 | chr5:34678844-34678888                            | NM_011278:-172     | Rnf4          | PROMOTER               | 0.621                                                        | 0.616                          | 1394.05            | 859.07             | 0.383                          | 1193.81            | 457.20             |
| A_68_P24176374 | chr5:148706152-148706196                          | NM_027872:204      | Slc46a3       | INSIDE                 | 0.621                                                        | 0.561                          | 1055.09            | 592.00             | 0.349                          | 888.81             | 309.76             |
| A_68_P31677780 | chr18:46757146-46757190                           | NM_025698:21       | Tmed7         | INSIDE                 | 0.621                                                        | 0.524                          | 1358.72            | 712.29             | 0.325                          | 1254.78            | 408.22             |
| A_68_P32217661 | chr19:59241208-59241252                           | NM_009501:3289     | Vax1          | INSIDE                 | 0.621                                                        | 0.630                          | 866.15             | 545.71             | 0.391                          | 762.10             | 298.23             |
| A_68_P29019863 | chr13:48608843-48608887                           | NM_001164576:-59   | Zfp169        | PROMOTER               | 0.621                                                        | 0.678                          | 1016.38            | 688.98             | 0.421                          | 884.39             | 372.36             |
| A_68_P30150545 | chr15:38591758-38591802                           | NM_025494:122      | Atp6v1c1      | INSIDE                 | 0.620                                                        | 0.584                          | 1683.06            | 983.12             | 0.362                          | 1387.33            | 502.20             |
| A_68_P28419969 | chr12:50486658-50486702                           | NM_008241:2687     | Foxg1         | INSIDE                 | 0.620                                                        | 0.691                          | 2377.01            | 1642.31            | 0.428                          | 1716.69            | 735.02             |
| A_68_P24501230 | chr6:63206331-63206375                            | NM_008167:-498     | Grid2         | PROMOTER               | 0.620                                                        | 0.455                          | 1381.44            | 628.56             | 0.282                          | 1105.87            | 311.82             |
| A_68_P31849647 | chr18:78006501-78006545                           | NM_146089:-3       | Haus1         | DIVERGENT_PROMOTER     | 0.620                                                        | 0.536                          | 1708.20            | 915.30             | 0.332                          | 1483.02            | 493.02             |
| A_68_P24449040 | chr6:52154168-52154212                            | NM_010453:396      | Hoxa5         | INSIDE                 | 0.620                                                        | 0.622                          | 3048.81            | 1897.39            | 0.386                          | 2375.59            | 915.95             |
| A_68_P27284101 | chr10:80040251-80040295                           | NM_078477:-231     | Klf16         | PROMOTER               | 0.620                                                        | 0.532                          | 2891.93            | 1539.90            | 0.330                          | 2218.23            | 732.89             |
| A_68_P27500772 | chr10:120415468-120415512                         | NM_001081193:896   | Lemd3         | INSIDE                 | 0.620                                                        | 0.574                          | 977.29             | 561.25             | 0.356                          | 794.67             | 282.79             |
| A_68_P32226999 | chr19:60832637-60832681                           | NM_178421:769      | Nanos1        | INSIDE                 | 0.620                                                        | 0.686                          | 1576.41            | 1081.76            | 0.425                          | 1332.58            | 566.66             |
| A_68_P27131118 | chr10:50615055-50615099                           | NM_011376:-380     | Sim1          | PROMOTER               | 0.620                                                        | 0.677                          | 1119.43            | 757.96             | 0.419                          | 930.01             | 390.13             |
| A_68_P28957974 | chr13:38085985-38086029                           | NM_025965:53       | Ssr1          | INSIDE                 | 0.620                                                        | 0.464                          | 1318.20            | 611.17             | 0.287                          | 1236.17            | 355.27             |
| A_68_P27693350 | chr11:33102180-33102224                           | NM_019916:1386     | Tlx3          | INSIDE                 | 0.620                                                        | 2.714                          | 6440.35            | 17478.25           | 1.684                          | 4142.87            | 6974.99            |
| A_68_P31406131 | chr17:85075545-85075589                           | NM_031884:6697     | Abeg5         | INSIDE                 | 0.619                                                        | 0.430                          | 1248.70            | 537.12             | 0.266                          | 968.77             | 257.85             |
| A_68_P31599403 | chr18:31919740-31919784                           | NM_153515:229      | Ammecr11      | INSIDE                 | 0.619                                                        | 0.683                          | 1004.46            | 686.51             | 0.423                          | 796.59             | 337.11             |
| A_68_P30371905 | chr15:80202995-80203040                           | NM_001044308:85350 | Caena1i       | INSIDE                 | 0.619                                                        | 6.483                          | 113.92             | 738.50             | 4.011                          | 142.16             | 570.23             |
| A_68_P27495202 | chr10:119526727-119526771                         | NM_080446:23273    | Helb          | INSIDE                 | 0.619                                                        | 2.400                          | 1052.84            | 2526.84            | 1.486                          | 871.14             | 1294.48            |
| A_68_P27497203 | chr10:119851890-119851938                         | NM_010441:62077    | Hmga2         | INSIDE                 | 0.619                                                        | 3.041                          | 1188.53            | 3614.42            | 1.883                          | 922.28             | 1736.95            |
| A_68_P21345222 | chr2:75497220-75497264                            | NM_053263:-73      | Hnrpa3        | PROMOTER               | 0.619                                                        | 0.489                          | 1143.12            | 558.50             | 0.302                          | 996.67             | 301.31             |
| A_68_P20240341 | chr1:55144942-55144986                            | NM_008303:-27      | Hspe1         | DIVERGENT_PROMOTER     | 0.619                                                        | 0.470                          | 1872.90            | 879.42             | 0.291                          | 1633.71            | 475.15             |
| A_68_P28041914 | chr11:95866847-95866891                           | NM_009951:390      | Igf2bp1       | INSIDE                 | 0.619                                                        | 0.704                          | 1657.30            | 1166.79            | 0.436                          | 1324.37            | 577.04             |
| A_68_P25187998 | chr7:73533035-73533079                            | NM_146191:171      | Lrrk1         | INSIDE                 | 0.619                                                        | 0.453                          | 2351.17            | 1064.01            | 0.280                          | 2026.61            | 567.49             |
| A_68_P31556681 | chr18:23910710-23910754                           | NM_001162942:-101  | Mapre2        | PROMOTER               | 0.619                                                        | 0.570                          | 1000.45            | 570.56             | 0.353                          | 907.80             | 320.23             |
| A_68_P27695167 | chr11:33413838-33413882                           | NM_023146:-114     | Ranbp17       | PROMOTER               | 0.619                                                        | 0.547                          | 1762.37            | 964.25             | 0.339                          | 1472.20            | 498.76             |
| A_68_P21612305 | chr2:127073731-127073775                          | NM_175145:42       | Tmem127       | INSIDE                 | 0.619                                                        | 0.476                          | 1722.70            | 819.82             | 0.295                          | 1265.67            | 372.99             |
| A_68_P24624900 | chr6:88852416-88852460                            | NM_011906:194      | Tpra1         | INSIDE                 | 0.619                                                        | 0.412                          | 1630.70            | 672.01             | 0.255                          | 1328.12            | 338.55             |
| A_68_P25507823 | chr7:135019837-135019881                          | NM_146259:479      | Zfp668        | INSIDE                 | 0.619                                                        | 0.639                          | 1201.88            | 768.49             | 0.396                          | 966.17             | 382.61             |
| A_68_P24631971 | chr6:90320525-90320569                            | NM_030260:1059     | Zxdc          | INSIDE                 | 0.619                                                        | 0.692                          | 1515.49            | 1048.08            | 0.428                          | 1144.78            | 489.68             |
| A_68_P30351330 | chr15:76779157-76779201                           | NM_054099:205      | 1110038F14Rik | INSIDE                 | 0.618                                                        | 0.466                          | 1212.67            | 565.59             | 0.288                          | 1047.35            | 301.82             |
| A_68_P26234306 | chr8:125100834-125100878                          | NM_009698:-49      | Aprt          | PROMOTER               | 0.618                                                        | 2.571                          | 9686.04            | 24899.64           | 1.589                          | 6517.89            | 10354.67           |
| A_68_P27188615 | chr10:62411987-62412031                           | NM_177372:2232     | Dna2          | INSIDE                 | 0.618                                                        | 2.596                          | 910.51             | 2363.28            | 1.605                          | 760.06             | 1220.14            |

| ProbeName      | Target position of probe on CpG island microarray | TargetID                | GeneSymbol    | CpG island Description | Ratio of relative methylation (TiO <sub>2</sub> -NP/Vehicle) | Sham group                     |                    |                    | TiO <sub>2</sub> -H group      |                    |                    |
|----------------|---------------------------------------------------|-------------------------|---------------|------------------------|--------------------------------------------------------------|--------------------------------|--------------------|--------------------|--------------------------------|--------------------|--------------------|
|                |                                                   |                         |               |                        |                                                              | Relative methylation (Cy5/Cy3) | Cy3 signal (Input) | Cy5 signal (MeDIP) | Relative methylation (Cy5/Cy3) | Cy3 signal (Input) | Cy5 signal (MeDIP) |
| A_68_P26025443 | chr8:88079254-88079298                            | NM_019794:-106          | Dnaja2        | PROMOTER               | 0.618                                                        | 0.555                          | 1859.01            | 1031.32            | 0.343                          | 1720.93            | 590.43             |
| A_68_P24952006 | chr7:5032174-5032218                              | NM_010147:290           | Epn1          | INSIDE                 | 0.618                                                        | 0.674                          | 1203.37            | 811.37             | 0.417                          | 1007.89            | 419.94             |
| A_68_P21221946 | chr2:52717355-52717399                            | NM_172409:475           | Fmn12         | INSIDE                 | 0.618                                                        | 0.490                          | 2710.32            | 1329.41            | 0.303                          | 2104.41            | 638.12             |
| A_68_P25661163 | chr8:12385271-12385315                            | NR_027975:-478          | Gm5607        | PROMOTER               | 0.618                                                        | 0.694                          | 1255.05            | 870.74             | 0.429                          | 981.76             | 420.97             |
| A_68_P24111875 | chr5:134660308-134660352                          | NM_053266:423           | Gtf2ird2      | INSIDE                 | 0.618                                                        | 0.494                          | 2700.07            | 1333.23            | 0.305                          | 2069.94            | 631.95             |
| A_68_P26021786 | chr8:87295957-87296001                            | NM_001081981:2290       | Nfix          | INSIDE                 | 0.618                                                        | 0.439                          | 1489.51            | 653.41             | 0.271                          | 1071.33            | 290.47             |
| A_68_P20335742 | chr1:72301442-72301486                            | NM_023523:29424         | Pecr          | DOWNSTREAM             | 0.618                                                        | 0.387                          | 2902.68            | 1123.65            | 0.239                          | 2134.24            | 510.80             |
| A_68_P25115500 | chr7:57167143-57167187                            | NM_148931:95            | Slec6a5       | INSIDE                 | 0.618                                                        | 0.599                          | 1270.30            | 760.81             | 0.370                          | 959.40             | 355.32             |
| A_68_P22336402 | chr3:93248746-93248790                            | NM_001163098:2517       | Tchh          | INSIDE                 | 0.618                                                        | 0.715                          | 1596.61            | 1141.44            | 0.442                          | 1243.86            | 549.45             |
| A_68_P24542638 | chr6:72566666-72566710                            | NM_009444:54            | Tgolin2       | INSIDE                 | 0.618                                                        | 0.711                          | 2406.13            | 1709.67            | 0.439                          | 1943.97            | 854.01             |
| A_68_P31926780 | chr19:5082631-5082675                             | NM_001001885:2825       | Tmem151a      | INSIDE                 | 0.618                                                        | 2.379                          | 950.57             | 2261.20            | 1.469                          | 759.18             | 1115.50            |
| A_68_P26644654 | chr9:75406902-75406946                            | NM_016963:540           | Tmod3         | INSIDE                 | 0.618                                                        | 0.550                          | 1637.02            | 900.32             | 0.340                          | 1383.47            | 469.90             |
| A_68_P25508614 | chr7:135153815-135153862                          | NM_001079932:5947       | Trim72        | INSIDE                 | 0.618                                                        | 2.597                          | 1699.77            | 4413.51            | 1.604                          | 1251.21            | 2007.20            |
| A_68_P22948240 | chr4:57968866-57968910                            | NM_011660:395           | Txn1          | INSIDE                 | 0.618                                                        | 0.562                          | 1046.69            | 588.20             | 0.347                          | 910.36             | 316.27             |
| A_68_P32117276 | chr19:41876224-41876268                           | NM_001163495:328        | Arhgap19      | INSIDE                 | 0.617                                                        | 0.495                          | 1654.12            | 818.59             | 0.305                          | 1309.43            | 399.97             |
| A_68_P24118896 | chr5:136470915-136470959                          | NM_023742:190           | Dtx2          | INSIDE                 | 0.617                                                        | 0.645                          | 2522.89            | 1627.48            | 0.398                          | 2062.38            | 821.34             |
| A_68_P24112568 | chr5:134790208-134790252                          | NM_001080746:386        | Gtf2i         | INSIDE                 | 0.617                                                        | 0.617                          | 2532.59            | 1563.75            | 0.381                          | 2013.74            | 767.02             |
| A_68_P25965604 | chr8:75876534-75876578                            | NM_010687:-101          | Large         | PROMOTER               | 0.617                                                        | 0.495                          | 1383.28            | 684.59             | 0.306                          | 1184.68            | 361.93             |
| A_68_P31734234 | chr18:57292707-57292751                           | NM_001001979:-15        | Megf10        | PROMOTER               | 0.617                                                        | 0.485                          | 1416.03            | 687.00             | 0.299                          | 1027.76            | 307.71             |
| A_68_P30722301 | chr16:44558812-44558856                           | NR_037242:-592          | Mir3081       | PROMOTER               | 0.617                                                        | 0.662                          | 1582.35            | 1046.83            | 0.408                          | 1317.74            | 538.01             |
| A_68_P22312503 | chr3:88018770-88018821                            | NR_037276:-297          | Mir3093       | PROMOTER               | 0.617                                                        | 0.495                          | 1146.59            | 567.86             | 0.306                          | 811.73             | 248.22             |
| A_68_P22898164 | chr4:48058319-48058363                            | NM_015743:-5779         | Nr4a3         | PROMOTER               | 0.617                                                        | 0.558                          | 2232.91            | 1246.65            | 0.345                          | 1848.83            | 637.15             |
| A_68_P26142833 | chr8:109572050-109572094                          | NM_026513:442           | Pdf           | INSIDE                 | 0.617                                                        | 0.486                          | 1244.49            | 605.28             | 0.300                          | 975.92             | 293.09             |
| A_68_P27282239 | chr10:79755107-79755151                           | NM_009091:-47           | Rps15         | PROMOTER               | 0.617                                                        | 0.562                          | 1324.96            | 744.01             | 0.346                          | 943.82             | 326.75             |
| A_68_P31934219 | chr19:6363498-6363542                             | NM_001110791:-169       | Srf1          | PROMOTER               | 0.617                                                        | 0.631                          | 1450.81            | 916.02             | 0.389                          | 1059.31            | 412.36             |
| A_68_P22872187 | chr4:43536672-43536716                            | NM_009416:-434          | Tpm2          | PROMOTER               | 0.617                                                        | 0.497                          | 1160.65            | 576.55             | 0.306                          | 917.73             | 281.16             |
| A_68_P27056228 | chr10:34017531-34017575                           | NM_030203:326           | Tspyl4        | INSIDE                 | 0.617                                                        | 0.630                          | 1544.81            | 972.47             | 0.388                          | 1238.09            | 480.83             |
| A_68_P20349425 | chr1:74634360-74634404                            | NM_029888:220           | Zfp142        | INSIDE                 | 0.617                                                        | 0.449                          | 2720.49            | 1222.32            | 0.277                          | 2035.70            | 564.19             |
| A_68_P30499469 | chr15:102568057-102568101                         |                         |               | Unknown                | 0.617                                                        | 2.888                          | 2183.69            | 6306.93            | 1.781                          | 1649.54            | 2938.28            |
| A_68_P21840498 | chr2:168107179-168107224                          | ENSMUST00000109191:-569 |               | PROMOTER               | 0.617                                                        | 0.437                          | 2202.02            | 962.78             | 0.270                          | 1665.42            | 448.93             |
| A_68_P30261323 | chr15:60655040-60655084                           | NR_030696:543           | 9930014A18Rik | INSIDE                 | 0.616                                                        | 0.454                          | 1534.45            | 696.58             | 0.280                          | 1241.21            | 347.00             |
| A_68_P27285631 | chr10:80270128-80270172                           | NM_007445:2158          | Amh           | INSIDE                 | 0.616                                                        | 0.443                          | 1418.57            | 628.69             | 0.273                          | 984.36             | 268.53             |
| A_68_P26595469 | chr9:66682493-66682537                            | NM_026674:-1            | Aph1c         | PROMOTER               | 0.616                                                        | 0.722                          | 1603.34            | 1157.12            | 0.445                          | 1297.80            | 577.33             |
| A_68_P23155610 | chr4:101223010-101223054                          | NM_001164583:-166       | Dnajc6        | PROMOTER               | 0.616                                                        | 0.725                          | 2314.37            | 1677.70            | 0.447                          | 1849.94            | 826.56             |
| A_68_P24979593 | chr7:16684397-16684441                            | NM_025898:427           | Napa          | INSIDE                 | 0.616                                                        | 0.536                          | 1795.96            | 962.56             | 0.330                          | 1447.41            | 477.97             |
| A_68_P20740066 | chr1:157659774-157659818                          | NM_001024945:233        | Qsox1         | INSIDE                 | 0.616                                                        | 0.630                          | 2087.28            | 1315.94            | 0.389                          | 1556.18            | 604.64             |
| A_68_P21867064 | chr2:172826009-172826053                          | NM_175112:413           | Rac1          | INSIDE                 | 0.616                                                        | 0.612                          | 1108.55            | 678.63             | 0.377                          | 967.90             | 365.17             |
| A_68_P26748151 | chr9:96531280-96531324                            | NM_053268:620           | Rasa2         | INSIDE                 | 0.616                                                        | 0.558                          | 2267.55            | 1265.27            | 0.344                          | 2134.17            | 733.36             |
| A_68_P21815998 | chr2:163900092-163900136                          | NM_021420:201           | Stk4          | INSIDE                 | 0.616                                                        | 0.425                          | 1468.72            | 623.74             | 0.262                          | 1215.31            | 317.93             |
| A_68_P25949499 | chr8:72567227-72567271                            | NM_027481:537           | Supp1         | INSIDE                 | 0.616                                                        | 0.530                          | 1543.33            | 817.97             | 0.327                          | 1335.24            | 436.21             |
| A_68_P31260843 | chr17:57415026-57415070                           | NM_001163815:-3474      | Vav1          | PROMOTER               | 0.616                                                        | 0.575                          | 2460.19            | 1414.40            | 0.354                          | 2166.22            | 766.78             |
| A_68_P20319174 | chr1:69424426-69424470                            |                         |               | Unknown                | 0.616                                                        | 2.741                          | 506.66             | 1388.83            | 1.689                          | 515.58             | 870.68             |
| A_68_P28153161 | chr11:115243333-115243378                         | NM_001080929:126        | Cdr2l         | INSIDE                 | 0.615                                                        | 0.703                          | 1343.15            | 943.86             | 0.432                          | 1293.34            | 558.71             |
| A_68_P31193443 | chr17:44325522-44325566                           | NM_172621:24            | Clic5         | INSIDE                 | 0.615                                                        | 0.487                          | 1461.95            | 711.75             | 0.299                          | 1172.02            | 350.96             |
| A_68_P26081252 | chr8:97605501-97605545                            | NM_028805:422           | Katnb1        | INSIDE                 | 0.615                                                        | 2.298                          | 1639.11            | 3766.25            | 1.412                          | 1072.01            | 1513.75            |
| A_68_P27509909 | chr10:122116007-122116051                         | NM_176919:211           | Ppm1h         | INSIDE                 | 0.615                                                        | 0.681                          | 1353.95            | 922.59             | 0.419                          | 1184.77            | 496.89             |
| A_68_P26347006 | chr9:21216708-21216752                            | NM_021888:450           | Qrt1          | INSIDE                 | 0.615                                                        | 0.495                          | 1285.34            | 636.11             | 0.304                          | 1167.96            | 355.36             |
| A_68_P28580849 | chr12:82433588-82433632                           | NM_001167920:557        | Sle8a3        | INSIDE                 | 0.615                                                        | 0.666                          | 997.56             | 663.93             | 0.410                          | 772.99             | 316.54             |
| A_68_P20005798 | chr1:4482441-4482485                              | NM_011441:4032          | Sox17         | INSIDE                 | 0.615                                                        | 0.428                          | 1368.50            | 585.40             | 0.263                          | 1140.95            | 300.06             |
| A_68_P26447525 | chr9:40965613-40965657                            | NM_176860:-57           | Ubash3b       | PROMOTER               | 0.615                                                        | 0.411                          | 1287.73            | 529.80             | 0.253                          | 1161.68            | 293.92             |
| A_68_P22362401 | chr3:98945093-98945137                            | NM_027462:102           | Wars2         | INSIDE                 | 0.615                                                        | 0.591                          | 1894.53            | 1120.60            | 0.363                          | 1479.21            | 537.67             |

| ProbeName      | Target position of probe on CpG island microarray | TargetID               | GeneSymbol    | CpG island Description | Ratio of relative methylation (TiO <sub>2</sub> -NP/Vehicle) | Sham group                     |                    |                    | TiO <sub>2</sub> -H group      |                    |                    |
|----------------|---------------------------------------------------|------------------------|---------------|------------------------|--------------------------------------------------------------|--------------------------------|--------------------|--------------------|--------------------------------|--------------------|--------------------|
|                |                                                   |                        |               |                        |                                                              | Relative methylation (Cy5/Cy3) | Cy3 signal (Input) | Cy5 signal (MeDIP) | Relative methylation (Cy5/Cy3) | Cy3 signal (Input) | Cy5 signal (MeDIP) |
| A_68_P28040434 | chr1:95573914-95573958                            | ENSMUST00000107717:-50 |               | PROMOTER               | 0.615                                                        | 0.609                          | 1551.86            | 944.87             | 0.374                          | 1341.55            | 502.26             |
| A_68_P26892247 | chr9:122859927-122859971                          | NM_025419:170          | 1110059G10Rik | INSIDE                 | 0.614                                                        | 0.597                          | 1193.62            | 712.33             | 0.366                          | 952.22             | 348.99             |
| A_68_P23293015 | chr4:128444743-128444787                          | NM_001009819:8263      | A3gal2        | INSIDE                 | 0.614                                                        | 2.437                          | 1056.13            | 2573.32            | 1.495                          | 898.87             | 1343.67            |
| A_68_P31939559 | chr19:7457501-7457545                             | NM_001033139:-6        | A1846148      | PROMOTER               | 0.614                                                        | 0.510                          | 1834.51            | 936.50             | 0.313                          | 1487.51            | 466.18             |
| A_68_P24039813 | chr5:121063452-121063497                          | NM_028041:336          | Ddx54         | INSIDE                 | 0.614                                                        | 0.453                          | 1291.47            | 584.56             | 0.278                          | 994.37             | 276.44             |
| A_68_P30083648 | chr15:25772800-25772844                           | NM_001034851:-196      | Fam134b       | PROMOTER               | 0.614                                                        | 0.680                          | 2093.85            | 1424.58            | 0.418                          | 1793.37            | 748.82             |
| A_68_P27543728 | chr10:128328158-128328202                         | NM_010272:594          | Gdf11         | INSIDE                 | 0.614                                                        | 0.713                          | 2342.09            | 1668.76            | 0.437                          | 1895.11            | 828.69             |
| A_68_P28055838 | chr11:98210489-98210533                           | NM_144828:459          | Ppp1r1b       | INSIDE                 | 0.614                                                        | 0.536                          | 3461.83            | 1855.57            | 0.329                          | 2814.69            | 926.37             |
| A_68_P22488130 | chr3:123149844-123149888                          | NM_008939:36           | Prss12        | INSIDE                 | 0.614                                                        | 0.572                          | 1247.95            | 713.78             | 0.351                          | 1075.79            | 377.71             |
| A_68_P23402407 | chr4:149147586-149147630                          | NM_027460:768          | Slc25a33      | INSIDE                 | 0.614                                                        | 0.586                          | 1141.88            | 668.64             | 0.360                          | 946.72             | 340.62             |
| A_68_P30499547 | chr15:102577888-102577932                         |                        |               | Unknown                | 0.614                                                        | 0.568                          | 1922.29            | 1091.84            | 0.349                          | 1531.94            | 534.65             |
| A_68_P23601494 | chr5:35917751-35917795                            | NM_030208:-53          | 2310079F23Rik | DIVERGENT_PROMOTER     | 0.613                                                        | 0.579                          | 1261.35            | 730.68             | 0.355                          | 978.75             | 347.82             |
| A_68_P30462697 | chr15:96118805-96118849                           | NM_175251:874          | Arid2         | INSIDE                 | 0.613                                                        | 2.922                          | 759.14             | 2218.15            | 1.792                          | 653.35             | 1170.67            |
| A_68_P29265994 | chr13:100670562-100670606                         | NM_001081493:54        | Cartpt        | INSIDE                 | 0.613                                                        | 0.490                          | 1785.71            | 874.59             | 0.300                          | 1439.31            | 432.37             |
| A_68_P27894312 | chr11:69137170-69137214                           | NM_172560:183          | Cntrob        | INSIDE                 | 0.613                                                        | 0.477                          | 1808.54            | 863.43             | 0.293                          | 1303.35            | 381.55             |
| A_68_P21102914 | chr2:30247811-30247855                            | NM_020329:-103         | Dolpp1        | PROMOTER               | 0.613                                                        | 0.489                          | 4399.74            | 2149.48            | 0.299                          | 3276.44            | 981.06             |
| A_68_P21007903 | chr2:11698976-11699020                            | NM_015792:156          | Fbxo18        | INSIDE                 | 0.613                                                        | 0.626                          | 3801.92            | 2380.95            | 0.384                          | 2789.82            | 1071.73            |
| A_68_P20170820 | chr1:40382866-40382910                            | NM_133193:1417         | Il1rl2        | INSIDE                 | 0.613                                                        | 0.599                          | 1729.41            | 1035.11            | 0.367                          | 1317.23            | 483.15             |
| A_68_P28155559 | chr11:115685801-115685845                         | NM_145438:451          | Ligl2         | INSIDE                 | 0.613                                                        | 0.546                          | 2563.04            | 1399.14            | 0.334                          | 1948.82            | 651.73             |
| A_68_P20185543 | chr1:42908342-42908386                            | NM_023514:287          | Mrps9         | INSIDE                 | 0.613                                                        | 0.465                          | 1569.81            | 729.99             | 0.285                          | 1272.81            | 363.00             |
| A_68_P29453027 | chr14:22319300-22319344                           | NM_017479:316          | Myst4         | INSIDE                 | 0.613                                                        | 0.706                          | 2117.96            | 1496.31            | 0.433                          | 1647.68            | 713.30             |
| A_68_P30344676 | chr15:75714693-75714737                           | NM_172607:10197        | Naprt1        | DOWNSTREAM             | 0.613                                                        | 0.702                          | 1537.91            | 1080.22            | 0.431                          | 1142.02            | 491.74             |
| A_68_P22006131 | chr3:26230237-26230281                            | NM_138666:573          | Nlgn1         | INSIDE                 | 0.613                                                        | 0.426                          | 1343.22            | 571.62             | 0.261                          | 998.03             | 260.19             |
| A_68_P26742504 | chr9:95461303-95461354                            | NM_198414:1093         | Paqr9         | INSIDE                 | 0.613                                                        | 2.623                          | 1333.75            | 3498.63            | 1.608                          | 977.47             | 1572.11            |
| A_68_P20184674 | chr1:42754743-42754787                            | NM_008900:774          | Pou3f3        | INSIDE                 | 0.613                                                        | 0.631                          | 1701.20            | 1073.53            | 0.387                          | 1494.22            | 578.41             |
| A_68_P27631990 | chr11:20443463-20443507                           | NM_021372:229          | Sertad2       | INSIDE                 | 0.613                                                        | 0.689                          | 1889.90            | 1302.35            | 0.422                          | 1447.47            | 611.00             |
| A_68_P23243656 | chr4:118781563-118781607                          | NM_011400:235          | Ste2a1        | INSIDE                 | 0.613                                                        | 0.601                          | 1382.72            | 830.48             | 0.368                          | 1175.39            | 432.70             |
| A_68_P26924750 | chr10:8238430-8238474                             | NM_177387:171          | Ust           | INSIDE                 | 0.613                                                        | 0.633                          | 1249.79            | 791.26             | 0.388                          | 1122.33            | 435.37             |
| A_68_P26872302 | chr9:119336590-119336634                          | NM_007397:24994        | Acvr2b        | INSIDE                 | 0.612                                                        | 2.514                          | 1913.37            | 4810.10            | 1.537                          | 1406.02            | 2161.67            |
| A_68_P26399345 | chr9:31019701-31019745                            | NM_001102455:-322      | Aplp2         | PROMOTER               | 0.612                                                        | 0.534                          | 1052.03            | 561.48             | 0.327                          | 829.63             | 271.20             |
| A_68_P30567432 | chr16:15887571-15887615                           | NM_007679:214          | Cebpd         | INSIDE                 | 0.612                                                        | 0.562                          | 3420.96            | 1921.32            | 0.344                          | 2518.76            | 865.88             |
| A_68_P22046077 | chr3:33979970-33980014                            | NM_00102621:1:256      | Dnajc19       | INSIDE                 | 0.612                                                        | 0.558                          | 1122.87            | 626.97             | 0.342                          | 729.58             | 249.15             |
| A_68_P23796634 | chr5:73647594-73647638                            | NM_028194:241          | Fryl          | INSIDE                 | 0.612                                                        | 0.645                          | 854.45             | 551.52             | 0.395                          | 702.24             | 277.44             |
| A_68_P31978254 | chr19:16207846-16207890                           | NM_008139:548          | Gnaq          | INSIDE                 | 0.612                                                        | 0.495                          | 1558.38            | 771.01             | 0.303                          | 1272.35            | 385.25             |
| A_68_P26811671 | chr9:107804092-107804136                          | NM_028369:13655        | Mon1a         | INSIDE                 | 0.612                                                        | 0.601                          | 994.45             | 597.82             | 0.368                          | 768.57             | 282.58             |
| A_68_P21821252 | chr2:164859772-164859816                          | NM_144892:485          | Ncoa5         | INSIDE                 | 0.612                                                        | 0.593                          | 930.67             | 552.14             | 0.363                          | 804.09             | 291.83             |
| A_68_P22771642 | chr4:20705490-20705534                            | NM_172987:303          | Nkain3        | INSIDE                 | 0.612                                                        | 0.652                          | 1130.86            | 737.18             | 0.399                          | 956.36             | 381.83             |
| A_68_P26129290 | chr8:107115528-107115572                          | NM_001024606:183       | Pdp2          | INSIDE                 | 0.612                                                        | 0.632                          | 3062.32            | 1936.90            | 0.387                          | 2437.09            | 943.68             |
| A_68_P20632580 | chr1:136195843-136195887                          | NM_001144855:33641     | Ppfia4        | INSIDE                 | 0.612                                                        | 0.668                          | 1158.23            | 773.15             | 0.409                          | 951.89             | 388.86             |
| A_68_P26136326 | chr8:108379372-108379416                          | NM_021513:392          | Thap11        | INSIDE                 | 0.612                                                        | 0.724                          | 1593.83            | 1153.63            | 0.443                          | 1325.04            | 586.55             |
| A_68_P21736743 | chr2:149656066-149656110                          | NM_001085521:-430      | Tmem90b       | PROMOTER               | 0.612                                                        | 0.634                          | 1383.81            | 877.21             | 0.388                          | 1006.57            | 390.19             |
| A_68_P21568807 | chr2:119114429-119114473                          | NM_172269:-27          | Vps18         | PROMOTER               | 0.612                                                        | 0.443                          | 1270.63            | 562.46             | 0.271                          | 882.92             | 239.10             |
| A_68_P21221053 | chr2:52531826-52531870                            | NM_001037099:253       | Caenb4        | INSIDE                 | 0.611                                                        | 0.486                          | 1392.83            | 676.68             | 0.297                          | 1086.75            | 322.45             |
| A_68_P31156008 | chr17:34974068-34974113                           | NM_001163770:127       | Dom3z         | INSIDE                 | 0.611                                                        | 0.503                          | 1152.02            | 579.63             | 0.307                          | 772.23             | 237.39             |
| A_68_P24141307 | chr5:140894611-140894655                          | NM_133916:-626         | Eif3b         | PROMOTER               | 0.611                                                        | 0.418                          | 1644.66            | 687.41             | 0.256                          | 1499.27            | 383.16             |
| A_68_P29150850 | chr13:75845171-75845215                           | NM_138953:261          | Eil2          | INSIDE                 | 0.611                                                        | 0.560                          | 2148.41            | 1202.57            | 0.342                          | 1824.14            | 623.46             |
| A_68_P28118149 | chr11:109224381-109224425                         | NM_010303:295          | Gna13         | INSIDE                 | 0.611                                                        | 0.521                          | 1186.78            | 618.62             | 0.318                          | 840.02             | 267.48             |
| A_68_P30501636 | chr15:102866066-102866110                         | NM_013553:1263         | Hoxc4         | INSIDE                 | 0.611                                                        | 0.709                          | 2052.98            | 1455.93            | 0.433                          | 1530.93            | 663.51             |
| A_68_P27865436 | chr11:64248735-64248779                           | NM_178870:-77          | Hs3st3a1      | PROMOTER               | 0.611                                                        | 0.517                          | 1450.49            | 750.17             | 0.316                          | 1056.21            | 333.60             |
| A_68_P29130721 | chr13:72100670-72100714                           | NM_010573:479          | Irx1          | INSIDE                 | 0.611                                                        | 0.650                          | 1830.69            | 1189.90            | 0.397                          | 1628.53            | 647.06             |
| A_68_P31253054 | chr17:56109780-56109824                           | NM_001159523:-102      | Shd           | PROMOTER               | 0.611                                                        | 0.544                          | 2327.83            | 1266.72            | 0.333                          | 1596.29            | 530.99             |

| ProbeName      | Target position of probe on CpG island microarray | TargetID                | GeneSymbol    | CpG island Description | Ratio of relative methylation (TiO <sub>2</sub> -NP/Vehicle) | Sham group                     |                    |                    | TiO <sub>2</sub> -H group      |                    |                    |
|----------------|---------------------------------------------------|-------------------------|---------------|------------------------|--------------------------------------------------------------|--------------------------------|--------------------|--------------------|--------------------------------|--------------------|--------------------|
|                |                                                   |                         |               |                        |                                                              | Relative methylation (Cy5/Cy3) | Cy3 signal (Input) | Cy5 signal (MeDIP) | Relative methylation (Cy5/Cy3) | Cy3 signal (Input) | Cy5 signal (MeDIP) |
| A_68_P29116718 | chr13:69749922-69749966                           | NM_175283:397           | Srd5a1        | INSIDE                 | 0.611                                                        | 0.491                          | 1683.52            | 826.10             | 0.300                          | 1354.43            | 406.03             |
| A_68_P20620971 | chr1:134257276-134257320                          | NM_178874:30560         | Tmcc2         | INSIDE                 | 0.611                                                        | 3.302                          | 7294.02            | 24086.94           | 2.019                          | 4591.99            | 9270.90            |
| A_68_P22693141 | chr4:3501940-3501984                              | NM_028097:-47           | Tmem68        | DIVERGENT_PROMOTER     | 0.611                                                        | 0.637                          | 1267.27            | 807.37             | 0.390                          | 883.29             | 344.10             |
| A_68_P24431872 | chr6:49213460-49213504                            | NM_198102:569           | Tra2a         | INSIDE                 | 0.611                                                        | 0.663                          | 1617.45            | 1072.19            | 0.405                          | 1375.13            | 556.98             |
| A_68_P31156940 | chr17:35137702-35137746                           | NM_011690:-127          | Vars          | PROMOTER               | 0.611                                                        | 0.658                          | 1243.88            | 819.07             | 0.402                          | 1014.05            | 407.80             |
| A_68_P30572230 | chr16:17147040-17147084                           | NM_026940:3             | Ydjc          | INSIDE                 | 0.611                                                        | 0.601                          | 883.12             | 530.49             | 0.367                          | 695.06             | 255.05             |
| A_68_P27256916 | chr10:74980191-74980235                           | NM_175133:-145          | 1110038D17Rik | DIVERGENT_PROMOTER     | 0.610                                                        | 0.716                          | 1785.62            | 1279.09            | 0.437                          | 1457.66            | 637.16             |
| A_68_P26586895 | chr9:65142202-65142246                            | NM_001044389:123        | Clpx          | INSIDE                 | 0.610                                                        | 0.495                          | 1320.21            | 653.66             | 0.302                          | 993.50             | 300.26             |
| A_68_P22803188 | chr4:28741959-28742006                            | NM_001122889:1688       | Epha7         | INSIDE                 | 0.610                                                        | 0.475                          | 1383.03            | 657.36             | 0.290                          | 1197.30            | 347.26             |
| A_68_P29268695 | chr13:101262403-101262447                         | NM_022011:140           | Gtf2h2        | INSIDE                 | 0.610                                                        | 0.714                          | 3258.92            | 2328.09            | 0.435                          | 2502.66            | 1089.91            |
| A_68_P24186279 | chr5:150438537-150438581                          | NM_013559:332           | Hsph1         | INSIDE                 | 0.610                                                        | 0.641                          | 2614.15            | 1675.15            | 0.391                          | 1852.45            | 724.07             |
| A_68_P23819018 | chr5:77380092-77380136                            | NM_025939:-321          | Paics         | PROMOTER               | 0.610                                                        | 0.694                          | 2442.61            | 1695.65            | 0.423                          | 1747.29            | 739.64             |
| A_68_P31936609 | chr19:6983898-6983942                             | NM_012021:215           | Prdx5         | INSIDE                 | 0.610                                                        | 0.577                          | 1095.19            | 631.95             | 0.352                          | 840.94             | 295.98             |
| A_68_P29568500 | chr14:45609358-45609402                           | NM_008964:1595          | Ptger2        | INSIDE                 | 0.610                                                        | 0.611                          | 1117.69            | 683.42             | 0.373                          | 827.85             | 308.64             |
| A_68_P26630344 | chr9:72773728-72773772                            | NM_028116:294           | Pygo1         | INSIDE                 | 0.610                                                        | 0.607                          | 1909.56            | 1159.73            | 0.371                          | 1458.27            | 540.37             |
| A_68_P27841330 | chr11:59989954-59989998                           | NM_001037764:36393      | Rai1          | INSIDE                 | 0.610                                                        | 0.405                          | 3478.04            | 1409.63            | 0.247                          | 2566.04            | 634.55             |
| A_68_P22345837 | chr3:95623518-95623562                            | NM_001081293:-664       | Rprd2         | PROMOTER               | 0.610                                                        | 0.691                          | 1853.12            | 1280.45            | 0.422                          | 1463.67            | 617.43             |
| A_68_P21635216 | chr2:131318279-131318323                          | NM_001177833:703        | Smox          | INSIDE                 | 0.610                                                        | 0.636                          | 1055.27            | 671.38             | 0.388                          | 808.80             | 313.76             |
| A_68_P21626548 | chr2:129627604-129627648                          | NR_029452:-431          | 4932416H05Rik | PROMOTER               | 0.609                                                        | 0.560                          | 2485.64            | 1392.84            | 0.342                          | 1718.23            | 586.82             |
| A_68_P26885918 | chr9:121748458-121748502                          | NM_028384:99            | Ccdc13        | INSIDE                 | 0.609                                                        | 0.709                          | 1349.44            | 956.93             | 0.432                          | 1078.83            | 465.64             |
| A_68_P29688239 | chr14:68551910-68551954                           | NM_177780:-303          | Dock5         | PROMOTER               | 0.609                                                        | 0.568                          | 924.51             | 525.56             | 0.346                          | 817.83             | 283.14             |
| A_68_P29671617 | chr14:65716487-65716531                           | NM_018788:435           | Extl3         | INSIDE                 | 0.609                                                        | 0.447                          | 1700.67            | 759.39             | 0.272                          | 1422.87            | 386.99             |
| A_68_P32135377 | chr19:45005799-45005843                           | NM_001081225:212        | Fam178a       | INSIDE                 | 0.609                                                        | 0.559                          | 2677.66            | 1495.88            | 0.340                          | 2182.19            | 741.87             |
| A_68_P25668520 | chr8:13468316-13468360                            | NM_019521:26197         | Gas6          | INSIDE                 | 0.609                                                        | 2.535                          | 1674.75            | 4245.58            | 1.545                          | 1151.97            | 1779.25            |
| A_68_P24318684 | chr6:28083743-28083787                            | NM_008174:605           | Grm8          | INSIDE                 | 0.609                                                        | 0.544                          | 1165.14            | 633.31             | 0.331                          | 960.59             | 317.93             |
| A_68_P20556978 | chr1:121319090-121319134                          | NM_008381:-287          | Inhbb         | PROMOTER               | 0.609                                                        | 0.628                          | 862.01             | 541.47             | 0.383                          | 748.04             | 286.33             |
| A_68_P26018638 | chr8:86707466-86707510                            | NR_029821:-4628         | Mir181c       | PROMOTER               | 0.609                                                        | 0.570                          | 1613.66            | 920.38             | 0.348                          | 1165.56            | 405.13             |
| A_68_P31000878 | chr16:97985324-97985368                           | NM_023663:16            | Ripk4         | INSIDE                 | 0.609                                                        | 0.500                          | 2313.74            | 1156.23            | 0.304                          | 1915.25            | 582.80             |
| A_68_P28177384 | chr11:119217045-119217089                         | NM_178743:196           | Slc26a11      | INSIDE                 | 0.609                                                        | 0.605                          | 1646.79            | 996.71             | 0.369                          | 1314.26            | 484.36             |
| A_68_P22659972 | chr3:153636247-153636291                          | NM_001081263:-131       | Slc44a5       | PROMOTER               | 0.609                                                        | 0.592                          | 962.49             | 569.93             | 0.361                          | 806.88             | 291.12             |
| A_68_P22889891 | chr4:46663047-46663091                            | NM_198664:3             | Tbc1d2        | INSIDE                 | 0.609                                                        | 0.618                          | 2097.59            | 1295.27            | 0.376                          | 1552.68            | 584.26             |
| A_68_P31620719 | chr18:36048780-36048824                           |                         | Unknown       | Unknown                | 0.609                                                        | 0.403                          | 1830.91            | 738.23             | 0.246                          | 1525.10            | 374.46             |
| A_68_P23637941 | chr5:42235067-42235111                            | NM_001081422:466        | Bod11         | INSIDE                 | 0.608                                                        | 0.500                          | 1234.59            | 617.58             | 0.304                          | 1086.26            | 330.62             |
| A_68_P23351276 | chr4:138908601-138908645                          | NM_001039200:115        | C230096C10Rik | INSIDE                 | 0.608                                                        | 0.625                          | 1153.69            | 720.54             | 0.380                          | 790.46             | 300.24             |
| A_68_P20740951 | chr1:157820596-157820640                          | NM_001039184:-233       | Cep350        | PROMOTER               | 0.608                                                        | 0.675                          | 1368.22            | 923.57             | 0.410                          | 1014.32            | 416.26             |
| A_68_P24850800 | chr6:131338648-131338692                          | NM_011733:-202          | Csda          | PROMOTER               | 0.608                                                        | 0.474                          | 1407.49            | 667.06             | 0.288                          | 1216.73            | 350.56             |
| A_68_P25616319 | chr8:4166672-4166716                              | NM_001039578:128        | Evi5l         | INSIDE                 | 0.608                                                        | 0.490                          | 2932.47            | 1437.51            | 0.298                          | 2388.07            | 711.77             |
| A_68_P27282041 | chr10:79723845-79723889                           | NM_010255:-153          | Gamt          | DIVERGENT_PROMOTER     | 0.608                                                        | 0.660                          | 1685.06            | 1111.51            | 0.401                          | 1312.24            | 526.41             |
| A_68_P23417747 | chr4:151661148-151661192                          | NM_008237:4601          | Hes3          | INSIDE                 | 0.608                                                        | 0.535                          | 2896.06            | 1550.47            | 0.325                          | 2289.36            | 745.00             |
| A_68_P20058158 | chr1:17087056-17087100                            | NM_020604:892           | Jph1          | INSIDE                 | 0.608                                                        | 0.604                          | 1157.64            | 699.31             | 0.367                          | 976.90             | 358.60             |
| A_68_P25503046 | chr7:134072788-134072832                          | NM_172747:418           | Ketd13        | INSIDE                 | 0.608                                                        | 0.679                          | 1493.07            | 1014.50            | 0.413                          | 1249.56            | 516.54             |
| A_68_P20164265 | chr1:39250200-39250244                            | NM_008719:-894          | Npas2         | PROMOTER               | 0.608                                                        | 0.623                          | 2167.63            | 1350.98            | 0.379                          | 1748.67            | 662.81             |
| A_68_P20134288 | chr1:33726517-33726564                            | NM_008922:63            | Prim2         | INSIDE                 | 0.608                                                        | 0.507                          | 1021.62            | 518.28             | 0.308                          | 697.23             | 215.01             |
| A_68_P20304094 | chr1:66747456-66747500                            | NM_025683:12            | Rpe           | INSIDE                 | 0.608                                                        | 0.534                          | 1472.35            | 785.78             | 0.325                          | 1219.74            | 395.84             |
| A_68_P26804660 | chr9:106587656-106587700                          | NM_011573:320           | Tex264        | INSIDE                 | 0.608                                                        | 0.587                          | 1043.54            | 612.71             | 0.357                          | 872.80             | 311.83             |
| A_68_P23186774 | chr4:106511714-106511758                          | ENSMUST00000151369:8789 |               | DOWNSTREAM             | 0.608                                                        | 0.451                          | 1198.88            | 541.18             | 0.274                          | 1005.49            | 275.96             |
| A_68_P23391468 | chr4:147315734-147315778                          | NM_029841:753           | 2510039018Rik | INSIDE                 | 0.607                                                        | 0.686                          | 1454.28            | 997.18             | 0.416                          | 1186.43            | 493.83             |
| A_68_P27534003 | chr10:126528845-126528889                         | NM_001033263:12904      | Agap2         | INSIDE                 | 0.607                                                        | 0.585                          | 2525.24            | 1476.80            | 0.355                          | 1894.39            | 672.92             |
| A_68_P22069323 | chr3:38354784-38354828                            | NM_001167883:28932      | Ankrd50       | INSIDE                 | 0.607                                                        | 2.767                          | 733.56             | 2029.72            | 1.680                          | 686.76             | 1153.66            |
| A_68_P23262162 | chr4:123020250-123020294                          | NM_007558:-226          | Bmp8a         | PROMOTER               | 0.607                                                        | 0.528                          | 1218.13            | 642.86             | 0.321                          | 1020.81            | 327.24             |
| A_68_P31932622 | chr19:6085142-6085186                             | NM_026410:68            | Cdca5         | INSIDE                 | 0.607                                                        | 0.455                          | 2496.54            | 1136.69            | 0.276                          | 2019.11            | 557.75             |



| ProbeName      | Target position of probe on CpG island microarray | TargetID           | GeneSymbol    | CpG island Description | Ratio of relative methylation (TiO <sub>2</sub> -NP/Vehicle) | Sham group                     |                    |                    | TiO <sub>2</sub> -H group      |                    |                    |
|----------------|---------------------------------------------------|--------------------|---------------|------------------------|--------------------------------------------------------------|--------------------------------|--------------------|--------------------|--------------------------------|--------------------|--------------------|
|                |                                                   |                    |               |                        |                                                              | Relative methylation (Cy5/Cy3) | Cy3 signal (Input) | Cy5 signal (MeDIP) | Relative methylation (Cy5/Cy3) | Cy3 signal (Input) | Cy5 signal (MeDIP) |
| A_68_P25951436 | chr8:72898442-72898446                            | NM_016685:1018     | Comp          | INSIDE                 | 0.607                                                        | 0.631                          | 1820.77            | 1149.15            | 0.383                          | 1374.59            | 526.43             |
| A_68_P31259843 | chr17:57201503-57201547                           | NM_177638:-175     | Crb3          | DIVERGENT_PROMOTER     | 0.607                                                        | 0.687                          | 2382.63            | 1636.66            | 0.417                          | 1768.01            | 737.28             |
| A_68_P28924079 | chr13:31718773-31718817                           | NM_010225:1110     | Foxf2         | INSIDE                 | 0.607                                                        | 0.700                          | 4496.20            | 3149.18            | 0.425                          | 3390.73            | 1440.90            |
| A_68_P24757355 | chr6:113027040-113027084                          | NR_027010:176      | Gt(ROSA)26Sor | INSIDE                 | 0.607                                                        | 0.391                          | 1817.88            | 711.35             | 0.238                          | 1389.91            | 330.26             |
| A_68_P31099379 | chr17:24889503-24889547                           | NM_001012402:-423  | Hs3st6        | PROMOTER               | 0.607                                                        | 0.650                          | 1028.18            | 668.07             | 0.394                          | 828.92             | 326.80             |
| A_68_P26658578 | chr9:78023836-78023880                            | NM_019987:62814    | lck           | DOWNSTREAM             | 0.607                                                        | 0.721                          | 1741.92            | 1256.45            | 0.438                          | 1372.60            | 601.28             |
| A_68_P26228658 | chr8:124277668-124277712                          | NM_020605:23232    | Jph3          | INSIDE                 | 0.607                                                        | 3.557                          | 2747.82            | 9774.66            | 2.159                          | 1848.26            | 3989.51            |
| A_68_P32028425 | chr19:25311521-25311565                           | NM_181404:-149     | Kank1         | PROMOTER               | 0.607                                                        | 0.703                          | 1355.53            | 953.17             | 0.426                          | 1111.31            | 473.97             |
| A_68_P21900915 | chr2:179759580-179759624                          | NM_177727:-89      | Lsm14b        | PROMOTER               | 0.607                                                        | 0.659                          | 901.20             | 593.66             | 0.400                          | 874.32             | 349.57             |
| A_68_P26797102 | chr9:105297505-105297549                          | NM_172461:91       | Nek11         | INSIDE                 | 0.607                                                        | 0.404                          | 1654.00            | 667.97             | 0.245                          | 1435.81            | 352.11             |
| A_68_P24763851 | chr6:114081597-114081161                          | NM_172890:384      | Slc6a11       | INSIDE                 | 0.607                                                        | 0.648                          | 1224.23            | 793.89             | 0.394                          | 1041.94            | 410.18             |
| A_68_P27226083 | chr10:69285075-69285119                           | NM_146005:288641   | Ank3          | INSIDE                 | 0.606                                                        | 2.579                          | 1959.05            | 5052.22            | 1.563                          | 1565.26            | 2446.25            |
| A_68_P23252015 | chr4:120242852-120242896                          | NM_016748:7        | Ctps          | INSIDE                 | 0.606                                                        | 0.510                          | 1269.60            | 647.95             | 0.309                          | 1139.09            | 352.38             |
| A_68_P28463221 | chr12:58647081-58647125                           | NM_008259:6        | Foxa1         | INSIDE                 | 0.606                                                        | 0.499                          | 1992.93            | 993.54             | 0.302                          | 1599.98            | 483.68             |
| A_68_P21901246 | chr2:179805450-179805494                          | NM_001083328:175   | Gtbp5         | INSIDE                 | 0.606                                                        | 0.631                          | 1197.29            | 756.00             | 0.382                          | 882.63             | 337.49             |
| A_68_P22405344 | chr3:107082299-107082343                          | NM_026774:545      | Hbxip         | INSIDE                 | 0.606                                                        | 0.598                          | 1435.14            | 858.53             | 0.363                          | 1185.10            | 429.74             |
| A_68_P23300617 | chr4:129816677-129816721                          | NM_198959:-292     | Hertf1        | PROMOTER               | 0.606                                                        | 0.656                          | 1169.89            | 767.48             | 0.397                          | 941.02             | 373.98             |
| A_68_P22388055 | chr3:103594904-103594948                          | NM_010432:272      | Hipk1         | INSIDE                 | 0.606                                                        | 0.677                          | 1287.47            | 872.07             | 0.411                          | 995.39             | 408.69             |
| A_68_P30348454 | chr15:76288272-76288316                           | NM_198885:427      | Sex           | INSIDE                 | 0.606                                                        | 0.519                          | 1891.00            | 981.97             | 0.315                          | 1523.61            | 479.34             |
| A_68_P20585380 | chr1:127457355-127457399                          | NM_028787:-216     | Slc35f5       | PROMOTER               | 0.606                                                        | 0.427                          | 1335.57            | 570.20             | 0.259                          | 1127.49            | 291.80             |
| A_68_P21749219 | chr2:152240057-152240101                          | NM_175126:702      | Zcche3        | INSIDE                 | 0.606                                                        | 0.611                          | 1622.07            | 991.19             | 0.370                          | 1373.36            | 508.34             |
| A_68_P27172917 | chr10:59649185-59649231                           | NM_016803:32800    | Chst3         | INSIDE                 | 0.605                                                        | 2.849                          | 1161.45            | 3308.62            | 1.725                          | 971.49             | 1675.68            |
| A_68_P32145202 | chr19:46728964-46729014                           | NM_001177813:31098 | D19Wsu162c    | INSIDE                 | 0.605                                                        | 3.450                          | 2587.61            | 8926.64            | 2.086                          | 1851.03            | 3860.42            |
| A_68_P26015687 | chr8:86132654-86132698                            | NM_018808:603      | Dnajb1        | INSIDE                 | 0.605                                                        | 0.595                          | 1336.38            | 794.62             | 0.360                          | 1176.46            | 423.12             |
| A_68_P29002205 | chr13:45602874-45602918                           | NM_025508:59       | Gmpr          | INSIDE                 | 0.605                                                        | 0.546                          | 1397.33            | 763.28             | 0.330                          | 1112.58            | 367.64             |
| A_68_P26531866 | chr9:55389590-55389634                            | NM_027397:657      | Isl2          | INSIDE                 | 0.605                                                        | 0.456                          | 1252.05            | 571.38             | 0.276                          | 1095.48            | 302.45             |
| A_68_P30656039 | chr16:33062880-33062924                           | NM_172823:296      | Lmln          | INSIDE                 | 0.605                                                        | 0.441                          | 2475.71            | 1090.93            | 0.266                          | 1927.64            | 513.59             |
| A_68_P28457439 | chr12:57634754-57634798                           | NM_001146198:1317  | Nkx2-1        | INSIDE                 | 0.605                                                        | 0.467                          | 1609.36            | 751.63             | 0.283                          | 1341.25            | 379.02             |
| A_68_P28056108 | chr11:98248019-98248063                           | NM_008890:95       | Pnmt          | INSIDE                 | 0.605                                                        | 0.728                          | 1962.01            | 1429.14            | 0.440                          | 1588.81            | 699.84             |
| A_68_P24950722 | chr7:4781562-4781606                              | NM_172737:14714    | Shisa7        | INSIDE                 | 0.605                                                        | 2.517                          | 2137.86            | 5380.02            | 1.523                          | 1644.26            | 2504.79            |
| A_68_P22864088 | chr4:41687513-41687565                            | NM_011014:648      | Sigmar1       | INSIDE                 | 0.605                                                        | 0.638                          | 872.40             | 556.37             | 0.386                          | 665.26             | 256.65             |
| A_68_P27504460 | chr10:121043018-121043071                         | NM_001081056:20328 | Xpot          | INSIDE                 | 0.605                                                        | 2.799                          | 725.45             | 2030.52            | 1.694                          | 566.97             | 960.58             |
| A_68_P31092274 | chr17:23684082-23684126                           | NM_001033496:17089 | Zfp213        | DOWNSTREAM             | 0.605                                                        | 0.578                          | 1127.59            | 651.49             | 0.349                          | 909.99             | 317.95             |
| A_68_P28747156 | chr12:113205010-113205054                         | NM_027360:156      | 2010107E04Rik | INSIDE                 | 0.604                                                        | 0.507                          | 1478.02            | 750.02             | 0.306                          | 1230.96            | 376.99             |
| A_68_P27320001 | chr10:86955807-86955851                           | NM_008553:577      | Asc11         | INSIDE                 | 0.604                                                        | 0.595                          | 2074.22            | 1235.00            | 0.359                          | 1735.27            | 623.81             |
| A_68_P24248438 | chr6:13628084-13628128                            | NM_175312:-140     | B630005N14Rik | PROMOTER               | 0.604                                                        | 0.604                          | 3333.22            | 2014.92            | 0.365                          | 2409.21            | 879.89             |
| A_68_P30964663 | chr16:91729071-91729122                           | NM_026994:-49      | Cryz11        | DIVERGENT_PROMOTER     | 0.604                                                        | 0.597                          | 1606.66            | 959.02             | 0.361                          | 1232.55            | 444.72             |
| A_68_P27997845 | chr11:87913051-87913095                           | NM_198013:425      | Cuedc1        | INSIDE                 | 0.604                                                        | 0.638                          | 1295.02            | 826.82             | 0.386                          | 1219.44            | 470.60             |
| A_68_P26572463 | chr9:62658873-62658917                            | NM_010193:561      | Fem1b         | INSIDE                 | 0.604                                                        | 0.724                          | 2162.60            | 1565.76            | 0.437                          | 1624.45            | 710.21             |
| A_68_P31217285 | chr17:48548234-48548282                           | NM_001110832:887   | Nfya          | INSIDE                 | 0.604                                                        | 0.543                          | 1238.29            | 672.28             | 0.328                          | 995.94             | 326.52             |
| A_68_P29011093 | chr13:47106234-47106282                           | NM_175340:3961     | Nhlrc1        | DOWNSTREAM             | 0.604                                                        | 3.761                          | 2716.80            | 10217.71           | 2.271                          | 1867.85            | 4242.03            |
| A_68_P27900565 | chr11:70223680-70223724                           | NM_029231:-169     | Pelp1         | PROMOTER               | 0.604                                                        | 0.542                          | 3105.07            | 1684.38            | 0.327                          | 2393.70            | 783.69             |
| A_68_P21928444 | chr3:7366471-7366516                              | NM_008862:-110     | Pkia          | PROMOTER               | 0.604                                                        | 0.582                          | 1249.51            | 726.84             | 0.352                          | 978.78             | 344.14             |
| A_68_P23981857 | chr5:111209299-111209343                          | NM_001025561:295   | Pus1          | INSIDE                 | 0.604                                                        | 0.690                          | 2104.92            | 1453.25            | 0.417                          | 1734.51            | 723.61             |
| A_68_P28069222 | chr11:100501295-100501339                         | NM_177790:10691    | Zfp385c       | INSIDE                 | 0.604                                                        | 0.612                          | 1173.82            | 718.80             | 0.370                          | 897.51             | 331.73             |
| A_68_P26351028 | chr9:22064295-22064339                            | NM_181419:23       | Zfp599        | INSIDE                 | 0.604                                                        | 0.523                          | 1647.92            | 861.06             | 0.316                          | 1267.56            | 400.15             |
| A_68_P30245927 | chr15:57908540-57908584                           | NM_001042438:-518  | Zhx1          | PROMOTER               | 0.604                                                        | 0.659                          | 906.18             | 597.41             | 0.398                          | 684.63             | 272.56             |
| A_68_P22217911 | chr3:68673203-68673247                            | NM_001167996:-283  | 1110032F04Rik | PROMOTER               | 0.603                                                        | 0.508                          | 1114.32            | 566.44             | 0.306                          | 941.56             | 288.50             |
| A_68_P21967930 | chr3:17686893-17686937                            | NR_033490:-3006    | 2610100L16Rik | PROMOTER               | 0.603                                                        | 0.621                          | 1124.67            | 697.86             | 0.374                          | 890.64             | 332.99             |
| A_68_P30475231 | chr15:98397707-98397751                           | NR_028442:-26      | 9330020H09Rik | PROMOTER               | 0.603                                                        | 0.522                          | 2177.89            | 1136.61            | 0.315                          | 1624.71            | 511.56             |
| A_68_P28084858 | chr11:103222146-103222190                         | NM_001205236:2838  | Arhgap27      | INSIDE                 | 0.603                                                        | 0.558                          | 1261.80            | 703.64             | 0.337                          | 945.53             | 318.21             |

| ProbeName      | Target position of probe on CpG island microarray | TargetID               | GeneSymbol    | CpG island Description | Ratio of relative methylation (TiO <sub>2</sub> -NP/Vehicle) | Sham group                     |                    |                    | TiO <sub>2</sub> -H group      |                    |                    |
|----------------|---------------------------------------------------|------------------------|---------------|------------------------|--------------------------------------------------------------|--------------------------------|--------------------|--------------------|--------------------------------|--------------------|--------------------|
|                |                                                   |                        |               |                        |                                                              | Relative methylation (Cy5/Cy3) | Cy3 signal (Input) | Cy5 signal (MeDIP) | Relative methylation (Cy5/Cy3) | Cy3 signal (Input) | Cy5 signal (MeDIP) |
| A_68_P22314832 | chr3:88425175-88425219                            | NM_001198912:-119      | Arhgef2       | PROMOTER               | 0.603                                                        | 0.440                          | 1225.51            | 538.80             | 0.265                          | 984.79             | 261.27             |
| A_68_P24639203 | chr6:91422971-91423017                            | NM_133928:423          | Chchd4        | INSIDE                 | 0.603                                                        | 0.611                          | 1014.68            | 619.91             | 0.368                          | 765.80             | 282.03             |
| A_68_P28158778 | chr11:116196536-116196580                         | NM_008240:110          | Foxj1         | INSIDE                 | 0.603                                                        | 0.698                          | 1889.70            | 1318.66            | 0.421                          | 1406.04            | 591.32             |
| A_68_P28577473 | chr12:81859415-81859459                           | NM_001008423:2266      | Gm1568        | INSIDE                 | 0.603                                                        | 3.825                          | 273.66             | 1046.71            | 2.308                          | 341.37             | 787.73             |
| A_68_P22907354 | chr4:49858702-49858746                            | NM_001033351:-771      | Grin3a        | PROMOTER               | 0.603                                                        | 0.582                          | 1701.90            | 990.30             | 0.351                          | 1147.95            | 402.82             |
| A_68_P31158870 | chr17:35457706-35457750                           | NM_010390:226          | H2-Q1         | INSIDE                 | 0.603                                                        | 0.547                          | 1166.12            | 638.01             | 0.330                          | 983.84             | 324.67             |
| A_68_P20455838 | chr1:95375093-95375137                            | NM_133808:271          | Hdlbp         | INSIDE                 | 0.603                                                        | 0.536                          | 1707.94            | 915.49             | 0.323                          | 1274.21            | 411.62             |
| A_68_P27987932 | chr11:86070867-86070911                           | NM_027421:182          | Ints2         | INSIDE                 | 0.603                                                        | 0.513                          | 1126.92            | 578.10             | 0.310                          | 851.72             | 263.63             |
| A_68_P29240037 | chr13:96095372-96095416                           | NR_035461:-5140        | Mir1940       | PROMOTER               | 0.603                                                        | 0.517                          | 2115.72            | 1093.90            | 0.312                          | 1826.87            | 569.57             |
| A_68_P22336828 | chr3:93324960-93325004                            | NM_016740:565          | S100a11       | INSIDE                 | 0.603                                                        | 0.580                          | 1343.79            | 779.27             | 0.350                          | 1075.51            | 375.97             |
| A_68_P24153575 | chr5:143582152-143582196                          | NM_001122730:-3108     | Tnrc18        | PROMOTER               | 0.603                                                        | 0.599                          | 1074.49            | 643.17             | 0.361                          | 846.95             | 305.86             |
| A_68_P20877471 | chr1:182656470-182656514                          | NM_133225:319          | Acbd3         | INSIDE                 | 0.602                                                        | 0.472                          | 2000.22            | 943.87             | 0.284                          | 1672.07            | 474.65             |
| A_68_P27271774 | chr10:77506231-77506275                           | NM_009646:73           | Aire          | INSIDE                 | 0.602                                                        | 0.694                          | 2650.11            | 1838.64            | 0.418                          | 2071.33            | 865.39             |
| A_68_P23893979 | chr5:92821310-92821354                            | NM_181728:60466        | Art3          | INSIDE                 | 0.602                                                        | 2.868                          | 1474.08            | 4228.29            | 1.727                          | 1177.63            | 2033.79            |
| A_68_P24160783 | chr5:145118513-145118557                          | NM_025833:447          | Baiap211      | INSIDE                 | 0.602                                                        | 0.630                          | 2141.54            | 1348.14            | 0.379                          | 1824.01            | 691.42             |
| A_68_P20618861 | chr1:133904468-133904512                          | NM_007923:309          | Elk4          | INSIDE                 | 0.602                                                        | 0.632                          | 2302.05            | 1453.89            | 0.380                          | 1819.24            | 691.20             |
| A_68_P27996720 | chr11:87684836-87684880                           | NM_007946:4180         | Epx           | INSIDE                 | 0.602                                                        | 2.771                          | 723.69             | 2005.40            | 1.669                          | 593.25             | 990.38             |
| A_68_P26224342 | chr8:123606667-123606711                          | NM_010426:-1685        | Foxf1a        | PROMOTER               | 0.602                                                        | 0.463                          | 1434.04            | 663.83             | 0.279                          | 1035.19            | 288.39             |
| A_68_P26035031 | chr8:89996648-89996692                            | NR_033430:-40          | Gm2694        | DIVERGENT_PROMOTER     | 0.602                                                        | 0.465                          | 1283.10            | 596.31             | 0.280                          | 1145.03            | 320.35             |
| A_68_P28086531 | chr11:103558931-103558975                         | NM_019650:72           | Gosr2         | INSIDE                 | 0.602                                                        | 0.456                          | 1316.56            | 600.68             | 0.275                          | 1112.71            | 305.66             |
| A_68_P21957225 | chr3:14533992-14534036                            | NM_001163579:227       | Lrrcc1        | INSIDE                 | 0.602                                                        | 0.606                          | 2893.89            | 1754.91            | 0.365                          | 2195.12            | 801.46             |
| A_68_P27897807 | chr11:69715139-69715183                           | NM_001013414:-219      | Neur4         | DIVERGENT_PROMOTER     | 0.602                                                        | 0.370                          | 2029.20            | 751.82             | 0.223                          | 1519.97            | 338.98             |
| A_68_P31107657 | chr17:26122228-26122272                           | NM_153140:36555        | Rab11fip3     | DOWNSTREAM             | 0.602                                                        | 0.534                          | 1205.51            | 643.56             | 0.321                          | 1061.30            | 341.07             |
| A_68_P27943642 | chr11:78304280-78304324                           | NM_001168521:6954      | Sarm1         | INSIDE                 | 0.602                                                        | 0.680                          | 1333.95            | 906.64             | 0.409                          | 1015.98            | 415.37             |
| A_68_P25372613 | chr7:108470115-108470159                          | NM_019990:304          | Stard10       | INSIDE                 | 0.602                                                        | 0.601                          | 1988.33            | 1195.02            | 0.362                          | 1657.57            | 599.40             |
| A_68_P26018926 | chr8:86761267-86761311                            | NM_172503:-347         | Zswim4        | PROMOTER               | 0.602                                                        | 0.548                          | 1005.10            | 550.67             | 0.330                          | 789.16             | 260.26             |
| A_68_P29509891 | chr14:31944757-31944801                           | NR_024069:-2662        | 201010707Rik  | DIVERGENT_PROMOTER     | 0.601                                                        | 5.677                          | 1068.55            | 6065.94            | 3.414                          | 867.90             | 2962.98            |
| A_68_P27179426 | chr10:60708843-60708887                           | NM_001081127:27322     | Adams14       | INSIDE                 | 0.601                                                        | 2.570                          | 1597.10            | 4104.40            | 1.544                          | 1165.79            | 1800.06            |
| A_68_P25597927 | chr7:150153952-150153996                          | NM_008554:1195         | Ascl2         | INSIDE                 | 0.601                                                        | 0.661                          | 3359.94            | 2222.43            | 0.397                          | 2505.57            | 995.60             |
| A_68_P28115684 | chr11:108782304-108782348                         | NM_015732:664          | Axin2         | INSIDE                 | 0.601                                                        | 0.494                          | 3204.51            | 1581.72            | 0.297                          | 2628.61            | 779.86             |
| A_68_P25501815 | chr7:133839681-133839725                          | NM_175103:189          | Bola2         | INSIDE                 | 0.601                                                        | 0.393                          | 1973.25            | 775.55             | 0.236                          | 1391.41            | 328.75             |
| A_68_P27155060 | chr10:55948706-55948750                           | NM_001033385:-233      | D630037F22Rik | PROMOTER               | 0.601                                                        | 0.666                          | 895.17             | 596.40             | 0.400                          | 671.00             | 268.64             |
| A_68_P24125311 | chr5:137791525-137791569                          | NM_001159571:210       | Ephb4         | INSIDE                 | 0.601                                                        | 0.588                          | 4521.60            | 2657.53            | 0.353                          | 3480.29            | 1229.09            |
| A_68_P27561149 | chr11:4961389-4961433                             | NM_001190406:3920      | Gas2l1        | INSIDE                 | 0.601                                                        | 0.560                          | 2634.12            | 1474.41            | 0.337                          | 2254.87            | 758.77             |
| A_68_P26821065 | chr9:109834739-109834783                          | NM_001205331:483       | Mtap4         | INSIDE                 | 0.601                                                        | 0.735                          | 2605.53            | 1914.22            | 0.441                          | 1897.80            | 837.46             |
| A_68_P29591677 | chr14:49685584-49685628                           | NM_144535:-563         | Mudeng        | PROMOTER               | 0.601                                                        | 0.570                          | 2138.88            | 1220.06            | 0.343                          | 1757.77            | 602.70             |
| A_68_P29060115 | chr13:56353410-56353454                           | NM_010896:92           | Neurog1       | INSIDE                 | 0.601                                                        | 0.682                          | 2951.80            | 2013.31            | 0.410                          | 2345.20            | 961.68             |
| A_68_P28223705 | chr12:8681057-8681101                             | NM_030723:-408         | Pum2          | PROMOTER               | 0.601                                                        | 0.620                          | 1390.83            | 862.72             | 0.373                          | 982.46             | 366.01             |
| A_68_P28830400 | chr13:12198333-12198377                           | NM_023868:858          | Ryr2          | INSIDE                 | 0.601                                                        | 0.548                          | 1628.34            | 891.62             | 0.329                          | 1428.77            | 470.24             |
| A_68_P24120066 | chr5:136707860-136707905                          | NM_018825:12891        | Sh2b2         | INSIDE                 | 0.601                                                        | 2.852                          | 1914.56            | 5460.69            | 1.713                          | 1297.49            | 2222.73            |
| A_68_P29729988 | chr14:76186558-76186602                           | NM_026232:264          | Slc25a30      | INSIDE                 | 0.601                                                        | 0.525                          | 1223.05            | 642.53             | 0.316                          | 965.31             | 304.96             |
| A_68_P25952901 | chr8:73122626-73122670                            | NM_133772:9564         | Ssbp4         | INSIDE                 | 0.601                                                        | 2.646                          | 2179.14            | 5766.93            | 1.591                          | 1340.71            | 2133.65            |
| A_68_P28339006 | chr12:33638754-33638798                           | NM_013635:-33          | Syp1          | PROMOTER               | 0.601                                                        | 0.482                          | 1530.53            | 737.06             | 0.290                          | 1198.52            | 347.09             |
| A_68_P32147505 | chr19:47149484-47149530                           | NM_177342:7269         | Taf5          | INSIDE                 | 0.601                                                        | 3.208                          | 269.63             | 865.01             | 1.927                          | 289.71             | 558.29             |
| A_68_P24850991 | chr6:131383858-131383902                          |                        | Unknown       |                        | 0.601                                                        | 0.595                          | 2288.24            | 1361.69            | 0.358                          | 1976.50            | 706.73             |
| A_68_P25087377 | chr7:51684556-51684600                            | ENSMUST00000127790:191 |               | INSIDE                 | 0.601                                                        | 0.488                          | 2152.66            | 1051.28            | 0.294                          | 1622.87            | 476.62             |
| A_68_P30092466 | chr15:27396756-27396800                           | NM_020332:347          | Ank           | INSIDE                 | 0.600                                                        | 0.632                          | 3710.37            | 2345.48            | 0.379                          | 2786.22            | 1055.95            |
| A_68_P31678446 | chr18:46887405-46887449                           | NM_033037:570          | Cdo1          | INSIDE                 | 0.600                                                        | 0.570                          | 1542.13            | 879.69             | 0.342                          | 1208.86            | 413.91             |
| A_68_P26971606 | chr10:17444088-17444133                           | NM_010828:1077         | Cited2        | INSIDE                 | 0.600                                                        | 0.664                          | 1726.83            | 1146.50            | 0.398                          | 1241.37            | 494.69             |
| A_68_P27280209 | chr10:79451266-79451310                           | NM_007725:-56          | Cnn2          | DIVERGENT_PROMOTER     | 0.600                                                        | 0.498                          | 1202.49            | 598.45             | 0.299                          | 900.74             | 269.17             |
| A_68_P24295435 | chr6:23204086-23204130                            | NM_028462:-5844        | Fezf1         | PROMOTER               | 0.600                                                        | 0.695                          | 1354.26            | 940.63             | 0.417                          | 1081.26            | 450.87             |

| ProbeName      | Target position of probe on CpG island microarray | TargetID                | GeneSymbol    | CpG island Description | Ratio of relative methylation (TiO <sub>2</sub> -NP/Vehicle) | Sham group                     |                    |                    | TiO <sub>2</sub> -H group      |                    |                    |
|----------------|---------------------------------------------------|-------------------------|---------------|------------------------|--------------------------------------------------------------|--------------------------------|--------------------|--------------------|--------------------------------|--------------------|--------------------|
|                |                                                   |                         |               |                        |                                                              | Relative methylation (Cy5/Cy3) | Cy3 signal (Input) | Cy5 signal (MeDIP) | Relative methylation (Cy5/Cy3) | Cy3 signal (Input) | Cy5 signal (MeDIP) |
| A_68_P27137650 | chr10:52137866-52137910                           | NM_030250:536           | Nus1          | INSIDE                 | 0.600                                                        | 0.572                          | 1525.12            | 872.76             | 0.343                          | 1337.33            | 459.15             |
| A_68_P22518783 | chr3:128921672-128921716                          | NM_001042502:4840       | Pitx2         | INSIDE                 | 0.600                                                        | 0.588                          | 887.59             | 522.06             | 0.353                          | 736.64             | 259.96             |
| A_68_P28190288 | chr11:121249326-121249370                         | NM_139147:217           | Rab40b        | INSIDE                 | 0.600                                                        | 0.634                          | 866.71             | 549.64             | 0.380                          | 758.05             | 288.27             |
| A_68_P30343544 | chr15:75543867-75543911                           | NM_001163465:9171       | Rhpn1         | INSIDE                 | 0.600                                                        | 2.680                          | 2917.76            | 7820.67            | 1.607                          | 2077.65            | 3339.03            |
| A_68_P20715112 | chr1:153348264-153348308                          | NM_011277:-333          | Rnf2          | PROMOTER               | 0.600                                                        | 0.662                          | 1196.30            | 791.90             | 0.397                          | 978.14             | 388.20             |
| A_68_P31106589 | chr17:25970569-25970614                           | NM_019719:-285          | Stub1         | PROMOTER               | 0.600                                                        | 0.508                          | 1234.01            | 627.21             | 0.305                          | 958.01             | 291.94             |
| A_68_P23441977 | chr4:155409010-155409054                          | NM_029264:15894         | Tull10        | INSIDE                 | 0.600                                                        | 0.598                          | 988.82             | 590.88             | 0.358                          | 850.24             | 304.68             |
| A_68_P25469455 | chr7:127778730-127778774                          | NM_025899:50            | Uqere2        | INSIDE                 | 0.600                                                        | 0.556                          | 1663.72            | 924.96             | 0.333                          | 1301.62            | 433.87             |
| A_68_P20735709 | chr1:156930520-156930564                          | ENSMUST00000128143:-146 |               | PROMOTER               | 0.600                                                        | 0.422                          | 4388.75            | 1850.51            | 0.253                          | 3340.67            | 845.51             |
| A_68_P26541149 | chr9:57110346-57110390                            | NM_028820:38            | 1700017B05Rik | INSIDE                 | 0.599                                                        | 0.630                          | 1570.04            | 989.76             | 0.378                          | 1379.00            | 520.84             |
| A_68_P28184735 | chr11:120328666-120328710                         | NM_197995:226           | Arl16         | INSIDE                 | 0.599                                                        | 0.697                          | 1341.45            | 935.31             | 0.418                          | 1020.53            | 426.48             |
| A_68_P20941835 | chr1:193960556-193960600                          | NR_033536:-201          | Gm10516       | PROMOTER               | 0.599                                                        | 0.631                          | 1911.71            | 1206.98            | 0.378                          | 1339.15            | 506.58             |
| A_68_P29842699 | chr14:99698157-99698201                           | NM_009769:269           | Klf5          | INSIDE                 | 0.599                                                        | 0.627                          | 1269.40            | 795.40             | 0.375                          | 1196.09            | 448.72             |
| A_68_P29266706 | chr13:100785478-100785522                         | NM_030026:94            | Mecc2         | INSIDE                 | 0.599                                                        | 0.479                          | 1263.17            | 604.47             | 0.286                          | 969.08             | 277.61             |
| A_68_P20352131 | chr1:75121569-75121613                            | NM_029342:210           | Nhej1         | INSIDE                 | 0.599                                                        | 0.565                          | 1094.85            | 618.55             | 0.338                          | 909.93             | 307.82             |
| A_68_P30656972 | chr16:33251779-33251823                           | NM_080557:259           | Snx4          | INSIDE                 | 0.599                                                        | 0.405                          | 1770.76            | 717.61             | 0.243                          | 1379.56            | 334.67             |
| A_68_P21117288 | chr2:32612911-32612955                            | NM_152800:142           | Tor2a         | INSIDE                 | 0.599                                                        | 0.668                          | 1061.59            | 709.04             | 0.400                          | 876.03             | 350.28             |
| A_68_P28280594 | chr12:21423400-21423444                           | NM_011739:-125          | Ywhaq         | PROMOTER               | 0.599                                                        | 0.456                          | 1720.19            | 783.97             | 0.273                          | 1289.76            | 351.84             |
| A_68_P24798989 | chr6:120481488-120481532                          | NM_144815:-193          | Cecr5         | PROMOTER               | 0.598                                                        | 0.628                          | 1119.77            | 702.70             | 0.376                          | 763.89             | 286.89             |
| A_68_P28684631 | chr12:102137378-102137422                         | NM_001177674:334        | Gpr68         | INSIDE                 | 0.598                                                        | 0.509                          | 1290.68            | 656.58             | 0.304                          | 975.80             | 296.96             |
| A_68_P30961691 | chr16:91226111-91226155                           | NM_016967:338           | Olig2         | INSIDE                 | 0.598                                                        | 0.611                          | 1189.41            | 726.43             | 0.365                          | 904.05             | 330.23             |
| A_68_P28107298 | chr11:107341035-107341079                         | NM_025894:215           | Psmc12        | INSIDE                 | 0.598                                                        | 0.445                          | 1765.52            | 785.03             | 0.266                          | 1435.59            | 381.52             |
| A_68_P22659666 | chr3:153576060-153576104                          | NM_001163478:-152       | Rabggtb       | PROMOTER               | 0.598                                                        | 0.434                          | 1389.17            | 602.76             | 0.260                          | 1050.59            | 272.66             |
| A_68_P26809521 | chr9:107457493-107457537                          | NM_019713:528           | Rassf1        | INSIDE                 | 0.598                                                        | 0.495                          | 1189.45            | 588.53             | 0.296                          | 931.76             | 275.71             |
| A_68_P23820628 | chr5:77694649-77694693                            | NM_011263:152           | Rest          | INSIDE                 | 0.598                                                        | 0.528                          | 1795.51            | 947.91             | 0.316                          | 1573.14            | 496.55             |
| A_68_P27985547 | chr11:85647100-85647150                           | NM_009324:1008          | Tbx2          | INSIDE                 | 0.598                                                        | 2.876                          | 710.64             | 2044.07            | 1.719                          | 539.30             | 926.94             |
| A_68_P31006134 | chr17:3557457-3557501                             | NM_146074:235           | Tfb1m         | INSIDE                 | 0.598                                                        | 0.658                          | 2450.16            | 1611.56            | 0.393                          | 1941.65            | 763.90             |
| A_68_P29064233 | chr13:56989277-56989325                           | NM_012035:7649          | Trpc7         | INSIDE                 | 0.598                                                        | 3.530                          | 1275.13            | 4500.65            | 2.110                          | 856.97             | 1807.91            |
| A_68_P29560592 | chr14:41780099-41780143                           | NM_145928:-24           | Tspan14       | PROMOTER               | 0.598                                                        | 0.567                          | 1621.41            | 918.61             | 0.339                          | 1295.42            | 438.68             |
| A_68_P26801828 | chr9:106105584-106105628                          | NM_011876:168           | Twf2          | INSIDE                 | 0.598                                                        | 0.689                          | 1170.24            | 806.50             | 0.412                          | 1168.39            | 481.73             |
| A_68_P23996380 | chr5:113567336-113567380                          | NM_172884:24975         | 2900026A02Rik | INSIDE                 | 0.597                                                        | 0.491                          | 1434.83            | 705.15             | 0.293                          | 1109.33            | 325.36             |
| A_68_P27910207 | chr11:72028699-72028750                           | NM_001163728:85         | 4930563E22Rik | INSIDE                 | 0.597                                                        | 0.520                          | 1367.10            | 711.38             | 0.310                          | 1077.14            | 334.38             |
| A_68_P28752832 | chr12:114067540-114067584                         | NM_028023:38            | Cdca4         | INSIDE                 | 0.597                                                        | 0.529                          | 3303.95            | 1748.13            | 0.316                          | 2474.00            | 781.15             |
| A_68_P25471450 | chr7:128125237-128125281                          | NM_007672:568           | Cdr2          | INSIDE                 | 0.597                                                        | 0.664                          | 1492.75            | 990.68             | 0.396                          | 1161.96            | 460.64             |
| A_68_P25948535 | chr8:72413120-72413164                            | NM_026818:-1851         | Cilp2         | PROMOTER               | 0.597                                                        | 0.479                          | 1235.17            | 591.11             | 0.286                          | 957.46             | 273.46             |
| A_68_P21629316 | chr2:130187590-130187634                          | NM_00110513:65938       | Ebf4          | INSIDE                 | 0.597                                                        | 0.645                          | 2161.58            | 1394.12            | 0.385                          | 1725.52            | 664.14             |
| A_68_P28470864 | chr12:60320947-60320991                           | NM_001033156:-498       | Fbxo33        | PROMOTER               | 0.597                                                        | 0.493                          | 1475.94            | 727.36             | 0.294                          | 1217.60            | 358.41             |
| A_68_P28604396 | chr12:86827240-86827284                           | NM_010234:12412         | Fos           | DOWNSTREAM             | 0.597                                                        | 0.620                          | 1083.29            | 671.61             | 0.370                          | 897.62             | 332.01             |
| A_68_P26375211 | chr9:27107465-27107509                            | NM_001033323:674        | IgSF9b        | INSIDE                 | 0.597                                                        | 0.520                          | 2186.28            | 1137.52            | 0.310                          | 1657.82            | 514.59             |
| A_68_P27543981 | chr10:128370721-128370765                         | NM_008398:-126          | Igfa7         | PROMOTER               | 0.597                                                        | 0.515                          | 1877.83            | 966.34             | 0.307                          | 1326.14            | 407.68             |
| A_68_P27924619 | chr11:74986101-74986145                           | NR_029794:-767          | Mir212        | DIVERGENT_PROMOTER     | 0.597                                                        | 0.582                          | 3777.86            | 2199.81            | 0.348                          | 2972.84            | 1033.89            |
| A_68_P24191782 | chr5:151396383-151396427                          | NM_133898:696           | N4bp211       | INSIDE                 | 0.597                                                        | 0.551                          | 1231.69            | 678.95             | 0.329                          | 1028.45            | 338.20             |
| A_68_P27290092 | chr10:80958931-80958975                           | NM_134009:156           | Neln          | INSIDE                 | 0.597                                                        | 0.544                          | 3936.53            | 2141.26            | 0.325                          | 2844.15            | 923.92             |
| A_68_P31866297 | chr18:80904269-80904314                           | NM_00116411:621         | Nfate1        | INSIDE                 | 0.597                                                        | 0.618                          | 1196.16            | 738.86             | 0.369                          | 1035.19            | 381.56             |
| A_68_P30000041 | chr15:8393675-8393723                             | NM_027707:765           | Nipbl         | INSIDE                 | 0.597                                                        | 0.572                          | 1360.81            | 777.79             | 0.341                          | 1211.29            | 413.04             |
| A_68_P31140479 | chr17:31701231-31701275                           | NM_016670:-465          | Pknox1        | PROMOTER               | 0.597                                                        | 0.542                          | 1130.48            | 613.27             | 0.324                          | 828.28             | 268.31             |
| A_68_P23407014 | chr4:149944046-149944090                          | NM_001085492:288044     | Rere          | INSIDE                 | 0.597                                                        | 0.590                          | 2454.17            | 1448.36            | 0.352                          | 1861.77            | 655.57             |
| A_68_P21912147 | chr2:181428245-181428289                          | NM_026446:363           | Rgs19         | INSIDE                 | 0.597                                                        | 0.587                          | 1635.67            | 959.55             | 0.350                          | 1612.89            | 565.09             |
| A_68_P26596750 | chr9:66896100-66896144                            | NM_001164252:-4444      | Tpm1          | PROMOTER               | 0.597                                                        | 0.443                          | 1696.14            | 752.00             | 0.264                          | 1218.54            | 322.29             |
| A_68_P25089670 | chr7:52105704-52105748                            | NM_026270:1130          | Akt1s1        | INSIDE                 | 0.596                                                        | 0.546                          | 998.05             | 545.25             | 0.325                          | 857.57             | 279.07             |
| A_68_P24759116 | chr6:113328203-113328247                          | NM_001170485:118        | Arpc4         | INSIDE                 | 0.596                                                        | 0.626                          | 924.00             | 578.23             | 0.373                          | 765.03             | 285.30             |

| ProbeName      | Target position of probe on CpG island microarray | TargetID           | GeneSymbol    | CpG island Description | Ratio of relative methylation (TiO <sub>2</sub> -NP/Vehicle) | Sham group                     |                    |                    | TiO <sub>2</sub> -H group      |                    |                    |
|----------------|---------------------------------------------------|--------------------|---------------|------------------------|--------------------------------------------------------------|--------------------------------|--------------------|--------------------|--------------------------------|--------------------|--------------------|
|                |                                                   |                    |               |                        |                                                              | Relative methylation (Cy5/Cy3) | Cy3 signal (Input) | Cy5 signal (MeDIP) | Relative methylation (Cy5/Cy3) | Cy3 signal (Input) | Cy5 signal (MeDIP) |
| A_68_P27278868 | chr10:79240243-79240287                           | NM_031380:246      | Fstl3         | INSIDE                 | 0.596                                                        | 2.279                          | 5870.34            | 13380.16           | 1.358                          | 3783.22            | 5138.65            |
| A_68_P20193920 | chr1:44608775-44608819                            | NM_028450:281      | Gulp1         | INSIDE                 | 0.596                                                        | 0.647                          | 1750.20            | 1133.25            | 0.386                          | 1417.05            | 547.02             |
| A_68_P29613101 | chr14:55196302-55196346                           | NM_010590:174      | Jub           | INSIDE                 | 0.596                                                        | 0.558                          | 3510.28            | 1958.95            | 0.333                          | 2838.90            | 944.66             |
| A_68_P25598743 | chr7:150293354-150293398                          | NM_008434:218      | Kenq1         | INSIDE                 | 0.596                                                        | 0.717                          | 1531.70            | 1098.05            | 0.427                          | 1262.71            | 539.38             |
| A_68_P23842572 | chr5:82223907-82223953                            | NM_198702:773313   | Lphn3         | INSIDE                 | 0.596                                                        | 2.820                          | 711.71             | 2007.26            | 1.681                          | 568.12             | 954.97             |
| A_68_P25576399 | chr7:146398944-146398988                          | NM_001143755-207   | Lrre27        | PROMOTER               | 0.596                                                        | 0.649                          | 991.03             | 643.50             | 0.387                          | 789.55             | 305.75             |
| A_68_P29330296 | chr13:112515544-112515588                         | NM_172593:39181    | Mier3         | DOWNSTREAM             | 0.596                                                        | 0.394                          | 1640.41            | 646.06             | 0.235                          | 1309.51            | 307.46             |
| A_68_P22856642 | chr4:40226159-40226203                            | NM_001033305:221   | Ndufb6        | INSIDE                 | 0.596                                                        | 0.436                          | 2086.76            | 910.02             | 0.260                          | 1462.95            | 380.38             |
| A_68_P20413386 | chr1:88567063-88567107                            | NM_010933:64       | Nppe          | INSIDE                 | 0.596                                                        | 0.569                          | 1056.02            | 600.65             | 0.339                          | 904.77             | 306.88             |
| A_68_P23374051 | chr4:142802693-142802737                          | NM_001081355-102   | Prdm2         | PROMOTER               | 0.596                                                        | 0.531                          | 1841.54            | 977.22             | 0.316                          | 1580.36            | 499.43             |
| A_68_P29703310 | chr14:71165976-71166021                           | NM_023045:437      | Xpo7          | INSIDE                 | 0.596                                                        | 0.516                          | 1046.55            | 540.47             | 0.308                          | 816.33             | 251.35             |
| A_68_P22129250 | chr3:51162734-51162778                            |                    |               | Unknown                | 0.596                                                        | 0.561                          | 2229.30            | 1251.07            | 0.335                          | 1913.56            | 640.43             |
| A_68_P31961132 | chr19:12575516-12575560                           | NM_172442:948      | Dtx4          | INSIDE                 | 0.595                                                        | 0.611                          | 1741.39            | 1064.59            | 0.364                          | 1392.13            | 506.25             |
| A_68_P32397420 | chrX:53985031-53985075                            | NM_001077361-81    | Fhl1          | PROMOTER               | 0.595                                                        | 2.929                          | 2221.21            | 6506.14            | 1.743                          | 1013.79            | 1767.47            |
| A_68_P25715599 | chr8:24348136-24348180                            | NM_024240-18       | Gins4         | PROMOTER               | 0.595                                                        | 0.634                          | 1208.93            | 765.98             | 0.377                          | 871.37             | 328.63             |
| A_68_P31117100 | chr17:27692460-27692504                           | NM_001025427-1036  | Hmga1         | PROMOTER               | 0.595                                                        | 0.692                          | 1553.21            | 1074.37            | 0.412                          | 1403.69            | 577.94             |
| A_68_P27572319 | chr11:7114101-7114145                             | NM_008343-196      | Igfbp3        | PROMOTER               | 0.595                                                        | 0.390                          | 1367.48            | 533.25             | 0.232                          | 1066.04            | 247.33             |
| A_68_P30130467 | chr15:34767012-34767056                           | NM_181317-101      | Kens2         | PROMOTER               | 0.595                                                        | 0.588                          | 992.19             | 583.30             | 0.350                          | 860.67             | 301.10             |
| A_68_P24114755 | chr5:135583039-135583083                          | NM_021455:278      | Mlxip1        | INSIDE                 | 0.595                                                        | 0.605                          | 1122.30            | 678.59             | 0.360                          | 990.96             | 356.51             |
| A_68_P22752527 | chr4:15885475-15885519                            | NM_013752:383      | Nbn           | INSIDE                 | 0.595                                                        | 0.493                          | 1053.71            | 519.57             | 0.293                          | 793.14             | 232.50             |
| A_68_P21151183 | chr2:38781338-38781382                            | NM_010264:621      | Nr6a1         | INSIDE                 | 0.595                                                        | 0.691                          | 2248.49            | 1553.46            | 0.411                          | 1773.06            | 729.37             |
| A_68_P28802625 | chr13:6547192-6547238                             | NM_145131-188      | Pitrm1        | PROMOTER               | 0.595                                                        | 2.377                          | 6069.01            | 14426.27           | 1.415                          | 3902.82            | 5521.78            |
| A_68_P23233548 | chr4:116977181-116977225                          | NM_025739:192318   | Rnf220        | INSIDE                 | 0.595                                                        | 2.418                          | 2800.74            | 6770.84            | 1.437                          | 1868.70            | 2685.92            |
| A_68_P21747680 | chr2:151931345-151931389                          | NM_029688-99       | Srxn1         | PROMOTER               | 0.595                                                        | 0.646                          | 2846.43            | 1838.72            | 0.385                          | 2308.07            | 887.70             |
| A_68_P30580616 | chr16:18588788-18588832                           | NM_011532-1748     | Tbx1          | PROMOTER               | 0.595                                                        | 0.415                          | 1778.89            | 738.00             | 0.247                          | 1371.09            | 338.49             |
| A_68_P26152538 | chr8:111238302-111238346                          | NM_007496-219      | Zfx3          | PROMOTER               | 0.595                                                        | 0.679                          | 1081.35            | 734.45             | 0.404                          | 944.21             | 381.59             |
| A_68_P30339073 | chr15:74539555-74539599                           | NR_033197-14       | 4933427E11Rik | PROMOTER               | 0.594                                                        | 0.475                          | 1781.36            | 846.98             | 0.282                          | 1168.47            | 329.98             |
| A_68_P24455810 | chr6:53238161-53238205                            | NR_015553:894      | 9430076C15Rik | INSIDE                 | 0.594                                                        | 0.428                          | 1853.46            | 793.26             | 0.254                          | 1447.77            | 367.84             |
| A_68_P23260768 | chr4:122782372-122782416                          | NM_007559-13       | Bmp8b         | PROMOTER               | 0.594                                                        | 0.539                          | 1363.52            | 735.06             | 0.320                          | 1135.02            | 363.35             |
| A_68_P32139835 | chr19:45734791-45734835                           | NM_013907-129      | Fbxw4         | PROMOTER               | 0.594                                                        | 0.573                          | 1068.08            | 612.45             | 0.341                          | 896.83             | 305.64             |
| A_68_P23222200 | chr4:114574734-114574778                          | NM_008593:6747     | Foxd2         | DOWNSTREAM             | 0.594                                                        | 0.415                          | 1753.67            | 727.13             | 0.246                          | 1345.87            | 331.71             |
| A_68_P23785052 | chr5:71487399-71487443                            | NM_008066-332      | Gabra2        | PROMOTER               | 0.594                                                        | 0.547                          | 1099.64            | 601.65             | 0.325                          | 861.42             | 279.79             |
| A_68_P25095548 | chr7:53121361-53121405                            | NM_008172:669      | Grin2d        | INSIDE                 | 0.594                                                        | 0.662                          | 1402.91            | 929.37             | 0.394                          | 1222.04            | 480.94             |
| A_68_P27806467 | chr11:53584134-53584178                           | NM_001159396:182   | Irf1          | INSIDE                 | 0.594                                                        | 0.577                          | 2049.85            | 1182.05            | 0.343                          | 1649.48            | 565.15             |
| A_68_P24003591 | chr5:114830465-114830509                          | NM_001159941:28    | Ketd10        | INSIDE                 | 0.594                                                        | 0.449                          | 1952.45            | 876.19             | 0.267                          | 1600.68            | 426.94             |
| A_68_P24993121 | chr7:19989091-19989135                            | NM_146182-3907     | Klc3          | DIVERGENT_PROMOTER     | 0.594                                                        | 0.435                          | 1409.77            | 612.81             | 0.258                          | 1126.58            | 291.00             |
| A_68_P31934666 | chr19:6428995-6429039                             | NM_001205234:10279 | Nrxn2         | INSIDE                 | 0.594                                                        | 2.293                          | 5391.29            | 12362.88           | 1.363                          | 3511.12            | 4786.12            |
| A_68_P31774689 | chr18:64500435-64500479                           | NM_194268:439      | Onecut2       | INSIDE                 | 0.594                                                        | 0.667                          | 3296.23            | 2200.05            | 0.396                          | 2371.46            | 940.06             |
| A_68_P30346620 | chr15:76012400-76012444                           | NM_201394:13718    | Plec          | INSIDE                 | 0.594                                                        | 2.759                          | 550.95             | 1520.08            | 1.640                          | 466.16             | 764.39             |
| A_68_P27921006 | chr11:74335943-74335987                           | NM_001015046:67696 | Rap1gap2      | INSIDE                 | 0.594                                                        | 0.532                          | 2306.35            | 1226.08            | 0.316                          | 1703.70            | 538.42             |
| A_68_P31097159 | chr17:24551794-24551838                           | NM_001080127:197   | Rnps1         | INSIDE                 | 0.594                                                        | 0.663                          | 1629.48            | 1080.65            | 0.394                          | 1406.48            | 553.71             |
| A_68_P31926384 | chr19:5024260-5024304                             | NM_007854:277      | Slc29a2       | INSIDE                 | 0.594                                                        | 0.524                          | 1656.91            | 868.73             | 0.312                          | 1423.90            | 443.74             |
| A_68_P20346581 | chr1:74115086-74115133                            | NM_027884:55912    | Tns1          | INSIDE                 | 0.594                                                        | 0.542                          | 1191.98            | 645.89             | 0.322                          | 865.66             | 278.39             |
| A_68_P23394410 | chr4:147818444-147818488                          | NM_027873:394      | Ubiad1        | INSIDE                 | 0.594                                                        | 0.710                          | 1967.05            | 1395.74            | 0.421                          | 1672.34            | 704.34             |
| A_68_P24091295 | chr5:130418466-130418510                          | NM_001001327:506   | Vkore1l1      | INSIDE                 | 0.594                                                        | 0.448                          | 1611.24            | 721.77             | 0.266                          | 1259.09            | 334.89             |
| A_68_P23059228 | chr4:82505265-82505309                            | NM_026647:279      | Zdhc21        | INSIDE                 | 0.594                                                        | 0.362                          | 1506.93            | 545.23             | 0.215                          | 1274.73            | 273.96             |
| A_68_P26199699 | chr8:119445245-119445289                          | NM_026844:70       | 2310061C15Rik | INSIDE                 | 0.593                                                        | 0.631                          | 1993.24            | 1257.71            | 0.374                          | 1502.66            | 561.86             |
| A_68_P26476278 | chr9:45646743-45646787                            | NM_001145947:153   | Bace1         | INSIDE                 | 0.593                                                        | 0.651                          | 1643.77            | 1069.63            | 0.386                          | 1365.52            | 527.25             |
| A_68_P26486124 | chr9:47338813-47338857                            | NM_001025600:400   | Cadm1         | INSIDE                 | 0.593                                                        | 0.689                          | 1720.45            | 1185.19            | 0.409                          | 1558.50            | 637.17             |
| A_68_P21628998 | chr2:130120631-130120675                          | NM_001110513-1022  | Ebf4          | PROMOTER               | 0.593                                                        | 0.714                          | 2592.44            | 1850.61            | 0.423                          | 1876.95            | 794.32             |
| A_68_P20938885 | chr1:193399879-193399925                          | NM_178632:290      | Ints7         | INSIDE                 | 0.593                                                        | 0.450                          | 1340.38            | 603.72             | 0.267                          | 1058.05            | 282.71             |

| ProbeName      | Target position of probe on CpG island microarray | TargetID               | GeneSymbol | CpG island Description | Ratio of relative methylation (TiO <sub>2</sub> -NP/Vehicle) | Sham group                     |                    |                    | TiO <sub>2</sub> -H group      |                    |                    |
|----------------|---------------------------------------------------|------------------------|------------|------------------------|--------------------------------------------------------------|--------------------------------|--------------------|--------------------|--------------------------------|--------------------|--------------------|
|                |                                                   |                        |            |                        |                                                              | Relative methylation (Cy5/Cy3) | Cy3 signal (Input) | Cy5 signal (MeDIP) | Relative methylation (Cy5/Cy3) | Cy3 signal (Input) | Cy5 signal (MeDIP) |
| A_68_P27922700 | chr11:74645583-74645627                           | NM_010813:1179         | Mnt        | INSIDE                 | 0.593                                                        | 0.482                          | 1154.05            | 556.61             | 0.286                          | 1009.08            | 288.46             |
| A_68_P24932173 | chr6:146991217-146991261                          | NM_145573:-53          | Mrps35     | PROMOTER               | 0.593                                                        | 0.358                          | 1804.95            | 645.93             | 0.212                          | 1586.10            | 336.34             |
| A_68_P21842414 | chr2:168415753-168415797                          | NM_001136073:-83       | Nfate2     | PROMOTER               | 0.593                                                        | 0.657                          | 2148.69            | 1411.51            | 0.390                          | 1208.10            | 470.89             |
| A_68_P30474567 | chr15:98268138-98268187                           | NM_146457:262          | Olf282     | INSIDE                 | 0.593                                                        | 3.048                          | 743.38             | 2265.76            | 1.809                          | 609.24             | 1101.89            |
| A_68_P29699779 | chr14:70576599-70576643                           | NM_145978:859          | Pdlim2     | INSIDE                 | 0.593                                                        | 0.557                          | 3028.68            | 1686.77            | 0.330                          | 2376.19            | 784.84             |
| A_68_P30344972 | chr15:75751799-75751843                           | NM_025412:170          | Pyrl1      | INSIDE                 | 0.593                                                        | 0.610                          | 1528.07            | 932.19             | 0.362                          | 1219.50            | 441.14             |
| A_68_P30496838 | chr15:102077585-102077629                         | NM_001042727:-823      | Rarg       | PROMOTER               | 0.593                                                        | 0.414                          | 1630.74            | 674.50             | 0.245                          | 1351.07            | 331.20             |
| A_68_P28159196 | chr11:116273617-116273661                         | NM_027258:708          | Rnf157     | INSIDE                 | 0.593                                                        | 0.710                          | 1436.28            | 1019.53            | 0.421                          | 1107.91            | 466.62             |
| A_68_P28051299 | chr11:97413226-97413270                           | NM_018873:23192        | Srcin1     | INSIDE                 | 0.593                                                        | 0.608                          | 889.92             | 541.50             | 0.361                          | 809.41             | 291.86             |
| A_68_P25232272 | chr7:81159033-81159078                            | NM_009181:-487         | St8sia2    | PROMOTER               | 0.593                                                        | 0.522                          | 3343.28            | 1744.06            | 0.310                          | 2614.63            | 809.38             |
| A_68_P23962876 | chr5:107125079-107125123                          | NM_026856:749          | Zfp644     | INSIDE                 | 0.593                                                        | 0.299                          | 2493.51            | 746.29             | 0.178                          | 2052.64            | 364.35             |
| A_68_P24058184 | chr5:124357527-124357571                          | NM_026603:265          | Denr       | INSIDE                 | 0.592                                                        | 0.638                          | 1275.27            | 813.70             | 0.377                          | 1045.85            | 394.79             |
| A_68_P21425684 | chr2:91803378-91803422                            | NM_138306:320          | Dgkz       | INSIDE                 | 0.592                                                        | 0.472                          | 1509.86            | 713.20             | 0.280                          | 1290.92            | 361.18             |
| A_68_P25093408 | chr7:52744206-52744250                            | NM_027903:-62          | Dhdh       | PROMOTER               | 0.592                                                        | 0.591                          | 1981.28            | 1171.77            | 0.350                          | 1605.28            | 562.44             |
| A_68_P30672035 | chr16:35769023-35769067                           | NM_153550:398          | Dir2       | INSIDE                 | 0.592                                                        | 0.411                          | 1741.59            | 714.97             | 0.243                          | 1510.92            | 367.51             |
| A_68_P25026465 | chr7:30089302-30089346                            | NM_013874:301          | Dpfl       | INSIDE                 | 0.592                                                        | 0.682                          | 1670.30            | 1139.36            | 0.404                          | 1139.36            | 512.71             |
| A_68_P32143269 | chr19:46402678-46402722                           | NM_133694:27           | Fbx115     | INSIDE                 | 0.592                                                        | 0.569                          | 950.84             | 541.30             | 0.337                          | 834.76             | 281.20             |
| A_68_P28377242 | chr12:40949783-40949827                           | NM_013562:-28          | lfrd1      | PROMOTER               | 0.592                                                        | 0.410                          | 2672.45            | 1096.43            | 0.243                          | 1962.72            | 476.90             |
| A_68_P27453320 | chr10:111709075-111709123                         | NM_001025581:920       | Kenc2      | INSIDE                 | 0.592                                                        | 0.552                          | 990.86             | 547.40             | 0.327                          | 709.97             | 232.23             |
| A_68_P21147691 | chr2:38212503-38212547                            | NM_010710:5697         | Lhx2       | INSIDE                 | 0.592                                                        | 0.527                          | 1144.24            | 602.93             | 0.312                          | 948.15             | 295.77             |
| A_68_P25257803 | chr7:86027612-86027656                            | NR_029826:-5528        | Mir7-2     | PROMOTER               | 0.592                                                        | 0.595                          | 1051.81            | 625.68             | 0.352                          | 837.58             | 294.80             |
| A_68_P27674921 | chr11:29426434-29426478                           | NM_133767:0            | Mif2       | INSIDE                 | 0.592                                                        | 0.496                          | 1979.73            | 981.54             | 0.293                          | 1667.20            | 489.31             |
| A_68_P26345850 | chr9:20988460-20988504                            | NM_183408:18325        | Pde4a      | INSIDE                 | 0.592                                                        | 0.536                          | 1152.31            | 617.18             | 0.317                          | 1038.81            | 329.58             |
| A_68_P31067774 | chr17:15967950-15967994                           | NM_178615:-4422        | Rgmb       | PROMOTER               | 0.592                                                        | 0.579                          | 2910.60            | 1684.44            | 0.342                          | 2239.36            | 766.97             |
| A_68_P22388655 | chr3:103718078-103718124                          | NM_172684:58           | Rsb1       | INSIDE                 | 0.592                                                        | 0.308                          | 1704.85            | 525.40             | 0.183                          | 1451.51            | 264.92             |
| A_68_P29448257 | chr14:21493552-21493596                           | NM_001168273:32        | Sec24c     | INSIDE                 | 0.592                                                        | 0.524                          | 1383.50            | 725.40             | 0.310                          | 1162.57            | 360.68             |
| A_68_P28931376 | chr13:32893858-32893902                           | NM_030215:-18          | Wrnip1     | PROMOTER               | 0.592                                                        | 0.442                          | 1884.77            | 833.81             | 0.262                          | 1466.74            | 384.43             |
| A_68_P23586719 | chr5:33362030-33362074                            | NM_011738:588          | Ywhah      | INSIDE                 | 0.592                                                        | 0.440                          | 1903.90            | 837.08             | 0.260                          | 1523.40            | 396.55             |
| A_68_P22510975 | chr3:127540105-127540149                          | NM_145964:284          | Ap1ar      | INSIDE                 | 0.591                                                        | 0.647                          | 1969.64            | 1275.09            | 0.383                          | 1545.85            | 591.83             |
| A_68_P26764915 | chr9:99469261-99469305                            | NM_028768:36           | Armc8      | INSIDE                 | 0.591                                                        | 0.507                          | 1275.98            | 647.07             | 0.300                          | 944.09             | 283.19             |
| A_68_P30404227 | chr15:85809018-85809063                           | NM_009886:55167        | Celsr1     | INSIDE                 | 0.591                                                        | 2.968                          | 311.14             | 923.41             | 1.755                          | 375.22             | 658.46             |
| A_68_P24058179 | chr5:124357031-124357075                          | NM_026603:-231         | Denr       | PROMOTER               | 0.591                                                        | 0.439                          | 2534.45            | 1111.70            | 0.259                          | 2046.88            | 530.57             |
| A_68_P20558185 | chr1:121545078-121545122                          | NM_145506:477          | Epb4.115   | INSIDE                 | 0.591                                                        | 0.534                          | 1283.66            | 686.03             | 0.316                          | 1047.29            | 330.86             |
| A_68_P31207969 | chr17:46765813-46765857                           | NM_175168:619          | Ptk7       | INSIDE                 | 0.591                                                        | 0.685                          | 1632.20            | 1117.64            | 0.405                          | 1424.66            | 576.74             |
| A_68_P25425954 | chr7:119822563-119822607                          | NM_001166584:-249      | Tead1      | PROMOTER               | 0.591                                                        | 0.696                          | 1116.05            | 776.37             | 0.411                          | 827.84             | 340.06             |
| A_68_P23970433 | chr5:108561687-108561731                          | NM_028876:-98          | Tmed5      | DIVERGENT_PROMOTER     | 0.591                                                        | 0.563                          | 1286.53            | 724.64             | 0.333                          | 1064.53            | 354.31             |
| A_68_P22872184 | chr4:43536297-43536341                            | NM_009416:-58          | Tpm2       | PROMOTER               | 0.591                                                        | 0.647                          | 1978.44            | 1279.19            | 0.382                          | 1525.80            | 582.66             |
| A_68_P27926185 | chr11:75268208-75268252                           | NM_138950:-11          | Wdr81      | DIVERGENT_PROMOTER     | 0.591                                                        | 0.590                          | 998.65             | 589.12             | 0.349                          | 725.60             | 252.95             |
| A_68_P23318625 | chr4:133189081-133189125                          | NM_001017968:242       | Zdhhc18    | INSIDE                 | 0.591                                                        | 0.727                          | 1867.74            | 1358.58            | 0.430                          | 1424.77            | 612.52             |
| A_68_P32217859 | chr19:59268751-59268795                           |                        | Unknown    |                        | 0.591                                                        | 0.692                          | 1552.77            | 1074.21            | 0.409                          | 1214.18            | 496.59             |
| A_68_P25007551 | chr7:25740203-25740247                            |                        | Unknown    |                        | 0.591                                                        | 0.501                          | 2713.42            | 1358.79            | 0.296                          | 2068.17            | 612.20             |
| A_68_P23817352 | chr5:77087407-77087451                            | ENSMUST00000125922:683 |            | INSIDE                 | 0.591                                                        | 0.646                          | 1029.33            | 664.65             | 0.382                          | 900.77             | 343.76             |
| A_68_P25415073 | chr7:117912172-117912216                          | NM_009667:-3923        | Ampd3      | PROMOTER               | 0.590                                                        | 0.708                          | 1292.80            | 915.88             | 0.418                          | 1120.65            | 468.80             |
| A_68_P27228313 | chr10:69652213-69652261                           | NM_001111121:92368     | Cecdc6     | INSIDE                 | 0.590                                                        | 3.830                          | 1022.68            | 3916.45            | 2.259                          | 799.74             | 1807.01            |
| A_68_P23202007 | chr4:109339070-109339115                          | NM_007671:-1115        | Cdkn2c     | PROMOTER               | 0.590                                                        | 0.689                          | 1117.88            | 770.49             | 0.407                          | 936.38             | 380.95             |
| A_68_P25592946 | chr7:149281230-149281274                          | NM_008748:-63          | Dusp8      | PROMOTER               | 0.590                                                        | 0.457                          | 2086.08            | 952.95             | 0.269                          | 1690.04            | 455.17             |
| A_68_P26878190 | chr9:120401831-120401875                          | NM_026892:129          | Eif1b      | INSIDE                 | 0.590                                                        | 0.643                          | 2200.97            | 1414.61            | 0.379                          | 1671.60            | 634.25             |
| A_68_P23561108 | chr5:28492702-28492746                            | NM_010134:489          | En2        | INSIDE                 | 0.590                                                        | 0.582                          | 1171.21            | 681.86             | 0.344                          | 1050.16            | 360.88             |
| A_68_P31624334 | chr18:36675661-36675705                           | NM_010415:-223         | Hbegf      | PROMOTER               | 0.590                                                        | 0.491                          | 2047.62            | 1006.16            | 0.290                          | 1646.99            | 477.39             |
| A_68_P21840415 | chr2:168094408-168094454                          | NM_001081134:401       | Keng1      | INSIDE                 | 0.590                                                        | 4.346                          | 2995.93            | 13019.33           | 2.564                          | 1963.66            | 5034.52            |
| A_68_P27838142 | chr11:59475681-59475726                           | NM_012027:-293         | Mprp       | PROMOTER               | 0.590                                                        | 0.489                          | 2725.32            | 1333.89            | 0.289                          | 2117.86            | 611.96             |

| ProbeName      | Target position of probe on CpG island microarray | TargetID           | GeneSymbol    | CpG island Description | Ratio of relative methylation (TiO <sub>2</sub> -NP/Vehicle) | Sham group                     |                    |                    | TiO <sub>2</sub> -H group      |                    |                    |
|----------------|---------------------------------------------------|--------------------|---------------|------------------------|--------------------------------------------------------------|--------------------------------|--------------------|--------------------|--------------------------------|--------------------|--------------------|
|                |                                                   |                    |               |                        |                                                              | Relative methylation (Cy5/Cy3) | Cy3 signal (Input) | Cy5 signal (MeDIP) | Relative methylation (Cy5/Cy3) | Cy3 signal (Input) | Cy5 signal (MeDIP) |
| A_68_P29694907 | chr14:69808925-69808969                           | NM_010921:198      | Nkx3-1        | INSIDE                 | 0.590                                                        | 0.638                          | 1546.71            | 986.36             | 0.376                          | 1204.94            | 453.06             |
| A_68_P22593191 | chr3:142545216-142545260                          | NM_178654:-270     | Pkn2          | PROMOTER               | 0.590                                                        | 0.365                          | 1598.84            | 582.80             | 0.215                          | 1338.37            | 287.70             |
| A_68_P30477113 | chr15:98711795-98711839                           | NM_026967:29       | Rheb11        | INSIDE                 | 0.590                                                        | 0.638                          | 2410.21            | 1538.84            | 0.376                          | 1874.16            | 705.52             |
| A_68_P20250374 | chr1:57026684-57026728                            | NM_139146:1472     | Sath2         | INSIDE                 | 0.590                                                        | 0.551                          | 962.45             | 530.59             | 0.325                          | 833.78             | 271.05             |
| A_68_P22169678 | chr3:58496243-58496287                            | NM_009174:46       | Siah2         | INSIDE                 | 0.590                                                        | 0.678                          | 1708.09            | 1158.64            | 0.400                          | 1488.06            | 595.39             |
| A_68_P24951727 | chr7:4990151-4990195                              | NM_001039532:-124  | Zfp784        | PROMOTER               | 0.590                                                        | 0.495                          | 1695.96            | 839.82             | 0.292                          | 1174.83            | 343.22             |
| A_68_P21040880 | chr2:18610461-18610505                            | NM_007552:11838    | Bmi1          | DOWNSTREAM             | 0.589                                                        | 0.633                          | 1224.93            | 775.07             | 0.373                          | 1105.97            | 412.53             |
| A_68_P28071735 | chr11:100931508-100931552                         | NM_013792:123      | Naglu         | INSIDE                 | 0.589                                                        | 0.655                          | 3157.25            | 2067.87            | 0.386                          | 2575.22            | 993.59             |
| A_68_P25343523 | chr7:103360337-103360381                          | NM_011858:1212     | Odz4          | INSIDE                 | 0.589                                                        | 0.648                          | 1218.86            | 789.75             | 0.382                          | 970.32             | 370.61             |
| A_68_P23271482 | chr4:124664450-124664494                          | NM_138683:799      | Rspo1         | INSIDE                 | 0.589                                                        | 0.534                          | 1364.90            | 729.21             | 0.314                          | 1093.02            | 343.75             |
| A_68_P21099540 | chr2:29658503-29658547                            | NM_011989:325      | Slc27a4       | INSIDE                 | 0.589                                                        | 0.635                          | 2505.89            | 1590.11            | 0.374                          | 2038.73            | 761.84             |
| A_68_P27844726 | chr11:60591168-60591212                           | NM_175491:164      | Smcr8         | INSIDE                 | 0.589                                                        | 0.522                          | 1251.94            | 653.71             | 0.308                          | 882.45             | 271.43             |
| A_68_P28055911 | chr11:98219606-98219650                           | NM_021547:-69      | Stard3        | PROMOTER               | 0.589                                                        | 0.669                          | 1966.85            | 1314.93            | 0.394                          | 1854.60            | 730.57             |
| A_68_P20156312 | chr1:37921635-37921679                            | NM_207228:268      | Tsga10        | INSIDE                 | 0.589                                                        | 0.734                          | 2196.50            | 1611.88            | 0.432                          | 1827.78            | 789.63             |
| A_68_P23340749 | chr4:137150280-137150324                          | NM_130879:199      | Usp48         | INSIDE                 | 0.589                                                        | 0.550                          | 1095.82            | 602.36             | 0.324                          | 964.16             | 312.11             |
| A_68_P20433089 | chr1:91838165-91838209                            | AK051578:11351     |               | DOWNSTREAM             | 0.589                                                        | 0.737                          | 2162.14            | 1593.01            | 0.434                          | 1701.73            | 738.74             |
| A_68_P28448909 | chr12:55757202-55757246                           | NM_134054:335      | 1110002B05Rik | INSIDE                 | 0.588                                                        | 0.474                          | 2137.50            | 1012.68            | 0.279                          | 1647.80            | 459.13             |
| A_68_P28073762 | chr11:101278541-101278585                         | NM_144829:185      | Aarsd1        | INSIDE                 | 0.588                                                        | 0.663                          | 2841.75            | 1882.70            | 0.389                          | 2252.20            | 876.80             |
| A_68_P28574815 | chr12:81360407-81360451                           | NM_134156:930      | Actn1         | INSIDE                 | 0.588                                                        | 0.558                          | 1566.46            | 874.72             | 0.328                          | 1291.53            | 423.94             |
| A_68_P21071034 | chr2:25127984-25128028                            | NM_175300:21       | Anapc2        | INSIDE                 | 0.588                                                        | 0.520                          | 1814.36            | 943.09             | 0.305                          | 1493.07            | 456.13             |
| A_68_P30579427 | chr16:18392999-18393043                           | NM_033474:44654    | Arvef         | INSIDE                 | 0.588                                                        | 0.577                          | 1495.70            | 862.72             | 0.339                          | 1055.92            | 357.93             |
| A_68_P28596936 | chr12:85534975-85535019                           | NM_001163502:-31   | C130039016Rik | PROMOTER               | 0.588                                                        | 0.587                          | 1200.40            | 704.15             | 0.345                          | 1073.45            | 370.30             |
| A_68_P29454308 | chr14:22505922-22505966                           | NM_001013826:27854 | Dupd1         | INSIDE                 | 0.588                                                        | 0.575                          | 1335.15            | 767.19             | 0.338                          | 1088.89            | 367.69             |
| A_68_P29941732 | chr14:119324506-119324550                         | NM_025943:-2139    | Dzip1         | PROMOTER               | 0.588                                                        | 0.519                          | 1763.44            | 915.93             | 0.306                          | 1422.85            | 434.86             |
| A_68_P27281570 | chr10:79649434-79649479                           | NM_007909:7230     | Efna2         | INSIDE                 | 0.588                                                        | 2.645                          | 5708.01            | 15096.17           | 1.556                          | 3752.70            | 5837.50            |
| A_68_P24005878 | chr5:115199611-115199670                          | NM_001077360:23860 | Git2          | INSIDE                 | 0.588                                                        | 3.829                          | 817.22             | 3129.23            | 2.252                          | 735.92             | 1657.63            |
| A_68_P24448934 | chr6:52142084-52142128                            | NM_008265:-404     | Hoxa4         | DIVERGENT_PROMOTER     | 0.588                                                        | 0.393                          | 1418.62            | 557.15             | 0.231                          | 1199.19            | 277.16             |
| A_68_P22312508 | chr3:88019276-88019320                            | NR_029817:-221     | Mir9-1        | PROMOTER               | 0.588                                                        | 0.675                          | 3063.02            | 2066.37            | 0.397                          | 2338.02            | 927.20             |
| A_68_P26983365 | chr10:19569569-19569613                           | NM_029529:1675     | Slc35d3       | INSIDE                 | 0.588                                                        | 0.572                          | 1545.29            | 883.45             | 0.336                          | 1185.10            | 398.63             |
| A_68_P22149839 | chr3:54598091-54598144                            | NM_019483:38614    | Smad9         | INSIDE                 | 0.588                                                        | 3.121                          | 567.72             | 1771.93            | 1.836                          | 545.08             | 1000.84            |
| A_68_P25670892 | chr8:13869760-13869804                            | NM_181854:142      | Zfp828        | INSIDE                 | 0.588                                                        | 0.622                          | 1248.35            | 776.91             | 0.366                          | 942.02             | 344.73             |
| A_68_P27958481 | chr11:80966909-80966953                           | NM_007384:-525     | Acen1         | PROMOTER               | 0.587                                                        | 0.530                          | 1433.96            | 760.52             | 0.311                          | 1131.20            | 352.29             |
| A_68_P32536866 | chrX:91226350-91226409                            | NR_028320:12385    | AU015836      | DOWNSTREAM             | 0.587                                                        | 3.387                          | 761.39             | 2578.65            | 1.989                          | 311.25             | 618.96             |
| A_68_P28454005 | chr12:56962212-56962256                           | NM_001037756:24882 | Brms11        | INSIDE                 | 0.587                                                        | 2.506                          | 3126.73            | 7837.02            | 1.472                          | 2390.91            | 3518.38            |
| A_68_P31613997 | chr18:34810920-34810964                           | NM_178347:448      | Cdc23         | INSIDE                 | 0.587                                                        | 0.539                          | 1317.81            | 710.65             | 0.316                          | 1280.28            | 405.10             |
| A_68_P24948002 | chr7:4103289-4103333                              | NM_021454:12991    | Cde42ep5      | INSIDE                 | 0.587                                                        | 0.550                          | 1204.32            | 662.79             | 0.323                          | 994.85             | 321.59             |
| A_68_P21070567 | chr2:25066910-25066954                            | NM_021393:77       | Cobra1        | INSIDE                 | 0.587                                                        | 0.613                          | 2930.85            | 1797.52            | 0.360                          | 2259.95            | 813.56             |
| A_68_P30476595 | chr15:98637338-98637382                           | NM_001013741:996   | Ddn           | INSIDE                 | 0.587                                                        | 0.527                          | 1055.42            | 556.17             | 0.309                          | 607.30             | 187.81             |
| A_68_P25051306 | chr7:36587684-36587728                            | NR_033567:96       | E130304102Rik | INSIDE                 | 0.587                                                        | 0.600                          | 1063.82            | 638.82             | 0.353                          | 839.10             | 295.97             |
| A_68_P21374845 | chr2:80287756-80287800                            | NM_011356:-225     | Frzb          | PROMOTER               | 0.587                                                        | 0.598                          | 1486.51            | 889.05             | 0.351                          | 1228.64            | 431.51             |
| A_68_P28156586 | chr11:115836453-115836497                         | NM_001005608:436   | Igfb4         | INSIDE                 | 0.587                                                        | 0.690                          | 1192.84            | 822.66             | 0.405                          | 1019.21            | 412.34             |
| A_68_P21077040 | chr2:26061806-26061850                            | NM_001039653:248   | Lhx3          | INSIDE                 | 0.587                                                        | 0.674                          | 1325.00            | 892.57             | 0.395                          | 1011.50            | 400.02             |
| A_68_P30504522 | chr15:103333324-103333368                         | NM_008800:-382     | Pde1b         | PROMOTER               | 0.587                                                        | 0.563                          | 5703.82            | 3213.64            | 0.331                          | 4299.93            | 1422.32            |
| A_68_P31709379 | chr18:52927884-52927928                           | NM_001199154:109   | Sncap1        | INSIDE                 | 0.587                                                        | 0.598                          | 3074.14            | 1837.96            | 0.351                          | 2558.60            | 897.60             |
| A_68_P24001332 | chr5:114443223-114443267                          | NM_198109:522      | Ssh1          | INSIDE                 | 0.587                                                        | 0.614                          | 974.48             | 598.35             | 0.360                          | 898.80             | 323.69             |
| A_68_P24974288 | chr7:13622741-13622791                            | NM_145578:561      | Ube2m         | INSIDE                 | 0.587                                                        | 3.217                          | 3408.62            | 10964.70           | 1.887                          | 2139.26            | 4036.39            |
| A_68_P25075267 | chr7:48155196-48155240                            | NM_021387:571      | Vstm2b        | INSIDE                 | 0.587                                                        | 0.600                          | 1537.76            | 922.13             | 0.352                          | 1083.43            | 381.25             |
| A_68_P25063517 | chr7:38557044-38557088                            | NM_172385:-2295    | Zfp536        | PROMOTER               | 0.587                                                        | 0.596                          | 1286.86            | 767.42             | 0.350                          | 1140.18            | 399.32             |
| A_68_P28787943 | chr13:3358419-3358463                             |                    |               | Unknown                | 0.587                                                        | 0.572                          | 1915.00            | 1096.27            | 0.336                          | 1673.32            | 561.86             |
| A_68_P29848869 | chr14:100685216-100685260                         | AK021307:-1632     |               | PROMOTER               | 0.587                                                        | 0.662                          | 1466.94            | 971.10             | 0.389                          | 1239.62            | 482.10             |
| A_68_P23996382 | chr5:113567569-113567615                          | NM_172884:24741    | 2900026A02Rik | INSIDE                 | 0.586                                                        | 0.508                          | 1928.01            | 979.69             | 0.298                          | 1581.06            | 470.66             |

| ProbeName      | Target position of probe on CpG island microarray | TargetID           | GeneSymbol    | CpG island Description | Ratio of relative methylation (TiO <sub>2</sub> -NP/Vehicle) | Sham group                     |                    |                    | TiO <sub>2</sub> -H group      |                    |                    |
|----------------|---------------------------------------------------|--------------------|---------------|------------------------|--------------------------------------------------------------|--------------------------------|--------------------|--------------------|--------------------------------|--------------------|--------------------|
|                |                                                   |                    |               |                        |                                                              | Relative methylation (Cy5/Cy3) | Cy3 signal (Input) | Cy5 signal (MeDIP) | Relative methylation (Cy5/Cy3) | Cy3 signal (Input) | Cy5 signal (MeDIP) |
| A_68_P29113347 | chr13:69137713-69137757                           | NM_153534:685      | Adecy2        | INSIDE                 | 0.586                                                        | 0.475                          | 2924.73            | 1389.59            | 0.279                          | 2510.56            | 699.32             |
| A_68_P23818507 | chr5:77287352-77287398                            | NM_001163793:17751 | C530008M17Rik | INSIDE                 | 0.586                                                        | 2.378                          | 1867.71            | 4441.86            | 1.394                          | 1621.02            | 2258.91            |
| A_68_P30371307 | chr15:80118683-80118727                           | NM_001044308:1037  | Caena1i       | INSIDE                 | 0.586                                                        | 0.546                          | 1468.48            | 801.33             | 0.320                          | 1132.34            | 362.15             |
| A_68_P28925094 | chr13:31898196-31898240                           | NM_008592:-296     | Foxc1         | PROMOTER               | 0.586                                                        | 0.561                          | 1913.30            | 1073.09            | 0.329                          | 1442.34            | 474.33             |
| A_68_P31151376 | chr17:34115729-34115774                           | NR_004446:-15      | H2-K2         | DIVERGENT_PROMOTER     | 0.586                                                        | 0.479                          | 1184.32            | 567.85             | 0.281                          | 896.88             | 252.05             |
| A_68_P24637118 | chr6:91106557-91106606                            | NM_144919:-227     | Hdac11        | PROMOTER               | 0.586                                                        | 0.551                          | 945.08             | 520.85             | 0.323                          | 768.25             | 248.10             |
| A_68_P24116584 | chr5:135965213-135965257                          | NM_146001:55758    | Hip1          | INSIDE                 | 0.586                                                        | 0.687                          | 1038.07            | 713.20             | 0.403                          | 893.22             | 359.88             |
| A_68_P20646087 | chr1:138362972-138363016                          | NM_001081258:-1540 | Kif14         | PROMOTER               | 0.586                                                        | 0.509                          | 1568.30            | 797.99             | 0.298                          | 1246.87            | 371.71             |
| A_68_P31612701 | chr18:34569089-34569133                           | NM_001163004:34    | Pkd2l2        | INSIDE                 | 0.586                                                        | 0.478                          | 1227.35            | 587.13             | 0.280                          | 1201.01            | 336.66             |
| A_68_P28549414 | chr12:76696397-76696441                           | NM_012024:769      | Ppp2r5e       | INSIDE                 | 0.586                                                        | 0.546                          | 1307.02            | 713.63             | 0.320                          | 1038.60            | 332.58             |
| A_68_P23239264 | chr4:117933534-117933578                          | NM_011213:30446    | Ptprf         | INSIDE                 | 0.586                                                        | 0.622                          | 2082.68            | 1295.04            | 0.364                          | 1607.52            | 585.38             |
| A_68_P28187725 | chr11:120812339-120812383                         | NM_001038653:1980  | Slc16a3       | INSIDE                 | 0.586                                                        | 0.481                          | 1844.74            | 887.19             | 0.282                          | 1489.49            | 419.73             |
| A_68_P27086284 | chr10:40603346-40603390                           | NM_031877:29       | Wasf1         | INSIDE                 | 0.586                                                        | 0.617                          | 1123.31            | 692.57             | 0.361                          | 904.19             | 326.61             |
| A_68_P30511519 | chr16:4679291-4679335                             | NM_030205:408      | Coro7         | INSIDE                 | 0.585                                                        | 0.743                          | 2750.91            | 2044.13            | 0.435                          | 2371.87            | 1031.09            |
| A_68_P29688234 | chr14:68551046-68551090                           | NM_177780:561      | Dock5         | INSIDE                 | 0.585                                                        | 0.514                          | 1339.68            | 688.48             | 0.300                          | 1156.66            | 347.46             |
| A_68_P23120702 | chr4:94717432-94717476                            | NM_010591:1459     | Jun           | INSIDE                 | 0.585                                                        | 0.436                          | 1934.02            | 843.61             | 0.255                          | 1533.51            | 391.60             |
| A_68_P21076058 | chr2:25915846-25915890                            | NM_001037098:32048 | Nacc2         | INSIDE                 | 0.585                                                        | 3.005                          | 760.70             | 2285.96            | 1.759                          | 618.06             | 1087.18            |
| A_68_P20927663 | chr1:191552534-191552578                          | NM_008976:410      | Ptpn14        | INSIDE                 | 0.585                                                        | 0.627                          | 1222.18            | 765.79             | 0.367                          | 994.35             | 364.73             |
| A_68_P25025137 | chr7:29849427-29849471                            | NM_009109:60722    | Ryr1          | INSIDE                 | 0.585                                                        | 3.562                          | 488.34             | 1739.48            | 2.085                          | 447.61             | 933.23             |
| A_68_P24265240 | chr6:17015458-17015502                            | NM_207176:332      | Tes           | INSIDE                 | 0.585                                                        | 0.500                          | 1068.22            | 534.25             | 0.293                          | 888.76             | 260.11             |
| A_68_P20346582 | chr1:74115236-74115286                            | NM_027884:55761    | Tns1          | INSIDE                 | 0.585                                                        | 0.486                          | 1637.65            | 796.65             | 0.284                          | 1178.01            | 335.06             |
| A_68_P30214224 | chr15:51871601-51871645                           | NM_175503:-30      | Aard          | PROMOTER               | 0.584                                                        | 0.646                          | 1498.65            | 967.89             | 0.377                          | 1408.32            | 531.36             |
| A_68_P26289572 | chr9:7837195-7837239                              | NM_007465:-1961    | Birc2         | PROMOTER               | 0.584                                                        | 0.612                          | 1049.29            | 642.09             | 0.357                          | 770.67             | 275.28             |
| A_68_P32130738 | chr19:44220823-44220867                           | NM_028607:92       | Blocl1s2      | INSIDE                 | 0.584                                                        | 0.550                          | 1274.72            | 701.66             | 0.322                          | 1090.56            | 350.70             |
| A_68_P27533815 | chr10:126500675-126500719                         | NM_009870:38       | Cdk4          | INSIDE                 | 0.584                                                        | 0.617                          | 1119.52            | 690.68             | 0.360                          | 881.74             | 317.42             |
| A_68_P21603779 | chr2:125450959-125451003                          | NM_001081091:-131  | Cep152        | PROMOTER               | 0.584                                                        | 0.440                          | 1192.28            | 525.10             | 0.257                          | 954.54             | 245.33             |
| A_68_P21820017 | chr2:164658603-164658647                          | NM_001038492:252   | Ctsa          | INSIDE                 | 0.584                                                        | 0.619                          | 1168.57            | 723.19             | 0.361                          | 836.37             | 302.12             |
| A_68_P31928719 | chr19:5447756-5447800                             | NM_010235:81       | Fosl1         | INSIDE                 | 0.584                                                        | 0.663                          | 1175.44            | 778.85             | 0.387                          | 992.25             | 383.70             |
| A_68_P30358260 | chr15:78004836-78004880                           | NM_025931:-320     | Ift27         | PROMOTER               | 0.584                                                        | 0.484                          | 2458.65            | 1188.88            | 0.282                          | 1884.91            | 532.31             |
| A_68_P31927054 | chr19:5117908-5117952                             | NM_008451:478      | Klc2          | INSIDE                 | 0.584                                                        | 0.569                          | 1030.60            | 585.96             | 0.332                          | 772.93             | 256.46             |
| A_68_P27903938 | chr11:70833216-70833260                           | NM_025993:126      | Mis12         | INSIDE                 | 0.584                                                        | 0.426                          | 1984.46            | 845.79             | 0.249                          | 1636.81            | 407.41             |
| A_68_P28157575 | chr11:115999733-115999777                         | NM_024177:428      | Mrpl38        | INSIDE                 | 0.584                                                        | 0.723                          | 2131.30            | 1540.49            | 0.422                          | 1658.02            | 700.46             |
| A_68_P24990653 | chr7:19548237-19548281                            | NM_001029877:37022 | Nova2         | INSIDE                 | 0.584                                                        | 0.596                          | 864.84             | 515.06             | 0.348                          | 716.69             | 249.28             |
| A_68_P25809871 | chr8:42325399-42325443                            | NM_023662:308      | Pem1          | INSIDE                 | 0.584                                                        | 0.450                          | 1836.14            | 826.68             | 0.263                          | 1441.26            | 379.25             |
| A_68_P29094161 | chr13:63665111-63665155                           | NM_008957:1696     | Ptch1         | INSIDE                 | 0.584                                                        | 0.636                          | 1075.76            | 683.74             | 0.371                          | 814.33             | 302.29             |
| A_68_P22753437 | chr4:16090490-16090534                            | NM_138952:133      | Ripk2         | INSIDE                 | 0.584                                                        | 0.534                          | 3360.68            | 1795.39            | 0.312                          | 2760.93            | 861.70             |
| A_68_P27160893 | chr10:57252088-57252132                           | NM_019760:225      | Serinc1       | INSIDE                 | 0.584                                                        | 0.598                          | 2679.26            | 1601.93            | 0.349                          | 2042.17            | 713.07             |
| A_68_P26229670 | chr8:124431063-124431107                          | NM_011404:502      | Slc7a5        | INSIDE                 | 0.584                                                        | 0.556                          | 1446.85            | 804.54             | 0.325                          | 967.08             | 314.19             |
| A_68_P23749449 | chr5:64550826-64550870                            | NM_019636:-601     | Tbc1d1        | PROMOTER               | 0.584                                                        | 0.723                          | 1945.85            | 1406.56            | 0.422                          | 1543.93            | 651.55             |
| A_68_P30405821 | chr15:8604475-86044819                            | NM_145476:-92      | Tbc1d22a      | PROMOTER               | 0.584                                                        | 0.707                          | 1291.53            | 913.22             | 0.413                          | 1017.61            | 420.45             |
| A_68_P24097673 | chr5:131783669-131783713                          | NM_145218:-298     | Wbscr17       | PROMOTER               | 0.584                                                        | 0.547                          | 1383.22            | 756.17             | 0.319                          | 1156.88            | 369.14             |
| A_68_P27630624 | chr11:20149666-20149710                           | NM_172260:-261     | Cep68         | PROMOTER               | 0.583                                                        | 0.701                          | 1895.69            | 1328.52            | 0.409                          | 1310.85            | 535.75             |
| A_68_P23797904 | chr5:73881900-73881944                            | NM_001190733:-342  | Deun1d4       | PROMOTER               | 0.583                                                        | 0.535                          | 1183.96            | 633.58             | 0.312                          | 948.80             | 296.23             |
| A_68_P21823221 | chr2:165151623-165151667                          | NM_207705:-9251    | Elmo2         | PROMOTER               | 0.583                                                        | 0.534                          | 1692.06            | 904.29             | 0.311                          | 1298.13            | 404.31             |
| A_68_P30589022 | chr16:20695936-20695980                           | NM_133778:829      | Fam131a       | INSIDE                 | 0.583                                                        | 0.481                          | 1123.15            | 539.78             | 0.280                          | 885.61             | 248.13             |
| A_68_P32135379 | chr19:45006013-45006057                           | NM_001081225:426   | Fam178a       | INSIDE                 | 0.583                                                        | 0.712                          | 1613.59            | 1149.54            | 0.415                          | 1325.25            | 550.36             |
| A_68_P25361477 | chr7:106530129-106530173                          | NM_201352:92       | Gdpc5         | INSIDE                 | 0.583                                                        | 0.713                          | 4847.48            | 3456.02            | 0.415                          | 3705.98            | 1539.77            |
| A_68_P27897910 | chr11:69727956-69728000                           | NM_019726:285      | Gps2          | INSIDE                 | 0.583                                                        | 0.475                          | 2358.46            | 1120.53            | 0.277                          | 2000.33            | 553.62             |
| A_68_P31381050 | chr17:80461904-80461948                           | NM_144802:-252     | Hnrp1l        | PROMOTER               | 0.583                                                        | 0.604                          | 1043.17            | 630.03             | 0.352                          | 867.92             | 305.53             |
| A_68_P31618898 | chr18:35721681-35721725                           | NM_010771:-109     | Matr3         | PROMOTER               | 0.583                                                        | 0.687                          | 1018.69            | 700.32             | 0.401                          | 801.10             | 320.86             |
| A_68_P23312412 | chr4:132019695-132019742                          | NM_026039:118      | Med18         | INSIDE                 | 0.583                                                        | 0.639                          | 1206.94            | 770.71             | 0.372                          | 972.08             | 362.05             |

| ProbeName      | Target position of probe on CpG island microarray | TargetID           | GeneSymbol    | CpG island Description | Ratio of relative methylation (TiO <sub>2</sub> -NP/Vehicle) | Sham group                     |                    |                    | TiO <sub>2</sub> -H group      |                    |                    |
|----------------|---------------------------------------------------|--------------------|---------------|------------------------|--------------------------------------------------------------|--------------------------------|--------------------|--------------------|--------------------------------|--------------------|--------------------|
|                |                                                   |                    |               |                        |                                                              | Relative methylation (Cy5/Cy3) | Cy3 signal (Input) | Cy5 signal (MeDIP) | Relative methylation (Cy5/Cy3) | Cy3 signal (Input) | Cy5 signal (MeDIP) |
| A_68_P21842487 | chr2:168427037-168427082                          | NM_001037178:96    | Nfate2        | INSIDE                 | 0.583                                                        | 0.632                          | 2127.20            | 1343.38            | 0.368                          | 1665.96            | 612.90             |
| A_68_P25144267 | chr7:63217811-63217855                            | NM_023647:-12      | Nipa2         | DIVERGENT_PROMOTER     | 0.583                                                        | 0.572                          | 1925.68            | 1102.39            | 0.334                          | 1670.82            | 557.86             |
| A_68_P23417946 | chr4:151687386-151687430                          | NM_001033489:5326  | Rnf207        | INSIDE                 | 0.583                                                        | 0.395                          | 1871.00            | 738.27             | 0.230                          | 1446.89            | 332.85             |
| A_68_P25021896 | chr7:292221702-29221746                           | NM_175021:-514     | Samd4b        | DIVERGENT_PROMOTER     | 0.583                                                        | 0.559                          | 1178.30            | 658.97             | 0.326                          | 988.86             | 322.20             |
| A_68_P32113654 | chr19:41281095-41281139                           | NM_011904:148      | Tll2          | INSIDE                 | 0.583                                                        | 0.324                          | 1788.52            | 579.01             | 0.189                          | 1515.62            | 285.94             |
| A_68_P25393298 | chr7:112766252-112766301                          | NM_018880:15737    | Trim3         | INSIDE                 | 0.583                                                        | 3.635                          | 900.14             | 3272.04            | 2.120                          | 687.53             | 1457.72            |
| A_68_P27553116 | chr11:3549120-3549164                             | NR_002321:-331     | Tug1          | DIVERGENT_PROMOTER     | 0.583                                                        | 0.551                          | 1689.80            | 930.29             | 0.321                          | 1397.58            | 448.47             |
| A_68_P24084069 | chr5:129106010-129106054                          | NR_015517:530      | 5930412G12Rik | INSIDE                 | 0.582                                                        | 0.549                          | 1411.44            | 774.39             | 0.319                          | 1193.13            | 381.14             |
| A_68_P32186064 | chr19:54121845-54121889                           | NM_007417:2195     | Adra2a        | INSIDE                 | 0.582                                                        | 0.467                          | 4281.35            | 1999.14            | 0.272                          | 3174.42            | 862.59             |
| A_68_P27987612 | chr11:86014370-86014414                           | NM_178309:303      | Brip1         | INSIDE                 | 0.582                                                        | 0.442                          | 1329.23            | 586.89             | 0.257                          | 1017.15            | 261.40             |
| A_68_P28053991 | chr11:97884084-97884128                           | NM_145121:-165     | Caenb1        | DIVERGENT_PROMOTER     | 0.582                                                        | 0.583                          | 1340.27            | 781.35             | 0.339                          | 1030.71            | 349.81             |
| A_68_P22715816 | chr4:8618846-8618890                              | NM_001081417:801   | Chd7          | INSIDE                 | 0.582                                                        | 0.588                          | 1987.24            | 1168.28            | 0.342                          | 1535.90            | 525.41             |
| A_68_P22383904 | chr3:102824419-102824463                          | NM_001161854:-28   | Csde1         | PROMOTER               | 0.582                                                        | 0.712                          | 1739.02            | 1238.71            | 0.414                          | 1408.55            | 583.84             |
| A_68_P22998987 | chr4:68614912-68614956                            | NM_019967:497      | Dbc1          | INSIDE                 | 0.582                                                        | 0.588                          | 4040.92            | 2377.58            | 0.343                          | 2851.93            | 976.91             |
| A_68_P21486502 | chr2:103810841-103810885                          | NM_001142335:419   | Lmo2          | INSIDE                 | 0.582                                                        | 0.502                          | 2107.53            | 1058.46            | 0.292                          | 1592.02            | 465.02             |
| A_68_P27855153 | chr11:62478528-62478583                           | NM_175002:16390    | Mmgt2         | INSIDE                 | 0.582                                                        | 2.520                          | 1615.21            | 4069.55            | 1.466                          | 1313.96            | 1926.60            |
| A_68_P23749118 | chr5:64484258-64484302                            | NM_025700:92       | Pgm1          | INSIDE                 | 0.582                                                        | 0.435                          | 1405.88            | 610.91             | 0.253                          | 1098.24            | 277.77             |
| A_68_P22778510 | chr4:22415241-22415285                            | NM_008899:16       | Pou3f2        | INSIDE                 | 0.582                                                        | 0.557                          | 1936.78            | 1078.50            | 0.324                          | 1608.27            | 521.51             |
| A_68_P31919102 | chr19:3767890-3767935                             | NM_001167884:492   | Suv420h1      | INSIDE                 | 0.582                                                        | 0.368                          | 1882.44            | 692.33             | 0.214                          | 1476.78            | 316.13             |
| A_68_P23291909 | chr4:128263071-128263115                          | NM_177758:24250    | Zscan20       | INSIDE                 | 0.582                                                        | 2.509                          | 1907.70            | 4786.37            | 1.460                          | 1270.91            | 1855.73            |
| A_68_P26351649 | chr9:22193381-22193425                            | NM_028390:248      | Anln          | INSIDE                 | 0.581                                                        | 0.534                          | 2202.16            | 1176.53            | 0.311                          | 1832.55            | 569.23             |
| A_68_P23237382 | chr4:117602465-117602509                          | NM_009711:-118     | Artn          | PROMOTER               | 0.581                                                        | 0.578                          | 927.52             | 535.73             | 0.336                          | 760.39             | 255.25             |
| A_68_P26352023 | chr9:22280042-22280086                            | NM_178415:-94      | Bbs9          | DIVERGENT_PROMOTER     | 0.581                                                        | 0.453                          | 2385.20            | 1080.37            | 0.263                          | 1848.16            | 486.01             |
| A_68_P29639450 | chr14:60216642-60216686                           | NM_001168535:132   | Cdadc1        | INSIDE                 | 0.581                                                        | 0.529                          | 1593.61            | 843.08             | 0.307                          | 1313.86            | 403.51             |
| A_68_P24483216 | chr6:58781482-58781526                            | NM_028705:-2189    | Herc3         | PROMOTER               | 0.581                                                        | 0.701                          | 1869.26            | 1311.24            | 0.408                          | 1596.32            | 650.82             |
| A_68_P21814760 | chr2:163679507-163679551                          | NM_001030292:43    | Kenk15        | INSIDE                 | 0.581                                                        | 0.683                          | 1483.07            | 1013.04            | 0.397                          | 1168.80            | 463.49             |
| A_68_P21820020 | chr2:164658912-164658956                          | NM_001082974:162   | Neur12        | INSIDE                 | 0.581                                                        | 0.624                          | 2133.92            | 1331.60            | 0.363                          | 1653.66            | 600.01             |
| A_68_P20354547 | chr1:75502266-75502310                            | NM_178884:739      | Obsl1         | INSIDE                 | 0.581                                                        | 0.691                          | 1324.77            | 915.62             | 0.402                          | 1148.24            | 461.21             |
| A_68_P30213987 | chr15:51823056-51823100                           | NM_009009:228      | Rad21         | INSIDE                 | 0.581                                                        | 0.625                          | 1189.79            | 743.37             | 0.363                          | 1281.63            | 465.47             |
| A_68_P31303254 | chr17:66234502-66234546                           | NM_001198949:-261  | Ralbp1        | PROMOTER               | 0.581                                                        | 0.565                          | 1492.42            | 842.92             | 0.328                          | 1169.84            | 384.02             |
| A_68_P25094672 | chr7:52970422-52970466                            | NM_020011:133      | Sphk2         | INSIDE                 | 0.581                                                        | 0.611                          | 1761.61            | 1077.13            | 0.355                          | 1348.74            | 479.06             |
| A_68_P29560588 | chr14:41779590-41779634                           | NM_145928:484      | Tspan14       | INSIDE                 | 0.581                                                        | 0.520                          | 1838.70            | 955.94             | 0.302                          | 1504.30            | 454.60             |
| A_68_P24129053 | chr5:138596838-138596882                          | NM_019747:112      | Zfp113        | INSIDE                 | 0.581                                                        | 0.696                          | 1327.08            | 923.33             | 0.404                          | 1009.66            | 407.96             |
| A_68_P30350970 | chr15:76701410-76701454                           | NM_001007568:433   | Zfp251        | INSIDE                 | 0.581                                                        | 0.542                          | 1337.07            | 724.17             | 0.315                          | 1079.66            | 339.70             |
| A_68_P24165132 | chr5:146041465-146041509                          | NM_001081431:-2725 | Zfp498        | PROMOTER               | 0.581                                                        | 0.514                          | 1170.54            | 602.02             | 0.299                          | 1047.64            | 313.04             |
| A_68_P29455233 | chr14:22668221-22668265                           | NM_026965:-110     | Comtd1        | PROMOTER               | 0.580                                                        | 0.619                          | 1182.20            | 732.35             | 0.359                          | 892.59             | 320.72             |
| A_68_P30109622 | chr15:30576916-30576960                           | NM_008729:474591   | Ctnd2         | INSIDE                 | 0.580                                                        | 0.676                          | 6571.73            | 4443.22            | 0.392                          | 5192.23            | 2037.84            |
| A_68_P30477181 | chr15:98724879-98724923                           | NM_007857:4071     | Dhh           | INSIDE                 | 0.580                                                        | 0.550                          | 1153.09            | 634.29             | 0.319                          | 1038.42            | 331.31             |
| A_68_P23539567 | chr5:23536236-23536280                            | NM_053090:243      | Fam126a       | INSIDE                 | 0.580                                                        | 0.532                          | 1173.13            | 624.22             | 0.309                          | 1009.61            | 311.81             |
| A_68_P25181446 | chr7:72301608-72301652                            | NM_183087:-216     | Fam189a1      | PROMOTER               | 0.580                                                        | 0.633                          | 1533.31            | 971.24             | 0.368                          | 1321.13            | 485.66             |
| A_68_P24173494 | chr5:148211545-148211589                          | NM_010229:499      | Flt3          | INSIDE                 | 0.580                                                        | 0.536                          | 1212.71            | 649.66             | 0.311                          | 1069.32            | 332.11             |
| A_68_P25965607 | chr8:75876888-75876932                            | NM_010687:-455     | Large         | PROMOTER               | 0.580                                                        | 0.640                          | 3075.41            | 1967.19            | 0.371                          | 2662.94            | 987.24             |
| A_68_P31113238 | chr17:27070074-27070118                           | NM_009343:25       | Phf1          | INSIDE                 | 0.580                                                        | 0.473                          | 1647.89            | 778.89             | 0.274                          | 1296.92            | 355.43             |
| A_68_P22282899 | chr3:82859431-82859475                            | NM_016784:-7       | Plrg1         | DIVERGENT_PROMOTER     | 0.580                                                        | 0.691                          | 1792.03            | 1238.57            | 0.401                          | 1438.42            | 576.72             |
| A_68_P25736232 | chr8:28153444-28153488                            | NM_001039077:440   | Prosc         | INSIDE                 | 0.580                                                        | 0.637                          | 1710.49            | 1089.82            | 0.370                          | 1291.68            | 477.72             |
| A_68_P26825589 | chr9:110645592-110645636                          | NM_001083936:-500  | Pth1r         | PROMOTER               | 0.580                                                        | 0.411                          | 1991.10            | 817.54             | 0.238                          | 1559.66            | 371.21             |
| A_68_P21132195 | chr2:35055732-35055776                            | NM_026697:886      | Rab14         | INSIDE                 | 0.580                                                        | 0.630                          | 1690.96            | 1065.90            | 0.366                          | 1391.18            | 508.67             |
| A_68_P24983214 | chr7:17367558-17367602                            | NM_009201:886      | Slc1a5        | INSIDE                 | 0.580                                                        | 0.568                          | 2163.86            | 1229.99            | 0.330                          | 1549.68            | 511.26             |
| A_68_P26015637 | chr8:86118596-86118640                            | NM_027179:-228     | Tecr          | PROMOTER               | 0.580                                                        | 0.569                          | 1785.36            | 1015.03            | 0.330                          | 1281.21            | 422.42             |
| A_68_P27188397 | chr10:62349624-62349668                           | NM_027384:-6884    | Tet1          | PROMOTER               | 0.580                                                        | 0.470                          | 1401.47            | 658.65             | 0.273                          | 1197.01            | 326.31             |
| A_68_P29211816 | chr13:90229293-90229337                           | NM_025335:43       | Tmem167       | INSIDE                 | 0.580                                                        | 0.594                          | 2440.41            | 1450.01            | 0.345                          | 1874.10            | 646.27             |



| ProbeName      | Target position of probe on CpG island microarray | TargetID           | GeneSymbol    | CpG island Description | Ratio of relative methylation (TiO <sub>2</sub> -NP/Vehicle) | Sham group                     |                    |                    | TiO <sub>2</sub> -H group      |                    |                    |
|----------------|---------------------------------------------------|--------------------|---------------|------------------------|--------------------------------------------------------------|--------------------------------|--------------------|--------------------|--------------------------------|--------------------|--------------------|
|                |                                                   |                    |               |                        |                                                              | Relative methylation (Cy5/Cy3) | Cy3 signal (Input) | Cy5 signal (MeDIP) | Relative methylation (Cy5/Cy3) | Cy3 signal (Input) | Cy5 signal (MeDIP) |
| A_68_P22881129 | chr4:45120647-45120691                            | NM_001099675:317   | Tomm5         | INSIDE                 | 0.580                                                        | 0.725                          | 3108.26            | 2254.27            | 0.421                          | 2339.66            | 984.34             |
| A_68_P26024221 | chr8:87823033-87823077                            | NM_022997:342      | Vps35         | INSIDE                 | 0.580                                                        | 0.564                          | 1183.96            | 668.26             | 0.327                          | 1087.68            | 356.17             |
| A_68_P20730831 | chr1:156052030-156052074                          | NM_001204908:3736  | Zfp648        | INSIDE                 | 0.580                                                        | 0.635                          | 1837.98            | 1167.92            | 0.368                          | 1387.16            | 511.01             |
| A_68_P31921019 | chr19:4097126-4097170                             | NM_026373:-202     | Cdk2ap2       | PROMOTER               | 0.579                                                        | 0.598                          | 2421.43            | 1448.75            | 0.347                          | 1777.27            | 616.17             |
| A_68_P30475796 | chr15:98493283-98493327                           | NM_001080981:16    | Ddx23         | INSIDE                 | 0.579                                                        | 0.691                          | 2075.61            | 1433.25            | 0.400                          | 1564.93            | 625.98             |
| A_68_P27941031 | chr11:77845557-77845601                           | NM_183286:-236     | Dhrs13        | PROMOTER               | 0.579                                                        | 0.745                          | 3029.23            | 2257.21            | 0.432                          | 2349.80            | 1014.47            |
| A_68_P31928290 | chr19:5367444-5367500                             | NM_027236:660      | Eif1ad        | INSIDE                 | 0.579                                                        | 0.459                          | 1233.97            | 566.61             | 0.266                          | 1159.37            | 308.41             |
| A_68_P25528910 | chr7:138687411-138687455                          | NM_008257:956      | Hmx3          | INSIDE                 | 0.579                                                        | 0.611                          | 2432.25            | 1486.29            | 0.354                          | 1796.73            | 635.58             |
| A_68_P24634428 | chr6:90686241-90686285                            | NM_001134384:73855 | Iqsec1        | INSIDE                 | 0.579                                                        | 0.678                          | 2612.91            | 1772.44            | 0.393                          | 2089.01            | 820.01             |
| A_68_P21811852 | chr2:163165006-163165050                          | NM_021566:58681    | Jph2          | INSIDE                 | 0.579                                                        | 2.985                          | 3279.26            | 9788.78            | 1.727                          | 2219.38            | 3833.21            |
| A_68_P28814398 | chr13:9092754-9092798                             | NM_172585:-374     | Larp4b        | PROMOTER               | 0.579                                                        | 0.462                          | 2798.39            | 1293.94            | 0.268                          | 2228.87            | 596.23             |
| A_68_P26465869 | chr9:43938100-43938144                            | NM_023061:-4618    | Mcam          | PROMOTER               | 0.579                                                        | 0.651                          | 1367.40            | 889.59             | 0.377                          | 920.52             | 346.68             |
| A_68_P31400333 | chr17:84105260-84105304                           | NM_001171053:-220  | Mta3          | PROMOTER               | 0.579                                                        | 0.580                          | 2863.75            | 1660.20            | 0.336                          | 2363.73            | 793.91             |
| A_68_P29681978 | chr14:67528942-67528986                           | NM_175498:-1080    | Pnma2         | PROMOTER               | 0.579                                                        | 0.659                          | 2916.67            | 1920.97            | 0.381                          | 2155.40            | 821.28             |
| A_68_P26783903 | chr9:103014881-103014925                          | NM_173781:499      | Rab6b         | INSIDE                 | 0.579                                                        | 0.656                          | 1862.64            | 1222.49            | 0.380                          | 1492.34            | 567.03             |
| A_68_P23328514 | chr4:134990088-134990132                          | NM_022980:-390     | Recan3        | PROMOTER               | 0.579                                                        | 0.637                          | 1470.26            | 936.68             | 0.369                          | 1113.42            | 410.39             |
| A_68_P32131187 | chr19:44322861-44322905                           | NM_024450:45105    | Scd3          | DOWNSTREAM             | 0.579                                                        | 0.483                          | 1336.55            | 645.79             | 0.280                          | 1158.84            | 324.23             |
| A_68_P23212277 | chr4:111392547-111392591                          | NM_026470:-46      | Spata6        | PROMOTER               | 0.579                                                        | 0.722                          | 2450.04            | 1768.02            | 0.418                          | 1935.81            | 808.79             |
| A_68_P21395954 | chr2:84877657-84877701                            | NM_001136081:71    | Ssrp1         | INSIDE                 | 0.579                                                        | 0.680                          | 1147.42            | 780.43             | 0.394                          | 841.63             | 331.42             |
| A_68_P23416141 | chr4:151406800-151406844                          | NM_031867:5777     | Tas1r1        | INSIDE                 | 0.579                                                        | 2.881                          | 2323.06            | 6692.06            | 1.668                          | 1697.79            | 2831.10            |
| A_68_P26713770 | chr9:89599836-89599880                            | NM_025360:23       | Tmed3         | INSIDE                 | 0.579                                                        | 0.526                          | 1640.26            | 863.54             | 0.305                          | 1456.47            | 443.97             |
| A_68_P28087330 | chr11:103671857-103671901                         | NM_009521:36390    | Wnt3          | INSIDE                 | 0.579                                                        | 0.650                          | 1416.30            | 921.02             | 0.377                          | 1132.06            | 426.34             |
| A_68_P21907109 | chr2:180655229-180655273                          | NM_173761:391      | Ythdf1        | INSIDE                 | 0.579                                                        | 0.732                          | 4037.06            | 2954.50            | 0.423                          | 3038.38            | 1286.42            |
| A_68_P20997496 | chr2:9804242-9804286                              | NR_024257:1392     | 4930412013Rik | INSIDE                 | 0.578                                                        | 0.432                          | 1238.32            | 535.15             | 0.250                          | 906.54             | 226.47             |
| A_68_P31099615 | chr17:24941244-24941288                           | NM_029197:-60      | 4930528F23Rik | PROMOTER               | 0.578                                                        | 0.577                          | 956.95             | 552.02             | 0.333                          | 928.45             | 309.45             |
| A_68_P30931274 | chr16:85802529-85802573                           | NM_009621:810      | Adams1        | INSIDE                 | 0.578                                                        | 0.515                          | 1303.21            | 671.32             | 0.298                          | 1028.77            | 306.50             |
| A_68_P25190563 | chr7:73984782-73984826                            | NM_001033877:184   | Adams17       | INSIDE                 | 0.578                                                        | 0.708                          | 2513.85            | 1779.56            | 0.409                          | 1968.77            | 805.09             |
| A_68_P21587096 | chr2:122436805-122436849                          | NM_025961:187      | Gatm          | INSIDE                 | 0.578                                                        | 0.637                          | 1149.79            | 732.57             | 0.368                          | 992.33             | 365.34             |
| A_68_P25581954 | chr7:147234659-147234703                          | NM_010836:307      | Msx3          | INSIDE                 | 0.578                                                        | 0.504                          | 2172.19            | 1094.67            | 0.291                          | 1560.04            | 454.44             |
| A_68_P21419238 | chr2:90687606-90687650                            | NM_019758:317      | Mtch2         | INSIDE                 | 0.578                                                        | 0.484                          | 1622.41            | 785.73             | 0.280                          | 1170.82            | 327.70             |
| A_68_P27638868 | chr11:21896875-21896919                           | NM_011023:4758     | Otx1          | INSIDE                 | 0.578                                                        | 0.602                          | 908.17             | 547.01             | 0.348                          | 724.67             | 252.19             |
| A_68_P31934460 | chr19:6398732-6398778                             | NM_011242:-1828    | Rasgrp2       | PROMOTER               | 0.578                                                        | 0.465                          | 1130.32            | 525.27             | 0.268                          | 897.33             | 240.83             |
| A_68_P26522400 | chr9:53619652-53619696                            | NM_028060:333      | Slc35f2       | INSIDE                 | 0.578                                                        | 0.536                          | 1415.28            | 758.62             | 0.310                          | 1195.29            | 370.62             |
| A_68_P28137834 | chr11:112644282-112644326                         | NM_011448:781      | Sox9          | INSIDE                 | 0.578                                                        | 0.511                          | 1460.42            | 745.79             | 0.295                          | 1178.99            | 347.99             |
| A_68_P25065279 | chr7:38870220-38870264                            | AK181724:37896     |               | INSIDE                 | 0.578                                                        | 0.518                          | 1871.57            | 969.62             | 0.299                          | 1406.81            | 421.10             |
| A_68_P28713546 | chr12:107412574-107412618                         | BC156654:374736    |               | DOWNSTREAM             | 0.578                                                        | 0.432                          | 1914.63            | 826.66             | 0.250                          | 1554.94            | 388.09             |
| A_68_P30547087 | chr16:11254371-11254415                           | NM_001130008:26    | Gspt1         | INSIDE                 | 0.577                                                        | 0.614                          | 3031.98            | 1860.73            | 0.354                          | 2326.81            | 824.29             |
| A_68_P25596368 | chr7:149846445-149846489                          | NM_001122736:474   | Igf2          | INSIDE                 | 0.577                                                        | 0.370                          | 1630.36            | 603.75             | 0.214                          | 1179.04            | 252.07             |
| A_68_P28832392 | chr13:12553513-12553557                           | NM_001199043:471   | Lgals8        | INSIDE                 | 0.577                                                        | 0.611                          | 1021.01            | 623.80             | 0.352                          | 870.26             | 306.72             |
| A_68_P31104862 | chr17:25716282-25716326                           | NM_029624:186      | Lmf1          | INSIDE                 | 0.577                                                        | 0.708                          | 1309.45            | 926.46             | 0.409                          | 987.70             | 403.56             |
| A_68_P29284641 | chr13:104125004-104125048                         | NM_175171:-454     | Mast4         | PROMOTER               | 0.577                                                        | 0.664                          | 1558.60            | 1034.88            | 0.383                          | 1257.14            | 481.27             |
| A_68_P26024230 | chr8:87823989-87824033                            | NM_001163791:480   | Orc6          | INSIDE                 | 0.577                                                        | 0.591                          | 1130.55            | 668.43             | 0.341                          | 913.64             | 311.66             |
| A_68_P23696202 | chr5:53060801-53060845                            | NM_172490:118      | Sepsecs       | INSIDE                 | 0.577                                                        | 0.299                          | 1850.27            | 553.64             | 0.173                          | 1378.19            | 237.74             |
| A_68_P29879712 | chr14:106295768-106295812                         | NM_011897:246      | Spry2         | INSIDE                 | 0.577                                                        | 0.442                          | 1487.24            | 657.86             | 0.255                          | 1204.45            | 307.63             |
| A_68_P21303499 | chr2:68309684-68309728                            | NM_016866:332      | Stk39         | INSIDE                 | 0.577                                                        | 0.458                          | 1598.00            | 731.37             | 0.264                          | 1365.24            | 360.73             |
| A_68_P24001850 | chr5:114541225-114541269                          | NM_026805:143      | Svop          | INSIDE                 | 0.577                                                        | 4.049                          | 564.96             | 2287.46            | 2.338                          | 415.58             | 971.69             |
| A_68_P22411405 | chr3:108029325-108029369                          | NM_008596:171      | Sypl2         | INSIDE                 | 0.577                                                        | 0.591                          | 3969.92            | 2348.18            | 0.341                          | 3288.41            | 1121.94            |
| A_68_P30379763 | chr15:81642166-81642210                           | NM_017376:345      | Tef           | INSIDE                 | 0.577                                                        | 4.365                          | 785.27             | 3427.49            | 2.518                          | 798.52             | 2010.95            |
| A_68_P27780290 | chr11:48663076-48663120                           | NM_053166:23459    | Trim7         | INSIDE                 | 0.577                                                        | 2.957                          | 4750.74            | 14048.07           | 1.706                          | 3224.86            | 5501.84            |
| A_68_P24156073 | chr5:144090815-144090859                          | NM_028379:69       | Zdhhc4        | INSIDE                 | 0.577                                                        | 0.577                          | 3562.81            | 2054.34            | 0.333                          | 3003.39            | 999.47             |
| A_68_P31879119 | chr18:83079657-83079701                           | NM_183033:-592     | Zfp516        | PROMOTER               | 0.577                                                        | 0.687                          | 1555.85            | 1069.20            | 0.397                          | 1190.30            | 472.38             |

| ProbeName      | Target position of probe on CpG island microarray | TargetID               | GeneSymbol    | CpG island Description | Ratio of relative methylation (TiO <sub>2</sub> -NP/Vehicle) | Sham group                     |                    |                    | TiO <sub>2</sub> -H group      |                    |                    |
|----------------|---------------------------------------------------|------------------------|---------------|------------------------|--------------------------------------------------------------|--------------------------------|--------------------|--------------------|--------------------------------|--------------------|--------------------|
|                |                                                   |                        |               |                        |                                                              | Relative methylation (Cy5/Cy3) | Cy3 signal (Input) | Cy5 signal (MeDIP) | Relative methylation (Cy5/Cy3) | Cy3 signal (Input) | Cy5 signal (MeDIP) |
| A_68_P31620977 | chr18:36093125-36093169                           |                        |               | Unknown                | 0.577                                                        | 0.625                          | 1026.76            | 642.06             | 0.361                          | 821.13             | 296.34             |
| A_68_P23947955 | chr5:104121272-104121316                          | ENSMUST00000126355:-98 |               | PROMOTER               | 0.577                                                        | 0.610                          | 1540.71            | 939.63             | 0.352                          | 1314.96            | 462.88             |
| A_68_P27978000 | chr11:84339607-84339651                           | NR_038057:467          | 1500016L03Rik | INSIDE                 | 0.576                                                        | 0.596                          | 1987.31            | 1184.09            | 0.343                          | 1411.79            | 484.72             |
| A_68_P30476329 | chr15:98593570-98593614                           | NM_007478:-43          | Arf3          | PROMOTER               | 0.576                                                        | 0.556                          | 2638.09            | 1467.56            | 0.320                          | 2215.02            | 709.90             |
| A_68_P32260332 | chrX:11664013-11664057                            | NM_029510:-6355        | Bcor          | PROMOTER               | 0.576                                                        | 0.588                          | 1667.60            | 981.30             | 0.339                          | 737.01             | 249.92             |
| A_68_P31936680 | chr19:6996479-6996523                             | NM_007953:-202         | Esrra         | PROMOTER               | 0.576                                                        | 0.541                          | 1686.14            | 911.97             | 0.312                          | 1451.94            | 452.29             |
| A_68_P23892222 | chr5:92512823-92512867                            | NM_011816:-83          | G3bp2         | PROMOTER               | 0.576                                                        | 0.494                          | 1504.75            | 742.84             | 0.285                          | 1221.40            | 347.50             |
| A_68_P27805436 | chr11:53381255-53381299                           | NM_008443:396          | Kif3a         | INSIDE                 | 0.576                                                        | 0.531                          | 1519.41            | 806.94             | 0.306                          | 1138.73            | 348.14             |
| A_68_P24595550 | chr6:83745123-83745167                            | NM_001164187:-7        | Nagk          | PROMOTER               | 0.576                                                        | 0.700                          | 1824.13            | 1277.32            | 0.404                          | 1476.84            | 595.96             |
| A_68_P22009787 | chr3:27081688-27081732                            | NM_178772:-215         | Nceh1         | PROMOTER               | 0.576                                                        | 0.702                          | 2056.24            | 1443.40            | 0.404                          | 1651.64            | 667.85             |
| A_68_P28863267 | chr13:19714988-19715032                           | NM_016687:-33          | Sfrp4         | DIVERGENT_PROMOTER     | 0.576                                                        | 0.589                          | 1211.63            | 713.85             | 0.340                          | 957.44             | 325.14             |
| A_68_P27804858 | chr11:53270789-53270833                           | NM_027917:104          | Shroom1       | INSIDE                 | 0.576                                                        | 0.401                          | 1370.05            | 549.13             | 0.231                          | 1092.37            | 252.36             |
| A_68_P30572953 | chr16:17278195-17278239                           | NM_177473:1824         | Tmem191c      | INSIDE                 | 0.576                                                        | 0.630                          | 1052.54            | 663.41             | 0.363                          | 834.60             | 302.99             |
| A_68_P22887152 | chr4:46151235-46151279                            | NM_173033:91           | Tstd2         | INSIDE                 | 0.576                                                        | 0.516                          | 2509.76            | 1294.07            | 0.297                          | 1766.84            | 525.10             |
| A_68_P30351332 | chr15:76779347-76779391                           | NM_054099:395          | 1110038F14Rik | INSIDE                 | 0.575                                                        | 0.453                          | 1546.39            | 700.56             | 0.261                          | 1351.00            | 352.07             |
| A_68_P30977033 | chr16:93683476-93683520                           | NM_173047:35           | Chr3          | INSIDE                 | 0.575                                                        | 0.313                          | 1765.34            | 552.66             | 0.180                          | 1377.70            | 248.14             |
| A_68_P23241428 | chr4:118293645-118293692                          | NR_029469:-5340        | D4Erted617e   | PROMOTER               | 0.575                                                        | 0.694                          | 1313.45            | 911.38             | 0.399                          | 963.78             | 384.26             |
| A_68_P23103759 | chr4:91041388-91041432                            | NM_010486:-2664        | Elavl2        | PROMOTER               | 0.575                                                        | 0.693                          | 2443.92            | 1693.04            | 0.398                          | 2132.77            | 848.93             |
| A_68_P26657025 | chr9:77765481-77765525                            | NM_134255:331          | Elovl5        | INSIDE                 | 0.575                                                        | 0.572                          | 998.33             | 571.27             | 0.329                          | 842.64             | 277.24             |
| A_68_P32130261 | chr19:44144105-44144149                           | NM_145502:50           | Erlin1        | INSIDE                 | 0.575                                                        | 0.546                          | 1589.93            | 868.54             | 0.314                          | 1403.40            | 440.59             |
| A_68_P23979843 | chr5:110877476-110877520                          | NM_001142642:24        | Fbrs11        | INSIDE                 | 0.575                                                        | 0.491                          | 1786.34            | 877.14             | 0.283                          | 1389.15            | 392.50             |
| A_68_P24326760 | chr6:29424133-29424177                            | NM_001145360:2718      | Gm9047        | DOWNSTREAM             | 0.575                                                        | 0.439                          | 1592.23            | 699.21             | 0.252                          | 1285.44            | 324.39             |
| A_68_P32082884 | chr19:34996996-34997040                           | NM_183046:171          | Kif20b        | INSIDE                 | 0.575                                                        | 0.534                          | 1524.39            | 813.30             | 0.307                          | 1149.54            | 352.94             |
| A_68_P27977992 | chr11:84338560-84338604                           | NM_008498:454          | Lhx1          | INSIDE                 | 0.575                                                        | 0.719                          | 1637.36            | 1176.99            | 0.413                          | 1242.14            | 513.35             |
| A_68_P25972025 | chr8:77633597-77633641                            | NM_008566:192          | Mem5          | INSIDE                 | 0.575                                                        | 0.451                          | 1369.88            | 617.36             | 0.259                          | 1024.82            | 265.60             |
| A_68_P26871811 | chr9:119249105-119249149                          | NM_010851:32           | Myd88         | INSIDE                 | 0.575                                                        | 0.397                          | 1622.18            | 643.73             | 0.228                          | 1414.08            | 322.78             |
| A_68_P20347698 | chr1:74331582-74331626                            | NM_025580:-3           | Pnk4          | DIVERGENT_PROMOTER     | 0.575                                                        | 0.566                          | 1536.65            | 870.03             | 0.325                          | 1145.16            | 372.56             |
| A_68_P25500723 | chr7:133618294-133618338                          | NM_011363:328          | Sh2b1         | INSIDE                 | 0.575                                                        | 0.689                          | 1287.82            | 887.81             | 0.396                          | 1062.67            | 420.92             |
| A_68_P26717017 | chr9:90165120-90165164                            | NM_194334:465          | Tbc1d2b       | INSIDE                 | 0.575                                                        | 0.698                          | 2545.27            | 1777.14            | 0.402                          | 1817.95            | 730.18             |
| A_68_P24287933 | chr6:21802094-21802138                            | NM_173007:399          | Tspan12       | INSIDE                 | 0.575                                                        | 0.711                          | 1841.57            | 1309.71            | 0.409                          | 1520.64            | 622.07             |
| A_68_P20377582 | chr1:79758038-79758082                            | NM_001111279:284       | Wdfy1         | INSIDE                 | 0.575                                                        | 0.683                          | 4103.31            | 2801.99            | 0.393                          | 2836.70            | 1114.77            |
| A_68_P21332187 | chr2:73367126-73367170                            | NM_153138:319          | Wipfl         | INSIDE                 | 0.575                                                        | 0.654                          | 865.10             | 565.43             | 0.376                          | 827.83             | 311.21             |
| A_68_P21332193 | chr2:73367805-73367850                            | NM_153138:-360         | Wipfl         | PROMOTER               | 0.575                                                        | 0.529                          | 1822.11            | 964.58             | 0.304                          | 1528.39            | 464.90             |
| A_68_P23364201 | chr4:141020235-141020279                          | NM_009541:19669        | Zbtb17        | INSIDE                 | 0.575                                                        | 2.984                          | 2071.46            | 6182.02            | 1.717                          | 1603.27            | 2752.63            |
| A_68_P24114265 | chr5:135485654-135485698                          | NR_033794:351          | Abhd11        | INSIDE                 | 0.574                                                        | 0.617                          | 1223.70            | 754.79             | 0.354                          | 885.51             | 313.72             |
| A_68_P22568796 | chr3:138106098-138106142                          | NM_007410:-7           | Adh5          | PROMOTER               | 0.574                                                        | 0.367                          | 1963.40            | 720.78             | 0.211                          | 1479.80            | 311.80             |
| A_68_P26940377 | chr10:11063537-11063581                           | NM_010146:316          | Epm2a         | INSIDE                 | 0.574                                                        | 0.541                          | 1361.70            | 736.85             | 0.311                          | 1256.73            | 390.51             |
| A_68_P22603827 | chr3:144232599-144232643                          | NM_011828:560          | Hs2st1        | INSIDE                 | 0.574                                                        | 0.592                          | 1626.19            | 963.49             | 0.340                          | 1213.11            | 412.60             |
| A_68_P20074998 | chr1:20880874-20880920                            | NM_028829:194          | Pqsr8         | INSIDE                 | 0.574                                                        | 0.697                          | 1920.11            | 1338.10            | 0.400                          | 1499.85            | 599.83             |
| A_68_P30397289 | chr15:84684008-84684052                           | NM_001081166:2529      | Phf21b        | INSIDE                 | 0.574                                                        | 0.711                          | 2450.67            | 1742.93            | 0.408                          | 1998.97            | 815.55             |
| A_68_P29982792 | chr15:5192574-5192618                             | NM_001136079:1086      | Ptger4        | INSIDE                 | 0.574                                                        | 0.609                          | 1175.28            | 715.29             | 0.349                          | 1048.64            | 366.06             |
| A_68_P21762357 | chr2:154616385-154616429                          | NM_001139511:-439      | Raly          | PROMOTER               | 0.574                                                        | 0.530                          | 5463.18            | 2897.66            | 0.304                          | 4104.39            | 1249.13            |
| A_68_P20038597 | chr1:12982588-12982632                            | NM_172841:-1394        | Sleo5a1       | PROMOTER               | 0.574                                                        | 0.592                          | 1150.49            | 680.83             | 0.340                          | 942.04             | 320.02             |
| A_68_P31106586 | chr17:25970234-25970278                           | NM_019719:50           | Stub1         | INSIDE                 | 0.574                                                        | 0.606                          | 1580.31            | 957.97             | 0.348                          | 1193.25            | 415.48             |
| A_68_P20198785 | chr1:45852285-45852329                            | NM_028599:-39          | Wdr75         | PROMOTER               | 0.574                                                        | 0.557                          | 1204.36            | 670.33             | 0.319                          | 1004.44            | 320.88             |
| A_68_P30495241 | chr15:101807758-101807802                         |                        |               | Unknown                | 0.574                                                        | 0.612                          | 839.96             | 513.71             | 0.351                          | 627.35             | 220.06             |
| A_68_P25471459 | chr7:128126104-128126148                          | NM_028955:104          | 4933427G17Rik | INSIDE                 | 0.573                                                        | 0.600                          | 1261.10            | 756.18             | 0.344                          | 1044.62            | 359.02             |
| A_68_P27815711 | chr11:55274535-55274579                           | NM_009720:84           | Atox1         | INSIDE                 | 0.573                                                        | 0.421                          | 1520.34            | 640.64             | 0.241                          | 1224.27            | 295.63             |
| A_68_P32364049 | chrX:45696991-45697035                            | NM_178782:2478         | Bcor11        | INSIDE                 | 0.573                                                        | 3.269                          | 2293.72            | 7497.48            | 1.872                          | 912.24             | 1708.07            |
| A_68_P25843141 | chr8:48799219-48799263                            | NM_172407:45           | Cdkn2aip      | INSIDE                 | 0.573                                                        | 0.616                          | 3600.91            | 2218.30            | 0.353                          | 2750.15            | 970.19             |
| A_68_P32227330 | chr19:60887752-60887797                           | NM_001167829:302       | Fam45a        | INSIDE                 | 0.573                                                        | 0.602                          | 870.95             | 524.64             | 0.345                          | 770.61             | 266.04             |

| ProbeName      | Target position of probe on CpG island microarray | TargetID                 | GeneSymbol | CpG island Description | Ratio of relative methylation (TiO <sub>2</sub> -NP/Vehicle) | Sham group                     |                    |                    | TiO <sub>2</sub> -H group      |                    |                    |
|----------------|---------------------------------------------------|--------------------------|------------|------------------------|--------------------------------------------------------------|--------------------------------|--------------------|--------------------|--------------------------------|--------------------|--------------------|
|                |                                                   |                          |            |                        |                                                              | Relative methylation (Cy5/Cy3) | Cy3 signal (Input) | Cy5 signal (MeDIP) | Relative methylation (Cy5/Cy3) | Cy3 signal (Input) | Cy5 signal (MeDIP) |
| A_68_P26466888 | chr9:44113383-44113427                            | NM_172162:350            | Hinfp      | INSIDE                 | 0.573                                                        | 0.728                          | 1790.13            | 1302.75            | 0.417                          | 1557.83            | 649.66             |
| A_68_P31100627 | chr17:25097854-25097898                           | NM_198937:-308           | Hn11       | PROMOTER               | 0.573                                                        | 0.514                          | 1415.31            | 728.17             | 0.295                          | 1145.61            | 337.48             |
| A_68_P27765091 | chr11:45758223-45758267                           | NM_028185:193            | Lsm11      | INSIDE                 | 0.573                                                        | 0.376                          | 1929.95            | 725.05             | 0.215                          | 1567.62            | 337.36             |
| A_68_P28119819 | chr11:109511596-109511640                         | NM_021880:-644           | Prkar1a    | PROMOTER               | 0.573                                                        | 0.538                          | 1105.98            | 594.70             | 0.308                          | 836.18             | 257.86             |
| A_68_P32109309 | chr19:40588021-40588065                           | NM_178362:184            | Sorbs1     | INSIDE                 | 0.573                                                        | 0.468                          | 1716.44            | 804.03             | 0.269                          | 1455.53            | 390.82             |
| A_68_P22894262 | chr4:47366025-47366069                            | NM_009370:-130           | Tgfb1      | PROMOTER               | 0.573                                                        | 0.726                          | 2531.27            | 1837.14            | 0.416                          | 2232.68            | 929.32             |
| A_68_P26596751 | chr9:66896180-66896228                            | NM_001164252:-4526       | Tpm1       | PROMOTER               | 0.573                                                        | 0.467                          | 1734.19            | 810.51             | 0.268                          | 1328.51            | 355.62             |
| A_68_P30421911 | chr15:88721121-88721165                           | ENSMUST00000172019:63706 |            | INSIDE                 | 0.573                                                        | 0.597                          | 1352.42            | 807.08             | 0.342                          | 1126.91            | 385.52             |
| A_68_P28115679 | chr11:108781544-108781588                         | NM_015732:-96            | Axin2      | PROMOTER               | 0.572                                                        | 0.627                          | 1909.56            | 1196.62            | 0.358                          | 1757.95            | 630.21             |
| A_68_P20631266 | chr1:135975629-135975675                          | NM_007570:80             | Btg2       | INSIDE                 | 0.572                                                        | 0.519                          | 1236.30            | 641.90             | 0.297                          | 944.69             | 280.50             |
| A_68_P27089727 | chr10:41239601-41239645                           | NM_016898:317            | Cd164      | INSIDE                 | 0.572                                                        | 0.479                          | 1117.35            | 535.70             | 0.274                          | 1158.53            | 317.56             |
| A_68_P20240146 | chr1:55109304-55109348                            | NM_001039710:-287        | Coq10b     | PROMOTER               | 0.572                                                        | 0.604                          | 1427.39            | 862.22             | 0.346                          | 1131.81            | 391.22             |
| A_68_P28069090 | chr11:100480471-100480515                         | NM_019795:990            | Dnajc7     | INSIDE                 | 0.572                                                        | 0.689                          | 4194.67            | 2891.82            | 0.394                          | 3144.37            | 1239.33            |
| A_68_P23336240 | chr4:136390937-136390981                          | NM_010142:892            | Ephb2      | INSIDE                 | 0.572                                                        | 0.459                          | 1492.56            | 684.86             | 0.262                          | 1120.00            | 293.71             |
| A_68_P26567939 | chr9:61794038-61794082                            | NM_024245:546            | Kif23      | INSIDE                 | 0.572                                                        | 0.692                          | 1333.40            | 922.34             | 0.395                          | 1143.33            | 452.02             |
| A_68_P22818618 | chr4:32050821-32050865                            | NM_009316:-239           | Map3k7     | PROMOTER               | 0.572                                                        | 0.362                          | 2234.04            | 809.83             | 0.207                          | 1848.73            | 383.14             |
| A_68_P24643145 | chr6:92042439-92042483                            | NM_011630:1049           | Nr2c2      | INSIDE                 | 0.572                                                        | 0.443                          | 1697.54            | 752.66             | 0.254                          | 1205.20            | 305.84             |
| A_68_P26282994 | chr9:6168621-6168669                              | NM_027924:33             | Pdgd1      | INSIDE                 | 0.572                                                        | 0.493                          | 1583.15            | 781.21             | 0.282                          | 1232.96            | 348.13             |
| A_68_P30114432 | chr15:31383420-31383464                           | NM_145852:2              | Ropn11     | INSIDE                 | 0.572                                                        | 0.367                          | 1671.99            | 614.10             | 0.210                          | 1297.00            | 272.53             |
| A_68_P29937400 | chr14:118625343-118625387                         | NM_177753:10888          | Sox21      | DOWNSTREAM             | 0.572                                                        | 0.509                          | 1005.32            | 511.31             | 0.291                          | 804.61             | 233.91             |
| A_68_P32113659 | chr19:41281622-41281669                           | NM_011904:-381           | Tll2       | PROMOTER               | 0.572                                                        | 0.506                          | 1114.07            | 563.53             | 0.289                          | 704.58             | 203.69             |
| A_68_P28881066 | chr13:23461022-23461066                           | NM_001111107:27          | Zfp322a    | INSIDE                 | 0.572                                                        | 0.657                          | 2833.68            | 1861.60            | 0.376                          | 2303.79            | 866.40             |
| A_68_P30385945 | chr15:82818023-82818067                           | ENSMUST00000170562:4745  |            | INSIDE                 | 0.572                                                        | 0.469                          | 1347.10            | 631.13             | 0.268                          | 1008.23            | 270.29             |
| A_68_P29613716 | chr14:55305799-55305843                           | NM_001085473:-52         | Acin1      | PROMOTER               | 0.571                                                        | 0.413                          | 2027.70            | 837.31             | 0.236                          | 1701.80            | 400.98             |
| A_68_P24383760 | chr6:39523904-39523948                            | NM_178873:52             | Adek2      | INSIDE                 | 0.571                                                        | 0.606                          | 3931.43            | 2382.30            | 0.346                          | 2869.75            | 992.80             |
| A_68_P24056167 | chr5:123974295-123974339                          | NM_023232:-143           | Diablo     | PROMOTER               | 0.571                                                        | 0.484                          | 2310.52            | 1118.89            | 0.276                          | 1973.22            | 545.19             |
| A_68_P22311349 | chr3:87826614-87826658                            | NM_022031:4797           | Hapln2     | INSIDE                 | 0.571                                                        | 0.590                          | 1205.66            | 710.99             | 0.337                          | 1032.84            | 347.79             |
| A_68_P27185482 | chr10:61803237-61803281                           | NM_001146100:-89         | Hk1        | DIVERGENT_PROMOTER     | 0.571                                                        | 0.702                          | 1982.39            | 1390.70            | 0.400                          | 1654.77            | 662.31             |
| A_68_P20453279 | chr1:94998401-94998445                            | NM_001110315:20          | Kif1a      | INSIDE                 | 0.571                                                        | 0.610                          | 1585.84            | 967.91             | 0.348                          | 1191.72            | 414.97             |
| A_68_P29350210 | chr13:115880236-115880280                         | NM_134058:108            | Pelo       | INSIDE                 | 0.571                                                        | 0.428                          | 1365.78            | 584.99             | 0.244                          | 1293.53            | 316.15             |
| A_68_P27949792 | chr11:79404418-79404462                           | NM_175543:-273           | Rab11fip4  | PROMOTER               | 0.571                                                        | 0.648                          | 1053.99            | 683.13             | 0.370                          | 778.13             | 288.13             |
| A_68_P27096527 | chr10:42481255-42481299                           | NM_153055:-25            | Sec63      | PROMOTER               | 0.571                                                        | 0.585                          | 1212.18            | 709.24             | 0.334                          | 1047.00            | 349.96             |
| A_68_P24385310 | chr6:39822500-39822544                            |                          |            | Unknown                | 0.571                                                        | 0.529                          | 1931.19            | 1021.31            | 0.302                          | 1586.14            | 478.97             |
| A_68_P30925086 | chr16:84703745-84703789                           | ENSMUST00000164314:-9501 |            | PROMOTER               | 0.571                                                        | 0.673                          | 3861.79            | 2600.48            | 0.385                          | 3215.69            | 1236.75            |
| A_68_P21061285 | chr2:22924459-22924503                            | NM_001102437:-111        | Acbd5      | PROMOTER               | 0.570                                                        | 0.701                          | 2070.25            | 1452.17            | 0.400                          | 1512.58            | 604.66             |
| A_68_P26466977 | chr9:44127873-44127917                            | NM_027909:471            | C2cd2l     | INSIDE                 | 0.570                                                        | 0.627                          | 3836.44            | 2404.59            | 0.357                          | 2957.77            | 1055.85            |
| A_68_P24942889 | chr6:148893354-148893400                          | NM_019643:1578           | Fam60a     | INSIDE                 | 0.570                                                        | 0.544                          | 1192.04            | 648.66             | 0.310                          | 907.54             | 281.66             |
| A_68_P25661492 | chr8:12431084-12431128                            | NR_027975:45336          | Gm5607     | INSIDE                 | 0.570                                                        | 0.713                          | 3639.99            | 2594.08            | 0.406                          | 2677.83            | 1087.00            |
| A_68_P29071679 | chr13:58230820-58230864                           | NM_029872:-925           | Hnrpa0     | PROMOTER               | 0.570                                                        | 0.490                          | 1513.66            | 741.79             | 0.279                          | 1149.29            | 321.01             |
| A_68_P28067851 | chr11:100258744-100258788                         | NM_010593:338            | Jup        | INSIDE                 | 0.570                                                        | 0.483                          | 1464.57            | 706.93             | 0.275                          | 1199.55            | 330.09             |
| A_68_P28516077 | chr12:70825553-70825597                           | NM_145443:287            | L2hgdh     | INSIDE                 | 0.570                                                        | 0.620                          | 1226.48            | 760.61             | 0.354                          | 1048.37            | 370.75             |
| A_68_P20306026 | chr1:67085213-67085257                            | NM_001190984:174         | Lancel1    | INSIDE                 | 0.570                                                        | 0.592                          | 3031.06            | 1795.81            | 0.338                          | 2374.70            | 801.63             |
| A_68_P21571366 | chr2:119584202-119584246                          | NM_008523:37             | Ltk        | INSIDE                 | 0.570                                                        | 0.636                          | 1211.98            | 771.39             | 0.363                          | 1037.16            | 376.53             |
| A_68_P20449354 | chr1:94370335-94370379                            | NM_024197:-21            | Ndufa10    | PROMOTER               | 0.570                                                        | 0.602                          | 980.29             | 589.81             | 0.343                          | 669.35             | 229.49             |
| A_68_P20147268 | chr1:36326573-36326617                            | NM_153408:3676           | Neur13     | INSIDE                 | 0.570                                                        | 3.028                          | 2584.59            | 7827.19            | 1.726                          | 1746.11            | 3013.23            |
| A_68_P25528062 | chr7:138514868-138514912                          | NM_001039534:231         | Pstk       | INSIDE                 | 0.570                                                        | 0.612                          | 1795.30            | 1099.46            | 0.349                          | 1420.24            | 496.16             |
| A_68_P22858652 | chr4:40704660-40704704                            | NM_021535:236            | Smu1       | INSIDE                 | 0.570                                                        | 0.652                          | 2674.12            | 1742.33            | 0.372                          | 2167.75            | 805.33             |
| A_68_P21833056 | chr2:166821240-166821285                          | NM_001109905:516         | Stau1      | INSIDE                 | 0.570                                                        | 0.595                          | 1196.97            | 711.91             | 0.339                          | 986.92             | 334.35             |
| A_68_P31922242 | chr19:4282667-4282711                             | NM_026720:449            | Ankrd13d   | INSIDE                 | 0.569                                                        | 0.487                          | 1226.66            | 597.09             | 0.277                          | 847.48             | 234.89             |
| A_68_P29613437 | chr14:55259966-55260010                           | NM_199470:213            | Cdh24      | INSIDE                 | 0.569                                                        | 0.679                          | 3029.23            | 2055.85            | 0.386                          | 2450.58            | 945.95             |
| A_68_P25616318 | chr8:4166571-4166615                              | NM_001039578:26          | Evi5l      | INSIDE                 | 0.569                                                        | 0.727                          | 3763.31            | 2734.40            | 0.413                          | 3072.69            | 1269.57            |

| ProbeName      | Target position of probe on CpG island microarray | TargetID                | GeneSymbol    | CpG island Description | Ratio of relative methylation (TiO <sub>2</sub> -NP/Vehicle) | Sham group                     |                    |                    | TiO <sub>2</sub> -H group      |                    |                    |
|----------------|---------------------------------------------------|-------------------------|---------------|------------------------|--------------------------------------------------------------|--------------------------------|--------------------|--------------------|--------------------------------|--------------------|--------------------|
|                |                                                   |                         |               |                        |                                                              | Relative methylation (Cy5/Cy3) | Cy3 signal (Input) | Cy5 signal (MeDIP) | Relative methylation (Cy5/Cy3) | Cy3 signal (Input) | Cy5 signal (MeDIP) |
| A_68_P27810087 | chr11:54251592-54251636                           | NM_173753:-66           | Fnip1         | PROMOTER               | 0.569                                                        | 0.658                          | 2478.66            | 1632.10            | 0.375                          | 2100.32            | 787.14             |
| A_68_P20146390 | chr1:36161035-36161084                            | NM_015818:35815         | Hs6st1        | INSIDE                 | 0.569                                                        | 2.857                          | 777.68             | 2221.56            | 1.627                          | 582.83             | 948.01             |
| A_68_P26716013 | chr9:90009639-90009683                            | NM_001039147:-2         | Morf4l1       | PROMOTER               | 0.569                                                        | 0.544                          | 1835.28            | 998.48             | 0.310                          | 1452.06            | 449.68             |
| A_68_P31161702 | chr17:36053831-36053875                           | NM_175934:-3            | Ppp1r10       | DIVERGENT_PROMOTER     | 0.569                                                        | 0.672                          | 3400.04            | 2283.76            | 0.382                          | 2415.44            | 923.69             |
| A_68_P30574323 | chr16:17530866-17530910                           | NM_026909:257           | Thap7         | INSIDE                 | 0.569                                                        | 0.514                          | 1312.67            | 675.16             | 0.293                          | 1058.94            | 310.03             |
| A_68_P27469304 | chr10:114822217-114822261                         | NM_001033261:224        | Zfc3h1        | INSIDE                 | 0.569                                                        | 0.723                          | 1971.17            | 1424.91            | 0.411                          | 1642.50            | 675.30             |
| A_68_P26139677 | chr8:108939449-108939493                          | NM_011764:232           | Zfp90         | INSIDE                 | 0.569                                                        | 0.531                          | 1320.09            | 700.60             | 0.302                          | 1016.72            | 306.91             |
| A_68_P21533267 | chr2:113057089-113057133                          | ENSMUST00000099579:93   |               | INSIDE                 | 0.569                                                        | 0.611                          | 865.52             | 528.56             | 0.348                          | 790.99             | 275.02             |
| A_68_P27292892 | chr10:82085954-82085998                           | NM_001135567:-3         | 1190007107Rik | DIVERGENT_PROMOTER     | 0.568                                                        | 0.611                          | 1061.20            | 648.32             | 0.347                          | 864.90             | 300.19             |
| A_68_P31610612 | chr18:34166849-34166893                           | NM_013512:-10           | Epb4.114a     | PROMOTER               | 0.568                                                        | 0.602                          | 1215.32            | 731.69             | 0.342                          | 930.00             | 317.78             |
| A_68_P29671494 | chr14:65696542-65696586                           | NM_018788:20379         | Extl3         | INSIDE                 | 0.568                                                        | 2.377                          | 2904.76            | 6904.49            | 1.350                          | 2132.45            | 2879.37            |
| A_68_P22071616 | chr3:38786996-38787040                            | NM_183221:1157          | Fat4          | INSIDE                 | 0.568                                                        | 0.666                          | 1415.98            | 943.31             | 0.378                          | 1074.47            | 406.55             |
| A_68_P26467074 | chr9:44143508-44143552                            | NM_010436:733           | H2afx         | INSIDE                 | 0.568                                                        | 0.539                          | 1039.19            | 560.28             | 0.306                          | 869.37             | 266.17             |
| A_68_P22934416 | chr4:55543231-55543275                            | NM_010637:2095          | Klf4          | INSIDE                 | 0.568                                                        | 0.675                          | 1338.12            | 903.88             | 0.383                          | 1075.42            | 412.35             |
| A_68_P28206058 | chr12:5380617-5380662                             | NM_001164493:1849       | Klh129        | INSIDE                 | 0.568                                                        | 0.545                          | 1529.67            | 834.43             | 0.310                          | 1206.06            | 373.61             |
| A_68_P31625586 | chr18:36903899-36903943                           | NM_010885:282           | Ndufa2        | INSIDE                 | 0.568                                                        | 0.515                          | 1076.74            | 554.72             | 0.293                          | 943.88             | 276.09             |
| A_68_P32099500 | chr19:38172076-38172120                           | NM_181748:530           | O3far1        | INSIDE                 | 0.568                                                        | 0.513                          | 2719.67            | 1395.86            | 0.291                          | 2141.75            | 624.03             |
| A_68_P26640622 | chr9:74710098-74710142                            | NM_008262:393           | Onecut1       | INSIDE                 | 0.568                                                        | 0.691                          | 2058.51            | 1423.29            | 0.393                          | 1578.58            | 620.07             |
| A_68_P21831539 | chr2:166539726-166539770                          | NM_177782:-416          | Prex1         | PROMOTER               | 0.568                                                        | 0.452                          | 1321.79            | 597.79             | 0.257                          | 1027.42            | 263.70             |
| A_68_P31793418 | chr18:67883645-67883689                           | NM_001127177:609        | Ptpn2         | INSIDE                 | 0.568                                                        | 0.573                          | 2730.29            | 1565.13            | 0.326                          | 2353.85            | 766.35             |
| A_68_P23621603 | chr5:38952428-38952472                            | NM_011715:384           | Wdr1          | INSIDE                 | 0.568                                                        | 0.543                          | 1462.37            | 794.23             | 0.308                          | 1059.71            | 326.78             |
| A_68_P24118624 | chr5:136409884-136409928                          | NM_018871:605           | Ywhag         | INSIDE                 | 0.568                                                        | 0.668                          | 3287.17            | 2196.31            | 0.380                          | 2580.55            | 979.53             |
| A_68_P27674153 | chr11:29274024-29274068                           | NM_176841:272           | Ccdc88a       | INSIDE                 | 0.567                                                        | 0.537                          | 954.11             | 512.21             | 0.304                          | 822.91             | 250.40             |
| A_68_P25113816 | chr7:56890828-56890872                            | NM_001005232:1355       | Dbx1          | INSIDE                 | 0.567                                                        | 0.631                          | 828.80             | 522.87             | 0.358                          | 700.60             | 250.47             |
| A_68_P24131499 | chr5:139230499-139230543                          | NM_030565:-514          | Fam20c        | PROMOTER               | 0.567                                                        | 0.679                          | 1326.13            | 900.41             | 0.385                          | 1196.45            | 460.94             |
| A_68_P25828173 | chr8:46136798-46136846                            | NM_001081286:101261     | Fat1          | INSIDE                 | 0.567                                                        | 2.570                          | 2112.83            | 5429.90            | 1.457                          | 1471.99            | 2144.67            |
| A_68_P23145525 | chr4:99320580-99320624                            | NM_010425:-2387         | Foxd3         | PROMOTER               | 0.567                                                        | 0.458                          | 1131.51            | 518.60             | 0.260                          | 984.49             | 256.00             |
| A_68_P29952573 | chr14:121310169-121310213                         | NM_023579:-225          | Ipo5          | PROMOTER               | 0.567                                                        | 0.540                          | 973.95             | 525.93             | 0.306                          | 813.28             | 249.18             |
| A_68_P20744278 | chr1:158604428-158604472                          | NM_023141:20            | Tor3a         | INSIDE                 | 0.567                                                        | 0.435                          | 1221.33            | 531.24             | 0.247                          | 1085.85            | 267.91             |
| A_68_P30959118 | chr16:90810399-90810443                           | NM_029497:238           | Urb1          | INSIDE                 | 0.567                                                        | 0.716                          | 1794.66            | 1285.74            | 0.406                          | 1464.42            | 594.60             |
| A_68_P31669248 | chr18:44988658-44988702                           | NM_001163013:362        | Ythdc2        | INSIDE                 | 0.567                                                        | 0.428                          | 1645.12            | 704.73             | 0.243                          | 1200.46            | 291.34             |
| A_68_P28881184 | chr13:23488366-23488410                           | BC160303:76510          |               | INSIDE                 | 0.567                                                        | 0.438                          | 1520.84            | 666.28             | 0.248                          | 1293.95            | 321.54             |
| A_68_P27954544 | chr11:80291421-80291465                           | NM_009871:895           | Cdk5r1        | INSIDE                 | 0.566                                                        | 0.593                          | 1698.75            | 1008.11            | 0.336                          | 1220.56            | 409.99             |
| A_68_P22340673 | chr3:94590302-94590346                            | NM_001037711:113        | Cgn           | INSIDE                 | 0.566                                                        | 0.543                          | 4165.07            | 2260.24            | 0.307                          | 3089.59            | 948.51             |
| A_68_P25045003 | chr7:35461137-35461181                            | NM_175140:136572        | Chst8         | INSIDE                 | 0.566                                                        | 0.593                          | 1404.10            | 832.32             | 0.336                          | 1336.94            | 448.61             |
| A_68_P28684632 | chr12:102137444-102137488                         | NM_001177674:268        | Gpr68         | INSIDE                 | 0.566                                                        | 0.504                          | 2787.51            | 1405.18            | 0.285                          | 1916.13            | 546.92             |
| A_68_P28089853 | chr11:104094131-104094175                         | NM_001038609:1403       | Mapt          | INSIDE                 | 0.566                                                        | 0.580                          | 2669.04            | 1548.50            | 0.328                          | 1732.60            | 568.89             |
| A_68_P26885085 | chr9:121628083-121628127                          | NM_010918:-194          | Nktr          | PROMOTER               | 0.566                                                        | 0.471                          | 1500.13            | 706.12             | 0.267                          | 1164.19            | 310.30             |
| A_68_P28600137 | chr12:86113873-86113917                           | NM_023409:168           | Npc2          | INSIDE                 | 0.566                                                        | 0.524                          | 3879.45            | 2034.68            | 0.297                          | 3086.46            | 916.64             |
| A_68_P31256423 | chr17:56613777-56613821                           | NM_011218:2105          | Ptprs         | INSIDE                 | 0.566                                                        | 0.725                          | 2457.40            | 1782.69            | 0.411                          | 1862.73            | 764.70             |
| A_68_P27181743 | chr10:61143343-61143387                           | NM_009120:296           | Sar1a         | INSIDE                 | 0.566                                                        | 0.631                          | 2216.17            | 1399.40            | 0.358                          | 1667.68            | 596.47             |
| A_68_P30680167 | chr16:37384851-37384895                           | NM_001114611:172        | Stxbp5l       | INSIDE                 | 0.566                                                        | 0.629                          | 1870.26            | 1176.79            | 0.356                          | 1586.46            | 565.03             |
| A_68_P26814406 | chr9:108250276-108250320                          | NM_011678:137           | Usp4          | INSIDE                 | 0.566                                                        | 0.419                          | 1705.18            | 714.12             | 0.237                          | 1419.62            | 336.31             |
| A_68_P32542578 | chrX:92907030-92907074                            | NM_001034907:36         | Zc3h12b       | INSIDE                 | 0.566                                                        | 2.857                          | 1730.47            | 4944.09            | 1.617                          | 835.50             | 1351.21            |
| A_68_P22953710 | chr4:58956479-58956523                            | NM_001099323:1          | Zkscan16      | INSIDE                 | 0.566                                                        | 0.608                          | 1084.88            | 660.06             | 0.344                          | 862.70             | 296.98             |
| A_68_P28091216 | chr11:104330128-104330172                         | ENSMUST00000134266:-845 |               | PROMOTER               | 0.566                                                        | 0.399                          | 3790.75            | 1511.63            | 0.226                          | 3096.76            | 698.49             |
| A_68_P25737283 | chr8:28338782-28338826                            | NM_013462:1256          | Adrb3         | INSIDE                 | 0.565                                                        | 0.478                          | 1126.79            | 539.00             | 0.270                          | 883.04             | 238.86             |
| A_68_P26885914 | chr9:121748048-121748092                          | NM_028384:509           | Ccdc13        | INSIDE                 | 0.565                                                        | 0.632                          | 920.03             | 581.07             | 0.357                          | 657.55             | 234.52             |
| A_68_P31252978 | chr17:56098506-56098550                           | NM_028381:-81           | Ccdc94        | PROMOTER               | 0.565                                                        | 0.506                          | 1125.72            | 569.95             | 0.286                          | 834.62             | 238.95             |
| A_68_P27903934 | chr11:70832798-70832842                           | NM_033562:-55           | Derl2         | DIVERGENT_PROMOTER     | 0.565                                                        | 0.503                          | 2204.32            | 1108.27            | 0.284                          | 1714.27            | 486.74             |
| A_68_P26612686 | chr9:69609029-69609073                            | NM_022378:-303          | Foxb1         | PROMOTER               | 0.565                                                        | 0.672                          | 2272.22            | 1527.08            | 0.380                          | 1816.04            | 689.95             |

| ProbeName      | Target position of probe on CpG island microarray | TargetID               | GeneSymbol    | CpG island Description | Ratio of relative methylation (TiO <sub>2</sub> -NP/Vehicle) | Sham group                     |                    |                    | TiO <sub>2</sub> -H group      |                    |                    |
|----------------|---------------------------------------------------|------------------------|---------------|------------------------|--------------------------------------------------------------|--------------------------------|--------------------|--------------------|--------------------------------|--------------------|--------------------|
|                |                                                   |                        |               |                        |                                                              | Relative methylation (Cy5/Cy3) | Cy3 signal (Input) | Cy5 signal (MeDIP) | Relative methylation (Cy5/Cy3) | Cy3 signal (Input) | Cy5 signal (MeDIP) |
| A_68_P22010766 | chr3:27270872-27270916                            | NM_177330:622          | Ghnr          | INSIDE                 | 0.565                                                        | 0.694                          | 2020.63            | 1402.78            | 0.392                          | 1427.12            | 560.14             |
| A_68_P21311215 | chr2:69660694-69660738                            | NM_177784:290          | Klhl23        | INSIDE                 | 0.565                                                        | 0.647                          | 2109.52            | 1363.94            | 0.365                          | 1700.98            | 621.06             |
| A_68_P22693714 | chr4:3605437-3605481                              | NM_001111096:191       | Lyn           | INSIDE                 | 0.565                                                        | 0.542                          | 1002.80            | 543.31             | 0.306                          | 827.53             | 253.41             |
| A_68_P22356952 | chr3:97692829-97692873                            | NM_001039376:-220      | Pde4dip       | PROMOTER               | 0.565                                                        | 0.581                          | 1173.35            | 681.71             | 0.328                          | 892.32             | 292.93             |
| A_68_P23971131 | chr5:108741769-108741813                          | NM_001081234:-153      | Pigg          | PROMOTER               | 0.565                                                        | 0.577                          | 1542.46            | 889.51             | 0.326                          | 1240.48            | 403.92             |
| A_68_P21604382 | chr2:125548878-125548922                          | NM_199022:984          | Shc4          | INSIDE                 | 0.565                                                        | 0.409                          | 1504.09            | 614.77             | 0.231                          | 1178.89            | 272.42             |
| A_68_P24542639 | chr6:72566738-72566782                            | NM_009444:-18          | Tgolin2       | PROMOTER               | 0.565                                                        | 0.570                          | 1142.68            | 651.42             | 0.322                          | 947.30             | 305.29             |
| A_68_P25029683 | chr7:30836003-30836047                            | NM_011748:391          | Zfp14         | INSIDE                 | 0.565                                                        | 0.643                          | 1081.36            | 695.68             | 0.364                          | 755.83             | 274.92             |
| A_68_P32115177 | chr19:41557970-41558016                           | ENSMUST00000067795:866 |               | INSIDE                 | 0.565                                                        | 0.616                          | 1560.04            | 960.34             | 0.348                          | 1060.43            | 369.01             |
| A_68_P23297491 | chr4:129278370-129278414                          | NM_029748:442          | 2510006D16Rik | INSIDE                 | 0.564                                                        | 0.554                          | 1089.87            | 604.22             | 0.313                          | 906.89             | 283.60             |
| A_68_P20286847 | chr1:63493039-63493083                            | NM_001177600:583       | Adam23        | INSIDE                 | 0.564                                                        | 0.590                          | 2294.50            | 1354.14            | 0.333                          | 1842.08            | 612.75             |
| A_68_P23284269 | chr4:126921347-126921391                          | NM_030252:341          | BC003266      | INSIDE                 | 0.564                                                        | 0.460                          | 1692.80            | 778.92             | 0.260                          | 1393.23            | 361.55             |
| A_68_P27277825 | chr10:79076430-79076474                           | NM_198614:311          | C2cd4c        | INSIDE                 | 0.564                                                        | 0.342                          | 2022.44            | 691.42             | 0.193                          | 1722.39            | 331.93             |
| A_68_P21799027 | chr2:160935428-160935473                          | NM_173368:-658         | Chd6          | PROMOTER               | 0.564                                                        | 0.682                          | 1001.83            | 682.95             | 0.385                          | 776.01             | 298.51             |
| A_68_P25086655 | chr7:51560012-51560056                            | NM_009131:2295         | Clec11a       | INSIDE                 | 0.564                                                        | 0.584                          | 1693.26            | 988.26             | 0.329                          | 1372.86            | 451.94             |
| A_68_P24066887 | chr5:125914212-125914256                          | NM_203319:184          | Dhx37         | INSIDE                 | 0.564                                                        | 0.504                          | 2121.66            | 1068.58            | 0.284                          | 1769.97            | 503.12             |
| A_68_P20938879 | chr1:193399292-193399336                          | NM_029766:99           | Dtl           | INSIDE                 | 0.564                                                        | 0.410                          | 2542.52            | 1042.82            | 0.231                          | 1970.82            | 455.87             |
| A_68_P26804413 | chr9:106558146-106558190                          | NM_001160353:272       | Grm2          | INSIDE                 | 0.564                                                        | 0.574                          | 2025.33            | 1162.75            | 0.324                          | 1662.37            | 538.64             |
| A_68_P27095710 | chr10:42303461-42303505                           | NM_152229:-88          | Nr2e1         | PROMOTER               | 0.564                                                        | 0.594                          | 1771.51            | 1053.13            | 0.335                          | 1429.46            | 479.08             |
| A_68_P31713386 | chr18:53624258-53624302                           | NM_001033281:81        | Prdm6         | INSIDE                 | 0.564                                                        | 0.373                          | 2439.14            | 909.74             | 0.210                          | 1964.38            | 412.96             |
| A_68_P31253055 | chr17:56109896-56109940                           | NM_001159523:14        | Shd           | INSIDE                 | 0.564                                                        | 0.518                          | 4610.58            | 2387.13            | 0.292                          | 3559.17            | 1038.80            |
| A_68_P23618267 | chr5:38611613-38611657                            | NM_029162:33           | Zbtb49        | INSIDE                 | 0.564                                                        | 0.467                          | 1488.70            | 695.63             | 0.264                          | 1235.93            | 325.87             |
| A_68_P27532961 | chr10:126365502-126365546                         |                        |               | Unknown                | 0.564                                                        | 0.696                          | 1833.29            | 1275.77            | 0.392                          | 1719.39            | 674.83             |
| A_68_P27932458 | chr11:76308565-76308609                           | NM_198018:14335        | Abr           | INSIDE                 | 0.563                                                        | 0.513                          | 1670.04            | 856.81             | 0.289                          | 1335.96            | 385.79             |
| A_68_P28032140 | chr11:94189670-94189714                           | NM_146024:378          | Ankrd40       | INSIDE                 | 0.563                                                        | 0.532                          | 4088.05            | 2175.64            | 0.299                          | 2843.43            | 851.43             |
| A_68_P21631052 | chr2:130490403-130490447                          | NM_029832:-43          | Ddrk1         | DIVERGENT_PROMOTER     | 0.563                                                        | 0.664                          | 1731.04            | 1148.78            | 0.374                          | 1368.53            | 511.45             |
| A_68_P31099383 | chr17:24890123-24890167                           | NM_001012402:197       | Hs3st6        | INSIDE                 | 0.563                                                        | 0.630                          | 1409.88            | 887.85             | 0.354                          | 1160.29            | 411.09             |
| A_68_P25656225 | chr8:11557852-11557899                            | NM_011919:1810         | Ing1          | INSIDE                 | 0.563                                                        | 0.540                          | 1067.19            | 576.73             | 0.304                          | 871.63             | 265.32             |
| A_68_P20391723 | chr1:82288408-82288452                            | NM_010570:-416         | Irs1          | PROMOTER               | 0.563                                                        | 0.412                          | 1571.80            | 647.33             | 0.232                          | 1306.74            | 303.13             |
| A_68_P28513155 | chr12:70269942-70269986                           | NM_001081406:164       | Lrr1          | INSIDE                 | 0.563                                                        | 0.646                          | 1595.59            | 1030.61            | 0.364                          | 1213.98            | 441.28             |
| A_68_P22210465 | chr3:67319575-67319619                            | NM_001164763:-151      | Rarres1       | PROMOTER               | 0.563                                                        | 0.605                          | 1333.46            | 806.95             | 0.341                          | 1058.70            | 360.81             |
| A_68_P29502937 | chr14:30781713-30781757                           | NM_019979:169          | Selk          | INSIDE                 | 0.563                                                        | 0.654                          | 2837.27            | 1854.71            | 0.368                          | 2160.24            | 794.56             |
| A_68_P28185710 | chr11:120485805-120485849                         | NM_153056:490          | Sirt7         | INSIDE                 | 0.563                                                        | 0.544                          | 1310.04            | 712.60             | 0.306                          | 1028.17            | 314.88             |
| A_68_P22917598 | chr4:52452191-52452235                            | NM_008017:92           | Smc2          | INSIDE                 | 0.563                                                        | 0.530                          | 1960.76            | 1039.04            | 0.298                          | 1727.26            | 514.92             |
| A_68_P27689370 | chr11:32433541-32433585                           | NM_009288:297          | Stk10         | INSIDE                 | 0.563                                                        | 0.618                          | 1245.10            | 768.86             | 0.348                          | 942.19             | 327.51             |
| A_68_P24118491 | chr5:136387249-136387293                          | NM_018871:23241        | Ywhag         | INSIDE                 | 0.563                                                        | 2.731                          | 1500.76            | 4098.78            | 1.538                          | 1042.21            | 1602.46            |
| A_68_P32957266 | chr17:8477443-8477487                             | NM_018819:787          | Brp44l        | INSIDE                 | 0.562                                                        | 0.540                          | 2045.56            | 1104.06            | 0.304                          | 1646.50            | 499.84             |
| A_68_P20829088 | chr1:173610061-173610105                          | NM_007649:-2103        | Cd48          | PROMOTER               | 0.562                                                        | 2.889                          | 2481.68            | 7170.39            | 1.625                          | 2263.70            | 3677.64            |
| A_68_P24830594 | chr6:127030212-127030256                          | NM_022657:7315         | Fgf23         | INSIDE                 | 0.562                                                        | 0.643                          | 796.56             | 512.55             | 0.362                          | 643.98             | 232.88             |
| A_68_P28041927 | chr11:95868155-95868199                           | NM_009951:-918         | Igf2bp1       | PROMOTER               | 0.562                                                        | 0.548                          | 986.48             | 540.10             | 0.308                          | 926.11             | 284.97             |
| A_68_P32252897 | chrX:10295608-10295654                            | NM_001166635:1140      | Mid1ip1       | INSIDE                 | 0.562                                                        | 0.691                          | 1207.34            | 834.01             | 0.388                          | 552.43             | 214.53             |
| A_68_P21842485 | chr2:168426812-168426856                          | NM_001037178:321       | Nfatc2        | INSIDE                 | 0.562                                                        | 0.424                          | 1492.40            | 632.27             | 0.238                          | 1299.45            | 309.63             |
| A_68_P23057181 | chr4:82151702-82151757                            | NM_001113209:-517      | Nfib          | PROMOTER               | 0.562                                                        | 0.645                          | 1116.94            | 719.93             | 0.363                          | 898.38             | 325.68             |
| A_68_P28058441 | chr11:98635083-98635127                           | NM_145434:1452         | Nr1d1         | INSIDE                 | 0.562                                                        | 0.495                          | 1093.90            | 541.80             | 0.278                          | 1028.08            | 286.08             |
| A_68_P25377819 | chr7:109384967-109385014                          | NM_145583:13403        | Pgap2         | INSIDE                 | 0.562                                                        | 2.859                          | 888.88             | 2541.17            | 1.608                          | 785.22             | 1262.72            |
| A_68_P20029520 | chr1:10983953-10983997                            | NM_029525:429          | Prex2         | INSIDE                 | 0.562                                                        | 0.439                          | 1493.77            | 655.96             | 0.247                          | 1230.28            | 303.83             |
| A_68_P26588674 | chr9:65477102-65477146                            | NM_028030:-1264        | Rbpms2        | PROMOTER               | 0.562                                                        | 0.542                          | 1527.94            | 828.87             | 0.305                          | 1209.09            | 368.88             |
| A_68_P22044439 | chr3:33698918-33698962                            | NM_025978:-176         | Tic14         | PROMOTER               | 0.562                                                        | 0.275                          | 2184.87            | 601.13             | 0.155                          | 1810.25            | 279.75             |
| A_68_P24002094 | chr5:114581485-114581529                          | NM_011677:342          | Ung           | INSIDE                 | 0.562                                                        | 0.697                          | 2466.04            | 1718.55            | 0.391                          | 1766.12            | 691.36             |
| A_68_P23237068 | chr4:117559980-117560024                          | NM_033617:-68          | Atp6v0b       | PROMOTER               | 0.561                                                        | 0.520                          | 3287.93            | 1710.73            | 0.292                          | 2579.57            | 752.50             |
| A_68_P24142832 | chr5:141180716-141180760                          | NM_172724:-238         | Baat1         | DIVERGENT_PROMOTER     | 0.561                                                        | 0.612                          | 2843.49            | 1739.02            | 0.343                          | 2029.52            | 696.21             |

| ProbeName      | Target position of probe on CpG island microarray | TargetID                 | GeneSymbol    | CpG island Description | Ratio of relative methylation (TiO <sub>2</sub> -NP/Vehicle) | Sham group                     |                    |                    | TiO <sub>2</sub> -H group      |                    |                    |
|----------------|---------------------------------------------------|--------------------------|---------------|------------------------|--------------------------------------------------------------|--------------------------------|--------------------|--------------------|--------------------------------|--------------------|--------------------|
|                |                                                   |                          |               |                        |                                                              | Relative methylation (Cy5/Cy3) | Cy3 signal (Input) | Cy5 signal (MeDIP) | Relative methylation (Cy5/Cy3) | Cy3 signal (Input) | Cy5 signal (MeDIP) |
| A_68_P29941246 | chr14:119254241-119254285                         | NM_001160099-91          | Cldn10        | INSIDE                 | 0.561                                                        | 0.580                          | 1588.08            | 921.60             | 0.325                          | 1242.28            | 404.29             |
| A_68_P21823222 | chr2:165151741-165151785                          | NM_207705-9369           | Elmo2         | PROMOTER               | 0.561                                                        | 0.563                          | 2297.23            | 1293.88            | 0.316                          | 1698.80            | 536.64             |
| A_68_P25730814 | chr8:27229164-27229208                            | NM_207659-510            | Hook3         | INSIDE                 | 0.561                                                        | 0.465                          | 1832.79            | 852.16             | 0.261                          | 1488.23            | 388.33             |
| A_68_P30146826 | chr15:37890566-37890610                           | NM_199476:222            | Rrm2b         | INSIDE                 | 0.561                                                        | 0.592                          | 2331.50            | 1379.43            | 0.332                          | 1642.59            | 545.08             |
| A_68_P30489324 | chr15:100883675-100883719                         | NM_011323:116995         | Scn8a         | DOWNSTREAM             | 0.561                                                        | 0.627                          | 1675.76            | 1050.43            | 0.352                          | 1580.13            | 556.04             |
| A_68_P28224317 | chr12:8778225-8778269                             | NM_011519:45             | Sdc1          | INSIDE                 | 0.561                                                        | 0.563                          | 2360.37            | 1329.96            | 0.316                          | 1718.40            | 543.22             |
| A_68_P27915644 | chr11:72991108-72991152                           | NM_029564:546            | Tax1bp3       | INSIDE                 | 0.561                                                        | 0.614                          | 1118.93            | 687.16             | 0.344                          | 937.63             | 322.86             |
| A_68_P30580619 | chr16:18589104-18589148                           | NM_011532:-2064          | Tbx1          | PROMOTER               | 0.561                                                        | 0.697                          | 2396.69            | 1671.42            | 0.391                          | 1860.59            | 727.67             |
| A_68_P21070952 | chr2:25118487-25118531                            | NM_175286:391            | Tprm          | INSIDE                 | 0.561                                                        | 0.472                          | 2594.30            | 1223.22            | 0.264                          | 1909.58            | 505.07             |
| A_68_P25355274 | chr7:105509904-105509948                          | NM_001168539:-88         | Tsku          | PROMOTER               | 0.561                                                        | 0.488                          | 1169.56            | 570.41             | 0.273                          | 1020.35            | 279.06             |
| A_68_P31403191 | chr17:84585735-84585779                           | NM_001001806:1531        | Zfp3612       | INSIDE                 | 0.561                                                        | 0.595                          | 1047.30            | 623.28             | 0.334                          | 877.89             | 293.28             |
| A_68_P23204069 | chr4:109723823-109723867                          |                          | Unknown       |                        | 0.561                                                        | 0.482                          | 2207.85            | 1065.21            | 0.271                          | 1683.30            | 456.01             |
| A_68_P24377801 | chr6:38484955-38484999                            | NM_025363:116            | 1110001J03Rik | INSIDE                 | 0.560                                                        | 0.622                          | 1455.55            | 905.08             | 0.348                          | 1209.77            | 421.18             |
| A_68_P31609276 | chr18:33954463-33954507                           | NR_038151:-61            | 2410004N09Rik | PROMOTER               | 0.560                                                        | 0.719                          | 2316.79            | 1666.26            | 0.403                          | 1838.05            | 739.95             |
| A_68_P21081717 | chr2:26865712-26865756                            | NM_029862:249            | 5930434B04Rik | INSIDE                 | 0.560                                                        | 0.488                          | 1458.96            | 711.61             | 0.273                          | 1037.33            | 283.46             |
| A_68_P24618848 | chr6:87863953-87863997                            | NM_173737:5              | 8430410A17Rik | INSIDE                 | 0.560                                                        | 0.378                          | 2092.85            | 790.05             | 0.211                          | 1739.85            | 367.76             |
| A_68_P28181983 | chr11:119908193-119908237                         | NM_001198787:-5119       | Aatk          | PROMOTER               | 0.560                                                        | 0.701                          | 2711.60            | 1901.38            | 0.393                          | 2101.40            | 825.63             |
| A_68_P21741662 | chr2:150730240-150730284                          | NM_024465:205            | Abhd12        | INSIDE                 | 0.560                                                        | 0.552                          | 1913.46            | 1055.45            | 0.309                          | 1584.74            | 489.26             |
| A_68_P25276874 | chr7:89484048-89484092                            | NM_001190374:-133        | Adams13       | PROMOTER               | 0.560                                                        | 46.465                         | 529.23             | 24590.75           | 26.006                         | 626.01             | 16279.64           |
| A_68_P21901918 | chr2:179906691-179906735                          | NM_019822:420            | Adrm1         | INSIDE                 | 0.560                                                        | 0.711                          | 1492.54            | 1061.72            | 0.399                          | 1260.83            | 502.47             |
| A_68_P24798990 | chr6:120481585-120481629                          | NM_144815:-289           | Cecr5         | PROMOTER               | 0.560                                                        | 0.325                          | 1978.65            | 643.44             | 0.182                          | 1646.51            | 299.76             |
| A_68_P23979845 | chr5:110877631-110877675                          | NM_001142642:-130        | Fbrs1         | PROMOTER               | 0.560                                                        | 0.631                          | 2505.81            | 1581.38            | 0.354                          | 1994.69            | 705.30             |
| A_68_P22924772 | chr4:53727484-53727528                            | NM_139309:453            | Fktn          | INSIDE                 | 0.560                                                        | 0.679                          | 1666.83            | 1132.53            | 0.381                          | 1370.51            | 521.66             |
| A_68_P26683680 | chr9:83341498-83341543                            | NM_029434:-6786          | Lca5          | PROMOTER               | 0.560                                                        | 0.624                          | 910.87             | 568.13             | 0.349                          | 741.85             | 258.92             |
| A_68_P22683294 | chr3:157699823-157699867                          | NM_024194:178            | Lrre40        | INSIDE                 | 0.560                                                        | 0.487                          | 2499.03            | 1217.62            | 0.273                          | 2043.10            | 557.29             |
| A_68_P23946409 | chr5:103854106-103854150                          | NM_011204:-82            | Ptpn13        | PROMOTER               | 0.560                                                        | 0.619                          | 1473.05            | 912.23             | 0.347                          | 1290.53            | 447.50             |
| A_68_P24156971 | chr5:144288853-144288897                          | NM_009007:-13            | Rac1          | PROMOTER               | 0.560                                                        | 0.666                          | 2639.95            | 1758.58            | 0.373                          | 1981.84            | 738.77             |
| A_68_P24170389 | chr5:147656737-147656781                          | NM_026864:112            | Ras11a        | INSIDE                 | 0.560                                                        | 0.649                          | 1181.89            | 767.18             | 0.364                          | 1037.70            | 377.39             |
| A_68_P27682716 | chr11:31269467-31269511                           | NM_011491:573            | Ste2          | INSIDE                 | 0.560                                                        | 0.561                          | 1058.09            | 594.10             | 0.314                          | 903.97             | 284.24             |
| A_68_P22728295 | chr4:11083786-11083830                            | NM_001199105:221         | Trp53inp1     | INSIDE                 | 0.560                                                        | 0.563                          | 1881.95            | 1060.08            | 0.316                          | 1447.62            | 457.02             |
| A_68_P21555162 | chr2:116801525-116801569                          | ENSMUST00000083860:-7637 |               | PROMOTER               | 0.560                                                        | 0.521                          | 1151.20            | 599.45             | 0.291                          | 928.06             | 270.45             |
| A_68_P23331579 | chr4:135543347-135543391                          |                          | 1110049F12Rik | PROMOTER               | 0.559                                                        | 0.640                          | 1505.82            | 963.38             | 0.358                          | 1300.10            | 465.03             |
| A_68_P23154898 | chr4:101092046-101092090                          | NM_009647:-239           | Ak4           | PROMOTER               | 0.559                                                        | 0.389                          | 1620.81            | 630.52             | 0.218                          | 1481.13            | 322.15             |
| A_68_P27392329 | chr10:99950462-99950506                           | NM_146009:-438           | Cep290        | DIVERGENT_PROMOTER     | 0.559                                                        | 0.337                          | 1814.92            | 610.94             | 0.188                          | 1345.69            | 253.04             |
| A_68_P30895376 | chr16:78302422-78302466                           | NM_001025192:509         | Cxadr         | INSIDE                 | 0.559                                                        | 0.599                          | 1035.41            | 619.77             | 0.334                          | 734.45             | 245.67             |
| A_68_P25952525 | chr8:73063833-73063877                            | NM_007924:281            | Eil1          | INSIDE                 | 0.559                                                        | 0.535                          | 1118.59            | 598.08             | 0.299                          | 918.35             | 274.41             |
| A_68_P27541867 | chr10:127962642-127962686                         | NM_011843:251            | Esyt1         | INSIDE                 | 0.559                                                        | 0.577                          | 1870.60            | 1080.15            | 0.323                          | 1422.16            | 459.21             |
| A_68_P24326457 | chr6:29383678-29383722                            | NM_001081185:548         | Flncl         | INSIDE                 | 0.559                                                        | 0.668                          | 1801.03            | 1203.76            | 0.373                          | 1262.17            | 471.32             |
| A_68_P21572765 | chr2:119853360-119853404                          | NM_001114637:164         | Jmjd7         | INSIDE                 | 0.559                                                        | 0.471                          | 1169.44            | 550.26             | 0.263                          | 993.44             | 261.09             |
| A_68_P25423373 | chr7:119369629-119369673                          | NM_001193305:301         | Mical2        | INSIDE                 | 0.559                                                        | 0.707                          | 2118.24            | 1496.69            | 0.395                          | 1671.64            | 660.13             |
| A_68_P24119914 | chr5:136674559-136674603                          | NM_025774:244            | Prkrip1       | INSIDE                 | 0.559                                                        | 0.609                          | 2183.08            | 1330.26            | 0.341                          | 1509.25            | 514.25             |
| A_68_P26540098 | chr9:56924586-56924630                            | NM_001110350:426         | Sin3a         | INSIDE                 | 0.559                                                        | 0.712                          | 3459.83            | 2462.91            | 0.398                          | 2827.68            | 1125.53            |
| A_68_P21826274 | chr2:165671183-165671231                          | NM_027230:38982          | Zmynd8        | INSIDE                 | 0.559                                                        | 4.337                          | 1961.36            | 8505.97            | 2.425                          | 1400.38            | 3396.47            |
| A_68_P30977032 | chr16:93683403-93683447                           | NM_173047:-39            | Cbr3          | PROMOTER               | 0.558                                                        | 0.567                          | 1827.85            | 1036.24            | 0.316                          | 1438.18            | 454.79             |
| A_68_P28143856 | chr11:113613201-113613245                         | NM_001163346:-93         | Cdc42ep4      | PROMOTER               | 0.558                                                        | 0.674                          | 1217.12            | 820.91             | 0.376                          | 970.52             | 364.96             |
| A_68_P26505085 | chr9:50507371-50507415                            | NM_178118:28697          | Dixdc1        | INSIDE                 | 0.558                                                        | 0.489                          | 1050.32            | 513.12             | 0.273                          | 769.66             | 209.88             |
| A_68_P21727904 | chr2:147870499-147870543                          | NM_010446:2185           | Foxa2         | INSIDE                 | 0.558                                                        | 0.632                          | 2231.15            | 1409.17            | 0.353                          | 1644.72            | 580.08             |
| A_68_P25737190 | chr8:28317205-28317249                            | NM_029674:-4207          | Got111        | PROMOTER               | 0.558                                                        | 0.709                          | 1356.61            | 961.52             | 0.396                          | 1032.68            | 408.54             |
| A_68_P28997649 | chr13:44825063-44825107                           | NM_001205044:-1058       | Jarid2        | PROMOTER               | 0.558                                                        | 0.532                          | 2829.26            | 1504.07            | 0.297                          | 2181.41            | 647.35             |
| A_68_P29842694 | chr14:99697586-99697630                           | NM_009769:-301           | Klf5          | PROMOTER               | 0.558                                                        | 0.555                          | 2008.47            | 1115.62            | 0.310                          | 1623.46            | 502.74             |
| A_68_P25016725 | chr7:28115897-28115945                            | NM_001113549:2747        | Ltbp4         | INSIDE                 | 0.558                                                        | 0.616                          | 1201.99            | 740.92             | 0.344                          | 1039.46            | 357.39             |

| ProbeName      | Target position of probe on CpG island microarray | TargetID                | GeneSymbol    | CpG island Description | Ratio of relative methylation (TiO <sub>2</sub> -NP/Vehicle) | Sham group                     |                    |                    | TiO <sub>2</sub> -H group      |                    |                    |
|----------------|---------------------------------------------------|-------------------------|---------------|------------------------|--------------------------------------------------------------|--------------------------------|--------------------|--------------------|--------------------------------|--------------------|--------------------|
|                |                                                   |                         |               |                        |                                                              | Relative methylation (Cy5/Cy3) | Cy3 signal (Input) | Cy5 signal (MeDIP) | Relative methylation (Cy5/Cy3) | Cy3 signal (Input) | Cy5 signal (MeDIP) |
| A_68_P30424508 | chr15:89145163-89145207                           | NM_001081030:558        | Sbf1          | INSIDE                 | 0.558                                                        | 0.538                          | 1198.03            | 644.62             | 0.300                          | 1067.07            | 320.46             |
| A_68_P24044263 | chr5:121835304-121835348                          | NM_001163470:298        | Traf1         | INSIDE                 | 0.558                                                        | 0.489                          | 1698.87            | 830.23             | 0.273                          | 1368.54            | 373.35             |
| A_68_P26947989 | chr10:12588953-12588997                           | NM_011682:-7441         | Utrn          | PROMOTER               | 0.558                                                        | 0.531                          | 974.37             | 517.69             | 0.296                          | 848.90             | 251.55             |
| A_68_P25954145 | A_68_P25954145                                    |                         | Unknown       | Unknown                | 0.558                                                        | 0.568                          | 1583.85            | 899.80             | 0.317                          | 1109.55            | 351.82             |
| A_68_P27992494 | chr11:86900082-86900126                           | NM_024262:175           | 1200011M11Rik | INSIDE                 | 0.557                                                        | 0.685                          | 3633.35            | 2489.28            | 0.381                          | 2646.03            | 1009.26            |
| A_68_P21147278 | chr2:38142391-38142435                            | NM_146122:492           | Dennd1a       | INSIDE                 | 0.557                                                        | 0.697                          | 4186.41            | 2917.72            | 0.388                          | 3094.62            | 1200.72            |
| A_68_P30156152 | chr15:39688848-39688892                           | NM_022722:146           | Dpys          | INSIDE                 | 0.557                                                        | 0.581                          | 1804.16            | 1048.81            | 0.324                          | 1202.43            | 389.35             |
| A_68_P20834313 | chr1:174563103-174563147                          | NM_026725:-19           | Dusp23        | PROMOTER               | 0.557                                                        | 0.482                          | 1550.12            | 747.21             | 0.268                          | 1209.27            | 324.62             |
| A_68_P28175187 | chr11:118861087-118861131                         | NM_001030291:11607      | Enpp7         | DOWNSTREAM             | 0.557                                                        | 0.558                          | 1312.41            | 732.47             | 0.311                          | 959.99             | 298.16             |
| A_68_P25023220 | chr7:29501806-29501850                            | NM_015796:20            | Fbxo17        | INSIDE                 | 0.557                                                        | 0.656                          | 1623.49            | 1064.23            | 0.365                          | 1443.82            | 527.31             |
| A_68_P29484663 | chr14:27852219-27852263                           | NM_134437:54            | Il17rd        | INSIDE                 | 0.557                                                        | 0.516                          | 1253.38            | 646.71             | 0.287                          | 1027.00            | 295.15             |
| A_68_P20566309 | chr1:123224172-123224218                          | NM_133748:145           | Insig2        | INSIDE                 | 0.557                                                        | 0.487                          | 1336.67            | 651.27             | 0.272                          | 1040.86            | 282.63             |
| A_68_P21345534 | chr2:75542163-75542207                            | NM_010902:514           | Nfe2l2        | INSIDE                 | 0.557                                                        | 0.483                          | 2548.48            | 1229.88            | 0.269                          | 2074.48            | 557.51             |
| A_68_P25956587 | chr8:73900036-73900080                            | NM_010150:5793          | Nr2f6         | INSIDE                 | 0.557                                                        | 0.568                          | 1405.79            | 798.22             | 0.316                          | 1202.23            | 380.34             |
| A_68_P27265099 | chr10:76424280-76424324                           | NM_021568:390           | Pcbp3         | INSIDE                 | 0.557                                                        | 0.670                          | 1142.64            | 765.24             | 0.373                          | 972.69             | 362.62             |
| A_68_P27924766 | chr11:75007358-75007402                           | NM_177708:-114          | Rtn4r1        | DIVERGENT_PROMOTER     | 0.557                                                        | 0.556                          | 1115.18            | 619.93             | 0.310                          | 883.17             | 273.44             |
| A_68_P26454290 | chr9:42072563-42072607                            | NM_172769:-201          | Sc5d          | PROMOTER               | 0.557                                                        | 0.466                          | 2173.31            | 1012.46            | 0.259                          | 1775.26            | 460.30             |
| A_68_P24046791 | chr5:122286329-122286373                          | NM_008507:460           | Sh2b3         | INSIDE                 | 0.557                                                        | 0.520                          | 1493.26            | 776.52             | 0.290                          | 1281.16            | 371.15             |
| A_68_P31097896 | chr17:24664666-24664710                           | NM_001172113:195        | Traf7         | INSIDE                 | 0.557                                                        | 0.341                          | 5166.04            | 1761.38            | 0.190                          | 3885.73            | 738.42             |
| A_68_P24397781 | chr6:42299527-42299571                            | NM_011777:-278          | Zyx           | PROMOTER               | 0.557                                                        | 0.595                          | 988.78             | 588.11             | 0.331                          | 793.73             | 262.99             |
| A_68_P21710707 | chr2:144993216-144993260                          | ENSMUST00000110007:-251 |               | PROMOTER               | 0.557                                                        | 0.439                          | 1459.90            | 641.05             | 0.245                          | 1295.40            | 316.87             |
| A_68_P20861819 | chr1:179726176-179726220                          | NM_007422:442           | Adss          | INSIDE                 | 0.556                                                        | 0.534                          | 1026.39            | 548.56             | 0.297                          | 842.72             | 250.47             |
| A_68_P21073309 | chr2:25463281-25463325                            | NM_001024616:664        | B230208H17Rik | INSIDE                 | 0.556                                                        | 0.422                          | 1283.25            | 541.75             | 0.235                          | 1017.19            | 238.59             |
| A_68_P26127081 | chr8:106695023-106695067                          | NM_001141922:632        | Bean1         | INSIDE                 | 0.556                                                        | 0.638                          | 1363.79            | 870.38             | 0.355                          | 1289.77            | 458.06             |
| A_68_P22449310 | chr3:116126022-116126067                          | NM_001080818:906        | Cdc14a        | INSIDE                 | 0.556                                                        | 0.599                          | 1344.64            | 805.42             | 0.333                          | 1127.01            | 375.04             |
| A_68_P21822538 | chr2:165059682-165059726                          | NM_174988:533           | Cdh22         | INSIDE                 | 0.556                                                        | 0.576                          | 2327.71            | 1341.58            | 0.320                          | 1922.96            | 615.69             |
| A_68_P26238593 | chr8:125749038-125749082                          | NM_194444:320           | Cdk10         | INSIDE                 | 0.556                                                        | 0.520                          | 1983.84            | 1032.21            | 0.289                          | 1550.55            | 448.44             |
| A_68_P22340672 | chr3:94590209-94590253                            | NM_00103771:207         | Cgn           | INSIDE                 | 0.556                                                        | 0.730                          | 1766.28            | 1288.82            | 0.406                          | 1252.38            | 508.07             |
| A_68_P25051005 | chr7:36539482-36539526                            | NM_178704:-31           | Dpy19l3       | PROMOTER               | 0.556                                                        | 0.541                          | 2558.75            | 1384.64            | 0.301                          | 2077.84            | 624.93             |
| A_68_P27897957 | chr11:69734148-69734192                           | NM_001166590:-38        | Eif5a         | PROMOTER               | 0.556                                                        | 0.655                          | 936.87             | 613.40             | 0.364                          | 849.72             | 309.06             |
| A_68_P26213863 | chr8:121868494-121868539                          | NM_024219:79            | Hspb1         | INSIDE                 | 0.556                                                        | 0.491                          | 1489.62            | 730.74             | 0.273                          | 1214.04            | 330.94             |
| A_68_P29613305 | chr14:55236808-55236852                           | NR_030457:-1208         | Mir686        | PROMOTER               | 0.556                                                        | 0.656                          | 1403.16            | 919.91             | 0.365                          | 1204.35            | 439.34             |
| A_68_P20877311 | chr1:182627122-182627166                          | NM_013729:21            | Mix1          | INSIDE                 | 0.556                                                        | 0.675                          | 5597.45            | 3780.38            | 0.375                          | 4215.78            | 1582.74            |
| A_68_P24974337 | chr7:13629455-13629499                            | NM_145819:10637         | Mzf1          | INSIDE                 | 0.556                                                        | 0.460                          | 1369.40            | 629.44             | 0.255                          | 1254.65            | 320.46             |
| A_68_P23575729 | chr5:31262539-31262583                            | NM_016703:174           | Preb          | INSIDE                 | 0.556                                                        | 0.435                          | 1957.97            | 852.60             | 0.242                          | 1574.30            | 381.42             |
| A_68_P22405717 | chr3:107136584-107136628                          | NM_001045807:-399       | Rbm15         | PROMOTER               | 0.556                                                        | 0.481                          | 1819.97            | 875.19             | 0.267                          | 1356.02            | 362.69             |
| A_68_P32113650 | chr19:41280684-41280728                           | NM_011904:558           | Thl2          | INSIDE                 | 0.556                                                        | 0.416                          | 2341.26            | 973.11             | 0.231                          | 1880.05            | 434.34             |
| A_68_P29730260 | chr14:76244587-76244631                           | NM_009429:-454          | Tpt1          | PROMOTER               | 0.556                                                        | 0.620                          | 1882.04            | 1166.11            | 0.345                          | 1509.21            | 519.98             |
| A_68_P25615117 | chr8:3676454-3676498                              | NM_025701:0             | Trappc5       | INSIDE                 | 0.556                                                        | 0.418                          | 1651.13            | 689.43             | 0.232                          | 1207.39            | 280.25             |
| A_68_P27854524 | chr11:62364466-62364510                           | NM_011664:-517          | Ubb           | PROMOTER               | 0.556                                                        | 0.626                          | 3728.27            | 2333.43            | 0.348                          | 2821.54            | 981.17             |
| A_68_P23548555 | chr5:25211490-25211534                            | NM_020570:103           | Xrcc2         | INSIDE                 | 0.556                                                        | 0.450                          | 1279.43            | 575.45             | 0.250                          | 1054.18            | 263.46             |
| A_68_P22283291 | chr3:82932267-82932311                            | ENSMUST00000047876:880  |               | INSIDE                 | 0.556                                                        | 0.432                          | 2029.46            | 876.27             | 0.240                          | 1548.71            | 372.00             |
| A_68_P32054915 | chr19:29880098-29880142                           | NM_172836:379           | 9930021103Rik | INSIDE                 | 0.555                                                        | 0.614                          | 866.77             | 532.58             | 0.341                          | 733.85             | 250.22             |
| A_68_P24172965 | chr5:148116273-148116317                          | NM_007673:2531          | Cdx2          | INSIDE                 | 0.555                                                        | 0.566                          | 1928.69            | 1091.83            | 0.314                          | 1504.76            | 472.42             |
| A_68_P28833516 | chr13:13485759-13485803                           | NM_031999:111           | Gpr137b       | INSIDE                 | 0.555                                                        | 0.623                          | 1968.81            | 1226.19            | 0.346                          | 1665.85            | 575.57             |
| A_68_P30424715 | chr15:89185807-89185851                           | NM_178919:262           | Lmf2          | INSIDE                 | 0.555                                                        | 0.665                          | 1547.05            | 1028.76            | 0.369                          | 1238.97            | 457.63             |
| A_68_P20799114 | chr1:168169051-168169095                          | NM_175296:-197          | Mael          | PROMOTER               | 0.555                                                        | 3.213                          | 4234.87            | 13605.29           | 1.784                          | 3466.50            | 6184.25            |
| A_68_P31127302 | chr17:29459217-29459261                           | NM_023734:3412          | Pil6          | INSIDE                 | 0.555                                                        | 2.465                          | 2975.74            | 7336.30            | 1.369                          | 1879.24            | 2572.35            |
| A_68_P22774390 | chr4:21616242-21616286                            | NM_001080771:-3154      | Prdm13        | PROMOTER               | 0.555                                                        | 0.433                          | 1791.33            | 775.75             | 0.240                          | 1502.19            | 361.15             |
| A_68_P23233186 | chr4:116924691-116924735                          | NM_026837:119           | Tmem53        | INSIDE                 | 0.555                                                        | 0.523                          | 1081.98            | 565.55             | 0.290                          | 914.03             | 265.04             |
| A_68_P31259988 | chr17:57226985-57227029                           | NM_009451:199           | Tubb4         | INSIDE                 | 0.555                                                        | 0.642                          | 1049.31            | 673.97             | 0.357                          | 849.33             | 302.91             |

| ProbeName      | Target position of probe on CpG island microarray | TargetID                | GeneSymbol    | CpG island Description | Ratio of relative methylation (TiO <sub>2</sub> -NP/Vehicle) | Sham group                     |                    |                    | TiO <sub>2</sub> -H group      |                    |                    |
|----------------|---------------------------------------------------|-------------------------|---------------|------------------------|--------------------------------------------------------------|--------------------------------|--------------------|--------------------|--------------------------------|--------------------|--------------------|
|                |                                                   |                         |               |                        |                                                              | Relative methylation (Cy5/Cy3) | Cy3 signal (Input) | Cy5 signal (MeDIP) | Relative methylation (Cy5/Cy3) | Cy3 signal (Input) | Cy5 signal (MeDIP) |
| A_68_P23694951 | chr5:52862528-52862572                            |                         |               | Unknown                | 0.555                                                        | 0.485                          | 2330.56            | 1131.04            | 0.269                          | 1806.00            | 486.70             |
| A_68_P26595472 | chr9:66682802-66682846                            | NM_026674:-311          | Aph1c         | PROMOTER               | 0.554                                                        | 0.564                          | 2116.14            | 1193.05            | 0.312                          | 1592.91            | 497.13             |
| A_68_P28104944 | chr11:106911768-106911812                         | NM_176850:81446         | Bptf          | INSIDE                 | 0.554                                                        | 2.532                          | 46344.44           | 117337.80          | 1.402                          | 36795.29           | 51603.19           |
| A_68_P23222744 | chr4:114659711-114659755                          | NM_025647:101           | Cmpk1         | INSIDE                 | 0.554                                                        | 0.469                          | 2116.44            | 992.63             | 0.260                          | 1720.59            | 446.81             |
| A_68_P28737539 | chr12:111516074-111516118                         | NR_002866:182           | Dio3os        | INSIDE                 | 0.554                                                        | 0.557                          | 1383.04            | 769.67             | 0.308                          | 1133.20            | 349.36             |
| A_68_P22343254 | chr3:95087394-95087438                            | NM_133858:560           | Fam63a        | INSIDE                 | 0.554                                                        | 0.511                          | 1412.47            | 721.45             | 0.283                          | 1056.22            | 298.82             |
| A_68_P28751073 | chr12:113827105-113827149                         | NM_198411:132           | Inf2          | INSIDE                 | 0.554                                                        | 0.528                          | 1145.20            | 604.34             | 0.292                          | 902.36             | 263.67             |
| A_68_P24284102 | chr6:21164876-21164920                            | NM_019697:-1210         | Kcnd2         | PROMOTER               | 0.554                                                        | 0.595                          | 1729.34            | 1028.65            | 0.329                          | 1273.09            | 419.27             |
| A_68_P20877313 | chr1:182627309-182627353                          | NM_013729:-165          | Mix11         | PROMOTER               | 0.554                                                        | 0.623                          | 3579.75            | 2230.22            | 0.345                          | 2884.62            | 995.97             |
| A_68_P24004044 | chr5:114894084-114894128                          | NM_029956:-70           | Mmab          | DIVERGENT_PROMOTER     | 0.554                                                        | 0.504                          | 1070.43            | 539.18             | 0.279                          | 929.38             | 259.14             |
| A_68_P27041530 | chr10:30522669-30522713                           | NM_172495:223           | Ncoa7         | INSIDE                 | 0.554                                                        | 0.548                          | 1606.18            | 880.11             | 0.304                          | 1306.02            | 396.82             |
| A_68_P23176715 | chr4:104782702-104782746                          | NM_178143:-221          | Prkaa2        | PROMOTER               | 0.554                                                        | 0.429                          | 2125.66            | 912.00             | 0.238                          | 1625.92            | 386.73             |
| A_68_P31259825 | chr17:57198936-57198980                           | NM_025877:328           | Slc25a23      | INSIDE                 | 0.554                                                        | 0.488                          | 2654.48            | 1296.22            | 0.271                          | 2082.08            | 563.67             |
| A_68_P32168786 | chr19:50752601-50752645                           | NM_021377:480           | Sorcs1        | INSIDE                 | 0.554                                                        | 0.620                          | 1509.19            | 935.50             | 0.343                          | 1213.94            | 416.53             |
| A_68_P25661253 | chr8:12396004-12396049                            | NM_009233:508           | Sox1          | INSIDE                 | 0.554                                                        | 0.488                          | 1936.47            | 945.71             | 0.271                          | 1446.16            | 391.54             |
| A_68_P24136159 | chr5:140020492-140020536                          | NM_013702:663           | Unex          | INSIDE                 | 0.554                                                        | 0.493                          | 1501.07            | 740.30             | 0.273                          | 1128.42            | 308.57             |
| A_68_P25614206 | chr8:3493424-3493468                              | NM_080461:309           | Zfp358        | INSIDE                 | 0.554                                                        | 0.352                          | 2119.63            | 746.48             | 0.195                          | 1681.69            | 327.95             |
| A_68_P31497267 | chr18:11997722-11997766                           | NM_001146287:-38        | Cables1       | PROMOTER               | 0.553                                                        | 0.486                          | 1665.49            | 808.73             | 0.268                          | 1224.89            | 328.79             |
| A_68_P27913316 | chr11:72608989-72609033                           | NM_001024926:331        | Cyb5d2        | INSIDE                 | 0.553                                                        | 0.692                          | 1555.18            | 1076.84            | 0.383                          | 1307.64            | 500.27             |
| A_68_P30478221 | chr15:98927716-98927760                           | NM_176835:-2176         | Dnajc22       | DIVERGENT_PROMOTER     | 0.553                                                        | 0.383                          | 1523.30            | 583.61             | 0.212                          | 1164.54            | 246.89             |
| A_68_P23155326 | chr4:101169630-101169674                          | NM_198412:400           | Dnajc6        | INSIDE                 | 0.553                                                        | 0.660                          | 2483.52            | 1639.61            | 0.365                          | 2019.88            | 737.18             |
| A_68_P21010978 | chr2:12340776-12340820                            | NM_024185:289           | Fam188a       | INSIDE                 | 0.553                                                        | 0.697                          | 1174.00            | 817.77             | 0.385                          | 958.38             | 369.45             |
| A_68_P27284104 | chr10:80040680-80040724                           | NM_078477:-661          | Klfl16        | PROMOTER               | 0.553                                                        | 0.607                          | 2026.42            | 1230.08            | 0.336                          | 1567.43            | 526.54             |
| A_68_P23445965 | chr5:3596035-3596079                              | NM_027777:-9            | Pex1          | PROMOTER               | 0.553                                                        | 0.527                          | 1240.26            | 653.58             | 0.291                          | 1005.49            | 292.76             |
| A_68_P24119438 | chr5:136578137-136578181                          | NM_133914:18373         | Rasa4         | INSIDE                 | 0.553                                                        | 0.659                          | 1416.44            | 932.98             | 0.364                          | 1122.29            | 409.03             |
| A_68_P28261128 | chr12:15821694-15821738                           | NM_144551:1875          | Trib2         | INSIDE                 | 0.553                                                        | 0.685                          | 3081.72            | 2110.61            | 0.379                          | 2537.93            | 960.76             |
| A_68_P22630562 | chr3:148651256-148651304                          | ENSMUST00000098518:1000 |               | INSIDE                 | 0.553                                                        | 0.455                          | 1153.17            | 525.19             | 0.252                          | 894.15             | 225.40             |
| A_68_P31891632 | chr18:85121550-85121594                           | NM_025969:-656          | 1700034H14Rik | PROMOTER               | 0.552                                                        | 0.478                          | 2856.82            | 1365.88            | 0.264                          | 2229.58            | 588.18             |
| A_68_P31112025 | chr17:26853064-26853108                           | NM_029870:492           | A930001N09Rik | INSIDE                 | 0.552                                                        | 0.575                          | 2484.45            | 1428.84            | 0.317                          | 2103.29            | 667.25             |
| A_68_P32213516 | chr19:58529694-58529738                           | NM_010279:-760          | Gfra1         | PROMOTER               | 0.552                                                        | 0.699                          | 3599.35            | 2514.57            | 0.386                          | 2391.78            | 922.06             |
| A_68_P24431596 | chr6:49163809-49163853                            | NM_023670:1123          | Igf2bp3       | INSIDE                 | 0.552                                                        | 0.528                          | 1902.95            | 1004.54            | 0.291                          | 1562.22            | 455.06             |
| A_68_P23120295 | chr4:94645754-94645798                            | NM_177239:15            | Mysm1         | INSIDE                 | 0.552                                                        | 0.623                          | 1198.81            | 746.32             | 0.344                          | 1053.70            | 362.31             |
| A_68_P30368650 | chr15:79634238-79634282                           | NM_030689:879           | Nptxr         | INSIDE                 | 0.552                                                        | 0.707                          | 1287.74            | 910.09             | 0.390                          | 1115.47            | 435.02             |
| A_68_P30346012 | chr15:75920669-75920713                           | NM_144847:-247          | Nrbp2         | PROMOTER               | 0.552                                                        | 0.670                          | 1346.58            | 901.54             | 0.369                          | 932.08             | 344.37             |
| A_68_P27551119 | chr11:3189697-3189741                             | NM_019574:-741          | Patz1         | PROMOTER               | 0.552                                                        | 0.697                          | 1944.77            | 1355.02            | 0.385                          | 1623.76            | 625.05             |
| A_68_P20633689 | chr1:136391258-136391302                          | NM_145510:44            | Rabif         | INSIDE                 | 0.552                                                        | 0.449                          | 1167.36            | 523.97             | 0.248                          | 924.39             | 229.20             |
| A_68_P27798062 | chr11:52045287-52045331                           | NM_011543:-188          | Skp1a         | PROMOTER               | 0.552                                                        | 0.536                          | 1812.67            | 971.02             | 0.296                          | 1514.98            | 448.31             |
| A_68_P22446821 | chr3:115710285-115710329                          | NM_023214:18            | Slc30a7       | INSIDE                 | 0.552                                                        | 0.621                          | 1370.18            | 850.22             | 0.342                          | 1049.51            | 359.32             |
| A_68_P20411726 | chr1:88255561-88255605                            | NR_002851:-2680         | Snord81       | PROMOTER               | 0.552                                                        | 0.724                          | 2936.10            | 2125.00            | 0.400                          | 2155.77            | 861.95             |
| A_68_P29733545 | chr14:76814748-76814792                           | NM_207652:-857          | Tsc22d1       | PROMOTER               | 0.552                                                        | 0.670                          | 1552.87            | 1040.69            | 0.370                          | 1208.06            | 446.93             |
| A_68_P24155561 | chr5:143997211-143997255                          | NM_177681:346           | Zfp12         | INSIDE                 | 0.552                                                        | 0.717                          | 2810.31            | 2014.94            | 0.396                          | 2164.43            | 857.11             |
| A_68_P26660364 | chr9:78463666-78463710                            | NM_153098:336           | Cd109         | INSIDE                 | 0.551                                                        | 0.484                          | 2473.96            | 1196.74            | 0.267                          | 2093.29            | 558.35             |
| A_68_P31118681 | chr17:27956946-27956990                           | NM_001033279:519        | D17Wsu92c     | INSIDE                 | 0.551                                                        | 0.485                          | 2873.68            | 1393.55            | 0.267                          | 2432.03            | 649.68             |
| A_68_P24593936 | chr6:83456719-83456763                            | NM_001162521:223        | Dguok         | INSIDE                 | 0.551                                                        | 0.637                          | 858.23             | 546.91             | 0.351                          | 760.83             | 267.37             |
| A_68_P31418994 | chr17:87154526-87154570                           | NM_010137:1345          | Epas1         | INSIDE                 | 0.551                                                        | 0.645                          | 1176.05            | 758.34             | 0.356                          | 976.78             | 347.35             |
| A_68_P28221299 | chr12:8305679-8305723                             | NM_013527:3060          | Gd17          | INSIDE                 | 0.551                                                        | 0.562                          | 1176.39            | 661.38             | 0.310                          | 942.05             | 291.95             |
| A_68_P25048708 | chr7:36103274-36103318                            | NM_026181:163           | Gpatch1       | INSIDE                 | 0.551                                                        | 0.600                          | 2849.90            | 1709.53            | 0.331                          | 2327.19            | 769.70             |
| A_68_P31425154 | chr17:88197235-88197279                           | NM_199251:78            | Kenk12        | INSIDE                 | 0.551                                                        | 0.642                          | 1855.73            | 1190.91            | 0.354                          | 1480.17            | 523.58             |
| A_68_P31095211 | chr17:24210441-24210485                           | NM_027008:-10           | Kctd5         | PROMOTER               | 0.551                                                        | 0.582                          | 2467.49            | 1437.18            | 0.321                          | 1824.41            | 585.38             |
| A_68_P21747681 | chr2:151931454-151931498                          | NM_029688:11            | Srxn1         | INSIDE                 | 0.551                                                        | 0.690                          | 2167.54            | 1495.96            | 0.380                          | 1752.81            | 666.04             |
| A_68_P23309106 | chr4:131476303-131476347                          | NM_001201367:-1361      | Tmem200b      | PROMOTER               | 0.551                                                        | 0.672                          | 1491.79            | 1002.37            | 0.370                          | 1377.04            | 509.77             |



| ProbeName      | Target position of probe on CpG island microarray | TargetID           | GeneSymbol    | CpG island Description | Ratio of relative methylation (TiO <sub>2</sub> -NP/Vehicle) | Sham group                     |                    |                    | TiO <sub>2</sub> -H group      |                    |                    |
|----------------|---------------------------------------------------|--------------------|---------------|------------------------|--------------------------------------------------------------|--------------------------------|--------------------|--------------------|--------------------------------|--------------------|--------------------|
|                |                                                   |                    |               |                        |                                                              | Relative methylation (Cy5/Cy3) | Cy3 signal (Input) | Cy5 signal (MeDIP) | Relative methylation (Cy5/Cy3) | Cy3 signal (Input) | Cy5 signal (MeDIP) |
| A_68_P30596854 | chr16:22265994-22266038                           | NM_009186:-14      | Tra2b         | PROMOTER               | 0.551                                                        | 0.416                          | 2931.55            | 1220.49            | 0.230                          | 2189.19            | 502.54             |
| A_68_P27635753 | chr11:21139469-21139513                           | NM_139061:599      | Vps54         | INSIDE                 | 0.551                                                        | 0.630                          | 1069.12            | 673.57             | 0.347                          | 883.52             | 306.69             |
| A_68_P32134051 | chr19:44808722-44808771                           |                    |               | Unknown                | 0.551                                                        | 2.986                          | 1372.34            | 4098.20            | 1.645                          | 901.26             | 1482.86            |
| A_68_P27910205 | chr11:72028532-72028576                           | NM_001163728:-85   | 4930563E22Rik | PROMOTER               | 0.550                                                        | 0.471                          | 1501.69            | 707.05             | 0.259                          | 1237.94            | 320.34             |
| A_68_P30811312 | chr16:62846773-62846817                           | NM_026577:72       | Arl13b        | INSIDE                 | 0.550                                                        | 0.665                          | 2678.06            | 1782.18            | 0.366                          | 2119.09            | 775.27             |
| A_68_P21703962 | chr2:143688269-143688313                          | NM_009751:619      | Bfsp1         | INSIDE                 | 0.550                                                        | 0.546                          | 3013.50            | 1646.23            | 0.301                          | 2402.58            | 722.05             |
| A_68_P24058180 | chr5:124357134-124357178                          | NM_026603:-127     | Denr          | PROMOTER               | 0.550                                                        | 0.502                          | 3004.11            | 1508.81            | 0.276                          | 2477.22            | 684.61             |
| A_68_P29941731 | chr14:119324409-119324453                         | NM_025943:-2041    | Dzip1         | PROMOTER               | 0.550                                                        | 0.475                          | 1629.32            | 774.21             | 0.261                          | 1344.65            | 351.27             |
| A_68_P20612315 | chr1:132774907-132774951                          | NM_026976:12575    | Faim3         | INSIDE                 | 0.550                                                        | 0.439                          | 1576.37            | 691.78             | 0.241                          | 1307.67            | 315.70             |
| A_68_P28727214 | chr12:109544952-109544996                         | NM_001044380:495   | Hhipl1        | INSIDE                 | 0.550                                                        | 0.429                          | 1893.69            | 812.73             | 0.236                          | 1451.64            | 342.78             |
| A_68_P25613343 | chr8:3279377-3279421                              | NM_010568:219      | Insr          | INSIDE                 | 0.550                                                        | 0.481                          | 1718.27            | 825.72             | 0.264                          | 1383.28            | 365.34             |
| A_68_P25098817 | chr7:53652411-53652455                            | NM_00112739:566    | Kenc1         | INSIDE                 | 0.550                                                        | 0.504                          | 2277.86            | 1147.36            | 0.277                          | 1965.29            | 544.59             |
| A_68_P25016713 | chr7:28114386-28114430                            | NM_001113549:4259  | Ltbp4         | INSIDE                 | 0.550                                                        | 0.724                          | 1877.58            | 1359.86            | 0.398                          | 1365.19            | 543.97             |
| A_68_P30425255 | chr15:89284136-89284180                           | NM_021921:-183     | Mapk8ip2      | PROMOTER               | 0.550                                                        | 0.697                          | 4044.32            | 2817.95            | 0.383                          | 2992.20            | 1146.30            |
| A_68_P24592786 | chr6:83276392-83276436                            | NM_145571:382      | Mobk11b       | INSIDE                 | 0.550                                                        | 0.506                          | 1381.30            | 698.94             | 0.278                          | 1160.57            | 322.90             |
| A_68_P25090466 | chr7:52241494-52241538                            | NM_019830:186      | Prmt1         | INSIDE                 | 0.550                                                        | 0.582                          | 2394.80            | 1392.61            | 0.320                          | 1757.31            | 561.92             |
| A_68_P26630338 | chr9:72772983-72773027                            | NM_028116:-452     | Pygo1         | PROMOTER               | 0.550                                                        | 0.586                          | 2539.61            | 1488.02            | 0.322                          | 1916.71            | 617.62             |
| A_68_P31253475 | chr17:56176053-56176097                           | NM_013664:-75      | Sh3gl1        | DIVERGENT_PROMOTER     | 0.550                                                        | 0.553                          | 4830.53            | 2671.43            | 0.304                          | 3637.50            | 1106.08            |
| A_68_P25026345 | chr7:30066535-30066579                            | NM_001082548:440   | Spint2        | INSIDE                 | 0.550                                                        | 0.718                          | 1768.27            | 1268.84            | 0.395                          | 1463.88            | 577.69             |
| A_68_P24534825 | chr6:71094013-71094057                            | NM_001033929:336   | Thmsl2        | INSIDE                 | 0.550                                                        | 0.529                          | 2103.11            | 1112.05            | 0.291                          | 1601.07            | 465.56             |
| A_68_P22857437 | chr4:40420294-40420338                            | NM_001166009:154   | Tmem215       | INSIDE                 | 0.550                                                        | 0.522                          | 1267.86            | 662.26             | 0.287                          | 1098.66            | 315.69             |
| A_68_P27898020 | chr11:69749025-69749069                           | NM_016875:-354     | Ybx2          | PROMOTER               | 0.550                                                        | 0.566                          | 2117.23            | 1197.87            | 0.311                          | 1787.40            | 556.56             |
| A_68_P30959877 | chr16:90935364-90935408                           | NM_026502:-292     | 1110004E09Rik | PROMOTER               | 0.549                                                        | 0.655                          | 975.44             | 638.67             | 0.359                          | 806.84             | 289.87             |
| A_68_P21646220 | chr2:133378597-133378641                          | NM_007553:-316     | Bmp2          | PROMOTER               | 0.549                                                        | 0.608                          | 1727.31            | 1050.49            | 0.334                          | 1473.87            | 491.72             |
| A_68_P31933965 | chr19:6320530-6320574                             | NM_001033342:14096 | Cde42bpg      | INSIDE                 | 0.549                                                        | 3.625                          | 1485.09            | 5383.15            | 1.989                          | 1314.89            | 2615.11            |
| A_68_P20522333 | chr1:111879695-111879739                          | NM_172853:-597     | Cdh7          | PROMOTER               | 0.549                                                        | 0.625                          | 2362.99            | 1475.73            | 0.343                          | 1769.93            | 606.97             |
| A_68_P28705225 | chr12:105989571-105989615                         | NM_148948:570      | Dicer1        | INSIDE                 | 0.549                                                        | 0.404                          | 1714.93            | 693.62             | 0.222                          | 1382.82            | 307.15             |
| A_68_P26406144 | chr9:32348552-32348596                            | NM_008026:379      | Fil1          | INSIDE                 | 0.549                                                        | 0.569                          | 917.17             | 522.06             | 0.312                          | 752.94             | 235.12             |
| A_68_P27282040 | chr10:79723724-79723768                           | NM_010255:-33      | Gamt          | DIVERGENT_PROMOTER     | 0.549                                                        | 0.456                          | 3792.04            | 1728.04            | 0.250                          | 2988.07            | 747.36             |
| A_68_P23091882 | chr4:88368088-88368132                            | NM_172871:302      | Klh9          | INSIDE                 | 0.549                                                        | 0.575                          | 1844.70            | 1060.45            | 0.316                          | 1498.88            | 472.96             |
| A_68_P26500006 | chr9:49605230-49605274                            | NM_001081445:1922  | Neam1         | INSIDE                 | 0.549                                                        | 0.306                          | 2266.14            | 694.34             | 0.168                          | 1697.68            | 285.48             |
| A_68_P21565424 | chr2:118503074-118503118                          | NM_001145854:115   | Pak6          | INSIDE                 | 0.549                                                        | 0.425                          | 1545.02            | 657.06             | 0.233                          | 1355.55            | 316.31             |
| A_68_P26809843 | chr9:107501498-107501542                          | NM_009153:6213     | Sema3b        | INSIDE                 | 0.549                                                        | 3.968                          | 607.40             | 2409.97            | 2.178                          | 440.27             | 958.74             |
| A_68_P31019372 | chr17:5840861-5840905                             | NM_025664:-497     | Snx9          | PROMOTER               | 0.549                                                        | 0.626                          | 1071.86            | 671.50             | 0.344                          | 818.74             | 281.71             |
| A_68_P20638618 | chr1:137210111-137210155                          | NM_011590:182      | Timm17a       | INSIDE                 | 0.549                                                        | 0.528                          | 2434.31            | 1285.29            | 0.290                          | 1764.74            | 511.79             |
| A_68_P21736744 | chr2:149656175-149656219                          | NM_001085521:-322  | Tmem90b       | PROMOTER               | 0.549                                                        | 0.414                          | 1518.06            | 628.69             | 0.227                          | 1125.00            | 255.93             |
| A_68_P24427172 | chr6:48389196-48389240                            | NM_001085415:5871  | Zfp467        | INSIDE                 | 0.549                                                        | 1.351                          | 4264.31            | 5759.59            | 0.741                          | 2680.08            | 1985.71            |
| A_68_P28740680 | chr12:112088415-112088460                         | NM_001199785:-51   | Zfp839        | DIVERGENT_PROMOTER     | 0.549                                                        | 0.750                          | 4590.79            | 3442.32            | 0.412                          | 3358.40            | 1383.67            |
| A_68_P23023123 | chr4:74923898-74923942                            | NM_025849:270      | 3110001D03Rik | INSIDE                 | 0.548                                                        | 0.648                          | 1123.40            | 728.35             | 0.355                          | 848.05             | 301.35             |
| A_68_P26888898 | chr9:122261191-122261235                          | NM_026179:479      | Ahd5          | INSIDE                 | 0.548                                                        | 0.475                          | 1220.49            | 580.11             | 0.260                          | 1149.07            | 299.21             |
| A_68_P26531723 | chr9:55359728-55359772                            | NM_145615:300      | Etfa          | INSIDE                 | 0.548                                                        | 0.568                          | 1555.05            | 882.77             | 0.311                          | 1334.06            | 414.85             |
| A_68_P28429306 | chr12:52449562-52449606                           | NM_001015099:368   | G2c3          | INSIDE                 | 0.548                                                        | 0.644                          | 1112.50            | 716.32             | 0.353                          | 1006.48            | 355.44             |
| A_68_P21129593 | chr2:34609363-34609407                            | NM_025709:1368     | Gapvd1        | INSIDE                 | 0.548                                                        | 0.546                          | 3536.90            | 1930.95            | 0.299                          | 2825.39            | 844.86             |
| A_68_P21147671 | chr2:38210043-38210094                            | NM_010710:3241     | Lhx2          | INSIDE                 | 0.548                                                        | 0.563                          | 946.02             | 532.52             | 0.308                          | 580.27             | 178.99             |
| A_68_P24981706 | chr7:17061083-17061127                            | NM_008718:1025     | Npas1         | INSIDE                 | 0.548                                                        | 0.582                          | 1004.12            | 584.56             | 0.319                          | 874.17             | 279.13             |
| A_68_P31306704 | chr17:66868707-66868751                           | NM_024448:282      | Rab12         | INSIDE                 | 0.548                                                        | 0.368                          | 2046.32            | 752.61             | 0.201                          | 1460.20            | 294.13             |
| A_68_P24992460 | chr7:19868360-19868404                            | NM_001025364:-8065 | Rtn2          | PROMOTER               | 0.548                                                        | 0.493                          | 1960.99            | 966.53             | 0.270                          | 1462.25            | 394.66             |
| A_68_P31151613 | chr17:34168502-34168546                           | NM_001077709:111   | Slc39a7       | INSIDE                 | 0.548                                                        | 0.588                          | 1203.11            | 706.85             | 0.322                          | 898.48             | 289.29             |
| A_68_P28635988 | chr12:92885896-92885940                           | NM_175367:138958   | Ston2         | INSIDE                 | 0.548                                                        | 2.984                          | 964.38             | 2877.66            | 1.635                          | 863.57             | 1412.37            |
| A_68_P30251030 | chr15:58765208-58765252                           | NM_175151:55       | Tatdn1        | INSIDE                 | 0.548                                                        | 0.598                          | 1946.93            | 1163.77            | 0.327                          | 1508.81            | 493.79             |
| A_68_P23749880 | chr5:64621862-64621906                            | NM_019636:70435    | Tbc1d1        | INSIDE                 | 0.548                                                        | 0.474                          | 1482.14            | 702.26             | 0.260                          | 1194.78            | 310.27             |

| ProbeName      | Target position of probe on CpG island microarray | TargetID                 | GeneSymbol    | CpG island Description | Ratio of relative methylation (TiO <sub>2</sub> -NP/Vehicle) | Sham group                     |                    |                    | TiO <sub>2</sub> -H group      |                    |                    |
|----------------|---------------------------------------------------|--------------------------|---------------|------------------------|--------------------------------------------------------------|--------------------------------|--------------------|--------------------|--------------------------------|--------------------|--------------------|
|                |                                                   |                          |               |                        |                                                              | Relative methylation (Cy5/Cy3) | Cy3 signal (Input) | Cy5 signal (MeDIP) | Relative methylation (Cy5/Cy3) | Cy3 signal (Input) | Cy5 signal (MeDIP) |
| A_68_P30385311 | chr15:82730377-82730421                           | NR_027799:-1507          | Tbrg3         | PROMOTER               | 0.548                                                        | 0.707                          | 1452.20            | 1026.17            | 0.388                          | 1282.99            | 497.26             |
| A_68_P27902563 | chr11:70578032-70578076                           | NM_177565:106            | Zfp3          | INSIDE                 | 0.548                                                        | 0.405                          | 1453.52            | 587.98             | 0.222                          | 1276.75            | 282.92             |
| A_68_P31292451 | chr17:64212897-64212941                           | ENSMUST00000050753:222   |               | INSIDE                 | 0.548                                                        | 0.616                          | 2031.27            | 1252.16            | 0.338                          | 1684.70            | 568.61             |
| A_68_P27085192 | chr10:40403058-40403102                           | NM_177793:-7             | 9030224M15Rik | PROMOTER               | 0.547                                                        | 0.682                          | 1325.94            | 904.47             | 0.373                          | 1157.92            | 431.89             |
| A_68_P28751330 | chr12:113858462-113858506                         | NM_007421:227            | Adssl1        | INSIDE                 | 0.547                                                        | 0.643                          | 4984.36            | 3205.37            | 0.352                          | 3561.95            | 1253.03            |
| A_68_P30149944 | chr15:38448175-38448219                           | NM_001102458:825         | Azin1         | INSIDE                 | 0.547                                                        | 0.721                          | 6662.80            | 4806.06            | 0.394                          | 5041.57            | 1987.79            |
| A_68_P29292644 | chr13:105607137-105607182                         | NM_026072:-126           | Cwc27         | DIVERGENT_PROMOTER     | 0.547                                                        | 0.609                          | 1368.52            | 833.90             | 0.333                          | 1139.10            | 379.52             |
| A_68_P20413588 | chr1:88600253-88600297                            | NM_001172157:-104        | Dis3l2        | PROMOTER               | 0.547                                                        | 0.626                          | 3588.05            | 2247.88            | 0.343                          | 2757.39            | 945.60             |
| A_68_P29026629 | chr13:49777484-49777528                           | NM_172015:8              | Iars          | INSIDE                 | 0.547                                                        | 0.646                          | 1137.31            | 735.03             | 0.354                          | 945.69             | 334.59             |
| A_68_P24089926 | chr5:130090512-130090556                          | NM_011846:446            | Mmp17         | INSIDE                 | 0.547                                                        | 0.421                          | 1943.77            | 818.03             | 0.230                          | 1667.85            | 383.78             |
| A_68_P20352130 | chr1:75121478-75121522                            | NM_029342:300            | Nhej1         | INSIDE                 | 0.547                                                        | 0.505                          | 1453.54            | 733.90             | 0.276                          | 1120.07            | 309.27             |
| A_68_P25410004 | chr7:116925392-116925436                          | NM_020610:-355           | Nrip3         | PROMOTER               | 0.547                                                        | 0.676                          | 1933.21            | 1307.24            | 0.370                          | 1507.09            | 557.46             |
| A_68_P30587017 | chr16:20302514-20302558                           | NM_001005767:-101        | Par1          | PROMOTER               | 0.547                                                        | 0.730                          | 2179.68            | 1592.07            | 0.400                          | 1745.38            | 697.47             |
| A_68_P28112590 | chr11:108204958-108205002                         | NM_011101:222            | Prkca         | INSIDE                 | 0.547                                                        | 0.716                          | 1635.90            | 1170.74            | 0.391                          | 1247.44            | 488.36             |
| A_68_P28164528 | chr11:117193656-117193700                         | NM_001113488:52          | Septin9       | INSIDE                 | 0.547                                                        | 0.472                          | 1732.47            | 818.41             | 0.258                          | 1274.35            | 329.23             |
| A_68_P31969894 | chr19:14672643-14672687                           | NM_011600:-191           | Tle4          | PROMOTER               | 0.547                                                        | 0.448                          | 1528.45            | 684.76             | 0.245                          | 1323.42            | 324.57             |
| A_68_P27513159 | chr10:122634312-122634356                         | NM_027604:-355           | Usp15         | PROMOTER               | 0.547                                                        | 0.569                          | 1198.25            | 681.30             | 0.311                          | 905.95             | 281.84             |
| A_68_P24958144 | chr7:7073964-7074008                              | NM_172738:201            | Zfp954        | INSIDE                 | 0.547                                                        | 0.594                          | 2113.52            | 1255.26            | 0.325                          | 1698.24            | 551.27             |
| A_68_P28041229 | chr11:95720981-95721025                           | NM_008081:55183          | B4galnt2      | DOWNSTREAM             | 0.546                                                        | 0.659                          | 908.26             | 598.24             | 0.360                          | 803.74             | 289.50             |
| A_68_P26199702 | chr8:119445672-119445716                          | NM_028131:55             | Cenpn         | INSIDE                 | 0.546                                                        | 0.614                          | 949.24             | 582.54             | 0.335                          | 819.18             | 274.50             |
| A_68_P25835333 | chr8:47377718-47377762                            | NM_173789:2285           | Helt          | INSIDE                 | 0.546                                                        | 0.709                          | 1376.17            | 975.11             | 0.387                          | 1184.63            | 458.14             |
| A_68_P28581705 | chr12:82696134-82696178                           | NM_027213:-211           | Med6          | PROMOTER               | 0.546                                                        | 3.552                          | 7665.01            | 27224.48           | 1.939                          | 4821.74            | 9348.28            |
| A_68_P21076059 | chr2:25915973-25916017                            | NM_001037098:31922       | Nacc2         | INSIDE                 | 0.546                                                        | 3.135                          | 557.06             | 1746.57            | 1.712                          | 472.85             | 809.35             |
| A_68_P25021470 | chr7:29157527-29157571                            | NM_001083912:133         | Plekhg2       | INSIDE                 | 0.546                                                        | 0.452                          | 1942.28            | 876.99             | 0.246                          | 1514.20            | 373.18             |
| A_68_P21101101 | chr2:29918413-29918457                            | NM_001204875:-3559       | Set           | PROMOTER               | 0.546                                                        | 0.653                          | 878.99             | 574.01             | 0.357                          | 637.51             | 227.30             |
| A_68_P28351013 | chr12:35731615-35731659                           | NM_001014973:-224        | Snx13         | PROMOTER               | 0.546                                                        | 0.624                          | 967.64             | 604.04             | 0.341                          | 954.36             | 325.42             |
| A_68_P24056370 | chr5:124023089-124023133                          | NM_029929:-86            | Vps33a        | PROMOTER               | 0.546                                                        | 0.646                          | 1251.04            | 808.41             | 0.353                          | 1059.59            | 373.89             |
| A_68_P22341850 | chr3:94818782-94818826                            | NM_030074:356            | Zfp687        | INSIDE                 | 0.546                                                        | 0.581                          | 1044.57            | 606.94             | 0.317                          | 792.04             | 251.19             |
| A_68_P23611143 | chr5:37420486-37420530                            | ENSMUST00000165557:12377 |               | DOWNSTREAM             | 0.546                                                        | 0.522                          | 1411.75            | 736.26             | 0.285                          | 1149.64            | 327.25             |
| A_68_P28680559 | chr12:101437798-101437842                         | NM_009790:70             | Calm1         | INSIDE                 | 0.545                                                        | 0.438                          | 1423.84            | 623.99             | 0.239                          | 1086.39            | 259.37             |
| A_68_P29038492 | chr13:52625955-52625999                           | NM_001024474:229         | Diras2        | INSIDE                 | 0.545                                                        | 0.682                          | 4342.23            | 2960.54            | 0.372                          | 3238.56            | 1203.85            |
| A_68_P28396957 | chr12:45310575-45310620                           | NM_013760:458            | Dnajb9        | INSIDE                 | 0.545                                                        | 0.405                          | 1667.74            | 675.83             | 0.221                          | 1374.69            | 303.33             |
| A_68_P25507036 | chr7:134890617-134890661                          | NM_172748:350            | Fbx119        | INSIDE                 | 0.545                                                        | 0.577                          | 3130.41            | 1805.33            | 0.314                          | 2168.27            | 681.06             |
| A_68_P24830597 | chr6:127030465-127030509                          | NM_022657:7567           | Fgf23         | INSIDE                 | 0.545                                                        | 0.659                          | 3245.69            | 2139.62            | 0.359                          | 2522.13            | 906.67             |
| A_68_P25668519 | chr8:13468177-13468227                            | NM_019521:26333          | Gas6          | INSIDE                 | 0.545                                                        | 2.755                          | 986.63             | 2718.03            | 1.502                          | 664.35             | 997.76             |
| A_68_P23284717 | chr4:127003796-127003840                          | NM_008126:2551           | Gjb3          | INSIDE                 | 0.545                                                        | 4.401                          | 2507.42            | 11034.19           | 2.398                          | 1882.09            | 4513.55            |
| A_68_P21438061 | chr2:93796206-93796250                            | NM_001145034:1029        | Gm13889       | INSIDE                 | 0.545                                                        | 0.646                          | 3243.11            | 2093.86            | 0.352                          | 2326.97            | 818.79             |
| A_68_P30344599 | chr15:75692883-75692927                           | NM_026960:136            | Gsdmd         | INSIDE                 | 0.545                                                        | 0.654                          | 1225.36            | 800.98             | 0.356                          | 892.64             | 317.78             |
| A_68_P20725330 | chr1:155033404-155033448                          | NM_008485:151            | Lame2         | INSIDE                 | 0.545                                                        | 0.571                          | 1269.63            | 725.03             | 0.311                          | 1053.56            | 327.89             |
| A_68_P27271615 | chr10:77472561-77472605                           | NM_008826:-41            | Pfkl          | PROMOTER               | 0.545                                                        | 0.580                          | 1289.63            | 748.22             | 0.316                          | 1077.71            | 340.70             |
| A_68_P26825597 | chr9:110646599-110646643                          | NM_001083935:-430        | Pth1r         | PROMOTER               | 0.545                                                        | 0.686                          | 2045.01            | 1402.42            | 0.374                          | 1634.41            | 611.20             |
| A_68_P26467468 | chr9:44215837-44215881                            | NM_024266:62             | Rps25         | INSIDE                 | 0.545                                                        | 0.472                          | 3137.36            | 1480.95            | 0.257                          | 2248.34            | 578.92             |
| A_68_P22149789 | chr3:54589967-54590012                            | NM_019483:30486          | Smad9         | INSIDE                 | 0.545                                                        | 2.793                          | 751.23             | 2098.47            | 1.523                          | 693.79             | 1056.72            |
| A_68_P26453528 | chr9:41931891-41931935                            | NM_011436:460            | Sorl1         | INSIDE                 | 0.545                                                        | 0.463                          | 1655.88            | 766.03             | 0.252                          | 1376.90            | 347.07             |
| A_68_P20261291 | chr1:59030219-59030263                            | NM_172406:86             | Trak2         | INSIDE                 | 0.545                                                        | 0.467                          | 2678.36            | 1252.08            | 0.255                          | 2055.05            | 523.99             |
| A_68_P23293641 | chr4:128561860-128561904                          | NM_178110:499            | Trim62        | INSIDE                 | 0.545                                                        | 0.667                          | 2352.63            | 1569.34            | 0.364                          | 1936.20            | 703.94             |
| A_68_P22955051 | chr4:59202692-59202736                            | NM_011673:293            | Ugeg          | INSIDE                 | 0.545                                                        | 0.563                          | 1620.86            | 912.76             | 0.307                          | 1262.37            | 387.28             |
| A_68_P26494154 | chr9:48644306-48644350                            | NM_001033324:-278        | Zbtb16        | PROMOTER               | 0.545                                                        | 0.533                          | 1469.34            | 782.75             | 0.291                          | 1137.61            | 330.51             |
| A_68_P23694950 | chr5:52862343-52862387                            |                          |               | Unknown                | 0.545                                                        | 0.575                          | 1162.21            | 668.40             | 0.314                          | 889.66             | 279.09             |
| A_68_P21061191 | chr2:22895186-22895230                            | NM_001077190:552         | Abi1          | INSIDE                 | 0.544                                                        | 0.528                          | 1339.40            | 707.62             | 0.287                          | 1188.33            | 341.57             |
| A_68_P26128839 | chr8:107033201-107033245                          | NM_180958:565            | Ccdc79        | INSIDE                 | 0.544                                                        | 0.619                          | 1433.66            | 887.98             | 0.337                          | 1088.20            | 366.73             |

| ProbeName      | Target position of probe on CpG island microarray | TargetID                | GeneSymbol    | CpG island Description | Ratio of relative methylation (TiO <sub>2</sub> -NP/Vehicle) | Sham group                     |                    |                    | TiO <sub>2</sub> -H group      |                    |                    |
|----------------|---------------------------------------------------|-------------------------|---------------|------------------------|--------------------------------------------------------------|--------------------------------|--------------------|--------------------|--------------------------------|--------------------|--------------------|
|                |                                                   |                         |               |                        |                                                              | Relative methylation (Cy5/Cy3) | Cy3 signal (Input) | Cy5 signal (MeDIP) | Relative methylation (Cy5/Cy3) | Cy3 signal (Input) | Cy5 signal (MeDIP) |
| A_68_P21425958 | chr2:91848432-91848476                            | NM_011957:15873         | Creb3l1       | INSIDE                 | 0.544                                                        | 0.461                          | 1531.75            | 705.60             | 0.251                          | 1151.80            | 288.78             |
| A_68_P27487944 | chr10:118305191-118305235                         | NM_001014390:747        | Dyrk2         | INSIDE                 | 0.544                                                        | 0.645                          | 1276.23            | 823.73             | 0.351                          | 1093.33            | 383.90             |
| A_68_P24193751 | chr5:151755711-151755755                          | NM_013823:551           | Kl            | INSIDE                 | 0.544                                                        | 0.537                          | 1002.19            | 538.11             | 0.292                          | 947.84             | 276.69             |
| A_68_P20624276 | chr1:134777196-134777240                          | NM_010732:287           | Lrrn2         | INSIDE                 | 0.544                                                        | 0.629                          | 1327.89            | 835.28             | 0.342                          | 1101.54            | 376.70             |
| A_68_P22882728 | chr4:45421725-45421769                            | NM_001009949:-108       | Mcart1        | PROMOTER               | 0.544                                                        | 0.460                          | 1645.80            | 756.44             | 0.250                          | 1276.62            | 319.43             |
| A_68_P24089919 | chr5:130089703-130089747                          | NM_011846:-364          | Mmp17         | PROMOTER               | 0.544                                                        | 0.649                          | 3126.10            | 2027.88            | 0.353                          | 2301.27            | 812.81             |
| A_68_P22606646 | chr3:144781460-144781506                          | NM_001162538:-70        | Odf2l         | PROMOTER               | 0.544                                                        | 0.598                          | 2282.71            | 1365.36            | 0.325                          | 1816.47            | 590.70             |
| A_68_P31381751 | chr17:80606502-80606546                           | NM_001195485:121        | Srsf7         | INSIDE                 | 0.544                                                        | 0.617                          | 1660.75            | 1024.34            | 0.335                          | 1280.02            | 429.18             |
| A_68_P31156002 | chr17:34973346-34973390                           | NM_019442:480           | Stk19         | INSIDE                 | 0.544                                                        | 0.616                          | 1454.28            | 895.82             | 0.335                          | 1323.89            | 444.02             |
| A_68_P27365510 | chr10:94977758-94977802                           | NM_080560:-15           | Ube2n         | PROMOTER               | 0.544                                                        | 0.448                          | 1157.40            | 518.61             | 0.244                          | 935.78             | 228.11             |
| A_68_P26467843 | chr9:44291481-44291525                            | ENSMUST00000136322:4642 |               | DOWNSTREAM             | 0.544                                                        | 0.674                          | 1666.30            | 1123.51            | 0.367                          | 1189.81            | 436.68             |
| A_68_P24010683 | chr5:116081567-116081611                          | NR_027810:237           | 1110006O24Rik | INSIDE                 | 0.543                                                        | 0.480                          | 3967.39            | 1902.82            | 0.261                          | 3024.88            | 788.20             |
| A_68_P23332632 | chr4:135762182-135762226                          | NM_001008232:-75        | Asap3         | PROMOTER               | 0.543                                                        | 2.821                          | 18055.88           | 50943.65           | 1.533                          | 12634.63           | 19363.60           |
| A_68_P30371083 | chr15:80085473-80085517                           | NM_009716:-119          | Atf4          | PROMOTER               | 0.543                                                        | 0.632                          | 913.43             | 577.46             | 0.343                          | 744.56             | 255.46             |
| A_68_P31929038 | chr19:5491024-5491068                             | NM_007687:592           | Cfl1          | INSIDE                 | 0.543                                                        | 0.647                          | 1064.32            | 688.27             | 0.351                          | 871.14             | 306.02             |
| A_68_P22317612 | chr3:88972806-88972850                            | NM_001163432:4102       | Clk2          | INSIDE                 | 0.543                                                        | 1.357                          | 5688.68            | 7717.31            | 0.736                          | 4168.93            | 3069.01            |
| A_68_P32145760 | chr19:46836584-46836628                           | NM_001102471:508        | Cnrm2         | INSIDE                 | 0.543                                                        | 0.449                          | 2306.30            | 1035.74            | 0.244                          | 1821.43            | 444.46             |
| A_68_P25951443 | chr8:72899164-72899208                            | NM_016685:1740          | Comp          | INSIDE                 | 0.543                                                        | 0.397                          | 1681.33            | 668.26             | 0.216                          | 1209.96            | 261.28             |
| A_68_P26079750 | chr8:97362477-97362521                            | NM_026452:182           | Coq9          | INSIDE                 | 0.543                                                        | 0.377                          | 3531.86            | 1332.20            | 0.205                          | 2767.06            | 566.52             |
| A_68_P30511523 | chr16:4679735-4679779                             | NM_030205:-36           | Coro7         | DIVERGENT_PROMOTER     | 0.543                                                        | 0.679                          | 1880.36            | 1276.46            | 0.369                          | 1458.73            | 537.79             |
| A_68_P29410629 | chr14:13173646-13173690                           | NM_080433:4711          | Fezf2         | DOWNSTREAM             | 0.543                                                        | 0.462                          | 1147.86            | 529.98             | 0.250                          | 1052.13            | 263.56             |
| A_68_P30683214 | chr16:37916363-37916407                           | NM_153394:-197          | Gpr156        | PROMOTER               | 0.543                                                        | 0.654                          | 962.33             | 629.66             | 0.355                          | 758.05             | 269.48             |
| A_68_P26017803 | chr8:86566236-86566280                            | NM_016671:216           | Il27ra        | INSIDE                 | 0.543                                                        | 0.727                          | 3520.60            | 2560.29            | 0.395                          | 2614.92            | 1033.06            |
| A_68_P20644038 | chr1:138028419-138028463                          | NM_001039472:463        | Kif21b        | INSIDE                 | 0.543                                                        | 0.566                          | 1200.58            | 679.11             | 0.307                          | 1107.51            | 340.33             |
| A_68_P32148154 | chr19:47254136-47254180                           | NM_021360:849           | Neurl1a       | INSIDE                 | 0.543                                                        | 6.887                          | 11150.18           | 76794.00           | 3.742                          | 7444.01            | 27859.02           |
| A_68_P29057299 | chr13:55932917-55932961                           | NM_011097:-152          | Pitx1         | PROMOTER               | 0.543                                                        | 0.491                          | 1163.44            | 570.69             | 0.266                          | 928.53             | 247.14             |
| A_68_P23656662 | chr5:45841524-45841568                            | NM_024236:-78           | Qdpr          | DIVERGENT_PROMOTER     | 0.543                                                        | 0.446                          | 1395.00            | 622.19             | 0.242                          | 1152.90            | 279.07             |
| A_68_P20557411 | chr1:121401081-121401125                          | NM_022327:257           | Ralb          | INSIDE                 | 0.543                                                        | 0.592                          | 3035.96            | 1797.70            | 0.322                          | 2369.74            | 762.06             |
| A_68_P31925255 | chr19:4811527-4811571                             | NM_019869:86            | Rbm14         | INSIDE                 | 0.543                                                        | 0.553                          | 1317.37            | 728.30             | 0.300                          | 1027.16            | 308.37             |
| A_68_P22165084 | chr3:57539624-57539668                            | NM_011883:-341          | Rnf13         | PROMOTER               | 0.543                                                        | 0.444                          | 1615.48            | 717.98             | 0.241                          | 1336.18            | 322.20             |
| A_68_P31930504 | chr19:5731477-5731521                             | NM_020491:223           | Sssea1        | INSIDE                 | 0.543                                                        | 0.578                          | 1028.03            | 593.89             | 0.314                          | 770.02             | 241.55             |
| A_68_P30792107 | chr16:58523074-58523118                           | NM_018784:329           | St3gal6       | INSIDE                 | 0.543                                                        | 0.578                          | 1177.04            | 680.78             | 0.314                          | 897.75             | 281.89             |
| A_68_P20066611 | chr1:19199816-19199872                            | NM_001025305:-2290      | Tcfap2b       | PROMOTER               | 0.543                                                        | 0.645                          | 1427.03            | 920.39             | 0.350                          | 1101.28            | 385.88             |
| A_68_P31121931 | chr17:28478403-28478447                           | NM_001204156:8867       | Tead3         | INSIDE                 | 0.543                                                        | 0.478                          | 1439.41            | 687.77             | 0.260                          | 1169.74            | 303.73             |
| A_68_P24136132 | chr5:140016559-140016603                          | NM_013702:-3271         | Unex          | PROMOTER               | 0.543                                                        | 0.700                          | 2479.04            | 1736.39            | 0.381                          | 1900.50            | 723.36             |
| A_68_P24638017 | chr6:91235626-91235670                            |                         |               | Unknown                | 0.543                                                        | 0.687                          | 1656.86            | 1137.58            | 0.373                          | 1269.65            | 473.01             |
| A_68_P25210209 | chr7:77426428-77426472                            | AK148659:-1805          |               | PROMOTER               | 0.543                                                        | 0.619                          | 1217.24            | 753.20             | 0.336                          | 966.29             | 324.78             |
| A_68_P25841618 | chr8:48499216-48499260                            | ENSMUST00000074466:756  |               | INSIDE                 | 0.543                                                        | 0.410                          | 1619.11            | 663.44             | 0.222                          | 1311.63            | 291.71             |
| A_68_P24464804 | chr6:54631784-54631828                            | NM_026629:41            | 2410066E13Rik | INSIDE                 | 0.542                                                        | 0.375                          | 1375.53            | 515.97             | 0.203                          | 1127.07            | 229.13             |
| A_68_P23417005 | chr4:151552435-151552479                          | NM_001146057:-7786      | Acot7         | PROMOTER               | 0.542                                                        | 0.278                          | 2371.44            | 659.43             | 0.151                          | 1876.67            | 282.61             |
| A_68_P28050942 | chr11:97361786-97361830                           | NM_021493:50335         | Arhgap23      | INSIDE                 | 0.542                                                        | 0.664                          | 2050.85            | 1360.95            | 0.359                          | 1674.22            | 601.87             |
| A_68_P30573854 | chr16:17452586-17452630                           | NM_007764:529           | Crkl          | INSIDE                 | 0.542                                                        | 0.685                          | 1684.53            | 1154.00            | 0.372                          | 1284.92            | 477.48             |
| A_68_P25502555 | chr7:133991327-133991371                          | NM_010069:282           | Doc2a         | INSIDE                 | 0.542                                                        | 0.526                          | 1156.49            | 608.46             | 0.285                          | 965.39             | 275.48             |
| A_68_P27677361 | chr11:29924802-29924846                           | NM_146016:1209          | Eml6          | INSIDE                 | 0.542                                                        | 0.668                          | 1041.82            | 695.84             | 0.362                          | 987.53             | 357.17             |
| A_68_P29309824 | chr13:108949176-108949220                         | NM_028042:267           | Ercc8         | INSIDE                 | 0.542                                                        | 0.546                          | 937.84             | 512.42             | 0.296                          | 779.43             | 230.99             |
| A_68_P23539565 | chr5:23536003-23536047                            | NM_053090:477           | Fam126a       | INSIDE                 | 0.542                                                        | 0.540                          | 2375.65            | 1283.56            | 0.293                          | 1969.12            | 576.23             |
| A_68_P25023289 | chr7:29517672-29517716                            | NM_015796:15886         | Fbxo17        | INSIDE                 | 0.542                                                        | 0.613                          | 1326.90            | 813.96             | 0.332                          | 1094.32            | 363.66             |
| A_68_P22299771 | chr3:85691284-85691328                            | NM_177130:134           | Gltx2d2       | INSIDE                 | 0.542                                                        | 0.544                          | 1148.12            | 624.12             | 0.295                          | 976.14             | 287.65             |
| A_68_P26445379 | chr9:40608906-40608950                            | NM_031165:-427          | Hspa8         | PROMOTER               | 0.542                                                        | 0.499                          | 1949.01            | 972.53             | 0.271                          | 1501.36            | 406.35             |
| A_68_P24322954 | chr6:28782175-28782219                            | NM_138682:-449          | Lrrc4         | PROMOTER               | 0.542                                                        | 0.515                          | 1533.76            | 790.29             | 0.280                          | 1204.87            | 336.76             |
| A_68_P27560503 | chr11:4847990-4848034                             | NM_010904:55            | Nefh          | INSIDE                 | 0.542                                                        | 0.436                          | 2764.76            | 1204.94            | 0.236                          | 2271.19            | 536.02             |

| ProbeName      | Target position of probe on CpG island microarray | TargetID               | GeneSymbol    | CpG island Description | Ratio of relative methylation (TiO <sub>2</sub> -NP/Vehicle) | Sham group                     |                    |                    | TiO <sub>2</sub> -H group      |                    |                    |
|----------------|---------------------------------------------------|------------------------|---------------|------------------------|--------------------------------------------------------------|--------------------------------|--------------------|--------------------|--------------------------------|--------------------|--------------------|
|                |                                                   |                        |               |                        |                                                              | Relative methylation (Cy5/Cy3) | Cy3 signal (Input) | Cy5 signal (MeDIP) | Relative methylation (Cy5/Cy3) | Cy3 signal (Input) | Cy5 signal (MeDIP) |
| A_68_P30498007 | chr15:102301316-102301361                         | NM_001103165:276       | Pebp2         | INSIDE                 | 0.542                                                        | 0.688                          | 1724.37            | 1187.17            | 0.373                          | 1255.17            | 468.11             |
| A_68_P24994423 | chr7:20214968-20215012                            | NM_009046:-203         | Relb          | PROMOTER               | 0.542                                                        | 0.679                          | 1367.16            | 927.81             | 0.368                          | 1126.93            | 414.69             |
| A_68_P20596468 | chr1:129574040-129574084                          | NM_028135:536          | Tmem163       | INSIDE                 | 0.542                                                        | 0.553                          | 1420.07            | 785.55             | 0.300                          | 1096.41            | 328.69             |
| A_68_P31335318 | chr17:71966149-71966193                           | NM_175639:616          | Wdr43         | INSIDE                 | 0.542                                                        | 0.536                          | 1731.96            | 927.84             | 0.290                          | 1479.80            | 429.51             |
| A_68_P30657579 | chr16:33381453-33381497                           | NM_011749:614          | Zfp148        | INSIDE                 | 0.542                                                        | 0.588                          | 1881.85            | 1107.05            | 0.319                          | 1357.88            | 432.86             |
| A_68_P20412466 | chr1:88401070-88401114                            |                        |               | Unknown                | 0.542                                                        | 0.595                          | 2556.51            | 1521.12            | 0.323                          | 2060.87            | 664.88             |
| A_68_P25457396 | chr7:125387673-125387717                          | NR_027879:274          | 4930583K01Rik | INSIDE                 | 0.541                                                        | 0.431                          | 2179.68            | 939.57             | 0.233                          | 1564.34            | 364.96             |
| A_68_P25737279 | chr8:28338376-28338420                            | NM_013462:1662         | Adrb3         | INSIDE                 | 0.541                                                        | 0.720                          | 4041.98            | 2911.20            | 0.389                          | 2792.44            | 1087.61            |
| A_68_P29342438 | chr13:114584476-114584520                         | NM_172595:-217         | Arl15         | PROMOTER               | 0.541                                                        | 0.581                          | 1224.91            | 711.98             | 0.315                          | 961.95             | 302.75             |
| A_68_P26948226 | chr10:12642736-12642780                           | NR_038027:167          | B230208H11Rik | INSIDE                 | 0.541                                                        | 0.614                          | 959.35             | 589.19             | 0.332                          | 836.80             | 277.82             |
| A_68_P31125919 | chr17:29230688-29230732                           | NM_007669:-6           | Cdkn1a        | PROMOTER               | 0.541                                                        | 0.612                          | 2807.15            | 1719.38            | 0.331                          | 2049.09            | 678.77             |
| A_68_P23193625 | chr4:107595986-107596030                          | NM_009949:186          | Cpt2          | INSIDE                 | 0.541                                                        | 0.570                          | 1575.74            | 897.86             | 0.308                          | 1261.84            | 388.93             |
| A_68_P29681786 | chr14:67486350-67486394                           | NM_009955:1065         | Dpysl2        | INSIDE                 | 0.541                                                        | 0.609                          | 4537.04            | 2763.69            | 0.330                          | 3389.91            | 1117.68            |
| A_68_P30363918 | chr15:78861120-78861164                           | NM_013847:-161         | Gcat          | PROMOTER               | 0.541                                                        | 0.470                          | 2274.42            | 1068.97            | 0.254                          | 1734.85            | 441.01             |
| A_68_P27189024 | chr10:62485962-62486006                           | NM_001079824:613       | Hnrph3        | INSIDE                 | 0.541                                                        | 0.692                          | 2870.62            | 1986.57            | 0.375                          | 2192.99            | 821.34             |
| A_68_P24126843 | chr5:138086478-138086522                          | NM_010571:442          | Irs3          | INSIDE                 | 0.541                                                        | 0.522                          | 1114.03            | 581.40             | 0.282                          | 1075.10            | 303.33             |
| A_68_P24038700 | chr5:120885515-120885559                          | NM_008499:3642         | Lhx5          | INSIDE                 | 0.541                                                        | 0.456                          | 4240.57            | 1934.99            | 0.247                          | 3343.32            | 825.08             |
| A_68_P28071732 | chr11:100931187-100931231                         | NM_013792:-199         | Naglu         | PROMOTER               | 0.541                                                        | 0.389                          | 1752.33            | 682.15             | 0.211                          | 1435.44            | 302.28             |
| A_68_P24818880 | chr6:125082083-125082127                          | NM_138747:204          | Nop2          | INSIDE                 | 0.541                                                        | 0.519                          | 4512.78            | 2343.53            | 0.281                          | 3630.37            | 1020.18            |
| A_68_P21473128 | chr2:101637014-101637058                          | NM_001083810:828       | Prr51         | INSIDE                 | 0.541                                                        | 0.708                          | 2475.47            | 1753.79            | 0.383                          | 1980.21            | 759.31             |
| A_68_P24609765 | chr6:86321486-86321530                            | NM_026506:-25          | Snrgg         | PROMOTER               | 0.541                                                        | 0.561                          | 980.67             | 550.01             | 0.304                          | 827.07             | 251.16             |
| A_68_P21585133 | chr2:122060313-122060357                          | NM_146126:-240         | Sord          | PROMOTER               | 0.541                                                        | 0.546                          | 1617.85            | 884.11             | 0.296                          | 1450.86            | 429.30             |
| A_68_P27089728 | chr10:41239688-41239732                           | NM_016898:405          | Cd164         | INSIDE                 | 0.540                                                        | 0.390                          | 1355.81            | 529.30             | 0.211                          | 1090.99            | 229.82             |
| A_68_P31614001 | chr18:34811328-34811372                           | NM_178347:40           | Cdc23         | INSIDE                 | 0.540                                                        | 0.692                          | 2518.82            | 1742.23            | 0.373                          | 1822.46            | 680.62             |
| A_68_P32265724 | chrX:12858330-12858374                            | NM_010028:205          | Ddx3x         | INSIDE                 | 0.540                                                        | 0.508                          | 1080.21            | 548.94             | 0.274                          | 445.91             | 122.29             |
| A_68_P22869099 | chr4:42963311-42963355                            | NM_019874:-2633        | Dnajb5        | PROMOTER               | 0.540                                                        | 0.712                          | 1323.06            | 941.75             | 0.384                          | 1081.19            | 415.56             |
| A_68_P24609728 | chr6:86315617-86315661                            | NM_025591:-38          | Fam136a       | PROMOTER               | 0.540                                                        | 0.717                          | 3758.40            | 2694.67            | 0.387                          | 2969.11            | 1150.06            |
| A_68_P21132488 | chr2:35112210-35112254                            | NM_001206367:354       | Gsn           | INSIDE                 | 0.540                                                        | 0.606                          | 1346.80            | 816.75             | 0.328                          | 1093.01            | 358.22             |
| A_68_P21339410 | chr2:74601035-74601079                            | NM_010467:20           | Hoxd1         | INSIDE                 | 0.540                                                        | 0.604                          | 1186.35            | 716.54             | 0.326                          | 957.69             | 312.34             |
| A_68_P29717921 | chr14:73909953-73909997                           | NM_026119:119          | Med4          | INSIDE                 | 0.540                                                        | 0.453                          | 1921.04            | 869.75             | 0.244                          | 1616.83            | 395.26             |
| A_68_P32026208 | chr19:24936124-24936168                           | NM_175013:186          | Pgm5          | INSIDE                 | 0.540                                                        | 0.581                          | 1036.10            | 602.43             | 0.314                          | 837.92             | 263.05             |
| A_68_P21623005 | chr2:128926868-128926912                          | NM_009086:159          | Poir1b        | INSIDE                 | 0.540                                                        | 0.619                          | 1011.25            | 626.33             | 0.334                          | 806.44             | 269.47             |
| A_68_P21901044 | chr2:179776594-179776638                          | NM_011969:491          | Psma7         | INSIDE                 | 0.540                                                        | 0.609                          | 3878.26            | 2362.91            | 0.329                          | 2914.69            | 958.39             |
| A_68_P22405708 | chr3:107135601-107135645                          | NM_001045807:585       | Rbm15         | INSIDE                 | 0.540                                                        | 0.544                          | 1421.81            | 774.13             | 0.294                          | 1190.38            | 349.86             |
| A_68_P25761252 | chr8:33119752-33119796                            | ENSMUST0000080782:-193 |               | PROMOTER               | 0.540                                                        | 0.572                          | 2313.32            | 1322.48            | 0.309                          | 1858.36            | 574.11             |
| A_68_P26528458 | chr9:54765158-54765202                            | NM_177351:84           | Agphd1        | INSIDE                 | 0.539                                                        | 0.449                          | 1164.67            | 523.52             | 0.242                          | 912.64             | 221.10             |
| A_68_P28149796 | chr11:114653639-114653683                         | NM_028055:3546         | Btbd17        | INSIDE                 | 0.539                                                        | 0.605                          | 1012.98            | 612.71             | 0.326                          | 895.07             | 292.07             |
| A_68_P23196910 | chr4:108292768-108292812                          | NM_177045:230          | Ce2d1b        | INSIDE                 | 0.539                                                        | 0.612                          | 4166.43            | 2548.41            | 0.330                          | 2976.81            | 981.07             |
| A_68_P25265479 | chr7:87377398-87377442                            | NM_011870:82           | Cib1          | INSIDE                 | 0.539                                                        | 0.608                          | 4253.81            | 2587.49            | 0.328                          | 3241.80            | 1062.18            |
| A_68_P22305779 | chr3:86724403-86724447                            | NM_001195496:382       | Delc2         | INSIDE                 | 0.539                                                        | 0.310                          | 2021.40            | 626.65             | 0.167                          | 1718.49            | 286.96             |
| A_68_P25609547 | chr7:152025243-152025287                          | NM_008007:748          | Fgf3          | INSIDE                 | 0.539                                                        | 0.604                          | 1651.95            | 997.23             | 0.325                          | 1374.01            | 446.97             |
| A_68_P25944668 | chr8:71317470-71317515                            | NM_027590:-360         | Ints10        | PROMOTER               | 0.539                                                        | 0.605                          | 1118.93            | 677.13             | 0.326                          | 919.07             | 299.85             |
| A_68_P26022615 | chr8:87436867-87436911                            | NM_019945:24364        | Mast1         | INSIDE                 | 0.539                                                        | 0.557                          | 1579.59            | 879.45             | 0.300                          | 1196.93            | 359.25             |
| A_68_P30532723 | chr16:8471005-8471050                             | NM_146247:122          | Mettl22       | INSIDE                 | 0.539                                                        | 0.587                          | 1087.20            | 638.15             | 0.317                          | 803.36             | 254.38             |
| A_68_P20874690 | chr1:182186271-182186316                          | NM_001128605:138       | Psen2         | INSIDE                 | 0.539                                                        | 0.630                          | 2751.06            | 1733.59            | 0.340                          | 2283.29            | 775.66             |
| A_68_P31936308 | chr19:6906036-6906086                             | NM_019924:9031         | Rps6ka4       | INSIDE                 | 0.539                                                        | 3.598                          | 2399.74            | 8634.04            | 1.940                          | 1578.13            | 3060.96            |
| A_68_P27181840 | chr10:61158435-61158479                           | NM_027912:195          | Tysnd1        | INSIDE                 | 0.539                                                        | 0.559                          | 1478.70            | 826.44             | 0.301                          | 1225.02            | 369.29             |
| A_68_P25959007 | chr8:74432656-74432700                            | NM_001166645:174       | Zfp882        | INSIDE                 | 0.539                                                        | 0.635                          | 820.64             | 521.05             | 0.342                          | 739.49             | 252.94             |
| A_68_P30403119 | chr15:85641848-85641892                           | NM_001164625:257       | 2210021J22Rik | INSIDE                 | 0.538                                                        | 0.540                          | 1398.88            | 754.73             | 0.290                          | 1111.34            | 322.74             |
| A_68_P29443675 | chr14:20643061-20643105                           | NM_026528:-37          | 2700060E02Rik | PROMOTER               | 0.538                                                        | 0.615                          | 1171.55            | 720.77             | 0.331                          | 1111.87            | 368.15             |
| A_68_P32054913 | chr19:29879873-29879917                           | NM_172836:605          | 9930021J03Rik | INSIDE                 | 0.538                                                        | 0.475                          | 2404.99            | 1143.19            | 0.256                          | 1820.32            | 465.54             |

| ProbeName      | Target position of probe on CpG island microarray | TargetID               | GeneSymbol | CpG island Description | Ratio of relative methylation (TiO <sub>2</sub> -NP/Vehicle) | Sham group                     |                    |                    | TiO <sub>2</sub> -H group      |                    |                    |
|----------------|---------------------------------------------------|------------------------|------------|------------------------|--------------------------------------------------------------|--------------------------------|--------------------|--------------------|--------------------------------|--------------------|--------------------|
|                |                                                   |                        |            |                        |                                                              | Relative methylation (Cy5/Cy3) | Cy3 signal (Input) | Cy5 signal (MeDIP) | Relative methylation (Cy5/Cy3) | Cy3 signal (Input) | Cy5 signal (MeDIP) |
| A_68_P23595357 | chr5:34959448-34959497                            | NM_001024458:43110     | Add1       | INSIDE                 | 0.538                                                        | 4.228                          | 1353.64            | 5723.59            | 2.273                          | 954.73             | 2170.37            |
| A_68_P21866701 | chr2:172764888-172764932                          | NM_007557:884          | Bmp7       | INSIDE                 | 0.538                                                        | 0.594                          | 2080.97            | 1235.60            | 0.319                          | 1501.23            | 479.30             |
| A_68_P26137126 | chr8:108502836-108502891                          | NM_027960:456          | Dpep3      | INSIDE                 | 0.538                                                        | 5.455                          | 266.55             | 1454.01            | 2.936                          | 209.99             | 616.48             |
| A_68_P26001979 | chr8:83403513-83403557                            | NM_021356:844          | Gab1       | INSIDE                 | 0.538                                                        | 0.401                          | 1993.30            | 800.17             | 0.216                          | 1390.58            | 300.27             |
| A_68_P27235134 | chr10:70844276-70844325                           | NM_027184:33760        | Ipmk       | INSIDE                 | 0.538                                                        | 4.305                          | 163.15             | 702.31             | 2.317                          | 208.29             | 482.53             |
| A_68_P25494915 | chr7:132634916-132634960                          | NM_026330:118          | Nsmce1     | INSIDE                 | 0.538                                                        | 0.678                          | 2798.73            | 1897.41            | 0.365                          | 2099.17            | 765.53             |
| A_68_P26586478 | chr9:65063416-65063460                            | NM_177460:942          | Parp16     | INSIDE                 | 0.538                                                        | 0.609                          | 1142.28            | 695.48             | 0.328                          | 1012.99            | 332.08             |
| A_68_P23162218 | chr4:102432046-102432090                          | NM_144906:899          | Sgip1      | PROMOTER               | 0.538                                                        | 0.433                          | 1480.49            | 640.74             | 0.233                          | 1296.96            | 301.71             |
| A_68_P25195706 | chr7:74904045-74904089                            | NM_183312:562          | Synn       | INSIDE                 | 0.538                                                        | 0.435                          | 1667.21            | 724.89             | 0.234                          | 1472.48            | 344.67             |
| A_68_P22538543 | chr3:132347141-132347185                          | NM_173032:55           | Tbck       | INSIDE                 | 0.538                                                        | 0.648                          | 1433.46            | 928.75             | 0.348                          | 1176.50            | 410.00             |
| A_68_P26978748 | chr10:18734800-18734844                           | NM_001166402:-3053     | Tnfaip3    | PROMOTER               | 0.538                                                        | 0.417                          | 3438.18            | 1432.36            | 0.224                          | 2664.50            | 596.84             |
| A_68_P24287932 | chr6:21801985-21802029                            | NM_173007:509          | Tspan12    | INSIDE                 | 0.538                                                        | 0.517                          | 1203.92            | 1138.52            | 0.278                          | 1836.71            | 510.11             |
| A_68_P24432033 | chr6:49269637-49269686                            | NM_175098:310          | Ccdc126    | INSIDE                 | 0.537                                                        | 0.626                          | 854.45             | 535.11             | 0.336                          | 757.41             | 254.51             |
| A_68_P25015864 | chr7:27951357-27951401                            | NM_053208:443          | Egln2      | INSIDE                 | 0.537                                                        | 0.503                          | 3145.81            | 1582.63            | 0.270                          | 2313.69            | 625.17             |
| A_68_P21229090 | chr2:54288809-54288853                            | NM_173030:33           | Galnt13    | INSIDE                 | 0.537                                                        | 0.475                          | 2104.72            | 998.70             | 0.255                          | 1616.68            | 412.23             |
| A_68_P32056973 | chr19:30249514-30249558                           | NM_138595:372          | Gldc       | INSIDE                 | 0.537                                                        | 0.693                          | 1365.76            | 946.23             | 0.372                          | 1000.56            | 372.57             |
| A_68_P31978257 | chr19:16208260-16208304                           | NM_008139:962          | Gnaq       | INSIDE                 | 0.537                                                        | 0.350                          | 1795.94            | 629.12             | 0.188                          | 1381.92            | 260.20             |
| A_68_P20510206 | chr1:108656242-108656286                          | NM_027534:55           | Kdsr       | INSIDE                 | 0.537                                                        | 0.574                          | 2879.18            | 1652.62            | 0.308                          | 2172.45            | 670.18             |
| A_68_P23985659 | chr5:111846818-111846862                          | NM_001081235:-345      | Mn1        | PROMOTER               | 0.537                                                        | 0.453                          | 1403.31            | 635.91             | 0.243                          | 1104.49            | 268.77             |
| A_68_P21639373 | chr2:132078980-132079024                          | NM_011045:-86          | Pena       | DIVERGENT_PROMOTER     | 0.537                                                        | 0.674                          | 1327.11            | 894.74             | 0.362                          | 1078.25            | 390.50             |
| A_68_P26920793 | chr10:7512764-7512808                             | NM_026141:95           | Ppil4      | INSIDE                 | 0.537                                                        | 0.520                          | 1395.72            | 725.17             | 0.279                          | 1023.24            | 285.45             |
| A_68_P29578888 | chr14:47504466-47504510                           | NM_001037221:1849      | Samd4      | INSIDE                 | 0.537                                                        | 0.459                          | 2559.16            | 1174.53            | 0.246                          | 2128.73            | 524.34             |
| A_68_P27915806 | chr11:73013237-73013281                           | NM_029031:275          | Shpk       | INSIDE                 | 0.537                                                        | 0.571                          | 1243.69            | 710.72             | 0.307                          | 961.60             | 295.21             |
| A_68_P25016925 | chr7:28146852-28146896                            | NM_001199235:32651     | Spm4       | INSIDE                 | 0.537                                                        | 0.575                          | 1653.97            | 950.83             | 0.309                          | 1471.23            | 453.96             |
| A_68_P27841686 | chr11:60033953-60033997                           | NM_011480:132          | Srebf1     | INSIDE                 | 0.537                                                        | 0.480                          | 1636.00            | 785.54             | 0.258                          | 1292.43            | 333.03             |
| A_68_P20302824 | chr1:66515076-66515120                            | NM_175510:78           | Unc80      | INSIDE                 | 0.537                                                        | 0.442                          | 2680.25            | 1183.87            | 0.237                          | 2131.57            | 505.42             |
| A_68_P26495379 | chr9:48863756-48863800                            | NM_012039:93           | Zw10       | INSIDE                 | 0.537                                                        | 0.706                          | 1299.77            | 917.03             | 0.379                          | 1151.55            | 436.01             |
| A_68_P30665013 | chr16:34573097-34573141                           | ENSMUST00000114961:500 |            | INSIDE                 | 0.537                                                        | 0.728                          | 3479.74            | 2532.98            | 0.391                          | 2622.93            | 1025.69            |
| A_68_P32186047 | chr19:54119811-54119855                           | NM_007417:161          | Adra2a     | INSIDE                 | 0.536                                                        | 0.587                          | 3096.72            | 1818.20            | 0.315                          | 2514.63            | 791.42             |
| A_68_P22970308 | chr4:63071362-63071406                            | NM_001045514:-6905     | Akna       | PROMOTER               | 0.536                                                        | 0.613                          | 1618.74            | 991.68             | 0.328                          | 1251.62            | 410.78             |
| A_68_P23897548 | chr5:93473182-93473226                            | NM_175270:844          | Ankrd56    | INSIDE                 | 0.536                                                        | 0.504                          | 2230.22            | 1123.66            | 0.270                          | 1844.26            | 498.19             |
| A_68_P21615857 | chr2:127657373-127657417                          | NM_001113179:201       | Bub1       | INSIDE                 | 0.536                                                        | 0.610                          | 1653.90            | 1008.38            | 0.327                          | 1335.81            | 436.17             |
| A_68_P26170766 | chr8:114414003-114414047                          | NM_019950:20075        | Chst5      | INSIDE                 | 0.536                                                        | 0.485                          | 2072.53            | 1004.22            | 0.260                          | 1651.10            | 429.15             |
| A_68_P21706947 | chr2:144219117-144219161                          | NM_181417:24368        | Carp2bp    | INSIDE                 | 0.536                                                        | 2.854                          | 879.23             | 2509.04            | 1.530                          | 714.56             | 1093.14            |
| A_68_P30350021 | chr15:76528223-76528267                           | NM_182805:1051         | Gpt        | INSIDE                 | 0.536                                                        | 0.499                          | 2407.88            | 1201.20            | 0.267                          | 1944.87            | 520.05             |
| A_68_P28269097 | chr12:17183053-17183097                           | NM_201531:620          | Kcnf1      | INSIDE                 | 0.536                                                        | 0.706                          | 1723.04            | 1217.03            | 0.378                          | 1194.79            | 452.14             |
| A_68_P25954147 | chr8:73321717-73321761                            | NM_199308:-5406        | Mast3      | PROMOTER               | 0.536                                                        | 0.676                          | 1483.89            | 1002.87            | 0.362                          | 1063.48            | 384.95             |
| A_68_P31734231 | chr18:57292496-57292540                           | NM_001001979:-225      | Megf10     | PROMOTER               | 0.536                                                        | 0.632                          | 1758.89            | 1111.93            | 0.339                          | 1408.68            | 477.32             |
| A_68_P20593974 | chr1:129101586-129101630                          | NM_145128:46           | Mgat5      | INSIDE                 | 0.536                                                        | 0.540                          | 1337.71            | 722.43             | 0.290                          | 1015.63            | 294.19             |
| A_68_P20370459 | chr1:78200539-78200583                            | NM_001159520:-6849     | Pax3       | PROMOTER               | 0.536                                                        | 0.683                          | 1263.90            | 862.82             | 0.366                          | 1074.63            | 393.14             |
| A_68_P31655262 | chr18:42553965-42554009                           | NM_138945:-264         | Pou4f3     | PROMOTER               | 0.536                                                        | 0.470                          | 2878.95            | 1352.84            | 0.252                          | 2437.99            | 614.19             |
| A_68_P28549421 | chr12:76697259-76697303                           | NM_012024:-93          | Ppp2r5e    | PROMOTER               | 0.536                                                        | 0.576                          | 3414.71            | 1966.81            | 0.309                          | 2422.58            | 748.13             |
| A_68_P25094132 | chr7:52884421-52884465                            | NM_028544:1536         | Rasip1     | INSIDE                 | 0.536                                                        | 1.350                          | 2985.70            | 4029.90            | 0.724                          | 2220.03            | 1606.46            |
| A_68_P23993053 | chr5:113006095-113006139                          | NM_019982:89           | Sezfl      | INSIDE                 | 0.536                                                        | 0.541                          | 3984.37            | 2155.95            | 0.290                          | 3078.01            | 892.33             |
| A_68_P23187158 | chr4:106584284-106584328                          | NM_023672:232          | Ssbp3      | INSIDE                 | 0.536                                                        | 0.538                          | 1632.94            | 877.89             | 0.288                          | 1352.29            | 389.68             |
| A_68_P25092468 | chr7:52588927-52588971                            | NM_175130:202          | Trpm4      | INSIDE                 | 0.536                                                        | 0.543                          | 2576.90            | 1399.29            | 0.291                          | 1828.71            | 532.36             |
| A_68_P25143365 | chr7:63049393-63049437                            | NM_146190:-103         | Tubeap5    | PROMOTER               | 0.536                                                        | 1.392                          | 4737.08            | 6594.67            | 0.747                          | 3718.33            | 2776.19            |
| A_68_P32363627 | chrX:45610039-45610084                            | NM_028276:-49          | Utp14a     | PROMOTER               | 0.536                                                        | 0.539                          | 1200.53            | 647.27             | 0.289                          | 404.71             | 116.99             |
| A_68_P29113346 | chr13:69137647-69137691                           | NM_153534:751          | Adecy2     | INSIDE                 | 0.535                                                        | 0.440                          | 1345.71            | 592.01             | 0.236                          | 1189.35            | 280.10             |
| A_68_P30589273 | chr16:20733395-20733439                           | NM_009893:217          | Chrd       | INSIDE                 | 0.535                                                        | 0.496                          | 1500.39            | 744.75             | 0.265                          | 1252.52            | 332.43             |
| A_68_P21338549 | chr2:74494232-74494276                            | NM_007967:3222         | Evx2       | INSIDE                 | 0.535                                                        | 0.346                          | 2116.62            | 731.62             | 0.185                          | 1745.05            | 322.58             |

| ProbeName      | Target position of probe on CpG island microarray | TargetID               | GeneSymbol    | CpG island Description | Ratio of relative methylation (TiO <sub>2</sub> -NP/Vehicle) | Sham group                     |                    |                    | TiO <sub>2</sub> -H group      |                    |                    |
|----------------|---------------------------------------------------|------------------------|---------------|------------------------|--------------------------------------------------------------|--------------------------------|--------------------|--------------------|--------------------------------|--------------------|--------------------|
|                |                                                   |                        |               |                        |                                                              | Relative methylation (Cy5/Cy3) | Cy3 signal (Input) | Cy5 signal (MeDIP) | Relative methylation (Cy5/Cy3) | Cy3 signal (Input) | Cy5 signal (MeDIP) |
| A_68_P28707019 | chr12:106271229-106271273                         | NM_028419:352          | Glxr5         | INSIDE                 | 0.535                                                        | 0.396                          | 1445.97            | 572.75             | 0.212                          | 1100.45            | 232.99             |
| A_68_P20648919 | chr1:138845800-138845844                          | NM_001159769:4385      | Nr5a2         | INSIDE                 | 0.535                                                        | 0.399                          | 1742.35            | 696.01             | 0.214                          | 1534.85            | 327.94             |
| A_68_P31676055 | chr18:46440555-46440599                           | NM_172627:-72          | Pggt1b        | PROMOTER               | 0.535                                                        | 0.619                          | 1297.61            | 802.79             | 0.331                          | 1152.58            | 381.29             |
| A_68_P24428257 | chr6:48551937-48551981                            | NM_001079901:8077      | Repin1        | DOWNSTREAM             | 0.535                                                        | 0.531                          | 4169.93            | 2214.12            | 0.284                          | 3189.15            | 905.31             |
| A_68_P24043184 | chr5:121654997-121655041                          | NM_011290:509          | Rpl6          | INSIDE                 | 0.535                                                        | 0.663                          | 1199.86            | 795.04             | 0.354                          | 982.68             | 348.03             |
| A_68_P27282240 | chr10:79755289-79755333                           | NM_009091:135          | Rps15         | INSIDE                 | 0.535                                                        | 0.667                          | 1450.87            | 967.98             | 0.357                          | 1121.97            | 400.75             |
| A_68_P22342542 | chr3:94965500-94965544                            | NM_011351:-2773        | Sema6c        | PROMOTER               | 0.535                                                        | 0.571                          | 1346.41            | 768.17             | 0.305                          | 1051.43            | 320.68             |
| A_68_P20886548 | chr1:184339548-184339592                          | NM_173378:273          | Trp53bp2      | INSIDE                 | 0.535                                                        | 0.618                          | 889.01             | 549.56             | 0.331                          | 808.57             | 267.35             |
| A_68_P25499299 | chr7:133343490-133343534                          | NM_028816:410          | Xpo6          | INSIDE                 | 0.535                                                        | 0.735                          | 3441.86            | 2530.75            | 0.394                          | 2583.45            | 1016.96            |
| A_68_P23255466 | chr4:120887199-120887243                          | ENSMUST00000056635:469 |               | INSIDE                 | 0.535                                                        | 0.471                          | 1690.16            | 795.81             | 0.252                          | 1419.38            | 357.76             |
| A_68_P21224226 | chr2:53051139-53051183                            | NM_022989:43           | Arl6ip6       | INSIDE                 | 0.534                                                        | 0.426                          | 1242.49            | 529.75             | 0.228                          | 1089.20            | 248.21             |
| A_68_P23895411 | chr5:93104067-93104111                            | NM_177230:65           | Ccdc158       | INSIDE                 | 0.534                                                        | 0.730                          | 1930.12            | 1408.97            | 0.390                          | 1535.13            | 598.00             |
| A_68_P29134804 | chr13:72766185-72766229                           | NR_030701:-194         | D430050G20    | DIVERGENT_PROMOTER     | 0.534                                                        | 0.472                          | 2227.09            | 1050.28            | 0.252                          | 1665.29            | 419.72             |
| A_68_P24735991 | chr6:108779125-108779169                          | NM_138677:512          | Edem1         | INSIDE                 | 0.534                                                        | 0.594                          | 884.04             | 524.77             | 0.317                          | 706.55             | 224.11             |
| A_68_P28530004 | chr12:73172194-73172239                           | NM_181752:-238         | Gpr135        | PROMOTER               | 0.534                                                        | 0.608                          | 1217.10            | 740.47             | 0.325                          | 1036.36            | 336.95             |
| A_68_P22565463 | chr3:137527117-137527161                          | NM_016750:-424         | H2afz         | PROMOTER               | 0.534                                                        | 0.415                          | 2737.64            | 1135.15            | 0.221                          | 2273.51            | 503.52             |
| A_68_P29054563 | chr13:55463630-55463674                           | NM_025828:492          | Lman2         | INSIDE                 | 0.534                                                        | 0.582                          | 2594.81            | 1511.19            | 0.311                          | 1910.63            | 594.39             |
| A_68_P30557333 | chr16:13448464-13448508                           | NR_030549:-1129        | Mir193b       | PROMOTER               | 0.534                                                        | 0.562                          | 2408.52            | 1353.68            | 0.300                          | 1803.85            | 541.31             |
| A_68_P20449355 | chr1:94370405-94370449                            | NM_024197:-91          | Ndufa10       | PROMOTER               | 0.534                                                        | 0.626                          | 889.06             | 556.74             | 0.334                          | 644.07             | 215.30             |
| A_68_P26388504 | chr9:29219516-29219560                            | NM_172290:551176       | Ntm           | INSIDE                 | 0.534                                                        | 0.666                          | 1955.15            | 1303.07            | 0.356                          | 1485.82            | 528.84             |
| A_68_P28863266 | chr13:19714869-19714913                           | NM_016687:-153         | Sfrp4         | DIVERGENT_PROMOTER     | 0.534                                                        | 0.699                          | 1695.05            | 1184.97            | 0.373                          | 1424.99            | 531.78             |
| A_68_P32185502 | chr19:54019941-54019985                           | NM_019658:597          | Shoc2         | INSIDE                 | 0.534                                                        | 0.645                          | 1907.01            | 1229.57            | 0.344                          | 1454.47            | 500.38             |
| A_68_P31943153 | chr19:8787770-8787814                             | NM_008577:595          | Slc3a2        | INSIDE                 | 0.534                                                        | 0.676                          | 1585.38            | 1072.11            | 0.361                          | 1172.38            | 423.18             |
| A_68_P26580558 | chr9:64027298-64027342                            | NM_183316:217          | Snapc5        | INSIDE                 | 0.534                                                        | 0.572                          | 2819.00            | 1612.87            | 0.305                          | 2279.26            | 696.29             |
| A_68_P31919099 | chr19:3767561-3767605                             | NM_001167884:162       | Suv420h1      | INSIDE                 | 0.534                                                        | 0.520                          | 1448.19            | 752.98             | 0.278                          | 1192.43            | 331.36             |
| A_68_P20444771 | chr1:93699116-93699160                            | NM_007855:1085         | Twist2        | INSIDE                 | 0.534                                                        | 0.530                          | 1369.72            | 726.43             | 0.283                          | 1052.66            | 298.32             |
| A_68_P28931385 | chr13:32894778-32894822                           | NM_030215:902          | Wrnip1        | INSIDE                 | 0.534                                                        | 0.472                          | 1235.22            | 583.52             | 0.252                          | 899.07             | 226.98             |
| A_68_P26595475 | chr9:66683088-66683132                            | NM_026674:-597         | Aph1c         | PROMOTER               | 0.533                                                        | 0.569                          | 3058.67            | 1739.29            | 0.286                          | 2286.37            | 693.61             |
| A_68_P29246781 | chr13:97313402-97313446                           | NM_001164222:735       | Col4a3bp      | INSIDE                 | 0.533                                                        | 0.540                          | 2701.59            | 1460.20            | 0.288                          | 2053.29            | 591.26             |
| A_68_P25362942 | chr7:106775190-106775234                          | NM_001195529:401       | Gm4980        | INSIDE                 | 0.533                                                        | 0.469                          | 1476.70            | 691.87             | 0.250                          | 1077.85            | 269.29             |
| A_68_P25473609 | chr7:128536673-128536717                          | NM_001081327:885       | Hs3st2        | INSIDE                 | 0.533                                                        | 0.527                          | 1665.04            | 877.49             | 0.281                          | 1382.91            | 388.38             |
| A_68_P27950599 | chr11:79525184-79525228                           | NR_029579:-264         | Mir193        | PROMOTER               | 0.533                                                        | 0.346                          | 2199.70            | 761.37             | 0.184                          | 1904.29            | 351.12             |
| A_68_P20640025 | chr1:137429239-137429283                          | NM_173437:52672        | Nav1          | INSIDE                 | 0.533                                                        | 2.979                          | 2700.63            | 8045.90            | 1.589                          | 1960.85            | 3116.36            |
| A_68_P30146831 | chr15:37891066-37891112                           | NM_199476:-278         | Rrm2b         | PROMOTER               | 0.533                                                        | 0.634                          | 998.11             | 632.36             | 0.338                          | 902.89             | 304.89             |
| A_68_P26844288 | chr9:114277438-114277482                          | NM_019922:22370        | Crtap         | DOWNSTREAM             | 0.532                                                        | 0.503                          | 1497.39            | 753.86             | 0.268                          | 1268.14            | 339.71             |
| A_68_P23336251 | chr4:136392310-136392354                          | NM_010142:-482         | Ephb2         | PROMOTER               | 0.532                                                        | 0.641                          | 1804.03            | 1156.03            | 0.341                          | 1498.37            | 510.35             |
| A_68_P20720547 | chr1:154247487-154247531                          | NM_177756:512          | Glt25d2       | INSIDE                 | 0.532                                                        | 0.630                          | 1331.51            | 838.96             | 0.335                          | 937.45             | 314.34             |
| A_68_P28071796 | chr11:100941137-100941181                         | NM_010475:1434         | Hsd17b1       | INSIDE                 | 0.532                                                        | 0.657                          | 1392.13            | 915.02             | 0.350                          | 1086.16            | 379.97             |
| A_68_P30925477 | chr16:84774396-84774440                           | NM_023844:51           | Jam2          | INSIDE                 | 0.532                                                        | 0.733                          | 2998.51            | 2199.19            | 0.391                          | 2229.88            | 870.81             |
| A_68_P20510205 | chr1:108656151-108656195                          | NM_027534:147          | Kdsr          | INSIDE                 | 0.532                                                        | 0.685                          | 1556.75            | 1066.07            | 0.364                          | 1233.63            | 449.37             |
| A_68_P28032110 | chr11:94183065-94183109                           | NM_026313:139          | Luc7l3        | INSIDE                 | 0.532                                                        | 0.714                          | 1852.21            | 1323.37            | 0.380                          | 1152.22            | 438.26             |
| A_68_P30424873 | chr15:89209271-89209315                           | NM_001013022:393       | Odf3b         | INSIDE                 | 0.532                                                        | 0.701                          | 5150.98            | 3609.14            | 0.373                          | 3802.05            | 1416.55            |
| A_68_P30961690 | chr16:91226016-91226060                           | NM_016967:244          | Olig2         | INSIDE                 | 0.532                                                        | 0.696                          | 1090.68            | 758.73             | 0.370                          | 925.55             | 342.54             |
| A_68_P22467630 | chr3:119485493-119485539                          | NM_019550:790          | Ptpb2         | INSIDE                 | 0.532                                                        | 0.711                          | 1604.82            | 1140.42            | 0.378                          | 1134.49            | 428.65             |
| A_68_P27942192 | chr11:78059616-78059660                           | NM_009143:391          | Sdf2          | INSIDE                 | 0.532                                                        | 0.569                          | 1964.93            | 1117.66            | 0.303                          | 1486.96            | 450.02             |
| A_68_P21760344 | chr2:154233694-154233738                          | NM_009228:104          | Snta1         | INSIDE                 | 0.532                                                        | 0.555                          | 1883.34            | 1044.62            | 0.295                          | 1697.06            | 500.75             |
| A_68_P22049390 | chr3:34549137-34549181                            | NM_011443:232          | Sox2          | INSIDE                 | 0.532                                                        | 0.527                          | 2314.83            | 1219.76            | 0.280                          | 1864.55            | 522.61             |
| A_68_P27995863 | chr11:87551226-87551270                           | NM_009296:182          | Supt4h1       | INSIDE                 | 0.532                                                        | 0.552                          | 1604.92            | 885.25             | 0.293                          | 1244.19            | 364.88             |
| A_68_P25352336 | chr7:104937141-104937185                          | ENSMUST00000172423:112 |               | INSIDE                 | 0.532                                                        | 0.417                          | 2664.85            | 1110.47            | 0.222                          | 2289.28            | 507.92             |
| A_68_P20411732 | chr1:88256159-88256203                            | NR_015507:32           | C130036L24Rik | INSIDE                 | 0.531                                                        | 0.584                          | 2833.67            | 1653.54            | 0.310                          | 2282.19            | 706.71             |
| A_68_P28187624 | chr11:120794237-120794281                         | NM_027745:-72          | Ccdc57        | PROMOTER               | 0.531                                                        | 0.630                          | 979.24             | 616.72             | 0.334                          | 694.21             | 232.19             |

| ProbeName      | Target position of probe on CpG island microarray | TargetID                 | GeneSymbol    | CpG island Description | Ratio of relative methylation (TiO <sub>2</sub> -NP/Vehicle) | Sham group                     |                    |                    | TiO <sub>2</sub> -H group      |                    |                    |
|----------------|---------------------------------------------------|--------------------------|---------------|------------------------|--------------------------------------------------------------|--------------------------------|--------------------|--------------------|--------------------------------|--------------------|--------------------|
|                |                                                   |                          |               |                        |                                                              | Relative methylation (Cy5/Cy3) | Cy3 signal (Input) | Cy5 signal (MeDIP) | Relative methylation (Cy5/Cy3) | Cy3 signal (Input) | Cy5 signal (MeDIP) |
| A_68_P26127989 | chr8:106864528-106864572                          | NM_024217:57             | Cntm3         | INSIDE                 | 0.531                                                        | 3.567                          | 2705.88            | 9651.50            | 1.893                          | 1636.22            | 3097.11            |
| A_68_P20266463 | chr1:59970586-59970630                            | NM_001037725:759         | Fam117b       | INSIDE                 | 0.531                                                        | 0.741                          | 2514.61            | 1862.46            | 0.393                          | 2202.29            | 865.86             |
| A_68_P23590782 | chr5:34064726-34064770                            | NM_001163216:-206        | Fgfr3         | PROMOTER               | 0.531                                                        | 0.689                          | 1161.14            | 800.35             | 0.366                          | 854.02             | 312.68             |
| A_68_P29543501 | chr14:37948355-37948400                           | NM_001199122:-52         | Ghitm         | PROMOTER               | 0.531                                                        | 0.660                          | 1103.99            | 728.97             | 0.351                          | 924.81             | 324.34             |
| A_68_P30575507 | chr16:17759672-17759716                           | NM_145479:-19            | Klhl22        | PROMOTER               | 0.531                                                        | 0.600                          | 3488.89            | 2093.91            | 0.319                          | 2907.37            | 926.01             |
| A_68_P23279071 | chr4:125932970-125933014                          | NM_001145970:571         | Mtap7d1       | INSIDE                 | 0.531                                                        | 0.416                          | 3133.26            | 1304.23            | 0.221                          | 2249.58            | 497.33             |
| A_68_P20611337 | chr1:132612275-132612319                          | NM_001162416:-1143       | Pfkfb2        | PROMOTER               | 0.531                                                        | 0.423                          | 1200.60            | 507.44             | 0.225                          | 1033.62            | 232.06             |
| A_68_P29094157 | chr13:63664712-63664756                           | NM_008957:2094           | Ptch1         | INSIDE                 | 0.531                                                        | 0.641                          | 1748.04            | 1119.74            | 0.340                          | 1306.15            | 444.22             |
| A_68_P27278803 | chr10:79229502-79229546                           | NM_144528:142            | Rnf126        | INSIDE                 | 0.531                                                        | 0.634                          | 2469.59            | 1565.00            | 0.337                          | 1791.62            | 602.94             |
| A_68_P27332529 | chr10:89148969-89149013                           | NM_198021:40             | Scyl2         | INSIDE                 | 0.531                                                        | 0.697                          | 1423.12            | 991.24             | 0.370                          | 1195.74            | 441.94             |
| A_68_P24120067 | chr5:136707928-136707972                          | NM_018825:12823          | Sh2b2         | INSIDE                 | 0.531                                                        | 2.580                          | 2576.89            | 6648.62            | 1.370                          | 1811.15            | 2481.20            |
| A_68_P25952345 | chr8:73033987-73034031                            | NM_019883:258            | Uba52         | INSIDE                 | 0.531                                                        | 0.523                          | 1817.14            | 951.17             | 0.278                          | 1421.48            | 395.29             |
| A_68_P31255137 | chr17:56443079-56443123                           | NM_001111078:-635        | Uhrf1         | PROMOTER               | 0.531                                                        | 0.361                          | 2256.96            | 815.72             | 0.192                          | 1682.86            | 323.24             |
| A_68_P26884795 | chr9:121578529-121578573                          | NM_011703:26717          | Vipr1         | INSIDE                 | 0.531                                                        | 0.618                          | 2321.23            | 1433.59            | 0.328                          | 1719.39            | 563.48             |
| A_68_P32133761 | chr19:44758930-44758974                           | ENSMUST00000166501:10813 |               | DOWNSTREAM             | 0.531                                                        | 0.470                          | 2258.10            | 1060.93            | 0.249                          | 1733.64            | 432.31             |
| A_68_P29091170 | chr13:49308460-130384504                          | NM_026916:73             | 4930579G22Rik | INSIDE                 | 0.530                                                        | 0.567                          | 2042.86            | 1157.47            | 0.300                          | 1718.06            | 515.90             |
| A_68_P31849682 | chr18:78013054-78013098                           | NM_007505:570            | Atp5a1        | INSIDE                 | 0.530                                                        | 0.666                          | 6049.71            | 4029.27            | 0.353                          | 4937.87            | 1742.18            |
| A_68_P26486118 | chr9:47338069-47338113                            | NM_001025600:-344        | Cadm1         | PROMOTER               | 0.530                                                        | 0.478                          | 1112.89            | 532.05             | 0.253                          | 837.34             | 212.03             |
| A_68_P28776179 | chr12:119081965-119082009                         | NM_146040:-347           | Cdea7l        | PROMOTER               | 0.530                                                        | 0.596                          | 922.78             | 549.92             | 0.316                          | 763.66             | 241.31             |
| A_68_P23541889 | chr5:23950730-23950774                            | NM_023229:301            | Fastk         | INSIDE                 | 0.530                                                        | 0.581                          | 1987.04            | 1153.56            | 0.308                          | 1611.98            | 495.89             |
| A_68_P30347360 | chr15:76124857-76124901                           | NM_001195537:15          | Gm10345       | INSIDE                 | 0.530                                                        | 0.563                          | 1041.93            | 586.88             | 0.299                          | 872.91             | 260.61             |
| A_68_P30500796 | chr15:102765447-102765491                         | NM_010463:-1815          | Hoxc12        | PROMOTER               | 0.530                                                        | 0.579                          | 1629.59            | 944.23             | 0.307                          | 1508.98            | 463.54             |
| A_68_P26716008 | chr9:90008880-90008924                            | NM_001039147:756         | Morf4l1       | INSIDE                 | 0.530                                                        | 0.675                          | 5682.17            | 3835.14            | 0.358                          | 4100.41            | 1466.62            |
| A_68_P29001574 | chr13:45485076-45485120                           | NM_153789:-12            | Myliip        | PROMOTER               | 0.530                                                        | 0.531                          | 1866.41            | 991.57             | 0.281                          | 1653.44            | 465.34             |
| A_68_P25353895 | chr7:105259944-105259988                          | NM_008663:8037           | Myo7a         | INSIDE                 | 0.530                                                        | 0.700                          | 1793.40            | 1255.01            | 0.371                          | 1483.63            | 550.32             |
| A_68_P20632581 | chr1:136195963-136196007                          | NM_001144855:33521       | Ppfia4        | INSIDE                 | 0.530                                                        | 0.643                          | 2492.75            | 1602.60            | 0.341                          | 1852.97            | 631.25             |
| A_68_P25553144 | chr7:142729766-142729810                          | NM_011212:282            | Ptpr          | INSIDE                 | 0.530                                                        | 0.582                          | 1821.22            | 1059.71            | 0.308                          | 1581.80            | 487.82             |
| A_68_P32773804 | chrX:155693758-155693802                          | NM_148945:-271           | Rps6ka3       | PROMOTER               | 0.530                                                        | 3.452                          | 4698.70            | 16218.21           | 1.829                          | 2372.12            | 4339.42            |
| A_68_P20354344 | chr1:75476279-75476323                            | NM_177056:194            | Tmem198       | INSIDE                 | 0.530                                                        | 0.438                          | 2068.17            | 905.45             | 0.232                          | 1589.86            | 369.02             |
| A_68_P23594734 | chr5:34856584-34856628                            | NM_139064:22             | Tnip2         | INSIDE                 | 0.530                                                        | 0.519                          | 2578.87            | 1339.05            | 0.275                          | 2021.01            | 555.90             |
| A_68_P22341859 | chr3:94819900-94819945                            | NM_030074:-762           | Zfp687        | PROMOTER               | 0.530                                                        | 0.544                          | 1255.30            | 682.68             | 0.288                          | 1007.23            | 290.23             |
| A_68_P30476331 | chr15:98593814-98593858                           | NM_007478:-287           | Arf3          | PROMOTER               | 0.529                                                        | 0.434                          | 1932.01            | 839.28             | 0.230                          | 1535.45            | 352.93             |
| A_68_P24330599 | chr6:30125667-30125711                            | NR_038124:-934           | BB283400      | DIVERGENT_PROMOTER     | 0.529                                                        | 0.471                          | 1364.52            | 642.08             | 0.249                          | 1005.33            | 250.05             |
| A_68_P29449134 | chr14:21613118-21613162                           | NM_001039138:170         | Camk2g        | INSIDE                 | 0.529                                                        | 0.294                          | 1853.08            | 544.01             | 0.155                          | 1427.08            | 221.52             |
| A_68_P30135998 | chr15:35867761-35867805                           | NM_053071:219            | Cox6c         | INSIDE                 | 0.529                                                        | 0.432                          | 1432.50            | 618.45             | 0.229                          | 1182.85            | 270.29             |
| A_68_P24138259 | chr5:140384979-140385023                          | NM_175522:1104           | Elfn1         | INSIDE                 | 0.529                                                        | 0.635                          | 1341.42            | 851.77             | 0.336                          | 1017.60            | 341.66             |
| A_68_P28152627 | chr11:115158906-115158950                         | NM_178035:-68            | Fads6         | DIVERGENT_PROMOTER     | 0.529                                                        | 0.592                          | 1506.01            | 892.06             | 0.313                          | 1283.10            | 402.22             |
| A_68_P22071617 | chr3:38787100-38787144                            | NM_183221:1261           | Fat4          | INSIDE                 | 0.529                                                        | 0.639                          | 1698.34            | 1084.82            | 0.338                          | 1263.31            | 426.53             |
| A_68_P27973307 | chr11:83567440-83567484                           | NM_145432:324            | Heatr6        | INSIDE                 | 0.529                                                        | 0.647                          | 1670.46            | 1080.41            | 0.342                          | 1291.74            | 441.55             |
| A_68_P31259697 | chr17:57171063-57171108                           | NM_010613:-155           | Khsrp         | PROMOTER               | 0.529                                                        | 0.585                          | 1395.41            | 816.58             | 0.310                          | 1094.26            | 338.73             |
| A_68_P28192099 | chr11:121563822-121563866                         | NM_144797:104            | Metml         | INSIDE                 | 0.529                                                        | 0.553                          | 1960.77            | 1085.19            | 0.293                          | 1643.80            | 481.06             |
| A_68_P23536414 | chr5:22940038-22940082                            | NM_026984:-186           | Mil5          | PROMOTER               | 0.529                                                        | 0.407                          | 1445.13            | 587.67             | 0.215                          | 1076.97            | 231.55             |
| A_68_P20188963 | chr1:43503219-43503263                            | NM_010879:645            | Nck2          | INSIDE                 | 0.529                                                        | 0.657                          | 2062.99            | 1356.04            | 0.347                          | 1601.98            | 556.67             |
| A_68_P31415146 | chr17:86568164-86568208                           | NM_011104:1062           | Prkce         | INSIDE                 | 0.529                                                        | 0.635                          | 1508.75            | 957.50             | 0.336                          | 1104.97            | 370.74             |
| A_68_P27503751 | chr10:120912576-120912620                         | NM_138956:708            | Rassf3        | INSIDE                 | 0.529                                                        | 0.636                          | 2735.34            | 1740.44            | 0.337                          | 2085.38            | 702.08             |
| A_68_P27833616 | chr11:58751821-58751865                           | NM_022423:566            | Rnf187        | INSIDE                 | 0.529                                                        | 0.642                          | 846.79             | 543.99             | 0.340                          | 674.29             | 229.19             |
| A_68_P24120068 | chr5:136708025-136708069                          | NM_018825:12727          | Sh2b2         | INSIDE                 | 0.529                                                        | 2.946                          | 1957.15            | 5765.04            | 1.560                          | 1345.02            | 2097.57            |
| A_68_P26394906 | chr9:30234770-30234814                            | NM_028874:-121           | Snx19         | PROMOTER               | 0.529                                                        | 0.634                          | 2493.71            | 1580.00            | 0.335                          | 2136.38            | 716.08             |
| A_68_P23590340 | chr5:34000396-34000440                            | NM_026698:63             | Tmem129       | INSIDE                 | 0.529                                                        | 0.552                          | 1864.36            | 1029.78            | 0.292                          | 1445.13            | 422.26             |
| A_68_P29531327 | chr14:35487897-35487941                           | NM_001004436:805         | Wapal         | INSIDE                 | 0.529                                                        | 0.629                          | 1321.86            | 831.18             | 0.333                          | 1027.48            | 341.99             |
| A_68_P25269627 | chr7:88137961-88138005                            | NM_178707:-587           | Zfp592        | PROMOTER               | 0.529                                                        | 0.475                          | 1775.37            | 842.83             | 0.251                          | 1519.33            | 381.72             |

| ProbeName      | Target position of probe on CpG island microarray | TargetID           | GeneSymbol    | CpG island Description | Ratio of relative methylation (TiO <sub>2</sub> -NP/Vehicle) | Sham group                     |                    |                    | TiO <sub>2</sub> -H group      |                    |                    |
|----------------|---------------------------------------------------|--------------------|---------------|------------------------|--------------------------------------------------------------|--------------------------------|--------------------|--------------------|--------------------------------|--------------------|--------------------|
|                |                                                   |                    |               |                        |                                                              | Relative methylation (Cy5/Cy3) | Cy3 signal (Input) | Cy5 signal (MeDIP) | Relative methylation (Cy5/Cy3) | Cy3 signal (Input) | Cy5 signal (MeDIP) |
| A_68_P25604019 | chr7:151165292-151165337                          |                    |               | Unknown                | 0.529                                                        | 0.434                          | 1469.68            | 637.78             | 0.230                          | 1170.38            | 268.85             |
| A_68_P29613142 | chr14:55203593-55203649                           | NM_028890:21125    | 4931414P19Rik | INSIDE                 | 0.528                                                        | 3.177                          | 531.23             | 1687.54            | 1.678                          | 473.37             | 794.39             |
| A_68_P27571287 | chr11:6963887-6963931                             | NM_009622:417      | Adey1         | INSIDE                 | 0.528                                                        | 0.561                          | 1086.20            | 609.81             | 0.296                          | 937.42             | 277.72             |
| A_68_P28195051 | chr12:3427564-3427608                             | NM_172421:703      | Asx2          | INSIDE                 | 0.528                                                        | 0.694                          | 1675.94            | 1162.81            | 0.367                          | 1311.65            | 480.87             |
| A_68_P30378500 | chr15:81416070-81416114                           | NM_177821:-551     | Ep300         | PROMOTER               | 0.528                                                        | 0.676                          | 1310.47            | 885.42             | 0.357                          | 1049.19            | 374.23             |
| A_68_P28493246 | chr12:66067167-66067211                           | NM_177805:460      | Fam179b       | INSIDE                 | 0.528                                                        | 0.648                          | 1451.03            | 940.29             | 0.342                          | 1111.93            | 380.15             |
| A_68_P21339408 | chr2:74600811-74600855                            | NM_010467:-204     | Hoxd1         | PROMOTER               | 0.528                                                        | 0.558                          | 2033.10            | 1134.00            | 0.295                          | 1600.30            | 471.32             |
| A_68_P21010259 | chr2:12223211-12223256                            | NM_001001309:314   | Itga8         | INSIDE                 | 0.528                                                        | 0.686                          | 1837.42            | 1260.25            | 0.362                          | 1435.62            | 519.59             |
| A_68_P26082839 | chr8:97877231-97877275                            | NM_008609:1016     | Mmp15         | INSIDE                 | 0.528                                                        | 0.638                          | 884.76             | 564.61             | 0.337                          | 719.94             | 242.36             |
| A_68_P25501810 | chr7:133839074-133839118                          | NM_029420:201      | Slx1b         | INSIDE                 | 0.528                                                        | 0.651                          | 1914.41            | 1247.04            | 0.344                          | 1490.69            | 512.50             |
| A_68_P26504540 | chr9:50412429-50412473                            | NM_013897:445      | Timm8b        | INSIDE                 | 0.528                                                        | 0.635                          | 957.49             | 607.85             | 0.335                          | 808.13             | 270.70             |
| A_68_P27290791 | chr10:81063724-81063768                           | NM_053254:-101     | Tle6          | DIVERGENT_PROMOTER     | 0.528                                                        | 0.588                          | 1477.87            | 869.72             | 0.311                          | 1247.37            | 387.83             |
| A_68_P25184109 | chr7:72838329-72838373                            | NM_026795:48       | Tm2d3         | INSIDE                 | 0.528                                                        | 0.507                          | 2105.01            | 1066.45            | 0.268                          | 1576.93            | 421.87             |
| A_68_P25405561 | chr7:116154611-116154655                          | NM_021885:239      | Tub           | INSIDE                 | 0.528                                                        | 0.428                          | 1254.12            | 536.30             | 0.226                          | 1062.98            | 240.08             |
| A_68_P31157814 | chr17:35272332-35272376                           | NM_057171:168      | Bag6          | INSIDE                 | 0.527                                                        | 0.550                          | 1620.34            | 891.65             | 0.290                          | 1254.70            | 363.55             |
| A_68_P21040894 | chr2:18612064-18612108                            | NM_001001334:-8562 | BC061194      | PROMOTER               | 0.527                                                        | 0.636                          | 879.57             | 559.69             | 0.335                          | 756.60             | 253.70             |
| A_68_P21612763 | chr2:127161943-127161987                          | NM_010090:70       | Dusp2         | INSIDE                 | 0.527                                                        | 0.415                          | 1381.84            | 573.89             | 0.219                          | 1181.19            | 258.47             |
| A_68_P21113207 | chr2:31938899-31938943                            | NM_175511:305      | Fam78a        | INSIDE                 | 0.527                                                        | 0.442                          | 3151.64            | 1393.05            | 0.233                          | 2489.87            | 579.90             |
| A_68_P31254845 | chr17:56395400-56395444                           | NM_010192:-793     | Fem1a         | PROMOTER               | 0.527                                                        | 0.490                          | 1685.22            | 825.45             | 0.258                          | 1313.88            | 338.91             |
| A_68_P27950592 | chr11:79524502-79524546                           | NR_029579:-946     | Mir193        | PROMOTER               | 0.527                                                        | 0.481                          | 2598.95            | 1250.46            | 0.253                          | 1890.95            | 479.02             |
| A_68_P30137684 | chr15:36212197-36212241                           | NM_013923:684      | Rnf19a        | INSIDE                 | 0.527                                                        | 0.559                          | 1358.96            | 759.71             | 0.295                          | 1087.80            | 320.36             |
| A_68_P29288687 | chr13:10489925-10489970                           | NM_144838:78       | Sgtb          | INSIDE                 | 0.527                                                        | 0.658                          | 3487.76            | 2296.13            | 0.347                          | 2668.97            | 926.00             |
| A_68_P23072588 | chr4:84851180-84851224                            | NM_019535:-157     | Sh3gl2        | PROMOTER               | 0.527                                                        | 0.624                          | 863.04             | 538.62             | 0.329                          | 831.01             | 273.33             |
| A_68_P28744028 | chr12:112667836-112667880                         | NM_028807:12218    | 1200009106Rik | INSIDE                 | 0.526                                                        | 0.649                          | 1883.15            | 1222.35            | 0.341                          | 1429.66            | 488.04             |
| A_68_P20265717 | chr1:59820840-59820884                            | NM_007561:-618     | Bmpr2         | PROMOTER               | 0.526                                                        | 0.467                          | 1127.96            | 526.30             | 0.245                          | 983.90             | 241.53             |
| A_68_P28187625 | chr11:120794313-120794357                         | NM_027745:-148     | Ccdc57        | PROMOTER               | 0.526                                                        | 0.484                          | 1751.38            | 848.39             | 0.255                          | 1263.67            | 321.70             |
| A_68_P30508954 | chr16:4213021-4213065                             | NM_001025432:362   | Crebbp        | INSIDE                 | 0.526                                                        | 0.674                          | 2557.64            | 1725.06            | 0.355                          | 2017.28            | 715.64             |
| A_68_P23203773 | chr4:109655219-109655263                          | NM_172296:4611     | Dmrta2        | INSIDE                 | 0.526                                                        | 0.569                          | 1057.83            | 601.95             | 0.299                          | 879.38             | 263.17             |
| A_68_P23317815 | chr4:133036401-133036445                          | NM_175307:375      | Fam46b        | INSIDE                 | 0.526                                                        | 0.695                          | 1689.50            | 1174.35            | 0.366                          | 1246.47            | 455.87             |
| A_68_P27783947 | chr11:49447973-49448018                           | NM_008029:24815    | Flt4          | INSIDE                 | 0.526                                                        | 1.367                          | 3184.53            | 4353.73            | 0.719                          | 2326.58            | 1673.18            |
| A_68_P28614430 | chr12:88488238-88488282                           | NM_010363:-407     | Gstz1         | PROMOTER               | 0.526                                                        | 0.678                          | 1114.53            | 755.34             | 0.356                          | 977.63             | 348.19             |
| A_68_P20567331 | chr1:123424359-123424403                          | NM_010483:662      | Htr5b         | INSIDE                 | 0.526                                                        | 0.452                          | 1275.69            | 576.62             | 0.238                          | 1193.13            | 283.71             |
| A_68_P25044855 | chr7:35438249-35438293                            | NM_146188:-410     | Ketd15        | PROMOTER               | 0.526                                                        | 0.476                          | 1339.92            | 638.08             | 0.250                          | 1162.42            | 291.04             |
| A_68_P23006655 | chr4:70196033-70196077                            | NM_172694:-92      | Megf9         | PROMOTER               | 0.526                                                        | 0.513                          | 1080.16            | 554.51             | 0.270                          | 939.24             | 253.74             |
| A_68_P25261460 | chr7:86649666-86649710                            | NR_029818:-461     | Mir9-3        | PROMOTER               | 0.526                                                        | 0.659                          | 866.11             | 571.20             | 0.347                          | 708.77             | 245.94             |
| A_68_P25261269 | chr7:86610660-86610704                            | NM_017462:477      | Polg          | INSIDE                 | 0.526                                                        | 0.352                          | 2361.12            | 829.94             | 0.185                          | 1736.33            | 321.23             |
| A_68_P22350096 | chr3:96397949-96397993                            | NM_027241:111      | Polr3gl       | INSIDE                 | 0.526                                                        | 0.538                          | 2987.97            | 1608.27            | 0.283                          | 1981.79            | 561.16             |
| A_68_P24980582 | chr7:16858850-16858896                            | NM_001136270:169   | Prr24         | INSIDE                 | 0.526                                                        | 3.083                          | 7046.42            | 21723.01           | 1.620                          | 4740.82            | 7681.36            |
| A_68_P26044795 | chr8:91567813-91567857                            | NM_021390:227      | Sall1         | INSIDE                 | 0.526                                                        | 0.330                          | 1868.36            | 616.44             | 0.173                          | 1602.95            | 277.95             |
| A_68_P21900712 | chr2:179711703-179711747                          | NR_033782:167      | 4921531C22Rik | INSIDE                 | 0.525                                                        | 0.563                          | 1067.86            | 601.46             | 0.296                          | 855.19             | 253.06             |
| A_68_P20395062 | chr1:82836520-82836565                            | NM_010472:485      | Agfg1         | INSIDE                 | 0.525                                                        | 0.473                          | 2355.63            | 1115.29            | 0.248                          | 2053.78            | 510.21             |
| A_68_P32260255 | chrX:11655059-11655115                            | NM_029510:2593     | Bcor          | INSIDE                 | 0.525                                                        | 0.556                          | 1059.70            | 589.72             | 0.292                          | 446.82             | 130.49             |
| A_68_P21777898 | chr2:157391806-157391850                          | NM_016916:269      | Blep          | INSIDE                 | 0.525                                                        | 0.533                          | 1132.85            | 603.97             | 0.280                          | 971.06             | 271.87             |
| A_68_P23366008 | chr4:141349558-141349602                          | NM_015733:54       | Casp9         | INSIDE                 | 0.525                                                        | 3.292                          | 6717.58            | 22113.85           | 1.728                          | 4665.93            | 8061.83            |
| A_68_P28071818 | chr11:100943909-100943954                         | NM_027896:-7       | Coasy         | PROMOTER               | 0.525                                                        | 0.618                          | 1182.11            | 730.56             | 0.324                          | 784.20             | 254.46             |
| A_68_P22889573 | chr4:46614584-46614628                            | NM_001164804:195   | Coro2a        | INSIDE                 | 0.525                                                        | 0.541                          | 1659.55            | 897.98             | 0.284                          | 1346.16            | 382.59             |
| A_68_P31157715 | chr17:35258104-35258148                           | NM_009975:266      | Csnk2b        | INSIDE                 | 0.525                                                        | 0.671                          | 2018.35            | 1355.21            | 0.353                          | 1461.97            | 515.49             |
| A_68_P21570231 | chr2:119372809-119372853                          | NM_172857:533      | Exd1          | INSIDE                 | 0.525                                                        | 0.591                          | 1897.79            | 1122.21            | 0.310                          | 1620.11            | 502.83             |
| A_68_P23227295 | chr4:115690207-115690251                          | NM_010173:279      | Faah          | INSIDE                 | 0.525                                                        | 0.549                          | 2199.10            | 1207.29            | 0.288                          | 2005.15            | 577.49             |
| A_68_P29702362 | chr14:70999309-70999353                           | NM_194345:312      | Fam160b2      | INSIDE                 | 0.525                                                        | 0.359                          | 1598.94            | 574.24             | 0.188                          | 1237.15            | 233.10             |
| A_68_P27357060 | chr10:93499035-93499079                           | NM_053072:311      | Fgd6          | INSIDE                 | 0.525                                                        | 0.653                          | 1340.98            | 875.59             | 0.343                          | 1185.84            | 406.51             |



| ProbeName      | Target position of probe on CpG island microarray | TargetID               | GeneSymbol | CpG island Description | Ratio of relative methylation (TiO <sub>2</sub> -NP/Vehicle) | Sham group                     |                    |                    | TiO <sub>2</sub> -H group      |                    |                    |
|----------------|---------------------------------------------------|------------------------|------------|------------------------|--------------------------------------------------------------|--------------------------------|--------------------|--------------------|--------------------------------|--------------------|--------------------|
|                |                                                   |                        |            |                        |                                                              | Relative methylation (Cy5/Cy3) | Cy3 signal (Input) | Cy5 signal (MeDIP) | Relative methylation (Cy5/Cy3) | Cy3 signal (Input) | Cy5 signal (MeDIP) |
| A_68_P21812431 | chr2:16326431-163264355                           | NM_144891:130          | Gdap111    | INSIDE                 | 0.525                                                        | 0.540                          | 1278.39            | 690.65             | 0.283                          | 1056.04            | 299.37             |
| A_68_P22348232 | chr3:96025442-96025486                            | NM_178214:421          | Hist2h2be  | INSIDE                 | 0.525                                                        | 0.634                          | 1337.54            | 848.64             | 0.333                          | 1018.16            | 339.35             |
| A_68_P22190746 | chr3:63099501-63099545                            | NM_008604:-271         | Mme        | PROMOTER               | 0.525                                                        | 0.555                          | 3999.99            | 2220.29            | 0.292                          | 3196.57            | 931.94             |
| A_68_P23365306 | chr4:141219776-141219820                          | NM_001033150:232       | Plekhd2    | INSIDE                 | 0.525                                                        | 0.343                          | 1595.14            | 546.53             | 0.180                          | 1260.13            | 226.86             |
| A_68_P22350868 | chr3:96531418-96531462                            | NM_028925:-78          | Polr3c     | DIVERGENT_PROMOTER     | 0.525                                                        | 0.567                          | 1474.70            | 835.95             | 0.297                          | 1356.25            | 403.34             |
| A_68_P25090667 | chr7:52271089-52271133                            | NM_001008422:509       | Scaf1      | INSIDE                 | 0.525                                                        | 0.597                          | 935.41             | 558.13             | 0.313                          | 703.40             | 220.26             |
| A_68_P21623519 | chr2:129024601-129024645                          | NM_001159593:114       | Slc20a1    | INSIDE                 | 0.525                                                        | 0.599                          | 2687.80            | 1610.63            | 0.314                          | 1991.40            | 625.96             |
| A_68_P21330519 | chr2:73111290-73111334                            | NM_001005343:1330      | Sp9        | INSIDE                 | 0.525                                                        | 0.451                          | 1831.50            | 826.07             | 0.237                          | 1456.82            | 345.17             |
| A_68_P24097663 | chr5:131782424-131782475                          | NM_145218:943          | Wbscr17    | INSIDE                 | 0.525                                                        | 0.541                          | 947.64             | 512.44             | 0.284                          | 790.04             | 224.30             |
| A_68_P29662310 | chr14:64225813-64225857                           | NM_173393:468          | Xkr6       | INSIDE                 | 0.525                                                        | 0.541                          | 2910.96            | 1575.77            | 0.284                          | 2322.28            | 659.56             |
| A_68_P30386394 | chr15:82887167-82887211                           | AK139602:182019        |            | INSIDE                 | 0.525                                                        | 0.460                          | 1550.68            | 712.93             | 0.241                          | 1176.77            | 284.14             |
| A_68_P28833742 | chr13:12794705-12794749                           | ENSXMUST00000104944:98 |            | INSIDE                 | 0.525                                                        | 0.564                          | 1525.15            | 860.01             | 0.296                          | 1349.65            | 399.67             |
| A_68_P26595470 | chr9:66682593-66682637                            | NM_026674:-101         | Aph1c      | PROMOTER               | 0.524                                                        | 0.575                          | 3493.70            | 2008.35            | 0.301                          | 2816.28            | 848.41             |
| A_68_P23295723 | chr4:128916179-128916223                          | NM_001033189:9487      | C77080     | INSIDE                 | 0.524                                                        | 0.532                          | 3414.15            | 1816.75            | 0.279                          | 2652.26            | 739.66             |
| A_68_P20442008 | chr1:93262992-93263036                            | NM_173395:8            | Fam132b    | INSIDE                 | 0.524                                                        | 0.623                          | 3507.65            | 2185.83            | 0.326                          | 2714.21            | 885.50             |
| A_68_P24466585 | chr6:54942609-54942653                            | NM_026637:231          | Gget       | INSIDE                 | 0.524                                                        | 0.482                          | 1086.83            | 523.50             | 0.252                          | 916.67             | 231.24             |
| A_68_P30511777 | chr16:4726653-4726697                             | NM_001136066:314       | Hmox2      | INSIDE                 | 0.524                                                        | 0.514                          | 2757.78            | 1417.92            | 0.269                          | 2341.07            | 630.63             |
| A_68_P23600187 | chr5:35731282-35731326                            | NM_010445:-461         | Hmx1       | PROMOTER               | 0.524                                                        | 0.522                          | 1697.52            | 886.83             | 0.274                          | 1428.06            | 390.66             |
| A_68_P22698894 | chr4:4719763-4719807                              | NM_177730:669          | Impad1     | INSIDE                 | 0.524                                                        | 0.687                          | 1867.04            | 1283.49            | 0.360                          | 1425.36            | 513.73             |
| A_68_P24325222 | chr6:29162054-29162098                            | NM_011829:195          | Impdh1     | INSIDE                 | 0.524                                                        | 0.560                          | 2574.26            | 1441.17            | 0.293                          | 1716.21            | 503.33             |
| A_68_P20354542 | chr1:75501748-75501792                            | NM_178884:1257         | Obsl1      | INSIDE                 | 0.524                                                        | 0.390                          | 2008.01            | 782.44             | 0.204                          | 1542.57            | 314.94             |
| A_68_P30386866 | chr15:82979570-82979614                           | NM_178627:174          | Poldip3    | INSIDE                 | 0.524                                                        | 0.447                          | 1219.72            | 545.34             | 0.234                          | 986.78             | 231.29             |
| A_68_P31302581 | chr17:66121665-66121709                           | NM_133685:406          | Rab31      | INSIDE                 | 0.524                                                        | 0.714                          | 2274.34            | 1623.87            | 0.374                          | 1834.79            | 687.09             |
| A_68_P27283982 | chr10:80023920-80023964                           | NM_025852:363          | Rexo1      | INSIDE                 | 0.524                                                        | 0.385                          | 2003.75            | 771.99             | 0.202                          | 1626.95            | 328.65             |
| A_68_P23468799 | chr5:8623093-8623137                              | NM_198620:-162         | Runde3b    | PROMOTER               | 0.524                                                        | 0.551                          | 1394.30            | 768.90             | 0.289                          | 1118.35            | 323.01             |
| A_68_P31254208 | chr17:56288089-56288133                           | NM_001130456:-8344     | Sema6b     | PROMOTER               | 0.524                                                        | 2.602                          | 6117.85            | 15916.37           | 1.362                          | 4071.00            | 5545.04            |
| A_68_P26667556 | chr9:79915402-79915446                            | NM_146003:715          | Senp6      | INSIDE                 | 0.524                                                        | 0.580                          | 1184.12            | 686.23             | 0.303                          | 1003.97            | 304.68             |
| A_68_P21476827 | chr2:102241389-102241433                          | NM_020267:-353         | Trim44     | PROMOTER               | 0.524                                                        | 0.700                          | 1758.05            | 1230.21            | 0.366                          | 1369.47            | 501.80             |
| A_68_P29531321 | chr14:35487082-35487126                           | NM_001004436:-9        | Wapal      | PROMOTER               | 0.524                                                        | 0.495                          | 3713.31            | 1839.03            | 0.259                          | 3076.43            | 798.07             |
| A_68_P28818475 | chr13:9763163-9763207                             | NM_001199141:1376      | Zmynd11    | INSIDE                 | 0.524                                                        | 0.567                          | 1210.13            | 686.07             | 0.297                          | 1053.98            | 313.34             |
| A_68_P28743061 | chr12:112512577-112512621                         | NM_033603:3277         | Amn        | INSIDE                 | 0.523                                                        | 0.681                          | 3901.04            | 2654.67            | 0.356                          | 2858.10            | 1018.09            |
| A_68_P20377068 | chr1:79668401-79668445                            | NM_183027:125          | Ap1s3      | INSIDE                 | 0.523                                                        | 0.705                          | 2389.03            | 1683.13            | 0.369                          | 1803.25            | 665.03             |
| A_68_P26521203 | chr9:53344856-53344900                            | NM_007499:-102         | Atm        | DIVERGENT_PROMOTER     | 0.523                                                        | 0.480                          | 1954.94            | 938.10             | 0.251                          | 1532.71            | 384.40             |
| A_68_P27386037 | chr10:98726254-98726298                           | NM_026268:412          | Dusp6      | INSIDE                 | 0.523                                                        | 0.555                          | 1184.29            | 657.03             | 0.290                          | 1010.52            | 292.97             |
| A_68_P29161996 | chr13:78302959-78303003                           | NM_001163419:455030    | Fam172a    | INSIDE                 | 0.523                                                        | 0.708                          | 1326.64            | 938.85             | 0.370                          | 1070.86            | 396.19             |
| A_68_P31100623 | chr17:25097367-25097411                           | NM_198937:180          | Hn11       | INSIDE                 | 0.523                                                        | 0.461                          | 1873.12            | 863.53             | 0.241                          | 1688.36            | 406.87             |
| A_68_P31344183 | chr17:73457385-73457429                           | NM_001081071:82        | Lclat1     | INSIDE                 | 0.523                                                        | 0.321                          | 1799.39            | 577.36             | 0.168                          | 1490.87            | 250.21             |
| A_68_P29162323 | chr13:78342968-78343012                           | NM_010151:-4747        | Nr2f1      | PROMOTER               | 0.523                                                        | 0.627                          | 1214.20            | 761.07             | 0.328                          | 1068.19            | 350.34             |
| A_68_P30423566 | chr15:88991488-88991534                           | NM_001159521:12770     | Plxnb2     | INSIDE                 | 0.523                                                        | 3.344                          | 930.56             | 3111.62            | 1.748                          | 714.34             | 1248.70            |
| A_68_P24980575 | chr7:16858057-16858101                            | NM_001136270:963       | Pr24       | INSIDE                 | 0.523                                                        | 0.678                          | 1582.48            | 1072.73            | 0.354                          | 1159.31            | 410.80             |
| A_68_P22659976 | chr3:153636770-153636814                          | NM_001081263:393       | Slc44a5    | INSIDE                 | 0.523                                                        | 0.537                          | 1862.95            | 1001.08            | 0.281                          | 1449.80            | 407.80             |
| A_68_P30659698 | chr16:33251336-33251380                           | NM_080557:-183         | Snx4       | PROMOTER               | 0.523                                                        | 0.611                          | 1409.78            | 860.70             | 0.320                          | 1120.48            | 358.00             |
| A_68_P23916493 | chr5:98596245-98596289                            |                        |            | Unknown                | 0.523                                                        | 0.637                          | 1222.64            | 779.36             | 0.333                          | 1036.38            | 345.34             |
| A_68_P21741660 | chr2:150730004-150730048                          | NM_024465:441          | Abhd12     | INSIDE                 | 0.522                                                        | 0.663                          | 3093.69            | 2050.35            | 0.346                          | 2373.54            | 821.67             |
| A_68_P25700848 | chr8:18846199-18846243                            | NM_026792:-58          | Agpat5     | PROMOTER               | 0.522                                                        | 0.509                          | 1102.65            | 561.01             | 0.265                          | 892.11             | 236.84             |
| A_68_P31933382 | chr19:6241388-6241441                             | NM_194348:-253         | Atg2a      | DIVERGENT_PROMOTER     | 0.522                                                        | 0.641                          | 1685.53            | 1081.01            | 0.335                          | 1362.54            | 456.31             |
| A_68_P28924024 | chr13:31712368-31712412                           | NM_010225:-5294        | Foxf2      | PROMOTER               | 0.522                                                        | 0.634                          | 1177.27            | 746.26             | 0.331                          | 925.39             | 306.28             |
| A_68_P23250459 | chr4:119960018-119960062                          | NM_194060:-174         | Foxo6      | PROMOTER               | 0.522                                                        | 0.507                          | 6242.18            | 3163.84            | 0.264                          | 4501.15            | 1190.08            |
| A_68_P22791944 | chr4:25726907-25726951                            | NM_010243:222          | Fut9       | INSIDE                 | 0.522                                                        | 0.746                          | 3942.61            | 2941.31            | 0.389                          | 3012.64            | 1172.89            |
| A_68_P28158433 | chr11:116142782-116142826                         | NM_010254:552          | Galr2      | INSIDE                 | 0.522                                                        | 0.699                          | 1461.04            | 1020.97            | 0.365                          | 1225.86            | 447.11             |
| A_68_P31731707 | chr18:56868451-56868495                           | NM_010721:1006         | Lmnb1      | INSIDE                 | 0.522                                                        | 0.653                          | 1130.13            | 737.47             | 0.340                          | 888.28             | 302.36             |

| ProbeName      | Target position of probe on CpG island microarray | TargetID            | GeneSymbol    | CpG island Description | Ratio of relative methylation (TiO <sub>2</sub> -NP/Vehicle) | Sham group                     |                    |                    | TiO <sub>2</sub> -H group      |                    |                    |
|----------------|---------------------------------------------------|---------------------|---------------|------------------------|--------------------------------------------------------------|--------------------------------|--------------------|--------------------|--------------------------------|--------------------|--------------------|
|                |                                                   |                     |               |                        |                                                              | Relative methylation (Cy5/Cy3) | Cy3 signal (Input) | Cy5 signal (MeDIP) | Relative methylation (Cy5/Cy3) | Cy3 signal (Input) | Cy5 signal (MeDIP) |
| A_68_P21099810 | chr2:29702001-29702045                            | NR_029838:-775      | Mir219-2      | PROMOTER               | 0.522                                                        | 0.532                          | 1726.86            | 918.25             | 0.277                          | 1250.61            | 346.80             |
| A_68_P32132944 | chr19:44629890-44629934                           | NM_026061:-7        | Ndufb8        | DIVERGENT_PROMOTER     | 0.522                                                        | 0.648                          | 876.50             | 568.25             | 0.338                          | 721.40             | 244.16             |
| A_68_P31207972 | chr17:46766049-46766093                           | NM_175168:383       | Ptk7          | INSIDE                 | 0.522                                                        | 0.489                          | 3103.20            | 1518.78            | 0.255                          | 2376.47            | 606.87             |
| A_68_P26630975 | chr9:72892792-72892836                            | NM_023635:143       | Rab27a        | INSIDE                 | 0.522                                                        | 0.587                          | 2110.75            | 1239.23            | 0.307                          | 1765.63            | 541.52             |
| A_68_P28172264 | chr11:118430533-118430577                         | NM_001024931:340332 | Rbfox3        | INSIDE                 | 0.522                                                        | 0.513                          | 1315.00            | 674.32             | 0.268                          | 984.46             | 263.47             |
| A_68_P22392368 | chr3:104442587-104442631                          | NM_009196:18        | Slc16a1       | INSIDE                 | 0.522                                                        | 0.566                          | 1703.49            | 964.24             | 0.296                          | 1295.31            | 382.87             |
| A_68_P31247136 | chr17:54437767-54437811                           | NM_022025:571       | Slc5a7        | INSIDE                 | 0.522                                                        | 0.671                          | 1318.86            | 885.17             | 0.351                          | 1023.01            | 358.71             |
| A_68_P28778756 | chr12:119539812-119539856                         | NM_001166385:79     | Sp4           | INSIDE                 | 0.522                                                        | 0.452                          | 1511.26            | 683.41             | 0.236                          | 1125.00            | 265.51             |
| A_68_P20596472 | chr1:129574599-129574643                          | NM_028135:-22       | Tmem163       | PROMOTER               | 0.522                                                        | 0.693                          | 1917.07            | 1328.71            | 0.362                          | 1445.26            | 522.72             |
| A_68_P20349750 | chr1:74708445-74708489                            | NM_001014974:139    | Till4         | INSIDE                 | 0.522                                                        | 0.412                          | 2042.66            | 842.41             | 0.215                          | 1604.77            | 345.34             |
| A_68_P26345603 | chr9:20935690-20935734                            | NM_001205312:7      | Tyk2          | INSIDE                 | 0.522                                                        | 0.447                          | 1299.32            | 581.22             | 0.234                          | 950.51             | 222.05             |
| A_68_P20599491 | chr1:130140934-130140978                          | NM_026390:199       | Ubxn4         | INSIDE                 | 0.522                                                        | 0.677                          | 2087.79            | 1413.90            | 0.353                          | 1703.00            | 601.59             |
| A_68_P21617369 | chr2:127952159-127952203                          | NM_009754:407       | Bel2l11       | INSIDE                 | 0.521                                                        | 0.528                          | 2129.39            | 1124.93            | 0.275                          | 1695.44            | 466.84             |
| A_68_P27684135 | chr11:31572000-31572044                           | NM_001024919:-160   | Bod1          | PROMOTER               | 0.521                                                        | 0.500                          | 1403.15            | 701.95             | 0.261                          | 1110.76            | 289.66             |
| A_68_P23470689 | chr5:8997395-8997439                              | NM_023733:-270      | Crot          | PROMOTER               | 0.521                                                        | 0.541                          | 1008.41            | 545.45             | 0.282                          | 794.17             | 223.71             |
| A_68_P22324269 | chr3:90068935-90068979                            | NM_201407:-1499     | Dennd4b       | PROMOTER               | 0.521                                                        | 0.551                          | 995.76             | 548.92             | 0.287                          | 937.25             | 269.07             |
| A_68_P33003690 | chr1_random:342987-343031                         | NM_177389:-95       | Mia3          | PROMOTER               | 0.521                                                        | 0.536                          | 3386.71            | 1814.67            | 0.279                          | 2521.96            | 703.67             |
| A_68_P28457818 | chr12:57714241-57714285                           | NM_008701:9         | Nkx2-9        | INSIDE                 | 0.521                                                        | 0.542                          | 1256.19            | 680.95             | 0.283                          | 992.38             | 280.45             |
| A_68_P24984095 | chr7:17530028-17530072                            | NM_001099636:20     | Pnmal2        | INSIDE                 | 0.521                                                        | 0.651                          | 1539.60            | 1001.72            | 0.339                          | 1231.81            | 417.29             |
| A_68_P21784240 | chr2:158492976-158493020                          | NM_001159662:128    | Ppp1r16b      | INSIDE                 | 0.521                                                        | 0.498                          | 1902.05            | 946.70             | 0.259                          | 1560.31            | 404.36             |
| A_68_P28035861 | chr11:94840510-94840554                           | NM_009161:-2891     | Sgca          | PROMOTER               | 0.521                                                        | 0.655                          | 892.65             | 584.79             | 0.341                          | 755.20             | 257.88             |
| A_68_P31836526 | chr18:75526561-75526605                           | NM_001042660:-436   | Smad7         | PROMOTER               | 0.521                                                        | 0.462                          | 2780.33            | 1284.39            | 0.241                          | 2151.86            | 517.83             |
| A_68_P24328151 | chr6:29686313-29686357                            | NM_176996:838       | Smo           | INSIDE                 | 0.521                                                        | 0.490                          | 1382.36            | 677.01             | 0.255                          | 1119.40            | 285.82             |
| A_68_P25034254 | chr7:31741889-31741933                            | NM_011680:-88       | Usf2          | PROMOTER               | 0.521                                                        | 0.456                          | 1801.66            | 821.91             | 0.238                          | 1564.91            | 372.27             |
| A_68_P23440547 | chr4:155148630-155148674                          | NM_147776:18        | Vwa1          | INSIDE                 | 0.521                                                        | 0.662                          | 2450.19            | 1622.79            | 0.345                          | 1828.98            | 630.97             |
| A_68_P28931377 | chr13:32893930-32893974                           | NM_030215:54        | Wrip1         | INSIDE                 | 0.521                                                        | 0.400                          | 1803.71            | 721.31             | 0.208                          | 1417.83            | 295.59             |
| A_68_P27279427 | chr10:79337379-79337423                           | NM_001170935:-21    | BC005764      | DIVERGENT_PROMOTER     | 0.520                                                        | 0.697                          | 3505.25            | 2441.76            | 0.362                          | 2603.48            | 942.18             |
| A_68_P30371303 | chr15:80118250-80118294                           | NM_001044308:605    | Caena1i       | INSIDE                 | 0.520                                                        | 0.557                          | 1719.51            | 957.94             | 0.290                          | 1356.02            | 392.85             |
| A_68_P31374516 | chr17:79336106-79336150                           | NM_001024806:282    | Cebpz         | INSIDE                 | 0.520                                                        | 0.672                          | 1013.10            | 681.20             | 0.350                          | 885.58             | 309.93             |
| A_68_P23792212 | chr5:72895290-72895334                            | NM_016869:135       | Corin         | INSIDE                 | 0.520                                                        | 0.496                          | 1492.72            | 739.71             | 0.258                          | 1165.66            | 300.32             |
| A_68_P20600403 | chr1:130313627-130313671                          | NM_177445:345       | Dars          | INSIDE                 | 0.520                                                        | 0.421                          | 1579.20            | 664.11             | 0.219                          | 1326.39            | 289.93             |
| A_68_P25009058 | chr7:26004203-26004247                            | NM_207677:654       | Dedd2         | INSIDE                 | 0.520                                                        | 0.672                          | 3997.66            | 2685.31            | 0.349                          | 2861.04            | 998.56             |
| A_68_P30963516 | chr16:91547641-91547685                           | NM_008338:324       | Ifngr2        | INSIDE                 | 0.520                                                        | 0.638                          | 1030.78            | 658.13             | 0.332                          | 884.86             | 293.86             |
| A_68_P27533648 | chr10:126479103-126479147                         | NM_010792:137       | Mettl1        | INSIDE                 | 0.520                                                        | 0.627                          | 2175.66            | 1364.15            | 0.326                          | 1711.38            | 558.10             |
| A_68_P31151560 | chr17:34162324-34162368                           | NR_029800:-309      | Mir219-1      | PROMOTER               | 0.520                                                        | 0.563                          | 2440.44            | 1374.98            | 0.293                          | 1678.09            | 491.25             |
| A_68_P29589360 | chr14:49282109-49282153                           | NM_144841:417       | Otx2          | INSIDE                 | 0.520                                                        | 0.524                          | 1009.66            | 528.59             | 0.272                          | 850.24             | 231.39             |
| A_68_P28107252 | chr11:107331040-107331084                         | NM_145823:972       | Pitpnc1       | INSIDE                 | 0.520                                                        | 0.607                          | 2393.36            | 1453.50            | 0.316                          | 1967.44            | 621.57             |
| A_68_P22518620 | chr3:128902934-128902978                          | NM_001042504:115    | Pitx2         | INSIDE                 | 0.520                                                        | 0.691                          | 2387.47            | 1650.08            | 0.359                          | 1963.44            | 705.65             |
| A_68_P23417945 | chr4:151687256-151687300                          | NM_001033489:5456   | Rnf207        | INSIDE                 | 0.520                                                        | 0.527                          | 1833.26            | 965.97             | 0.274                          | 1332.43            | 365.40             |
| A_68_P31930772 | chr19:5770953-5770997                             | NM_023912:427       | Seyl1         | INSIDE                 | 0.520                                                        | 0.655                          | 1920.96            | 1257.37            | 0.340                          | 1369.97            | 466.12             |
| A_68_P30979311 | chr16:94084490-94084534                           | NM_011377:-992      | Sim2          | PROMOTER               | 0.520                                                        | 0.552                          | 1013.62            | 559.29             | 0.287                          | 862.01             | 247.44             |
| A_68_P30001154 | chr15:8586390-8586434                             | NM_148938:74395     | Slc1a3        | INSIDE                 | 0.520                                                        | 4.194                          | 624.39             | 2618.46            | 2.182                          | 622.94             | 1359.41            |
| A_68_P27162285 | chr10:57514583-57514627                           | NM_020561:255       | Smpd3a        | INSIDE                 | 0.520                                                        | 0.534                          | 1247.20            | 665.50             | 0.277                          | 986.73             | 273.53             |
| A_68_P29477470 | chr14:26276881-26276925                           | NM_183208:-1768     | Zmiz1         | PROMOTER               | 0.520                                                        | 0.358                          | 1595.70            | 571.13             | 0.186                          | 1111.08            | 206.81             |
| A_68_P23291908 | chr4:128262900-128262944                          | NM_177758:24420     | Zscan20       | INSIDE                 | 0.520                                                        | 3.081                          | 1828.81            | 5635.01            | 1.601                          | 1362.16            | 2181.09            |
| A_68_P31161374 | chr17:36002854-36002898                           | NM_001146710:-196   | 2310014H01Rik | PROMOTER               | 0.519                                                        | 0.538                          | 1848.47            | 994.37             | 0.279                          | 1230.22            | 343.55             |
| A_68_P26822982 | chr9:110207662-110207706                          | NM_001081381:-11    | 2610002117Rik | PROMOTER               | 0.519                                                        | 0.491                          | 1155.40            | 567.39             | 0.255                          | 918.98             | 234.03             |
| A_68_P26749722 | chr9:96790253-96790298                            | NM_153420:-434      | Acp12         | PROMOTER               | 0.519                                                        | 0.510                          | 1346.84            | 687.13             | 0.265                          | 990.00             | 261.93             |
| A_68_P22202887 | chr3:65762326-65762370                            | NM_019937:-201      | Cen1l         | PROMOTER               | 0.519                                                        | 0.591                          | 1278.90            | 756.02             | 0.307                          | 1053.73            | 323.14             |
| A_68_P31567781 | chr18:25913080-25913124                           | NM_001146292:-618   | Celf4         | PROMOTER               | 0.519                                                        | 0.678                          | 1334.73            | 904.99             | 0.352                          | 1199.85            | 422.05             |
| A_68_P31065305 | chr17:15517994-15518045                           | NM_007865:-5232     | Dll1          | PROMOTER               | 0.519                                                        | 0.519                          | 1623.07            | 842.03             | 0.269                          | 1325.33            | 356.95             |

| ProbeName      | Target position of probe on CpG island microarray | TargetID                 | GeneSymbol    | CpG island Description | Ratio of relative methylation (TiO <sub>2</sub> -NP/Vehicle) | Sham group                     |                    |                    | TiO <sub>2</sub> -H group      |                    |                    |
|----------------|---------------------------------------------------|--------------------------|---------------|------------------------|--------------------------------------------------------------|--------------------------------|--------------------|--------------------|--------------------------------|--------------------|--------------------|
|                |                                                   |                          |               |                        |                                                              | Relative methylation (Cy5/Cy3) | Cy3 signal (Input) | Cy5 signal (MeDIP) | Relative methylation (Cy5/Cy3) | Cy3 signal (Input) | Cy5 signal (MeDIP) |
| A_68_P23363642 | chr4:140924465-140924509                          | NM_001085513:352         | Fam131c       | INSIDE                 | 0.519                                                        | 0.558                          | 2287.61            | 1275.69            | 0.289                          | 1791.64            | 518.35             |
| A_68_P23973156 | chr5:109058413-109058457                          | NM_153569:324            | Gak           | INSIDE                 | 0.519                                                        | 0.606                          | 4363.22            | 2646.10            | 0.315                          | 3148.67            | 991.30             |
| A_68_P23591962 | chr5:34325727-34325771                            | NM_001033458:-374        | Gm1673        | PROMOTER               | 0.519                                                        | 0.579                          | 1267.64            | 734.52             | 0.301                          | 1019.87            | 306.96             |
| A_68_P29048047 | chr13:54287555-54287599                           | NM_008286:79             | Hrh2          | INSIDE                 | 0.519                                                        | 0.549                          | 1330.37            | 730.23             | 0.285                          | 1098.78            | 313.18             |
| A_68_P20240337 | chr1:55144375-55144419                            | NM_010477:380            | Hspd1         | INSIDE                 | 0.519                                                        | 0.594                          | 2443.80            | 1450.86            | 0.308                          | 2004.29            | 617.99             |
| A_68_P23298314 | chr4:129418594-129418638                          | NM_011317:910            | Khdrbs1       | INSIDE                 | 0.519                                                        | 0.525                          | 1377.45            | 723.44             | 0.273                          | 1242.32            | 338.57             |
| A_68_P20905055 | chr1:187941024-187941068                          | NM_146106:143            | Lyp1a1        | INSIDE                 | 0.519                                                        | 0.471                          | 2071.17            | 974.55             | 0.244                          | 1586.16            | 387.40             |
| A_68_P21345533 | chr2:75542035-75542079                            | NM_010902:642            | Nfe2l2        | INSIDE                 | 0.519                                                        | 0.523                          | 1396.72            | 730.30             | 0.271                          | 1119.48            | 303.92             |
| A_68_P27804893 | chr1:53276844-53276888                            | NM_027917:6160           | Shroom1       | INSIDE                 | 0.519                                                        | 0.595                          | 906.20             | 539.18             | 0.309                          | 811.85             | 250.84             |
| A_68_P20962671 | chr2:3392446-3392492                              | NM_022724:-210           | Suv39h2       | PROMOTER               | 0.519                                                        | 0.521                          | 984.43             | 513.13             | 0.270                          | 782.82             | 211.70             |
| A_68_P28099381 | chr1:105927583-105927627                          | NM_027346:184            | Taco1         | INSIDE                 | 0.519                                                        | 0.617                          | 2035.81            | 1255.81            | 0.320                          | 1585.00            | 507.13             |
| A_68_P23254146 | chr4:120624021-120624065                          | NM_001005788:264         | Zfp69         | INSIDE                 | 0.519                                                        | 0.454                          | 1515.26            | 688.54             | 0.236                          | 1260.87            | 297.48             |
| A_68_P23331982 | chr4:135638026-135638070                          | ENSMUST00000121307:-7161 |               | PROMOTER               | 0.519                                                        | 0.644                          | 1097.24            | 707.11             | 0.334                          | 951.27             | 318.09             |
| A_68_P22885561 | chr4:45896280-45896324                            | NM_028788:34484          | 1300002K09Rik | INSIDE                 | 0.518                                                        | 3.420                          | 921.96             | 3153.51            | 1.773                          | 691.69             | 1226.57            |
| A_68_P29746359 | chr14:78936378-78936422                           | NM_001164503:267         | Akap11        | INSIDE                 | 0.518                                                        | 0.603                          | 1770.61            | 1066.91            | 0.312                          | 1508.62            | 471.03             |
| A_68_P25954403 | chr8:73362971-73363015                            | NM_027560:627            | Ardec2        | INSIDE                 | 0.518                                                        | 0.524                          | 1499.61            | 785.72             | 0.272                          | 1276.75            | 346.77             |
| A_68_P28115682 | chr11:108781991-108782035                         | NM_015732:350            | Axin2         | INSIDE                 | 0.518                                                        | 0.453                          | 2557.17            | 1159.25            | 0.235                          | 2215.46            | 520.00             |
| A_68_P24157330 | chr5:144383580-144383624                          | NM_011182:287            | Cyth3         | INSIDE                 | 0.518                                                        | 0.607                          | 2619.29            | 1588.92            | 0.314                          | 2100.62            | 659.94             |
| A_68_P20827300 | chr1:173259326-173259370                          | NM_001128609:73          | Dedd          | INSIDE                 | 0.518                                                        | 0.364                          | 1930.26            | 703.37             | 0.189                          | 1665.09            | 314.02             |
| A_68_P32219658 | chr19:59543743-59543787                           | NM_010132:10585          | Emx2          | DOWNSTREAM             | 0.518                                                        | 0.571                          | 989.70             | 564.72             | 0.295                          | 803.68             | 237.39             |
| A_68_P28771929 | chr12:118392739-118392783                         | NR_033538:-3018          | Gm10421       | PROMOTER               | 0.518                                                        | 0.513                          | 1032.45            | 529.89             | 0.266                          | 691.08             | 183.88             |
| A_68_P24126242 | chr5:137972085-137972129                          | NM_010312:2351           | Gnb2          | INSIDE                 | 0.518                                                        | 0.587                          | 1855.41            | 1088.88            | 0.304                          | 1489.16            | 453.02             |
| A_68_P26213861 | chr8:121868279-121868323                          | NM_024219:-137           | Hsbp1         | PROMOTER               | 0.518                                                        | 0.441                          | 1227.41            | 541.85             | 0.229                          | 953.94             | 218.26             |
| A_68_P26022686 | chr8:87447681-87447725                            | NM_019945:13550          | Mast1         | INSIDE                 | 0.518                                                        | 2.821                          | 2382.49            | 6719.96            | 1.461                          | 1713.15            | 2503.61            |
| A_68_P28037998 | chr11:95171463-95171507                           | NM_001195003:76          | Myst2         | INSIDE                 | 0.518                                                        | 0.604                          | 1913.35            | 1155.83            | 0.313                          | 1555.98            | 487.26             |
| A_68_P26075129 | chr8:96561318-96561362                            | NM_001093757:243         | Ogfod1        | INSIDE                 | 0.518                                                        | 0.721                          | 2131.22            | 1536.21            | 0.373                          | 1534.30            | 572.41             |
| A_68_P32957129 | chr7:8534343-8534387                              | NM_178774:761            | Prr18         | INSIDE                 | 0.518                                                        | 0.626                          | 1114.38            | 697.44             | 0.324                          | 1032.46            | 334.91             |
| A_68_P21629881 | chr2:130276040-130276084                          | NM_001163688:49          | Ptpna         | INSIDE                 | 0.518                                                        | 0.626                          | 5416.56            | 3392.06            | 0.324                          | 3935.00            | 1275.44            |
| A_68_P31311916 | chr17:67703103-67703147                           | NM_008984:675            | Ptpnm         | INSIDE                 | 0.518                                                        | 0.531                          | 1401.92            | 744.02             | 0.275                          | 1148.81            | 315.56             |
| A_68_P26628115 | chr9:72339784-72339828                            | NM_009359:-43            | Tex9          | PROMOTER               | 0.518                                                        | 0.579                          | 922.11             | 534.25             | 0.300                          | 796.02             | 239.04             |
| A_68_P27942254 | chr11:78075324-78075368                           | NM_001002004:91          | 2610507B11Rik | INSIDE                 | 0.517                                                        | 0.572                          | 1212.73            | 693.61             | 0.296                          | 959.54             | 283.96             |
| A_68_P22775538 | chr4:21858442-21858486                            | NM_175234:-8             | 6230409E13Rik | PROMOTER               | 0.517                                                        | 0.568                          | 1159.15            | 658.86             | 0.294                          | 1039.90            | 305.84             |
| A_68_P21564754 | chr2:118375138-118375182                          | NM_138313:254            | Bmf           | INSIDE                 | 0.517                                                        | 0.639                          | 7210.45            | 4606.30            | 0.330                          | 5323.14            | 1756.68            |
| A_68_P26816838 | chr9:108728469-108728513                          | NM_080437:-160           | Celsr3        | PROMOTER               | 0.517                                                        | 0.409                          | 3585.13            | 1465.05            | 0.211                          | 2717.36            | 574.18             |
| A_68_P20293011 | chr1:64579120-64579164                            | NM_001037726:-235        | Creb1         | PROMOTER               | 0.517                                                        | 0.564                          | 3850.61            | 2170.53            | 0.291                          | 2688.19            | 783.60             |
| A_68_P25025638 | chr7:29940590-29940634                            | NM_001146023:617         | Fam98c        | INSIDE                 | 0.517                                                        | 0.684                          | 3093.74            | 2114.94            | 0.353                          | 2326.73            | 822.15             |
| A_68_P27973894 | chr11:83664886-83664930                           | NM_009330:538            | Hnfb          | INSIDE                 | 0.517                                                        | 0.656                          | 2460.11            | 1613.38            | 0.339                          | 1948.79            | 660.51             |
| A_68_P25596369 | chr7:149846534-149846578                          | NM_001122736:384         | Igf2          | INSIDE                 | 0.517                                                        | 0.596                          | 1727.31            | 1029.74            | 0.308                          | 1472.01            | 453.38             |
| A_68_P20947552 | chr1:194979319-194979363                          | NM_016851:35             | Irf6          | INSIDE                 | 0.517                                                        | 0.616                          | 967.79             | 596.45             | 0.319                          | 873.62             | 278.55             |
| A_68_P25599905 | chr7:150482316-150482360                          | NR_001461:114            | Kenq1ot1      | INSIDE                 | 0.517                                                        | 1.366                          | 7091.04            | 9685.35            | 0.707                          | 4961.85            | 3505.79            |
| A_68_P32119292 | chr19:42222487-42222531                           | NM_183195:630            | Marveld1      | INSIDE                 | 0.517                                                        | 0.737                          | 5617.74            | 4142.62            | 0.381                          | 4129.04            | 1574.01            |
| A_68_P30557335 | chr16:13448659-13448703                           | NR_030549:-935           | Mir193b       | PROMOTER               | 0.517                                                        | 0.585                          | 3380.12            | 1976.05            | 0.302                          | 2588.96            | 782.22             |
| A_68_P26522115 | chr9:53513955-53513999                            | NM_175562:361            | Rab39         | INSIDE                 | 0.517                                                        | 0.736                          | 2541.23            | 1870.45            | 0.380                          | 2054.21            | 781.16             |
| A_68_P28531916 | chr12:73509185-73509229                           | NM_153457:720            | Rtn1          | INSIDE                 | 0.517                                                        | 0.679                          | 1209.17            | 820.57             | 0.351                          | 909.19             | 319.29             |
| A_68_P27896512 | chr11:69494853-69494903                           | NM_030702:594            | Senp3         | INSIDE                 | 0.517                                                        | 0.570                          | 1478.72            | 843.10             | 0.295                          | 1087.25            | 320.45             |
| A_68_P27091227 | chr10:41530014-41530058                           | NM_001162908:-343        | Sesn1         | DIVERGENT_PROMOTER     | 0.517                                                        | 0.586                          | 1123.65            | 658.05             | 0.303                          | 858.74             | 260.18             |
| A_68_P26706484 | chr9:87634686-87634730                            | NM_023814:-8613          | Tbx18         | PROMOTER               | 0.517                                                        | 0.338                          | 1611.29            | 544.04             | 0.175                          | 1292.66            | 225.65             |
| A_68_P27332827 | chr10:89208343-89208387                           | NM_029166:629            | Uhrf1bp11     | INSIDE                 | 0.517                                                        | 0.602                          | 2053.76            | 1236.54            | 0.311                          | 1498.78            | 466.31             |
| A_68_P24818153 | chr6:124958879-124958923                          | NM_175557:-922           | Zfp384        | PROMOTER               | 0.517                                                        | 0.505                          | 1347.18            | 679.78             | 0.261                          | 1055.62            | 275.37             |
| A_68_P26038371 | chr8:90485107-90485151                            | NM_033327:-1634          | Zfp423        | PROMOTER               | 0.517                                                        | 0.517                          | 1355.59            | 700.29             | 0.267                          | 1180.36            | 315.23             |
| A_68_P21041406 | chr2:18689012-18689056                            | ENSMUST00000119424:8424  |               | DOWNSTREAM             | 0.517                                                        | 0.612                          | 2252.81            | 1378.47            | 0.316                          | 1719.65            | 544.06             |

| ProbeName      | Target position of probe on CpG island microarray | TargetID                | GeneSymbol    | CpG island Description | Ratio of relative methylation (TiO <sub>2</sub> -NP/Vehicle) | Sham group                     |                    |                    | TiO <sub>2</sub> -H group      |                    |                    |
|----------------|---------------------------------------------------|-------------------------|---------------|------------------------|--------------------------------------------------------------|--------------------------------|--------------------|--------------------|--------------------------------|--------------------|--------------------|
|                |                                                   |                         |               |                        |                                                              | Relative methylation (Cy5/Cy3) | Cy3 signal (Input) | Cy5 signal (MeDIP) | Relative methylation (Cy5/Cy3) | Cy3 signal (Input) | Cy5 signal (MeDIP) |
| A_68_P23547918 | chr5:25035180-25035225                            | NR_027388:-633          | 1700096K18Rik | PROMOTER               | 0.516                                                        | 0.509                          | 1014.77            | 516.90             | 0.263                          | 909.77             | 239.35             |
| A_68_P30725228 | chr16:45159441-45159485                           | NM_026402:521           | Atg3          | INSIDE                 | 0.516                                                        | 0.405                          | 1313.07            | 532.40             | 0.209                          | 1403.01            | 293.47             |
| A_68_P22202886 | chr3:65762239-65762283                            | NM_019937:-113          | Cen1l         | PROMOTER               | 0.516                                                        | 0.713                          | 1822.10            | 1298.53            | 0.368                          | 1502.71            | 552.31             |
| A_68_P27101048 | chr10:43299118-43299162                           | NM_009846:166           | Cd24a         | INSIDE                 | 0.516                                                        | 0.599                          | 2997.47            | 1794.56            | 0.309                          | 2305.45            | 711.81             |
| A_68_P22520449 | chr3:129236571-129236615                          | NM_130450:1289          | Elov16        | INSIDE                 | 0.516                                                        | 0.523                          | 1307.01            | 683.74             | 0.270                          | 1073.46            | 289.89             |
| A_68_P21768928 | chr2:155834064-155834108                          | NM_025516:226           | Ergic3        | INSIDE                 | 0.516                                                        | 0.475                          | 2318.92            | 1100.41            | 0.245                          | 1700.86            | 416.77             |
| A_68_P25596372 | chr7:149846899-149846943                          | NM_001122736:20         | Igf2          | INSIDE                 | 0.516                                                        | 0.713                          | 1993.94            | 1421.96            | 0.368                          | 1828.72            | 673.07             |
| A_68_P31613845 | chr18:34784223-34784267                           | NM_001166407:-33        | Kif20a        | PROMOTER               | 0.516                                                        | 0.651                          | 951.51             | 619.24             | 0.336                          | 714.48             | 239.96             |
| A_68_P23088447 | chr4:87678387-87678431                            | NM_027326:903           | Mllt3         | INSIDE                 | 0.516                                                        | 0.708                          | 2138.29            | 1514.01            | 0.365                          | 1765.23            | 645.04             |
| A_68_P29982188 | chr15:5093945-5093989                             | NM_001013367:106        | Prkaa1        | INSIDE                 | 0.516                                                        | 0.276                          | 2168.50            | 598.03             | 0.142                          | 1691.22            | 240.81             |
| A_68_P24061766 | chr5:124981229-124981273                          | NM_021430:150           | Rilpl1        | INSIDE                 | 0.516                                                        | 0.406                          | 1536.95            | 624.37             | 0.210                          | 1115.47            | 233.86             |
| A_68_P30970267 | chr16:92606200-92606244                           | NM_001111023:91351      | Runx1         | INSIDE                 | 0.516                                                        | 1.408                          | 3130.00            | 4407.72            | 0.726                          | 2354.96            | 1709.68            |
| A_68_P26700014 | chr9:86465671-86465715                            | NM_001145968:33         | Rwdd2a        | INSIDE                 | 0.516                                                        | 0.585                          | 4142.67            | 2424.58            | 0.302                          | 3140.75            | 949.10             |
| A_68_P21621499 | chr2:128643821-128643865                          | NM_028248:-196          | Tmem87b       | PROMOTER               | 0.516                                                        | 0.683                          | 1950.87            | 1332.09            | 0.352                          | 1528.32            | 538.48             |
| A_68_P30125732 | chr15:33617536-33617580                           | NM_001085421:80         | Tspyl5        | INSIDE                 | 0.516                                                        | 0.643                          | 818.41             | 525.87             | 0.331                          | 724.43             | 240.09             |
| A_68_P31403203 | chr17:84587080-84587124                           | NM_001001806:185        | Zfp36l2       | INSIDE                 | 0.516                                                        | 0.305                          | 2182.82            | 664.69             | 0.157                          | 1708.21            | 268.44             |
| A_68_P28725238 | chr12:109244329-109244373                         | NM_001079883:-2726      | Bcl11b        | PROMOTER               | 0.515                                                        | 0.644                          | 1347.74            | 868.21             | 0.332                          | 1134.29            | 376.64             |
| A_68_P26233347 | chr8:124956923-124956967                          | NM_007806:-104          | Cyba          | PROMOTER               | 0.515                                                        | 0.547                          | 1100.64            | 602.03             | 0.282                          | 904.73             | 255.00             |
| A_68_P24880219 | chr6:137703098-137703142                          | NM_172733:23            | Dera          | INSIDE                 | 0.515                                                        | 0.390                          | 1596.78            | 622.99             | 0.201                          | 1310.11            | 263.15             |
| A_68_P21111665 | chr2:31702261-31702305                            | NM_178887:-757          | Fibcd1        | PROMOTER               | 0.515                                                        | 0.479                          | 2368.72            | 1135.18            | 0.247                          | 1803.38            | 445.06             |
| A_68_P25411259 | chr7:117161867-117161911                          | NM_181517:-50           | Ipo7          | PROMOTER               | 0.515                                                        | 0.552                          | 949.56             | 524.16             | 0.284                          | 874.94             | 248.56             |
| A_68_P30018898 | chr15:11835366-11835410                           | NM_001039181:41         | Npr3          | INSIDE                 | 0.515                                                        | 0.443                          | 2915.23            | 1291.08            | 0.228                          | 2417.64            | 551.50             |
| A_68_P21707654 | chr2:144353449-144353493                          | NM_029763:-10           | Poir3f        | DIVERGENT_PROMOTER     | 0.515                                                        | 0.383                          | 3800.11            | 1457.21            | 0.197                          | 3178.40            | 627.48             |
| A_68_P23269524 | chr4:124336535-124336579                          | NM_011141:1668          | Pou3f1        | INSIDE                 | 0.515                                                        | 0.447                          | 1919.96            | 858.72             | 0.230                          | 1485.26            | 341.83             |
| A_68_P28698040 | chr12:104770943-104770987                         | NM_028980:190           | Ppp4r4        | INSIDE                 | 0.515                                                        | 0.546                          | 2406.01            | 1314.29            | 0.281                          | 1969.38            | 553.65             |
| A_68_P28611531 | chr12:88019465-88019515                           | NM_177354:-159          | Vash1         | PROMOTER               | 0.515                                                        | 0.684                          | 1095.39            | 748.84             | 0.352                          | 803.68             | 282.97             |
| A_68_P20565673 | chr1:123074631-123074675                          | AK045543:90602          |               | INSIDE                 | 0.515                                                        | 0.568                          | 1014.34            | 575.87             | 0.292                          | 733.95             | 214.68             |
| A_68_P23404035 | chr4:149422780-149422824                          | ENSMUST00000134236:-319 |               | PROMOTER               | 0.515                                                        | 0.517                          | 1437.99            | 743.77             | 0.266                          | 1136.85            | 302.59             |
| A_68_P25677407 | chr8:14911603-14911647                            | NM_001037736:-92        | Arhgef10      | PROMOTER               | 0.514                                                        | 0.531                          | 2007.66            | 1065.07            | 0.273                          | 1585.43            | 432.17             |
| A_68_P28725020 | chr12:109218453-109218497                         | NM_001079883:23150      | Bcl11b        | INSIDE                 | 0.514                                                        | 0.522                          | 1741.54            | 909.57             | 0.269                          | 1359.26            | 365.23             |
| A_68_P27309451 | chr10:85061404-85061448                           | NM_001017525:271        | Btbd11        | INSIDE                 | 0.514                                                        | 0.434                          | 2082.85            | 903.63             | 0.223                          | 1569.36            | 349.73             |
| A_68_P21762930 | chr2:154718365-154718409                          | NM_026030:256           | Eif2s2        | INSIDE                 | 0.514                                                        | 0.404                          | 1515.20            | 611.42             | 0.208                          | 1128.13            | 234.09             |
| A_68_P29660085 | chr14:63864436-63864480                           | NM_008092:-361          | Gata4         | PROMOTER               | 0.514                                                        | 0.597                          | 1016.09            | 606.78             | 0.307                          | 842.41             | 258.44             |
| A_68_P29503210 | chr14:30821909-30821953                           | NM_019583:152           | Il17rb        | INSIDE                 | 0.514                                                        | 0.416                          | 2050.39            | 853.93             | 0.214                          | 1709.47            | 366.18             |
| A_68_P31220014 | chr17:49072235-49072279                           | NM_027452:350           | Lrfn2         | INSIDE                 | 0.514                                                        | 0.570                          | 1560.05            | 889.24             | 0.293                          | 1206.37            | 353.68             |
| A_68_P21576250 | chr2:120434989-120435033                          | NM_025657:41            | Lrre57        | INSIDE                 | 0.514                                                        | 0.469                          | 1152.32            | 540.37             | 0.241                          | 995.00             | 239.74             |
| A_68_P21550150 | chr2:115888204-115888259                          | NM_001159569:2126       | Meis2         | INSIDE                 | 0.514                                                        | 0.495                          | 1260.07            | 624.13             | 0.255                          | 1004.28            | 255.89             |
| A_68_P20353933 | chr1:75419052-75419096                            | NM_001085370:36890      | Speg          | INSIDE                 | 0.514                                                        | 0.669                          | 3596.88            | 2407.46            | 0.344                          | 2505.44            | 862.47             |
| A_68_P21395951 | chr2:84877360-84877404                            | NM_001136081:-225       | Ssrp1         | PROMOTER               | 0.514                                                        | 0.739                          | 3665.82            | 2709.21            | 0.380                          | 2642.53            | 1004.21            |
| A_68_P31655787 | chr18:42671213-42671257                           | NM_001039474:94         | Teerg1        | INSIDE                 | 0.514                                                        | 0.558                          | 2278.01            | 1270.94            | 0.287                          | 1850.43            | 530.33             |
| A_68_P27290579 | chr10:81033785-81033829                           | NM_019725:-4470         | Tle2          | PROMOTER               | 0.514                                                        | 0.602                          | 3634.26            | 2189.17            | 0.310                          | 2801.37            | 867.32             |
| A_68_P24049902 | chr5:122804456-122804500                          | NM_019780:-57           | Vps29         | INSIDE                 | 0.514                                                        | 0.688                          | 2582.45            | 1776.29            | 0.353                          | 1990.30            | 703.43             |
| A_68_P23692831 | chr5:52506869-52506913                            | AK076709:-1661          |               | PROMOTER               | 0.514                                                        | 0.542                          | 2493.95            | 1351.59            | 0.279                          | 2230.71            | 621.46             |
| A_68_P25653638 | chr8:11187989-11188033                            | ENSMUST00000151014:256  |               | INSIDE                 | 0.514                                                        | 0.539                          | 1477.14            | 796.28             | 0.277                          | 1199.82            | 332.17             |
| A_68_P26883803 | chr9:121403379-121403423                          | NM_031161:1407          | Cek           | INSIDE                 | 0.513                                                        | 0.743                          | 2674.70            | 1987.12            | 0.381                          | 1869.53            | 711.97             |
| A_68_P28752829 | chr12:114067223-114067267                         | NM_028023:356           | Cdca4         | INSIDE                 | 0.513                                                        | 0.670                          | 3014.77            | 2019.46            | 0.344                          | 2247.10            | 772.13             |
| A_68_P31928721 | chr19:5447928-5447972                             | NM_010235:253           | Fosl1         | INSIDE                 | 0.513                                                        | 0.555                          | 2362.33            | 1312.03            | 0.285                          | 1703.15            | 485.09             |
| A_68_P27765087 | chr11:45757827-45757871                           | NM_028185:589           | Lsm11         | INSIDE                 | 0.513                                                        | 0.548                          | 1017.78            | 557.34             | 0.281                          | 781.41             | 219.55             |
| A_68_P24946857 | chr7:3644688-3644732                              | NM_029934:417           | Mboat7        | INSIDE                 | 0.513                                                        | 0.400                          | 1815.75            | 726.91             | 0.206                          | 1469.67            | 302.04             |
| A_68_P26821062 | chr9:109834457-109834501                          | NM_001205331:201        | Mtap4         | INSIDE                 | 0.513                                                        | 0.548                          | 2387.42            | 1308.77            | 0.281                          | 1888.78            | 530.86             |
| A_68_P26261063 | chr8:129588776-129588820                          | NM_001122850:843        | Pard3         | INSIDE                 | 0.513                                                        | 0.555                          | 1085.47            | 602.93             | 0.285                          | 750.86             | 213.86             |

| ProbeName      | Target position of probe on CpG island microarray | TargetID          | GeneSymbol    | CpG island Description | Ratio of relative methylation (TiO <sub>2</sub> -NP/Vehicle) | Sham group                     |                    |                    | TiO <sub>2</sub> -H group      |                    |                    |
|----------------|---------------------------------------------------|-------------------|---------------|------------------------|--------------------------------------------------------------|--------------------------------|--------------------|--------------------|--------------------------------|--------------------|--------------------|
|                |                                                   |                   |               |                        |                                                              | Relative methylation (Cy5/Cy3) | Cy3 signal (Input) | Cy5 signal (MeDIP) | Relative methylation (Cy5/Cy3) | Cy3 signal (Input) | Cy5 signal (MeDIP) |
| A_68_P21752418 | chr2:152841222-152841266                          | NM_178939:-125    | Pdrg1         | PROMOTER               | 0.513                                                        | 0.656                          | 1014.82            | 665.35             | 0.336                          | 837.41             | 281.53             |
| A_68_P21867219 | chr2:172847604-172847648                          | NM_019547:224     | Rbm38         | INSIDE                 | 0.513                                                        | 0.711                          | 1925.78            | 1370.09            | 0.365                          | 1461.18            | 532.79             |
| A_68_P29073064 | chr13:58503963-58504007                           | NM_001168248:27   | Rmi1          | INSIDE                 | 0.513                                                        | 0.455                          | 2328.87            | 1060.36            | 0.233                          | 1774.24            | 414.23             |
| A_68_P25408484 | chr7:116662619-116662663                          | NM_011975:-68     | Rpl27a        | PROMOTER               | 0.513                                                        | 0.618                          | 1778.81            | 1099.42            | 0.317                          | 1300.08            | 411.92             |
| A_68_P27989555 | chr1:86358098-86358142                            | NM_001114334:189  | Rps6kb1       | INSIDE                 | 0.513                                                        | 0.518                          | 1411.96            | 731.79             | 0.266                          | 1152.60            | 306.25             |
| A_68_P25507651 | chr7:134985781-134985825                          | NM_009294:481     | Stx4a         | INSIDE                 | 0.513                                                        | 0.509                          | 1031.52            | 524.89             | 0.261                          | 745.01             | 194.56             |
| A_68_P28048726 | chr1:196976651-196976695                          | NM_019507:-27     | Tbx21         | PROMOTER               | 0.513                                                        | 0.478                          | 1637.70            | 783.49             | 0.246                          | 1353.46            | 332.43             |
| A_68_P21084619 | chr2:27281633-27281677                            | NM_009500:691     | Vav2          | INSIDE                 | 0.513                                                        | 0.596                          | 2520.63            | 1502.35            | 0.306                          | 1744.29            | 533.62             |
| A_68_P27212532 | chr10:67010792-67010836                           | NM_001005419:889  | Ado           | INSIDE                 | 0.512                                                        | 0.635                          | 858.81             | 545.74             | 0.325                          | 664.71             | 216.20             |
| A_68_P27897126 | chr11:69609386-69609430                           | NM_009601:31      | Chrb1         | INSIDE                 | 0.512                                                        | 0.661                          | 1292.68            | 854.96             | 0.338                          | 1008.82            | 341.48             |
| A_68_P32143334 | chr19:46413011-46413055                           | NM_001164290:118  | Cuedc2        | INSIDE                 | 0.512                                                        | 0.469                          | 1230.91            | 577.32             | 0.240                          | 1008.01            | 241.88             |
| A_68_P31160531 | chr17:35837972-35838016                           | NM_001198833:-459 | Ddr1          | PROMOTER               | 0.512                                                        | 0.598                          | 2415.69            | 1445.06            | 0.306                          | 1771.13            | 542.49             |
| A_68_P27445215 | chr10:110182553-110182597                         | NM_178609:54      | E2f7          | INSIDE                 | 0.512                                                        | 0.436                          | 1420.39            | 619.06             | 0.223                          | 1097.74            | 244.80             |
| A_68_P30446023 | chr15:93105424-93105468                           | NM_001033275:69   | Gxylt1        | INSIDE                 | 0.512                                                        | 0.475                          | 1298.36            | 616.26             | 0.243                          | 1064.07            | 258.39             |
| A_68_P24798577 | chr6:120413598-120413642                          | NM_008359:406     | Il17ra        | INSIDE                 | 0.512                                                        | 0.712                          | 1682.85            | 1198.87            | 0.365                          | 1554.18            | 566.60             |
| A_68_P24990858 | chr7:19589997-19590041                            | NM_178757:605     | Irf2bp1       | INSIDE                 | 0.512                                                        | 0.649                          | 4180.13            | 2712.88            | 0.332                          | 3243.74            | 1076.99            |
| A_68_P31158190 | chr17:35332751-35332795                           | NM_008518:1321    | Ltb           | INSIDE                 | 0.512                                                        | 0.484                          | 1166.87            | 564.21             | 0.248                          | 895.35             | 221.65             |
| A_68_P29443159 | chr14:20570751-20570795                           | NM_008695:294     | Nid2          | INSIDE                 | 0.512                                                        | 0.519                          | 1191.32            | 618.11             | 0.266                          | 971.94             | 258.12             |
| A_68_P27638836 | chr1:121893026-21893070                           | NM_011023:8606    | Otx1          | DOWNSTREAM             | 0.512                                                        | 0.605                          | 1749.74            | 1058.92            | 0.310                          | 1436.46            | 444.96             |
| A_68_P24907678 | chr6:142912941-142912985                          | NM_011374:10      | St8sia1       | INSIDE                 | 0.512                                                        | 4.197                          | 2260.30            | 9487.15            | 2.149                          | 1804.81            | 3878.40            |
| A_68_P24114328 | chr5:135499558-135499602                          | NM_016801:139     | Stx1a         | INSIDE                 | 0.512                                                        | 0.650                          | 1259.02            | 818.09             | 0.333                          | 1013.75            | 337.49             |
| A_68_P28042483 | chr11:95985716-95985760                           | NM_172799:-9361   | Till6         | PROMOTER               | 0.512                                                        | 0.665                          | 958.90             | 637.64             | 0.341                          | 944.08             | 321.73             |
| A_68_P31215625 | chr17:48179041-48179085                           | AK007241:-3819    |               | PROMOTER               | 0.512                                                        | 0.729                          | 1847.15            | 1346.97            | 0.373                          | 1533.05            | 572.26             |
| A_68_P27835624 | chr11:59040902-59040946                           | NM_001130408:740  | Arf1          | INSIDE                 | 0.511                                                        | 0.617                          | 2545.03            | 1569.28            | 0.315                          | 1884.92            | 593.33             |
| A_68_P21646218 | chr2:133378320-133378364                          | NM_007553:-592    | Bmp2          | PROMOTER               | 0.511                                                        | 0.700                          | 1924.24            | 1346.76            | 0.357                          | 1606.86            | 574.39             |
| A_68_P28279804 | chr12:21292173-21292217                           | NM_018813:37      | Cpsf3         | INSIDE                 | 0.511                                                        | 0.635                          | 852.53             | 541.29             | 0.325                          | 694.88             | 225.55             |
| A_68_P22288630 | chr3:83844564-83844615                            | NM_172681:-506    | D930015E06Rik | PROMOTER               | 0.511                                                        | 0.600                          | 1416.59            | 850.62             | 0.307                          | 1108.94            | 340.37             |
| A_68_P31333824 | chr17:71660558-71660602                           | NM_145158:-275    | Emilin2       | PROMOTER               | 0.511                                                        | 0.673                          | 2729.26            | 1836.49            | 0.344                          | 2302.06            | 791.75             |
| A_68_P30801798 | chr16:60605990-60606034                           | NM_007938:-655    | Epha6         | PROMOTER               | 0.511                                                        | 0.467                          | 1476.39            | 689.57             | 0.239                          | 1364.89            | 325.79             |
| A_68_P25273844 | chr7:88908139-88908183                            | NM_025997:322     | Fam103a1      | INSIDE                 | 0.511                                                        | 0.550                          | 982.21             | 539.94             | 0.281                          | 705.12             | 198.12             |
| A_68_P29034749 | chr13:51942380-51942424                           | NM_011817:359     | Gadd45g       | INSIDE                 | 0.511                                                        | 0.623                          | 1565.13            | 975.81             | 0.318                          | 1087.34            | 346.26             |
| A_68_P22864172 | chr4:41702487-41702531                            | NM_016658:383     | Galt          | INSIDE                 | 0.511                                                        | 0.631                          | 2104.90            | 1329.09            | 0.323                          | 1595.48            | 515.14             |
| A_68_P26458693 | chr9:42751946-42751990                            | NM_175481:486     | Grik4         | INSIDE                 | 0.511                                                        | 1.462                          | 9798.38            | 14322.62           | 0.747                          | 6431.69            | 4805.55            |
| A_68_P26020946 | chr8:87180770-87180814                            | NM_010499:5959    | Ier2          | DOWNSTREAM             | 0.511                                                        | 0.431                          | 2241.58            | 965.52             | 0.220                          | 1678.43            | 369.65             |
| A_68_P30506990 | chr16:3884336-3884380                             | NM_029090:-260    | Nat15         | PROMOTER               | 0.511                                                        | 0.549                          | 2044.21            | 1122.05            | 0.281                          | 1551.00            | 435.45             |
| A_68_P31622630 | chr18:36357100-36357144                           | NM_001167891:-308 | Nrg2          | PROMOTER               | 0.511                                                        | 0.452                          | 1860.39            | 840.59             | 0.231                          | 1443.43            | 333.15             |
| A_68_P27835027 | chr11:58949650-58949694                           | NM_001171512:205  | Obscn         | INSIDE                 | 0.511                                                        | 0.537                          | 1404.96            | 753.92             | 0.274                          | 1265.11            | 346.76             |
| A_68_P25368681 | chr7:107756005-107756054                          | NM_001163663:-70  | Rab6          | PROMOTER               | 0.511                                                        | 0.514                          | 1615.80            | 830.53             | 0.263                          | 1380.20            | 362.52             |
| A_68_P30350127 | chr15:76540848-76540892                           | NM_058214:119     | Recq4         | INSIDE                 | 0.511                                                        | 0.668                          | 1775.08            | 1186.16            | 0.342                          | 1352.78            | 462.13             |
| A_68_P30377736 | chr15:81230239-81230283                           | NM_133726:-136    | St13          | DIVERGENT_PROMOTER     | 0.511                                                        | 0.636                          | 1652.89            | 1051.20            | 0.325                          | 1243.42            | 404.08             |
| A_68_P24951866 | chr7:5013371-5013415                              | NM_001205231:-352 | U2af2         | PROMOTER               | 0.511                                                        | 0.525                          | 1150.93            | 604.71             | 0.268                          | 918.34             | 246.56             |
| A_68_P25411817 | chr7:117265589-117265633                          | NM_009516:38      | Wee1          | INSIDE                 | 0.511                                                        | 0.375                          | 1760.24            | 660.82             | 0.192                          | 1550.17            | 297.36             |
| A_68_P31615538 | chr18:35091084-35091128                           | NM_144866:551     | Etf1          | INSIDE                 | 0.510                                                        | 0.632                          | 2002.13            | 1264.58            | 0.322                          | 1498.30            | 482.38             |
| A_68_P25023288 | chr7:29517538-29517582                            | NM_015796:15752   | Fbxo17        | INSIDE                 | 0.510                                                        | 0.588                          | 912.14             | 536.30             | 0.300                          | 817.40             | 245.08             |
| A_68_P30630410 | chr16:28445868-28445912                           | NM_183064:-577    | Fgf12         | PROMOTER               | 0.510                                                        | 0.707                          | 2576.61            | 1821.60            | 0.360                          | 1966.69            | 708.89             |
| A_68_P21345229 | chr2:75497988-75498032                            | NR_033513:664     | Gm6793        | INSIDE                 | 0.510                                                        | 0.486                          | 2613.81            | 1269.29            | 0.248                          | 2037.51            | 504.86             |
| A_68_P20897165 | chr1:186556818-186556862                          | NM_008250:-468    | Hlx           | PROMOTER               | 0.510                                                        | 0.627                          | 1028.58            | 644.62             | 0.320                          | 926.83             | 296.27             |
| A_68_P24609843 | chr6:86338939-86338994                            | NM_025823:8178    | Peyox1        | INSIDE                 | 0.510                                                        | 3.848                          | 666.54             | 2564.55            | 1.963                          | 552.45             | 1084.53            |
| A_68_P28269480 | chr12:17273418-17273462                           | NM_027959:40      | Pdia6         | INSIDE                 | 0.510                                                        | 0.651                          | 2058.29            | 1340.09            | 0.332                          | 1785.25            | 592.77             |
| A_68_P31295068 | chr17:64681131-64681175                           | NM_001025309:71   | Pja2          | INSIDE                 | 0.510                                                        | 0.442                          | 2533.20            | 1119.03            | 0.225                          | 2101.75            | 473.18             |
| A_68_P20642552 | chr1:137815854-137815898                          | NM_019645:-275    | Pkp1          | PROMOTER               | 0.510                                                        | 0.611                          | 2166.92            | 1323.26            | 0.311                          | 1704.79            | 530.71             |

| ProbeName      | Target position of probe on CpG island microarray | TargetID               | GeneSymbol    | CpG island Description | Ratio of relative methylation (TiO <sub>2</sub> -NP/Vehicle) | Sham group                     |                    |                    | TiO <sub>2</sub> -H group      |                    |                    |
|----------------|---------------------------------------------------|------------------------|---------------|------------------------|--------------------------------------------------------------|--------------------------------|--------------------|--------------------|--------------------------------|--------------------|--------------------|
|                |                                                   |                        |               |                        |                                                              | Relative methylation (Cy5/Cy3) | Cy3 signal (Input) | Cy5 signal (MeDIP) | Relative methylation (Cy5/Cy3) | Cy3 signal (Input) | Cy5 signal (MeDIP) |
| A_68_P30396225 | chr15:84511839-84511883                           | NM_146061:433          | Prr5          | INSIDE                 | 0.510                                                        | 0.501                          | 2069.43            | 1036.24            | 0.255                          | 1674.23            | 427.60             |
| A_68_P24591678 | chr6:83092414-83092458                            | NM_009106:5359         | Rtkn          | INSIDE                 | 0.510                                                        | 0.544                          | 1362.14            | 740.92             | 0.277                          | 1054.37            | 292.49             |
| A_68_P27138498 | chr10:52410952-52410996                           | NM_178675:668          | Slc35f1       | INSIDE                 | 0.510                                                        | 0.542                          | 982.61             | 532.30             | 0.277                          | 855.59             | 236.59             |
| A_68_P25618383 | chr8:4677621-4677665                              | ENSMUST00000058918:723 |               | INSIDE                 | 0.510                                                        | 0.714                          | 3232.09            | 2306.85            | 0.364                          | 2311.63            | 842.24             |
| A_68_P32202582 | chr19:56797590-56797634                           | NM_007419:751          | Adrb1         | INSIDE                 | 0.509                                                        | 0.519                          | 1228.43            | 637.95             | 0.265                          | 789.68             | 208.88             |
| A_68_P28593178 | chr12:84861329-84861374                           | NM_030246:-64          | Deaf4         | PROMOTER               | 0.509                                                        | 0.659                          | 1175.40            | 774.41             | 0.336                          | 951.78             | 319.41             |
| A_68_P20612316 | chr1:132774985-132775029                          | NM_026976:12653        | Faim3         | INSIDE                 | 0.509                                                        | 0.366                          | 1452.22            | 531.65             | 0.186                          | 1143.31            | 213.05             |
| A_68_P21486778 | chr2:103867915-103867959                          | NM_020593:-19          | Fbxo3         | PROMOTER               | 0.509                                                        | 0.500                          | 1250.65            | 625.27             | 0.254                          | 1039.88            | 264.62             |
| A_68_P24728933 | chr6:107479987-107480031                          | NM_008516:289          | Lrrn1         | INSIDE                 | 0.509                                                        | 0.571                          | 2352.89            | 1344.39            | 0.291                          | 1889.07            | 549.00             |
| A_68_P21199929 | chr2:48804619-48804663                            | NR_033442:147          | Orc4          | INSIDE                 | 0.509                                                        | 0.697                          | 1869.92            | 1302.45            | 0.354                          | 1442.42            | 511.04             |
| A_68_P21142145 | chr2:37298992-37299036                            | NM_001033960:-8759     | Rabgap1       | PROMOTER               | 0.509                                                        | 0.687                          | 1727.49            | 1186.17            | 0.349                          | 1324.23            | 462.48             |
| A_68_P21780568 | chr2:157854743-157854787                          | NM_027434:235          | Rprd1b        | INSIDE                 | 0.509                                                        | 0.595                          | 2441.06            | 1452.79            | 0.303                          | 1892.12            | 573.15             |
| A_68_P23344730 | chr4:137806358-137806402                          | NM_001099631:55        | Sh2d5         | INSIDE                 | 0.509                                                        | 0.413                          | 2445.43            | 1010.44            | 0.210                          | 1774.98            | 373.19             |
| A_68_P31412112 | chr17:86086622-86086666                           | NM_011380:950          | Six2          | INSIDE                 | 0.509                                                        | 0.627                          | 1292.35            | 809.94             | 0.319                          | 1152.84            | 367.85             |
| A_68_P22956443 | chr4:59450910-59450954                            | NM_001163288:573       | Susd1         | INSIDE                 | 0.509                                                        | 0.730                          | 6056.34            | 4421.95            | 0.372                          | 4740.52            | 1762.26            |
| A_68_P30510785 | chr16:4558716-4558760                             | NM_031182:982          | Tefap4        | INSIDE                 | 0.509                                                        | 0.429                          | 2293.06            | 983.82             | 0.218                          | 1732.25            | 378.00             |
| A_68_P24114264 | chr5:135485504-135485548                          | NR_033794:201          | Abhd11        | INSIDE                 | 0.508                                                        | 0.669                          | 1282.03            | 857.73             | 0.340                          | 938.05             | 318.73             |
| A_68_P29977061 | chr15:3945633-3945677                             | NM_145930:98           | AW549877      | INSIDE                 | 0.508                                                        | 0.642                          | 2560.84            | 1643.83            | 0.326                          | 2170.23            | 708.28             |
| A_68_P25586435 | chr7:148246749-148246793                          | NM_177897:-402         | B4galnt4      | PROMOTER               | 0.508                                                        | 0.609                          | 864.20             | 526.70             | 0.309                          | 774.20             | 239.57             |
| A_68_P25094601 | chr7:52962152-52962196                            | NM_016974:1558         | Dbp           | INSIDE                 | 0.508                                                        | 0.503                          | 1957.27            | 984.22             | 0.255                          | 1589.42            | 405.91             |
| A_68_P22317567 | chr3:88963692-88963736                            | NM_008227:365          | Hen3          | INSIDE                 | 0.508                                                        | 0.589                          | 1460.91            | 861.08             | 0.299                          | 1216.82            | 364.27             |
| A_68_P31217293 | chr17:48549071-48549115                           | NM_001110832:53        | Nfya          | INSIDE                 | 0.508                                                        | 0.742                          | 5210.63            | 3868.13            | 0.377                          | 3695.38            | 1394.35            |
| A_68_P26345766 | chr9:20969493-20969537                            | NM_183408:-643         | Pde4a         | PROMOTER               | 0.508                                                        | 0.715                          | 1602.54            | 1145.24            | 0.363                          | 1262.67            | 458.37             |
| A_68_P30346951 | chr15:76060156-76060200                           | NM_201385:-251         | Plec          | PROMOTER               | 0.508                                                        | 0.478                          | 1602.64            | 765.41             | 0.242                          | 1309.91            | 317.54             |
| A_68_P25581338 | chr7:147130178-147130222                          | NM_009482:446          | Utf1          | INSIDE                 | 0.508                                                        | 0.603                          | 1427.31            | 861.20             | 0.306                          | 1137.09            | 348.46             |
| A_68_P26038381 | chr8:90486316-90486360                            | NM_033327:-2844        | Zfp423        | PROMOTER               | 0.508                                                        | 0.687                          | 1521.67            | 1045.01            | 0.349                          | 1154.13            | 402.49             |
| A_68_P30388925 | chr15:83357441-83357485                           | NM_007546:171          | Bik           | INSIDE                 | 0.507                                                        | 0.664                          | 1048.29            | 695.80             | 0.337                          | 851.32             | 286.62             |
| A_68_P30486705 | chr15:100445276-100445320                         | NM_011873:-794         | Dazap2        | PROMOTER               | 0.507                                                        | 0.408                          | 1286.53            | 524.76             | 0.207                          | 1011.88            | 209.35             |
| A_68_P24868564 | chr6:135683145-135683189                          | NM_008171:440363       | Grin2b        | INSIDE                 | 0.507                                                        | 4.190                          | 1333.07            | 5585.51            | 2.125                          | 917.72             | 1950.39            |
| A_68_P22311357 | chr3:87827642-87827686                            | NM_022031:3769         | Hapln2        | INSIDE                 | 0.507                                                        | 0.621                          | 1291.59            | 802.02             | 0.315                          | 1091.23            | 343.72             |
| A_68_P20799115 | chr1:168169115-168169174                          | NM_175296:-269         | Mael          | PROMOTER               | 0.507                                                        | 5.741                          | 186.23             | 1069.13            | 2.909                          | 135.52             | 394.29             |
| A_68_P31139421 | chr17:31523560-31523605                           | NM_001163748:404       | Pde9a         | INSIDE                 | 0.507                                                        | 0.698                          | 1798.13            | 1254.35            | 0.354                          | 1297.10            | 459.05             |
| A_68_P24995081 | chr7:20334787-20334831                            | NM_008990:114          | Pvrl2         | INSIDE                 | 0.507                                                        | 0.647                          | 2243.68            | 1452.11            | 0.328                          | 1670.83            | 547.76             |
| A_68_P26948616 | chr10:12728440-12728484                           | NM_175102:207          | Sf3b5         | INSIDE                 | 0.507                                                        | 0.432                          | 2366.77            | 1022.64            | 0.219                          | 1933.08            | 423.55             |
| A_68_P27923087 | chr11:74709868-74709912                           | NM_197943:692          | Sgsm2         | INSIDE                 | 0.507                                                        | 0.520                          | 1107.95            | 576.24             | 0.264                          | 894.69             | 236.03             |
| A_68_P27848102 | chr11:61191658-61191702                           | NM_026183:-103         | Slc47a1       | PROMOTER               | 0.507                                                        | 1.406                          | 3890.51            | 5468.60            | 0.713                          | 3248.35            | 2315.81            |
| A_68_P32036080 | chr19:26680365-26680409                           | NM_011416:737          | Smarca2       | INSIDE                 | 0.507                                                        | 0.571                          | 1200.32            | 685.53             | 0.290                          | 959.91             | 278.16             |
| A_68_P27256923 | chr10:74980993-74981047                           | NM_026095:234          | Snrp3         | INSIDE                 | 0.507                                                        | 0.481                          | 1409.53            | 678.13             | 0.244                          | 1050.05            | 256.07             |
| A_68_P31152609 | chr17:34324546-34324590                           | NM_001161730:68        | Tap1          | INSIDE                 | 0.507                                                        | 0.532                          | 2606.50            | 1387.87            | 0.270                          | 2083.49            | 562.90             |
| A_68_P26459754 | chr9:42924375-42924419                            | NM_001034863:257       | Tmem136       | INSIDE                 | 0.507                                                        | 0.585                          | 906.18             | 530.44             | 0.297                          | 705.80             | 209.28             |
| A_68_P28936501 | chr13:34169775-34169819                           | NM_009450:81           | Tubb2a        | INSIDE                 | 0.507                                                        | 0.539                          | 1638.25            | 882.70             | 0.273                          | 1315.64            | 359.39             |
| A_68_P26805304 | chr9:106724237-106724281                          | NM_001015507:-48       | Vprbp         | PROMOTER               | 0.507                                                        | 0.710                          | 1469.79            | 1043.29            | 0.360                          | 1103.93            | 397.48             |
| A_68_P26871701 | chr9:119231116-119231160                          | ENSMUST00000128880:302 |               | INSIDE                 | 0.507                                                        | 0.626                          | 878.26             | 549.98             | 0.317                          | 674.69             | 214.02             |
| A_68_P24541218 | chr6:72297585-72297629                            | NM_026696:296          | 0610030E20Rik | INSIDE                 | 0.506                                                        | 0.640                          | 1200.57            | 768.92             | 0.324                          | 976.07             | 316.47             |
| A_68_P25581585 | chr7:147164519-147164563                          | NM_001033465:114       | 6430531B16Rik | INSIDE                 | 0.506                                                        | 0.590                          | 1228.92            | 724.51             | 0.298                          | 839.09             | 250.14             |
| A_68_P20239575 | chr1:54982981-54983025                            | NM_001081433:229       | Ankrd44       | INSIDE                 | 0.506                                                        | 0.502                          | 1728.21            | 868.19             | 0.254                          | 1361.37            | 345.90             |
| A_68_P31776706 | chr18:64820510-64820554                           | NM_001001488:122       | Atp8b1        | INSIDE                 | 0.506                                                        | 0.644                          | 1484.65            | 956.16             | 0.326                          | 1323.99            | 431.07             |
| A_68_P29682516 | chr14:67627743-67627787                           | NM_009761:-50          | Bnip3l        | PROMOTER               | 0.506                                                        | 0.648                          | 1485.99            | 962.27             | 0.328                          | 1149.10            | 376.56             |
| A_68_P24225087 | chr6:8209485-8209529                              | NR_033518:219          | Gm16039       | INSIDE                 | 0.506                                                        | 0.565                          | 2212.07            | 1250.54            | 0.286                          | 1747.95            | 500.35             |
| A_68_P29856566 | chr14:102128766-102128810                         | NM_201529:-356         | Lmo7          | PROMOTER               | 0.506                                                        | 0.395                          | 1807.39            | 714.19             | 0.200                          | 1485.16            | 296.82             |
| A_68_P25957673 | chr8:74115916-74115960                            | NM_025396:-144         | Pgls          | PROMOTER               | 0.506                                                        | 0.377                          | 3086.45            | 1162.11            | 0.191                          | 2465.23            | 470.05             |

| ProbeName      | Target position of probe on CpG island microarray | TargetID                 | GeneSymbol    | CpG island Description | Ratio of relative methylation (TiO <sub>2</sub> -NP/Vehicle) | Sham group                     |                    |                    | TiO <sub>2</sub> -H group      |                    |                    |
|----------------|---------------------------------------------------|--------------------------|---------------|------------------------|--------------------------------------------------------------|--------------------------------|--------------------|--------------------|--------------------------------|--------------------|--------------------|
|                |                                                   |                          |               |                        |                                                              | Relative methylation (Cy5/Cy3) | Cy3 signal (Input) | Cy5 signal (MeDIP) | Relative methylation (Cy5/Cy3) | Cy3 signal (Input) | Cy5 signal (MeDIP) |
| A_68_P20053922 | chr1:16095556-16095600                            | NM_133832:-384           | Rdh10         | DIVERGENT_PROMOTER     | 0.506                                                        | 0.546                          | 1711.47            | 933.66             | 0.276                          | 1379.27            | 380.66             |
| A_68_P22286849 | chr3:83570700-83570744                            | NM_009144:480            | Sfrp2         | INSIDE                 | 0.506                                                        | 0.704                          | 2903.66            | 2044.40            | 0.357                          | 2270.81            | 809.60             |
| A_68_P25618723 | chr8:4779387-4779431                              | NM_011369:126            | Shcbbp1       | INSIDE                 | 0.506                                                        | 0.369                          | 1739.58            | 641.96             | 0.187                          | 1489.84            | 278.05             |
| A_68_P29070326 | chr13:58009122-58009166                           | NM_001166464:549         | Spock1        | INSIDE                 | 0.506                                                        | 0.524                          | 1246.19            | 653.13             | 0.265                          | 1059.14            | 280.90             |
| A_68_P25724849 | chr8:26128143-26128187                            | NM_027194:482            | Tm2d2         | INSIDE                 | 0.506                                                        | 0.472                          | 1720.20            | 811.15             | 0.239                          | 1345.00            | 321.23             |
| A_68_P28078649 | chr11:102146096-102146140                         | NM_028076:-156           | Tmub2         | PROMOTER               | 0.506                                                        | 0.657                          | 1328.67            | 872.90             | 0.332                          | 1108.92            | 368.39             |
| A_68_P28751782 | chr12:113917645-113917689                         | NM_001100460:616         | Zbtb42        | INSIDE                 | 0.506                                                        | 0.733                          | 2166.76            | 1587.69            | 0.371                          | 1635.97            | 606.63             |
| A_68_P32565206 | chrX:98893365-98893413                            | ENSMUST00000073812:-6199 |               | PROMOTER               | 0.506                                                        | 3.208                          | 1355.34            | 4347.84            | 1.625                          | 589.21             | 957.26             |
| A_68_P20153981 | chr1:37486651-37486695                            | NM_198006:276            | 6330578E17Rik | INSIDE                 | 0.505                                                        | 0.626                          | 2263.79            | 1417.08            | 0.316                          | 1818.64            | 575.33             |
| A_68_P24800464 | chr6:120772369-120772413                          | NM_007510:313            | Atp6v1e1      | INSIDE                 | 0.505                                                        | 0.573                          | 2045.06            | 1172.60            | 0.289                          | 1552.76            | 449.45             |
| A_68_P20351100 | chr1:74939365-74939409                            | NM_021541:323            | Cryba2        | INSIDE                 | 0.505                                                        | 0.611                          | 960.87             | 587.30             | 0.309                          | 797.41             | 246.27             |
| A_68_P28067421 | chr11:100181597-100181641                         | NM_011508:309            | Eif1          | INSIDE                 | 0.505                                                        | 0.388                          | 2398.67            | 929.51             | 0.196                          | 1907.61            | 373.50             |
| A_68_P27784888 | chr11:49608283-49608327                           | NM_013529:648            | Gfpt2         | INSIDE                 | 0.505                                                        | 0.482                          | 1537.48            | 740.55             | 0.243                          | 1337.59            | 325.21             |
| A_68_P27270904 | chr10:77364916-77364963                           | NM_145152:342            | Lrrc3         | INSIDE                 | 0.505                                                        | 0.572                          | 1069.92            | 612.22             | 0.289                          | 833.59             | 240.67             |
| A_68_P22771645 | chr4:20705806-20705850                            | NM_172987:-13            | Nkain3        | PROMOTER               | 0.505                                                        | 3.486                          | 10184.38           | 35497.85           | 1.759                          | 7168.92            | 12613.22           |
| A_68_P31627037 | chr18:37303374-37303418                           | NM_001003672:-226        | Pcdhac2       | PROMOTER               | 0.505                                                        | 0.615                          | 1109.08            | 682.28             | 0.311                          | 974.39             | 302.66             |
| A_68_P30397302 | chr15:84685989-84686033                           | NM_001081166:549         | Phf21b        | INSIDE                 | 0.505                                                        | 0.526                          | 1246.85            | 655.29             | 0.265                          | 978.96             | 259.70             |
| A_68_P24770497 | chr6:115311740-115311784                          | NM_001127330:524         | Pparg         | INSIDE                 | 0.505                                                        | 0.586                          | 2380.61            | 1394.49            | 0.296                          | 1937.70            | 573.60             |
| A_68_P24591254 | chr6:83020596-83020640                            | NM_009392:-399           | Tlx2          | DIVERGENT_PROMOTER     | 0.505                                                        | 0.608                          | 3648.78            | 2219.56            | 0.307                          | 2681.41            | 823.38             |
| A_68_P26052838 | chr8:92871596-92871645                            | NM_172913:531            | Tox3          | INSIDE                 | 0.505                                                        | 0.698                          | 2166.30            | 1512.29            | 0.353                          | 1706.60            | 601.80             |
| A_68_P25948612 | chr8:72426018-72426066                            | NM_032004:-71            | Tssk6         | PROMOTER               | 0.505                                                        | 0.627                          | 991.05             | 621.52             | 0.317                          | 751.56             | 238.08             |
| A_68_P31962486 | chr19:12869204-12869248                           | NR_024093:1387           | U05342        | INSIDE                 | 0.505                                                        | 0.456                          | 2112.45            | 964.22             | 0.230                          | 1734.61            | 399.72             |
| A_68_P26924746 | chr10:8238018-8238062                             | NM_177387:583            | Ust           | INSIDE                 | 0.505                                                        | 0.612                          | 1224.44            | 749.46             | 0.309                          | 964.32             | 297.83             |
| A_68_P22164435 | chr3:57379593-57379637                            | NM_133784:184            | Wwtr1         | INSIDE                 | 0.505                                                        | 0.490                          | 1214.79            | 595.55             | 0.248                          | 1018.93            | 252.32             |
| A_68_P29102452 | chr13:65343492-65343545                           |                          |               | Unknown                | 0.505                                                        | 5.486                          | 5160.80            | 28310.35           | 2.769                          | 3648.61            | 10102.47           |
| A_68_P26397643 | chr9:30729700-30729744                            | NM_001024139:315         | Adamts15      | INSIDE                 | 0.504                                                        | 0.569                          | 1883.97            | 1072.40            | 0.287                          | 1442.49            | 414.02             |
| A_68_P31253494 | chr17:56179975-56180019                           | NM_013733:158            | Chaf1a        | INSIDE                 | 0.504                                                        | 0.505                          | 1012.57            | 511.72             | 0.255                          | 732.23             | 186.66             |
| A_68_P24372701 | chr6:37391699-37391743                            | NM_178661:428            | Creb3l2       | INSIDE                 | 0.504                                                        | 0.562                          | 1416.80            | 796.68             | 0.283                          | 1123.79            | 318.38             |
| A_68_P25505455 | chr7:134536637-134536681                          | NM_198011:477            | E430018J23Rik | INSIDE                 | 0.504                                                        | 0.521                          | 993.18             | 517.43             | 0.263                          | 860.95             | 226.19             |
| A_68_P22308548 | chr3:87329844-87329888                            | NM_001083318:367         | Etv3          | INSIDE                 | 0.504                                                        | 0.497                          | 1438.35            | 715.39             | 0.251                          | 1087.17            | 272.68             |
| A_68_P26134825 | chr8:108129199-108129243                          | NM_001081241:92          | Fam65a        | INSIDE                 | 0.504                                                        | 0.463                          | 4343.91            | 2010.93            | 0.233                          | 3434.23            | 801.16             |
| A_68_P23591965 | chr5:34325967-34326011                            | NM_001033458:-134        | Gm1673        | PROMOTER               | 0.504                                                        | 0.467                          | 1675.98            | 783.04             | 0.235                          | 1339.29            | 315.28             |
| A_68_P20875108 | chr1:182261016-182261060                          | NR_003623:-358           | Gm5069        | PROMOTER               | 0.504                                                        | 0.427                          | 2698.69            | 1151.73            | 0.215                          | 2106.15            | 453.33             |
| A_68_P20875111 | chr1:182261385-182261429                          | NR_003623:-726           | Gm5069        | PROMOTER               | 0.504                                                        | 0.628                          | 1635.64            | 1027.29            | 0.317                          | 1228.47            | 389.23             |
| A_68_P27279732 | chr10:79383697-79383741                           | NM_053244:4003           | Kiss1r        | INSIDE                 | 0.504                                                        | 0.690                          | 2161.99            | 1492.60            | 0.348                          | 1683.69            | 586.03             |
| A_68_P29689081 | chr14:68702832-68702876                           | NM_010910:914            | Nefl          | INSIDE                 | 0.504                                                        | 0.601                          | 1916.37            | 1151.87            | 0.303                          | 1448.18            | 438.39             |
| A_68_P31167786 | chr17:37334030-37334074                           | NM_001011518:859         | Olfir94       | INSIDE                 | 0.504                                                        | 0.627                          | 1326.07            | 831.18             | 0.316                          | 1130.14            | 356.97             |
| A_68_P23433034 | chr4:154009287-154009331                          | NM_001177995:1674        | Prdm16        | INSIDE                 | 0.504                                                        | 0.539                          | 2032.43            | 1095.75            | 0.271                          | 1647.95            | 447.39             |
| A_68_P31108918 | chr17:26340491-26340535                           | NM_001081069:606         | Rgs11         | INSIDE                 | 0.504                                                        | 0.612                          | 1512.53            | 925.60             | 0.309                          | 1224.05            | 377.86             |
| A_68_P21580974 | chr2:121275109-121275153                          | NM_011354:167            | Serf2         | INSIDE                 | 0.504                                                        | 0.508                          | 1930.91            | 981.26             | 0.256                          | 1715.70            | 439.52             |
| A_68_P22169679 | chr3:58496414-58496458                            | NM_009174:-126           | Siah2         | PROMOTER               | 0.504                                                        | 0.590                          | 905.23             | 534.20             | 0.297                          | 801.03             | 238.01             |
| A_68_P21623514 | chr2:129024077-129024121                          | NM_001159593:-410        | Slc20a1       | PROMOTER               | 0.504                                                        | 0.576                          | 2595.13            | 1495.79            | 0.291                          | 1903.21            | 553.12             |
| A_68_P27673276 | chr11:29072349-29072393                           | NM_134034:-534           | Smek2         | PROMOTER               | 0.504                                                        | 0.498                          | 1991.74            | 991.42             | 0.251                          | 1411.18            | 353.74             |
| A_68_P28520017 | chr12:71447587-71447631                           | NM_001110202:993         | Trim9         | INSIDE                 | 0.504                                                        | 0.429                          | 1306.83            | 560.48             | 0.216                          | 1053.01            | 227.62             |
| A_68_P24054162 | chr5:123593214-123593258                          | ENSMUST00000056053:271   |               | INSIDE                 | 0.504                                                        | 0.726                          | 1843.26            | 1337.78            | 0.366                          | 1568.19            | 573.43             |
| A_68_P33012178 | chr9_random:57139-57183                           | NR_027950:2468           | 4930526115Rik | DOWNSTREAM             | 0.503                                                        | 0.409                          | 1912.33            | 781.62             | 0.206                          | 1501.20            | 308.77             |
| A_68_P31096791 | chr17:24489119-24489163                           | NM_001039581:150         | Abca3         | INSIDE                 | 0.503                                                        | 0.575                          | 1359.48            | 781.13             | 0.289                          | 1045.09            | 302.20             |
| A_68_P21111659 | chr2:31701359-31701403                            | NM_178887:145            | Fibcd1        | INSIDE                 | 0.503                                                        | 0.479                          | 1794.74            | 859.85             | 0.241                          | 1531.96            | 369.25             |
| A_68_P30479788 | chr15:99200288-99200332                           | NM_011711:587            | Fmnl3         | INSIDE                 | 0.503                                                        | 0.512                          | 1140.24            | 583.70             | 0.258                          | 798.12             | 205.64             |
| A_68_P24904452 | chr6:142363210-142363254                          | NM_145572:58397          | Gys2          | DOWNSTREAM             | 0.503                                                        | 0.413                          | 1462.01            | 604.36             | 0.208                          | 1226.68            | 255.18             |
| A_68_P23970077 | chr5:108494745-108494789                          | NM_013827:6              | Mtf2          | INSIDE                 | 0.503                                                        | 0.472                          | 1575.18            | 743.09             | 0.237                          | 1182.80            | 280.55             |

| ProbeName      | Target position of probe on CpG island microarray | TargetID          | GeneSymbol | CpG island Description | Ratio of relative methylation (TiO <sub>2</sub> -NP/Vehicle) | Sham group                     |                    |                    | TiO <sub>2</sub> -H group      |                    |                    |
|----------------|---------------------------------------------------|-------------------|------------|------------------------|--------------------------------------------------------------|--------------------------------|--------------------|--------------------|--------------------------------|--------------------|--------------------|
|                |                                                   |                   |            |                        |                                                              | Relative methylation (Cy5/Cy3) | Cy3 signal (Input) | Cy5 signal (MeDIP) | Relative methylation (Cy5/Cy3) | Cy3 signal (Input) | Cy5 signal (MeDIP) |
| A_68_P25522280 | chr7:137690501-137690545                          | NM_001162855:373  | Nsmce4a    | INSIDE                 | 0.503                                                        | 0.564                          | 2401.25            | 1353.98            | 0.284                          | 1791.02            | 508.46             |
| A_68_P21818227 | chr2:164323199-164323243                          | NM_133779:196     | Pigt       | INSIDE                 | 0.503                                                        | 0.627                          | 1939.02            | 1216.47            | 0.315                          | 1421.70            | 448.25             |
| A_68_P20782631 | chr1:165242518-165242562                          | NM_011127:1241    | Prrx1      | INSIDE                 | 0.503                                                        | 0.648                          | 2463.38            | 1597.12            | 0.326                          | 1983.37            | 647.09             |
| A_68_P27630331 | chr11:20101120-20101164                           | NM_008996:462     | Rab1       | PROMOTER               | 0.503                                                        | 0.633                          | 1313.60            | 830.93             | 0.318                          | 915.64             | 291.46             |
| A_68_P26803653 | chr9:106379642-106379686                          | NM_145620:25      | Rrp9       | INSIDE                 | 0.503                                                        | 0.511                          | 1815.86            | 927.42             | 0.257                          | 1356.06            | 348.63             |
| A_68_P28137823 | chr11:112643047-112643091                         | NM_011448:455     | Sox9       | PROMOTER               | 0.503                                                        | 0.674                          | 943.84             | 635.97             | 0.339                          | 792.57             | 268.85             |
| A_68_P21935172 | chr3:9004150-9004194                              | NM_001025263:343  | Tpd52      | INSIDE                 | 0.503                                                        | 0.587                          | 3003.09            | 1762.66            | 0.295                          | 2286.45            | 674.61             |
| A_68_P30388854 | chr15:83341412-83341456                           | NM_178869:97      | Till1      | PROMOTER               | 0.503                                                        | 0.526                          | 2594.20            | 1364.28            | 0.264                          | 1902.91            | 502.95             |
| A_68_P23865423 | chr5:87233404-87233448                            | NM_177680:88      | Ythdc1     | PROMOTER               | 0.503                                                        | 0.719                          | 1949.41            | 1400.99            | 0.362                          | 1550.02            | 560.57             |
| A_68_P21121521 | chr2:33286475-33286519                            | NM_001085507:348  | Zbtb34     | INSIDE                 | 0.503                                                        | 0.511                          | 1156.35            | 591.23             | 0.257                          | 874.47             | 224.73             |
| A_68_P31758245 | chr18:61696023-61696067                           | NM_177828:146     | Arhgef37   | INSIDE                 | 0.502                                                        | 0.570                          | 3424.01            | 1951.50            | 0.286                          | 2888.38            | 826.87             |
| A_68_P29737459 | chr14:77436746-77436790                           | NM_175369:190     | Ccdc122    | INSIDE                 | 0.502                                                        | 0.696                          | 1125.01            | 783.27             | 0.350                          | 1001.93            | 350.47             |
| A_68_P31620296 | chr18:35989257-35989301                           | NM_133687:-193    | Cxxc5      | PROMOTER               | 0.502                                                        | 0.421                          | 1309.01            | 550.85             | 0.211                          | 1045.22            | 221.00             |
| A_68_P21761231 | chr2:154395665-154395709                          | NM_007891:98      | E2f1       | PROMOTER               | 0.502                                                        | 0.342                          | 2061.10            | 704.35             | 0.172                          | 1604.47            | 275.25             |
| A_68_P21727918 | chr2:147872154-147872201                          | NM_010446:528     | Foxa2      | INSIDE                 | 0.502                                                        | 0.593                          | 1016.49            | 602.73             | 0.298                          | 746.00             | 222.03             |
| A_68_P23573357 | chr5:30891361-30891405                            | NM_010608:840     | Kenk3      | INSIDE                 | 0.502                                                        | 0.581                          | 1413.66            | 821.28             | 0.292                          | 1082.69            | 315.65             |
| A_68_P27901340 | chr11:70376701-70376745                           | NM_001045959:340  | Mink1      | INSIDE                 | 0.502                                                        | 0.542                          | 3265.26            | 1769.89            | 0.272                          | 2467.73            | 671.72             |
| A_68_P23905255 | chr5:96638963-96639007                            | NM_001039084:-149 | Mrpl1      | PROMOTER               | 0.502                                                        | 0.715                          | 1586.70            | 1133.80            | 0.359                          | 1245.38            | 446.86             |
| A_68_P21495913 | chr2:105509959-105510003                          | NR_002867:507     | Pax6os1    | INSIDE                 | 0.502                                                        | 0.575                          | 1299.46            | 747.59             | 0.289                          | 1042.77            | 301.29             |
| A_68_P23354494 | chr4:139389036-139389081                          | NM_011039:-175    | Pax7       | PROMOTER               | 0.502                                                        | 0.643                          | 1596.62            | 1027.05            | 0.323                          | 1247.57            | 402.67             |
| A_68_P30979318 | chr16:94085768-94085812                           | NM_011377:286     | Sim2       | INSIDE                 | 0.502                                                        | 0.551                          | 1614.65            | 889.06             | 0.276                          | 1302.63            | 360.09             |
| A_68_P23541735 | chr5:23931232-23931276                            | NM_009207:205     | Slc4a2     | INSIDE                 | 0.502                                                        | 0.591                          | 1220.94            | 721.48             | 0.297                          | 1048.39            | 311.24             |
| A_68_P24090829 | chr5:130293530-130293574                          | NR_003681:-6884   | Snora15    | PROMOTER               | 0.502                                                        | 0.646                          | 1032.41            | 666.54             | 0.324                          | 844.36             | 273.80             |
| A_68_P20352744 | chr1:75216331-75216375                            | NM_009447:-524    | Suba4a     | PROMOTER               | 0.502                                                        | 0.657                          | 1219.81            | 801.55             | 0.330                          | 938.84             | 309.65             |
| A_68_P26356133 | chr9:23028290-23028334                            | NM_028472:793     | Bmper      | INSIDE                 | 0.501                                                        | 0.718                          | 4984.49            | 3577.87            | 0.360                          | 3648.44            | 1311.63            |
| A_68_P26821951 | chr9:110003563-110003607                          | NM_133347:14502   | Dhx30      | INSIDE                 | 0.501                                                        | 0.497                          | 1054.41            | 524.01             | 0.249                          | 862.41             | 214.92             |
| A_68_P21565607 | chr2:118528199-118528243                          | NM_001081971:1479 | Gm1337     | INSIDE                 | 0.501                                                        | 0.573                          | 2083.12            | 1193.66            | 0.287                          | 1618.38            | 464.29             |
| A_68_P20285212 | chr1:63160117-63160161                            | NM_001081436:703  | Ino80d     | INSIDE                 | 0.501                                                        | 0.624                          | 979.00             | 610.57             | 0.312                          | 833.36             | 260.19             |
| A_68_P25512275 | chr7:135883649-135883693                          | NM_145955:273     | Membp      | INSIDE                 | 0.501                                                        | 0.600                          | 1175.55            | 705.52             | 0.300                          | 1019.38            | 306.24             |
| A_68_P20620659 | chr1:134213013-134213057                          | NM_001195025:333  | Nuak2      | INSIDE                 | 0.501                                                        | 0.617                          | 1276.45            | 786.99             | 0.309                          | 1170.21            | 361.54             |
| A_68_P26245546 | chr8:126957920-126957964                          | NM_171824:-106    | Pgbd5      | PROMOTER               | 0.501                                                        | 0.410                          | 1437.98            | 590.23             | 0.206                          | 1129.08            | 232.08             |
| A_68_P29568494 | chr14:45608721-45608765                           | NM_008964:957     | Ptger2     | INSIDE                 | 0.501                                                        | 0.520                          | 2224.91            | 1156.07            | 0.260                          | 1586.01            | 412.60             |
| A_68_P25351155 | chr7:104728838-104728882                          | NM_001081267:455  | Rsf1       | INSIDE                 | 0.501                                                        | 0.578                          | 2138.36            | 1236.69            | 0.290                          | 1872.34            | 542.59             |
| A_68_P20596471 | chr1:129574483-129574527                          | NM_028135:94      | Tmem163    | INSIDE                 | 0.501                                                        | 0.699                          | 1868.43            | 1306.48            | 0.350                          | 1589.87            | 557.18             |
| A_68_P31675570 | chr18:46358067-46358111                           | NM_001170855:384  | Trim36     | INSIDE                 | 0.501                                                        | 0.620                          | 1180.61            | 732.54             | 0.311                          | 987.23             | 306.77             |
| A_68_P26486122 | chr9:47338579-47338623                            | NM_001025600:166  | Cadm1      | INSIDE                 | 0.500                                                        | 0.506                          | 1109.75            | 561.40             | 0.253                          | 835.76             | 211.30             |
| A_68_P23415140 | chr4:151236795-151236839                          | NM_001081557:-939 | Camta1     | PROMOTER               | 0.500                                                        | 0.631                          | 1044.21            | 659.27             | 0.316                          | 825.57             | 260.62             |
| A_68_P30362466 | chr15:78632748-78632792                           | NM_130859:702     | Card10     | INSIDE                 | 0.500                                                        | 0.581                          | 1544.53            | 897.58             | 0.290                          | 1268.59            | 368.48             |
| A_68_P20601161 | chr1:130487885-130487929                          | NM_009911:970     | Cxcr4      | INSIDE                 | 0.500                                                        | 0.419                          | 2586.95            | 1084.96            | 0.210                          | 1983.28            | 415.54             |
| A_68_P24793349 | chr6:119430121-119430165                          | NM_133940:457     | Fbx114     | INSIDE                 | 0.500                                                        | 0.443                          | 1249.63            | 553.10             | 0.221                          | 952.77             | 211.01             |
| A_68_P29717289 | chr14:73784847-73784891                           | NM_008410:210     | Itm2b      | INSIDE                 | 0.500                                                        | 0.645                          | 1090.62            | 703.48             | 0.323                          | 962.78             | 310.73             |
| A_68_P21571250 | chr2:119568776-119568820                          | NM_146125:726     | Itpka      | INSIDE                 | 0.500                                                        | 0.466                          | 1121.11            | 522.59             | 0.233                          | 939.45             | 218.97             |
| A_68_P21666831 | chr2:136940212-136940256                          | NM_013822:2022    | Jag1       | INSIDE                 | 0.500                                                        | 0.531                          | 1250.72            | 663.64             | 0.265                          | 875.80             | 232.27             |
| A_68_P27285906 | chr10:80317819-80317863                           | NM_025349:114     | Lsm7       | INSIDE                 | 0.500                                                        | 0.562                          | 964.30             | 541.89             | 0.281                          | 725.20             | 203.91             |
| A_68_P29142608 | chr13:73984841-73984885                           | NM_028186:217     | Nkd2       | INSIDE                 | 0.500                                                        | 0.591                          | 1343.61            | 794.71             | 0.296                          | 1034.83            | 306.07             |
| A_68_P22522614 | chr3:129581824-129581868                          | NM_183423:-2255   | Pla2g12a   | PROMOTER               | 0.500                                                        | 1.369                          | 3800.75            | 5201.39            | 0.684                          | 2739.15            | 1873.33            |
| A_68_P30475880 | chr15:98507518-98507562                           | NM_172612:352     | Rnd1       | INSIDE                 | 0.500                                                        | 0.509                          | 2553.07            | 1299.78            | 0.255                          | 2075.69            | 528.77             |
| A_68_P29050859 | chr13:54795572-54795616                           | NR_027395:-273    | Rnf44      | DIVERGENT_PROMOTER     | 0.500                                                        | 0.552                          | 2845.53            | 1571.61            | 0.276                          | 2362.35            | 652.97             |
| A_68_P27259390 | chr10:75384205-75384249                           | NM_001161853:133  | Smarcb1    | INSIDE                 | 0.500                                                        | 0.330                          | 1647.38            | 542.89             | 0.165                          | 1498.10            | 246.72             |
| A_68_P27851931 | chr11:61890435-61890479                           | NM_001029936:-142 | Specc1     | PROMOTER               | 0.500                                                        | 3.261                          | 4090.40            | 13339.98           | 1.631                          | 2596.31            | 4235.81            |
| A_68_P20937460 | chr1:193149822-193149866                          | NM_025864:1       | Tmem206    | INSIDE                 | 0.500                                                        | 0.606                          | 936.75             | 567.97             | 0.303                          | 746.32             | 226.24             |



| ProbeName      | Target position of probe on CpG island microarray | TargetID                | GeneSymbol    | CpG island Description | Ratio of relative methylation (TiO <sub>2</sub> -NP/Vehicle) | Sham group                     |                    |                    | TiO <sub>2</sub> -H group      |                    |                    |
|----------------|---------------------------------------------------|-------------------------|---------------|------------------------|--------------------------------------------------------------|--------------------------------|--------------------|--------------------|--------------------------------|--------------------|--------------------|
|                |                                                   |                         |               |                        |                                                              | Relative methylation (Cy5/Cy3) | Cy3 signal (Input) | Cy5 signal (MeDIP) | Relative methylation (Cy5/Cy3) | Cy3 signal (Input) | Cy5 signal (MeDIP) |
| A_68_P31771008 | chr18:63851869-63851913                           | NM_016792:123           | Txn1l         | INSIDE                 | 0.500                                                        | 0.624                          | 967.36             | 604.02             | 0.312                          | 795.19             | 248.03             |
| A_68_P28729922 | chr12:110031214-110031258                         | NM_009537:-284          | Yy1           | PROMOTER               | 0.500                                                        | 0.706                          | 3619.11            | 2555.48            | 0.353                          | 2766.67            | 976.39             |
| A_68_P25241764 | chr7:82926889-82926933                            | AK049415:-9978          |               | PROMOTER               | 0.500                                                        | 0.667                          | 4412.53            | 2944.48            | 0.334                          | 3362.99            | 1121.56            |
| A_68_P20935795 | chr1:192849358-192849402                          | NR_027298:151           | A230020J21Rik | INSIDE                 | 0.499                                                        | 0.543                          | 1577.88            | 856.18             | 0.271                          | 1289.41            | 348.96             |
| A_68_P28567750 | chr12:80231609-80231653                           | NM_009705:-144          | Arg2          | PROMOTER               | 0.499                                                        | 0.548                          | 1062.12            | 582.11             | 0.273                          | 855.37             | 233.72             |
| A_68_P27677359 | chr11:29924618-29924662                           | NM_146016:1393          | Eml6          | INSIDE                 | 0.499                                                        | 0.668                          | 1041.80            | 695.63             | 0.333                          | 875.65             | 291.61             |
| A_68_P24674232 | chr6:97567208-97567252                            | NM_145148:421           | Frmd4b        | INSIDE                 | 0.499                                                        | 0.668                          | 1871.75            | 1250.40            | 0.333                          | 1258.95            | 419.73             |
| A_68_P26319145 | chr9:14556214-14556258                            | NM_010242:330           | Fut4          | INSIDE                 | 0.499                                                        | 0.513                          | 1155.82            | 592.86             | 0.256                          | 969.65             | 248.00             |
| A_68_P25021899 | chr7:29221970-29222015                            | NM_022024:-473          | Gmfg          | DIVERGENT_PROMOTER     | 0.499                                                        | 0.618                          | 1029.93            | 636.38             | 0.308                          | 901.62             | 277.76             |
| A_68_P28077066 | chr11:101887900-101887944                         | NM_007863:347           | Mpp3          | INSIDE                 | 0.499                                                        | 0.653                          | 1395.17            | 911.44             | 0.326                          | 1050.26            | 342.28             |
| A_68_P29237525 | chr13:95645453-95645497                           | NM_011021:-107          | Otp           | PROMOTER               | 0.499                                                        | 0.567                          | 1406.86            | 797.81             | 0.283                          | 1267.55            | 358.50             |
| A_68_P26016104 | chr8:86223190-86223234                            | NM_177262:-134          | Pkn1          | PROMOTER               | 0.499                                                        | 0.574                          | 1098.93            | 630.83             | 0.286                          | 899.64             | 257.49             |
| A_68_P24061289 | chr5:124890348-124890392                          | NM_030241:432           | Setd8         | INSIDE                 | 0.499                                                        | 0.534                          | 4435.36            | 2367.73            | 0.266                          | 3424.01            | 912.46             |
| A_68_P29116719 | chr13:69750004-69750048                           | NM_175283:315           | Srd5a1        | INSIDE                 | 0.499                                                        | 0.542                          | 2348.08            | 1273.45            | 0.270                          | 1991.53            | 538.44             |
| A_68_P27560196 | chr11:4795414-4795458                             | NM_172438:91            | Thoc5         | INSIDE                 | 0.499                                                        | 0.703                          | 1912.31            | 1344.39            | 0.351                          | 1524.05            | 534.85             |
| A_68_P29438120 | chr14:19159804-19159848                           | NM_009455:4532          | Ube2e1        | INSIDE                 | 0.499                                                        | 1.438                          | 13529.53           | 19455.29           | 0.718                          | 9696.69            | 6961.56            |
| A_68_P28567992 | chr12:80273136-80273180                           | NM_016800:287           | Vti1b         | INSIDE                 | 0.499                                                        | 0.647                          | 2254.18            | 1459.04            | 0.323                          | 1866.96            | 602.41             |
| A_68_P27926186 | chr11:75268311-75268355                           | NM_138950:-113          | Wdr81         | DIVERGENT_PROMOTER     | 0.499                                                        | 0.685                          | 1489.05            | 1019.78            | 0.341                          | 1045.26            | 356.93             |
| A_68_P27083332 | chr10:40022071-40022115                           | NM_009665:-98           | Amd1          | PROMOTER               | 0.498                                                        | 0.615                          | 1393.29            | 856.67             | 0.306                          | 1096.09            | 335.78             |
| A_68_P26426474 | chr9:36533941-36533985                            | NM_007691:281           | Chck1         | INSIDE                 | 0.498                                                        | 0.617                          | 2866.35            | 1769.95            | 0.308                          | 2181.68            | 671.28             |
| A_68_P24600279 | chr6:84535601-84535645                            | NM_175475:8182          | Cyp26b1       | INSIDE                 | 0.498                                                        | 0.661                          | 845.60             | 559.03             | 0.329                          | 781.39             | 257.13             |
| A_68_P26224705 | chr8:123653054-123653101                          | NM_008024:1493          | Fox11         | INSIDE                 | 0.498                                                        | 0.652                          | 1045.68            | 681.81             | 0.325                          | 798.27             | 259.20             |
| A_68_P23964040 | chr5:107354969-107355013                          | NM_177873:-81           | Hfim1         | PROMOTER               | 0.498                                                        | 0.639                          | 2141.64            | 1367.76            | 0.318                          | 1834.41            | 583.29             |
| A_68_P32095577 | chr19:37509810-37509854                           | NM_008245:502           | Hhex          | INSIDE                 | 0.498                                                        | 0.365                          | 2104.86            | 768.63             | 0.182                          | 1796.54            | 326.42             |
| A_68_P32051826 | chr19:29325786-29325831                           | NM_001048177:-509       | Jak2          | PROMOTER               | 0.498                                                        | 0.408                          | 2178.12            | 887.94             | 0.203                          | 1962.57            | 398.06             |
| A_68_P28161570 | chr11:116704403-116704447                         | NM_033398:339           | Jmjd6         | INSIDE                 | 0.498                                                        | 0.734                          | 2270.11            | 1665.81            | 0.366                          | 1630.54            | 596.14             |
| A_68_P26022975 | chr8:87504092-87504136                            | NM_008416:-1467         | Junb          | PROMOTER               | 0.498                                                        | 0.681                          | 1146.44            | 780.67             | 0.339                          | 1015.43            | 344.21             |
| A_68_P24990613 | chr7:19542978-19543022                            | NM_001029877:31764      | Nova2         | INSIDE                 | 0.498                                                        | 0.658                          | 1894.30            | 1246.22            | 0.328                          | 1379.28            | 452.06             |
| A_68_P26766650 | chr9:99775559-99775603                            | NM_011440:1009          | Sox14         | INSIDE                 | 0.498                                                        | 0.698                          | 1933.57            | 1350.29            | 0.348                          | 1542.75            | 536.85             |
| A_68_P28740640 | chr12:112082039-112082083                         | NM_011973:-2911         | Stk30         | DIVERGENT_PROMOTER     | 0.498                                                        | 0.699                          | 1298.54            | 908.06             | 0.348                          | 1025.62            | 356.89             |
| A_68_P21962519 | chr3:16083394-16083438                            | NM_001145919:234        | Ythdf3        | INSIDE                 | 0.498                                                        | 0.479                          | 1491.03            | 713.64             | 0.238                          | 1208.42            | 287.88             |
| A_68_P31260731 | A_68_P31260731                                    |                         |               | Unknown                | 0.498                                                        | 0.513                          | 1531.13            | 785.43             | 0.256                          | 1222.57            | 312.56             |
| A_68_P25890690 | chr8:59819837-59819881                            | ENSMUST00000132988:8944 |               | DOWNSTREAM             | 0.498                                                        | 0.632                          | 1163.87            | 735.94             | 0.315                          | 1070.31            | 337.23             |
| A_68_P21044872 | chr2:19352911-19352955                            | ENSMUST00000137714:678  |               | INSIDE                 | 0.498                                                        | 0.581                          | 1296.24            | 752.53             | 0.289                          | 1028.10            | 297.09             |
| A_68_P26235838 | chr8:125299671-125299715                          | NM_144932:288           | Acsf3         | INSIDE                 | 0.497                                                        | 0.634                          | 879.09             | 557.22             | 0.315                          | 751.30             | 236.47             |
| A_68_P31862682 | chr18:80347987-80348031                           | NM_175028:213           | Adnp2         | INSIDE                 | 0.497                                                        | 0.641                          | 6326.56            | 4058.41            | 0.319                          | 4988.63            | 1590.41            |
| A_68_P29270037 | chr13:101545636-101545680                         | NM_021886:196           | Cenph         | INSIDE                 | 0.497                                                        | 0.482                          | 1991.03            | 959.10             | 0.239                          | 1613.78            | 386.23             |
| A_68_P23247367 | chr4:119487484-119487528                          | NM_010657:224           | Hivep3        | INSIDE                 | 0.497                                                        | 0.581                          | 1776.78            | 1032.20            | 0.289                          | 1394.74            | 403.02             |
| A_68_P26682081 | chr9:83040074-83040118                            | NM_026122:118           | Hmgn3         | INSIDE                 | 0.497                                                        | 0.640                          | 1373.14            | 879.38             | 0.318                          | 1083.76            | 344.67             |
| A_68_P20735832 | chr1:156945633-156945677                          | NM_010500:1112          | Ier5          | INSIDE                 | 0.497                                                        | 0.656                          | 1503.64            | 986.31             | 0.326                          | 1275.79            | 415.95             |
| A_68_P25737017 | chr8:28284572-28284616                            | NM_001080813:524        | Rab11fip1     | INSIDE                 | 0.497                                                        | 0.587                          | 4001.98            | 2348.08            | 0.291                          | 3137.30            | 914.17             |
| A_68_P24536421 | chr6:71389996-71390040                            | NM_024288:613           | Rmnd5a        | INSIDE                 | 0.497                                                        | 0.495                          | 2162.93            | 1071.61            | 0.246                          | 1714.27            | 422.27             |
| A_68_P30596855 | chr16:22266102-22266148                           | NM_009186:-122          | Tra2b         | PROMOTER               | 0.497                                                        | 0.469                          | 1763.69            | 826.70             | 0.233                          | 1298.29            | 302.60             |
| A_68_P26816565 | chr9:108686233-108686277                          | ENSMUST00000035219:128  |               | INSIDE                 | 0.497                                                        | 0.542                          | 1993.23            | 1079.69            | 0.269                          | 1531.95            | 412.37             |
| A_68_P32070030 | chr19:32464044-32464088                           | NR_033198:361           | 2700046G09Rik | INSIDE                 | 0.496                                                        | 0.679                          | 1243.17            | 844.35             | 0.337                          | 1071.11            | 361.03             |
| A_68_P28612732 | chr12:88224969-88225013                           | NM_145836:774           | 6430527G18Rik | INSIDE                 | 0.496                                                        | 0.516                          | 1454.63            | 750.69             | 0.256                          | 1240.20            | 317.14             |
| A_68_P31464038 | chr18:4635009-4635053                             | NM_001081963:104        | 9430020K01Rik | INSIDE                 | 0.496                                                        | 0.512                          | 3171.82            | 1624.49            | 0.254                          | 2380.57            | 605.03             |
| A_68_P29387299 | chr14:8835518-8835562                             | NM_025341:125           | Ahbd6         | INSIDE                 | 0.496                                                        | 0.496                          | 1829.45            | 908.22             | 0.246                          | 1383.90            | 341.01             |
| A_68_P31541315 | chr18:20904732-20904776                           | NM_019737:151           | B4gal6        | INSIDE                 | 0.496                                                        | 0.483                          | 3673.30            | 1774.40            | 0.239                          | 2711.68            | 649.15             |
| A_68_P22874559 | chr4:43970296-43970340                            | NM_027450:-255          | Glipr2        | PROMOTER               | 0.496                                                        | 0.559                          | 1771.03            | 989.51             | 0.277                          | 1386.07            | 383.78             |
| A_68_P23441153 | chr4:155243478-155243522                          | NM_024472:49            | Gltpd1        | INSIDE                 | 0.496                                                        | 0.652                          | 897.42             | 585.11             | 0.323                          | 694.65             | 224.60             |

| ProbeName      | Target position of probe on CpG island microarray | TargetID                | GeneSymbol    | CpG island Description | Ratio of relative methylation (TiO <sub>2</sub> -NP/Vehicle) | Sham group                     |                    |                    | TiO <sub>2</sub> -H group      |                    |                    |
|----------------|---------------------------------------------------|-------------------------|---------------|------------------------|--------------------------------------------------------------|--------------------------------|--------------------|--------------------|--------------------------------|--------------------|--------------------|
|                |                                                   |                         |               |                        |                                                              | Relative methylation (Cy5/Cy3) | Cy3 signal (Input) | Cy5 signal (MeDIP) | Relative methylation (Cy5/Cy3) | Cy3 signal (Input) | Cy5 signal (MeDIP) |
| A_68_P29026628 | chr13:49777406-49777450                           | NM_172015:-70           | Iars          | PROMOTER               | 0.496                                                        | 0.548                          | 1193.14            | 653.29             | 0.272                          | 896.64             | 243.65             |
| A_68_P27271936 | chr10:77532518-77532562                           | NM_015790:428           | Icosl         | INSIDE                 | 0.496                                                        | 0.466                          | 1122.48            | 522.87             | 0.231                          | 925.33             | 213.67             |
| A_68_P21816596 | chr2:163993800-163993844                          | NM_008435:3027          | Kens1         | INSIDE                 | 0.496                                                        | 0.552                          | 1509.46            | 833.12             | 0.274                          | 1233.01            | 337.56             |
| A_68_P27994973 | chr11:87405603-87405647                           | NM_133215:-94           | Mtmr4         | PROMOTER               | 0.496                                                        | 1.489                          | 5235.41            | 7798.09            | 0.739                          | 3633.11            | 2683.93            |
| A_68_P20590467 | chr1:128389351-128389395                          | NM_172484:132           | Nekap5        | INSIDE                 | 0.496                                                        | 0.592                          | 1414.93            | 837.30             | 0.293                          | 1179.18            | 346.01             |
| A_68_P32760557 | chrX:152059508-152059553                          | NM_001093750:-1660      | Ptchd1        | PROMOTER               | 0.496                                                        | 0.613                          | 1047.90            | 641.91             | 0.304                          | 410.56             | 124.87             |
| A_68_P30485731 | chr15:100253716-100253768                         | NM_008732:-256          | Slc11a2       | PROMOTER               | 0.496                                                        | 0.653                          | 1447.85            | 944.76             | 0.324                          | 1067.65            | 345.79             |
| A_68_P31058944 | chr17:14416346-14416390                           | NM_022315:-144          | Smoc2         | PROMOTER               | 0.496                                                        | 0.549                          | 1622.83            | 891.43             | 0.272                          | 1123.03            | 305.84             |
| A_68_P29107216 | chr13:67161978-67162022                           | NM_001166218:106        | Zfp712        | INSIDE                 | 0.496                                                        | 0.614                          | 1579.81            | 969.42             | 0.304                          | 1241.60            | 378.03             |
| A_68_P29961926 | chr14:122873265-122873309                         | NM_009574:-1319         | Zic2          | DIVERGENT_PROMOTER     | 0.496                                                        | 0.613                          | 2803.90            | 1718.23            | 0.304                          | 2119.16            | 644.41             |
| A_68_P21127430 | chr2:34262482-34262526                            | ENSMUST00000147337:-198 |               | PROMOTER               | 0.496                                                        | 0.536                          | 2465.42            | 1321.60            | 0.266                          | 2199.96            | 585.52             |
| A_68_P21127432 | chr2:34262730-34262774                            | ENSMUST00000147337:50   |               | INSIDE                 | 0.496                                                        | 0.618                          | 1482.75            | 916.35             | 0.306                          | 1120.34            | 343.31             |
| A_68_P30394508 | chr15:84237151-84237195                           | NM_001163145:40355      | 1810041L15Rik | INSIDE                 | 0.495                                                        | 3.611                          | 5381.34            | 19431.95           | 1.786                          | 3483.19            | 6219.70            |
| A_68_P21421625 | chr2:91105340-91105384                            | NM_001166024:91         | Arfgap2       | INSIDE                 | 0.495                                                        | 0.604                          | 1291.45            | 779.89             | 0.299                          | 948.79             | 283.61             |
| A_68_P33008888 | chr12:21117412-21117456                           | NM_001004364:-182       | Asap2         | PROMOTER               | 0.495                                                        | 0.624                          | 2182.03            | 1360.53            | 0.309                          | 1852.20            | 572.08             |
| A_68_P25458767 | chr7:125676796-125676840                          | NM_009940:9             | Coq7          | INSIDE                 | 0.495                                                        | 0.687                          | 1716.01            | 1179.57            | 0.340                          | 1340.19            | 455.98             |
| A_68_P27696175 | chr11:33580643-33580689                           | NM_001190885:162919     | Kenip1        | INSIDE                 | 0.495                                                        | 0.672                          | 1483.55            | 996.39             | 0.333                          | 1260.53            | 419.36             |
| A_68_P30018903 | chr15:11836061-11836105                           | NM_001039181:-653       | Npr3          | PROMOTER               | 0.495                                                        | 0.722                          | 1765.01            | 1275.08            | 0.357                          | 1463.43            | 523.00             |
| A_68_P25050419 | chr7:36432218-36432262                            | NM_019746:261           | Pdcod5        | INSIDE                 | 0.495                                                        | 0.524                          | 1773.00            | 928.48             | 0.259                          | 1469.40            | 381.18             |
| A_68_P29388217 | chr14:9005728-9005772                             | NM_024221:-244          | Pdhh          | PROMOTER               | 0.495                                                        | 0.695                          | 1410.05            | 979.64             | 0.344                          | 1176.69            | 404.65             |
| A_68_P23610088 | chr5:37260189-37260233                            | NM_172994:402           | Ppp2r2c       | INSIDE                 | 0.495                                                        | 0.675                          | 1768.04            | 1193.35            | 0.334                          | 1317.65            | 440.50             |
| A_68_P22319356 | chr3:89234182-89234226                            | NM_026869:-554          | Pygo2         | PROMOTER               | 0.495                                                        | 0.461                          | 1171.65            | 540.19             | 0.228                          | 971.62             | 221.59             |
| A_68_P25953808 | chr8:73279185-73279229                            | NM_001166399:629        | Rab3a         | INSIDE                 | 0.495                                                        | 0.628                          | 1646.81            | 1034.74            | 0.311                          | 1179.88            | 367.20             |
| A_68_P32036081 | chr19:26680484-26680528                           | NM_011416:857           | Smarca2       | INSIDE                 | 0.495                                                        | 0.463                          | 1318.06            | 610.05             | 0.229                          | 1232.79            | 282.36             |
| A_68_P30374040 | chr15:80542264-80542308                           | NM_144812:544           | Tnrc6b        | INSIDE                 | 0.495                                                        | 0.647                          | 2328.40            | 1505.81            | 0.320                          | 1688.43            | 540.25             |
| A_68_P32260636 | chrX:11712923-11712967                            | NM_001168321:24537      | Bcor          | INSIDE                 | 0.494                                                        | 0.527                          | 1614.31            | 851.15             | 0.261                          | 660.37             | 172.06             |
| A_68_P25948527 | chr8:72412099-72412143                            | NM_026818:-829          | Cilp2         | PROMOTER               | 0.494                                                        | 0.726                          | 1619.68            | 1176.51            | 0.359                          | 1040.00            | 372.95             |
| A_68_P32121150 | chr19:42506930-42506974                           | NM_145123:-679          | Crtac1        | PROMOTER               | 0.494                                                        | 0.601                          | 1071.34            | 643.49             | 0.297                          | 792.14             | 235.11             |
| A_68_P24047549 | chr5:122398855-122398899                          | NM_007804-98958         | Cux2          | INSIDE                 | 0.494                                                        | 0.424                          | 1593.28            | 674.77             | 0.209                          | 1301.92            | 272.49             |
| A_68_P32030085 | chr19:25580326-25580370                           | NM_015826:153           | Dmrt1         | INSIDE                 | 0.494                                                        | 0.668                          | 1249.14            | 833.98             | 0.330                          | 999.07             | 329.54             |
| A_68_P29515525 | chr14:32898520-32898564                           | NM_001047433:309        | Dph3          | INSIDE                 | 0.494                                                        | 0.402                          | 2249.71            | 905.32             | 0.199                          | 1744.50            | 347.04             |
| A_68_P22149458 | chr3:54539187-54539231                            | NM_001163570:78         | Exosc8        | INSIDE                 | 0.494                                                        | 0.560                          | 2287.99            | 1281.08            | 0.276                          | 1736.72            | 479.98             |
| A_68_P30487413 | chr15:100559897-100559941                         | NM_001161767:-111       | Galnt6        | PROMOTER               | 0.494                                                        | 0.518                          | 2203.93            | 1142.41            | 0.256                          | 1760.26            | 450.33             |
| A_68_P27973306 | chr11:83567372-83567416                           | NM_145432:256           | Heatr6        | INSIDE                 | 0.494                                                        | 0.358                          | 1511.56            | 541.48             | 0.177                          | 1255.91            | 222.24             |
| A_68_P31938325 | chr19:7240713-7240757                             | NM_134147:109477        | Macrodl       | INSIDE                 | 0.494                                                        | 0.601                          | 1881.54            | 1131.71            | 0.297                          | 1393.49            | 413.83             |
| A_68_P27926234 | chr11:75275864-75275908                           | NR_029739:-1331         | Mir22         | PROMOTER               | 0.494                                                        | 0.502                          | 1393.46            | 699.44             | 0.248                          | 1145.59            | 284.29             |
| A_68_P21600380 | chr2:124949503-124949547                          | NM_001162417:-128       | Myef2         | PROMOTER               | 0.494                                                        | 0.465                          | 1835.58            | 853.12             | 0.229                          | 1450.53            | 332.74             |
| A_68_P31923511 | chr19:4510848-4510892                             | NM_001162946:399        | Pex           | INSIDE                 | 0.494                                                        | 0.652                          | 1093.31            | 712.58             | 0.322                          | 931.84             | 299.86             |
| A_68_P20163206 | chr1:39044427-39044471                            | NM_026850:-210          | Pdcl3         | PROMOTER               | 0.494                                                        | 0.423                          | 3066.50            | 1298.39            | 0.209                          | 2276.08            | 476.23             |
| A_68_P25093636 | chr7:52781291-52781335                            | NM_008654:326           | Ppp1r15a      | INSIDE                 | 0.494                                                        | 0.592                          | 1683.46            | 996.36             | 0.292                          | 1416.98            | 414.25             |
| A_68_P28118795 | chr11:109335066-109335110                         | NM_001029842:-178       | Slc16a6       | PROMOTER               | 0.494                                                        | 0.603                          | 1130.37            | 681.16             | 0.298                          | 940.74             | 280.31             |
| A_68_P21765289 | chr2:155212485-155212529                          | NM_178111:4915          | Trp53inp2     | INSIDE                 | 0.494                                                        | 1.369                          | 3149.57            | 4313.11            | 0.677                          | 2137.30            | 1446.26            |
| A_68_P21622285 | chr2:128793081-128793125                          | NM_178404:-35           | Zc3h6         | PROMOTER               | 0.494                                                        | 0.506                          | 1903.96            | 964.00             | 0.250                          | 1312.20            | 328.14             |
| A_68_P24130914 | chr5:139060935-139060979                          | NM_001044747:15         | Zfp68         | INSIDE                 | 0.494                                                        | 0.723                          | 1924.95            | 1391.16            | 0.357                          | 1499.59            | 535.79             |
| A_68_P27255927 | chr10:74779785-74779829                           | NM_009630:119           | Adora2a       | INSIDE                 | 0.493                                                        | 0.672                          | 1237.39            | 831.22             | 0.331                          | 943.47             | 312.53             |
| A_68_P22520456 | chr3:129237236-129237280                          | NM_130450:1955          | Elov16        | INSIDE                 | 0.493                                                        | 0.615                          | 1443.86            | 888.58             | 0.303                          | 1109.90            | 336.77             |
| A_68_P21115862 | chr2:32390731-32390776                            | NM_153560:-125          | Fam102a       | PROMOTER               | 0.493                                                        | 0.363                          | 1535.39            | 557.81             | 0.179                          | 1201.38            | 215.36             |
| A_68_P26421597 | chr9:35075221-35075265                            | NM_194257:110           | Fam118b       | INSIDE                 | 0.493                                                        | 0.560                          | 1163.26            | 651.81             | 0.276                          | 933.09             | 257.77             |
| A_68_P24133859 | chr5:139625867-139625911                          | NM_001081265:-288       | Heatr2        | PROMOTER               | 0.493                                                        | 3.006                          | 10901.91           | 32770.22           | 1.481                          | 6902.72            | 10221.18           |
| A_68_P26228503 | chr8:124254738-124254782                          | NM_020605:302           | Jph3          | INSIDE                 | 0.493                                                        | 0.662                          | 4592.01            | 3037.78            | 0.326                          | 3475.80            | 1132.46            |
| A_68_P25098820 | chr7:53652793-53652837                            | NM_001112739:948        | Kenc1         | INSIDE                 | 0.493                                                        | 0.725                          | 2334.88            | 1692.51            | 0.357                          | 1771.71            | 633.10             |

| ProbeName      | Target position of probe on CpG island microarray | TargetID          | GeneSymbol    | CpG island Description | Ratio of relative methylation (TiO <sub>2</sub> -NP/Vehicle) | Sham group                     |                    |                    | TiO <sub>2</sub> -H group      |                    |                    |
|----------------|---------------------------------------------------|-------------------|---------------|------------------------|--------------------------------------------------------------|--------------------------------|--------------------|--------------------|--------------------------------|--------------------|--------------------|
|                |                                                   |                   |               |                        |                                                              | Relative methylation (Cy5/Cy3) | Cy3 signal (Input) | Cy5 signal (MeDIP) | Relative methylation (Cy5/Cy3) | Cy3 signal (Input) | Cy5 signal (MeDIP) |
| A_68_P23192856 | chr4:107476288-107476332                          | NM_001080926:1447 | Lrp8          | INSIDE                 | 0.493                                                        | 0.692                          | 1614.87            | 1117.23            | 0.341                          | 1128.58            | 385.27             |
| A_68_P22056222 | chr3:35899243-35899287                            | NM_023644:336     | Mecc1         | INSIDE                 | 0.493                                                        | 0.460                          | 1174.19            | 539.96             | 0.227                          | 919.31             | 208.37             |
| A_68_P21495956 | chr2:105515369-105515413                          | NM_013627:-1211   | Pax6          | DIVERGENT_PROMOTER     | 0.493                                                        | 0.451                          | 1145.93            | 516.28             | 0.222                          | 925.68             | 205.79             |
| A_68_P22345831 | chr3:95622735-95622779                            | NM_001081293:120  | Rprd2         | INSIDE                 | 0.493                                                        | 0.687                          | 2580.20            | 1771.66            | 0.339                          | 1837.65            | 622.59             |
| A_68_P22030179 | chr3:30692442-30692486                            | NM_027016:667     | Sec62         | INSIDE                 | 0.493                                                        | 0.596                          | 2371.11            | 1413.16            | 0.294                          | 1916.45            | 563.10             |
| A_68_P29023537 | chr13:49242028-49242072                           | NM_029361:1333    | Wnk2          | INSIDE                 | 0.493                                                        | 0.553                          | 1026.73            | 567.95             | 0.273                          | 760.28             | 207.34             |
| A_68_P30686477 | chr16:38522888-38522932                           | NM_024273:-163    | 4930455C21Rik | PROMOTER               | 0.492                                                        | 0.730                          | 1769.00            | 1292.00            | 0.359                          | 1288.50            | 462.83             |
| A_68_P20331601 | chr1:71603829-71603873                            | NM_026195:121     | Atic          | INSIDE                 | 0.492                                                        | 0.572                          | 1087.42            | 622.15             | 0.282                          | 942.67             | 265.52             |
| A_68_P25275162 | chr7:89137615-89137659                            | NM_007562:-451    | Bnc1          | PROMOTER               | 0.492                                                        | 0.655                          | 901.73             | 590.46             | 0.322                          | 598.73             | 192.80             |
| A_68_P29134764 | chr13:72761714-72761758                           | NR_030701:4276    | D430050G20    | INSIDE                 | 0.492                                                        | 0.716                          | 1701.25            | 1217.58            | 0.352                          | 1327.54            | 467.01             |
| A_68_P31677411 | chr18:46685323-46685367                           | NM_173423:281     | Fem1c         | INSIDE                 | 0.492                                                        | 0.694                          | 3789.43            | 2629.76            | 0.341                          | 2702.09            | 922.10             |
| A_68_P23796638 | chr5:73648010-73648054                            | NM_028194:-175    | Fryl          | PROMOTER               | 0.492                                                        | 0.432                          | 1338.67            | 578.04             | 0.212                          | 1027.83            | 218.19             |
| A_68_P24519506 | chr6:66986584-66986628                            | NM_007836:795     | Gadd45a       | INSIDE                 | 0.492                                                        | 0.572                          | 3227.80            | 1846.34            | 0.282                          | 2687.87            | 756.64             |
| A_68_P23927130 | chr5:100406931-100406976                          | NM_001077265:1004 | Hnrmpd        | INSIDE                 | 0.492                                                        | 0.521                          | 1374.29            | 715.84             | 0.256                          | 1040.83            | 266.89             |
| A_68_P28041918 | chr11:95867212-95867256                           | NM_009951:24      | Igf2bp1       | INSIDE                 | 0.492                                                        | 0.525                          | 1538.94            | 807.91             | 0.258                          | 1191.60            | 307.57             |
| A_68_P29612545 | chr14:55082897-55082941                           | NM_022993:-65     | Lrp10         | PROMOTER               | 0.492                                                        | 0.465                          | 1962.67            | 912.81             | 0.229                          | 1527.36            | 349.52             |
| A_68_P22303239 | chr3:86351242-86351286                            | NM_011839:941     | Mab21l2       | INSIDE                 | 0.492                                                        | 0.598                          | 1614.71            | 964.91             | 0.294                          | 1195.95            | 351.85             |
| A_68_P29237593 | chr13:95652973-95653017                           | NM_011021:7413    | Otp           | INSIDE                 | 0.492                                                        | 0.526                          | 1211.10            | 636.50             | 0.259                          | 1074.15            | 277.83             |
| A_68_P29057276 | chr13:55930039-55930083                           | NM_011097:2726    | Pitx1         | INSIDE                 | 0.492                                                        | 0.714                          | 2090.57            | 1493.64            | 0.352                          | 1604.25            | 564.22             |
| A_68_P30476735 | chr15:98661367-98661411                           | NM_016781:551     | Prkag1        | INSIDE                 | 0.492                                                        | 0.550                          | 1437.00            | 789.77             | 0.270                          | 1160.60            | 313.62             |
| A_68_P31108119 | chr17:26204737-26204781                           | NM_001162868:1364 | Rab11fip3     | INSIDE                 | 0.492                                                        | 0.685                          | 1720.41            | 1179.28            | 0.337                          | 1446.61            | 487.65             |
| A_68_P26805685 | chr9:106788200-106788244                          | NM_175402:1109    | Rbm15b        | INSIDE                 | 0.492                                                        | 0.598                          | 1088.56            | 651.41             | 0.294                          | 830.57             | 244.54             |
| A_68_P31924875 | chr19:4756268-4756312                             | NM_025717:-234    | Rbm4b         | PROMOTER               | 0.492                                                        | 0.689                          | 1893.55            | 1304.09            | 0.339                          | 1588.78            | 538.28             |
| A_68_P22336825 | chr3:93324681-93324725                            | NM_016740:285     | S100a11       | INSIDE                 | 0.492                                                        | 0.475                          | 1116.92            | 529.99             | 0.234                          | 890.27             | 208.04             |
| A_68_P30489277 | chr15:100877902-100877949                         | NM_011323:111224  | Scn8a         | DOWNSTREAM             | 0.492                                                        | 0.572                          | 1566.30            | 896.17             | 0.281                          | 1222.01            | 343.79             |
| A_68_P26983369 | chr10:19569958-19570002                           | NM_029529:1285    | Slc35d3       | INSIDE                 | 0.492                                                        | 0.503                          | 1367.23            | 688.20             | 0.248                          | 1009.08            | 249.76             |
| A_68_P21092715 | chr2:28555096-28555140                            | NM_027283:53      | 1700026L06Rik | INSIDE                 | 0.491                                                        | 0.650                          | 1138.32            | 739.99             | 0.319                          | 940.14             | 300.02             |
| A_68_P21566798 | chr2:118728254-118728298                          | NM_001045523:926  | Bahd1         | INSIDE                 | 0.491                                                        | 0.615                          | 1793.63            | 1103.81            | 0.302                          | 1414.19            | 427.61             |
| A_68_P30588523 | chr16:20619843-20619887                           | NM_028420:1487    | Camk2n2       | INSIDE                 | 0.491                                                        | 1.360                          | 5028.18            | 6836.13            | 0.667                          | 3604.50            | 2405.53            |
| A_68_P21075528 | chr2:25838113-25838157                            | NM_001115076:668  | Camsap1       | INSIDE                 | 0.491                                                        | 0.707                          | 3109.82            | 2199.19            | 0.347                          | 2264.66            | 786.34             |
| A_68_P21107277 | chr2:31008194-31008238                            | NM_178760:381     | Gpr107        | INSIDE                 | 0.491                                                        | 0.521                          | 1101.55            | 573.61             | 0.256                          | 929.38             | 237.79             |
| A_68_P27258887 | chr10:75299960-75300008                           | NM_010361:-2358   | Gstt2         | PROMOTER               | 0.491                                                        | 0.664                          | 1469.45            | 975.94             | 0.326                          | 1161.91            | 379.01             |
| A_68_P22348231 | chr3:96025351-96025395                            | NM_178214:329     | Hist2h2be     | INSIDE                 | 0.491                                                        | 0.348                          | 2059.56            | 717.03             | 0.171                          | 1615.94            | 276.38             |
| A_68_P23637425 | chr5:42155503-42155547                            | NM_007524:-65     | Nkx3-2        | PROMOTER               | 0.491                                                        | 0.530                          | 2223.40            | 1178.35            | 0.260                          | 1664.94            | 432.94             |
| A_68_P26816178 | chr9:108595255-108595302                          | NM_008924:805     | Prkar2a       | INSIDE                 | 0.491                                                        | 0.645                          | 804.21             | 518.88             | 0.317                          | 700.23             | 222.05             |
| A_68_P21707834 | chr2:144381520-144381564                          | NM_019787:-470    | Sec23b        | DIVERGENT_PROMOTER     | 0.491                                                        | 0.524                          | 1561.14            | 817.77             | 0.257                          | 1207.69            | 310.56             |
| A_68_P24950723 | chr7:4781645-4781689                              | NM_172737:14632   | Shisa7        | INSIDE                 | 0.491                                                        | 2.830                          | 3360.14            | 9507.66            | 1.390                          | 2245.47            | 3120.90            |
| A_68_P21330529 | chr2:73112421-73112465                            | NM_001005343:2460 | Sp9           | INSIDE                 | 0.491                                                        | 0.660                          | 3662.17            | 2418.17            | 0.324                          | 2776.38            | 899.26             |
| A_68_P31932352 | chr19:6047496-6047540                             | NM_001164709:374  | Syvn1         | INSIDE                 | 0.491                                                        | 0.502                          | 1959.48            | 983.17             | 0.246                          | 1510.55            | 372.35             |
| A_68_P22323355 | chr3:89883388-89883433                            | NM_022314:6795    | Tpm3          | INSIDE                 | 0.491                                                        | 0.404                          | 1330.90            | 537.16             | 0.198                          | 1163.31            | 230.75             |
| A_68_P29143150 | chr13:74074924-74074968                           | NM_027182:269     | Trip13        | INSIDE                 | 0.491                                                        | 0.462                          | 3704.86            | 1709.81            | 0.227                          | 2739.37            | 620.89             |
| A_68_P30356630 | chr15:77759323-77759367                           | NM_019913:80      | Txn2          | INSIDE                 | 0.491                                                        | 0.516                          | 1660.39            | 857.00             | 0.253                          | 1292.87            | 327.33             |
| A_68_P20509920 | chr1:108609243-108609287                          | NM_009741:1603    | Bel2          | INSIDE                 | 0.490                                                        | 0.662                          | 1171.34            | 775.04             | 0.324                          | 952.90             | 308.93             |
| A_68_P21611440 | chr2:126896255-126896304                          | NM_026678:-113    | Blvra         | PROMOTER               | 0.490                                                        | 0.663                          | 2615.34            | 1733.34            | 0.325                          | 2058.76            | 669.03             |
| A_68_P31373928 | chr17:79234991-79235035                           | NM_181649:157     | Ccdc75        | INSIDE                 | 0.490                                                        | 0.608                          | 1355.91            | 823.81             | 0.297                          | 1059.03            | 314.99             |
| A_68_P31022580 | chr17:6986963-6987007                             | NM_009510:145     | Ezr           | INSIDE                 | 0.490                                                        | 0.450                          | 1493.85            | 671.80             | 0.220                          | 1262.16            | 277.97             |
| A_68_P23269775 | chr4:124377958-124378002                          | NM_010213:38      | Fhl3          | INSIDE                 | 0.490                                                        | 0.538                          | 2623.76            | 1410.84            | 0.263                          | 2064.18            | 543.47             |
| A_68_P26084323 | chr8:98157470-98157514                            | NM_030198:34      | Gins3         | INSIDE                 | 0.490                                                        | 0.644                          | 1796.46            | 1157.20            | 0.316                          | 1431.88            | 452.09             |
| A_68_P25150561 | chr7:64642517-64642562                            | NR_033504:-102    | Gm9962        | DIVERGENT_PROMOTER     | 0.490                                                        | 0.449                          | 1807.40            | 810.77             | 0.220                          | 1425.00            | 313.44             |
| A_68_P28118150 | chr11:109224474-109224518                         | NM_010303:389     | Gna13         | INSIDE                 | 0.490                                                        | 0.588                          | 2640.98            | 1552.30            | 0.288                          | 2010.43            | 579.54             |
| A_68_P21093572 | chr2:28695445-28695489                            | NM_001166033:414  | Gtf3e4        | INSIDE                 | 0.490                                                        | 0.542                          | 1010.39            | 547.18             | 0.265                          | 800.93             | 212.35             |

| ProbeName      | Target position of probe on CpG island microarray | TargetID           | GeneSymbol    | CpG island Description | Ratio of relative methylation (TiO <sub>2</sub> -NP/Vehicle) | Sham group                     |                    |                    | TiO <sub>2</sub> -H group      |                    |                    |
|----------------|---------------------------------------------------|--------------------|---------------|------------------------|--------------------------------------------------------------|--------------------------------|--------------------|--------------------|--------------------------------|--------------------|--------------------|
|                |                                                   |                    |               |                        |                                                              | Relative methylation (Cy5/Cy3) | Cy3 signal (Input) | Cy5 signal (MeDIP) | Relative methylation (Cy5/Cy3) | Cy3 signal (Input) | Cy5 signal (MeDIP) |
| A_68_P21044976 | chr2:19367626-19367673                            | NM_018809:360      | Ptfla         | INSIDE                 | 0.490                                                        | 0.656                          | 1479.15            | 970.04             | 0.321                          | 1286.41            | 413.57             |
| A_68_P28683724 | chr12:101963187-101963231                         | NM_153587:30       | Rps6ka5       | INSIDE                 | 0.490                                                        | 0.480                          | 2493.49            | 1195.92            | 0.235                          | 2088.58            | 491.28             |
| A_68_P23212280 | chr4:111392824-111392869                          | NM_026470:232      | Spata6        | INSIDE                 | 0.490                                                        | 0.438                          | 1747.77            | 766.17             | 0.215                          | 1483.13            | 318.46             |
| A_68_P22385237 | chr3:103084452-103084496                          | NM_001079830:1259  | Trim33        | INSIDE                 | 0.490                                                        | 0.698                          | 2203.17            | 1538.33            | 0.342                          | 1451.29            | 496.79             |
| A_68_P24830747 | chr6:127059111-127059169                          | NM_177003:430      | 9630033F20Rik | INSIDE                 | 0.489                                                        | 0.628                          | 1497.81            | 940.76             | 0.307                          | 1301.40            | 399.40             |
| A_68_P27560708 | chr11:4887125-4887169                             | NM_007454:239      | Ap1b1         | INSIDE                 | 0.489                                                        | 0.697                          | 4765.26            | 3323.48            | 0.341                          | 3644.17            | 1241.86            |
| A_68_P30472484 | chr15:97835084-97835128                           | NM_001113515:49    | Col2a1        | INSIDE                 | 0.489                                                        | 0.643                          | 1403.13            | 901.75             | 0.315                          | 1122.06            | 352.90             |
| A_68_P30366491 | chr15:79271911-79271956                           | NM_013767:554      | Csnk1c        | INSIDE                 | 0.489                                                        | 0.636                          | 1677.27            | 1067.49            | 0.311                          | 1333.40            | 414.71             |
| A_68_P28493835 | chr12:66176402-66176461                           | NM_178912:-161     | Fanem         | DIVERGENT_PROMOTER     | 0.489                                                        | 0.558                          | 1182.85            | 659.90             | 0.273                          | 861.92             | 235.30             |
| A_68_P29996501 | chr15:7762967-7763011                             | NM_010275:1978     | Gdnf          | INSIDE                 | 0.489                                                        | 0.364                          | 2461.17            | 895.06             | 0.178                          | 1707.36            | 303.57             |
| A_68_P32090698 | chr19:36628741-36628785                           | NM_001163471:-366  | Hectd2        | PROMOTER               | 0.489                                                        | 0.595                          | 2248.85            | 1337.14            | 0.291                          | 1664.63            | 483.79             |
| A_68_P22388053 | chr3:103594655-103594699                          | NM_010432:522      | Hipk1         | INSIDE                 | 0.489                                                        | 0.652                          | 2358.97            | 1538.21            | 0.319                          | 1716.38            | 546.89             |
| A_68_P27804084 | chr11:53114187-53114231                           | NM_008300:-227     | Hspa4         | PROMOTER               | 0.489                                                        | 0.540                          | 1122.90            | 606.22             | 0.264                          | 1038.25            | 274.20             |
| A_68_P22934418 | chr4:55543459-55543503                            | NM_010637:1867     | Klf4          | INSIDE                 | 0.489                                                        | 0.538                          | 1611.10            | 867.00             | 0.263                          | 1261.18            | 332.22             |
| A_68_P27482565 | chr10:117147534-117147578                         | NM_010786:216      | Mdm2          | INSIDE                 | 0.489                                                        | 0.534                          | 1301.76            | 695.21             | 0.261                          | 1130.71            | 295.02             |
| A_68_P29075352 | chr13:58908396-58908440                           | NM_001025074:-775  | Ntrk2         | PROMOTER               | 0.489                                                        | 0.659                          | 2536.05            | 1670.02            | 0.322                          | 1999.16            | 644.05             |
| A_68_P22393108 | chr3:104584185-104584229                          | NM_027982:233      | Ppm1j         | INSIDE                 | 0.489                                                        | 0.626                          | 2432.93            | 1522.23            | 0.306                          | 1881.45            | 575.45             |
| A_68_P24877028 | chr6:137201005-137201049                          | NM_001164401:207   | Ptpro         | INSIDE                 | 0.489                                                        | 0.607                          | 2148.51            | 1304.75            | 0.297                          | 1693.93            | 502.81             |
| A_68_P23328515 | chr4:134990204-134990248                          | NM_022980:-506     | Recan3        | PROMOTER               | 0.489                                                        | 0.703                          | 1738.96            | 1222.08            | 0.344                          | 1410.08            | 484.53             |
| A_68_P20304095 | chr1:66747574-66747618                            | NM_025683:130      | Rpe           | INSIDE                 | 0.489                                                        | 0.364                          | 2463.11            | 897.32             | 0.178                          | 2142.67            | 381.80             |
| A_68_P21106251 | chr2:30822965-30823009                            | NM_144884:452      | Tor1a         | INSIDE                 | 0.489                                                        | 0.476                          | 3023.40            | 1439.48            | 0.233                          | 2264.47            | 527.50             |
| A_68_P24791281 | chr6:119057478-119057522                          | NM_001159533:707   | Caena1c       | INSIDE                 | 0.488                                                        | 0.454                          | 2298.28            | 1042.53            | 0.221                          | 1910.78            | 423.18             |
| A_68_P25533789 | chr7:139508721-139508765                          | NM_029935:96       | Chst15        | INSIDE                 | 0.488                                                        | 0.580                          | 1655.12            | 959.62             | 0.283                          | 1350.92            | 382.53             |
| A_68_P24619080 | chr6:87930668-87930712                            | NM_198622:786      | Hlfx          | INSIDE                 | 0.488                                                        | 0.604                          | 2033.85            | 1228.42            | 0.295                          | 1680.91            | 548.16             |
| A_68_P22388054 | chr3:103594799-103594843                          | NM_010432:378      | Hipk1         | INSIDE                 | 0.488                                                        | 0.404                          | 2251.66            | 909.39             | 0.197                          | 1777.28            | 350.43             |
| A_68_P29515925 | chr14:32978942-32978986                           | NM_019744:-13      | Ncoa4         | PROMOTER               | 0.488                                                        | 0.384                          | 1559.27            | 598.63             | 0.188                          | 1418.60            | 266.00             |
| A_68_P31625587 | chr18:36904013-36904057                           | NM_010885:168      | Ndufa2        | INSIDE                 | 0.488                                                        | 0.706                          | 2629.35            | 1855.44            | 0.344                          | 1958.35            | 674.10             |
| A_68_P20259229 | chr1:58561716-58561760                            | NM_001025378:-3478 | Orc2          | PROMOTER               | 0.488                                                        | 0.613                          | 1220.41            | 748.30             | 0.299                          | 1036.45            | 310.21             |
| A_68_P21580767 | chr2:121239698-121239742                          | NM_007952:83       | Pdia3         | INSIDE                 | 0.488                                                        | 0.464                          | 1856.14            | 861.06             | 0.226                          | 1526.10            | 345.63             |
| A_68_P27630335 | chr11:20101626-20101670                           | NM_008996:44       | Rab1          | INSIDE                 | 0.488                                                        | 0.626                          | 976.58             | 611.62             | 0.306                          | 867.42             | 265.32             |
| A_68_P28194541 | chr12:3309848-3309892                             | NM_016676:99       | Rab10         | INSIDE                 | 0.488                                                        | 0.569                          | 2174.95            | 1238.12            | 0.278                          | 1733.52            | 481.18             |
| A_68_P28280595 | chr12:21423493-21423537                           | NM_011739:-217     | Ywhaq         | PROMOTER               | 0.488                                                        | 0.524                          | 1861.72            | 976.25             | 0.256                          | 1439.01            | 368.48             |
| A_68_P21115063 | chr2:32237069-32237113                            | NM_198001:345      | 1110008P14Rik | INSIDE                 | 0.487                                                        | 0.635                          | 813.33             | 516.47             | 0.309                          | 625.13             | 193.40             |
| A_68_P21632193 | chr2:130732022-130732066                          | NR_015523:88       | A730017L22Rik | INSIDE                 | 0.487                                                        | 0.448                          | 1208.61            | 540.95             | 0.218                          | 986.16             | 214.80             |
| A_68_P25090210 | chr7:52184875-52184919                            | NM_001077264:-36   | Ap2a1         | PROMOTER               | 0.487                                                        | 0.497                          | 1125.86            | 559.74             | 0.242                          | 850.21             | 205.95             |
| A_68_P26834222 | chr9:112137879-112137923                          | NM_001177619:-555  | Arpp21        | PROMOTER               | 0.487                                                        | 0.497                          | 1421.06            | 705.74             | 0.242                          | 1267.75            | 306.45             |
| A_68_P31065259 | chr17:15512604-15512648                           | NM_007865:161      | Dhl1          | INSIDE                 | 0.487                                                        | 0.468                          | 1288.39            | 603.05             | 0.228                          | 926.33             | 211.00             |
| A_68_P31156012 | chr17:34974444-34974488                           | NM_001163770:503   | Dom3z         | INSIDE                 | 0.487                                                        | 0.622                          | 1713.07            | 1065.59            | 0.303                          | 1350.94            | 409.64             |
| A_68_P25020569 | chr7:28964516-28964561                            | NM_010092:26       | Dyrk1b        | INSIDE                 | 0.487                                                        | 0.644                          | 954.38             | 614.76             | 0.314                          | 868.98             | 272.77             |
| A_68_P32219573 | chr19:59534086-59534130                           | NM_010132:929      | Emx2          | INSIDE                 | 0.487                                                        | 0.383                          | 1447.80            | 554.09             | 0.186                          | 1176.86            | 219.13             |
| A_68_P31112795 | chr17:26986945-26986989                           | NM_008700:-8456    | Nkx2-5        | PROMOTER               | 0.487                                                        | 0.596                          | 1721.05            | 1025.00            | 0.290                          | 1291.32            | 374.77             |
| A_68_P21911590 | chr2:181335967-181336011                          | NM_133701:-35      | Prpf6         | DIVERGENT_PROMOTER     | 0.487                                                        | 0.665                          | 1374.26            | 913.55             | 0.324                          | 983.56             | 318.63             |
| A_68_P21105567 | chr2:30701245-30701289                            | NM_009116:380      | Prrx2         | INSIDE                 | 0.487                                                        | 0.536                          | 1063.78            | 569.84             | 0.261                          | 841.23             | 219.68             |
| A_68_P31207970 | chr17:46765913-46765957                           | NM_175168:519      | Ptk7          | INSIDE                 | 0.487                                                        | 0.587                          | 1359.07            | 797.16             | 0.286                          | 1009.10            | 288.38             |
| A_68_P27911821 | chr11:72302535-72302580                           | NM_153060:849      | Spns2         | INSIDE                 | 0.487                                                        | 0.643                          | 1352.13            | 869.12             | 0.313                          | 1065.32            | 333.18             |
| A_68_P28881306 | chr13:23515429-23515473                           | NM_013924:285      | Abt1          | INSIDE                 | 0.486                                                        | 0.501                          | 1304.49            | 654.11             | 0.244                          | 1021.46            | 249.03             |
| A_68_P28002760 | chr11:88725701-88725745                           | NM_001042541:178   | Akap1         | INSIDE                 | 0.486                                                        | 0.621                          | 1989.26            | 1234.52            | 0.302                          | 1676.77            | 505.57             |
| A_68_P27843668 | chr11:60351780-60351824                           | NM_172943:618      | Alkbh5        | INSIDE                 | 0.486                                                        | 0.593                          | 2332.94            | 1383.25            | 0.288                          | 1880.47            | 541.65             |
| A_68_P27750956 | chr11:43342693-43342737                           | NM_001045530:429   | Cenjl         | INSIDE                 | 0.486                                                        | 0.645                          | 2025.15            | 1305.63            | 0.313                          | 1622.45            | 508.59             |
| A_68_P32099207 | chr19:38129688-38129732                           | NM_001164362:179   | Cep55         | INSIDE                 | 0.486                                                        | 0.558                          | 1634.87            | 912.57             | 0.271                          | 1289.73            | 349.94             |
| A_68_P26001978 | chr8:83403405-83403452                            | NM_021356:950      | Gab1          | INSIDE                 | 0.486                                                        | 0.502                          | 1639.93            | 822.60             | 0.244                          | 1281.09            | 312.36             |

| ProbeName      | Target position of probe on CpG island microarray | TargetID               | GeneSymbol    | CpG island Description | Ratio of relative methylation (TiO <sub>2</sub> -NP/Vehicle) | Sham group                     |                    |                    | TiO <sub>2</sub> -H group      |                    |                    |
|----------------|---------------------------------------------------|------------------------|---------------|------------------------|--------------------------------------------------------------|--------------------------------|--------------------|--------------------|--------------------------------|--------------------|--------------------|
|                |                                                   |                        |               |                        |                                                              | Relative methylation (Cy5/Cy3) | Cy3 signal (Input) | Cy5 signal (MeDIP) | Relative methylation (Cy5/Cy3) | Cy3 signal (Input) | Cy5 signal (MeDIP) |
| A_68_P29034751 | chr13:51942528-51942572                           | NM_011817:507          | Gadd45g       | INSIDE                 | 0.486                                                        | 1.416                          | 11702.50           | 16567.28           | 0.689                          | 8042.87            | 5539.15            |
| A_68_P24864116 | chr6:134847884-134847928                          | NM_001167695:-73       | Gpr19         | PROMOTER               | 0.486                                                        | 0.427                          | 1300.51            | 555.03             | 0.207                          | 1069.51            | 221.73             |
| A_68_P24038672 | chr5:120882014-120882058                          | NM_008499:142          | Lhx5          | INSIDE                 | 0.486                                                        | 0.436                          | 1538.10            | 670.10             | 0.212                          | 1325.14            | 280.69             |
| A_68_P31934085 | chr19:6341468-6341512                             | NM_009006:241          | Map4k2        | INSIDE                 | 0.486                                                        | 0.671                          | 1478.67            | 992.70             | 0.326                          | 1237.50            | 403.43             |
| A_68_P21839459 | chr2:167924216-167924266                          | NM_021409:17737        | Pard6b        | INSIDE                 | 0.486                                                        | 3.416                          | 584.47             | 1996.35            | 1.659                          | 535.97             | 889.17             |
| A_68_P27647502 | chr11:23670649-23670693                           | NM_009044:300          | Rel           | INSIDE                 | 0.486                                                        | 0.652                          | 2102.83            | 1371.24            | 0.317                          | 1788.84            | 566.53             |
| A_68_P28988729 | chr13:43266743-43266787                           | NM_025935:-36          | Tbc1d7        | PROMOTER               | 0.486                                                        | 0.678                          | 1334.18            | 905.10             | 0.330                          | 1075.69            | 354.84             |
| A_68_P27273027 | chr10:77707175-77707219                           | NM_001081055:191       | Trappc10      | INSIDE                 | 0.486                                                        | 0.604                          | 988.87             | 596.80             | 0.293                          | 877.04             | 257.23             |
| A_68_P28599061 | chr12:85911065-85911109                           | NM_007701:285          | Vsx2          | INSIDE                 | 0.486                                                        | 0.611                          | 1566.71            | 957.78             | 0.297                          | 1357.31            | 403.32             |
| A_68_P30481998 | chr15:99556153-99556197                           | NM_183256:126          | 2310016M24Rik | INSIDE                 | 0.485                                                        | 0.664                          | 2354.99            | 1564.25            | 0.322                          | 1729.37            | 556.70             |
| A_68_P28187623 | chr11:120794145-120794189                         | NM_027745:20           | Ccdc57        | INSIDE                 | 0.485                                                        | 0.666                          | 1253.90            | 834.77             | 0.323                          | 1006.35            | 324.87             |
| A_68_P30895372 | chr16:78302001-78302045                           | NM_001025192:87        | Cxadr         | INSIDE                 | 0.485                                                        | 0.644                          | 1640.50            | 1056.16            | 0.312                          | 1285.44            | 401.09             |
| A_68_P28036958 | chr11:95006743-95006787                           | NM_007867:351          | Dlx4          | INSIDE                 | 0.485                                                        | 0.688                          | 4489.99            | 3088.20            | 0.334                          | 3238.82            | 1080.56            |
| A_68_P23395155 | chr4:147932643-147932687                          | NM_016699:129          | Exosc10       | INSIDE                 | 0.485                                                        | 0.586                          | 886.56             | 519.22             | 0.284                          | 766.71             | 217.58             |
| A_68_P25369176 | chr7:107855309-107855353                          | NM_178764:115          | Fam168a       | INSIDE                 | 0.485                                                        | 0.525                          | 1320.02            | 693.27             | 0.255                          | 1090.90            | 278.11             |
| A_68_P27077934 | chr10:39089328-39089372                           | NM_001122892:-254      | Fyn           | PROMOTER               | 0.485                                                        | 1.459                          | 9707.23            | 14159.60           | 0.708                          | 6682.81            | 4732.36            |
| A_68_P21929617 | chr3:7612894-7612938                              | NM_008371:511          | Ii7           | INSIDE                 | 0.485                                                        | 0.523                          | 1153.86            | 603.00             | 0.254                          | 1067.39            | 270.70             |
| A_68_P21812066 | chr2:163201241-163201292                          | NM_021566:22443        | Jph2          | INSIDE                 | 0.485                                                        | 1.413                          | 1545.63            | 2183.51            | 0.685                          | 1222.47            | 837.03             |
| A_68_P22139474 | chr3:52845318-52845362                            | NM_175386:-128         | Lhfp          | PROMOTER               | 0.485                                                        | 0.698                          | 2128.02            | 1485.84            | 0.339                          | 1611.47            | 545.91             |
| A_68_P24816270 | chr6:124613220-124613264                          | NM_145130:121          | Lpcat3        | INSIDE                 | 0.485                                                        | 0.680                          | 2281.06            | 1550.91            | 0.330                          | 1601.01            | 528.04             |
| A_68_P23361560 | chr4:140566716-140566760                          | NM_008546:187          | Mfap2         | INSIDE                 | 0.485                                                        | 0.496                          | 1156.20            | 573.98             | 0.241                          | 893.26             | 214.88             |
| A_68_P29613301 | chr14:55236421-55236465                           | NR_030457:-820         | Mir686        | PROMOTER               | 0.485                                                        | 0.633                          | 1569.75            | 994.38             | 0.307                          | 1231.88            | 378.47             |
| A_68_P25021608 | chr7:29178020-29178064                            | NM_019458:28           | Paf1          | INSIDE                 | 0.485                                                        | 0.602                          | 1810.55            | 1090.50            | 0.292                          | 1319.52            | 385.55             |
| A_68_P27288652 | chr10:80755895-80755939                           | NM_001146687:200       | Pip5k1c       | INSIDE                 | 0.485                                                        | 0.427                          | 2716.23            | 1159.04            | 0.207                          | 2212.44            | 458.22             |
| A_68_P25183345 | chr7:72672251-72672295                            |                        |               | Unknown                | 0.485                                                        | 0.748                          | 4782.02            | 3578.94            | 0.363                          | 3972.57            | 1441.72            |
| A_68_P26548608 | chr9:58402565-58402609                            | ENSMUST00000098676:-19 |               | PROMOTER               | 0.485                                                        | 0.413                          | 1333.16            | 550.07             | 0.200                          | 1058.15            | 211.61             |
| A_68_P27787100 | chr11:49988573-49988624                           | NM_026543:246          | 3010026O09Rik | INSIDE                 | 0.484                                                        | 0.595                          | 1168.90            | 695.64             | 0.288                          | 776.36             | 223.67             |
| A_68_P31158465 | chr17:35373569-35373613                           | NM_023179:50           | Atp6v1g2      | INSIDE                 | 0.484                                                        | 0.727                          | 2241.25            | 1630.25            | 0.352                          | 1591.45            | 560.35             |
| A_68_P28109102 | chr11:107655644-107655688                         | NM_019431:112          | Caeng4        | INSIDE                 | 0.484                                                        | 0.556                          | 1788.57            | 994.28             | 0.269                          | 1320.97            | 355.36             |
| A_68_P25565281 | chr7:144514141-144514185                          | NM_001113414:-8034     | Eb3           | PROMOTER               | 0.484                                                        | 0.643                          | 1717.13            | 1103.61            | 0.311                          | 1446.85            | 449.80             |
| A_68_P24115511 | chr5:135726586-135726630                          | NM_010246:309          | Fzd9          | INSIDE                 | 0.484                                                        | 0.470                          | 2130.42            | 1001.81            | 0.227                          | 1662.56            | 378.18             |
| A_68_P28452661 | chr12:56701135-56701179                           | NM_020287:1253         | Insm2         | INSIDE                 | 0.484                                                        | 0.448                          | 1892.63            | 848.42             | 0.217                          | 1554.72            | 336.97             |
| A_68_P23328805 | chr4:135050806-135050850                          | NM_028995:-409         | Nipal3        | DIVERGENT_PROMOTER     | 0.484                                                        | 0.603                          | 1098.79            | 663.09             | 0.292                          | 856.25             | 249.85             |
| A_68_P31311921 | chr17:67703645-67703689                           | NM_008984:133          | Ptpm          | INSIDE                 | 0.484                                                        | 0.637                          | 1627.31            | 1036.43            | 0.308                          | 1495.69            | 461.41             |
| A_68_P22281783 | chr3:82680573-82680617                            | NM_001146328:-189      | Rbm46         | PROMOTER               | 0.484                                                        | 1.399                          | 1858.55            | 2600.42            | 0.678                          | 1455.68            | 986.26             |
| A_68_P21835385 | chr2:167247037-167247081                          | NM_148929:-162         | Sle9a8        | PROMOTER               | 0.484                                                        | 0.664                          | 1773.84            | 1178.65            | 0.321                          | 1353.62            | 435.08             |
| A_68_P30544457 | chr16:10785415-10785459                           | NM_009896:193          | Socs1         | INSIDE                 | 0.484                                                        | 0.417                          | 2700.03            | 1126.63            | 0.202                          | 2124.78            | 428.99             |
| A_68_P24006041 | chr5:115224674-115224718                          | NR_027872:296          | 4930515G01Rik | INSIDE                 | 0.483                                                        | 0.522                          | 1829.39            | 954.87             | 0.252                          | 1493.79            | 376.31             |
| A_68_P30337992 | chr15:74394645-74394689                           | NM_174991:48041        | Bai1          | INSIDE                 | 0.483                                                        | 0.665                          | 1714.56            | 1140.18            | 0.321                          | 1333.96            | 428.37             |
| A_68_P26790786 | chr9:104164871-104164915                          | NM_001163026:368       | Dnajc13       | INSIDE                 | 0.483                                                        | 0.425                          | 1834.27            | 778.78             | 0.205                          | 1387.67            | 284.86             |
| A_68_P23597968 | chr5:35399719-35399763                            | NM_172708:8            | Dok7          | INSIDE                 | 0.483                                                        | 0.725                          | 1681.12            | 1218.03            | 0.350                          | 1334.37            | 466.66             |
| A_68_P20634005 | chr1:136453383-136453427                          | NM_152895:-3350        | Kdm5b         | DIVERGENT_PROMOTER     | 0.483                                                        | 0.595                          | 1761.01            | 1048.22            | 0.287                          | 1387.93            | 398.75             |
| A_68_P24979588 | chr7:16683856-16683900                            | NM_025898:-113         | Napa          | PROMOTER               | 0.483                                                        | 0.549                          | 1638.19            | 898.82             | 0.265                          | 1405.09            | 372.68             |
| A_68_P30397310 | chr15:8468678-84686823                            | NM_001081166:-241      | Phf21b        | PROMOTER               | 0.483                                                        | 0.691                          | 3869.34            | 2672.26            | 0.334                          | 2983.60            | 995.79             |
| A_68_P30497693 | chr15:102235932-102235976                         | NM_013672:-792         | Sp1           | PROMOTER               | 0.483                                                        | 0.563                          | 1706.22            | 960.11             | 0.272                          | 1277.79            | 347.43             |
| A_68_P22538542 | chr3:132347071-132347115                          | NM_173032:-15          | Tbck          | DIVERGENT_PROMOTER     | 0.483                                                        | 0.530                          | 2348.87            | 1245.55            | 0.256                          | 1857.29            | 475.36             |
| A_68_P26140912 | chr8:109207098-109207142                          | NM_173037:153          | Tmco7         | INSIDE                 | 0.483                                                        | 0.570                          | 1022.10            | 582.28             | 0.275                          | 966.40             | 266.05             |
| A_68_P31151137 | chr17:34077801-34077845                           | NM_020603:155          | Wdr46         | INSIDE                 | 0.483                                                        | 0.707                          | 1352.91            | 956.04             | 0.341                          | 1024.41            | 349.80             |
| A_68_P30762456 | chr16:52453372-52453416                           | NM_009655:-284         | Alcam         | PROMOTER               | 0.482                                                        | 0.403                          | 1841.83            | 741.46             | 0.194                          | 1337.84            | 259.65             |
| A_68_P23281852 | chr4:126430875-126430919                          | NM_133886:-117         | AU040320      | PROMOTER               | 0.482                                                        | 0.570                          | 2215.34            | 1261.74            | 0.275                          | 1570.02            | 431.24             |
| A_68_P29530302 | chr14:35315095-35315147                           | NM_009758:612          | Bmpr1a        | INSIDE                 | 0.482                                                        | 0.599                          | 1221.79            | 731.81             | 0.289                          | 1077.15            | 310.83             |

| ProbeName      | Target position of probe on CpG island microarray | TargetID                 | GeneSymbol     | CpG island Description | Ratio of relative methylation (TiO <sub>2</sub> -NP/Vehicle) | Sham group                     |                    |                    | TiO <sub>2</sub> -H group      |                    |                    |
|----------------|---------------------------------------------------|--------------------------|----------------|------------------------|--------------------------------------------------------------|--------------------------------|--------------------|--------------------|--------------------------------|--------------------|--------------------|
|                |                                                   |                          |                |                        |                                                              | Relative methylation (Cy5/Cy3) | Cy3 signal (Input) | Cy5 signal (MeDIP) | Relative methylation (Cy5/Cy3) | Cy3 signal (Input) | Cy5 signal (MeDIP) |
| A_68_P26825042 | chr9:110559281-110559325                          | NM_028312:296            | Ccdc12         | INSIDE                 | 0.482                                                        | 0.617                          | 2313.78            | 1428.18            | 0.297                          | 1753.97            | 521.53             |
| A_68_P21762928 | chr2:154718164-154718208                          | NM_026030:456            | Eif2s2         | INSIDE                 | 0.482                                                        | 0.521                          | 3504.72            | 1826.80            | 0.251                          | 2641.39            | 663.62             |
| A_68_P25394534 | chr7:112959304-112959348                          | NM_025301:275            | Mrp117         | INSIDE                 | 0.482                                                        | 0.653                          | 1215.91            | 794.16             | 0.315                          | 937.64             | 295.07             |
| A_68_P27921011 | chr11:74336607-74336651                           | NM_001015046:67032       | Rap1gap2       | INSIDE                 | 0.482                                                        | 0.673                          | 3342.51            | 2250.51            | 0.324                          | 2475.59            | 802.64             |
| A_68_P22312701 | chr3:88044948-88044992                            | NM_021375:13636          | Rhbg           | DOWNSTREAM             | 0.482                                                        | 0.400                          | 1768.14            | 707.26             | 0.193                          | 1340.77            | 258.59             |
| A_68_P30377732 | chr15:81229723-81229767                           | NM_133726:380            | Str13          | INSIDE                 | 0.482                                                        | 0.642                          | 1394.93            | 895.13             | 0.309                          | 1246.24            | 385.22             |
| A_68_P23316765 | chr4:132833435-132833480                          | NM_025667:248            | Tmem222        | INSIDE                 | 0.482                                                        | 0.581                          | 2523.92            | 1466.58            | 0.280                          | 2020.68            | 566.19             |
| A_68_P22145981 | chr3:53959830-53959874                            | NM_016984:-173           | Trpc4          | PROMOTER               | 0.482                                                        | 0.592                          | 1367.19            | 808.74             | 0.285                          | 1112.73            | 317.09             |
| A_68_P29256601 | chr13:99032893-99032937                           | NM_178918:33             | Utp15          | INSIDE                 | 0.482                                                        | 0.569                          | 2426.49            | 1380.02            | 0.274                          | 1982.66            | 543.99             |
| A_68_P27095961 | chr10:42351968-42352012                           | ENSMUST00000144806:48347 |                | INSIDE                 | 0.482                                                        | 0.711                          | 1303.14            | 927.00             | 0.343                          | 1092.05            | 374.44             |
| A_68_P28450732 | chr12:56225370-56225414                           | NM_001100116:-122        | 1700047117Rik2 | PROMOTER               | 0.481                                                        | 0.695                          | 1744.69            | 1213.31            | 0.334                          | 1633.27            | 545.84             |
| A_68_P27282598 | chr10:79804958-79805002                           | NM_001113548:6211        | Adams15        | INSIDE                 | 0.481                                                        | 0.428                          | 1589.39            | 680.46             | 0.206                          | 1199.97            | 247.28             |
| A_68_P27171935 | chr10:59465906-59465950                           | NM_025514:-68            | Anapc16        | DIVERGENT_PROMOTER     | 0.481                                                        | 0.501                          | 2530.57            | 1266.60            | 0.241                          | 2123.48            | 510.99             |
| A_68_P20455320 | chr1:95297981-95298025                            | NM_207031:27530          | Ano7           | INSIDE                 | 0.481                                                        | 0.652                          | 1115.64            | 727.50             | 0.313                          | 903.76             | 283.23             |
| A_68_P24798783 | chr6:120443507-120443551                          | NM_033567:297            | Cecr6          | INSIDE                 | 0.481                                                        | 0.454                          | 2166.85            | 982.79             | 0.218                          | 1678.62            | 366.17             |
| A_68_P22861616 | chr4:412617244-41261768                           | NM_026893:188            | Dcaf12         | INSIDE                 | 0.481                                                        | 0.699                          | 1489.47            | 1040.41            | 0.336                          | 1226.08            | 411.88             |
| A_68_P30746980 | chr16:49699315-49699359                           | NM_028680:-70            | Ift57          | PROMOTER               | 0.481                                                        | 0.699                          | 3152.72            | 2204.33            | 0.336                          | 2447.18            | 822.39             |
| A_68_P20938882 | chr1:193399613-193399657                          | NM_178632:22             | Ints7          | INSIDE                 | 0.481                                                        | 0.496                          | 1494.60            | 741.54             | 0.239                          | 1079.60            | 257.53             |
| A_68_P20806524 | chr1:169619169-169619217                          | NM_033652:-496           | Lmx1a          | PROMOTER               | 0.481                                                        | 0.492                          | 1224.37            | 602.89             | 0.237                          | 1036.42            | 245.71             |
| A_68_P21614450 | chr2:127413402-127413446                          | NM_029963:263            | Mrps5          | INSIDE                 | 0.481                                                        | 0.702                          | 1575.99            | 1106.42            | 0.337                          | 1167.14            | 393.86             |
| A_68_P20164271 | chr1:39251178-39251222                            | NM_008719:84             | Npas2          | INSIDE                 | 0.481                                                        | 0.378                          | 2295.88            | 868.81             | 0.182                          | 1697.49            | 309.03             |
| A_68_P26268778 | chr8:130882433-130882477                          | NM_008737:-518           | Nrp1           | PROMOTER               | 0.481                                                        | 0.712                          | 1356.25            | 965.21             | 0.342                          | 1017.05            | 347.82             |
| A_68_P21706649 | chr2:144157501-144157545                          | NM_152947:-424           | Ovol2          | PROMOTER               | 0.481                                                        | 0.484                          | 1533.54            | 742.41             | 0.233                          | 1176.65            | 273.94             |
| A_68_P28458266 | chr12:57793635-57793679                           | NM_011041:-2969          | Pax9           | PROMOTER               | 0.481                                                        | 0.582                          | 1359.23            | 791.15             | 0.280                          | 1150.77            | 322.38             |
| A_68_P28549419 | chr12:76697049-76697093                           | NM_012024:117            | Ppp2r5e        | INSIDE                 | 0.481                                                        | 0.664                          | 5537.38            | 3677.83            | 0.319                          | 3978.85            | 1271.15            |
| A_68_P31108130 | chr17:26205973-26206017                           | NM_001162868:128         | Rab11fip3      | INSIDE                 | 0.481                                                        | 0.682                          | 2004.10            | 1366.87            | 0.328                          | 1539.18            | 505.40             |
| A_68_P29011800 | chr13:47218349-47218393                           | NM_146042:282            | Rnf144b        | INSIDE                 | 0.481                                                        | 0.690                          | 1064.79            | 735.20             | 0.332                          | 727.15             | 241.26             |
| A_68_P25507247 | chr7:134920536-134920580                          | NM_178029:-344           | Setd1a         | PROMOTER               | 0.481                                                        | 0.341                          | 3262.41            | 1113.63            | 0.164                          | 2654.59            | 435.65             |
| A_68_P20878657 | chr1:182873054-182873098                          | NM_144794:428            | Tmem63a        | INSIDE                 | 0.481                                                        | 0.689                          | 1123.22            | 773.44             | 0.331                          | 846.78             | 280.24             |
| A_68_P24431874 | chr6:49213690-49213734                            | NM_198102:339            | Tra2a          | INSIDE                 | 0.481                                                        | 0.437                          | 2489.43            | 1086.95            | 0.210                          | 1956.38            | 410.72             |
| A_68_P23339580 | chr4:136944275-136944319                          | ENSMUST00000078305:-6911 |                | PROMOTER               | 0.481                                                        | 0.401                          | 1933.98            | 775.16             | 0.193                          | 1422.75            | 274.21             |
| A_68_P20140038 | chr1:34735220-34735264                            | ENSMUST00000159326:210   |                | INSIDE                 | 0.481                                                        | 0.573                          | 1164.49            | 667.48             | 0.276                          | 931.28             | 256.86             |
| A_68_P25677406 | chr8:14911525-14911569                            | NM_001037736:-170        | Arhgef10       | PROMOTER               | 0.480                                                        | 0.642                          | 1548.94            | 993.75             | 0.308                          | 1391.38            | 428.63             |
| A_68_P25948511 | chr8:72409941-72409985                            | NM_026818:1329           | Cilp2          | INSIDE                 | 0.480                                                        | 0.526                          | 1118.11            | 587.97             | 0.253                          | 865.18             | 218.55             |
| A_68_P30230393 | chr15:54944017-54944061                           | NM_145470:1              | Deptor         | INSIDE                 | 0.480                                                        | 0.550                          | 2257.27            | 1242.03            | 0.264                          | 1758.95            | 464.63             |
| A_68_P26467019 | chr9:44135043-44135087                            | NM_007875:137            | Dpagt1         | INSIDE                 | 0.480                                                        | 0.539                          | 1362.77            | 734.99             | 0.259                          | 1126.21            | 291.65             |
| A_68_P28186830 | chr11:120657372-120657416                         | NM_026824:315            | Dus11          | INSIDE                 | 0.480                                                        | 0.659                          | 2813.60            | 1854.72            | 0.316                          | 2222.26            | 702.91             |
| A_68_P20456054 | chr1:95408480-95408524                            | NM_145519:-178           | Farp2          | PROMOTER               | 0.480                                                        | 0.465                          | 1324.72            | 616.09             | 0.223                          | 1060.35            | 236.71             |
| A_68_P32140226 | chr19:45817015-45817059                           | NM_001166361:338         | Fgf8           | INSIDE                 | 0.480                                                        | 0.537                          | 1065.37            | 572.62             | 0.258                          | 836.27             | 215.78             |
| A_68_P26374353 | chr9:26962841-26962885                            | NM_023277:144            | Jam3           | INSIDE                 | 0.480                                                        | 0.597                          | 940.40             | 561.62             | 0.287                          | 786.31             | 225.60             |
| A_68_P30575506 | chr16:17759553-17759597                           | NM_145479:-139           | Kihl22         | PROMOTER               | 0.480                                                        | 0.679                          | 1589.70            | 1079.12            | 0.326                          | 1274.65            | 415.05             |
| A_68_P25015935 | chr7:27963726-27963770                            | NR_037283:-2636          | Mir3101        | PROMOTER               | 0.480                                                        | 0.709                          | 1802.20            | 1277.94            | 0.341                          | 1472.34            | 501.47             |
| A_68_P20184671 | chr1:42754188-42754232                            | NM_008900:220            | Pou3f3         | INSIDE                 | 0.480                                                        | 0.646                          | 959.00             | 619.22             | 0.310                          | 929.95             | 288.27             |
| A_68_P29094168 | chr13:63665973-63666017                           | NM_008957:834            | Ptch1          | INSIDE                 | 0.480                                                        | 0.677                          | 1363.51            | 922.75             | 0.325                          | 1064.54            | 345.90             |
| A_68_P30578596 | chr16:18249157-18249201                           | NM_001080999:203         | Trmt2a         | INSIDE                 | 0.480                                                        | 0.671                          | 1791.48            | 1202.58            | 0.322                          | 1420.71            | 457.65             |
| A_68_P28072252 | chr11:101017412-101017456                         | NM_134028:237            | Tubg2          | INSIDE                 | 0.480                                                        | 0.569                          | 1803.32            | 1026.03            | 0.273                          | 1412.35            | 385.83             |
| A_68_P21579349 | chr2:120996373-120996418                          | NM_178889:490            | Zscan29        | INSIDE                 | 0.480                                                        | 0.666                          | 1797.60            | 1197.59            | 0.320                          | 1294.63            | 413.66             |
| A_68_P25007467 | chr7:25729309-25729353                            |                          | Unknown        |                        | 0.480                                                        | 0.547                          | 2520.07            | 1379.55            | 0.263                          | 1841.60            | 483.62             |
| A_68_P28976947 | chr13:41345064-41345108                           | NM_001135577:-126        | BC024659       | PROMOTER               | 0.479                                                        | 0.526                          | 2012.27            | 1059.02            | 0.252                          | 1435.63            | 361.73             |
| A_68_P31152223 | chr17:34257573-34257617                           | NR_037970:-749           | Brd2           | PROMOTER               | 0.479                                                        | 0.648                          | 2483.84            | 1609.22            | 0.310                          | 1780.17            | 552.63             |
| A_68_P23448645 | chr5:4104155-4104199                              | NM_020010:521            | Cyp51          | INSIDE                 | 0.479                                                        | 0.667                          | 1310.96            | 874.53             | 0.319                          | 1029.64            | 328.77             |

| ProbeName      | Target position of probe on CpG island microarray | TargetID           | GeneSymbol | CpG island Description | Ratio of relative methylation (TiO <sub>2</sub> -NP/Vehicle) | Sham group                     |                    |                    | TiO <sub>2</sub> -H group      |                    |                    |
|----------------|---------------------------------------------------|--------------------|------------|------------------------|--------------------------------------------------------------|--------------------------------|--------------------|--------------------|--------------------------------|--------------------|--------------------|
|                |                                                   |                    |            |                        |                                                              | Relative methylation (Cy5/Cy3) | Cy3 signal (Input) | Cy5 signal (MeDIP) | Relative methylation (Cy5/Cy3) | Cy3 signal (Input) | Cy5 signal (MeDIP) |
| A_68_P28576810 | chr12:81744684-81744728                           | NM_007951:142      | Erh        | INSIDE                 | 0.479                                                        | 0.739                          | 3291.02            | 2433.20            | 0.354                          | 2654.68            | 939.45             |
| A_68_P31876066 | chr18:82575283-82575327                           | NM_008082:865      | Galr1      | INSIDE                 | 0.479                                                        | 0.483                          | 2065.44            | 997.01             | 0.231                          | 1600.25            | 370.27             |
| A_68_P23165464 | chr4:102986645-102986689                          | NM_025909:216      | Oma1       | INSIDE                 | 0.479                                                        | 0.613                          | 996.25             | 610.96             | 0.294                          | 859.86             | 252.48             |
| A_68_P25666157 | chr8:13105151-13105195                            | NM_178708:171      | Pcid2      | INSIDE                 | 0.479                                                        | 0.530                          | 1273.97            | 675.04             | 0.254                          | 1099.59            | 279.25             |
| A_68_P25614335 | chr8:3515288-3515332                              | NM_001122818:-73   | Pnpla6     | PROMOTER               | 0.479                                                        | 0.619                          | 2298.49            | 1423.24            | 0.297                          | 1726.09            | 512.10             |
| A_68_P28059432 | chr11:98798988-98799032                           | NM_001177302:-21   | Rara       | PROMOTER               | 0.479                                                        | 0.604                          | 1672.00            | 1009.06            | 0.289                          | 1168.93            | 337.96             |
| A_68_P32599603 | chrX:108577244-108577288                          | NM_025949:74288    | Rps6ka6    | INSIDE                 | 0.479                                                        | 0.559                          | 1003.25            | 560.77             | 0.268                          | 437.18             | 117.08             |
| A_68_P22286850 | chr3:83570771-83570815                            | NM_009144:550      | Sfrp2      | INSIDE                 | 0.479                                                        | 0.595                          | 1282.53            | 762.50             | 0.285                          | 914.27             | 260.51             |
| A_68_P28344354 | chr12:34642575-34642619                           | NM_011658:61       | Twist1     | INSIDE                 | 0.479                                                        | 0.582                          | 2241.59            | 1305.33            | 0.279                          | 1874.20            | 522.72             |
| A_68_P30471849 | chr15:97739034-97739078                           | NM_009504:-329     | Vdr        | PROMOTER               | 0.479                                                        | 0.585                          | 1964.43            | 1148.28            | 0.280                          | 1583.43            | 443.33             |
| A_68_P31149741 | chr17:33766122-33766166                           | NM_026712:108      | Zfp414     | INSIDE                 | 0.479                                                        | 0.612                          | 906.13             | 554.98             | 0.294                          | 758.17             | 222.56             |
| A_68_P24037871 | chr5:120752306-120752350                          |                    |            | Unknown                | 0.479                                                        | 0.679                          | 1497.79            | 1017.36            | 0.326                          | 1161.83            | 378.34             |
| A_68_P29672920 | chr14:65962654-65962698                           | AK028094:17509     |            | DOWNSTREAM             | 0.479                                                        | 0.494                          | 1747.19            | 863.93             | 0.237                          | 1355.93            | 321.23             |
| A_68_P20447498 | chr1:94077040-94077084                            | AK155250:-144      |            | PROMOTER               | 0.479                                                        | 0.560                          | 2293.44            | 1283.74            | 0.268                          | 1734.42            | 464.74             |
| A_68_P27958467 | chr11:80965329-80965373                           | NM_007384:1055     | Acen1      | INSIDE                 | 0.478                                                        | 0.656                          | 1189.57            | 779.90             | 0.313                          | 1067.78            | 334.62             |
| A_68_P30673619 | chr16:36072197-36072241                           | NM_001159422:-9142 | Ccdc58     | PROMOTER               | 0.478                                                        | 0.554                          | 1163.45            | 644.47             | 0.265                          | 915.06             | 242.18             |
| A_68_P28732710 | chr12:110691897-110691941                         | NM_001190703:254   | Dlk1       | INSIDE                 | 0.478                                                        | 0.502                          | 2056.95            | 1033.52            | 0.240                          | 1542.30            | 370.33             |
| A_68_P29631501 | chr14:58694549-58694593                           | NM_013518:3048     | Fgf9       | INSIDE                 | 0.478                                                        | 0.378                          | 1966.29            | 743.61             | 0.181                          | 1526.29            | 276.13             |
| A_68_P29034755 | chr13:51943120-51943164                           | NM_011817:1099     | Gadd45g    | INSIDE                 | 0.478                                                        | 0.402                          | 1902.56            | 765.41             | 0.192                          | 1503.63            | 288.92             |
| A_68_P20644872 | chr1:138156299-138156343                          | NM_001101516:1130  | Gpr25      | INSIDE                 | 0.478                                                        | 0.513                          | 1269.17            | 650.55             | 0.245                          | 954.00             | 233.70             |
| A_68_P27280641 | chr10:79516441-79516485                           | NM_001037741:-319  | Gpx4       | PROMOTER               | 0.478                                                        | 0.502                          | 2844.34            | 1428.39            | 0.240                          | 1949.29            | 468.24             |
| A_68_P26526554 | chr9:54434551-54434595                            | NM_029573:255      | Idh3a      | INSIDE                 | 0.478                                                        | 0.328                          | 1901.35            | 623.56             | 0.157                          | 1481.35            | 232.28             |
| A_68_P31622626 | chr18:36356438-36356482                           | NM_001167891:354   | Nrg2       | INSIDE                 | 0.478                                                        | 0.582                          | 1174.01            | 683.70             | 0.279                          | 994.54             | 277.10             |
| A_68_P31303253 | chr17:66234412-66234456                           | NM_001198949:-171  | Ralbp1     | PROMOTER               | 0.478                                                        | 0.647                          | 1063.99            | 688.12             | 0.309                          | 889.87             | 274.93             |
| A_68_P26316371 | chr9:14080770-14080814                            | NM_030261:48       | Sesn3      | INSIDE                 | 0.478                                                        | 0.559                          | 1900.92            | 1061.75            | 0.267                          | 1585.58            | 423.54             |
| A_68_P31487968 | chr18:10030044-10030088                           | NM_001038589:81    | Usp14      | INSIDE                 | 0.478                                                        | 0.718                          | 2964.47            | 2127.98            | 0.343                          | 2212.20            | 758.69             |
| A_68_P26494989 | chr9:48793954-48794001                            | NM_175482:488      | Usp28      | INSIDE                 | 0.478                                                        | 0.544                          | 958.06             | 521.24             | 0.260                          | 769.11             | 199.94             |
| A_68_P29961944 | chr14:122875451-122875495                         | NM_009574:867      | Zic2       | INSIDE                 | 0.478                                                        | 0.595                          | 2523.21            | 1501.09            | 0.284                          | 1988.30            | 565.48             |
| A_68_P26448727 | chr9:41184693-41184737                            | AK081773:-5916     |            | PROMOTER               | 0.478                                                        | 0.417                          | 2003.36            | 836.30             | 0.200                          | 1502.34            | 300.04             |
| A_68_P26074974 | chr8:96535812-96535856                            | NM_011787:706      | Amfr       | INSIDE                 | 0.477                                                        | 0.589                          | 2100.45            | 1236.68            | 0.281                          | 1586.27            | 445.93             |
| A_68_P31058439 | chr17:14340006-14340050                           | NM_172826:810      | Dact2      | INSIDE                 | 0.477                                                        | 0.524                          | 1451.59            | 760.53             | 0.250                          | 1301.74            | 325.01             |
| A_68_P23227292 | chr4:115689902-115689946                          | NM_010173:583      | Faah       | INSIDE                 | 0.477                                                        | 0.496                          | 1430.53            | 709.23             | 0.236                          | 1154.19            | 272.86             |
| A_68_P21485377 | chr2:103601079-103601123                          | NM_153126:307      | Nat10      | INSIDE                 | 0.477                                                        | 0.590                          | 1023.16            | 603.68             | 0.281                          | 767.63             | 216.03             |
| A_68_P29275477 | chr13:102537731-102537775                         | NM_001077495:420   | Pik3r1     | INSIDE                 | 0.477                                                        | 0.489                          | 1109.14            | 542.56             | 0.233                          | 910.65             | 212.37             |
| A_68_P21813660 | chr2:163484302-163484346                          | NM_001164053:131   | Pkig       | INSIDE                 | 0.477                                                        | 0.560                          | 986.37             | 552.78             | 0.267                          | 905.78             | 242.04             |
| A_68_P27841324 | chr11:59989338-59989382                           | NM_001037764:35777 | Rai1       | INSIDE                 | 0.477                                                        | 0.623                          | 1199.73            | 746.89             | 0.297                          | 978.58             | 290.76             |
| A_68_P22165085 | chr3:57539702-57539746                            | NM_011883:-263     | Rnf13      | PROMOTER               | 0.477                                                        | 0.526                          | 2000.56            | 1052.59            | 0.251                          | 1715.08            | 430.87             |
| A_68_P27877798 | chr11:66340379-66340423                           | NM_001034874:-772  | Shisa6     | PROMOTER               | 0.477                                                        | 0.563                          | 2271.08            | 1279.17            | 0.269                          | 1743.23            | 468.57             |
| A_68_P28671225 | chr12:99866511-99866555                           | NM_178914:139      | Spata7     | INSIDE                 | 0.477                                                        | 0.714                          | 2053.80            | 1466.08            | 0.341                          | 1525.59            | 519.84             |
| A_68_P29856116 | chr14:102053116-102053160                         | NM_016723:-45      | Uchl3      | PROMOTER               | 0.477                                                        | 0.678                          | 1252.29            | 848.85             | 0.303                          | 1035.20            | 334.63             |
| A_68_P28694455 | chr12:104187509-104187553                         | NM_001081017:462   | Unc79      | INSIDE                 | 0.477                                                        | 0.648                          | 1703.01            | 1103.15            | 0.309                          | 1328.01            | 409.98             |
| A_68_P30141816 | chr15:36937216-36937260                           | NM_026521:-81      | Zfp706     | PROMOTER               | 0.477                                                        | 0.588                          | 2500.93            | 1471.67            | 0.281                          | 1874.31            | 526.37             |
| A_68_P27083323 | chr10:40020837-40020881                           | NM_007444:1134     | Amd2       | INSIDE                 | 0.476                                                        | 0.678                          | 1594.46            | 1081.77            | 0.323                          | 1282.78            | 414.38             |
| A_68_P24115153 | chr5:135663286-135663330                          | NM_011714:116      | Baz1b      | INSIDE                 | 0.476                                                        | 0.659                          | 1057.98            | 697.28             | 0.314                          | 927.00             | 290.73             |
| A_68_P27272488 | chr10:77632611-77632655                           | NM_138601:-119     | D10Jhu81e  | PROMOTER               | 0.476                                                        | 0.523                          | 1479.67            | 774.53             | 0.249                          | 1114.96            | 277.98             |
| A_68_P21603036 | chr2:125331219-125331263                          | NM_007993:934      | Fbn1       | INSIDE                 | 0.476                                                        | 0.657                          | 935.55             | 614.36             | 0.313                          | 779.93             | 243.78             |
| A_68_P31422103 | chr17:87665170-87665214                           | NM_139295:95       | Mcfid2     | INSIDE                 | 0.476                                                        | 0.560                          | 4201.84            | 2354.54            | 0.267                          | 2989.83            | 797.80             |
| A_68_P29453022 | chr14:22318726-22318770                           | NM_001205241:-243  | Myst4      | PROMOTER               | 0.476                                                        | 0.652                          | 2715.22            | 1769.97            | 0.310                          | 2259.17            | 700.97             |
| A_68_P22872799 | chr4:43644616-43644660                            | NM_173788:-168     | Npr2       | PROMOTER               | 0.476                                                        | 1.511                          | 3992.20            | 6032.33            | 0.719                          | 2609.02            | 1875.02            |
| A_68_P24950541 | chr7:4744529-4744573                              | NM_009081:-16      | Rpl28      | DIVERGENT_PROMOTER     | 0.476                                                        | 0.725                          | 1844.12            | 1336.34            | 0.345                          | 1373.30            | 474.08             |
| A_68_P20191089 | chr1:43884192-43884236                            | NM_026430:339      | Uxs1       | INSIDE                 | 0.476                                                        | 0.662                          | 867.69             | 574.69             | 0.315                          | 768.64             | 242.48             |

| ProbeName      | Target position of probe on CpG island microarray | TargetID                | GeneSymbol    | CpG island Description | Ratio of relative methylation (TiO <sub>2</sub> -NP/Vehicle) | Sham group                     |                    |                    | TiO <sub>2</sub> -H group      |                    |                    |
|----------------|---------------------------------------------------|-------------------------|---------------|------------------------|--------------------------------------------------------------|--------------------------------|--------------------|--------------------|--------------------------------|--------------------|--------------------|
|                |                                                   |                         |               |                        |                                                              | Relative methylation (Cy5/Cy3) | Cy3 signal (Input) | Cy5 signal (MeDIP) | Relative methylation (Cy5/Cy3) | Cy3 signal (Input) | Cy5 signal (MeDIP) |
| A_68_P24760554 | chr6:113574432-113574476                          | NM_009507:440           | Vhl           | INSIDE                 | 0.476                                                        | 0.671                          | 2660.19            | 1784.19            | 0.319                          | 2034.11            | 649.02             |
| A_68_P22964960 | chr4:62186324-62186371                            | NM_177607:-55           | 4933430117Rik | DIVERGENT_PROMOTER     | 0.475                                                        | 0.529                          | 1219.13            | 644.59             | 0.251                          | 848.41             | 212.90             |
| A_68_P30459963 | chr15:95621546-95621590                           | NM_175344:295           | Ano6          | INSIDE                 | 0.475                                                        | 0.516                          | 2300.58            | 1186.50            | 0.245                          | 1680.35            | 411.74             |
| A_68_P29144944 | chr13:74346071-74346115                           | NM_177333:56            | Exoc3         | INSIDE                 | 0.475                                                        | 0.623                          | 3066.97            | 1910.91            | 0.296                          | 2497.47            | 739.39             |
| A_68_P31106388 | chr17:25946298-25946342                           | NM_001164225:291        | Fbx116        | INSIDE                 | 0.475                                                        | 0.688                          | 1554.55            | 1069.98            | 0.327                          | 1248.05            | 407.99             |
| A_68_P20826007 | chr1:172995883-172995927                          | NM_010188:-6370         | Fcgr3         | PROMOTER               | 0.475                                                        | 0.324                          | 7844.01            | 2538.94            | 0.154                          | 6645.24            | 1021.34            |
| A_68_P28137853 | chr11:112646459-112646503                         | NM_011448:2957          | Sox9          | INSIDE                 | 0.475                                                        | 0.635                          | 5799.83            | 3681.65            | 0.302                          | 4110.70            | 1239.86            |
| A_68_P24459344 | chr6:53769514-53769558                            | NM_025817:1283          | Tril          | INSIDE                 | 0.475                                                        | 1.411                          | 4056.02            | 5722.18            | 0.670                          | 2907.24            | 1947.23            |
| A_68_P21115067 | chr2:32237497-32237541                            | NM_198001:-83           | 1110008P14Rik | PROMOTER               | 0.474                                                        | 0.452                          | 3164.68            | 1431.07            | 0.215                          | 2248.98            | 482.49             |
| A_68_P25539028 | chr7:140316412-140316456                          | NM_009980:-1268         | Ctbp2         | PROMOTER               | 0.474                                                        | 0.420                          | 1352.64            | 568.73             | 0.199                          | 1173.11            | 233.91             |
| A_68_P24533914 | chr6:70907055-70907100                            | NM_001101464:478        | Foxi3         | INSIDE                 | 0.474                                                        | 0.616                          | 1034.28            | 637.53             | 0.292                          | 821.83             | 240.22             |
| A_68_P32117486 | chr19:41921651-41921695                           | NM_177603:950           | Frat2         | INSIDE                 | 0.474                                                        | 0.525                          | 2050.18            | 1075.58            | 0.249                          | 1582.09            | 393.70             |
| A_68_P25350314 | chr7:104548897-104548941                          | NM_024220:406           | Ndufc2        | INSIDE                 | 0.474                                                        | 0.708                          | 1873.10            | 1326.63            | 0.336                          | 1456.45            | 488.82             |
| A_68_P20961506 | chr2:3200909-3200953                              | NM_008708:-629          | Nmt2          | PROMOTER               | 0.474                                                        | 0.537                          | 1726.64            | 927.27             | 0.255                          | 1287.86            | 328.03             |
| A_68_P30422878 | chr15:88898359-88898403                           | NM_001002005:8225       | Panx2         | INSIDE                 | 0.474                                                        | 2.966                          | 1936.80            | 5744.91            | 1.406                          | 1405.19            | 1975.56            |
| A_68_P24123993 | chr5:137463233-137463277                          | NM_011962:366           | Plod3         | INSIDE                 | 0.474                                                        | 0.553                          | 1095.74            | 606.16             | 0.262                          | 781.43             | 204.85             |
| A_68_P24462649 | chr6:54277015-54277059                            | NM_030024:31            | Prr15         | INSIDE                 | 0.474                                                        | 0.460                          | 1777.85            | 817.43             | 0.218                          | 1426.55            | 311.18             |
| A_68_P31024853 | chr17:7374468-7374512                             | NM_011299:27            | Rps6ka2       | INSIDE                 | 0.474                                                        | 0.528                          | 1322.33            | 697.66             | 0.250                          | 1141.11            | 285.31             |
| A_68_P31857881 | chr18:79305640-79305684                           | NM_053099:468           | Setbp1        | INSIDE                 | 0.474                                                        | 0.628                          | 5152.73            | 3235.64            | 0.298                          | 3688.43            | 1097.86            |
| A_68_P27750513 | chr11:43247484-43247528                           | NM_148673:274           | Slu7          | INSIDE                 | 0.474                                                        | 0.604                          | 1473.17            | 889.54             | 0.286                          | 1210.37            | 346.10             |
| A_68_P31104790 | chr17:25707537-25707581                           | NM_011447:73            | Sox8          | INSIDE                 | 0.474                                                        | 0.513                          | 1839.25            | 943.00             | 0.243                          | 1423.75            | 346.34             |
| A_68_P31930506 | chr19:5731655-5731699                             | NM_020491:45            | Ssca1         | INSIDE                 | 0.474                                                        | 0.485                          | 2931.98            | 1423.06            | 0.230                          | 2146.46            | 493.78             |
| A_68_P26431942 | chr9:37464709-37464753                            | NM_025289:167           | Tbrg1         | INSIDE                 | 0.474                                                        | 0.558                          | 919.30             | 513.02             | 0.265                          | 693.35             | 183.39             |
| A_68_P29508103 | chr14:31638633-31638679                           | NM_028839:-123          | Tmem110       | PROMOTER               | 0.474                                                        | 0.641                          | 1383.44            | 886.42             | 0.304                          | 1115.78            | 338.92             |
| A_68_P24327619 | chr6:29559522-29559566                            | NM_177296:63            | Tnpo3         | INSIDE                 | 0.474                                                        | 0.545                          | 1375.40            | 749.19             | 0.258                          | 1119.01            | 289.03             |
| A_68_P31156341 | chr17:35031034-35031078                           | NM_198886:-447          | Zbtb12        | PROMOTER               | 0.474                                                        | 0.628                          | 960.50             | 602.87             | 0.297                          | 786.37             | 233.74             |
| A_68_P22691831 | chr4:3158152-3158196                              |                         |               | Unknown                | 0.474                                                        | 0.444                          | 1492.57            | 662.67             | 0.210                          | 1442.86            | 303.53             |
| A_68_P21840494 | chr2:168106782-168106826                          | ENSMUST00000109191:-172 |               | PROMOTER               | 0.474                                                        | 0.613                          | 4148.95            | 2543.21            | 0.291                          | 3278.74            | 952.99             |
| A_68_P24541217 | chr6:72297432-72297476                            | NM_026696:144           | 0610030E20Rik | INSIDE                 | 0.473                                                        | 0.544                          | 1173.35            | 638.12             | 0.257                          | 961.45             | 247.19             |
| A_68_P32053384 | chr19:29596371-29596418                           | NR_015567:83            | A930007119Rik | INSIDE                 | 0.473                                                        | 0.570                          | 972.26             | 554.23             | 0.269                          | 784.74             | 211.41             |
| A_68_P28836401 | chr13:14047360-14047404                           | NM_178640:442           | B3galnt2      | INSIDE                 | 0.473                                                        | 0.498                          | 1672.03            | 833.04             | 0.236                          | 1311.99            | 308.99             |
| A_68_P28962018 | chr13:38750527-38750572                           | NM_025380:348           | Eef1e1        | INSIDE                 | 0.473                                                        | 0.529                          | 1293.25            | 684.71             | 0.250                          | 1003.15            | 251.03             |
| A_68_P25957748 | chr8:74126235-74126279                            | NM_001166213:4712       | Fam129c       | INSIDE                 | 0.473                                                        | 0.476                          | 1866.23            | 888.43             | 0.225                          | 1409.07            | 317.59             |
| A_68_P30642670 | chr16:30599886-30599930                           | NM_177632:100           | Fam43a        | INSIDE                 | 0.473                                                        | 0.614                          | 2985.20            | 1833.32            | 0.291                          | 2009.95            | 584.06             |
| A_68_P23145500 | chr4:99317555-99317599                            | NM_010425:-5413         | Foxd3         | PROMOTER               | 0.473                                                        | 0.624                          | 2532.12            | 1581.00            | 0.295                          | 1875.23            | 553.52             |
| A_68_P26000510 | chr8:83135226-83135270                            | NM_001167898:311        | Frem3         | INSIDE                 | 0.473                                                        | 0.687                          | 1682.60            | 1156.70            | 0.325                          | 1417.04            | 460.90             |
| A_68_P26346365 | chr9:21092135-21092179                            | NM_145416:257           | Kri1          | INSIDE                 | 0.473                                                        | 0.659                          | 1141.12            | 752.12             | 0.312                          | 934.66             | 291.63             |
| A_68_P20961508 | chr2:3201225-3201269                              | NM_008708:-313          | Nmt2          | PROMOTER               | 0.473                                                        | 0.732                          | 2027.47            | 1483.22            | 0.346                          | 1469.18            | 508.10             |
| A_68_P25435754 | chr7:121559761-121559805                          | NM_011055:1015          | Pde3b         | INSIDE                 | 0.473                                                        | 0.659                          | 838.96             | 553.00             | 0.312                          | 774.19             | 241.19             |
| A_68_P30979597 | chr16:94347042-94347086                           | NM_011377:261560        | Sim2          | INSIDE                 | 0.473                                                        | 0.532                          | 2893.16            | 1538.32            | 0.251                          | 2255.31            | 566.90             |
| A_68_P23576135 | chr5:31350810-31350854                            | NM_177870:-380          | Slc5a6        | PROMOTER               | 0.473                                                        | 0.577                          | 1275.52            | 735.41             | 0.273                          | 903.48             | 246.57             |
| A_68_P28168286 | chr11:117830189-117830233                         | NM_007707:470           | Socs3         | INSIDE                 | 0.473                                                        | 0.485                          | 1355.41            | 657.76             | 0.230                          | 1091.57            | 250.74             |
| A_68_P30380080 | chr15:81690283-81690327                           | NM_020507:-1548         | Tob2          | PROMOTER               | 0.473                                                        | 0.481                          | 2092.30            | 1006.96            | 0.228                          | 1728.62            | 393.52             |
| A_68_P21075774 | chr2:25877393-25877437                            | NM_133835:-134          | Ubac1         | PROMOTER               | 0.473                                                        | 0.587                          | 929.27             | 545.17             | 0.277                          | 735.12             | 203.83             |
| A_68_P21084623 | chr2:27282256-27282300                            | NM_009500:67            | Vav2          | INSIDE                 | 0.473                                                        | 0.558                          | 3145.39            | 1754.33            | 0.264                          | 2375.05            | 626.26             |
| A_68_P25075288 | chr7:48157851-48157898                            | NM_021387:3227          | Vstm2b        | INSIDE                 | 0.473                                                        | 0.630                          | 1247.51            | 786.47             | 0.298                          | 905.97             | 270.08             |
| A_68_P24974125 | chr7:13594994-13595038                            | NM_001024699:133        | Zbtb45        | INSIDE                 | 0.473                                                        | 1.355                          | 3694.32            | 5006.44            | 0.640                          | 2654.12            | 1699.85            |
| A_68_P26403090 | chr9:31840408-31840452                            |                         |               | Unknown                | 0.473                                                        | 0.376                          | 1630.61            | 613.81             | 0.178                          | 1260.21            | 224.50             |
| A_68_P22129173 | chr3:51144733-51144777                            | ENSMUST00000135496:-174 |               | PROMOTER               | 0.473                                                        | 0.675                          | 4449.62            | 3001.69            | 0.319                          | 3463.98            | 1104.51            |
| A_68_P23222740 | chr4:114659326-114659370                          | NM_025647:485           | Cmpk1         | INSIDE                 | 0.472                                                        | 0.487                          | 1647.80            | 802.03             | 0.230                          | 1205.52            | 276.76             |
| A_68_P31951138 | chr19:10599754-10599798                           | NM_001164272:43         | Cpsf7         | INSIDE                 | 0.472                                                        | 0.479                          | 1594.89            | 764.44             | 0.226                          | 1409.44            | 319.07             |



| ProbeName      | Target position of probe on CpG island microarray | TargetID                | GeneSymbol    | CpG island Description | Ratio of relative methylation (TiO <sub>2</sub> -NP/Vehicle) | Sham group                     |                    |                    | TiO <sub>2</sub> -H group      |                    |                    |
|----------------|---------------------------------------------------|-------------------------|---------------|------------------------|--------------------------------------------------------------|--------------------------------|--------------------|--------------------|--------------------------------|--------------------|--------------------|
|                |                                                   |                         |               |                        |                                                              | Relative methylation (Cy5/Cy3) | Cy3 signal (Input) | Cy5 signal (MeDIP) | Relative methylation (Cy5/Cy3) | Cy3 signal (Input) | Cy5 signal (MeDIP) |
| A_68_P31157714 | chr17:35257967-35258011                           | NM_009975:404           | Csnk2b        | INSIDE                 | 0.472                                                        | 0.713                          | 1646.62            | 1174.39            | 0.336                          | 1354.79            | 455.74             |
| A_68_P21317590 | chr2:70956135-70956179                            | NM_028593:46            | Cybrd1        | INSIDE                 | 0.472                                                        | 0.418                          | 3059.45            | 1277.99            | 0.197                          | 2248.01            | 443.31             |
| A_68_P26016157 | chr8:86239183-86239227                            | NM_197982:129           | Ddx39         | INSIDE                 | 0.472                                                        | 0.548                          | 2210.33            | 1210.20            | 0.259                          | 1900.00            | 491.19             |
| A_68_P28419964 | chr12:50485980-50486024                           | NM_008241:2009          | Foxg1         | INSIDE                 | 0.472                                                        | 0.553                          | 2152.69            | 1189.94            | 0.261                          | 1712.87            | 446.76             |
| A_68_P25892523 | chr8:60131751-60131795                            | NM_001167981:80         | Galnt7        | INSIDE                 | 0.472                                                        | 0.557                          | 2676.26            | 1490.97            | 0.263                          | 2155.19            | 566.67             |
| A_68_P24449395 | chr6:52195431-52195475                            | NR_015348:211           | Hoxa11as      | INSIDE                 | 0.472                                                        | 0.477                          | 1110.75            | 529.39             | 0.225                          | 889.37             | 200.15             |
| A_68_P20739614 | chr1:157590081-157590125                          | NM_010712:-945          | Lhx4          | PROMOTER               | 0.472                                                        | 0.703                          | 5881.13            | 4136.58            | 0.332                          | 4653.92            | 1546.13            |
| A_68_P27286341 | chr10:80380635-80380679                           | NM_010722:334           | Lmnb2         | INSIDE                 | 0.472                                                        | 0.487                          | 1673.95            | 814.70             | 0.230                          | 1361.95            | 312.94             |
| A_68_P31934035 | chr19:6335704-6335748                             | NM_001168490:688        | Men1          | INSIDE                 | 0.472                                                        | 0.386                          | 3461.25            | 1336.00            | 0.182                          | 2378.54            | 432.94             |
| A_68_P26144743 | chr8:109948649-109948693                          | NM_026277:268           | Nob1          | INSIDE                 | 0.472                                                        | 0.543                          | 964.11             | 523.06             | 0.256                          | 858.72             | 220.12             |
| A_68_P31640473 | chr18:39648559-39648603                           | NM_008173:-1681         | Nr3c1         | PROMOTER               | 0.472                                                        | 1.405                          | 4421.18            | 6213.11            | 0.664                          | 3063.80            | 2033.46            |
| A_68_P26343622 | chr9:20531703-20531748                            | NM_173777:933           | Olfm2         | INSIDE                 | 0.472                                                        | 0.370                          | 2747.40            | 1015.49            | 0.174                          | 2246.34            | 391.89             |
| A_68_P30961944 | chr16:91270214-91270258                           | NM_016968:223           | Olig1         | INSIDE                 | 0.472                                                        | 0.457                          | 1283.92            | 587.13             | 0.216                          | 1004.69            | 216.65             |
| A_68_P31627038 | chr18:37303465-37303509                           | NM_001003672:-136       | Pcdhac2       | PROMOTER               | 0.472                                                        | 0.722                          | 1640.17            | 1184.88            | 0.341                          | 1425.13            | 486.14             |
| A_68_P31985662 | chr19:17468432-17468476                           | NM_019437:-78           | Rfk           | PROMOTER               | 0.472                                                        | 0.417                          | 3102.35            | 1293.67            | 0.197                          | 2617.78            | 514.97             |
| A_68_P22030177 | chr3:30692267-30692311                            | NM_027016:491           | Sec62         | INSIDE                 | 0.472                                                        | 0.442                          | 1312.52            | 580.65             | 0.209                          | 1143.66            | 239.01             |
| A_68_P28261127 | chr12:15821624-15821668                           | NM_144551:1945          | Trib2         | INSIDE                 | 0.472                                                        | 0.419                          | 2338.01            | 980.55             | 0.198                          | 1791.67            | 354.29             |
| A_68_P26372145 | chr9:26541609-26541653                            | ENSMUST00000067362:195  |               | INSIDE                 | 0.472                                                        | 0.604                          | 2151.66            | 1300.39            | 0.285                          | 1704.51            | 486.61             |
| A_68_P29531802 | chr14:35582497-35582541                           | ENSMUST00000143244:9106 |               | INSIDE                 | 0.472                                                        | 0.620                          | 2418.52            | 1498.84            | 0.293                          | 1839.47            | 538.37             |
| A_68_P24056049 | chr5:123958827-123958871                          | NM_198611:-1620         | B3gnt4        | PROMOTER               | 0.471                                                        | 0.661                          | 2449.16            | 1620.11            | 0.312                          | 2061.15            | 642.77             |
| A_68_P27788009 | chr11:50139294-50139338                           | NM_001110499:-141       | Canx          | PROMOTER               | 0.471                                                        | 0.466                          | 1378.00            | 642.66             | 0.220                          | 1091.46            | 239.59             |
| A_68_P30459325 | chr15:95485192-95485236                           | NM_207533:-12           | Dbx2          | PROMOTER               | 0.471                                                        | 0.699                          | 1706.24            | 1192.21            | 0.329                          | 1140.96            | 375.23             |
| A_68_P32129171 | chr19:43954139-43954183                           | NM_028029:32722         | Dnmbp         | INSIDE                 | 0.471                                                        | 0.428                          | 3182.83            | 1361.88            | 0.201                          | 2210.38            | 445.27             |
| A_68_P21629726 | chr2:130250214-130250258                          | NM_001114541:141        | Fam113a       | INSIDE                 | 0.471                                                        | 0.515                          | 1386.82            | 714.78             | 0.243                          | 1080.77            | 262.17             |
| A_68_P30642673 | chr16:30600225-30600275                           | NM_177632:442           | Fam43a        | INSIDE                 | 0.471                                                        | 0.502                          | 1239.68            | 621.77             | 0.236                          | 1011.07            | 239.09             |
| A_68_P24793341 | chr6:119429106-119429150                          | NM_133940:-557          | Fbx114        | PROMOTER               | 0.471                                                        | 1.354                          | 3221.50            | 4360.39            | 0.638                          | 2446.36            | 1561.18            |
| A_68_P31063013 | chr17:15115758-15115802                           | NM_001123367:-4         | Gm3417        | DIVERGENT_PROMOTER     | 0.471                                                        | 0.517                          | 1851.68            | 957.30             | 0.243                          | 1691.50            | 411.68             |
| A_68_P32095558 | chr19:37509889-37509933                           | NM_008245:580           | Hhex          | INSIDE                 | 0.471                                                        | 0.509                          | 1751.67            | 892.45             | 0.240                          | 1582.63            | 379.54             |
| A_68_P20832394 | chr1:174256462-174256506                          | NM_008429:2910          | Kcnj9         | INSIDE                 | 0.471                                                        | 0.702                          | 1531.96            | 1075.27            | 0.330                          | 1106.62            | 365.65             |
| A_68_P24038701 | chr5:120885606-120885650                          | NM_008499:3734          | Lhx5          | INSIDE                 | 0.471                                                        | 0.399                          | 2019.20            | 806.60             | 0.188                          | 1501.33            | 282.27             |
| A_68_P24764866 | chr6:114232993-114233037                          | NM_178703:386           | Ste6a1        | INSIDE                 | 0.471                                                        | 0.533                          | 1506.24            | 803.05             | 0.251                          | 1206.57            | 302.85             |
| A_68_P29937483 | chr14:118635646-118635690                         | NM_177753:584           | Sox21         | INSIDE                 | 0.471                                                        | 0.649                          | 2099.79            | 1362.56            | 0.305                          | 1634.50            | 499.23             |
| A_68_P29292646 | chr13:105607347-105607391                         | NM_026075:50            | Srekl1p1      | INSIDE                 | 0.471                                                        | 0.441                          | 1745.54            | 769.69             | 0.208                          | 1192.85            | 247.69             |
| A_68_P24164951 | chr5:145993056-145993100                          | NM_028298:451           | Zfp655        | INSIDE                 | 0.471                                                        | 0.556                          | 1210.41            | 672.50             | 0.262                          | 1057.89            | 277.07             |
| A_68_P24154098 | chr5:143690981-143691026                          |                         |               | Unknown                | 0.471                                                        | 0.660                          | 855.55             | 565.07             | 0.311                          | 747.35             | 232.27             |
| A_68_P28607942 | chr12:87423668-87423712                           | NM_001199843:180        | 1700019E19Rik | INSIDE                 | 0.470                                                        | 0.595                          | 2058.51            | 1224.67            | 0.280                          | 1637.92            | 458.01             |
| A_68_P20504209 | chr1:107560642-107560686                          | NM_029349:227           | 2310035C23Rik | INSIDE                 | 0.470                                                        | 0.554                          | 1750.35            | 969.90             | 0.260                          | 1233.58            | 320.97             |
| A_68_P28656381 | chr12:96933833-96933877                           | NM_201518:3419          | Flrt2         | INSIDE                 | 0.470                                                        | 0.524                          | 1366.33            | 715.37             | 0.246                          | 1140.47            | 280.64             |
| A_68_P22892660 | chr4:47105120-47105164                            | NM_172693:318           | Galnt12       | INSIDE                 | 0.470                                                        | 0.618                          | 991.77             | 612.74             | 0.290                          | 756.44             | 219.62             |
| A_68_P26622300 | chr9:71333407-71333451                            | NM_001164793:-663       | Grin1a        | PROMOTER               | 0.470                                                        | 0.558                          | 1220.55            | 681.52             | 0.262                          | 1050.40            | 275.48             |
| A_68_P28271880 | chr12:17697825-17697869                           | NM_016677:227           | Hpcal1        | INSIDE                 | 0.470                                                        | 0.636                          | 900.56             | 572.63             | 0.299                          | 796.02             | 238.04             |
| A_68_P22404200 | chr3:106904965-106905010                          | NM_008417:503           | Kena2         | INSIDE                 | 0.470                                                        | 0.491                          | 1476.98            | 725.75             | 0.231                          | 1028.24            | 237.46             |
| A_68_P31130474 | chr17:30026534-30026578                           | NM_001081160:-1729      | Mdga1         | PROMOTER               | 0.470                                                        | 0.578                          | 1314.33            | 759.29             | 0.271                          | 1054.23            | 286.10             |
| A_68_P28301679 | chr12:27099772-27099816                           | NM_001081977:327        | Rnf144a       | INSIDE                 | 0.470                                                        | 0.623                          | 3090.85            | 1926.55            | 0.293                          | 2339.86            | 685.71             |
| A_68_P20945779 | chr1:194661281-194661325                          | NM_001177794:16639      | Sertad4       | DOWNSTREAM             | 0.470                                                        | 0.428                          | 1399.41            | 598.48             | 0.201                          | 1143.28            | 229.72             |
| A_68_P27165511 | chr10:58276497-58276541                           | NM_172788:412           | Sh3rf3        | INSIDE                 | 0.470                                                        | 0.573                          | 1509.66            | 865.21             | 0.270                          | 1204.93            | 324.88             |
| A_68_P21101533 | chr2:29989110-29989161                            | NM_146252:-255          | Tbc1d13       | DIVERGENT_PROMOTER     | 0.470                                                        | 0.705                          | 1526.27            | 1075.63            | 0.331                          | 1120.23            | 370.66             |
| A_68_P25004262 | chr7:25101544-25101588                            | NM_001199321:119        | Zfp94         | INSIDE                 | 0.470                                                        | 0.719                          | 2015.64            | 1448.31            | 0.338                          | 1391.49            | 470.18             |
| A_68_P21421302 | chr2:91042978-91043022                            | NM_007387:-68           | Acp2          | DIVERGENT_PROMOTER     | 0.469                                                        | 0.553                          | 1544.97            | 853.77             | 0.259                          | 1194.36            | 309.42             |
| A_68_P24674230 | chr6:97567022-97567066                            | NM_145148:607           | Frdm4b        | INSIDE                 | 0.469                                                        | 0.572                          | 1018.31            | 582.90             | 0.268                          | 869.90             | 233.50             |
| A_68_P24992976 | chr7:19967388-19967432                            | NR_030759:-4581         | Mir343        | PROMOTER               | 0.469                                                        | 0.538                          | 1121.89            | 603.12             | 0.252                          | 935.90             | 236.16             |

| ProbeName      | Target position of probe on CpG island microarray | TargetID           | GeneSymbol    | CpG island Description | Ratio of relative methylation (TiO <sub>2</sub> -NP/Vehicle) | Sham group                     |                    |                    | TiO <sub>2</sub> -H group      |                    |                    |
|----------------|---------------------------------------------------|--------------------|---------------|------------------------|--------------------------------------------------------------|--------------------------------|--------------------|--------------------|--------------------------------|--------------------|--------------------|
|                |                                                   |                    |               |                        |                                                              | Relative methylation (Cy5/Cy3) | Cy3 signal (Input) | Cy5 signal (MeDIP) | Relative methylation (Cy5/Cy3) | Cy3 signal (Input) | Cy5 signal (MeDIP) |
| A_68_P24051803 | chr5:123158016-123158060                          | NM_011026:473      | P2rx4         | INSIDE                 | 0.469                                                        | 0.538                          | 1178.68            | 634.53             | 0.252                          | 925.97             | 233.59             |
| A_68_P27109366 | chr10:44786725-44786769                           | NM_011156:-273     | Prep          | PROMOTER               | 0.469                                                        | 0.630                          | 1146.19            | 722.10             | 0.295                          | 977.61             | 288.59             |
| A_68_P24137873 | chr5:140302698-140302742                          | NM_025604:77       | Psmg3         | INSIDE                 | 0.469                                                        | 0.585                          | 1517.65            | 888.49             | 0.275                          | 1208.26            | 331.73             |
| A_68_P26260677 | chr8:129494964-129495008                          | NM_172762:-7       | Rbm34         | PROMOTER               | 0.469                                                        | 0.470                          | 1410.04            | 663.32             | 0.221                          | 1205.66            | 266.11             |
| A_68_P30152564 | chr15:39028639-39028683                           | NM_053271:-1217    | Rims2         | PROMOTER               | 0.469                                                        | 0.685                          | 1621.62            | 1110.15            | 0.321                          | 1135.29            | 364.41             |
| A_68_P26044784 | chr8:91566566-91566616                            | NM_021390:1471     | Sall1         | INSIDE                 | 0.469                                                        | 0.628                          | 1205.93            | 756.78             | 0.294                          | 986.55             | 290.39             |
| A_68_P32340125 | chrX:39264784-39264828                            | NM_001033422:272   | Thoc2         | INSIDE                 | 0.469                                                        | 1.577                          | 6527.99            | 10294.78           | 0.740                          | 2716.10            | 2010.36            |
| A_68_P27850821 | chr11:61668019-61668063                           | NM_013881:554      | Ulk2          | INSIDE                 | 0.469                                                        | 0.615                          | 921.91             | 566.85             | 0.289                          | 894.06             | 258.08             |
| A_68_P20778493 | chr1:164501104-164501148                          | NM_016796:168      | Vamp4         | INSIDE                 | 0.469                                                        | 0.563                          | 2489.20            | 1400.49            | 0.264                          | 2284.57            | 602.27             |
| A_68_P27589657 | chr11:11016303-11016347                           | NM_177033:2306     | Vwc2          | INSIDE                 | 0.469                                                        | 0.643                          | 1224.08            | 786.97             | 0.302                          | 1031.46            | 311.26             |
| A_68_P21388692 | chr2:83484476-83484520                            | NM_026934:-236     | Zc3h15        | PROMOTER               | 0.469                                                        | 0.602                          | 1674.83            | 1008.09            | 0.282                          | 1220.88            | 344.55             |
| A_68_P25504797 | chr7:134398221-134398265                          | NM_177362:10203    | Zfp771        | INSIDE                 | 0.469                                                        | 0.439                          | 1289.62            | 566.25             | 0.206                          | 989.47             | 203.64             |
| A_68_P20192515 | chr1:44159202-44159246                            | NM_029368:9        | 1700029F09Rik | INSIDE                 | 0.468                                                        | 0.483                          | 1667.14            | 805.58             | 0.226                          | 1423.63            | 321.98             |
| A_68_P24449865 | chr6:52264311-52264355                            | NR_038163:494      | 5730457N03Rik | INSIDE                 | 0.468                                                        | 0.442                          | 1882.45            | 831.31             | 0.207                          | 1404.11            | 290.39             |
| A_68_P28612719 | chr12:88223642-88223689                           | NM_145836:2099     | 6430527G18Rik | INSIDE                 | 0.468                                                        | 0.594                          | 1052.63            | 625.27             | 0.278                          | 853.20             | 237.12             |
| A_68_P31369877 | chr17:78600790-78600834                           | NM_015800:1225     | Crim1         | INSIDE                 | 0.468                                                        | 0.707                          | 1646.14            | 1163.88            | 0.301                          | 1227.24            | 406.36             |
| A_68_P26240286 | chr8:126038854-126038898                          | NM_001170976:479   | Dbn1d1        | INSIDE                 | 0.468                                                        | 0.633                          | 1393.98            | 881.80             | 0.296                          | 1074.10            | 317.89             |
| A_68_P24602877 | chr6:85019040-85019084                            | NM_177077:445      | Exoc6b        | INSIDE                 | 0.468                                                        | 0.490                          | 1377.13            | 674.50             | 0.229                          | 1065.92            | 244.36             |
| A_68_P24620285 | chr6:88140131-88140179                            | NM_008090:-8503    | Gata2         | PROMOTER               | 0.468                                                        | 0.648                          | 2131.57            | 1381.31            | 0.303                          | 1653.83            | 501.27             |
| A_68_P26586064 | chr9:64989806-64989850                            | NM_008988:833      | Igdec3        | INSIDE                 | 0.468                                                        | 0.560                          | 1358.97            | 761.54             | 0.262                          | 1042.01            | 273.08             |
| A_68_P32142233 | chr19:46210854-46210898                           | NM_008852:11939    | Pitx3         | INSIDE                 | 0.468                                                        | 0.469                          | 2790.16            | 1308.54            | 0.219                          | 2201.20            | 483.12             |
| A_68_P22169681 | chr3:58496575-58496620                            | NM_009174:-287     | Siah2         | PROMOTER               | 0.468                                                        | 0.542                          | 1220.30            | 661.62             | 0.254                          | 847.22             | 215.09             |
| A_68_P31924555 | chr19:4712589-4712633                             | NM_021287:1388     | Spnb3         | INSIDE                 | 0.468                                                        | 0.565                          | 1249.14            | 706.20             | 0.265                          | 1019.90            | 270.06             |
| A_68_P27628921 | chr11:19825017-19825061                           | NM_033523:594      | Spred2        | INSIDE                 | 0.468                                                        | 0.469                          | 4522.81            | 2122.40            | 0.220                          | 3561.26            | 781.88             |
| A_68_P31320371 | chr17:69186413-69186457                           | NM_001206661:-41   | Tmem200c      | PROMOTER               | 0.468                                                        | 0.599                          | 1833.77            | 1098.41            | 0.281                          | 1413.42            | 396.60             |
| A_68_P22382659 | chr3:102539232-102539276                          | NM_027533:562      | Tspan2        | INSIDE                 | 0.468                                                        | 0.485                          | 3086.63            | 1495.77            | 0.227                          | 2452.08            | 556.29             |
| A_68_P23955157 | A_68_P23955157                                    |                    |               | Unknown                | 0.468                                                        | 4.729                          | 398.85             | 1886.19            | 2.212                          | 309.92             | 685.44             |
| A_68_P24787430 | chr6:118512210-118512259                          | NM_001081112:40    | Ankrd26       | INSIDE                 | 0.467                                                        | 0.595                          | 2127.73            | 1265.26            | 0.277                          | 1523.83            | 422.85             |
| A_68_P32260572 | chrX:11705418-11705462                            | NM_001168321:32041 | Bcor          | INSIDE                 | 0.467                                                        | 0.572                          | 1644.76            | 940.80             | 0.267                          | 615.99             | 164.54             |
| A_68_P28175448 | chr11:118902325-118902369                         | NM_013926:-119     | Cbx8          | PROMOTER               | 0.467                                                        | 0.643                          | 2083.81            | 1339.54            | 0.300                          | 1467.55            | 440.81             |
| A_68_P29627745 | chr14:58017455-58017499                           | NM_030004:-156     | Cry11         | PROMOTER               | 0.467                                                        | 0.497                          | 1504.53            | 747.01             | 0.232                          | 1267.21            | 293.90             |
| A_68_P26807068 | chr9:107095792-107095844                          | NM_153413:38422    | Dock3         | INSIDE                 | 0.467                                                        | 5.465                          | 905.88             | 4950.49            | 2.550                          | 696.03             | 1774.54            |
| A_68_P26585436 | chr9:64880684-64880728                            | NM_028906:442      | Dpp8          | INSIDE                 | 0.467                                                        | 0.699                          | 1563.21            | 1093.18            | 0.326                          | 1063.72            | 347.30             |
| A_68_P24658386 | chr6:94650061-94650105                            | NM_008377:57       | Lrig1         | INSIDE                 | 0.467                                                        | 0.722                          | 2034.01            | 1468.57            | 0.337                          | 1755.80            | 592.25             |
| A_68_P24377897 | chr6:38501394-38501438                            | NM_001170849:-27   | Luc712        | PROMOTER               | 0.467                                                        | 0.536                          | 2359.55            | 1265.25            | 0.250                          | 2165.71            | 541.85             |
| A_68_P27922356 | chr11:74584498-74584542                           | NM_026197:156      | Mettl16       | INSIDE                 | 0.467                                                        | 0.541                          | 1514.82            | 819.63             | 0.253                          | 1039.96            | 263.00             |
| A_68_P21501839 | chr2:106535501-106535545                          | NM_029837:-235     | Mpped2        | PROMOTER               | 0.467                                                        | 0.609                          | 1671.72            | 1017.64            | 0.284                          | 1385.85            | 394.21             |
| A_68_P22339050 | chr3:94247442-94247486                            | NM_030116:207      | Mrpl9         | INSIDE                 | 0.467                                                        | 0.706                          | 2630.32            | 1858.27            | 0.330                          | 2047.71            | 676.03             |
| A_68_P23281848 | chr4:126430490-126430534                          | NM_011986:161      | Ncdn          | INSIDE                 | 0.467                                                        | 0.557                          | 1957.44            | 1090.81            | 0.260                          | 1608.46            | 418.21             |
| A_68_P28875777 | chr13:22099045-22099089                           | NM_019429:2544     | Prss16        | INSIDE                 | 0.467                                                        | 0.536                          | 1015.41            | 544.28             | 0.250                          | 861.09             | 215.62             |
| A_68_P30778981 | chr16:56037605-56037649                           | NM_029092:261      | Rg9mtd1       | INSIDE                 | 0.467                                                        | 0.420                          | 1245.39            | 522.66             | 0.196                          | 997.37             | 195.53             |
| A_68_P24054149 | chr5:123591328-123591372                          | NM_175092:-8712    | Rhof          | PROMOTER               | 0.467                                                        | 0.477                          | 1636.68            | 781.23             | 0.223                          | 1258.59            | 280.63             |
| A_68_P27045330 | chr10:31328554-31328598                           | NM_001146349:955   | Rnf217        | INSIDE                 | 0.467                                                        | 0.463                          | 2002.46            | 926.91             | 0.216                          | 1624.02            | 351.12             |
| A_68_P32234209 | chrX:5977910-5977954                              | NM_001040459:670   | Shroom4       | INSIDE                 | 0.467                                                        | 1.426                          | 3548.57            | 5061.29            | 0.666                          | 1349.60            | 899.01             |
| A_68_P25661257 | chr8:12396498-12396542                            | NM_009233:1002     | Sox1          | INSIDE                 | 0.467                                                        | 0.699                          | 2548.57            | 1781.43            | 0.326                          | 1820.57            | 594.08             |
| A_68_P28033247 | chr11:94347425-94347469                           | NM_144827:-822     | Spata20       | PROMOTER               | 0.467                                                        | 0.635                          | 896.09             | 569.16             | 0.297                          | 743.17             | 220.44             |
| A_68_P31093747 | chr17:23944056-23944100                           | NM_175229:3925     | Srrm2         | INSIDE                 | 0.467                                                        | 1.416                          | 1224.30            | 1733.34            | 0.661                          | 1023.49            | 676.73             |
| A_68_P24104838 | chr5:133017511-133017555                          | NM_177047:681      | Aut2          | INSIDE                 | 0.466                                                        | 0.677                          | 1020.42            | 690.35             | 0.315                          | 838.88             | 264.39             |
| A_68_P21077003 | chr2:26057606-26057650                            | NM_001039653:4448  | Lhx3          | INSIDE                 | 0.466                                                        | 0.441                          | 2104.38            | 927.16             | 0.205                          | 1689.06            | 346.69             |
| A_68_P25279966 | chr7:90018157-90018201                            | NM_175366:2336     | Mex3b         | INSIDE                 | 0.466                                                        | 0.598                          | 945.76             | 565.74             | 0.279                          | 699.85             | 195.23             |
| A_68_P25948617 | chr8:72426740-72426784                            | NM_023312:-305     | Ndufa13       | PROMOTER               | 0.466                                                        | 0.541                          | 1871.68            | 1012.20            | 0.252                          | 1402.86            | 353.32             |

| ProbeName      | Target position of probe on CpG island microarray | TargetID           | GeneSymbol    | CpG island Description | Ratio of relative methylation (TiO <sub>2</sub> -NP/Vehicle) | Sham group                     |                    |                    | TiO <sub>2</sub> -H group      |                    |                    |
|----------------|---------------------------------------------------|--------------------|---------------|------------------------|--------------------------------------------------------------|--------------------------------|--------------------|--------------------|--------------------------------|--------------------|--------------------|
|                |                                                   |                    |               |                        |                                                              | Relative methylation (Cy5/Cy3) | Cy3 signal (Input) | Cy5 signal (MeDIP) | Relative methylation (Cy5/Cy3) | Cy3 signal (Input) | Cy5 signal (MeDIP) |
| A_68_P31988616 | chr19:17911313-17911358                           | NM_001190483:787   | Pesk5         | INSIDE                 | 0.466                                                        | 0.599                          | 1225.76            | 734.57             | 0.279                          | 1047.43            | 292.23             |
| A_68_P30447264 | chr15:93331165-93331209                           | NM_001033217:95136 | Prickle1      | INSIDE                 | 0.466                                                        | 1.561                          | 2699.48            | 4212.75            | 0.727                          | 2023.69            | 1470.26            |
| A_68_P20353660 | chr1:75381669-75381713                            | NM_001085370:-494  | Speg          | PROMOTER               | 0.466                                                        | 1.573                          | 5132.50            | 8074.70            | 0.733                          | 3395.55            | 2488.68            |
| A_68_P27855417 | chr11:62545135-62545179                           | NM_133208:-2561    | Zfp287        | PROMOTER               | 0.466                                                        | 0.701                          | 1194.57            | 837.43             | 0.327                          | 992.98             | 324.31             |
| A_68_P24155794 | chr5:144031725-144031769                          | NM_017467:-45      | Zfp316        | PROMOTER               | 0.466                                                        | 0.561                          | 1936.11            | 1086.82            | 0.262                          | 1548.00            | 404.81             |
| A_68_P24973048 | chr7:13388705-13388749                            | NM_026046:15483    | Zfp329        | DOWNSTREAM             | 0.466                                                        | 0.697                          | 1307.60            | 911.89             | 0.325                          | 1083.63            | 351.86             |
| A_68_P25021520 | chr7:29164259-29164303                            | NM_011756:-33      | Zfp36         | PROMOTER               | 0.466                                                        | 0.666                          | 1620.87            | 1079.14            | 0.310                          | 1331.10            | 413.27             |
| A_68_P24010682 | chr5:116081413-116081457                          | NR_027810:391      |               | INSIDE                 | 0.465                                                        | 0.585                          | 1981.41            | 1158.76            | 0.272                          | 1367.20            | 372.10             |
| A_68_P22402613 | chr3:106525217-106525262                          | NM_001039488:640   | 4933421E11Rik | INSIDE                 | 0.465                                                        | 0.674                          | 3373.51            | 2272.66            | 0.313                          | 2582.86            | 808.30             |
| A_68_P20252945 | chr1:57463017-57463061                            | NM_001081181:-353  | 9430016H08Rik | PROMOTER               | 0.465                                                        | 0.573                          | 1971.74            | 1129.97            | 0.266                          | 1549.91            | 413.03             |
| A_68_P28175797 | chr11:118951776-118951826                         | NM_007625:-4249    | Cbx4          | PROMOTER               | 0.465                                                        | 0.712                          | 1396.94            | 995.03             | 0.332                          | 1080.57            | 358.28             |
| A_68_P27643749 | chr11:22890683-22890727                           | NM_009837:112      | Cet4          | INSIDE                 | 0.465                                                        | 0.693                          | 1394.15            | 966.78             | 0.322                          | 1140.92            | 367.52             |
| A_68_P20849636 | chr1:177622240-177622284                          | NM_021350:-3778    | Chml1         | PROMOTER               | 0.465                                                        | 0.700                          | 3019.19            | 2114.39            | 0.325                          | 2048.46            | 666.65             |
| A_68_P27259221 | chr10:75356293-75356337                           | NM_024440:172      | Derl3         | INSIDE                 | 0.465                                                        | 0.597                          | 1430.30            | 854.16             | 0.278                          | 1172.62            | 325.43             |
| A_68_P23609675 | chr5:37187966-37188010                            | NM_026242:5        | Mrfap1        | INSIDE                 | 0.465                                                        | 0.470                          | 1789.03            | 840.97             | 0.219                          | 1560.60            | 341.40             |
| A_68_P30883587 | chr16:76293685-76293730                           | NM_173440:79587    | Nrip1         | INSIDE                 | 0.465                                                        | 1.378                          | 2289.28            | 3155.19            | 0.640                          | 1674.90            | 1072.31            |
| A_68_P28269482 | chr12:17273597-17273641                           | NM_027959:218      | Pdia6         | INSIDE                 | 0.465                                                        | 0.497                          | 1277.94            | 634.88             | 0.231                          | 976.51             | 225.42             |
| A_68_P32071923 | chr19:32831726-32831770                           | NM_008960:-318     | Pten          | PROMOTER               | 0.465                                                        | 0.486                          | 2005.36            | 974.46             | 0.226                          | 1531.13            | 345.72             |
| A_68_P32070012 | chr19:32462008-32462052                           | NM_144792:914      | Sgms1         | INSIDE                 | 0.465                                                        | 0.636                          | 2021.00            | 1284.89            | 0.295                          | 1504.70            | 444.42             |
| A_68_P30475041 | chr15:98364232-98364276                           | NR_034052:-7364    | Snora2b       | PROMOTER               | 0.465                                                        | 0.582                          | 4763.06            | 2773.17            | 0.271                          | 3349.02            | 931.88             |
| A_68_P22393610 | chr3:104667906-104667950                          | NM_153091:-70      | St7l          | DIVERGENT_PROMOTER     | 0.465                                                        | 0.373                          | 1659.75            | 618.42             | 0.173                          | 1471.45            | 254.75             |
| A_68_P21265453 | chr2:61494424-61494471                            | NM_001164071:63294 | Tank          | DOWNSTREAM             | 0.465                                                        | 0.591                          | 1437.71            | 849.42             | 0.275                          | 955.14             | 262.41             |
| A_68_P30510672 | chr16:4541712-4541756                             | NM_031182:17986    | Tcfap4        | DOWNSTREAM             | 0.465                                                        | 0.579                          | 1939.95            | 1122.57            | 0.269                          | 1486.61            | 399.77             |
| A_68_P27842504 | chr11:60166452-60166496                           | NM_001039092:-67   | Tom1l2        | DIVERGENT_PROMOTER     | 0.465                                                        | 0.454                          | 1311.65            | 595.13             | 0.211                          | 1114.16            | 234.83             |
| A_68_P24459354 | chr6:53770780-53770824                            | NM_025817:17       | Tril          | INSIDE                 | 0.465                                                        | 0.507                          | 1818.07            | 922.10             | 0.236                          | 1314.72            | 310.32             |
| A_68_P20444769 | chr1:93698784-93698828                            | NM_007855:753      | Twist2        | INSIDE                 | 0.465                                                        | 0.527                          | 1498.21            | 789.11             | 0.245                          | 1092.66            | 267.35             |
| A_68_P28710685 | chr12:106923369-106923413                         | NM_029654:61       | Atg2b         | INSIDE                 | 0.464                                                        | 0.489                          | 1650.17            | 807.24             | 0.227                          | 1234.84            | 280.45             |
| A_68_P25951452 | chr8:72900302-72900346                            | NM_016685:2878     | Comp          | INSIDE                 | 0.464                                                        | 0.556                          | 1257.80            | 699.23             | 0.258                          | 989.21             | 255.21             |
| A_68_P20827968 | chr1:173368006-173368050                          | NM_172647:337      | F11r          | INSIDE                 | 0.464                                                        | 0.415                          | 2052.28            | 852.34             | 0.193                          | 1636.65            | 315.13             |
| A_68_P24129310 | chr5:138635652-138635696                          | NM_177878:133      | Mblac1        | INSIDE                 | 0.464                                                        | 0.517                          | 1585.64            | 819.11             | 0.239                          | 1251.92            | 299.75             |
| A_68_P23226097 | chr4:115511687-115511731                          | NM_021461:-142     | Mknk1         | PROMOTER               | 0.464                                                        | 0.598                          | 2361.22            | 1413.00            | 0.278                          | 1767.09            | 490.40             |
| A_68_P27137647 | chr10:52137521-52137565                           | NM_030250:190      | Nus1          | INSIDE                 | 0.464                                                        | 0.651                          | 5850.61            | 3808.45            | 0.302                          | 4439.83            | 1339.71            |
| A_68_P27567708 | chr11:6192040-6192084                             | NM_010956:463      | Ogdh          | INSIDE                 | 0.464                                                        | 0.572                          | 2473.11            | 1415.47            | 0.265                          | 2093.52            | 555.48             |
| A_68_P31062916 | chr17:15097920-15097964                           | NM_024250:295      | Phf10         | INSIDE                 | 0.464                                                        | 0.653                          | 6295.84            | 4112.61            | 0.303                          | 4914.93            | 1490.71            |
| A_68_P21110351 | chr2:31491732-31491776                            | NM_001123362:-3802 | Prdm12        | PROMOTER               | 0.464                                                        | 0.703                          | 1657.37            | 1165.20            | 0.326                          | 1360.18            | 443.40             |
| A_68_P20740065 | chr1:157659643-157659687                          | NM_001024945:365   | Qsox1         | INSIDE                 | 0.464                                                        | 0.440                          | 2015.71            | 886.96             | 0.204                          | 1703.67            | 348.10             |
| A_68_P23269837 | chr4:124386139-124386183                          | NM_029157:-5944    | Sf3a3         | PROMOTER               | 0.464                                                        | 0.728                          | 3183.11            | 2317.38            | 0.338                          | 2323.93            | 785.44             |
| A_68_P26477291 | chr9:45821396-45821440                            | NM_027498:516      | Sik3          | INSIDE                 | 0.464                                                        | 0.484                          | 1634.85            | 790.55             | 0.225                          | 1437.46            | 322.78             |
| A_68_P31774240 | chr18:64425610-64425654                           | NM_009182:11620    | St8sia3       | INSIDE                 | 0.464                                                        | 0.426                          | 2867.14            | 1221.38            | 0.198                          | 2108.09            | 416.43             |
| A_68_P21070912 | chr2:25110973-25111017                            | NM_177344:36       | Tmem203       | INSIDE                 | 0.464                                                        | 0.493                          | 1972.73            | 973.27             | 0.229                          | 1573.11            | 360.21             |
| A_68_P28003255 | chr11:88860965-88861009                           | NM_009546:270      | Trim25        | INSIDE                 | 0.464                                                        | 0.654                          | 1701.70            | 1112.18            | 0.304                          | 1229.69            | 373.28             |
| A_68_P30499185 | chr15:102523620-102523664                         |                    | Unknown       |                        | 0.464                                                        | 0.651                          | 1422.68            | 926.64             | 0.302                          | 1174.67            | 354.81             |
| A_68_P28755052 | chr12:114394756-114394800                         | NM_134041:147      | 4930427A07Rik | INSIDE                 | 0.463                                                        | 0.324                          | 1702.21            | 551.06             | 0.150                          | 1313.65            | 196.77             |
| A_68_P21773772 | chr2:156688598-156688643                          | NR_015591:61       | 5430405H02Rik | INSIDE                 | 0.463                                                        | 0.535                          | 1153.63            | 617.68             | 0.248                          | 995.21             | 246.50             |
| A_68_P31406130 | chr17:85075448-85075492                           | NM_031884:6793     | Abcg5         | INSIDE                 | 0.463                                                        | 0.464                          | 1145.15            | 530.85             | 0.215                          | 984.79             | 211.54             |
| A_68_P26017291 | chr8:86479163-86479209                            | NM_024184:-406     | Asf1b         | PROMOTER               | 0.463                                                        | 0.562                          | 1330.21            | 747.39             | 0.260                          | 1026.62            | 267.35             |
| A_68_P24951853 | chr7:5011977-5012021                              | NM_146178:3671     | Ccdc106       | INSIDE                 | 0.463                                                        | 0.432                          | 1382.32            | 596.92             | 0.200                          | 1177.84            | 235.28             |
| A_68_P27795131 | chr11:51464219-51464263                           | NR_027958:-215     | D930048N14Rik | PROMOTER               | 0.463                                                        | 0.509                          | 1038.22            | 528.74             | 0.236                          | 791.80             | 186.73             |
| A_68_P29651209 | chr14:62267312-62267356                           | NR_028264:33876    | Dleu2         | INSIDE                 | 0.463                                                        | 0.361                          | 2229.34            | 804.10             | 0.167                          | 1935.60            | 322.97             |
| A_68_P23342688 | chr4:137469440-137469484                          | NM_199307:51311    | Eec1          | INSIDE                 | 0.463                                                        | 0.548                          | 1427.71            | 781.82             | 0.253                          | 1358.60            | 344.25             |
| A_68_P30501631 | chr15:102865426-102865470                         | NM_013553:623      | Hoxc4         | INSIDE                 | 0.463                                                        | 0.569                          | 2610.99            | 1486.39            | 0.264                          | 1955.37            | 515.30             |

| ProbeName      | Target position of probe on CpG island microarray | TargetID                 | GeneSymbol    | CpG island Description | Ratio of relative methylation (TiO <sub>2</sub> -NP/Vehicle) | Sham group                     |                    |                    | TiO <sub>2</sub> -H group      |                    |                    |
|----------------|---------------------------------------------------|--------------------------|---------------|------------------------|--------------------------------------------------------------|--------------------------------|--------------------|--------------------|--------------------------------|--------------------|--------------------|
|                |                                                   |                          |               |                        |                                                              | Relative methylation (Cy5/Cy3) | Cy3 signal (Input) | Cy5 signal (MeDIP) | Relative methylation (Cy5/Cy3) | Cy3 signal (Input) | Cy5 signal (MeDIP) |
| A_68_P31930561 | chr19:5742058-5742102                             | NM_008520:1177           | Ltbp3         | INSIDE                 | 0.463                                                        | 0.603                          | 951.02             | 573.22             | 0.279                          | 751.16             | 209.65             |
| A_68_P25581948 | chr7:147233969-147234013                          | NM_010836:997            | Msx3          | INSIDE                 | 0.463                                                        | 0.570                          | 1680.05            | 957.30             | 0.264                          | 1210.76            | 319.27             |
| A_68_P23310402 | chr4:131700231-131700275                          | NM_013622:149            | Oprd1         | INSIDE                 | 0.463                                                        | 0.397                          | 2616.83            | 1037.78            | 0.183                          | 2323.33            | 426.26             |
| A_68_P31029178 | chr17:8995181-8995225                             | NM_011866:593            | Pde10a        | INSIDE                 | 0.463                                                        | 0.718                          | 1523.98            | 1094.69            | 0.333                          | 1280.21            | 425.82             |
| A_68_P30650142 | chr16:31933808-31933852                           | NM_172822:-106           | Pigz          | PROMOTER               | 0.463                                                        | 0.582                          | 1865.83            | 1086.52            | 0.270                          | 1336.72            | 360.78             |
| A_68_P23374047 | chr4:142802126-142802170                          | NM_001081355:464         | Prdm2         | INSIDE                 | 0.463                                                        | 0.452                          | 2303.49            | 1040.16            | 0.209                          | 1772.34            | 370.54             |
| A_68_P20023926 | chr1:9738516-9738560                              | NM_173443:-75            | Vcpip1        | PROMOTER               | 0.463                                                        | 0.472                          | 1517.67            | 716.53             | 0.219                          | 1190.45            | 260.22             |
| A_68_P21017265 | chr2:13496059-13496103                            | NM_011701:143            | Vim           | INSIDE                 | 0.463                                                        | 0.494                          | 1039.25            | 512.94             | 0.228                          | 894.88             | 204.34             |
| A_68_P28072948 | chr11:101126562-101126606                         | NM_175638:4704           | Wnk4          | INSIDE                 | 0.463                                                        | 0.619                          | 977.66             | 605.58             | 0.287                          | 880.52             | 252.40             |
| A_68_P24864290 | chr6:134877311-134877355                          | NR_037955:-1777          | 1190002F15Rik | PROMOTER               | 0.462                                                        | 0.538                          | 992.32             | 533.45             | 0.248                          | 857.11             | 212.84             |
| A_68_P30382913 | chr15:82176419-82176463                           | NM_026914:-35            | 1500032L24Rik | PROMOTER               | 0.462                                                        | 0.645                          | 963.38             | 621.00             | 0.298                          | 704.86             | 209.96             |
| A_68_P23931758 | chr5:101275769-101275813                          | NM_172715:543            | Agpat9        | INSIDE                 | 0.462                                                        | 0.479                          | 1329.45            | 636.65             | 0.221                          | 1183.39            | 261.82             |
| A_68_P21760474 | chr2:154262689-154262733                          | NM_009823:491            | Cbfa2l2       | INSIDE                 | 0.462                                                        | 0.638                          | 1453.33            | 927.53             | 0.295                          | 1239.88            | 365.91             |
| A_68_P26505265 | chr9:50536331-50536375                            | NM_178118:-263           | Dixdc1        | PROMOTER               | 0.462                                                        | 0.709                          | 1369.82            | 971.01             | 0.327                          | 1114.03            | 364.82             |
| A_68_P23527834 | chr5:21290784-21290828                            | NM_009584:177            | Dnajc2        | INSIDE                 | 0.462                                                        | 0.621                          | 2982.31            | 1851.15            | 0.287                          | 2410.18            | 690.52             |
| A_68_P31418995 | chr17:87154659-87154703                           | NM_010137:1477           | Epas1         | INSIDE                 | 0.462                                                        | 0.551                          | 1253.17            | 690.84             | 0.255                          | 983.82             | 250.56             |
| A_68_P25596355 | chr7:149844923-149844967                          | NM_010514:-235           | Igf2          | DIVERGENT_PROMOTER     | 0.462                                                        | 0.591                          | 1490.03            | 880.28             | 0.273                          | 1202.79            | 328.42             |
| A_68_P30575512 | chr16:17760349-17760393                           | NM_145479:657            | Klhl22        | INSIDE                 | 0.462                                                        | 0.607                          | 1018.38            | 618.37             | 0.280                          | 861.84             | 241.62             |
| A_68_P24449267 | chr6:52180763-52180807                            | NR_029912:-620           | Mir196b       | PROMOTER               | 0.462                                                        | 0.517                          | 1553.06            | 802.41             | 0.239                          | 1186.13            | 283.41             |
| A_68_P28987053 | chr13:43011826-43011870                           | NM_001005740:206899      | Pfactr1       | INSIDE                 | 0.462                                                        | 0.574                          | 1020.04            | 585.88             | 0.265                          | 896.87             | 237.93             |
| A_68_P25957206 | chr8:74031971-74032015                            | NM_032398:3676           | Plvap         | INSIDE                 | 0.462                                                        | 0.617                          | 1776.78            | 1096.06            | 0.285                          | 1370.90            | 390.45             |
| A_68_P24995079 | chr7:20334543-20334587                            | NM_008990:358            | Pvrl2         | INSIDE                 | 0.462                                                        | 0.691                          | 1180.67            | 815.86             | 0.319                          | 933.98             | 298.01             |
| A_68_P20038592 | chr1:12981645-12981695                            | NM_172841:-454           | Stco5a1       | PROMOTER               | 0.462                                                        | 0.568                          | 965.89             | 548.33             | 0.262                          | 832.08             | 218.07             |
| A_68_P22342446 | chr3:94944251-94944296                            | NM_027206:2009           | Tnfrsf8l2     | INSIDE                 | 0.462                                                        | 3.566                          | 1855.17            | 6614.92            | 1.649                          | 1356.31            | 2235.99            |
| A_68_P28573970 | chr12:81233412-81233456                           | NR_033514:397            | 2310015A10Rik | INSIDE                 | 0.461                                                        | 0.637                          | 1584.81            | 1008.89            | 0.293                          | 1205.71            | 353.78             |
| A_68_P25265480 | chr7:87377466-87377510                            | NM_011870:14             | Cib1          | INSIDE                 | 0.461                                                        | 0.745                          | 3446.33            | 2567.13            | 0.344                          | 2908.06            | 999.31             |
| A_68_P31150248 | chr17:33855451-33855495                           | NM_145486:143            | Marchf2       | INSIDE                 | 0.461                                                        | 0.518                          | 1175.41            | 608.38             | 0.239                          | 1107.68            | 264.24             |
| A_68_P31411711 | chr17:86014433-86014477                           | NR_038085:3282           | Six3os1       | INSIDE                 | 0.461                                                        | 0.645                          | 1685.01            | 1087.39            | 0.297                          | 1367.96            | 406.57             |
| A_68_P22336405 | chr3:93249236-93249280                            | NM_001163098:3007        | Tchh          | INSIDE                 | 0.461                                                        | 0.638                          | 1908.11            | 1216.85            | 0.294                          | 1482.56            | 435.74             |
| A_68_P30534541 | chr16:8831297-8831343                             | NM_001081400:1128        | 1810013L24Rik | INSIDE                 | 0.460                                                        | 0.671                          | 952.04             | 638.54             | 0.309                          | 786.53             | 242.84             |
| A_68_P27894430 | chr11:69154065-69154109                           | NR_027827:-184           | A030009H04Rik | PROMOTER               | 0.460                                                        | 0.634                          | 885.96             | 561.45             | 0.291                          | 805.19             | 234.60             |
| A_68_P22058283 | chr3:36374398-36374443                            | NM_009673:389            | Anxa5         | INSIDE                 | 0.460                                                        | 0.527                          | 1028.66            | 542.16             | 0.243                          | 753.08             | 182.64             |
| A_68_P33016567 | chr7:3424267-3424311                              | NM_133183:-1134          | Caeng6        | PROMOTER               | 0.460                                                        | 0.707                          | 1435.58            | 1015.24            | 0.325                          | 1202.52            | 391.28             |
| A_68_P26346391 | chr9:21095271-21095315                            | NM_009878:361            | Cdkn2d        | INSIDE                 | 0.460                                                        | 0.729                          | 2772.31            | 2022.37            | 0.336                          | 2033.06            | 682.14             |
| A_68_P25416680 | chr7:118172636-118172680                          | NM_009431:194            | Ctr9          | INSIDE                 | 0.460                                                        | 0.650                          | 2433.92            | 1581.60            | 0.299                          | 1903.35            | 569.24             |
| A_68_P26893206 | chr9:123022552-123022596                          | NM_001081188:226         | Exosc7        | INSIDE                 | 0.460                                                        | 0.574                          | 1057.47            | 606.69             | 0.264                          | 795.13             | 209.92             |
| A_68_P22149457 | chr3:54539042-54539086                            | NM_001163570:222         | Exosc8        | INSIDE                 | 0.460                                                        | 0.630                          | 1649.62            | 1039.92            | 0.290                          | 1283.20            | 372.50             |
| A_68_P24084080 | chr5:129107459-129107503                          | NM_175284:500            | Fzd10         | INSIDE                 | 0.460                                                        | 0.627                          | 951.34             | 596.55             | 0.289                          | 832.58             | 240.41             |
| A_68_P28989503 | chr13:43398780-43398824                           | NM_001033399:739         | Gfod1         | INSIDE                 | 0.460                                                        | 0.576                          | 954.66             | 549.71             | 0.265                          | 777.04             | 205.71             |
| A_68_P22767952 | chr4:19968906-19968950                            | NM_010281:-270           | Ggh           | PROMOTER               | 0.460                                                        | 0.505                          | 1565.98            | 790.84             | 0.232                          | 1284.93            | 298.32             |
| A_68_P21339129 | chr2:74565400-74565445                            | NM_010469:5388           | Hoxd4         | INSIDE                 | 0.460                                                        | 0.542                          | 1058.17            | 574.00             | 0.250                          | 952.19             | 237.60             |
| A_68_P27956333 | chr11:80593206-80593250                           | NM_177390:299            | Myo1d         | INSIDE                 | 0.460                                                        | 0.582                          | 1144.28            | 666.42             | 0.268                          | 911.42             | 244.25             |
| A_68_P22129479 | chr3:51212850-51212894                            | NM_025523:5              | Ndufc1        | INSIDE                 | 0.460                                                        | 0.562                          | 1329.95            | 747.02             | 0.258                          | 1022.55            | 264.13             |
| A_68_P24981705 | chr7:17060954-17060998                            | NM_008718:1153           | Npas1         | INSIDE                 | 0.460                                                        | 0.485                          | 3392.34            | 1645.38            | 0.223                          | 2717.13            | 606.84             |
| A_68_P26640630 | chr9:74711042-74711086                            | NM_008262:1337           | Onecut1       | INSIDE                 | 0.460                                                        | 0.364                          | 1579.97            | 575.84             | 0.167                          | 1299.53            | 217.67             |
| A_68_P29480406 | chr14:26722448-26722492                           | NM_207229:-91            | Plac9         | PROMOTER               | 0.460                                                        | 0.565                          | 3136.69            | 1773.15            | 0.260                          | 2624.34            | 681.90             |
| A_68_P24991720 | chr7:19734447-19734491                            | NM_026111:77             | Qpct1         | INSIDE                 | 0.460                                                        | 0.398                          | 1844.63            | 734.75             | 0.183                          | 1385.49            | 253.69             |
| A_68_P27540138 | chr10:127650212-127650256                         | NM_025716:-1384          | Spryd4        | PROMOTER               | 0.460                                                        | 0.631                          | 1205.34            | 761.02             | 0.290                          | 963.34             | 279.75             |
| A_68_P30350971 | chr15:76701517-76701566                           | NM_001007568:324         | Zfp251        | INSIDE                 | 0.460                                                        | 0.482                          | 1470.61            | 708.58             | 0.222                          | 1068.10            | 236.65             |
| A_68_P30345601 | chr15:75865270-75865314                           | ENSMUST00000100531:25794 |               | INSIDE                 | 0.460                                                        | 1.432                          | 1031.41            | 1477.28            | 0.659                          | 983.97             | 648.22             |
| A_68_P31936460 | chr19:6930124-6930168                             | NM_001081291:2555        | Ccdc88b       | INSIDE                 | 0.459                                                        | 0.654                          | 2669.86            | 1745.79            | 0.300                          | 2085.51            | 626.56             |

| ProbeName      | Target position of probe on CpG island microarray | TargetID           | GeneSymbol    | CpG island Description | Ratio of relative methylation (TiO <sub>2</sub> -NP/Vehicle) | Sham group                     |                    |                    | TiO <sub>2</sub> -H group      |                    |                    |
|----------------|---------------------------------------------------|--------------------|---------------|------------------------|--------------------------------------------------------------|--------------------------------|--------------------|--------------------|--------------------------------|--------------------|--------------------|
|                |                                                   |                    |               |                        |                                                              | Relative methylation (Cy5/Cy3) | Cy3 signal (Input) | Cy5 signal (MeDIP) | Relative methylation (Cy5/Cy3) | Cy3 signal (Input) | Cy5 signal (MeDIP) |
| A_68_P31619631 | chr18:35862603-35862647                           | NM_029669:174      | Dnajc18       | INSIDE                 | 0.459                                                        | 0.616                          | 1100.69            | 677.79             | 0.283                          | 794.98             | 224.68             |
| A_68_P22311355 | chr3:87827371-87827415                            | NM_022031:4041     | Hapln2        | INSIDE                 | 0.459                                                        | 0.567                          | 2341.18            | 1326.68            | 0.260                          | 1900.76            | 493.92             |
| A_68_P23349538 | chr4:138631686-138631730                          | NM_021358:-1004    | Htr6          | PROMOTER               | 0.459                                                        | 0.532                          | 1016.76            | 540.52             | 0.244                          | 826.12             | 201.40             |
| A_68_P31601053 | chr18:32227655-32227699                           | NM_173441:289      | Iws1          | INSIDE                 | 0.459                                                        | 0.618                          | 1034.83            | 640.04             | 0.284                          | 873.82             | 248.01             |
| A_68_P20739566 | chr1:157584400-157584444                          | NM_010712:4735     | Lhx4          | INSIDE                 | 0.459                                                        | 0.420                          | 2129.12            | 894.97             | 0.193                          | 1586.13            | 306.27             |
| A_68_P30423403 | chr15:88970637-88970681                           | NM_013871:475      | Mapk12        | INSIDE                 | 0.459                                                        | 0.565                          | 1890.77            | 1067.54            | 0.259                          | 1426.09            | 369.87             |
| A_68_P31934033 | chr19:6335488-6335532                             | NM_001168490:472   | Men1          | INSIDE                 | 0.459                                                        | 0.544                          | 2134.24            | 1160.38            | 0.250                          | 1686.74            | 421.39             |
| A_68_P30295270 | chr15:66800532-66800576                           | NM_008681:649      | Ndrng1        | INSIDE                 | 0.459                                                        | 0.395                          | 1964.70            | 775.97             | 0.181                          | 1550.23            | 280.93             |
| A_68_P22558741 | chr3:136333499-136333554                          | NM_008913:-207     | Ppp3ca        | PROMOTER               | 0.459                                                        | 3.774                          | 706.40             | 2666.24            | 1.734                          | 568.58             | 985.80             |
| A_68_P25962573 | chr8:75247186-75247230                            | NM_001113248:22    | Sin3b         | INSIDE                 | 0.459                                                        | 0.500                          | 3570.22            | 1785.07            | 0.230                          | 2824.00            | 648.27             |
| A_68_P20599492 | chr1:130141015-130141059                          | NM_026390:279      | Ubxn4         | INSIDE                 | 0.459                                                        | 0.650                          | 4640.72            | 3016.78            | 0.299                          | 3399.53            | 1014.81            |
| A_68_P22727922 | chr4:11003062-11003106                            | NM_001085493:267   | 2310030N02Rik | INSIDE                 | 0.458                                                        | 0.608                          | 1158.70            | 704.54             | 0.279                          | 1073.45            | 299.16             |
| A_68_P22346423 | chr3:95733097-95733141                            | NM_023210:-61      | Anp32e        | PROMOTER               | 0.458                                                        | 0.579                          | 1126.65            | 652.73             | 0.265                          | 910.30             | 241.52             |
| A_68_P26345696 | chr9:20954248-20954292                            | NM_016742:80       | Cdc37         | INSIDE                 | 0.458                                                        | 0.666                          | 1284.61            | 855.41             | 0.305                          | 942.60             | 287.57             |
| A_68_P27176094 | chr10:60149519-60149563                           | NM_023370:9698     | Cdh23         | INSIDE                 | 0.458                                                        | 0.684                          | 2090.96            | 1430.59            | 0.313                          | 1654.88            | 518.23             |
| A_68_P22071613 | chr3:38786725-38786769                            | NM_183221:885      | Fat4          | INSIDE                 | 0.458                                                        | 0.447                          | 1492.68            | 666.98             | 0.205                          | 1218.04            | 249.52             |
| A_68_P29531954 | chr14:35633533-35633577                           | NM_008166:233      | Grid1         | INSIDE                 | 0.458                                                        | 0.386                          | 1652.93            | 637.33             | 0.177                          | 1325.29            | 234.11             |
| A_68_P25511565 | chr7:135754795-135754839                          | NM_178641:-62      | Inpp5f        | PROMOTER               | 0.458                                                        | 1.619                          | 4253.80            | 6888.80            | 0.741                          | 2914.50            | 2160.59            |
| A_68_P21495934 | chr2:105512616-105512660                          | NR_002867:-2151    | Pax6os1       | DIVERGENT_PROMOTER     | 0.458                                                        | 0.519                          | 1891.55            | 980.89             | 0.238                          | 1399.98            | 332.81             |
| A_68_P28041052 | chr11:95692092-95692136                           | NM_153104:6301     | Phospho1      | INSIDE                 | 0.458                                                        | 0.647                          | 1197.54            | 774.64             | 0.296                          | 953.21             | 282.31             |
| A_68_P23239474 | chr4:117963100-117963144                          | NM_011213:880      | Ptprf         | INSIDE                 | 0.458                                                        | 0.464                          | 2532.80            | 1174.08            | 0.212                          | 1971.67            | 418.30             |
| A_68_P27924763 | chr11:75006899-75006943                           | NM_177708:-574     | Rtn4rl1       | DIVERGENT_PROMOTER     | 0.458                                                        | 0.689                          | 3535.73            | 2436.76            | 0.316                          | 2509.06            | 792.08             |
| A_68_P23195471 | chr4:108000991-108001035                          | NM_027250:256      | 2010305A19Rik | INSIDE                 | 0.457                                                        | 0.734                          | 5938.42            | 4356.88            | 0.336                          | 4483.10            | 1504.40            |
| A_68_P31864632 | chr18:80665927-80665971                           | NM_026295:458      | Ctdp1         | INSIDE                 | 0.457                                                        | 0.543                          | 2390.19            | 1297.01            | 0.248                          | 1893.54            | 469.66             |
| A_68_P20831244 | chr1:174078454-174078498                          | NM_153555:331      | Deaf8         | INSIDE                 | 0.457                                                        | 0.637                          | 1517.09            | 966.18             | 0.291                          | 1265.46            | 368.01             |
| A_68_P30672033 | chr16:35768842-35768886                           | NM_153550:578      | Dire2         | INSIDE                 | 0.457                                                        | 0.605                          | 1297.65            | 785.52             | 0.277                          | 1184.21            | 327.64             |
| A_68_P22407676 | chr3:107434272-107434316                          | NM_153563:334      | Fam40a        | INSIDE                 | 0.457                                                        | 0.655                          | 836.35             | 548.10             | 0.299                          | 731.28             | 218.93             |
| A_68_P24533907 | chr6:70906387-70906431                            | NM_001101464:-191  | Foxi3         | PROMOTER               | 0.457                                                        | 0.683                          | 5098.82            | 3483.92            | 0.313                          | 3316.49            | 1036.53            |
| A_68_P30503777 | chr15:103196605-103196649                         | NM_010577:553      | Irga5         | INSIDE                 | 0.457                                                        | 0.686                          | 1752.04            | 1201.09            | 0.314                          | 1377.01            | 431.76             |
| A_68_P23156636 | chr4:101390083-101390127                          | NM_010704:93       | Lepr          | INSIDE                 | 0.457                                                        | 0.542                          | 1020.14            | 552.64             | 0.247                          | 822.63             | 203.49             |
| A_68_P24424404 | chr6:47763266-47763310                            | NR_030485:9637     | Mir704        | PROMOTER               | 0.457                                                        | 0.621                          | 1463.61            | 908.59             | 0.284                          | 1072.58            | 304.09             |
| A_68_P30369725 | chr15:79844779-79844823                           | NM_011057:438      | Pdgbf         | INSIDE                 | 0.457                                                        | 0.450                          | 1476.58            | 664.16             | 0.206                          | 1097.39            | 225.69             |
| A_68_P28741728 | chr12:112276886-112276930                         | NM_198023:-1100    | Rcor1         | PROMOTER               | 0.457                                                        | 0.494                          | 1409.67            | 696.75             | 0.226                          | 1096.84            | 247.53             |
| A_68_P29700849 | chr14:70750941-70750985                           | NM_001135152:-2722 | Slc39a14      | PROMOTER               | 0.457                                                        | 0.737                          | 2377.00            | 1752.80            | 0.337                          | 1666.45            | 561.36             |
| A_68_P26578203 | chr9:63605811-63605855                            | NM_016769:-31      | Smad3         | PROMOTER               | 0.457                                                        | 0.727                          | 3276.63            | 2383.28            | 0.332                          | 2138.08            | 710.59             |
| A_68_P23395556 | chr4:148000439-148000483                          | NM_001003898:645   | Tardbp        | INSIDE                 | 0.457                                                        | 0.400                          | 1581.02            | 632.18             | 0.183                          | 1092.36            | 199.45             |
| A_68_P21266443 | chr2:61650440-61650484                            | NM_009322:7953     | Tbr1          | INSIDE                 | 0.457                                                        | 0.568                          | 1269.99            | 721.43             | 0.260                          | 934.88             | 242.89             |
| A_68_P32709178 | chrX:139116482-139116526                          | NM_001199360:236   | Tmem164       | INSIDE                 | 0.457                                                        | 1.485                          | 2611.94            | 3879.23            | 0.678                          | 1209.09            | 820.00             |
| A_68_P22324425 | chr3:90097634-90097678                            | AK015985:249       |               | INSIDE                 | 0.457                                                        | 0.629                          | 1415.22            | 890.87             | 0.288                          | 1161.57            | 334.38             |
| A_68_P21755516 | chr2:153356263-153356307                          | NM_001134300:-577  | 8430427H17Rik | PROMOTER               | 0.456                                                        | 0.516                          | 1139.99            | 587.97             | 0.235                          | 889.87             | 209.24             |
| A_68_P30646211 | chr16:31200561-31200605                           | NM_030138:742      | Acap2         | INSIDE                 | 0.456                                                        | 0.483                          | 2455.17            | 1186.49            | 0.220                          | 1973.96            | 434.60             |
| A_68_P25954408 | chr8:73363586-73363630                            | NM_027560:11       | Ardec2        | INSIDE                 | 0.456                                                        | 0.684                          | 1297.47            | 887.59             | 0.312                          | 956.10             | 298.18             |
| A_68_P21094142 | chr2:28771352-28771396                            | NM_019446:567      | Barhl1        | INSIDE                 | 0.456                                                        | 0.532                          | 2671.45            | 1421.37            | 0.243                          | 1808.28            | 438.59             |
| A_68_P26402553 | chr9:31721424-31721468                            | NM_013800:-576     | Barx2         | PROMOTER               | 0.456                                                        | 0.621                          | 2599.53            | 1613.81            | 0.283                          | 2212.96            | 626.13             |
| A_68_P31947333 | chr19:9973849-9973893                             | NM_016692:153      | Incenp        | INSIDE                 | 0.456                                                        | 0.477                          | 1230.50            | 586.85             | 0.218                          | 1017.30            | 221.28             |
| A_68_P21614869 | chr2:127481863-127481907                          | NM_0011171187:547  | Mal           | INSIDE                 | 0.456                                                        | 0.626                          | 1145.91            | 717.62             | 0.286                          | 964.41             | 275.64             |
| A_68_P31126966 | chr17:29400812-29400856                           | NM_026845:82       | Ppil1         | INSIDE                 | 0.456                                                        | 0.638                          | 856.35             | 546.57             | 0.291                          | 691.51             | 201.38             |
| A_68_P24983572 | chr7:17428015-17428059                            | NM_178900:-377     | Prkd2         | PROMOTER               | 0.456                                                        | 0.494                          | 2352.31            | 1161.71            | 0.225                          | 1719.73            | 387.17             |
| A_68_P24617030 | chr6:87540705-87540749                            | NM_021381:-31      | Prokr1        | PROMOTER               | 0.456                                                        | 0.625                          | 3507.50            | 2192.63            | 0.285                          | 2620.70            | 747.45             |
| A_68_P21740962 | chr2:150612685-150612729                          | NM_153781:175      | Pygb          | INSIDE                 | 0.456                                                        | 0.406                          | 1854.77            | 752.86             | 0.185                          | 1403.78            | 259.68             |
| A_68_P25378793 | chr7:109590580-109590624                          | NM_009103:394      | Rrm1          | INSIDE                 | 0.456                                                        | 0.540                          | 6626.39            | 3578.50            | 0.246                          | 4678.80            | 1151.19            |

| ProbeName      | Target position of probe on CpG island microarray | TargetID                 | GeneSymbol    | CpG island Description | Ratio of relative methylation (TiO <sub>2</sub> -NP/Vehicle) | Sham group                     |                    |                    | TiO <sub>2</sub> -H group      |                    |                    |
|----------------|---------------------------------------------------|--------------------------|---------------|------------------------|--------------------------------------------------------------|--------------------------------|--------------------|--------------------|--------------------------------|--------------------|--------------------|
|                |                                                   |                          |               |                        |                                                              | Relative methylation (Cy5/Cy3) | Cy3 signal (Input) | Cy5 signal (MeDIP) | Relative methylation (Cy5/Cy3) | Cy3 signal (Input) | Cy5 signal (MeDIP) |
| A_68_P26809364 | chr9:107437458-107437502                          | NM_019704:1205           | Tmem115       | INSIDE                 | 0.456                                                        | 0.565                          | 1452.86            | 820.34             | 0.258                          | 1061.04            | 273.42             |
| A_68_P27836025 | chr11:59103487-59103531                           | NM_009522:745            | Wnt3a         | INSIDE                 | 0.456                                                        | 0.276                          | 2543.26            | 702.85             | 0.126                          | 2027.03            | 255.69             |
| A_68_P26342513 | chr9:20264224-20264268                            | NM_011753:358            | Zfp26         | INSIDE                 | 0.456                                                        | 0.465                          | 1580.60            | 735.40             | 0.212                          | 1286.51            | 272.85             |
| A_68_P27534361 | chr10:126607747-126607791                         | NM_027739:4882           | B4galnt1      | INSIDE                 | 0.455                                                        | 0.603                          | 1381.62            | 833.06             | 0.274                          | 1141.31            | 312.97             |
| A_68_P28959954 | chr13:38438568-38438612                           | NM_007556:1006           | Bmp6          | INSIDE                 | 0.455                                                        | 0.672                          | 2248.38            | 1510.00            | 0.306                          | 1846.10            | 564.08             |
| A_68_P31144187 | chr17:32326072-32326116                           | NM_001033163:314         | Ephx3         | INSIDE                 | 0.455                                                        | 0.659                          | 856.19             | 564.20             | 0.300                          | 710.80             | 212.91             |
| A_68_P30988901 | chr16:95923763-95923807                           | NM_011809:-229           | Ets2          | PROMOTER               | 0.455                                                        | 0.704                          | 1608.77            | 1131.97            | 0.320                          | 1315.41            | 421.38             |
| A_68_P32117993 | chr19:42007635-42007679                           | NM_001164561:148         | Exosc1        | INSIDE                 | 0.455                                                        | 0.493                          | 1540.43            | 759.64             | 0.225                          | 1328.72            | 298.39             |
| A_68_P28540453 | chr12:75008595-75008639                           | NM_010431:-237           | Hif1a         | PROMOTER               | 0.455                                                        | 0.537                          | 1693.26            | 909.27             | 0.244                          | 1303.66            | 318.38             |
| A_68_P30348596 | chr15:76307956-76308000                           | NM_008296:104            | Hsfl          | INSIDE                 | 0.455                                                        | 0.471                          | 2542.92            | 1197.92            | 0.214                          | 2038.31            | 437.16             |
| A_68_P24117359 | chr5:136164594-136164638                          | NM_008898:-467           | Por           | PROMOTER               | 0.455                                                        | 0.638                          | 1615.63            | 1031.25            | 0.291                          | 1284.71            | 373.31             |
| A_68_P21101128 | chr2:29921642-29921686                            | NM_001204875:-329        | Set           | PROMOTER               | 0.455                                                        | 1.532                          | 2617.19            | 4010.37            | 0.697                          | 1966.23            | 1369.69            |
| A_68_P30574557 | chr16:17576828-17576872                           | NM_144852:-86            | Slc7a4        | PROMOTER               | 0.455                                                        | 0.647                          | 1637.39            | 1060.01            | 0.295                          | 1311.48            | 386.28             |
| A_68_P27294068 | chr10:82322231-82322275                           | NM_001042514:-833        | Txnd1         | PROMOTER               | 0.455                                                        | 0.527                          | 1103.64            | 581.49             | 0.240                          | 897.92             | 215.07             |
| A_68_P24974109 | chr7:13593102-13593146                            | NM_001024699:2025        | Zbtb45        | INSIDE                 | 0.455                                                        | 4.787                          | 1387.92            | 6643.87            | 2.179                          | 1483.31            | 3232.05            |
| A_68_P24128899 | chr5:138558291-138558335                          | NM_001044703:180         | Zscan21       | INSIDE                 | 0.455                                                        | 0.563                          | 2698.96            | 1520.41            | 0.256                          | 2005.35            | 514.03             |
| A_68_P32537730 | chrX:91423475-91423519                            |                          |               | Unknown                | 0.455                                                        | 0.381                          | 2836.08            | 1079.72            | 0.173                          | 1399.97            | 242.55             |
| A_68_P23339579 | chr4:136944180-136944224                          | ENSMUST00000078305:-7005 |               | PROMOTER               | 0.455                                                        | 0.576                          | 2205.65            | 1269.81            | 0.262                          | 1709.42            | 448.02             |
| A_68_P20714686 | chr1:153275868-153275912                          | NM_026876:113            | 1190005F20Rik | INSIDE                 | 0.454                                                        | 0.485                          | 2219.62            | 1075.83            | 0.220                          | 1708.71            | 376.26             |
| A_68_P28566337 | chr12:79962384-79962437                           | NM_023721:215            | Atp6v1d       | INSIDE                 | 0.454                                                        | 0.573                          | 1049.72            | 601.31             | 0.260                          | 785.99             | 204.55             |
| A_68_P21425372 | chr2:91762936-91762980                            | NM_007699:613            | Chrm4         | INSIDE                 | 0.454                                                        | 0.711                          | 1921.16            | 1365.93            | 0.323                          | 1516.66            | 489.31             |
| A_68_P26170772 | chr8:114414651-114414695                          | NM_019950:19427          | Chst5         | INSIDE                 | 0.454                                                        | 1.456                          | 1248.02            | 1817.02            | 0.660                          | 1085.04            | 716.47             |
| A_68_P22614659 | chr3:146113265-146113309                          | NM_028836:-170           | Ctbs          | PROMOTER               | 0.454                                                        | 0.492                          | 1523.72            | 748.91             | 0.223                          | 1212.16            | 270.64             |
| A_68_P26135758 | chr8:108282379-108282423                          | NM_027469:107            | Gfod2         | INSIDE                 | 0.454                                                        | 0.610                          | 1234.17            | 753.37             | 0.277                          | 938.18             | 259.84             |
| A_68_P23329301 | chr4:135126386-135126430                          | NM_001013756:3127        | Grhl3         | INSIDE                 | 0.454                                                        | 0.536                          | 1452.22            | 779.08             | 0.243                          | 1232.79            | 300.01             |
| A_68_P28382007 | chr12:41750810-41750854                           | NM_053122:156            | Impmp2l       | INSIDE                 | 0.454                                                        | 0.572                          | 2021.80            | 1155.65            | 0.260                          | 1681.86            | 436.50             |
| A_68_P32029540 | chr19:25484871-25484921                           | NM_181404:173205         | Kank1         | INSIDE                 | 0.454                                                        | 3.394                          | 1099.41            | 3731.11            | 1.542                          | 863.42             | 1331.51            |
| A_68_P27285553 | chr10:80260510-80260554                           | NM_023900:839            | Plekhl1       | INSIDE                 | 0.454                                                        | 0.603                          | 2912.80            | 1757.28            | 0.274                          | 2105.75            | 576.33             |
| A_68_P24126056 | chr5:137943558-137943602                          | NM_028753:77             | Pop7          | INSIDE                 | 0.454                                                        | 0.587                          | 983.88             | 578.02             | 0.267                          | 845.07             | 225.53             |
| A_68_P21637466 | chr2:131735690-131735734                          | NM_011170:49             | Prnp          | INSIDE                 | 0.454                                                        | 0.529                          | 1511.50            | 800.01             | 0.240                          | 1246.66            | 299.47             |
| A_68_P28190286 | chr11:121249176-121249220                         | NM_139147:367            | Rab40b        | INSIDE                 | 0.454                                                        | 0.532                          | 1436.73            | 764.37             | 0.242                          | 1136.18            | 274.43             |
| A_68_P27968801 | chr11:82684323-82684367                           | NM_001164570:-98         | Rfl1          | PROMOTER               | 0.454                                                        | 0.455                          | 1610.47            | 732.36             | 0.207                          | 1231.36            | 254.43             |
| A_68_P21820737 | chr2:164786214-164786258                          | NM_020333:-7251          | Slc12a5       | PROMOTER               | 0.454                                                        | 0.449                          | 1368.56            | 615.03             | 0.204                          | 1130.89            | 230.65             |
| A_68_P30507721 | chr16:4003615-4003659                             | NM_177472:-1956          | Slx4          | PROMOTER               | 0.454                                                        | 0.362                          | 1657.73            | 600.28             | 0.164                          | 1289.18            | 211.83             |
| A_68_P21101536 | chr2:29989398-29989442                            | NM_146252:30             | Tbc1d13       | INSIDE                 | 0.454                                                        | 0.639                          | 1289.64            | 824.39             | 0.290                          | 948.16             | 275.09             |
| A_68_P27083334 | chr10:40022291-40022335                           | NM_009665:-318           | Amd1          | PROMOTER               | 0.453                                                        | 0.540                          | 1626.28            | 877.98             | 0.245                          | 1254.26            | 306.87             |
| A_68_P30641650 | chr16:30388204-30388248                           | NM_001128094:390         | Atp13a3       | INSIDE                 | 0.453                                                        | 0.669                          | 2570.18            | 1719.18            | 0.303                          | 1876.88            | 568.63             |
| A_68_P30589167 | chr16:20716459-20716503                           | NM_009900:229            | Cln2          | INSIDE                 | 0.453                                                        | 0.662                          | 2648.65            | 1752.21            | 0.299                          | 2376.23            | 711.54             |
| A_68_P31330088 | chr17:71012118-71012162                           | NM_001128181:101054      | Dlgap1        | INSIDE                 | 0.453                                                        | 1.496                          | 2328.12            | 3482.04            | 0.678                          | 1758.63            | 1192.07            |
| A_68_P30180493 | chr15:44259134-44259178                           | NM_175009:-500           | Eny2          | PROMOTER               | 0.453                                                        | 0.422                          | 1473.45            | 621.13             | 0.191                          | 1181.77            | 225.44             |
| A_68_P28120311 | chr11:109583661-109583705                         | NM_153782:-112           | Fam20a        | PROMOTER               | 0.453                                                        | 0.419                          | 1787.46            | 748.26             | 0.190                          | 1397.89            | 265.27             |
| A_68_P29410630 | chr14:13173724-13173771                           | NM_080433:4632           | Fezl2         | DOWNSTREAM             | 0.453                                                        | 0.655                          | 1059.17            | 693.65             | 0.296                          | 846.28             | 250.92             |
| A_68_P31863131 | chr18:80433374-80433418                           | NM_001136181:10445       | Hsbp1l1       | INSIDE                 | 0.453                                                        | 0.493                          | 1290.37            | 635.51             | 0.223                          | 987.13             | 220.39             |
| A_68_P24905346 | chr6:142519942-142519986                          | NM_008428:-88            | Kcnj8         | PROMOTER               | 0.453                                                        | 0.725                          | 1854.73            | 1345.34            | 0.328                          | 1478.94            | 485.44             |
| A_68_P31516117 | chr18:15308896-15308940                           | NM_134112:1037           | Ketd1         | INSIDE                 | 0.453                                                        | 0.679                          | 1313.21            | 891.68             | 0.307                          | 1025.35            | 315.20             |
| A_68_P26716009 | chr9:90009071-90009118                            | NM_001039147:564         | Morf4l1       | INSIDE                 | 0.453                                                        | 0.666                          | 964.42             | 642.65             | 0.302                          | 718.09             | 216.88             |
| A_68_P22317892 | chr3:89018127-89018171                            | NM_001161824:109         | Mtx1          | INSIDE                 | 0.453                                                        | 0.623                          | 1854.34            | 1155.55            | 0.282                          | 1487.06            | 419.54             |
| A_68_P30961940 | chr16:91269862-91269906                           | NM_016968:-129           | Olig1         | PROMOTER               | 0.453                                                        | 0.521                          | 1364.64            | 711.16             | 0.236                          | 1158.15            | 273.66             |
| A_68_P22878366 | chr4:44676950-44676994                            | NM_008782:46340          | Pax5          | INSIDE                 | 0.453                                                        | 0.427                          | 2104.81            | 898.28             | 0.193                          | 1633.81            | 316.01             |
| A_68_P26345767 | chr9:20969656-20969700                            | NM_183408:-479           | Pde4a         | PROMOTER               | 0.453                                                        | 0.615                          | 2161.01            | 1329.88            | 0.279                          | 1648.17            | 459.14             |
| A_68_P28197877 | chr12:3960273-3960317                             | NM_008895:5344           | Pome          | INSIDE                 | 0.453                                                        | 0.503                          | 2050.65            | 1031.25            | 0.228                          | 1527.45            | 347.64             |

| ProbeName      | Target position of probe on CpG island microarray | TargetID                | GeneSymbol    | CpG island Description | Ratio of relative methylation (TiO <sub>2</sub> -NP/Vehicle) | Sham group                     |                    |                    | TiO <sub>2</sub> -H group      |                    |                    |
|----------------|---------------------------------------------------|-------------------------|---------------|------------------------|--------------------------------------------------------------|--------------------------------|--------------------|--------------------|--------------------------------|--------------------|--------------------|
|                |                                                   |                         |               |                        |                                                              | Relative methylation (Cy5/Cy3) | Cy3 signal (Input) | Cy5 signal (MeDIP) | Relative methylation (Cy5/Cy3) | Cy3 signal (Input) | Cy5 signal (MeDIP) |
| A_68_P28738223 | chr12:111685895-111685939                         | NM_001135001:528        | Ppp2r5c       | INSIDE                 | 0.453                                                        | 0.484                          | 1922.49            | 930.95             | 0.219                          | 1473.75            | 323.19             |
| A_68_P28186389 | chr11:120582623-120582667                         | NM_133223:-137          | Rac3          | PROMOTER               | 0.453                                                        | 0.512                          | 2079.93            | 1065.18            | 0.232                          | 1557.23            | 361.05             |
| A_68_P22958420 | chr4:59819277-59819321                            | NM_172468:777           | Snx30         | INSIDE                 | 0.453                                                        | 0.594                          | 1284.35            | 762.54             | 0.269                          | 988.56             | 265.67             |
| A_68_P26717019 | chr9:90165367-90165411                            | NM_194334:219           | Tbc1d2b       | INSIDE                 | 0.453                                                        | 0.582                          | 1498.80            | 872.68             | 0.264                          | 1262.42            | 332.92             |
| A_68_P20052698 | chr1:15795876-15795920                            | NM_009352:160           | Terf1         | INSIDE                 | 0.453                                                        | 0.461                          | 1961.90            | 903.56             | 0.209                          | 1491.05            | 311.09             |
| A_68_P29569510 | chr14:45839181-45839225                           | NM_172597:-133          | Txndc16       | DIVERGENT_PROMOTER     | 0.453                                                        | 0.628                          | 1068.30            | 671.23             | 0.284                          | 530.92             | 150.99             |
| A_68_P23400518 | chr4:148800981-148801025                          | NM_022022:-262          | Ube4b         | PROMOTER               | 0.453                                                        | 0.412                          | 1376.42            | 567.31             | 0.187                          | 1115.89            | 208.26             |
| A_68_P26158468 | chr8:112217560-112217604                          | NM_028018:-388          | 2400003C14Rik | PROMOTER               | 0.452                                                        | 0.537                          | 1559.31            | 838.02             | 0.243                          | 1307.15            | 317.74             |
| A_68_P29086263 | chr13:60704015-60704059                           | NM_134062:465           | Dapk1         | INSIDE                 | 0.452                                                        | 0.621                          | 1345.19            | 834.79             | 0.281                          | 1021.44            | 286.60             |
| A_68_P20351170 | chr1:74947336-74947380                            | NR_029876:-63           | Mir375        | PROMOTER               | 0.452                                                        | 0.411                          | 2496.18            | 1026.47            | 0.186                          | 2081.25            | 386.55             |
| A_68_P26224549 | chr8:123632350-123632394                          | NM_001166482:-93        | Mthfsd        | DIVERGENT_PROMOTER     | 0.452                                                        | 0.640                          | 1591.65            | 1018.46            | 0.289                          | 1282.58            | 371.18             |
| A_68_P27280977 | chr10:79565295-79565339                           | NM_183426:131           | Sbno2         | INSIDE                 | 0.452                                                        | 0.463                          | 3369.65            | 1558.55            | 0.209                          | 2384.72            | 498.98             |
| A_68_P26084862 | chr8:98240139-98240183                            | NM_001035123:348        | Setd6         | INSIDE                 | 0.452                                                        | 0.669                          | 1856.95            | 1242.26            | 0.303                          | 1431.39            | 433.21             |
| A_68_P26142250 | chr8:109460044-109460088                          | NM_009229:417           | Sntb2         | INSIDE                 | 0.452                                                        | 0.514                          | 1474.45            | 758.31             | 0.233                          | 1244.93            | 289.51             |
| A_68_P27542562 | chr10:128106343-128106387                         | NM_173733:4610          | Suox          | DOWNSTREAM             | 0.452                                                        | 0.510                          | 1549.51            | 790.34             | 0.231                          | 1277.90            | 294.62             |
| A_68_P24994892 | chr7:20301207-20301251                            | NM_001109748:-450       | Tomm40        | PROMOTER               | 0.452                                                        | 0.561                          | 1535.10            | 861.57             | 0.254                          | 1025.67            | 305.93             |
| A_68_P21579905 | chr2:121097022-121097066                          | NM_013735:78            | Trp53bp1      | INSIDE                 | 0.452                                                        | 0.566                          | 2441.59            | 1381.63            | 0.256                          | 2012.26            | 514.89             |
| A_68_P21092313 | chr2:28496774-28496818                            | NM_022887:34            | Tsc1          | INSIDE                 | 0.452                                                        | 0.459                          | 1582.59            | 726.76             | 0.208                          | 1399.56            | 290.56             |
| A_68_P24002095 | chr5:114581570-114581614                          | NM_011677:428           | Ung           | INSIDE                 | 0.452                                                        | 0.669                          | 1632.59            | 1092.65            | 0.303                          | 1191.18            | 360.56             |
| A_68_P24992403 | chr7:19857732-19857776                            | NM_009499:-551          | Vasp          | PROMOTER               | 0.452                                                        | 0.450                          | 2584.13            | 1162.00            | 0.203                          | 1938.30            | 393.84             |
| A_68_P31402642 | chr17:84495931-84495975                           | AK043195:-259           |               | PROMOTER               | 0.452                                                        | 0.713                          | 1365.11            | 972.77             | 0.322                          | 1076.71            | 347.05             |
| A_68_P26003886 | chr8:83866274-83866319                            | ENSMUST00000172167:-158 |               | PROMOTER               | 0.452                                                        | 0.633                          | 1575.62            | 997.33             | 0.286                          | 1059.28            | 302.99             |
| A_68_P25527991 | chr7:138506051-138506095                          | NM_026655:140           | 2310057M21Rik | INSIDE                 | 0.451                                                        | 0.559                          | 1087.60            | 607.53             | 0.252                          | 826.45             | 208.07             |
| A_68_P30150546 | chr15:38591825-38591869                           | NM_025494:188           | Atp6v1c1      | INSIDE                 | 0.451                                                        | 0.473                          | 1277.36            | 604.40             | 0.231                          | 1026.16            | 218.75             |
| A_68_P22893293 | chr4:47221194-47221238                            | NM_009928:333           | Col15a1       | INSIDE                 | 0.451                                                        | 0.710                          | 7261.14            | 5151.80            | 0.320                          | 5222.86            | 1672.20            |
| A_68_P23278939 | chr4:125911753-125911803                          | NM_001145970:21785      | Mtap7d1       | INSIDE                 | 0.451                                                        | 3.465                          | 1273.29            | 4411.55            | 1.561                          | 1031.98            | 1610.84            |
| A_68_P31632701 | chr18:38371127-38371171                           | NM_029357:-1732         | Pcdh1         | PROMOTER               | 0.451                                                        | 0.621                          | 1033.23            | 641.43             | 0.280                          | 816.26             | 228.68             |
| A_68_P25394039 | chr7:112885744-112885788                          | NM_133951:133           | Rrp8          | INSIDE                 | 0.451                                                        | 0.447                          | 1606.94            | 718.98             | 0.202                          | 1312.88            | 264.64             |
| A_68_P23482832 | chr5:12383399-12383443                            | NM_028882:255           | Sema3d        | INSIDE                 | 0.451                                                        | 0.596                          | 900.43             | 536.53             | 0.269                          | 755.21             | 202.92             |
| A_68_P29581357 | chr14:47896981-47897025                           | NM_080843:185           | Socs4         | INSIDE                 | 0.451                                                        | 0.405                          | 1761.55            | 714.21             | 0.183                          | 1369.28            | 250.22             |
| A_68_P21017268 | chr2:13496366-13496411                            | NM_011701:451           | Vim           | INSIDE                 | 0.451                                                        | 0.547                          | 1184.67            | 647.92             | 0.247                          | 982.22             | 242.37             |
| A_68_P27269570 | chr10:77127215-77127259                           |                         |               | Unknown                | 0.451                                                        | 3.138                          | 1643.33            | 5156.80            | 1.414                          | 1093.83            | 1546.98            |
| A_68_P27268621 | chr10:76978260-76978304                           | NM_133998:276           | 1810008A18Rik | INSIDE                 | 0.450                                                        | 0.667                          | 4574.43            | 3053.04            | 0.301                          | 3239.55            | 973.60             |
| A_68_P26217968 | chr8:122638484-122638528                          | NM_001163762:455        | 6430548M08Rik | INSIDE                 | 0.450                                                        | 0.479                          | 1376.07            | 658.56             | 0.216                          | 1101.84            | 237.56             |
| A_68_P21732682 | chr2:148700871-148700915                          | NM_009976:312           | Cst3          | INSIDE                 | 0.450                                                        | 0.434                          | 1634.82            | 709.94             | 0.196                          | 1360.69            | 266.14             |
| A_68_P22592456 | chr3:142428233-142428277                          | NM_145546:44            | Gtf2b         | INSIDE                 | 0.450                                                        | 0.642                          | 847.40             | 544.06             | 0.289                          | 819.62             | 236.77             |
| A_68_P28269095 | chr12:17182821-17182865                           | NM_201531:852           | Kenf1         | INSIDE                 | 0.450                                                        | 0.449                          | 1330.17            | 597.50             | 0.202                          | 1061.87            | 214.59             |
| A_68_P28748127 | chr12:113382080-113382124                         | NM_001097621:-2316      | Kif26a        | PROMOTER               | 0.450                                                        | 0.280                          | 1974.31            | 553.61             | 0.126                          | 1580.17            | 199.56             |
| A_68_P27262214 | chr10:75931729-75931773                           | NM_019434:35            | Mem3ap        | INSIDE                 | 0.450                                                        | 0.287                          | 2471.94            | 708.97             | 0.129                          | 1970.94            | 254.13             |
| A_68_P20413379 | chr1:88566390-88566434                            | NM_010933:736           | Nppe          | INSIDE                 | 0.450                                                        | 0.533                          | 1446.19            | 770.17             | 0.240                          | 1313.60            | 314.67             |
| A_68_P23354457 | chr4:139384411-139384455                          | NM_011039:4451          | Pax7          | INSIDE                 | 0.450                                                        | 0.584                          | 995.36             | 581.26             | 0.263                          | 732.20             | 192.58             |
| A_68_P28451629 | chr12:56499790-56499834                           | NM_011968:1             | PsmA6         | INSIDE                 | 0.450                                                        | 0.659                          | 975.07             | 642.35             | 0.297                          | 837.49             | 248.53             |
| A_68_P22215786 | chr3:68297563-68297607                            | NR_036665:530           | Schip1        | PROMOTER               | 0.450                                                        | 0.428                          | 3152.94            | 1348.73            | 0.193                          | 2472.58            | 476.28             |
| A_68_P25957540 | chr8:74093690-74093734                            | NM_011977:887           | Slc27a1       | INSIDE                 | 0.450                                                        | 0.570                          | 1188.11            | 677.45             | 0.257                          | 973.27             | 249.67             |
| A_68_P31924553 | chr19:4712434-4712478                             | NM_021287:1234          | Spnb3         | INSIDE                 | 0.450                                                        | 0.671                          | 1349.97            | 905.28             | 0.302                          | 1028.50            | 310.31             |
| A_68_P30512951 | chr16:4964673-4964717                             | NM_028301:-364          | Anks3         | PROMOTER               | 0.449                                                        | 0.465                          | 1447.41            | 672.81             | 0.209                          | 1062.93            | 221.98             |
| A_68_P20350882 | chr1:74902485-74902529                            | NM_009872:904           | Cdk5r2        | INSIDE                 | 0.449                                                        | 0.526                          | 1585.72            | 834.75             | 0.236                          | 1345.40            | 317.89             |
| A_68_P25501141 | chr7:133709739-133709783                          | NM_146200:120           | Ei3e          | INSIDE                 | 0.449                                                        | 0.584                          | 3014.82            | 1759.84            | 0.262                          | 2498.26            | 654.79             |
| A_68_P23363149 | chr4:140847557-140847601                          | NM_010139:-9576         | Epha2         | PROMOTER               | 0.449                                                        | 0.512                          | 2369.62            | 1212.75            | 0.230                          | 2188.99            | 503.54             |
| A_68_P21717106 | chr2:146048812-146048856                          | NM_016889:1102          | Insm1         | INSIDE                 | 0.449                                                        | 0.614                          | 980.36             | 601.66             | 0.275                          | 894.71             | 246.48             |
| A_68_P29240038 | chr13:96095444-96095488                           | NR_035461:-5068         | Mir1940       | PROMOTER               | 0.449                                                        | 0.288                          | 2883.13            | 830.94             | 0.129                          | 1613.99            | 208.88             |

| ProbeName      | Target position of probe on CpG island microarray | TargetID                 | GeneSymbol    | CpG island Description | Ratio of relative methylation (TiO <sub>2</sub> -NP/Vehicle) | Sham group                     |                    |                    | TiO <sub>2</sub> -H group      |                    |                    |
|----------------|---------------------------------------------------|--------------------------|---------------|------------------------|--------------------------------------------------------------|--------------------------------|--------------------|--------------------|--------------------------------|--------------------|--------------------|
|                |                                                   |                          |               |                        |                                                              | Relative methylation (Cy5/Cy3) | Cy3 signal (Input) | Cy5 signal (MeDIP) | Relative methylation (Cy5/Cy3) | Cy3 signal (Input) | Cy5 signal (MeDIP) |
| A_68_P28071861 | chr11:100948728-100948772                         | NM_001159384:147         | Mlx           | INSIDE                 | 0.449                                                        | 0.677                          | 2486.91            | 1683.29            | 0.304                          | 1903.81            | 578.81             |
| A_68_P32143069 | chr19:46379412-46379456                           | NM_019408:-750           | Nfkb2         | PROMOTER               | 0.449                                                        | 0.447                          | 2686.41            | 1201.59            | 0.201                          | 2112.99            | 424.67             |
| A_68_P27940753 | chr11:77797545-77797589                           | NM_174852:1249           | Phf12         | INSIDE                 | 0.449                                                        | 0.475                          | 1363.64            | 647.40             | 0.213                          | 995.82             | 212.38             |
| A_68_P26011763 | chr8:85387565-85387609                            | NM_177378:332            | Rnf150        | INSIDE                 | 0.449                                                        | 0.656                          | 2195.76            | 1439.35            | 0.294                          | 1638.72            | 482.49             |
| A_68_P27924778 | chr11:75008653-75008697                           | NM_177708:1180           | Rtn4r1        | INSIDE                 | 0.449                                                        | 0.669                          | 1853.26            | 1239.36            | 0.300                          | 1264.66            | 379.64             |
| A_68_P25957549 | chr8:74094641-74094686                            | NM_011977:1838           | Slc27a1       | INSIDE                 | 0.449                                                        | 0.487                          | 1901.62            | 925.32             | 0.218                          | 1411.90            | 308.25             |
| A_68_P28189252 | chr11:121066090-121066134                         | NM_025402:-150           | 1110031102Rik | DIVERGENT_PROMOTER     | 0.448                                                        | 0.729                          | 3435.64            | 2503.65            | 0.326                          | 2421.51            | 789.79             |
| A_68_P25376021 | chr7:109054423-109054467                          | NM_025605:94             | 2400001E08Rik | INSIDE                 | 0.448                                                        | 0.552                          | 1499.79            | 827.77             | 0.247                          | 1242.59            | 307.04             |
| A_68_P31624569 | chr18:36720617-36720661                           | NM_175375:382            | Ankhd1        | INSIDE                 | 0.448                                                        | 0.678                          | 2049.77            | 1388.83            | 0.303                          | 1603.52            | 486.33             |
| A_68_P22291860 | chr3:84387008-84387052                            | NM_001081093:-483        | Arfp1         | PROMOTER               | 0.448                                                        | 0.631                          | 1815.87            | 1146.56            | 0.283                          | 1516.57            | 428.80             |
| A_68_P21904962 | chr2:180333066-180333110                          | NM_009936:162            | Col9a3        | INSIDE                 | 0.448                                                        | 0.686                          | 2689.73            | 1844.72            | 0.307                          | 2069.64            | 636.14             |
| A_68_P30677440 | chr16:36828175-36828219                           | NM_001113401:149         | Eaf2          | INSIDE                 | 0.448                                                        | 0.380                          | 1847.89            | 702.56             | 0.170                          | 1422.12            | 242.02             |
| A_68_P24674231 | chr6:97567120-97567164                            | NM_145148:509            | Frmd4b        | INSIDE                 | 0.448                                                        | 0.560                          | 5348.50            | 2992.85            | 0.251                          | 3784.83            | 949.10             |
| A_68_P20432928 | chr1:91819533-91819577                            | NM_010262:8197           | Gbx2          | DOWNSTREAM             | 0.448                                                        | 0.565                          | 3982.53            | 2251.11            | 0.253                          | 3110.31            | 787.09             |
| A_68_P28067614 | chr11:100217488-100217532                         | NM_010404:-55            | Hap1          | PROMOTER               | 0.448                                                        | 0.575                          | 1133.08            | 651.98             | 0.258                          | 869.63             | 224.19             |
| A_68_P28831963 | chr13:12488087-12488132                           | NM_144835:468            | Heatr1        | INSIDE                 | 0.448                                                        | 0.645                          | 1517.25            | 978.13             | 0.289                          | 1224.65            | 353.51             |
| A_68_P28107584 | chr11:107408339-107408383                         | NM_198298:-913           | Helz          | PROMOTER               | 0.448                                                        | 0.609                          | 1674.35            | 1019.42            | 0.273                          | 1294.31            | 353.21             |
| A_68_P27924565 | chr11:74979765-74979809                           | NM_001098203:1868        | Hic1          | INSIDE                 | 0.448                                                        | 0.469                          | 1230.09            | 577.15             | 0.210                          | 904.45             | 189.90             |
| A_68_P21902326 | chr2:179960119-179960164                          | NM_001081171:423         | Lama5         | INSIDE                 | 0.448                                                        | 0.542                          | 1267.02            | 686.26             | 0.243                          | 999.45             | 242.55             |
| A_68_P27281304 | chr10:79613780-79613824                           | NM_021565:2768           | Midn          | INSIDE                 | 0.448                                                        | 0.690                          | 3230.35            | 2229.42            | 0.309                          | 2156.27            | 667.21             |
| A_68_P30559115 | chr16:13819208-13819252                           | NM_010946:-139           | Ntan1         | PROMOTER               | 0.448                                                        | 0.613                          | 2042.89            | 1252.94            | 0.275                          | 1488.62            | 409.32             |
| A_68_P30402716 | chr15:85566360-85566404                           | NM_011144:177            | Ppara         | INSIDE                 | 0.448                                                        | 0.641                          | 1474.90            | 945.52             | 0.287                          | 1247.55            | 358.42             |
| A_68_P30576622 | chr16:17927537-17927581                           | NM_153150:754            | Slc25a1       | INSIDE                 | 0.448                                                        | 0.688                          | 2021.54            | 1390.20            | 0.308                          | 1549.55            | 477.85             |
| A_68_P24034078 | chr5:120130938-120130982                          | NM_011535:10283          | Tbx3          | INSIDE                 | 0.448                                                        | 0.550                          | 1811.26            | 996.52             | 0.247                          | 1513.80            | 373.50             |
| A_68_P22749335 | chr4:15193708-15193752                            | NM_181401:764            | Tmem64        | INSIDE                 | 0.448                                                        | 0.676                          | 1452.89            | 982.25             | 0.303                          | 1103.47            | 334.06             |
| A_68_P20405966 | chr1:84835679-84835723                            | NM_133975:179            | Trip12        | INSIDE                 | 0.448                                                        | 0.673                          | 1931.43            | 1299.19            | 0.301                          | 1759.24            | 530.16             |
| A_68_P31102173 | chr17:25325952-25325996                           | NM_001197024:630         | Unkl          | INSIDE                 | 0.448                                                        | 1.411                          | 4361.39            | 6154.12            | 0.632                          | 2988.51            | 1887.80            |
| A_68_P30245925 | chr15:57908333-57908377                           | NM_001042438:-310        | Zhx1          | PROMOTER               | 0.448                                                        | 0.556                          | 4504.29            | 2502.28            | 0.249                          | 3468.84            | 863.28             |
| A_68_P31075497 | chr17:18047147-18047191                           | ENSMUST00000054871:22353 |               | INSIDE                 | 0.448                                                        | 0.614                          | 1242.77            | 763.11             | 0.275                          | 1007.40            | 277.12             |
| A_68_P32206524 | chr19:57388995-57389039                           | ENSMUST0000011524:385    |               | INSIDE                 | 0.448                                                        | 0.509                          | 1524.90            | 775.46             | 0.228                          | 1236.17            | 281.55             |
| A_68_P25286562 | chr7:91234889-91234933                            | NM_030728:105            | 9930013L23Rik | INSIDE                 | 0.447                                                        | 0.527                          | 1669.55            | 879.18             | 0.235                          | 1386.10            | 326.40             |
| A_68_P24248435 | chr6:13627675-13627719                            | NM_175312:270            | B630005N14Rik | INSIDE                 | 0.447                                                        | 0.495                          | 3160.95            | 1563.50            | 0.221                          | 2444.29            | 540.72             |
| A_68_P21428540 | chr2:92274280-92274324                            | NM_009963:-76            | Cry2          | PROMOTER               | 0.447                                                        | 0.485                          | 2280.66            | 1106.33            | 0.217                          | 1641.36            | 355.74             |
| A_68_P29287622 | chr13:104710157-104710201                         | NM_001005868:416         | Erbp2ip       | INSIDE                 | 0.447                                                        | 0.588                          | 906.33             | 532.94             | 0.263                          | 751.27             | 197.52             |
| A_68_P22149452 | chr3:54538552-54538602                            | NM_001163570:710         | Exose8        | INSIDE                 | 0.447                                                        | 0.611                          | 1174.63            | 717.56             | 0.273                          | 917.47             | 250.67             |
| A_68_P25273836 | chr7:88907300-88907346                            | NM_025997:-516           | Fam103a1      | PROMOTER               | 0.447                                                        | 0.581                          | 1321.11            | 767.84             | 0.260                          | 919.68             | 239.14             |
| A_68_P25960243 | chr8:74743668-74743712                            | NM_026455:62             | Fam32a        | INSIDE                 | 0.447                                                        | 0.668                          | 1673.26            | 1117.32            | 0.299                          | 1291.04            | 385.48             |
| A_68_P25151575 | chr7:64847050-64847094                            | NM_008071:530            | Gabrb3        | INSIDE                 | 0.447                                                        | 0.689                          | 3099.78            | 2136.00            | 0.308                          | 2431.03            | 748.86             |
| A_68_P21766452 | chr2:155418422-155418466                          | NM_008180:-2             | Gss           | PROMOTER               | 0.447                                                        | 0.552                          | 1662.28            | 917.93             | 0.247                          | 1326.07            | 327.25             |
| A_68_P27788210 | chr11:50191797-50191841                           | NM_021510:598            | Hnrnp1        | INSIDE                 | 0.447                                                        | 0.742                          | 2420.16            | 1794.73            | 0.332                          | 1721.94            | 571.11             |
| A_68_P29187684 | chr13:83884882-83884926                           | NR_029545:6486           | Mir9-2        | DOWNSTREAM             | 0.447                                                        | 0.594                          | 1137.36            | 675.25             | 0.265                          | 980.16             | 260.10             |
| A_68_P21038062 | chr2:17979342-17979387                            | NM_010804:2467           | Mllt10        | INSIDE                 | 0.447                                                        | 0.488                          | 2359.60            | 1151.21            | 0.218                          | 1771.60            | 386.70             |
| A_68_P30961643 | chr16:91220441-91220485                           | NM_016967:-5332          | Olig2         | PROMOTER               | 0.447                                                        | 0.632                          | 1232.36            | 778.97             | 0.283                          | 856.94             | 242.19             |
| A_68_P28107295 | chr11:107340618-107340662                         | NM_025894:-201           | Psm12         | DIVERGENT_PROMOTER     | 0.447                                                        | 0.554                          | 2323.51            | 1288.02            | 0.248                          | 1839.94            | 456.38             |
| A_68_P28164253 | chr11:117151685-117151737                         | NM_001113487:24151       | Septin9       | INSIDE                 | 0.447                                                        | 4.153                          | 316.04             | 1312.54            | 1.858                          | 334.15             | 620.91             |
| A_68_P28585118 | chr12:83270099-83270143                           | NM_001167983:-882        | Sipa11        | PROMOTER               | 0.447                                                        | 0.569                          | 2305.16            | 1312.09            | 0.255                          | 1793.11            | 456.73             |
| A_68_P28549762 | chr12:76770236-76770280                           | NM_028203:266            | Wdr89         | INSIDE                 | 0.447                                                        | 0.735                          | 2446.61            | 1797.08            | 0.328                          | 1847.07            | 606.24             |
| A_68_P31879113 | chr18:83078968-83079012                           | NM_183033:-1280          | Zfp516        | PROMOTER               | 0.447                                                        | 1.389                          | 7263.72            | 10088.54           | 0.621                          | 4919.39            | 3053.47            |
| A_68_P31159054 | chr17:35496374-35496419                           | M19687:92581             |               | INSIDE                 | 0.447                                                        | 0.631                          | 1620.29            | 1021.71            | 0.282                          | 1269.53            | 357.71             |
| A_68_P24973681 | chr7:13513425-13513470                            | NM_029809:683            | 2310014L17Rik | INSIDE                 | 0.446                                                        | 0.693                          | 1574.98            | 1091.79            | 0.309                          | 1150.74            | 355.56             |
| A_68_P30378498 | chr15:81415923-81415967                           | NM_177821:-699           | Ep300         | PROMOTER               | 0.446                                                        | 0.582                          | 2195.96            | 1278.50            | 0.260                          | 1852.88            | 481.32             |



| ProbeName      | Target position of probe on CpG island microarray | TargetID           | GeneSymbol    | CpG island Description | Ratio of relative methylation (TiO <sub>2</sub> -NP/Vehicle) | Sham group                     |                    |                    | TiO <sub>2</sub> -H group      |                    |                    |
|----------------|---------------------------------------------------|--------------------|---------------|------------------------|--------------------------------------------------------------|--------------------------------|--------------------|--------------------|--------------------------------|--------------------|--------------------|
|                |                                                   |                    |               |                        |                                                              | Relative methylation (Cy5/Cy3) | Cy3 signal (Input) | Cy5 signal (MeDIP) | Relative methylation (Cy5/Cy3) | Cy3 signal (Input) | Cy5 signal (MeDIP) |
| A_68_P23416730 | chr4:151506015-151506059                          | NM_019585:-3002    | Espn          | PROMOTER               | 0.446                                                        | 0.720                          | 3184.73            | 2291.50            | 0.321                          | 2404.06            | 771.46             |
| A_68_P28043444 | chr11:96145749-96145793                           | NM_010461:2552     | Hoxb8         | INSIDE                 | 0.446                                                        | 0.539                          | 3451.12            | 1861.77            | 0.241                          | 2677.95            | 644.60             |
| A_68_P28041910 | chr11:95866408-95866452                           | NM_009951:828      | Igf2bp1       | INSIDE                 | 0.446                                                        | 0.728                          | 1676.59            | 1220.03            | 0.325                          | 1247.96            | 405.26             |
| A_68_P28033523 | chr11:94382882-94382926                           | NM_170671:-88      | Mycbpap       | PROMOTER               | 0.446                                                        | 0.536                          | 1774.96            | 951.92             | 0.239                          | 1290.63            | 308.88             |
| A_68_P22063505 | chr3:37318090-37318134                            | NM_153561:400      | Nudt6         | INSIDE                 | 0.446                                                        | 0.595                          | 1766.22            | 1050.41            | 0.265                          | 1459.60            | 387.04             |
| A_68_P31985663 | chr19:17468572-17468616                           | NM_019437:62       | Rfk           | INSIDE                 | 0.446                                                        | 0.493                          | 2174.07            | 1070.79            | 0.219                          | 1675.67            | 367.73             |
| A_68_P31024851 | chr17:7374165-7374209                             | NM_011299:-277     | Rps6ka2       | PROMOTER               | 0.446                                                        | 0.713                          | 3137.62            | 2236.78            | 0.318                          | 2286.50            | 726.99             |
| A_68_P30370943 | chr15:80064789-80064834                           | NM_178719:302      | Smcr7l        | INSIDE                 | 0.446                                                        | 0.655                          | 1700.27            | 1113.63            | 0.292                          | 1248.21            | 364.91             |
| A_68_P24114432 | chr5:135517814-135517858                          | NM_016801:18395    | Stx1a         | INSIDE                 | 0.446                                                        | 1.396                          | 2378.55            | 3320.29            | 0.623                          | 1640.68            | 1022.52            |
| A_68_P22552061 | chr3:135101698-135101742                          | NM_025356:-2       | Ube2d3        | DIVERGENT_PROMOTER     | 0.446                                                        | 0.590                          | 1701.83            | 1003.69            | 0.263                          | 1466.57            | 385.37             |
| A_68_P28078911 | chr11:102180801-102180845                         | NM_011551:-412     | Ubf1          | PROMOTER               | 0.446                                                        | 0.652                          | 1379.17            | 898.69             | 0.291                          | 1087.62            | 316.34             |
| A_68_P28034315 | chr11:94538289-94538333                           | NM_145828:497      | Xylt2         | INSIDE                 | 0.446                                                        | 0.588                          | 3266.40            | 1920.22            | 0.262                          | 2479.69            | 650.03             |
| A_68_P23562834 | chr5:28785352-28785396                            | NR_015562:-8149    | 953003601Rik  | PROMOTER               | 0.445                                                        | 0.664                          | 5162.24            | 3429.44            | 0.296                          | 3919.25            | 1159.80            |
| A_68_P24792873 | chr6:119339010-119339056                          | NM_197985:28469    | Adipor2       | INSIDE                 | 0.445                                                        | 0.561                          | 2349.05            | 1317.51            | 0.249                          | 1921.58            | 479.31             |
| A_68_P28185536 | chr11:120459969-120460013                         | NM_001038230:145   | Anapc11       | INSIDE                 | 0.445                                                        | 0.675                          | 1691.06            | 1141.57            | 0.300                          | 1408.93            | 423.21             |
| A_68_P23332634 | chr4:135762412-135762456                          | NM_001008232:155   | Asap3         | INSIDE                 | 0.445                                                        | 1.456                          | 5422.86            | 7897.83            | 0.649                          | 3741.92            | 2426.99            |
| A_68_P23513995 | chr5:18733341-18733385                            | NM_001170746:499   | Magi2         | INSIDE                 | 0.445                                                        | 0.584                          | 1843.20            | 1076.15            | 0.260                          | 1232.77            | 320.52             |
| A_68_P23006649 | chr4:70195250-70195294                            | NM_172694:690      | Megf9         | INSIDE                 | 0.445                                                        | 0.493                          | 1476.67            | 728.09             | 0.220                          | 1292.16            | 283.64             |
| A_68_P32016082 | chr19:23215759-23215803                           | NR_035423:-8140    | Mir1192       | PROMOTER               | 0.445                                                        | 0.468                          | 2544.85            | 1192.17            | 0.209                          | 2104.26            | 438.85             |
| A_68_P21820019 | chr2:164658808-164658852                          | NM_001082974:266   | Neur12        | INSIDE                 | 0.445                                                        | 0.576                          | 2329.81            | 1342.62            | 0.256                          | 1695.38            | 434.57             |
| A_68_P24052509 | chr5:123299880-123299924                          | NM_030564:-294     | Rnf34         | PROMOTER               | 0.445                                                        | 0.663                          | 969.86             | 643.23             | 0.295                          | 778.82             | 230.07             |
| A_68_P27936387 | chr11:77029678-77029722                           | NM_177710:-226     | Ssh2          | PROMOTER               | 0.445                                                        | 0.529                          | 1386.73            | 733.42             | 0.235                          | 1221.69            | 287.33             |
| A_68_P20346773 | chr1:74144944-74144988                            | NM_027884:26055    | Tns1          | INSIDE                 | 0.445                                                        | 0.456                          | 1362.03            | 621.17             | 0.203                          | 1054.48            | 213.78             |
| A_68_P29672993 | chr14:65977836-65977880                           | NM_199029:346      | Zfp395        | INSIDE                 | 0.445                                                        | 0.659                          | 1259.26            | 829.55             | 0.293                          | 1109.18            | 325.14             |
| A_68_P25504739 | chr7:134387875-134387919                          | NM_177362:-143     | Zfp771        | PROMOTER               | 0.445                                                        | 0.593                          | 1789.04            | 1060.87            | 0.264                          | 1419.08            | 374.74             |
| A_68_P27081279 | chr10:39618779-39618823                           | NR_033628:244      | AA474331      | INSIDE                 | 0.444                                                        | 0.601                          | 1486.98            | 893.63             | 0.267                          | 1342.12            | 357.96             |
| A_68_P25354923 | chr7:105457417-105457461                          | NM_025408:599      | Acer3         | INSIDE                 | 0.444                                                        | 0.693                          | 1705.31            | 1181.82            | 0.308                          | 1299.88            | 399.96             |
| A_68_P21907441 | chr2:180701664-180701708                          | NM_001177707:-243  | Arfgap1       | PROMOTER               | 0.444                                                        | 0.549                          | 1007.37            | 552.64             | 0.244                          | 750.71             | 182.98             |
| A_68_P29856056 | chr14:102039512-102039556                         | NM_001033132:154   | Commd6        | INSIDE                 | 0.444                                                        | 0.524                          | 2094.58            | 1098.22            | 0.233                          | 1458.91            | 339.78             |
| A_68_P22609959 | chr3:145313007-145313051                          | NM_010516:-81      | Cyr61         | PROMOTER               | 0.444                                                        | 0.515                          | 1021.54            | 525.69             | 0.229                          | 776.44             | 177.50             |
| A_68_P29747596 | chr14:79132794-79132838                           | NM_001081336:-7920 | Dgkh          | PROMOTER               | 0.444                                                        | 0.562                          | 3136.63            | 1762.77            | 0.250                          | 2305.16            | 575.59             |
| A_68_P31286837 | chr17:63229431-63229475                           | NM_010109:1214     | Efnas5        | INSIDE                 | 0.444                                                        | 0.545                          | 1056.23            | 575.46             | 0.242                          | 786.12             | 190.15             |
| A_68_P20825994 | chr1:172994223-172994267                          | NM_010188:-4710    | Fcgr3         | PROMOTER               | 0.444                                                        | 3.466                          | 22821.82           | 79103.15           | 1.540                          | 15614.41           | 24042.33           |
| A_68_P31985484 | chr19:17430865-17430909                           | NM_173442:271      | Gent1         | INSIDE                 | 0.444                                                        | 0.580                          | 1236.59            | 717.45             | 0.258                          | 1024.58            | 263.86             |
| A_68_P21331222 | chr2:73224458-73224502                            | NM_001190297:-25   | Gpr155        | PROMOTER               | 0.444                                                        | 0.566                          | 4010.01            | 2269.44            | 0.251                          | 3134.06            | 787.82             |
| A_68_P28882355 | chr13:23673495-23673539                           | NM_175654:46       | Hist1h4d      | INSIDE                 | 0.444                                                        | 0.577                          | 1228.26            | 708.59             | 0.256                          | 898.56             | 230.00             |
| A_68_P27862273 | chr11:63732747-63732791                           | NM_018805:3018     | Hs3st3b1      | INSIDE                 | 0.444                                                        | 0.489                          | 1102.67            | 539.65             | 0.217                          | 913.95             | 198.59             |
| A_68_P31516121 | chr18:15309314-15309358                           | NM_134112:619      | Ketd1         | INSIDE                 | 0.444                                                        | 0.498                          | 1951.11            | 971.09             | 0.221                          | 1433.41            | 316.92             |
| A_68_P21339749 | chr2:74664060-74664104                            | NM_016804:214      | Mtx2          | INSIDE                 | 0.444                                                        | 0.467                          | 1450.60            | 677.58             | 0.208                          | 1291.15            | 268.03             |
| A_68_P27536453 | chr10:126971246-126971290                         | NM_183297:347      | Nxph4         | INSIDE                 | 0.444                                                        | 0.595                          | 1610.34            | 957.72             | 0.264                          | 1084.93            | 286.51             |
| A_68_P22778520 | chr4:22416842-22416887                            | NM_008899:-1586    | Pou3f2        | PROMOTER               | 0.444                                                        | 0.539                          | 1130.02            | 609.17             | 0.240                          | 929.50             | 222.69             |
| A_68_P23317226 | chr4:132925776-132925820                          | NM_016981:112      | Sle9a1        | INSIDE                 | 0.444                                                        | 0.553                          | 2591.34            | 1434.14            | 0.246                          | 2238.00            | 549.81             |
| A_68_P31118766 | chr17:27976996-27977040                           | NM_011432:-13      | Snrpc         | PROMOTER               | 0.444                                                        | 0.525                          | 2298.67            | 1206.29            | 0.233                          | 1889.17            | 439.82             |
| A_68_P27044450 | chr10:31165279-31165323                           | NM_009413:427      | Tpd52l1       | INSIDE                 | 0.444                                                        | 1.523                          | 2312.79            | 3521.38            | 0.675                          | 1632.74            | 1102.72            |
| A_68_P30255505 | chr15:59479171-59479215                           | NM_144549:-1016    | Trib1         | PROMOTER               | 0.444                                                        | 0.602                          | 942.82             | 567.58             | 0.267                          | 726.19             | 193.97             |
| A_68_P31722243 | chr18:55147517-55147561                           | NM_175751:2296     | Zfp608        | INSIDE                 | 0.444                                                        | 0.413                          | 1266.85            | 523.68             | 0.184                          | 982.38             | 180.48             |
| A_68_P32259782 | chrX:11583929-11583973                            |                    |               | Unknown                | 0.444                                                        | 0.697                          | 2404.83            | 1676.41            | 0.309                          | 963.03             | 297.75             |
| A_68_P21747319 | chr2:151874059-151874103                          |                    |               | Unknown                | 0.444                                                        | 0.608                          | 1098.52            | 668.35             | 0.270                          | 908.39             | 245.48             |
| A_68_P25671550 | chr8:13975017-13975061                            | NM_173744:-261     | 2610019F03Rik | PROMOTER               | 0.443                                                        | 0.550                          | 1658.24            | 911.69             | 0.244                          | 1268.81            | 309.06             |
| A_68_P30958537 | chr16:90727677-90727721                           | NM_025642:-82      | 2610039C10Rik | PROMOTER               | 0.443                                                        | 0.419                          | 2239.70            | 938.37             | 0.186                          | 1728.55            | 320.74             |
| A_68_P25267240 | chr7:87679859-87679903                            | NM_007550:4        | Blm           | INSIDE                 | 0.443                                                        | 0.388                          | 2732.14            | 1061.30            | 0.172                          | 2245.55            | 386.81             |

| ProbeName      | Target position of probe on CpG island microarray | TargetID                  | GeneSymbol  | CpG island Description | Ratio of relative methylation (TiO <sub>2</sub> -NP/Vehicle) | Sham group                     |                    |                    | TiO <sub>2</sub> -H group      |                    |                    |
|----------------|---------------------------------------------------|---------------------------|-------------|------------------------|--------------------------------------------------------------|--------------------------------|--------------------|--------------------|--------------------------------|--------------------|--------------------|
|                |                                                   |                           |             |                        |                                                              | Relative methylation (Cy5/Cy3) | Cy3 signal (Input) | Cy5 signal (MeDIP) | Relative methylation (Cy5/Cy3) | Cy3 signal (Input) | Cy5 signal (MeDIP) |
| A_68_P23202006 | chr4:109338923-109338967                          | NM_007671:-967            | Cdkn2c      | PROMOTER               | 0.443                                                        | 0.593                          | 1474.25            | 874.55             | 0.263                          | 1226.01            | 322.23             |
| A_68_P21566329 | chr2:118640037-118640081                          | NM_026412:320             | D2Ertcd750c | INSIDE                 | 0.443                                                        | 1.588                          | 15642.42           | 24845.41           | 0.703                          | 10913.54           | 7672.78            |
| A_68_P23363150 | chr4:140847720-140847764                          | NM_010139:-9412           | Epha2       | PROMOTER               | 0.443                                                        | 0.548                          | 1558.73            | 853.96             | 0.243                          | 1193.32            | 289.60             |
| A_68_P25371474 | chr7:108256833-108256877                          | NM_001146010:-434         | Fchs2       | PROMOTER               | 0.443                                                        | 0.409                          | 1624.10            | 664.34             | 0.181                          | 1226.50            | 222.45             |
| A_68_P22030513 | chr3:30755322-30755366                            | NM_001134385:473          | Gpr160      | INSIDE                 | 0.443                                                        | 0.555                          | 2154.68            | 1195.23            | 0.246                          | 1568.11            | 385.21             |
| A_68_P20193921 | chr1:44608865-44608909                            | NM_028450:371             | Gulp1       | INSIDE                 | 0.443                                                        | 0.456                          | 2276.31            | 1037.24            | 0.202                          | 1793.04            | 362.10             |
| A_68_P27452133 | chr10:111409980-111410024                         | NM_178610:252             | Krr1        | INSIDE                 | 0.443                                                        | 0.542                          | 1265.23            | 685.94             | 0.240                          | 884.31             | 212.47             |
| A_68_P27154483 | chr10:55835222-55835266                           | NM_001163833:8522         | Msl3l2      | INSIDE                 | 0.443                                                        | 0.444                          | 1207.43            | 535.66             | 0.197                          | 935.63             | 184.04             |
| A_68_P22220270 | chr3:69121308-69121352                            | NM_178726:491             | Ppm1l       | INSIDE                 | 0.443                                                        | 0.526                          | 1482.27            | 779.49             | 0.233                          | 1208.68            | 281.64             |
| A_68_P27080344 | chr10:39452278-39452323                           | NM_011264:335             | Rev3l       | INSIDE                 | 0.443                                                        | 0.567                          | 1488.42            | 844.16             | 0.251                          | 1117.16            | 280.88             |
| A_68_P28974163 | chr13:40823956-40824000                           | NM_001122948:1834         | Tcfap2a     | INSIDE                 | 0.443                                                        | 1.386                          | 4339.19            | 6013.21            | 0.614                          | 3160.68            | 1941.24            |
| A_68_P31092956 | chr17:23810793-23810838                           | NM_001008425:-78          | Thoc6       | PROMOTER               | 0.443                                                        | 0.613                          | 2258.70            | 1383.83            | 0.271                          | 1685.84            | 457.61             |
| A_68_P24164945 | chr5:145992341-145992385                          | NM_001083958:-221         | Zfp655      | PROMOTER               | 0.443                                                        | 0.599                          | 1108.91            | 664.54             | 0.265                          | 960.77             | 255.03             |
| A_68_P30496553 | chr15:102034646-102034690                         | NM_153194:-4029           | Zfp740      | PROMOTER               | 0.443                                                        | 0.497                          | 1135.27            | 564.41             | 0.220                          | 894.13             | 196.99             |
| A_68_P31215566 | chr17:48168538-48168582                           | AK007241:6683             |             | DOWNSTREAM             | 0.443                                                        | 0.665                          | 2308.10            | 1533.89            | 0.294                          | 1577.82            | 464.11             |
| A_68_P24686656 | chr6:99472683-99472732                            | ENSMUST00000155466:144083 |             |                        | 0.443                                                        | 0.584                          | 1226.42            | 715.75             | 0.259                          | 909.21             | 235.18             |
| A_68_P26135030 | chr8:108160451-108160495                          | NM_181322:35              | Ctcf        | INSIDE                 | 0.442                                                        | 0.615                          | 1113.39            | 684.51             | 0.271                          | 911.29             | 247.39             |
| A_68_P22305771 | chr3:86723508-86723553                            | NM_001195496:1276         | Delc2       | INSIDE                 | 0.442                                                        | 0.524                          | 1049.98            | 550.62             | 0.232                          | 924.09             | 214.13             |
| A_68_P30600196 | chr16:22858132-22858176                           | NM_001190804:237          | Dnajb11     | INSIDE                 | 0.442                                                        | 0.462                          | 1650.30            | 763.25             | 0.204                          | 1246.41            | 254.85             |
| A_68_P26761641 | chr9:98887034-98887078                            | NM_001122851:265          | Faim        | INSIDE                 | 0.442                                                        | 0.599                          | 2072.05            | 1241.28            | 0.265                          | 1683.64            | 493.75             |
| A_68_P30589002 | chr16:20693547-20693591                           | NM_133778:-1561           | Fam131a     | PROMOTER               | 0.442                                                        | 1.654                          | 4680.12            | 7740.39            | 0.730                          | 3109.04            | 2270.27            |
| A_68_P25609911 | chr7:152081721-152081765                          | NM_008003:-694            | Fgf15       | PROMOTER               | 0.442                                                        | 0.444                          | 1253.54            | 556.52             | 0.196                          | 989.14             | 193.93             |
| A_68_P21116904 | chr2:32549583-32549627                            | NM_010236:91              | Fpgs        | INSIDE                 | 0.442                                                        | 0.533                          | 2061.20            | 1098.37            | 0.236                          | 1755.02            | 413.65             |
| A_68_P21565618 | chr2:118529436-118529480                          | NM_001081971:241          | Gm1337      | INSIDE                 | 0.442                                                        | 0.518                          | 1582.95            | 819.92             | 0.229                          | 1202.22            | 275.24             |
| A_68_P26847148 | chr9:114842896-114842940                          | NM_175380:187             | Gpd1l       | INSIDE                 | 0.442                                                        | 0.646                          | 1884.94            | 1217.44            | 0.285                          | 1483.66            | 423.46             |
| A_68_P28679268 | chr12:101203451-101203495                         | NM_001164426:764          | Kenk13      | INSIDE                 | 0.442                                                        | 0.736                          | 2083.21            | 1532.32            | 0.325                          | 1587.95            | 516.39             |
| A_68_P26075899 | chr8:96703109-96703153                            | NM_013602:142             | Mt1         | INSIDE                 | 0.442                                                        | 0.498                          | 1026.81            | 511.41             | 0.220                          | 911.68             | 200.51             |
| A_68_P27282471 | chr10:79786234-79786278                           | NM_008793:5962            | Pesk4       | INSIDE                 | 0.442                                                        | 0.580                          | 1614.05            | 936.13             | 0.257                          | 1117.69            | 286.72             |
| A_68_P21432195 | chr2:92885557-92885608                            | NM_001177536:719          | Prdm11      | INSIDE                 | 0.442                                                        | 0.339                          | 1532.01            | 519.27             | 0.150                          | 1208.33            | 180.83             |
| A_68_P26522114 | chr9:53513817-53513861                            | NM_175562:499             | Rab39       | INSIDE                 | 0.442                                                        | 0.703                          | 1514.20            | 1064.49            | 0.311                          | 1219.90            | 379.01             |
| A_68_P26948618 | chr10:12728670-12728714                           | NM_175102:437             | SG3b5       | INSIDE                 | 0.442                                                        | 0.533                          | 2051.96            | 1092.68            | 0.235                          | 1666.12            | 391.82             |
| A_68_P28578875 | chr12:82127694-82127738                           | NM_001146217:-78          | Smoc1       | PROMOTER               | 0.442                                                        | 0.664                          | 1497.68            | 994.72             | 0.294                          | 1107.58            | 325.50             |
| A_68_P26157753 | chr8:112089724-112089768                          | NM_175646:-139            | Txn14b      | DIVERGENT_PROMOTER     | 0.442                                                        | 0.496                          | 1241.52            | 615.33             | 0.219                          | 986.23             | 215.99             |
| A_68_P26232972 | chr8:124900602-124900646                          | NM_001029993:109          | Zc3h18      | INSIDE                 | 0.442                                                        | 0.388                          | 1718.34            | 666.76             | 0.171                          | 1401.42            | 240.18             |
| A_68_P27892698 | chr11:68853700-68853744                           | NM_011496:-5422           | Aurkb       | PROMOTER               | 0.441                                                        | 0.655                          | 3670.83            | 2403.87            | 0.289                          | 2532.99            | 730.83             |
| A_68_P21516613 | chr2:109517788-109517832                          | NM_001048139:1757         | Bdnf        | INSIDE                 | 0.441                                                        | 0.689                          | 1157.11            | 797.50             | 0.304                          | 929.69             | 282.59             |
| A_68_P20600404 | chr1:130313816-130313860                          | NM_177445:155             | Dars        | INSIDE                 | 0.441                                                        | 0.641                          | 3398.23            | 2177.34            | 0.283                          | 2341.08            | 662.18             |
| A_68_P28100238 | chr11:106078606-106078650                         | NM_028074:389             | Ddx42       | INSIDE                 | 0.441                                                        | 0.655                          | 2883.28            | 1887.26            | 0.288                          | 2163.76            | 624.04             |
| A_68_P22318234 | chr3:89070459-89070503                            | NM_026767:7               | Dpm3        | INSIDE                 | 0.441                                                        | 0.535                          | 2096.22            | 1121.85            | 0.236                          | 1553.58            | 366.66             |
| A_68_P29699028 | chr14:70478715-70478759                           | NM_018781:1485            | Egr3        | INSIDE                 | 0.441                                                        | 0.563                          | 1355.65            | 763.34             | 0.248                          | 993.42             | 246.71             |
| A_68_P32227328 | chr19:60887531-60887575                           | NM_001167829:80           | Fam45a      | INSIDE                 | 0.441                                                        | 0.501                          | 1986.74            | 995.16             | 0.221                          | 1578.45            | 348.66             |
| A_68_P28530000 | chr12:73171697-73171741                           | NM_181752:260             | Gpr135      | INSIDE                 | 0.441                                                        | 0.671                          | 2296.17            | 1540.35            | 0.296                          | 1759.27            | 519.91             |
| A_68_P23332336 | chr4:135703661-135703706                          | NM_008321:3947            | Id3         | DOWNSTREAM             | 0.441                                                        | 0.505                          | 1280.31            | 646.71             | 0.223                          | 1010.68            | 225.39             |
| A_68_P29616406 | chr14:55733544-55733588                           | NM_177049:2206            | Jph4        | INSIDE                 | 0.441                                                        | 3.348                          | 6057.86            | 20283.42           | 1.476                          | 3752.85            | 5537.91            |
| A_68_P23252895 | chr4:120403760-120403804                          | NM_001081142:15999        | Kenq4       | INSIDE                 | 0.441                                                        | 0.574                          | 2018.15            | 1158.73            | 0.253                          | 1578.47            | 399.81             |
| A_68_P26343617 | chr9:20530951-20530995                            | NM_173777:1686            | Olfm2       | INSIDE                 | 0.441                                                        | 0.539                          | 1137.97            | 613.48             | 0.238                          | 820.60             | 195.07             |
| A_68_P24995078 | chr7:20334418-20334462                            | NM_008990:482             | Pvrl2       | INSIDE                 | 0.441                                                        | 1.457                          | 4703.29            | 6852.41            | 0.643                          | 2952.10            | 1897.15            |
| A_68_P31753490 | chr18:60934321-60934365                           | NM_020600:93              | Rps14       | INSIDE                 | 0.441                                                        | 0.608                          | 1030.88            | 626.42             | 0.268                          | 766.85             | 205.72             |
| A_68_P22286848 | chr3:83570629-83570673                            | NM_009144:408             | Sfrp2       | INSIDE                 | 0.441                                                        | 0.580                          | 3003.67            | 1742.06            | 0.256                          | 2242.65            | 574.07             |
| A_68_P31844546 | chr18:77098668-77098712                           | NM_001109743:3547         | Skor2       | INSIDE                 | 0.441                                                        | 0.418                          | 1625.46            | 679.48             | 0.185                          | 1476.19            | 272.42             |
| A_68_P27911317 | chr11:72225169-72225213                           | NM_177776:25              | Smtnl2      | INSIDE                 | 0.441                                                        | 0.403                          | 1735.43            | 698.68             | 0.177                          | 1513.33            | 268.61             |

| ProbeName      | Target position of probe on CpG island microarray | TargetID                 | GeneSymbol    | CpG island Description | Ratio of relative methylation (TiO <sub>2</sub> -NP/Vehicle) | Sham group                     |                    |                    | TiO <sub>2</sub> -H group      |                    |                    |
|----------------|---------------------------------------------------|--------------------------|---------------|------------------------|--------------------------------------------------------------|--------------------------------|--------------------|--------------------|--------------------------------|--------------------|--------------------|
|                |                                                   |                          |               |                        |                                                              | Relative methylation (Cy5/Cy3) | Cy3 signal (Input) | Cy5 signal (MeDIP) | Relative methylation (Cy5/Cy3) | Cy3 signal (Input) | Cy5 signal (MeDIP) |
| A_68_P27952008 | chr11:79806189-79806233                           | NM_001163018:-397        | Suz12         | PROMOTER               | 0.441                                                        | 0.572                          | 915.55             | 524.12             | 0.252                          | 779.33             | 196.59             |
| A_68_P24057205 | chr5:124170298-124170343                          | NM_027494:733            | Zecch8        | INSIDE                 | 0.441                                                        | 0.346                          | 2295.83            | 793.54             | 0.153                          | 1866.38            | 284.69             |
| A_68_P27968102 | chr11:82578176-82578220                           | NM_025884:352            | Zfp830        | INSIDE                 | 0.441                                                        | 0.519                          | 2850.36            | 1480.36            | 0.229                          | 2169.05            | 496.36             |
| A_68_P28350341 | chr12:35592101-35592145                           | AK087563:-473            |               | PROMOTER               | 0.441                                                        | 0.654                          | 1190.26            | 778.82             | 0.288                          | 991.15             | 285.89             |
| A_68_P27933172 | chr11:76437300-76437344                           | ENSMUST00000155035:-1506 |               | PROMOTER               | 0.441                                                        | 0.624                          | 2294.18            | 1431.63            | 0.276                          | 1953.66            | 538.24             |
| A_68_P31159056 | chr17:35496669-35496713                           | M19687:92875             |               | INSIDE                 | 0.441                                                        | 0.623                          | 826.04             | 514.46             | 0.274                          | 691.50             | 189.79             |
| A_68_P27942255 | chr11:78075391-78075435                           | NM_001002004:157         | 2610507B11Rik | INSIDE                 | 0.440                                                        | 0.526                          | 2629.67            | 1382.05            | 0.231                          | 1924.66            | 445.41             |
| A_68_P30473516 | chr15:97998981-97999025                           | NM_177716:766            | AI836003      | INSIDE                 | 0.440                                                        | 0.387                          | 1924.31            | 743.77             | 0.170                          | 1490.62            | 253.52             |
| A_68_P27843675 | chr11:60352579-60352623                           | NM_172943:1416           | Alkbh5        | INSIDE                 | 0.440                                                        | 0.495                          | 1031.61            | 510.70             | 0.218                          | 768.43             | 167.25             |
| A_68_P26254625 | chr8:128434525-128434569                          | NM_145608:197            | BC021891      | INSIDE                 | 0.440                                                        | 0.440                          | 1331.18            | 586.11             | 0.194                          | 1002.52            | 194.30             |
| A_68_P27553119 | chr11:3549485-3549529                             | NM_198162:-9196          | Morc2a        | PROMOTER               | 0.440                                                        | 0.401                          | 2147.12            | 860.50             | 0.176                          | 1708.81            | 301.18             |
| A_68_P30550105 | chr16:11984315-11984359                           | NM_001174086:131         | Shisa9        | INSIDE                 | 0.440                                                        | 0.578                          | 2001.15            | 1155.68            | 0.254                          | 1514.02            | 385.06             |
| A_68_P31930503 | chr19:5731362-5731406                             | NM_020491:337            | Sssea1        | INSIDE                 | 0.440                                                        | 0.723                          | 2204.80            | 1595.08            | 0.318                          | 1671.91            | 531.85             |
| A_68_P30476411 | chr15:98608721-98608765                           | NM_011718:-161           | Wnt10b        | PROMOTER               | 0.440                                                        | 0.662                          | 1704.65            | 1127.74            | 0.291                          | 1299.68            | 378.15             |
| A_68_P20960102 | chr11:197067849-197067893                         |                          |               | Unknown                | 0.440                                                        | 0.630                          | 1025.93            | 645.86             | 0.277                          | 798.20             | 221.16             |
| A_68_P27646750 | chr11:23533697-23533742                           | NM_027860:-88            | 0610010F05Rik | PROMOTER               | 0.439                                                        | 0.620                          | 1612.47            | 1000.42            | 0.272                          | 1363.85            | 371.50             |
| A_68_P30481999 | chr15:99556228-99556272                           | NM_183256:202            | 2310016M24Rik | INSIDE                 | 0.439                                                        | 0.660                          | 1722.97            | 1137.77            | 0.290                          | 1309.47            | 379.55             |
| A_68_P30686473 | chr16:38522456-38522500                           | NM_024273:269            | 4930455C21Rik | INSIDE                 | 0.439                                                        | 0.485                          | 1655.14            | 803.08             | 0.213                          | 1287.88            | 274.02             |
| A_68_P23293919 | chr4:128602230-128602274                          | NM_172875:37409          | Ade           | DOWNSTREAM             | 0.439                                                        | 0.704                          | 1371.14            | 965.02             | 0.309                          | 1094.55            | 338.56             |
| A_68_P23230003 | chr4:116269931-116269975                          | NR_029450:283            | C530005A16Rik | INSIDE                 | 0.439                                                        | 0.628                          | 1343.00            | 843.05             | 0.276                          | 1099.52            | 303.25             |
| A_68_P23439688 | chr4:154998849-154998893                          | NM_007661:-107           | Cdk11b        | PROMOTER               | 0.439                                                        | 0.482                          | 1142.17            | 550.31             | 0.212                          | 905.93             | 191.67             |
| A_68_P30589275 | chr16:20733601-20733645                           | NM_009893:423            | Chrd          | INSIDE                 | 0.439                                                        | 0.591                          | 1890.77            | 1118.12            | 0.260                          | 1433.01            | 372.01             |
| A_68_P29047196 | chr13:54150905-54150949                           | NM_010076:101            | Drd1a         | INSIDE                 | 0.439                                                        | 0.594                          | 3805.06            | 2258.45            | 0.261                          | 3019.15            | 786.63             |
| A_68_P28072730 | chr11:101087587-101087631                         | NM_007970:156            | Ezh1          | INSIDE                 | 0.439                                                        | 0.537                          | 2728.69            | 1465.05            | 0.235                          | 2056.54            | 484.28             |
| A_68_P21903068 | chr2:180069255-180069300                          | NM_008093:107            | Gata5         | INSIDE                 | 0.439                                                        | 0.542                          | 1319.22            | 715.58             | 0.238                          | 976.06             | 232.35             |
| A_68_P27043768 | chr10:31033252-31033296                           | NM_027168:64             | Hddec2        | INSIDE                 | 0.439                                                        | 0.610                          | 1176.36            | 717.39             | 0.267                          | 887.91             | 237.48             |
| A_68_P24818962 | chr6:125095826-125095870                          | NM_001039669:580         | Iffo1         | INSIDE                 | 0.439                                                        | 0.591                          | 2255.04            | 1333.38            | 0.260                          | 1958.61            | 508.31             |
| A_68_P25010078 | chr7:26165068-26165112                            | NM_001039507:10035       | Lipe          | INSIDE                 | 0.439                                                        | 0.459                          | 1245.19            | 571.35             | 0.201                          | 898.86             | 181.09             |
| A_68_P22823553 | chr4:32887074-32887124                            | NM_175364:-135           | Lyrm2         | PROMOTER               | 0.439                                                        | 0.454                          | 1133.03            | 514.86             | 0.200                          | 944.85             | 188.67             |
| A_68_P28197875 | chr12:3960097-3960141                             | NM_008895:5168           | Pomc          | INSIDE                 | 0.439                                                        | 0.486                          | 1905.28            | 926.48             | 0.213                          | 1632.12            | 348.09             |
| A_68_P24604720 | chr6:85324839-85324883                            | NM_001003955:232         | Rab11fip5     | PROMOTER               | 0.439                                                        | 0.719                          | 1662.08            | 1194.98            | 0.316                          | 1279.46            | 404.09             |
| A_68_P31412092 | chr17:86084426-86084470                           | NM_011380:3146           | Six2          | INSIDE                 | 0.439                                                        | 0.648                          | 2333.49            | 1511.04            | 0.284                          | 1636.79            | 465.01             |
| A_68_P22339767 | chr3:94386067-94386111                            | NM_029721:536            | Snx27         | INSIDE                 | 0.439                                                        | 0.611                          | 6243.91            | 3812.84            | 0.268                          | 4648.40            | 1244.74            |
| A_68_P31092987 | chr17:23814347-23814391                           | NM_001161746:48          | Tnfrsf12a     | INSIDE                 | 0.439                                                        | 0.568                          | 2157.24            | 1224.67            | 0.249                          | 1778.86            | 443.64             |
| A_68_P20858591 | chr11:179189274-179189318                         | ENSMUST00000111159:-962  |               | PROMOTER               | 0.439                                                        | 0.645                          | 1469.59            | 948.05             | 0.283                          | 1227.30            | 347.22             |
| A_68_P22029171 | chr3:30494182-30494226                            | NM_029690:4588           | Arpm1         | DOWNSTREAM             | 0.438                                                        | 0.628                          | 1590.38            | 999.46             | 0.275                          | 1188.76            | 327.46             |
| A_68_P22822455 | chr4:32702059-32702108                            | NM_001122978:-364        | Casp8ap2      | PROMOTER               | 0.438                                                        | 0.588                          | 1196.61            | 703.15             | 0.257                          | 1015.33            | 261.36             |
| A_68_P27171637 | chr10:59414321-59414365                           | NM_029083:176            | Ddit4         | INSIDE                 | 0.438                                                        | 0.426                          | 1369.55            | 584.01             | 0.187                          | 1046.06            | 195.23             |
| A_68_P28083893 | chr11:103060694-103060738                         | NM_001077698:28265       | Fmnl1         | DOWNSTREAM             | 0.438                                                        | 0.515                          | 2513.03            | 1294.04            | 0.225                          | 1828.85            | 412.35             |
| A_68_P25766299 | chr8:33994276-33994320                            | NM_001177589:66200       | Gm3985        | DOWNSTREAM             | 0.438                                                        | 0.680                          | 2856.05            | 1940.82            | 0.298                          | 2150.00            | 640.63             |
| A_68_P24186280 | chr5:150438607-150438651                          | NM_013559:262            | Hsph1         | INSIDE                 | 0.438                                                        | 0.698                          | 2606.55            | 1819.58            | 0.306                          | 2104.52            | 643.74             |
| A_68_P24326992 | chr6:29457810-29457854                            | NM_001029985:120         | Kcp           | INSIDE                 | 0.438                                                        | 0.734                          | 2819.38            | 2068.58            | 0.321                          | 2183.45            | 700.91             |
| A_68_P25256092 | chr7:85723225-85723269                            | NM_008746:-522           | Ntrk3         | PROMOTER               | 0.438                                                        | 0.647                          | 1011.10            | 654.18             | 0.283                          | 766.67             | 217.27             |
| A_68_P26282995 | chr9:6168715-6168768                              | NM_027924:130            | Pdgfd         | INSIDE                 | 0.438                                                        | 0.570                          | 1318.34            | 751.53             | 0.250                          | 1144.98            | 285.94             |
| A_68_P21322066 | chr2:71711031-71711075                            | NM_172665:-276           | Pdk1          | PROMOTER               | 0.438                                                        | 0.474                          | 2335.40            | 1106.96            | 0.207                          | 1733.94            | 359.64             |
| A_68_P28987052 | chr13:43011760-43011804                           | NM_001005740:206833      | Phactr1       | INSIDE                 | 0.438                                                        | 0.656                          | 2490.44            | 1634.25            | 0.287                          | 2091.09            | 601.14             |
| A_68_P23351037 | chr4:138866350-138866394                          | NM_145384:243            | Pqlc2         | INSIDE                 | 0.438                                                        | 0.452                          | 1914.53            | 864.68             | 0.198                          | 1516.22            | 299.80             |
| A_68_P30118688 | chr15:32175071-32175115                           | NM_009154:525            | Sema5a        | INSIDE                 | 0.438                                                        | 0.645                          | 1312.52            | 846.02             | 0.283                          | 1106.30            | 312.62             |
| A_68_P22324142 | chr3:90052208-90052252                            | NM_013901:117            | Slc39a1       | INSIDE                 | 0.438                                                        | 0.508                          | 1286.91            | 654.27             | 0.223                          | 1118.40            | 248.91             |
| A_68_P30572941 | chr16:17276967-17277011                           | NM_177473:596            | Tmem191c      | INSIDE                 | 0.438                                                        | 0.513                          | 1018.12            | 522.72             | 0.225                          | 875.56             | 197.04             |
| A_68_P32118291 | chr19:42056116-42056160                           | NM_145500:-114           | Ubt1l         | DIVERGENT_PROMOTER     | 0.438                                                        | 0.640                          | 2745.78            | 1757.67            | 0.281                          | 2175.59            | 610.50             |

| ProbeName      | Target position of probe on CpG island microarray | TargetID              | GeneSymbol    | CpG island Description | Ratio of relative methylation (TiO <sub>2</sub> -NP/Vehicle) | Sham group                     |                    |                    | TiO <sub>2</sub> -H group      |                    |                    |
|----------------|---------------------------------------------------|-----------------------|---------------|------------------------|--------------------------------------------------------------|--------------------------------|--------------------|--------------------|--------------------------------|--------------------|--------------------|
|                |                                                   |                       |               |                        |                                                              | Relative methylation (Cy5/Cy3) | Cy3 signal (Input) | Cy5 signal (MeDIP) | Relative methylation (Cy5/Cy3) | Cy3 signal (Input) | Cy5 signal (MeDIP) |
| A_68_P31092275 | chr17:23684173-23684217                           | NM_001033496:16999    | Zfp213        | DOWNSTREAM             | 0.438                                                        | 0.694                          | 1466.01            | 1017.79            | 0.304                          | 1135.55            | 345.69             |
| A_68_P20893091 | chr1:185857997-185858041                          | NM_028516:-141        | 1700056E22Rik | DIVERGENT_PROMOTER     | 0.437                                                        | 0.657                          | 861.33             | 565.99             | 0.287                          | 713.63             | 205.10             |
| A_68_P20148960 | chr1:36604078-36604122                            | NM_026241:-54         | Ankrd39       | PROMOTER               | 0.437                                                        | 0.390                          | 1415.38            | 551.80             | 0.170                          | 1034.18            | 176.20             |
| A_68_P25022917 | chr7:29415899-29415943                            | NM_175319:114         | C330005M16Rik | INSIDE                 | 0.437                                                        | 0.520                          | 1440.02            | 748.27             | 0.227                          | 1222.21            | 277.84             |
| A_68_P28175804 | chr11:118952556-118952600                         | NM_007625:-5027       | Cbx4          | PROMOTER               | 0.437                                                        | 0.467                          | 1441.59            | 672.56             | 0.204                          | 1179.66            | 240.53             |
| A_68_P25011515 | chr7:26503925-26503969                            | NM_028771:126         | Ccdc97        | INSIDE                 | 0.437                                                        | 0.397                          | 2050.70            | 813.70             | 0.173                          | 1600.72            | 277.58             |
| A_68_P23527832 | chr5:21290509-21290553                            | NM_009584:453         | Dnajc2        | INSIDE                 | 0.437                                                        | 0.671                          | 1741.11            | 1167.70            | 0.293                          | 1419.28            | 415.80             |
| A_68_P21339241 | chr2:74578701-74578745                            | NM_010468:28673       | Hoxd3         | INSIDE                 | 0.437                                                        | 0.593                          | 1239.05            | 734.25             | 0.259                          | 898.72             | 232.99             |
| A_68_P28377236 | chr12:40949170-40949214                           | NM_013562:584         | Ifrd1         | INSIDE                 | 0.437                                                        | 0.528                          | 1354.55            | 715.20             | 0.231                          | 1160.77            | 267.99             |
| A_68_P24828020 | chr6:126595162-126595206                          | NM_010595:635         | Kena1         | INSIDE                 | 0.437                                                        | 0.607                          | 1548.56            | 939.63             | 0.265                          | 1216.48            | 322.52             |
| A_68_P23006657 | chr4:70196174-70196218                            | NM_172694:-234        | Megf9         | PROMOTER               | 0.437                                                        | 0.589                          | 1971.72            | 1161.27            | 0.257                          | 1607.21            | 413.20             |
| A_68_P30575818 | chr16:17807580-17807624                           | NM_153790:10228       | Scarf2        | INSIDE                 | 0.437                                                        | 0.702                          | 1450.27            | 1018.03            | 0.306                          | 1203.90            | 368.91             |
| A_68_P32218217 | chr19:59335443-59335487                           | NM_172523:97          | Stc18a2       | INSIDE                 | 0.437                                                        | 0.375                          | 1951.34            | 730.94             | 0.164                          | 1600.79            | 261.74             |
| A_68_P31791992 | chr18:67624679-67624723                           | NM_144867:198         | Slmo1         | INSIDE                 | 0.437                                                        | 0.430                          | 1964.17            | 844.63             | 0.188                          | 1581.87            | 297.14             |
| A_68_P26239286 | chr8:125857009-125857053                          | NM_172287:418         | Spir2         | INSIDE                 | 0.437                                                        | 0.417                          | 2644.30            | 1103.38            | 0.182                          | 2061.87            | 376.19             |
| A_68_P31213636 | chr17:47825672-47825716                           | NM_001164729:-359     | Tomm6         | DIVERGENT_PROMOTER     | 0.437                                                        | 0.614                          | 1449.34            | 889.49             | 0.268                          | 1090.21            | 292.12             |
| A_68_P23200903 | chr4:109079476-109079520                          | NM_153392:-206        | Ttc39a        | PROMOTER               | 0.437                                                        | 0.469                          | 1459.99            | 684.90             | 0.205                          | 1153.72            | 236.25             |
| A_68_P24469550 | chr6:55401858-55401902                            | NM_001025372:-93      | Adcyap1r1     | PROMOTER               | 0.436                                                        | 0.548                          | 2826.73            | 1548.02            | 0.239                          | 2086.40            | 498.17             |
| A_68_P25273840 | chr7:88907783-88907827                            | NM_025997:-34         | Fam103a1      | PROMOTER               | 0.436                                                        | 0.587                          | 1312.42            | 770.10             | 0.256                          | 1072.47            | 274.12             |
| A_68_P25950855 | chr8:72807002-72807046                            | NM_001146153:127      | Homer3        | INSIDE                 | 0.436                                                        | 0.610                          | 3020.53            | 1843.68            | 0.266                          | 2430.86            | 647.54             |
| A_68_P25098706 | chr7:53632477-53632521                            | NM_010866:655         | Myod1         | INSIDE                 | 0.436                                                        | 0.656                          | 3452.43            | 2263.98            | 0.286                          | 2667.74            | 762.17             |
| A_68_P26203093 | chr8:120022311-120022355                          | NM_172285:142         | Pleg2         | INSIDE                 | 0.436                                                        | 0.441                          | 1297.85            | 572.58             | 0.192                          | 1146.51            | 220.34             |
| A_68_P32958525 | chr17:8627413-8627457                             | NM_009309:147         | T             | INSIDE                 | 0.436                                                        | 0.669                          | 1899.94            | 1271.80            | 0.292                          | 1570.06            | 458.17             |
| A_68_P23164319 | chr4:102786672-102786716                          | NM_146254:210         | Wdr78         | INSIDE                 | 0.436                                                        | 0.438                          | 2729.97            | 1196.26            | 0.191                          | 2013.77            | 384.95             |
| A_68_P21053766 | chr2:21063512-21063556                            | ENSMUST00000137984:47 |               | INSIDE                 | 0.436                                                        | 0.617                          | 4598.39            | 2836.91            | 0.269                          | 3394.23            | 913.08             |
| A_68_P24464806 | chr6:54631922-54631966                            | NM_026629:179         | 2410066E13Rik | INSIDE                 | 0.435                                                        | 0.525                          | 1947.35            | 1021.62            | 0.228                          | 1774.77            | 404.87             |
| A_68_P31108560 | chr17:26276183-26276227                           | NM_001159598:574      | Axin1         | INSIDE                 | 0.435                                                        | 1.451                          | 8023.27            | 11640.05           | 0.632                          | 5667.44            | 3580.60            |
| A_68_P23210413 | chr4:111087417-111087472                          | NM_026279:-166        | Bend5         | PROMOTER               | 0.435                                                        | 0.554                          | 1649.22            | 913.64             | 0.241                          | 1311.55            | 315.76             |
| A_68_P30588530 | chr16:20620757-20620801                           | NM_028420:573         | Camk2n2       | INSIDE                 | 0.435                                                        | 0.471                          | 2118.12            | 998.07             | 0.205                          | 1663.51            | 341.23             |
| A_68_P27364532 | chr10:94786282-94786326                           | NM_009950:427         | Cradd         | INSIDE                 | 0.435                                                        | 0.404                          | 1815.26            | 733.87             | 0.176                          | 1427.80            | 251.19             |
| A_68_P32026410 | chr19:24971751-24971795                           | NM_008022:4027        | Foxd4         | DOWNSTREAM             | 0.435                                                        | 0.395                          | 1349.91            | 532.92             | 0.172                          | 1103.84            | 189.46             |
| A_68_P24466829 | chr6:54988330-54988374                            | NM_180678:358         | Gars          | INSIDE                 | 0.435                                                        | 0.550                          | 2430.92            | 1338.08            | 0.239                          | 1941.61            | 464.96             |
| A_68_P24449064 | chr6:52156622-52156666                            | NM_010454:1979        | Hoxa6         | INSIDE                 | 0.435                                                        | 0.491                          | 1095.46            | 538.22             | 0.214                          | 920.02             | 196.71             |
| A_68_P29508896 | chr14:31764964-31765008                           | NM_011849:313         | Nek4          | INSIDE                 | 0.435                                                        | 0.666                          | 1633.10            | 1088.41            | 0.290                          | 1378.71            | 399.28             |
| A_68_P28426163 | chr12:51750413-51750457                           | NM_008858:-224        | Prkd1         | PROMOTER               | 0.435                                                        | 0.452                          | 1637.89            | 740.09             | 0.197                          | 1377.70            | 270.95             |
| A_68_P22129914 | chr3:51288525-51288569                            | NM_016858:659         | Rab33b        | INSIDE                 | 0.435                                                        | 0.480                          | 2286.28            | 1096.36            | 0.208                          | 1743.88            | 363.60             |
| A_68_P20901342 | chr1:187278951-187278995                          | NM_001033286:246      | Stc30a10      | INSIDE                 | 0.435                                                        | 0.414                          | 1573.57            | 650.90             | 0.180                          | 1299.23            | 233.87             |
| A_68_P30016102 | chr15:11329112-11329156                           | NM_033074:279         | Tars          | INSIDE                 | 0.435                                                        | 1.477                          | 2294.80            | 3389.60            | 0.643                          | 1792.16            | 1152.62            |
| A_68_P20552784 | chr1:120524752-120524796                          | NM_023755:253         | Tcfcp2l1      | INSIDE                 | 0.435                                                        | 0.553                          | 1832.94            | 1014.46            | 0.241                          | 1488.49            | 358.16             |
| A_68_P22413525 | chr3:108394707-108394751                          | NM_181400:533         | Wdr47         | INSIDE                 | 0.435                                                        | 0.486                          | 2053.26            | 997.28             | 0.211                          | 1599.90            | 338.04             |
| A_68_P27306493 | chr10:84565965-84566009                           | NM_001013028:615      | Al597468      | INSIDE                 | 0.434                                                        | 0.556                          | 1941.87            | 1079.40            | 0.241                          | 1589.97            | 383.45             |
| A_68_P30476325 | chr15:98593156-98593200                           | NM_007478:371         | Arf3          | INSIDE                 | 0.434                                                        | 0.661                          | 4392.11            | 2903.33            | 0.287                          | 3220.23            | 924.08             |
| A_68_P21580444 | chr2:121181215-121181259                          | NM_009897:-3140       | Ckmt1         | DIVERGENT_PROMOTER     | 0.434                                                        | 0.461                          | 1306.01            | 601.82             | 0.200                          | 1063.72            | 212.59             |
| A_68_P21904963 | chr2:180333140-180333184                          | NM_009936:236         | Col9a3        | INSIDE                 | 0.434                                                        | 0.609                          | 2667.80            | 1625.38            | 0.264                          | 2106.33            | 556.86             |
| A_68_P29515526 | chr14:32898628-32898679                           | NM_001047433:198      | Dph3          | INSIDE                 | 0.434                                                        | 0.537                          | 1318.22            | 708.39             | 0.233                          | 1040.87            | 242.91             |
| A_68_P30373739 | chr15:80502384-80502428                           | NM_145986:130         | Fam83f        | INSIDE                 | 0.434                                                        | 0.643                          | 1311.34            | 843.82             | 0.279                          | 1111.32            | 310.20             |
| A_68_P26025053 | chr8:88016777-88016821                            | NM_173866:283         | Gpt2          | INSIDE                 | 0.434                                                        | 0.679                          | 1680.35            | 1140.21            | 0.294                          | 1320.66            | 388.62             |
| A_68_P26622303 | chr9:71333818-71333862                            | NM_178602:-50         | Grin1a        | PROMOTER               | 0.434                                                        | 0.403                          | 2113.33            | 851.67             | 0.175                          | 1713.63            | 299.51             |
| A_68_P28279800 | chr12:21291772-21291816                           | NM_008403:304         | Itgblbp1      | INSIDE                 | 0.434                                                        | 0.300                          | 1716.13            | 514.83             | 0.130                          | 1348.71            | 175.47             |
| A_68_P27924627 | chr11:74987037-74987081                           | NR_029546:-125        | Mir132        | PROMOTER               | 0.434                                                        | 0.692                          | 2353.48            | 1629.06            | 0.300                          | 1962.89            | 589.02             |
| A_68_P31866349 | chr18:80910082-80910126                           | NM_001164110:-294     | Nfat1         | PROMOTER               | 0.434                                                        | 0.568                          | 2641.35            | 1501.07            | 0.247                          | 2097.65            | 517.57             |

| ProbeName      | Target position of probe on CpG island microarray | TargetID               | GeneSymbol    | CpG island Description | Ratio of relative methylation (TiO <sub>2</sub> -NP/Vehicle) | Sham group                     |                    |                    | TiO <sub>2</sub> -H group      |                    |                    |
|----------------|---------------------------------------------------|------------------------|---------------|------------------------|--------------------------------------------------------------|--------------------------------|--------------------|--------------------|--------------------------------|--------------------|--------------------|
|                |                                                   |                        |               |                        |                                                              | Relative methylation (Cy5/Cy3) | Cy3 signal (Input) | Cy5 signal (MeDIP) | Relative methylation (Cy5/Cy3) | Cy3 signal (Input) | Cy5 signal (MeDIP) |
| A_68_P22220267 | chr3:69120847-69120891                            | NM_178726:29           | Ppm1l         | INSIDE                 | 0.434                                                        | 0.545                          | 2515.36            | 1370.78            | 0.236                          | 1904.22            | 450.07             |
| A_68_P22341989 | chr3:94846418-94846462                            | NM_008951:27           | Psmc4         | INSIDE                 | 0.434                                                        | 0.561                          | 1911.42            | 1072.31            | 0.243                          | 1493.72            | 363.34             |
| A_68_P21557415 | chr2:117168712-117168756                          | NM_011246:-121         | Rasgrp1       | PROMOTER               | 0.434                                                        | 0.597                          | 1661.08            | 991.78             | 0.259                          | 1394.04            | 361.06             |
| A_68_P26344897 | chr9:20781232-20781276                            | NM_010333:-17          | S1pr2         | PROMOTER               | 0.434                                                        | 1.480                          | 2047.13            | 3029.62            | 0.643                          | 1398.76            | 899.34             |
| A_68_P28936499 | chr13:34169593-34169637                           | NM_009450:263          | Tubb2a        | INSIDE                 | 0.434                                                        | 0.707                          | 3359.06            | 2376.05            | 0.307                          | 2486.24            | 763.25             |
| A_68_P23547920 | chr5:25035394-25035438                            | NR_027388:-419         | 1700096K18Rik | PROMOTER               | 0.433                                                        | 0.574                          | 3576.99            | 2052.69            | 0.249                          | 2768.49            | 688.25             |
| A_68_P27282447 | chr10:79783116-79783160                           | NM_025521:155          | 2310011J03Rik | INSIDE                 | 0.433                                                        | 0.599                          | 5286.50            | 3169.06            | 0.260                          | 3798.53            | 986.03             |
| A_68_P24052416 | chr5:123271272-123271316                          | NM_001042491:54        | Anapc5        | INSIDE                 | 0.433                                                        | 0.665                          | 1214.00            | 806.95             | 0.288                          | 1049.39            | 302.30             |
| A_68_P21423815 | chr2:91490335-91490379                            | NM_146124:-3008        | Arhgap1       | PROMOTER               | 0.433                                                        | 0.569                          | 991.08             | 563.92             | 0.246                          | 809.93             | 199.52             |
| A_68_P31151212 | chr17:34088387-34088432                           | NM_019420:24           | B3galt4       | INSIDE                 | 0.433                                                        | 0.350                          | 2374.68            | 831.92             | 0.152                          | 1767.64            | 268.00             |
| A_68_P30684012 | chr16:38089843-38089887                           | NR_033221:-518         | BC031361      | PROMOTER               | 0.433                                                        | 0.387                          | 1469.59            | 568.10             | 0.167                          | 1398.26            | 234.14             |
| A_68_P26467525 | chr9:44225880-44225924                            | NM_201372:188          | Ccdc84        | INSIDE                 | 0.433                                                        | 0.632                          | 3188.92            | 2014.72            | 0.274                          | 2379.71            | 650.91             |
| A_68_P24820862 | chr6:125444303-125444347                          | NM_007657:449          | Cd9           | INSIDE                 | 0.433                                                        | 0.582                          | 1893.00            | 1102.63            | 0.252                          | 1613.75            | 407.23             |
| A_68_P32143271 | chr19:46402975-46403019                           | NM_133694:323          | Fbx115        | INSIDE                 | 0.433                                                        | 0.654                          | 1719.17            | 1123.56            | 0.283                          | 1417.27            | 400.83             |
| A_68_P23611439 | chr5:37482314-37482358                            | NM_178394:40241        | Jakmip1       | INSIDE                 | 0.433                                                        | 0.619                          | 2076.52            | 1285.31            | 0.268                          | 1717.12            | 460.57             |
| A_68_P25368688 | chr7:107756761-107756805                          | NR_003559:-272         | Mrp148        | PROMOTER               | 0.433                                                        | 0.488                          | 1437.47            | 702.13             | 0.212                          | 1100.89            | 233.06             |
| A_68_P20011680 | chr1:6204723-6204767                              | NM_009826:2            | Rblcc1        | INSIDE                 | 0.433                                                        | 0.385                          | 1750.61            | 674.21             | 0.167                          | 1388.61            | 231.75             |
| A_68_P28328450 | chr12:31596678-31596722                           | NM_013709:167          | Sh3yl1        | INSIDE                 | 0.433                                                        | 0.687                          | 1307.89            | 898.56             | 0.297                          | 1149.46            | 341.59             |
| A_68_P22031742 | chr3:30994277-30994321                            | NM_001039090:316       | Skil          | INSIDE                 | 0.433                                                        | 0.684                          | 5333.16            | 3650.43            | 0.296                          | 4142.42            | 1227.29            |
| A_68_P28154494 | chr11:115488974-115489018                         | NM_026071:457          | Sle25a19      | INSIDE                 | 0.433                                                        | 0.633                          | 862.56             | 546.39             | 0.274                          | 711.16             | 195.15             |
| A_68_P23607365 | chr5:36740222-36740266                            | NM_030889:544          | Sores2        | INSIDE                 | 0.433                                                        | 0.596                          | 1044.48            | 622.61             | 0.258                          | 879.21             | 227.18             |
| A_68_P28054175 | chr11:97914595-97914639                           | NM_146028:160          | Stac2         | INSIDE                 | 0.433                                                        | 0.528                          | 3682.99            | 1946.43            | 0.229                          | 2753.77            | 630.78             |
| A_68_P24117827 | chr5:136254305-136254349                          | NM_029659:-71          | Styx11        | DIVERGENT_PROMOTER     | 0.433                                                        | 0.535                          | 1742.21            | 931.42             | 0.231                          | 1395.04            | 322.94             |
| A_68_P28871637 | chr13:21292413-21292457                           | NM_009054:20607        | Trim27        | DOWNSTREAM             | 0.433                                                        | 0.518                          | 1248.32            | 647.22             | 0.225                          | 964.05             | 216.53             |
| A_68_P28155497 | chr11:115676636-115676680                         | NM_029557:606          | Tsen54        | INSIDE                 | 0.433                                                        | 0.595                          | 975.44             | 580.67             | 0.258                          | 697.46             | 179.61             |
| A_68_P31791610 | chr18:67551054-67551098                           | NM_026473:692          | Tubb6         | INSIDE                 | 0.433                                                        | 0.494                          | 1698.06            | 838.42             | 0.214                          | 1422.44            | 304.23             |
| A_68_P24385308 | chr6:39822333-39822377                            |                        | Unknown       |                        | 0.433                                                        | 0.450                          | 1370.33            | 616.06             | 0.195                          | 996.89             | 194.07             |
| A_68_P31801898 | chr18:69358247-69358291                           | AK080553:494           |               | INSIDE                 | 0.433                                                        | 0.690                          | 3138.24            | 2166.37            | 0.299                          | 2347.69            | 702.46             |
| A_68_P22947349 | chr4:57794962-57795006                            | ENSMUST00000124581:-67 |               | PROMOTER               | 0.433                                                        | 0.629                          | 2259.04            | 1420.75            | 0.272                          | 2078.42            | 566.37             |
| A_68_P28747155 | chr12:113204858-113204902                         | NM_027360:308          | 2010107E04Rik | INSIDE                 | 0.432                                                        | 0.537                          | 1594.75            | 856.04             | 0.232                          | 1321.24            | 306.72             |
| A_68_P29448496 | chr14:21526704-21526748                           | NM_027996:-47          | 2310021P13Rik | PROMOTER               | 0.432                                                        | 0.493                          | 1547.75            | 762.95             | 0.213                          | 1138.01            | 242.17             |
| A_68_P28195050 | chr12:3427455-3427499                             | NM_172421:593          | Asx12         | INSIDE                 | 0.432                                                        | 0.652                          | 2722.75            | 1775.44            | 0.282                          | 1964.95            | 554.15             |
| A_68_P24797813 | chr6:120244449-120244493                          | NM_198884:107          | B4galnt3      | INSIDE                 | 0.432                                                        | 0.596                          | 1611.33            | 960.49             | 0.258                          | 1288.11            | 331.77             |
| A_68_P21075526 | chr2:25837853-25837902                            | NM_001115076:925       | Camsap1       | INSIDE                 | 0.432                                                        | 0.652                          | 1123.64            | 733.04             | 0.282                          | 904.28             | 254.82             |
| A_68_P26971602 | chr10:17443634-17443678                           | NM_010828:623          | Cited2        | INSIDE                 | 0.432                                                        | 0.712                          | 3830.13            | 2727.47            | 0.307                          | 2974.75            | 914.53             |
| A_68_P30895371 | chr16:78301854-78301898                           | NM_001025192:-59       | Cxadr         | PROMOTER               | 0.432                                                        | 0.542                          | 1773.20            | 961.47             | 0.234                          | 1472.04            | 344.71             |
| A_68_P28729569 | chr12:109940441-109940485                         | NM_001171002:54        | Degs2         | INSIDE                 | 0.432                                                        | 0.678                          | 1110.84            | 753.56             | 0.293                          | 925.58             | 271.52             |
| A_68_P23203729 | chr4:109650347-109650391                          | NM_172296:-261         | Dmrta2        | PROMOTER               | 0.432                                                        | 0.401                          | 3107.48            | 1247.05            | 0.174                          | 2233.97            | 387.65             |
| A_68_P21909706 | chr2:181022876-181022920                          | NM_198169:-227         | Gmeb2         | PROMOTER               | 0.432                                                        | 0.624                          | 1107.72            | 691.60             | 0.270                          | 859.57             | 231.79             |
| A_68_P26826863 | chr9:110856302-110856347                          | NM_028838:2276         | Lrre2         | INSIDE                 | 0.432                                                        | 0.537                          | 1024.14            | 549.76             | 0.232                          | 762.17             | 176.69             |
| A_68_P24993428 | chr7:20044025-20044069                            | NM_172279:-203         | Mark4         | PROMOTER               | 0.432                                                        | 0.471                          | 1471.90            | 693.97             | 0.204                          | 1226.71            | 249.76             |
| A_68_P23567792 | chr5:29805215-29805259                            | NM_019944:-226         | Mnx1          | PROMOTER               | 0.432                                                        | 0.649                          | 2226.04            | 1445.38            | 0.281                          | 1642.90            | 460.89             |
| A_68_P30477985 | chr15:98885628-98885672                           | NM_001163588:46        | Prph          | INSIDE                 | 0.432                                                        | 0.736                          | 3231.96            | 2379.82            | 0.318                          | 2337.44            | 743.16             |
| A_68_P24045427 | chr5:122043186-122043230                          | NM_009656:625          | Alhd2         | INSIDE                 | 0.431                                                        | 0.585                          | 1349.74            | 789.32             | 0.252                          | 1113.59            | 280.38             |
| A_68_P27560709 | chr11:4887252-4887296                             | NM_007454:367          | Ap1b1         | INSIDE                 | 0.431                                                        | 0.512                          | 2650.54            | 1356.04            | 0.221                          | 1850.24            | 408.37             |
| A_68_P25954407 | chr8:73363491-73363535                            | NM_027560:107          | Arred2        | INSIDE                 | 0.431                                                        | 0.629                          | 4802.10            | 3020.09            | 0.271                          | 3083.84            | 836.07             |
| A_68_P25782090 | chr8:36889097-36889141                            | NM_027998:495          | Cldn23        | INSIDE                 | 0.431                                                        | 0.540                          | 1860.05            | 1004.54            | 0.233                          | 1281.82            | 298.48             |
| A_68_P31260713 | chr17:57386929-57386973                           | NM_030084:114          | Gpr108        | INSIDE                 | 0.431                                                        | 0.560                          | 1295.83            | 725.49             | 0.241                          | 933.64             | 225.09             |
| A_68_P28083441 | chr11:102979217-102979261                         | NM_138753:1600         | Hexim1        | INSIDE                 | 0.431                                                        | 0.680                          | 1269.78            | 863.31             | 0.293                          | 1059.33            | 310.43             |
| A_68_P22210773 | chr3:67386862-67386906                            | NM_025813:195          | Mfsd1         | INSIDE                 | 0.431                                                        | 0.436                          | 1431.44            | 623.47             | 0.188                          | 1098.19            | 206.25             |
| A_68_P22606647 | chr3:144781543-144781587                          | NM_025714:1            | Odf1l         | INSIDE                 | 0.431                                                        | 0.515                          | 2321.62            | 1194.95            | 0.222                          | 1838.55            | 408.21             |

| ProbeName      | Target position of probe on CpG island microarray | TargetID                 | GeneSymbol    | CpG island Description | Ratio of relative methylation (TiO <sub>2</sub> -NP/Vehicle) | Sham group                     |                    |                    | TiO <sub>2</sub> -H group      |                    |                    |
|----------------|---------------------------------------------------|--------------------------|---------------|------------------------|--------------------------------------------------------------|--------------------------------|--------------------|--------------------|--------------------------------|--------------------|--------------------|
|                |                                                   |                          |               |                        |                                                              | Relative methylation (Cy5/Cy3) | Cy3 signal (Input) | Cy5 signal (MeDIP) | Relative methylation (Cy5/Cy3) | Cy3 signal (Input) | Cy5 signal (MeDIP) |
| A_68_P31621135 | chr18:36124744-36124788                           | NM_028707:278            | Psd2          | INSIDE                 | 0.431                                                        | 0.516                          | 1453.25            | 750.11             | 0.222                          | 1191.44            | 264.85             |
| A_68_P27950225 | chr11:79474212-79474256                           | NM_175543:69521          | Rab11fip4     | INSIDE                 | 0.431                                                        | 0.657                          | 1815.22            | 1192.45            | 0.283                          | 1417.94            | 401.57             |
| A_68_P26567740 | chr9:61761969-61762013                            | NM_018853:327            | Rplp1         | INSIDE                 | 0.431                                                        | 0.585                          | 2880.40            | 1683.88            | 0.252                          | 2159.08            | 544.13             |
| A_68_P20250375 | chr1:57026759-57026807                            | NM_139146:1396           | Satb2         | INSIDE                 | 0.431                                                        | 0.673                          | 1459.32            | 981.68             | 0.290                          | 1126.26            | 326.72             |
| A_68_P23993055 | chr5:113006360-113006404                          | NM_019982:-177           | Sez6l         | PROMOTER               | 0.431                                                        | 0.471                          | 1700.24            | 800.51             | 0.203                          | 1326.27            | 268.88             |
| A_68_P26996378 | chr10:21714127-21714171                           | NM_011361:-323           | Sgk1          | PROMOTER               | 0.431                                                        | 0.625                          | 1978.07            | 1236.73            | 0.270                          | 1444.33            | 389.40             |
| A_68_P27277986 | chr10:79100770-79100814                           | NM_001024539:-129        | Shc2          | PROMOTER               | 0.431                                                        | 0.504                          | 1121.40            | 564.70             | 0.217                          | 942.73             | 204.84             |
| A_68_P30405823 | chr15:86045014-86045058                           | NM_145476:148            | Tbc1d22a      | INSIDE                 | 0.431                                                        | 1.568                          | 5816.42            | 9120.58            | 0.677                          | 3995.28            | 2702.95            |
| A_68_P25948613 | chr8:72426109-72426153                            | NM_032004:17             | Tssk6         | INSIDE                 | 0.431                                                        | 0.712                          | 3179.15            | 2263.23            | 0.307                          | 2270.51            | 697.43             |
| A_68_P25670556 | chr8:13785998-13786042                            | NM_025924:406            | Upf3a         | INSIDE                 | 0.431                                                        | 0.710                          | 2540.02            | 1802.82            | 0.306                          | 1946.37            | 595.74             |
| A_68_P30489511 | chr15:100909418-100909462                         | AK078004:-29             |               | PROMOTER               | 0.431                                                        | 0.598                          | 1274.62            | 761.78             | 0.258                          | 998.44             | 257.36             |
| A_68_P20631365 | chr1:135989841-135989885                          | AK155907:5872            |               | DOWNSTREAM             | 0.431                                                        | 0.431                          | 2339.05            | 1008.26            | 0.186                          | 1874.79            | 348.43             |
| A_68_P22291856 | chr3:84386605-84386649                            | NM_001081093:-79         | Arfp1         | PROMOTER               | 0.430                                                        | 0.554                          | 1121.05            | 621.23             | 0.238                          | 1009.01            | 240.25             |
| A_68_P26075475 | chr8:96622393-96622437                            | NM_026116:297            | Bbs2          | INSIDE                 | 0.430                                                        | 0.383                          | 1914.53            | 733.23             | 0.165                          | 1329.59            | 219.11             |
| A_68_P25093840 | chr7:52825839-52825883                            | NM_009737:128            | Beat2         | INSIDE                 | 0.430                                                        | 0.404                          | 2126.05            | 858.33             | 0.174                          | 1831.57            | 318.13             |
| A_68_P30113000 | chr15:31153773-31153829                           | NM_146057:-339           | Dap           | PROMOTER               | 0.430                                                        | 0.513                          | 1044.05            | 536.10             | 0.221                          | 821.01             | 181.12             |
| A_68_P24586430 | chr6:81991869-81991913                            | NM_145570:269            | Fam176a       | INSIDE                 | 0.430                                                        | 0.583                          | 1250.34            | 729.02             | 0.251                          | 1000.94            | 251.16             |
| A_68_P28084317 | chr11:103128474-103128518                         | NM_016896:219            | Map3k14       | INSIDE                 | 0.430                                                        | 0.677                          | 2901.94            | 1963.69            | 0.291                          | 2093.48            | 609.49             |
| A_68_P28084319 | chr11:103128781-103128825                         | NM_016896:-87            | Map3k14       | PROMOTER               | 0.430                                                        | 0.489                          | 1810.48            | 884.93             | 0.210                          | 1355.08            | 284.85             |
| A_68_P31100481 | chr17:25073380-25073424                           | NM_001163447:520         | Mapk8ip3      | INSIDE                 | 0.430                                                        | 0.494                          | 1770.02            | 875.20             | 0.213                          | 1269.58            | 270.08             |
| A_68_P21151178 | chr2:38780768-38780812                            | NM_010264:1191           | Nr6a1         | INSIDE                 | 0.430                                                        | 0.727                          | 3471.77            | 2523.33            | 0.312                          | 2582.24            | 806.87             |
| A_68_P25368680 | chr7:107755893-107755937                          | NM_001163663:-185        | Rab6          | PROMOTER               | 0.430                                                        | 0.707                          | 3728.15            | 2634.93            | 0.304                          | 2431.82            | 739.73             |
| A_68_P22450159 | chr3:116297548-116297592                          | NM_028349:-355           | Sass6         | PROMOTER               | 0.430                                                        | 0.525                          | 1549.58            | 813.48             | 0.226                          | 1281.98            | 289.46             |
| A_68_P25016883 | chr7:28140851-28140895                            | NM_138676:155            | Shkbp1        | INSIDE                 | 0.430                                                        | 0.495                          | 3331.24            | 1648.27            | 0.213                          | 2575.41            | 547.99             |
| A_68_P20354817 | chr1:75543227-75543271                            | NM_009208:408            | Slc4a3        | INSIDE                 | 0.430                                                        | 0.555                          | 4935.41            | 2738.41            | 0.239                          | 3596.93            | 858.77             |
| A_68_P25007552 | chr7:25740356-25740400                            |                          |               | Unknown                | 0.430                                                        | 0.573                          | 4139.66            | 2372.16            | 0.246                          | 2911.10            | 717.35             |
| A_68_P20826030 | chr1:173000636-173000680                          | ENSMUST00000164179:-5592 |               | PROMOTER               | 0.430                                                        | 0.494                          | 5689.08            | 2813.03            | 0.213                          | 4510.99            | 958.65             |
| A_68_P27542784 | chr10:128141723-128141767                         | NM_016756:363            | Cdk2          | INSIDE                 | 0.429                                                        | 0.608                          | 1592.16            | 968.65             | 0.261                          | 1257.00            | 327.89             |
| A_68_P28778248 | chr12:119437069-119437113                         | NM_010060:426            | Dnahc11       | INSIDE                 | 0.429                                                        | 0.600                          | 1767.16            | 1059.95            | 0.257                          | 1351.87            | 347.71             |
| A_68_P23927139 | chr5:100407949-100407993                          | NM_001077265:-13         | Hnrnpd        | PROMOTER               | 0.429                                                        | 0.391                          | 2458.35            | 960.66             | 0.168                          | 1988.35            | 333.70             |
| A_68_P32134218 | chr19:44831888-44831933                           | NM_011037:27             | Pax2          | INSIDE                 | 0.429                                                        | 0.555                          | 3005.41            | 1667.93            | 0.238                          | 2302.50            | 547.97             |
| A_68_P24829780 | chr6:126889329-126889373                          | NM_009013:223            | Rad51ap1      | INSIDE                 | 0.429                                                        | 0.705                          | 3601.47            | 2537.98            | 0.302                          | 2733.45            | 825.52             |
| A_68_P28036069 | chr11:94871187-94871231                           | NM_146025:16             | Samd14        | INSIDE                 | 0.429                                                        | 0.511                          | 1098.60            | 560.89             | 0.219                          | 888.67             | 194.42             |
| A_68_P30642392 | chr16:30550884-30550928                           | NM_172614:-242           | Tmem44        | PROMOTER               | 0.429                                                        | 0.604                          | 2111.36            | 1275.91            | 0.259                          | 1651.61            | 428.19             |
| A_68_P22362402 | chr3:98945208-98945252                            | NM_027462:218            | Wars2         | INSIDE                 | 0.429                                                        | 0.445                          | 1547.83            | 688.13             | 0.191                          | 1188.20            | 226.60             |
| A_68_P24127316 | chr5:138182800-138182844                          | NM_175521:-1596          | 6430598A04Rik | DIVERGENT_PROMOTER     | 0.428                                                        | 0.443                          | 1275.80            | 565.77             | 0.190                          | 1132.49            | 214.71             |
| A_68_P22451304 | chr3:116510918-116510962                          | NM_001081326:144         | Ag1           | INSIDE                 | 0.428                                                        | 0.535                          | 1294.85            | 692.82             | 0.229                          | 1035.02            | 236.91             |
| A_68_P24039809 | chr5:121063031-121063075                          | NM_028041:-86            | Ddx54         | DIVERGENT_PROMOTER     | 0.428                                                        | 0.505                          | 1103.35            | 556.80             | 0.216                          | 981.25             | 212.11             |
| A_68_P31065256 | chr17:15512298-15512342                           | NM_007865:467            | Dll1          | INSIDE                 | 0.428                                                        | 1.381                          | 2803.51            | 3870.71            | 0.591                          | 2321.68            | 1371.13            |
| A_68_P31610604 | chr18:34166101-34166145                           | NM_013512:738            | Epb4.14a      | INSIDE                 | 0.428                                                        | 0.570                          | 2976.61            | 1696.24            | 0.244                          | 2147.76            | 523.49             |
| A_68_P22369560 | chr3:100293076-100293120                          | NM_001142952:17          | Fam46c        | INSIDE                 | 0.428                                                        | 0.481                          | 4172.15            | 2006.74            | 0.206                          | 3200.67            | 659.17             |
| A_68_P22346159 | chr3:95686322-95686366                            | NM_001033302:-193        | Gm129         | PROMOTER               | 0.428                                                        | 0.460                          | 1798.38            | 827.42             | 0.197                          | 1429.60            | 281.50             |
| A_68_P21054862 | chr2:21289571-21289618                            | NM_001004761:401         | Gpr158        | INSIDE                 | 0.428                                                        | 0.553                          | 984.62             | 544.69             | 0.237                          | 837.31             | 198.19             |
| A_68_P20442334 | chr1:93310020-93310067                            | NM_019479:-244           | Hes6          | PROMOTER               | 0.428                                                        | 0.626                          | 971.17             | 607.78             | 0.268                          | 735.86             | 196.96             |
| A_68_P28066376 | chr11:100006643-100006687                         | NM_008471:569            | Krt19         | INSIDE                 | 0.428                                                        | 0.638                          | 1553.77            | 991.90             | 0.273                          | 1163.22            | 317.88             |
| A_68_P31220005 | chr17:49071091-49071135                           | NM_027452:-794           | Lrnf2         | PROMOTER               | 0.428                                                        | 0.459                          | 1700.17            | 780.47             | 0.196                          | 1290.14            | 253.30             |
| A_68_P23278139 | chr4:125773830-125773874                          | NM_001163266:-44         | Lsm10         | PROMOTER               | 0.428                                                        | 0.502                          | 1899.41            | 953.03             | 0.215                          | 1425.24            | 306.22             |
| A_68_P20293520 | chr1:64664228-64664272                            | NM_025964:-508           | Mett21a       | PROMOTER               | 0.428                                                        | 0.546                          | 1851.72            | 1011.72            | 0.234                          | 1475.13            | 344.59             |
| A_68_P27553117 | chr11:3549252-3549296                             | NM_001159288:-222        | Morc2a        | DIVERGENT_PROMOTER     | 0.428                                                        | 0.415                          | 1488.45            | 617.90             | 0.178                          | 1220.63            | 217.11             |
| A_68_P20450137 | chr1:94538493-94538537                            | NR_028108:11             | Myeov2        | INSIDE                 | 0.428                                                        | 0.339                          | 3227.05            | 1092.73            | 0.145                          | 2584.01            | 374.18             |
| A_68_P31735610 | chr18:57514422-57514466                           | NM_028447:58             | Prrc1         | INSIDE                 | 0.428                                                        | 0.533                          | 3461.36            | 1846.17            | 0.228                          | 2669.48            | 609.54             |

| ProbeName      | Target position of probe on CpG island microarray | TargetID               | GeneSymbol    | CpG island Description | Ratio of relative methylation (TiO <sub>2</sub> -NP/Vehicle) | Sham group                     |                    |                    | TiO <sub>2</sub> -H group      |                    |                    |
|----------------|---------------------------------------------------|------------------------|---------------|------------------------|--------------------------------------------------------------|--------------------------------|--------------------|--------------------|--------------------------------|--------------------|--------------------|
|                |                                                   |                        |               |                        |                                                              | Relative methylation (Cy5/Cy3) | Cy3 signal (Input) | Cy5 signal (MeDIP) | Relative methylation (Cy5/Cy3) | Cy3 signal (Input) | Cy5 signal (MeDIP) |
| A_68_P26825596 | chr9:110646504-110646548                          | NM_001083935-336       | Pth1r         | PROMOTER               | 0.428                                                        | 0.556                          | 1547.35            | 860.35             | 0.238                          | 1146.31            | 272.69             |
| A_68_P31020008 | chr17:5941641-5941685                             | NM_001113352:383       | Synj2         | INSIDE                 | 0.428                                                        | 0.643                          | 1695.65            | 1090.26            | 0.275                          | 1397.27            | 384.47             |
| A_68_P23430517 | chr4:153673893-153673937                          | NM_001112744:90        | Arhgef16      | INSIDE                 | 0.427                                                        | 0.712                          | 1902.35            | 1355.25            | 0.304                          | 1498.03            | 456.01             |
| A_68_P21673355 | chr2:138082825-138082869                          | NM_001025431:527       | Btdb3         | INSIDE                 | 0.427                                                        | 0.424                          | 1382.18            | 586.22             | 0.181                          | 991.91             | 179.61             |
| A_68_P20351048 | chr1:74931966-74932010                            | NM_153111:-6           | Fev           | PROMOTER               | 0.427                                                        | 0.656                          | 1876.17            | 1230.17            | 0.280                          | 1690.43            | 473.23             |
| A_68_P31759174 | chr18:61852045-61852089                           | NM_019508:4478         | Il17b         | INSIDE                 | 0.427                                                        | 0.524                          | 1291.49            | 676.38             | 0.224                          | 892.38             | 199.63             |
| A_68_P26531904 | chr9:55394018-55394062                            | NM_027397:5085         | Isl2          | DOWNSTREAM             | 0.427                                                        | 0.331                          | 1731.85            | 572.49             | 0.141                          | 1133.06            | 159.91             |
| A_68_P29616405 | chr14:55733423-55733480                           | NM_177049:2321         | Jph4          | INSIDE                 | 0.427                                                        | 7.920                          | 2258.91            | 17890.37           | 3.382                          | 1539.32            | 5205.58            |
| A_68_P24129161 | chr5:138612875-138612919                          | NR_029658:-5850        | Mir106b       | PROMOTER               | 0.427                                                        | 0.734                          | 4243.44            | 3116.55            | 0.314                          | 2961.70            | 929.12             |
| A_68_P25955964 | chr8:73796836-73796880                            | NM_001142322:246       | Myo9b         | INSIDE                 | 0.427                                                        | 0.699                          | 2481.41            | 1734.07            | 0.299                          | 1887.62            | 563.56             |
| A_68_P30778928 | chr16:56029876-56029920                           | NM_001024622:-68       | Pcnp          | PROMOTER               | 0.427                                                        | 0.540                          | 1618.80            | 874.03             | 0.230                          | 1205.16            | 277.78             |
| A_68_P26469281 | chr9:44542040-44542084                            | NM_153537:1215         | Phldb1        | INSIDE                 | 0.427                                                        | 0.714                          | 4272.68            | 3050.03            | 0.305                          | 3273.45            | 998.91             |
| A_68_P28072822 | chr11:101107992-101108036                         | NM_019444:367          | Ramp2         | INSIDE                 | 0.427                                                        | 0.617                          | 1396.03            | 861.11             | 0.263                          | 1052.20            | 276.94             |
| A_68_P22312797 | chr3:88058696-88058740                            | NM_021375:-112         | Rhbga         | PROMOTER               | 0.427                                                        | 0.518                          | 1100.66            | 569.84             | 0.221                          | 865.57             | 191.15             |
| A_68_P25834905 | chr8:47296158-47296202                            | NM_007450:183          | Ste25a4       | INSIDE                 | 0.427                                                        | 0.363                          | 3243.34            | 1176.72            | 0.155                          | 2452.80            | 380.33             |
| A_68_P31054933 | chr17:13200672-13200716                           | NM_013671:-10          | Sod2          | PROMOTER               | 0.427                                                        | 0.497                          | 1484.39            | 737.22             | 0.212                          | 1216.75            | 264.61             |
| A_68_P26875193 | chr9:119846837-119846881                          | NM_028735:135          | Tte21a        | INSIDE                 | 0.427                                                        | 0.588                          | 1305.35            | 767.49             | 0.251                          | 976.75             | 245.21             |
| A_68_P24066628 | chr5:125870372-125870416                          | NM_019639:-7           | Ubc           | PROMOTER               | 0.427                                                        | 0.549                          | 1991.27            | 1093.22            | 0.234                          | 1505.86            | 352.80             |
| A_68_P28729766 | chr12:109996154-109996198                         |                        |               | Unknown                | 0.427                                                        | 0.516                          | 2795.74            | 1441.97            | 0.220                          | 2269.90            | 499.67             |
| A_68_P30367722 | chr15:79489390-79489434                           | NM_029407:-26          | 4933432B09Rik | DIVERGENT_PROMOTER     | 0.426                                                        | 0.502                          | 1548.19            | 776.84             | 0.214                          | 1181.94            | 252.65             |
| A_68_P21110672 | chr2:31543979-31544023                            | NM_001112703:-75       | Abl1          | PROMOTER               | 0.426                                                        | 0.339                          | 2003.50            | 680.11             | 0.144                          | 1675.62            | 242.06             |
| A_68_P26716243 | chr9:90058080-90058124                            | NM_001003911:287       | Adams7        | INSIDE                 | 0.426                                                        | 0.622                          | 3260.24            | 2027.74            | 0.265                          | 2504.27            | 662.96             |
| A_68_P27279758 | chr10:79389293-79389337                           | NM_007880:-502         | Arid3a        | PROMOTER               | 0.426                                                        | 0.472                          | 1199.10            | 565.47             | 0.201                          | 934.58             | 187.72             |
| A_68_P31095796 | chr17:24306345-24306389                           | NR_037854:-26          | Atp6v0c-ps2   | PROMOTER               | 0.426                                                        | 0.579                          | 2335.57            | 1352.31            | 0.247                          | 1816.59            | 447.87             |
| A_68_P21425364 | chr2:91761807-91761851                            | NM_007699:-517         | Chrm4         | PROMOTER               | 0.426                                                        | 0.563                          | 1003.42            | 564.90             | 0.240                          | 792.85             | 190.09             |
| A_68_P23202061 | chr4:109349433-109349477                          | NM_007983:223          | Faf1          | INSIDE                 | 0.426                                                        | 0.363                          | 1627.53            | 590.92             | 0.155                          | 1325.49            | 204.86             |
| A_68_P25528903 | chr7:138686351-138686395                          | NM_008257:-104         | Hmx3          | PROMOTER               | 0.426                                                        | 0.430                          | 1802.03            | 775.35             | 0.183                          | 1528.16            | 280.03             |
| A_68_P23352779 | chr4:139131562-139131606                          | NM_001205173:950       | Iffo2         | INSIDE                 | 0.426                                                        | 0.661                          | 998.98             | 660.53             | 0.282                          | 773.34             | 217.78             |
| A_68_P31100079 | chr17:25023157-25023201                           | NM_011956:117          | Nubp2         | INSIDE                 | 0.426                                                        | 0.469                          | 5167.57            | 2423.85            | 0.200                          | 3511.20            | 701.20             |
| A_68_P26706481 | chr9:87634446-87634490                            | NM_023814:-8373        | Tbx18         | PROMOTER               | 0.426                                                        | 0.636                          | 1528.24            | 972.50             | 0.271                          | 1240.49            | 336.63             |
| A_68_P25459062 | chr7:125727948-125727992                          | NM_172476:230          | Tmc7          | INSIDE                 | 0.426                                                        | 0.646                          | 1991.21            | 1286.03            | 0.275                          | 1416.69            | 389.44             |
| A_68_P24076587 | chr5:127722499-127722543                          | NM_175432:325          | Tmem132c      | INSIDE                 | 0.426                                                        | 0.613                          | 2255.62            | 1381.85            | 0.261                          | 1684.29            | 439.13             |
| A_68_P27563772 | chr11:5421438-5421482                             | NM_013842:491          | Xbp1          | INSIDE                 | 0.426                                                        | 0.461                          | 1736.71            | 800.62             | 0.196                          | 1362.88            | 267.49             |
| A_68_P21851439 | chr2:169959243-169959287                          | NM_001033299:-2544     | Zfp217        | PROMOTER               | 0.426                                                        | 0.618                          | 1178.79            | 728.96             | 0.264                          | 949.40             | 250.32             |
| A_68_P27837321 | chr11:59319755-59319799                           | NM_001130529:366       | Zkscan17      | INSIDE                 | 0.426                                                        | 0.460                          | 1368.04            | 629.36             | 0.196                          | 1124.79            | 322.04             |
| A_68_P31465579 | chr18:4922163-4922209                             | ENSMUST00000143254:463 |               | INSIDE                 | 0.426                                                        | 0.612                          | 1533.56            | 939.00             | 0.261                          | 1233.66            | 220.27             |
| A_68_P26584997 | chr9:64808465-64808509                            | NM_001077631:-152      | 2010321M09Rik | DIVERGENT_PROMOTER     | 0.425                                                        | 0.646                          | 1408.86            | 910.69             | 0.275                          | 1177.75            | 323.77             |
| A_68_P29484385 | chr14:27783967-27784011                           | NM_145221:-251         | Appl1         | PROMOTER               | 0.425                                                        | 0.571                          | 1575.58            | 900.31             | 0.243                          | 1334.00            | 323.64             |
| A_68_P31616437 | chr18:35278200-35278244                           | NM_009818:-343         | Ctnna1        | PROMOTER               | 0.425                                                        | 0.613                          | 1314.59            | 806.16             | 0.261                          | 1136.59            | 296.11             |
| A_68_P30244835 | chr15:57723554-57723598                           | NM_024207:397          | Der1l         | INSIDE                 | 0.425                                                        | 0.522                          | 2550.26            | 1331.81            | 0.222                          | 2025.95            | 449.64             |
| A_68_P20366327 | chr1:77511720-77511764                            | NM_007936:-79          | Epha4         | PROMOTER               | 0.425                                                        | 0.615                          | 5264.01            | 3234.77            | 0.261                          | 3695.72            | 966.32             |
| A_68_P24025033 | chr5:118619514-118619558                          | NM_007545:-236         | Hrk           | PROMOTER               | 0.425                                                        | 0.690                          | 2723.58            | 1877.93            | 0.293                          | 1906.88            | 558.84             |
| A_68_P26445378 | chr9:40608813-40608857                            | NM_031165:-521         | Hspa8         | PROMOTER               | 0.425                                                        | 0.415                          | 4533.39            | 1882.56            | 0.177                          | 3146.44            | 555.59             |
| A_68_P26644014 | chr9:75289095-75289140                            | NM_001039522:-213      | Leo1          | PROMOTER               | 0.425                                                        | 0.669                          | 1036.55            | 693.78             | 0.284                          | 843.34             | 239.68             |
| A_68_P25905383 | chr8:63111766-63111810                            | NM_027756:132          | Mfap3l        | INSIDE                 | 0.425                                                        | 0.452                          | 2114.35            | 955.46             | 0.192                          | 1973.04            | 379.33             |
| A_68_P25585441 | chr7:148067881-148067925                          | NM_001127351:-134      | Sirt3         | PROMOTER               | 0.425                                                        | 0.664                          | 2052.05            | 1362.14            | 0.282                          | 1698.79            | 479.75             |
| A_68_P25017007 | chr7:28160302-28160347                            | NM_001199235:19201     | Spnb4         | INSIDE                 | 0.425                                                        | 0.702                          | 1568.81            | 1101.78            | 0.298                          | 1289.57            | 384.55             |
| A_68_P26787851 | chr9:103664317-103664362                          | NM_178638:-172         | Tmem108       | PROMOTER               | 0.425                                                        | 0.641                          | 1147.40            | 735.64             | 0.272                          | 971.25             | 264.61             |
| A_68_P32572889 | chrX:100643328-100643372                          | NR_002844:16495        | Tsix          | INSIDE                 | 0.425                                                        | 3.366                          | 7222.62            | 24314.54           | 1.431                          | 2843.03            | 4068.66            |
| A_68_P25500776 | chr7:133630670-133630714                          | NM_001163713:-176      | Tufm          | PROMOTER               | 0.425                                                        | 0.554                          | 1769.13            | 980.78             | 0.236                          | 1292.11            | 304.30             |
| A_68_P30377738 | chr15:81230455-81230499                           | NM_177310:-141         | Xpnppe3       | DIVERGENT_PROMOTER     | 0.425                                                        | 0.585                          | 3206.19            | 1874.83            | 0.248                          | 2430.25            | 603.33             |

| ProbeName      | Target position of probe on CpG island microarray | TargetID           | GeneSymbol    | CpG island Description | Ratio of relative methylation (TiO <sub>2</sub> -NP/Vehicle) | Sham group                     |                    |                    | TiO <sub>2</sub> -H group      |                    |                    |
|----------------|---------------------------------------------------|--------------------|---------------|------------------------|--------------------------------------------------------------|--------------------------------|--------------------|--------------------|--------------------------------|--------------------|--------------------|
|                |                                                   |                    |               |                        |                                                              | Relative methylation (Cy5/Cy3) | Cy3 signal (Input) | Cy5 signal (MeDIP) | Relative methylation (Cy5/Cy3) | Cy3 signal (Input) | Cy5 signal (MeDIP) |
| A_68_P29750655 | chr14:79700758-79700803                           | NM_025427:662      | 1190002H23Rik | INSIDE                 | 0.424                                                        | 0.631                          | 2121.04            | 1338.95            | 0.267                          | 1624.80            | 434.42             |
| A_68_P26541144 | chr9:57109788-57109832                            | NM_028820:596      | 1700017B05Rik | INSIDE                 | 0.424                                                        | 0.699                          | 1446.44            | 1010.98            | 0.297                          | 1101.96            | 326.77             |
| A_68_P27945543 | chr11:78640074-78640118                           | NM_001076681:0     | 1810012P15Rik | INSIDE                 | 0.424                                                        | 0.513                          | 1366.42            | 701.09             | 0.218                          | 1211.86            | 263.79             |
| A_68_P28182352 | chr11:119960513-119960557                         | NM_001110242:287   | 1810043H04Rik | INSIDE                 | 0.424                                                        | 0.680                          | 1235.58            | 839.70             | 0.288                          | 927.01             | 267.38             |
| A_68_P26018414 | chr8:86671587-86671631                            | NM_145970:44       | Cc2d1a        | INSIDE                 | 0.424                                                        | 0.656                          | 1816.16            | 1190.95            | 0.278                          | 1331.89            | 370.06             |
| A_68_P24590977 | chr6:82982750-82982794                            | NM_010070:693      | Dok1          | INSIDE                 | 0.424                                                        | 0.543                          | 1563.64            | 848.90             | 0.230                          | 1267.91            | 292.10             |
| A_68_P26023052 | chr8:87514587-87514631                            | NM_001167991:115   | Hook2         | INSIDE                 | 0.424                                                        | 0.642                          | 1430.89            | 917.99             | 0.272                          | 1070.13            | 290.93             |
| A_68_P23253009 | chr4:120419330-120419374                          | NM_001081142:429   | Kenq4         | INSIDE                 | 0.424                                                        | 0.701                          | 1634.38            | 1145.29            | 0.297                          | 1213.62            | 360.38             |
| A_68_P28748134 | chr12:113382997-113383048                         | NM_001097621:-1396 | Kif26a        | PROMOTER               | 0.424                                                        | 4.501                          | 10309.02           | 46396.48           | 1.909                          | 6069.03            | 11587.23           |
| A_68_P24758095 | chr6:113143886-113143930                          | NM_177763:1470     | Lhfp14        | INSIDE                 | 0.424                                                        | 0.550                          | 930.66             | 511.41             | 0.233                          | 748.36             | 174.18             |
| A_68_P27495998 | chr10:119664180-119664224                         | NM_025431:87       | Llph          | INSIDE                 | 0.424                                                        | 0.414                          | 1261.65            | 522.47             | 0.176                          | 993.23             | 174.57             |
| A_68_P25373934 | chr7:108653145-108653191                          | NR_026574:53347    | Pdc2a         | INSIDE                 | 0.424                                                        | 0.629                          | 892.80             | 561.63             | 0.267                          | 682.21             | 181.86             |
| A_68_P24126055 | chr5:137943429-137943477                          | NM_028753:205      | Pop7          | INSIDE                 | 0.424                                                        | 0.637                          | 970.48             | 618.59             | 0.270                          | 965.90             | 261.13             |
| A_68_P21748795 | chr2:152158169-152158213                          | NM_001083921:-29   | Rbck1         | PROMOTER               | 0.424                                                        | 0.622                          | 1354.24            | 841.74             | 0.264                          | 1240.43            | 326.89             |
| A_68_P23311883 | chr4:131901216-131901260                          | NM_001197082:427   | Rec1          | INSIDE                 | 0.424                                                        | 0.600                          | 1049.23            | 629.95             | 0.255                          | 818.84             | 208.65             |
| A_68_P25605218 | chr7:151361386-151361430                          | NM_001113373:-16   | Shank2        | PROMOTER               | 0.424                                                        | 0.512                          | 2129.65            | 1090.85            | 0.217                          | 1528.90            | 332.09             |
| A_68_P28096909 | chr11:105451661-105451705                         | NM_181071:383      | Tanc2         | INSIDE                 | 0.424                                                        | 0.670                          | 1636.27            | 1096.28            | 0.284                          | 1449.26            | 411.89             |
| A_68_P30510787 | chr16:4558890-4558934                             | NM_031182:808      | Tefap4        | INSIDE                 | 0.424                                                        | 0.614                          | 7233.98            | 4440.62            | 0.260                          | 4912.91            | 1279.00            |
| A_68_P25947618 | chr8:72178919-72178963                            | NM_001177527:486   | Zfp964        | INSIDE                 | 0.424                                                        | 0.654                          | 853.37             | 558.16             | 0.277                          | 599.49             | 166.07             |
| A_68_P30337385 | chr15:74317945-74317989                           |                    | Unknown       |                        | 0.424                                                        | 0.401                          | 1591.73            | 638.70             | 0.170                          | 1276.67            | 217.40             |
| A_68_P25827280 | chr8:46020590-46020634                            | AK079043:-99       |               | PROMOTER               | 0.424                                                        | 0.592                          | 933.24             | 552.39             | 0.251                          | 682.70             | 171.43             |
| A_68_P29699589 | chr14:70552945-70552991                           | NM_146055:630      | 2610301G19Rik | INSIDE                 | 0.423                                                        | 5.739                          | 4124.45            | 23669.03           | 2.427                          | 2441.32            | 5924.78            |
| A_68_P25962138 | chr8:75094798-75094842                            | NM_172396:127      | 9130011J15Rik | INSIDE                 | 0.423                                                        | 0.533                          | 1353.42            | 721.20             | 0.225                          | 960.95             | 216.45             |
| A_68_P24624508 | chr6:88792125-88792169                            | NM_030251:-217     | Abtb1         | PROMOTER               | 0.423                                                        | 3.214                          | 16049.16           | 51578.49           | 1.361                          | 9621.76            | 13091.91           |
| A_68_P32030084 | chr19:25580234-25580278                           | NM_015826:61       | Dmrt1         | INSIDE                 | 0.423                                                        | 0.495                          | 2646.19            | 1309.16            | 0.210                          | 2197.89            | 460.46             |
| A_68_P23365986 | chr4:141346174-141346218                          | NM_172338:363      | Dnajc16       | INSIDE                 | 0.423                                                        | 0.466                          | 1787.12            | 833.14             | 0.197                          | 1389.82            | 274.01             |
| A_68_P28186834 | chr11:120657869-120657913                         | NM_026824:-181     | Dus11         | PROMOTER               | 0.423                                                        | 0.567                          | 2245.52            | 1272.24            | 0.240                          | 1847.20            | 442.92             |
| A_68_P24660676 | chr6:95067884-95067930                            | NM_001008785:7     | Kbtbd8        | INSIDE                 | 0.423                                                        | 0.501                          | 1384.91            | 693.50             | 0.212                          | 1067.31            | 226.27             |
| A_68_P25088287 | chr7:51847145-51847189                            | NM_008422:911      | Kenc3         | INSIDE                 | 0.423                                                        | 0.462                          | 2111.75            | 976.07             | 0.195                          | 1448.34            | 282.91             |
| A_68_P23916638 | chr5:98614079-98614123                            | NM_029947:4213     | Prdm8         | INSIDE                 | 0.423                                                        | 0.666                          | 938.20             | 624.44             | 0.282                          | 770.31             | 217.06             |
| A_68_P26138376 | chr8:108735052-108735096                          | NM_145404:121      | Prmt7         | INSIDE                 | 0.423                                                        | 0.530                          | 1753.45            | 929.97             | 0.224                          | 1499.64            | 336.49             |
| A_68_P24061239 | chr5:124875960-124876004                          | NM_001081203:-59   | Sbno1         | PROMOTER               | 0.423                                                        | 0.464                          | 2926.54            | 1357.27            | 0.196                          | 2319.38            | 454.59             |
| A_68_P20636517 | chr1:136859020-136859067                          | NM_026024:-110     | Ube2t         | DIVERGENT_PROMOTER     | 0.423                                                        | 0.447                          | 1648.84            | 736.46             | 0.189                          | 1452.07            | 274.19             |
| A_68_P23584758 | chr5:32913772-32913816                            | NM_001205132:251   | Yes1          | INSIDE                 | 0.423                                                        | 0.343                          | 1952.00            | 669.02             | 0.145                          | 1562.07            | 226.56             |
| A_68_P24951777 | chr7:5003100-5003144                              | NM_026900:-11      | Zfp580        | PROMOTER               | 0.423                                                        | 0.626                          | 1500.18            | 938.54             | 0.264                          | 1245.68            | 329.43             |
| A_68_P33008134 | chr12:18521060-18521104                           | NM_001033157:-233  | 5730507C01Rik | PROMOTER               | 0.422                                                        | 0.675                          | 2966.19            | 2001.15            | 0.285                          | 2172.47            | 618.07             |
| A_68_P25958415 | chr8:74225497-74225541                            | NM_028189:181      | B3gnt3        | INSIDE                 | 0.422                                                        | 0.737                          | 2143.45            | 1580.77            | 0.311                          | 1563.69            | 486.64             |
| A_68_P31678448 | chr18:46887631-46887675                           | NM_033037:344      | Cdo1          | INSIDE                 | 0.422                                                        | 0.460                          | 2637.23            | 1212.62            | 0.194                          | 1900.31            | 368.93             |
| A_68_P24347497 | chr6:33010009-33010053                            | NM_025336:122      | Chchd3        | INSIDE                 | 0.422                                                        | 0.536                          | 1123.39            | 602.45             | 0.226                          | 879.35             | 198.89             |
| A_68_P20148457 | chr1:36528751-36528795                            | NM_033570:331      | Cnmn4         | INSIDE                 | 0.422                                                        | 0.482                          | 2547.50            | 1228.37            | 0.203                          | 1966.77            | 399.81             |
| A_68_P31100997 | chr17:25150808-25150852                           | NM_020608:1345     | Cramp11       | INSIDE                 | 0.422                                                        | 0.664                          | 3615.04            | 2399.44            | 0.280                          | 2718.26            | 761.40             |
| A_68_P24467402 | chr6:55067829-55067873                            | NM_009953:15116    | Chr2          | INSIDE                 | 0.422                                                        | 0.608                          | 2457.72            | 1493.45            | 0.257                          | 2070.59            | 531.50             |
| A_68_P26880506 | chr9:120843223-120843267                          | NM_001165902:549   | Cttnb1        | INSIDE                 | 0.422                                                        | 0.512                          | 1548.12            | 792.34             | 0.216                          | 1269.45            | 274.37             |
| A_68_P21762927 | chr2:154718076-154718120                          | NM_026030:544      | Eif2s2        | INSIDE                 | 0.422                                                        | 0.494                          | 1295.85            | 640.47             | 0.209                          | 1049.91            | 219.18             |
| A_68_P25537048 | chr7:140004752-140004796                          | NM_212473:105      | Fam53b        | INSIDE                 | 0.422                                                        | 0.395                          | 1663.24            | 656.80             | 0.167                          | 1453.98            | 242.25             |
| A_68_P21477084 | chr2:102290645-102290689                          | NM_010218:1281     | Fjx1          | INSIDE                 | 0.422                                                        | 0.535                          | 1716.13            | 917.66             | 0.226                          | 1340.04            | 302.63             |
| A_68_P31614303 | chr18:34879926-34879970                           | NM_010280:93       | Gfra3         | INSIDE                 | 0.422                                                        | 0.459                          | 2095.67            | 961.61             | 0.193                          | 1705.92            | 329.96             |
| A_68_P31162040 | chr17:36117126-36117170                           | NM_008136:249      | Gnl1          | INSIDE                 | 0.422                                                        | 0.509                          | 1276.95            | 650.32             | 0.215                          | 977.43             | 210.30             |
| A_68_P30684006 | chr16:38089070-38089114                           | NM_019827:6        | Gsk3b         | INSIDE                 | 0.422                                                        | 0.648                          | 2453.27            | 1589.87            | 0.274                          | 1758.48            | 480.99             |
| A_68_P28043947 | chr11:96205604-96205648                           | NM_010458:544      | Hoxb3         | INSIDE                 | 0.422                                                        | 0.531                          | 2464.90            | 1309.04            | 0.224                          | 1879.09            | 420.76             |
| A_68_P23440918 | chr4:155215643-155215688                          | NM_024263:1877     | Mxra8         | INSIDE                 | 0.422                                                        | 1.415                          | 1342.30            | 1899.36            | 0.597                          | 870.00             | 519.73             |



| ProbeName      | Target position of probe on CpG island microarray | TargetID          | GeneSymbol    | CpG island Description | Ratio of relative methylation (TiO <sub>2</sub> -NP/Vehicle) | Sham group                     |                    |                    | TiO <sub>2</sub> -H group      |                    |                    |
|----------------|---------------------------------------------------|-------------------|---------------|------------------------|--------------------------------------------------------------|--------------------------------|--------------------|--------------------|--------------------------------|--------------------|--------------------|
|                |                                                   |                   |               |                        |                                                              | Relative methylation (Cy5/Cy3) | Cy3 signal (Input) | Cy5 signal (MeDIP) | Relative methylation (Cy5/Cy3) | Cy3 signal (Input) | Cy5 signal (MeDIP) |
| A_68_P21853526 | chr2:170337089-170337133                          | NM_001110152:381  | Pfdn4         | INSIDE                 | 0.422                                                        | 0.689                          | 5002.07            | 3447.40            | 0.291                          | 3516.04            | 1022.07            |
| A_68_P30128575 | chr15:34372745-34372789                           | NM_009083:214     | Rpl30         | INSIDE                 | 0.422                                                        | 0.412                          | 1394.28            | 574.75             | 0.174                          | 1238.70            | 215.54             |
| A_68_P23240175 | chr4:118081682-118081726                          | NM_198170:164     | Szt2          | INSIDE                 | 0.422                                                        | 0.619                          | 2031.40            | 1257.39            | 0.261                          | 1720.99            | 449.84             |
| A_68_P27688949 | chr11:32355960-32356004                           | NM_173784:611     | Ubtid2        | INSIDE                 | 0.422                                                        | 0.650                          | 2519.59            | 1637.60            | 0.274                          | 1965.94            | 539.05             |
| A_68_P21780068 | chr2:157767229-157767273                          | NM_198627:26862   | Vstm21        | INSIDE                 | 0.422                                                        | 0.597                          | 1879.46            | 1122.76            | 0.252                          | 1501.75            | 379.02             |
| A_68_P32300615 | chrX:23270584-23270630                            | NM_175180:364     | Wdr44         | INSIDE                 | 0.422                                                        | 0.627                          | 1040.85            | 652.64             | 0.264                          | 459.39             | 121.46             |
| A_68_P22864042 | chr4:41678377-41678421                            | NM_001017362:-224 | Arid3c        | PROMOTER               | 0.421                                                        | 1.491                          | 3127.52            | 4663.60            | 0.627                          | 2219.77            | 1392.00            |
| A_68_P27445216 | chr10:110182710-110182754                         | NM_178609:212     | E2f7          | INSIDE                 | 0.421                                                        | 0.462                          | 1902.18            | 877.87             | 0.194                          | 1517.45            | 294.85             |
| A_68_P28101900 | chr11:106349136-106349180                         | NM_023913:-48     | Ern1          | PROMOTER               | 0.421                                                        | 0.508                          | 2320.57            | 1179.85            | 0.214                          | 1863.93            | 398.54             |
| A_68_P28221291 | chr12:8304878-8304922                             | NM_013527:3860    | Gd17          | INSIDE                 | 0.421                                                        | 0.586                          | 3303.52            | 1935.60            | 0.247                          | 2268.27            | 559.55             |
| A_68_P22767953 | chr4:19968999-19969043                            | NM_010281:-178    | Ggh           | PROMOTER               | 0.421                                                        | 0.429                          | 1570.69            | 673.59             | 0.181                          | 1388.11            | 250.57             |
| A_68_P32152775 | chr19:47993384-47993428                           | NM_001001738:383  | Itpr1p        | INSIDE                 | 0.421                                                        | 0.671                          | 1366.53            | 916.97             | 0.282                          | 1158.75            | 327.20             |
| A_68_P23573586 | chr5:30924517-30924565                            | NM_010608:33998   | Kenk3         | INSIDE                 | 0.421                                                        | 0.568                          | 1124.37            | 638.72             | 0.239                          | 915.88             | 219.27             |
| A_68_P33003688 | chr1_random:342766-342810                         | NM_177389:125     | Mia3          | INSIDE                 | 0.421                                                        | 0.625                          | 3157.26            | 1973.34            | 0.263                          | 2445.27            | 642.87             |
| A_68_P23985663 | chr5:111847362-111847406                          | NM_001081235:199  | Mn1           | INSIDE                 | 0.421                                                        | 0.575                          | 1005.17            | 578.01             | 0.242                          | 781.17             | 189.07             |
| A_68_P21731904 | chr2:148557983-148558027                          | NM_019632:152     | Napb          | INSIDE                 | 0.421                                                        | 0.604                          | 3761.23            | 2270.02            | 0.254                          | 2478.43            | 630.22             |
| A_68_P26640627 | chr9:74710721-74710765                            | NM_008262:1015    | Onecut1       | INSIDE                 | 0.421                                                        | 0.493                          | 2826.27            | 1394.05            | 0.208                          | 2042.42            | 424.55             |
| A_68_P27542730 | chr10:128133098-128133142                         | NM_177411:204     | Rab5b         | INSIDE                 | 0.421                                                        | 0.635                          | 1145.72            | 728.04             | 0.267                          | 1055.13            | 282.18             |
| A_68_P24755176 | chr6:112646414-112646458                          | NM_001167730:228  | Rad18         | INSIDE                 | 0.421                                                        | 0.605                          | 1133.64            | 685.89             | 0.255                          | 962.43             | 245.03             |
| A_68_P30393146 | chr15:84022703-84022747                           | NM_178614:62      | Samm50        | INSIDE                 | 0.421                                                        | 0.447                          | 1409.97            | 629.72             | 0.188                          | 1155.30            | 217.45             |
| A_68_P26506990 | chr9:50816646-50816690                            | NM_178710:510     | Sik2          | INSIDE                 | 0.421                                                        | 0.666                          | 1460.48            | 972.49             | 0.280                          | 1189.96            | 333.71             |
| A_68_P27181839 | chr10:61158255-61158299                           | NM_027912:15      | Tysnd1        | INSIDE                 | 0.421                                                        | 0.715                          | 1529.10            | 1092.85            | 0.301                          | 1262.60            | 380.16             |
| A_68_P26343012 | chr9:20385783-20385830                            | NM_172919:35      | Zfp846        | INSIDE                 | 0.421                                                        | 0.679                          | 981.98             | 666.79             | 0.286                          | 714.64             | 204.52             |
| A_68_P29478592 | chr14:26426602-26426646                           | NM_183208:147954  | Zmiz1         | INSIDE                 | 0.421                                                        | 0.445                          | 1472.58            | 655.05             | 0.187                          | 1061.12            | 198.80             |
| A_68_P31623418 | chr18:36508869-36508913                           | NM_001081365:613  | 0610010012Rik | INSIDE                 | 0.420                                                        | 0.560                          | 1256.22            | 703.63             | 0.235                          | 1148.09            | 270.04             |
| A_68_P28182351 | chr11:119960438-119960482                         | NM_001110242:213  | 1810043H04Rik | INSIDE                 | 0.420                                                        | 0.433                          | 1670.26            | 723.07             | 0.182                          | 1218.38            | 221.64             |
| A_68_P31918872 | chr19:3708434-3708478                             | NM_028077:124     | 1810055G02Rik | INSIDE                 | 0.420                                                        | 0.582                          | 1229.51            | 715.50             | 0.245                          | 1080.36            | 264.31             |
| A_68_P20429507 | chr1:91350965-91351009                            | NM_001037136:-399 | Agap1         | PROMOTER               | 0.420                                                        | 0.601                          | 947.41             | 568.97             | 0.252                          | 814.03             | 205.32             |
| A_68_P21073310 | chr2:25463379-25463423                            | NM_001024616:566  | B230208H17Rik | INSIDE                 | 0.420                                                        | 0.461                          | 2280.92            | 1051.03            | 0.193                          | 1867.74            | 361.13             |
| A_68_P26168090 | chr8:113917279-113917323                          | NM_178086:421     | Fa2h          | INSIDE                 | 0.420                                                        | 0.691                          | 1285.10            | 888.34             | 0.290                          | 1056.43            | 306.48             |
| A_68_P24175497 | chr5:148537110-148537154                          | NM_010228:432     | Ftl1          | INSIDE                 | 0.420                                                        | 0.617                          | 2038.47            | 1257.73            | 0.259                          | 1729.64            | 447.73             |
| A_68_P31347825 | chr17:74059155-74059199                           | NM_027864:615     | Galnt14       | INSIDE                 | 0.420                                                        | 1.634                          | 7514.33            | 12275.01           | 0.686                          | 4948.64            | 3394.20            |
| A_68_P21906911 | chr2:180629180-180629224                          | NR_029538:458     | Mir124a-3     | DOWNSTREAM             | 0.420                                                        | 0.570                          | 2546.98            | 1450.56            | 0.239                          | 2069.63            | 495.38             |
| A_68_P24126542 | chr5:138041887-138041931                          | NM_030037:360     | Mospd3        | INSIDE                 | 0.420                                                        | 0.710                          | 3325.86            | 2360.03            | 0.298                          | 2661.94            | 794.19             |
| A_68_P21904887 | chr2:180324446-180324490                          | NM_031373:357     | Ogfr          | INSIDE                 | 0.420                                                        | 0.370                          | 1864.70            | 690.24             | 0.155                          | 1417.92            | 220.43             |
| A_68_P23527586 | chr5:21243231-21243275                            | NM_028431:275     | Pmpcb         | INSIDE                 | 0.420                                                        | 0.735                          | 5394.70            | 3965.09            | 0.308                          | 3955.20            | 1219.56            |
| A_68_P22315262 | chr3:88520847-88520891                            | NM_001163310:93   | Rit1          | INSIDE                 | 0.420                                                        | 0.670                          | 1279.17            | 857.61             | 0.281                          | 1095.06            | 308.12             |
| A_68_P31542490 | chr18:21160400-21160444                           | NM_019706:581     | Rnf138        | INSIDE                 | 0.420                                                        | 0.671                          | 2509.27            | 1684.57            | 0.282                          | 2009.07            | 566.87             |
| A_68_P29855886 | chr14:102007246-102007295                         | NM_001081278:1138 | Tbc1d4        | INSIDE                 | 0.420                                                        | 0.592                          | 1030.36            | 609.95             | 0.249                          | 715.80             | 178.15             |
| A_68_P26476239 | chr9:45636484-45636528                            | NM_001081373:215  | Cep164        | INSIDE                 | 0.419                                                        | 0.600                          | 4238.47            | 2542.52            | 0.251                          | 2950.74            | 741.98             |
| A_68_P31666413 | chr18:44540296-44540340                           | NM_027490:165     | Dep2          | INSIDE                 | 0.419                                                        | 0.438                          | 2832.24            | 1241.26            | 0.184                          | 2037.69            | 374.49             |
| A_68_P24620356 | chr6:88148509-88148553                            | NM_008090:-127    | Gata2         | PROMOTER               | 0.419                                                        | 0.469                          | 1442.64            | 676.95             | 0.197                          | 1340.33            | 263.69             |
| A_68_P27390319 | chr10:99478265-99478309                           | NM_013598:-171    | Kitl          | PROMOTER               | 0.419                                                        | 0.515                          | 1992.06            | 1025.00            | 0.215                          | 1728.00            | 372.28             |
| A_68_P21309980 | chr2:69424250-69424294                            | NM_001081088:-148 | Lrp2          | PROMOTER               | 0.419                                                        | 0.613                          | 2816.66            | 1727.82            | 0.257                          | 2322.51            | 574.45             |
| A_68_P30350168 | chr15:76546311-76546355                           | NM_198119:6271    | Lrre24        | INSIDE                 | 0.419                                                        | 0.423                          | 1576.40            | 666.84             | 0.177                          | 1146.32            | 203.17             |
| A_68_P25210773 | chr7:77502893-77502937                            | NM_009697:2565    | Nr2f2         | INSIDE                 | 0.419                                                        | 0.456                          | 1637.13            | 746.81             | 0.191                          | 1360.60            | 260.11             |
| A_68_P24132961 | chr5:139469670-139469719                          | NM_008808:1213    | Pdgfa         | INSIDE                 | 0.419                                                        | 0.450                          | 1236.09            | 555.78             | 0.188                          | 951.74             | 179.09             |
| A_68_P28159660 | chr11:116351347-116351391                         | NM_026364:292     | Prpsap1       | INSIDE                 | 0.419                                                        | 0.654                          | 1739.53            | 1136.92            | 0.274                          | 1497.75            | 409.90             |
| A_68_P31154945 | chr17:34769052-34769096                           | NM_030890:2444    | Prrt1         | INSIDE                 | 0.419                                                        | 0.664                          | 859.65             | 571.17             | 0.279                          | 659.58             | 183.75             |
| A_68_P31065957 | chr17:15635193-15635237                           | NM_011185:26      | Psmb1         | INSIDE                 | 0.419                                                        | 0.610                          | 1107.75            | 675.79             | 0.255                          | 837.69             | 213.89             |
| A_68_P29619513 | chr14:56340877-56340921                           | NM_019519:115     | Rabggtb       | INSIDE                 | 0.419                                                        | 1.425                          | 12228.98           | 17424.16           | 0.597                          | 7695.71            | 4593.86            |

| ProbeName      | Target position of probe on CpG island microarray | TargetID           | GeneSymbol    | CpG island Description | Ratio of relative methylation (TiO <sub>2</sub> -NP/Vehicle) | Sham group                     |                    |                    | TiO <sub>2</sub> -H group      |                    |                    |
|----------------|---------------------------------------------------|--------------------|---------------|------------------------|--------------------------------------------------------------|--------------------------------|--------------------|--------------------|--------------------------------|--------------------|--------------------|
|                |                                                   |                    |               |                        |                                                              | Relative methylation (Cy5/Cy3) | Cy3 signal (Input) | Cy5 signal (MeDIP) | Relative methylation (Cy5/Cy3) | Cy3 signal (Input) | Cy5 signal (MeDIP) |
| A_68_P31166377 | chr17:37079998-37080042                           | NM_001099632:25    | Rnf39         | INSIDE                 | 0.419                                                        | 0.577                          | 2136.79            | 1233.36            | 0.242                          | 1870.24            | 452.19             |
| A_68_P22347940 | chr3:95976314-95976359                            | NM_153053:-136     | Sf3b4         | PROMOTER               | 0.419                                                        | 0.579                          | 1023.64            | 592.25             | 0.242                          | 971.97             | 235.52             |
| A_68_P26924749 | chr10:8238335-8238379                             | NM_177387:267      | Ust           | INSIDE                 | 0.419                                                        | 0.480                          | 2967.43            | 1423.15            | 0.201                          | 2436.12            | 489.69             |
| A_68_P25326410 | chr7:99889553-99889597                            | NR_015510:395      | 4632427E13Rik | INSIDE                 | 0.418                                                        | 0.613                          | 1591.85            | 975.17             | 0.256                          | 1213.29            | 310.51             |
| A_68_P28033281 | chr11:94352708-94352752                           | NM_027984:8558     | Epn3          | INSIDE                 | 0.418                                                        | 0.713                          | 1812.06            | 1292.17            | 0.298                          | 1494.42            | 445.05             |
| A_68_P25507025 | chr7:134889380-134889424                          | NM_172748:-886     | Fbx119        | PROMOTER               | 0.418                                                        | 0.589                          | 3043.86            | 1792.94            | 0.246                          | 1889.60            | 465.46             |
| A_68_P26897303 | chr9:123761167-123761211                          | NM_001110253:-168  | Fyco1         | PROMOTER               | 0.418                                                        | 0.378                          | 2746.02            | 1037.60            | 0.158                          | 2152.23            | 339.85             |
| A_68_P30487410 | chr15:100559585-100559629                         | NM_001161768:-8698 | Galnt6        | PROMOTER               | 0.418                                                        | 0.526                          | 1537.56            | 808.37             | 0.220                          | 1232.61            | 271.10             |
| A_68_P23416918 | chr4:151534429-151534473                          | NM_008236:1475     | Hes2          | INSIDE                 | 0.418                                                        | 0.526                          | 1120.01            | 589.36             | 0.220                          | 990.52             | 218.07             |
| A_68_P27050630 | chr10:32610114-32610158                           | NM_001013411:-415  | Nkain2        | PROMOTER               | 0.418                                                        | 0.558                          | 3230.91            | 1803.75            | 0.233                          | 2528.35            | 589.83             |
| A_68_P32135820 | chr19:45081022-45081066                           | NM_153796:-3       | Peo1          | DIVERGENT_PROMOTER     | 0.418                                                        | 0.651                          | 2097.28            | 1365.42            | 0.272                          | 1519.11            | 413.74             |
| A_68_P30452932 | chr15:94373863-94373910                           | NM_172437:52       | Pus7l         | INSIDE                 | 0.418                                                        | 0.680                          | 997.57             | 678.65             | 0.284                          | 698.60             | 198.48             |
| A_68_P26815242 | chr9:108420124-108420168                          | NM_001114119:729   | Qrich1        | INSIDE                 | 0.418                                                        | 0.543                          | 3343.99            | 1816.39            | 0.227                          | 2647.85            | 600.78             |
| A_68_P25617015 | chr8:4275885-4275929                              | NM_011592:-1       | Timm44        | PROMOTER               | 0.418                                                        | 0.466                          | 1571.46            | 731.62             | 0.194                          | 1206.45            | 234.55             |
| A_68_P22722574 | chr4:9787244-9787288                              | NM_013526:15748    | Gdf6          | INSIDE                 | 0.417                                                        | 0.641                          | 1027.55            | 658.62             | 0.267                          | 864.10             | 230.94             |
| A_68_P24172322 | chr5:148001001-148001045                          | NM_008178:751      | Gsx1          | INSIDE                 | 0.417                                                        | 0.428                          | 1713.77            | 732.81             | 0.178                          | 1429.29            | 255.11             |
| A_68_P27234955 | chr10:70811089-70811133                           | NM_027184:570      | Ipmk          | INSIDE                 | 0.417                                                        | 0.432                          | 2655.26            | 1145.79            | 0.180                          | 1984.07            | 356.94             |
| A_68_P20832395 | chr1:174256553-174256597                          | NM_008429:2820     | Kenj9         | INSIDE                 | 0.417                                                        | 0.587                          | 2183.54            | 1282.71            | 0.245                          | 1782.70            | 436.35             |
| A_68_P21902322 | chr2:179959737-179959781                          | NM_001081171:806   | Lama5         | INSIDE                 | 0.417                                                        | 0.592                          | 1520.26            | 899.44             | 0.246                          | 1245.47            | 306.94             |
| A_68_P29510443 | chr14:32019604-32019648                           | NM_022656:386      | Nisch         | INSIDE                 | 0.417                                                        | 0.679                          | 1573.09            | 1067.41            | 0.283                          | 1272.08            | 360.07             |
| A_68_P28946217 | chr13:36061405-36061450                           | NM_029628:1653     | Ppp1r3g       | INSIDE                 | 0.417                                                        | 0.388                          | 1422.88            | 552.68             | 0.162                          | 1181.97            | 191.50             |
| A_68_P21019039 | chr2:13976814-13976858                            | NM_001012396:826   | Ptpla         | INSIDE                 | 0.417                                                        | 0.459                          | 2459.88            | 1129.22            | 0.192                          | 1945.14            | 372.64             |
| A_68_P27926653 | chr11:75345380-75345424                           | NM_001199283:-211  | Stc43a2       | PROMOTER               | 0.417                                                        | 0.433                          | 3188.26            | 1381.53            | 0.181                          | 2533.47            | 457.61             |
| A_68_P28712491 | chr12:107248439-107248483                         | NM_001029843:-12   | Vrk1          | PROMOTER               | 0.417                                                        | 0.553                          | 1385.42            | 765.60             | 0.230                          | 1094.21            | 251.90             |
| A_68_P24816772 | chr6:124696114-124696158                          | NM_007881:10369    | Atn1          | INSIDE                 | 0.416                                                        | 0.313                          | 1682.71            | 526.81             | 0.130                          | 1384.15            | 180.22             |
| A_68_P31776699 | chr18:64819875-64819919                           | NM_001001488:758   | Atp8b1        | INSIDE                 | 0.416                                                        | 0.645                          | 1010.68            | 651.63             | 0.268                          | 849.92             | 228.17             |
| A_68_P31928284 | chr19:5366667-5366713                             | NM_011793:-45      | Banf1         | DIVERGENT_PROMOTER     | 0.416                                                        | 0.595                          | 996.83             | 592.66             | 0.247                          | 718.76             | 177.78             |
| A_68_P20509929 | chr1:108610390-108610434                          | NM_009741:455      | Bcl2          | INSIDE                 | 0.416                                                        | 0.638                          | 1687.46            | 1076.52            | 0.265                          | 1125.49            | 298.72             |
| A_68_P21617362 | chr2:127951410-127951454                          | NM_009754:-341     | Bcl2l11       | PROMOTER               | 0.416                                                        | 0.608                          | 2537.30            | 1542.87            | 0.253                          | 1871.35            | 473.37             |
| A_68_P21836878 | chr2:167514004-167514048                          | NM_009883:-388     | Cebpb         | PROMOTER               | 0.416                                                        | 0.532                          | 1435.24            | 763.87             | 0.221                          | 1226.46            | 271.50             |
| A_68_P29249639 | chr13:97908050-97908094                           | NM_177266:181      | Gfm2          | INSIDE                 | 0.416                                                        | 0.475                          | 1662.26            | 789.34             | 0.197                          | 1181.89            | 233.24             |
| A_68_P21073109 | chr2:25435334-25435378                            | NM_001005424:263   | Gm996         | INSIDE                 | 0.416                                                        | 0.678                          | 2103.14            | 1425.89            | 0.282                          | 1549.36            | 437.37             |
| A_68_P25837684 | chr8:47825681-47825725                            | NM_008391:604      | Irf2          | INSIDE                 | 0.416                                                        | 0.697                          | 1597.32            | 1112.68            | 0.290                          | 1181.44            | 342.31             |
| A_68_P31929693 | chr19:5610054-5610098                             | NR_037603:-369     | Kat5          | PROMOTER               | 0.416                                                        | 0.475                          | 1492.43            | 709.00             | 0.198                          | 1082.98            | 214.21             |
| A_68_P27922355 | chr11:74584384-74584428                           | NM_026197:42       | Mettl16       | INSIDE                 | 0.416                                                        | 0.584                          | 2413.79            | 1410.45            | 0.243                          | 1906.66            | 463.72             |
| A_68_P23585505 | chr5:33128122-33128166                            | NM_177298:131      | Pisd          | INSIDE                 | 0.416                                                        | 0.458                          | 1904.84            | 871.63             | 0.191                          | 1459.14            | 278.02             |
| A_68_P27568396 | chr11:6315839-6315883                             | NM_008907:-12      | Ppia          | PROMOTER               | 0.416                                                        | 0.551                          | 1712.42            | 943.39             | 0.229                          | 1413.81            | 323.65             |
| A_68_P24043182 | chr5:121654805-121654849                          | NM_011290:317      | Rpl6          | INSIDE                 | 0.416                                                        | 0.525                          | 1530.53            | 802.85             | 0.218                          | 1243.30            | 271.58             |
| A_68_P29145778 | chr13:74487536-74487580                           | NM_023281:130      | Sdha          | INSIDE                 | 0.416                                                        | 0.479                          | 1256.33            | 601.51             | 0.199                          | 969.17             | 193.08             |
| A_68_P25827278 | chr8:46020383-46020427                            | AK079043:109       |               | INSIDE                 | 0.416                                                        | 0.517                          | 1306.82            | 675.22             | 0.215                          | 939.50             | 202.16             |
| A_68_P29020720 | chr13:48764426-48764470                           | NM_007526:6044     | Barx1         | DOWNSTREAM             | 0.415                                                        | 0.533                          | 3856.85            | 2055.47            | 0.221                          | 2861.55            | 632.80             |
| A_68_P27223320 | chr10:68815779-68815823                           | NM_007659:-140     | Cdk1          | PROMOTER               | 0.415                                                        | 0.495                          | 1876.26            | 927.88             | 0.205                          | 1570.55            | 321.96             |
| A_68_P21421467 | chr2:91077045-91077089                            | NM_028119:157      | Ddb2          | INSIDE                 | 0.415                                                        | 0.481                          | 2729.92            | 1314.31            | 0.200                          | 1977.93            | 395.17             |
| A_68_P25151146 | chr7:64764649-64764693                            | NM_176942:709      | Gabra5        | INSIDE                 | 0.415                                                        | 0.485                          | 1209.79            | 586.31             | 0.201                          | 1112.35            | 223.50             |
| A_68_P22325407 | chr3:90269682-90269726                            | NM_008727:84       | Npr1          | INSIDE                 | 0.415                                                        | 0.463                          | 2335.39            | 1081.29            | 0.192                          | 1864.58            | 358.54             |
| A_68_P31161346 | chr17:35998590-35998640                           | NM_134122:352      | Nrm           | INSIDE                 | 0.415                                                        | 1.623                          | 3958.59            | 6423.63            | 0.673                          | 2470.63            | 1663.50            |
| A_68_P28055835 | chr11:98210174-98210218                           | NM_144828:145      | Ppp1r1b       | INSIDE                 | 0.415                                                        | 0.626                          | 3132.75            | 1960.48            | 0.260                          | 2366.43            | 614.59             |
| A_68_P28145824 | chr11:113926254-113926298                         | NM_172800:989      | Sdk2          | INSIDE                 | 0.415                                                        | 0.423                          | 2654.77            | 1123.94            | 0.176                          | 1979.25            | 347.60             |
| A_68_P23756359 | chr5:65827367-65827411                            | NM_009466:-307     | Ugdh          | PROMOTER               | 0.415                                                        | 0.455                          | 1287.76            | 586.48             | 0.189                          | 1071.15            | 202.44             |
| A_68_P29433273 | chr14:18005233-18005277                           |                    |               | Unknown                | 0.415                                                        | 0.554                          | 1350.69            | 748.90             | 0.230                          | 1047.01            | 241.07             |
| A_68_P33012181 | chr9_random:57403-57447                           | NR_027950:2732     | 493052615Rik  | DOWNSTREAM             | 0.414                                                        | 0.557                          | 1497.55            | 834.42             | 0.231                          | 1276.19            | 294.67             |

| ProbeName      | Target position of probe on CpG island microarray | TargetID                 | GeneSymbol    | CpG island Description | Ratio of relative methylation (TiO <sub>2</sub> -NP/Vehicle) | Sham group                     |                    |                    | TiO <sub>2</sub> -H group      |                    |                    |
|----------------|---------------------------------------------------|--------------------------|---------------|------------------------|--------------------------------------------------------------|--------------------------------|--------------------|--------------------|--------------------------------|--------------------|--------------------|
|                |                                                   |                          |               |                        |                                                              | Relative methylation (Cy5/Cy3) | Cy3 signal (Input) | Cy5 signal (MeDIP) | Relative methylation (Cy5/Cy3) | Cy3 signal (Input) | Cy5 signal (MeDIP) |
| A_68_P25276880 | chr7:89484688-89484732                            | NM_001190374:507         | Adamts13      | INSIDE                 | 0.414                                                        | 0.612                          | 2844.93            | 1740.42            | 0.253                          | 2171.37            | 549.74             |
| A_68_P28430601 | chr12:52695077-52695121                           | NM_001198835:771         | Coch          | INSIDE                 | 0.414                                                        | 0.570                          | 1734.46            | 988.83             | 0.236                          | 1303.88            | 307.67             |
| A_68_P25952213 | chr8:73017547-73017591                            | NM_018827:514            | Crtfl         | INSIDE                 | 0.414                                                        | 0.663                          | 1178.42            | 780.87             | 0.274                          | 916.86             | 251.36             |
| A_68_P23574103 | chr5:31013991-31014035                            | NM_023047:-255           | Dpysl5        | PROMOTER               | 0.414                                                        | 0.710                          | 1574.89            | 1118.13            | 0.294                          | 1444.85            | 336.89             |
| A_68_P22729550 | chr4:11314133-11314177                            | NM_194055:-224           | Esrp1         | PROMOTER               | 0.414                                                        | 0.637                          | 3420.97            | 2180.31            | 0.264                          | 2777.70            | 733.15             |
| A_68_P24844081 | chr6:129483283-129483327                          | NM_020590:95             | Gabarapl1     | INSIDE                 | 0.414                                                        | 0.481                          | 1103.95            | 530.78             | 0.199                          | 834.82             | 165.97             |
| A_68_P21046072 | chr2:19579131-19579175                            | NR_033642:372            | Gm3230        | INSIDE                 | 0.414                                                        | 0.580                          | 1816.74            | 1053.00            | 0.240                          | 1498.43            | 359.31             |
| A_68_P28888885 | chr13:24853671-24853715                           | NM_020567:114            | Gmn           | INSIDE                 | 0.414                                                        | 0.546                          | 1466.72            | 800.57             | 0.226                          | 1159.39            | 261.93             |
| A_68_P29223483 | chr13:93125415-93125459                           | NM_010829:-478           | Msh3          | PROMOTER               | 0.414                                                        | 0.660                          | 1694.35            | 1118.52            | 0.273                          | 1384.23            | 377.98             |
| A_68_P22029225 | chr3:30501383-30501427                            | NM_030557:396            | Mynn          | INSIDE                 | 0.414                                                        | 0.425                          | 1483.23            | 631.03             | 0.176                          | 1178.90            | 207.57             |
| A_68_P23373719 | chr4:142751586-142751630                          | NM_001081355:51004       | Prdm2         | INSIDE                 | 0.414                                                        | 0.600                          | 2265.89            | 1359.50            | 0.248                          | 1795.27            | 445.77             |
| A_68_P26346146 | chr9:21049162-21049206                            | NM_053190:3703           | S1pr5         | INSIDE                 | 0.414                                                        | 0.484                          | 1981.32            | 959.66             | 0.200                          | 1636.69            | 327.93             |
| A_68_P31254157 | chr17:56281353-56281397                           | NM_001130456:-1608       | Sema6b        | PROMOTER               | 0.414                                                        | 0.648                          | 3569.53            | 2312.29            | 0.268                          | 2533.73            | 678.80             |
| A_68_P32464768 | chrX:71032322-71032366                            | NM_001166480:-22         | Ssr4          | DIVERGENT_PROMOTER     | 0.414                                                        | 1.428                          | 2322.49            | 3316.10            | 0.591                          | 898.89             | 531.58             |
| A_68_P23196100 | chr4:108133295-108133339                          | NM_175472:1286           | Zcche11       | INSIDE                 | 0.414                                                        | 0.646                          | 1484.72            | 958.90             | 0.267                          | 1125.04            | 300.94             |
| A_68_P25027721 | chr7:30303289-30303333                            | ENSMUST00000141713:-913  |               | PROMOTER               | 0.414                                                        | 0.420                          | 1880.81            | 789.64             | 0.174                          | 1529.55            | 265.75             |
| A_68_P28463393 | chr12:58677002-58677046                           | NM_001037743:11923       | 4921506M07Rik | INSIDE                 | 0.413                                                        | 0.680                          | 1762.12            | 1197.90            | 0.281                          | 1675.53            | 470.49             |
| A_68_P22831249 | chr4:34498566-34498610                            | NM_001007589:725         | Akirin2       | INSIDE                 | 0.413                                                        | 0.604                          | 2742.82            | 1656.91            | 0.250                          | 2173.52            | 542.87             |
| A_68_P27539540 | chr10:127534403-127534447                         | NM_054078:4586           | Baz2a         | INSIDE                 | 0.413                                                        | 0.431                          | 2288.05            | 985.78             | 0.178                          | 2055.08            | 365.44             |
| A_68_P25565211 | chr7:144506656-144506609                          | NM_001113414:-458        | Ebf3          | PROMOTER               | 0.413                                                        | 0.566                          | 1305.03            | 738.81             | 0.234                          | 1040.78            | 243.47             |
| A_68_P31157364 | chr17:35202217-35202261                           | NR_001462:857            | G6b           | INSIDE                 | 0.413                                                        | 0.552                          | 2616.09            | 1444.87            | 0.228                          | 1893.95            | 432.00             |
| A_68_P30925869 | chr16:84835358-84835402                           | NM_008065:12             | Gabpa         | INSIDE                 | 0.413                                                        | 0.551                          | 1057.97            | 583.26             | 0.228                          | 789.20             | 179.70             |
| A_68_P25715748 | chr8:24367539-24367583                            | NM_001042484:-8          | Golga7        | PROMOTER               | 0.413                                                        | 0.613                          | 2389.75            | 1464.08            | 0.253                          | 1668.08            | 421.69             |
| A_68_P27767868 | chr11:46250398-46250442                           | NM_001104530:-28         | Med7          | PROMOTER               | 0.413                                                        | 0.663                          | 990.79             | 656.77             | 0.274                          | 789.79             | 216.19             |
| A_68_P30232953 | chr15:55388796-55388840                           | NM_026759:49             | Mrp13         | INSIDE                 | 0.413                                                        | 0.473                          | 2660.21            | 1257.09            | 0.195                          | 2051.67            | 400.62             |
| A_68_P29263987 | chr13:100285787-100285831                         | NM_008634:749            | Mtap1b        | INSIDE                 | 0.413                                                        | 0.593                          | 1126.62            | 667.52             | 0.245                          | 890.06             | 217.62             |
| A_68_P29055175 | chr13:55566226-55566270                           | NM_001030296:621         | Prr7          | INSIDE                 | 0.413                                                        | 0.641                          | 997.70             | 639.06             | 0.265                          | 859.80             | 227.64             |
| A_68_P25528063 | chr7:138515003-138515047                          | NM_001039534:365         | Pstk          | INSIDE                 | 0.413                                                        | 0.557                          | 1266.05            | 704.56             | 0.230                          | 941.94             | 216.26             |
| A_68_P30595257 | chr16:21947236-21947280                           | NM_025693:367            | Tmem41a       | INSIDE                 | 0.413                                                        | 0.705                          | 1335.69            | 942.24             | 0.291                          | 1141.59            | 332.69             |
| A_68_P27636579 | chr11:21270946-21270990                           | NM_139297:-86            | Ugp2          | PROMOTER               | 0.413                                                        | 0.627                          | 3347.53            | 2100.29            | 0.259                          | 2781.75            | 720.34             |
| A_68_P29449769 | chr14:21748618-21748662                           | NM_009502:-14            | Vcl           | PROMOTER               | 0.413                                                        | 0.610                          | 3674.94            | 2241.40            | 0.252                          | 2828.59            | 712.86             |
| A_68_P27992047 | chr11:86806779-86806823                           | NM_001005341:464         | Ypel2         | INSIDE                 | 0.413                                                        | 0.672                          | 4891.83            | 3288.84            | 0.278                          | 3710.47            | 1030.84            |
| A_68_P27111549 | chr10:45206690-45206739                           | ENSMUST00000099849:-513  |               | PROMOTER               | 0.413                                                        | 0.474                          | 1095.19            | 518.63             | 0.196                          | 885.32             | 173.24             |
| A_68_P23971472 | chr5:108796224-108796268                          | ENSMUST00000100944:-2630 |               | PROMOTER               | 0.413                                                        | 0.564                          | 1652.80            | 932.82             | 0.233                          | 1237.91            | 288.34             |
| A_68_P27970642 | chr11:83116490-83116534                           | NM_001035854:314         | Ap2b1         | INSIDE                 | 0.412                                                        | 0.613                          | 1542.09            | 945.94             | 0.253                          | 1146.43            | 289.90             |
| A_68_P25609691 | chr7:152047946-152047990                          | NM_010202:678            | Fgf4          | INSIDE                 | 0.412                                                        | 0.492                          | 1642.75            | 808.69             | 0.203                          | 1186.41            | 240.81             |
| A_68_P23018911 | chr4:73659893-73659937                            | NM_172869:408            | Frmf3         | INSIDE                 | 0.412                                                        | 0.571                          | 1375.71            | 786.02             | 0.235                          | 1140.99            | 268.36             |
| A_68_P32135887 | chr19:45090142-45090186                           | NM_001130526:-2460       | Lzts2         | PROMOTER               | 0.412                                                        | 0.691                          | 1347.91            | 930.96             | 0.285                          | 1100.25            | 313.42             |
| A_68_P28192098 | chr11:121563706-121563750                         | NM_144797:-12            | Metrn1        | PROMOTER               | 0.412                                                        | 0.530                          | 1369.10            | 725.65             | 0.218                          | 1193.02            | 260.61             |
| A_68_P25725384 | chr8:26212812-26212856                            | NM_031257:-551           | Plekha2       | PROMOTER               | 0.412                                                        | 0.703                          | 3332.86            | 2343.63            | 0.290                          | 2682.89            | 776.75             |
| A_68_P31120663 | chr17:28278567-28278611                           | NM_001004366:-882        | Scube3        | PROMOTER               | 0.412                                                        | 0.452                          | 1146.06            | 518.47             | 0.187                          | 957.24             | 178.55             |
| A_68_P30349611 | chr15:76470372-76470416                           | NM_183091:-35            | Tonsl         | PROMOTER               | 0.412                                                        | 1.668                          | 9193.56            | 15333.36           | 0.687                          | 5983.93            | 4113.26            |
| A_68_P20636519 | chr1:136859233-136859277                          | NM_026024:101            | Ube2t         | INSIDE                 | 0.412                                                        | 0.519                          | 1782.14            | 924.96             | 0.214                          | 1524.67            | 325.64             |
| A_68_P20976549 | chr2:5872087-5872131                              | NM_001081132:-406        | Upf2          | DIVERGENT_PROMOTER     | 0.412                                                        | 0.537                          | 2244.35            | 1204.12            | 0.221                          | 1687.54            | 373.12             |
| A_68_P22319094 | chr3:89195751-89195795                            | NM_009565:1353           | Zbtb7b        | INSIDE                 | 0.412                                                        | 0.477                          | 1482.92            | 707.26             | 0.196                          | 1153.77            | 226.49             |
| A_68_P30546660 | chr16:11176366-11176410                           | NM_145931:98             | Zc3h7a        | INSIDE                 | 0.412                                                        | 0.489                          | 1495.01            | 730.64             | 0.201                          | 1359.83            | 273.69             |
| A_68_P27846110 | chr11:60836644-60836688                           | ENSMUST00000089184:601   |               | INSIDE                 | 0.412                                                        | 0.609                          | 938.36             | 571.87             | 0.251                          | 789.61             | 198.33             |
| A_68_P27255933 | chr10:74780494-74780538                           | NM_009630:829            | Adora2a       | INSIDE                 | 0.411                                                        | 1.363                          | 5453.48            | 7433.18            | 0.561                          | 3819.41            | 2141.52            |
| A_68_P26318243 | chr9:14419424-14419468                            | NM_001081395:-2          | Amot1         | PROMOTER               | 0.411                                                        | 0.602                          | 873.40             | 525.70             | 0.247                          | 753.40             | 186.27             |
| A_68_P21094157 | chr2:28773265-28773309                            | NM_001164186:-1326       | Barhl1        | PROMOTER               | 0.411                                                        | 0.696                          | 2445.75            | 1702.23            | 0.286                          | 1840.68            | 527.06             |
| A_68_P25044994 | chr7:35460266-35460310                            | NM_175140:137442         | Chst8         | INSIDE                 | 0.411                                                        | 0.599                          | 1228.10            | 735.14             | 0.246                          | 994.25             | 244.50             |

| ProbeName      | Target position of probe on CpG island microarray | TargetID                | GeneSymbol    | CpG island Description | Ratio of relative methylation (TiO <sub>2</sub> -NP/Vehicle) | Sham group                     |                    |                    | TiO <sub>2</sub> -H group      |                    |                    |
|----------------|---------------------------------------------------|-------------------------|---------------|------------------------|--------------------------------------------------------------|--------------------------------|--------------------|--------------------|--------------------------------|--------------------|--------------------|
|                |                                                   |                         |               |                        |                                                              | Relative methylation (Cy5/Cy3) | Cy3 signal (Input) | Cy5 signal (MeDIP) | Relative methylation (Cy5/Cy3) | Cy3 signal (Input) | Cy5 signal (MeDIP) |
| A_68_P29506064 | chr14:31293149-31293193                           | NM_133761:420           | Dep1a         | INSIDE                 | 0.411                                                        | 0.548                          | 1594.27            | 873.20             | 0.225                          | 1172.68            | 263.71             |
| A_68_P28069093 | chr11:100480802-100480846                         | NM_019795:658           | Dnajc7        | INSIDE                 | 0.411                                                        | 0.700                          | 1858.85            | 1301.35            | 0.288                          | 1302.63            | 375.00             |
| A_68_P21428049 | chr2:92210891-92210935                            | NM_001166633:281        | Gylt11b       | INSIDE                 | 0.411                                                        | 0.603                          | 2316.06            | 1395.78            | 0.247                          | 1656.29            | 409.93             |
| A_68_P24942331 | chr6:148779822-148779866                          | NM_001081113:145        | Ipo8          | INSIDE                 | 0.411                                                        | 0.555                          | 1755.36            | 974.80             | 0.228                          | 1369.02            | 312.29             |
| A_68_P26585376 | chr9:64868976-64869020                            | NM_021345:526           | Ptplad1       | INSIDE                 | 0.411                                                        | 0.593                          | 1041.52            | 618.04             | 0.244                          | 901.82             | 220.16             |
| A_68_P25032745 | chr7:31435198-31435242                            | NM_133693:27            | Rbm42         | INSIDE                 | 0.411                                                        | 0.643                          | 1186.15            | 762.97             | 0.264                          | 930.76             | 246.05             |
| A_68_P26822087 | chr9:110034313-110034357                          | NM_009211:-193          | Smarcc1       | PROMOTER               | 0.411                                                        | 0.545                          | 978.56             | 533.48             | 0.224                          | 789.66             | 176.88             |
| A_68_P30572948 | chr16:17277681-17277725                           | NM_177473:1310          | Tmem191c      | INSIDE                 | 0.411                                                        | 0.419                          | 1794.88            | 752.09             | 0.172                          | 1424.21            | 245.03             |
| A_68_P26596713 | chr9:66891367-66891411                            | NM_001164252:290        | Tpm1          | INSIDE                 | 0.411                                                        | 0.633                          | 1916.73            | 1214.25            | 0.260                          | 1718.65            | 447.69             |
| A_68_P24003597 | chr5:114830959-114831004                          | NM_054093:366           | Ubc3b         | INSIDE                 | 0.411                                                        | 0.529                          | 4098.81            | 2167.91            | 0.218                          | 3145.46            | 684.31             |
| A_68_P31637164 | chr18:39152519-39152563                           | NM_175164:-258          | Arhgap26      | PROMOTER               | 0.410                                                        | 0.725                          | 1703.48            | 1234.31            | 0.297                          | 1219.68            | 361.91             |
| A_68_P23201931 | chr4:109330348-109330392                          | NM_007671:7607          | Cdkn2c        | DOWNSTREAM             | 0.410                                                        | 0.428                          | 2457.97            | 1053.23            | 0.176                          | 2044.63            | 359.05             |
| A_68_P26137946 | chr8:108660718-108660762                          | NM_176838:134           | Esrp2         | INSIDE                 | 0.410                                                        | 0.672                          | 6302.10            | 4233.59            | 0.275                          | 4092.88            | 1126.41            |
| A_68_P31098857 | chr17:24987665-24987709                           | NM_001159626:75         | Hagh          | INSIDE                 | 0.410                                                        | 0.628                          | 1229.78            | 771.74             | 0.257                          | 1042.21            | 268.16             |
| A_68_P27924564 | chr11:74979683-74979728                           | NM_001098203:1949       | Hic1          | INSIDE                 | 0.410                                                        | 0.384                          | 1585.65            | 608.64             | 0.157                          | 1227.08            | 193.10             |
| A_68_P29154205 | chr13:76522219-76522263                           | NM_030174:-168          | Meip1         | PROMOTER               | 0.410                                                        | 0.580                          | 1388.94            | 805.24             | 0.237                          | 1088.20            | 258.36             |
| A_68_P20221656 | chr1:51535340-51535384                            | NM_028696:-119          | Obfc2a        | PROMOTER               | 0.410                                                        | 0.578                          | 4764.54            | 2752.21            | 0.237                          | 3808.61            | 902.69             |
| A_68_P25957670 | chr8:74115606-74115650                            | NM_025396:-454          | Pgls          | PROMOTER               | 0.410                                                        | 0.602                          | 4980.29            | 3000.61            | 0.247                          | 3676.46            | 907.74             |
| A_68_P28071134 | chr11:100820206-100820250                         | NM_008986:11703         | Ptf           | INSIDE                 | 0.410                                                        | 0.593                          | 2523.39            | 1495.35            | 0.243                          | 1817.82            | 441.98             |
| A_68_P20348987 | chr1:74553038-74553082                            | NM_021383:427           | Rqcd1         | INSIDE                 | 0.410                                                        | 0.622                          | 1929.98            | 1200.79            | 0.255                          | 1468.88            | 374.64             |
| A_68_P28168289 | chr11:117830449-117830493                         | NM_007707:210           | Soes3         | INSIDE                 | 0.410                                                        | 0.498                          | 1705.64            | 849.37             | 0.204                          | 1381.55            | 281.93             |
| A_68_P27682712 | chr11:31269004-31269048                           | NM_011491:1035          | Ste2          | INSIDE                 | 0.410                                                        | 0.590                          | 897.61             | 529.27             | 0.242                          | 837.64             | 202.36             |
| A_68_P21912033 | chr2:181415118-181415162                          | NM_009326:126           | Tcea2         | INSIDE                 | 0.410                                                        | 0.504                          | 1224.04            | 616.75             | 0.206                          | 930.26             | 192.01             |
| A_68_P25018704 | chr7:28516297-28516346                            | NM_009560:-106          | Zfp60         | PROMOTER               | 0.410                                                        | 0.489                          | 1102.47            | 539.29             | 0.201                          | 827.88             | 166.06             |
| A_68_P21823447 | chr2:165194226-165194272                          | NM_001005425:-6629      | Zfp663        | PROMOTER               | 0.410                                                        | 0.586                          | 1286.83            | 753.90             | 0.240                          | 937.90             | 225.02             |
| A_68_P24465594 | chr6:54766604-54766648                            | NM_199143:-283          | Znrf2         | PROMOTER               | 0.410                                                        | 0.537                          | 1840.31            | 987.56             | 0.220                          | 1516.27            | 333.72             |
| A_68_P24430832 | chr6:49024262-49024309                            | NM_029353:492           | 2410003K15Rik | INSIDE                 | 0.409                                                        | 0.678                          | 1040.49            | 705.25             | 0.277                          | 822.87             | 228.27             |
| A_68_P22834883 | chr4:35172926-35172970                            | NM_001081343:181        | 3110043O21Rik | INSIDE                 | 0.409                                                        | 0.669                          | 955.75             | 639.50             | 0.274                          | 791.03             | 216.49             |
| A_68_P23442482 | chr4:155484180-155484224                          | NM_145557:96            | 9430015G10Rik | INSIDE                 | 0.409                                                        | 0.431                          | 1382.21            | 595.85             | 0.176                          | 1104.16            | 194.66             |
| A_68_P24046036 | chr5:122161287-122161331                          | NM_009125:-309          | Atxn2         | PROMOTER               | 0.409                                                        | 0.670                          | 2342.01            | 1570.29            | 0.274                          | 1840.76            | 505.08             |
| A_68_P20849637 | chr1:177622396-177622440                          | NM_021350:-3934         | Chml          | PROMOTER               | 0.409                                                        | 0.736                          | 3272.00            | 2406.68            | 0.301                          | 2326.69            | 699.39             |
| A_68_P28566344 | chr12:79963184-79963228                           | NM_026114:148           | Eif2s1        | INSIDE                 | 0.409                                                        | 0.487                          | 1532.72            | 745.90             | 0.199                          | 1213.84            | 241.38             |
| A_68_P31948452 | chr19:10176316-10176360                           | NM_019699:-345          | Fads2         | PROMOTER               | 0.409                                                        | 0.572                          | 1284.29            | 734.28             | 0.234                          | 1045.44            | 244.33             |
| A_68_P20802626 | chr1:168930754-168930798                          | NM_001160261:-771       | Fam78b        | DIVERGENT_PROMOTER     | 0.409                                                        | 0.544                          | 4120.83            | 2241.58            | 0.223                          | 3702.58            | 824.57             |
| A_68_P23226466 | chr4:115563188-115563232                          | NM_001039124:6206       | Kncn          | DOWNSTREAM             | 0.409                                                        | 0.556                          | 1854.46            | 1030.70            | 0.227                          | 1582.06            | 359.35             |
| A_68_P31775847 | chr18:64676070-64676114                           | NM_001142950:119        | Nars          | INSIDE                 | 0.409                                                        | 0.572                          | 2345.12            | 1342.55            | 0.234                          | 1852.25            | 434.23             |
| A_68_P31626274 | chr18:37107885-37107929                           | NM_007766:-4436         | Pcdha4        | PROMOTER               | 0.409                                                        | 1.496                          | 948.35             | 1419.04            | 0.612                          | 808.66             | 495.14             |
| A_68_P31921667 | chr19:4192216-4192260                             | NM_031868:65            | Ppp1ca        | INSIDE                 | 0.409                                                        | 0.625                          | 2319.46            | 1450.06            | 0.256                          | 1886.44            | 482.61             |
| A_68_P33012162 | chr9_random:55248-55292                           | NM_011154:-238          | Ppp2r3d       | PROMOTER               | 0.409                                                        | 0.688                          | 1410.70            | 970.21             | 0.282                          | 1027.25            | 289.29             |
| A_68_P26609891 | chr9:69138894-69138938                            | NM_013646:637308        | Rora          | INSIDE                 | 0.409                                                        | 0.527                          | 2100.37            | 1107.77            | 0.215                          | 1636.20            | 352.54             |
| A_68_P25434394 | chr7:121261406-121261450                          | NM_025846:-133          | Rras2         | PROMOTER               | 0.409                                                        | 0.699                          | 1787.85            | 1250.07            | 0.286                          | 1426.98            | 408.44             |
| A_68_P22917597 | chr4:52452103-52452147                            | NM_008017:4             | Smc2          | INSIDE                 | 0.409                                                        | 0.450                          | 1247.91            | 561.74             | 0.184                          | 1050.69            | 193.22             |
| A_68_P21070649 | chr2:25080027-25080071                            | NM_146116:174           | Tubb2c        | INSIDE                 | 0.409                                                        | 0.478                          | 1412.01            | 675.35             | 0.196                          | 1110.29            | 217.23             |
| A_68_P21070652 | chr2:25080248-25080292                            | NM_146116:-50           | Tubb2c        | PROMOTER               | 0.409                                                        | 0.423                          | 1560.81            | 659.82             | 0.173                          | 1088.84            | 188.17             |
| A_68_P21070645 | chr2:25079554-25079599                            | NM_146116:646           | Tubb2c        | INSIDE                 | 0.409                                                        | 0.491                          | 1200.14            | 589.19             | 0.201                          | 968.76             | 194.37             |
| A_68_P28553596 | chr12:77471058-77471102                           | NM_178744:-172          | Zbtb1         | DIVERGENT_PROMOTER     | 0.409                                                        | 0.552                          | 2284.85            | 1261.68            | 0.226                          | 1750.16            | 395.07             |
| A_68_P24973875 | chr7:13551224-13551268                            | NM_178732:34            | Zfp324        | INSIDE                 | 0.409                                                        | 0.515                          | 1331.45            | 685.54             | 0.210                          | 1045.44            | 219.91             |
| A_68_P31620880 | chr18:36078887-36078931                           | AK021191:6123           |               | DOWNSTREAM             | 0.409                                                        | 0.618                          | 2034.91            | 1258.42            | 0.253                          | 1709.12            | 432.34             |
| A_68_P21710705 | chr2:144993065-144993109                          | ENSMUST00000110007:-403 |               | PROMOTER               | 0.409                                                        | 0.630                          | 1657.26            | 1043.44            | 0.258                          | 1328.30            | 342.45             |
| A_68_P30560720 | chr16:14159038-14159083                           | NM_001081154:307        | 4921513D23Rik | INSIDE                 | 0.408                                                        | 0.497                          | 2073.99            | 1031.49            | 0.203                          | 1636.44            | 332.16             |
| A_68_P31953831 | chr19:11023233-11023277                           | NM_023731:502           | Ccdc86        | INSIDE                 | 0.408                                                        | 0.643                          | 889.16             | 571.31             | 0.262                          | 716.46             | 187.98             |

| ProbeName      | Target position of probe on CpG island microarray | TargetID                | GeneSymbol    | CpG island Description | Ratio of relative methylation (TiO <sub>2</sub> -NP/Vehicle) | Sham group                     |                    |                    | TiO <sub>2</sub> -H group      |                    |                    |
|----------------|---------------------------------------------------|-------------------------|---------------|------------------------|--------------------------------------------------------------|--------------------------------|--------------------|--------------------|--------------------------------|--------------------|--------------------|
|                |                                                   |                         |               |                        |                                                              | Relative methylation (Cy5/Cy3) | Cy3 signal (Input) | Cy5 signal (MeDIP) | Relative methylation (Cy5/Cy3) | Cy3 signal (Input) | Cy5 signal (MeDIP) |
| A_68_P25501143 | chr7:133709945-133709993                          | NM_146200-88            | Eif3e         | PROMOTER               | 0.408                                                        | 0.609                          | 935.98             | 570.37             | 0.248                          | 786.54             | 195.38             |
| A_68_P25949228 | chr8:72520400-72520444                            | NM_001113345-144        | Gatad2a       | PROMOTER               | 0.408                                                        | 0.489                          | 2940.06            | 1438.94            | 0.200                          | 2316.97            | 463.12             |
| A_68_P22194396 | chr3:63780003-63780047                            | NM_001033300-40         | Gmps          | PROMOTER               | 0.408                                                        | 0.683                          | 1296.60            | 885.44             | 0.279                          | 1021.69            | 284.75             |
| A_68_P23541182 | chr5:23857019-23857063                            | NM_013569-382           | Kenh2         | INSIDE                 | 0.408                                                        | 0.563                          | 1148.64            | 647.18             | 0.230                          | 931.66             | 214.28             |
| A_68_P24112795 | chr5:135164074-135164118                          | NM_010717-364           | Limk1         | INSIDE                 | 0.408                                                        | 0.682                          | 5503.00            | 3753.40            | 0.279                          | 3918.82            | 1091.53            |
| A_68_P22818617 | chr4:32050724-32050768                            | NM_009316-335           | Map3k7        | PROMOTER               | 0.408                                                        | 0.377                          | 1924.93            | 726.34             | 0.154                          | 1466.92            | 225.63             |
| A_68_P27293629 | chr10:82226162-82226206                           | NM_010914-702           | Nfyb          | INSIDE                 | 0.408                                                        | 0.567                          | 1982.74            | 1125.03            | 0.232                          | 1672.39            | 387.54             |
| A_68_P25373532 | chr7:108599866-108599910                          | NR_026574-67            | Pdc2a         | INSIDE                 | 0.408                                                        | 0.510                          | 2866.26            | 1461.57            | 0.208                          | 2125.20            | 441.78             |
| A_68_P28107255 | chr11:107331346-107331390                         | NM_145823-666           | Pitpnc1       | INSIDE                 | 0.408                                                        | 0.658                          | 1864.59            | 1226.24            | 0.268                          | 1561.88            | 419.27             |
| A_68_P31940077 | chr19:7557297-7557341                             | NM_053076-453           | Rtn3          | INSIDE                 | 0.408                                                        | 1.623                          | 3523.70            | 5720.20            | 0.662                          | 2531.91            | 1675.36            |
| A_68_P21775423 | chr2:156960457-156960501                          | NM_001139520-480        | Samhd1        | INSIDE                 | 0.408                                                        | 0.568                          | 1117.04            | 634.74             | 0.232                          | 1007.64            | 233.45             |
| A_68_P24819294 | chr6:125141350-125141400                          | NR_028517-4925          | Scarna10      | PROMOTER               | 0.408                                                        | 0.615                          | 1712.69            | 1053.88            | 0.251                          | 1327.18            | 332.98             |
| A_68_P30580553 | chr16:18581703-18581747                           | NM_011532-5338          | Tbx1          | DOWNSTREAM             | 0.408                                                        | 0.656                          | 1584.96            | 1040.01            | 0.267                          | 1296.88            | 346.80             |
| A_68_P22728296 | chr4:11083878-11083922                            | NM_001199105-313        | Trp53inp1     | INSIDE                 | 0.408                                                        | 0.443                          | 2227.67            | 986.41             | 0.181                          | 1725.74            | 311.95             |
| A_68_P21567191 | chr2:118798466-118798510                          | AK184532-45580          |               | INSIDE                 | 0.408                                                        | 0.507                          | 2052.06            | 1040.89            | 0.207                          | 1598.99            | 330.85             |
| A_68_P23747544 | chr7:64203539-64203583                            | NM_029554-173           | 0610040J01Rik | PROMOTER               | 0.407                                                        | 0.325                          | 2198.01            | 714.47             | 0.132                          | 1814.50            | 239.97             |
| A_68_P26313777 | chr9:13631232-13631276                            | NR_037622-243           | Cep57         | INSIDE                 | 0.407                                                        | 0.486                          | 3391.82            | 1647.72            | 0.198                          | 2734.82            | 540.70             |
| A_68_P27284381 | chr10:80085791-80085835                           | NM_001159591-6588       | Cank1g2       | PROMOTER               | 0.407                                                        | 0.460                          | 2111.74            | 970.58             | 0.187                          | 1557.44            | 291.41             |
| A_68_P24383688 | chr6:39508034-39508079                            | NM_172477-223           | Dennd2a       | PROMOTER               | 0.407                                                        | 0.588                          | 1614.11            | 949.25             | 0.239                          | 1128.93            | 270.38             |
| A_68_P26822030 | chr9:110019511-110019555                          | NM_133347-1446          | Dhx30         | PROMOTER               | 0.407                                                        | 0.637                          | 1377.60            | 877.71             | 0.260                          | 1241.84            | 322.32             |
| A_68_P27991096 | chr11:86621298-86621342                           | NM_026191-158           | Dhx40         | PROMOTER               | 0.407                                                        | 0.538                          | 1239.12            | 666.15             | 0.219                          | 916.71             | 200.56             |
| A_68_P27281569 | chr10:79649352-79649396                           | NM_007909-7148          | Efna2         | INSIDE                 | 0.407                                                        | 1.541                          | 1256.56            | 1936.53            | 0.627                          | 969.03             | 607.79             |
| A_68_P28924080 | chr13:31718919-31718963                           | NM_010225-1256          | Foxf2         | INSIDE                 | 0.407                                                        | 0.689                          | 3172.57            | 2185.00            | 0.281                          | 2213.14            | 621.08             |
| A_68_P31151371 | chr17:34115239-34115283                           | NR_004446-476           | H2-K2         | INSIDE                 | 0.407                                                        | 0.456                          | 1605.18            | 731.55             | 0.185                          | 1385.24            | 256.72             |
| A_68_P25098818 | chr7:53652536-53652580                            | NM_001112739-692        | Kenc1         | INSIDE                 | 0.407                                                        | 0.400                          | 1311.52            | 524.24             | 0.163                          | 975.14             | 158.73             |
| A_68_P29110673 | chr13:68720745-68720789                           | NM_172480-232           | Mtrr          | INSIDE                 | 0.407                                                        | 0.371                          | 1931.95            | 716.22             | 0.151                          | 1508.16            | 227.48             |
| A_68_P24176700 | chr5:148769468-148769512                          | NM_029920-595           | Mtus2         | INSIDE                 | 0.407                                                        | 0.526                          | 1630.86            | 857.36             | 0.214                          | 1291.13            | 276.17             |
| A_68_P26610636 | chr9:69245924-69245968                            | NM_145618-142           | Narg2         | INSIDE                 | 0.407                                                        | 0.384                          | 5793.84            | 2227.06            | 0.156                          | 4240.45            | 663.08             |
| A_68_P29603748 | chr14:52533567-52533611                           | NM_001145959-425        | Ndrp2         | DIVERGENT_PROMOTER     | 0.407                                                        | 0.480                          | 1560.30            | 749.06             | 0.196                          | 1153.20            | 225.46             |
| A_68_P28614148 | chr12:88443473-88443517                           | NM_022414-5             | Ngb           | PROMOTER               | 0.407                                                        | 0.415                          | 1799.48            | 746.75             | 0.169                          | 1681.23            | 284.09             |
| A_68_P29701296 | chr14:70843268-70843313                           | NM_025945-12            | Polr3d        | DIVERGENT_PROMOTER     | 0.407                                                        | 0.631                          | 2190.63            | 1383.25            | 0.257                          | 1603.41            | 411.96             |
| A_68_P22889897 | chr4:46663588-46663636                            | NM_198664-541           | Tbc1d2        | PROMOTER               | 0.407                                                        | 0.662                          | 982.47             | 650.35             | 0.269                          | 767.27             | 206.69             |
| A_68_P29418923 | chr14:14794239-14794283                           | NM_025435-521           | Thoc7         | PROMOTER               | 0.407                                                        | 0.537                          | 1962.94            | 1053.66            | 0.218                          | 1739.95            | 379.84             |
| A_68_P27294064 | chr10:82321765-82321809                           | NM_001042513-164        | Txnd1         | PROMOTER               | 0.407                                                        | 0.407                          | 1520.91            | 618.76             | 0.166                          | 1187.54            | 196.62             |
| A_68_P22704455 | chr4:6118180-6118224                              | NM_026534-49            | Ubxn2b        | PROMOTER               | 0.407                                                        | 0.671                          | 1912.76            | 1284.31            | 0.274                          | 1666.37            | 455.81             |
| A_68_P31175221 | chr17:39982297-39982341                           | ENSMUST00000157647-1752 |               | PROMOTER               | 0.407                                                        | 1.649                          | 95563.17           | 157538.30          | 0.672                          | 68246.85           | 45830.39           |
| A_68_P28202484 | chr12:4824078-4824122                             | NM_025323-313           | 0610009D07Rik | PROMOTER               | 0.406                                                        | 0.608                          | 1944.10            | 1181.96            | 0.247                          | 1603.98            | 395.49             |
| A_68_P24167402 | chr5:147042562-147042606                          | NM_153599-666           | Cdk8          | DIVERGENT_PROMOTER     | 0.406                                                        | 0.608                          | 1352.14            | 821.47             | 0.246                          | 1139.57            | 280.81             |
| A_68_P21317592 | chr2:70956339-70956383                            | NM_028593-250           | Cybrd1        | INSIDE                 | 0.406                                                        | 0.558                          | 1737.90            | 970.02             | 0.226                          | 1323.53            | 299.72             |
| A_68_P28914787 | chr13:30077407-30077451                           | NM_010093-504           | E2f3          | INSIDE                 | 0.406                                                        | 0.611                          | 2612.84            | 1596.12            | 0.248                          | 2058.37            | 509.93             |
| A_68_P27897961 | chr11:69734599-69734643                           | NM_001166596-33         | Eif5a         | PROMOTER               | 0.406                                                        | 0.463                          | 1940.76            | 898.54             | 0.188                          | 1546.60            | 290.79             |
| A_68_P20826008 | chr11:172995959-172996003                         | NM_010188-6446          | Fcgr3         | PROMOTER               | 0.406                                                        | 0.350                          | 18198.05           | 6361.85            | 0.142                          | 15322.08           | 2176.74            |
| A_68_P29053524 | chr13:55254501-55254545                           | NM_008011-344           | Fgfr4         | INSIDE                 | 0.406                                                        | 1.439                          | 1816.38            | 2614.22            | 0.584                          | 1466.89            | 857.10             |
| A_68_P31347822 | chr17:74058856-74058900                           | NM_027864-913           | Galnt14       | INSIDE                 | 0.406                                                        | 0.542                          | 1480.35            | 802.89             | 0.220                          | 1057.71            | 232.90             |
| A_68_P27812596 | chr11:54716387-54716431                           | NM_008161-19            | Gpx3          | PROMOTER               | 0.406                                                        | 0.537                          | 985.97             | 529.92             | 0.218                          | 768.72             | 167.64             |
| A_68_P26134295 | chr8:108042675-108042719                          | NM_008289-51            | Hsd11b2       | INSIDE                 | 0.406                                                        | 0.730                          | 2677.10            | 1954.81            | 0.296                          | 1979.05            | 586.14             |
| A_68_P25780634 | chr8:36651604-36651648                            | NM_001081279-775        | Mhas1         | INSIDE                 | 0.406                                                        | 0.482                          | 1783.48            | 859.18             | 0.196                          | 1341.49            | 262.70             |
| A_68_P31201772 | chr17:45692808-45692853                           | NM_008690-166           | Nfkbia        | INSIDE                 | 0.406                                                        | 0.497                          | 1713.85            | 852.26             | 0.202                          | 1237.60            | 249.77             |
| A_68_P20231215 | chr11:53354231-53354281                           | NM_145517-318           | Ormdl1        | INSIDE                 | 0.406                                                        | 0.534                          | 1129.37            | 603.42             | 0.217                          | 980.16             | 212.39             |
| A_68_P26546675 | chr9:58094820-58094867                            | NM_008884-2750          | Pml           | INSIDE                 | 0.406                                                        | 0.442                          | 1835.96            | 811.92             | 0.180                          | 1371.08            | 246.26             |
| A_68_P21103105 | chr2:30272089-30272133                            | NM_138748-541           | Ppp2r4        | INSIDE                 | 0.406                                                        | 0.636                          | 3968.58            | 2525.95            | 0.258                          | 2830.49            | 731.40             |

| ProbeName      | Target position of probe on CpG island microarray | TargetID                 | GeneSymbol    | CpG island Description | Ratio of relative methylation (TiO <sub>2</sub> -NP/Vehicle) | Sham group                     |                    |                    | TiO <sub>2</sub> -H group      |                    |                    |
|----------------|---------------------------------------------------|--------------------------|---------------|------------------------|--------------------------------------------------------------|--------------------------------|--------------------|--------------------|--------------------------------|--------------------|--------------------|
|                |                                                   |                          |               |                        |                                                              | Relative methylation (Cy5/Cy3) | Cy3 signal (Input) | Cy5 signal (MeDIP) | Relative methylation (Cy5/Cy3) | Cy3 signal (Input) | Cy5 signal (MeDIP) |
| A_68_P30970947 | chr16:92697153-92697197                           | NM_001111023:399         | Runx1         | INSIDE                 | 0.406                                                        | 0.515                          | 2685.30            | 1382.40            | 0.209                          | 2016.68            | 421.81             |
| A_68_P30393147 | chr15:84022777-84022821                           | NM_178614:136            | Samm50        | INSIDE                 | 0.406                                                        | 0.691                          | 3994.97            | 2761.52            | 0.280                          | 3060.42            | 858.38             |
| A_68_P21597425 | chr2:124435761-124435806                          | NM_172537:-248           | Sema6d        | PROMOTER               | 0.406                                                        | 0.615                          | 871.15             | 535.88             | 0.249                          | 650.35             | 162.24             |
| A_68_P27673282 | chr11:29072968-29073015                           | NM_134034:85             | Smek2         | INSIDE                 | 0.406                                                        | 0.639                          | 949.47             | 606.88             | 0.260                          | 796.75             | 206.96             |
| A_68_P27798797 | chr11:52174094-52174138                           | NM_011694:-500           | Vdac1         | PROMOTER               | 0.406                                                        | 0.650                          | 1764.27            | 1146.33            | 0.264                          | 1315.69            | 346.88             |
| A_68_P25352337 | chr7:104937215-104937259                          | ENSMUST00000172423:186   |               | INSIDE                 | 0.406                                                        | 0.665                          | 1482.59            | 985.69             | 0.270                          | 1357.36            | 366.22             |
| A_68_P25712955 | chr8:23915948-23915992                            | NM_001122820:156         | Ap3m2         | INSIDE                 | 0.405                                                        | 0.626                          | 938.42             | 587.32             | 0.253                          | 785.72             | 199.13             |
| A_68_P26132522 | chr8:107778665-107778709                          | NM_178879:365            | B3gnt9-ps     | INSIDE                 | 0.405                                                        | 0.596                          | 1716.07            | 1023.62            | 0.242                          | 1234.29            | 298.28             |
| A_68_P26349632 | chr9:21741348-21741392                            | NM_144935:-1347          | BC018242      | PROMOTER               | 0.405                                                        | 0.437                          | 1486.50            | 649.65             | 0.177                          | 1174.97            | 207.88             |
| A_68_P26445764 | chr9:40684336-40684380                            | NM_178245:2149           | Bsx           | INSIDE                 | 0.405                                                        | 0.423                          | 1901.12            | 803.37             | 0.171                          | 1525.03            | 260.78             |
| A_68_P23271159 | chr4:124613810-124613854                          | NM_026560:329            | Cdca8         | INSIDE                 | 0.405                                                        | 0.625                          | 2290.39            | 1431.64            | 0.253                          | 1723.95            | 436.25             |
| A_68_P27173114 | chr10:59681401-59681445                           | NM_016803:586            | Chst3         | INSIDE                 | 0.405                                                        | 0.480                          | 1633.42            | 783.31             | 0.194                          | 1275.03            | 247.62             |
| A_68_P26248660 | chr8:127472125-127472169                          | NM_053207:1008           | Egln1         | INSIDE                 | 0.405                                                        | 0.419                          | 1430.66            | 598.91             | 0.170                          | 1160.96            | 197.05             |
| A_68_P23590781 | chr5:34064587-34064631                            | NM_001163216:-346        | Fgfr3         | PROMOTER               | 0.405                                                        | 0.530                          | 3266.43            | 1729.91            | 0.215                          | 2438.35            | 523.55             |
| A_68_P22522346 | chr3:129533887-129533931                          | NM_026578:406            | Gar1          | INSIDE                 | 0.405                                                        | 0.598                          | 2284.02            | 1365.84            | 0.242                          | 1847.04            | 446.89             |
| A_68_P23404324 | chr4:149475624-149475668                          | NM_177366:14035          | Gpr157        | INSIDE                 | 0.405                                                        | 1.773                          | 2904.68            | 5150.79            | 0.719                          | 2051.82            | 1474.86            |
| A_68_P29010701 | chr13:47026038-47026093                           | NM_010617:-978           | Kif13a        | PROMOTER               | 0.405                                                        | 0.484                          | 1767.47            | 854.99             | 0.196                          | 1333.63            | 261.42             |
| A_68_P28206071 | chr12:5382006-5382050                             | NM_001164493:460         | Klhl29        | INSIDE                 | 0.405                                                        | 0.524                          | 3088.99            | 1617.12            | 0.212                          | 2432.86            | 515.70             |
| A_68_P25279963 | chr7:90017868-90017912                            | NM_175366:2048           | Mex3b         | INSIDE                 | 0.405                                                        | 0.636                          | 1415.44            | 900.30             | 0.258                          | 1133.24            | 291.99             |
| A_68_P25953855 | chr8:73284899-73284943                            | NM_183170:-100           | Mpv17l2       | PROMOTER               | 0.405                                                        | 0.408                          | 2453.08            | 1000.94            | 0.165                          | 1787.56            | 295.51             |
| A_68_P22705747 | chr4:6380739-6380783                              | NM_010945:658            | Nsmaf         | INSIDE                 | 0.405                                                        | 0.415                          | 1617.03            | 671.38             | 0.168                          | 1348.70            | 226.72             |
| A_68_P23308592 | chr4:131393872-131393916                          | NM_001083119:299         | Ptpru         | INSIDE                 | 0.405                                                        | 1.432                          | 2326.39            | 3331.75            | 0.580                          | 1769.52            | 1025.80            |
| A_68_P22129913 | chr3:51288449-51288493                            | NM_016858:583            | Rab33b        | INSIDE                 | 0.405                                                        | 0.485                          | 1658.46            | 804.34             | 0.196                          | 1337.61            | 262.75             |
| A_68_P23330841 | chr4:135411994-135412038                          | NM_001080387:10          | Srsf10        | INSIDE                 | 0.405                                                        | 0.543                          | 2145.64            | 1166.05            | 0.220                          | 1597.74            | 351.61             |
| A_68_P28037462 | chr11:95085010-95085054                           | ENSMUST00000150818:1914  |               | INSIDE                 | 0.405                                                        | 0.545                          | 1408.10            | 767.79             | 0.221                          | 1060.48            | 234.02             |
| A_68_P28448910 | chr12:55757351-55757395                           | NM_134054:187            | 1110002B05Rik | INSIDE                 | 0.404                                                        | 0.509                          | 1885.11            | 959.65             | 0.206                          | 1424.62            | 293.29             |
| A_68_P29750659 | chr14:79701095-79701139                           | NM_025427:326            | 1190002H23Rik | INSIDE                 | 0.404                                                        | 0.574                          | 1404.21            | 805.56             | 0.232                          | 1064.58            | 246.87             |
| A_68_P26240062 | chr8:126001616-126001660                          | NM_054070:-123           | Afg3l1        | PROMOTER               | 0.404                                                        | 0.494                          | 2109.64            | 1041.20            | 0.199                          | 1607.97            | 320.67             |
| A_68_P26236517 | chr8:125394810-125394862                          | NM_007662:22563          | Cdh15         | DOWNSTREAM             | 0.404                                                        | 1.403                          | 1945.50            | 2728.65            | 0.566                          | 1315.85            | 745.01             |
| A_68_P30822062 | chr16:64851258-64851302                           | NM_178647:-630           | Cggbp1        | PROMOTER               | 0.404                                                        | 0.519                          | 3183.58            | 1650.75            | 0.210                          | 2462.97            | 516.24             |
| A_68_P27284377 | chr10:80085062-80085106                           | NM_134002:-440           | Csnk1g2       | PROMOTER               | 0.404                                                        | 0.629                          | 1419.87            | 892.51             | 0.254                          | 1060.64            | 269.20             |
| A_68_P24620360 | chr6:88148968-88149012                            | NM_008090:333            | Gata2         | INSIDE                 | 0.404                                                        | 0.683                          | 2322.07            | 1585.49            | 0.276                          | 1713.63            | 472.62             |
| A_68_P23318326 | chr4:133140776-133140820                          | NM_133884:511            | Gpn2          | INSIDE                 | 0.404                                                        | 0.640                          | 1169.25            | 748.32             | 0.259                          | 985.30             | 254.87             |
| A_68_P32090702 | chr19:36629470-36629514                           | NM_001163471:364         | Hectd2        | INSIDE                 | 0.404                                                        | 0.272                          | 2373.47            | 646.01             | 0.110                          | 1953.97            | 214.88             |
| A_68_P25616729 | chr8:4238967-4239011                              | NM_001042557:249         | Map2k7        | INSIDE                 | 0.404                                                        | 0.580                          | 2908.83            | 1687.64            | 0.234                          | 2062.11            | 483.10             |
| A_68_P29510753 | chr14:32064135-32064185                           | NM_027949:244            | Phf7          | INSIDE                 | 0.404                                                        | 0.534                          | 960.26             | 513.16             | 0.216                          | 777.89             | 167.83             |
| A_68_P31254158 | chr17:56281426-56281470                           | NM_001130456:-1682       | Sema6b        | PROMOTER               | 0.404                                                        | 0.581                          | 2799.57            | 1627.69            | 0.235                          | 2130.76            | 500.62             |
| A_68_P27842505 | chr11:60166539-60166583                           | NM_001039092:-153        | Tom1l2        | DIVERGENT_PROMOTER     | 0.404                                                        | 0.361                          | 1587.91            | 572.60             | 0.146                          | 1187.68            | 172.87             |
| A_68_P22869764 | chr4:43071791-43071835                            | NM_001081413:-43         | Unc13b        | PROMOTER               | 0.404                                                        | 0.501                          | 1272.86            | 637.85             | 0.202                          | 1133.30            | 229.43             |
| A_68_P21622217 | chr2:128769546-128769590                          | NM_020594:188            | Zc3h8         | INSIDE                 | 0.404                                                        | 0.554                          | 1092.21            | 605.07             | 0.224                          | 984.96             | 220.62             |
| A_68_P22616117 | chr3:146348087-146348133                          | ENSMUST00000147113:-2624 |               | PROMOTER               | 0.404                                                        | 1.480                          | 1311.76            | 1941.95            | 0.598                          | 1012.61            | 605.60             |
| A_68_P28053985 | chr11:97883420-97883464                           | NM_001159320:-3756       | Caenb1        | PROMOTER               | 0.403                                                        | 0.437                          | 1225.57            | 535.50             | 0.176                          | 1003.72            | 176.92             |
| A_68_P26207422 | chr8:120807660-120807704                          | NM_019707:28             | Cdh13         | INSIDE                 | 0.403                                                        | 0.463                          | 1396.49            | 647.17             | 0.187                          | 1115.55            | 208.39             |
| A_68_P24799552 | chr6:120615622-120615666                          | NM_001128151:-794        | Cecr2         | PROMOTER               | 0.403                                                        | 0.603                          | 3552.63            | 2143.25            | 0.243                          | 2839.95            | 689.74             |
| A_68_P31666414 | chr18:44540418-44540462                           | NM_027490:287            | Dep2          | INSIDE                 | 0.403                                                        | 0.471                          | 1722.26            | 811.15             | 0.190                          | 1330.43            | 252.26             |
| A_68_P29702644 | chr14:71041729-71041773                           | NM_008004:325            | Fgf17         | INSIDE                 | 0.403                                                        | 0.627                          | 2188.74            | 1371.28            | 0.252                          | 1859.32            | 469.04             |
| A_68_P25361482 | chr7:106530807-106530853                          | NM_201352:772            | Gdpd5         | INSIDE                 | 0.403                                                        | 1.577                          | 1363.77            | 2150.15            | 0.636                          | 979.45             | 622.45             |
| A_68_P28744398 | chr12:112723379-112723423                         | NM_001033248:634         | Gm266         | INSIDE                 | 0.403                                                        | 0.466                          | 1750.51            | 815.19             | 0.188                          | 1666.67            | 313.00             |
| A_68_P24126241 | chr5:137971926-137971970                          | NM_010312:2509           | Gnb2          | INSIDE                 | 0.403                                                        | 0.702                          | 1875.13            | 1316.69            | 0.283                          | 1528.56            | 432.65             |
| A_68_P31940699 | chr19:7686892-7686936                             | NM_025731:-144           | Hrasl5        | DIVERGENT_PROMOTER     | 0.403                                                        | 0.677                          | 2664.39            | 1803.92            | 0.273                          | 1908.10            | 520.63             |
| A_68_P31425157 | chr17:88197480-88197524                           | NM_199251:-168           | Kenk12        | PROMOTER               | 0.403                                                        | 0.466                          | 4375.97            | 2037.15            | 0.188                          | 3471.60            | 651.98             |

| ProbeName      | Target position of probe on CpG island microarray | TargetID           | GeneSymbol    | CpG island Description | Ratio of relative methylation (TiO <sub>2</sub> -NP/Vehicle) | Sham group                     |                    |                    | TiO <sub>2</sub> -H group      |                    |                    |
|----------------|---------------------------------------------------|--------------------|---------------|------------------------|--------------------------------------------------------------|--------------------------------|--------------------|--------------------|--------------------------------|--------------------|--------------------|
|                |                                                   |                    |               |                        |                                                              | Relative methylation (Cy5/Cy3) | Cy3 signal (Input) | Cy5 signal (MeDIP) | Relative methylation (Cy5/Cy3) | Cy3 signal (Input) | Cy5 signal (MeDIP) |
| A_68_P29650241 | chr14:62058563-62058607                           | NM_008466:200      | Kpna3         | INSIDE                 | 0.403                                                        | 0.405                          | 1537.06            | 622.81             | 0.163                          | 1438.25            | 235.02             |
| A_68_P27890684 | chr11:68505119-68505163                           | NM_175260:-276     | Myh10         | PROMOTER               | 0.403                                                        | 0.664                          | 1027.75            | 682.38             | 0.268                          | 863.61             | 231.22             |
| A_68_P26346140 | chr9:21048545-21048589                            | NM_053190:4321     | S1pr5         | INSIDE                 | 0.403                                                        | 0.535                          | 1135.96            | 608.15             | 0.216                          | 1006.93            | 217.15             |
| A_68_P22049514 | chr3:34563117-34563161                            | NR_015580:103836   | Sox2ot        | INSIDE                 | 0.403                                                        | 0.484                          | 2066.20            | 999.89             | 0.195                          | 1574.89            | 307.29             |
| A_68_P20353934 | chr1:75419154-75419198                            | NM_001085370:36992 | Speg          | INSIDE                 | 0.403                                                        | 1.343                          | 4896.31            | 6574.99            | 0.541                          | 3345.01            | 1810.88            |
| A_68_P30133048 | chr15:35300905-35300956                           | NM_177151:-370     | Vps13b        | PROMOTER               | 0.403                                                        | 0.492                          | 1070.04            | 526.44             | 0.198                          | 848.32             | 168.32             |
| A_68_P24118436 | chr5:136379600-136379644                          | NM_018871:30889    | Ywhag         | DOWNSTREAM             | 0.403                                                        | 0.634                          | 1135.29            | 719.87             | 0.256                          | 915.76             | 234.26             |
| A_68_P29604086 | chr14:52604738-52604782                           | NM_001145921:253   | Arhgef40      | INSIDE                 | 0.402                                                        | 0.420                          | 2403.91            | 1009.44            | 0.169                          | 1831.28            | 309.16             |
| A_68_P27129528 | chr10:50312762-50312806                           | NM_001146089:310   | Ascc3         | INSIDE                 | 0.402                                                        | 0.639                          | 3730.88            | 2382.81            | 0.257                          | 3140.60            | 806.64             |
| A_68_P20258660 | chr1:58449893-58449937                            | NM_025824:-65      | Bzw1          | PROMOTER               | 0.402                                                        | 0.379                          | 2338.44            | 886.59             | 0.152                          | 1931.23            | 294.39             |
| A_68_P21425690 | chr2:91804013-91804057                            | NM_138306:-314     | Dgkz          | PROMOTER               | 0.402                                                        | 1.354                          | 2042.05            | 2764.55            | 0.544                          | 1585.34            | 862.03             |
| A_68_P29257118 | chr13:99124161-99124205                           | NM_008242:-17      | Foxd1         | PROMOTER               | 0.402                                                        | 0.510                          | 1490.33            | 760.15             | 0.205                          | 1157.08            | 237.16             |
| A_68_P24112565 | chr5:134789851-134789895                          | NM_001080746:744   | Gtf2i         | INSIDE                 | 0.402                                                        | 0.714                          | 2256.93            | 1612.52            | 0.287                          | 1769.13            | 508.52             |
| A_68_P23120716 | chr4:94719068-94719112                            | NM_010591:-177     | Jun           | PROMOTER               | 0.402                                                        | 0.423                          | 1296.90            | 548.96             | 0.170                          | 1043.85            | 177.68             |
| A_68_P28961839 | chr13:38726652-38726696                           | NM_139063:304      | Muted         | INSIDE                 | 0.402                                                        | 0.532                          | 1082.81            | 575.86             | 0.214                          | 844.67             | 180.51             |
| A_68_P20039230 | chr1:13116543-13116587                            | NM_001081209:680   | Prdm14        | INSIDE                 | 0.402                                                        | 0.572                          | 3613.44            | 2067.32            | 0.230                          | 2620.44            | 603.08             |
| A_68_P31560663 | chr18:24688162-24688206                           | NM_144861:521      | Rprd1a        | INSIDE                 | 0.402                                                        | 0.580                          | 1300.04            | 753.96             | 0.233                          | 1070.85            | 249.46             |
| A_68_P28540843 | chr12:75065592-75065636                           | NM_178392:98       | Snapc1        | INSIDE                 | 0.402                                                        | 0.389                          | 1905.69            | 741.84             | 0.157                          | 1618.55            | 253.52             |
| A_68_P24880090 | chr6:137684038-137684082                          | NM_011499:458      | Strap         | INSIDE                 | 0.402                                                        | 0.565                          | 2008.73            | 1135.59            | 0.227                          | 1503.42            | 341.29             |
| A_68_P21818004 | chr2:164287014-164287058                          | NM_025575:566      | Sys1          | INSIDE                 | 0.402                                                        | 0.517                          | 1359.86            | 703.50             | 0.208                          | 1188.15            | 247.05             |
| A_68_P23223137 | chr4:114730092-114730136                          | NM_011527:-2017    | Tal1          | PROMOTER               | 0.402                                                        | 1.506                          | 1521.71            | 2292.42            | 0.606                          | 1280.29            | 776.17             |
| A_68_P24452213 | chr6:52663843-52663887                            | NM_025816:142      | Tax1bp1       | INSIDE                 | 0.402                                                        | 0.633                          | 1114.69            | 706.07             | 0.255                          | 971.26             | 247.36             |
| A_68_P30344891 | chr15:75741091-75741135                           | NM_178646:948      | Tigd5         | INSIDE                 | 0.402                                                        | 0.694                          | 2910.45            | 2020.64            | 0.279                          | 2088.38            | 583.52             |
| A_68_P31951351 | chr19:10630157-10630201                           | NM_026798:550      | Tmem216       | INSIDE                 | 0.402                                                        | 1.573                          | 3244.90            | 5105.54            | 0.633                          | 2382.85            | 1508.24            |
| A_68_P28746254 | chr12:113052004-113052048                         | NM_028875:26       | Xrcc3         | INSIDE                 | 0.402                                                        | 0.647                          | 4008.98            | 2594.96            | 0.260                          | 3067.97            | 797.87             |
| A_68_P27541962 | chr10:127984459-127984503                         | NM_134003:320      | Zc3h10        | INSIDE                 | 0.402                                                        | 0.565                          | 1308.93            | 738.91             | 0.227                          | 1006.35            | 228.22             |
| A_68_P31166723 | chr17:37139521-37139565                           | NR_033137:-1068    | Zfp57         | PROMOTER               | 0.402                                                        | 0.568                          | 1340.99            | 761.64             | 0.228                          | 962.23             | 219.44             |
| A_68_P20730836 | chr1:156052430-156052474                          | NM_001204908:4136  | Zfp648        | INSIDE                 | 0.402                                                        | 0.615                          | 1327.37            | 815.96             | 0.247                          | 1041.18            | 257.49             |
| A_68_P31063097 | A_68_P31063097                                    |                    |               | Unknown                | 0.402                                                        | 0.663                          | 4637.87            | 3076.43            | 0.267                          | 3485.76            | 929.33             |
| A_68_P29848868 | chr14:100685092-100685136                         | AK021307:-1508     |               | PROMOTER               | 0.402                                                        | 0.403                          | 1857.91            | 748.70             | 0.162                          | 1431.64            | 231.79             |
| A_68_P27904030 | chr11:70846911-70846955                           | NM_134022:187      | 6330403K07Rik | INSIDE                 | 0.401                                                        | 0.439                          | 1364.46            | 599.38             | 0.176                          | 1066.17            | 187.83             |
| A_68_P31259844 | chr17:57201624-57201668                           | NM_177638:-53      | Crb3          | DIVERGENT_PROMOTER     | 0.401                                                        | 0.600                          | 1139.58            | 684.20             | 0.241                          | 965.34             | 232.70             |
| A_68_P25588981 | chr7:148648103-148648147                          | NM_001025103:1132  | Efcab4a       | INSIDE                 | 0.401                                                        | 0.489                          | 1279.57            | 625.46             | 0.196                          | 951.70             | 186.53             |
| A_68_P28865541 | chr13:20183122-20183166                           | NM_080288:769      | Elmo1         | INSIDE                 | 0.401                                                        | 0.362                          | 2120.48            | 767.66             | 0.145                          | 1712.97            | 248.82             |
| A_68_P32219644 | chr19:59541958-59542009                           | NM_010132:8804     | Emx2          | DOWNSTREAM             | 0.401                                                        | 0.501                          | 1502.12            | 752.11             | 0.201                          | 1161.64            | 233.43             |
| A_68_P31741004 | chr18:58369796-58369845                           | NM_010181:-240     | Fbn2          | PROMOTER               | 0.401                                                        | 0.672                          | 1429.00            | 960.85             | 0.270                          | 1189.50            | 320.74             |
| A_68_P21137836 | chr2:35960496-35960540                            | NM_001083126:-938  | Lhx6          | PROMOTER               | 0.401                                                        | 1.336                          | 8929.66            | 11925.85           | 0.536                          | 6249.44            | 3346.87            |
| A_68_P31601524 | chr18:32323271-32323316                           | NM_011946:551      | Map3k2        | INSIDE                 | 0.401                                                        | 0.591                          | 1415.59            | 837.13             | 0.237                          | 1152.26            | 273.12             |
| A_68_P27281301 | chr10:79613466-79613510                           | NM_021565:2454     | Midn          | INSIDE                 | 0.401                                                        | 0.367                          | 1465.23            | 537.97             | 0.147                          | 1036.83            | 152.57             |
| A_68_P30359767 | chr15:78240574-78240618                           | NM_138670:3063     | Mpst          | INSIDE                 | 0.401                                                        | 0.682                          | 1086.67            | 740.80             | 0.274                          | 845.19             | 231.31             |
| A_68_P26555228 | chr9:59599330-59599374                            | NM_173018:372      | Myo9a         | INSIDE                 | 0.401                                                        | 0.623                          | 1581.72            | 985.65             | 0.250                          | 1278.00            | 319.75             |
| A_68_P23328803 | chr4:135050627-135050671                          | NM_028995:-229     | Nipal3        | DIVERGENT_PROMOTER     | 0.401                                                        | 0.553                          | 1557.06            | 861.22             | 0.222                          | 1180.18            | 261.60             |
| A_68_P28185376 | chr11:120434174-120434218                         | NM_011032:54       | P4hb          | INSIDE                 | 0.401                                                        | 0.405                          | 1978.78            | 800.88             | 0.162                          | 1637.81            | 265.81             |
| A_68_P27921382 | chr11:74403457-74403501                           | NM_001015046:182   | Rap1gap2      | INSIDE                 | 0.401                                                        | 0.564                          | 1202.64            | 678.74             | 0.227                          | 932.96             | 211.38             |
| A_68_P26874898 | chr9:119803985-119804029                          | NM_026236:-6       | Wdr48         | PROMOTER               | 0.401                                                        | 0.449                          | 1258.18            | 565.02             | 0.180                          | 961.70             | 173.28             |
| A_68_P21394205 | chr2:84554801-84554845                            | NM_144887:499      | Zdhhc5        | INSIDE                 | 0.401                                                        | 0.723                          | 2712.89            | 1962.11            | 0.290                          | 2037.85            | 590.93             |
| A_68_P24465593 | chr6:54766531-54766575                            | NM_199143:-357     | Znrf2         | PROMOTER               | 0.401                                                        | 0.670                          | 2222.15            | 1489.45            | 0.269                          | 1707.36            | 459.35             |
| A_68_P27852925 | chr11:62062872-62062916                           | NM_007413:409      | Adora2b       | INSIDE                 | 0.400                                                        | 0.617                          | 1152.32            | 711.48             | 0.247                          | 829.07             | 204.77             |
| A_68_P24050080 | chr5:122842069-122842113                          | NM_019824:154      | Arpc3         | INSIDE                 | 0.400                                                        | 0.718                          | 4394.64            | 3154.81            | 0.287                          | 3316.23            | 952.58             |
| A_68_P27826629 | chr11:57458793-57458837                           | NM_134189:-129     | Galnt10       | PROMOTER               | 0.400                                                        | 0.608                          | 3664.79            | 2229.96            | 0.244                          | 2544.15            | 619.66             |
| A_68_P26445381 | chr9:40609139-40609183                            | NM_031165:-195     | Hspa8         | PROMOTER               | 0.400                                                        | 0.691                          | 1034.99            | 714.85             | 0.276                          | 879.47             | 242.73             |

| ProbeName      | Target position of probe on CpG island microarray | TargetID                | GeneSymbol  | CpG island Description | Ratio of relative methylation (TiO <sub>2</sub> -NP/Vehicle) | Sham group                     |                    |                    | TiO <sub>2</sub> -H group      |                    |                    |
|----------------|---------------------------------------------------|-------------------------|-------------|------------------------|--------------------------------------------------------------|--------------------------------|--------------------|--------------------|--------------------------------|--------------------|--------------------|
|                |                                                   |                         |             |                        |                                                              | Relative methylation (Cy5/Cy3) | Cy3 signal (Input) | Cy5 signal (MeDIP) | Relative methylation (Cy5/Cy3) | Cy3 signal (Input) | Cy5 signal (MeDIP) |
| A_68_P26258430 | chr8:129118076-129118120                          | NM_001164598:-762       | Irf2bp2     | PROMOTER               | 0.400                                                        | 0.721                          | 1718.04            | 1238.29            | 0.289                          | 1460.35            | 421.48             |
| A_68_P30498330 | chr15:102347068-102347112                         | NM_001163643:345        | Map3k12     | INSIDE                 | 0.400                                                        | 1.500                          | 2499.08            | 3748.29            | 0.600                          | 1607.42            | 964.83             |
| A_68_P25009541 | chr7:26082496-26082540                            | NM_008776:456           | Pafah1b3    | INSIDE                 | 0.400                                                        | 0.438                          | 1706.65            | 746.98             | 0.175                          | 1461.72            | 256.05             |
| A_68_P25588866 | chr7:148633186-148633239                          | NM_026020:-336          | Rplp2       | DIVERGENT_PROMOTER     | 0.400                                                        | 0.587                          | 1498.29            | 879.31             | 0.235                          | 1091.39            | 255.97             |
| A_68_P24591631 | chr6:83086000-83086044                            | NM_009106:-1055         | Rtkn        | PROMOTER               | 0.400                                                        | 0.655                          | 1225.70            | 802.41             | 0.262                          | 828.16             | 216.99             |
| A_68_P31259829 | chr17:57199355-57199400                           | NM_025877:-91           | Sle2sa23    | DIVERGENT_PROMOTER     | 0.400                                                        | 0.589                          | 2001.97            | 1180.00            | 0.236                          | 1472.23            | 347.15             |
| A_68_P29218728 | chr13:91601752-91601796                           | NM_024186:1073          | Ssbp2       | INSIDE                 | 0.400                                                        | 0.631                          | 1627.78            | 1026.95            | 0.252                          | 1284.93            | 323.86             |
| A_68_P25184111 | chr7:72838614-72838658                            | NM_026795:334           | Tm2d3       | INSIDE                 | 0.400                                                        | 0.349                          | 1726.28            | 602.90             | 0.140                          | 1348.93            | 188.30             |
| A_68_P30660864 | chr16:33966979-33967023                           | NM_009471:89            | Umps        | INSIDE                 | 0.400                                                        | 0.552                          | 1618.29            | 893.67             | 0.221                          | 1283.96            | 283.85             |
| A_68_P24056367 | chr5:124022745-124022789                          | NM_029929:258           | Vps33a      | INSIDE                 | 0.400                                                        | 0.514                          | 1120.84            | 576.62             | 0.206                          | 884.82             | 181.92             |
| A_68_P25603239 | chr7:151016135-151016179                          | NM_007856:7085          | Dhcr7       | INSIDE                 | 0.399                                                        | 0.597                          | 1125.54            | 672.50             | 0.238                          | 815.91             | 194.46             |
| A_68_P23796637 | chr5:73647888-73647932                            | NM_028194:-53           | Fryl        | PROMOTER               | 0.399                                                        | 0.474                          | 1998.35            | 946.81             | 0.189                          | 1621.76            | 306.32             |
| A_68_P26020978 | chr8:87186231-87186275                            | NM_010499:499           | Ier2        | INSIDE                 | 0.399                                                        | 0.277                          | 1961.30            | 542.96             | 0.110                          | 1579.44            | 174.25             |
| A_68_P24132967 | chr5:139470355-139470399                          | NM_008808:531           | Pdgfa       | INSIDE                 | 0.399                                                        | 0.437                          | 1789.36            | 781.96             | 0.174                          | 1451.55            | 253.04             |
| A_68_P23699207 | chr5:53604122-53604166                            | NM_172710:547           | Sel1l3      | INSIDE                 | 0.399                                                        | 0.533                          | 1774.42            | 945.20             | 0.212                          | 1363.90            | 289.58             |
| A_68_P21608668 | chr2:126379204-126379249                          | NM_011978:467           | Sle27a2     | INSIDE                 | 0.399                                                        | 0.514                          | 2438.81            | 1252.84            | 0.205                          | 1823.73            | 373.99             |
| A_68_P29455907 | chr14:22808867-22808911                           | NM_145459:-65           | Zfp503      | PROMOTER               | 0.399                                                        | 0.569                          | 1604.07            | 911.92             | 0.227                          | 1214.52            | 275.57             |
| A_68_P31144955 | chr17:32457753-32457797                           | NM_019774:324           | Akap8       | INSIDE                 | 0.398                                                        | 0.543                          | 1365.85            | 741.62             | 0.216                          | 1107.07            | 239.38             |
| A_68_P30541084 | chr16:10193396-10193440                           | NM_029253:420           | Att7ip2     | INSIDE                 | 0.398                                                        | 0.608                          | 995.72             | 605.68             | 0.242                          | 813.64             | 197.17             |
| A_68_P29480513 | chr14:26747056-26747103                           | NM_025311:-343          | D14Ert4449c | PROMOTER               | 0.398                                                        | 0.358                          | 1735.25            | 621.67             | 0.143                          | 1456.35            | 207.60             |
| A_68_P29651217 | chr14:62268108-62268159                           | NR_028264:33077         | Dleu2       | INSIDE                 | 0.398                                                        | 0.543                          | 1443.25            | 783.46             | 0.216                          | 1158.50            | 250.08             |
| A_68_P26957818 | chr10:14264701-14264745                           | NM_001002268:120        | Gpr126      | INSIDE                 | 0.398                                                        | 0.467                          | 1511.94            | 705.41             | 0.186                          | 1275.00            | 236.56             |
| A_68_P28833519 | chr13:12742906-12742950                           | NR_003568:-266          | Gpr137b-ps  | PROMOTER               | 0.398                                                        | 0.363                          | 4391.82            | 1592.50            | 0.144                          | 3385.93            | 488.41             |
| A_68_P28157577 | chr11:115999946-115999990                         | NM_024177:214           | Mrp138      | INSIDE                 | 0.398                                                        | 0.493                          | 3724.44            | 1836.53            | 0.196                          | 2843.38            | 558.00             |
| A_68_P21485378 | chr2:103601161-103601205                          | NM_153126:225           | Nat10       | INSIDE                 | 0.398                                                        | 0.618                          | 3637.53            | 2248.47            | 0.246                          | 2544.68            | 625.73             |
| A_68_P26349534 | chr9:21722752-21722796                            | NM_031874:-209          | Rab3d       | PROMOTER               | 0.398                                                        | 0.403                          | 1561.47            | 629.94             | 0.160                          | 1150.25            | 184.58             |
| A_68_P28052672 | chr11:97643844-97643889                           | NM_022891:-113          | Rpl23       | PROMOTER               | 0.398                                                        | 0.606                          | 1390.97            | 842.99             | 0.241                          | 1054.91            | 254.30             |
| A_68_P27891995 | chr11:68714810-68714854                           | NM_009080:-235          | Rpl26       | PROMOTER               | 0.398                                                        | 0.694                          | 3449.52            | 2393.87            | 0.276                          | 2457.62            | 679.51             |
| A_68_P26316376 | chr9:14081279-14081323                            | NM_030261:556           | Sesn3       | INSIDE                 | 0.398                                                        | 0.552                          | 1345.98            | 743.47             | 0.220                          | 1037.83            | 228.33             |
| A_68_P29288689 | chr13:104900121-104900165                         | NM_144838:273           | Sgtb        | INSIDE                 | 0.398                                                        | 0.583                          | 3354.69            | 1956.35            | 0.232                          | 2336.34            | 542.22             |
| A_68_P20585378 | chr11:127457195-127457239                         | NM_028787:-376          | Sle35f5     | PROMOTER               | 0.398                                                        | 0.549                          | 1232.48            | 677.04             | 0.218                          | 1037.55            | 226.65             |
| A_68_P26165834 | chr8:113494088-113494132                          | NM_009179:50346         | St3gal2     | INSIDE                 | 0.398                                                        | 0.677                          | 1222.12            | 827.61             | 0.269                          | 901.87             | 242.81             |
| A_68_P26644959 | chr9:75458604-75458648                            | NM_016711:506           | Tmod2       | INSIDE                 | 0.398                                                        | 0.426                          | 2977.71            | 1268.02            | 0.170                          | 2449.97            | 415.69             |
| A_68_P22323363 | chr3:89884285-89884329                            | NM_022314:7691          | Tpm3        | INSIDE                 | 0.398                                                        | 0.365                          | 1427.82            | 521.52             | 0.145                          | 1038.00            | 150.77             |
| A_68_P32700071 | chrX:137134752-137134796                          | NM_001077364:287        | Tsc22d3     | INSIDE                 | 0.398                                                        | 3.957                          | 5767.82            | 2282.44            | 1.575                          | 2608.73            | 4107.70            |
| A_68_P23862543 | chr5:86601868-86601912                            | NM_172712:-122          | Uba6        | PROMOTER               | 0.398                                                        | 0.692                          | 2387.01            | 1652.51            | 0.275                          | 1949.46            | 536.57             |
| A_68_P29703308 | chr14:71165727-71165771                           | NM_023045:687           | Xpo7        | INSIDE                 | 0.398                                                        | 0.702                          | 1752.43            | 1229.46            | 0.279                          | 1340.90            | 374.38             |
| A_68_P33008825 | chr4_random:109830-109874                         | NM_001033326:51         | Dhrsx       | INSIDE                 | 0.397                                                        | 0.470                          | 1833.30            | 861.33             | 0.186                          | 1457.07            | 271.74             |
| A_68_P22318526 | chr3:89120527-89120571                            | NM_010108:6253          | Efn3a       | INSIDE                 | 0.397                                                        | 0.639                          | 1485.97            | 948.79             | 0.254                          | 1110.36            | 281.80             |
| A_68_P26224353 | chr8:123607977-123608021                          | NM_010426:-375          | Foxfla      | PROMOTER               | 0.397                                                        | 0.504                          | 1890.38            | 952.54             | 0.200                          | 1686.45            | 337.20             |
| A_68_P21571367 | chr2:119584322-119584366                          | NM_008523:-83           | Ltk         | PROMOTER               | 0.397                                                        | 0.476                          | 1630.05            | 775.10             | 0.189                          | 1333.23            | 251.49             |
| A_68_P26581610 | chr9:64233768-64233812                            | NM_172522:358           | Megf1       | INSIDE                 | 0.397                                                        | 0.699                          | 2374.21            | 1658.78            | 0.277                          | 1758.64            | 487.33             |
| A_68_P30232954 | chr15:55388910-55388954                           | NM_001168250:-30        | Mtbp        | DIVERGENT_PROMOTER     | 0.397                                                        | 0.432                          | 3116.90            | 1347.01            | 0.172                          | 2372.98            | 407.34             |
| A_68_P29011114 | chr13:47109579-47109623                           | NM_175340:619           | Nhlrc1      | INSIDE                 | 0.397                                                        | 0.517                          | 1150.56            | 595.40             | 0.206                          | 823.92             | 169.45             |
| A_68_P24981712 | chr7:17061914-17061958                            | NM_008718:193           | Npas1       | INSIDE                 | 0.397                                                        | 0.712                          | 2890.67            | 2056.71            | 0.283                          | 2241.41            | 633.52             |
| A_68_P23820901 | chr5:77739843-77739887                            | NM_153798:356           | Polr2b      | INSIDE                 | 0.397                                                        | 0.647                          | 1612.02            | 1043.01            | 0.257                          | 1284.16            | 330.01             |
| A_68_P23301758 | chr4:130219950-130220000                          | NM_001159603:701        | Pum1        | INSIDE                 | 0.397                                                        | 0.586                          | 1032.44            | 605.24             | 0.232                          | 893.17             | 207.63             |
| A_68_P32741829 | chrX:146893580-146893628                          | NM_001164683:89         | Tmem29      | INSIDE                 | 0.397                                                        | 0.687                          | 1246.33            | 855.90             | 0.273                          | 436.00             | 118.86             |
| A_68_P22970878 | chr4:63156551-63156595                            | NM_001008791:413        | Whrn        | INSIDE                 | 0.397                                                        | 0.613                          | 3917.18            | 2399.98            | 0.243                          | 2938.54            | 714.69             |
| A_68_P24385306 | chr6:39822132-39822176                            |                         | Unknown     |                        | 0.397                                                        | 0.469                          | 2589.32            | 1213.47            | 0.186                          | 2062.60            | 383.60             |
| A_68_P26640506 | chr9:74696583-74696627                            | ENSMUST00000160842:-197 |             | PROMOTER               | 0.397                                                        | 0.658                          | 970.12             | 638.12             | 0.261                          | 740.58             | 193.51             |



| ProbeName      | Target position of probe on CpG island microarray | TargetID               | GeneSymbol    | CpG island Description | Ratio of relative methylation (TiO <sub>2</sub> -NP/Vehicle) | Sham group                     |                    |                    | TiO <sub>2</sub> -H group      |                    |                    |
|----------------|---------------------------------------------------|------------------------|---------------|------------------------|--------------------------------------------------------------|--------------------------------|--------------------|--------------------|--------------------------------|--------------------|--------------------|
|                |                                                   |                        |               |                        |                                                              | Relative methylation (Cy5/Cy3) | Cy3 signal (Input) | Cy5 signal (MeDIP) | Relative methylation (Cy5/Cy3) | Cy3 signal (Input) | Cy5 signal (MeDIP) |
| A_68_P27835480 | chr11:59021879-59021923                           | NM_024210:38           | 2310033P09Rik | INSIDE                 | 0.396                                                        | 0.576                          | 2695.23            | 1552.55            | 0.228                          | 1958.86            | 446.66             |
| A_68_P24222134 | chr6:7643189-7643233                              | NM_012055:-28          | Asns          | PROMOTER               | 0.396                                                        | 0.542                          | 2387.82            | 1293.90            | 0.215                          | 2052.41            | 440.34             |
| A_68_P24991257 | chr7:19661336-19661380                            | NM_010058:-190         | Dmwd          | PROMOTER               | 0.396                                                        | 0.616                          | 1112.54            | 684.81             | 0.244                          | 889.48             | 217.03             |
| A_68_P29047193 | chr13:54150633-54150677                           | NM_010076:373          | Drd1a         | INSIDE                 | 0.396                                                        | 0.545                          | 2490.00            | 1356.97            | 0.216                          | 1903.02            | 411.08             |
| A_68_P31097235 | chr17:24563756-24563800                           | NM_010023:151          | Eci1          | INSIDE                 | 0.396                                                        | 0.527                          | 3129.78            | 1648.81            | 0.209                          | 2436.59            | 508.04             |
| A_68_P21202304 | chr2:49307386-49307430                            | NM_172663:403          | Epc2          | INSIDE                 | 0.396                                                        | 0.453                          | 2466.98            | 1117.64            | 0.179                          | 1901.54            | 341.08             |
| A_68_P26023481 | chr8:87584180-87584224                            | NM_026791:185          | Fbxw9         | INSIDE                 | 0.396                                                        | 0.627                          | 1561.81            | 978.68             | 0.248                          | 1215.89            | 301.53             |
| A_68_P22311356 | chr3:87827542-87827586                            | NM_022031:3869         | Hapln2        | INSIDE                 | 0.396                                                        | 0.664                          | 2761.76            | 1833.73            | 0.263                          | 1981.97            | 520.78             |
| A_68_P25196754 | chr7:75097245-75097289                            | NM_010513:124          | Igflr         | INSIDE                 | 0.396                                                        | 0.473                          | 3320.88            | 1569.80            | 0.187                          | 2477.45            | 464.14             |
| A_68_P20833276 | chr1:174412036-174412080                          | NM_001145800:-285      | Igsf9         | PROMOTER               | 0.396                                                        | 0.574                          | 1317.37            | 756.65             | 0.228                          | 1156.57            | 263.21             |
| A_68_P23399813 | chr4:148681750-148681794                          | NM_207682:35           | Kif1b         | INSIDE                 | 0.396                                                        | 0.601                          | 2997.35            | 1800.31            | 0.238                          | 2346.60            | 557.57             |
| A_68_P30482203 | chr15:99603119-99603163                           | NM_028015:-194         | Lass5         | PROMOTER               | 0.396                                                        | 0.596                          | 2632.96            | 1568.15            | 0.236                          | 2144.25            | 506.20             |
| A_68_P27163119 | chr10:57785941-57785985                           | NM_026148:-251         | Lims1         | PROMOTER               | 0.396                                                        | 0.680                          | 1897.17            | 1290.62            | 0.269                          | 1413.46            | 380.81             |
| A_68_P23839619 | chr5:81758936-81758980                            | NM_198702:308341       | Lphn3         | INSIDE                 | 0.396                                                        | 1.822                          | 2298.64            | 4187.16            | 0.722                          | 1764.06            | 1273.14            |
| A_68_P24792499 | chr6:119280504-119280548                          | NM_001172207:-1304     | Lrtm2         | PROMOTER               | 0.396                                                        | 0.523                          | 1726.40            | 903.05             | 0.207                          | 1158.45            | 239.74             |
| A_68_P27940743 | chr11:77796384-77796428                           | NM_174852:89           | Phf12         | INSIDE                 | 0.396                                                        | 0.423                          | 4734.44            | 2004.16            | 0.168                          | 3592.41            | 602.73             |
| A_68_P20632578 | chr1:136195654-136195698                          | NM_001144855:33829     | Ppfi4         | INSIDE                 | 0.396                                                        | 0.708                          | 1305.46            | 924.84             | 0.281                          | 1092.82            | 306.60             |
| A_68_P21212092 | chr2:51004822-51004866                            | NM_028810:-213         | Rnd3          | PROMOTER               | 0.396                                                        | 0.586                          | 1113.91            | 653.02             | 0.232                          | 521.16             | 120.98             |
| A_68_P22339768 | chr3:94386146-94386190                            | NM_029721:456          | Snx27         | INSIDE                 | 0.396                                                        | 0.513                          | 10731.28           | 5502.96            | 0.203                          | 7576.74            | 1538.58            |
| A_68_P23281702 | chr4:126409701-126409745                          | NM_198960:3791         | Tefap2c       | INSIDE                 | 0.396                                                        | 0.646                          | 816.79             | 527.67             | 0.256                          | 636.94             | 163.10             |
| A_68_P23231032 | chr4:116480068-116480112                          | NM_026654:74           | Toe1          | INSIDE                 | 0.396                                                        | 0.637                          | 1622.39            | 1033.81            | 0.252                          | 1277.20            | 322.39             |
| A_68_P20293015 | chr1:64579497-64579541                            | NM_001037726:141       | Creb1         | INSIDE                 | 0.395                                                        | 1.637                          | 1498.43            | 2452.72            | 0.646                          | 1044.74            | 674.70             |
| A_68_P29571975 | chr14:46276736-46276780                           | NM_001039106:1060      | Ddhd1         | INSIDE                 | 0.395                                                        | 0.513                          | 2910.02            | 1493.49            | 0.203                          | 2124.93            | 430.75             |
| A_68_P23981089 | chr5:111082753-111082797                          | NM_027156:305          | Ddx51         | INSIDE                 | 0.395                                                        | 1.415                          | 2235.79            | 3162.99            | 0.559                          | 1524.12            | 851.91             |
| A_68_P23917030 | chr5:98682994-98683038                            | NM_010203:-186         | Fgf5          | PROMOTER               | 0.395                                                        | 0.553                          | 1859.16            | 1027.23            | 0.218                          | 1360.03            | 296.52             |
| A_68_P29996526 | chr15:7765753-7765797                             | NM_010275:4764         | Gdnf          | INSIDE                 | 0.395                                                        | 0.703                          | 1521.03            | 1069.87            | 0.278                          | 1204.55            | 334.90             |
| A_68_P23571067 | chr5:30482177-30482221                            | NM_145558:337          | Hadhb         | INSIDE                 | 0.395                                                        | 0.651                          | 971.59             | 632.21             | 0.257                          | 751.39             | 193.05             |
| A_68_P27262211 | chr10:75931408-75931452                           | NM_019434:-285         | Mcm3ap        | PROMOTER               | 0.395                                                        | 0.628                          | 2981.60            | 1872.43            | 0.248                          | 2404.79            | 596.32             |
| A_68_P30359739 | chr15:78237110-78237154                           | NM_001162493:-9        | Mpst          | DIVERGENT_PROMOTER     | 0.395                                                        | 0.517                          | 1965.86            | 1015.55            | 0.204                          | 1519.10            | 309.59             |
| A_68_P22378553 | chr3:101816844-101816888                          | NM_178777:2799         | Nhlh2         | INSIDE                 | 0.395                                                        | 0.497                          | 2536.22            | 1261.46            | 0.197                          | 2171.96            | 426.83             |
| A_68_P28457454 | chr12:57636900-57636944                           | NM_001146198:-829      | Nkx2-1        | PROMOTER               | 0.395                                                        | 0.568                          | 2415.54            | 1372.50            | 0.225                          | 1730.29            | 388.75             |
| A_68_P27283560 | chr10:79958022-79958066                           | NM_139226:394          | Onecut3       | INSIDE                 | 0.395                                                        | 0.559                          | 2970.49            | 1661.40            | 0.221                          | 2195.37            | 484.90             |
| A_68_P26823553 | chr9:110310358-110310402                          | NM_001081043:334       | Ptpn23        | INSIDE                 | 0.395                                                        | 0.521                          | 1283.21            | 669.17             | 0.206                          | 1086.75            | 223.83             |
| A_68_P27846981 | chr11:60988586-60988630                           | NM_001004143:-47       | Usp22         | PROMOTER               | 0.395                                                        | 0.591                          | 3307.59            | 1953.18            | 0.233                          | 2575.10            | 600.24             |
| A_68_P28956456 | chr13:37870834-37870878                           | ENSMUST00000122842:588 |               | INSIDE                 | 0.395                                                        | 0.686                          | 1883.01            | 1292.51            | 0.271                          | 1291.09            | 350.38             |
| A_68_P20262085 | chr1:59176968-59177012                            | NM_001033449:-50       | Als2cr4       | PROMOTER               | 0.394                                                        | 0.586                          | 1764.61            | 1034.63            | 0.231                          | 1379.76            | 318.35             |
| A_68_P22407408 | chr3:107399047-107399091                          | NM_007441:1120         | Aix3          | INSIDE                 | 0.394                                                        | 0.699                          | 1352.07            | 945.75             | 0.276                          | 993.19             | 273.74             |
| A_68_P29020643 | chr13:48755179-48755223                           | NM_007526:-3204        | Barx1         | PROMOTER               | 0.394                                                        | 0.473                          | 1255.55            | 593.95             | 0.186                          | 993.02             | 185.15             |
| A_68_P20616256 | chr1:133424915-133424959                          | NM_175382:371          | Fam72a        | INSIDE                 | 0.394                                                        | 0.598                          | 939.33             | 561.70             | 0.235                          | 773.66             | 182.08             |
| A_68_P24804136 | chr6:121363612-121363660                          | NM_001033354:60060     | Iqsec3        | INSIDE                 | 0.394                                                        | 1.459                          | 861.78             | 1257.28            | 0.575                          | 728.64             | 419.21             |
| A_68_P22934427 | chr4:55544464-55544508                            | NM_010637:861          | Klf4          | INSIDE                 | 0.394                                                        | 0.566                          | 1638.41            | 926.60             | 0.223                          | 1245.95            | 277.60             |
| A_68_P27351981 | chr10:92624097-92624141                           | NR_035452:-1411        | Mir1931       | PROMOTER               | 0.394                                                        | 0.461                          | 1435.67            | 661.71             | 0.182                          | 1234.00            | 224.27             |
| A_68_P22029224 | chr3:30501291-30501335                            | NM_030557:304          | Mynn          | INSIDE                 | 0.394                                                        | 0.491                          | 1203.66            | 591.48             | 0.194                          | 948.31             | 183.80             |
| A_68_P22509733 | chr3:127337069-127337113                          | NM_009718:1028         | Neurog2       | INSIDE                 | 0.394                                                        | 0.536                          | 1400.00            | 750.34             | 0.211                          | 1146.46            | 242.10             |
| A_68_P29228004 | chr13:93962351-93962395                           | NM_133905:-134         | Papd4         | PROMOTER               | 0.394                                                        | 0.345                          | 2639.04            | 910.03             | 0.136                          | 2030.41            | 275.52             |
| A_68_P27982131 | chr11:85124251-85124295                           | NM_016910:-483         | Ppm1d         | PROMOTER               | 0.394                                                        | 0.440                          | 1279.88            | 563.48             | 0.173                          | 1059.51            | 183.63             |
| A_68_P31306706 | chr17:66869156-66869200                           | NM_024448:-168         | Rab12         | PROMOTER               | 0.394                                                        | 0.563                          | 2387.55            | 1344.99            | 0.222                          | 1888.64            | 419.35             |
| A_68_P30425525 | chr15:89329138-89329182                           | NM_021423:-1127        | Shank3        | PROMOTER               | 0.394                                                        | 0.589                          | 1347.03            | 794.03             | 0.232                          | 1002.00            | 232.85             |
| A_68_P24039146 | chr5:120961225-120961269                          | NM_001177594:46        | Slc24a6       | INSIDE                 | 0.394                                                        | 0.528                          | 3211.48            | 1697.21            | 0.208                          | 2575.83            | 536.78             |
| A_68_P31886106 | chr18:84257584-84257628                           | NM_146090:57           | Zadhd2        | INSIDE                 | 0.394                                                        | 0.377                          | 3025.06            | 1141.33            | 0.149                          | 2306.11            | 342.56             |
| A_68_P25834611 | chr8:47248829-47248873                            | NM_025747:-6059        | 4933411K20Rik | PROMOTER               | 0.393                                                        | 0.377                          | 1891.58            | 713.22             | 0.148                          | 1452.97            | 215.28             |

| ProbeName      | Target position of probe on CpG island microarray | TargetID                | GeneSymbol    | CpG island Description | Ratio of relative methylation (TiO <sub>2</sub> -NP/Vehicle) | Sham group                     |                    |                    | TiO <sub>2</sub> -H group      |                    |                    |
|----------------|---------------------------------------------------|-------------------------|---------------|------------------------|--------------------------------------------------------------|--------------------------------|--------------------|--------------------|--------------------------------|--------------------|--------------------|
|                |                                                   |                         |               |                        |                                                              | Relative methylation (Cy5/Cy3) | Cy3 signal (Input) | Cy5 signal (MeDIP) | Relative methylation (Cy5/Cy3) | Cy3 signal (Input) | Cy5 signal (MeDIP) |
| A_68_P26397644 | chr9:30729778-30729822                            | NM_001024139:237        | Adams15       | INSIDE                 | 0.393                                                        | 0.551                          | 1105.34            | 609.40             | 0.217                          | 921.87             | 199.88             |
| A_68_P27104595 | chr10:43988364-43988408                           | NM_053069:223           | Atg5          | INSIDE                 | 0.393                                                        | 0.648                          | 1331.05            | 862.37             | 0.255                          | 1161.90            | 295.86             |
| A_68_P27903680 | chr11:70796542-70796586                           | NM_007573:-36           | C1qbp         | PROMOTER               | 0.393                                                        | 0.533                          | 1532.93            | 816.29             | 0.209                          | 1280.18            | 267.89             |
| A_68_P26527663 | chr9:54613548-54613592                            | NM_013496:956           | Crabp1        | INSIDE                 | 0.393                                                        | 0.518                          | 1434.66            | 742.44             | 0.203                          | 1097.56            | 223.21             |
| A_68_P32097101 | chr19:37772874-37772918                           | NM_007811:599           | Cyp26a1       | INSIDE                 | 0.393                                                        | 0.426                          | 1213.97            | 517.08             | 0.167                          | 1052.81            | 176.09             |
| A_68_P32030090 | chr19:25580813-25580857                           | NM_015826:639           | Dmrt1         | INSIDE                 | 0.393                                                        | 0.736                          | 4472.71            | 3292.67            | 0.289                          | 3179.73            | 919.43             |
| A_68_P24687559 | chr6:99616974-99617018                            | NM_025829:-231          | Eif4e3        | PROMOTER               | 0.393                                                        | 0.659                          | 1635.27            | 1077.16            | 0.259                          | 1160.44            | 300.29             |
| A_68_P30261333 | chr15:60656265-60656309                           | NM_001162926:349        | Fam84b        | INSIDE                 | 0.393                                                        | 0.655                          | 1042.70            | 683.29             | 0.258                          | 911.55             | 234.94             |
| A_68_P28558324 | chr12:78338946-78338990                           | NM_016893:-1039         | Fut8          | PROMOTER               | 0.393                                                        | 0.501                          | 2557.23            | 1281.73            | 0.197                          | 2032.50            | 400.01             |
| A_68_P27862299 | chr11:63735880-63735924                           | NM_018805:-116          | Hs3st3b1      | PROMOTER               | 0.393                                                        | 0.443                          | 2224.84            | 984.97             | 0.174                          | 1748.73            | 304.15             |
| A_68_P28377243 | chr12:40949898-40949942                           | NM_013562:-144          | Irfid1        | PROMOTER               | 0.393                                                        | 0.573                          | 1938.73            | 1110.44            | 0.225                          | 1465.35            | 330.17             |
| A_68_P26345197 | chr9:20842972-20843016                            | NR_035438:-6222         | Mir1900       | PROMOTER               | 0.393                                                        | 0.633                          | 1129.22            | 715.19             | 0.249                          | 905.51             | 225.62             |
| A_68_P29269917 | chr13:101514369-101514413                         | NM_001190264:224        | Mrps36        | INSIDE                 | 0.393                                                        | 0.562                          | 1483.16            | 833.55             | 0.221                          | 1137.24            | 251.42             |
| A_68_P25848475 | chr8:49640835-49640879                            | NM_001145937:119188     | Odz3          | INSIDE                 | 0.393                                                        | 0.623                          | 1717.71            | 1069.53            | 0.245                          | 1357.53            | 332.13             |
| A_68_P20412615 | chr1:88425095-88425139                            | NM_008972:1806          | Ptma          | INSIDE                 | 0.393                                                        | 0.704                          | 1399.14            | 985.11             | 0.277                          | 1200.12            | 332.10             |
| A_68_P23328512 | chr4:134989887-134989933                          | NM_022980:-190          | Recan3        | PROMOTER               | 0.393                                                        | 0.620                          | 1491.84            | 925.02             | 0.244                          | 1175.09            | 286.59             |
| A_68_P27911313 | chr11:72224759-72224803                           | NM_177776:435           | Smtnl2        | INSIDE                 | 0.393                                                        | 0.562                          | 1527.09            | 858.89             | 0.221                          | 1231.22            | 271.86             |
| A_68_P27792049 | chr11:50872760-50872804                           | NM_009329:24            | Zfp354a       | INSIDE                 | 0.393                                                        | 0.466                          | 1271.52            | 592.67             | 0.183                          | 1116.60            | 204.33             |
| A_68_P20258664 | chr1:58450590-58450634                            | NM_025824:633           | Bzw1          | INSIDE                 | 0.392                                                        | 0.644                          | 1254.18            | 807.72             | 0.252                          | 1054.82            | 266.06             |
| A_68_P25354352 | chr7:105326428-105326472                          | NM_007602:253           | Capn5         | INSIDE                 | 0.392                                                        | 0.666                          | 2220.45            | 1478.16            | 0.261                          | 1546.65            | 403.21             |
| A_68_P22523142 | chr3:129672517-129672561                          | NM_025779:586           | Ccdc109b      | INSIDE                 | 0.392                                                        | 0.505                          | 2604.71            | 1315.65            | 0.198                          | 1951.55            | 386.76             |
| A_68_P26085416 | chr8:98331248-98331292                            | NM_001205226:92         | Cnot1         | INSIDE                 | 0.392                                                        | 0.403                          | 2325.01            | 938.12             | 0.158                          | 1832.93            | 289.72             |
| A_68_P30648664 | chr16:31663664-31663708                           | NM_007862:-438          | Dlg1          | PROMOTER               | 0.392                                                        | 0.458                          | 3597.39            | 1647.10            | 0.180                          | 2613.64            | 469.67             |
| A_68_P20317730 | chr1:69154592-69154636                            | NM_010154:19            | Erbp4         | INSIDE                 | 0.392                                                        | 0.422                          | 1426.54            | 601.74             | 0.165                          | 1216.30            | 201.21             |
| A_68_P23331511 | chr4:135528428-135528472                          | NM_011942:59            | Lypla2        | INSIDE                 | 0.392                                                        | 0.473                          | 1769.63            | 837.26             | 0.185                          | 1552.06            | 287.58             |
| A_68_P26884585 | chr9:121550768-121550812                          | NM_026915:-106          | Lyzl4         | DIVERGENT_PROMOTER     | 0.392                                                        | 0.586                          | 1165.46            | 682.57             | 0.229                          | 885.62             | 203.12             |
| A_68_P22278905 | chr3:82162143-82162187                            | NM_001081230:171        | Mtap9         | INSIDE                 | 0.392                                                        | 0.487                          | 1290.87            | 628.19             | 0.191                          | 1051.49            | 200.76             |
| A_68_P26017700 | chr8:86550149-86550193                            | NM_028877:4798          | Palm3         | INSIDE                 | 0.392                                                        | 1.362                          | 4053.05            | 5519.11            | 0.533                          | 2798.18            | 1491.77            |
| A_68_P31207973 | chr17:46766171-46766215                           | NM_175168:261           | Ptk7          | INSIDE                 | 0.392                                                        | 0.571                          | 1376.75            | 786.16             | 0.224                          | 1101.03            | 246.77             |
| A_68_P24819295 | chr6:125141439-125141483                          | NR_028517:-5011         | Scarna10      | PROMOTER               | 0.392                                                        | 0.538                          | 2141.51            | 1152.69            | 0.211                          | 1553.71            | 328.17             |
| A_68_P31260730 | chr17:57388800-57388844                           | NM_134125:-51           | Trip10        | DIVERGENT_PROMOTER     | 0.392                                                        | 0.608                          | 3559.47            | 2163.18            | 0.238                          | 2651.86            | 631.60             |
| A_68_P31206982 | chr17:46592667-46592712                           | NM_001162864:31935      | Tibk1         | INSIDE                 | 0.392                                                        | 1.403                          | 1399.62            | 1963.16            | 0.549                          | 1059.83            | 582.08             |
| A_68_P31206981 | chr17:46592555-46592609                           | NM_001162864:32042      | Tibk1         | INSIDE                 | 0.392                                                        | 1.717                          | 3863.90            | 6635.69            | 0.673                          | 2504.05            | 1685.58            |
| A_68_P24974124 | chr7:13594887-13594931                            | NM_001024699:241        | Zbtb45        | INSIDE                 | 0.392                                                        | 1.550                          | 8940.84            | 13859.75           | 0.607                          | 5657.47            | 3435.24            |
| A_68_P20350710 | chr1:74863740-74863784                            |                         | Unknown       |                        | 0.392                                                        | 0.672                          | 1297.47            | 872.32             | 0.264                          | 974.28             | 257.03             |
| A_68_P25890691 | chr8:59819908-59819952                            | ENSMUST00000132988:9016 |               | DOWNSTREAM             | 0.392                                                        | 0.484                          | 1350.03            | 653.38             | 0.189                          | 1096.54            | 207.78             |
| A_68_P29699594 | chr14:70553626-70553670                           | NM_146055:-50           | 2610301G19Rik | PROMOTER               | 0.391                                                        | 0.531                          | 1427.31            | 757.25             | 0.207                          | 1115.67            | 231.50             |
| A_68_P21438173 | chr2:93816579-93816623                            | NM_026944:34287         | Alkbh3        | DOWNSTREAM             | 0.391                                                        | 0.698                          | 1383.11            | 965.21             | 0.273                          | 1073.71            | 293.35             |
| A_68_P22503487 | chr3:126300546-126300590                          | NM_001025438:678        | Camk2d        | INSIDE                 | 0.391                                                        | 0.431                          | 2047.11            | 883.00             | 0.169                          | 1532.12            | 258.42             |
| A_68_P30026217 | chr15:13103232-13103276                           | NM_007666:140           | Cdh6          | INSIDE                 | 0.391                                                        | 0.672                          | 4209.50            | 2829.81            | 0.263                          | 2762.48            | 726.88             |
| A_68_P22550732 | chr3:134875583-134875627                          | NM_173762:78            | Cenpe         | INSIDE                 | 0.391                                                        | 0.608                          | 1219.19            | 740.70             | 0.237                          | 914.46             | 216.97             |
| A_68_P21132485 | chr2:35111777-35111821                            | NM_001206367:-80        | Gsn           | PROMOTER               | 0.391                                                        | 0.613                          | 2026.14            | 1242.11            | 0.240                          | 1463.14            | 350.71             |
| A_68_P27497669 | chr10:119912366-119912410                         | NM_010441:1603          | Hmga2         | INSIDE                 | 0.391                                                        | 0.640                          | 1046.27            | 669.85             | 0.251                          | 783.71             | 196.34             |
| A_68_P25678163 | chr8:15011860-15011904                            | NM_029116:858           | Kbtbd11       | INSIDE                 | 0.391                                                        | 0.478                          | 1570.57            | 749.98             | 0.186                          | 1240.73            | 231.39             |
| A_68_P28089844 | chr11:104092991-104093035                         | NM_001038609:263        | Mapt          | INSIDE                 | 0.391                                                        | 1.364                          | 2693.55            | 3672.88            | 0.533                          | 1860.12            | 991.85             |
| A_68_P21817647 | chr2:164229981-164230025                          | NM_013592:112           | Matn4         | INSIDE                 | 0.391                                                        | 0.476                          | 1295.63            | 616.22             | 0.186                          | 1035.52            | 192.49             |
| A_68_P27184368 | chr10:61595655-61595699                           | NM_009719:-161          | Neurog3       | PROMOTER               | 0.391                                                        | 0.630                          | 2160.43            | 1360.12            | 0.246                          | 1755.04            | 431.48             |
| A_68_P29075345 | chr13:58907821-58907865                           | NM_008745:-114          | Ntrk2         | PROMOTER               | 0.391                                                        | 0.692                          | 1892.71            | 1310.54            | 0.271                          | 1464.42            | 396.74             |
| A_68_P30397294 | chr15:84684736-84684780                           | NM_001081166:1801       | Phf21b        | INSIDE                 | 0.391                                                        | 0.463                          | 1726.92            | 800.27             | 0.181                          | 1439.78            | 261.16             |
| A_68_P25435185 | chr7:121419707-121419751                          | NM_011965:-98           | Psm1          | PROMOTER               | 0.391                                                        | 0.724                          | 2831.07            | 2050.70            | 0.283                          | 2139.61            | 605.66             |
| A_68_P28683722 | chr12:101962780-101962824                         | NM_153587:436           | Rps6ka5       | INSIDE                 | 0.391                                                        | 0.589                          | 1867.99            | 1100.53            | 0.230                          | 1460.70            | 336.55             |

| ProbeName      | Target position of probe on CpG island microarray | TargetID               | GeneSymbol    | CpG island Description | Ratio of relative methylation (TiO <sub>2</sub> -NP/Vehicle) | Sham group                     |                    |                    | TiO <sub>2</sub> -H group      |                    |                    |
|----------------|---------------------------------------------------|------------------------|---------------|------------------------|--------------------------------------------------------------|--------------------------------|--------------------|--------------------|--------------------------------|--------------------|--------------------|
|                |                                                   |                        |               |                        |                                                              | Relative methylation (Cy5/Cy3) | Cy3 signal (Input) | Cy5 signal (MeDIP) | Relative methylation (Cy5/Cy3) | Cy3 signal (Input) | Cy5 signal (MeDIP) |
| A_68_P26467387 | chr9:44205049-44205093                            | NM_008063:-1188        | Slc37a4       | PROMOTER               | 0.391                                                        | 0.721                          | 1626.23            | 1172.93            | 0.282                          | 1467.19            | 414.12             |
| A_68_P20038594 | chr1:12981919-12981963                            | NM_172841:-724         | Slco5a1       | PROMOTER               | 0.391                                                        | 0.619                          | 903.30             | 558.79             | 0.242                          | 770.40             | 186.25             |
| A_68_P22887519 | chr4:46209270-46209318                            | NM_011728:-111         | Xpa           | PROMOTER               | 0.391                                                        | 0.602                          | 964.46             | 580.45             | 0.236                          | 743.18             | 175.04             |
| A_68_P26038366 | chr8:90484574-90484618                            | NM_033327:-1102        | Zfp423        | PROMOTER               | 0.391                                                        | 0.702                          | 2889.02            | 2027.03            | 0.275                          | 2132.18            | 585.63             |
| A_68_P28577068 | chr12:81793936-81793980                           | NM_001177503:371       | 3830431G21Rik | INSIDE                 | 0.390                                                        | 0.530                          | 1326.37            | 703.50             | 0.207                          | 1003.11            | 207.54             |
| A_68_P30349161 | chr15:76406872-76406916                           | NM_172960:106          | Adek5         | INSIDE                 | 0.390                                                        | 0.474                          | 2356.78            | 1117.91            | 0.185                          | 1905.00            | 352.18             |
| A_68_P21151655 | chr2:38863832-38863876                            | NM_028809:196          | Arpc5l        | INSIDE                 | 0.390                                                        | 0.589                          | 4486.65            | 2640.44            | 0.230                          | 3453.30            | 793.23             |
| A_68_P24115147 | chr5:135662582-135662626                          | NM_011714:-588         | Baz1b         | PROMOTER               | 0.390                                                        | 0.583                          | 2093.19            | 1220.19            | 0.227                          | 1622.42            | 368.86             |
| A_68_P25436575 | chr7:121706623-121706670                          | NM_177382:-160         | Cyp2r1        | PROMOTER               | 0.390                                                        | 0.629                          | 1074.68            | 675.45             | 0.245                          | 783.63             | 191.86             |
| A_68_P21320095 | chr2:71379350-71379394                            | NR_002854:-3424        | Dlx1as        | PROMOTER               | 0.390                                                        | 0.546                          | 2383.88            | 1302.44            | 0.213                          | 1831.75            | 390.00             |
| A_68_P25575621 | chr7:146271919-146271963                          | NM_011993:41           | Dpysl4        | INSIDE                 | 0.390                                                        | 0.561                          | 2409.39            | 1351.91            | 0.219                          | 1732.06            | 378.82             |
| A_68_P28158191 | chr11:116099429-116099473                         | NM_025276:-45          | Evp1          | PROMOTER               | 0.390                                                        | 0.689                          | 1292.37            | 890.62             | 0.169                          | 1148.19            | 308.81             |
| A_68_P20339086 | chr1:72872062-72872107                            | NM_008342:1008         | Igfbp2        | INSIDE                 | 0.390                                                        | 0.451                          | 1799.04            | 811.95             | 0.176                          | 1379.23            | 242.69             |
| A_68_P21680286 | chr2:139503286-139503330                          | NM_001126490:-605      | lsm1          | PROMOTER               | 0.390                                                        | 0.557                          | 2940.12            | 1637.95            | 0.217                          | 2220.95            | 482.08             |
| A_68_P32122223 | chr19:42674559-42674603                           | NM_001164311:12716     | Loxl4         | INSIDE                 | 0.390                                                        | 1.433                          | 1197.83            | 1716.78            | 0.559                          | 945.09             | 528.24             |
| A_68_P26319355 | chr9:14588836-14588880                            | NM_018736:-292         | Mrel1a        | DIVERGENT_PROMOTER     | 0.390                                                        | 0.581                          | 1999.35            | 1161.35            | 0.227                          | 1453.26            | 329.26             |
| A_68_P24643638 | chr6:92133742-92133786                            | NM_025578:253          | Mrps25        | INSIDE                 | 0.390                                                        | 0.494                          | 1982.78            | 978.66             | 0.192                          | 1582.60            | 304.52             |
| A_68_P25507198 | chr7:134913587-134913631                          | NM_198424:280          | Orai3         | INSIDE                 | 0.390                                                        | 0.574                          | 1146.27            | 658.43             | 0.224                          | 942.27             | 210.99             |
| A_68_P32240897 | chrX:7499587-7499631                              | NM_013892:2661         | Peskn1        | INSIDE                 | 0.390                                                        | 1.478                          | 1634.44            | 2416.47            | 0.577                          | 700.79             | 404.31             |
| A_68_P28107256 | chr11:107331453-107331497                         | NM_145823:560          | Pitpnc1       | INSIDE                 | 0.390                                                        | 0.646                          | 918.10             | 592.76             | 0.252                          | 663.38             | 166.88             |
| A_68_P20241613 | chr1:55463553-55463597                            | NM_00114663:785        | Plel1         | INSIDE                 | 0.390                                                        | 0.622                          | 819.18             | 509.57             | 0.243                          | 692.34             | 168.12             |
| A_68_P27841333 | chr11:59990255-59990299                           | NM_001037764:36693     | Rai1          | INSIDE                 | 0.390                                                        | 0.377                          | 1620.98            | 611.52             | 0.147                          | 1174.81            | 172.69             |
| A_68_P21762361 | chr2:154616920-154616964                          | NM_001139511:97        | Raly          | INSIDE                 | 0.390                                                        | 0.495                          | 1287.23            | 637.07             | 0.193                          | 1030.27            | 199.03             |
| A_68_P27971294 | chr11:83223607-83223651                           | NM_001013386:55        | Rasl10b       | INSIDE                 | 0.390                                                        | 0.597                          | 1329.78            | 794.26             | 0.233                          | 967.02             | 225.31             |
| A_68_P22400156 | chr3:105762584-105762628                          | NM_027432:191          | Wdr77         | INSIDE                 | 0.390                                                        | 0.258                          | 3120.47            | 803.89             | 0.100                          | 2417.29            | 242.77             |
| A_68_P26065123 | chr8:94880083-94880127                            | NR_033641:-85          | 4933436C20Rik | DIVERGENT_PROMOTER     | 0.389                                                        | 1.413                          | 1248.29            | 1763.93            | 0.550                          | 857.60             | 471.77             |
| A_68_P27958470 | chr11:80965747-80965791                           | NM_007384:637          | Acen1         | INSIDE                 | 0.389                                                        | 0.643                          | 2651.27            | 1705.25            | 0.250                          | 2029.90            | 507.65             |
| A_68_P23609440 | chr5:37139337-37139381                            | NM_133724:560          | Cno           | INSIDE                 | 0.389                                                        | 0.426                          | 1673.18            | 712.55             | 0.166                          | 1430.27            | 236.80             |
| A_68_P28143424 | chr11:113544952-113544996                         | NM_138598:491          | D11Wsu99e     | INSIDE                 | 0.389                                                        | 0.525                          | 2517.62            | 1321.72            | 0.204                          | 2111.80            | 431.46             |
| A_68_P30981933 | chr16:94747960-94748013                           | NM_007834:250          | Dscr3         | INSIDE                 | 0.389                                                        | 0.617                          | 1236.96            | 762.84             | 0.240                          | 982.57             | 235.93             |
| A_68_P22448211 | chr3:115955166-115955210                          | NM_022427:1214         | Gpr88         | INSIDE                 | 0.389                                                        | 0.610                          | 909.64             | 554.72             | 0.237                          | 837.06             | 198.43             |
| A_68_P27833729 | chr11:58768398-58768446                           | NM_178218:236          | Hist3h2a      | INSIDE                 | 0.389                                                        | 0.527                          | 1602.94            | 844.67             | 0.205                          | 1168.73            | 239.53             |
| A_68_P28290821 | chr12:25335787-25335837                           | NM_178357:-423         | Klfl1         | PROMOTER               | 0.389                                                        | 0.533                          | 1034.45            | 551.52             | 0.207                          | 785.97             | 162.93             |
| A_68_P27470613 | chr10:115024518-115024562                         | NM_010195:296          | Lgr5          | INSIDE                 | 0.389                                                        | 0.548                          | 1972.97            | 1081.22            | 0.213                          | 1512.60            | 322.24             |
| A_68_P23972003 | chr5:108877737-108877781                          | NM_172883:152          | Mfsd7a        | INSIDE                 | 0.389                                                        | 1.422                          | 4663.32            | 6629.61            | 0.553                          | 3380.56            | 1869.85            |
| A_68_P23985662 | chr5:111847249-111847293                          | NM_001081235:85        | Mn1           | INSIDE                 | 0.389                                                        | 0.733                          | 1915.89            | 1404.16            | 0.285                          | 1480.94            | 422.52             |
| A_68_P24009561 | chr5:115886828-115886872                          | NM_008629:7157         | Msi1          | INSIDE                 | 0.389                                                        | 0.420                          | 1710.15            | 717.48             | 0.163                          | 1361.24            | 222.06             |
| A_68_P27889080 | chr11:68198460-68198504                           | NM_008744:1846         | Ntn1          | INSIDE                 | 0.389                                                        | 0.596                          | 1947.38            | 1160.66            | 0.232                          | 1552.36            | 359.66             |
| A_68_P23308589 | chr4:131393487-131393532                          | NM_001083119:684       | Ptpru         | INSIDE                 | 0.389                                                        | 1.782                          | 9005.35            | 16046.43           | 0.693                          | 5751.07            | 3988.01            |
| A_68_P25617012 | chr8:4275589-4275633                              | NM_011592:295          | Timm44        | INSIDE                 | 0.389                                                        | 0.352                          | 1784.11            | 628.53             | 0.137                          | 1462.47            | 200.17             |
| A_68_P21765252 | chr2:155208027-155208072                          | NM_178111:458          | Trp53inp2     | INSIDE                 | 0.389                                                        | 0.631                          | 1550.89            | 978.36             | 0.246                          | 1258.39            | 309.06             |
| A_68_P24972904 | chr7:13365807-13365851                            | NM_001017955:-4821     | Zscan18       | PROMOTER               | 0.389                                                        | 0.658                          | 2850.42            | 1874.64            | 0.256                          | 2132.69            | 545.96             |
| A_68_P27889191 | chr11:68213826-68213870                           | ENSMUST00000108674:477 |               | INSIDE                 | 0.389                                                        | 0.695                          | 3044.74            | 2116.51            | 0.270                          | 2024.29            | 547.54             |
| A_68_P29940453 | chr14:119105644-119105689                         | NM_001033336:-225      | Abcc4         | PROMOTER               | 0.388                                                        | 0.553                          | 937.89             | 518.53             | 0.215                          | 799.90             | 171.59             |
| A_68_P32094198 | chr19:37248988-37249032                           | NM_198300:32773        | Cpeb3         | INSIDE                 | 0.388                                                        | 0.743                          | 3061.68            | 2274.48            | 0.288                          | 2444.14            | 704.83             |
| A_68_P23270847 | chr4:124559714-124559758                          | NM_177671:708          | Epha10        | INSIDE                 | 0.388                                                        | 0.609                          | 2152.03            | 1311.03            | 0.237                          | 1656.04            | 391.91             |
| A_68_P23539568 | chr5:23536418-23536462                            | NM_053090:61           | Fam126a       | INSIDE                 | 0.388                                                        | 0.364                          | 2141.71            | 779.58             | 0.141                          | 1832.65            | 259.00             |
| A_68_P28079561 | chr11:102299305-102299349                         | NM_199200:9651         | Fam171a2      | INSIDE                 | 0.388                                                        | 0.678                          | 1299.25            | 880.31             | 0.263                          | 929.75             | 244.30             |
| A_68_P30501058 | chr15:102797076-102797125                         | NM_010462:-126         | Hoxc10        | PROMOTER               | 0.388                                                        | 0.430                          | 1419.27            | 610.74             | 0.167                          | 969.49             | 161.89             |
| A_68_P29445595 | chr14:21000753-21000797                           | NM_021542:230          | Kenk5         | INSIDE                 | 0.388                                                        | 0.502                          | 1115.45            | 560.30             | 0.195                          | 1023.65            | 199.39             |
| A_68_P26075859 | chr8:96696623-96696667                            | NM_008630:127          | Mt2           | INSIDE                 | 0.388                                                        | 0.556                          | 1281.29            | 712.61             | 0.216                          | 1053.10            | 227.32             |

| ProbeName      | Target position of probe on CpG island microarray | TargetID          | GeneSymbol    | CpG island Description | Ratio of relative methylation (TiO <sub>2</sub> -NP/Vehicle) | Sham group                     |                    |                    | TiO <sub>2</sub> -H group      |                    |                    |
|----------------|---------------------------------------------------|-------------------|---------------|------------------------|--------------------------------------------------------------|--------------------------------|--------------------|--------------------|--------------------------------|--------------------|--------------------|
|                |                                                   |                   |               |                        |                                                              | Relative methylation (Cy5/Cy3) | Cy3 signal (Input) | Cy5 signal (MeDIP) | Relative methylation (Cy5/Cy3) | Cy3 signal (Input) | Cy5 signal (MeDIP) |
| A_68_P31041951 | chr17:11033242-11033286                           | NM_016694:15      | Park2         | INSIDE                 | 0.388                                                        | 0.416                          | 1724.79            | 716.92             | 0.161                          | 1429.97            | 230.49             |
| A_68_P21818226 | chr2:164323071-164323115                          | NM_133779:68      | Pigt          | INSIDE                 | 0.388                                                        | 0.636                          | 1906.00            | 1212.07            | 0.247                          | 1528.24            | 377.07             |
| A_68_P21637464 | chr2:131735522-131735570                          | NM_011170:-117    | Pmp           | PROMOTER               | 0.388                                                        | 0.723                          | 1662.95            | 1202.84            | 0.280                          | 1338.97            | 375.41             |
| A_68_P28107297 | chr11:107340918-107340962                         | NM_025894:99      | Psmid12       | INSIDE                 | 0.388                                                        | 0.458                          | 2343.59            | 1072.77            | 0.178                          | 1712.82            | 304.09             |
| A_68_P27943491 | chr11:78279298-78279342                           | NM_026740:118     | Slc46a1       | INSIDE                 | 0.388                                                        | 0.632                          | 956.21             | 604.78             | 0.245                          | 777.95             | 190.79             |
| A_68_P32136713 | chr19:45218072-45218116                           | NM_021901:-7110   | Ttk1          | PROMOTER               | 0.388                                                        | 0.621                          | 874.63             | 543.49             | 0.241                          | 668.88             | 161.26             |
| A_68_P28614747 | chr12:88540890-88540934                           | NM_001033475:267  | Tmed8         | INSIDE                 | 0.388                                                        | 0.434                          | 1256.05            | 544.69             | 0.168                          | 968.60             | 163.07             |
| A_68_P26809359 | chr9:107436884-107436928                          | NM_019704:631     | Tmem115       | INSIDE                 | 0.388                                                        | 0.468                          | 1517.33            | 710.48             | 0.182                          | 1120.49            | 203.73             |
| A_68_P20937462 | chr1:193150005-193150049                          | NM_025864:183     | Tmem206       | INSIDE                 | 0.388                                                        | 0.710                          | 2924.08            | 2076.58            | 0.276                          | 2035.80            | 561.01             |
| A_68_P29117520 | chr13:69878183-69878227                           | NM_001145162:571  | Ube2q11       | INSIDE                 | 0.388                                                        | 0.642                          | 1526.90            | 979.63             | 0.249                          | 1303.06            | 324.09             |
| A_68_P31092534 | chr17:23729724-23729768                           | NM_011747:6708    | Zfp13         | INSIDE                 | 0.388                                                        | 0.519                          | 1338.86            | 695.11             | 0.201                          | 1137.36            | 229.06             |
| A_68_P32007549 | chr19:21727415-21727459                           | NM_025423:-155    | 1110059E24Rik | DIVERGENT_PROMOTER     | 0.387                                                        | 0.465                          | 1153.75            | 536.60             | 0.180                          | 781.26             | 140.74             |
| A_68_P28314428 | chr12:29360059-29360103                           | NM_134052:9       | Adi1          | INSIDE                 | 0.387                                                        | 0.510                          | 2484.60            | 1267.06            | 0.197                          | 1921.23            | 379.24             |
| A_68_P32795520 | chrX:160347620-160347664                          | NM_026887:551     | Ap1s2         | INSIDE                 | 0.387                                                        | 1.410                          | 2493.78            | 3516.61            | 0.546                          | 1204.55            | 657.69             |
| A_68_P21611139 | chr2:126834542-126834586                          | NM_175550:118     | Ap4e1         | INSIDE                 | 0.387                                                        | 0.559                          | 2168.56            | 1211.45            | 0.216                          | 1837.20            | 397.00             |
| A_68_P25587959 | chr7:148480560-148480604                          | NM_007878:2678    | Drd4          | INSIDE                 | 0.387                                                        | 0.495                          | 1097.57            | 543.76             | 0.192                          | 917.90             | 175.85             |
| A_68_P22702206 | chr4:5571678-5571722                              | NM_173426:375     | Fam110b       | INSIDE                 | 0.387                                                        | 0.654                          | 1996.63            | 1304.95            | 0.253                          | 1615.37            | 408.64             |
| A_68_P32386814 | chrX:50622922-50622968                            | NM_001166365:38   | Fam122b       | INSIDE                 | 0.387                                                        | 3.956                          | 2049.73            | 8109.44            | 1.532                          | 750.92             | 1150.54            |
| A_68_P25125435 | chr7:59117580-59117624                            | NM_001115087:35   | Fanef         | INSIDE                 | 0.387                                                        | 0.389                          | 1514.68            | 589.37             | 0.151                          | 1241.29            | 186.88             |
| A_68_P27897170 | chr11:69615173-69615217                           | NM_010198:-67     | Fgfl1         | PROMOTER               | 0.387                                                        | 0.494                          | 1422.97            | 703.22             | 0.191                          | 1141.34            | 218.27             |
| A_68_P22291215 | chr3:84284164-84284208                            | NM_001205355:-773 | Fhdc1         | PROMOTER               | 0.387                                                        | 0.475                          | 3144.88            | 1494.82            | 0.184                          | 2494.26            | 458.70             |
| A_68_P21569058 | chr2:119151824-119151868                          | NR_030683:87      | Gm14207       | INSIDE                 | 0.387                                                        | 0.398                          | 1735.41            | 690.56             | 0.154                          | 1256.20            | 193.45             |
| A_68_P29613102 | chr14:55196396-55196440                           | NM_010590:80      | Jub           | INSIDE                 | 0.387                                                        | 0.605                          | 1082.21            | 654.80             | 0.234                          | 895.45             | 209.49             |
| A_68_P29696147 | chr14:70008844-70008888                           | NM_033325:-416    | Loxl2         | PROMOTER               | 0.387                                                        | 1.695                          | 4811.56            | 8155.31            | 0.656                          | 3027.77            | 1985.36            |
| A_68_P26233415 | chr8:124967303-124967347                          | NM_138656:-2      | Mvd           | PROMOTER               | 0.387                                                        | 0.650                          | 1192.88            | 775.28             | 0.251                          | 953.11             | 239.48             |
| A_68_P32147202 | chr19:47090004-47090048                           | NM_001164363:-347 | Nt5c2         | PROMOTER               | 0.387                                                        | 0.484                          | 1367.29            | 661.09             | 0.187                          | 1103.59            | 206.66             |
| A_68_P31626368 | chr18:37121882-37121926                           | NM_007767:-5505   | Pcdha6        | PROMOTER               | 0.387                                                        | 1.503                          | 820.70             | 1233.71            | 0.582                          | 675.98             | 393.51             |
| A_68_P23351038 | chr4:138866454-138866498                          | NM_145384:139     | Pqle2         | INSIDE                 | 0.387                                                        | 0.613                          | 1241.01            | 761.20             | 0.237                          | 955.93             | 226.87             |
| A_68_P22346028 | chr3:95659528-95659572                            | NM_027541:126     | Prpf3         | INSIDE                 | 0.387                                                        | 0.590                          | 2572.21            | 1516.67            | 0.228                          | 1976.81            | 451.55             |
| A_68_P29502939 | chr14:30781960-30782004                           | NM_019979:417     | Selk          | INSIDE                 | 0.387                                                        | 0.457                          | 1368.15            | 625.57             | 0.177                          | 965.93             | 170.93             |
| A_68_P22200380 | chr3:65331656-65331707                            | NM_178892:-687    | Tiparp        | PROMOTER               | 0.387                                                        | 0.468                          | 1309.30            | 612.30             | 0.181                          | 1067.33            | 193.00             |
| A_68_P30356632 | chr15:77759535-77759579                           | NM_019913:-132    | Txn2          | PROMOTER               | 0.387                                                        | 0.738                          | 4818.93            | 3558.05            | 0.286                          | 3258.39            | 931.89             |
| A_68_P20827836 | chr1:173341700-173341744                          | NM_009480:-89     | Usf1          | PROMOTER               | 0.387                                                        | 0.638                          | 846.99             | 540.07             | 0.247                          | 766.48             | 189.14             |
| A_68_P26721618 | chr9:91273756-91273800                            | NM_009576-9969    | Zic4          | INSIDE                 | 0.387                                                        | 0.678                          | 1231.49            | 835.37             | 0.263                          | 838.63             | 220.15             |
| A_68_P23283385 | chr4:126738210-126738254                          | NM_026670:144     | Zmym1         | INSIDE                 | 0.387                                                        | 0.361                          | 2545.42            | 917.71             | 0.139                          | 2042.09            | 284.75             |
| A_68_P28178207 | chr11:119352476-119352520                         | NM_001164636:-162 | A730011L01Rik | PROMOTER               | 0.386                                                        | 0.699                          | 1368.51            | 957.09             | 0.270                          | 1069.81            | 288.84             |
| A_68_P27508738 | chr10:121886239-121886283                         | NM_016847:706     | Avpr1a        | INSIDE                 | 0.386                                                        | 0.565                          | 1135.31            | 641.21             | 0.218                          | 868.95             | 189.68             |
| A_68_P23259659 | chr4:122562951-122562995                          | NM_007598:152     | Cap1          | INSIDE                 | 0.386                                                        | 0.563                          | 1933.48            | 1087.93            | 0.217                          | 1356.49            | 294.41             |
| A_68_P23196912 | chr4:108293003-108293049                          | NM_177045:466     | Ce2d1b        | INSIDE                 | 0.386                                                        | 0.559                          | 1352.55            | 755.60             | 0.215                          | 918.88             | 197.95             |
| A_68_P26790784 | chr9:104164628-104164672                          | NM_001163026:610  | Dnajc13       | INSIDE                 | 0.386                                                        | 0.701                          | 1651.99            | 1157.73            | 0.270                          | 1188.76            | 321.22             |
| A_68_P28155820 | chr11:115719994-115720038                         | NM_145438:34645   | Ligl2         | DOWNSTREAM             | 0.386                                                        | 0.695                          | 1326.79            | 922.46             | 0.268                          | 1040.21            | 279.24             |
| A_68_P21122748 | chr2:33495093-33495137                            | NM_010725:917     | Lmx1b         | INSIDE                 | 0.386                                                        | 0.530                          | 1146.85            | 607.31             | 0.204                          | 857.04             | 175.20             |
| A_68_P22301529 | chr3:86028379-86028423                            | NM_001077687:-211 | Lrba          | PROMOTER               | 0.386                                                        | 0.501                          | 2111.14            | 1058.28            | 0.193                          | 1730.67            | 334.87             |
| A_68_P29512324 | chr14:32307722-32307766                           | NM_025907:419     | Mettl6        | INSIDE                 | 0.386                                                        | 0.405                          | 1352.21            | 548.05             | 0.157                          | 1069.13            | 167.34             |
| A_68_P21350014 | chr2:76244191-76244236                            | NM_145525:-381    | Osbpl6        | PROMOTER               | 0.386                                                        | 0.500                          | 1498.18            | 748.41             | 0.193                          | 1241.20            | 239.14             |
| A_68_P31066337 | chr17:15701209-15701253                           | NM_144809:-943    | Prdm9         | PROMOTER               | 0.386                                                        | 0.448                          | 1781.88            | 799.01             | 0.173                          | 1543.38            | 266.84             |
| A_68_P31311919 | chr17:67703480-67703524                           | NM_008984:297     | Ptprrn        | INSIDE                 | 0.386                                                        | 0.444                          | 1802.80            | 799.88             | 0.171                          | 1378.61            | 235.92             |
| A_68_P28291147 | chr12:25393381-25393425                           | NM_009104:284     | Rrm2          | INSIDE                 | 0.386                                                        | 0.626                          | 2599.15            | 1627.70            | 0.242                          | 1944.45            | 469.87             |
| A_68_P32116948 | chr19:41817676-41817720                           | NM_015748:648     | Slit1         | INSIDE                 | 0.386                                                        | 0.671                          | 4698.14            | 3152.91            | 0.259                          | 3613.87            | 936.75             |
| A_68_P20191545 | chr1:43990635-43990679                            | NM_009418:-195    | Tpp2          | PROMOTER               | 0.386                                                        | 0.587                          | 1071.02            | 628.56             | 0.226                          | 849.56             | 192.28             |
| A_68_P21579903 | chr2:121096750-121096794                          | NM_013735:350     | Trp53bp1      | INSIDE                 | 0.386                                                        | 1.499                          | 10760.68           | 16131.09           | 0.578                          | 7597.34            | 4390.72            |

| ProbeName      | Target position of probe on CpG island microarray | TargetID          | GeneSymbol    | CpG island Description | Ratio of relative methylation (TiO <sub>2</sub> -NP/Vehicle) | Sham group                     |                    |                    | TiO <sub>2</sub> -H group      |                    |                    |
|----------------|---------------------------------------------------|-------------------|---------------|------------------------|--------------------------------------------------------------|--------------------------------|--------------------|--------------------|--------------------------------|--------------------|--------------------|
|                |                                                   |                   |               |                        |                                                              | Relative methylation (Cy5/Cy3) | Cy3 signal (Input) | Cy5 signal (MeDIP) | Relative methylation (Cy5/Cy3) | Cy3 signal (Input) | Cy5 signal (MeDIP) |
| A_68_P22650340 | chr3:152059616-152059660                          | NM_198416:-19     | Zzz3          | PROMOTER               | 0.386                                                        | 0.628                          | 997.79             | 626.69             | 0.242                          | 807.48             | 195.68             |
| A_68_P24973684 | chr7:13513821-13513865                            | NM_029809:1078    | 2310014L17Rik | INSIDE                 | 0.385                                                        | 1.494                          | 1749.65            | 2614.53            | 0.576                          | 1454.10            | 837.63             |
| A_68_P21072311 | chr2:25316393-25316437                            | NM_153557:200     | BC029214      | INSIDE                 | 0.385                                                        | 0.633                          | 2621.56            | 1659.14            | 0.244                          | 1888.00            | 460.39             |
| A_68_P23607907 | chr5:36827498-36827542                            | NM_025725:284     | Ccdc96        | INSIDE                 | 0.385                                                        | 0.615                          | 1350.55            | 830.38             | 0.236                          | 1084.30            | 256.36             |
| A_68_P27921507 | chr11:74433104-74433148                           | NM_001013784:20   | E130309D14Rik | INSIDE                 | 0.385                                                        | 0.588                          | 2126.36            | 1249.32            | 0.226                          | 1752.37            | 396.42             |
| A_68_P21603035 | chr2:125331152-125331196                          | NM_007993:1000    | Fbn1          | INSIDE                 | 0.385                                                        | 0.407                          | 1662.11            | 676.94             | 0.157                          | 1295.90            | 203.23             |
| A_68_P21727937 | chr2:147874425-147874470                          | NM_010446:-1742   | Foxa2         | PROMOTER               | 0.385                                                        | 0.672                          | 1303.99            | 875.82             | 0.258                          | 1089.74            | 281.64             |
| A_68_P30596435 | chr16:22163008-22163052                           | NM_183029:342     | Igf2bp2       | INSIDE                 | 0.385                                                        | 0.488                          | 2271.92            | 1109.15            | 0.188                          | 1725.01            | 324.49             |
| A_68_P26546364 | chr9:58049788-58049832                            | NM_001161540:-204 | Islr2         | PROMOTER               | 0.385                                                        | 1.676                          | 3041.84            | 5098.28            | 0.646                          | 2084.52            | 1346.23            |
| A_68_P30483165 | chr15:99803409-99803453                           | NM_001024526:220  | Larp4         | INSIDE                 | 0.385                                                        | 0.684                          | 2794.77            | 1912.37            | 0.263                          | 2103.85            | 553.97             |
| A_68_P30513214 | chr16:5013320-5013364                             | NM_133185:304     | Rogdi         | INSIDE                 | 0.385                                                        | 0.715                          | 2269.83            | 1622.83            | 0.275                          | 1581.98            | 435.04             |
| A_68_P31841966 | chr18:76400802-76400846                           | NM_010754:-754    | Smad2         | PROMOTER               | 0.385                                                        | 0.482                          | 2841.35            | 1370.16            | 0.186                          | 2146.79            | 399.04             |
| A_68_P30502555 | chr15:102999581-102999625                         | NM_027885:-5887   | Smug1         | PROMOTER               | 0.385                                                        | 0.569                          | 3410.54            | 1941.02            | 0.219                          | 2647.80            | 580.82             |
| A_68_P25958201 | chr8:74195222-74195266                            | NM_001029873:412  | Unc13a        | INSIDE                 | 0.385                                                        | 0.429                          | 1736.62            | 744.39             | 0.165                          | 1310.45            | 216.39             |
| A_68_P26024223 | chr8:87823249-87823293                            | NM_022997:126     | Vps35         | INSIDE                 | 0.385                                                        | 0.705                          | 4010.05            | 2828.26            | 0.271                          | 3021.53            | 820.03             |
| A_68_P24648066 | chr6:92893011-92893055                            | NR_015530:2457    | 9530026P05Rik | INSIDE                 | 0.384                                                        | 0.659                          | 1940.02            | 1277.78            | 0.253                          | 1367.67            | 346.12             |
| A_68_P25354431 | chr7:105343001-105343045                          | NM_001081167:4963 | B3gnt6        | INSIDE                 | 0.384                                                        | 0.645                          | 1620.36            | 1045.61            | 0.248                          | 1423.85            | 352.46             |
| A_68_P25409556 | chr7:116847071-116847115                          | NM_020616:-158    | D930014E17Rik | PROMOTER               | 0.384                                                        | 0.502                          | 2548.77            | 1279.57            | 0.193                          | 1928.95            | 371.99             |
| A_68_P26157751 | chr8:112089473-112089517                          | NM_178380:7       | Dhx38         | INSIDE                 | 0.384                                                        | 0.599                          | 2610.74            | 1564.85            | 0.230                          | 1737.08            | 399.73             |
| A_68_P25637620 | chr8:8661042-8661086                              | NM_010111:-291    | Efnb2         | PROMOTER               | 0.384                                                        | 0.429                          | 1357.65            | 581.82             | 0.165                          | 1001.31            | 164.86             |
| A_68_P28788493 | chr13:3537834-3537878                             | NM_008112:536     | Gdi2          | INSIDE                 | 0.384                                                        | 0.541                          | 1387.53            | 751.02             | 0.208                          | 1088.91            | 226.22             |
| A_68_P20451402 | chr1:94728781-94728825                            | NM_016696:540     | Gpc1          | INSIDE                 | 0.384                                                        | 0.399                          | 3973.72            | 1585.15            | 0.153                          | 3108.58            | 475.88             |
| A_68_P22565473 | chr3:137528589-137528633                          | NM_016750:1048    | H2afz         | INSIDE                 | 0.384                                                        | 0.459                          | 1411.87            | 647.69             | 0.176                          | 1140.22            | 200.77             |
| A_68_P28041913 | chr11:95866656-95866701                           | NM_009951:580     | Igf2bp1       | INSIDE                 | 0.384                                                        | 0.502                          | 1598.54            | 802.29             | 0.193                          | 1273.94            | 245.79             |
| A_68_P27927255 | chr11:75444500-75444544                           | NM_008916:1       | Inpp5k        | INSIDE                 | 0.384                                                        | 0.649                          | 799.68             | 519.12             | 0.249                          | 623.68             | 155.52             |
| A_68_P25727984 | chr8:26707935-26707980                            | NM_173012:2       | Letm2         | INSIDE                 | 0.384                                                        | 0.742                          | 5217.74            | 3873.84            | 0.285                          | 3736.09            | 1064.50            |
| A_68_P22180929 | chr3:60807059-60807103                            | NM_008772:364     | P2ry1         | INSIDE                 | 0.384                                                        | 0.717                          | 2585.02            | 1852.22            | 0.275                          | 2083.51            | 573.97             |
| A_68_P20184676 | chr1:42754950-42754994                            | NM_008900:982     | Pou3f3        | INSIDE                 | 0.384                                                        | 0.530                          | 1020.23            | 540.91             | 0.204                          | 815.91             | 166.23             |
| A_68_P31921665 | chr19:4191850-4191903                             | NM_031868:-297    | Ppp1ca        | DIVERGENT_PROMOTER     | 0.384                                                        | 0.618                          | 906.79             | 560.73             | 0.238                          | 670.71             | 159.33             |
| A_68_P31925257 | chr19:4811827-4811871                             | NM_019869:-214    | Rbm14         | PROMOTER               | 0.384                                                        | 0.487                          | 1962.26            | 954.80             | 0.187                          | 1835.14            | 342.81             |
| A_68_P32135692 | chr19:45063608-45063652                           | NM_011976:-203    | Sema4g        | PROMOTER               | 0.384                                                        | 0.700                          | 3727.06            | 2609.07            | 0.269                          | 2764.75            | 742.89             |
| A_68_P28555630 | chr12:77811318-77811362                           | NM_013675:194     | Spnb1         | INSIDE                 | 0.384                                                        | 0.669                          | 1808.55            | 1209.90            | 0.257                          | 1421.57            | 365.08             |
| A_68_P26804665 | chr9:106588204-106588248                          | NM_011573:-228    | Tex264        | PROMOTER               | 0.384                                                        | 0.535                          | 3120.21            | 1668.26            | 0.205                          | 2397.02            | 492.12             |
| A_68_P31140216 | chr17:31649029-31649073                           | NM_021322:382     | Wdr4          | INSIDE                 | 0.384                                                        | 0.655                          | 1367.68            | 895.97             | 0.252                          | 1170.53            | 294.66             |
| A_68_P28931387 | chr13:32894954-32894998                           | NM_030215:1078    | Wrnip1        | INSIDE                 | 0.384                                                        | 0.617                          | 1980.72            | 1221.55            | 0.237                          | 1549.04            | 367.09             |
| A_68_P21622286 | chr2:128793161-128793205                          | NM_178404:45      | Zc3h6         | INSIDE                 | 0.384                                                        | 0.683                          | 1457.58            | 995.55             | 0.262                          | 1061.84            | 278.46             |
| A_68_P26349728 | chr9:21760084-21760135                            | NM_025870:-87     | 2310047B19Rik | PROMOTER               | 0.383                                                        | 0.671                          | 975.05             | 654.41             | 0.257                          | 709.65             | 182.60             |
| A_68_P22407409 | chr3:107399162-107399206                          | NM_007441:1236    | Aix3          | INSIDE                 | 0.383                                                        | 0.530                          | 2117.75            | 1122.27            | 0.203                          | 1486.17            | 301.27             |
| A_68_P32364050 | chrX:45697107-45697151                            | NM_178782:2594    | Bcor1l        | INSIDE                 | 0.383                                                        | 9.469                          | 12523.37           | 118577.60          | 3.626                          | 5339.78            | 19361.94           |
| A_68_P28959945 | chr13:38437436-38437480                           | NM_007556:-126    | Bmp6          | PROMOTER               | 0.383                                                        | 0.657                          | 1024.36            | 673.30             | 0.252                          | 703.83             | 177.12             |
| A_68_P20456912 | chr1:95582245-95582289                            | NM_016778:-4      | Bok           | PROMOTER               | 0.383                                                        | 0.511                          | 1064.21            | 543.39             | 0.196                          | 812.05             | 158.91             |
| A_68_P31001857 | chr16:98143725-98143769                           | NM_174847:497     | C2cd2         | INSIDE                 | 0.383                                                        | 0.689                          | 1211.64            | 834.54             | 0.264                          | 935.34             | 246.86             |
| A_68_P28331599 | chr12:32184853-32184897                           | NM_134048:-469    | Cbl1l         | PROMOTER               | 0.383                                                        | 0.648                          | 1114.88            | 722.24             | 0.248                          | 898.13             | 223.06             |
| A_68_P23271162 | chr4:124614141-124614185                          | NM_026560:-1      | Cdca8         | DIVERGENT_PROMOTER     | 0.383                                                        | 0.554                          | 1874.20            | 1038.39            | 0.212                          | 1341.22            | 284.79             |
| A_68_P25957393 | chr8:74067094-74067138                            | NM_028617:288     | Fam125a       | INSIDE                 | 0.383                                                        | 0.717                          | 2146.50            | 1538.78            | 0.274                          | 1662.90            | 456.22             |
| A_68_P25307421 | chr7:96553016-96553060                            | NM_008055:163     | Fzd4          | INSIDE                 | 0.383                                                        | 0.416                          | 2360.05            | 981.14             | 0.159                          | 1688.85            | 269.13             |
| A_68_P28032111 | chr11:94183206-94183250                           | NM_026313:-3      | Luc7l3        | DIVERGENT_PROMOTER     | 0.383                                                        | 0.581                          | 1257.23            | 730.56             | 0.223                          | 890.55             | 198.18             |
| A_68_P25756476 | chr8:32278992-32279036                            | NM_026453:182     | Mak16         | INSIDE                 | 0.383                                                        | 0.614                          | 1140.32            | 699.86             | 0.235                          | 959.02             | 225.20             |
| A_68_P29011119 | chr13:47110041-47110085                           | NM_175340:157     | Nhlrc1        | INSIDE                 | 0.383                                                        | 0.608                          | 5479.66            | 3332.96            | 0.233                          | 4146.81            | 966.73             |
| A_68_P29055509 | chr13:55614601-55614645                           | NM_001114088:178  | Pdlim7        | INSIDE                 | 0.383                                                        | 0.398                          | 3015.47            | 1199.10            | 0.152                          | 2314.74            | 352.41             |
| A_68_P27277400 | chr10:78996361-78996405                           | NM_015817:150     | Ppap2c        | INSIDE                 | 0.383                                                        | 1.507                          | 11061.78           | 16667.18           | 0.577                          | 7272.18            | 4196.60            |

| ProbeName      | Target position of probe on CpG island microarray | TargetID                 | GeneSymbol    | CpG island Description | Ratio of relative methylation (TiO <sub>2</sub> -NP/Vehicle) | Sham group                     |                    |                    | TiO <sub>2</sub> -H group      |                    |                    |
|----------------|---------------------------------------------------|--------------------------|---------------|------------------------|--------------------------------------------------------------|--------------------------------|--------------------|--------------------|--------------------------------|--------------------|--------------------|
|                |                                                   |                          |               |                        |                                                              | Relative methylation (Cy5/Cy3) | Cy3 signal (Input) | Cy5 signal (MeDIP) | Relative methylation (Cy5/Cy3) | Cy3 signal (Input) | Cy5 signal (MeDIP) |
| A_68_P24447786 | chr6:51962237-51962281                            | NM_018773:290            | Skap2         | INSIDE                 | 0.383                                                        | 0.510                          | 1892.49            | 965.77             | 0.195                          | 1579.61            | 308.51             |
| A_68_P24974127 | chr7:13595301-13595345                            | NM_001024699:-173        | Zbtb45        | PROMOTER               | 0.383                                                        | 0.567                          | 2246.83            | 1274.90            | 0.217                          | 1400.51            | 304.31             |
| A_68_P28712206 | chr12:107201465-107201509                         | BC156654:163626          |               | INSIDE                 | 0.383                                                        | 0.533                          | 1030.53            | 549.68             | 0.204                          | 761.18             | 155.41             |
| A_68_P30421913 | chr15:88721305-88721349                           | ENSMUST00000172019:63522 |               | INSIDE                 | 0.383                                                        | 0.627                          | 4361.14            | 2732.63            | 0.240                          | 3076.36            | 738.59             |
| A_68_P25668725 | chr8:13494426-13494470                            | NM_019521:87             | Gas6          | INSIDE                 | 0.382                                                        | 0.445                          | 3011.25            | 1340.42            | 0.170                          | 2228.70            | 379.31             |
| A_68_P28152427 | chr11:115128177-115128221                         | NM_010350:359            | Grin2c        | INSIDE                 | 0.382                                                        | 0.620                          | 2404.14            | 1491.55            | 0.237                          | 1860.09            | 440.44             |
| A_68_P29725078 | chr14:75347229-75347273                           | NM_001033439:434         | Lrch1         | INSIDE                 | 0.382                                                        | 0.517                          | 1295.66            | 669.60             | 0.198                          | 1038.95            | 205.20             |
| A_68_P20348983 | chr1:74552547-74552591                            | NM_021383:-65            | Rqcd1         | PROMOTER               | 0.382                                                        | 0.440                          | 3658.22            | 1610.76            | 0.168                          | 2627.28            | 441.91             |
| A_68_P27280974 | chr10:79564978-79565022                           | NM_183426:447            | Sbno2         | INSIDE                 | 0.382                                                        | 1.813                          | 2958.89            | 5365.60            | 0.692                          | 2160.66            | 1494.97            |
| A_68_P32036092 | chr19:26681843-26681887                           | NM_011416:2215           | Smarca2       | INSIDE                 | 0.382                                                        | 0.738                          | 2246.36            | 1657.71            | 0.282                          | 1648.69            | 464.78             |
| A_68_P31909280 | chr18:89063162-89063206                           | NM_018821:415            | Socs6         | INSIDE                 | 0.382                                                        | 0.706                          | 2132.44            | 1504.63            | 0.269                          | 1772.95            | 477.74             |
| A_68_P25364623 | chr7:107065859-107065903                          | NM_001164258:58153       | Xrra1         | INSIDE                 | 0.382                                                        | 0.552                          | 1279.25            | 705.79             | 0.211                          | 1061.22            | 223.43             |
| A_68_P30369303 | chr15:79763884-79763928                           | NM_144811:-830           | Cbx7          | PROMOTER               | 0.381                                                        | 0.614                          | 1036.84            | 637.03             | 0.234                          | 902.92             | 211.45             |
| A_68_P28396961 | chr12:45311078-45311122                           | NM_013760:-45            | Dnajb9        | PROMOTER               | 0.381                                                        | 0.457                          | 2172.07            | 993.00             | 0.174                          | 1688.94            | 294.02             |
| A_68_P20825266 | chr1:172837419-172837463                          | NM_001029984:5632        | Fer1b         | INSIDE                 | 0.381                                                        | 1.347                          | 2671.36            | 3598.72            | 0.514                          | 2081.09            | 1068.86            |
| A_68_P28083435 | chr11:102978558-102978602                         | NM_138753:942            | Hexim1        | INSIDE                 | 0.381                                                        | 0.654                          | 1619.45            | 1059.54            | 0.249                          | 1327.14            | 331.08             |
| A_68_P27534777 | chr10:126676555-126676599                         | NM_001039000:23843       | Kif5a         | INSIDE                 | 0.381                                                        | 1.451                          | 909.64             | 1320.23            | 0.554                          | 735.03             | 406.86             |
| A_68_P23391035 | chr4:147242398-147242442                          | NM_001025365:408         | Miip          | INSIDE                 | 0.381                                                        | 0.537                          | 1237.13            | 663.77             | 0.204                          | 1010.63            | 206.44             |
| A_68_P30359769 | chr15:78240781-78240825                           | NM_138670:3269           | Mpst          | INSIDE                 | 0.381                                                        | 0.617                          | 1060.37            | 654.13             | 0.235                          | 771.69             | 181.47             |
| A_68_P26268769 | chr8:130881368-130881412                          | NM_008737:-1582          | Nrp1          | PROMOTER               | 0.381                                                        | 0.592                          | 1392.25            | 824.88             | 0.225                          | 1178.98            | 265.85             |
| A_68_P30961955 | chr16:91271343-91271387                           | NM_016968:1351           | Olig1         | INSIDE                 | 0.381                                                        | 0.573                          | 2374.04            | 1361.14            | 0.218                          | 1834.52            | 400.26             |
| A_68_P25370974 | chr7:108160323-108160367                          | NM_008773:161            | P2ry2         | INSIDE                 | 0.381                                                        | 0.573                          | 1520.90            | 870.99             | 0.218                          | 1226.47            | 267.58             |
| A_68_P31713373 | chr18:53622483-53622527                           | NM_001033281:-1695       | Prdm6         | PROMOTER               | 0.381                                                        | 0.623                          | 1481.10            | 922.66             | 0.237                          | 1180.35            | 279.88             |
| A_68_P21762363 | chr2:154617145-154617189                          | NM_00113951:321          | Raly          | INSIDE                 | 0.381                                                        | 0.604                          | 2141.14            | 1293.22            | 0.230                          | 1803.78            | 415.27             |
| A_68_P30979319 | chr16:94085864-94085908                           | NM_011377:382            | Sim2          | INSIDE                 | 0.381                                                        | 0.402                          | 2426.59            | 975.03             | 0.153                          | 1954.83            | 299.27             |
| A_68_P28520026 | chr12:71448401-71448445                           | NM_001110202:179         | Trim9         | INSIDE                 | 0.381                                                        | 0.608                          | 867.71             | 527.28             | 0.232                          | 729.99             | 169.06             |
| A_68_P30592418 | chr16:21423272-21423316                           | NM_001081366:104         | Vps8          | INSIDE                 | 0.381                                                        | 0.490                          | 1413.78            | 693.21             | 0.187                          | 1241.36            | 232.03             |
| A_68_P22413520 | chr3:108394071-108394115                          | NM_181400:-103           | Wdr47         | PROMOTER               | 0.381                                                        | 0.485                          | 1558.91            | 755.65             | 0.185                          | 1300.47            | 240.11             |
| A_68_P31926817 | chr19:5088108-5088153                             | NM_026553:-407           | Yif1a         | DIVERGENT_PROMOTER     | 0.381                                                        | 0.622                          | 1033.89            | 643.35             | 0.237                          | 751.85             | 178.03             |
| A_68_P25827309 | chr8:46024036-46024087                            | AK079043:-3548           |               | PROMOTER               | 0.381                                                        | 0.508                          | 1156.37            | 586.87             | 0.193                          | 855.25             | 165.37             |
| A_68_P27809329 | chr11:54117906-54117950                           | NM_001033597:223         | Acsf6         | INSIDE                 | 0.380                                                        | 0.691                          | 3018.23            | 2086.45            | 0.262                          | 2417.92            | 634.67             |
| A_68_P25010985 | chr7:26412400-26412444                            | NM_001036740:-220        | B3gnt8        | PROMOTER               | 0.380                                                        | 1.663                          | 4751.97            | 7900.87            | 0.632                          | 3194.05            | 2020.21            |
| A_68_P24158346 | chr5:144578888-144578932                          | NM_013557:250            | Eif2ak1       | INSIDE                 | 0.380                                                        | 0.493                          | 3030.88            | 1494.45            | 0.187                          | 2286.94            | 428.01             |
| A_68_P23404992 | chr4:149611119-149611164                          | NM_023119:-164           | Eno1          | PROMOTER               | 0.380                                                        | 0.563                          | 1922.55            | 1081.72            | 0.214                          | 1383.68            | 295.56             |
| A_68_P32026412 | chr19:24971921-24971965                           | NM_008022:3857           | Foxd4         | DOWNSTREAM             | 0.380                                                        | 0.406                          | 1833.59            | 744.71             | 0.154                          | 1366.72            | 210.77             |
| A_68_P27484948 | chr10:117578776-117578823                         | NM_001162904:-43         | Mdm1          | PROMOTER               | 0.380                                                        | 0.638                          | 1123.74            | 716.89             | 0.242                          | 880.61             | 213.36             |
| A_68_P20551218 | chr1:120218342-120218386                          | NM_026472:-55            | Mki67ip       | PROMOTER               | 0.380                                                        | 0.521                          | 1265.95            | 659.71             | 0.198                          | 1035.88            | 204.88             |
| A_68_P28039686 | chr11:95446719-95446763                           | NM_033217:2272           | Ngfr          | INSIDE                 | 0.380                                                        | 0.690                          | 1630.84            | 1125.96            | 0.262                          | 1171.77            | 307.46             |
| A_68_P22727582 | chr4:10935187-10935231                            | NM_175175:-442           | Plekht2       | PROMOTER               | 0.380                                                        | 0.447                          | 1915.38            | 856.58             | 0.170                          | 1445.89            | 245.94             |
| A_68_P25587156 | chr7:148354570-148354614                          | NM_001172101:-7          | Rnh1          | PROMOTER               | 0.380                                                        | 0.629                          | 1970.53            | 1239.78            | 0.239                          | 1596.49            | 381.57             |
| A_68_P21328890 | chr2:72819073-72819117                            | NM_001018042:-591        | Sp3           | PROMOTER               | 0.380                                                        | 0.477                          | 1207.64            | 576.04             | 0.181                          | 1084.35            | 196.48             |
| A_68_P28054167 | chr11:97913713-97913757                           | NM_146028:1042           | Stac2         | INSIDE                 | 0.380                                                        | 0.687                          | 2016.37            | 1385.58            | 0.261                          | 1470.46            | 384.09             |
| A_68_P24786878 | chr6:118405236-118405280                          | NM_028335:266            | Zfp248        | INSIDE                 | 0.380                                                        | 0.605                          | 1310.10            | 791.99             | 0.230                          | 973.42             | 223.41             |
| A_68_P32543330 | chrX:93163948-93164001                            |                          |               | Unknown                | 0.380                                                        | 6.928                          | 2107.39            | 14600.13           | 2.631                          | 781.55             | 2056.51            |
| A_68_P31215873 | chr17:48232887-48232931                           | NM_026625:6327           | 1700067P10Rik | DOWNSTREAM             | 0.379                                                        | 0.730                          | 1820.06            | 1328.36            | 0.277                          | 1416.41            | 391.83             |
| A_68_P27187162 | chr10:62114413-62114457                           | NM_053183:-488           | Ddx50         | PROMOTER               | 0.379                                                        | 0.538                          | 1677.62            | 902.00             | 0.204                          | 1276.68            | 260.05             |
| A_68_P29649840 | chr14:61979049-61979093                           | NM_026598:212            | Ebpl          | INSIDE                 | 0.379                                                        | 0.627                          | 961.94             | 602.95             | 0.238                          | 806.22             | 191.53             |
| A_68_P26761425 | chr9:98855848-98855892                            | NR_003248:-141           | Foxl2os       | DIVERGENT_PROMOTER     | 0.379                                                        | 0.439                          | 1241.13            | 544.51             | 0.166                          | 1052.26            | 175.12             |
| A_68_P25025742 | chr7:29956544-29956588                            | NM_182696:1158           | Ggn           | INSIDE                 | 0.379                                                        | 0.497                          | 1466.17            | 729.41             | 0.189                          | 1024.49            | 193.18             |
| A_68_P21338737 | chr2:74517808-74517856                            | NM_008273:-2617          | Hoxd11        | PROMOTER               | 0.379                                                        | 0.653                          | 1564.43            | 1021.20            | 0.247                          | 1084.94            | 268.44             |
| A_68_P25954140 | chr8:73321012-73321061                            | NM_199308:-4704          | Mast3         | PROMOTER               | 0.379                                                        | 3.708                          | 4916.78            | 18230.35           | 1.407                          | 3289.09            | 4627.57            |

| ProbeName      | Target position of probe on CpG island microarray | TargetID          | GeneSymbol    | CpG island Description | Ratio of relative methylation (TiO <sub>2</sub> -NP/Vehicle) | Sham group                     |                    |                    | TiO <sub>2</sub> -H group      |                    |                    |
|----------------|---------------------------------------------------|-------------------|---------------|------------------------|--------------------------------------------------------------|--------------------------------|--------------------|--------------------|--------------------------------|--------------------|--------------------|
|                |                                                   |                   |               |                        |                                                              | Relative methylation (Cy5/Cy3) | Cy3 signal (Input) | Cy5 signal (MeDIP) | Relative methylation (Cy5/Cy3) | Cy3 signal (Input) | Cy5 signal (MeDIP) |
| A_68_P31400335 | chr17:84105596-84105640                           | NM_001171053:116  | Mta3          | INSIDE                 | 0.379                                                        | 0.340                          | 1941.82            | 660.09             | 0.129                          | 1577.14            | 203.21             |
| A_68_P30344755 | chr15:75724584-75724628                           | NM_172607:305     | Naipr1        | INSIDE                 | 0.379                                                        | 0.701                          | 5491.86            | 3848.68            | 0.265                          | 3965.40            | 1052.51            |
| A_68_P20354543 | chr1:75501853-75501897                            | NM_178884:1153    | Obst1         | INSIDE                 | 0.379                                                        | 0.484                          | 1584.19            | 766.92             | 0.183                          | 1259.54            | 231.06             |
| A_68_P32141864 | chr19:46131303-46131347                           | NM_001081214:296  | Pprc1         | INSIDE                 | 0.379                                                        | 0.651                          | 3419.68            | 2226.53            | 0.247                          | 2531.00            | 624.54             |
| A_68_P25377920 | chr7:109399308-109399352                          | NM_019566:-698    | Rhog          | PROMOTER               | 0.379                                                        | 0.677                          | 2603.19            | 1762.26            | 0.256                          | 1904.52            | 488.06             |
| A_68_P25585273 | chr7:148043403-148043447                          | NM_053194:129     | Ric8          | INSIDE                 | 0.379                                                        | 0.593                          | 1126.28            | 667.47             | 0.224                          | 898.41             | 201.57             |
| A_68_P31154751 | chr17:34741404-34741448                           | NM_019403:-920    | Rnf5          | DIVERGENT_PROMOTER     | 0.379                                                        | 0.539                          | 1148.62            | 619.50             | 0.204                          | 897.67             | 183.55             |
| A_68_P23251106 | chr4:120078426-120078470                          | NM_001159630:563  | Scmh1         | INSIDE                 | 0.379                                                        | 0.600                          | 1674.00            | 1004.47            | 0.227                          | 1603.57            | 364.74             |
| A_68_P27844938 | chr11:60624796-60624840                           | NM_009171:-51     | Shmt1         | PROMOTER               | 0.379                                                        | 0.654                          | 3482.45            | 2278.99            | 0.248                          | 2969.94            | 736.22             |
| A_68_P30464705 | chr15:96471903-96471947                           | NM_134086:469     | Slc38a1       | INSIDE                 | 0.379                                                        | 0.501                          | 1147.95            | 575.10             | 0.190                          | 897.07             | 170.44             |
| A_68_P21745018 | chr2:151457749-151457793                          | NM_198214:499     | SnpH          | INSIDE                 | 0.379                                                        | 0.513                          | 1905.37            | 977.81             | 0.195                          | 1525.99            | 296.87             |
| A_68_P28909015 | chr13:29050121-29050165                           | NM_009238:-4591   | Sox4          | PROMOTER               | 0.379                                                        | 0.568                          | 1790.08            | 1017.56            | 0.216                          | 1321.89            | 285.13             |
| A_68_P23382179 | chr4:144836289-144836333                          | NM_011610:463     | Tnfrsf1b      | INSIDE                 | 0.379                                                        | 0.710                          | 2172.27            | 1541.23            | 0.269                          | 1510.46            | 406.10             |
| A_68_P29260160 | chr13:99660969-99661013                           | NM_001048267:7    | Tnpo1         | INSIDE                 | 0.379                                                        | 0.400                          | 1452.88            | 581.14             | 0.152                          | 1244.49            | 188.74             |
| A_68_P26528457 | chr9:54765090-54765134                            | NM_177351:16      | Agphd1        | INSIDE                 | 0.378                                                        | 0.546                          | 1391.53            | 759.53             | 0.206                          | 1175.08            | 242.26             |
| A_68_P23332636 | chr4:135762606-135762650                          | NM_001008232:349  | Asap3         | INSIDE                 | 0.378                                                        | 0.542                          | 1377.48            | 746.30             | 0.205                          | 1042.38            | 213.43             |
| A_68_P27643056 | chr11:22759939-22759983                           | NM_016888:-225    | B3gnt2        | PROMOTER               | 0.378                                                        | 0.447                          | 1284.53            | 574.01             | 0.169                          | 1059.94            | 178.86             |
| A_68_P28047198 | chr11:96723388-96723432                           | NM_019877:12221   | Cop2          | DOWNSTREAM             | 0.378                                                        | 0.520                          | 2137.91            | 1110.95            | 0.196                          | 1668.77            | 327.66             |
| A_68_P30478214 | chr15:98926989-98927033                           | NM_176835:-2904   | Dnajc22       | DIVERGENT_PROMOTER     | 0.378                                                        | 0.414                          | 1883.76            | 778.97             | 0.156                          | 1542.55            | 241.04             |
| A_68_P32140185 | chr19:45811804-45811848                           | NM_001166361:5548 | Fgf8          | INSIDE                 | 0.378                                                        | 0.518                          | 1130.07            | 584.84             | 0.196                          | 886.64             | 173.41             |
| A_68_P26467268 | chr9:44187370-44187414                            | NM_021395:-180    | Hyou1         | PROMOTER               | 0.378                                                        | 0.624                          | 891.20             | 555.89             | 0.236                          | 721.21             | 170.23             |
| A_68_P25096453 | chr7:53289096-53289140                            | NM_153057:53      | Nomo1         | INSIDE                 | 0.378                                                        | 0.555                          | 1276.68            | 708.95             | 0.210                          | 1041.00            | 218.28             |
| A_68_P32107650 | chr19:40346140-40346184                           | NM_016861:-56     | Pdlim1        | PROMOTER               | 0.378                                                        | 0.425                          | 1347.60            | 572.21             | 0.161                          | 1066.57            | 171.25             |
| A_68_P31254139 | chr17:56278984-56279028                           | NM_013662:-5731   | Sema6b        | PROMOTER               | 0.378                                                        | 0.495                          | 2403.85            | 1190.58            | 0.187                          | 1795.25            | 336.05             |
| A_68_P21266387 | chr2:61643809-61643853                            | NM_009322:1321    | Tbr1          | INSIDE                 | 0.378                                                        | 0.411                          | 3510.27            | 1442.32            | 0.155                          | 2675.82            | 415.74             |
| A_68_P26817223 | chr9:108838835-108838879                          | NM_025407:196     | Uqerc1        | INSIDE                 | 0.378                                                        | 0.569                          | 3102.80            | 1764.39            | 0.215                          | 2284.53            | 491.08             |
| A_68_P25087020 | chr7:51615740-51615784                            | NM_027049:14638   | 1700008003Rik | INSIDE                 | 0.377                                                        | 0.531                          | 1102.21            | 585.73             | 0.200                          | 868.73             | 174.08             |
| A_68_P24104854 | chr5:133019778-133019822                          | NM_177047:-1587   | Auts2         | PROMOTER               | 0.377                                                        | 0.685                          | 3249.49            | 2225.28            | 0.258                          | 2618.90            | 676.35             |
| A_68_P23069990 | chr4:84322037-84322088                            | NM_172870:-1072   | Bnc2          | PROMOTER               | 0.377                                                        | 0.582                          | 919.68             | 535.21             | 0.219                          | 725.51             | 159.22             |
| A_68_P27987613 | chr11:86014523-86014567                           | NM_178309:151     | Brip1         | INSIDE                 | 0.377                                                        | 0.519                          | 1442.15            | 748.02             | 0.195                          | 1105.35            | 215.97             |
| A_68_P21875386 | chr2:174264415-174264459                          | NM_022325:57      | Ctsc          | INSIDE                 | 0.377                                                        | 0.679                          | 6326.25            | 4298.29            | 0.256                          | 4237.74            | 1085.97            |
| A_68_P32030091 | chr19:25580881-25580925                           | NM_015826:707     | Dmrt1         | INSIDE                 | 0.377                                                        | 0.693                          | 3461.68            | 2397.73            | 0.261                          | 2630.53            | 687.09             |
| A_68_P24994095 | chr7:20158628-20158672                            | NM_027189:42      | Gemin7        | INSIDE                 | 0.377                                                        | 0.684                          | 3085.38            | 2111.39            | 0.258                          | 2288.35            | 590.73             |
| A_68_P23190566 | chr4:107108029-107108073                          | NM_147221:727     | Glis1         | INSIDE                 | 0.377                                                        | 1.478                          | 4788.96            | 7077.76            | 0.556                          | 3651.27            | 2031.75            |
| A_68_P21073106 | chr2:25434968-25435012                            | NM_001005424:629  | Gm996         | INSIDE                 | 0.377                                                        | 0.563                          | 1539.04            | 865.75             | 0.212                          | 1109.75            | 235.27             |
| A_68_P23339949 | chr4:137024813-137024857                          | NM_008305:117     | Hspg2         | INSIDE                 | 0.377                                                        | 0.550                          | 1992.29            | 1095.14            | 0.207                          | 1580.28            | 327.18             |
| A_68_P24443347 | chr6:51220315-51220359                            | NR_029719:-427    | Mir148a       | PROMOTER               | 0.377                                                        | 0.701                          | 1229.88            | 862.39             | 0.264                          | 928.52             | 245.22             |
| A_68_P23985674 | chr5:111848466-111848510                          | NM_001081235:1303 | Mn1           | INSIDE                 | 0.377                                                        | 0.643                          | 1622.85            | 1042.79            | 0.242                          | 1169.35            | 283.36             |
| A_68_P25111235 | chr7:56502306-56502350                            | NM_175272:770     | Nav2          | INSIDE                 | 0.377                                                        | 0.475                          | 2103.45            | 998.59             | 0.179                          | 1602.07            | 287.07             |
| A_68_P28224331 | chr12:8779590-8779634                             | NM_011519:1411    | Sdc1          | INSIDE                 | 0.377                                                        | 0.650                          | 3084.75            | 2005.47            | 0.245                          | 2341.09            | 573.27             |
| A_68_P25021279 | chr7:29123215-29123259                            | NM_013676:502     | Supt5h        | INSIDE                 | 0.377                                                        | 0.553                          | 3336.64            | 1843.66            | 0.208                          | 2427.40            | 505.73             |
| A_68_P30782603 | chr16:56717699-56717743                           | NM_019678:-253    | Tfg           | PROMOTER               | 0.377                                                        | 0.639                          | 1044.09            | 666.87             | 0.241                          | 911.00             | 219.11             |
| A_68_P28074035 | chr11:101327600-101327644                         | NM_012037:-109    | Vat1          | DIVERGENT_PROMOTER     | 0.377                                                        | 0.555                          | 2583.48            | 1432.77            | 0.209                          | 1999.11            | 417.91             |
| A_68_P28087340 | chr11:103672887-103672931                         | NM_009521:37420   | Wnt3          | INSIDE                 | 0.377                                                        | 1.537                          | 5118.67            | 7865.00            | 0.580                          | 3885.97            | 2253.23            |
| A_68_P21864322 | chr2:172265854-172265898                          | NM_025542:-201    | 2410001C21Rik | PROMOTER               | 0.376                                                        | 0.593                          | 1408.80            | 834.79             | 0.223                          | 1038.56            | 231.34             |
| A_68_P22383903 | chr3:102824344-102824388                          | NM_001161854:-102 | Csde1         | PROMOTER               | 0.376                                                        | 0.647                          | 808.74             | 523.50             | 0.243                          | 705.15             | 171.62             |
| A_68_P24008924 | chr5:115750457-115750502                          | NM_019682:520     | Dynll1        | INSIDE                 | 0.376                                                        | 0.625                          | 2770.59            | 1732.93            | 0.235                          | 2047.53            | 481.21             |
| A_68_P23570722 | chr5:30431999-30432043                            | NM_001167879:285  | Fam59b        | INSIDE                 | 0.376                                                        | 0.492                          | 1931.89            | 950.09             | 0.185                          | 1357.36            | 250.70             |
| A_68_P24620314 | chr6:88143770-88143814                            | NM_008090:-4865   | Gata2         | PROMOTER               | 0.376                                                        | 0.539                          | 2269.98            | 1224.54            | 0.203                          | 1815.15            | 368.02             |
| A_68_P28071797 | chr11:100941221-100941265                         | NM_010475:1518    | Hsd17b1       | INSIDE                 | 0.376                                                        | 0.473                          | 1995.61            | 943.59             | 0.178                          | 1426.12            | 253.51             |
| A_68_P20778374 | chr1:164478713-164478757                          | NM_144877:-258    | Mettl13       | PROMOTER               | 0.376                                                        | 0.698                          | 1673.31            | 1168.63            | 0.263                          | 1374.55            | 360.91             |

| ProbeName      | Target position of probe on CpG island microarray | TargetID           | GeneSymbol    | CpG island Description | Ratio of relative methylation (TiO <sub>2</sub> -NP/Vehicle) | Sham group                     |                    |                    | TiO <sub>2</sub> -H group      |                    |                    |
|----------------|---------------------------------------------------|--------------------|---------------|------------------------|--------------------------------------------------------------|--------------------------------|--------------------|--------------------|--------------------------------|--------------------|--------------------|
|                |                                                   |                    |               |                        |                                                              | Relative methylation (Cy5/Cy3) | Cy3 signal (Input) | Cy5 signal (MeDIP) | Relative methylation (Cy5/Cy3) | Cy3 signal (Input) | Cy5 signal (MeDIP) |
| A_68_P21614449 | chr2:127413281-127413325                          | NM_029963:141      | Mrps5         | INSIDE                 | 0.376                                                        | 0.672                          | 1546.53            | 1039.02            | 0.253                          | 1288.59            | 325.64             |
| A_68_P30381132 | chr15:81877600-81877644                           | NM_011482:406      | Nhp211        | INSIDE                 | 0.376                                                        | 0.482                          | 2791.11            | 1346.58            | 0.181                          | 2334.99            | 423.32             |
| A_68_P27638910 | chr1:121901664-21901708                           | NM_011023:-32      | Otx1          | PROMOTER               | 0.376                                                        | 0.456                          | 1923.97            | 876.51             | 0.171                          | 1427.76            | 244.86             |
| A_68_P22518747 | chr3:128917569-128917613                          | NM_001042502:736   | Pitx2         | INSIDE                 | 0.376                                                        | 0.418                          | 1871.32            | 782.01             | 0.157                          | 1453.58            | 228.38             |
| A_68_P26714904 | chr9:89805072-89805116                            | NM_001039655:482   | Rasgrf1       | INSIDE                 | 0.376                                                        | 0.641                          | 1055.56            | 676.09             | 0.241                          | 881.96             | 212.28             |
| A_68_P32365931 | chrX:46048088-46048132                            | NM_173376:-70      | Rbmx2         | PROMOTER               | 0.376                                                        | 0.657                          | 1113.81            | 731.76             | 0.247                          | 507.14             | 125.23             |
| A_68_P26170969 | chr8:114457634-114457678                          | NM_001033321:35    | Tmem231       | INSIDE                 | 0.376                                                        | 0.613                          | 1831.69            | 1122.60            | 0.230                          | 1433.18            | 330.11             |
| A_68_P25598461 | chr7:150254989-150255033                          | NM_001115085:-262  | Tssc4         | PROMOTER               | 0.376                                                        | 0.561                          | 1030.85            | 577.91             | 0.211                          | 694.88             | 146.50             |
| A_68_P27234634 | chr10:70747646-70747690                           | NM_145420:342      | Ube2d1        | INSIDE                 | 0.376                                                        | 0.444                          | 1934.49            | 859.07             | 0.167                          | 1590.62            | 265.77             |
| A_68_P26479797 | chr9:46251878-46251922                            |                    |               | Unknown                | 0.376                                                        | 0.686                          | 1076.23            | 738.81             | 0.258                          | 831.21             | 214.40             |
| A_68_P23319375 | chr4:133312530-133312574                          | NM_001080819:-3026 | Arid1a        | PROMOTER               | 0.375                                                        | 0.432                          | 1290.39            | 557.28             | 0.162                          | 1118.56            | 181.29             |
| A_68_P23245373 | chr4:119087968-119088012                          | NM_029286:136      | Ccdc30        | INSIDE                 | 0.375                                                        | 0.511                          | 2076.30            | 1061.75            | 0.192                          | 1777.26            | 340.50             |
| A_68_P25948536 | chr8:72413250-72413294                            | NM_026818:-1981    | Cilp2         | PROMOTER               | 0.375                                                        | 0.550                          | 2940.27            | 1616.09            | 0.206                          | 2203.60            | 454.36             |
| A_68_P21769581 | chr2:155937720-155937764                          | NM_170588:-41      | Cpne1         | PROMOTER               | 0.375                                                        | 0.652                          | 1093.47            | 713.36             | 0.245                          | 871.72             | 213.46             |
| A_68_P29699000 | chr14:70475029-70475073                           | NM_018781:-2201    | Egr3          | PROMOTER               | 0.375                                                        | 0.542                          | 1194.60            | 647.38             | 0.203                          | 954.61             | 193.80             |
| A_68_P22888257 | chr4:46356845-46356889                            | NM_183298:-199     | Foxc1         | PROMOTER               | 0.375                                                        | 0.620                          | 1158.31            | 717.90             | 0.232                          | 1056.51            | 245.61             |
| A_68_P31484557 | chr18:9214262-9214306                             | NM_008058:1431     | Fzd8          | INSIDE                 | 0.375                                                        | 0.660                          | 1436.17            | 947.72             | 0.248                          | 1152.02            | 285.42             |
| A_68_P23627555 | chr5:40036051-40036095                            | NM_010474:-202     | Hs3st1        | PROMOTER               | 0.375                                                        | 0.628                          | 1564.74            | 982.98             | 0.236                          | 1171.99            | 276.35             |
| A_68_P28079666 | chr11:102317339-102317383                         | NM_010575:13837    | Igta2b        | INSIDE                 | 0.375                                                        | 0.568                          | 2920.77            | 1658.07            | 0.213                          | 2054.87            | 437.17             |
| A_68_P26204800 | chr8:120326079-120326123                          | NM_026758:-271     | Mphosph6      | PROMOTER               | 0.375                                                        | 0.560                          | 1128.23            | 632.06             | 0.210                          | 997.82             | 209.56             |
| A_68_P31205113 | chr17:46247925-46247969                           | NM_026768:-6       | Mrps18a       | PROMOTER               | 0.375                                                        | 0.423                          | 1745.63            | 739.22             | 0.159                          | 1403.26            | 222.69             |
| A_68_P29554793 | chr14:40285528-40285572                           | NM_001190187:826   | Nrg3          | INSIDE                 | 0.375                                                        | 0.638                          | 1011.76            | 645.17             | 0.239                          | 788.74             | 188.77             |
| A_68_P20616242 | chr1:133423393-133423437                          | NM_001081011:524   | Srgap2        | INSIDE                 | 0.375                                                        | 0.521                          | 2544.03            | 1324.36            | 0.195                          | 2056.63            | 401.09             |
| A_68_P21729941 | chr2:148220875-148220919                          | NM_009219:-216     | Sstr4         | PROMOTER               | 0.375                                                        | 0.598                          | 880.40             | 526.78             | 0.224                          | 729.88             | 163.82             |
| A_68_P22869602 | chr4:43044144-43044188                            | NM_023231:90       | Stoml2        | INSIDE                 | 0.375                                                        | 0.633                          | 1196.06            | 757.30             | 0.237                          | 941.35             | 223.35             |
| A_68_P22905511 | chr4:49534082-49534127                            | NM_145547:16       | Zfp189        | INSIDE                 | 0.375                                                        | 0.545                          | 1540.35            | 838.91             | 0.204                          | 1299.90            | 265.54             |
| A_68_P24385316 | chr6:39823068-39823112                            |                    |               | Unknown                | 0.375                                                        | 0.399                          | 1490.16            | 594.85             | 0.150                          | 1111.59            | 166.61             |
| A_68_P23437421 | chr8:154624224-154624268                          | NM_001190445:172   | 2610002J02Rik | INSIDE                 | 0.374                                                        | 0.492                          | 3337.24            | 1641.54            | 0.184                          | 2477.98            | 456.36             |
| A_68_P26023138 | chr8:87531521-87531565                            | NM_001130193:6688  | Best2         | INSIDE                 | 0.374                                                        | 1.463                          | 1331.75            | 1947.71            | 0.547                          | 987.58             | 540.10             |
| A_68_P29513184 | chr14:32454218-32454262                           | NM_025295:-2       | Btd           | DIVERGENT_PROMOTER     | 0.374                                                        | 0.584                          | 1018.95            | 595.25             | 0.219                          | 797.44             | 174.38             |
| A_68_P28047526 | chr11:96777751-96777795                           | NM_030248:23       | Cdk5rap3      | INSIDE                 | 0.374                                                        | 0.596                          | 1501.27            | 895.07             | 0.223                          | 1151.62            | 256.54             |
| A_68_P29506063 | chr14:31292967-31293011                           | NM_133761:238      | Dep1a         | INSIDE                 | 0.374                                                        | 0.704                          | 1577.12            | 1110.64            | 0.264                          | 1229.62            | 324.21             |
| A_68_P24607722 | chr6:85978843-85978887                            | NM_012013:11680    | Figla         | DOWNSTREAM             | 0.374                                                        | 0.504                          | 1389.48            | 699.90             | 0.188                          | 1073.81            | 202.30             |
| A_68_P25656212 | chr8:11555954-11555998                            | NM_011919:-89      | Ing1          | DIVERGENT_PROMOTER     | 0.374                                                        | 0.539                          | 1788.90            | 964.77             | 0.202                          | 1283.50            | 259.05             |
| A_68_P31425158 | chr17:88197562-88197606                           | NM_199251:-250     | Kenk12        | PROMOTER               | 0.374                                                        | 0.571                          | 1224.58            | 699.32             | 0.214                          | 882.97             | 188.56             |
| A_68_P32276229 | chrX:16195746-16195790                            | NM_173740:-1055    | Maoa          | PROMOTER               | 0.374                                                        | 0.575                          | 1194.71            | 687.20             | 0.215                          | 536.94             | 115.36             |
| A_68_P27924663 | chr11:74992086-74992130                           | NM_027136:202      | Ovca2         | INSIDE                 | 0.374                                                        | 0.551                          | 1536.71            | 847.08             | 0.206                          | 1192.92            | 246.00             |
| A_68_P20740064 | chr1:157659559-157659603                          | NM_001024945:449   | Qsox1         | INSIDE                 | 0.374                                                        | 0.659                          | 3760.37            | 2479.17            | 0.246                          | 2848.85            | 701.65             |
| A_68_P29073052 | chr13:58502691-58502735                           | NR_031761:-896     | Rmi1          | DIVERGENT_PROMOTER     | 0.374                                                        | 0.699                          | 1409.37            | 984.66             | 0.261                          | 1116.26            | 291.50             |
| A_68_P26609890 | chr9:69138794-69138838                            | NM_013646:637208   | Rora          | INSIDE                 | 0.374                                                        | 0.598                          | 1305.17            | 780.20             | 0.223                          | 1018.95            | 227.73             |
| A_68_P26084863 | chr8:98240210-98240254                            | NM_001035123:420   | Setd6         | INSIDE                 | 0.374                                                        | 0.665                          | 1819.01            | 1209.95            | 0.249                          | 1391.57            | 346.00             |
| A_68_P27630977 | chr11:20232784-20232830                           | NM_018861:-90      | Slc1a4        | PROMOTER               | 0.374                                                        | 0.620                          | 1423.10            | 882.05             | 0.232                          | 999.64             | 231.85             |
| A_68_P25661254 | chr8:12396094-12396138                            | NM_009233:598      | Sox1          | INSIDE                 | 0.374                                                        | 0.523                          | 1735.04            | 908.20             | 0.196                          | 1348.89            | 263.86             |
| A_68_P27290695 | chr10:81050342-81050386                           | NM_019725:12088    | Tie2          | INSIDE                 | 0.374                                                        | 1.682                          | 2059.96            | 3464.99            | 0.629                          | 1360.62            | 856.45             |
| A_68_P23367600 | chr4:141640361-141640405                          | NM_145402:-163     | Tmem51        | PROMOTER               | 0.374                                                        | 0.680                          | 2337.67            | 1589.41            | 0.254                          | 1770.14            | 449.70             |
| A_68_P25542187 | chr7:140900886-140900932                          | NM_009479:70       | Uros          | INSIDE                 | 0.374                                                        | 0.654                          | 1344.15            | 878.77             | 0.244                          | 1112.54            | 271.69             |
| A_68_P28611533 | chr12:88019760-88019804                           | NM_177354:133      | Vash1         | INSIDE                 | 0.374                                                        | 0.304                          | 2327.26            | 706.63             | 0.114                          | 2022.48            | 229.66             |
| A_68_P21538596 | chr2:114027103-114027147                          | NM_175466:44       | Zfp770        | INSIDE                 | 0.374                                                        | 0.555                          | 1476.51            | 818.98             | 0.207                          | 1188.32            | 246.40             |
| A_68_P25376020 | chr7:109054295-109054339                          | NM_025605:-34      | 2400001E08Rik | PROMOTER               | 0.373                                                        | 0.598                          | 1246.58            | 744.90             | 0.223                          | 882.36             | 196.69             |
| A_68_P24219278 | chr6:6906039-6906086                              | NM_00107713:345    | Acn9          | INSIDE                 | 0.373                                                        | 0.491                          | 1636.84            | 803.46             | 0.183                          | 1192.51            | 218.16             |
| A_68_P24787432 | chr6:118512444-118512488                          | NM_001081112:-192  | Ankrd26       | PROMOTER               | 0.373                                                        | 1.366                          | 2015.02            | 2752.25            | 0.509                          | 1533.02            | 780.91             |



| ProbeName      | Target position of probe on CpG island microarray | TargetID          | GeneSymbol    | CpG island Description | Ratio of relative methylation (TiO <sub>2</sub> -NP/Vehicle) | Sham group                     |                    |                    | TiO <sub>2</sub> -H group      |                    |                    |
|----------------|---------------------------------------------------|-------------------|---------------|------------------------|--------------------------------------------------------------|--------------------------------|--------------------|--------------------|--------------------------------|--------------------|--------------------|
|                |                                                   |                   |               |                        |                                                              | Relative methylation (Cy5/Cy3) | Cy3 signal (Input) | Cy5 signal (MeDIP) | Relative methylation (Cy5/Cy3) | Cy3 signal (Input) | Cy5 signal (MeDIP) |
| A_68_P27333413 | chr10:89335981-89336025                           | NM_001128086-251  | Anks1b        | PROMOTER               | 0.373                                                        | 0.631                          | 849.39             | 535.69             | 0.235                          | 736.94             | 173.20             |
| A_68_P25522113 | chr7:137663240-137663284                          | NM_013799-209     | Ate1          | PROMOTER               | 0.373                                                        | 0.399                          | 1322.65            | 527.16             | 0.149                          | 1146.31            | 170.55             |
| A_68_P25522115 | chr7:137663415-137663459                          | NM_013799-383     | Ate1          | PROMOTER               | 0.373                                                        | 0.500                          | 2341.57            | 1170.99            | 0.186                          | 1742.52            | 324.88             |
| A_68_P23585887 | chr5:33206388-33206432                            | NM_177786:41      | Depdc5        | INSIDE                 | 0.373                                                        | 0.579                          | 1412.99            | 817.53             | 0.216                          | 1269.23            | 273.76             |
| A_68_P25015867 | chr7:27951865-27951909                            | NM_053208-65      | Egln2         | PROMOTER               | 0.373                                                        | 0.528                          | 1116.01            | 589.21             | 0.197                          | 856.52             | 168.89             |
| A_68_P22367900 | chr3:99966673-99966717                            | NM_010269-254     | Gdap2         | INSIDE                 | 0.373                                                        | 0.604                          | 1259.37            | 760.79             | 0.225                          | 960.25             | 216.33             |
| A_68_P26810381 | chr9:107578748-107578792                          | NM_008140-3153    | Gnat1         | INSIDE                 | 0.373                                                        | 0.650                          | 3492.37            | 2268.41            | 0.242                          | 2393.76            | 580.43             |
| A_68_P20832289 | chr1:174242640-174242684                          | NM_080419-125     | Igslf8        | INSIDE                 | 0.373                                                        | 0.710                          | 3360.31            | 2386.34            | 0.265                          | 2568.71            | 680.25             |
| A_68_P30473040 | chr15:97923295-97923339                           | NM_001163488-297  | Pfkm          | INSIDE                 | 0.373                                                        | 0.398                          | 1591.36            | 632.58             | 0.148                          | 1158.36            | 171.82             |
| A_68_P21221438 | chr2:52601606-52601650                            | NM_019667-445     | Stam2         | PROMOTER               | 0.373                                                        | 0.581                          | 1188.08            | 689.77             | 0.217                          | 877.37             | 190.01             |
| A_68_P26696144 | chr9:85736977-85737021                            | NM_001164792-540  | Tpbp          | INSIDE                 | 0.373                                                        | 0.555                          | 3333.29            | 1850.00            | 0.207                          | 2445.55            | 505.91             |
| A_68_P26814408 | chr9:108250538-108250582                          | NM_011678-399     | Usp4          | INSIDE                 | 0.373                                                        | 0.377                          | 1442.99            | 543.97             | 0.141                          | 1142.13            | 160.51             |
| A_68_P26246901 | chr8:127187263-127187307                          | NM_175149-15      | 2310022B05Rik | PROMOTER               | 0.372                                                        | 0.509                          | 2820.86            | 1436.60            | 0.190                          | 2109.31            | 399.83             |
| A_68_P31201455 | chr17:45643843-45643887                           | NM_198608-75      | Aars2         | INSIDE                 | 0.372                                                        | 0.561                          | 1362.30            | 763.95             | 0.209                          | 1028.70            | 214.79             |
| A_68_P27448190 | chr10:110735869-110735913                         | NM_027914-156     | Bbs10         | INSIDE                 | 0.372                                                        | 0.497                          | 1259.28            | 626.04             | 0.185                          | 941.39             | 173.95             |
| A_68_P28449508 | chr12:55963342-55963389                           | NM_007688-499     | CfI2          | INSIDE                 | 0.372                                                        | 0.613                          | 932.54             | 572.01             | 0.228                          | 691.92             | 157.95             |
| A_68_P27988567 | chr11:86170969-86171013                           | NM_001080931-37   | Med13         | INSIDE                 | 0.372                                                        | 0.633                          | 2475.01            | 1567.00            | 0.236                          | 1888.51            | 445.29             |
| A_68_P30365774 | chr15:79158797-79158841                           | NM_001199023-17   | Pla2g6        | PROMOTER               | 0.372                                                        | 0.609                          | 1039.23            | 633.31             | 0.227                          | 829.12             | 187.89             |
| A_68_P26585377 | chr9:64869052-64869096                            | NM_021345-450     | Ptplad1       | INSIDE                 | 0.372                                                        | 0.622                          | 923.15             | 574.18             | 0.231                          | 836.12             | 193.53             |
| A_68_P26936200 | chr10:10277608-10277652                           | NM_026405-375     | Rab32         | INSIDE                 | 0.372                                                        | 0.664                          | 4550.56            | 3021.23            | 0.247                          | 3475.21            | 859.00             |
| A_68_P29604814 | chr14:52738859-52738903                           | NM_001168515-8303 | Rpgrip1       | INSIDE                 | 0.372                                                        | 0.434                          | 1490.82            | 647.28             | 0.162                          | 1149.00            | 185.61             |
| A_68_P26237918 | chr8:125626137-125626182                          | NM_016738-90      | Rpl13         | PROMOTER               | 0.372                                                        | 0.569                          | 1555.77            | 885.91             | 0.212                          | 1140.64            | 241.46             |
| A_68_P20370954 | chr1:78307126-78307170                            | NM_001004173-228  | Sgpp2         | INSIDE                 | 0.372                                                        | 0.570                          | 1032.22            | 588.69             | 0.212                          | 541.15             | 114.83             |
| A_68_P28781844 | chr12:120081565-120081609                         | NM_177082-3215    | Sp8           | PROMOTER               | 0.372                                                        | 0.462                          | 2662.37            | 1228.89            | 0.172                          | 2012.03            | 345.67             |
| A_68_P25102503 | chr7:54263926-54263970                            | NM_175318-164     | Spty2d1       | PROMOTER               | 0.372                                                        | 0.709                          | 1940.59            | 1375.01            | 0.264                          | 1561.52            | 412.11             |
| A_68_P28071037 | chr11:100800754-100800798                         | NM_011486-49      | Stat3         | INSIDE                 | 0.372                                                        | 0.701                          | 1543.79            | 1082.81            | 0.261                          | 1181.06            | 307.97             |
| A_68_P22733170 | chr4:12015068-12015112                            | NM_177861-14      | Tmem67        | INSIDE                 | 0.372                                                        | 0.333                          | 1848.60            | 616.16             | 0.124                          | 1452.29            | 180.16             |
| A_68_P22982500 | chr4:65266278-65266324                            | NM_001161782-281  | Trim32        | INSIDE                 | 0.372                                                        | 4.813                          | 8083.80            | 38907.65           | 1.792                          | 5043.12            | 9035.68            |
| A_68_P27184874 | chr10:61693685-61693729                           | NM_197996-260     | Tspan15       | INSIDE                 | 0.372                                                        | 0.456                          | 2279.58            | 1039.91            | 0.170                          | 1826.28            | 310.29             |
| A_68_P29624841 | chr14:57429933-57429977                           | NM_144842-599     | Znym5         | INSIDE                 | 0.372                                                        | 0.460                          | 1489.81            | 685.86             | 0.171                          | 1148.41            | 196.90             |
| A_68_P31402644 | chr17:84496087-84496131                           | AK043195-103      |               | PROMOTER               | 0.372                                                        | 0.554                          | 2356.40            | 1306.16            | 0.206                          | 1735.23            | 357.53             |
| A_68_P26521201 | chr9:53344702-53344746                            | NM_007499-52      | Atm           | INSIDE                 | 0.371                                                        | 0.563                          | 1806.66            | 1017.29            | 0.209                          | 1388.30            | 289.78             |
| A_68_P24009173 | chr5:115798570-115798614                          | NM_007748-372     | Cox6a1        | INSIDE                 | 0.371                                                        | 0.616                          | 2290.27            | 1410.48            | 0.228                          | 1743.29            | 397.93             |
| A_68_P20457521 | chr1:95698612-95698656                            | NM_001105667-123  | Dtymk         | DIVERGENT_PROMOTER     | 0.371                                                        | 0.592                          | 1041.93            | 616.49             | 0.220                          | 836.20             | 183.79             |
| A_68_P29672520 | chr14:65881704-65881748                           | NM_021458-426     | Fzd3          | DIVERGENT_PROMOTER     | 0.371                                                        | 0.390                          | 1823.79            | 710.57             | 0.145                          | 1432.21            | 207.20             |
| A_68_P22310076 | chr3:87600886-87600930                            | NM_011832-36      | Insrr         | INSIDE                 | 0.371                                                        | 0.623                          | 1828.87            | 1138.98            | 0.231                          | 1451.56            | 335.52             |
| A_68_P22303234 | chr3:86350689-86350733                            | NM_011839-1495    | Mab21l2       | INSIDE                 | 0.371                                                        | 0.692                          | 3024.69            | 2091.84            | 0.257                          | 2148.70            | 552.00             |
| A_68_P20600071 | chr1:130256165-130256209                          | NM_008567-47      | Mcm6          | INSIDE                 | 0.371                                                        | 0.330                          | 1786.80            | 589.58             | 0.122                          | 1566.63            | 191.87             |
| A_68_P27555607 | chr11:3996584-3996628                             | NM_026443-1172    | Mtfp1         | PROMOTER               | 0.371                                                        | 0.540                          | 1683.71            | 909.01             | 0.200                          | 1243.79            | 248.91             |
| A_68_P26803472 | chr9:106355981-106356025                          | NM_021567-185     | Pebp4         | PROMOTER               | 0.371                                                        | 0.633                          | 3803.95            | 2409.24            | 0.235                          | 2799.94            | 658.50             |
| A_68_P23542950 | chr5:24104639-24104683                            | NM_025891-3160    | Smardc3       | INSIDE                 | 0.371                                                        | 0.697                          | 3373.47            | 2352.53            | 0.259                          | 2692.22            | 697.16             |
| A_68_P28744145 | chr12:112683846-112683890                         | NM_009396-2997    | Tnfaip2       | INSIDE                 | 0.371                                                        | 0.520                          | 2026.59            | 1053.27            | 0.193                          | 1632.63            | 314.96             |
| A_68_P25500777 | chr7:133630795-133630839                          | NM_001163713-52   | Tufm          | PROMOTER               | 0.371                                                        | 0.604                          | 2306.18            | 1393.18            | 0.224                          | 1675.38            | 375.58             |
| A_68_P29081868 | chr13:59923934-59923978                           | NM_153538-552     | Zechc6        | INSIDE                 | 0.371                                                        | 0.380                          | 2426.51            | 922.15             | 0.141                          | 2050.26            | 289.17             |
| A_68_P27104120 | chr10:43868558-43868602                           |                   |               | Unknown                | 0.371                                                        | 0.649                          | 1984.04            | 1288.29            | 0.241                          | 1465.56            | 353.43             |
| A_68_P26812297 | chr9:107888019-107888063                          | NM_026597-207     | 6230427J02Rik | INSIDE                 | 0.370                                                        | 0.566                          | 1015.81            | 574.57             | 0.209                          | 795.95             | 166.55             |
| A_68_P21421624 | chr2:91105178-91105222                            | NM_001166024-71   | Arfgap2       | PROMOTER               | 0.370                                                        | 0.643                          | 1051.41            | 676.43             | 0.238                          | 865.43             | 206.21             |
| A_68_P24056050 | chr5:123958945-123958990                          | NM_198611-1501    | B3gnt4        | PROMOTER               | 0.370                                                        | 0.545                          | 1243.02            | 677.99             | 0.202                          | 988.45             | 199.35             |
| A_68_P28033137 | chr11:94334569-94334613                           | NM_001112813-922  | Caena1g       | INSIDE                 | 0.370                                                        | 0.334                          | 2173.74            | 726.93             | 0.124                          | 1681.55            | 207.80             |
| A_68_P21976418 | chr3:19594468-19594512                            | NM_205769-906     | Crh           | INSIDE                 | 0.370                                                        | 0.350                          | 1613.65            | 564.62             | 0.130                          | 1344.50            | 174.16             |
| A_68_P30476581 | chr15:98635925-98635969                           | NM_001013741-2410 | Ddn           | INSIDE                 | 0.370                                                        | 0.477                          | 1136.62            | 541.64             | 0.176                          | 853.54             | 150.62             |

| ProbeName      | Target position of probe on CpG island microarray | TargetID                  | GeneSymbol    | CpG island Description | Ratio of relative methylation (TiO <sub>2</sub> -NP/Vehicle) | Sham group                     |                    |                    | TiO <sub>2</sub> -H group      |                    |                    |
|----------------|---------------------------------------------------|---------------------------|---------------|------------------------|--------------------------------------------------------------|--------------------------------|--------------------|--------------------|--------------------------------|--------------------|--------------------|
|                |                                                   |                           |               |                        |                                                              | Relative methylation (Cy5/Cy3) | Cy3 signal (Input) | Cy5 signal (MeDIP) | Relative methylation (Cy5/Cy3) | Cy3 signal (Input) | Cy5 signal (MeDIP) |
| A_68_P26810382 | chr9:107578840-107578884                          | NM_008140:3061            | Gnat1         | INSIDE                 | 0.370                                                        | 0.562                          | 2572.85            | 1446.90            | 0.208                          | 1862.26            | 387.15             |
| A_68_P24318697 | chr6:28085365-28085421                            | NM_008174:-1023           | Grm8          | PROMOTER               | 0.370                                                        | 0.524                          | 1001.98            | 525.21             | 0.194                          | 878.10             | 170.48             |
| A_68_P26220486 | chr8:123012400-123012445                          | NM_198671:-343            | Gse1          | PROMOTER               | 0.370                                                        | 0.631                          | 1511.00            | 953.06             | 0.233                          | 993.55             | 231.90             |
| A_68_P21906900 | chr2:180627890-180627934                          | NR_029538:-832            | Mir124a-3     | PROMOTER               | 0.370                                                        | 0.452                          | 2903.67            | 1311.40            | 0.167                          | 2160.01            | 361.10             |
| A_68_P27924624 | chr11:74986764-74986808                           | NR_029794:-103            | Mir212        | DIVERGENT_PROMOTER     | 0.370                                                        | 0.589                          | 886.91             | 522.01             | 0.218                          | 675.07             | 146.83             |
| A_68_P22129911 | chr3:51288253-51288297                            | NM_016858:387             | Rab33b        | INSIDE                 | 0.370                                                        | 0.582                          | 1602.37            | 932.44             | 0.215                          | 1357.65            | 291.97             |
| A_68_P20022049 | chr1:9289822-9289866                              | NM_027671:-33             | Sntg1         | PROMOTER               | 0.370                                                        | 0.527                          | 1337.96            | 704.86             | 0.195                          | 1107.80            | 216.19             |
| A_68_P28909029 | chr13:29051502-29051546                           | NM_009238:-5973           | Sox4          | PROMOTER               | 0.370                                                        | 0.592                          | 1691.19            | 1001.67            | 0.219                          | 1214.69            | 266.31             |
| A_68_P25576304 | chr7:146373808-146373852                          | NM_021302:563             | Stk32c        | INSIDE                 | 0.370                                                        | 0.526                          | 1714.22            | 901.08             | 0.195                          | 1413.47            | 274.93             |
| A_68_P20638619 | chr1:137210199-137210243                          | NM_011590:94              | Timm17a       | INSIDE                 | 0.370                                                        | 0.694                          | 1718.46            | 1192.95            | 0.257                          | 1320.26            | 339.28             |
| A_68_P23012911 | chr4:71860767-71860811                            | NM_011599:1165            | Tle1          | INSIDE                 | 0.370                                                        | 0.453                          | 1503.64            | 681.47             | 0.167                          | 1141.27            | 191.14             |
| A_68_P29428735 | chr14:17198392-17198436                           | NM_009409:695             | Top2b         | INSIDE                 | 0.370                                                        | 0.674                          | 1504.02            | 1014.20            | 0.249                          | 1100.21            | 274.36             |
| A_68_P22584284 | chr3:141128445-141128489                          | NM_009472:-61             | Unc5c         | PROMOTER               | 0.370                                                        | 0.575                          | 2698.73            | 1551.80            | 0.213                          | 2117.13            | 450.32             |
| A_68_P26478900 | chr9:46081259-46081303                            | NM_011752:134             | Zfp259        | INSIDE                 | 0.370                                                        | 0.476                          | 1359.42            | 646.66             | 0.176                          | 1243.16            | 218.91             |
| A_68_P25063515 | chr7:38556810-38556854                            | NM_172385:-2061           | Zfp536        | PROMOTER               | 0.370                                                        | 0.645                          | 1075.96            | 693.54             | 0.239                          | 811.94             | 193.89             |
| A_68_P27942257 | chr11:78075584-78075628                           | NM_001002004:351          | 2610507B11Rik | INSIDE                 | 0.369                                                        | 0.544                          | 2133.03            | 1160.71            | 0.201                          | 1619.30            | 325.27             |
| A_68_P27938080 | chr11:77329296-77329340                           | NM_026185:700             | Abhd15        | INSIDE                 | 0.369                                                        | 0.522                          | 1318.57            | 687.90             | 0.193                          | 1028.42            | 198.06             |
| A_68_P25050069 | chr7:36371356-36371409                            | NM_178263:117             | Ankrd27       | INSIDE                 | 0.369                                                        | 0.612                          | 860.19             | 526.55             | 0.226                          | 672.05             | 151.87             |
| A_68_P26356121 | chr9:23026902-23026947                            | NM_028472:-595            | Bmpcr         | PROMOTER               | 0.369                                                        | 1.643                          | 1952.36            | 3208.29            | 0.606                          | 1498.57            | 907.76             |
| A_68_P31145617 | chr17:32589667-32589711                           | NM_177307:21              | Cyp4f39       | INSIDE                 | 0.369                                                        | 1.547                          | 1792.63            | 2772.84            | 0.571                          | 1301.42            | 743.55             |
| A_68_P22649279 | chr3:151873278-151873322                          | NM_027287:-37             | Dnajb4        | DIVERGENT_PROMOTER     | 0.369                                                        | 0.480                          | 1350.69            | 648.44             | 0.177                          | 1091.22            | 193.15             |
| A_68_P24817442 | chr6:124813681-124813725                          | NM_013533:233             | Gpr162        | INSIDE                 | 0.369                                                        | 0.432                          | 2790.75            | 1206.46            | 0.159                          | 2126.92            | 339.15             |
| A_68_P30962573 | chr16:91372961-91373005                           | NM_001110498:-45          | Ifnar2        | PROMOTER               | 0.369                                                        | 1.806                          | 1740.37            | 3143.44            | 0.667                          | 1253.02            | 835.76             |
| A_68_P31733116 | chr18:57085552-57085596                           | NM_177115:-372            | Marchf3       | PROMOTER               | 0.369                                                        | 0.549                          | 1476.92            | 810.67             | 0.203                          | 1171.17            | 237.29             |
| A_68_P26134879 | chr8:108137855-108137899                          | NR_035492:-1489           | Mir1966       | PROMOTER               | 0.369                                                        | 0.547                          | 1646.97            | 901.33             | 0.202                          | 1453.38            | 293.57             |
| A_68_P29448048 | chr14:21460427-21460474                           | NM_021508:15312           | Myoz1         | DOWNSTREAM             | 0.369                                                        | 0.591                          | 1254.51            | 740.98             | 0.218                          | 1043.25            | 227.15             |
| A_68_P20010810 | chr1:5906552-5906596                              | NM_010342:905             | Npbwr1        | INSIDE                 | 0.369                                                        | 1.711                          | 2495.38            | 4269.75            | 0.631                          | 1896.36            | 1195.84            |
| A_68_P23354456 | chr4:139384273-139384317                          | NM_011039:4589            | Pax7          | INSIDE                 | 0.369                                                        | 0.593                          | 1252.20            | 742.35             | 0.219                          | 1007.13            | 220.38             |
| A_68_P23399007 | chr4:148540337-148540381                          | NM_001081274:458          | Pgd           | INSIDE                 | 0.369                                                        | 0.494                          | 3376.20            | 1667.68            | 0.182                          | 2673.45            | 487.18             |
| A_68_P26464018 | chr9:43611946-43611990                            | NM_021424:59310           | Pvr11         | INSIDE                 | 0.369                                                        | 1.592                          | 2626.63            | 4180.82            | 0.588                          | 2022.89            | 1189.23            |
| A_68_P27943493 | chr11:78279470-78279514                           | NM_026740:290             | Ste46a1       | INSIDE                 | 0.369                                                        | 0.544                          | 1583.58            | 861.37             | 0.201                          | 1242.60            | 249.24             |
| A_68_P21836562 | chr2:167456829-167456873                          | NM_023230:655             | Ube2v1        | INSIDE                 | 0.369                                                        | 0.640                          | 7254.47            | 4646.42            | 0.236                          | 5275.91            | 1247.68            |
| A_68_P22039930 | chr3:32716759-32716803                            | NM_001013024:233          | Usp13         | INSIDE                 | 0.369                                                        | 0.588                          | 1373.60            | 807.09             | 0.217                          | 1076.73            | 233.35             |
| A_68_P24097670 | chr5:131783250-131783294                          | NM_145218:120             | Wbser17       | INSIDE                 | 0.369                                                        | 0.747                          | 4369.97            | 3265.77            | 0.275                          | 3230.56            | 889.72             |
| A_68_P24686641 | chr6:99471046-99471094                            | ENSMUST00000155466:145721 |               | INSIDE                 | 0.369                                                        | 0.579                          | 1235.84            | 715.32             | 0.213                          | 1041.31            | 222.27             |
| A_68_P25541690 | chr7:140829066-140829110                          | NM_178115:-269            | 2700050L05Rik | PROMOTER               | 0.368                                                        | 0.463                          | 1801.90            | 834.44             | 0.170                          | 1636.13            | 278.48             |
| A_68_P27932871 | chr11:76384753-76384797                           | NM_198895:102             | Abr           | INSIDE                 | 0.368                                                        | 0.676                          | 4400.34            | 2973.23            | 0.248                          | 3399.93            | 844.40             |
| A_68_P21840065 | chr2:168031845-168031889                          | NM_009628:696             | Adnp          | INSIDE                 | 0.368                                                        | 1.759                          | 6730.07            | 11837.36           | 0.647                          | 4875.54            | 3155.13            |
| A_68_P30588537 | chr16:20621774-20621818                           | NM_028420:-445            | Camk2n2       | DIVERGENT_PROMOTER     | 0.368                                                        | 0.486                          | 2447.06            | 1190.31            | 0.179                          | 1934.82            | 346.13             |
| A_68_P31921845 | chr19:4215539-4215583                             | NM_019952:1169            | C1cl1         | INSIDE                 | 0.368                                                        | 0.459                          | 4158.15            | 1906.85            | 0.169                          | 3338.13            | 563.15             |
| A_68_P29699020 | chr14:70477756-70477800                           | NM_018781:527             | Egr3          | INSIDE                 | 0.368                                                        | 0.632                          | 2005.00            | 1266.39            | 0.232                          | 1471.41            | 341.64             |
| A_68_P23968409 | chr5:108150354-108150398                          | NM_010278:2987            | Gfi1          | INSIDE                 | 0.368                                                        | 0.440                          | 2694.53            | 1186.86            | 0.162                          | 2359.37            | 381.96             |
| A_68_P25736704 | chr8:28232129-28232173                            | NM_054044:35838           | Gpr124        | INSIDE                 | 0.368                                                        | 1.449                          | 1249.75            | 1810.38            | 0.533                          | 1079.04            | 575.38             |
| A_68_P28089845 | chr11:104093103-104093147                         | NM_001038609:375          | Mapt          | INSIDE                 | 0.368                                                        | 0.451                          | 1322.61            | 596.24             | 0.166                          | 913.25             | 151.68             |
| A_68_P25578898 | chr7:146768350-146768394                          | NR_027857:324             | Nkx6-2        | INSIDE                 | 0.368                                                        | 0.584                          | 1587.11            | 927.23             | 0.215                          | 1164.07            | 250.52             |
| A_68_P24990654 | chr7:19548318-19548362                            | NM_001029877:37104        | Nova2         | INSIDE                 | 0.368                                                        | 0.671                          | 2332.29            | 1564.36            | 0.247                          | 1919.15            | 473.29             |
| A_68_P26567741 | chr9:61762053-61762098                            | NM_018853:242             | Rplp1         | INSIDE                 | 0.368                                                        | 0.673                          | 2655.14            | 1786.03            | 0.247                          | 2042.06            | 505.38             |
| A_68_P27924902 | chr11:75027241-75027285                           | NM_177708:19768           | Rtn4r1        | INSIDE                 | 0.368                                                        | 0.546                          | 1933.57            | 1055.77            | 0.201                          | 1441.23            | 289.59             |
| A_68_P22169677 | chr3:58496154-58496198                            | NM_009174:134             | Siah2         | INSIDE                 | 0.368                                                        | 0.501                          | 1256.52            | 629.58             | 0.184                          | 1022.76            | 188.36             |
| A_68_P30544461 | chr16:10785857-10785901                           | NM_009896:-249            | Socs1         | PROMOTER               | 0.368                                                        | 0.595                          | 1490.91            | 887.75             | 0.219                          | 1122.29            | 245.84             |
| A_68_P31752537 | chr18:60784125-60784169                           | NM_177340:-187            | Synpo         | PROMOTER               | 0.368                                                        | 0.713                          | 2813.16            | 2005.75            | 0.262                          | 2269.24            | 595.25             |

| ProbeName      | Target position of probe on CpG island microarray | TargetID           | GeneSymbol    | CpG island Description | Ratio of relative methylation (TiO <sub>2</sub> -NP/Vehicle) | Sham group                     |                    |                    | TiO <sub>2</sub> -H group      |                    |                    |
|----------------|---------------------------------------------------|--------------------|---------------|------------------------|--------------------------------------------------------------|--------------------------------|--------------------|--------------------|--------------------------------|--------------------|--------------------|
|                |                                                   |                    |               |                        |                                                              | Relative methylation (Cy5/Cy3) | Cy3 signal (Input) | Cy5 signal (MeDIP) | Relative methylation (Cy5/Cy3) | Cy3 signal (Input) | Cy5 signal (MeDIP) |
| A_68_P29855890 | chr14:102007762-102007806                         | NM_001081278:624   | Tbc1d4        | INSIDE                 | 0.368                                                        | 0.515                          | 2418.56            | 1245.80            | 0.190                          | 1945.13            | 368.82             |
| A_68_P25510961 | chr7:135605591-135605635                          | NM_009383:-585     | Tial1         | PROMOTER               | 0.368                                                        | 0.536                          | 1014.76            | 543.51             | 0.197                          | 867.11             | 170.87             |
| A_68_P32144293 | chr19:46574614-46574658                           | NM_053100:-1501    | Trim8         | PROMOTER               | 0.368                                                        | 0.699                          | 2968.85            | 2076.71            | 0.257                          | 2146.07            | 552.02             |
| A_68_P22552063 | chr3:135102173-135102217                          | NM_025356:472      | Ube2d3        | INSIDE                 | 0.368                                                        | 0.625                          | 1947.42            | 1216.38            | 0.230                          | 1437.53            | 330.82             |
| A_68_P32217702 | chr19:59246036-59246083                           | NM_009501:-1540    | Vax1          | PROMOTER               | 0.368                                                        | 1.763                          | 2005.02            | 3535.34            | 0.650                          | 1394.70            | 906.05             |
| A_68_P23296404 | chr4:129055173-129055217                          | NM_028603:78       | Zbtb8a        | INSIDE                 | 0.368                                                        | 0.554                          | 1797.67            | 995.39             | 0.204                          | 1518.39            | 309.05             |
| A_68_P24958145 | chr7:7074049-7074093                              | NM_172738:117      | Zfp954        | INSIDE                 | 0.368                                                        | 0.624                          | 1752.32            | 1094.30            | 0.230                          | 1266.05            | 290.61             |
| A_68_P25470558 | chr7:127974492-127974536                          |                    |               | Unknown                | 0.368                                                        | 0.698                          | 1763.01            | 1231.02            | 0.257                          | 1335.15            | 343.40             |
| A_68_P28787949 | chr13:3359101-3359145                             |                    |               | Unknown                | 0.368                                                        | 0.608                          | 2079.16            | 1263.88            | 0.224                          | 1629.70            | 364.41             |
| A_68_P20774313 | chr1:163806678-163806722                          | NM_172645:92       | AI848100      | INSIDE                 | 0.367                                                        | 0.580                          | 4191.61            | 2429.48            | 0.213                          | 2962.20            | 630.90             |
| A_68_P20770398 | chr1:163101115-163101159                          | NM_028664:28294    | Ankrd45       | DOWNSTREAM             | 0.367                                                        | 0.706                          | 2741.32            | 1934.83            | 0.259                          | 2206.06            | 571.18             |
| A_68_P25588372 | chr7:148547330-148547384                          | NR_035332:3653     | B230206H07Rik | INSIDE                 | 0.367                                                        | 4.016                          | 965.36             | 3877.05            | 1.473                          | 734.15             | 1081.55            |
| A_68_P27854481 | chr11:62352177-62352221                           | NM_028448:565      | Cenpv         | INSIDE                 | 0.367                                                        | 0.675                          | 1792.10            | 1209.72            | 0.248                          | 1317.70            | 326.44             |
| A_68_P23155325 | chr4:101169532-101169576                          | NM_198412:302      | Dnajc6        | INSIDE                 | 0.367                                                        | 0.589                          | 1393.48            | 820.60             | 0.216                          | 994.58             | 214.77             |
| A_68_P22149459 | chr3:54539268-54539312                            | NM_001163570:-4    | Exosc8        | DIVERGENT_PROMOTER     | 0.367                                                        | 0.619                          | 1633.62            | 1012.02            | 0.227                          | 1454.55            | 330.87             |
| A_68_P24784005 | chr6:117866930-117866974                          | NM_001166427:-359  | Hnrnpf        | PROMOTER               | 0.367                                                        | 0.586                          | 1905.99            | 1117.24            | 0.215                          | 1450.07            | 312.04             |
| A_68_P31381041 | chr17:80460590-80460634                           | NM_144802:1062     | Hnrp11        | INSIDE                 | 0.367                                                        | 0.428                          | 2048.07            | 876.46             | 0.157                          | 1597.30            | 250.70             |
| A_68_P24171751 | chr5:147888207-147888251                          | NM_080795:-80      | Lnx2          | DIVERGENT_PROMOTER     | 0.367                                                        | 0.432                          | 1415.22            | 610.72             | 0.159                          | 1052.78            | 166.95             |
| A_68_P29044037 | chr13:53557736-53557785                           | NM_013601:10389    | Msx2          | DOWNSTREAM             | 0.367                                                        | 0.659                          | 1970.32            | 1299.01            | 0.242                          | 1359.38            | 328.66             |
| A_68_P25949908 | chr8:72636524-72636568                            | NM_007789:8197     | Ncan          | INSIDE                 | 0.367                                                        | 0.582                          | 1171.23            | 681.59             | 0.213                          | 918.64             | 195.95             |
| A_68_P27901894 | chr11:70467828-70467872                           | NM_011072:302      | Pfn1          | INSIDE                 | 0.367                                                        | 0.660                          | 1700.64            | 1122.36            | 0.242                          | 1120.07            | 271.19             |
| A_68_P28151618 | chr11:115015440-115015484                         | NM_021411:-29      | Rab37         | PROMOTER               | 0.367                                                        | 13.375                         | 4190.60            | 56049.64           | 4.911                          | 3112.74            | 15287.51           |
| A_68_P20250386 | chr1:57027876-57027920                            | NM_139146:280      | Satb2         | INSIDE                 | 0.367                                                        | 0.721                          | 4515.25            | 3255.16            | 0.264                          | 2873.17            | 759.41             |
| A_68_P30546003 | chr16:11066050-11066094                           | NM_009223:-318     | Snn           | PROMOTER               | 0.367                                                        | 0.487                          | 2775.35            | 1351.27            | 0.179                          | 212.81             | 377.92             |
| A_68_P32957267 | chr17:8477533-8477577                             | NM_018819:877      | Brp441        | INSIDE                 | 0.366                                                        | 0.430                          | 2294.45            | 985.74             | 0.157                          | 1874.90            | 295.18             |
| A_68_P26543685 | chr9:57613651-57613695                            | NM_007713:-5       | Clk3          | PROMOTER               | 0.366                                                        | 0.424                          | 2415.65            | 1025.21            | 0.155                          | 1907.78            | 296.45             |
| A_68_P29611635 | chr14:54873344-54873388                           | NM_001113358:238   | Dad1          | INSIDE                 | 0.366                                                        | 0.544                          | 2468.07            | 1343.80            | 0.199                          | 1980.63            | 394.71             |
| A_68_P26468507 | chr9:44412404-44412448                            | NM_001110826:-548  | Ddx6          | PROMOTER               | 0.366                                                        | 0.641                          | 1400.24            | 897.94             | 0.235                          | 1104.97            | 259.50             |
| A_68_P25082496 | chr7:50720344-50720388                            | NM_026695:20854    | Etfb          | DOWNSTREAM             | 0.366                                                        | 0.528                          | 3554.86            | 1878.03            | 0.193                          | 2621.67            | 506.75             |
| A_68_P26593512 | chr9:66359862-66359906                            | NM_175206:2516     | Fbxl22        | INSIDE                 | 0.366                                                        | 0.675                          | 991.70             | 669.31             | 0.247                          | 868.51             | 214.47             |
| A_68_P23968432 | chr5:108153037-108153081                          | NM_010278:305      | Gfi1          | INSIDE                 | 0.366                                                        | 0.652                          | 2715.19            | 1770.48            | 0.239                          | 2039.13            | 486.52             |
| A_68_P25580591 | chr7:147020155-147020199                          | NM_177469:104      | Gpr123        | INSIDE                 | 0.366                                                        | 0.556                          | 951.68             | 528.86             | 0.204                          | 821.51             | 167.20             |
| A_68_P26526551 | chr9:54434255-54434299                            | NM_029573:-41      | Idh3a         | PROMOTER               | 0.366                                                        | 0.643                          | 3186.60            | 2048.03            | 0.235                          | 2635.93            | 620.29             |
| A_68_P30350212 | chr15:76553038-76553082                           | NM_198119:-457     | Lrre24        | PROMOTER               | 0.366                                                        | 0.490                          | 1781.72            | 873.53             | 0.180                          | 1217.47            | 218.75             |
| A_68_P30939710 | chr16:87432281-87432325                           | NM_001081068:549   | Ltn1          | INSIDE                 | 0.366                                                        | 0.682                          | 1974.27            | 1347.44            | 0.250                          | 1663.64            | 415.75             |
| A_68_P31117836 | chr17:27822046-27822090                           | NM_178365:-130     | Pacsin1       | PROMOTER               | 0.366                                                        | 0.466                          | 1736.60            | 809.51             | 0.171                          | 1241.91            | 212.04             |
| A_68_P21913217 | chr2:181598855-181598899                          | NM_025901:-188     | Polr3k        | PROMOTER               | 0.366                                                        | 0.499                          | 1025.36            | 511.73             | 0.183                          | 723.84             | 132.32             |
| A_68_P31302583 | chr17:66121848-66121892                           | NM_133685:222      | Rab31         | INSIDE                 | 0.366                                                        | 0.430                          | 1523.83            | 655.05             | 0.157                          | 1090.70            | 171.37             |
| A_68_P24052512 | chr5:123300221-123300265                          | NM_030564:46       | Rnf34         | INSIDE                 | 0.366                                                        | 0.692                          | 1037.33            | 717.42             | 0.253                          | 891.48             | 225.95             |
| A_68_P22199716 | chr3:65196136-65196183                            | NM_026155:316      | Ssr3          | INSIDE                 | 0.366                                                        | 1.567                          | 1433.03            | 2244.91            | 0.573                          | 1122.68            | 643.02             |
| A_68_P27392328 | chr10:99950341-99950385                           | NM_001110013:-381  | Tmtc3         | DIVERGENT_PROMOTER     | 0.366                                                        | 0.500                          | 3863.71            | 1931.11            | 0.183                          | 2898.74            | 530.85             |
| A_68_P27780095 | chr11:48630257-48630301                           | NM_145377:615      | Trim41        | INSIDE                 | 0.366                                                        | 0.693                          | 3398.98            | 2354.41            | 0.253                          | 2424.95            | 614.69             |
| A_68_P24950639 | chr7:4764364-4764408                              | NM_133777:-444     | Ube2s         | PROMOTER               | 0.366                                                        | 1.628                          | 13007.66           | 21180.35           | 0.597                          | 8763.23            | 5227.49            |
| A_68_P26749716 | chr9:96789602-96789646                            | NM_153420:217      | Acp12         | INSIDE                 | 0.365                                                        | 0.604                          | 8480.39            | 5122.60            | 0.220                          | 590.23             | 1304.23            |
| A_68_P28450015 | chr12:56085848-56085892                           | NM_013815:1453     | Baz1a         | INSIDE                 | 0.365                                                        | 0.680                          | 2723.92            | 1851.08            | 0.248                          | 2147.50            | 532.50             |
| A_68_P26055734 | chr8:93431736-93431780                            | NM_177224:79025    | Chd9          | INSIDE                 | 0.365                                                        | 0.516                          | 1586.60            | 818.66             | 0.188                          | 1265.60            | 238.22             |
| A_68_P21818155 | chr2:164312484-164312528                          | NM_001048229:-1104 | Dbndd2        | PROMOTER               | 0.365                                                        | 0.680                          | 1143.31            | 777.68             | 0.249                          | 900.59             | 223.81             |
| A_68_P31890268 | chr18:84889452-84889496                           | NM_173770:-159     | Fam69c        | PROMOTER               | 0.365                                                        | 0.519                          | 1894.09            | 983.56             | 0.190                          | 1558.48            | 295.66             |
| A_68_P20351044 | chr1:74931604-74931648                            | NM_153111:356      | Fev           | INSIDE                 | 0.365                                                        | 0.652                          | 3328.55            | 2168.66            | 0.238                          | 2335.52            | 555.21             |
| A_68_P28924098 | chr13:31721161-31721205                           | NM_010225:3498     | Foxf2         | INSIDE                 | 0.365                                                        | 0.641                          | 1875.27            | 1201.92            | 0.234                          | 1376.93            | 321.71             |
| A_68_P24810880 | chr6:122824802-122824859                          | NM_026267:256      | Necap1        | INSIDE                 | 0.365                                                        | 0.520                          | 1498.27            | 778.43             | 0.190                          | 1145.87            | 217.19             |

| ProbeName      | Target position of probe on CpG island microarray | TargetID                 | GeneSymbol    | CpG island Description | Ratio of relative methylation (TiO <sub>2</sub> -NP/Vehicle) | Sham group                     |                    |                    | TiO <sub>2</sub> -H group      |                    |                    |
|----------------|---------------------------------------------------|--------------------------|---------------|------------------------|--------------------------------------------------------------|--------------------------------|--------------------|--------------------|--------------------------------|--------------------|--------------------|
|                |                                                   |                          |               |                        |                                                              | Relative methylation (Cy5/Cy3) | Cy3 signal (Input) | Cy5 signal (MeDIP) | Relative methylation (Cy5/Cy3) | Cy3 signal (Input) | Cy5 signal (MeDIP) |
| A_68_P26076074 | chr8:96738369-96738413                            | NM_172410:-110           | Nup93         | PROMOTER               | 0.365                                                        | 0.640                          | 1151.63            | 737.03             | 0.234                          | 880.41             | 205.75             |
| A_68_P31929450 | chr19:5560018-5560062                             | NM_019935:535            | Ovol1         | INSIDE                 | 0.365                                                        | 0.507                          | 2049.44            | 1040.05            | 0.185                          | 1613.64            | 299.18             |
| A_68_P25373531 | chr7:108599782-108599826                          | NR_026574:-17            | Pde2a         | PROMOTER               | 0.365                                                        | 0.492                          | 4645.45            | 2283.91            | 0.179                          | 3315.28            | 594.43             |
| A_68_P23228359 | chr4:115894431-115894475                          | NM_181585:-66            | Pik3r3        | PROMOTER               | 0.365                                                        | 0.529                          | 1566.05            | 829.17             | 0.193                          | 1213.12            | 234.41             |
| A_68_P21115151 | chr2:32251028-32251072                            | NM_133783:-359           | Ptges2        | DIVERGENT_PROMOTER     | 0.365                                                        | 0.588                          | 1314.57            | 772.59             | 0.214                          | 1013.72            | 217.17             |
| A_68_P32806533 | chrX:162917564-162917608                          | NM_019773:213            | Rab9          | INSIDE                 | 0.365                                                        | 1.482                          | 2254.55            | 3340.86            | 0.541                          | 975.33             | 527.39             |
| A_68_P21824257 | chr2:165329532-165329576                          | NM_130451:77             | Slc2a10       | INSIDE                 | 0.365                                                        | 0.542                          | 1306.20            | 707.64             | 0.198                          | 1231.11            | 243.71             |
| A_68_P30939796 | chr16:87455183-87455227                           | NM_024258:-25            | Usp16         | PROMOTER               | 0.365                                                        | 0.514                          | 1171.02            | 601.72             | 0.188                          | 1168.48            | 219.09             |
| A_68_P28872662 | chr13:21494612-21494656                           | NM_001145778:-10         | Zkscan3       | PROMOTER               | 0.365                                                        | 0.728                          | 2642.27            | 1922.65            | 0.266                          | 2039.20            | 541.83             |
| A_68_P32141578 | chr19:46073169-46073219                           | NM_198296:-216           | 9130011E15Rik | DIVERGENT_PROMOTER     | 0.364                                                        | 0.540                          | 1105.89            | 596.97             | 0.197                          | 794.71             | 156.33             |
| A_68_P20632244 | chr1:136131312-136131356                          | NM_001008533:670         | Adora1        | INSIDE                 | 0.364                                                        | 0.529                          | 1761.63            | 931.49             | 0.193                          | 1462.88            | 281.90             |
| A_68_P20147467 | chr1:36364433-36364477                            | NM_001172205:-123        | Arid5a        | PROMOTER               | 0.364                                                        | 0.592                          | 997.95             | 590.96             | 0.215                          | 902.68             | 194.44             |
| A_68_P25610231 | chr7:152128709-152128753                          | NM_007631:-2900          | Cend1         | PROMOTER               | 0.364                                                        | 0.447                          | 1161.38            | 519.42             | 0.163                          | 858.28             | 139.89             |
| A_68_P31485624 | chr18:9449444-9449488                             | NM_026484:682            | Cenp          | INSIDE                 | 0.364                                                        | 0.626                          | 1079.22            | 675.59             | 0.228                          | 843.35             | 192.32             |
| A_68_P25587939 | chr7:148477922-148477966                          | NM_007878:40             | Drd4          | INSIDE                 | 0.364                                                        | 0.465                          | 1820.17            | 847.17             | 0.169                          | 1494.82            | 252.94             |
| A_68_P26954163 | chr10:13686795-13686839                           | NM_010437:632            | Hivep2        | INSIDE                 | 0.364                                                        | 0.539                          | 1026.28            | 553.65             | 0.197                          | 946.65             | 186.06             |
| A_68_P21233127 | chr2:55289729-55289773                            | NM_008426:184            | Kcnj3         | INSIDE                 | 0.364                                                        | 0.622                          | 1796.23            | 1116.79            | 0.226                          | 1390.13            | 314.43             |
| A_68_P20042289 | chr1:13650498-13650542                            | NM_145381:70             | Lactb2        | INSIDE                 | 0.364                                                        | 0.613                          | 1278.27            | 783.69             | 0.223                          | 1015.13            | 226.65             |
| A_68_P24994037 | chr7:20147028-20147077                            | NM_199149:695            | Lrrc68        | INSIDE                 | 0.364                                                        | 0.492                          | 1095.27            | 538.91             | 0.179                          | 832.16             | 149.23             |
| A_68_P23894277 | chr5:92864276-92864320                            | NM_183392:-73            | Nup54         | PROMOTER               | 0.364                                                        | 0.633                          | 1620.81            | 1026.47            | 0.231                          | 1304.06            | 301.01             |
| A_68_P27311093 | chr10:85379465-85379509                           | NM_181650:204            | Prdm4         | INSIDE                 | 0.364                                                        | 0.420                          | 1790.11            | 751.12             | 0.153                          | 1539.97            | 235.30             |
| A_68_P22411529 | chr3:108060296-108060340                          | NM_011967:475            | Psmc5         | INSIDE                 | 0.364                                                        | 0.576                          | 1211.32            | 697.48             | 0.210                          | 1021.59            | 214.14             |
| A_68_P20557415 | chr1:121401606-121401656                          | NM_022327:-271           | Ralb          | PROMOTER               | 0.364                                                        | 0.498                          | 1170.49            | 582.38             | 0.181                          | 884.83             | 160.09             |
| A_68_P26588678 | chr9:6547771-65477764                             | NM_028030:-651           | Rbpm2         | PROMOTER               | 0.364                                                        | 0.429                          | 1876.50            | 804.27             | 0.156                          | 1567.11            | 244.47             |
| A_68_P23328509 | chr4:134989508-134989552                          | NM_022980:190            | Recan3        | INSIDE                 | 0.364                                                        | 0.663                          | 1405.51            | 931.59             | 0.241                          | 1138.84            | 275.03             |
| A_68_P26717018 | chr9:90165190-90165234                            | NM_194334:395            | Tbc1d2b       | INSIDE                 | 0.364                                                        | 0.392                          | 1692.75            | 663.34             | 0.143                          | 1481.25            | 211.49             |
| A_68_P21069043 | chr2:24817956-24818000                            | NM_026044:37             | Wdr85         | INSIDE                 | 0.364                                                        | 0.709                          | 2243.20            | 1589.40            | 0.258                          | 1843.84            | 475.47             |
| A_68_P25042342 | chr7:34918494-34918538                            | NM_207212:-229           | Wtip          | PROMOTER               | 0.364                                                        | 0.525                          | 2836.45            | 1489.36            | 0.191                          | 2244.05            | 429.00             |
| A_68_P31469352 | chr18:5591749-5591796                             | NM_011546:-116           | Zeb1          | PROMOTER               | 0.364                                                        | 0.627                          | 1055.27            | 661.74             | 0.228                          | 870.77             | 198.86             |
| A_68_P23590567 | chr5:34035431-34035475                            | AK172441:89934           |               | INSIDE                 | 0.364                                                        | 0.688                          | 1155.60            | 795.45             | 0.250                          | 972.46             | 243.58             |
| A_68_P24617829 | chr6:87682986-87683030                            | NM_001159697:2146        | Ccdc48        | INSIDE                 | 0.363                                                        | 0.632                          | 1753.37            | 1108.15            | 0.229                          | 1543.22            | 354.13             |
| A_68_P20551457 | chr1:120286262-120286306                          | NM_001081276:650         | Clasp1        | INSIDE                 | 0.363                                                        | 0.575                          | 2595.78            | 1492.91            | 0.209                          | 2048.58            | 427.43             |
| A_68_P28610002 | chr12:87763647-87763691                           | NM_011934:1075           | Esrrb         | INSIDE                 | 0.363                                                        | 0.588                          | 2445.88            | 1437.16            | 0.213                          | 1696.19            | 362.02             |
| A_68_P28157765 | chr11:116029229-116029273                         | NM_172571:242            | Fbfl          | INSIDE                 | 0.363                                                        | 0.488                          | 2357.68            | 1150.60            | 0.177                          | 1831.93            | 324.14             |
| A_68_P28158431 | chr11:116142573-116142617                         | NM_010254:342            | Galr2         | INSIDE                 | 0.363                                                        | 0.476                          | 1565.55            | 745.74             | 0.173                          | 1209.65            | 208.96             |
| A_68_P27315611 | chr10:86167975-86168019                           | NM_011631:193            | Hsp90b1       | INSIDE                 | 0.363                                                        | 0.537                          | 1931.18            | 1037.46            | 0.195                          | 1607.35            | 313.11             |
| A_68_P30676660 | chr16:36694130-36694174                           | NM_134109:29             | Ildr1         | INSIDE                 | 0.363                                                        | 0.478                          | 1591.35            | 760.33             | 0.173                          | 1257.76            | 217.96             |
| A_68_P25952871 | chr8:73119135-73119179                            | NM_023627:777            | Isyna1        | INSIDE                 | 0.363                                                        | 1.400                          | 1995.11            | 2794.07            | 0.509                          | 1512.14            | 769.49             |
| A_68_P29668832 | chr14:65271520-65271564                           | NM_001081177:175         | Kif13b        | INSIDE                 | 0.363                                                        | 0.514                          | 2830.97            | 1454.50            | 0.186                          | 2398.24            | 447.04             |
| A_68_P28048328 | chr11:96902741-96902785                           | NM_027026:-79            | Lrrc46        | DIVERGENT_PROMOTER     | 0.363                                                        | 0.485                          | 1848.56            | 896.38             | 0.176                          | 1751.10            | 308.14             |
| A_68_P29646483 | chr14:61403303-61403351                           | NM_027436:-76            | Mipep         | PROMOTER               | 0.363                                                        | 0.587                          | 1104.41            | 648.00             | 0.213                          | 803.94             | 171.19             |
| A_68_P29773644 | chr14:84845775-84845819                           | NM_001013753:2427        | Pedh17        | INSIDE                 | 0.363                                                        | 0.422                          | 2016.17            | 850.23             | 0.153                          | 1558.98            | 238.72             |
| A_68_P29482952 | chr14:27488079-27488123                           | NM_178668:1232           | Pde12         | INSIDE                 | 0.363                                                        | 0.480                          | 1875.53            | 900.54             | 0.174                          | 1450.80            | 252.82             |
| A_68_P28057823 | chr11:98544328-98544372                           | NM_009439:483            | Psmc3         | INSIDE                 | 0.363                                                        | 0.643                          | 1843.14            | 1185.27            | 0.233                          | 1357.88            | 316.61             |
| A_68_P26605678 | chr9:68502422-68502466                            | NM_013646:836            | Rora          | INSIDE                 | 0.363                                                        | 0.530                          | 2074.71            | 1099.56            | 0.193                          | 1711.75            | 329.55             |
| A_68_P28963699 | chr13:39052582-39052626                           | NM_001170430:-198        | Slc35b3       | PROMOTER               | 0.363                                                        | 0.673                          | 1247.85            | 839.95             | 0.244                          | 981.07             | 239.84             |
| A_68_P25581334 | chr7:147129626-147129670                          | NM_009482:-106           | Utf1          | PROMOTER               | 0.363                                                        | 0.470                          | 3752.43            | 1762.33            | 0.170                          | 2832.98            | 482.46             |
| A_68_P25063501 | chr7:38555245-38555289                            | NM_172385:-495           | Zfp536        | PROMOTER               | 0.363                                                        | 0.675                          | 1965.18            | 1325.54            | 0.245                          | 1624.38            | 397.88             |
| A_68_P21810970 | chr2:163029056-163029100                          | ENSMUST00000128999:-1210 |               | PROMOTER               | 0.363                                                        | 0.618                          | 5459.74            | 3376.28            | 0.224                          | 4376.05            | 981.33             |
| A_68_P25594227 | chr7:149558369-149558413                          | NM_177265:-226           | 6330512M04Rik | PROMOTER               | 0.362                                                        | 1.697                          | 3354.54            | 5691.01            | 0.614                          | 2329.28            | 1430.01            |
| A_68_P24455804 | chr6:53237462-53237506                            | NR_015553:196            | 9430076C15Rik | INSIDE                 | 0.362                                                        | 0.441                          | 1507.71            | 665.62             | 0.160                          | 1198.21            | 191.54             |

| ProbeName      | Target position of probe on CpG island microarray | TargetID            | GeneSymbol    | CpG island Description | Ratio of relative methylation (TiO <sub>2</sub> -NP/Vehicle) | Sham group                     |                    |                    | TiO <sub>2</sub> -H group      |                    |                    |
|----------------|---------------------------------------------------|---------------------|---------------|------------------------|--------------------------------------------------------------|--------------------------------|--------------------|--------------------|--------------------------------|--------------------|--------------------|
|                |                                                   |                     |               |                        |                                                              | Relative methylation (Cy5/Cy3) | Cy3 signal (Input) | Cy5 signal (MeDIP) | Relative methylation (Cy5/Cy3) | Cy3 signal (Input) | Cy5 signal (MeDIP) |
| A_68_P23456811 | chr5:5664103-5664147                              | NM_172447:108       | A330021E22Rik | INSIDE                 | 0.362                                                        | 0.682                          | 1203.11            | 820.16             | 0.247                          | 905.36             | 223.21             |
| A_68_P20596873 | chr1:129670505-129670549                          | NM_028399:-214      | Cent2         | PROMOTER               | 0.362                                                        | 0.696                          | 1897.84            | 1321.27            | 0.252                          | 1332.43            | 335.56             |
| A_68_P30109623 | chr15:30576998-30577042                           | NM_008729:474673    | Ctndd2        | INSIDE                 | 0.362                                                        | 0.407                          | 1353.05            | 550.99             | 0.148                          | 980.81             | 144.78             |
| A_68_P32328376 | chrX:35918353-35918397                            | NM_001110142:10999  | Cul4b         | INSIDE                 | 0.362                                                        | 4.458                          | 5368.72            | 23933.97           | 1.613                          | 2521.92            | 4067.59            |
| A_68_P25477510 | chr7:129276573-129276617                          | NM_021608:40        | Detn5         | INSIDE                 | 0.362                                                        | 0.494                          | 1506.41            | 744.10             | 0.179                          | 1229.40            | 219.58             |
| A_68_P23803966 | chr5:74931407-74931451                            | NM_001159573:-78    | Fip111        | DIVERGENT_PROMOTER     | 0.362                                                        | 0.678                          | 2028.43            | 1376.00            | 0.245                          | 1754.68            | 430.30             |
| A_68_P26244129 | chr8:126756057-126756101                          | NM_139272:785       | Galnt2        | INSIDE                 | 0.362                                                        | 0.568                          | 2036.88            | 1156.20            | 0.205                          | 1543.13            | 317.06             |
| A_68_P24449404 | chr6:52196424-52196469                            | NM_010450:-680      | Hoxa11        | PROMOTER               | 0.362                                                        | 0.568                          | 1406.16            | 799.17             | 0.206                          | 962.44             | 197.83             |
| A_68_P23270091 | chr4:124428867-124428911                          | NM_008385:9767      | Inpp5b        | INSIDE                 | 0.362                                                        | 0.653                          | 4855.24            | 3170.40            | 0.236                          | 3669.14            | 867.58             |
| A_68_P27143272 | chr10:53349951-53349995                           | NM_027830:273       | Mcm9          | INSIDE                 | 0.362                                                        | 1.819                          | 5783.79            | 10523.23           | 0.659                          | 3906.06            | 2574.75            |
| A_68_P31753488 | chr18:60934010-60934054                           | NM_020600:-217      | Rps14         | PROMOTER               | 0.362                                                        | 0.383                          | 1605.60            | 615.28             | 0.139                          | 1190.38            | 165.27             |
| A_68_P31142312 | chr17:31992898-31992942                           | NM_010831:-183      | Sik1          | PROMOTER               | 0.362                                                        | 0.545                          | 1357.06            | 739.91             | 0.197                          | 1298.38            | 256.01             |
| A_68_P28535628 | chr12:74213900-74213944                           | NM_011382:310       | Six4          | INSIDE                 | 0.362                                                        | 0.564                          | 2662.05            | 1501.38            | 0.204                          | 2072.53            | 422.87             |
| A_68_P27480106 | chr10:116661162-116661206                         | NM_026570:379       | Yeats4        | INSIDE                 | 0.362                                                        | 0.398                          | 1735.68            | 690.14             | 0.144                          | 1541.08            | 221.81             |
| A_68_P30382915 | chr15:82176602-82176646                           | NM_026914:149       | 1500032L24Rik | INSIDE                 | 0.361                                                        | 0.585                          | 1133.20            | 662.59             | 0.211                          | 926.82             | 195.82             |
| A_68_P26584998 | chr9:64808639-64808683                            | NM_175153:-83       | 2010321M09Rik | PROMOTER               | 0.361                                                        | 0.740                          | 2850.46            | 2110.58            | 0.268                          | 2164.57            | 579.04             |
| A_68_P32100295 | chr19:38298465-38298509                           | NM_001081075:136    | 5730455O13Rik | INSIDE                 | 0.361                                                        | 0.520                          | 1351.82            | 702.50             | 0.187                          | 1104.35            | 206.90             |
| A_68_P21782540 | chr2:158187149-158187193                          | NR_015463:75        | 9430008C03Rik | INSIDE                 | 0.361                                                        | 0.611                          | 1703.82            | 1041.43            | 0.221                          | 1310.07            | 289.15             |
| A_68_P30668268 | chr16:35154633-35154677                           | NM_001012765:-1067  | Adey5         | PROMOTER               | 0.361                                                        | 0.385                          | 3579.63            | 1378.53            | 0.139                          | 2871.51            | 399.14             |
| A_68_P24766252 | chr6:114593333-114593377                          | NM_028835:212       | Atg7          | INSIDE                 | 0.361                                                        | 0.552                          | 1095.39            | 605.07             | 0.200                          | 843.59             | 168.36             |
| A_68_P28680556 | chr12:101437490-101437534                         | NM_009790:-238      | Calm1         | PROMOTER               | 0.361                                                        | 0.354                          | 2330.47            | 824.17             | 0.128                          | 1909.05            | 243.64             |
| A_68_P22752470 | chr4:15872272-15872316                            | NM_026172:360       | Deer1         | INSIDE                 | 0.361                                                        | 0.715                          | 5079.40            | 3632.75            | 0.258                          | 4058.78            | 1046.83            |
| A_68_P32030716 | chr19:25684536-25684580                           | NM_177360:-468      | Dmrt3         | PROMOTER               | 0.361                                                        | 0.667                          | 1409.09            | 939.16             | 0.241                          | 1098.30            | 264.44             |
| A_68_P21439331 | chr2:93998296-93998341                            | NM_019657:-252      | Hsd17b12      | PROMOTER               | 0.361                                                        | 0.543                          | 1429.19            | 775.83             | 0.196                          | 1119.20            | 219.20             |
| A_68_P22324048 | chr3:90035364-90035413                            | NM_206924:-130      | Jtb           | PROMOTER               | 0.361                                                        | 0.661                          | 985.75             | 651.65             | 0.239                          | 748.87             | 178.96             |
| A_68_P24182265 | chr5:149740293-149740337                          | NM_153572:-91       | Katnal1       | PROMOTER               | 0.361                                                        | 0.641                          | 1163.83            | 745.85             | 0.231                          | 980.94             | 226.82             |
| A_68_P20353555 | chr1:75366170-75366222                            | NR_037976:5394      | LOC100503248  | INSIDE                 | 0.361                                                        | 1.945                          | 2112.18            | 4107.44            | 0.702                          | 1463.37            | 1026.86            |
| A_68_P21309978 | chr2:69424022-69424066                            | NM_001081088:80     | Lrp2          | INSIDE                 | 0.361                                                        | 0.507                          | 1148.82            | 582.30             | 0.183                          | 912.84             | 166.90             |
| A_68_P21579978 | chr2:121114942-121114992                          | NM_032393:-371      | Mtap1a        | PROMOTER               | 0.361                                                        | 0.485                          | 1371.23            | 664.89             | 0.175                          | 1114.24            | 195.15             |
| A_68_P30650229 | chr16:31948693-31948737                           | NM_026554:83        | Ncbp2         | INSIDE                 | 0.361                                                        | 0.627                          | 861.15             | 539.74             | 0.226                          | 686.61             | 155.30             |
| A_68_P27930798 | chr11:76057462-76057506                           | NM_183263:247       | Rnm11         | INSIDE                 | 0.361                                                        | 0.646                          | 1022.85            | 660.68             | 0.233                          | 792.69             | 184.63             |
| A_68_P30653349 | chr16:32609415-32609459                           | NM_011638:455       | Tfrc          | INSIDE                 | 0.361                                                        | 0.620                          | 1844.75            | 1144.05            | 0.224                          | 1438.90            | 321.89             |
| A_68_P31675646 | chr18:46371668-46371712                           | NM_178872:571       | Trim36        | INSIDE                 | 0.361                                                        | 0.384                          | 2178.47            | 836.93             | 0.139                          | 1795.39            | 248.86             |
| A_68_P28729765 | chr12:109996083-109996127                         |                     |               | Unknown                | 0.361                                                        | 0.619                          | 2317.95            | 1434.58            | 0.223                          | 1833.24            | 409.44             |
| A_68_P25007501 | chr7:25733865-25733909                            |                     |               | Unknown                | 0.361                                                        | 0.616                          | 1386.20            | 854.13             | 0.222                          | 1143.68            | 254.25             |
| A_68_P25415072 | chr7:117911998-117912042                          | NM_009667:-4097     | Ampd3         | PROMOTER               | 0.360                                                        | 0.535                          | 1828.63            | 977.71             | 0.193                          | 1638.59            | 315.51             |
| A_68_P30499085 | chr15:102501421-102501465                         | NM_026468:36        | Atp5g2        | INSIDE                 | 0.360                                                        | 0.503                          | 1158.87            | 583.29             | 0.181                          | 975.92             | 176.77             |
| A_68_P28184671 | chr11:120319473-120319517                         | NM_152807:52        | Ccdc137       | INSIDE                 | 0.360                                                        | 0.574                          | 2047.05            | 1174.06            | 0.206                          | 1632.56            | 336.62             |
| A_68_P22882387 | chr4:45355569-45355613                            | NM_153167:618       | Deaf10        | INSIDE                 | 0.360                                                        | 0.511                          | 1542.50            | 788.61             | 0.184                          | 1163.88            | 214.04             |
| A_68_P24213705 | chr6:5955978-5956022                              | NM_001191023:280362 | Dync11l       | INSIDE                 | 0.360                                                        | 0.613                          | 1716.96            | 1051.72            | 0.220                          | 1371.21            | 302.34             |
| A_68_P26612672 | chr9:69607372-69607416                            | NM_022378:1353      | Foxb1         | INSIDE                 | 0.360                                                        | 0.654                          | 1741.68            | 1139.07            | 0.236                          | 1300.54            | 306.29             |
| A_68_P28080440 | chr11:102467429-102467473                         | NM_020510:1706      | Fzd2          | INSIDE                 | 0.360                                                        | 0.368                          | 2575.05            | 946.93             | 0.132                          | 1850.97            | 244.83             |
| A_68_P23592735 | chr5:34511958-34512002                            | NM_146159:93        | Haus3         | INSIDE                 | 0.360                                                        | 0.510                          | 2132.18            | 1087.18            | 0.184                          | 1650.10            | 303.13             |
| A_68_P28279803 | chr12:21292038-21292083                           | NM_008403:38        | Igfb1bp1      | INSIDE                 | 0.360                                                        | 0.582                          | 1324.20            | 770.93             | 0.210                          | 996.58             | 208.90             |
| A_68_P28513154 | chr12:70269870-70269914                           | NM_001081406:92     | Lrr1          | INSIDE                 | 0.360                                                        | 0.440                          | 1601.40            | 703.86             | 0.158                          | 1276.28            | 202.13             |
| A_68_P31827988 | chr18:73975355-73975399                           | NM_145494:-330      | Me2           | PROMOTER               | 0.360                                                        | 0.639                          | 2932.55            | 1873.53            | 0.230                          | 2291.93            | 527.23             |
| A_68_P20849640 | chr1:177622720-177622764                          | NM_010098:-21       | Opn3          | DIVERGENT_PROMOTER     | 0.360                                                        | 0.638                          | 877.37             | 559.53             | 0.230                          | 784.04             | 180.03             |
| A_68_P25366411 | chr7:107376423-107376469                          | NM_027629:330       | Pgm211        | INSIDE                 | 0.360                                                        | 0.548                          | 1061.66            | 581.90             | 0.197                          | 888.06             | 175.38             |
| A_68_P20956473 | chr1:196446359-196446403                          | NM_008882:358       | Plxna2        | INSIDE                 | 0.360                                                        | 0.514                          | 1066.96            | 548.68             | 0.185                          | 944.67             | 175.10             |
| A_68_P24034079 | chr5:120131042-120131086                          | NM_011535:10387     | Tbx3          | INSIDE                 | 0.360                                                        | 0.706                          | 2245.57            | 1586.31            | 0.255                          | 1559.85            | 397.14             |
| A_68_P23991446 | chr5:112755370-112755414                          | NM_018783:4         | Ttip11        | INSIDE                 | 0.360                                                        | 0.584                          | 1880.97            | 1097.98            | 0.210                          | 1351.56            | 284.16             |

| ProbeName      | Target position of probe on CpG island microarray | TargetID           | GeneSymbol    | CpG island Description | Ratio of relative methylation (TiO <sub>2</sub> -NP/Vehicle) | Sham group                     |                    |                    | TiO <sub>2</sub> -H group      |                    |                    |
|----------------|---------------------------------------------------|--------------------|---------------|------------------------|--------------------------------------------------------------|--------------------------------|--------------------|--------------------|--------------------------------|--------------------|--------------------|
|                |                                                   |                    |               |                        |                                                              | Relative methylation (Cy5/Cy3) | Cy3 signal (Input) | Cy5 signal (MeDIP) | Relative methylation (Cy5/Cy3) | Cy3 signal (Input) | Cy5 signal (MeDIP) |
| A_68_P20354345 | chr1:75476353-75476397                            | NM_177056:268      | Tmem198       | INSIDE                 | 0.360                                                        | 0.629                          | 2696.14            | 1696.53            | 0.227                          | 1869.52            | 423.62             |
| A_68_P22015879 | chr3:28162505-28162549                            | NM_001163009:391   | Tnik          | INSIDE                 | 0.360                                                        | 0.558                          | 1455.69            | 812.90             | 0.201                          | 1111.03            | 223.27             |
| A_68_P25956520 | chr8:73891092-73891136                            | NM_025917:-1       | Use1          | PROMOTER               | 0.360                                                        | 0.672                          | 1224.42            | 823.05             | 0.242                          | 876.07             | 212.00             |
| A_68_P31952190 | chr19:10763362-10763406                           | NM_181403:80       | Vps37c        | INSIDE                 | 0.360                                                        | 0.419                          | 2333.19            | 977.40             | 0.151                          | 1928.16            | 290.51             |
| A_68_P26011369 | chr8:85298048-85298092                            | NM_145600:-45      | Zfp330        | PROMOTER               | 0.360                                                        | 0.351                          | 1589.13            | 558.40             | 0.127                          | 1315.68            | 166.53             |
| A_68_P29258005 | chr13:99274267-99274314                           | AK135687:84155     |               | INSIDE                 | 0.360                                                        | 0.528                          | 1368.52            | 723.07             | 0.190                          | 1005.85            | 191.27             |
| A_68_P24872790 | chr6:136419536-136419580                          | AK139818:7006      |               | DOWNSTREAM             | 0.360                                                        | 0.576                          | 3420.64            | 1969.12            | 0.207                          | 2700.33            | 559.33             |
| A_68_P28068584 | chr11:100389186-100389230                         | NM_001199296:106   | Acly          | INSIDE                 | 0.359                                                        | 0.592                          | 1045.30            | 618.30             | 0.212                          | 773.14             | 164.29             |
| A_68_P23237358 | chr4:117599846-117599890                          | NM_009711:2500     | Artn          | INSIDE                 | 0.359                                                        | 0.564                          | 1056.45            | 596.23             | 0.202                          | 882.24             | 178.51             |
| A_68_P31791364 | chr18:67503647-67503691                           | NR_033214:89       | B430212C06Rik | INSIDE                 | 0.359                                                        | 0.645                          | 4521.54            | 2917.14            | 0.231                          | 3609.29            | 834.84             |
| A_68_P28302020 | chr12:27154103-27154147                           | NM_020557:45       | Cmpk2         | INSIDE                 | 0.359                                                        | 0.521                          | 1941.54            | 1011.62            | 0.187                          | 1587.41            | 297.21             |
| A_68_P27297057 | chr10:82823167-82823211                           | NM_026579:223      | D10Wsu102e    | INSIDE                 | 0.359                                                        | 0.481                          | 2993.75            | 1439.96            | 0.172                          | 2206.63            | 380.57             |
| A_68_P23362370 | chr4:140695629-140695673                          | NM_001025608:61    | D4Erd22e      | INSIDE                 | 0.359                                                        | 0.621                          | 2261.43            | 1403.38            | 0.223                          | 1703.32            | 379.66             |
| A_68_P21774638 | chr2:156832712-156832756                          | NM_025853:77       | Dsn1          | INSIDE                 | 0.359                                                        | 0.581                          | 1832.53            | 1065.41            | 0.209                          | 1547.20            | 322.82             |
| A_68_P28252857 | chr12:14158564-14158621                           | NM_029007:252      | Fam84a        | INSIDE                 | 0.359                                                        | 0.700                          | 1266.96            | 887.11             | 0.252                          | 789.74             | 198.64             |
| A_68_P26085828 | chr8:98412281-98412325                            | NM_010325:-37      | Got2          | PROMOTER               | 0.359                                                        | 0.707                          | 2729.09            | 1929.90            | 0.254                          | 2056.67            | 521.77             |
| A_68_P21809532 | chr2:162769099-162769143                          | NM_001081338:-80   | L3mbt1        | PROMOTER               | 0.359                                                        | 0.395                          | 2115.44            | 834.65             | 0.142                          | 1587.72            | 225.04             |
| A_68_P29330805 | chr13:112598506-112598550                         | NM_011945:663      | Map3k1        | INSIDE                 | 0.359                                                        | 0.432                          | 2163.06            | 934.12             | 0.155                          | 1715.14            | 265.84             |
| A_68_P24258182 | chr6:15671365-15671410                            | NM_175088:727      | Mdfic         | INSIDE                 | 0.359                                                        | 0.494                          | 1383.43            | 683.28             | 0.177                          | 1037.11            | 183.71             |
| A_68_P28504593 | chr12:68322368-68322415                           | NM_001193266:1145  | Mdga2         | INSIDE                 | 0.359                                                        | 1.495                          | 2753.81            | 4116.16            | 0.536                          | 1988.65            | 1066.51            |
| A_68_P22314345 | chr3:88340114-88340159                            | NM_001029890:3820  | Mex3a         | INSIDE                 | 0.359                                                        | 0.669                          | 1173.92            | 785.40             | 0.240                          | 815.67             | 195.79             |
| A_68_P32118992 | chr19:42165554-42165602                           | NM_145501:654      | Pi4k2a        | INSIDE                 | 0.359                                                        | 0.670                          | 1833.56            | 1228.50            | 0.241                          | 1273.81            | 306.48             |
| A_68_P23062644 | chr4:83131741-83131785                            | NM_133948:532      | Psip1         | INSIDE                 | 0.359                                                        | 0.513                          | 1767.20            | 906.00             | 0.184                          | 1327.78            | 244.70             |
| A_68_P24777649 | chr6:116623707-116623752                          | NM_178045:125      | Rassf4        | INSIDE                 | 0.359                                                        | 0.617                          | 1306.76            | 805.96             | 0.221                          | 923.35             | 204.47             |
| A_68_P24089368 | chr5:130007907-130007951                          | NM_172276:823      | Sfswap        | INSIDE                 | 0.359                                                        | 0.505                          | 1512.54            | 763.12             | 0.181                          | 1144.55            | 207.54             |
| A_68_P25950471 | chr8:72736718-72736765                            | NM_001007570:-561  | Sle25a42      | PROMOTER               | 0.359                                                        | 0.590                          | 1101.61            | 650.02             | 0.212                          | 813.20             | 172.39             |
| A_68_P22049393 | chr3:34549575-34549619                            | NM_011443:670      | Sox2          | INSIDE                 | 0.359                                                        | 0.676                          | 1895.61            | 1282.33            | 0.243                          | 1431.82            | 348.20             |
| A_68_P23991126 | chr5:112706061-112706105                          | NM_009419:356      | Tpst2         | INSIDE                 | 0.359                                                        | 0.547                          | 2099.86            | 1148.95            | 0.197                          | 1642.33            | 322.96             |
| A_68_P21311590 | chr2:69735990-69736034                            | NM_001081548:710   | Ubr3          | INSIDE                 | 0.359                                                        | 1.511                          | 6847.83            | 10349.14           | 0.543                          | 5104.77            | 2769.63            |
| A_68_P26238820 | chr8:125778693-125778737                          | NM_020497:620      | Zfp276        | INSIDE                 | 0.359                                                        | 0.630                          | 1063.44            | 669.45             | 0.226                          | 921.19             | 207.92             |
| A_68_P25505917 | chr7:134656518-134656562                          | NR_024331:-157     | 1700008J07Rik | PROMOTER               | 0.358                                                        | 0.593                          | 1447.69            | 857.94             | 0.212                          | 1201.80            | 254.90             |
| A_68_P26749713 | chr9:96789331-96789375                            | NM_153420:489      | Acp12         | INSIDE                 | 0.358                                                        | 0.567                          | 1211.53            | 687.33             | 0.203                          | 931.50             | 189.06             |
| A_68_P20149940 | chr1:36766481-36766525                            | NM_146107:268      | Actr1b        | INSIDE                 | 0.358                                                        | 0.442                          | 2835.28            | 1253.82            | 0.158                          | 2026.68            | 321.20             |
| A_68_P26055745 | chr8:93433140-93433184                            | NM_177224:80429    | Chd9          | INSIDE                 | 0.358                                                        | 0.393                          | 2705.33            | 1062.18            | 0.140                          | 2181.41            | 306.28             |
| A_68_P31286845 | chr17:63230423-63230467                           | NM_010109:222      | Efnaf5        | INSIDE                 | 0.358                                                        | 0.701                          | 2262.00            | 1584.83            | 0.251                          | 1591.00            | 399.54             |
| A_68_P25672217 | chr8:14090101-14090145                            | NM_001034862:205   | Erich1        | INSIDE                 | 0.358                                                        | 0.615                          | 2309.18            | 1420.87            | 0.220                          | 1697.74            | 374.12             |
| A_68_P26248321 | chr8:127420511-127420555                          | NM_198103:1073     | Exoc8         | INSIDE                 | 0.358                                                        | 1.456                          | 1115.06            | 1623.27            | 0.521                          | 904.14             | 471.20             |
| A_68_P31982708 | chr19:16947889-16947933                           | NM_008023:410      | Foxb2         | INSIDE                 | 0.358                                                        | 0.689                          | 1490.93            | 1026.98            | 0.247                          | 1092.31            | 269.29             |
| A_68_P31347823 | chr17:74058995-74059039                           | NM_027864:775      | Galnt14       | INSIDE                 | 0.358                                                        | 0.577                          | 2749.71            | 1586.43            | 0.207                          | 2015.92            | 416.95             |
| A_68_P23681255 | chr5:50449451-50449501                            | NM_133911:759      | Gpr125        | INSIDE                 | 0.358                                                        | 0.666                          | 1890.34            | 1259.88            | 0.238                          | 1368.67            | 326.31             |
| A_68_P24634427 | chr6:90686065-90686109                            | NM_001134384:74031 | Iqsec1        | INSIDE                 | 0.358                                                        | 0.691                          | 2105.16            | 1454.81            | 0.247                          | 1692.06            | 418.36             |
| A_68_P21233128 | chr2:55289837-55289883                            | NM_008426:294      | Kenj3         | INSIDE                 | 0.358                                                        | 0.376                          | 1784.59            | 671.01             | 0.135                          | 1342.96            | 180.69             |
| A_68_P31074423 | chr17:17761336-17761380                           | NM_172827:95       | Lnppe         | INSIDE                 | 0.358                                                        | 0.465                          | 2106.22            | 978.49             | 0.166                          | 1721.33            | 286.52             |
| A_68_P23270752 | chr4:124539019-124539063                          | NM_001007573:375   | Mancal        | INSIDE                 | 0.358                                                        | 0.505                          | 1459.73            | 736.51             | 0.181                          | 1129.54            | 203.96             |
| A_68_P25023455 | chr7:29551632-29551677                            | NM_010908:-111     | Nfkib         | DIVERGENT_PROMOTER     | 0.358                                                        | 0.514                          | 1476.67            | 759.70             | 0.184                          | 1146.83            | 211.30             |
| A_68_P32319273 | chrX:34138558-34138602                            | NM_016783:361      | Pgrmc1        | INSIDE                 | 0.358                                                        | 1.404                          | 1678.06            | 2355.96            | 0.502                          | 670.44             | 336.80             |
| A_68_P27673275 | chr11:29072187-29072231                           | NM_134034:-698     | Smek2         | PROMOTER               | 0.358                                                        | 0.319                          | 1615.34            | 515.58             | 0.114                          | 1184.98            | 135.40             |
| A_68_P21576016 | chr2:120393619-120393664                          | NM_001177792:235   | Snap23        | INSIDE                 | 0.358                                                        | 0.463                          | 1332.55            | 617.44             | 0.166                          | 1159.23            | 192.38             |
| A_68_P22871718 | chr4:43455695-43455739                            | NM_011571:568      | Tesk1         | INSIDE                 | 0.358                                                        | 0.440                          | 1213.47            | 533.81             | 0.157                          | 959.00             | 150.94             |
| A_68_P20076128 | chr1:21069108-21069152                            | NM_133252:160      | Tram2         | INSIDE                 | 0.358                                                        | 0.673                          | 900.90             | 606.18             | 0.241                          | 699.67             | 168.66             |
| A_68_P20046442 | chr1:14497242-14497286                            |                    | Unknown       |                        | 0.358                                                        | 0.709                          | 1487.96            | 1054.72            | 0.253                          | 1211.29            | 306.96             |

| ProbeName      | Target position of probe on CpG island microarray | TargetID                | GeneSymbol    | CpG island Description | Ratio of relative methylation (TiO <sub>2</sub> -NP/Vehicle) | Sham group                     |                    |                    | TiO <sub>2</sub> -H group      |                    |                    |
|----------------|---------------------------------------------------|-------------------------|---------------|------------------------|--------------------------------------------------------------|--------------------------------|--------------------|--------------------|--------------------------------|--------------------|--------------------|
|                |                                                   |                         |               |                        |                                                              | Relative methylation (Cy5/Cy3) | Cy3 signal (Input) | Cy5 signal (MeDIP) | Relative methylation (Cy5/Cy3) | Cy3 signal (Input) | Cy5 signal (MeDIP) |
| A_68_P22900664 | chr4:48553063-48553107                            | NM_028137:-286          | 5730528L13Rik | PROMOTER               | 0.357                                                        | 0.645                          | 1051.86            | 678.04             | 0.230                          | 752.36             | 172.96             |
| A_68_P25522114 | chr7:137663333-137663377                          | NM_013799:-301          | Ate1          | PROMOTER               | 0.357                                                        | 0.465                          | 1593.89            | 741.10             | 0.166                          | 1271.71            | 211.32             |
| A_68_P28727506 | chr12:109591095-109591139                         | NM_010010:18526         | Cyp46a1       | INSIDE                 | 0.357                                                        | 0.489                          | 1756.76            | 859.13             | 0.175                          | 1359.43            | 237.62             |
| A_68_P30479790 | chr15:99200609-99200653                           | NM_011711:-267          | Fnnl3         | INSIDE                 | 0.357                                                        | 0.491                          | 4277.39            | 2100.99            | 0.175                          | 3175.08            | 557.23             |
| A_68_P23607763 | chr5:36807446-36807491                            | NM_024478:-365          | Grpel1        | PROMOTER               | 0.357                                                        | 0.541                          | 3092.77            | 1672.04            | 0.193                          | 2365.57            | 457.16             |
| A_68_P27315607 | chr10:86167637-86167681                           | NM_011631:-531          | Hsp90b1       | INSIDE                 | 0.357                                                        | 0.549                          | 932.23             | 511.68             | 0.196                          | 762.34             | 149.49             |
| A_68_P30480286 | chr15:99288275-99288319                           | NM_001001884:-117       | Nekap5l       | PROMOTER               | 0.357                                                        | 0.659                          | 2150.11            | 1417.18            | 0.235                          | 1582.58            | 371.87             |
| A_68_P21909038 | chr2:180922669-180922713                          | NM_025598:643           | Ppdpf         | INSIDE                 | 0.357                                                        | 0.441                          | 1594.20            | 703.42             | 0.158                          | 1328.23            | 209.25             |
| A_68_P21769937 | chr2:156005990-156006034                          | NM_133242:-36           | Rbm39         | PROMOTER               | 0.357                                                        | 0.439                          | 1650.17            | 724.25             | 0.157                          | 1330.90            | 208.68             |
| A_68_P23234771 | chr4:117169165-117169209                          | NM_025739:334           | Rnf220        | INSIDE                 | 0.357                                                        | 0.406                          | 1995.83            | 810.02             | 0.145                          | 1517.42            | 219.67             |
| A_68_P26256736 | chr8:128822425-128822469                          | NM_175434:-32           | Slc35f3       | PROMOTER               | 0.357                                                        | 0.573                          | 3684.64            | 2113.05            | 0.205                          | 2919.91            | 597.22             |
| A_68_P20799887 | chr1:168309926-168309970                          | NM_030245:651           | Tada1         | INSIDE                 | 0.357                                                        | 0.628                          | 1726.09            | 1083.70            | 0.224                          | 1385.60            | 310.29             |
| A_68_P21072876 | chr2:25402210-25402254                            | NM_009422:182           | Traf2         | INSIDE                 | 0.357                                                        | 0.682                          | 2963.88            | 2022.28            | 0.244                          | 2354.67            | 574.25             |
| A_68_P27929274 | chr11:75779968-75780012                           |                         |               | Unknown                | 0.357                                                        | 0.735                          | 2387.28            | 1754.62            | 0.262                          | 1812.44            | 475.66             |
| A_68_P31621018 | chr18:36099359-36099403                           |                         |               | Unknown                | 0.357                                                        | 0.514                          | 1567.26            | 805.09             | 0.183                          | 1399.81            | 256.53             |
| A_68_P30214228 | chr15:51872101-51872145                           | NM_175503:470           | Aard          | INSIDE                 | 0.356                                                        | 0.516                          | 1477.57            | 762.35             | 0.183                          | 1221.35            | 224.04             |
| A_68_P22058285 | chr3:36374705-36374749                            | NM_009673:83            | Anxa5         | INSIDE                 | 0.356                                                        | 0.531                          | 2081.16            | 1105.66            | 0.189                          | 1468.31            | 277.93             |
| A_68_P31102143 | chr17:25321627-25321671                           | NM_183150:143           | BC003965      | INSIDE                 | 0.356                                                        | 0.693                          | 1465.43            | 1015.66            | 0.247                          | 1277.64            | 315.45             |
| A_68_P30976751 | chr16:93608089-93608133                           | NM_007620:29            | Cbr1          | INSIDE                 | 0.356                                                        | 0.552                          | 1337.60            | 738.25             | 0.196                          | 1234.39            | 242.53             |
| A_68_P30511525 | chr16:4679878-4679922                             | NM_030205:-180          | Coro7         | DIVERGENT_PROMOTER     | 0.356                                                        | 0.547                          | 1226.56            | 670.80             | 0.194                          | 1036.47            | 201.52             |
| A_68_P20149810 | chr1:36748331-36748375                            | NM_009942:21            | Cox5b         | INSIDE                 | 0.356                                                        | 0.628                          | 2340.02            | 1468.56            | 0.223                          | 1593.40            | 356.01             |
| A_68_P29659269 | chr14:63741273-63741317                           | NM_007798:-7            | Ctsb          | PROMOTER               | 0.356                                                        | 0.737                          | 4175.57            | 3077.50            | 0.262                          | 3408.61            | 893.77             |
| A_68_P20578315 | chr1:125942392-125942436                          | NM_199021:-278          | Dpp10         | PROMOTER               | 0.356                                                        | 0.463                          | 2751.40            | 1273.57            | 0.165                          | 2109.16            | 347.79             |
| A_68_P24921910 | chr6:145197794-145197838                          | NM_021284:935           | Kras          | INSIDE                 | 0.356                                                        | 0.734                          | 1962.50            | 1439.52            | 0.261                          | 1309.32            | 341.84             |
| A_68_P21794498 | chr2:160193025-160193069                          | NM_010658:-245          | Mafb          | PROMOTER               | 0.356                                                        | 0.738                          | 4337.06            | 3202.29            | 0.263                          | 3253.79            | 855.16             |
| A_68_P25756477 | chr8:32279067-32279111                            | NM_026453:108           | Mak16         | INSIDE                 | 0.356                                                        | 0.664                          | 1383.78            | 919.33             | 0.237                          | 1017.34            | 240.89             |
| A_68_P27282971 | chr10:79862699-79862743                           | NM_013595:-496          | Mbd3          | PROMOTER               | 0.356                                                        | 0.579                          | 916.64             | 530.98             | 0.206                          | 663.01             | 136.66             |
| A_68_P25423375 | chr7:119369796-119369840                          | NM_001193305:469        | Mical2        | INSIDE                 | 0.356                                                        | 0.633                          | 1366.45            | 865.08             | 0.225                          | 1036.64            | 233.62             |
| A_68_P30346980 | chr15:76063274-76063318                           | NM_001163542:-1488      | Plec          | PROMOTER               | 0.356                                                        | 0.316                          | 3643.12            | 1151.50            | 0.112                          | 2691.64            | 302.46             |
| A_68_P23374046 | chr4:142802052-142802101                          | NM_001081355:536        | Prdm2         | INSIDE                 | 0.356                                                        | 0.623                          | 1062.06            | 661.45             | 0.222                          | 812.48             | 180.01             |
| A_68_P25030460 | chr7:31017038-31017082                            | NM_025548:-12           | Tbeb          | DIVERGENT_PROMOTER     | 0.356                                                        | 0.683                          | 1744.35            | 1192.22            | 0.243                          | 1387.00            | 337.08             |
| A_68_P24127041 | chr5:138125324-138125368                          | NM_178162:499           | Agfig2        | INSIDE                 | 0.355                                                        | 1.514                          | 3297.19            | 4992.30            | 0.538                          | 2537.47            | 1365.55            |
| A_68_P30337616 | chr15:74349537-74349581                           | NM_174991:2933          | Bai1          | INSIDE                 | 0.355                                                        | 0.591                          | 1613.67            | 954.27             | 0.210                          | 1301.66            | 273.33             |
| A_68_P28072387 | chr11:101035328-101035372                         | NM_007721:1407          | Cer10         | INSIDE                 | 0.355                                                        | 0.389                          | 2889.98            | 1123.43            | 0.138                          | 2081.47            | 287.14             |
| A_68_P25150558 | chr7:64642169-64642213                            | NM_008074:51            | Gabrg3        | INSIDE                 | 0.355                                                        | 0.651                          | 1083.07            | 704.54             | 0.231                          | 988.34             | 228.09             |
| A_68_P22788124 | chr4:24825414-24825458                            | NM_026742:207           | Ndufaf4       | INSIDE                 | 0.355                                                        | 0.524                          | 2453.41            | 1284.42            | 0.186                          | 1765.45            | 328.39             |
| A_68_P23198683 | chr4:108673036-108673080                          | NM_146150:-351          | Nrd1          | PROMOTER               | 0.355                                                        | 0.582                          | 4518.05            | 2629.68            | 0.206                          | 3154.75            | 650.95             |
| A_68_P24479722 | chr6:57642005-57642049                            | NM_025574:46            | Pigy          | INSIDE                 | 0.355                                                        | 0.466                          | 1127.04            | 524.97             | 0.166                          | 982.62             | 162.68             |
| A_68_P25953979 | chr8:73300434-73300478                            | NM_008841:155           | Pik3r2        | INSIDE                 | 0.355                                                        | 0.389                          | 1578.56            | 614.04             | 0.138                          | 1324.32            | 183.13             |
| A_68_P26702535 | chr9:86910781-86910825                            | NM_001037907:431        | Ripply2       | INSIDE                 | 0.355                                                        | 0.696                          | 2712.26            | 1887.62            | 0.247                          | 2398.42            | 591.77             |
| A_68_P26766654 | chr9:99775916-99775960                            | NM_011440:651           | Sox14         | INSIDE                 | 0.355                                                        | 0.531                          | 1665.50            | 883.77             | 0.188                          | 1293.35            | 243.31             |
| A_68_P24993486 | chr7:20055334-20055378                            | ENSMUST0000083454:-9072 |               | PROMOTER               | 0.355                                                        | 1.591                          | 764.29             | 1215.86            | 0.564                          | 667.29             | 376.32             |
| A_68_P31465565 | chr18:4920765-4920809                             | ENSMUST00000143254:-937 |               | PROMOTER               | 0.355                                                        | 0.446                          | 2253.15            | 1003.98            | 0.158                          | 1751.51            | 276.98             |
| A_68_P24358388 | chr6:34828039-34828083                            | NM_00113561:5           | 3110062M04Rik | INSIDE                 | 0.354                                                        | 0.388                          | 2876.05            | 1117.23            | 0.138                          | 2102.69            | 289.36             |
| A_68_P22186536 | chr3:62143169-62143213                            | NM_001081295:492        | Arhgef26      | INSIDE                 | 0.354                                                        | 0.261                          | 2043.42            | 533.31             | 0.092                          | 1705.32            | 157.56             |
| A_68_P24056085 | chr5:122952811-122952855                          | NM_009722:-598          | Atp2a2        | PROMOTER               | 0.354                                                        | 0.571                          | 2296.54            | 1311.45            | 0.202                          | 1599.57            | 323.01             |
| A_68_P25898923 | chr8:61391591-61391635                            | NM_173411:1061          | BC030500      | INSIDE                 | 0.354                                                        | 0.612                          | 1692.65            | 1035.71            | 0.217                          | 1269.62            | 275.38             |
| A_68_P29682515 | chr14:67627653-67627697                           | NM_009761:40            | Bnip3l        | INSIDE                 | 0.354                                                        | 0.494                          | 2395.59            | 1183.56            | 0.175                          | 1697.55            | 297.00             |
| A_68_P23590777 | chr5:34064147-34064191                            | NM_001163215:-204       | Fgfr3         | PROMOTER               | 0.354                                                        | 0.542                          | 989.97             | 536.39             | 0.192                          | 732.60             | 140.47             |
| A_68_P25971956 | chr8:77617525-77617569                            | NM_010442:30            | Hmox1         | INSIDE                 | 0.354                                                        | 0.623                          | 977.54             | 608.67             | 0.220                          | 790.71             | 174.17             |
| A_68_P28043948 | chr11:96205685-96205729                           | NM_010458:624           | Hoxb3         | INSIDE                 | 0.354                                                        | 0.495                          | 1421.11            | 703.43             | 0.175                          | 1108.68            | 194.20             |

| ProbeName      | Target position of probe on CpG island microarray | TargetID          | GeneSymbol    | CpG island Description | Ratio of relative methylation (TiO <sub>2</sub> -NP/Vehicle) | Sham group                     |                    |                    | TiO <sub>2</sub> -H group      |                    |                    |
|----------------|---------------------------------------------------|-------------------|---------------|------------------------|--------------------------------------------------------------|--------------------------------|--------------------|--------------------|--------------------------------|--------------------|--------------------|
|                |                                                   |                   |               |                        |                                                              | Relative methylation (Cy5/Cy3) | Cy3 signal (Input) | Cy5 signal (MeDIP) | Relative methylation (Cy5/Cy3) | Cy3 signal (Input) | Cy5 signal (MeDIP) |
| A_68_P20351506 | chr1:74997489-74997533                            | NM_010544:715     | lh            | INSIDE                 | 0.354                                                        | 0.591                          | 2779.98            | 1643.39            | 0.210                          | 2146.31            | 449.65             |
| A_68_P20285211 | chr1:63160025-63160069                            | NM_001081436:795  | Ino80d        | INSIDE                 | 0.354                                                        | 0.658                          | 1881.88            | 1237.76            | 0.233                          | 1522.45            | 354.36             |
| A_68_P31784506 | chr18:66162058-66162102                           | NM_027400:209     | Lman1         | INSIDE                 | 0.354                                                        | 0.575                          | 1069.30            | 614.96             | 0.204                          | 917.62             | 186.92             |
| A_68_P23192850 | chr4:107475564-107475608                          | NM_001080926:723  | Lrp8          | INSIDE                 | 0.354                                                        | 0.541                          | 1025.28            | 554.32             | 0.192                          | 940.55             | 180.21             |
| A_68_P26214833 | chr8:122099237-122099281                          | NM_026648:124     | Lrrc50        | INSIDE                 | 0.354                                                        | 0.650                          | 2180.92            | 1416.83            | 0.230                          | 1885.31            | 433.04             |
| A_68_P25537271 | chr7:140044033-140044077                          | NM_028095:276     | Meitl10       | INSIDE                 | 0.354                                                        | 0.616                          | 1386.53            | 854.61             | 0.218                          | 1115.54            | 243.58             |
| A_68_P27281287 | chr10:79611758-79611802                           | NM_021565:746     | Midn          | INSIDE                 | 0.354                                                        | 0.514                          | 2491.43            | 1281.64            | 0.182                          | 1725.91            | 314.69             |
| A_68_P24771973 | chr6:115552217-115552261                          | NM_023290:283     | Mkrm2         | INSIDE                 | 0.354                                                        | 0.694                          | 4289.30            | 2977.69            | 0.246                          | 3154.72            | 776.37             |
| A_68_P29446632 | chr14:21212949-21212993                           | NM_025440:-193    | Mrps16        | PROMOTER               | 0.354                                                        | 0.325                          | 2585.87            | 839.18             | 0.115                          | 2020.51            | 232.14             |
| A_68_P29453025 | chr14:22319120-22319164                           | NM_017479:136     | Myst4         | INSIDE                 | 0.354                                                        | 0.658                          | 2124.63            | 1398.55            | 0.233                          | 1702.60            | 396.53             |
| A_68_P20559034 | chr1:121734234-121734278                          | NM_019933:-608    | Ptpn4         | PROMOTER               | 0.354                                                        | 0.690                          | 1451.93            | 1001.36            | 0.244                          | 1060.00            | 258.69             |
| A_68_P31488616 | chr18:10181915-10181959                           | NM_009071:-146    | Rock1         | PROMOTER               | 0.354                                                        | 0.396                          | 1867.11            | 738.84             | 0.140                          | 1558.91            | 218.12             |
| A_68_P24328152 | chr6:29686394-29686438                            | NM_176996:920     | Smo           | INSIDE                 | 0.354                                                        | 0.516                          | 2644.16            | 1363.26            | 0.182                          | 1900.79            | 346.72             |
| A_68_P23061865 | chr4:82969752-82969796                            | NM_027238:319     | Ttc39b        | INSIDE                 | 0.354                                                        | 0.615                          | 1060.46            | 651.68             | 0.217                          | 895.67             | 194.79             |
| A_68_P26041029 | chr8:90977921-90977965                            |                   |               | Unknown                | 0.354                                                        | 0.646                          | 1336.41            | 863.11             | 0.229                          | 1041.25            | 238.25             |
| A_68_P30483171 | chr15:99804219-99804265                           | NR_028124:-524    | 2310068J16Rik | PROMOTER               | 0.353                                                        | 0.557                          | 1147.31            | 638.54             | 0.196                          | 923.45             | 181.41             |
| A_68_P31257262 | chr17:56749026-56749070                           | NM_153152:146     | 2410015M20Rik | INSIDE                 | 0.353                                                        | 0.592                          | 4505.74            | 2666.45            | 0.209                          | 3180.53            | 664.58             |
| A_68_P25954402 | chr8:73362864-73362908                            | NM_027560:733     | Ardec2        | INSIDE                 | 0.353                                                        | 0.510                          | 1134.57            | 578.25             | 0.180                          | 861.51             | 155.06             |
| A_68_P24104846 | chr5:133018497-133018541                          | NM_177047:-305    | Aut2          | PROMOTER               | 0.353                                                        | 0.448                          | 2293.45            | 1028.53            | 0.158                          | 1553.00            | 245.62             |
| A_68_P28175793 | chr11:118951344-118951390                         | NM_007625:-3815   | Cbx4          | PROMOTER               | 0.353                                                        | 1.551                          | 4847.13            | 7516.25            | 0.547                          | 3290.46            | 1798.99            |
| A_68_P28752827 | chr12:114066991-114067046                         | NM_028023:582     | Cdca4         | INSIDE                 | 0.353                                                        | 0.487                          | 1401.24            | 682.63             | 0.172                          | 1284.88            | 221.07             |
| A_68_P21569219 | chr2:119176997-119177041                          | NM_026929:41      | Chac1         | INSIDE                 | 0.353                                                        | 0.604                          | 2071.02            | 1251.04            | 0.213                          | 1652.42            | 352.12             |
| A_68_P32145764 | chr19:46837127-46837172                           | NM_001102471:1051 | Cnmn2         | INSIDE                 | 0.353                                                        | 0.643                          | 939.54             | 603.88             | 0.227                          | 684.27             | 155.44             |
| A_68_P21818148 | chr2:164311684-164311728                          | NM_026797:-248    | Dbdd2         | PROMOTER               | 0.353                                                        | 0.450                          | 1293.28            | 582.22             | 0.159                          | 1044.82            | 166.10             |
| A_68_P29702477 | chr14:71018142-71018186                           | NM_013514:11797   | Epb4.9        | INSIDE                 | 0.353                                                        | 0.619                          | 1580.18            | 978.14             | 0.219                          | 1214.78            | 265.80             |
| A_68_P23318324 | chr4:133140609-133140653                          | NM_133884:343     | Gpn2          | INSIDE                 | 0.353                                                        | 0.556                          | 1487.26            | 826.96             | 0.196                          | 1219.44            | 239.12             |
| A_68_P31400025 | chr17:84030569-84030613                           | NM_153512:645     | Keng3         | INSIDE                 | 0.353                                                        | 1.389                          | 2456.92            | 3413.51            | 0.491                          | 1758.85            | 863.10             |
| A_68_P28292712 | chr12:25659767-25659811                           | NM_001081378:-8   | Kidins220     | PROMOTER               | 0.353                                                        | 0.596                          | 1392.40            | 829.48             | 0.211                          | 1030.84            | 217.06             |
| A_68_P20806518 | chr1:169618425-169618469                          | NM_033652:-1242   | Lmx1a         | PROMOTER               | 0.353                                                        | 0.668                          | 873.48             | 583.44             | 0.236                          | 656.47             | 154.73             |
| A_68_P27767867 | chr11:46250322-46250367                           | NM_001104530:-104 | Med7          | PROMOTER               | 0.353                                                        | 0.399                          | 1342.28            | 535.92             | 0.141                          | 1034.22            | 145.75             |
| A_68_P21240006 | chr2:56967343-56967388                            | NM_013613:84      | Nr4a2         | INSIDE                 | 0.353                                                        | 0.638                          | 2028.46            | 1294.99            | 0.226                          | 1598.35            | 360.64             |
| A_68_P20826590 | chr1:173126271-173126315                          | NM_025557:107     | Pep4l1        | INSIDE                 | 0.353                                                        | 0.406                          | 1496.51            | 607.24             | 0.143                          | 1375.90            | 196.87             |
| A_68_P31161701 | chr17:36053710-36053754                           | NM_175934:-123    | Ppp1r10       | DIVERGENT_PROMOTER     | 0.353                                                        | 0.690                          | 1629.09            | 1124.65            | 0.244                          | 1295.11            | 315.80             |
| A_68_P27568682 | chr11:6374896-6374940                             | NM_011221:1002    | Purb          | INSIDE                 | 0.353                                                        | 0.344                          | 4121.48            | 1416.41            | 0.121                          | 2880.64            | 349.66             |
| A_68_P21986761 | chr3:21975073-21975117                            | NM_030732:-479    | Tbl1xr1       | PROMOTER               | 0.353                                                        | 0.519                          | 2249.55            | 1167.90            | 0.183                          | 1855.31            | 339.58             |
| A_68_P21721821 | chr2:146839369-146839413                          | NM_011917:595     | Xrm2          | INSIDE                 | 0.353                                                        | 0.440                          | 1608.97            | 707.14             | 0.155                          | 1283.99            | 199.43             |
| A_68_P29478594 | chr14:26426870-26426915                           | NM_183208:148222  | Zmiz1         | INSIDE                 | 0.353                                                        | 0.525                          | 2428.51            | 1275.42            | 0.185                          | 1639.02            | 303.99             |
| A_68_P27498116 | chr10:119990083-119990128                         |                   |               | Unknown                | 0.353                                                        | 0.617                          | 866.96             | 534.53             | 0.217                          | 633.36             | 137.70             |
| A_68_P27223534 | chr10:68861479-68861523                           | AK029407:-20      |               | PROMOTER               | 0.353                                                        | 0.642                          | 1950.92            | 1253.00            | 0.227                          | 1496.17            | 339.24             |
| A_68_P28608855 | chr12:87582934-87582978                           | NM_027405:129     | 1700020O03Rik | INSIDE                 | 0.352                                                        | 0.698                          | 4032.55            | 2815.89            | 0.246                          | 3252.59            | 799.85             |
| A_68_P27851243 | chr11:61743609-61743653                           | NM_019921:98      | Akap10        | INSIDE                 | 0.352                                                        | 0.516                          | 2421.17            | 1248.76            | 0.182                          | 1779.02            | 323.01             |
| A_68_P30811313 | chr16:62846874-62846918                           | NM_026577:-30     | Arl13b        | DIVERGENT_PROMOTER     | 0.352                                                        | 0.563                          | 1751.08            | 985.69             | 0.198                          | 1531.81            | 303.94             |
| A_68_P25354432 | chr7:105343075-105343119                          | NM_001081167:4889 | B3gnt6        | INSIDE                 | 0.352                                                        | 0.593                          | 1579.08            | 937.11             | 0.209                          | 1334.57            | 278.92             |
| A_68_P28688781 | chr12:103213776-103213820                         | NM_016856:-385    | Cpsf2         | PROMOTER               | 0.352                                                        | 0.697                          | 2411.15            | 1679.69            | 0.245                          | 1947.31            | 477.31             |
| A_68_P28924020 | chr13:31712001-31712045                           | NM_010225:-5662   | Foxf2         | PROMOTER               | 0.352                                                        | 0.535                          | 1077.89            | 576.66             | 0.188                          | 951.86             | 179.28             |
| A_68_P21052789 | chr2:20890869-20890913                            | NR_033225:390     | Gm13375       | INSIDE                 | 0.352                                                        | 0.551                          | 1205.68            | 664.22             | 0.194                          | 1039.22            | 201.53             |
| A_68_P27987929 | chr11:86070620-86070664                           | NM_027421:428     | Ints2         | INSIDE                 | 0.352                                                        | 0.715                          | 2228.60            | 1593.16            | 0.252                          | 1750.76            | 440.53             |
| A_68_P31150390 | chr17:33896983-33897027                           | NM_008997:427     | Rab11b        | INSIDE                 | 0.352                                                        | 0.542                          | 3620.11            | 1963.30            | 0.191                          | 2748.19            | 524.49             |
| A_68_P22312702 | chr3:88045112-88045156                            | NM_021375:13472   | Rhbg          | DOWNSTREAM             | 0.352                                                        | 0.647                          | 817.10             | 528.52             | 0.228                          | 713.72             | 162.42             |
| A_68_P31560664 | chr18:24688268-24688312                           | NM_144861:415     | Rprd1a        | INSIDE                 | 0.352                                                        | 0.523                          | 1270.97            | 664.86             | 0.184                          | 1047.90            | 192.85             |
| A_68_P21078765 | chr2:26300767-26300811                            | NM_153125:-52     | Sec16a        | PROMOTER               | 0.352                                                        | 0.704                          | 3435.76            | 2419.82            | 0.248                          | 2631.82            | 652.80             |



| ProbeName      | Target position of probe on CpG island microarray | TargetID               | GeneSymbol    | CpG island Description | Ratio of relative methylation (TiO <sub>2</sub> -NP/Vehicle) | Sham group                     |                    |                    | TiO <sub>2</sub> -H group      |                    |                    |
|----------------|---------------------------------------------------|------------------------|---------------|------------------------|--------------------------------------------------------------|--------------------------------|--------------------|--------------------|--------------------------------|--------------------|--------------------|
|                |                                                   |                        |               |                        |                                                              | Relative methylation (Cy5/Cy3) | Cy3 signal (Input) | Cy5 signal (MeDIP) | Relative methylation (Cy5/Cy3) | Cy3 signal (Input) | Cy5 signal (MeDIP) |
| A_68_P29961839 | chr14:122863102-122863146                         | NM_022987:1756         | Zic5          | INSIDE                 | 0.352                                                        | 0.604                          | 916.24             | 552.97             | 0.212                          | 774.75             | 164.57             |
| A_68_P25940712 | chr8:70586026-70586070                            | ENSMUST00000150169:137 |               | INSIDE                 | 0.352                                                        | 0.610                          | 1837.81            | 1120.58            | 0.215                          | 1506.39            | 323.12             |
| A_68_P29998440 | chr15:8118886-8118930                             | NM_001162906:-197      | 2410089E03Rik | PROMOTER               | 0.351                                                        | 0.576                          | 1234.81            | 711.34             | 0.202                          | 1166.72            | 235.67             |
| A_68_P31111772 | chr17:26813424-26813468                           | NM_025272:106          | Atp6v0e       | INSIDE                 | 0.351                                                        | 0.352                          | 2011.81            | 708.90             | 0.124                          | 1616.33            | 200.07             |
| A_68_P24617811 | chr6:87680675-87680719                            | NM_001159697:-166      | Ccdc48        | PROMOTER               | 0.351                                                        | 0.727                          | 4984.09            | 3625.21            | 0.256                          | 3364.11            | 859.84             |
| A_68_P24159039 | chr5:144775595-144775639                          | NM_177682:106          | Cez1          | INSIDE                 | 0.351                                                        | 0.622                          | 2033.64            | 1265.35            | 0.219                          | 1557.24            | 340.40             |
| A_68_P26660362 | chr9:78463468-78463512                            | NM_153098:138          | Cd109         | INSIDE                 | 0.351                                                        | 0.433                          | 1680.35            | 727.12             | 0.152                          | 1438.78            | 218.80             |
| A_68_P31838825 | chr18:75856820-75856864                           | NM_201354:508          | Ctif          | INSIDE                 | 0.351                                                        | 0.478                          | 1876.78            | 897.37             | 0.168                          | 1354.08            | 227.25             |
| A_68_P28396959 | chr12:45310845-45310889                           | NM_013760:189          | Dnajb9        | INSIDE                 | 0.351                                                        | 0.633                          | 1982.31            | 1255.39            | 0.222                          | 1490.06            | 331.30             |
| A_68_P27612234 | chr11:16652279-16652323                           | NM_007912:95           | Egfr          | INSIDE                 | 0.351                                                        | 0.580                          | 936.29             | 543.40             | 0.204                          | 700.44             | 142.85             |
| A_68_P25416985 | chr7:118225708-118225752                          | NM_001040131:814       | Eif4g2        | INSIDE                 | 0.351                                                        | 0.601                          | 1018.69            | 611.78             | 0.211                          | 908.92             | 191.53             |
| A_68_P26761639 | chr9:98886751-98886795                            | NM_001122851:-19       | Faim          | PROMOTER               | 0.351                                                        | 0.484                          | 3000.49            | 1451.66            | 0.170                          | 2317.14            | 393.58             |
| A_68_P23787826 | chr5:72092511-72092555                            | NM_008069:1278         | Gabrb1        | INSIDE                 | 0.351                                                        | 0.641                          | 1713.97            | 1097.91            | 0.225                          | 1363.63            | 307.01             |
| A_68_P29072860 | chr13:58460543-58460587                           | NM_175214:-4341        | Kif27         | PROMOTER               | 0.351                                                        | 0.430                          | 4159.44            | 1787.57            | 0.151                          | 3206.66            | 484.26             |
| A_68_P22133744 | chr3:51906476-51906520                            | NM_001004176:2430      | Maml3         | INSIDE                 | 0.351                                                        | 0.675                          | 1006.00            | 679.14             | 0.237                          | 777.73             | 184.13             |
| A_68_P23188358 | chr4:106739774-106739823                          | NM_025500:-327         | Mrlp37        | DIVERGENT_PROMOTER     | 0.351                                                        | 0.625                          | 3049.70            | 1907.51            | 0.219                          | 2132.82            | 468.02             |
| A_68_P21750258 | chr2:152452780-152452824                          | NM_009047:59           | Rem1          | INSIDE                 | 0.351                                                        | 0.587                          | 986.89             | 579.11             | 0.206                          | 873.31             | 179.83             |
| A_68_P28520022 | chr12:71448035-71448079                           | NM_001110202:545       | Trim9         | INSIDE                 | 0.351                                                        | 0.558                          | 2268.98            | 1265.65            | 0.196                          | 1524.69            | 298.25             |
| A_68_P31936615 | chr19:6984479-6984523                             | NM_001166370:313       | Trmt112       | INSIDE                 | 0.351                                                        | 0.384                          | 1480.45            | 568.66             | 0.135                          | 1145.18            | 154.21             |
| A_68_P20599496 | chr1:130141494-130141539                          | NM_026390:759          | Ubxn4         | INSIDE                 | 0.351                                                        | 0.521                          | 1427.11            | 743.99             | 0.183                          | 1232.59            | 225.43             |
| A_68_P24595030 | chr6:83660707-83660751                            | NR_002873:198          | Vax2os1       | INSIDE                 | 0.351                                                        | 0.734                          | 2299.57            | 1688.85            | 0.258                          | 1778.87            | 458.13             |
| A_68_P25504685 | chr7:134377078-134377122                          | NM_146201:144          | Zfp553        | INSIDE                 | 0.351                                                        | 0.595                          | 3038.36            | 1807.63            | 0.209                          | 2190.21            | 457.91             |
| A_68_P31809747 | chr18:70631630-70631674                           | NM_172967:482          | 4930503L19Rik | INSIDE                 | 0.350                                                        | 0.589                          | 1543.07            | 908.65             | 0.206                          | 1154.66            | 237.68             |
| A_68_P23542799 | chr5:24082860-24082904                            | NM_001190443:403       | Abcf2         | INSIDE                 | 0.350                                                        | 0.633                          | 2273.51            | 1438.78            | 0.221                          | 1579.81            | 349.76             |
| A_68_P28431152 | chr12:52792067-52792111                           | NM_021710:136          | Ap4s1         | INSIDE                 | 0.350                                                        | 0.599                          | 1966.91            | 1177.34            | 0.209                          | 1515.36            | 317.08             |
| A_68_P23332631 | chr4:135762030-135762074                          | NM_001008232:-227      | Asap3         | PROMOTER               | 0.350                                                        | 1.625                          | 4946.21            | 8037.03            | 0.568                          | 3366.45            | 1912.69            |
| A_68_P25065442 | chr7:38892952-38892996                            | NM_007633:-465         | Cene1         | PROMOTER               | 0.350                                                        | 0.497                          | 4907.98            | 2437.19            | 0.174                          | 3349.10            | 581.82             |
| A_68_P22402364 | chr3:106350168-106350212                          | NM_133869:489          | Cept1         | INSIDE                 | 0.350                                                        | 0.711                          | 2349.11            | 1670.19            | 0.249                          | 1749.54            | 435.91             |
| A_68_P22318793 | chr3:89154296-89154340                            | NM_029974:14843        | Dest1         | INSIDE                 | 0.350                                                        | 0.467                          | 1404.13            | 655.56             | 0.163                          | 1222.06            | 199.72             |
| A_68_P28103522 | chr11:106650003-106650048                         | NM_007840:-217         | Ddx5          | DIVERGENT_PROMOTER     | 0.350                                                        | 0.460                          | 1898.40            | 874.02             | 0.161                          | 1414.98            | 228.26             |
| A_68_P26912795 | chr10:5914411-5914463                             | NR_002891:-2938        | Gm5512        | PROMOTER               | 0.350                                                        | 0.445                          | 1369.32            | 609.20             | 0.156                          | 961.81             | 149.71             |
| A_68_P24053342 | chr5:123439126-123439170                          | NM_001003953:-47       | Kdm2b         | PROMOTER               | 0.350                                                        | 0.595                          | 2810.70            | 1672.41            | 0.208                          | 1999.93            | 416.43             |
| A_68_P28049249 | chr11:97049576-97049622                           | NM_008379:-392         | Kpnb1         | PROMOTER               | 0.350                                                        | 0.517                          | 3594.87            | 1860.24            | 0.181                          | 2788.10            | 505.66             |
| A_68_P28154418 | chr11:115474202-115474246                         | NM_027162:-407         | Mif4gd        | PROMOTER               | 0.350                                                        | 0.730                          | 2201.37            | 1607.70            | 0.256                          | 1623.92            | 415.03             |
| A_68_P25111230 | chr7:56501781-56501825                            | NM_175272:244          | Nav2          | INSIDE                 | 0.350                                                        | 0.442                          | 2139.56            | 945.58             | 0.155                          | 1491.83            | 231.03             |
| A_68_P21018168 | chr2:13714756-13714800                            | NM_145838:369          | St8sia6       | INSIDE                 | 0.350                                                        | 0.542                          | 2894.52            | 1568.46            | 0.190                          | 2206.39            | 418.34             |
| A_68_P20352666 | chr1:75207636-75207680                            | NM_011494:255          | Stk16         | INSIDE                 | 0.350                                                        | 0.663                          | 1477.59            | 979.32             | 0.232                          | 1157.58            | 268.18             |
| A_68_P27383830 | chr10:98378401-98378445                           | NM_026482:637          | Atp2b1        | INSIDE                 | 0.349                                                        | 0.489                          | 1129.78            | 552.80             | 0.171                          | 981.17             | 167.42             |
| A_68_P24009177 | chr5:115799028-115799072                          | NM_007748:-86          | Cox6a1        | PROMOTER               | 0.349                                                        | 0.603                          | 1919.81            | 1157.42            | 0.210                          | 1453.08            | 305.38             |
| A_68_P27865450 | chr11:64250200-64250244                           | NR_028445:-46          | F930015N05Rik | PROMOTER               | 0.349                                                        | 0.551                          | 1324.97            | 729.95             | 0.192                          | 1103.99            | 212.10             |
| A_68_P23317810 | chr4:133035888-133035933                          | NM_175307:-137         | Fam46b        | PROMOTER               | 0.349                                                        | 0.567                          | 1302.78            | 738.54             | 0.198                          | 1004.61            | 198.83             |
| A_68_P32143272 | chr19:46403086-46403130                           | NM_133694:435          | Fbx115        | INSIDE                 | 0.349                                                        | 0.408                          | 2457.72            | 1003.19            | 0.143                          | 1919.29            | 273.60             |
| A_68_P23404323 | chr4:149475519-149475563                          | NM_177366:13929        | Gpr157        | INSIDE                 | 0.349                                                        | 1.558                          | 2216.23            | 3452.56            | 0.543                          | 1619.05            | 879.43             |
| A_68_P28079750 | chr11:102328735-102328779                         | NM_010575:2441         | Ltga2b        | INSIDE                 | 0.349                                                        | 0.617                          | 1324.91            | 817.38             | 0.215                          | 995.03             | 214.03             |
| A_68_P31863850 | chr18:80559762-80559806                           | NM_001190373:1209      | Keng2         | INSIDE                 | 0.349                                                        | 0.545                          | 2077.46            | 1131.85            | 0.190                          | 1568.32            | 297.86             |
| A_68_P31936766 | chr19:7008439-7008483                             | NM_008431:545          | Kenk4         | INSIDE                 | 0.349                                                        | 0.559                          | 2029.56            | 1134.32            | 0.195                          | 1337.02            | 261.08             |
| A_68_P26345199 | chr9:20843307-20843352                            | NR_035438:-6557        | Mir1900       | PROMOTER               | 0.349                                                        | 0.485                          | 1410.84            | 684.42             | 0.169                          | 1051.61            | 178.19             |
| A_68_P31424458 | chr17:88071727-88071771                           | NM_008628:-148         | Msh2          | PROMOTER               | 0.349                                                        | 0.557                          | 1109.81            | 618.20             | 0.194                          | 936.25             | 181.98             |
| A_68_P29962216 | chr14:122933648-122933692                         | NM_144844:121          | Pcca          | INSIDE                 | 0.349                                                        | 0.590                          | 1001.64            | 591.10             | 0.206                          | 778.44             | 160.54             |
| A_68_P25953920 | chr8:73293490-73293534                            | NM_008841:7099         | Pik3r2        | INSIDE                 | 0.349                                                        | 0.679                          | 1182.80            | 803.20             | 0.237                          | 970.57             | 230.28             |
| A_68_P27160897 | chr10:57252403-57252448                           | NM_019760:-90          | Serine1       | PROMOTER               | 0.349                                                        | 0.466                          | 1189.08            | 554.31             | 0.163                          | 942.99             | 153.44             |

| ProbeName      | Target position of probe on CpG island microarray | TargetID                 | GeneSymbol    | CpG island Description | Ratio of relative methylation (TiO <sub>2</sub> -NP/Vehicle) | Sham group                     |                    |                    | TiO <sub>2</sub> -H group      |                    |                    |
|----------------|---------------------------------------------------|--------------------------|---------------|------------------------|--------------------------------------------------------------|--------------------------------|--------------------|--------------------|--------------------------------|--------------------|--------------------|
|                |                                                   |                          |               |                        |                                                              | Relative methylation (Cy5/Cy3) | Cy3 signal (Input) | Cy5 signal (MeDIP) | Relative methylation (Cy5/Cy3) | Cy3 signal (Input) | Cy5 signal (MeDIP) |
| A_68_P21478263 | chr2:102499439-102499483                          | NM_001077514:621         | Slc1a2        | INSIDE                 | 0.349                                                        | 0.426                          | 1244.38            | 530.24             | 0.149                          | 1051.03            | 156.14             |
| A_68_P29421302 | chr14:15535329-15535377                           | NM_001033270:-186        | Slc4a7        | PROMOTER               | 0.349                                                        | 0.445                          | 1301.27            | 579.43             | 0.156                          | 976.97             | 151.93             |
| A_68_P20662734 | chr1:141319149-141319193                          | NM_172643:211            | Zbtb41        | INSIDE                 | 0.349                                                        | 0.476                          | 1372.99            | 652.86             | 0.166                          | 1054.20            | 175.15             |
| A_68_P31722245 | chr18:55147700-55147744                           | NM_175751:2112           | Zfp608        | INSIDE                 | 0.349                                                        | 0.653                          | 1413.12            | 922.57             | 0.228                          | 1056.52            | 240.77             |
| A_68_P28956447 | chr13:37869883-37869931                           | ENSMUST00000122842:-362  |               | PROMOTER               | 0.349                                                        | 0.701                          | 1554.95            | 1090.71            | 0.245                          | 1060.64            | 260.00             |
| A_68_P20914305 | chr1:189432968-189433012                          | ENSMUST00000152927:-584  |               | PROMOTER               | 0.349                                                        | 0.609                          | 991.74             | 604.21             | 0.212                          | 800.97             | 170.14             |
| A_68_P27212539 | chr10:67011459-67011503                           | NM_001005419:223         | Ado           | INSIDE                 | 0.348                                                        | 0.474                          | 1953.05            | 926.63             | 0.165                          | 1854.02            | 305.70             |
| A_68_P26595214 | chr9:66643808-66643852                            | NM_177583:-600           | Aph1b         | PROMOTER               | 0.348                                                        | 0.523                          | 1276.14            | 666.86             | 0.182                          | 948.74             | 172.32             |
| A_68_P30365368 | chr15:79091566-79091610                           | NM_177580:24351          | Baiap212      | INSIDE                 | 0.348                                                        | 0.686                          | 2382.77            | 1635.65            | 0.239                          | 2087.92            | 498.34             |
| A_68_P27418182 | chr10:105278621-105278665                         | NM_025602:108            | Ccdc59        | INSIDE                 | 0.348                                                        | 0.601                          | 1307.64            | 785.41             | 0.209                          | 1008.25            | 210.65             |
| A_68_P23254629 | chr4:120712162-120712206                          | NM_007741:14             | Col9a2        | INSIDE                 | 0.348                                                        | 0.656                          | 1641.29            | 1076.36            | 0.228                          | 1340.93            | 305.89             |
| A_68_P23236051 | chr4:117354667-117354711                          | NM_023178:142            | Dmap1         | INSIDE                 | 0.348                                                        | 0.512                          | 2108.78            | 1079.77            | 0.178                          | 1662.61            | 296.03             |
| A_68_P31775663 | chr18:64648900-64648944                           | NM_007998:-202           | Fech          | PROMOTER               | 0.348                                                        | 0.574                          | 2138.47            | 1228.40            | 0.200                          | 1545.21            | 308.52             |
| A_68_P23892220 | chr5:92512615-92512659                            | NM_001080794:-53         | G3bp2         | PROMOTER               | 0.348                                                        | 0.718                          | 2229.52            | 1600.68            | 0.250                          | 1610.20            | 402.39             |
| A_68_P26345149 | chr9:20836417-20836466                            | NM_008319:-40            | Icam5         | PROMOTER               | 0.348                                                        | 0.531                          | 1368.90            | 726.47             | 0.184                          | 1163.21            | 214.58             |
| A_68_P29233347 | chr13:94944386-94944430                           | NM_172589:116658         | Lhfp12        | INSIDE                 | 0.348                                                        | 0.730                          | 2550.73            | 1860.93            | 0.254                          | 1889.91            | 477.32             |
| A_68_P24044318 | chr5:121847841-121847885                          | NM_172722:-128           | Naa25         | PROMOTER               | 0.348                                                        | 0.665                          | 1669.70            | 1109.92            | 0.232                          | 1353.75            | 313.59             |
| A_68_P20140986 | chr1:34906861-34906905                            | NM_145516:79             | Plekhh2       | INSIDE                 | 0.348                                                        | 0.565                          | 3188.57            | 1800.24            | 0.196                          | 2510.90            | 493.37             |
| A_68_P26365988 | chr9:25059616-25059661                            | NM_001205367:-401        | Septin7       | PROMOTER               | 0.348                                                        | 0.689                          | 1101.77            | 759.06             | 0.240                          | 955.50             | 229.17             |
| A_68_P25950463 | chr8:72735887-72735931                            | NM_001007570:272         | Slc25a42      | INSIDE                 | 0.348                                                        | 0.612                          | 1770.31            | 1082.71            | 0.213                          | 1267.46            | 269.44             |
| A_68_P26750480 | chr9:96918879-96918923                            | NM_145134:-126           | Spsb4         | PROMOTER               | 0.348                                                        | 0.445                          | 1561.18            | 694.96             | 0.155                          | 1344.12            | 208.26             |
| A_68_P21587980 | chr2:122590894-122590938                          | NM_001162503:-178        | Sqrdl         | PROMOTER               | 0.348                                                        | 0.511                          | 2170.79            | 1109.61            | 0.178                          | 1708.45            | 303.97             |
| A_68_P25158144 | chr7:66483973-66484017                            | NM_173010:-125           | Ubc3a         | PROMOTER               | 0.348                                                        | 0.462                          | 1876.60            | 866.42             | 0.161                          | 1602.23            | 257.60             |
| A_68_P26032506 | chr8:89561850-89561894                            | ENSMUST00000085049:-9746 |               | PROMOTER               | 0.348                                                        | 0.594                          | 1514.44            | 899.95             | 0.207                          | 1154.36            | 238.56             |
| A_68_P21812326 | chr2:163244652-163244697                          | NM_025699:532            | 3230401D17Rik | INSIDE                 | 0.347                                                        | 0.550                          | 1403.57            | 771.87             | 0.191                          | 1069.58            | 204.11             |
| A_68_P25286566 | chr7:91235318-91235362                            | NM_030728:-325           | 9930013L23Rik | PROMOTER               | 0.347                                                        | 0.623                          | 1614.11            | 1006.39            | 0.216                          | 1140.03            | 246.58             |
| A_68_P24104848 | chr5:133018792-133018836                          | NM_177047:-601           | Aut2          | PROMOTER               | 0.347                                                        | 0.585                          | 1578.68            | 923.29             | 0.203                          | 1180.31            | 239.25             |
| A_68_P24055190 | chr5:123795453-123795497                          | NM_029850:1018           | Bel7a         | INSIDE                 | 0.347                                                        | 0.730                          | 2433.72            | 1775.81            | 0.253                          | 1715.66            | 434.55             |
| A_68_P21673353 | chr2:138082625-138082669                          | NM_001025431:327         | Btbd3         | INSIDE                 | 0.347                                                        | 0.439                          | 2287.72            | 1004.93            | 0.152                          | 1958.63            | 298.59             |
| A_68_P23410164 | chr4:150482143-150482187                          | NM_001081557:753713      | Camta1        | INSIDE                 | 0.347                                                        | 0.648                          | 3995.98            | 2590.53            | 0.225                          | 2728.26            | 614.28             |
| A_68_P22476389 | chr3:121130415-121130465                          | NM_028044:982            | Cnn3          | INSIDE                 | 0.347                                                        | 0.478                          | 2206.32            | 1053.53            | 0.166                          | 1572.16            | 260.25             |
| A_68_P30576344 | chr16:17891528-17891572                           | NM_001109750:271         | Dger2         | INSIDE                 | 0.347                                                        | 0.526                          | 2446.86            | 1286.03            | 0.182                          | 1913.85            | 349.27             |
| A_68_P21767850 | chr2:155652193-155652237                          | NM_010579:447            | Eif6          | INSIDE                 | 0.347                                                        | 0.554                          | 4497.99            | 2492.59            | 0.192                          | 3414.99            | 656.39             |
| A_68_P28072082 | chr11:100981134-100981178                         | NM_026501:-18            | Fam134c       | PROMOTER               | 0.347                                                        | 0.560                          | 1409.76            | 789.69             | 0.194                          | 1110.88            | 215.98             |
| A_68_P31121749 | chr17:28450313-28450357                           | NM_001163819:-140        | Fance         | PROMOTER               | 0.347                                                        | 0.718                          | 1420.58            | 1019.99            | 0.249                          | 985.33             | 245.38             |
| A_68_P32815027 | chrX:164560836-164560880                          | NM_001033330:454307      | Frmpd4        | INSIDE                 | 0.347                                                        | 1.463                          | 933.95             | 1366.66            | 0.508                          | 557.14             | 283.14             |
| A_68_P22522345 | chr3:129533741-129533785                          | NM_026578:552            | Gar1          | INSIDE                 | 0.347                                                        | 0.613                          | 2300.94            | 1410.15            | 0.212                          | 1679.40            | 356.72             |
| A_68_P31936768 | chr19:7008741-7008785                             | NM_008431:243            | Kenk4         | INSIDE                 | 0.347                                                        | 0.494                          | 1948.28            | 962.37             | 0.172                          | 1503.30            | 257.84             |
| A_68_P30682961 | chr16:37869139-37869183                           | NM_177093:675            | Lrrc58        | INSIDE                 | 0.347                                                        | 0.540                          | 2018.30            | 1088.96            | 0.187                          | 1581.02            | 295.65             |
| A_68_P30498333 | chr15:102347359-102347404                         | NM_001163643:54          | Map3k12       | INSIDE                 | 0.347                                                        | 0.557                          | 1772.33            | 987.48             | 0.193                          | 1335.19            | 258.25             |
| A_68_P30499092 | chr15:102502227-102502271                         | NR_030460:49             | Mir688        | INSIDE                 | 0.347                                                        | 0.636                          | 921.97             | 586.04             | 0.220                          | 662.62             | 145.96             |
| A_68_P29615709 | chr14:55633702-55633746                           | NM_026890:-566           | Ngdn          | PROMOTER               | 0.347                                                        | 0.683                          | 1576.78            | 1076.28            | 0.237                          | 1163.61            | 275.85             |
| A_68_P29428096 | chr14:17075774-17075818                           | NM_021504:-6031          | Ngly1         | PROMOTER               | 0.347                                                        | 0.351                          | 1599.30            | 561.67             | 0.122                          | 1270.14            | 154.81             |
| A_68_P24152138 | chr5:143005802-143005846                          | NM_019943:206            | Papob         | INSIDE                 | 0.347                                                        | 1.795                          | 1155.09            | 2073.25            | 0.622                          | 916.43             | 569.98             |
| A_68_P24591296 | chr6:83028488-83028532                            | NM_197992:127            | Pegfl1        | INSIDE                 | 0.347                                                        | 0.334                          | 2005.96            | 669.57             | 0.116                          | 1555.03            | 180.15             |
| A_68_P27901224 | chr11:70353932-70353976                           | NM_008876:289            | Pld2          | INSIDE                 | 0.347                                                        | 0.608                          | 2218.30            | 1348.45            | 0.211                          | 1849.13            | 390.19             |
| A_68_P21640034 | chr2:132210975-132211019                          | NM_144944:187            | Prokr2        | INSIDE                 | 0.347                                                        | 0.605                          | 1847.94            | 1118.73            | 0.210                          | 1484.92            | 311.82             |
| A_68_P23997297 | chr5:113716248-113716292                          | NR_027934:-6649          | Sgsm1         | PROMOTER               | 0.347                                                        | 0.691                          | 2844.68            | 1966.65            | 0.240                          | 2188.28            | 525.11             |
| A_68_P30405820 | chr15:86044641-86044685                           | NM_145476:-226           | Tbc1d22a      | PROMOTER               | 0.347                                                        | 0.565                          | 2300.99            | 1300.40            | 0.196                          | 1734.31            | 339.90             |
| A_68_P31620976 | chr18:36093025-36093069                           |                          |               | Unknown                | 0.347                                                        | 0.557                          | 5390.67            | 3000.63            | 0.193                          | 4045.35            | 782.14             |
| A_68_P25618381 | chr8:4677445-4677489                              | ENSMUST00000058918:899   |               | DOWNSTREAM             | 0.347                                                        | 0.367                          | 2027.50            | 744.77             | 0.127                          | 1474.36            | 187.89             |

| ProbeName      | Target position of probe on CpG island microarray | TargetID              | GeneSymbol    | CpG island Description | Ratio of relative methylation (TiO <sub>2</sub> -NP/Vehicle) | Sham group                     |                    |                    | TiO <sub>2</sub> -H group      |                    |                    |
|----------------|---------------------------------------------------|-----------------------|---------------|------------------------|--------------------------------------------------------------|--------------------------------|--------------------|--------------------|--------------------------------|--------------------|--------------------|
|                |                                                   |                       |               |                        |                                                              | Relative methylation (Cy5/Cy3) | Cy3 signal (Input) | Cy5 signal (MeDIP) | Relative methylation (Cy5/Cy3) | Cy3 signal (Input) | Cy5 signal (MeDIP) |
| A_68_P30711914 | chr16:42875836-42875881                           | ENSMUST00000147181:-5 |               | PROMOTER               | 0.347                                                        | 0.456                          | 1893.17            | 863.12             | 0.158                          | 1430.09            | 226.24             |
| A_68_P22862527 | chr4:41454006-41454050                            | NM_028624:769         | 1110017D15Rik | INSIDE                 | 0.346                                                        | 0.574                          | 1866.88            | 1070.67            | 0.199                          | 1492.32            | 296.37             |
| A_68_P25457394 | chr7:125387430-125387474                          | NR_027879:32          | 4930583K01Rik | INSIDE                 | 0.346                                                        | 0.664                          | 1675.75            | 1113.01            | 0.230                          | 1298.59            | 298.55             |
| A_68_P30380158 | chr15:81702740-81702784                           | NM_080633:-130        | Aco2          | DIVERGENT_PROMOTER     | 0.346                                                        | 0.562                          | 1716.09            | 963.94             | 0.195                          | 1293.49            | 251.63             |
| A_68_P20837649 | chr1:175297409-175297453                          | NM_053199:396         | Cadm3         | INSIDE                 | 0.346                                                        | 0.488                          | 2611.70            | 1273.63            | 0.169                          | 1819.80            | 306.71             |
| A_68_P21601161 | chr2:125073250-125073294                          | NM_023595:22          | Dut           | INSIDE                 | 0.346                                                        | 0.695                          | 2144.94            | 1490.24            | 0.240                          | 1617.56            | 388.64             |
| A_68_P27289145 | chr10:80826688-80826732                           | NM_028657:6396        | F630110N24Rik | INSIDE                 | 0.346                                                        | 0.566                          | 913.40             | 517.16             | 0.196                          | 674.88             | 132.15             |
| A_68_P31948451 | chr19:10176193-10176237                           | NM_019699:-221        | Fads2         | PROMOTER               | 0.346                                                        | 0.488                          | 1341.38            | 654.93             | 0.169                          | 1059.29            | 178.79             |
| A_68_P23590168 | chr5:33972239-33972283                            | NM_178390:24          | Fam53a        | INSIDE                 | 0.346                                                        | 0.261                          | 2591.49            | 675.40             | 0.090                          | 1961.12            | 176.96             |
| A_68_P30347361 | chr15:76124944-76124988                           | NM_001195537:103      | Gm10345       | INSIDE                 | 0.346                                                        | 0.670                          | 2218.48            | 1486.76            | 0.232                          | 1701.76            | 394.89             |
| A_68_P31953771 | chr19:11015569-11015613                           | NM_009962:3941        | Gpr44         | INSIDE                 | 0.346                                                        | 0.585                          | 1188.64            | 695.44             | 0.203                          | 938.38             | 190.04             |
| A_68_P28033987 | chr11:94490892-94490936                           | NM_133807:-223        | Lrrc59        | PROMOTER               | 0.346                                                        | 0.467                          | 1648.54            | 769.91             | 0.162                          | 1465.96            | 236.99             |
| A_68_P24994044 | chr7:20147793-20147837                            | NM_199149:-67         | Lrrc68        | PROMOTER               | 0.346                                                        | 0.375                          | 1459.04            | 547.60             | 0.130                          | 1273.98            | 165.40             |
| A_68_P24362050 | chr6:35489064-35489123                            | NM_008098:795         | Mtpn          | INSIDE                 | 0.346                                                        | 0.658                          | 817.74             | 538.03             | 0.228                          | 744.07             | 169.54             |
| A_68_P29110674 | chr13:68720849-68720893                           | NM_172480:128         | Mtrr          | INSIDE                 | 0.346                                                        | 0.543                          | 6993.05            | 3796.75            | 0.188                          | 5272.54            | 989.59             |
| A_68_P29336879 | chr13:11359191-113591235                          | NM_008903:82          | Ppap2a        | INSIDE                 | 0.346                                                        | 0.400                          | 2048.00            | 818.63             | 0.138                          | 1487.73            | 205.49             |
| A_68_P31108134 | chr17:26206603-26206648                           | NM_001162868:-503     | Rab11fip3     | PROMOTER               | 0.346                                                        | 0.643                          | 1198.34            | 770.82             | 0.223                          | 907.53             | 202.24             |
| A_68_P20269871 | chr1:60624074-60624118                            | NM_001045513:-487     | Raph1         | PROMOTER               | 0.346                                                        | 0.454                          | 1323.52            | 601.18             | 0.157                          | 1077.61            | 169.44             |
| A_68_P30348858 | chr15:76348557-76348601                           | NM_130893:3981        | Sert1         | INSIDE                 | 0.346                                                        | 0.480                          | 1591.67            | 763.81             | 0.166                          | 1138.79            | 189.10             |
| A_68_P30465070 | chr15:96529072-96529122                           | NM_175121:1033        | Slc38a2       | INSIDE                 | 0.346                                                        | 0.434                          | 1176.92            | 510.40             | 0.150                          | 921.32             | 138.35             |
| A_68_P28871638 | chr13:21292545-21292595                           | NM_009054:20743       | Trim27        | DOWNSTREAM             | 0.346                                                        | 0.415                          | 1486.03            | 616.88             | 0.144                          | 1132.32            | 162.54             |
| A_68_P28160204 | chr11:116442979-116443023                         | NM_173755:-239        | Ube2o         | PROMOTER               | 0.346                                                        | 0.696                          | 1128.49            | 785.63             | 0.241                          | 927.90             | 223.53             |
| A_68_P28730612 | chr12:110132421-110132465                         | NM_177602:-39         | Wdr25         | DIVERGENT_PROMOTER     | 0.346                                                        | 0.584                          | 2508.95            | 1464.63            | 0.202                          | 1879.81            | 379.22             |
| A_68_P26891988 | chr9:122812318-122812362                          | NM_001177505:14752    | Zfp167        | DOWNSTREAM             | 0.346                                                        | 0.693                          | 1775.77            | 1230.14            | 0.240                          | 1231.48            | 295.22             |
| A_68_P30501817 | chr15:102890042-102890087                         | AK019974:-327         |               | PROMOTER               | 0.346                                                        | 0.576                          | 963.56             | 555.05             | 0.199                          | 698.64             | 139.06             |
| A_68_P30557262 | chr16:13437166-13437210                           | AK042946:-490         |               | PROMOTER               | 0.346                                                        | 0.563                          | 1907.97            | 1074.44            | 0.195                          | 1434.16            | 279.83             |
| A_68_P23296887 | chr4:129168766-129168810                          | NM_001085491:355      | 1700125D06Rik | INSIDE                 | 0.345                                                        | 0.541                          | 2189.77            | 1184.01            | 0.187                          | 1498.37            | 279.57             |
| A_68_P22346556 | chr3:95755077-95755121                            | NM_023210:21919       | Anp32c        | DOWNSTREAM             | 0.345                                                        | 0.701                          | 3316.82            | 2325.71            | 0.242                          | 2505.96            | 606.98             |
| A_68_P25616527 | chr8:4206553-4206597                              | NM_207203:10738       | BC068157      | DOWNSTREAM             | 0.345                                                        | 0.649                          | 1674.15            | 1086.44            | 0.224                          | 1142.10            | 256.05             |
| A_68_P26600871 | chr9:67607518-67607562                            | NM_001081314:297      | C2cd4b        | INSIDE                 | 0.345                                                        | 0.513                          | 2348.85            | 1204.41            | 0.177                          | 1940.66            | 343.40             |
| A_68_P21477083 | chr2:102290541-102290585                          | NM_010218:1387        | Fjx1          | INSIDE                 | 0.345                                                        | 0.690                          | 1870.10            | 1290.36            | 0.238                          | 1501.93            | 357.29             |
| A_68_P24519505 | chr6:66986497-66986541                            | NM_007836:883         | Gadd45a       | INSIDE                 | 0.345                                                        | 0.431                          | 2343.74            | 1010.48            | 0.149                          | 1850.66            | 274.91             |
| A_68_P32048646 | chr19:28752584-28752628                           | NM_175459:1961        | Glii3         | INSIDE                 | 0.345                                                        | 0.616                          | 1558.16            | 960.44             | 0.212                          | 1266.66            | 269.05             |
| A_68_P22785948 | chr4:24423938-24423984                            | NM_199467:352         | Mms22l        | INSIDE                 | 0.345                                                        | 0.554                          | 922.74             | 511.39             | 0.191                          | 630.84             | 120.57             |
| A_68_P32142240 | chr19:46211708-46211752                           | NM_008852:11085       | Pitx3         | INSIDE                 | 0.345                                                        | 0.537                          | 1189.29            | 638.22             | 0.185                          | 973.75             | 180.21             |
| A_68_P27430005 | chr10:107599244-107599288                         | NM_027892:-189        | Ppp1r12a      | PROMOTER               | 0.345                                                        | 0.445                          | 1358.46            | 604.42             | 0.153                          | 1248.57            | 191.50             |
| A_68_P29094234 | chr13:63674256-63674300                           | NM_008957:-7450       | Ptch1         | PROMOTER               | 0.345                                                        | 0.536                          | 2331.34            | 1249.73            | 0.185                          | 1792.86            | 331.49             |
| A_68_P31682231 | chr18:47526609-47526653                           | NM_018744:1892        | Sema6a        | INSIDE                 | 0.345                                                        | 0.668                          | 2256.66            | 1506.77            | 0.230                          | 1764.30            | 406.24             |
| A_68_P22338873 | chr3:94216925-94216977                            | NM_028307:-289        | Tdrkh         | PROMOTER               | 0.345                                                        | 0.614                          | 1227.17            | 753.72             | 0.212                          | 819.41             | 173.68             |
| A_68_P24162461 | chr5:145528855-145528900                          | NM_001081362:-783     | Trrap         | DIVERGENT_PROMOTER     | 0.345                                                        | 0.692                          | 1276.24            | 883.62             | 0.239                          | 930.82             | 222.09             |
| A_68_P30125734 | chr15:33617702-33617758                           | NM_001085421:-92      | Tspyl5        | PROMOTER               | 0.345                                                        | 0.439                          | 1748.06            | 767.52             | 0.151                          | 1378.11            | 208.73             |
| A_68_P29440562 | chr14:19726350-19726394                           | NM_144839:-231        | Ube2e2        | PROMOTER               | 0.345                                                        | 0.574                          | 1097.38            | 629.74             | 0.198                          | 820.14             | 162.60             |
| A_68_P26467230 | chr9:44169640-44169684                            | NM_027889:91          | Vps11         | INSIDE                 | 0.345                                                        | 0.616                          | 3114.82            | 1920.10            | 0.213                          | 2334.67            | 497.19             |
| A_68_P30568843 | chr16:16302936-16302980                           | NM_198246:-99         | Yars2         | PROMOTER               | 0.345                                                        | 0.536                          | 1519.30            | 813.81             | 0.185                          | 1283.94            | 237.00             |
| A_68_P31782009 | chr18:65741080-65741124                           | NM_207255:1219        | Zfp532        | INSIDE                 | 0.345                                                        | 0.494                          | 1236.74            | 611.02             | 0.170                          | 956.13             | 162.83             |
| A_68_P31491180 | chr18:10707044-10707088                           | NM_134130:-372        | Abhd3         | PROMOTER               | 0.344                                                        | 0.673                          | 2149.10            | 1445.60            | 0.232                          | 1657.30            | 383.91             |
| A_68_P24469549 | chr6:55401776-55401820                            | NM_001025372:-175     | Adecyap1r1    | PROMOTER               | 0.344                                                        | 0.587                          | 2809.37            | 1648.59            | 0.202                          | 2108.33            | 425.67             |
| A_68_P29486554 | chr14:28149566-28149610                           | NM_027871:98364       | Arhgef3       | INSIDE                 | 0.344                                                        | 0.625                          | 1140.57            | 712.63             | 0.215                          | 936.30             | 201.24             |
| A_68_P24059367 | chr5:124566387-124566431                          | NM_144509:292         | Arl6ip4       | INSIDE                 | 0.344                                                        | 0.407                          | 1975.84            | 804.76             | 0.140                          | 1547.73            | 217.04             |
| A_68_P24540589 | chr6:72184688-72184732                            | NM_153778:861         | Atoh8         | INSIDE                 | 0.344                                                        | 0.409                          | 3018.72            | 1233.51            | 0.140                          | 2370.38            | 333.00             |
| A_68_P31932217 | chr19:6015773-6015817                             | NM_007600:-547        | Capn1         | PROMOTER               | 0.344                                                        | 0.592                          | 2441.53            | 1444.31            | 0.203                          | 1880.58            | 382.65             |

| ProbeName      | Target position of probe on CpG island microarray | TargetID               | GeneSymbol    | CpG island Description | Ratio of relative methylation (TiO <sub>2</sub> -NP/Vehicle) | Sham group                     |                    |                    | TiO <sub>2</sub> -H group      |                    |                    |
|----------------|---------------------------------------------------|------------------------|---------------|------------------------|--------------------------------------------------------------|--------------------------------|--------------------|--------------------|--------------------------------|--------------------|--------------------|
|                |                                                   |                        |               |                        |                                                              | Relative methylation (Cy5/Cy3) | Cy3 signal (Input) | Cy5 signal (MeDIP) | Relative methylation (Cy5/Cy3) | Cy3 signal (Input) | Cy5 signal (MeDIP) |
| A_68_P27563901 | chr11:5442216-5442260                             | NM_134033:-18          | Ccdc117       | PROMOTER               | 0.344                                                        | 0.718                          | 1718.50            | 1233.47            | 0.247                          | 1349.64            | 333.42             |
| A_68_P28059228 | chr11:98769471-98769515                           | NM_011799:28           | Cdc6          | INSIDE                 | 0.344                                                        | 1.407                          | 1819.73            | 2560.78            | 0.484                          | 1234.76            | 597.56             |
| A_68_P31254442 | chr17:56323432-56323476                           | NM_080837:-111         | D17Wsu104e    | PROMOTER               | 0.344                                                        | 0.454                          | 2548.60            | 1158.08            | 0.156                          | 2023.79            | 315.92             |
| A_68_P22998989 | chr4:68615175-68615219                            | NM_019967:235          | Dbc1          | INSIDE                 | 0.344                                                        | 0.506                          | 1069.98            | 541.88             | 0.174                          | 790.43             | 137.54             |
| A_68_P28914786 | chr13:30077338-30077382                           | NM_010093:572          | E2f3          | INSIDE                 | 0.344                                                        | 0.459                          | 3660.62            | 1681.12            | 0.158                          | 2711.94            | 428.15             |
| A_68_P29241614 | chr13:96388371-96388415                           | NM_010169:-4           | F2r           | PROMOTER               | 0.344                                                        | 0.540                          | 2019.99            | 1091.38            | 0.186                          | 1478.25            | 275.00             |
| A_68_P24290978 | chr6:22305712-22305756                            | NM_138587:347          | Fam3c         | INSIDE                 | 0.344                                                        | 0.380                          | 2552.66            | 970.80             | 0.131                          | 2087.58            | 273.19             |
| A_68_P21339294 | chr2:74585119-74585163                            | NM_010468:35091        | Hoxd3         | INSIDE                 | 0.344                                                        | 0.683                          | 1523.36            | 1039.69            | 0.235                          | 1194.89            | 280.82             |
| A_68_P23193385 | chr4:107552379-107552423                          | NM_010760:-17          | Magoh         | PROMOTER               | 0.344                                                        | 0.587                          | 1208.40            | 708.95             | 0.202                          | 918.58             | 185.23             |
| A_68_P21548581 | chr2:115686326-115686370                          | NM_001159569:204009    | Meis2         | DOWNSTREAM             | 0.344                                                        | 0.430                          | 1557.31            | 669.02             | 0.148                          | 1174.48            | 173.63             |
| A_68_P28039696 | chr11:95448025-95448069                           | NM_033217:966          | Ngfr          | INSIDE                 | 0.344                                                        | 0.554                          | 1706.15            | 945.41             | 0.191                          | 1239.07            | 236.27             |
| A_68_P22350765 | chr3:96512213-96512257                            | NM_001162925:249       | Nudt17        | INSIDE                 | 0.344                                                        | 0.488                          | 1912.80            | 934.13             | 0.168                          | 1486.44            | 249.62             |
| A_68_P26463577 | chr9:43553595-43553639                            | NM_021424:958          | Pvrl1         | INSIDE                 | 0.344                                                        | 0.566                          | 943.26             | 534.19             | 0.195                          | 727.92             | 141.86             |
| A_68_P27704162 | chr11:34934585-34934629                           | NM_011412:-351         | Slit3         | PROMOTER               | 0.344                                                        | 0.467                          | 1586.99            | 740.41             | 0.161                          | 1269.13            | 203.90             |
| A_68_P25425956 | chr7:119822840-119822884                          | NM_001166584:29        | Tead1         | INSIDE                 | 0.344                                                        | 0.469                          | 1119.16            | 524.58             | 0.161                          | 856.78             | 138.13             |
| A_68_P21736750 | chr2:149656913-149656958                          | NM_00108521:417        | Tmem90b       | INSIDE                 | 0.344                                                        | 0.547                          | 1978.60            | 1081.48            | 0.188                          | 1688.29            | 317.19             |
| A_68_P26447519 | chr9:40964965-40965009                            | NM_176860:591          | Ubash3b       | INSIDE                 | 0.344                                                        | 0.430                          | 1488.87            | 640.59             | 0.148                          | 1269.45            | 188.16             |
| A_68_P28881068 | chr13:23461198-23461242                           | NM_001111107:-149      | Zfp322a       | PROMOTER               | 0.344                                                        | 0.589                          | 1652.29            | 972.74             | 0.202                          | 1327.03            | 268.56             |
| A_68_P25005239 | chr7:25292778-25292822                            | NM_146183:695          | Zfp428        | INSIDE                 | 0.344                                                        | 0.540                          | 2038.45            | 1099.97            | 0.185                          | 1600.26            | 296.62             |
| A_68_P26015764 | chr8:86146384-86146428                            | AK160924:14211         |               | INSIDE                 | 0.344                                                        | 0.699                          | 2315.65            | 1618.31            | 0.240                          | 1772.38            | 426.18             |
| A_68_P21393923 | chr2:84510529-84510573                            | NM_001033166:315       | 2700094K13Rik | INSIDE                 | 0.343                                                        | 0.538                          | 1529.39            | 822.20             | 0.184                          | 1088.64            | 200.69             |
| A_68_P27255924 | chr10:74779536-74779580                           | NM_009630:-129         | Adora2a       | PROMOTER               | 0.343                                                        | 0.525                          | 1504.76            | 790.52             | 0.180                          | 1360.65            | 245.11             |
| A_68_P25500900 | chr7:133645875-133645919                          | NM_183020:920          | Atxn2l        | INSIDE                 | 0.343                                                        | 1.484                          | 4817.28            | 7147.49            | 0.509                          | 3484.37            | 1773.35            |
| A_68_P32128433 | chr19:43827788-43827832                           | NM_001113562:298       | Cutc          | INSIDE                 | 0.343                                                        | 0.633                          | 2293.03            | 1451.94            | 0.217                          | 1730.26            | 375.31             |
| A_68_P24125310 | chr5:137791448-137791492                          | NM_001159571:134       | Ephb4         | INSIDE                 | 0.343                                                        | 0.541                          | 3935.14            | 2126.96            | 0.186                          | 3267.51            | 606.59             |
| A_68_P29644190 | chr14:60997369-60997413                           | NM_001164705:268       | Fam123a       | INSIDE                 | 0.343                                                        | 0.602                          | 1906.14            | 1146.59            | 0.206                          | 1505.08            | 310.69             |
| A_68_P30588159 | chr16:20548466-20548510                           | NR_030670:141          | Gm15760       | INSIDE                 | 0.343                                                        | 0.695                          | 1557.95            | 1083.45            | 0.238                          | 1066.30            | 254.19             |
| A_68_P28357924 | chr12:37108183-37108227                           | NM_178629:99           | Ispd          | INSIDE                 | 0.343                                                        | 0.387                          | 2597.33            | 1005.23            | 0.133                          | 2013.78            | 267.18             |
| A_68_P31156873 | chr17:35118675-35118726                           | NM_001204274:-98       | Lsm2          | PROMOTER               | 0.343                                                        | 0.633                          | 1144.79            | 724.59             | 0.217                          | 836.98             | 181.68             |
| A_68_P26581615 | chr9:64234276-64234320                            | NM_172522:866          | Megf11        | INSIDE                 | 0.343                                                        | 0.588                          | 1478.56            | 868.87             | 0.202                          | 1282.68            | 258.60             |
| A_68_P25285353 | chr7:91040923-91040967                            | NM_023403:435          | Mesdc2        | INSIDE                 | 0.343                                                        | 0.742                          | 3615.43            | 2682.89            | 0.254                          | 2438.90            | 620.28             |
| A_68_P30559565 | chr16:13903341-13903391                           | NM_001039533:-138      | Pdxdc1        | PROMOTER               | 0.343                                                        | 0.446                          | 1252.10            | 558.00             | 0.153                          | 897.76             | 137.13             |
| A_68_P23292761 | chr4:128405549-128405608                          | NM_001195083:764       | Phc2          | INSIDE                 | 0.343                                                        | 0.648                          | 904.44             | 586.46             | 0.222                          | 564.26             | 125.50             |
| A_68_P32322124 | chrX:34731543-34731587                            | NM_153503:227          | Rnf113a1      | INSIDE                 | 0.343                                                        | 1.725                          | 2033.00            | 3506.19            | 0.592                          | 837.31             | 495.53             |
| A_68_P30572152 | chr16:17132713-17132758                           | NM_022324:-259         | Sdf2l1        | PROMOTER               | 0.343                                                        | 0.652                          | 972.55             | 634.34             | 0.223                          | 716.56             | 160.11             |
| A_68_P25265199 | chr7:87331654-87331698                            | NM_013659:-50          | Sema4b        | PROMOTER               | 0.343                                                        | 0.535                          | 1137.27            | 608.78             | 0.184                          | 971.67             | 178.54             |
| A_68_P31351018 | chr17:74737917-74737961                           | NM_001162870:-388      | Spast         | PROMOTER               | 0.343                                                        | 0.531                          | 1832.83            | 973.25             | 0.182                          | 1583.59            | 288.44             |
| A_68_P30251031 | chr15:58765278-58765322                           | NM_175151:-15          | Tatdn1        | DIVERGENT_PROMOTER     | 0.343                                                        | 0.550                          | 962.61             | 529.46             | 0.189                          | 846.52             | 159.61             |
| A_68_P26564383 | chr9:61220517-61220561                            | NM_001083927:366       | Tle3          | INSIDE                 | 0.343                                                        | 0.567                          | 1269.16            | 720.00             | 0.195                          | 923.94             | 179.79             |
| A_68_P26815583 | chr9:108480765-108480809                          | NM_031392:215          | Wdr6          | INSIDE                 | 0.343                                                        | 0.751                          | 4941.07            | 3708.80            | 0.258                          | 3387.87            | 873.24             |
| A_68_P26228075 | chr8:124175832-124175876                          | NM_080855:-21          | Zcche14       | PROMOTER               | 0.343                                                        | 0.463                          | 2103.87            | 975.09             | 0.159                          | 1537.21            | 244.55             |
| A_68_P21749217 | chr2:152239906-152239950                          | NM_175126:852          | Zcche3        | INSIDE                 | 0.343                                                        | 0.609                          | 1741.48            | 1060.96            | 0.209                          | 1346.73            | 281.21             |
| A_68_P27241481 | chr10:72117558-72117607                           | NM_025635:-60          | Zwint         | PROMOTER               | 0.343                                                        | 0.635                          | 823.34             | 522.85             | 0.218                          | 684.27             | 149.03             |
| A_68_P28708612 | chr12:106575527-106575571                         | ENSMUST00000138649:346 |               | INSIDE                 | 0.343                                                        | 0.679                          | 1199.68            | 814.38             | 0.233                          | 942.32             | 219.70             |
| A_68_P23281853 | chr4:126430986-126431030                          | NM_133886:-5           | AU040320      | PROMOTER               | 0.342                                                        | 0.470                          | 1829.05            | 859.01             | 0.161                          | 1333.78            | 214.08             |
| A_68_P24218863 | chr6:6829517-6829561                              | NM_010056:2530         | Dlx5          | INSIDE                 | 0.342                                                        | 0.489                          | 2406.66            | 1176.53            | 0.167                          | 1698.33            | 284.26             |
| A_68_P26527191 | chr9:54546796-54546840                            | NM_021422:-547         | Dnajia4       | PROMOTER               | 0.342                                                        | 1.445                          | 3453.02            | 4990.09            | 0.494                          | 2623.13            | 1294.83            |
| A_68_P25470622 | chr7:127986473-127986517                          | NM_007908:98           | Eef2k         | INSIDE                 | 0.342                                                        | 0.620                          | 2300.15            | 1425.40            | 0.212                          | 1815.39            | 385.30             |
| A_68_P25637619 | chr8:8660957-8661001                              | NM_010111:-205         | Efnb2         | PROMOTER               | 0.342                                                        | 0.556                          | 1755.35            | 976.85             | 0.190                          | 1389.17            | 264.38             |
| A_68_P25609683 | chr7:152047109-152047153                          | NM_010202:-160         | Fgf4          | PROMOTER               | 0.342                                                        | 0.530                          | 2799.23            | 1484.20            | 0.181                          | 2301.08            | 416.77             |
| A_68_P27561172 | chr11:4963946-4963990                             | NM_001190406:1362      | Gas2l1        | INSIDE                 | 0.342                                                        | 1.478                          | 1500.20            | 2217.22            | 0.505                          | 1179.52            | 596.05             |

| ProbeName      | Target position of probe on CpG island microarray | TargetID                | GeneSymbol    | CpG island Description | Ratio of relative methylation (TiO <sub>2</sub> -NP/Vehicle) | Sham group                     |                    |                    | TiO <sub>2</sub> -H group      |                    |                    |
|----------------|---------------------------------------------------|-------------------------|---------------|------------------------|--------------------------------------------------------------|--------------------------------|--------------------|--------------------|--------------------------------|--------------------|--------------------|
|                |                                                   |                         |               |                        |                                                              | Relative methylation (Cy5/Cy3) | Cy3 signal (Input) | Cy5 signal (MeDIP) | Relative methylation (Cy5/Cy3) | Cy3 signal (Input) | Cy5 signal (MeDIP) |
| A_68_P29703998 | chr14:71290922-71290966                           | NM_008115:1008          | Gfra2         | INSIDE                 | 0.342                                                        | 0.467                          | 2053.29            | 958.58             | 0.160                          | 1567.16            | 250.28             |
| A_68_P23927128 | chr5:100406693-100406737                          | NM_001077265:1243       | Hnrmpd        | INSIDE                 | 0.342                                                        | 0.657                          | 1887.39            | 1240.47            | 0.225                          | 1455.95            | 326.96             |
| A_68_P26222129 | chr8:123260367-123260411                          | NM_008320:113           | Irf8          | INSIDE                 | 0.342                                                        | 0.452                          | 1790.75            | 808.66             | 0.154                          | 1437.85            | 222.07             |
| A_68_P25587300 | chr7:148380302-148380347                          | NM_153777:-717          | Lrrc56        | PROMOTER               | 0.342                                                        | 0.583                          | 3378.94            | 1968.59            | 0.199                          | 2386.53            | 474.93             |
| A_68_P28089843 | chr11:104092753-104092797                         | NM_001038609:25         | Mapt          | INSIDE                 | 0.342                                                        | 0.509                          | 1566.11            | 797.20             | 0.174                          | 1253.98            | 218.61             |
| A_68_P25370975 | chr7:108160402-108160446                          | NM_008773:81            | P2ry2         | INSIDE                 | 0.342                                                        | 0.538                          | 2527.30            | 1359.55            | 0.184                          | 2030.92            | 373.19             |
| A_68_P31632700 | chr18:38371037-38371082                           | NM_029357:-1643         | Pcdh1         | PROMOTER               | 0.342                                                        | 0.613                          | 1613.63            | 988.37             | 0.209                          | 1201.91            | 251.75             |
| A_68_P23720369 | chr5:58111053-58111097                            | NM_018764:1815          | Pcdh7         | INSIDE                 | 0.342                                                        | 0.626                          | 2357.92            | 1475.45            | 0.214                          | 1774.01            | 379.78             |
| A_68_P25048763 | chr7:36119695-36119739                            | NM_027897:461           | Rhpn2         | INSIDE                 | 0.342                                                        | 0.501                          | 1703.30            | 852.57             | 0.171                          | 1380.89            | 236.65             |
| A_68_P20005837 | chr1:4486985-4487029                              | NM_011441:-512          | Sox17         | PROMOTER               | 0.342                                                        | 0.587                          | 1511.13            | 887.02             | 0.201                          | 1226.86            | 246.02             |
| A_68_P26891990 | chr9:122812568-122812612                          | NM_001177505:15002      | Zfp167        | DOWNSTREAM             | 0.342                                                        | 0.659                          | 1992.99            | 1312.63            | 0.226                          | 1603.40            | 361.64             |
| A_68_P23588919 | chr5:33785607-33785651                            |                         | Unknown       |                        | 0.342                                                        | 1.613                          | 2761.60            | 4455.18            | 0.552                          | 2013.65            | 1111.02            |
| A_68_P31412804 | chr17:86199724-86199768                           | AK142122:524            |               | INSIDE                 | 0.342                                                        | 0.515                          | 1096.31            | 564.62             | 0.176                          | 957.34             | 168.75             |
| A_68_P21503641 | chr2:106814392-106814436                          | NM_173750:-3866         | 2700007P21Rik | PROMOTER               | 0.341                                                        | 0.712                          | 3658.98            | 2605.11            | 0.243                          | 2707.00            | 657.80             |
| A_68_P20443149 | chr1:93437651-93437695                            | NM_023046:16            | Asb1          | INSIDE                 | 0.341                                                        | 0.604                          | 982.35             | 593.63             | 0.206                          | 826.95             | 170.48             |
| A_68_P28181189 | chr11:119803657-119803701                         | NM_001037754:-727       | Baiap2        | PROMOTER               | 0.341                                                        | 0.550                          | 2487.62            | 1367.46            | 0.187                          | 1801.34            | 337.58             |
| A_68_P23245376 | chr4:119088209-119088253                          | NM_029286:-104          | Ccdc30        | PROMOTER               | 0.341                                                        | 0.653                          | 1052.61            | 687.63             | 0.223                          | 849.73             | 189.12             |
| A_68_P31125922 | chr17:29231051-29231095                           | NM_007669:356           | Cdkn1a        | INSIDE                 | 0.341                                                        | 0.568                          | 1745.25            | 992.08             | 0.194                          | 1261.12            | 244.16             |
| A_68_P30512427 | chr16:4880947-4880994                             | NM_145359:-1119         | Fam100a       | DIVERGENT_PROMOTER     | 0.341                                                        | 0.480                          | 1328.98            | 638.19             | 0.164                          | 886.08             | 144.97             |
| A_68_P28669119 | chr12:99497006-99497050                           | NM_008079:519           | Galc          | INSIDE                 | 0.341                                                        | 0.571                          | 927.29             | 529.74             | 0.195                          | 704.18             | 137.34             |
| A_68_P28158436 | chr11:116143049-116143093                         | NM_010254:818           | Galr2         | INSIDE                 | 0.341                                                        | 0.630                          | 1348.14            | 848.69             | 0.215                          | 926.83             | 199.12             |
| A_68_P25089586 | chr7:52095494-52095538                            | NM_010215:3859          | Il4i1         | INSIDE                 | 0.341                                                        | 0.638                          | 2333.35            | 1487.96            | 0.218                          | 1821.13            | 396.55             |
| A_68_P21122681 | chr2:33487222-33487266                            | NM_010725:8787          | Lmx1b         | INSIDE                 | 0.341                                                        | 0.593                          | 1550.97            | 919.68             | 0.202                          | 1177.14            | 238.06             |
| A_68_P25279944 | chr7:90015164-90015208                            | NM_175366:-656          | Mex3b         | PROMOTER               | 0.341                                                        | 0.517                          | 1609.49            | 832.10             | 0.176                          | 1251.62            | 220.49             |
| A_68_P27285693 | chr10:80289215-80289268                           | NM_008753:-159          | Oaz1          | PROMOTER               | 0.341                                                        | 0.565                          | 1467.24            | 829.33             | 0.193                          | 1028.09            | 198.41             |
| A_68_P31757537 | chr18:61559490-61559534                           | NM_133249:573           | Ppargc1b      | INSIDE                 | 0.341                                                        | 0.406                          | 1984.91            | 805.32             | 0.138                          | 1502.22            | 207.54             |
| A_68_P27281038 | chr10:79578186-79578230                           | NM_011492:-1072         | Stk11         | PROMOTER               | 0.341                                                        | 0.659                          | 910.75             | 600.38             | 0.225                          | 707.91             | 159.15             |
| A_68_P24671557 | chr6:97129251-97129295                            | NM_001081111:-154       | Tmfl          | PROMOTER               | 0.341                                                        | 0.658                          | 1851.91            | 1218.68            | 0.224                          | 1396.22            | 313.41             |
| A_68_P24595035 | chr6:83661384-83661428                            | NM_011912:149           | Vax2          | INSIDE                 | 0.341                                                        | 0.577                          | 1338.25            | 772.15             | 0.197                          | 927.73             | 182.45             |
| A_68_P21394211 | chr2:84555629-84555673                            | NM_144887:-329          | Zdhhc5        | PROMOTER               | 0.341                                                        | 0.439                          | 4734.44            | 2076.53            | 0.150                          | 3532.02            | 528.54             |
| A_68_P25264702 | chr7:87226863-87226912                            | NM_175433:55774         | Zfp710        | INSIDE                 | 0.341                                                        | 1.610                          | 1303.70            | 2098.42            | 0.549                          | 951.92             | 522.55             |
| A_68_P20046441 | chr1:14497168-14497212                            |                         | Unknown       |                        | 0.341                                                        | 0.529                          | 1065.22            | 563.14             | 0.180                          | 867.58             | 156.52             |
| A_68_P22820135 | chr4:32325268-32325312                            | ENSMUST00000108180:-488 |               | PROMOTER               | 0.341                                                        | 0.622                          | 1872.87            | 1164.79            | 0.212                          | 1430.32            | 303.75             |
| A_68_P32260576 | chrX:11705862-11705906                            | NM_001168321:31597      | Bcor          | INSIDE                 | 0.340                                                        | 1.523                          | 1805.39            | 2748.90            | 0.517                          | 603.83             | 312.24             |
| A_68_P26815510 | chr9:108472099-108472144                          | NM_026378:-101          | Dalrd3        | PROMOTER               | 0.340                                                        | 0.353                          | 2690.95            | 951.19             | 0.120                          | 2178.95            | 261.88             |
| A_68_P26878194 | chr9:120402272-120402316                          | NM_026892:571           | Eif1b         | INSIDE                 | 0.340                                                        | 0.643                          | 1232.01            | 792.49             | 0.219                          | 908.79             | 198.62             |
| A_68_P26132610 | chr8:107792581-107792625                          | NM_015821:4055          | Fbxl8         | INSIDE                 | 0.340                                                        | 0.605                          | 1463.87            | 886.37             | 0.206                          | 1127.49            | 232.42             |
| A_68_P27897164 | chr11:69614462-69614506                           | NM_010198:643           | Fgf11         | INSIDE                 | 0.340                                                        | 0.317                          | 2021.17            | 640.82             | 0.108                          | 1463.23            | 157.89             |
| A_68_P21221945 | chr2:52717198-52717242                            | NM_172409:319           | Fmn12         | INSIDE                 | 0.340                                                        | 0.583                          | 2460.09            | 1434.58            | 0.198                          | 1766.26            | 349.74             |
| A_68_P20644037 | chr1:138028308-138028352                          | NM_001039472:353        | Kif21b        | INSIDE                 | 0.340                                                        | 0.522                          | 1919.86            | 1001.71            | 0.177                          | 1596.07            | 282.84             |
| A_68_P29110675 | chr13:68720936-68720980                           | NM_172480:40            | Mtrr          | INSIDE                 | 0.340                                                        | 0.574                          | 1799.72            | 1033.33            | 0.195                          | 1338.83            | 261.01             |
| A_68_P29773655 | chr14:84847043-84847087                           | NM_001013753:3695       | Pcdh17        | INSIDE                 | 0.340                                                        | 0.515                          | 1272.98            | 656.18             | 0.175                          | 1056.78            | 185.20             |
| A_68_P25030468 | chr7:31017900-31017944                            | NM_027259:830           | Polr2i        | INSIDE                 | 0.340                                                        | 0.513                          | 1782.34            | 914.06             | 0.174                          | 1180.51            | 205.75             |
| A_68_P25506340 | chr7:134732564-134732608                          | NM_172281:375           | Rnf40         | INSIDE                 | 0.340                                                        | 1.706                          | 2715.64            | 4631.89            | 0.579                          | 1880.58            | 1089.29            |
| A_68_P24007309 | chr5:115462025-115462071                          | NM_029012:516           | Sppl3         | INSIDE                 | 0.340                                                        | 2.073                          | 1933.68            | 4008.61            | 0.705                          | 1553.83            | 1094.99            |
| A_68_P30344892 | chr15:75741160-75741204                           | NM_178646:1018          | Tigd5         | INSIDE                 | 0.340                                                        | 0.640                          | 3566.60            | 2282.79            | 0.218                          | 2745.60            | 597.69             |
| A_68_P22856581 | chr4:40216815-40216859                            | NM_134097:38            | Topors        | INSIDE                 | 0.340                                                        | 0.655                          | 831.30             | 544.49             | 0.223                          | 700.62             | 156.13             |
| A_68_P31210125 | chr17:47147460-47147504                           | NM_001177374:-1         | Ubr2          | PROMOTER               | 0.340                                                        | 0.467                          | 1693.61            | 790.74             | 0.159                          | 1214.67            | 192.81             |
| A_68_P24124995 | chr5:137735672-137735716                          | NM_027356:-202          | Ufsp1         | PROMOTER               | 0.340                                                        | 1.516                          | 984.83             | 1492.78            | 0.515                          | 738.67             | 380.39             |
| A_68_P25581335 | chr7:147129738-147129782                          | NM_009482:6             | Utf1          | INSIDE                 | 0.340                                                        | 0.504                          | 2430.42            | 1224.45            | 0.171                          | 1909.32            | 326.69             |
| A_68_P24973141 | chr7:13403835-13403879                            | NM_026046:353           | Zfp329        | INSIDE                 | 0.340                                                        | 0.530                          | 1288.31            | 682.69             | 0.180                          | 1080.60            | 194.90             |

| ProbeName      | Target position of probe on CpG island microarray | TargetID               | GeneSymbol    | CpG island Description | Ratio of relative methylation (TiO <sub>2</sub> -NP/Vehicle) | Sham group                     |                    |                    | TiO <sub>2</sub> -H group      |                    |                    |
|----------------|---------------------------------------------------|------------------------|---------------|------------------------|--------------------------------------------------------------|--------------------------------|--------------------|--------------------|--------------------------------|--------------------|--------------------|
|                |                                                   |                        |               |                        |                                                              | Relative methylation (Cy5/Cy3) | Cy3 signal (Input) | Cy5 signal (MeDIP) | Relative methylation (Cy5/Cy3) | Cy3 signal (Input) | Cy5 signal (MeDIP) |
| A_68_P31256669 | chr17:56651021-56651065                           | NM_011483:864          | Znrf4         | INSIDE                 | 0.340                                                        | 0.683                          | 2859.56            | 1951.67            | 0.232                          | 2164.65            | 503.03             |
| A_68_P26892246 | chr9:122859846-122859890                          | NM_025419:250          | 1110059G10Rik | INSIDE                 | 0.339                                                        | 0.569                          | 2083.75            | 1185.89            | 0.193                          | 1729.49            | 333.35             |
| A_68_P28463397 | chr12:58677434-58677478                           | NM_001037743:12355     | 4921506M07Rik | INSIDE                 | 0.339                                                        | 0.725                          | 1649.62            | 1195.56            | 0.246                          | 1211.69            | 298.10             |
| A_68_P24122101 | chr5:137043954-137043998                          | NM_009986:-675         | Cux1          | PROMOTER               | 0.339                                                        | 0.571                          | 1610.95            | 919.22             | 0.194                          | 1380.86            | 267.45             |
| A_68_P25952523 | chr8:73063414-73063459                            | NM_007924:-137         | Eil1          | PROMOTER               | 0.339                                                        | 0.622                          | 1705.78            | 1060.79            | 0.211                          | 1280.19            | 269.65             |
| A_68_P24859168 | chr6:133985011-133985055                          | NM_007961:-692         | Etv6          | PROMOTER               | 0.339                                                        | 0.684                          | 2321.36            | 1588.07            | 0.232                          | 1712.62            | 397.63             |
| A_68_P24609727 | chr6:86315530-86315574                            | NM_025591:-124         | Fam136a       | PROMOTER               | 0.339                                                        | 0.705                          | 6052.97            | 4269.05            | 0.239                          | 4767.19            | 1140.80            |
| A_68_P24992615 | chr7:19895551-19895595                            | NM_008036:-178         | Fosb          | PROMOTER               | 0.339                                                        | 0.558                          | 1114.98            | 622.51             | 0.189                          | 933.85             | 176.96             |
| A_68_P22342884 | chr3:95022045-95022089                            | NM_029885:-202         | Gabpb2        | PROMOTER               | 0.339                                                        | 0.656                          | 956.74             | 627.92             | 0.222                          | 804.86             | 179.06             |
| A_68_P29625860 | chr14:57676319-57676363                           | NM_016975:442          | Gja3          | INSIDE                 | 0.339                                                        | 0.516                          | 1227.11            | 632.98             | 0.175                          | 1065.22            | 186.06             |
| A_68_P25661487 | chr8:12430676-12430720                            | NR_027975:44928        | Gm5607        | INSIDE                 | 0.339                                                        | 0.526                          | 1959.63            | 1030.26            | 0.178                          | 1552.09            | 276.81             |
| A_68_P21283787 | chr2:64861006-64861050                            | NM_016719:-205         | Grb14         | PROMOTER               | 0.339                                                        | 0.576                          | 1649.62            | 950.03             | 0.195                          | 1437.21            | 280.90             |
| A_68_P30880659 | chr16:75766853-75766897                           | NM_030201:189          | Hspa13        | INSIDE                 | 0.339                                                        | 0.641                          | 1975.32            | 1266.08            | 0.217                          | 1430.94            | 311.12             |
| A_68_P23277861 | chr4:125724192-125724236                          | NM_025544:43           | Mrps15        | INSIDE                 | 0.339                                                        | 0.569                          | 1751.68            | 996.75             | 0.193                          | 1354.29            | 261.39             |
| A_68_P30368846 | chr15:79664558-79664602                           | NM_001013360:183       | Nped          | INSIDE                 | 0.339                                                        | 0.432                          | 1901.98            | 822.09             | 0.147                          | 1392.49            | 204.25             |
| A_68_P31731073 | chr18:56722210-56722254                           | NM_001162989:10        | Phax          | INSIDE                 | 0.339                                                        | 0.611                          | 1265.55            | 772.81             | 0.207                          | 1014.37            | 209.81             |
| A_68_P23610099 | chr5:37261384-37261428                            | NM_172994:1598         | Ppp2r2c       | INSIDE                 | 0.339                                                        | 0.521                          | 2486.87            | 1296.63            | 0.177                          | 1877.70            | 331.55             |
| A_68_P30577452 | chr16:18089136-18089180                           | NM_011172:125          | Prodh         | INSIDE                 | 0.339                                                        | 0.406                          | 1428.07            | 579.57             | 0.138                          | 1030.07            | 141.71             |
| A_68_P30348859 | chr15:76348629-76348673                           | NM_130893:3909         | Sert1         | INSIDE                 | 0.339                                                        | 0.476                          | 1845.93            | 877.89             | 0.161                          | 1351.96            | 218.04             |
| A_68_P22683258 | chr3:157694818-157694868                          | NM_001093753:-124      | Srsf11        | PROMOTER               | 0.339                                                        | 0.643                          | 1098.09            | 706.04             | 0.218                          | 903.15             | 196.63             |
| A_68_P31125470 | chr17:29144780-29144824                           | NM_134115:80           | Stk38         | INSIDE                 | 0.339                                                        | 0.543                          | 1290.56            | 700.74             | 0.184                          | 959.77             | 176.47             |
| A_68_P29730261 | chr14:76244654-76244698                           | NM_009429:-386         | Tpt1          | PROMOTER               | 0.339                                                        | 0.504                          | 2082.32            | 1050.12            | 0.171                          | 1574.00            | 269.35             |
| A_68_P32700072 | chrX:137134843-137134887                          | NM_001077364:197       | Tsc22d3       | INSIDE                 | 0.339                                                        | 7.001                          | 3913.06            | 27395.46           | 2.371                          | 1903.95            | 4514.37            |
| A_68_P32134136 | chr19:44821411-44821455                           |                        | Unknown       |                        | 0.339                                                        | 0.671                          | 2274.38            | 1526.71            | 0.228                          | 1664.19            | 378.69             |
| A_68_P20936907 | chr1:193048234-193048279                          | ENSMUST00000169806:-94 |               | PROMOTER               | 0.339                                                        | 0.668                          | 1059.66            | 707.40             | 0.226                          | 850.47             | 192.23             |
| A_68_P25093324 | chr7:52722052-52722096                            | NM_007527:194          | Bax           | INSIDE                 | 0.338                                                        | 0.512                          | 1886.42            | 965.17             | 0.173                          | 1529.95            | 264.53             |
| A_68_P24438772 | chr6:50516320-50516364                            | NM_007808:131          | Cy5c          | INSIDE                 | 0.338                                                        | 0.389                          | 1792.99            | 697.19             | 0.131                          | 1553.85            | 204.01             |
| A_68_P24138252 | chr5:140384071-140384115                          | NM_175522:196          | Elfn1         | INSIDE                 | 0.338                                                        | 0.583                          | 1399.90            | 815.47             | 0.197                          | 1168.09            | 230.30             |
| A_68_P20317723 | chr1:69154010-69154069                            | NM_010154:594          | ErbB4         | INSIDE                 | 0.338                                                        | 1.371                          | 1345.01            | 1844.25            | 0.463                          | 1261.90            | 584.09             |
| A_68_P27267010 | chr10:76721714-76721758                           | NR_026944:232          | Gm10941       | INSIDE                 | 0.338                                                        | 0.602                          | 1017.53            | 612.92             | 0.204                          | 810.65             | 165.13             |
| A_68_P23819789 | chr5:77524030-77524074                            | NM_001159900:240       | Hopx          | INSIDE                 | 0.338                                                        | 0.698                          | 1624.76            | 1134.48            | 0.236                          | 1430.51            | 337.68             |
| A_68_P28043703 | chr11:96176215-96176259                           | NR_029784:-2242        | Mir10a        | PROMOTER               | 0.338                                                        | 0.480                          | 1343.98            | 645.55             | 0.162                          | 1215.40            | 197.05             |
| A_68_P28055765 | chr11:98199818-98199862                           | NM_010895:-8881        | Neurod2       | PROMOTER               | 0.338                                                        | 0.529                          | 1873.82            | 992.10             | 0.179                          | 1372.85            | 245.61             |
| A_68_P20418214 | chr1:89406592-89406636                            | NM_019867:323          | Ngef          | INSIDE                 | 0.338                                                        | 0.484                          | 3915.00            | 1895.24            | 0.164                          | 3017.43            | 493.49             |
| A_68_P22422580 | chr3:109946888-109946938                          | NM_001163348:-522      | Ntng1         | PROMOTER               | 0.338                                                        | 0.560                          | 2088.91            | 1170.50            | 0.189                          | 1590.07            | 301.02             |
| A_68_P21913062 | chr2:181572751-181572795                          | NM_153594:165          | Pemt2         | INSIDE                 | 0.338                                                        | 0.523                          | 2130.87            | 1115.14            | 0.177                          | 1539.97            | 272.28             |
| A_68_P30652429 | chr16:32431312-32431356                           | NM_001163160:19        | Pcyt1a        | INSIDE                 | 0.338                                                        | 0.624                          | 1228.22            | 766.59             | 0.211                          | 906.99             | 191.58             |
| A_68_P26429011 | chr9:36953245-36953299                            | NM_001029838:1579      | Pknox2        | INSIDE                 | 0.338                                                        | 0.468                          | 1242.53            | 581.44             | 0.158                          | 990.49             | 156.59             |
| A_68_P23152967 | chr4:100741468-100741512                          | NM_183024:-152         | Raver2        | PROMOTER               | 0.338                                                        | 0.552                          | 1400.97            | 773.23             | 0.187                          | 1240.37            | 231.50             |
| A_68_P28137844 | chr11:112645388-112645432                         | NM_011448:1887         | Sox9          | INSIDE                 | 0.338                                                        | 0.507                          | 1581.52            | 801.59             | 0.171                          | 1241.06            | 212.67             |
| A_68_P27006965 | chr10:23869254-23869298                           | NM_016797:154          | Stx7          | INSIDE                 | 0.338                                                        | 0.311                          | 1938.48            | 603.50             | 0.105                          | 1686.79            | 177.73             |
| A_68_P26564381 | chr9:61220364-61220408                            | NM_001083927:214       | Tle3          | INSIDE                 | 0.338                                                        | 0.459                          | 1810.81            | 831.47             | 0.155                          | 1404.45            | 218.13             |
| A_68_P28149096 | chr11:114537102-114537146                         | NM_053273:343          | Ttyh2         | INSIDE                 | 0.338                                                        | 0.584                          | 1186.00            | 692.48             | 0.197                          | 917.64             | 181.19             |
| A_68_P32321786 | chrX:34650071-34650115                            | NM_026573:225          | Upf3b         | INSIDE                 | 0.338                                                        | 1.475                          | 1569.57            | 2315.84            | 0.499                          | 628.25             | 313.59             |
| A_68_P30778633 | chr16:55973743-55973787                           | NM_173026:-152         | Zbtb11        | PROMOTER               | 0.338                                                        | 0.639                          | 1822.62            | 1164.11            | 0.216                          | 1614.97            | 348.49             |
| A_68_P31918868 | chr19:3708036-3708080                             | NM_028077:-274         | 1810055G02Rik | PROMOTER               | 0.337                                                        | 0.436                          | 1462.67            | 638.10             | 0.147                          | 1340.36            | 196.90             |
| A_68_P24430831 | chr6:49024182-49024226                            | NM_029353:411          | 2410003K15Rik | INSIDE                 | 0.337                                                        | 0.620                          | 1526.36            | 946.80             | 0.209                          | 1324.44            | 277.11             |
| A_68_P27285911 | chr10:80318512-80318556                           | NM_175195:515          | 3110056G03Rik | INSIDE                 | 0.337                                                        | 0.551                          | 1278.89            | 704.99             | 0.186                          | 997.38             | 185.43             |
| A_68_P28463396 | chr12:58677361-58677405                           | NM_001037743:12281     | 4921506M07Rik | INSIDE                 | 0.337                                                        | 0.690                          | 2575.94            | 1778.36            | 0.233                          | 1996.79            | 464.33             |
| A_68_P26132762 | chr8:107813304-107813348                          | NM_001166394:102       | 4931428F04Rik | INSIDE                 | 0.337                                                        | 0.654                          | 2913.44            | 1904.57            | 0.220                          | 2154.06            | 474.43             |
| A_68_P26505580 | chr9:50583427-50583471                            | NM_133981:14           | Alig9         | INSIDE                 | 0.337                                                        | 0.698                          | 2005.94            | 1400.85            | 0.235                          | 1403.20            | 330.31             |

| ProbeName      | Target position of probe on CpG island microarray | TargetID            | GeneSymbol    | CpG island Description | Ratio of relative methylation (TiO <sub>2</sub> -NP/Vehicle) | Sham group                     |                    |                    | TiO <sub>2</sub> -H group      |                    |                    |
|----------------|---------------------------------------------------|---------------------|---------------|------------------------|--------------------------------------------------------------|--------------------------------|--------------------|--------------------|--------------------------------|--------------------|--------------------|
|                |                                                   |                     |               |                        |                                                              | Relative methylation (Cy5/Cy3) | Cy3 signal (Input) | Cy5 signal (MeDIP) | Relative methylation (Cy5/Cy3) | Cy3 signal (Input) | Cy5 signal (MeDIP) |
| A_68_P31899554 | chr18:86882710-86882754                           | NM_172633:293       | Cbln2         | INSIDE                 | 0.337                                                        | 0.554                          | 1159.27            | 642.23             | 0.186                          | 982.22             | 183.16             |
| A_68_P22765609 | chr4:19497322-19497369                            | NM_027769:94        | Cpnc3         | DIVERGENT_PROMOTER     | 0.337                                                        | 0.512                          | 3128.24            | 1601.48            | 0.173                          | 2299.02            | 396.63             |
| A_68_P31158507 | chr17:35378777-35378821                           | NM_019693:108       | Ddx39b        | INSIDE                 | 0.337                                                        | 0.374                          | 2398.36            | 896.01             | 0.126                          | 1755.58            | 220.71             |
| A_68_P30478222 | chr15:98927785-98927829                           | NM_176835:2108      | Dnajc22       | DIVERGENT_PROMOTER     | 0.337                                                        | 0.662                          | 1175.81            | 778.42             | 0.223                          | 900.94             | 200.98             |
| A_68_P30988904 | chr16:95924063-95924107                           | NM_011809:71        | Ets2          | INSIDE                 | 0.337                                                        | 0.740                          | 3358.88            | 2485.54            | 0.250                          | 2387.72            | 596.09             |
| A_68_P24620341 | chr6:88146759-88146803                            | NM_008090:-1877     | Gata2         | PROMOTER               | 0.337                                                        | 0.552                          | 923.90             | 510.19             | 0.186                          | 654.05             | 121.79             |
| A_68_P26546339 | chr9:58046840-58046884                            | NM_001161535:2660   | Islr2         | INSIDE                 | 0.337                                                        | 0.666                          | 2409.98            | 1605.34            | 0.224                          | 1693.87            | 379.84             |
| A_68_P30477055 | chr15:98701709-98701753                           | NM_001033276:-116   | Mil2          | PROMOTER               | 0.337                                                        | 0.432                          | 1460.87            | 630.65             | 0.146                          | 1215.27            | 176.94             |
| A_68_P30363155 | chr15:78745009-78745053                           | NM_020271:682       | Pdpx          | INSIDE                 | 0.337                                                        | 0.682                          | 2950.08            | 2011.01            | 0.229                          | 1987.34            | 456.04             |
| A_68_P22450818 | chr3:116414578-116414622                          | NM_144902:598       | Slc35a3       | INSIDE                 | 0.337                                                        | 0.498                          | 2384.90            | 1187.78            | 0.168                          | 1934.40            | 324.78             |
| A_68_P26363429 | chr9:24578655-24578699                            | NM_194263:71        | Tbx20         | INSIDE                 | 0.337                                                        | 0.556                          | 1024.81            | 569.50             | 0.187                          | 912.00             | 170.62             |
| A_68_P29733550 | chr14:76815819-76815868                           | NM_207652:216       | Tsc22d1       | INSIDE                 | 0.337                                                        | 0.659                          | 1206.39            | 794.62             | 0.222                          | 889.10             | 197.56             |
| A_68_P20858578 | chr1:179187386-179187430                          | NM_011785:-8510     | Akt3          | PROMOTER               | 0.336                                                        | 0.610                          | 1755.05            | 1071.10            | 0.205                          | 1321.79            | 271.31             |
| A_68_P21007913 | chr2:11700124-11700174                            | NM_177268:769       | Ankrd16       | INSIDE                 | 0.336                                                        | 0.538                          | 1281.37            | 689.48             | 0.181                          | 928.52             | 167.72             |
| A_68_P23576171 | chr5:31357229-31357273                            | NM_023525:67        | Cad           | INSIDE                 | 0.336                                                        | 0.693                          | 1630.74            | 1130.54            | 0.233                          | 1334.36            | 310.43             |
| A_68_P26141981 | chr8:109417694-109417738                          | NM_011574:177       | Cirh1a        | INSIDE                 | 0.336                                                        | 0.719                          | 1877.59            | 1350.27            | 0.241                          | 1458.53            | 352.21             |
| A_68_P27800933 | chr11:52578613-52578657                           | NM_177059:427       | Fstl4         | INSIDE                 | 0.336                                                        | 0.529                          | 2350.07            | 1242.50            | 0.178                          | 1799.39            | 319.63             |
| A_68_P26886025 | chr9:121766341-121766385                          | NM_001112668:287    | Gm9790        | INSIDE                 | 0.336                                                        | 0.568                          | 3536.66            | 2007.95            | 0.191                          | 2439.06            | 465.53             |
| A_68_P21073102 | chr2:25434469-25434514                            | NM_001005424:1128   | Gm996         | INSIDE                 | 0.336                                                        | 1.548                          | 1725.74            | 2672.20            | 0.520                          | 1236.81            | 642.79             |
| A_68_P26875190 | chr9:119846515-119846559                          | NM_028976:140       | Gorasp1       | INSIDE                 | 0.336                                                        | 0.582                          | 3904.44            | 2271.27            | 0.196                          | 2671.26            | 522.69             |
| A_68_P24116811 | chr5:136020789-136020833                          | NM_146001:182       | Hip1          | INSIDE                 | 0.336                                                        | 0.648                          | 1656.74            | 1073.41            | 0.218                          | 1180.12            | 256.84             |
| A_68_P21902323 | chr2:179959846-179959890                          | NM_001081171:696    | Lama5         | INSIDE                 | 0.336                                                        | 0.279                          | 2052.96            | 573.01             | 0.094                          | 1737.11            | 162.97             |
| A_68_P27787817 | chr11:50106087-50106131                           | NM_175334:-270      | Maml1         | PROMOTER               | 0.336                                                        | 0.529                          | 1025.84            | 543.18             | 0.178                          | 817.07             | 145.50             |
| A_68_P31161220 | chr17:35978699-35978752                           | NM_001010833:283    | Mdc1          | INSIDE                 | 0.336                                                        | 0.678                          | 1164.75            | 789.22             | 0.227                          | 855.22             | 194.47             |
| A_68_P29322931 | chr13:111185370-111185414                         | NM_152804:141       | Plk2          | INSIDE                 | 0.336                                                        | 0.427                          | 1874.97            | 800.72             | 0.143                          | 1439.94            | 206.36             |
| A_68_P21307667 | chr2:69043827-69043871                            | NM_001199123:399    | Spe25         | INSIDE                 | 0.336                                                        | 0.484                          | 1184.98            | 573.10             | 0.163                          | 914.60             | 148.81             |
| A_68_P21901050 | chr2:179777293-179777337                          | NM_178750:127       | Ss18l1        | INSIDE                 | 0.336                                                        | 0.482                          | 2057.89            | 992.10             | 0.162                          | 1514.67            | 245.47             |
| A_68_P22500445 | chr3:125641287-125641331                          | NM_011674:160       | Ugt8a         | INSIDE                 | 0.336                                                        | 0.490                          | 3569.56            | 1747.63            | 0.164                          | 2752.41            | 452.21             |
| A_68_P24541411 | chr6:72330618-72330663                            | NM_001080742:-178   | Vamp5         | PROMOTER               | 0.336                                                        | 0.706                          | 1265.76            | 894.05             | 0.237                          | 952.72             | 226.24             |
| A_68_P20935796 | chr1:192849520-192849564                          | NR_027298:313       | A230020J21Rik | INSIDE                 | 0.335                                                        | 0.455                          | 1278.55            | 582.32             | 0.153                          | 988.28             | 150.85             |
| A_68_P22055030 | chr3:35653187-35653231                            | NM_029570:149       | Atp11b        | INSIDE                 | 0.335                                                        | 0.485                          | 2517.63            | 1220.74            | 0.163                          | 1939.55            | 315.50             |
| A_68_P31936824 | chr19:7016562-7016606                             | NM_007522:240       | Bad           | INSIDE                 | 0.335                                                        | 0.552                          | 1852.09            | 1022.11            | 0.185                          | 1346.95            | 248.86             |
| A_68_P25313629 | chr7:97592324-97592368                            | NM_145151:1056      | Crebzf        | INSIDE                 | 0.335                                                        | 0.576                          | 3401.89            | 1959.86            | 0.193                          | 2509.54            | 484.51             |
| A_68_P25952440 | chr8:73051499-73051543                            | NM_001111066:-121   | Fkbp8         | DIVERGENT_PROMOTER     | 0.335                                                        | 0.630                          | 1257.36            | 792.22             | 0.211                          | 901.38             | 189.99             |
| A_68_P23222364 | chr4:114598169-114598213                          | NM_015758:428       | Foxc3         | INSIDE                 | 0.335                                                        | 0.481                          | 2199.74            | 1058.09            | 0.161                          | 1748.13            | 281.77             |
| A_68_P24838573 | chr6:128313280-128313324                          | NM_008021:291       | Foxm1         | INSIDE                 | 0.335                                                        | 0.536                          | 2103.41            | 1127.86            | 0.179                          | 1542.37            | 276.72             |
| A_68_P31940698 | chr19:7686824-7686868                             | NM_025731:-212      | Hrasl5        | DIVERGENT_PROMOTER     | 0.335                                                        | 0.574                          | 1405.93            | 806.98             | 0.192                          | 1006.23            | 193.20             |
| A_68_P20832488 | chr1:174271323-174271367                          | NM_001039484:4      | Kenj10        | INSIDE                 | 0.335                                                        | 0.681                          | 2205.64            | 1501.20            | 0.228                          | 1514.61            | 345.65             |
| A_68_P23588231 | chr5:33678100-33678145                            | NM_021500:98        | Maea          | PROMOTER               | 0.335                                                        | 0.614                          | 2204.00            | 1352.69            | 0.206                          | 1881.81            | 387.36             |
| A_68_P24929768 | chr6:146591129-146591173                          | NM_025315:50        | Med21         | INSIDE                 | 0.335                                                        | 0.478                          | 1517.62            | 725.11             | 0.160                          | 1248.74            | 199.94             |
| A_68_P24008164 | chr5:115608110-115608154                          | NM_175403:53        | Mlec          | INSIDE                 | 0.335                                                        | 0.375                          | 1561.27            | 585.26             | 0.125                          | 1484.05            | 186.17             |
| A_68_P20088284 | chr1:23390288-23390332                            | NM_001081079:-296   | Ogfr1         | PROMOTER               | 0.335                                                        | 0.497                          | 1281.57            | 637.48             | 0.167                          | 1031.91            | 171.96             |
| A_68_P26980660 | chr10:19077044-19077088                           | NM_053008:722       | Olig3         | INSIDE                 | 0.335                                                        | 0.729                          | 7665.22            | 5584.24            | 0.244                          | 5365.06            | 1310.44            |
| A_68_P25184944 | chr7:73007570-73007614                            | NM_011048:571       | Pesk6         | INSIDE                 | 0.335                                                        | 0.459                          | 2435.49            | 1117.45            | 0.154                          | 1976.39            | 303.45             |
| A_68_P20506801 | chr1:108068058-108068102                          | NM_133821:-365      | Phlpp1        | PROMOTER               | 0.335                                                        | 0.566                          | 2301.60            | 1302.82            | 0.190                          | 1736.91            | 329.71             |
| A_68_P27509905 | chr10:122115624-122115668                         | NM_176919:-171      | Ppm1h         | PROMOTER               | 0.335                                                        | 0.507                          | 1496.26            | 758.69             | 0.170                          | 1244.74            | 211.29             |
| A_68_P20083594 | chr1:22540800-22540844                            | NM_001012623:271741 | Rims1         | INSIDE                 | 0.335                                                        | 0.662                          | 1033.37            | 683.92             | 0.222                          | 850.72             | 188.60             |
| A_68_P24693485 | chr6:100620652-100620698                          | NM_181590:477       | Shq1          | INSIDE                 | 0.335                                                        | 0.657                          | 899.49             | 590.54             | 0.220                          | 840.75             | 185.09             |
| A_68_P25033088 | chr7:31514777-31514828                            | NM_027215:-249      | Tmem147       | PROMOTER               | 0.335                                                        | 0.447                          | 1556.57            | 695.32             | 0.150                          | 1142.35            | 171.09             |
| A_68_P29493855 | chr14:29319194-29319238                           | NM_009524:558       | Wnt5a         | INSIDE                 | 0.335                                                        | 0.439                          | 1319.01            | 578.59             | 0.147                          | 1027.20            | 150.84             |
| A_68_P21747251 | chr2:151855031-151855075                          |                     | Unknown       |                        | 0.335                                                        | 0.666                          | 1085.05            | 723.14             | 0.223                          | 779.00             | 173.74             |

| ProbeName      | Target position of probe on CpG island microarray | TargetID                | GeneSymbol    | CpG island Description | Ratio of relative methylation (TiO <sub>2</sub> -NP/Vehicle) | Sham group                     |                    |                    | TiO <sub>2</sub> -H group      |                    |                    |
|----------------|---------------------------------------------------|-------------------------|---------------|------------------------|--------------------------------------------------------------|--------------------------------|--------------------|--------------------|--------------------------------|--------------------|--------------------|
|                |                                                   |                         |               |                        |                                                              | Relative methylation (Cy5/Cy3) | Cy3 signal (Input) | Cy5 signal (MeDIP) | Relative methylation (Cy5/Cy3) | Cy3 signal (Input) | Cy5 signal (MeDIP) |
| A_68_P28336337 | chr12:33063533-33063581                           | NM_001162903-97         | 2010109K11Rik | PROMOTER               | 0.334                                                        | 1.633                          | 1193.02            | 1947.75            | 0.545                          | 864.99             | 471.39             |
| A_68_P22987051 | chr4:66064069-66064114                            | NM_019514:1426          | Astn2         | INSIDE                 | 0.334                                                        | 0.582                          | 1421.91            | 827.13             | 0.194                          | 1118.36            | 217.36             |
| A_68_P21835087 | chr2:167174410-167174454                          | NM_019835:246           | B4galt5       | INSIDE                 | 0.334                                                        | 0.599                          | 1762.22            | 1055.89            | 0.200                          | 1334.71            | 267.18             |
| A_68_P22871974 | chr4:43506583-43506627                            | NM_001037913:368        | Ccdc107       | INSIDE                 | 0.334                                                        | 0.565                          | 1528.06            | 862.84             | 0.188                          | 1207.56            | 227.47             |
| A_68_P31376859 | chr17:79754745-79754789                           | NM_026514:-335          | Cdc42ep3      | PROMOTER               | 0.334                                                        | 0.667                          | 1932.72            | 1289.86            | 0.223                          | 1495.43            | 333.82             |
| A_68_P30261335 | chr15:60656490-60656535                           | NM_001162926:123        | Fam84b        | INSIDE                 | 0.334                                                        | 0.514                          | 1333.29            | 684.70             | 0.171                          | 964.41             | 165.17             |
| A_68_P26085825 | chr8:98411955-98411999                            | NM_010325:289           | Got2          | INSIDE                 | 0.334                                                        | 0.623                          | 1481.30            | 923.05             | 0.208                          | 1115.16            | 232.23             |
| A_68_P25090530 | chr7:52253328-52253372                            | NM_016849:321           | Irf3          | INSIDE                 | 0.334                                                        | 0.476                          | 1097.47            | 522.34             | 0.159                          | 967.49             | 153.74             |
| A_68_P24055951 | chr5:123939417-123939461                          | NM_001033461:105        | Lrre43        | INSIDE                 | 0.334                                                        | 0.464                          | 2379.21            | 1103.66            | 0.155                          | 1826.63            | 283.02             |
| A_68_P30547089 | chr16:11254525-11254569                           | NR_035466:-8            | Mir1945       | PROMOTER               | 0.334                                                        | 0.565                          | 961.64             | 543.77             | 0.189                          | 806.61             | 152.19             |
| A_68_P22858433 | chr4:40669503-40669547                            | NR_029594:-425          | Mir207        | PROMOTER               | 0.334                                                        | 0.447                          | 2107.54            | 941.45             | 0.149                          | 1743.33            | 260.30             |
| A_68_P28152870 | chr11:115196117-115196161                         | NM_027132:91            | Otop3         | INSIDE                 | 0.334                                                        | 0.530                          | 1083.19            | 574.39             | 0.177                          | 850.05             | 150.77             |
| A_68_P28940997 | chr13:34966103-34966147                           | NM_013830:-1238         | Prpf4b        | PROMOTER               | 0.334                                                        | 0.645                          | 834.93             | 538.32             | 0.216                          | 691.14             | 148.99             |
| A_68_P25090924 | chr7:52309475-52309519                            | NM_022999:7526          | Prrg2         | INSIDE                 | 0.334                                                        | 0.547                          | 1987.85            | 1086.59            | 0.182                          | 1528.63            | 278.69             |
| A_68_P20240054 | chr1:55084325-55084372                            | NM_031179:-26           | Sf3b1         | PROMOTER               | 0.334                                                        | 0.467                          | 1224.59            | 572.11             | 0.156                          | 1049.46            | 163.67             |
| A_68_P21319124 | chr2:71205525-71205575                            | NM_172436:61            | Sle25a12      | INSIDE                 | 0.334                                                        | 0.604                          | 1138.58            | 688.07             | 0.202                          | 846.80             | 170.93             |
| A_68_P29581356 | chr14:47896866-47896910                           | NM_080843:71            | Soes4         | INSIDE                 | 0.334                                                        | 0.538                          | 2225.72            | 1196.94            | 0.180                          | 1783.39            | 320.60             |
| A_68_P31383394 | chr17:80879061-80879105                           | NM_009231:711           | Sos1          | INSIDE                 | 0.334                                                        | 0.444                          | 2345.35            | 1041.49            | 0.149                          | 1857.25            | 275.85             |
| A_68_P21556051 | chr2:116946577-116946621                          | NM_033524:-587          | Spred1        | PROMOTER               | 0.334                                                        | 0.440                          | 3528.51            | 1554.07            | 0.147                          | 2790.48            | 410.47             |
| A_68_P22894258 | chr4:47365465-47365509                            | NM_009370:-690          | Tgfbfr1       | PROMOTER               | 0.334                                                        | 0.574                          | 1331.23            | 764.62             | 0.192                          | 892.00             | 171.18             |
| A_68_P31004585 | chr17:3327130-3327174                             | NM_001122998:580        | Tiam2         | INSIDE                 | 0.334                                                        | 0.526                          | 1005.00            | 528.23             | 0.176                          | 833.81             | 146.50             |
| A_68_P24760052 | chr6:113481369-113481416                          | NM_175101:240           | Tmem111       | INSIDE                 | 0.334                                                        | 0.605                          | 898.06             | 543.45             | 0.202                          | 731.96             | 147.75             |
| A_68_P20151307 | chr1:36996847-36996891                            | NM_018872:-496          | Tmem131       | PROMOTER               | 0.334                                                        | 0.430                          | 1668.97            | 718.43             | 0.144                          | 1315.97            | 188.97             |
| A_68_P32008155 | chr19:21853166-21853210                           | NM_001033759:357        | Tmem2         | INSIDE                 | 0.334                                                        | 0.550                          | 1254.36            | 689.67             | 0.184                          | 1016.56            | 186.79             |
| A_68_P26023333 | chr8:87561242-87561290                            | NM_001122843:200        | Tnpo2         | INSIDE                 | 0.334                                                        | 5.335                          | 1922.75            | 10257.39           | 1.781                          | 1145.10            | 2039.63            |
| A_68_P30250626 | chr15:58704469-58704513                           | NM_026642:287           | Trmt12        | INSIDE                 | 0.334                                                        | 0.599                          | 984.69             | 590.16             | 0.200                          | 773.72             | 154.87             |
| A_68_P29211814 | chr13:90229104-90229154                           | NM_028012:85            | Xrcc4         | INSIDE                 | 0.334                                                        | 0.629                          | 1117.32            | 703.03             | 0.210                          | 843.60             | 177.21             |
| A_68_P27896952 | chr11:69579759-69579803                           | NM_029348:367           | Zbtb4         | INSIDE                 | 0.334                                                        | 0.685                          | 1333.10            | 913.29             | 0.229                          | 1059.80            | 242.41             |
| A_68_P28050582 | chr11:97301345-97301389                           | ENSMUST00000152933:3768 |               | INSIDE                 | 0.334                                                        | 4.109                          | 3066.02            | 12598.36           | 1.371                          | 1895.49            | 2598.70            |
| A_68_P29613712 | chr14:55305381-55305425                           | NM_001085473:366        | Acin1         | INSIDE                 | 0.333                                                        | 0.693                          | 1185.67            | 821.88             | 0.231                          | 961.80             | 222.15             |
| A_68_P21761657 | chr2:154483014-154483064                          | NM_029362:277           | Chmp4b        | INSIDE                 | 0.333                                                        | 0.640                          | 875.11             | 559.96             | 0.213                          | 680.46             | 145.10             |
| A_68_P28332514 | chr12:32339519-32339563                           | NM_028002:151           | Dus4l         | INSIDE                 | 0.333                                                        | 0.443                          | 1334.63            | 591.46             | 0.148                          | 1132.44            | 167.14             |
| A_68_P22318558 | chr3:89124366-89124410                            | NM_010108:2413          | Efn3          | INSIDE                 | 0.333                                                        | 1.492                          | 4248.51            | 6336.96            | 0.496                          | 3141.81            | 1559.10            |
| A_68_P25997733 | chr8:82581462-82581506                            | NM_020259:423           | Hhip          | INSIDE                 | 0.333                                                        | 0.541                          | 1886.99            | 1021.05            | 0.180                          | 1655.06            | 298.20             |
| A_68_P21339320 | chr2:74588185-74588229                            | NM_010468:38157         | Hoxd3         | DOWNSTREAM             | 0.333                                                        | 0.619                          | 903.43             | 559.59             | 0.207                          | 627.49             | 129.62             |
| A_68_P26674977 | chr9:81526156-81526200                            | NM_010482:-19           | Htr1b         | PROMOTER               | 0.333                                                        | 0.609                          | 1347.49            | 821.18             | 0.203                          | 987.29             | 200.17             |
| A_68_P30290896 | chr15:66117380-66117424                           | NM_152923:384           | Kenq3         | INSIDE                 | 0.333                                                        | 0.417                          | 2616.11            | 1091.34            | 0.139                          | 1995.45            | 277.20             |
| A_68_P29694908 | chr14:69809045-69809089                           | NM_010921:318           | Nkx3-1        | INSIDE                 | 0.333                                                        | 0.617                          | 1285.66            | 793.18             | 0.206                          | 1005.25            | 206.76             |
| A_68_P23294683 | chr4:128736055-128736099                          | NM_029219:562           | Rnf19b        | INSIDE                 | 0.333                                                        | 0.527                          | 1567.38            | 825.96             | 0.176                          | 1141.09            | 200.34             |
| A_68_P30670710 | chr16:35542481-35542525                           | NM_013661:1055          | Sema5b        | INSIDE                 | 0.333                                                        | 0.693                          | 1104.16            | 765.26             | 0.231                          | 916.15             | 211.69             |
| A_68_P30979305 | chr16:94083673-94083718                           | NM_011377:-1809         | Sim2          | PROMOTER               | 0.333                                                        | 0.645                          | 851.23             | 549.43             | 0.215                          | 704.95             | 151.40             |
| A_68_P28159866 | chr11:116395212-116395256                         | NM_011451:-819          | Sphk1         | PROMOTER               | 0.333                                                        | 0.717                          | 1422.35            | 1020.19            | 0.239                          | 1032.44            | 246.66             |
| A_68_P23297755 | chr4:129318416-129318460                          | NM_001199695:-129       | Txlna         | PROMOTER               | 0.333                                                        | 0.698                          | 1677.30            | 1170.21            | 0.232                          | 1301.70            | 302.60             |
| A_68_P23591876 | chr5:34278835-34278879                            | NM_011914:51            | Whse2         | INSIDE                 | 0.333                                                        | 0.638                          | 1238.52            | 789.59             | 0.213                          | 1098.24            | 233.43             |
| A_68_P24973685 | chr7:13513884-13513935                            | NM_029809:1145          | 2310014L17Rik | INSIDE                 | 0.332                                                        | 1.825                          | 1243.46            | 2269.35            | 0.606                          | 918.27             | 556.08             |
| A_68_P23971890 | chr5:108863226-108863271                          | NM_007507:149           | Atp5k         | INSIDE                 | 0.332                                                        | 1.509                          | 3721.60            | 5614.14            | 0.501                          | 2764.16            | 1385.19            |
| A_68_P20561487 | chr1:122239035-122239079                          | NM_207233:1898          | C1ql2         | INSIDE                 | 0.332                                                        | 0.481                          | 1353.72            | 650.98             | 0.160                          | 984.99             | 157.15             |
| A_68_P21117007 | chr2:32567836-32567880                            | NM_130860:446           | Cdk9          | INSIDE                 | 0.332                                                        | 0.453                          | 2551.54            | 1156.85            | 0.151                          | 1980.24            | 298.43             |
| A_68_P22316449 | chr3:88754686-88754730                            | NM_001164533:-504       | Dap3          | PROMOTER               | 0.332                                                        | 0.575                          | 2457.68            | 1412.69            | 0.191                          | 2067.19            | 394.06             |
| A_68_P29330069 | chr13:112476100-112476144                         | NM_172593:-263          | Mier3         | PROMOTER               | 0.332                                                        | 0.706                          | 1932.94            | 1364.94            | 0.235                          | 1389.53            | 326.18             |
| A_68_P30424875 | chr15:89209486-89209530                           | NM_001013022:177        | Odf3b         | INSIDE                 | 0.332                                                        | 0.576                          | 1115.25            | 642.53             | 0.191                          | 902.01             | 172.46             |



| ProbeName      | Target position of probe on CpG island microarray | TargetID           | GeneSymbol    | CpG island Description | Ratio of relative methylation (TiO <sub>2</sub> -NP/Vehicle) | Sham group                     |                    |                    | TiO <sub>2</sub> -H group      |                    |                    |
|----------------|---------------------------------------------------|--------------------|---------------|------------------------|--------------------------------------------------------------|--------------------------------|--------------------|--------------------|--------------------------------|--------------------|--------------------|
|                |                                                   |                    |               |                        |                                                              | Relative methylation (Cy5/Cy3) | Cy3 signal (Input) | Cy5 signal (MeDIP) | Relative methylation (Cy5/Cy3) | Cy3 signal (Input) | Cy5 signal (MeDIP) |
| A_68_P24117365 | chr5:136165147-136165191                          | NM_008898:85       | Por           | INSIDE                 | 0.332                                                        | 0.379                          | 3793.96            | 1439.74            | 0.126                          | 2873.72            | 362.20             |
| A_68_P20632576 | chr1:136195378-136195427                          | NM_001144855:34103 | Ppfia4        | INSIDE                 | 0.332                                                        | 1.667                          | 1077.95            | 1797.29            | 0.554                          | 866.36             | 479.93             |
| A_68_P21630920 | chr2:130468079-130468124                          | NM_197945:438      | Prosapip1     | INSIDE                 | 0.332                                                        | 1.646                          | 1718.94            | 2829.56            | 0.546                          | 1116.46            | 609.97             |
| A_68_P26997165 | chr10:21879836-21879886                           | NM_009016:1446     | Raet1a        | INSIDE                 | 0.332                                                        | 0.691                          | 1210.19            | 835.66             | 0.230                          | 953.47             | 218.83             |
| A_68_P25506338 | chr7:134732367-134732411                          | NM_172281:177      | Rnf40         | INSIDE                 | 0.332                                                        | 0.539                          | 3684.14            | 1985.86            | 0.179                          | 2754.98            | 492.71             |
| A_68_P27673287 | chr11:29073384-29073428                           | NM_134034:500      | Smek2         | INSIDE                 | 0.332                                                        | 0.541                          | 2795.39            | 1511.34            | 0.180                          | 1975.10            | 354.87             |
| A_68_P31123427 | chr17:28758620-28758664                           | NM_016795:757      | Srpk1         | INSIDE                 | 0.332                                                        | 0.652                          | 2257.58            | 1471.67            | 0.217                          | 1739.13            | 376.59             |
| A_68_P31952189 | chr19:10763284-10763328                           | NM_181403:2        | Vps37c        | INSIDE                 | 0.332                                                        | 0.460                          | 1485.26            | 682.69             | 0.153                          | 1210.67            | 184.90             |
| A_68_P30342959 | chr15:75447008-75447052                           | NM_001044718:-84   | Zfp41         | PROMOTER               | 0.332                                                        | 0.545                          | 2116.98            | 1152.76            | 0.181                          | 1691.87            | 305.67             |
| A_68_P25029850 | chr7:30875471-30875515                            | NM_152814:37       | Zfp566        | INSIDE                 | 0.332                                                        | 0.561                          | 1419.16            | 795.82             | 0.186                          | 1058.68            | 196.97             |
| A_68_P24385317 | chr6:39823195-39823239                            |                    |               | Unknown                | 0.332                                                        | 0.496                          | 1570.25            | 779.16             | 0.165                          | 1189.38            | 195.85             |
| A_68_P28613111 | chr12:88288337-88288381                           | NM_173735:66       | 2310044G17Rik | INSIDE                 | 0.331                                                        | 0.515                          | 2181.83            | 1123.70            | 0.170                          | 1614.00            | 274.96             |
| A_68_P23562892 | chr5:28791826-28791870                            | NR_015562:-1675    | 9530036O11Rik | PROMOTER               | 0.331                                                        | 0.402                          | 1583.43            | 637.04             | 0.133                          | 1415.85            | 188.76             |
| A_68_P26888668 | chr9:122203107-122203151                          | NM_133979:364      | Ano10         | INSIDE                 | 0.331                                                        | 0.662                          | 988.54             | 654.43             | 0.219                          | 827.93             | 181.41             |
| A_68_P29234322 | chr13:95129157-95129201                           | NM_009680:264      | Ap3b1         | INSIDE                 | 0.331                                                        | 0.633                          | 2204.00            | 1395.02            | 0.210                          | 1681.11            | 352.45             |
| A_68_P28331589 | chr12:32183737-32183789                           | NM_134048:643      | Cbl11         | INSIDE                 | 0.331                                                        | 0.464                          | 1148.20            | 533.15             | 0.154                          | 969.88             | 149.27             |
| A_68_P23979846 | chr5:110877794-110877838                          | NM_001142642:-294  | Fbrs11        | PROMOTER               | 0.331                                                        | 0.624                          | 3872.09            | 2414.63            | 0.206                          | 2935.11            | 605.59             |
| A_68_P32152397 | chr19:47939957-47940001                           | NM_030051:-56      | Gsto2         | PROMOTER               | 0.331                                                        | 0.475                          | 1378.65            | 655.14             | 0.157                          | 998.53             | 156.94             |
| A_68_P22748787 | chr4:15076098-15076142                            | NM_178617:158      | Necab1        | INSIDE                 | 0.331                                                        | 0.639                          | 4194.84            | 2680.58            | 0.212                          | 3139.91            | 664.84             |
| A_68_P30655996 | chr16:33056959-33057003                           | NM_021338:381      | Rpl35a        | INSIDE                 | 0.331                                                        | 0.584                          | 1016.65            | 593.81             | 0.193                          | 742.77             | 143.60             |
| A_68_P24993674 | chr7:20094360-20094415                            | NM_025960:310      | Trappc6a      | INSIDE                 | 0.331                                                        | 0.575                          | 908.18             | 522.04             | 0.190                          | 633.11             | 120.39             |
| A_68_P32217657 | chr19:59240762-59240806                           | NM_009501:3735     | Vax1          | INSIDE                 | 0.331                                                        | 0.488                          | 1580.67            | 770.74             | 0.162                          | 1310.75            | 211.81             |
| A_68_P27086283 | chr10:40603268-40603315                           | NM_031877:-48      | Wasf1         | DIVERGENT_PROMOTER     | 0.331                                                        | 0.549                          | 1332.25            | 731.06             | 0.182                          | 1022.21            | 185.78             |
| A_68_P31939560 | chr19:7457601-7457645                             | NM_001033139:-106  | A1846148      | PROMOTER               | 0.330                                                        | 0.526                          | 1069.98            | 563.05             | 0.173                          | 900.28             | 156.12             |
| A_68_P27176098 | chr10:60149935-60149979                           | NM_023370:9282     | Cdh23         | INSIDE                 | 0.330                                                        | 0.642                          | 1312.10            | 842.19             | 0.212                          | 1070.71            | 226.74             |
| A_68_P28036768 | chr11:94981457-94981501                           | NM_010055:48       | Dlx3          | INSIDE                 | 0.330                                                        | 0.663                          | 6824.89            | 4524.71            | 0.219                          | 4438.31            | 970.14             |
| A_68_P20264182 | chr1:59538765-59538809                            | NM_008057:-204     | Fzd7          | PROMOTER               | 0.330                                                        | 0.652                          | 1126.55            | 735.04             | 0.215                          | 892.72             | 191.95             |
| A_68_P21129649 | chr2:34627324-34627368                            | NM_001163434:-263  | Hspa5         | PROMOTER               | 0.330                                                        | 0.648                          | 834.51             | 540.35             | 0.214                          | 726.60             | 155.31             |
| A_68_P20229133 | chr1:52874369-52874413                            | NM_008384:142      | Inpp1         | INSIDE                 | 0.330                                                        | 0.522                          | 1016.33            | 530.28             | 0.172                          | 755.61             | 130.05             |
| A_68_P29372955 | chr13:120197789-120197833                         | NM_008710:8        | Nnt           | INSIDE                 | 0.330                                                        | 0.607                          | 2162.56            | 1313.26            | 0.201                          | 1778.37            | 356.82             |
| A_68_P26079047 | chr8:97219704-97219748                            | NM_026385:416      | Pllp          | INSIDE                 | 0.330                                                        | 0.562                          | 2488.97            | 1399.13            | 0.186                          | 1934.41            | 359.31             |
| A_68_P31830207 | chr18:74367434-74367478                           | NM_001164355:16    | Ska1          | INSIDE                 | 0.330                                                        | 0.675                          | 1542.09            | 1040.85            | 0.223                          | 1152.40            | 256.59             |
| A_68_P29517799 | chr14:33276809-33276853                           | NM_021712:1206     | Stc18a3       | INSIDE                 | 0.330                                                        | 0.644                          | 1387.88            | 893.81             | 0.212                          | 1161.94            | 246.74             |
| A_68_P32239401 | chrX:7215812-7215857                              | NM_009305:129      | Syp           | INSIDE                 | 0.330                                                        | 1.564                          | 3404.39            | 5325.71            | 0.517                          | 1357.55            | 701.23             |
| A_68_P29189772 | chr13:84361804-84361848                           | NM_175187:-74      | Tmem161b      | PROMOTER               | 0.330                                                        | 0.647                          | 2401.18            | 1552.43            | 0.213                          | 1935.16            | 412.29             |
| A_68_P29157708 | chr13:77274951-77274995                           | NM_001081353:176   | 2210408I21Rik | INSIDE                 | 0.329                                                        | 0.475                          | 1619.18            | 769.42             | 0.156                          | 1366.62            | 213.73             |
| A_68_P29480020 | chr14:26662064-26662110                           | NM_013469:446      | Anxa11        | INSIDE                 | 0.329                                                        | 0.534                          | 1751.87            | 934.91             | 0.176                          | 1452.69            | 255.29             |
| A_68_P21334162 | chr2:73730864-73730908                            | NM_001025093:-201  | Atf2          | PROMOTER               | 0.329                                                        | 0.595                          | 1886.52            | 1122.96            | 0.196                          | 1416.68            | 277.07             |
| A_68_P24800932 | chr6:120866913-120866957                          | NM_007544:-96      | Bid           | PROMOTER               | 0.329                                                        | 0.520                          | 1901.47            | 988.02             | 0.171                          | 1443.08            | 246.66             |
| A_68_P25594358 | chr7:149573933-149573977                          | NM_009983:-179     | Ctsd          | PROMOTER               | 0.329                                                        | 0.444                          | 1208.99            | 536.50             | 0.146                          | 972.25             | 141.86             |
| A_68_P21601160 | chr2:125073182-125073226                          | NM_023595:-46      | Dut           | PROMOTER               | 0.329                                                        | 0.733                          | 4470.05            | 3276.61            | 0.241                          | 3542.84            | 855.05             |
| A_68_P28158435 | chr11:116142974-116143018                         | NM_010254:744      | Galr2         | INSIDE                 | 0.329                                                        | 0.538                          | 3090.76            | 1662.50            | 0.177                          | 2339.73            | 414.36             |
| A_68_P28185092 | chr11:120392138-120392182                         | NM_008101:120      | Gegr          | INSIDE                 | 0.329                                                        | 0.476                          | 2115.77            | 1007.90            | 0.157                          | 1706.84            | 267.17             |
| A_68_P24226572 | chr6:8459387-8459431                              | NM_133236:-187     | Glied1        | PROMOTER               | 0.329                                                        | 0.407                          | 1976.94            | 804.00             | 0.134                          | 1662.49            | 222.59             |
| A_68_P29569518 | chr14:45840204-45840248                           | NM_027518:835      | Gpr137c       | INSIDE                 | 0.329                                                        | 0.680                          | 1405.75            | 955.29             | 0.224                          | 1019.18            | 227.96             |
| A_68_P24589794 | chr6:82723294-82723338                            | NM_013820:1132     | Hk2           | INSIDE                 | 0.329                                                        | 0.638                          | 1871.92            | 1194.40            | 0.210                          | 1528.37            | 321.29             |
| A_68_P24449036 | chr6:52153762-52153806                            | NM_010453:802      | Hoxa5         | INSIDE                 | 0.329                                                        | 0.520                          | 1406.56            | 730.98             | 0.171                          | 1068.76            | 182.49             |
| A_68_P28104645 | chr11:106861028-106861074                         | NM_010655:-211     | Kpna2         | PROMOTER               | 0.329                                                        | 0.625                          | 924.17             | 577.41             | 0.205                          | 751.86             | 154.49             |
| A_68_P31926078 | chr19:4962474-4962518                             | NM_025553:191      | Mrp111        | INSIDE                 | 0.329                                                        | 0.617                          | 1433.26            | 883.99             | 0.203                          | 1195.39            | 242.70             |
| A_68_P27271611 | chr10:77471981-77472025                           | NM_008826:539      | Pfkl          | INSIDE                 | 0.329                                                        | 0.529                          | 1010.60            | 534.75             | 0.174                          | 660.99             | 114.95             |
| A_68_P27993894 | chr11:87171685-87171729                           | NM_177167:790      | Ppm1c         | INSIDE                 | 0.329                                                        | 0.528                          | 3696.59            | 1953.44            | 0.174                          | 2917.15            | 507.29             |

| ProbeName      | Target position of probe on CpG island microarray | TargetID           | GeneSymbol    | CpG island Description | Ratio of relative methylation (TiO <sub>2</sub> -NP/Vehicle) | Sham group                     |                    |                    | TiO <sub>2</sub> -H group      |                    |                    |
|----------------|---------------------------------------------------|--------------------|---------------|------------------------|--------------------------------------------------------------|--------------------------------|--------------------|--------------------|--------------------------------|--------------------|--------------------|
|                |                                                   |                    |               |                        |                                                              | Relative methylation (Cy5/Cy3) | Cy3 signal (Input) | Cy5 signal (MeDIP) | Relative methylation (Cy5/Cy3) | Cy3 signal (Input) | Cy5 signal (MeDIP) |
| A_68_P28074045 | chr11:101329337-101329381                         | NM_009708:-293     | Rnd2          | DIVERGENT_PROMOTER     | 0.329                                                        | 0.513                          | 1295.32            | 664.66             | 0.169                          | 1087.51            | 183.31             |
| A_68_P27165500 | chr10:58275328-58275372                           | NM_172788:-756     | Sh3rf3        | PROMOTER               | 0.329                                                        | 0.424                          | 1488.26            | 630.44             | 0.140                          | 1073.55            | 149.81             |
| A_68_P31929160 | chr19:5510818-5510862                             | NM_001024560:-351  | Snx32         | PROMOTER               | 0.329                                                        | 1.631                          | 6529.73            | 10647.34           | 0.537                          | 4546.26            | 2442.33            |
| A_68_P23328077 | chr4:134908288-134908332                          | NM_001130477:819   | Srrm1         | INSIDE                 | 0.329                                                        | 0.459                          | 2385.61            | 1096.13            | 0.151                          | 1846.87            | 279.42             |
| A_68_P22411407 | chr3:108029536-108029580                          | NM_008596:-41      | Sypl2         | PROMOTER               | 0.329                                                        | 0.624                          | 909.47             | 567.79             | 0.206                          | 664.03             | 136.49             |
| A_68_P27780098 | chr11:48630599-48630643                           | NM_145377:273      | Trim41        | INSIDE                 | 0.329                                                        | 0.491                          | 1747.72            | 857.96             | 0.161                          | 1283.11            | 207.09             |
| A_68_P23756354 | chr5:65826840-65826884                            | NM_009466:219      | Ugdh          | INSIDE                 | 0.329                                                        | 0.477                          | 1619.17            | 772.85             | 0.157                          | 1266.07            | 199.08             |
| A_68_P24135897 | chr5:139960495-139960539                          | NM_001159908:-71   | Zfand2a       | PROMOTER               | 0.329                                                        | 0.677                          | 1149.23            | 777.68             | 0.223                          | 972.75             | 216.67             |
| A_68_P23417006 | chr4:151552589-151552633                          | NM_001146057:-7632 | Acot7         | PROMOTER               | 0.328                                                        | 0.435                          | 1700.38            | 738.82             | 0.143                          | 1283.70            | 183.01             |
| A_68_P25352110 | chr7:104886718-104886762                          | NM_175105:17       | Aqp11         | INSIDE                 | 0.328                                                        | 0.687                          | 3990.52            | 2741.02            | 0.226                          | 3126.19            | 705.20             |
| A_68_P24735111 | chr6:108610435-108610479                          | NM_011498:-166     | Bhlhe40       | PROMOTER               | 0.328                                                        | 0.495                          | 1175.97            | 581.53             | 0.162                          | 957.28             | 155.05             |
| A_68_P31764313 | chr18:62708319-62708363                           | NM_134136:57       | Fbxo38        | INSIDE                 | 0.328                                                        | 0.651                          | 1387.03            | 902.87             | 0.214                          | 988.00             | 211.00             |
| A_68_P21071306 | chr2:25166855-25166901                            | NM_001177656:7805  | Grin1         | INSIDE                 | 0.328                                                        | 0.573                          | 1554.63            | 890.80             | 0.188                          | 1255.65            | 236.24             |
| A_68_P23416912 | chr4:151533736-151533780                          | NM_008236:783      | Hes2          | INSIDE                 | 0.328                                                        | 0.644                          | 2289.50            | 1473.88            | 0.211                          | 1490.45            | 314.73             |
| A_68_P25092713 | chr7:52625245-52625289                            | NM_011698:668      | Lin7b         | INSIDE                 | 0.328                                                        | 0.646                          | 1494.01            | 964.68             | 0.212                          | 1244.88            | 264.01             |
| A_68_P28032108 | chr11:94182771-94182815                           | NM_026313:433      | Luc7l3        | INSIDE                 | 0.328                                                        | 1.743                          | 7729.97            | 13474.87           | 0.571                          | 492.05             | 2736.04            |
| A_68_P30127810 | chr15:34236528-34236572                           | NM_016762:115      | Matn2         | INSIDE                 | 0.328                                                        | 0.640                          | 2207.22            | 1411.80            | 0.210                          | 1655.60            | 346.92             |
| A_68_P20156457 | chr1:37947122-37947166                            | NM_026913:112      | Mitf1         | INSIDE                 | 0.328                                                        | 0.498                          | 1063.49            | 529.09             | 0.163                          | 719.51             | 117.41             |
| A_68_P20185544 | chr1:42908420-42908464                            | NM_023514:365      | Mrps9         | INSIDE                 | 0.328                                                        | 0.678                          | 1127.31            | 763.76             | 0.222                          | 885.66             | 196.52             |
| A_68_P31934664 | chr19:6428736-6428780                             | NM_001205234:10021 | Nrxn2         | INSIDE                 | 0.328                                                        | 0.603                          | 1095.93            | 660.62             | 0.198                          | 815.98             | 161.49             |
| A_68_P21350016 | chr2:76244453-76244497                            | NM_145525:-120     | Osbpl6        | PROMOTER               | 0.328                                                        | 0.405                          | 1936.43            | 783.94             | 0.133                          | 1603.37            | 213.03             |
| A_68_P31923508 | chr19:4510485-4510529                             | NM_001162946:35    | Pex           | INSIDE                 | 0.328                                                        | 0.570                          | 1057.80            | 603.33             | 0.187                          | 953.77             | 178.46             |
| A_68_P30652430 | chr16:32431382-32431427                           | NM_001163160:89    | Pcytl1a       | INSIDE                 | 0.328                                                        | 0.516                          | 1340.09            | 691.10             | 0.169                          | 1008.66            | 170.45             |
| A_68_P24293210 | chr6:22825825-22825869                            | NM_001081306:345   | Ptprr1        | INSIDE                 | 0.328                                                        | 0.540                          | 1458.38            | 787.56             | 0.177                          | 1115.51            | 197.31             |
| A_68_P30575819 | chr16:17807668-17807712                           | NM_153790:10316    | Scarf2        | INSIDE                 | 0.328                                                        | 0.515                          | 3124.31            | 1609.55            | 0.169                          | 2519.47            | 425.42             |
| A_68_P27915802 | chr11:73012820-73012864                           | NM_029031:-141     | Shpk          | DIVERGENT_PROMOTER     | 0.328                                                        | 0.550                          | 1385.83            | 762.72             | 0.180                          | 1062.94            | 191.67             |
| A_68_P23668849 | chr5:48375003-48375047                            | NM_178804:631      | Slit2         | INSIDE                 | 0.328                                                        | 0.737                          | 2370.43            | 1748.07            | 0.242                          | 1695.31            | 409.93             |
| A_68_P20625944 | chr1:135060292-135060341                          | Unknown            | Unknown       | Unknown                | 0.328                                                        | 0.625                          | 1139.43            | 712.71             | 0.205                          | 992.46             | 203.85             |
| A_68_P21070791 | chr2:25096537-25096581                            | NM_026415:-1141    | 2310002J15Rik | DIVERGENT_PROMOTER     | 0.327                                                        | 0.621                          | 1681.19            | 1044.39            | 0.203                          | 1276.40            | 259.49             |
| A_68_P24449864 | chr6:52264164-52264215                            | NR_038163:637      | 5730457N03Rik | INSIDE                 | 0.327                                                        | 0.527                          | 1015.98            | 535.84             | 0.173                          | 706.77             | 122.05             |
| A_68_P23364698 | chr4:141102196-141102247                          | NR_030695:145      | B330016D10Rik | INSIDE                 | 0.327                                                        | 0.686                          | 1102.77            | 757.05             | 0.224                          | 841.11             | 188.80             |
| A_68_P27275483 | chr10:78215546-78215590                           | NM_027630:244      | Ccdc105       | INSIDE                 | 0.327                                                        | 0.515                          | 1222.98            | 630.21             | 0.168                          | 988.39             | 166.34             |
| A_68_P21715592 | chr2:145760196-145760240                          | NM_025820:218      | Crmk1         | INSIDE                 | 0.327                                                        | 0.435                          | 1660.27            | 722.48             | 0.142                          | 1238.30            | 176.21             |
| A_68_P27288000 | chr10:80652951-80652995                           | NM_007828:6310     | Dapk3         | INSIDE                 | 0.327                                                        | 1.782                          | 1669.49            | 2975.08            | 0.583                          | 1158.49            | 674.86             |
| A_68_P21113205 | chr2:31938737-31938781                            | NM_175511:467      | Fam78a        | INSIDE                 | 0.327                                                        | 0.594                          | 2244.07            | 1333.68            | 0.194                          | 1629.12            | 316.59             |
| A_68_P31121750 | chr17:28450482-28450526                           | NM_001163819:30    | Fance         | INSIDE                 | 0.327                                                        | 0.719                          | 1777.05            | 1277.97            | 0.235                          | 1349.73            | 317.35             |
| A_68_P23917033 | chr5:98683430-98683474                            | NM_010203:250      | Fgf5          | INSIDE                 | 0.327                                                        | 0.615                          | 1605.45            | 987.03             | 0.201                          | 1412.65            | 283.62             |
| A_68_P23999715 | chr5:114185534-114185578                          | NM_001010825:-234  | Ficd          | PROMOTER               | 0.327                                                        | 0.464                          | 2132.62            | 988.98             | 0.152                          | 1495.81            | 226.98             |
| A_68_P30925866 | chr16:84835027-84835071                           | NM_008065:-320     | Gabpa         | PROMOTER               | 0.327                                                        | 0.631                          | 3756.39            | 2371.05            | 0.206                          | 2791.11            | 575.64             |
| A_68_P29660137 | chr14:63870430-63870474                           | NM_008092:-6355    | Gata4         | PROMOTER               | 0.327                                                        | 0.660                          | 2536.61            | 1675.09            | 0.216                          | 1862.65            | 402.08             |
| A_68_P23576909 | chr5:31481980-31482025                            | NM_027901:515      | Gtf3e2        | INSIDE                 | 0.327                                                        | 0.613                          | 948.93             | 581.83             | 0.201                          | 714.94             | 143.48             |
| A_68_P30634660 | chr16:29210031-29210075                           | NM_013751:272      | Hrasls        | INSIDE                 | 0.327                                                        | 2.119                          | 4365.10            | 9249.79            | 0.692                          | 3160.65            | 2188.69            |
| A_68_P22311640 | chr3:87886128-87886172                            | NM_001033484:178   | Iqgap3        | INSIDE                 | 0.327                                                        | 0.640                          | 1080.27            | 691.66             | 0.209                          | 843.99             | 176.78             |
| A_68_P29508895 | chr14:31764856-31764900                           | NM_011849:205      | Nek4          | INSIDE                 | 0.327                                                        | 0.545                          | 1412.27            | 769.22             | 0.178                          | 1179.76            | 209.82             |
| A_68_P25948236 | chr8:72356467-72356516                            | NM_001024954:-111  | Pbx4          | PROMOTER               | 0.327                                                        | 0.419                          | 1294.35            | 542.72             | 0.137                          | 1029.47            | 141.14             |
| A_68_P21580771 | chr2:121240143-121240187                          | NM_007952:527      | Pdia3         | INSIDE                 | 0.327                                                        | 0.376                          | 2675.08            | 1004.86            | 0.123                          | 2061.48            | 253.29             |
| A_68_P21706810 | chr2:144194546-144194590                          | NM_001164813:-150  | Pet117        | PROMOTER               | 0.327                                                        | 0.472                          | 1145.94            | 541.12             | 0.155                          | 963.15             | 148.85             |
| A_68_P31108117 | chr17:26204538-26204582                           | NM_001162868:1562  | Rab11fip3     | INSIDE                 | 0.327                                                        | 0.619                          | 1921.83            | 1189.49            | 0.203                          | 1359.32            | 275.42             |
| A_68_P32203265 | chr19:56896867-56896911                           | NM_001002238:-3810 | Tdrl1         | DIVERGENT_PROMOTER     | 0.327                                                        | 0.652                          | 2194.29            | 1431.00            | 0.214                          | 1674.06            | 357.47             |
| A_68_P26290457 | chr9:8004110-80041154                             | NM_001171147:464   | Yap1          | INSIDE                 | 0.327                                                        | 0.634                          | 3063.78            | 1942.36            | 0.207                          | 2456.14            | 508.50             |
| A_68_P20505868 | chr1:107886770-107886814                          | NM_001122675:-190  | Zcche2        | PROMOTER               | 0.327                                                        | 0.533                          | 1625.06            | 865.63             | 0.174                          | 1208.30            | 210.16             |

| ProbeName      | Target position of probe on CpG island microarray | TargetID            | GeneSymbol    | CpG island Description | Ratio of relative methylation (TiO <sub>2</sub> -NP/Vehicle) | Sham group                     |                    |                    | TiO <sub>2</sub> -H group      |                    |                    |
|----------------|---------------------------------------------------|---------------------|---------------|------------------------|--------------------------------------------------------------|--------------------------------|--------------------|--------------------|--------------------------------|--------------------|--------------------|
|                |                                                   |                     |               |                        |                                                              | Relative methylation (Cy5/Cy3) | Cy3 signal (Input) | Cy5 signal (MeDIP) | Relative methylation (Cy5/Cy3) | Cy3 signal (Input) | Cy5 signal (MeDIP) |
| A_68_P26568895 | chr9:61969849-61969894                            | mmu-mir-5133:530    |               | DOWNSTREAM             | 0.327                                                        | 1.476                          | 2048.18            | 3023.30            | 0.482                          | 1436.89            | 692.68             |
| A_68_P26888673 | chr9:122203754-122203798                          | NM_133979:~284      | Ano10         | PROMOTER               | 0.326                                                        | 1.412                          | 6995.73            | 9875.00            | 0.460                          | 4283.64            | 1970.44            |
| A_68_P26797104 | chr9:105297728-105297772                          | NM_001164828~-5367  | Aste1         | PROMOTER               | 0.326                                                        | 0.267                          | 2822.70            | 753.01             | 0.087                          | 2039.80            | 177.66             |
| A_68_P24800510 | chr6:120786535-120786579                          | NM_153516:309       | Bel2l13       | INSIDE                 | 0.326                                                        | 0.375                          | 2013.72            | 755.91             | 0.122                          | 1678.70            | 205.41             |
| A_68_P27533698 | chr10:126486217-126486263                         | NM_010009:939       | Cyp27b1       | INSIDE                 | 0.326                                                        | 0.365                          | 1690.55            | 617.35             | 0.119                          | 1110.02            | 132.01             |
| A_68_P23222366 | chr4:114598399-114598443                          | NM_015758:198       | Foxe3         | INSIDE                 | 0.326                                                        | 0.370                          | 2556.91            | 946.80             | 0.121                          | 2042.06            | 246.38             |
| A_68_P26134292 | chr8:108042458-108042502                          | NM_008289~-165      | Hsd11b2       | PROMOTER               | 0.326                                                        | 0.425                          | 1518.41            | 646.07             | 0.139                          | 1128.21            | 156.61             |
| A_68_P25965612 | chr8:75877517-75877561                            | NM_010687~-1083     | Large         | PROMOTER               | 0.326                                                        | 0.325                          | 2752.12            | 893.29             | 0.106                          | 1869.82            | 197.79             |
| A_68_P25848476 | chr8:49641034-49641078                            | NM_001145937:118988 | Odz3          | INSIDE                 | 0.326                                                        | 1.385                          | 4524.73            | 6265.24            | 0.452                          | 3103.08            | 1401.44            |
| A_68_P25173477 | chr7:70902398-70902442                            | NM_130880:312763    | Otud7a        | INSIDE                 | 0.326                                                        | 0.460                          | 1275.32            | 586.99             | 0.150                          | 1055.58            | 158.56             |
| A_68_P22652203 | chr3:152377356-152377400                          | NM_025662:315       | Pigk          | INSIDE                 | 0.326                                                        | 0.501                          | 1096.58            | 549.24             | 0.163                          | 905.32             | 147.86             |
| A_68_P25589079 | chr7:148660855-148660899                          | NM_025593:176       | Polr2l        | INSIDE                 | 0.326                                                        | 1.338                          | 11219.53           | 15007.40           | 0.436                          | 8052.58            | 3511.85            |
| A_68_P21871015 | chr2:173485606-173485650                          | NM_024436:283       | Rab22a        | INSIDE                 | 0.326                                                        | 0.522                          | 1322.49            | 689.96             | 0.170                          | 1079.65            | 183.49             |
| A_68_P22449707 | chr3:116211186-116211230                          | NM_025517~-115      | Rted1         | DIVERGENT_PROMOTER     | 0.326                                                        | 0.545                          | 1821.44            | 993.37             | 0.178                          | 1535.89            | 273.01             |
| A_68_P24325499 | chr6:29222771-29222816                            | NM_023516:168       | 2310016C08Rik | INSIDE                 | 0.325                                                        | 0.492                          | 1529.09            | 752.07             | 0.160                          | 1159.55            | 185.56             |
| A_68_P26397638 | chr9:30729092-30729141                            | NM_001024139:921    | Adams15       | INSIDE                 | 0.325                                                        | 0.630                          | 1640.84            | 1034.07            | 0.205                          | 1173.36            | 240.07             |
| A_68_P27143033 | chr10:53316773-53316825                           | NM_025541:32        | Asf1a         | INSIDE                 | 0.325                                                        | 0.576                          | 1402.87            | 808.05             | 0.187                          | 1079.97            | 202.03             |
| A_68_P20936667 | chr1:193007287-193007331                          | NM_007498:~96       | Atf3          | PROMOTER               | 0.325                                                        | 0.558                          | 3284.36            | 1832.38            | 0.182                          | 2456.72            | 446.10             |
| A_68_P25007802 | chr7:25790777-25790821                            | NM_144921:116       | Atp1a3        | INSIDE                 | 0.325                                                        | 0.643                          | 1282.34            | 824.20             | 0.209                          | 1114.82            | 232.54             |
| A_68_P20600402 | chr1:130313507-130313551                          | NM_177445:465       | Dars          | INSIDE                 | 0.325                                                        | 0.686                          | 1909.72            | 1310.50            | 0.223                          | 1426.18            | 317.99             |
| A_68_P21320135 | chr2:71384020-71384064                            | NM_010054:769       | Dlx2          | INSIDE                 | 0.325                                                        | 0.585                          | 2056.74            | 1203.82            | 0.190                          | 1438.81            | 273.76             |
| A_68_P26344425 | chr9:20702979-20703023                            | NM_016876:34        | Ei3g          | INSIDE                 | 0.325                                                        | 0.497                          | 2891.30            | 1437.01            | 0.162                          | 2273.68            | 367.67             |
| A_68_P21874766 | chr2:174156274-174156318                          | NM_001077510:707    | Gnas          | INSIDE                 | 0.325                                                        | 0.643                          | 1812.77            | 1166.24            | 0.209                          | 1502.48            | 313.93             |
| A_68_P21331225 | chr2:73224765-73224809                            | NM_001190297~-331   | Gpr155        | PROMOTER               | 0.325                                                        | 0.588                          | 2712.39            | 1594.02            | 0.191                          | 2026.63            | 386.67             |
| A_68_P28614428 | chr12:88487974-88488018                           | NM_010363~-671      | Gstz1         | PROMOTER               | 0.325                                                        | 0.678                          | 2336.86            | 1583.57            | 0.220                          | 1908.15            | 420.14             |
| A_68_P25502653 | chr7:134005799-134005843                          | NM_172746:335       | Hirip3        | INSIDE                 | 0.325                                                        | 0.426                          | 1549.80            | 659.52             | 0.138                          | 1328.85            | 183.58             |
| A_68_P26809753 | chr9:107489861-107489907                          | NM_025903~-164      | Ifrd2         | PROMOTER               | 0.325                                                        | 0.636                          | 3494.17            | 2221.47            | 0.207                          | 2465.15            | 509.70             |
| A_68_P21147673 | chr2:38210263-38210314                            | NM_010710:3459      | Lhx2          | INSIDE                 | 0.325                                                        | 0.537                          | 2109.82            | 1133.30            | 0.174                          | 1665.38            | 290.44             |
| A_68_P22951805 | chr4:58566279-58566323                            | NM_172989~-135      | Lpar1         | PROMOTER               | 0.325                                                        | 0.581                          | 1485.20            | 862.66             | 0.189                          | 1231.58            | 232.16             |
| A_68_P29348449 | chr13:115608614-115608659                         | NM_001113374:192    | Mocs2         | INSIDE                 | 0.325                                                        | 0.651                          | 973.07             | 633.63             | 0.211                          | 793.11             | 167.72             |
| A_68_P25578887 | chr7:146767017-146767061                          | NR_027857:1658      | Nkx6-2        | INSIDE                 | 0.325                                                        | 0.674                          | 1031.65            | 695.50             | 0.219                          | 841.23             | 184.36             |
| A_68_P21102303 | chr2:30142233-30142277                            | NM_198304:302       | Nup188        | INSIDE                 | 0.325                                                        | 0.431                          | 2753.10            | 1187.89            | 0.140                          | 2026.23            | 284.10             |
| A_68_P27840802 | chr11:59919053-59919097                           | NM_009021:560       | Rai1          | INSIDE                 | 0.325                                                        | 0.609                          | 4194.73            | 2555.13            | 0.198                          | 3321.06            | 658.23             |
| A_68_P22207866 | chr3:66782104-66782148                            | NM_013665:3567      | Shox2         | INSIDE                 | 0.325                                                        | 0.738                          | 3000.19            | 2215.07            | 0.240                          | 2068.51            | 496.71             |
| A_68_P30999921 | chr16:97832578-97832622                           | NM_015775:202       | Tmprss2       | INSIDE                 | 0.325                                                        | 0.387                          | 1770.06            | 685.77             | 0.126                          | 1448.29            | 182.21             |
| A_68_P23594730 | chr5:34856051-34856097                            | NM_139064:554       | Tnfp2         | INSIDE                 | 0.325                                                        | 1.737                          | 1122.27            | 1949.46            | 0.565                          | 867.02             | 490.08             |
| A_68_P27780212 | chr11:48650835-48650879                           | NM_053166:11217     | Trim7         | INSIDE                 | 0.325                                                        | 0.690                          | 1523.39            | 1050.85            | 0.224                          | 1105.36            | 247.47             |
| A_68_P24287930 | chr6:21801755-21801799                            | NM_173007:739       | Tspan12       | INSIDE                 | 0.325                                                        | 0.579                          | 2836.66            | 1641.35            | 0.188                          | 2156.87            | 406.19             |
| A_68_P28332516 | chr12:32339734-32339779                           | NM_001163126:23     | Cog5          | INSIDE                 | 0.324                                                        | 0.516                          | 1819.70            | 938.79             | 0.167                          | 1454.03            | 243.41             |
| A_68_P28737540 | chr12:111516152-111516199                         | NR_002866:103       | Dio3os        | INSIDE                 | 0.324                                                        | 0.378                          | 1660.43            | 627.60             | 0.122                          | 1385.18            | 169.57             |
| A_68_P27928209 | chr11:75609329-75609373                           | NM_007873:209       | Doc2b         | INSIDE                 | 0.324                                                        | 0.409                          | 2502.99            | 1024.49            | 0.132                          | 1958.78            | 259.37             |
| A_68_P28863232 | chr13:19711147-19711191                           | NM_134065:531       | Epdr1         | INSIDE                 | 0.324                                                        | 0.475                          | 1194.76            | 568.01             | 0.154                          | 934.33             | 143.87             |
| A_68_P30089764 | chr15:26824671-26824715                           | NM_176959:627       | Fbx17         | INSIDE                 | 0.324                                                        | 0.629                          | 2508.25            | 1578.89            | 0.204                          | 1946.34            | 397.18             |
| A_68_P23331228 | chr4:135476820-135476864                          | NM_024243:202       | Fuca1         | INSIDE                 | 0.324                                                        | 0.616                          | 1569.76            | 967.72             | 0.200                          | 1295.05            | 258.75             |
| A_68_P27826626 | chr11:57458476-57458520                           | NM_134189~-445      | Galnt10       | PROMOTER               | 0.324                                                        | 0.668                          | 1176.19            | 786.21             | 0.217                          | 976.16             | 211.69             |
| A_68_P25952872 | chr8:73119238-73119282                            | NM_023627:881       | Isyna1        | INSIDE                 | 0.324                                                        | 1.460                          | 800.52             | 1168.77            | 0.473                          | 778.01             | 367.89             |
| A_68_P25954143 | chr8:73321298-73321342                            | NM_199308~-4988     | Mast3         | PROMOTER               | 0.324                                                        | 1.546                          | 3449.19            | 5331.35            | 0.501                          | 2349.00            | 1176.71            |
| A_68_P21761151 | chr2:154384393-154384437                          | NM_021546:175       | Necab3        | INSIDE                 | 0.324                                                        | 1.466                          | 1381.50            | 2025.28            | 0.475                          | 1131.57            | 537.67             |
| A_68_P21820025 | chr2:164659401-164659445                          | NM_001082974~-326   | Neur12        | PROMOTER               | 0.324                                                        | 0.551                          | 2199.28            | 1212.46            | 0.178                          | 1636.93            | 292.07             |
| A_68_P26823555 | chr9:110310525-110310569                          | NM_001081043:168    | Ptpn23        | INSIDE                 | 0.324                                                        | 0.428                          | 1786.44            | 765.15             | 0.139                          | 1351.38            | 187.53             |
| A_68_P26628305 | chr9:72379707-72379757                            | NM_001033536~-314   | Rfx7          | PROMOTER               | 0.324                                                        | 0.657                          | 823.83             | 540.96             | 0.213                          | 566.59             | 120.64             |

| ProbeName      | Target position of probe on CpG island microarray | TargetID           | GeneSymbol    | CpG island Description | Ratio of relative methylation (TiO <sub>2</sub> -NP/Vehicle) | Sham group                     |                    |                    | TiO <sub>2</sub> -H group      |                    |                    |
|----------------|---------------------------------------------------|--------------------|---------------|------------------------|--------------------------------------------------------------|--------------------------------|--------------------|--------------------|--------------------------------|--------------------|--------------------|
|                |                                                   |                    |               |                        |                                                              | Relative methylation (Cy5/Cy3) | Cy3 signal (Input) | Cy5 signal (MeDIP) | Relative methylation (Cy5/Cy3) | Cy3 signal (Input) | Cy5 signal (MeDIP) |
| A_68_P25408483 | chr7:116662453-116662497                          | NM_011975:-234     | Rpl27a        | PROMOTER               | 0.324                                                        | 0.709                          | 2713.74            | 1924.57            | 0.230                          | 1975.60            | 454.47             |
| A_68_P27830409 | chr11:58144073-58144117                           | NM_001161338:-125  | Sh3bp5l       | DIVERGENT_PROMOTER     | 0.324                                                        | 0.681                          | 1229.07            | 836.78             | 0.220                          | 858.93             | 189.18             |
| A_68_P28168283 | chr11:117829826-117829870                         | NM_007707:832      | Soes3         | INSIDE                 | 0.324                                                        | 0.656                          | 1019.69            | 668.44             | 0.212                          | 822.72             | 174.58             |
| A_68_P21749117 | chr2:152222565-152222609                          | NM_011438:1196     | Sox12         | INSIDE                 | 0.324                                                        | 0.582                          | 2264.60            | 1317.36            | 0.188                          | 1759.69            | 331.63             |
| A_68_P26504538 | chr9:50412116-50412160                            | NM_013897:133      | Timm8b        | INSIDE                 | 0.324                                                        | 0.599                          | 3069.78            | 1838.08            | 0.194                          | 2210.71            | 428.87             |
| A_68_P32742644 | chrX:147091720-147091764                          | NM_001002272:237   | Tro           | INSIDE                 | 0.324                                                        | 1.623                          | 1668.43            | 2707.75            | 0.526                          | 803.83             | 423.10             |
| A_68_P30084538 | chr15:25914029-25914073                           | NM_144523:-70      | Zfp622        | PROMOTER               | 0.324                                                        | 0.545                          | 2913.87            | 1587.63            | 0.177                          | 2220.02            | 392.50             |
| A_68_P24397786 | chr6:42300193-42300237                            | NM_011777:388      | Zyx           | INSIDE                 | 0.324                                                        | 0.509                          | 3123.25            | 1591.09            | 0.165                          | 2268.68            | 374.48             |
| A_68_P24385307 | chr6:39822258-39822302                            |                    |               | Unknown                | 0.324                                                        | 0.494                          | 1253.82            | 618.76             | 0.160                          | 1039.83            | 166.27             |
| A_68_P30931901 | chr16:85900910-85900966                           | NM_011782:432      | Adams5        | INSIDE                 | 0.323                                                        | 0.482                          | 1808.46            | 872.30             | 0.156                          | 1374.78            | 214.52             |
| A_68_P32202579 | chr19:56797245-56797289                           | NM_007419:405      | Adrb1         | INSIDE                 | 0.323                                                        | 0.619                          | 1423.99            | 880.90             | 0.200                          | 1004.83            | 200.82             |
| A_68_P23897552 | chr5:93473776-93473820                            | NM_175270:250      | Ankrd56       | INSIDE                 | 0.323                                                        | 0.413                          | 1290.56            | 532.86             | 0.133                          | 1022.51            | 136.49             |
| A_68_P23397203 | chr4:148265241-148265285                          | NM_027195:86762    | Cas2l         | INSIDE                 | 0.323                                                        | 0.745                          | 3039.69            | 2264.27            | 0.241                          | 2187.80            | 526.88             |
| A_68_P24934669 | chr6:147424894-147424938                          | NM_025911:524      | Ccdc91        | INSIDE                 | 0.323                                                        | 0.543                          | 1210.07            | 657.52             | 0.175                          | 1003.08            | 175.85             |
| A_68_P30778453 | chr16:55934660-55934704                           | NM_028815:279      | Cep97         | INSIDE                 | 0.323                                                        | 0.616                          | 1514.17            | 932.49             | 0.199                          | 1096.48            | 218.02             |
| A_68_P21425776 | chr2:91815643-91815687                            | NM_011957:48663    | Creb3l1       | DOWNSTREAM             | 0.323                                                        | 0.554                          | 1548.19            | 858.35             | 0.179                          | 1192.03            | 213.29             |
| A_68_P29446595 | chr14:21207859-21207903                           | NM_134081:252      | Dnajc9        | INSIDE                 | 0.323                                                        | 0.410                          | 2167.14            | 887.53             | 0.132                          | 1525.68            | 201.53             |
| A_68_P28865540 | chr13:20183015-20183059                           | NM_080288:661      | Elmo1         | INSIDE                 | 0.323                                                        | 0.557                          | 1580.09            | 880.66             | 0.180                          | 1222.61            | 220.38             |
| A_68_P26161392 | chr8:112741955-112741999                          | NM_146215:117      | Ftsjdl1       | INSIDE                 | 0.323                                                        | 0.714                          | 3057.34            | 2182.95            | 0.231                          | 2212.69            | 510.79             |
| A_68_P25949229 | chr8:72520506-72520550                            | NM_001113345:-250  | Gatad2a       | PROMOTER               | 0.323                                                        | 0.338                          | 3200.59            | 1082.52            | 0.109                          | 2626.20            | 286.70             |
| A_68_P23591967 | chr5:34326256-34326300                            | NM_001033458:156   | Gm1673        | INSIDE                 | 0.323                                                        | 0.440                          | 4056.81            | 1783.20            | 0.142                          | 3021.30            | 429.15             |
| A_68_P23134315 | chr4:97438906-97438950                            | NM_001122953:-5388 | Nfia          | PROMOTER               | 0.323                                                        | 0.625                          | 892.54             | 557.84             | 0.202                          | 796.05             | 160.61             |
| A_68_P22558744 | chr3:136333820-136333864                          | NM_008913:109      | Ppp3ca        | INSIDE                 | 0.323                                                        | 0.507                          | 1318.47            | 668.10             | 0.164                          | 975.43             | 159.85             |
| A_68_P25091295 | chr7:52384233-52384280                            | NM_009438:-151     | Rpl13a        | PROMOTER               | 0.323                                                        | 0.453                          | 1250.08            | 566.51             | 0.146                          | 818.09             | 119.58             |
| A_68_P26998899 | chr10:22365156-22365200                           | NM_178934:362      | Slc2a12       | INSIDE                 | 0.323                                                        | 0.737                          | 2954.87            | 2176.30            | 0.238                          | 2393.14            | 568.74             |
| A_68_P25576402 | chr7:146399285-146399329                          | NM_001162540:-100  | Stk32c        | PROMOTER               | 0.323                                                        | 0.472                          | 2110.43            | 995.44             | 0.152                          | 1549.76            | 236.26             |
| A_68_P29243708 | chr13:96731321-96731365                           | NM_029210:171190   | Sv2c          | INSIDE                 | 0.323                                                        | 0.541                          | 1120.33            | 605.63             | 0.175                          | 969.44             | 169.49             |
| A_68_P32488666 | chrX:78316434-78316478                            | NM_138751:474      | Tmem47        | INSIDE                 | 0.323                                                        | 1.684                          | 2769.27            | 4664.43            | 0.545                          | 987.39             | 537.79             |
| A_68_P24629444 | chr6:89594337-89594382                            | NM_001178058:378   | Txnrd3        | INSIDE                 | 0.323                                                        | 0.633                          | 850.49             | 538.49             | 0.205                          | 606.75             | 124.15             |
| A_68_P24938726 | chr6:148160773-148160817                          | NR_015615:-15      | 4732416N19Rik | PROMOTER               | 0.322                                                        | 0.722                          | 4696.46            | 3388.84            | 0.233                          | 3349.09            | 778.85             |
| A_68_P25471460 | chr7:128126217-128126263                          | NM_028955:218      | 4933427G17Rik | INSIDE                 | 0.322                                                        | 0.594                          | 1391.28            | 826.12             | 0.191                          | 1011.77            | 193.60             |
| A_68_P31145139 | chr17:32487576-32487622                           | NM_017476:-79      | Akap8l        | PROMOTER               | 0.322                                                        | 0.500                          | 1310.92            | 655.00             | 0.161                          | 954.49             | 153.79             |
| A_68_P27912780 | chr11:72503452-72503496                           | NM_009671:-29      | Ankfy1        | PROMOTER               | 0.322                                                        | 1.388                          | 2307.87            | 3202.55            | 0.447                          | 1454.93            | 649.83             |
| A_68_P25435069 | chr7:121398243-121398287                          | NM_033370:-70      | Copb1         | PROMOTER               | 0.322                                                        | 0.582                          | 1570.16            | 913.29             | 0.187                          | 1374.61            | 257.32             |
| A_68_P32242173 | chrX:7769712-7769759                              | NM_007898:903      | Ebp           | INSIDE                 | 0.322                                                        | 1.416                          | 1649.64            | 2336.36            | 0.456                          | 820.88             | 374.58             |
| A_68_P20332287 | chr1:71699659-71699703                            | NM_010233:65       | Fnl1          | INSIDE                 | 0.322                                                        | 0.637                          | 2362.01            | 1505.54            | 0.205                          | 1784.10            | 366.11             |
| A_68_P28703487 | chr12:105711415-105711459                         | NM_010351:10       | Gsc           | INSIDE                 | 0.322                                                        | 0.584                          | 988.58             | 576.92             | 0.188                          | 823.69             | 154.66             |
| A_68_P25957092 | chr8:74012930-74012974                            | NM_032544:951      | Gtpbp3        | INSIDE                 | 0.322                                                        | 0.566                          | 904.37             | 511.45             | 0.182                          | 668.64             | 121.76             |
| A_68_P27534887 | chr10:126700073-126700117                         | NM_001039000:325   | Kif5a         | INSIDE                 | 0.322                                                        | 0.635                          | 3511.08            | 2229.25            | 0.205                          | 2525.28            | 516.91             |
| A_68_P30350131 | chr15:76541158-76541202                           | NM_145471:11       | Lrrc14        | INSIDE                 | 0.322                                                        | 0.642                          | 2574.57            | 1652.84            | 0.207                          | 1800.54            | 372.39             |
| A_68_P31926004 | chr19:4942668-4942712                             | NM_172835:402      | Peli3         | INSIDE                 | 0.322                                                        | 0.727                          | 3180.37            | 2313.19            | 0.234                          | 2465.11            | 577.80             |
| A_68_P25308131 | chr7:96665783-96665827                            | NM_029614:292      | Prss23        | INSIDE                 | 0.322                                                        | 0.621                          | 1100.59            | 683.16             | 0.200                          | 944.67             | 188.58             |
| A_68_P30879835 | chr16:75593202-75593246                           | NM_198302:89       | Rbm11         | INSIDE                 | 0.322                                                        | 0.573                          | 1181.66            | 676.84             | 0.185                          | 981.41             | 181.14             |
| A_68_P28033654 | chr11:94410127-94410174                           | NM_001013381:371   | Rsad1         | INSIDE                 | 0.322                                                        | 0.576                          | 1069.18            | 615.52             | 0.186                          | 777.58             | 144.35             |
| A_68_P25504557 | chr7:134351496-134351540                          | NM_144522:464      | Tbc1d10b      | INSIDE                 | 0.322                                                        | 0.584                          | 1091.21            | 637.29             | 0.188                          | 691.62             | 130.07             |
| A_68_P23293635 | chr4:128561085-128561129                          | NM_178110:-277     | Trim62        | PROMOTER               | 0.322                                                        | 0.694                          | 1071.89            | 743.45             | 0.224                          | 794.08             | 177.50             |
| A_68_P29005200 | chr13:46059987-46060031                           | NM_009124:337      | Atxn1         | INSIDE                 | 0.321                                                        | 0.681                          | 2019.49            | 1376.26            | 0.219                          | 1592.59            | 348.06             |
| A_68_P23094686 | chr4:88922820-88922864                            | NM_001040654:5254  | Cdkn2a        | INSIDE                 | 0.321                                                        | 0.573                          | 1402.32            | 803.61             | 0.184                          | 1077.56            | 197.99             |
| A_68_P31919590 | chr19:3852379-3852423                             | NM_001025566:628   | Chka          | INSIDE                 | 0.321                                                        | 0.475                          | 1951.50            | 927.80             | 0.152                          | 1485.68            | 226.50             |
| A_68_P25089991 | chr7:52151549-52151593                            | NM_027376:122      | Fuz           | INSIDE                 | 0.321                                                        | 0.553                          | 1968.66            | 1087.93            | 0.177                          | 1562.48            | 277.33             |
| A_68_P29338084 | chr13:113784193-113784237                         | NM_001037914:139   | Gm6320        | INSIDE                 | 0.321                                                        | 0.575                          | 1394.98            | 801.53             | 0.185                          | 1268.59            | 234.19             |

| ProbeName      | Target position of probe on CpG island microarray | TargetID                | GeneSymbol    | CpG island Description | Ratio of relative methylation (TiO <sub>2</sub> -NP/Vehicle) | Sham group                     |                    |                    | TiO <sub>2</sub> -H group      |                    |                    |
|----------------|---------------------------------------------------|-------------------------|---------------|------------------------|--------------------------------------------------------------|--------------------------------|--------------------|--------------------|--------------------------------|--------------------|--------------------|
|                |                                                   |                         |               |                        |                                                              | Relative methylation (Cy5/Cy3) | Cy3 signal (Input) | Cy5 signal (MeDIP) | Relative methylation (Cy5/Cy3) | Cy3 signal (Input) | Cy5 signal (MeDIP) |
| A_68_P26546335 | chr9:58046426-58046470                            | NM_001161535:3074       | Islr2         | INSIDE                 | 0.321                                                        | 0.410                          | 1624.17            | 665.74             | 0.132                          | 1391.94            | 183.04             |
| A_68_P30964671 | chr16:91730311-91730355                           | NM_001110276:717        | Itsn1         | INSIDE                 | 0.321                                                        | 0.667                          | 3983.80            | 2655.88            | 0.214                          | 2907.28            | 621.89             |
| A_68_P23374709 | chr4:142939818-142939864                          | NM_001162983:188        | Lrrc38        | INSIDE                 | 0.321                                                        | 0.588                          | 916.58             | 538.54             | 0.188                          | 728.77             | 137.35             |
| A_68_P25279940 | chr7:90014576-90014620                            | NM_175366:-1244         | Mex3b         | PROMOTER               | 0.321                                                        | 0.602                          | 1372.26            | 826.29             | 0.193                          | 1055.62            | 203.99             |
| A_68_P27567706 | chr11:6191780-6191824                             | NM_010956:203           | Ogdh          | INSIDE                 | 0.321                                                        | 0.474                          | 2299.39            | 1088.84            | 0.152                          | 1778.73            | 270.62             |
| A_68_P23720370 | chr5:58111147-58111191                            | NM_018764:1909          | Pcdh7         | INSIDE                 | 0.321                                                        | 0.426                          | 3975.06            | 1691.86            | 0.137                          | 3268.28            | 446.41             |
| A_68_P23593815 | chr5:34679727-34679773                            | NM_011278:712           | Rnf4          | INSIDE                 | 0.321                                                        | 0.566                          | 1040.25            | 588.55             | 0.181                          | 829.14             | 150.44             |
| A_68_P25091298 | chr7:52384568-52384612                            | NM_009438:-485          | Rpl13a        | PROMOTER               | 0.321                                                        | 0.469                          | 1320.06            | 619.18             | 0.151                          | 1028.48            | 154.80             |
| A_68_P32036090 | chr19:26681592-26681637                           | NM_011416:1965          | Smarca2       | INSIDE                 | 0.321                                                        | 1.760                          | 1990.52            | 3503.15            | 0.564                          | 1480.23            | 835.27             |
| A_68_P25186101 | chr7:73205809-73205860                            | NM_021336:613           | Snrpa1        | INSIDE                 | 0.321                                                        | 0.520                          | 1014.95            | 527.50             | 0.167                          | 724.25             | 120.79             |
| A_68_P22339769 | chr3:94386307-94386351                            | NM_029721:296           | Snx27         | INSIDE                 | 0.321                                                        | 0.349                          | 4540.45            | 1585.08            | 0.112                          | 3089.74            | 346.00             |
| A_68_P20736172 | chr1:157005611-157005658                          | NM_021433:-198          | Stx6          | PROMOTER               | 0.321                                                        | 0.538                          | 1076.13            | 578.77             | 0.173                          | 864.75             | 149.38             |
| A_68_P30574321 | chr16:17530648-17530693                           | NM_026909:475           | Thap7         | INSIDE                 | 0.321                                                        | 0.704                          | 1900.52            | 1338.88            | 0.226                          | 1359.50            | 307.82             |
| A_68_P31206979 | chr17:46592282-46592326                           | NM_001162864:32320      | Tbkl1         | INSIDE                 | 0.321                                                        | 0.442                          | 2903.34            | 1284.53            | 0.142                          | 2013.32            | 286.35             |
| A_68_P31131060 | chr17:30141259-30141303                           | NM_148926:-751          | Zfand3        | PROMOTER               | 0.321                                                        | 0.624                          | 1409.90            | 879.83             | 0.200                          | 1049.12            | 209.91             |
| A_68_P31403204 | chr17:84587274-84587318                           | NM_001001806:-9         | Zfp36l2       | PROMOTER               | 0.321                                                        | 0.316                          | 3508.71            | 1107.40            | 0.101                          | 2651.07            | 268.22             |
| A_68_P30261322 | chr15:60654906-60654950                           | NR_030696:409           | 9930014A18Rik | INSIDE                 | 0.320                                                        | 1.433                          | 1224.73            | 1755.61            | 0.458                          | 1001.38            | 458.70             |
| A_68_P21568396 | chr2:119034800-119034844                          | NM_139139:-291          | Dnajc17       | PROMOTER               | 0.320                                                        | 0.621                          | 1302.31            | 808.98             | 0.199                          | 1076.80            | 213.97             |
| A_68_P23274592 | chr4:125168108-125168152                          | NM_001081097:56         | Grik3         | INSIDE                 | 0.320                                                        | 0.504                          | 1342.14            | 676.59             | 0.161                          | 1178.43            | 190.25             |
| A_68_P24982506 | chr7:17200789-17200833                            | NM_172739:-468          | Grf1          | PROMOTER               | 0.320                                                        | 0.468                          | 3258.55            | 1524.24            | 0.150                          | 2524.24            | 366.86             |
| A_68_P23352775 | chr4:139130999-139131044                          | NM_001205173:387        | Iffo2         | INSIDE                 | 0.320                                                        | 0.390                          | 1390.57            | 542.36             | 0.125                          | 1300.49            | 162.46             |
| A_68_P21842484 | chr2:168426628-168426674                          | NM_001037178:505        | Nfatc2        | INSIDE                 | 0.320                                                        | 0.543                          | 1560.13            | 847.85             | 0.174                          | 1209.19            | 210.28             |
| A_68_P22878698 | chr4:44723640-44723686                            | NM_008782:-350          | Pax5          | PROMOTER               | 0.320                                                        | 0.538                          | 1095.77            | 589.27             | 0.172                          | 901.83             | 155.05             |
| A_68_P29753373 | chr14:80173634-80173678                           | NM_001042726:-2537      | Pcdh8         | PROMOTER               | 0.320                                                        | 0.556                          | 1738.60            | 966.09             | 0.178                          | 1417.39            | 252.02             |
| A_68_P23232647 | chr4:116806257-116806301                          | NM_013807:279           | Plk3          | INSIDE                 | 0.320                                                        | 0.519                          | 1158.08            | 600.85             | 0.166                          | 940.16             | 155.99             |
| A_68_P27385035 | chr10:98569435-98569486                           | NM_027740:-344          | Poc1b         | PROMOTER               | 0.320                                                        | 0.651                          | 1178.64            | 767.44             | 0.208                          | 885.98             | 184.52             |
| A_68_P26136633 | chr8:108424693-108424737                          | NM_173432:341           | Pskh1         | INSIDE                 | 0.320                                                        | 0.553                          | 2032.17            | 1122.90            | 0.177                          | 1481.30            | 262.11             |
| A_68_P28974206 | chr13:40828928-40828972                           | NM_001122948:-3138      | Tefap2a       | PROMOTER               | 0.320                                                        | 0.595                          | 1180.07            | 702.09             | 0.191                          | 875.83             | 166.86             |
| A_68_P22336416 | chr3:93250348-93250392                            | NM_001163098:4119       | Tchh          | INSIDE                 | 0.320                                                        | 0.503                          | 1545.93            | 777.32             | 0.161                          | 1305.03            | 210.06             |
| A_68_P21396040 | chr2:84888732-84888776                            | NM_001081260:-1862      | Tnks1bp1      | PROMOTER               | 0.320                                                        | 0.685                          | 1542.69            | 1056.32            | 0.219                          | 1141.47            | 250.15             |
| A_68_P24950633 | chr7:4763653-4763698                              | NM_133777:267           | Ube2s         | INSIDE                 | 0.320                                                        | 0.696                          | 2552.57            | 1776.55            | 0.223                          | 1803.54            | 401.60             |
| A_68_P30084535 | chr15:25913713-25913757                           | NM_144523:-386          | Zfp622        | PROMOTER               | 0.320                                                        | 0.589                          | 1339.31            | 788.35             | 0.188                          | 1004.97            | 189.42             |
| A_68_P31465567 | chr18:4920993-4921047                             | ENSMUST00000143254:-703 |               | PROMOTER               | 0.320                                                        | 0.521                          | 1024.66            | 534.01             | 0.167                          | 865.10             | 144.32             |
| A_68_P27765617 | chr11:45869706-45869750                           | NM_009616:240           | Adam19        | INSIDE                 | 0.319                                                        | 0.584                          | 2450.04            | 1431.58            | 0.186                          | 1938.75            | 361.00             |
| A_68_P32260348 | chrX:11665608-11665652                            | NM_029510:-7951         | Beor          | PROMOTER               | 0.319                                                        | 0.565                          | 1677.90            | 947.72             | 0.180                          | 676.34             | 121.68             |
| A_68_P23397714 | chr4:148326567-148326611                          | NM_001159344:148088     | Cas21         | INSIDE                 | 0.319                                                        | 0.446                          | 4925.34            | 2196.24            | 0.142                          | 3600.04            | 511.90             |
| A_68_P21325835 | chr2:72314881-72314927                            | NM_025866:629           | Cdea7         | INSIDE                 | 0.319                                                        | 0.669                          | 1191.25            | 796.55             | 0.214                          | 945.63             | 201.98             |
| A_68_P28143433 | chr11:113546017-113546061                         | NM_177777:313           | D11Wsu47c     | INSIDE                 | 0.319                                                        | 0.698                          | 1910.64            | 1333.85            | 0.222                          | 1321.37            | 294.00             |
| A_68_P29488027 | chr14:28436033-28436077                           | NM_177814:427           | Erc2          | INSIDE                 | 0.319                                                        | 1.875                          | 4506.26            | 8451.34            | 0.599                          | 2846.84            | 1705.57            |
| A_68_P32461568 | chrX:70473551-70473595                            | NM_007978:-72           | F8a           | PROMOTER               | 0.319                                                        | 1.492                          | 1712.51            | 2555.71            | 0.476                          | 617.47             | 293.75             |
| A_68_P21784859 | chr2:158593842-158593886                          | NM_027975:30            | Fam83d        | INSIDE                 | 0.319                                                        | 0.389                          | 2629.73            | 1022.84            | 0.124                          | 2015.92            | 250.46             |
| A_68_P27561155 | chr11:4962120-4962164                             | NM_001190406:3188       | Gas2l1        | INSIDE                 | 0.319                                                        | 0.639                          | 1889.53            | 1208.16            | 0.204                          | 1423.13            | 290.20             |
| A_68_P24980081 | chr7:16760697-16760741                            | NM_008627:-10           | Meis3         | PROMOTER               | 0.319                                                        | 0.416                          | 1308.51            | 543.77             | 0.133                          | 1110.65            | 147.46             |
| A_68_P25471699 | chr7:128177893-128177937                          | NM_021554:-44           | Mettl9        | PROMOTER               | 0.319                                                        | 0.628                          | 917.67             | 575.84             | 0.200                          | 724.47             | 145.05             |
| A_68_P20224249 | chr1:51972342-51972397                            | NM_001161817:449        | Myo1b         | INSIDE                 | 0.319                                                        | 0.593                          | 953.15             | 565.63             | 0.189                          | 766.66             | 145.17             |
| A_68_P21199928 | chr2:48804507-48804551                            | NR_033442:259           | Orc4          | INSIDE                 | 0.319                                                        | 0.641                          | 1113.59            | 713.64             | 0.204                          | 871.92             | 178.04             |
| A_68_P24595788 | chr6:83781684-83781728                            | NM_146169:29            | Paip2b        | INSIDE                 | 0.319                                                        | 0.442                          | 1996.92            | 883.24             | 0.141                          | 1585.98            | 223.94             |
| A_68_P32089879 | chr19:36483936-36483983                           | NM_029508:30403         | Pegf5         | INSIDE                 | 0.319                                                        | 0.629                          | 1456.26            | 915.91             | 0.201                          | 1108.73            | 222.72             |
| A_68_P30441118 | chr15:92227846-92227890                           | NM_001164593:628        | Pdzrn4        | INSIDE                 | 0.319                                                        | 0.533                          | 1499.69            | 799.03             | 0.170                          | 1237.59            | 210.44             |
| A_68_P31256335 | chr17:56601867-56601911                           | NM_011218:14015         | Ptprs         | INSIDE                 | 0.319                                                        | 0.480                          | 1171.26            | 561.67             | 0.153                          | 790.94             | 121.16             |
| A_68_P29430092 | chr14:17408235-17408279                           | NM_011243:-532          | Rarb          | PROMOTER               | 0.319                                                        | 0.438                          | 2884.54            | 1262.51            | 0.140                          | 2205.74            | 308.24             |

| ProbeName      | Target position of probe on CpG island microarray | TargetID               | GeneSymbol    | CpG island Description | Ratio of relative methylation (TiO <sub>2</sub> -NP/Vehicle) | Sham group                     |                    |                    | TiO <sub>2</sub> -H group      |                    |                    |
|----------------|---------------------------------------------------|------------------------|---------------|------------------------|--------------------------------------------------------------|--------------------------------|--------------------|--------------------|--------------------------------|--------------------|--------------------|
|                |                                                   |                        |               |                        |                                                              | Relative methylation (Cy5/Cy3) | Cy3 signal (Input) | Cy5 signal (MeDIP) | Relative methylation (Cy5/Cy3) | Cy3 signal (Input) | Cy5 signal (MeDIP) |
| A_68_P30575777 | chr16:17802822-17802869                           | NM_153790:5471         | Scarf2        | INSIDE                 | 0.319                                                        | 0.660                          | 996.82             | 658.39             | 0.211                          | 732.58             | 154.45             |
| A_68_P27131116 | chr10:50614810-50614854                           | NM_011376:-624         | Sim1          | PROMOTER               | 0.319                                                        | 0.516                          | 2206.95            | 1138.45            | 0.164                          | 1878.92            | 308.99             |
| A_68_P24039147 | chr5:120961336-120961380                          | NM_001177594:158       | Slc24a6       | INSIDE                 | 0.319                                                        | 0.473                          | 1197.17            | 566.24             | 0.151                          | 803.21             | 121.16             |
| A_68_P27176491 | chr10:60215496-60215540                           | NM_023596:12           | Slc29a3       | INSIDE                 | 0.319                                                        | 0.461                          | 4027.72            | 1857.59            | 0.147                          | 2857.79            | 420.10             |
| A_68_P23322291 | chr4:133899284-133899328                          | NM_001039677:322       | Slc30a2       | INSIDE                 | 0.319                                                        | 0.547                          | 1470.19            | 804.25             | 0.174                          | 1230.34            | 214.66             |
| A_68_P31055162 | chr17:13153233-13153278                           | NM_009338:336          | Acat2         | INSIDE                 | 0.318                                                        | 0.538                          | 1930.12            | 1038.46            | 0.171                          | 1383.85            | 236.51             |
| A_68_P28109099 | chr11:107655337-107655381                         | NM_019431:420          | Caecng4       | INSIDE                 | 0.318                                                        | 0.648                          | 1051.32            | 681.39             | 0.206                          | 825.45             | 170.02             |
| A_68_P27533699 | chr10:126486293-126486337                         | NM_010009:1013         | Cyp27b1       | INSIDE                 | 0.318                                                        | 0.531                          | 2346.75            | 1245.55            | 0.169                          | 1762.54            | 297.73             |
| A_68_P22863377 | chr4:41586983-41587027                            | NM_027147:331          | Enho          | INSIDE                 | 0.318                                                        | 0.518                          | 2096.37            | 1085.56            | 0.165                          | 1714.52            | 282.75             |
| A_68_P32213509 | chr19:58528941-58528985                           | NM_010279:-6           | Gfra1         | PROMOTER               | 0.318                                                        | 0.585                          | 1261.52            | 738.16             | 0.186                          | 986.24             | 183.24             |
| A_68_P26531906 | chr9:55394278-55394322                            | NM_027397:5345         | Isl2          | DOWNSTREAM             | 0.318                                                        | 0.540                          | 1898.94            | 1024.76            | 0.172                          | 1440.71            | 247.57             |
| A_68_P31074431 | chr17:17762209-17762253                           | NM_172827:-777         | Lnpep         | PROMOTER               | 0.318                                                        | 0.525                          | 2919.16            | 1531.48            | 0.167                          | 2095.34            | 349.74             |
| A_68_P22552361 | chr3:135148732-135148776                          | NM_027288:180          | Manba         | INSIDE                 | 0.318                                                        | 0.553                          | 1312.87            | 725.90             | 0.176                          | 1150.75            | 202.41             |
| A_68_P30345375 | chr15:75828132-75828176                           | NM_177922:3956         | Mapk15        | INSIDE                 | 0.318                                                        | 0.516                          | 1004.95            | 518.50             | 0.164                          | 725.96             | 119.26             |
| A_68_P28103512 | chr11:106648993-106649037                         | NR_037224:-4941        | Mir3064       | PROMOTER               | 0.318                                                        | 0.560                          | 914.62             | 512.44             | 0.178                          | 720.70             | 128.57             |
| A_68_P30132611 | chr15:35225684-35225737                           | NM_054049:-156         | Osr2          | PROMOTER               | 0.318                                                        | 0.636                          | 811.22             | 516.13             | 0.202                          | 588.59             | 118.99             |
| A_68_P27638907 | chr11:21901433-21901477                           | NM_011023:200          | Otx1          | INSIDE                 | 0.318                                                        | 0.392                          | 1595.62            | 626.26             | 0.125                          | 1330.84            | 166.15             |
| A_68_P31128228 | chr17:29627044-29627088                           | NM_008842:-923         | Pim1          | PROMOTER               | 0.318                                                        | 0.649                          | 4174.97            | 2710.75            | 0.207                          | 2967.55            | 613.15             |
| A_68_P27430001 | chr10:107598764-107598808                         | NM_027892:-669         | Ppp1r12a      | PROMOTER               | 0.318                                                        | 0.448                          | 3455.67            | 1549.30            | 0.143                          | 2476.59            | 353.05             |
| A_68_P31000873 | chr16:97984845-97984902                           | NM_023663:489          | Ripk4         | INSIDE                 | 0.318                                                        | 0.584                          | 961.88             | 561.91             | 0.186                          | 623.95             | 115.79             |
| A_68_P30655991 | chr16:33056419-33056463                           | NM_001130485:-98       | Rpl35a        | DIVERGENT_PROMOTER     | 0.318                                                        | 0.467                          | 1287.12            | 601.27             | 0.149                          | 957.31             | 142.25             |
| A_68_P31257290 | chr17:56753266-56753310                           | NM_018730:471          | Rpl36         | INSIDE                 | 0.318                                                        | 0.500                          | 1535.88            | 768.11             | 0.159                          | 1069.97            | 170.13             |
| A_68_P25007067 | chr7:25669258-25669302                            | NM_023133:-452         | Rps19         | PROMOTER               | 0.318                                                        | 0.571                          | 1920.01            | 1096.01            | 0.182                          | 1364.94            | 247.75             |
| A_68_P23271975 | chr4:124744170-124744214                          | NM_175246:256          | Snip1         | INSIDE                 | 0.318                                                        | 0.459                          | 1387.67            | 636.97             | 0.146                          | 1112.09            | 162.20             |
| A_68_P24838282 | chr6:128250695-128250739                          | NM_001080979:115       | Tead4         | INSIDE                 | 0.318                                                        | 0.286                          | 7210.52            | 2061.40            | 0.091                          | 5771.82            | 524.63             |
| A_68_P24981256 | chr7:16985178-16985232                            | NM_198631:-1340        | Zc3h4         | PROMOTER               | 0.318                                                        | 0.373                          | 1449.53            | 540.10             | 0.118                          | 1015.44            | 120.28             |
| A_68_P30499541 | chr15:102577044-102577088                         |                        |               | Unknown                | 0.318                                                        | 0.673                          | 2925.98            | 1970.03            | 0.214                          | 2076.54            | 444.32             |
| A_68_P21761659 | chr2:154483174-154483218                          | NM_029362:435          | Chmp4b        | INSIDE                 | 0.317                                                        | 0.423                          | 1221.21            | 517.10             | 0.134                          | 874.38             | 117.31             |
| A_68_P24025032 | chr5:118619420-118619464                          | NM_007545:-330         | Hrk           | PROMOTER               | 0.317                                                        | 0.498                          | 2773.27            | 1380.12            | 0.158                          | 2013.37            | 317.57             |
| A_68_P24025031 | chr5:118619337-118619381                          | NM_007545:-414         | Hrk           | PROMOTER               | 0.317                                                        | 0.580                          | 2371.16            | 1376.46            | 0.184                          | 1975.67            | 363.65             |
| A_68_P25016220 | chr7:28013751-28013795                            | NM_181593:-156         | Itpke         | DIVERGENT_PROMOTER     | 0.317                                                        | 0.561                          | 2029.10            | 1138.64            | 0.178                          | 1501.37            | 266.96             |
| A_68_P21258085 | chr2:60221190-60221234                            | NM_013825:76           | Ly75          | INSIDE                 | 0.317                                                        | 0.518                          | 3628.14            | 1880.21            | 0.164                          | 2695.63            | 442.78             |
| A_68_P26075861 | chr8:96696797-96696851                            | NM_008630:307          | Mt2           | INSIDE                 | 0.317                                                        | 0.474                          | 1129.70            | 535.59             | 0.150                          | 913.33             | 137.27             |
| A_68_P32181719 | chr19:53384898-53384942                           | NM_001008542:-75       | Mxi1          | PROMOTER               | 0.317                                                        | 0.645                          | 2113.80            | 1363.71            | 0.205                          | 1652.54            | 338.46             |
| A_68_P23592016 | chr5:34338666-34338710                            | NM_001001985:56        | Nat8l         | INSIDE                 | 0.317                                                        | 0.731                          | 2467.43            | 1804.16            | 0.232                          | 2011.04            | 465.66             |
| A_68_P31934468 | chr19:6399999-6400043                             | NM_011242:-562         | Rasgrp2       | PROMOTER               | 0.317                                                        | 0.548                          | 4238.66            | 2323.82            | 0.174                          | 3283.47            | 570.34             |
| A_68_P25481826 | chr7:130114107-130114151                          | NM_175023:51           | Rbbp6         | INSIDE                 | 0.317                                                        | 0.383                          | 1654.05            | 634.13             | 0.121                          | 1313.93            | 159.46             |
| A_68_P26809957 | chr9:107514932-107514976                          | NM_001042779:-3382     | Sema3b        | PROMOTER               | 0.317                                                        | 0.678                          | 2737.19            | 1855.43            | 0.215                          | 2093.27            | 449.55             |
| A_68_P21095246 | chr2:28980261-28980312                            | NM_198033:-225         | Setx          | PROMOTER               | 0.317                                                        | 0.507                          | 1048.02            | 531.44             | 0.161                          | 734.92             | 118.04             |
| A_68_P27138497 | chr10:52410862-52410906                           | NM_178675:578          | Slc35f1       | INSIDE                 | 0.317                                                        | 0.561                          | 1223.00            | 686.52             | 0.178                          | 1010.72            | 179.68             |
| A_68_P24445012 | chr6:51542432-51542476                            | NM_001127348:47933     | Snx10         | DOWNSTREAM             | 0.317                                                        | 0.610                          | 1280.18            | 781.43             | 0.193                          | 957.39             | 185.08             |
| A_68_P24521964 | chr6:67485578-67485622                            | NM_020047:216          | Tacstd2       | INSIDE                 | 0.317                                                        | 0.706                          | 1491.28            | 1053.38            | 0.224                          | 1233.32            | 276.08             |
| A_68_P27355935 | chr10:93296839-93296883                           | NM_183199:2561         | Usp44         | INSIDE                 | 0.317                                                        | 0.467                          | 2048.29            | 957.04             | 0.148                          | 1560.01            | 231.12             |
| A_68_P23164320 | chr4:102786738-102786782                          | NM_146254:144          | Wdr78         | INSIDE                 | 0.317                                                        | 0.528                          | 2194.19            | 1157.74            | 0.167                          | 1559.94            | 260.85             |
| A_68_P25600979 | chr7:150631268-150631312                          |                        |               | Unknown                | 0.317                                                        | 0.360                          | 1578.17            | 568.85             | 0.114                          | 1241.19            | 141.74             |
| A_68_P30402003 | chr15:85476603-85476647                           | AK037366:-9471         |               | PROMOTER               | 0.317                                                        | 0.670                          | 1375.33            | 921.96             | 0.213                          | 1074.05            | 228.48             |
| A_68_P24043270 | chr5:121671022-121671067                          | ENSMUST00000119892:817 |               | INSIDE                 | 0.317                                                        | 0.620                          | 1458.64            | 904.56             | 0.196                          | 1063.94            | 209.06             |
| A_68_P28532685 | chr12:73637141-73637185                           |                        | 1810048J11Rik | PROMOTER               | 0.316                                                        | 0.558                          | 1404.89            | 784.23             | 0.176                          | 1118.08            | 196.99             |
| A_68_P20997485 | chr2:9803030-9803074                              | NR_024257:180          | 4930412O13Rik | INSIDE                 | 0.316                                                        | 0.640                          | 2306.32            | 1475.50            | 0.202                          | 1708.55            | 345.24             |
| A_68_P29480018 | chr14:26661840-26661884                           | NM_013469:222          | Anxa11        | INSIDE                 | 0.316                                                        | 0.637                          | 1341.51            | 853.91             | 0.201                          | 1069.02            | 215.21             |
| A_68_P29599143 | chr14:51544686-51544730                           | NM_009687:85           | Apex1         | INSIDE                 | 0.316                                                        | 0.568                          | 1054.30            | 599.15             | 0.180                          | 808.85             | 145.22             |

| ProbeName      | Target position of probe on CpG island microarray | TargetID                 | GeneSymbol    | CpG island Description | Ratio of relative methylation (TiO <sub>2</sub> -NP/Vehicle) | Sham group                     |                    |                    | TiO <sub>2</sub> -H group      |                    |                    |
|----------------|---------------------------------------------------|--------------------------|---------------|------------------------|--------------------------------------------------------------|--------------------------------|--------------------|--------------------|--------------------------------|--------------------|--------------------|
|                |                                                   |                          |               |                        |                                                              | Relative methylation (Cy5/Cy3) | Cy3 signal (Input) | Cy5 signal (MeDIP) | Relative methylation (Cy5/Cy3) | Cy3 signal (Input) | Cy5 signal (MeDIP) |
| A_68_P25429192 | chr7:120352049-120352095                          | NM_007489:1094           | Arntl         | INSIDE                 | 0.316                                                        | 0.677                          | 1310.12            | 886.85             | 0.214                          | 1060.90            | 226.75             |
| A_68_P23410311 | chr4:150503055-150503099                          | NM_001081557:732801      | Camta1        | INSIDE                 | 0.316                                                        | 0.605                          | 1254.59            | 758.51             | 0.191                          | 959.68             | 183.07             |
| A_68_P24084082 | chr5:129107740-129107784                          | NM_175284:782            | Fzd10         | INSIDE                 | 0.316                                                        | 0.452                          | 2566.07            | 1159.99            | 0.143                          | 1964.88            | 281.06             |
| A_68_P31876071 | chr18:82575755-82575799                           | NM_008082:393            | Galr1         | INSIDE                 | 0.316                                                        | 0.578                          | 2794.97            | 1614.79            | 0.182                          | 2046.50            | 373.42             |
| A_68_P25362934 | chr7:106774303-106774347                          | NM_001195529:1289        | Gm4980        | INSIDE                 | 0.316                                                        | 0.565                          | 1208.77            | 682.81             | 0.178                          | 990.43             | 176.61             |
| A_68_P28118144 | chr11:109223851-109223895                         | NM_010303:-235           | Gna13         | PROMOTER               | 0.316                                                        | 0.700                          | 2039.32            | 1427.59            | 0.221                          | 1392.58            | 307.64             |
| A_68_P21114434 | chr2:32143877-32143921                            | NM_001080968:126         | Golga2        | INSIDE                 | 0.316                                                        | 0.640                          | 976.66             | 624.91             | 0.202                          | 710.52             | 143.72             |
| A_68_P27827763 | chr11:57644849-57644893                           | NM_008213:779            | Hand1         | INSIDE                 | 0.316                                                        | 0.473                          | 1204.13            | 569.65             | 0.150                          | 795.06             | 118.89             |
| A_68_P27185478 | chr10:61802859-61802903                           | NM_001146100:289         | Hk1           | INSIDE                 | 0.316                                                        | 0.517                          | 1844.88            | 953.18             | 0.163                          | 1390.06            | 227.01             |
| A_68_P21122772 | chr2:33498002-33498046                            | NM_010725:-1993          | Lmx1b         | PROMOTER               | 0.316                                                        | 0.547                          | 2287.78            | 1251.52            | 0.173                          | 1801.96            | 311.68             |
| A_68_P31462759 | chr18:4353279-4353323                             | NM_007746:-349           | Map3k8        | PROMOTER               | 0.316                                                        | 0.508                          | 2271.95            | 1155.14            | 0.161                          | 1776.76            | 285.32             |
| A_68_P23536404 | chr5:22938833-22938877                            | NM_026984:-1392          | Mil5          | PROMOTER               | 0.316                                                        | 1.442                          | 6877.37            | 9913.78            | 0.456                          | 4615.31            | 2104.90            |
| A_68_P20023668 | chr1:9690963-9691016                              | NM_008651:-699           | Mybl1         | PROMOTER               | 0.316                                                        | 0.610                          | 918.92             | 560.66             | 0.193                          | 638.57             | 123.00             |
| A_68_P28055689 | chr11:98188746-98188790                           | NM_010895:2191           | Neurod2       | INSIDE                 | 0.316                                                        | 0.447                          | 1637.45            | 732.22             | 0.141                          | 1423.29            | 201.24             |
| A_68_P20878432 | chr1:182834386-182834430                          | NM_133705:4              | Pycr2         | INSIDE                 | 0.316                                                        | 0.464                          | 1487.39            | 690.74             | 0.147                          | 1191.12            | 174.93             |
| A_68_P27209845 | chr10:66560085-66560129                           | NM_001204915:-370        | Reep3         | PROMOTER               | 0.316                                                        | 0.725                          | 1973.20            | 1431.51            | 0.229                          | 1480.80            | 338.96             |
| A_68_P24604449 | chr6:85282873-85282917                            | NM_178639:522            | Sfxn5         | INSIDE                 | 0.316                                                        | 0.519                          | 1896.78            | 984.59             | 0.164                          | 1488.04            | 243.94             |
| A_68_P32182255 | chr19:53465351-53465395                           | NM_172429:-309           | Smndc1        | PROMOTER               | 0.316                                                        | 1.720                          | 2194.67            | 3775.73            | 0.543                          | 1466.27            | 796.49             |
| A_68_P21106145 | chr2:30808853-30808897                            | NM_133673:354            | Tor1b         | INSIDE                 | 0.316                                                        | 0.420                          | 1700.27            | 714.36             | 0.133                          | 1334.02            | 177.11             |
| A_68_P30388853 | chr15:83341230-83341274                           | NM_178869:85             | Till1         | INSIDE                 | 0.316                                                        | 0.708                          | 2039.81            | 1444.84            | 0.224                          | 1502.97            | 336.53             |
| A_68_P27543029 | chr10:128185074-128185118                         | NM_001170869:-481        | Wibg          | PROMOTER               | 0.316                                                        | 0.494                          | 1122.91            | 554.87             | 0.156                          | 771.19             | 120.26             |
| A_68_P25261707 | chr7:86681146-86681190                            | ENSMUST00000141822:36166 |               | DOWNSTREAM             | 0.316                                                        | 0.710                          | 2052.49            | 1457.51            | 0.225                          | 1648.24            | 370.40             |
| A_68_P24864301 | chr6:134878457-134878501                          | NR_037955:-631           | 1190002F15Rik | PROMOTER               | 0.315                                                        | 0.694                          | 1887.29            | 1309.59            | 0.219                          | 1288.40            | 281.77             |
| A_68_P26217964 | chr8:122637936-122637980                          | NM_001163762:-93         | 6430548M08Rik | PROMOTER               | 0.315                                                        | 0.529                          | 2610.81            | 1379.95            | 0.166                          | 2055.91            | 341.82             |
| A_68_P28574814 | chr12:81360288-81360334                           | NM_134156:1048           | Actn1         | INSIDE                 | 0.315                                                        | 0.606                          | 2559.63            | 1550.15            | 0.191                          | 1984.65            | 378.58             |
| A_68_P22864000 | chr4:41672774-41672818                            | NM_001017362:5378        | Arid3c        | INSIDE                 | 0.315                                                        | 0.641                          | 798.47             | 511.82             | 0.202                          | 684.75             | 138.37             |
| A_68_P23418117 | chr4:151712690-151712736                          | NM_001081376:-47         | Chd5          | PROMOTER               | 0.315                                                        | 0.338                          | 2320.97            | 783.66             | 0.106                          | 1837.66            | 195.40             |
| A_68_P26665710 | chr9:79567360-79567404                            | NM_007730:-897           | Col12a1       | PROMOTER               | 0.315                                                        | 0.698                          | 2718.00            | 1897.60            | 0.220                          | 2040.62            | 448.42             |
| A_68_P28924099 | chr13:31721274-31721321                           | NM_010225:3613           | Foxf2         | INSIDE                 | 0.315                                                        | 0.404                          | 1337.29            | 540.05             | 0.127                          | 908.42             | 115.62             |
| A_68_P27290416 | chr10:81008062-81008106                           | NM_010301:-293           | Gna11         | PROMOTER               | 0.315                                                        | 0.629                          | 1392.76            | 876.66             | 0.199                          | 1151.07            | 228.51             |
| A_68_P22325243 | chr3:90237709-90237753                            | NM_145540:-172           | Ints3         | PROMOTER               | 0.315                                                        | 0.558                          | 932.57             | 520.14             | 0.176                          | 714.91             | 125.68             |
| A_68_P28084316 | chr11:103128366-103128410                         | NM_016896:327            | Map3k14       | INSIDE                 | 0.315                                                        | 0.533                          | 2663.72            | 1420.95            | 0.168                          | 1903.82            | 320.35             |
| A_68_P25955963 | chr8:73796755-73796799                            | NM_001142322:164         | Myo9b         | INSIDE                 | 0.315                                                        | 0.581                          | 1757.69            | 1021.08            | 0.183                          | 1279.05            | 233.95             |
| A_68_P28077768 | chr11:102007243-102007287                         | NM_178053:-415           | Nags          | PROMOTER               | 0.315                                                        | 0.517                          | 1829.39            | 945.43             | 0.163                          | 1325.77            | 215.72             |
| A_68_P30381130 | chr15:81877398-81877442                           | NM_011482:608            | Nhp211        | INSIDE                 | 0.315                                                        | 0.708                          | 1465.01            | 1036.69            | 0.223                          | 1070.02            | 238.28             |
| A_68_P31861995 | chr18:80244514-80244558                           | NM_053117:903            | Pard6g        | INSIDE                 | 0.315                                                        | 0.662                          | 1985.56            | 1314.53            | 0.208                          | 1482.63            | 308.80             |
| A_68_P22590679 | chr3:142058808-142058852                          | NM_001190852:-170        | Pdlim5        | PROMOTER               | 0.315                                                        | 0.562                          | 1240.68            | 697.58             | 0.177                          | 985.94             | 174.41             |
| A_68_P26476668 | chr9:45715123-45715167                            | NM_178709:-184           | Rnf214        | PROMOTER               | 0.315                                                        | 0.693                          | 1634.38            | 1132.30            | 0.219                          | 1365.83            | 298.51             |
| A_68_P29620552 | chr14:56519022-56519066                           | NM_001082975:25          | Sdr39u1       | INSIDE                 | 0.315                                                        | 0.709                          | 3748.22            | 2658.11            | 0.223                          | 2769.29            | 618.42             |
| A_68_P28778765 | chr12:119540713-119540757                         | NM_001166385:-821        | Sp4           | PROMOTER               | 0.315                                                        | 0.479                          | 3913.42            | 1875.75            | 0.151                          | 2958.73            | 446.12             |
| A_68_P23819151 | chr5:77403818-77403862                            | NM_025691:115            | Srp72         | INSIDE                 | 0.315                                                        | 0.455                          | 1208.35            | 549.44             | 0.143                          | 903.88             | 129.65             |
| A_68_P27997502 | chr11:87860747-87860791                           | NM_001078167:-404        | Srsf1         | PROMOTER               | 0.315                                                        | 0.580                          | 1194.48            | 693.03             | 0.183                          | 953.83             | 174.32             |
| A_68_P27269198 | chr10:77068646-77068690                           | NM_019929:-310           | Sumo3         | PROMOTER               | 0.315                                                        | 0.606                          | 1287.95            | 780.64             | 0.191                          | 1038.66            | 198.12             |
| A_68_P28744144 | chr12:112683687-112683731                         | NM_009396:2837           | Tnfrsf2       | INSIDE                 | 0.315                                                        | 0.641                          | 1159.38            | 742.68             | 0.202                          | 841.52             | 169.59             |
| A_68_P30207183 | chr15:50721969-50722024                           | NM_032000:-409           | Trps1         | PROMOTER               | 0.315                                                        | 0.446                          | 1413.75            | 629.93             | 0.140                          | 1070.76            | 150.24             |
| A_68_P24954373 | chr7:6124443-6124487                              | NM_001146024:350         | Zfp444        | INSIDE                 | 0.315                                                        | 1.391                          | 1459.96            | 2030.37            | 0.438                          | 1044.12            | 456.88             |
| A_68_P28056476 | chr11:98300031-98300075                           | NM_025559:250            | 1810046J19Rik | INSIDE                 | 0.314                                                        | 0.612                          | 1741.14            | 1065.91            | 0.192                          | 1258.27            | 241.81             |
| A_68_P29654694 | chr14:62911407-62911451                           | NM_173419:388            | Dleu7         | INSIDE                 | 0.314                                                        | 0.609                          | 1151.47            | 700.81             | 0.191                          | 1040.00            | 198.47             |
| A_68_P28056287 | chr11:98273671-98273715                           | NM_001003817:-105        | Erbp2         | PROMOTER               | 0.314                                                        | 0.709                          | 1513.44            | 1072.42            | 0.223                          | 1206.13            | 268.51             |
| A_68_P23973608 | chr5:109123109-109123153                          | NM_001164259:-115        | Fgfr11        | PROMOTER               | 0.314                                                        | 0.691                          | 5348.29            | 3695.93            | 0.217                          | 4106.77            | 890.10             |
| A_68_P31603480 | chr18:32719536-32719580                           | NM_001048207:130         | Gypc          | INSIDE                 | 0.314                                                        | 0.565                          | 2544.38            | 1437.98            | 0.178                          | 2085.18            | 370.43             |

| ProbeName      | Target position of probe on CpG island microarray | TargetID                | GeneSymbol    | CpG island Description | Ratio of relative methylation (TiO <sub>2</sub> -NP/Vehicle) | Sham group                     |                    |                    | TiO <sub>2</sub> -H group      |                    |                    |
|----------------|---------------------------------------------------|-------------------------|---------------|------------------------|--------------------------------------------------------------|--------------------------------|--------------------|--------------------|--------------------------------|--------------------|--------------------|
|                |                                                   |                         |               |                        |                                                              | Relative methylation (Cy5/Cy3) | Cy3 signal (Input) | Cy5 signal (MeDIP) | Relative methylation (Cy5/Cy3) | Cy3 signal (Input) | Cy5 signal (MeDIP) |
| A_68_P25375733 | chr7:108986683-108986727                          | NM_001122739--366       | Inpp1l        | PROMOTER               | 0.314                                                        | 0.672                          | 1783.11            | 1198.28            | 0.211                          | 1355.05            | 285.97             |
| A_68_P25574931 | chr7:146132875-146132921                          | NM_028708:466           | Jakmp3        | INSIDE                 | 0.314                                                        | 0.348                          | 1561.07            | 543.97             | 0.109                          | 1085.34            | 118.67             |
| A_68_P27836981 | chr11:59263741-59263785                           | NM_001205068:216        | Jmjd4         | INSIDE                 | 0.314                                                        | 0.623                          | 2470.69            | 1539.18            | 0.196                          | 1856.16            | 362.91             |
| A_68_P30366871 | chr15:79335939-79335983                           | NM_008427:-289          | Kenj4         | PROMOTER               | 0.314                                                        | 0.643                          | 1312.02            | 843.23             | 0.202                          | 1044.58            | 210.62             |
| A_68_P30347742 | chr15:76181910-76181954                           | NM_001164607:209        | Maf1          | INSIDE                 | 0.314                                                        | 0.671                          | 1461.02            | 980.13             | 0.211                          | 1140.91            | 240.20             |
| A_68_P26805732 | chr9:106794296-106794340                          | NM_029103:-49           | Manf          | PROMOTER               | 0.314                                                        | 0.556                          | 969.69             | 538.82             | 0.174                          | 714.03             | 124.51             |
| A_68_P22317994 | chr3:89031385-89031429                            | NR_030579:-286          | Mir92b        | DIVERGENT_PROMOTER     | 0.314                                                        | 0.649                          | 1222.94            | 793.11             | 0.204                          | 839.30             | 170.98             |
| A_68_P25953851 | chr8:73284450-73284494                            | NM_183170:348           | Mpv17l2       | INSIDE                 | 0.314                                                        | 0.634                          | 957.66             | 607.23             | 0.199                          | 768.90             | 153.06             |
| A_68_P23820898 | chr5:77739527-77739571                            | NM_153798:40            | Polr2b        | INSIDE                 | 0.314                                                        | 0.429                          | 1266.53            | 542.83             | 0.135                          | 898.13             | 120.83             |
| A_68_P21044982 | chr2:19368271-19368321                            | NM_018809:1007          | Ptf1a         | INSIDE                 | 0.314                                                        | 0.649                          | 1022.44            | 663.67             | 0.204                          | 734.30             | 149.56             |
| A_68_P20681326 | chr1:145851560-145851609                          | NM_009061:-305          | Rgs2          | PROMOTER               | 0.314                                                        | 0.576                          | 1052.78            | 606.92             | 0.181                          | 772.29             | 139.63             |
| A_68_P29073051 | chr13:58502488-58502536                           | NR_031761:-1096         | Rmi1          | DIVERGENT_PROMOTER     | 0.314                                                        | 0.444                          | 1268.57            | 563.20             | 0.139                          | 1019.57            | 142.17             |
| A_68_P20409777 | chr1:87914871-87914915                            | NM_027029:-3624         | Spata3        | PROMOTER               | 0.314                                                        | 0.683                          | 2260.61            | 1543.56            | 0.215                          | 1734.78            | 372.44             |
| A_68_P24817040 | chr6:124755640-124755684                          | NM_013539:-3296         | Spsb2         | PROMOTER               | 0.314                                                        | 0.475                          | 1229.87            | 584.16             | 0.149                          | 957.83             | 142.90             |
| A_68_P22338874 | chr3:94217114-94217158                            | NM_028307:-103          | Tdrkh         | PROMOTER               | 0.314                                                        | 0.599                          | 1901.27            | 1139.41            | 0.188                          | 1400.04            | 263.38             |
| A_68_P23196088 | chr4:108131810-108131854                          | NM_175472:-198          | Zecbc11       | PROMOTER               | 0.314                                                        | 0.516                          | 1517.11            | 783.36             | 0.162                          | 1236.15            | 200.63             |
| A_68_P32603683 | chrX:109714707-109714751                          | NM_177747:594           | Zfp711        | INSIDE                 | 0.314                                                        | 1.682                          | 1399.18            | 2352.86            | 0.527                          | 652.40             | 343.98             |
| A_68_P22283290 | chr3:82932104-82932148                            | ENSMUST00000047876:1042 |               | INSIDE                 | 0.314                                                        | 0.474                          | 1142.87            | 541.57             | 0.149                          | 816.45             | 121.55             |
| A_68_P27835626 | chr11:59041120-59041164                           | NM_001130408:522        | Arf1          | INSIDE                 | 0.313                                                        | 0.455                          | 1172.79            | 533.81             | 0.143                          | 912.01             | 130.09             |
| A_68_P26035027 | chr8:89996039-89996083                            | NM_019626:431           | Cbln1         | INSIDE                 | 0.313                                                        | 0.497                          | 2682.57            | 1334.19            | 0.156                          | 1960.44            | 305.02             |
| A_68_P28175796 | chr11:118951645-118951689                         | NM_007625:-4115         | Cbx4          | PROMOTER               | 0.313                                                        | 0.570                          | 1703.95            | 971.16             | 0.178                          | 1352.97            | 241.16             |
| A_68_P24432032 | chr6:49269455-49269499                            | NM_175098:125           | Ccdc126       | INSIDE                 | 0.313                                                        | 0.599                          | 1074.03            | 643.78             | 0.188                          | 910.61             | 170.88             |
| A_68_P28575796 | chr12:81564448-81564492                           | NM_133798:389           | Exd2          | INSIDE                 | 0.313                                                        | 0.562                          | 1070.64            | 601.76             | 0.176                          | 932.09             | 164.02             |
| A_68_P21569059 | chr2:119151913-119151957                          | NR_030683:-1            | Gm14207       | PROMOTER               | 0.313                                                        | 0.610                          | 2568.77            | 1565.77            | 0.191                          | 1984.18            | 378.63             |
| A_68_P26346746 | chr9:21172514-21172558                            | NM_001042708:90         | Ilf3          | INSIDE                 | 0.313                                                        | 0.616                          | 1991.46            | 1226.19            | 0.193                          | 1459.73            | 281.48             |
| A_68_P24990788 | chr7:19577261-19577305                            | NM_145579:689           | Mypop         | INSIDE                 | 0.313                                                        | 0.560                          | 1902.02            | 1065.02            | 0.175                          | 1477.16            | 258.81             |
| A_68_P23362016 | chr4:140633999-140634043                          | NM_025383:240           | Necap2        | INSIDE                 | 0.313                                                        | 0.457                          | 1134.93            | 518.54             | 0.143                          | 939.91             | 134.60             |
| A_68_P24618280 | chr6:87761089-87761133                            | NM_133717:-1362         | Rab43         | PROMOTER               | 0.313                                                        | 0.552                          | 1168.34            | 645.17             | 0.173                          | 907.92             | 156.73             |
| A_68_P31752099 | chr18:60720832-60720876                           | NM_025776:415           | Rbm22         | INSIDE                 | 0.313                                                        | 0.499                          | 1170.38            | 583.96             | 0.156                          | 907.54             | 141.52             |
| A_68_P21212090 | chr2:51004592-51004636                            | NM_028810:17            | Rnd3          | INSIDE                 | 0.313                                                        | 0.287                          | 2117.20            | 608.34             | 0.090                          | 1693.31            | 152.40             |
| A_68_P29448259 | chr14:21493732-21493776                           | NM_001168273:212        | Sec24c        | INSIDE                 | 0.313                                                        | 0.592                          | 2499.08            | 1480.28            | 0.186                          | 1952.88            | 362.43             |
| A_68_P21783956 | chr2:158440051-158440100                          | NM_009508:3582          | Slc32a1       | INSIDE                 | 0.313                                                        | 0.568                          | 940.57             | 534.46             | 0.178                          | 693.97             | 123.49             |
| A_68_P30398810 | chr15:84962157-84962201                           | NM_080470:209           | Smc1b         | INSIDE                 | 0.313                                                        | 1.612                          | 890.62             | 1435.72            | 0.504                          | 837.68             | 422.05             |
| A_68_P28137855 | chr11:112646610-112646655                         | NM_011448:3109          | Sox9          | INSIDE                 | 0.313                                                        | 1.546                          | 7635.10            | 11803.18           | 0.484                          | 5030.24            | 2436.94            |
| A_68_P24018832 | chr5:117570657-117570701                          | NM_001199685:541        | Taok3         | INSIDE                 | 0.313                                                        | 1.384                          | 2333.12            | 3228.26            | 0.433                          | 1762.46            | 763.32             |
| A_68_P27313251 | chr10:85763083-85763128                           | NM_011595:-51           | Timp3         | PROMOTER               | 0.313                                                        | 0.553                          | 2251.16            | 1244.53            | 0.173                          | 1867.17            | 322.71             |
| A_68_P27892868 | chr11:68884481-68884525                           | NM_025838:192           | Tmem107       | INSIDE                 | 0.313                                                        | 0.504                          | 1047.51            | 528.00             | 0.158                          | 754.41             | 119.00             |
| A_68_P26958515 | chr10:14425185-14425230                           | NM_025418:88            | Vta1          | INSIDE                 | 0.313                                                        | 0.701                          | 1707.62            | 1197.33            | 0.220                          | 1278.69            | 280.73             |
| A_68_P29455869 | chr14:22804369-22804413                           | NM_145459:4433          | Zfp503        | INSIDE                 | 0.313                                                        | 0.658                          | 1731.42            | 1140.05            | 0.206                          | 1176.21            | 242.46             |
| A_68_P27678670 | chr11:30168140-30168184                           | ENSMUST00000006629:7    |               | INSIDE                 | 0.313                                                        | 0.535                          | 3727.56            | 1993.03            | 0.167                          | 2695.84            | 450.61             |
| A_68_P22363031 | chr3:99045299-99045347                            | ENSMUST00000151606:1019 |               | INSIDE                 | 0.313                                                        | 0.523                          | 1039.23            | 543.46             | 0.164                          | 734.88             | 120.37             |
| A_68_P30403121 | chr15:85642175-85642219                           | NM_001164625:-69        | 2210021J22Rik | PROMOTER               | 0.312                                                        | 0.575                          | 3923.86            | 2255.17            | 0.179                          | 2919.46            | 523.95             |
| A_68_P24865610 | chr6:135148284-135148328                          | NM_028982:302           | 8430419L09Rik | INSIDE                 | 0.312                                                        | 0.588                          | 7845.62            | 4616.42            | 0.183                          | 5418.44            | 993.91             |
| A_68_P20632251 | chr1:136132200-136132244                          | NM_001039510:-214       | Adora1        | PROMOTER               | 0.312                                                        | 0.500                          | 1936.92            | 968.66             | 0.156                          | 1415.32            | 220.56             |
| A_68_P31140915 | chr17:31773909-31773953                           | NM_178224:146           | Cbs           | INSIDE                 | 0.312                                                        | 0.708                          | 2004.67            | 1420.17            | 0.221                          | 1690.64            | 373.21             |
| A_68_P31919584 | chr19:3851556-3851600                             | NM_001025566:-194       | Chka          | PROMOTER               | 0.312                                                        | 0.613                          | 1323.34            | 811.46             | 0.192                          | 939.48             | 179.98             |
| A_68_P23301437 | chr4:129985225-129985269                          | NM_010174:-775          | Fabp3         | PROMOTER               | 0.312                                                        | 0.537                          | 3055.68            | 1641.66            | 0.168                          | 2365.91            | 397.16             |
| A_68_P32215807 | chr19:58935699-58935743                           | NM_175199:-246          | Hspa12a       | PROMOTER               | 0.312                                                        | 0.612                          | 1871.08            | 1144.36            | 0.191                          | 1301.11            | 248.26             |
| A_68_P23094197 | chr4:88783582-88783626                            | NM_024433:331           | Mtap          | INSIDE                 | 0.312                                                        | 0.678                          | 1560.00            | 1057.61            | 0.212                          | 1202.35            | 254.49             |
| A_68_P29689075 | chr14:68701929-68701973                           | NM_010910:10            | Nefl          | INSIDE                 | 0.312                                                        | 0.676                          | 3074.89            | 2078.21            | 0.211                          | 2344.48            | 495.11             |
| A_68_P27567705 | chr11:6191666-6191710                             | NM_010956:89            | Ogdh          | INSIDE                 | 0.312                                                        | 0.472                          | 2945.64            | 1389.37            | 0.147                          | 2126.37            | 313.31             |



| ProbeName      | Target position of probe on CpG island microarray | TargetID               | GeneSymbol    | CpG island Description | Ratio of relative methylation (TiO <sub>2</sub> -NP/Vehicle) | Sham group                     |                    |                    | TiO <sub>2</sub> -H group      |                    |                    |
|----------------|---------------------------------------------------|------------------------|---------------|------------------------|--------------------------------------------------------------|--------------------------------|--------------------|--------------------|--------------------------------|--------------------|--------------------|
|                |                                                   |                        |               |                        |                                                              | Relative methylation (Cy5/Cy3) | Cy3 signal (Input) | Cy5 signal (MeDIP) | Relative methylation (Cy5/Cy3) | Cy3 signal (Input) | Cy5 signal (MeDIP) |
| A_68_P26381828 | chr9:28211224-28211268                            | NM_177906:612393       | Opeml         | INSIDE                 | 0.312                                                        | 0.621                          | 1967.48            | 1221.50            | 0.194                          | 1602.77            | 310.66             |
| A_68_P20350233 | chr1:74795245-74795297                            | NM_153744:259          | Prkag3        | INSIDE                 | 0.312                                                        | 1.415                          | 3788.79            | 5360.00            | 0.442                          | 2741.39            | 1211.94            |
| A_68_P21078762 | chr2:26300450-26300494                            | NM_153125:264          | Sec16a        | INSIDE                 | 0.312                                                        | 0.477                          | 1159.54            | 553.10             | 0.149                          | 797.89             | 118.81             |
| A_68_P28535335 | chr12:74154555-74154606                           | NM_009189:-6881        | Six1          | PROMOTER               | 0.312                                                        | 0.700                          | 1656.51            | 1158.88            | 0.218                          | 1212.57            | 264.27             |
| A_68_P22031733 | chr3:30992733-30992791                            | NM_001039090:-1220     | Skil          | PROMOTER               | 0.312                                                        | 0.395                          | 1342.75            | 530.78             | 0.123                          | 1018.17            | 125.63             |
| A_68_P29517796 | chr14:33276471-33276515                           | NM_021712:1544         | Slc18a3       | INSIDE                 | 0.312                                                        | 0.704                          | 4136.47            | 2914.05            | 0.220                          | 2772.07            | 609.41             |
| A_68_P31926382 | chr19:5023935-5023979                             | NM_007854:-49          | Slc29a2       | PROMOTER               | 0.312                                                        | 0.617                          | 2154.83            | 1330.51            | 0.193                          | 1509.83            | 290.69             |
| A_68_P22825735 | chr4:33296468-33296513                            | NM_177774:525          | Srsf12        | INSIDE                 | 0.312                                                        | 0.744                          | 2829.04            | 2105.95            | 0.232                          | 2326.52            | 540.72             |
| A_68_P24134128 | chr5:139676346-139676390                          | NM_024451:-255         | Sun1          | PROMOTER               | 0.312                                                        | 0.728                          | 2664.34            | 1940.32            | 0.227                          | 1851.12            | 420.40             |
| A_68_P31919105 | chr19:3768272-3768316                             | NM_001167884:874       | Suv420h1      | INSIDE                 | 0.312                                                        | 0.488                          | 1204.30            | 588.05             | 0.152                          | 1004.06            | 153.05             |
| A_68_P31213633 | chr17:47825295-47825344                           | NM_001164729:16        | Tomm6         | INSIDE                 | 0.312                                                        | 0.539                          | 1512.89            | 815.78             | 0.168                          | 1072.92            | 180.78             |
| A_68_P23269743 | chr4:124370663-124370707                          | NM_026031:114          | Utp11         | INSIDE                 | 0.312                                                        | 0.637                          | 1271.91            | 810.07             | 0.198                          | 1062.86            | 210.87             |
| A_68_P31257263 | chr17:56749175-56749221                           | NM_153152:-4           | 2410015M20Rik | DIVERGENT_PROMOTER     | 0.311                                                        | 0.650                          | 880.87             | 572.13             | 0.202                          | 647.21             | 130.60             |
| A_68_P25050066 | chr7:36371059-36371104                            | NM_178263:-184         | Ankrd27       | DIVERGENT_PROMOTER     | 0.311                                                        | 0.585                          | 2004.59            | 1171.95            | 0.182                          | 1608.09            | 292.19             |
| A_68_P24992859 | chr7:19945635-19945679                            | NM_145822:-824         | Cd3eap        | DIVERGENT_PROMOTER     | 0.311                                                        | 0.402                          | 3657.03            | 1470.39            | 0.125                          | 2771.27            | 346.17             |
| A_68_P26240285 | chr8:126038733-126038778                          | NM_001170976:600       | Dbdd1         | INSIDE                 | 0.311                                                        | 0.647                          | 2796.26            | 1808.64            | 0.201                          | 2111.46            | 424.65             |
| A_68_P23471509 | chr5:9160963-9161011                              | NM_001110327:790       | Dmtf1         | INSIDE                 | 0.311                                                        | 0.645                          | 1452.99            | 937.24             | 0.201                          | 1079.13            | 216.46             |
| A_68_P31258228 | chr17:56904354-56904398                           | NM_144858:203          | Dus31         | INSIDE                 | 0.311                                                        | 0.621                          | 1871.83            | 1163.03            | 0.193                          | 1359.56            | 262.92             |
| A_68_P32242175 | chrX:7769957-7770003                              | NM_007898:658          | Ebp           | INSIDE                 | 0.311                                                        | 0.625                          | 1578.04            | 986.37             | 0.195                          | 626.18             | 121.86             |
| A_68_P22071595 | chr3:38784639-38784683                            | NM_183221:-1201        | Fat4          | PROMOTER               | 0.311                                                        | 0.651                          | 2694.91            | 1753.61            | 0.202                          | 1968.38            | 398.25             |
| A_68_P28419966 | chr12:50486205-50486249                           | NM_008241:2233         | Foxg1         | INSIDE                 | 0.311                                                        | 0.427                          | 1752.30            | 747.96             | 0.133                          | 1278.08            | 169.42             |
| A_68_P20714215 | chr1:153191431-153191475                          | NM_001039511:-175      | Ivns1labp     | PROMOTER               | 0.311                                                        | 0.459                          | 2192.95            | 1006.86            | 0.143                          | 1657.53            | 236.40             |
| A_68_P29668831 | chr14:65271409-65271453                           | NM_001081177:63        | Kif13b        | INSIDE                 | 0.311                                                        | 0.676                          | 1231.23            | 832.23             | 0.210                          | 936.30             | 196.54             |
| A_68_P29581489 | chr14:47917977-47918021                           | NM_178684:10           | Mapk1ip11     | INSIDE                 | 0.311                                                        | 0.520                          | 1302.58            | 676.73             | 0.161                          | 1067.60            | 172.28             |
| A_68_P29589383 | chr14:49284720-49284764                           | NM_144841:-2195        | Otx2          | DIVERGENT_PROMOTER     | 0.311                                                        | 0.452                          | 2371.68            | 1071.39            | 0.141                          | 1728.89            | 243.22             |
| A_68_P22031194 | chr3:30894990-30895034                            | NM_008857:320          | Prkci         | INSIDE                 | 0.311                                                        | 0.483                          | 2784.80            | 1344.04            | 0.150                          | 2328.63            | 348.98             |
| A_68_P20138944 | chr1:34516811-34516856                            | NM_011206:243          | Ptpn18        | INSIDE                 | 0.311                                                        | 0.497                          | 2255.29            | 1121.63            | 0.155                          | 1747.96            | 270.79             |
| A_68_P31306702 | chr17:66868481-66868525                           | NM_024448:508          | Rab12         | INSIDE                 | 0.311                                                        | 0.641                          | 2832.09            | 1816.20            | 0.199                          | 2142.21            | 426.63             |
| A_68_P28059598 | chr11:98821127-98821171                           | NM_001176528:-636      | Rara          | PROMOTER               | 0.311                                                        | 0.634                          | 1923.06            | 1218.81            | 0.197                          | 1477.29            | 291.35             |
| A_68_P32289235 | chrX:20194111-20194155                            | NM_001167775:-496      | Rbm10         | PROMOTER               | 0.311                                                        | 1.498                          | 1293.19            | 1937.09            | 0.466                          | 657.26             | 305.99             |
| A_68_P27807843 | chr11:53841465-53841509                           | NM_019687:106          | Slc22a4       | INSIDE                 | 0.311                                                        | 0.656                          | 1669.02            | 1095.08            | 0.204                          | 1261.63            | 257.68             |
| A_68_P23309110 | chr4:131476820-131476864                          | NM_001201367:-843      | Tmem200b      | PROMOTER               | 0.311                                                        | 0.637                          | 1115.05            | 710.08             | 0.198                          | 968.65             | 191.54             |
| A_68_P32092598 | chr19:36979096-36979151                           |                        |               | Unknown                | 0.311                                                        | 0.668                          | 880.49             | 588.38             | 0.208                          | 684.39             | 142.39             |
| A_68_P24636065 | chr6:90937787-90937831                            |                        |               | Unknown                | 0.311                                                        | 0.571                          | 1217.42            | 694.78             | 0.178                          | 949.28             | 168.57             |
| A_68_P24043269 | chr5:121670850-121670896                          | ENSMUST00000119892:645 |               | INSIDE                 | 0.311                                                        | 0.642                          | 1095.95            | 703.32             | 0.200                          | 942.40             | 188.04             |
| A_68_P23720350 | chr5:58108862-58108920                            | NR_015588:268          | 4932441J04Rik | INSIDE                 | 0.310                                                        | 0.437                          | 1280.56            | 560.18             | 0.136                          | 858.56             | 116.48             |
| A_68_P25435064 | chr7:121397732-121397776                          | NM_033370:440          | Copb1         | INSIDE                 | 0.310                                                        | 0.674                          | 942.61             | 635.01             | 0.209                          | 784.38             | 164.07             |
| A_68_P32031152 | chr19:25747038-25747084                           | NM_145831:160          | Dmrt2         | INSIDE                 | 0.310                                                        | 0.686                          | 1388.95            | 952.80             | 0.213                          | 1035.27            | 220.16             |
| A_68_P31130151 | chr17:29979095-29979139                           | NM_001081160:45711     | Mdga1         | INSIDE                 | 0.310                                                        | 0.737                          | 3923.97            | 2892.50            | 0.228                          | 2840.85            | 649.04             |
| A_68_P29330079 | chr13:112477883-112477927                         | NM_172593:1519         | Mier3         | INSIDE                 | 0.310                                                        | 0.295                          | 2250.96            | 664.54             | 0.092                          | 1566.96            | 143.38             |
| A_68_P31552999 | chr18:23198421-23198469                           | NM_001161483:-1280     | Nol4          | PROMOTER               | 0.310                                                        | 0.584                          | 900.37             | 526.13             | 0.181                          | 656.88             | 119.04             |
| A_68_P31295073 | chr17:64681710-64681754                           | NM_001025309:-509      | Pja2          | PROMOTER               | 0.310                                                        | 0.447                          | 1995.51            | 892.86             | 0.139                          | 1482.72            | 205.45             |
| A_68_P21110488 | chr2:31509792-31509836                            | NM_001123362:14258     | Prdm12        | INSIDE                 | 0.310                                                        | 0.686                          | 2682.89            | 1840.93            | 0.213                          | 2519.68            | 535.54             |
| A_68_P28137854 | chr11:112646538-112646582                         | NM_011448:3037         | Sox9          | INSIDE                 | 0.310                                                        | 1.454                          | 16942.70           | 24640.93           | 0.451                          | 11286.38           | 5085.82            |
| A_68_P23265704 | chr4:123668100-123668144                          |                        |               | Unknown                | 0.310                                                        | 0.615                          | 1201.34            | 739.05             | 0.191                          | 965.10             | 184.15             |
| A_68_P32050338 | chr19:29038878-29038922                           | NM_198651:-256         | 4430402118Rik | PROMOTER               | 0.309                                                        | 0.540                          | 1263.74            | 682.01             | 0.167                          | 1227.41            | 204.57             |
| A_68_P28078752 | chr11:102158739-102158784                         | NM_001098836:-818      | Atxn7l3       | PROMOTER               | 0.309                                                        | 0.699                          | 1648.75            | 1152.08            | 0.216                          | 1189.68            | 256.68             |
| A_68_P25354426 | chr7:105342464-105342508                          | NM_001081167:5499      | B3gnt6        | INSIDE                 | 0.309                                                        | 0.544                          | 1800.99            | 980.45             | 0.168                          | 1510.86            | 254.19             |
| A_68_P23930021 | chr5:100947315-100947359                          | NM_012001:9            | Cops4         | INSIDE                 | 0.309                                                        | 0.492                          | 1167.19            | 573.85             | 0.152                          | 881.98             | 133.94             |
| A_68_P31458279 | chr18:3383133-3383177                             | NM_029402:-68          | Cul2          | PROMOTER               | 0.309                                                        | 0.489                          | 1043.64            | 510.51             | 0.151                          | 794.34             | 119.90             |
| A_68_P28552887 | chr12:77356011-77356057                           | NM_138745:-184         | Mthfd1        | DIVERGENT_PROMOTER     | 0.309                                                        | 0.550                          | 1015.45            | 558.66             | 0.170                          | 708.43             | 120.50             |

| ProbeName      | Target position of probe on CpG island microarray | TargetID               | GeneSymbol    | CpG island Description | Ratio of relative methylation (TiO <sub>2</sub> -NP/Vehicle) | Sham group                     |                    |                    | TiO <sub>2</sub> -H group      |                    |                    |
|----------------|---------------------------------------------------|------------------------|---------------|------------------------|--------------------------------------------------------------|--------------------------------|--------------------|--------------------|--------------------------------|--------------------|--------------------|
|                |                                                   |                        |               |                        |                                                              | Relative methylation (Cy5/Cy3) | Cy3 signal (Input) | Cy5 signal (MeDIP) | Relative methylation (Cy5/Cy3) | Cy3 signal (Input) | Cy5 signal (MeDIP) |
| A_68_P25098703 | chr7:53632108-53632154                            | NM_010866:287          | Myod1         | INSIDE                 | 0.309                                                        | 0.465                          | 1338.94            | 623.18             | 0.144                          | 922.48             | 132.79             |
| A_68_P26293544 | chr9:8900444-8900488                              | NM_008829:634          | Pgr           | INSIDE                 | 0.309                                                        | 0.392                          | 1565.31            | 613.31             | 0.121                          | 1155.13            | 139.75             |
| A_68_P26469278 | chr9:44541688-44541732                            | NM_153537:1567         | Phldb1        | INSIDE                 | 0.309                                                        | 1.578                          | 1314.26            | 2074.23            | 0.488                          | 966.00             | 471.28             |
| A_68_P23801769 | chr5:74591333-74591377                            | NM_026878:4            | Rasl11b       | INSIDE                 | 0.309                                                        | 0.462                          | 1675.56            | 773.71             | 0.143                          | 1358.00            | 194.04             |
| A_68_P32415814 | chrX:58147306-58147350                            | NM_009237:-723         | Sox3          | PROMOTER               | 0.309                                                        | 1.551                          | 3090.46            | 4792.71            | 0.479                          | 1344.24            | 644.52             |
| A_68_P31106579 | chr17:25969550-25969594                           | NM_019719:734          | Stub1         | INSIDE                 | 0.309                                                        | 0.732                          | 2880.62            | 2110.02            | 0.227                          | 2057.03            | 466.08             |
| A_68_P24994888 | chr7:20300800-20300844                            | NM_001109748:-44       | Tomm40        | PROMOTER               | 0.309                                                        | 0.703                          | 2686.35            | 1888.44            | 0.217                          | 1825.38            | 396.24             |
| A_68_P26132557 | chr8:107783610-107783659                          | NM_001033161:4860      | Tradd         | INSIDE                 | 0.309                                                        | 0.384                          | 1335.67            | 513.41             | 0.119                          | 1041.01            | 123.64             |
| A_68_P29102454 | chr13:65343704-65343748                           |                        |               | Unknown                | 0.309                                                        | 1.347                          | 2034.77            | 2740.19            | 0.416                          | 1629.31            | 678.44             |
| A_68_P28182349 | chr11:119960272-119960316                         | NM_001110242:47        | 1810043H04Rik | INSIDE                 | 0.308                                                        | 0.394                          | 1425.75            | 561.74             | 0.121                          | 1015.23            | 123.11             |
| A_68_P28755050 | chr12:114394591-114394636                         | NM_134041:-18          | 4930427A07Rik | PROMOTER               | 0.308                                                        | 0.424                          | 2383.78            | 1010.51            | 0.131                          | 1862.38            | 243.31             |
| A_68_P22522754 | chr3:129604639-129604686                          | NM_009811:320          | Casp6         | INSIDE                 | 0.308                                                        | 0.684                          | 1224.78            | 837.20             | 0.210                          | 872.90             | 183.60             |
| A_68_P21821717 | chr2:164938019-164938063                          | NM_174988:122197       | Cdh22         | INSIDE                 | 0.308                                                        | 0.461                          | 1976.94            | 910.90             | 0.142                          | 1492.14            | 211.67             |
| A_68_P24141318 | chr5:140895750-140895794                          | NM_133916:514          | Eif3b         | INSIDE                 | 0.308                                                        | 0.711                          | 1372.71            | 975.79             | 0.219                          | 1101.52            | 241.33             |
| A_68_P28158771 | chr11:116195721-116195765                         | NM_008240:926          | Foxj1         | INSIDE                 | 0.308                                                        | 0.423                          | 1299.01            | 549.84             | 0.130                          | 965.13             | 125.85             |
| A_68_P31493068 | chr18:11055096-11055140                           | NM_010258:2611         | Gata6         | INSIDE                 | 0.308                                                        | 0.658                          | 1794.84            | 1180.78            | 0.203                          | 1390.45            | 281.95             |
| A_68_P28842019 | chr13:15554706-15554754                           | NM_008130:-825         | Gli3          | PROMOTER               | 0.308                                                        | 0.622                          | 874.17             | 544.10             | 0.191                          | 729.07             | 139.60             |
| A_68_P30446028 | chr15:93106155-93106199                           | NM_001033275:-661      | Gxylt1        | PROMOTER               | 0.308                                                        | 0.455                          | 1295.48            | 589.24             | 0.140                          | 915.10             | 128.11             |
| A_68_P25186204 | chr7:73224455-73224499                            | NM_024439:-58          | H47           | PROMOTER               | 0.308                                                        | 0.449                          | 1540.45            | 691.17             | 0.138                          | 1180.55            | 163.11             |
| A_68_P20864304 | chr1:180459747-180459791                          | NM_001161665:513       | Kif26b        | PROMOTER               | 0.308                                                        | 0.641                          | 2569.97            | 1646.84            | 0.197                          | 1831.57            | 361.10             |
| A_68_P25187992 | chr7:73532448-73532492                            | NM_146191:757          | Lrrk1         | INSIDE                 | 0.308                                                        | 0.500                          | 1378.83            | 690.10             | 0.154                          | 1171.14            | 180.40             |
| A_68_P28184854 | chr11:120345796-120345840                         | NM_027204:-164         | Mrp12         | PROMOTER               | 0.308                                                        | 0.415                          | 1306.21            | 542.07             | 0.128                          | 973.52             | 124.46             |
| A_68_P32181743 | chr19:53388066-53388111                           | NM_001008542:3093      | Mxi1          | INSIDE                 | 0.308                                                        | 0.429                          | 1821.72            | 781.42             | 0.132                          | 1669.23            | 220.66             |
| A_68_P23185680 | chr4:106323776-106323820                          | NM_001083887:125       | Pars2         | INSIDE                 | 0.308                                                        | 0.455                          | 3076.60            | 1399.50            | 0.140                          | 2264.92            | 317.68             |
| A_68_P27551111 | chr11:3188684-3188734                             | NM_019574:-1751        | Patz1         | PROMOTER               | 0.308                                                        | 0.466                          | 1570.97            | 731.51             | 0.143                          | 1116.85            | 160.23             |
| A_68_P24541329 | chr6:72312280-72312324                            | NM_025607:73           | Rnf181        | INSIDE                 | 0.308                                                        | 0.662                          | 938.17             | 621.52             | 0.204                          | 767.13             | 156.66             |
| A_68_P30382206 | chr15:82054633-82054677                           | NM_028075:112          | Tnfrsf13c     | INSIDE                 | 0.308                                                        | 0.409                          | 1535.29            | 628.63             | 0.126                          | 1098.26            | 138.39             |
| A_68_P26023338 | chr8:87561856-87561900                            | NM_001122843:812       | Tnpo2         | INSIDE                 | 0.308                                                        | 0.563                          | 1020.00            | 574.25             | 0.173                          | 736.69             | 127.64             |
| A_68_P24374361 | chr6:37820805-37820849                            | NM_145076:16           | Trim24        | INSIDE                 | 0.308                                                        | 0.697                          | 3366.12            | 2345.10            | 0.215                          | 2760.08            | 592.80             |
| A_68_P27589658 | chr11:11016375-11016419                           | NM_177033:2378         | Vwec2         | INSIDE                 | 0.308                                                        | 0.325                          | 1628.81            | 529.54             | 0.100                          | 1221.17            | 122.11             |
| A_68_P28813401 | chr13:8870209-8870253                             | NM_172445:58           | Wdr37         | INSIDE                 | 0.308                                                        | 0.697                          | 4478.10            | 3121.35            | 0.215                          | 3238.33            | 695.05             |
| A_68_P23429335 | chr4:153515771-153515815                          | NM_021499:-688         | Wdr8          | DIVERGENT_PROMOTER     | 0.308                                                        | 0.637                          | 2009.41            | 1280.38            | 0.196                          | 1424.96            | 279.41             |
| A_68_P21143635 | chr2:37558051-37558095                            | ENSMUST00000144206:597 |               | INSIDE                 | 0.308                                                        | 1.781                          | 4117.06            | 7332.92            | 0.548                          | 2926.22            | 1604.18            |
| A_68_P26870853 | chr9:119066197-119066250                          | NM_146230:-12          | Acaa1b        | PROMOTER               | 0.307                                                        | 0.623                          | 1274.20            | 793.86             | 0.191                          | 1075.27            | 205.65             |
| A_68_P27560710 | chr11:4887330-4887374                             | NM_007454:445          | Ap1b1         | INSIDE                 | 0.307                                                        | 0.582                          | 2095.62            | 1219.07            | 0.178                          | 1429.47            | 255.06             |
| A_68_P25370485 | chr7:108080406-108080454                          | NM_001081116:245       | Arhgef17      | INSIDE                 | 0.307                                                        | 0.324                          | 1617.44            | 524.46             | 0.099                          | 1238.33            | 123.19             |
| A_68_P26544131 | chr9:57684762-57684806                            | NM_019689:-2743        | Arid3b        | PROMOTER               | 0.307                                                        | 0.536                          | 1084.24            | 580.89             | 0.164                          | 755.43             | 124.08             |
| A_68_P31066946 | chr17:15842783-15842827                           | NM_007690:874          | Chd1          | INSIDE                 | 0.307                                                        | 0.495                          | 2613.42            | 1292.57            | 0.152                          | 1867.71            | 283.26             |
| A_68_P27990834 | chr11:86571018-86571062                           | NM_001003908:-46       | Ctce          | PROMOTER               | 0.307                                                        | 0.544                          | 3606.28            | 1963.38            | 0.167                          | 2688.21            | 449.14             |
| A_68_P28266976 | chr12:16818150-16818194                           | NM_033270:402          | E2f6          | INSIDE                 | 0.307                                                        | 0.572                          | 2104.39            | 1204.19            | 0.176                          | 1746.15            | 306.56             |
| A_68_P29699029 | chr14:70478786-70478830                           | NM_018781:1557         | Egr3          | INSIDE                 | 0.307                                                        | 0.538                          | 1017.69            | 547.72             | 0.165                          | 699.15             | 115.53             |
| A_68_P30328924 | chr15:73014625-73014669                           | NM_153178:731          | Eif2c2        | INSIDE                 | 0.307                                                        | 0.542                          | 1536.65            | 832.16             | 0.166                          | 1283.33            | 213.28             |
| A_68_P25957752 | chr8:74126620-74126664                            | NM_001166213:5098      | Fam129c       | INSIDE                 | 0.307                                                        | 0.565                          | 1846.74            | 1043.92            | 0.174                          | 1386.55            | 240.96             |
| A_68_P25508346 | chr7:135110839-135110887                          | NM_139149:-130         | Fus           | PROMOTER               | 0.307                                                        | 0.360                          | 1514.75            | 544.96             | 0.111                          | 1206.26            | 133.34             |
| A_68_P27543986 | chr10:128371189-128371233                         | NM_008398:342          | Irga7         | INSIDE                 | 0.307                                                        | 0.442                          | 2370.25            | 1048.13            | 0.136                          | 1812.84            | 246.01             |
| A_68_P31093374 | chr17:23879287-23879335                           | NM_028416:3486         | Kremen2       | INSIDE                 | 0.307                                                        | 1.442                          | 1137.02            | 1639.25            | 0.442                          | 749.28             | 331.12             |
| A_68_P31259252 | chr17:57075335-57075382                           | NM_022328:-547         | Mllt1         | PROMOTER               | 0.307                                                        | 0.600                          | 906.69             | 544.44             | 0.184                          | 647.94             | 119.41             |
| A_68_P29448044 | chr14:21459988-21460032                           | NM_021508:15752        | Myoz1         | DOWNSTREAM             | 0.307                                                        | 0.627                          | 2642.88            | 1657.82            | 0.193                          | 2136.78            | 411.42             |
| A_68_P31920554 | chr19:4000379-4000423                             | NM_025529:-179         | Nudt8         | PROMOTER               | 0.307                                                        | 0.519                          | 1609.25            | 834.54             | 0.159                          | 1305.69            | 207.58             |
| A_68_P32099497 | chr19:38171760-38171804                           | NM_181748:214          | O3far1        | INSIDE                 | 0.307                                                        | 0.500                          | 1215.27            | 607.68             | 0.153                          | 973.89             | 149.46             |
| A_68_P22271765 | chr3:80840549-80840593                            | NM_019971:233          | Pdgfc         | INSIDE                 | 0.307                                                        | 0.655                          | 4758.85            | 3117.57            | 0.201                          | 4044.76            | 812.21             |

| ProbeName      | Target position of probe on CpG island microarray | TargetID               | GeneSymbol    | CpG island Description | Ratio of relative methylation (TiO <sub>2</sub> -NP/Vehicle) | Sham group                     |                    |                    | TiO <sub>2</sub> -H group      |                    |                    |
|----------------|---------------------------------------------------|------------------------|---------------|------------------------|--------------------------------------------------------------|--------------------------------|--------------------|--------------------|--------------------------------|--------------------|--------------------|
|                |                                                   |                        |               |                        |                                                              | Relative methylation (Cy5/Cy3) | Cy3 signal (Input) | Cy5 signal (MeDIP) | Relative methylation (Cy5/Cy3) | Cy3 signal (Input) | Cy5 signal (MeDIP) |
| A_68_P32760541 | chrX:152057603-152057648                          | NM_001093750:245       | Ptchd1        | INSIDE                 | 0.307                                                        | 1.655                          | 2211.33            | 3659.14            | 0.508                          | 896.80             | 455.50             |
| A_68_P21085998 | chr2:27532103-27532149                            | NM_011305:-594         | Rxra          | PROMOTER               | 0.307                                                        | 0.619                          | 1738.58            | 1075.62            | 0.190                          | 1309.57            | 248.37             |
| A_68_P23441761 | chr4:155367293-155367337                          | NM_011341:292          | Sdf4          | INSIDE                 | 0.307                                                        | 0.477                          | 1271.30            | 606.18             | 0.146                          | 983.95             | 143.92             |
| A_68_P25269485 | chr7:88092809-88092853                            | NM_019951:-394         | Sec11a        | PROMOTER               | 0.307                                                        | 0.634                          | 826.34             | 523.49             | 0.194                          | 636.34             | 123.60             |
| A_68_P20149046 | chr1:36613936-36613984                            | NM_001126047:1266      | Sema4c        | INSIDE                 | 0.307                                                        | 0.465                          | 1165.59            | 542.06             | 0.143                          | 881.56             | 125.81             |
| A_68_P21101103 | chr2:29918555-29918605                            | NM_001204875:-3413     | Set           | PROMOTER               | 0.307                                                        | 0.409                          | 1398.57            | 572.36             | 0.125                          | 1078.77            | 135.35             |
| A_68_P20870655 | chr1:181447900-181447944                          | NM_027188:212          | Smyd3         | INSIDE                 | 0.307                                                        | 0.486                          | 1813.14            | 881.71             | 0.149                          | 1454.39            | 216.91             |
| A_68_P27098028 | chr10:42740979-42741023                           | NM_175407:153336       | Sobp          | INSIDE                 | 0.307                                                        | 0.630                          | 2639.78            | 1664.18            | 0.194                          | 2234.42            | 432.43             |
| A_68_P24035159 | chr5:120317204-120317248                          | NM_011537:32555        | Tbx5          | INSIDE                 | 0.307                                                        | 1.519                          | 3033.48            | 4606.35            | 0.467                          | 1973.23            | 920.98             |
| A_68_P30255522 | chr15:59481111-59481155                           | NM_144549:924          | Trib1         | INSIDE                 | 0.307                                                        | 0.739                          | 3058.17            | 2261.46            | 0.227                          | 2131.78            | 483.22             |
| A_68_P27269296 | chr10:77085151-77085195                           | NM_019803:107          | Ube2g2        | INSIDE                 | 0.307                                                        | 0.484                          | 1202.52            | 581.61             | 0.149                          | 974.75             | 144.97             |
| A_68_P30084537 | chr15:25913916-25913960                           | NM_144523:-182         | Zfp622        | PROMOTER               | 0.307                                                        | 0.740                          | 3944.02            | 2917.47            | 0.227                          | 2881.16            | 654.34             |
| A_68_P20530740 | chr1:114313184-114313228                          |                        | Unknown       |                        | 0.307                                                        | 0.555                          | 1632.89            | 905.74             | 0.170                          | 1256.17            | 213.62             |
| A_68_P25827279 | chr8:46020486-46020530                            | AK079043:5             |               | INSIDE                 | 0.307                                                        | 0.687                          | 1241.64            | 853.48             | 0.211                          | 1006.72            | 212.50             |
| A_68_P21108246 | chr2:31170158-31170202                            | ENSMUST00000113532:246 |               | INSIDE                 | 0.307                                                        | 0.715                          | 3203.40            | 2289.58            | 0.220                          | 2583.71            | 567.62             |
| A_68_P29448465 | chr14:21522444-21522488                           | NR_029446:-145         | 6230400D17Rik | PROMOTER               | 0.306                                                        | 0.636                          | 1615.46            | 1028.01            | 0.195                          | 1214.50            | 236.56             |
| A_68_P24383758 | chr6:39523742-39523792                            | NM_178873:-108         | Adck2         | PROMOTER               | 0.306                                                        | 0.501                          | 1030.05            | 515.84             | 0.153                          | 804.15             | 123.34             |
| A_68_P22312956 | chr3:88101171-88101215                            | NM_009836:136          | Cet3          | INSIDE                 | 0.306                                                        | 0.528                          | 1948.15            | 1028.32            | 0.162                          | 1464.90            | 236.89             |
| A_68_P26363205 | chr9:18096816-18096860                            | NM_025844:128          | Chordc1       | INSIDE                 | 0.306                                                        | 0.710                          | 1483.02            | 1053.65            | 0.217                          | 1106.17            | 240.51             |
| A_68_P28143204 | chr11:113511459-113511505                         | NM_013581:640          | Cog1          | INSIDE                 | 0.306                                                        | 0.631                          | 855.45             | 539.61             | 0.193                          | 733.34             | 141.68             |
| A_68_P24008813 | chr5:115729847-115729891                          | NM_026504:158          | Coq5          | INSIDE                 | 0.306                                                        | 0.650                          | 876.70             | 569.85             | 0.199                          | 685.97             | 136.62             |
| A_68_P26665914 | chr9:79607348-79607392                            | NM_009945:290          | Cox7a2        | INSIDE                 | 0.306                                                        | 0.600                          | 2208.00            | 1325.14            | 0.183                          | 1604.11            | 294.20             |
| A_68_P20416436 | chr1:89110508-89110552                            | NM_001039169:17        | Eif4e2        | INSIDE                 | 0.306                                                        | 0.609                          | 1179.37            | 718.03             | 0.187                          | 960.07             | 179.11             |
| A_68_P30361561 | chr15:78503090-78503140                           | NM_183141:45429        | Efn2          | INSIDE                 | 0.306                                                        | 1.438                          | 1384.09            | 1990.61            | 0.441                          | 1048.42            | 461.94             |
| A_68_P29448412 | chr14:21515116-21515167                           | NM_028428:952          | Fut11         | INSIDE                 | 0.306                                                        | 0.604                          | 948.23             | 572.44             | 0.185                          | 646.75             | 119.45             |
| A_68_P31123144 | chr17:28712407-28712451                           | NM_026571:-235         | Lhfp15        | PROMOTER               | 0.306                                                        | 0.555                          | 1443.17            | 800.38             | 0.170                          | 1195.70            | 202.74             |
| A_68_P21794488 | chr2:160191953-160191997                          | NM_010658:827          | Matf          | INSIDE                 | 0.306                                                        | 0.551                          | 2432.00            | 1340.48            | 0.168                          | 1838.20            | 309.53             |
| A_68_P27287421 | chr10:80568903-80568947                           | NM_023138:233          | Map2k2        | INSIDE                 | 0.306                                                        | 0.460                          | 1148.19            | 528.02             | 0.141                          | 830.12             | 116.64             |
| A_68_P28103510 | chr11:106648827-106648871                         | NR_037224:-4775        | Mir3064       | PROMOTER               | 0.306                                                        | 0.692                          | 3660.83            | 2533.29            | 0.211                          | 2637.22            | 557.72             |
| A_68_P31055439 | chr17:13108867-13108911                           | NM_026310:69           | Mprl18        | INSIDE                 | 0.306                                                        | 0.391                          | 1728.34            | 675.39             | 0.119                          | 1306.05            | 155.93             |
| A_68_P24815139 | chr6:124364839-124364883                          | NM_008995:225          | Pex5          | INSIDE                 | 0.306                                                        | 0.508                          | 4295.46            | 2180.83            | 0.156                          | 3282.57            | 510.53             |
| A_68_P31655265 | chr18:42554339-42554383                           | NM_138945:110          | Pou4f3        | INSIDE                 | 0.306                                                        | 0.476                          | 4057.89            | 1932.58            | 0.146                          | 2789.92            | 406.78             |
| A_68_P21142186 | chr2:37308087-37308131                            | NM_001033960:335       | Rabgap1       | INSIDE                 | 0.306                                                        | 0.685                          | 1593.12            | 1091.59            | 0.209                          | 1255.07            | 262.75             |
| A_68_P20166592 | chr1:39633542-39633586                            | NM_001033135:628       | Rnf149        | INSIDE                 | 0.306                                                        | 0.477                          | 1657.94            | 791.46             | 0.146                          | 1444.19            | 210.71             |
| A_68_P27940386 | chr11:77745058-77745102                           | NM_021286:636          | Sez6          | INSIDE                 | 0.306                                                        | 0.543                          | 1094.97            | 595.09             | 0.166                          | 867.73             | 144.19             |
| A_68_P23767118 | chr5:67698039-67698083                            | NM_178651:-135         | Slc30a9       | PROMOTER               | 0.306                                                        | 0.696                          | 2507.38            | 1744.43            | 0.213                          | 1754.00            | 372.85             |
| A_68_P28168277 | chr11:117829266-117829310                         | NM_007707:1392         | Socs3         | INSIDE                 | 0.306                                                        | 0.439                          | 1397.72            | 613.99             | 0.134                          | 1080.52            | 145.26             |
| A_68_P28750631 | chr12:113749099-113749143                         | NM_178915:251          | Tmem179       | INSIDE                 | 0.306                                                        | 0.671                          | 1006.20            | 675.06             | 0.205                          | 723.82             | 148.36             |
| A_68_P24459339 | chr6:53768981-53769025                            | NM_025817:1817         | Tril          | INSIDE                 | 0.306                                                        | 0.465                          | 1127.31            | 524.46             | 0.142                          | 852.50             | 121.18             |
| A_68_P22168174 | chr3:58220683-58220727                            | NM_001081229:1094      | Tsc22d2       | INSIDE                 | 0.306                                                        | 0.620                          | 1368.55            | 849.10             | 0.190                          | 1397.48            | 265.58             |
| A_68_P27513158 | chr10:122634206-122634250                         | NM_027604:-249         | Usp15         | PROMOTER               | 0.306                                                        | 0.705                          | 4044.48            | 2850.09            | 0.216                          | 3043.05            | 657.08             |
| A_68_P25210203 | chr7:77425760-77425806                            | AK148659:-1137         |               | PROMOTER               | 0.306                                                        | 0.698                          | 1224.03            | 854.80             | 0.213                          | 950.53             | 202.80             |
| A_68_P23294134 | chr4:128639387-128639431                          | NM_172875:253          | Adc           | INSIDE                 | 0.305                                                        | 0.550                          | 936.37             | 514.76             | 0.168                          | 720.57             | 120.90             |
| A_68_P23882634 | chr5:90794262-90794306                            | NM_030886:927          | Ankrd17       | INSIDE                 | 0.305                                                        | 0.569                          | 5428.97            | 3088.89            | 0.173                          | 3740.49            | 648.30             |
| A_68_P26140015 | chr8:109035666-109035710                          | NM_001037809:876       | Cdh3          | INSIDE                 | 0.305                                                        | 0.590                          | 1353.51            | 798.17             | 0.180                          | 1129.42            | 203.15             |
| A_68_P21761660 | chr2:154483260-154483304                          | NM_029362:521          | Chmp4b        | INSIDE                 | 0.305                                                        | 0.566                          | 1615.67            | 914.49             | 0.173                          | 1097.06            | 189.28             |
| A_68_P31110712 | chr17:26645159-26645203                           | NM_013642:237          | Dusp1         | INSIDE                 | 0.305                                                        | 0.685                          | 1711.07            | 1171.73            | 0.209                          | 1326.08            | 277.13             |
| A_68_P20416756 | chr1:89160739-89160787                            | NM_028889:-176         | Efh1          | PROMOTER               | 0.305                                                        | 0.479                          | 1156.38            | 553.94             | 0.146                          | 810.92             | 118.64             |
| A_68_P23269774 | chr4:124377782-124377826                          | NM_010213:-138         | Fhl3          | DIVERGENT_PROMOTER     | 0.305                                                        | 0.537                          | 3301.51            | 1771.42            | 0.163                          | 2410.10            | 393.97             |
| A_68_P24002949 | chr5:114724178-114724222                          | NM_148935:-430         | Foxn4         | PROMOTER               | 0.305                                                        | 0.583                          | 2697.56            | 1572.79            | 0.178                          | 1877.98            | 334.28             |
| A_68_P22248622 | chr3:75760179-75760223                            | NM_175193:553          | Golm4         | INSIDE                 | 0.305                                                        | 0.480                          | 1318.91            | 632.79             | 0.146                          | 1007.44            | 147.25             |

| ProbeName      | Target position of probe on CpG island microarray | TargetID                | GeneSymbol    | CpG island Description | Ratio of relative methylation (TiO <sub>2</sub> -NP/Vehicle) | Sham group                     |                    |                    | TiO <sub>2</sub> -H group      |                    |                    |
|----------------|---------------------------------------------------|-------------------------|---------------|------------------------|--------------------------------------------------------------|--------------------------------|--------------------|--------------------|--------------------------------|--------------------|--------------------|
|                |                                                   |                         |               |                        |                                                              | Relative methylation (Cy5/Cy3) | Cy3 signal (Input) | Cy5 signal (MeDIP) | Relative methylation (Cy5/Cy3) | Cy3 signal (Input) | Cy5 signal (MeDIP) |
| A_68_P32399258 | chrX:54306421-54306465                            | NM_028242:-304          | Htatsf1       | PROMOTER               | 0.305                                                        | 1.509                          | 1586.32            | 2393.78            | 0.460                          | 638.68             | 293.87             |
| A_68_P24591139 | chr6:83004504-83004548                            | NM_019752:39            | Htra2         | INSIDE                 | 0.305                                                        | 0.427                          | 1777.44            | 759.46             | 0.130                          | 1307.76            | 170.57             |
| A_68_P20391714 | chr1:82287221-82287265                            | NM_010570:772           | Irs1          | INSIDE                 | 0.305                                                        | 0.492                          | 1356.43            | 668.02             | 0.150                          | 930.38             | 139.95             |
| A_68_P32136346 | chr19:45154510-45154554                           | NM_178929:3904          | Kazald1       | DOWNSTREAM             | 0.305                                                        | 0.521                          | 983.17             | 512.38             | 0.159                          | 772.46             | 122.97             |
| A_68_P25503740 | chr7:134185787-134185831                          | NM_145588:126           | Kif22         | INSIDE                 | 0.305                                                        | 0.638                          | 1173.06            | 748.72             | 0.195                          | 861.63             | 167.91             |
| A_68_P20864291 | chr1:180458344-180458388                          | NM_001161665:-889       | Kif26b        | PROMOTER               | 0.305                                                        | 0.559                          | 3546.14            | 1982.41            | 0.171                          | 2609.64            | 445.47             |
| A_68_P24817385 | chr6:124807053-124807099                          | NM_013534:629           | Leprel2       | INSIDE                 | 0.305                                                        | 0.543                          | 992.44             | 539.18             | 0.165                          | 751.11             | 124.31             |
| A_68_P24563510 | chr6:77193700-77193744                            | NM_028880:1012          | Lrrtm1        | INSIDE                 | 0.305                                                        | 0.625                          | 2735.05            | 1709.24            | 0.191                          | 2116.18            | 403.91             |
| A_68_P25954146 | chr8:73321652-73321696                            | NM_199308:-5342         | Mast3         | PROMOTER               | 0.305                                                        | 0.487                          | 1954.75            | 951.25             | 0.148                          | 1418.66            | 210.64             |
| A_68_P21099803 | chr2:29701365-29701409                            | NR_029838:-139          | Mir219-2      | PROMOTER               | 0.305                                                        | 0.588                          | 2024.15            | 1190.18            | 0.179                          | 1455.66            | 260.99             |
| A_68_P32543772 | chrX:93291348-93291392                            | NM_010833:-13           | Msn           | PROMOTER               | 0.305                                                        | 2.325                          | 4448.28            | 10340.82           | 0.709                          | 1856.50            | 1315.46            |
| A_68_P31112704 | chr17:26975881-26975926                           | NM_008700:2607          | Nkx2-5        | INSIDE                 | 0.305                                                        | 0.598                          | 3038.79            | 1816.48            | 0.182                          | 2319.96            | 422.79             |
| A_68_P29753340 | chr14:80169561-80169605                           | NM_001042726:1537       | Pcdh8         | INSIDE                 | 0.305                                                        | 0.490                          | 1698.45            | 832.13             | 0.149                          | 1298.54            | 193.99             |
| A_68_P25601371 | chr7:150687585-150687629                          | NM_009434:823           | Phlda2        | INSIDE                 | 0.305                                                        | 0.640                          | 2217.40            | 1418.70            | 0.195                          | 1596.89            | 311.32             |
| A_68_P29682921 | chr14:67691110-67691154                           | NM_001205188:176        | Ppp2r2a       | INSIDE                 | 0.305                                                        | 0.434                          | 5722.88            | 2483.43            | 0.132                          | 4602.45            | 608.34             |
| A_68_P22615129 | chr3:146183762-146183806                          | NM_027371:603           | Rplf1         | INSIDE                 | 0.305                                                        | 0.649                          | 994.91             | 646.00             | 0.198                          | 927.29             | 183.38             |
| A_68_P22388660 | chr3:103718569-103718613                          | NM_172684:548           | Rsbm1         | INSIDE                 | 0.305                                                        | 0.619                          | 849.22             | 525.31             | 0.189                          | 611.07             | 115.40             |
| A_68_P27286214 | chr10:80363023-80363067                           | NM_013895:670           | Timm13        | INSIDE                 | 0.305                                                        | 0.591                          | 2288.03            | 1351.38            | 0.180                          | 1692.35            | 305.26             |
| A_68_P28326655 | chr12:31269403-31269447                           | NM_172049:117           | Tmem18        | INSIDE                 | 0.305                                                        | 0.464                          | 1240.91            | 575.78             | 0.141                          | 847.55             | 119.87             |
| A_68_P32039604 | chr19:27293281-27293330                           | NM_001161420:1796       | Vldlr         | INSIDE                 | 0.305                                                        | 0.474                          | 1209.02            | 572.49             | 0.144                          | 833.43             | 120.26             |
| A_68_P26217896 | chr8:122625507-122625560                          | NM_133967:-161          | Zdhhc7        | PROMOTER               | 0.305                                                        | 0.442                          | 1251.84            | 553.33             | 0.135                          | 997.37             | 134.37             |
| A_68_P23695857 | chr5:53009885-53009931                            | ENSMUST00000064097:342  |               | INSIDE                 | 0.305                                                        | 0.432                          | 1681.15            | 726.32             | 0.132                          | 1339.27            | 176.66             |
| A_68_P31022091 | chr17:6256702-6256746                             | ENSMUST00000121576:2822 |               | DOWNSTREAM             | 0.305                                                        | 0.404                          | 2167.79            | 875.92             | 0.123                          | 1904.63            | 234.91             |
| A_68_P21707651 | chr2:144353166-144353210                          | NM_172859:-54           | 6330439K17Rik | DIVERGENT_PROMOTER     | 0.304                                                        | 0.336                          | 2405.03            | 808.62             | 0.102                          | 2017.05            | 206.21             |
| A_68_P21061281 | chr2:22923971-22924015                            | NM_001102437:-599       | Acbd5         | PROMOTER               | 0.304                                                        | 0.505                          | 1195.66            | 604.01             | 0.154                          | 906.21             | 139.11             |
| A_68_P32186059 | chr19:54121110-54121154                           | NM_007417:1461          | Adra2a        | INSIDE                 | 0.304                                                        | 0.409                          | 2147.85            | 877.83             | 0.124                          | 1504.28            | 186.62             |
| A_68_P25737281 | chr8:28338526-28338570                            | NM_013462:1512          | Adrb3         | INSIDE                 | 0.304                                                        | 0.722                          | 2240.17            | 1618.18            | 0.220                          | 1672.88            | 367.55             |
| A_68_P22408052 | chr3:107498784-107498828                          | NM_145542:660           | Aheyl1        | INSIDE                 | 0.304                                                        | 0.538                          | 963.70             | 518.10             | 0.164                          | 739.87             | 121.09             |
| A_68_P21419446 | chr2:90725823-90725867                            | NM_026161:-98           | C1qtmf4       | PROMOTER               | 0.304                                                        | 0.498                          | 1106.38            | 550.81             | 0.152                          | 853.07             | 129.25             |
| A_68_P21778673 | chr2:157563323-157563367                          | NM_025680:208           | Cttnb1        | INSIDE                 | 0.304                                                        | 0.482                          | 1643.11            | 792.00             | 0.147                          | 1302.72            | 190.98             |
| A_68_P24880220 | chr6:137703212-137703256                          | NM_172733:137           | Dera          | INSIDE                 | 0.304                                                        | 0.674                          | 1331.36            | 896.68             | 0.205                          | 1083.34            | 222.02             |
| A_68_P30600193 | chr16:22857790-22857834                           | NM_001190804:-105       | Dnajb11       | DIVERGENT_PROMOTER     | 0.304                                                        | 0.577                          | 2072.81            | 1195.30            | 0.176                          | 1427.93            | 250.66             |
| A_68_P20457519 | chr1:95698419-95698463                            | NM_001105667:71         | Dtymk         | INSIDE                 | 0.304                                                        | 0.502                          | 1962.36            | 984.78             | 0.153                          | 1438.06            | 219.73             |
| A_68_P22010767 | chr3:27270950-27270994                            | NM_177330:700           | Ghsr          | INSIDE                 | 0.304                                                        | 0.673                          | 2032.00            | 1367.20            | 0.205                          | 1465.99            | 299.92             |
| A_68_P30547081 | chr16:11253703-11253747                           | NM_001130008:694        | Gspt1         | INSIDE                 | 0.304                                                        | 0.491                          | 2163.25            | 1062.04            | 0.149                          | 1863.27            | 278.48             |
| A_68_P31774691 | chr18:64500742-64500786                           | NM_194268:747           | Onecut2       | INSIDE                 | 0.304                                                        | 0.612                          | 2694.80            | 1648.87            | 0.186                          | 1986.83            | 369.33             |
| A_68_P28185658 | chr11:120478932-120478976                         | NM_024229:250           | Pcyt2         | INSIDE                 | 0.304                                                        | 0.441                          | 1269.98            | 560.42             | 0.134                          | 936.43             | 125.46             |
| A_68_P21888794 | chr2:177877318-177877362                          | NM_028806:703           | Phactr3       | INSIDE                 | 0.304                                                        | 0.532                          | 1007.53            | 536.11             | 0.162                          | 746.47             | 120.70             |
| A_68_P30447393 | chr15:93350085-93350134                           | NM_001033217:76213      | Prickle1      | INSIDE                 | 0.304                                                        | 0.582                          | 1032.40            | 600.49             | 0.177                          | 940.59             | 166.16             |
| A_68_P32225520 | chr19:60543550-60543594                           | NM_201615:635           | Prhr          | INSIDE                 | 0.304                                                        | 0.643                          | 1273.50            | 819.03             | 0.196                          | 1015.53            | 198.76             |
| A_68_P23538312 | chr5:23289160-23289204                            | NM_178403:297           | Pus7          | INSIDE                 | 0.304                                                        | 0.336                          | 2362.92            | 793.83             | 0.102                          | 1704.18            | 174.13             |
| A_68_P21817911 | chr2:164268487-164268531                          | NM_011521:180           | Sdc4          | INSIDE                 | 0.304                                                        | 0.522                          | 1281.44            | 668.61             | 0.159                          | 1064.40            | 169.09             |
| A_68_P32185503 | chr19:54020036-54020080                           | NM_019658:693           | Shoc2         | INSIDE                 | 0.304                                                        | 0.576                          | 1786.87            | 1029.32            | 0.175                          | 1393.04            | 243.57             |
| A_68_P28186320 | chr11:120574795-120574839                         | NM_016665:265           | Stral3        | INSIDE                 | 0.304                                                        | 0.653                          | 1701.86            | 1111.63            | 0.199                          | 1269.57            | 252.10             |
| A_68_P28031414 | chr11:94071733-94071777                           | NM_009427:-1013         | Tob1          | PROMOTER               | 0.304                                                        | 0.584                          | 957.13             | 559.06             | 0.178                          | 830.53             | 147.57             |
| A_68_P28788255 | chr13:3477597-3477641                             | NR_015522:70            | 2810429I04Rik | INSIDE                 | 0.303                                                        | 0.585                          | 2232.57            | 1306.06            | 0.177                          | 1586.41            | 281.05             |
| A_68_P21755509 | chr2:153355180-153355224                          | NM_001134300:505        | 8430427H17Rik | INSIDE                 | 0.303                                                        | 0.536                          | 4321.53            | 2314.36            | 0.162                          | 3184.50            | 517.36             |
| A_68_P21612948 | chr2:127188974-127189018                          | NM_009633:-25           | Adra2b        | PROMOTER               | 0.303                                                        | 0.563                          | 1277.86            | 718.97             | 0.170                          | 1108.29            | 188.80             |
| A_68_P25089669 | chr7:52105544-52105588                            | NM_026270:970           | Akt1s1        | INSIDE                 | 0.303                                                        | 0.509                          | 1725.73            | 878.07             | 0.154                          | 1072.00            | 165.37             |
| A_68_P30421424 | chr15:88650529-88650573                           | NM_029720:475           | Crel2         | INSIDE                 | 0.303                                                        | 0.531                          | 1051.01            | 558.34             | 0.161                          | 858.22             | 138.19             |
| A_68_P31544272 | chr18:21459015-21459059                           | NM_001033445:-396       | Fam59a        | PROMOTER               | 0.303                                                        | 0.644                          | 2589.20            | 1668.63            | 0.195                          | 2037.40            | 398.16             |

| ProbeName      | Target position of probe on CpG island microarray | TargetID          | GeneSymbol    | CpG island Description | Ratio of relative methylation (TiO <sub>2</sub> -NP/Vehicle) | Sham group                     |                    |                    | TiO <sub>2</sub> -H group      |                    |                    |
|----------------|---------------------------------------------------|-------------------|---------------|------------------------|--------------------------------------------------------------|--------------------------------|--------------------|--------------------|--------------------------------|--------------------|--------------------|
|                |                                                   |                   |               |                        |                                                              | Relative methylation (Cy5/Cy3) | Cy3 signal (Input) | Cy5 signal (MeDIP) | Relative methylation (Cy5/Cy3) | Cy3 signal (Input) | Cy5 signal (MeDIP) |
| A_68_P27800930 | chr11:52578204-52578248                           | NM_177059:19      | Fstl4         | INSIDE                 | 0.303                                                        | 0.526                          | 1767.90            | 929.20             | 0.159                          | 1438.16            | 228.84             |
| A_68_P28156837 | chr11:115873664-115873708                         | NM_016905:347     | Galk1         | INSIDE                 | 0.303                                                        | 0.558                          | 1834.42            | 1024.51            | 0.169                          | 1392.43            | 235.32             |
| A_68_P24864114 | chr6:134847635-134847686                          | NM_001167697-9783 | Gpr19         | PROMOTER               | 0.303                                                        | 0.666                          | 1646.81            | 1096.63            | 0.202                          | 1249.68            | 252.28             |
| A_68_P21319207 | chr2:71227345-71227389                            | NM_026115:50      | Hat1          | PROMOTER               | 0.303                                                        | 0.421                          | 1296.44            | 545.81             | 0.128                          | 1004.31            | 128.31             |
| A_68_P32123366 | chr19:42854178-42854227                           | NM_019424:264     | Hps1          | INSIDE                 | 0.303                                                        | 0.504                          | 1169.93            | 590.13             | 0.153                          | 865.39             | 132.45             |
| A_68_P31161217 | chr17:35978332-35978376                           | NM_001010833:-88  | Mdc1          | DIVERGENT_PROMOTER     | 0.303                                                        | 0.334                          | 1856.65            | 620.90             | 0.101                          | 1507.56            | 152.63             |
| A_68_P21069127 | chr2:24830756-24830800                            | NM_001031808:-160 | Mrp141        | DIVERGENT_PROMOTER     | 0.303                                                        | 0.401                          | 1398.91            | 561.51             | 0.122                          | 991.06             | 120.44             |
| A_68_P23615663 | chr5:38208346-38208390                            | NM_010835:7456    | Msx1          | DOWNSTREAM             | 0.303                                                        | 1.765                          | 3893.21            | 6873.03            | 0.535                          | 2698.87            | 1444.12            |
| A_68_P21821258 | chr2:164860465-164860509                          | NM_144892:-207    | Ncoa5         | PROMOTER               | 0.303                                                        | 0.546                          | 1543.78            | 842.66             | 0.165                          | 1208.50            | 199.80             |
| A_68_P21350022 | chr2:76245198-76245242                            | NM_145525:626     | Osbpl6        | INSIDE                 | 0.303                                                        | 0.669                          | 3267.75            | 2185.75            | 0.202                          | 2481.34            | 502.37             |
| A_68_P32374343 | chrX:48371227-48371271                            | NM_172413:-53     | Rap2c         | PROMOTER               | 0.303                                                        | 5.261                          | 4264.93            | 22436.89           | 1.595                          | 2010.66            | 3206.85            |
| A_68_P30670708 | chr16:35542234-35542279                           | NM_013661:809     | Sema5b        | INSIDE                 | 0.303                                                        | 0.691                          | 2015.11            | 1392.01            | 0.209                          | 1485.20            | 310.35             |
| A_68_P24604447 | chr6:85282597-85282641                            | NM_178639:798     | Sfxn5         | INSIDE                 | 0.303                                                        | 0.371                          | 2852.15            | 1057.76            | 0.112                          | 2147.87            | 241.55             |
| A_68_P20946924 | chr1:194862258-194862302                          | NM_181546:-388    | Syt14         | PROMOTER               | 0.303                                                        | 1.558                          | 5136.92            | 8003.02            | 0.472                          | 3535.96            | 1667.82            |
| A_68_P30380081 | chr15:81690360-81690404                           | NM_020507:-1626   | Tob2          | PROMOTER               | 0.303                                                        | 0.448                          | 1756.42            | 786.79             | 0.136                          | 1382.89            | 187.56             |
| A_68_P23865421 | chr5:87233222-87233266                            | NM_177680:-270    | Ythdc1        | PROMOTER               | 0.303                                                        | 0.584                          | 2462.73            | 1439.18            | 0.177                          | 1878.03            | 332.25             |
| A_68_P27287622 | chr10:80599571-80599615                           | NM_010731:577     | Zbtb7a        | INSIDE                 | 0.303                                                        | 0.454                          | 1161.77            | 527.20             | 0.137                          | 874.92             | 120.18             |
| A_68_P29940450 | chr14:119105251-119105295                         | NM_001033336:169  | Abcc4         | INSIDE                 | 0.302                                                        | 0.501                          | 1987.26            | 995.31             | 0.151                          | 1713.82            | 259.17             |
| A_68_P26797759 | chr9:105397652-105397696                          | NM_175025:-227    | Atp2e1        | PROMOTER               | 0.302                                                        | 0.667                          | 2789.01            | 1860.65            | 0.202                          | 2145.78            | 432.40             |
| A_68_P32050464 | chr19:29064739-29064788                           | NM_025950:-220    | Cdc37l1       | PROMOTER               | 0.302                                                        | 0.491                          | 1312.98            | 644.98             | 0.148                          | 1021.80            | 151.54             |
| A_68_P20619646 | chr1:134035792-134035836                          | NM_008795:448     | Cdk18         | INSIDE                 | 0.302                                                        | 0.491                          | 1523.18            | 748.63             | 0.149                          | 1239.82            | 184.16             |
| A_68_P29659272 | chr14:63741639-63741683                           | NM_007798:359     | Ctsb          | INSIDE                 | 0.302                                                        | 0.570                          | 985.32             | 561.73             | 0.172                          | 849.82             | 146.38             |
| A_68_P26018981 | chr8:86773349-86773396                            | NM_001007571:288  | D8ErtD738e    | INSIDE                 | 0.302                                                        | 0.479                          | 1548.80            | 742.58             | 0.145                          | 1177.15            | 170.63             |
| A_68_P28914792 | chr13:30078001-30078045                           | NM_010093:-90     | E2f3          | PROMOTER               | 0.302                                                        | 0.519                          | 1421.78            | 737.76             | 0.157                          | 991.18             | 155.34             |
| A_68_P31484555 | chr18:9214035-9214079                             | NM_008058:1203    | Fzd8          | INSIDE                 | 0.302                                                        | 0.639                          | 3884.69            | 2482.56            | 0.193                          | 2795.20            | 539.70             |
| A_68_P26458363 | chr9:42705778-42705822                            | NM_175481:46654   | Grik4         | INSIDE                 | 0.302                                                        | 0.618                          | 5699.87            | 3523.12            | 0.186                          | 3862.16            | 719.99             |
| A_68_P31159261 | chr17:35606907-35606951                           | NM_010391:-105    | H2-Q10        | PROMOTER               | 0.302                                                        | 0.564                          | 1180.89            | 666.38             | 0.170                          | 1060.75            | 180.49             |
| A_68_P29071677 | chr13:58230562-58230606                           | NM_029872:-667    | Hnrnpa0       | PROMOTER               | 0.302                                                        | 0.622                          | 3034.47            | 1887.17            | 0.188                          | 2518.81            | 472.73             |
| A_68_P23544150 | chr5:24348013-24348057                            | NM_053075:145     | Rheb          | INSIDE                 | 0.302                                                        | 0.447                          | 2693.22            | 1203.31            | 0.135                          | 1930.51            | 260.66             |
| A_68_P24057380 | chr5:124199269-124199317                          | NM_001005525:129  | Rsrc2         | INSIDE                 | 0.302                                                        | 0.593                          | 1203.73            | 713.96             | 0.179                          | 876.61             | 156.88             |
| A_68_P31412093 | chr17:86084523-86084567                           | NM_011380:3050    | Six2          | INSIDE                 | 0.302                                                        | 0.590                          | 1185.81            | 700.21             | 0.178                          | 970.62             | 172.83             |
| A_68_P32766763 | chrX:153929218-153929262                          | NM_009214:738     | Sms           | INSIDE                 | 0.302                                                        | 1.425                          | 1456.92            | 2076.00            | 0.431                          | 606.78             | 261.41             |
| A_68_P26882495 | chr9:121186443-121186487                          | NM_177589:-174    | Ulk4          | PROMOTER               | 0.302                                                        | 0.724                          | 1738.14            | 1258.88            | 0.219                          | 1360.39            | 297.54             |
| A_68_P24817209 | chr6:124779503-124779547                          | NM_013700:-59     | Usp5          | DIVERGENT_PROMOTER     | 0.302                                                        | 0.503                          | 1165.94            | 586.78             | 0.152                          | 782.00             | 118.66             |
| A_68_P23315907 | chr4:132686541-132686585                          | NM_153423:15      | Wasf2         | INSIDE                 | 0.302                                                        | 0.494                          | 1284.81            | 635.26             | 0.149                          | 1019.39            | 152.15             |
| A_68_P30673430 | chr16:36041581-36041625                           | NM_027113:327     | Wdr5b         | INSIDE                 | 0.302                                                        | 0.628                          | 1457.42            | 915.53             | 0.190                          | 1119.50            | 212.43             |
| A_68_P20352371 | chr1:75165078-75165131                            | NM_001159905:-115 | Zfand2b       | PROMOTER               | 0.302                                                        | 0.425                          | 1698.12            | 721.94             | 0.128                          | 1230.07            | 157.78             |
| A_68_P24130230 | chr5:138882841-138882885                          | NM_028130:159     | Zfp157        | INSIDE                 | 0.302                                                        | 0.705                          | 1946.79            | 1372.41            | 0.213                          | 1620.02            | 345.40             |
| A_68_P25028819 | chr7:30645245-30645299                            | NM_172740:275     | Zfp420        | INSIDE                 | 0.302                                                        | 0.593                          | 957.43             | 567.41             | 0.179                          | 679.63             | 121.45             |
| A_68_P21568392 | chr2:119034387-119034433                          | NM_001164827:-45  | Zfyve19       | PROMOTER               | 0.302                                                        | 0.484                          | 1173.15            | 567.34             | 0.146                          | 828.70             | 121.06             |
| A_68_P26200041 | chr8:119502652-119502696                          | NM_027103:169     | 1700030J22Rik | INSIDE                 | 0.301                                                        | 0.583                          | 1336.08            | 779.09             | 0.175                          | 1050.21            | 184.17             |
| A_68_P31619432 | chr18:35813900-35813944                           | NM_027222:-4901   | 2010001M09Rik | PROMOTER               | 0.301                                                        | 0.538                          | 1419.87            | 764.60             | 0.162                          | 1072.14            | 173.69             |
| A_68_P20239573 | chr1:54982711-54982755                            | NM_001081433:499  | Ankrd44       | INSIDE                 | 0.301                                                        | 0.566                          | 2291.09            | 1296.37            | 0.170                          | 1823.89            | 310.36             |
| A_68_P21566797 | chr2:118728139-118728183                          | NM_001045523:810  | Bahd1         | INSIDE                 | 0.301                                                        | 0.538                          | 3665.07            | 1970.45            | 0.162                          | 2797.55            | 451.99             |
| A_68_P28356775 | chr12:36883341-36883387                           | NM_025840:48      | Bzw2          | INSIDE                 | 0.301                                                        | 1.635                          | 1872.76            | 3062.06            | 0.492                          | 1394.80            | 686.87             |
| A_68_P23467995 | chr5:8422471-8422515                              | NM_001190717:224  | Dbf4          | INSIDE                 | 0.301                                                        | 0.385                          | 1346.98            | 517.97             | 0.116                          | 1040.47            | 120.50             |
| A_68_P31166661 | chr17:37125639-37125683                           | NM_001115075:789  | H2-M5         | INSIDE                 | 0.301                                                        | 0.729                          | 2275.44            | 1658.37            | 0.220                          | 1770.73            | 388.90             |
| A_68_P26020977 | chr8:87186135-87186179                            | NM_010499:595     | Ier2          | INSIDE                 | 0.301                                                        | 0.488                          | 1879.99            | 917.11             | 0.147                          | 1500.50            | 220.21             |
| A_68_P26809754 | chr9:107489944-107489988                          | NM_025903:-82     | Ifrd2         | PROMOTER               | 0.301                                                        | 0.503                          | 1227.58            | 618.03             | 0.152                          | 1004.00            | 152.27             |
| A_68_P27234954 | chr10:70811019-70811063                           | NM_027184:500     | Ipmk          | INSIDE                 | 0.301                                                        | 0.628                          | 4411.32            | 2769.91            | 0.189                          | 3306.52            | 624.87             |
| A_68_P29469008 | chr14:24823022-24823066                           | NM_010610:383     | Kenma1        | INSIDE                 | 0.301                                                        | 0.601                          | 2823.74            | 1698.02            | 0.181                          | 1847.96            | 333.96             |

| ProbeName      | Target position of probe on CpG island microarray | TargetID          | GeneSymbol    | CpG island Description | Ratio of relative methylation (TiO <sub>2</sub> -NP/Vehicle) | Sham group                     |                    |                    | TiO <sub>2</sub> -H group      |                    |                    |
|----------------|---------------------------------------------------|-------------------|---------------|------------------------|--------------------------------------------------------------|--------------------------------|--------------------|--------------------|--------------------------------|--------------------|--------------------|
|                |                                                   |                   |               |                        |                                                              | Relative methylation (Cy5/Cy3) | Cy3 signal (Input) | Cy5 signal (MeDIP) | Relative methylation (Cy5/Cy3) | Cy3 signal (Input) | Cy5 signal (MeDIP) |
| A_68_P30433465 | chr15:90879520-90879574                           | NM_001109040:833  | Kif21a        | INSIDE                 | 0.301                                                        | 0.443                          | 1163.02            | 514.88             | 0.133                          | 904.58             | 120.45             |
| A_68_P24517586 | chr6:66485635-66485679                            | NM_019499:195     | Mad2l1        | INSIDE                 | 0.301                                                        | 0.648                          | 1159.02            | 751.05             | 0.195                          | 1025.09            | 199.61             |
| A_68_P27284924 | chr10:80164367-80164423                           | NM_172457:171     | Mobkl2a       | INSIDE                 | 0.301                                                        | 0.506                          | 1100.89            | 556.99             | 0.153                          | 794.12             | 121.12             |
| A_68_P30018889 | chr15:11834455-11834499                           | NM_001039181:953  | Npr3          | INSIDE                 | 0.301                                                        | 0.597                          | 4118.83            | 2458.74            | 0.180                          | 3024.13            | 543.61             |
| A_68_P31258135 | chr17:56890739-56890783                           | NM_008738:6193    | Nrtn          | INSIDE                 | 0.301                                                        | 1.430                          | 1022.35            | 1462.25            | 0.430                          | 808.62             | 347.81             |
| A_68_P25507194 | chr7:134913194-134913238                          | NM_198424:-112    | Orai3         | PROMOTER               | 0.301                                                        | 0.468                          | 1119.03            | 523.95             | 0.141                          | 870.90             | 122.76             |
| A_68_P25093637 | chr7:52781402-52781446                            | NM_008654:214     | Ppp1r15a      | INSIDE                 | 0.301                                                        | 0.543                          | 1675.58            | 909.14             | 0.163                          | 1291.61            | 210.70             |
| A_68_P23702720 | chr5:54200876-54200920                            | NM_144517:33      | Tbc1d19       | INSIDE                 | 0.301                                                        | 0.709                          | 1440.75            | 1020.80            | 0.213                          | 1099.03            | 234.00             |
| A_68_P27892869 | chr11:68884583-68884627                           | NM_025838:294     | Tmem107       | INSIDE                 | 0.301                                                        | 0.451                          | 1590.84            | 718.13             | 0.136                          | 1179.13            | 160.48             |
| A_68_P20076127 | chr1:21068999-21069043                            | NM_133252:270     | Tram2         | INSIDE                 | 0.301                                                        | 0.699                          | 3103.23            | 2169.79            | 0.210                          | 2237.15            | 470.26             |
| A_68_P31889607 | chr18:84758993-84759052                           | NM_001033341:-126 | Zfp407        | PROMOTER               | 0.301                                                        | 0.290                          | 1917.24            | 556.95             | 0.087                          | 1370.17            | 119.82             |
| A_68_P27292200 | chr10:81817022-81817066                           | DQ459435:45       |               | INSIDE                 | 0.301                                                        | 0.538                          | 1438.92            | 773.84             | 0.162                          | 1087.39            | 175.96             |
| A_68_P23349880 | chr4:138686224-138686268                          | NR_033745:706     | 2310028011Rik | INSIDE                 | 0.300                                                        | 0.640                          | 828.17             | 529.84             | 0.192                          | 621.75             | 119.45             |
| A_68_P21441000 | chr2:94246926-94246970                            | NR_027831:85      | 2810002D19Rik | INSIDE                 | 0.300                                                        | 0.402                          | 1299.08            | 521.91             | 0.121                          | 963.26             | 116.22             |
| A_68_P29234321 | chr13:95129057-95129101                           | NM_009680:164     | Ap3b1         | INSIDE                 | 0.300                                                        | 0.707                          | 1455.47            | 1028.55            | 0.212                          | 1162.74            | 246.57             |
| A_68_P25657379 | chr8:117581501-11758194                           | NM_001113518:-157 | Arhgef7       | PROMOTER               | 0.300                                                        | 0.631                          | 5001.76            | 3157.28            | 0.189                          | 3997.93            | 757.01             |
| A_68_P24004708 | chr5:115021723-115021774                          | NM_001004180:3489 | BC057022      | INSIDE                 | 0.300                                                        | 0.522                          | 1088.32            | 568.08             | 0.157                          | 764.33             | 119.65             |
| A_68_P21101914 | chr2:30061663-30061707                            | NM_172404:-465    | Ceb1l         | PROMOTER               | 0.300                                                        | 0.497                          | 2037.06            | 1013.36            | 0.149                          | 1516.18            | 226.33             |
| A_68_P31252979 | chr17:56098596-56098641                           | NM_028381:9       | Ccdc94        | INSIDE                 | 0.300                                                        | 0.628                          | 842.30             | 529.27             | 0.189                          | 638.62             | 120.51             |
| A_68_P29098530 | chr13:64471460-64471504                           | NM_009984:132     | Ctsl          | INSIDE                 | 0.300                                                        | 0.650                          | 1179.67            | 766.37             | 0.195                          | 936.16             | 182.74             |
| A_68_P27180612 | chr10:60915666-60915710                           | NM_010124:-271    | Eif4ebp2      | PROMOTER               | 0.300                                                        | 2.127                          | 3037.71            | 6460.83            | 0.637                          | 2245.62            | 1431.38            |
| A_68_P26761637 | chr9:98886525-98886573                            | NM_001122851:-243 | Faim          | PROMOTER               | 0.300                                                        | 0.342                          | 1574.82            | 538.81             | 0.103                          | 1150.49            | 118.07             |
| A_68_P23320286 | chr4:133523495-133523539                          | NM_016957:390     | Hmgn2         | INSIDE                 | 0.300                                                        | 0.453                          | 3163.61            | 1431.56            | 0.136                          | 2470.57            | 334.83             |
| A_68_P29616408 | chr14:55733743-55733787                           | NM_177049:2008    | Jph4          | INSIDE                 | 0.300                                                        | 0.666                          | 2341.23            | 1558.41            | 0.200                          | 1686.13            | 333.22             |
| A_68_P28068130 | chr11:100302472-100302516                         | NM_026561:-91     | Nt5c3l        | DIVERGENT_PROMOTER     | 0.300                                                        | 0.677                          | 1646.00            | 1113.66            | 0.203                          | 1214.32            | 246.45             |
| A_68_P30380501 | chr15:81756859-81756907                           | NM_030229:-239    | Poir3h        | PROMOTER               | 0.300                                                        | 0.498                          | 1063.02            | 529.56             | 0.150                          | 797.95             | 119.37             |
| A_68_P21091470 | chr2:28369078-28369122                            | NM_001145834:414  | Ralgds        | INSIDE                 | 0.300                                                        | 0.445                          | 1702.64            | 757.67             | 0.133                          | 1231.55            | 164.31             |
| A_68_P22312700 | chr3:88044849-88044893                            | NM_021375:13736   | Rhbq          | DOWNSTREAM             | 0.300                                                        | 0.675                          | 1054.10            | 712.01             | 0.203                          | 878.09             | 177.91             |
| A_68_P30013955 | chr15:10966024-10966068                           | NM_178717:1677    | Rxfp3         | INSIDE                 | 0.300                                                        | 0.692                          | 1201.59            | 831.41             | 0.208                          | 816.46             | 169.56             |
| A_68_P23441760 | chr4:155367175-155367219                          | NM_011341:174     | Sdf4          | INSIDE                 | 0.300                                                        | 0.443                          | 3597.37            | 1592.29            | 0.133                          | 2849.65            | 378.39             |
| A_68_P29337690 | chr13:113717502-113717546                         | NM_028151:64      | Skiv2l2       | INSIDE                 | 0.300                                                        | 0.574                          | 986.30             | 565.81             | 0.172                          | 703.81             | 121.22             |
| A_68_P31943156 | chr19:8788183-8788228                             | NM_008577:182     | Sle3a2        | INSIDE                 | 0.300                                                        | 0.649                          | 1373.09            | 891.78             | 0.195                          | 937.37             | 182.55             |
| A_68_P30600190 | chr16:22857403-22857447                           | NM_001081368:218  | Tbecd1        | INSIDE                 | 0.300                                                        | 0.504                          | 1833.25            | 923.31             | 0.151                          | 1422.85            | 215.19             |
| A_68_P27495880 | chr10:119645922-119645966                         | NM_026617:63      | Tmbim4        | INSIDE                 | 0.300                                                        | 0.511                          | 3248.99            | 1658.80            | 0.153                          | 2547.88            | 389.68             |
| A_68_P24304147 | chr6:24906093-24906137                            | NM_177013:11      | Tmem229a      | INSIDE                 | 0.300                                                        | 0.461                          | 2128.04            | 981.74             | 0.139                          | 1780.30            | 246.61             |
| A_68_P21768465 | chr2:155755929-155755973                          | NM_018888:96      | Uqcc          | INSIDE                 | 0.300                                                        | 0.548                          | 2307.00            | 1265.32            | 0.164                          | 1686.87            | 277.31             |
| A_68_P24156072 | chr5:144090683-144090727                          | NM_028379:201     | Zdhhc4        | INSIDE                 | 0.300                                                        | 0.663                          | 2941.05            | 1949.64            | 0.199                          | 1987.61            | 394.70             |
| A_68_P24951780 | chr7:5003473-5003517                              | NM_026900:361     | Zfp580        | INSIDE                 | 0.300                                                        | 1.634                          | 1369.84            | 2238.52            | 0.491                          | 1043.17            | 511.69             |
| A_68_P32133947 | chr19:44792110-44792165                           |                   |               | Unknown                | 0.300                                                        | 2.020                          | 1518.88            | 3068.14            | 0.605                          | 1175.32            | 711.34             |
| A_68_P28140562 | chr11:113063090-113063135                         | NR_015556:40      | 2610035D17Rik | INSIDE                 | 0.299                                                        | 1.773                          | 1746.44            | 3096.57            | 0.529                          | 1170.83            | 619.76             |
| A_68_P23545746 | chr5:24606967-24607011                            | NR_027851:196     | 2900005J15Rik | INSIDE                 | 0.299                                                        | 0.607                          | 2727.40            | 1655.22            | 0.181                          | 2023.02            | 366.75             |
| A_68_P27852924 | chr11:62062701-62062745                           | NM_007413:237     | Adora2b       | INSIDE                 | 0.299                                                        | 0.603                          | 1530.82            | 923.71             | 0.180                          | 1165.56            | 210.17             |
| A_68_P32183070 | chr19:53603197-53603241                           | NM_001085390:-589 | Dusp5         | PROMOTER               | 0.299                                                        | 0.465                          | 1305.63            | 607.44             | 0.139                          | 969.44             | 135.02             |
| A_68_P23145544 | chr4:99322690-99322737                            | NM_010425:-276    | Foxd3         | PROMOTER               | 0.299                                                        | 0.633                          | 841.55             | 532.51             | 0.189                          | 638.07             | 120.81             |
| A_68_P24078733 | chr5:128112702-128112746                          | NM_177005:93      | Glt1d1        | INSIDE                 | 0.299                                                        | 0.428                          | 1751.18            | 749.64             | 0.128                          | 1530.19            | 195.95             |
| A_68_P24111876 | chr5:134660418-134660462                          | NM_053266:533     | Gtf2ird2      | INSIDE                 | 0.299                                                        | 0.639                          | 1141.25            | 728.79             | 0.191                          | 838.54             | 160.37             |
| A_68_P21129656 | chr2:34628056-34628100                            | NM_001163434:469  | Hspa5         | INSIDE                 | 0.299                                                        | 0.482                          | 1166.19            | 562.07             | 0.144                          | 957.86             | 138.21             |
| A_68_P20409050 | chr1:87791484-87791528                            | NM_022417:422     | Itn2c         | INSIDE                 | 0.299                                                        | 0.703                          | 1596.53            | 1122.15            | 0.210                          | 1179.45            | 247.88             |
| A_68_P30325017 | chr15:72376544-72376592                           | NM_001033876:141  | Kenk9         | INSIDE                 | 0.299                                                        | 0.552                          | 1254.57            | 692.97             | 0.165                          | 989.60             | 163.53             |
| A_68_P23990800 | chr5:112657892-112657936                          | NR_003718:54      | Miat          | INSIDE                 | 0.299                                                        | 0.533                          | 1405.27            | 749.37             | 0.160                          | 1059.02            | 168.97             |
| A_68_P22314346 | chr3:88340207-88340251                            | NR_035434:76      | Mir1905       | INSIDE                 | 0.299                                                        | 0.671                          | 973.25             | 653.32             | 0.201                          | 734.20             | 147.55             |

| ProbeName      | Target position of probe on CpG island microarray | TargetID                 | GeneSymbol    | CpG island Description | Ratio of relative methylation (TiO <sub>2</sub> -NP/Vehicle) | Sham group                     |                    |                    | TiO <sub>2</sub> -H group      |                    |                    |
|----------------|---------------------------------------------------|--------------------------|---------------|------------------------|--------------------------------------------------------------|--------------------------------|--------------------|--------------------|--------------------------------|--------------------|--------------------|
|                |                                                   |                          |               |                        |                                                              | Relative methylation (Cy5/Cy3) | Cy3 signal (Input) | Cy5 signal (MeDIP) | Relative methylation (Cy5/Cy3) | Cy3 signal (Input) | Cy5 signal (MeDIP) |
| A_68_P30719817 | chr16:44140456-44140500                           | NM_028108:557            | Naa50         | INSIDE                 | 0.299                                                        | 0.464                          | 1161.17            | 538.28             | 0.139                          | 895.49             | 124.12             |
| A_68_P32116953 | chr19:41818287-41818331                           | NM_015748:38             | Slit1         | INSIDE                 | 0.299                                                        | 1.381                          | 5569.52            | 7689.30            | 0.412                          | 4138.15            | 1705.80            |
| A_68_P28615271 | chr12:88641179-88641223                           | NM_011479:87980          | Sptlc2        | DOWNSTREAM             | 0.299                                                        | 0.614                          | 3622.78            | 2225.65            | 0.184                          | 2774.53            | 509.31             |
| A_68_P20616231 | chr1:13342247-13342291                            | NM_001081011:1670        | Srgap2        | INSIDE                 | 0.299                                                        | 0.412                          | 2073.72            | 854.41             | 0.123                          | 1549.42            | 191.09             |
| A_68_P24162465 | chr5:145529208-145529252                          | NM_001081362:-430        | Trrap         | DIVERGENT_PROMOTER     | 0.299                                                        | 0.611                          | 1448.64            | 885.12             | 0.183                          | 1176.65            | 214.85             |
| A_68_P23872839 | chr5:88993614-88993669                            | NM_023054:10134          | Utp3          | DOWNSTREAM             | 0.299                                                        | 0.459                          | 1123.80            | 515.85             | 0.137                          | 847.87             | 116.46             |
| A_68_P30588339 | chr16:20591420-20591465                           | NM_182636:1788           | Vwa5b2        | INSIDE                 | 0.299                                                        | 0.507                          | 1289.65            | 653.54             | 0.151                          | 985.18             | 149.07             |
| A_68_P26139675 | chr8:108939273-108939317                          | NM_011764:56             | Zfp90         | INSIDE                 | 0.299                                                        | 0.494                          | 1046.46            | 516.55             | 0.148                          | 842.17             | 124.23             |
| A_68_P29102450 | chr13:65343136-65343180                           |                          |               | Unknown                | 0.299                                                        | 1.945                          | 9762.87            | 18991.52           | 0.582                          | 6538.54            | 3806.31            |
| A_68_P26847337 | chr9:114888048-114888092                          | CCDS52952.1:3755         |               | DOWNSTREAM             | 0.299                                                        | 0.443                          | 1615.80            | 715.37             | 0.132                          | 1356.59            | 179.48             |
| A_68_P30003954 | chr15:9000908-9000952                             | NM_001040395:-78         | 1110020G09Rik | PROMOTER               | 0.298                                                        | 0.579                          | 2192.77            | 1270.55            | 0.173                          | 1518.52            | 262.25             |
| A_68_P23547921 | chr5:25035545-25035589                            | NR_027388:-269           | 1700096K18Rik | PROMOTER               | 0.298                                                        | 0.568                          | 3000.72            | 1704.54            | 0.169                          | 2111.86            | 357.66             |
| A_68_P20366321 | chr1:77511149-77511206                            | NM_007936:486            | Epha4         | INSIDE                 | 0.298                                                        | 0.640                          | 861.99             | 552.09             | 0.191                          | 639.72             | 122.06             |
| A_68_P22187976 | chr3:62407890-62407934                            | NM_177346:1150           | Gpr149        | INSIDE                 | 0.298                                                        | 0.714                          | 1701.46            | 1214.37            | 0.213                          | 1269.21            | 269.94             |
| A_68_P28067855 | chr11:100259055-100259099                         | NM_010593:28             | Jup           | INSIDE                 | 0.298                                                        | 0.567                          | 1550.90            | 879.40             | 0.169                          | 1126.51            | 190.56             |
| A_68_P26068286 | chr8:95379269-95379313                            | NM_173014:42             | Lpcat2        | INSIDE                 | 0.298                                                        | 0.635                          | 3188.41            | 2024.16            | 0.189                          | 2268.79            | 429.12             |
| A_68_P31127333 | chr17:29463770-29463814                           | NM_023734:7966           | Pi16          | INSIDE                 | 0.298                                                        | 0.554                          | 1109.54            | 614.43             | 0.165                          | 771.49             | 127.28             |
| A_68_P20956472 | chr1:196446255-196446299                          | NM_008882:254            | Plxna2        | INSIDE                 | 0.298                                                        | 0.634                          | 1595.91            | 1012.02            | 0.189                          | 1163.51            | 219.86             |
| A_68_P30481816 | chr15:99532450-99532494                           | NM_031842:-245           | Smardc1       | PROMOTER               | 0.298                                                        | 0.641                          | 1203.61            | 771.11             | 0.191                          | 906.16             | 172.95             |
| A_68_P23328078 | chr4:134908468-134908512                          | NM_001130477:639         | Srrm1         | INSIDE                 | 0.298                                                        | 0.722                          | 1561.86            | 1128.40            | 0.215                          | 1225.60            | 263.61             |
| A_68_P22570423 | chr3:138406072-138406116                          | NM_019571:936            | Tspan5        | INSIDE                 | 0.298                                                        | 0.557                          | 5007.03            | 2790.18            | 0.166                          | 3779.51            | 627.44             |
| A_68_P31256670 | chr17:56651120-56651164                           | NM_011483:764            | Znrf4         | INSIDE                 | 0.298                                                        | 0.618                          | 1002.25            | 619.27             | 0.184                          | 778.98             | 143.56             |
| A_68_P26199436 | chr8:119387539-119387583                          |                          |               | Unknown                | 0.298                                                        | 0.553                          | 1498.46            | 827.95             | 0.165                          | 1152.91            | 189.92             |
| A_68_P23611141 | chr5:37420204-37420248                            | ENSMUST00000165557:12659 |               | DOWNSTREAM             | 0.298                                                        | 0.484                          | 1064.67            | 514.90             | 0.144                          | 836.75             | 120.56             |
| A_68_P25010197 | chr7:26180486-26180536                            | NR_015569:78             | 4732471J01Rik | INSIDE                 | 0.297                                                        | 0.409                          | 1377.94            | 563.29             | 0.121                          | 1038.30            | 126.07             |
| A_68_P25509654 | chr7:135381359-135381407                          | NM_177001:163            | 9130023H24Rik | INSIDE                 | 0.297                                                        | 0.455                          | 3341.32            | 1521.88            | 0.135                          | 2245.49            | 303.74             |
| A_68_P21763873 | chr2:154899789-154899833                          | NM_016661:423            | Ahey          | INSIDE                 | 0.297                                                        | 0.646                          | 938.05             | 605.85             | 0.192                          | 870.33             | 166.71             |
| A_68_P27981860 | chr11:85048235-85048279                           | NM_025825:366            | Appbp2        | INSIDE                 | 0.297                                                        | 0.566                          | 1614.72            | 914.38             | 0.168                          | 1238.42            | 208.60             |
| A_68_P31152216 | chr17:34256835-34256882                           | NR_037970:-13            | Brd2          | PROMOTER               | 0.297                                                        | 0.664                          | 1305.39            | 866.95             | 0.197                          | 878.61             | 173.17             |
| A_68_P26811951 | chr9:107838581-107838626                          | NM_145621:353            | Camkv         | INSIDE                 | 0.297                                                        | 0.469                          | 1168.01            | 548.13             | 0.139                          | 860.37             | 119.89             |
| A_68_P31932216 | chr19:6015590-6015634                             | NM_007600:-365           | Capn1         | PROMOTER               | 0.297                                                        | 0.502                          | 2108.34            | 1058.29            | 0.149                          | 1674.37            | 249.26             |
| A_68_P30431389 | chr15:90510273-90510317                           | NM_025815:-475           | Cpne8         | PROMOTER               | 0.297                                                        | 0.635                          | 897.45             | 569.88             | 0.189                          | 639.64             | 120.75             |
| A_68_P26350219 | chr9:21855638-21855682                            | NM_010487:807            | Elavl3        | INSIDE                 | 0.297                                                        | 0.704                          | 4462.12            | 3140.26            | 0.209                          | 3223.27            | 674.40             |
| A_68_P20332283 | chr1:71699233-71699279                            | NM_010233:489            | Fn1           | INSIDE                 | 0.297                                                        | 0.563                          | 930.89             | 524.18             | 0.167                          | 694.08             | 116.20             |
| A_68_P24816733 | chr6:124690988-124691032                          | NM_013535:87             | Grec10        | INSIDE                 | 0.297                                                        | 0.555                          | 943.86             | 524.02             | 0.165                          | 731.22             | 120.76             |
| A_68_P28066377 | chr11:100006745-100006792                         | NM_008471:465            | Krt19         | INSIDE                 | 0.297                                                        | 0.402                          | 1333.60            | 536.05             | 0.120                          | 1037.15            | 124.01             |
| A_68_P22082267 | chr3:40754901-40754949                            | NM_001040399:372         | Larp1b        | INSIDE                 | 0.297                                                        | 0.561                          | 1498.78            | 841.48             | 0.167                          | 1141.79            | 190.57             |
| A_68_P27996401 | chr11:87630681-87630732                           | NM_080420:8910           | Lpo           | INSIDE                 | 0.297                                                        | 0.421                          | 1352.36            | 569.03             | 0.125                          | 910.85             | 113.94             |
| A_68_P24563511 | chr6:77193808-77193857                            | NM_028880:1122           | Lrrtm1        | INSIDE                 | 0.297                                                        | 0.467                          | 1187.23            | 554.94             | 0.139                          | 858.30             | 119.33             |
| A_68_P26018712 | chr8:86722479-86722523                            | NR_029740:-9916          | Mir23a        | PROMOTER               | 0.297                                                        | 0.641                          | 891.06             | 570.89             | 0.190                          | 782.87             | 148.91             |
| A_68_P29667754 | chr14:65059716-65059760                           | NM_026322:15002          | MsrA          | INSIDE                 | 0.297                                                        | 0.607                          | 853.63             | 518.11             | 0.181                          | 685.33             | 123.71             |
| A_68_P23617866 | chr5:38550212-38550259                            | NM_010942:471            | Nsg1          | INSIDE                 | 0.297                                                        | 0.618                          | 826.48             | 510.65             | 0.183                          | 640.65             | 117.53             |
| A_68_P21096076 | chr2:29107825-29107869                            | NM_133500:-4286          | Ntng2         | PROMOTER               | 0.297                                                        | 0.598                          | 1790.03            | 1071.17            | 0.178                          | 1394.41            | 247.93             |
| A_68_P23184552 | chr4:106136609-106136653                          | NM_153565:300            | Pesk9         | INSIDE                 | 0.297                                                        | 0.606                          | 1091.54            | 661.02             | 0.180                          | 828.68             | 148.97             |
| A_68_P20832748 | chr1:174307013-174307057                          | NM_026234:373            | Pigm          | INSIDE                 | 0.297                                                        | 0.667                          | 1648.01            | 1099.60            | 0.198                          | 1331.03            | 263.79             |
| A_68_P25265835 | chr7:87439504-87439548                            | NM_145150:176            | Prc1          | INSIDE                 | 0.297                                                        | 0.555                          | 1443.64            | 800.97             | 0.165                          | 1176.43            | 193.63             |
| A_68_P27806201 | chr11:53520531-53520577                           | NM_009012:267            | Rad50         | INSIDE                 | 0.297                                                        | 0.617                          | 1174.44            | 724.17             | 0.183                          | 1066.68            | 195.06             |
| A_68_P30572549 | chr16:17209535-17209579                           | NM_001033338:1329        | Rimbp3        | INSIDE                 | 0.297                                                        | 0.528                          | 4076.18            | 2153.37            | 0.157                          | 2939.18            | 460.39             |
| A_68_P25090672 | chr7:52271527-52271571                            | NM_001008422:71          | Scaf1         | INSIDE                 | 0.297                                                        | 0.495                          | 1154.40            | 571.19             | 0.147                          | 814.15             | 119.77             |
| A_68_P31331157 | chr17:71203092-71203136                           | NM_001164074:-242        | Tgif1         | PROMOTER               | 0.297                                                        | 0.622                          | 1196.16            | 744.42             | 0.185                          | 981.70             | 181.46             |
| A_68_P27804179 | chr11:53138214-53138260                           | NM_026479:46             | Zec1c10       | INSIDE                 | 0.297                                                        | 0.393                          | 1423.03            | 559.29             | 0.117                          | 1016.64            | 118.57             |

| ProbeName      | Target position of probe on CpG island microarray | TargetID                | GeneSymbol    | CpG island Description | Ratio of relative methylation (TiO <sub>2</sub> -NP/Vehicle) | Sham group                     |                    |                    | TiO <sub>2</sub> -H group      |                    |                    |
|----------------|---------------------------------------------------|-------------------------|---------------|------------------------|--------------------------------------------------------------|--------------------------------|--------------------|--------------------|--------------------------------|--------------------|--------------------|
|                |                                                   |                         |               |                        |                                                              | Relative methylation (Cy5/Cy3) | Cy3 signal (Input) | Cy5 signal (MeDIP) | Relative methylation (Cy5/Cy3) | Cy3 signal (Input) | Cy5 signal (MeDIP) |
| A_68_P26342786 | chr9:20326146-20326190                            | NM_001082485-305        | Zfp266        | PROMOTER               | 0.297                                                        | 0.434                          | 5985.65            | 2600.73            | 0.129                          | 4200.66            | 542.84             |
| A_68_P21820483 | chr2:164736035-164736086                          | NM_199027:1190          | Zfp335        | INSIDE                 | 0.297                                                        | 0.551                          | 1094.05            | 603.28             | 0.164                          | 734.59             | 120.43             |
| A_68_P32133946 | chr19:44791974-44792031                           |                         |               | Unknown                | 0.297                                                        | 1.535                          | 635.12             | 975.02             | 0.456                          | 484.85             | 221.10             |
| A_68_P21516740 | chr2:109533518-109533562                          | NM_001048142:-179       | Bdnf          | PROMOTER               | 0.296                                                        | 0.561                          | 933.08             | 523.23             | 0.166                          | 766.95             | 127.48             |
| A_68_P25094588 | chr7:52960776-52960821                            | NM_016974:182           | Dbp           | INSIDE                 | 0.296                                                        | 0.354                          | 1557.36            | 551.37             | 0.105                          | 1140.67            | 119.71             |
| A_68_P27171638 | chr10:59414463-59414507                           | NM_029083:34            | Ddit4         | INSIDE                 | 0.296                                                        | 0.266                          | 2024.13            | 537.73             | 0.079                          | 1482.62            | 116.59             |
| A_68_P29615094 | chr14:55545462-55545506                           | NM_010112:141           | Efs           | INSIDE                 | 0.296                                                        | 0.619                          | 1572.86            | 974.21             | 0.183                          | 1139.18            | 208.54             |
| A_68_P21727914 | chr2:147871631-147871680                          | NM_010446:1050          | Foxa2         | INSIDE                 | 0.296                                                        | 0.644                          | 871.17             | 561.09             | 0.191                          | 628.51             | 119.74             |
| A_68_P28989502 | chr13:43398690-43398734                           | NM_001033399:829        | Gfod1         | INSIDE                 | 0.296                                                        | 0.541                          | 2800.65            | 1514.17            | 0.160                          | 1873.14            | 299.96             |
| A_68_P22875166 | chr4:44085073-44085117                            | NM_001190414:451        | Gnc           | INSIDE                 | 0.296                                                        | 0.428                          | 2122.03            | 909.19             | 0.127                          | 1602.89            | 203.35             |
| A_68_P21489523 | chr2:104333403-104333447                          | NM_001145824:1222       | Hipk3         | INSIDE                 | 0.296                                                        | 0.446                          | 1339.26            | 596.69             | 0.132                          | 1022.60            | 134.85             |
| A_68_P29484662 | chr14:27852087-27852131                           | NM_134437:-78           | Il17rd        | PROMOTER               | 0.296                                                        | 0.552                          | 2127.06            | 1175.11            | 0.164                          | 1552.07            | 254.16             |
| A_68_P26884586 | chr9:121550854-121550898                          | NM_026915:-192          | Lyzl4         | DIVERGENT_PROMOTER     | 0.296                                                        | 0.488                          | 2617.71            | 1278.25            | 0.145                          | 1836.94            | 265.46             |
| A_68_P28831282 | chr13:12350227-12350271                           | NM_001081128:19         | Mtr           | INSIDE                 | 0.296                                                        | 0.473                          | 2220.29            | 1050.04            | 0.140                          | 1540.42            | 215.54             |
| A_68_P23120296 | chr4:94645934-94645983                            | NM_177239:-167          | Mysm1         | PROMOTER               | 0.296                                                        | 0.501                          | 1093.13            | 547.24             | 0.148                          | 809.97             | 119.88             |
| A_68_P25507195 | chr7:134913265-134913309                          | NM_198424:-42           | Orai3         | PROMOTER               | 0.296                                                        | 0.416                          | 2043.31            | 849.01             | 0.123                          | 1541.67            | 189.67             |
| A_68_P31655275 | chr18:42555427-42555471                           | NM_138945:1198          | Pou4f3        | INSIDE                 | 0.296                                                        | 0.603                          | 906.72             | 546.45             | 0.179                          | 676.84             | 120.93             |
| A_68_P25048759 | chr7:36119164-36119208                            | NM_027897:-69           | Rhpn2         | PROMOTER               | 0.296                                                        | 0.480                          | 1957.54            | 939.90             | 0.142                          | 1650.02            | 234.47             |
| A_68_P25475987 | chr7:129008610-129008655                          | NM_011325:8             | Senn1b        | INSIDE                 | 0.296                                                        | 0.444                          | 2237.84            | 992.61             | 0.131                          | 1674.89            | 219.88             |
| A_68_P20353582 | chr1:75371730-75371774                            | NM_007463:-119          | Speg          | DIVERGENT_PROMOTER     | 0.296                                                        | 0.693                          | 2142.52            | 1484.62            | 0.205                          | 1623.95            | 333.44             |
| A_68_P29647965 | chr14:61656646-61656690                           | NM_001164155:156        | Tnfrsf19      | INSIDE                 | 0.296                                                        | 0.424                          | 1805.28            | 765.52             | 0.125                          | 1451.09            | 182.03             |
| A_68_P32010024 | chr19:22213827-22213871                           | NM_001035239:242        | Trpm3         | INSIDE                 | 0.296                                                        | 0.576                          | 1073.25            | 617.71             | 0.170                          | 900.06             | 153.11             |
| A_68_P24974297 | chr7:13623923-13623967                            | NM_001168469:-325       | Ube2m         | PROMOTER               | 0.296                                                        | 0.616                          | 967.88             | 596.50             | 0.182                          | 764.16             | 139.33             |
| A_68_P30385944 | chr15:82817919-82817963                           | ENSMUST00000170562:4641 |               | INSIDE                 | 0.296                                                        | 0.710                          | 2401.77            | 1704.86            | 0.210                          | 1866.07            | 392.23             |
| A_68_P26822985 | chr9:110207937-110207981                          | NM_001081381:263        | 2610002117Rik | INSIDE                 | 0.295                                                        | 0.546                          | 2450.33            | 1336.68            | 0.161                          | 1753.18            | 282.25             |
| A_68_P33012180 | chr9_random:57290-57334                           | NR_027950:2620          | 4930526115Rik | DOWNSTREAM             | 0.295                                                        | 0.671                          | 1868.30            | 1253.84            | 0.198                          | 1395.16            | 276.24             |
| A_68_P24007907 | chr5:115569084-115569128                          | NM_007383:216           | Acaads        | INSIDE                 | 0.295                                                        | 0.630                          | 2283.44            | 1438.67            | 0.186                          | 1678.89            | 311.69             |
| A_68_P23294136 | chr4:128639545-128639589                          | NM_172875:95            | Adc           | INSIDE                 | 0.295                                                        | 0.686                          | 6057.50            | 4153.97            | 0.202                          | 4127.09            | 835.52             |
| A_68_P30113930 | chr15:31296769-31296813                           | NM_001164441:724        | Ankrd33b      | INSIDE                 | 0.295                                                        | 0.568                          | 2634.76            | 1497.79            | 0.168                          | 2118.43            | 355.51             |
| A_68_P32795517 | chrX:160347213-160347257                          | NM_026887:143           | Ap1s2         | INSIDE                 | 0.295                                                        | 2.033                          | 1837.35            | 3735.54            | 0.599                          | 901.22             | 540.07             |
| A_68_P21040966 | chr2:18620478-18620522                            | NM_001001334:-148       | BC061194      | PROMOTER               | 0.295                                                        | 0.461                          | 1908.34            | 880.42             | 0.136                          | 1521.56            | 207.18             |
| A_68_P25944440 | chr8:71258901-71258945                            | NM_172753:119           | Csgalnaact1   | INSIDE                 | 0.295                                                        | 0.632                          | 2416.83            | 1526.41            | 0.186                          | 1907.58            | 355.01             |
| A_68_P28914783 | chr13:30077028-30077072                           | NM_010093:882           | E2f3          | INSIDE                 | 0.295                                                        | 0.653                          | 1692.28            | 1105.35            | 0.193                          | 1342.03            | 258.74             |
| A_68_P26986431 | chr10:20067872-20067916                           | NM_027930:270           | Fam54a        | INSIDE                 | 0.295                                                        | 0.482                          | 1155.15            | 557.13             | 0.142                          | 860.19             | 122.49             |
| A_68_P27357056 | chr10:93498664-93498716                           | NM_053072:-55           | Fgd6          | DIVERGENT_PROMOTER     | 0.295                                                        | 0.553                          | 975.06             | 538.97             | 0.163                          | 744.85             | 121.32             |
| A_68_P20294266 | chr1:64784611-64784655                            | NM_001042659:-308       | Fzd5          | PROMOTER               | 0.295                                                        | 0.531                          | 1159.38            | 615.42             | 0.156                          | 868.90             | 135.84             |
| A_68_P24429122 | chr6:48693166-48693210                            | NM_008376:4143          | Gimap1        | INSIDE                 | 0.295                                                        | 1.877                          | 2991.48            | 5614.39            | 0.554                          | 2024.80            | 1121.84            |
| A_68_P28563524 | chr12:79327386-79327430                           | NM_145965:-233          | Gphn          | PROMOTER               | 0.295                                                        | 0.680                          | 1080.98            | 735.04             | 0.201                          | 887.89             | 178.22             |
| A_68_P24129157 | chr5:138612451-138612495                          | NR_029658:-5426         | Mir106b       | PROMOTER               | 0.295                                                        | 0.501                          | 2923.33            | 1464.32            | 0.148                          | 2009.96            | 297.20             |
| A_68_P23579047 | chr5:31916324-31916368                            | NM_025796:23            | Mrp133        | INSIDE                 | 0.295                                                        | 0.611                          | 1447.93            | 884.64             | 0.180                          | 1142.65            | 205.92             |
| A_68_P31331867 | chr17:71340037-71340081                           | NM_023402:-202          | My112b        | PROMOTER               | 0.295                                                        | 0.729                          | 5895.03            | 4299.37            | 0.215                          | 4404.46            | 949.13             |
| A_68_P23199842 | chr4:108874395-108874439                          | NM_133885:461           | Osbp19        | INSIDE                 | 0.295                                                        | 0.672                          | 3598.78            | 2417.08            | 0.198                          | 2579.37            | 511.68             |
| A_68_P28940998 | chr13:34966207-34966251                           | NM_013830:-1134         | Prpf4b        | PROMOTER               | 0.295                                                        | 0.510                          | 3080.41            | 1569.79            | 0.150                          | 2126.73            | 319.29             |
| A_68_P31256438 | chr17:56615517-56615561                           | NM_011218:365           | Ptprs         | INSIDE                 | 0.295                                                        | 0.397                          | 1320.98            | 524.04             | 0.117                          | 1033.69            | 120.88             |
| A_68_P30132017 | chr15:35085586-35085630                           | NM_019635:-47           | Stk3          | PROMOTER               | 0.295                                                        | 0.488                          | 4603.04            | 2246.98            | 0.144                          | 3782.78            | 544.91             |
| A_68_P25701519 | chr8:18950799-18950843                            | NM_001113350:153        | Xkr5          | INSIDE                 | 0.295                                                        | 0.550                          | 1900.50            | 1045.48            | 0.162                          | 1597.83            | 258.98             |
| A_68_P21749218 | chr2:152239987-152240031                          | NM_175126:772           | Zcchc3        | INSIDE                 | 0.295                                                        | 0.353                          | 1958.83            | 690.72             | 0.104                          | 1453.63            | 151.39             |
| A_68_P25089142 | chr7:52003877-52003921                            | NM_178734:89            | Zfp473        | INSIDE                 | 0.295                                                        | 0.530                          | 1007.57            | 533.75             | 0.156                          | 772.53             | 120.81             |
| A_68_P21782538 | chr2:158186969-158187016                          | NR_015463:253           | 9430008C03Rik | INSIDE                 | 0.294                                                        | 0.433                          | 1475.14            | 638.46             | 0.127                          | 1038.55            | 132.14             |
| A_68_P23299521 | chr4:129662643-129662687                          | NM_001199696:343        | Bai2          | INSIDE                 | 0.294                                                        | 0.677                          | 1184.37            | 801.57             | 0.199                          | 840.45             | 167.23             |
| A_68_P27315615 | chr10:86168388-86168432                           | NM_001003939:-145       | BC030307      | DIVERGENT_PROMOTER     | 0.294                                                        | 0.445                          | 1172.76            | 521.83             | 0.131                          | 927.24             | 121.32             |



| ProbeName      | Target position of probe on CpG island microarray | TargetID                | GeneSymbol    | CpG island Description | Ratio of relative methylation (TiO <sub>2</sub> -NP/Vehicle) | Sham group                     |                    |                    | TiO <sub>2</sub> -H group      |                    |                    |
|----------------|---------------------------------------------------|-------------------------|---------------|------------------------|--------------------------------------------------------------|--------------------------------|--------------------|--------------------|--------------------------------|--------------------|--------------------|
|                |                                                   |                         |               |                        |                                                              | Relative methylation (Cy5/Cy3) | Cy3 signal (Input) | Cy5 signal (MeDIP) | Relative methylation (Cy5/Cy3) | Cy3 signal (Input) | Cy5 signal (MeDIP) |
| A_68_P26790789 | chr9:104165231-104165275                          | NM_001163026:8          | Dnajc13       | INSIDE                 | 0.294                                                        | 0.439                          | 2216.01            | 973.37             | 0.129                          | 1782.78            | 230.03             |
| A_68_P32315762 | chrX:33428641-33428685                            | NM_001009947:-164       | Dock11        | PROMOTER               | 0.294                                                        | 1.708                          | 1636.37            | 2794.21            | 0.503                          | 769.78             | 386.90             |
| A_68_P23202063 | chr4:109349653-109349697                          | NM_007983:443           | Faf1          | INSIDE                 | 0.294                                                        | 0.447                          | 2022.94            | 904.09             | 0.131                          | 1611.81            | 211.86             |
| A_68_P24607724 | chr6:85978997-85979041                            | NM_012013:11834         | Figla         | DOWNSTREAM             | 0.294                                                        | 0.395                          | 1372.49            | 541.51             | 0.116                          | 1018.25            | 118.25             |
| A_68_P29329254 | chr13:112280052-112280096                         | NM_001122963:175        | Gpbp1         | INSIDE                 | 0.294                                                        | 1.470                          | 5825.93            | 8562.02            | 0.432                          | 3881.47            | 1675.84            |
| A_68_P27924588 | chr11:74982421-74982465                           | NM_001098203:-788       | Hic1          | PROMOTER               | 0.294                                                        | 0.429                          | 2116.45            | 908.35             | 0.126                          | 1711.04            | 216.24             |
| A_68_P26809702 | chr9:107483108-107483152                          | NM_178020:-496          | Hyal3         | PROMOTER               | 0.294                                                        | 0.647                          | 961.49             | 622.42             | 0.190                          | 705.09             | 134.26             |
| A_68_P21569912 | chr2:119303420-119303464                          | NM_026574:-77           | Ino80         | PROMOTER               | 0.294                                                        | 0.436                          | 3829.81            | 1671.27            | 0.128                          | 2908.06            | 373.43             |
| A_68_P27894946 | chr11:69224331-69224375                           | NM_001017426:2825       | Kdm6b         | INSIDE                 | 0.294                                                        | 1.983                          | 6938.02            | 13758.22           | 0.582                          | 4494.01            | 2616.74            |
| A_68_P31545963 | chr18:21811255-21811299                           | NM_001081403:-407       | Klh14         | PROMOTER               | 0.294                                                        | 0.461                          | 1899.45            | 876.38             | 0.136                          | 1439.61            | 195.37             |
| A_68_P30498285 | chr15:102340830-102340876                         | NM_001163643:6583       | Map3k12       | INSIDE                 | 0.294                                                        | 0.625                          | 860.46             | 537.87             | 0.183                          | 666.50             | 122.30             |
| A_68_P23985671 | chr5:111848092-111848136                          | NM_001081235:929        | Mn1           | INSIDE                 | 0.294                                                        | 0.648                          | 3672.91            | 2380.26            | 0.191                          | 2489.23            | 474.22             |
| A_68_P30346947 | chr15:76059642-76059686                           | NM_201385:263           | Plec          | INSIDE                 | 0.294                                                        | 0.451                          | 1296.40            | 584.06             | 0.132                          | 922.68             | 122.12             |
| A_68_P25093690 | chr7:52793837-52793881                            | NM_148927:12159         | Plekha4       | INSIDE                 | 0.294                                                        | 0.540                          | 1520.91            | 820.86             | 0.159                          | 1147.84            | 182.08             |
| A_68_P31918147 | chr19:3575682-3575726                             | NM_001164159:45         | Ppp6r3        | INSIDE                 | 0.294                                                        | 0.652                          | 4055.20            | 2645.44            | 0.192                          | 2867.08            | 549.30             |
| A_68_P21831536 | chr2:166539405-166539449                          | NM_177782:-94           | Prex1         | PROMOTER               | 0.294                                                        | 2.047                          | 14771.77           | 30234.45           | 0.602                          | 9815.80            | 5904.42            |
| A_68_P24119440 | chr5:136578358-136578403                          | NM_133914:18595         | Rasa4         | INSIDE                 | 0.294                                                        | 0.548                          | 1458.41            | 798.68             | 0.161                          | 1075.99            | 172.99             |
| A_68_P28956734 | chr13:37918572-37918616                           | NM_001177868:-186       | Rreb1         | PROMOTER               | 0.294                                                        | 0.423                          | 4304.25            | 1818.77            | 0.124                          | 3030.87            | 376.08             |
| A_68_P30463774 | chr15:96291694-96291742                           | NM_028148:-444          | Scaf11        | PROMOTER               | 0.294                                                        | 0.501                          | 1219.43            | 610.39             | 0.147                          | 812.36             | 119.44             |
| A_68_P28535264 | chr12:74146664-74146708                           | NM_009189:1013          | Six1          | INSIDE                 | 0.294                                                        | 0.589                          | 1124.15            | 662.40             | 0.173                          | 841.12             | 145.60             |
| A_68_P27082611 | chr10:39861509-39861553                           | NM_00114332:530         | Slc16a10      | INSIDE                 | 0.294                                                        | 0.612                          | 888.49             | 543.96             | 0.180                          | 686.30             | 123.72             |
| A_68_P23542947 | chr5:24104268-24104313                            | NM_025891:3530          | Smarcd3       | INSIDE                 | 0.294                                                        | 0.462                          | 1776.32            | 820.22             | 0.136                          | 1418.76            | 192.66             |
| A_68_P21328878 | chr2:72817077-72817121                            | NM_001098425:240        | Sp3           | INSIDE                 | 0.294                                                        | 0.405                          | 3871.91            | 1567.02            | 0.119                          | 2908.63            | 345.72             |
| A_68_P29116720 | chr13:69750085-69750129                           | NM_175283:235           | Srd5a1        | INSIDE                 | 0.294                                                        | 0.327                          | 1824.07            | 596.40             | 0.096                          | 1215.67            | 116.70             |
| A_68_P32340127 | chrX:39265129-39265173                            | NM_001033422:-72        | Thoc2         | PROMOTER               | 0.294                                                        | 2.007                          | 3746.06            | 7518.66            | 0.590                          | 1500.11            | 884.89             |
| A_68_P26465329 | chr9:43851804-43851848                            | NM_009382:360           | Thy1          | INSIDE                 | 0.294                                                        | 0.683                          | 1981.00            | 1352.86            | 0.201                          | 1441.04            | 289.23             |
| A_68_P32289749 | chrX:20281744-20281788                            | NM_145628:732           | Usp11         | INSIDE                 | 0.294                                                        | 1.410                          | 2905.22            | 4097.29            | 0.415                          | 1322.34            | 549.07             |
| A_68_P25505268 | chr7:134488780-134488824                          | NM_146202:26            | Zfp768        | INSIDE                 | 0.294                                                        | 0.541                          | 5020.78            | 2714.09            | 0.159                          | 3484.95            | 553.49             |
| A_68_P26710503 | chr9:88418332-88418377                            | ENSMUST00000034997:-633 |               | PROMOTER               | 0.294                                                        | 0.533                          | 1182.90            | 630.60             | 0.157                          | 966.47             | 151.49             |
| A_68_P24975023 | chr7:13863906-13863950                            | NM_177312:142           | 6330408A02Rik | INSIDE                 | 0.293                                                        | 0.622                          | 2851.13            | 1773.84            | 0.182                          | 2030.50            | 369.65             |
| A_68_P22765602 | chr4:19496630-19496674                            | NM_027769:599           | Cpne3         | INSIDE                 | 0.293                                                        | 0.649                          | 793.67             | 514.74             | 0.190                          | 700.35             | 132.94             |
| A_68_P26585431 | chr9:64880028-64880087                            | NM_028906:-207          | Dpp8          | PROMOTER               | 0.293                                                        | 0.440                          | 1159.20            | 509.86             | 0.129                          | 948.77             | 122.08             |
| A_68_P21129653 | chr2:34627681-34627725                            | NM_001163434:93         | Hspa5         | INSIDE                 | 0.293                                                        | 0.620                          | 2180.82            | 1351.86            | 0.182                          | 1776.45            | 322.79             |
| A_68_P20453278 | chr1:94998327-94998371                            | NM_001110315:94         | Kif1a         | INSIDE                 | 0.293                                                        | 0.550                          | 2648.99            | 1458.18            | 0.161                          | 1809.39            | 291.67             |
| A_68_P31784508 | chr18:66162318-66162362                           | NM_027400:-51           | Lman1         | PROMOTER               | 0.293                                                        | 0.509                          | 1077.33            | 548.48             | 0.149                          | 878.66             | 130.92             |
| A_68_P27535211 | chr10:126748493-126748537                         | NM_001003913:328        | Mars          | INSIDE                 | 0.293                                                        | 0.523                          | 4633.52            | 2422.92            | 0.153                          | 3347.90            | 513.77             |
| A_68_P29612399 | chr14:55051483-55051527                           | NM_008608:1064          | Mmp14         | INSIDE                 | 0.293                                                        | 0.657                          | 2064.39            | 1357.11            | 0.193                          | 1585.31            | 305.40             |
| A_68_P28831283 | chr13:12350347-12350391                           | NM_001081128:-101       | Mtr           | PROMOTER               | 0.293                                                        | 0.527                          | 1009.78            | 532.47             | 0.155                          | 763.32             | 117.96             |
| A_68_P22310998 | chr3:87774969-87775013                            | NM_016701:-24           | Nes           | PROMOTER               | 0.293                                                        | 0.474                          | 2870.67            | 1359.97            | 0.139                          | 2059.17            | 285.72             |
| A_68_P26021880 | chr8:87308048-87308097                            | NM_001081981:-9804      | Nfix          | PROMOTER               | 0.293                                                        | 0.697                          | 1850.78            | 1289.55            | 0.204                          | 1327.75            | 271.33             |
| A_68_P28049717 | chr11:97141114-97141159                           | NM_008942:754           | Npepps        | INSIDE                 | 0.293                                                        | 1.593                          | 6250.36            | 9956.81            | 0.467                          | 4024.92            | 1879.83            |
| A_68_P22393105 | chr3:104583807-104583851                          | NM_027982:-145          | Ppm1j         | DIVERGENT_PROMOTER     | 0.293                                                        | 0.463                          | 1284.55            | 594.17             | 0.135                          | 951.62             | 128.90             |
| A_68_P24834763 | chr6:127718286-127718330                          | NM_201371:439           | Prmt8         | INSIDE                 | 0.293                                                        | 0.528                          | 1007.47            | 531.79             | 0.155                          | 788.32             | 122.03             |
| A_68_P24170392 | chr5:147657058-147657102                          | NM_026864:434           | Ras11a        | INSIDE                 | 0.293                                                        | 0.666                          | 1475.99            | 983.08             | 0.195                          | 1211.41            | 236.39             |
| A_68_P28172265 | chr11:118430608-118430652                         | NM_001024931:340256     | Rbfox3        | INSIDE                 | 0.293                                                        | 0.490                          | 1592.34            | 780.22             | 0.143                          | 1158.14            | 166.16             |
| A_68_P23893504 | chr5:92738668-92738712                            | NM_172713:360           | Sdad1         | INSIDE                 | 0.293                                                        | 0.723                          | 2304.22            | 1666.04            | 0.212                          | 1683.50            | 357.23             |
| A_68_P32036095 | chr19:26682223-26682267                           | NM_011416:2595          | Smarca2       | INSIDE                 | 0.293                                                        | 0.657                          | 1770.36            | 1162.95            | 0.192                          | 1363.01            | 261.99             |
| A_68_P22958421 | chr4:59819390-59819434                            | NM_172468:891           | Snx30         | INSIDE                 | 0.293                                                        | 0.701                          | 1625.10            | 1138.38            | 0.205                          | 1357.73            | 278.35             |
| A_68_P31104791 | chr17:25707616-25707662                           | NM_011447:-7            | Sox8          | DIVERGENT_PROMOTER     | 0.293                                                        | 0.529                          | 1282.74            | 678.92             | 0.155                          | 1010.72            | 156.57             |
| A_68_P28070590 | chr11:100721997-100722041                         | NM_001164062:221        | Stat5a        | INSIDE                 | 0.293                                                        | 0.592                          | 1196.98            | 709.14             | 0.173                          | 945.49             | 164.00             |
| A_68_P25728415 | chr8:26787130-26787174                            | NM_001081269:36397      | Whsc111       | INSIDE                 | 0.293                                                        | 1.637                          | 516.31             | 845.41             | 0.479                          | 525.16             | 251.72             |

| ProbeName      | Target position of probe on CpG island microarray | TargetID                 | GeneSymbol    | CpG island Description | Ratio of relative methylation (TiO <sub>2</sub> -NP/Vehicle) | Sham group                     |                    |                    | TiO <sub>2</sub> -H group      |                    |                    |
|----------------|---------------------------------------------------|--------------------------|---------------|------------------------|--------------------------------------------------------------|--------------------------------|--------------------|--------------------|--------------------------------|--------------------|--------------------|
|                |                                                   |                          |               |                        |                                                              | Relative methylation (Cy5/Cy3) | Cy3 signal (Input) | Cy5 signal (MeDIP) | Relative methylation (Cy5/Cy3) | Cy3 signal (Input) | Cy5 signal (MeDIP) |
| A_68_P29063254 | chr13:56854688-56854732                           | AK131829:478             |               | INSIDE                 | 0.293                                                        | 0.469                          | 1402.36            | 658.19             | 0.137                          | 1260.98            | 173.38             |
| A_68_P27776267 | chr11:47801865-47801909                           | ENSMUST00000128558:585   |               | INSIDE                 | 0.293                                                        | 0.659                          | 1202.52            | 792.78             | 0.193                          | 943.05             | 182.10             |
| A_68_P28743981 | chr12:112661620-112661664                         | NM_028807:6002           | 1200009I06Rik | INSIDE                 | 0.292                                                        | 0.533                          | 994.97             | 530.58             | 0.156                          | 775.75             | 120.64             |
| A_68_P26920089 | chr10:7383225-7383269                             | NR_030698:78             | A630066F11Rik | INSIDE                 | 0.292                                                        | 0.506                          | 2660.02            | 1345.58            | 0.148                          | 2036.56            | 300.51             |
| A_68_P26397645 | chr9:30729921-30729965                            | NM_001024139:95          | Adams15       | INSIDE                 | 0.292                                                        | 0.587                          | 2655.06            | 1559.55            | 0.172                          | 1935.71            | 332.19             |
| A_68_P25700847 | chr8:18846041-18846085                            | NM_026792:-216           | Agpat5        | PROMOTER               | 0.292                                                        | 0.411                          | 1275.85            | 524.29             | 0.120                          | 1017.50            | 121.91             |
| A_68_P26913680 | chr10:6079737-6079781                             | NM_031185:454            | Akap12        | INSIDE                 | 0.292                                                        | 0.593                          | 2600.83            | 1542.13            | 0.173                          | 2115.32            | 366.03             |
| A_68_P23882635 | chr5:90794338-90794382                            | NM_030886:851            | Ankrd17       | INSIDE                 | 0.292                                                        | 0.690                          | 3054.67            | 2107.60            | 0.202                          | 2236.75            | 451.10             |
| A_68_P25429189 | chr7:120351704-120351748                          | NM_007489:748            | Arntl         | INSIDE                 | 0.292                                                        | 0.529                          | 1000.70            | 529.57             | 0.155                          | 829.35             | 128.15             |
| A_68_P25585263 | chr7:148042305-148042349                          | NM_018742:-44            | Bet11         | DIVERGENT_PROMOTER     | 0.292                                                        | 0.591                          | 2650.92            | 1565.37            | 0.172                          | 2027.12            | 349.16             |
| A_68_P28453879 | chr12:56937597-56937641                           | NM_001037756:266         | Brms11        | INSIDE                 | 0.292                                                        | 0.517                          | 3907.17            | 2021.34            | 0.151                          | 2900.31            | 438.81             |
| A_68_P21221048 | chr2:52531254-52531298                            | NM_001037099:825         | Cacnb4        | INSIDE                 | 0.292                                                        | 0.484                          | 1120.73            | 542.76             | 0.141                          | 907.44             | 128.19             |
| A_68_P27479232 | chr10:116500293-116500343                         | NM_007636:552            | Cet2          | INSIDE                 | 0.292                                                        | 0.702                          | 1693.56            | 1188.50            | 0.205                          | 1169.03            | 239.89             |
| A_68_P32121691 | chr19:42593347-42593391                           | NM_177464:74             | D19Ert4386c   | INSIDE                 | 0.292                                                        | 0.582                          | 2611.01            | 1518.40            | 0.170                          | 1878.54            | 318.97             |
| A_68_P28737548 | chr12:111517382-111517429                         | NM_172119:-34            | Dio3          | DIVERGENT_PROMOTER     | 0.292                                                        | 0.621                          | 840.39             | 522.19             | 0.182                          | 664.86             | 120.84             |
| A_68_P21585577 | chr2:122124337-122124381                          | NM_025777:-277           | Duoxa2        | DIVERGENT_PROMOTER     | 0.292                                                        | 0.597                          | 901.23             | 537.78             | 0.174                          | 691.95             | 120.45             |
| A_68_P27554562 | chr11:3795169-3795213                             | NM_173745:-52            | Dusp18        | DIVERGENT_PROMOTER     | 0.292                                                        | 0.588                          | 1725.53            | 1014.44            | 0.172                          | 1300.49            | 223.61             |
| A_68_P22369562 | chr3:100293420-100293464                          | NM_001142952:-327        | Fam46c        | PROMOTER               | 0.292                                                        | 0.710                          | 1428.78            | 1014.97            | 0.207                          | 1178.39            | 244.24             |
| A_68_P23807224 | chr5:75471627-75471671                            | NM_133256:23             | Gsx2          | INSIDE                 | 0.292                                                        | 0.511                          | 2343.80            | 1198.27            | 0.149                          | 1839.49            | 274.26             |
| A_68_P26812406 | chr9:107905251-107905295                          | NM_013785:294            | Ip6k1         | INSIDE                 | 0.292                                                        | 0.362                          | 1542.06            | 558.32             | 0.106                          | 1152.15            | 121.73             |
| A_68_P24142813 | chr5:141177968-141178012                          | NM_028833:342            | Iqcc          | INSIDE                 | 0.292                                                        | 0.567                          | 1355.69            | 769.13             | 0.166                          | 1178.25            | 195.26             |
| A_68_P27947413 | chr11:78959127-78959171                           | NM_013571:708            | Ksr1          | INSIDE                 | 0.292                                                        | 0.652                          | 3720.80            | 2427.69            | 0.190                          | 2729.19            | 519.38             |
| A_68_P23956961 | chr5:106161428-106161472                          | NM_178701:31622          | Lrrc8d        | INSIDE                 | 0.292                                                        | 1.627                          | 5444.91            | 8860.01            | 0.475                          | 3636.37            | 1726.04            |
| A_68_P21550149 | chr2:115888052-115888096                          | NM_001159569:2283        | Meis2         | INSIDE                 | 0.292                                                        | 0.513                          | 1690.71            | 867.77             | 0.150                          | 1157.09            | 173.65             |
| A_68_P23265180 | chr4:123581921-123581965                          | NM_019660:-313           | Mycbp         | PROMOTER               | 0.292                                                        | 0.604                          | 2027.64            | 1224.95            | 0.177                          | 1616.30            | 285.42             |
| A_68_P21485380 | chr2:103601403-103601448                          | NM_153126:-18            | Nat10         | PROMOTER               | 0.292                                                        | 0.351                          | 1473.67            | 517.41             | 0.102                          | 1179.32            | 120.82             |
| A_68_P26373646 | chr9:26838450-26838494                            | NM_178113:713            | Neapd3        | INSIDE                 | 0.292                                                        | 0.575                          | 1380.17            | 793.06             | 0.168                          | 1032.90            | 173.47             |
| A_68_P32140280 | chr19:45823401-45823445                           | NM_008723:631            | Npm3          | INSIDE                 | 0.292                                                        | 0.529                          | 1686.66            | 892.00             | 0.154                          | 1223.51            | 188.69             |
| A_68_P29437679 | chr14:19071747-19071791                           | NM_011584:-148           | Nr1d2         | PROMOTER               | 0.292                                                        | 1.714                          | 1886.57            | 3233.78            | 0.501                          | 1321.71            | 662.59             |
| A_68_P22422579 | chr3:109946712-109946764                          | NM_001163348:-348        | Ntng1         | PROMOTER               | 0.292                                                        | 0.564                          | 929.84             | 524.30             | 0.164                          | 728.06             | 119.75             |
| A_68_P31062919 | chr17:15098706-15098750                           | NM_024250:-491           | Pfhf10        | PROMOTER               | 0.292                                                        | 1.357                          | 6416.10            | 8704.67            | 0.397                          | 4682.72            | 1856.94            |
| A_68_P32141867 | chr19:46131714-46131758                           | NM_001081214:708         | Pprec1        | INSIDE                 | 0.292                                                        | 0.549                          | 3380.16            | 1854.29            | 0.160                          | 2755.75            | 441.96             |
| A_68_P31117588 | chr17:27771794-27771838                           | NM_025963:371            | Rps10         | INSIDE                 | 0.292                                                        | 0.554                          | 999.66             | 554.01             | 0.162                          | 735.73             | 119.24             |
| A_68_P32775570 | chrX:156065828-156065872                          | NM_001135727:511         | Sh3kbp1       | INSIDE                 | 0.292                                                        | 1.517                          | 2708.20            | 4109.38            | 0.443                          | 1044.62            | 462.77             |
| A_68_P25908463 | chr8:63702506-63702553                            | NM_021506:-438           | Sh3rf1        | PROMOTER               | 0.292                                                        | 0.459                          | 1306.91            | 599.66             | 0.134                          | 1163.87            | 156.17             |
| A_68_P20005839 | chr1:4487234-4487278                              | NM_011441:-762           | Sox17         | PROMOTER               | 0.292                                                        | 0.467                          | 1142.06            | 533.59             | 0.137                          | 911.72             | 124.50             |
| A_68_P25307027 | chr7:96487209-96487253                            | NM_028343:67             | Tmem135       | INSIDE                 | 0.292                                                        | 0.414                          | 3962.50            | 1640.35            | 0.121                          | 3189.47            | 386.18             |
| A_68_P22728289 | chr4:11083171-11083217                            | NM_001199105:-393        | Trp53inp1     | PROMOTER               | 0.292                                                        | 0.528                          | 1082.70            | 572.05             | 0.155                          | 783.13             | 121.02             |
| A_68_P23185865 | chr4:106351237-106351283                          | NM_001172073:31          | Tte4          | INSIDE                 | 0.292                                                        | 0.596                          | 911.39             | 542.97             | 0.174                          | 694.48             | 121.01             |
| A_68_P28694456 | chr12:104187580-104187626                         | NM_001081017:534         | Unc97         | INSIDE                 | 0.292                                                        | 0.413                          | 1388.25            | 573.76             | 0.121                          | 1017.38            | 122.81             |
| A_68_P26038378 | chr8:90485888-90485932                            | NM_033327:-2416          | Zfp423        | PROMOTER               | 0.292                                                        | 0.628                          | 2432.62            | 1528.64            | 0.183                          | 1809.04            | 331.51             |
| A_68_P21579347 | chr2:120996224-120996271                          | NM_178889:638            | Zscan29       | INSIDE                 | 0.292                                                        | 0.364                          | 1531.16            | 556.88             | 0.106                          | 1135.92            | 120.64             |
| A_68_P31801899 | chr18:69358377-69358422                           | AK080553:625             |               | INSIDE                 | 0.292                                                        | 0.667                          | 1113.72            | 742.71             | 0.195                          | 949.58             | 184.96             |
| A_68_P21109229 | chr2:31315525-31315569                            | ENSMUST00000142448:13292 |               | INSIDE                 | 0.292                                                        | 0.651                          | 4225.22            | 2750.87            | 0.190                          | 3018.17            | 574.58             |
| A_68_P31833165 | chr18:74938885-74938929                           | NM_177470:41             | Acaa2         | INSIDE                 | 0.291                                                        | 0.576                          | 3477.89            | 2001.80            | 0.168                          | 2416.86            | 404.97             |
| A_68_P22858339 | chr4:40650160-40650206                            | NM_025545:-233           | Aptx          | PROMOTER               | 0.291                                                        | 0.556                          | 3699.17            | 2057.41            | 0.162                          | 2715.18            | 439.07             |
| A_68_P21073893 | chr2:25562488-25562532                            | NM_023326:112            | Bmyc          | INSIDE                 | 0.291                                                        | 0.518                          | 2191.14            | 1134.96            | 0.151                          | 1771.29            | 267.16             |
| A_68_P30793143 | chr16:58728472-58728525                           | NM_171826:342            | Cldnd1        | INSIDE                 | 0.291                                                        | 0.516                          | 1065.71            | 549.69             | 0.150                          | 790.94             | 118.52             |
| A_68_P27998412 | chr11:88007125-88007169                           | NM_001172099:24080       | Cuedc1        | INSIDE                 | 0.291                                                        | 1.632                          | 1600.20            | 2611.79            | 0.474                          | 1254.77            | 595.27             |
| A_68_P26240284 | chr8:126038626-126038670                          | NM_001170976:707         | Dbndd1        | INSIDE                 | 0.291                                                        | 0.626                          | 2142.22            | 1340.42            | 0.182                          | 1685.82            | 306.92             |
| A_68_P28593179 | chr12:84861421-84861470                           | NM_001165256:-5553       | Deaf4         | PROMOTER               | 0.291                                                        | 0.541                          | 1017.28            | 550.51             | 0.157                          | 825.27             | 129.77             |

| ProbeName      | Target position of probe on CpG island microarray | TargetID               | GeneSymbol    | CpG island Description | Ratio of relative methylation (TiO <sub>2</sub> -NP/Vehicle) | Sham group                     |                    |                    | TiO <sub>2</sub> -H group      |                    |                    |
|----------------|---------------------------------------------------|------------------------|---------------|------------------------|--------------------------------------------------------------|--------------------------------|--------------------|--------------------|--------------------------------|--------------------|--------------------|
|                |                                                   |                        |               |                        |                                                              | Relative methylation (Cy5/Cy3) | Cy3 signal (Input) | Cy5 signal (MeDIP) | Relative methylation (Cy5/Cy3) | Cy3 signal (Input) | Cy5 signal (MeDIP) |
| A_68_P30648665 | chr16:31663764-31663808                           | NM_007862:338          | Dlg1          | PROMOTER               | 0.291                                                        | 0.436                          | 1220.85            | 532.57             | 0.127                          | 933.67             | 118.67             |
| A_68_P28962021 | chr13:38750788-38750832                           | NM_025380:87           | Eef1e1        | INSIDE                 | 0.291                                                        | 0.640                          | 1197.51            | 766.37             | 0.186                          | 937.50             | 174.80             |
| A_68_P20091639 | chr1:24106505-24106549                            | NM_026604:654          | Fam135a       | INSIDE                 | 0.291                                                        | 0.529                          | 1272.08            | 672.54             | 0.154                          | 1041.98            | 160.09             |
| A_68_P32920574 | chr13:50513406-50513450                           | NM_175401:183          | Fbxw17        | INSIDE                 | 0.291                                                        | 0.407                          | 1725.21            | 703.01             | 0.119                          | 1387.43            | 164.75             |
| A_68_P24173495 | chr5:148211661-148211705                          | NM_010229:383          | Flt3          | INSIDE                 | 0.291                                                        | 0.651                          | 1303.31            | 848.05             | 0.189                          | 1103.09            | 208.52             |
| A_68_P25089992 | chr7:52151653-52151697                            | NM_027376:226          | Fuz           | INSIDE                 | 0.291                                                        | 0.609                          | 1832.41            | 1115.85            | 0.178                          | 1331.80            | 236.40             |
| A_68_P20264196 | chr1:59540370-59540414                            | NM_008057:1402         | Fzd7          | INSIDE                 | 0.291                                                        | 0.647                          | 4951.91            | 3202.58            | 0.188                          | 3716.89            | 699.77             |
| A_68_P28553835 | chr12:77507209-77507257                           | NM_008301:1876         | Hspa2         | INSIDE                 | 0.291                                                        | 0.577                          | 2070.19            | 1195.39            | 0.168                          | 1492.84            | 250.92             |
| A_68_P24334773 | chr6:30907971-30908017                            | NM_001135093:996       | Klfl4         | INSIDE                 | 0.291                                                        | 0.529                          | 1220.51            | 645.44             | 0.154                          | 916.79             | 140.84             |
| A_68_P27535212 | chr10:126748563-126748607                         | NM_001003913:258       | Mars          | INSIDE                 | 0.291                                                        | 0.641                          | 1250.46            | 802.14             | 0.187                          | 1011.00            | 188.76             |
| A_68_P29701300 | chr14:70843636-70843680                           | NR_029802:342          | Mir320        | DOWNSTREAM             | 0.291                                                        | 0.415                          | 1340.23            | 556.11             | 0.121                          | 1026.45            | 123.74             |
| A_68_P27838143 | chr11:59475883-59475927                           | NM_012027:-92          | Mrip          | PROMOTER               | 0.291                                                        | 0.608                          | 848.32             | 515.51             | 0.177                          | 678.35             | 119.82             |
| A_68_P24161584 | chr5:145307316-145307360                          | NM_016789:583          | Nptx2         | INSIDE                 | 0.291                                                        | 0.593                          | 925.50             | 548.83             | 0.173                          | 691.26             | 119.32             |
| A_68_P22705746 | chr4:6380618-6380662                              | NM_010945:778          | Nsmf          | INSIDE                 | 0.291                                                        | 0.598                          | 1501.04            | 897.31             | 0.174                          | 1239.58            | 215.96             |
| A_68_P21495957 | chr2:105515455-105515507                          | NM_013627:-1121        | Pax6          | DIVERGENT_PROMOTER     | 0.291                                                        | 0.604                          | 1261.47            | 761.99             | 0.176                          | 908.46             | 159.49             |
| A_68_P28083253 | chr11:102941713-102941757                         | NM_152813:21238        | Plcd3         | INSIDE                 | 0.291                                                        | 0.571                          | 954.33             | 545.03             | 0.166                          | 734.64             | 122.25             |
| A_68_P28055837 | chr11:98210403-98210447                           | NM_144828:373          | Ppp1r1b       | INSIDE                 | 0.291                                                        | 0.565                          | 4091.51            | 2311.88            | 0.164                          | 2917.39            | 479.12             |
| A_68_P26809514 | chr9:107456460-107456504                          | NM_019713:-504         | Rassf1        | PROMOTER               | 0.291                                                        | 0.569                          | 1935.92            | 1101.47            | 0.166                          | 1313.80            | 217.82             |
| A_68_P22286829 | chr3:83568459-83568506                            | NM_009144:-1760        | Sfrp2         | PROMOTER               | 0.291                                                        | 0.395                          | 1409.56            | 556.86             | 0.115                          | 1077.22            | 124.04             |
| A_68_P28050118 | chr11:97224447-97224491                           | NM_138657:604          | Socs7         | INSIDE                 | 0.291                                                        | 0.494                          | 1273.59            | 629.35             | 0.144                          | 1088.65            | 156.52             |
| A_68_P31931515 | chr19:5893867-5893911                             | NM_198634:219          | Tigd3         | INSIDE                 | 0.291                                                        | 0.584                          | 1366.26            | 798.07             | 0.170                          | 1106.96            | 187.96             |
| A_68_P30374042 | chr15:80542447-80542491                           | NM_144812:726          | Tnrc6b        | INSIDE                 | 0.291                                                        | 0.565                          | 2485.99            | 1404.12            | 0.164                          | 1757.12            | 288.84             |
| A_68_P27564839 | chr11:5662438-5662482                             | NM_001077661:-81       | Urgcp         | PROMOTER               | 0.291                                                        | 0.643                          | 1337.79            | 860.34             | 0.187                          | 1214.75            | 227.24             |
| A_68_P26805312 | chr9:106725024-106725068                          | NM_001015507:740       | Vprbp         | INSIDE                 | 0.291                                                        | 0.639                          | 1814.16            | 1159.24            | 0.186                          | 1451.16            | 269.83             |
| A_68_P31149742 | chr17:33766187-33766231                           | NM_026712:172          | Zfp414        | INSIDE                 | 0.291                                                        | 0.445                          | 6747.39            | 3002.33            | 0.129                          | 5296.35            | 685.64             |
| A_68_P26036154 | chr8:90184192-90184236                            | NM_033327:299280       | Zfp423        | DOWNSTREAM             | 0.291                                                        | 0.573                          | 7295.16            | 4182.97            | 0.167                          | 4961.94            | 828.90             |
| A_68_P20936657 | chr1:193006272-193006316                          | NM_007498:918          | Atf3          | INSIDE                 | 0.290                                                        | 0.486                          | 1095.96            | 532.55             | 0.141                          | 829.74             | 116.77             |
| A_68_P24115149 | chr5:135662813-135662862                          | NM_011714:-355         | Baz1b         | PROMOTER               | 0.290                                                        | 0.480                          | 1075.80            | 516.45             | 0.139                          | 874.52             | 121.72             |
| A_68_P24467398 | chr6:55067497-55067541                            | NM_009953:15448        | Crhr2         | INSIDE                 | 0.290                                                        | 0.491                          | 1247.82            | 612.33             | 0.142                          | 865.93             | 123.04             |
| A_68_P26248320 | chr8:127420438-127420486                          | NM_198103:1143         | Exoc8         | INSIDE                 | 0.290                                                        | 1.552                          | 928.99             | 1442.11            | 0.450                          | 780.54             | 351.57             |
| A_68_P25011168 | chr7:26444266-26444310                            | NM_138586:117          | Exose5        | INSIDE                 | 0.290                                                        | 0.569                          | 3894.44            | 2214.29            | 0.165                          | 2797.00            | 460.86             |
| A_68_P30589004 | chr16:20693747-20693792                           | NM_133778:-1360        | Fam131a       | PROMOTER               | 0.290                                                        | 0.623                          | 818.12             | 509.47             | 0.180                          | 636.34             | 114.76             |
| A_68_P30347858 | chr15:76199296-76199340                           | NM_021555:-9           | Fam203a       | PROMOTER               | 0.290                                                        | 0.590                          | 980.36             | 578.65             | 0.171                          | 721.73             | 123.65             |
| A_68_P25035344 | chr7:31935750-31935794                            | NM_027898:297          | Gramd1a       | INSIDE                 | 0.290                                                        | 0.720                          | 2585.09            | 1861.85            | 0.209                          | 1791.82            | 374.37             |
| A_68_P32539365 | chrX:91787127-91787171                            | NM_019791:265          | Maged1        | INSIDE                 | 0.290                                                        | 1.612                          | 4543.27            | 7325.31            | 0.468                          | 1646.10            | 770.57             |
| A_68_P32696393 | chrX:136405600-136405644                          | NM_001193309:571       | Morc4         | INSIDE                 | 0.290                                                        | 1.434                          | 3195.96            | 4582.39            | 0.415                          | 1254.52            | 520.76             |
| A_68_P21138065 | chr2:35991976-35992020                            | NM_026422:81           | Mrrf          | INSIDE                 | 0.290                                                        | 0.380                          | 1379.22            | 524.74             | 0.110                          | 1059.61            | 116.93             |
| A_68_P20258949 | chr1:58502448-58502495                            | NM_027351:-141         | Ppil3         | DIVERGENT_PROMOTER     | 0.290                                                        | 0.508                          | 1199.71            | 609.82             | 0.147                          | 786.45             | 115.84             |
| A_68_P29950631 | chr14:120878349-120878398                         | NM_029519:691          | Rap2a         | INSIDE                 | 0.290                                                        | 0.569                          | 1022.09            | 582.08             | 0.165                          | 727.34             | 120.08             |
| A_68_P28741734 | chr12:112278458-112278502                         | NM_198023:472          | Rcor1         | INSIDE                 | 0.290                                                        | 0.583                          | 1825.48            | 1065.11            | 0.169                          | 1419.55            | 240.15             |
| A_68_P26770648 | chr9:100543417-100543473                          | NM_009282:-597         | Stag1         | PROMOTER               | 0.290                                                        | 0.551                          | 990.61             | 545.74             | 0.160                          | 756.42             | 120.75             |
| A_68_P31104079 | chr17:25611509-25611553                           | NM_027951:2996         | Tekt4         | INSIDE                 | 0.290                                                        | 0.538                          | 2290.27            | 1232.73            | 0.156                          | 1651.83            | 258.06             |
| A_68_P29619287 | chr14:56300293-56300337                           | NM_145705:340          | Timf2         | INSIDE                 | 0.290                                                        | 0.359                          | 1619.23            | 581.11             | 0.104                          | 1191.14            | 123.90             |
| A_68_P24092036 | chr5:130555652-130555696                          | NM_001130476:319       | Tpst1         | INSIDE                 | 0.290                                                        | 0.699                          | 1632.32            | 1140.96            | 0.203                          | 1334.75            | 270.58             |
| A_68_P26228083 | chr8:124177031-124177079                          | NM_080855:-1221        | Zcche14       | PROMOTER               | 0.290                                                        | 0.456                          | 1346.16            | 613.25             | 0.132                          | 940.16             | 124.30             |
| A_68_P21101316 | chr2:29949011-29949055                            | NM_001037762:123       | Zdhhc12       | INSIDE                 | 0.290                                                        | 0.613                          | 1506.51            | 923.59             | 0.178                          | 1068.77            | 190.18             |
| A_68_P31620728 | chr18:36049609-36049656                           |                        | Unknown       |                        | 0.290                                                        | 0.600                          | 983.92             | 590.81             | 0.174                          | 694.27             | 120.75             |
| A_68_P25653637 | chr8:11187883-11187927                            | ENSMUST00000151014:150 |               | INSIDE                 | 0.290                                                        | 0.475                          | 1405.38            | 667.83             | 0.138                          | 1005.54            | 138.45             |
| A_68_P26973142 | chr10:17742734-17742778                           | NM_028440:302          | 3110003A17Rik | INSIDE                 | 0.289                                                        | 0.605                          | 3596.24            | 2174.83            | 0.175                          | 2581.80            | 450.71             |
| A_68_P29005206 | chr13:46060896-46060940                           | NM_009124:-573         | Atxn1         | PROMOTER               | 0.289                                                        | 0.533                          | 1901.12            | 1013.24            | 0.154                          | 1466.43            | 226.22             |
| A_68_P25843138 | chr8:48798881-48798925                            | NM_172407:383          | Cdkn2aip      | INSIDE                 | 0.289                                                        | 0.518                          | 1190.71            | 616.78             | 0.150                          | 980.32             | 146.98             |

| ProbeName       | Target position of probe on CpG island microarray | TargetID           | GeneSymbol    | CpG island Description | Ratio of relative methylation (TiO <sub>2</sub> -NP/Vehicle) | Sham group                     |                    |                    | TiO <sub>2</sub> -H group      |                    |                    |
|-----------------|---------------------------------------------------|--------------------|---------------|------------------------|--------------------------------------------------------------|--------------------------------|--------------------|--------------------|--------------------------------|--------------------|--------------------|
|                 |                                                   |                    |               |                        |                                                              | Relative methylation (Cy5/Cy3) | Cy3 signal (Input) | Cy5 signal (MeDIP) | Relative methylation (Cy5/Cy3) | Cy3 signal (Input) | Cy5 signal (MeDIP) |
| A_68_P27183505  | chr10:61441491-61441535                           | NM_007731:344      | Col13a1       | INSIDE                 | 0.289                                                        | 0.464                          | 1189.96            | 552.60             | 0.134                          | 898.88             | 120.49             |
| A_68_P223361908 | chr4:140616772-140616816                          | NM_001145958:-334  | Crocc         | PROMOTER               | 0.289                                                        | 0.442                          | 4975.18            | 2200.64            | 0.128                          | 3735.03            | 476.92             |
| A_68_P21134666  | chr2:35477528-35477572                            | NM_001114124:50    | Dab2ip        | INSIDE                 | 0.289                                                        | 0.413                          | 1276.03            | 527.55             | 0.119                          | 1055.63            | 126.06             |
| A_68_P21102299  | chr2:30141747-30141791                            | NM_177648:106      | Dolk          | INSIDE                 | 0.289                                                        | 0.581                          | 2654.39            | 1542.59            | 0.168                          | 1932.29            | 324.04             |
| A_68_P32219504  | chr19:59526023-59526072                           | NR_002863:7078     | Emx2os        | INSIDE                 | 0.289                                                        | 0.588                          | 883.92             | 519.35             | 0.170                          | 746.75             | 126.83             |
| A_68_P30364009  | chr15:78873840-78873884                           | NM_015738:1548     | Galr3         | INSIDE                 | 0.289                                                        | 0.709                          | 2482.84            | 1759.91            | 0.205                          | 1813.34            | 372.01             |
| A_68_P31469355  | chr18:5592249-5592293                             | NR_033552:165      | Gm10125       | INSIDE                 | 0.289                                                        | 0.412                          | 1288.43            | 530.38             | 0.119                          | 982.72             | 116.95             |
| A_68_P26546363  | chr9:58049670-58049721                            | NM_001161540:-89   | Islr2         | PROMOTER               | 0.289                                                        | 1.612                          | 3806.23            | 6134.04            | 0.466                          | 2481.86            | 1156.46            |
| A_68_P28997683  | chr13:44829152-44829196                           | NM_001205043:2535  | Jarid2        | INSIDE                 | 0.289                                                        | 0.517                          | 2630.47            | 1360.22            | 0.150                          | 1836.55            | 274.76             |
| A_68_P25349935  | chr7:104480504-104480548                          | NM_001039039:-306  | Kctd21        | DIVERGENT_PROMOTER     | 0.289                                                        | 0.299                          | 1729.33            | 516.53             | 0.086                          | 1377.68            | 118.82             |
| A_68_P21309972  | chr2:69423381-69423427                            | NM_001081088:720   | Lrp2          | INSIDE                 | 0.289                                                        | 0.553                          | 1038.24            | 574.28             | 0.160                          | 761.29             | 121.55             |
| A_68_P23260021  | chr4:122638391-122638435                          | NM_029662:19       | Mfsd2a        | INSIDE                 | 0.289                                                        | 0.622                          | 1411.09            | 877.56             | 0.180                          | 1126.79            | 202.73             |
| A_68_P23349653  | chr4:138648926-138648970                          | NM_008675:-63      | Nbl1          | PROMOTER               | 0.289                                                        | 0.597                          | 1053.71            | 628.70             | 0.173                          | 887.58             | 153.14             |
| A_68_P26075123  | chr8:96560510-96560557                            | NM_026623:406      | Nudt21        | INSIDE                 | 0.289                                                        | 0.604                          | 1360.52            | 822.02             | 0.175                          | 1087.56            | 189.83             |
| A_68_P25957680  | chr8:74116556-74116600                            | NM_025396:496      | Pgls          | INSIDE                 | 0.289                                                        | 0.479                          | 1111.20            | 531.95             | 0.138                          | 852.96             | 118.07             |
| A_68_P21110347  | chr2:31491119-31491163                            | NM_001123362:-4416 | Prdm12        | PROMOTER               | 0.289                                                        | 0.605                          | 2072.75            | 1254.06            | 0.175                          | 1628.91            | 285.24             |
| A_68_P27954278  | chr11:80242652-80242696                           | NM_178616:558      | Psmc11        | INSIDE                 | 0.289                                                        | 0.570                          | 2297.37            | 1309.55            | 0.165                          | 1732.48            | 285.19             |
| A_68_P26463575  | chr9:43553383-43553427                            | NM_021424:746      | Pvrl1         | INSIDE                 | 0.289                                                        | 0.468                          | 1102.54            | 516.48             | 0.136                          | 899.37             | 121.89             |
| A_68_P27896515  | chr11:69495196-69495240                           | NM_030702:254      | Senp3         | INSIDE                 | 0.289                                                        | 0.519                          | 2388.39            | 1238.44            | 0.150                          | 1846.44            | 276.67             |
| A_68_P31351306  | chr17:74795028-74795072                           | NM_144798:79       | Slc30a6       | INSIDE                 | 0.289                                                        | 0.614                          | 1014.56            | 622.62             | 0.177                          | 846.16             | 150.14             |
| A_68_P29341537  | chr13:114407731-114407779                         | NM_130796:1018     | Snx18         | INSIDE                 | 0.289                                                        | 0.539                          | 1023.50            | 551.54             | 0.156                          | 768.99             | 119.62             |
| A_68_P30380073  | chr15:81689400-81689446                           | NM_020507:-666     | Tob2          | PROMOTER               | 0.289                                                        | 0.544                          | 1004.28            | 546.65             | 0.157                          | 757.58             | 119.12             |
| A_68_P22382654  | chr3:102538511-102538562                          | NM_027533:-156     | Tspan2        | PROMOTER               | 0.289                                                        | 0.588                          | 1057.44            | 621.30             | 0.170                          | 758.81             | 128.76             |
| A_68_P23984910  | chr5:111714358-111714402                          | NM_024477:405559   | Tie28         | INSIDE                 | 0.289                                                        | 1.503                          | 3161.06            | 4751.77            | 0.435                          | 2197.69            | 954.94             |
| A_68_P27796900  | chr11:51813767-51813811                           | NM_009458:180      | Ube2b         | INSIDE                 | 0.289                                                        | 0.391                          | 1321.77            | 517.13             | 0.113                          | 1046.13            | 118.28             |
| A_68_P20023918  | chr1:9737605-9737655                              | NM_173443:833      | Vcpip1        | INSIDE                 | 0.289                                                        | 0.585                          | 1069.26            | 625.55             | 0.169                          | 683.09             | 115.38             |
| A_68_P30246279  | chr15:57972958-57973002                           | NM_029734:-10      | Wdyhv1        | DIVERGENT_PROMOTER     | 0.289                                                        | 0.601                          | 950.62             | 571.54             | 0.174                          | 671.27             | 116.80             |
| A_68_P30000714  | chr15:8519221-8519268                             |                    | Unknown       |                        | 0.289                                                        | 0.626                          | 1571.37            | 983.84             | 0.181                          | 1190.85            | 215.58             |
| A_68_P31215882  | chr17:48233958-48234004                           | NM_026625:7399     | 1700067P10Rik | DOWNSTREAM             | 0.288                                                        | 0.584                          | 897.20             | 524.07             | 0.168                          | 720.02             | 121.27             |
| A_68_P24127511  | chr5:138220691-138220735                          | NM_027242:567      | 2010007H12Rik | INSIDE                 | 0.288                                                        | 0.582                          | 1030.64            | 599.67             | 0.168                          | 736.02             | 123.52             |
| A_68_P31609279  | chr18:33954809-33954858                           | NR_038151:288      | 2410004N09Rik | INSIDE                 | 0.288                                                        | 0.536                          | 1097.38            | 588.01             | 0.154                          | 778.08             | 120.08             |
| A_68_P31119198  | chr17:28046785-28046829                           | NM_181413:522      | Anks1         | INSIDE                 | 0.288                                                        | 0.366                          | 1475.23            | 539.44             | 0.105                          | 1139.79            | 119.99             |
| A_68_P26569955  | chr9:62189553-62189597                            | NM_009672:425      | Anp32a        | INSIDE                 | 0.288                                                        | 2.218                          | 7454.98            | 16534.36           | 0.638                          | 4783.60            | 3051.89            |
| A_68_P27970640  | chr11:83116209-83116256                           | NM_001035854:34    | Ap2b1         | INSIDE                 | 0.288                                                        | 0.506                          | 1137.54            | 576.09             | 0.146                          | 795.64             | 115.97             |
| A_68_P21334163  | chr2:73730945-73730989                            | NM_001025093:-281  | Atf2          | PROMOTER               | 0.288                                                        | 0.498                          | 1166.27            | 581.04             | 0.143                          | 875.44             | 125.49             |
| A_68_P26818136  | chr9:108976442-108976486                          | NM_172774:174      | Atrip         | INSIDE                 | 0.288                                                        | 0.607                          | 3567.99            | 2164.71            | 0.175                          | 2549.16            | 444.92             |
| A_68_P24942635  | chr6:148844880-148844924                          | NM_181541:-254     | Caprin2       | PROMOTER               | 0.288                                                        | 0.636                          | 1656.30            | 1053.88            | 0.183                          | 1278.52            | 233.94             |
| A_68_P32130472  | chr19:44181487-44181534                           | NM_001162410:457   | Chuk          | INSIDE                 | 0.288                                                        | 1.567                          | 5209.02            | 8160.95            | 0.451                          | 3712.27            | 1672.88            |
| A_68_P26875482  | chr9:119892235-119892279                          | NM_153287:1520     | Csrmp1        | INSIDE                 | 0.288                                                        | 0.343                          | 3301.34            | 1132.11            | 0.099                          | 2401.95            | 236.83             |
| A_68_P32040826  | chr19:27504142-27504186                           | NM_177474:146      | D19Bwg1357c   | INSIDE                 | 0.288                                                        | 0.614                          | 4153.16            | 2551.77            | 0.177                          | 3232.43            | 572.62             |
| A_68_P20769690  | chr1:162964920-162964964                          | NR_002840:-354     | Gas5          | DIVERGENT_PROMOTER     | 0.288                                                        | 0.565                          | 4380.48            | 2475.69            | 0.163                          | 3082.19            | 500.88             |
| A_68_P32119983  | chr19:42330356-42330400                           | NM_027694:150      | Golga7b       | INSIDE                 | 0.288                                                        | 0.578                          | 1822.77            | 1053.90            | 0.167                          | 1356.45            | 226.09             |
| A_68_P30021004  | chr15:12251953-12252003                           | NM_025673:728      | Golph3        | INSIDE                 | 0.288                                                        | 0.608                          | 1180.07            | 717.61             | 0.175                          | 896.26             | 157.00             |
| A_68_P26023020  | chr8:87509915-87509959                            | NM_001167991:-4557 | Hook2         | DIVERGENT_PROMOTER     | 0.288                                                        | 0.510                          | 1072.57            | 546.88             | 0.147                          | 953.13             | 140.17             |
| A_68_P30966735  | chr16:92059004-92059048                           | NM_080456:446      | Mrps6         | INSIDE                 | 0.288                                                        | 0.491                          | 1978.11            | 971.22             | 0.141                          | 1636.30            | 231.32             |
| A_68_P29689305  | chr14:68743026-68743070                           | NM_008691:13       | Nefm          | INSIDE                 | 0.288                                                        | 0.449                          | 5041.87            | 2261.94            | 0.129                          | 4106.09            | 529.88             |
| A_68_P22872800  | chr4:43644731-43644775                            | NM_173788:-54      | Npr2          | PROMOTER               | 0.288                                                        | 1.511                          | 5436.31            | 8213.47            | 0.435                          | 3337.09            | 1451.11            |
| A_68_P29094165  | chr13:63665588-63665632                           | NM_008957:1218     | Ptch1         | INSIDE                 | 0.288                                                        | 0.668                          | 891.25             | 595.20             | 0.193                          | 622.39             | 119.82             |
| A_68_P27568683  | chr11:6374982-6375033                             | NM_011221:913      | Purb          | INSIDE                 | 0.288                                                        | 0.450                          | 1239.90            | 558.31             | 0.130                          | 910.10             | 117.95             |
| A_68_P23576450  | chr5:31396001-31396045                            | NM_011773:-122     | Slc30a3       | PROMOTER               | 0.288                                                        | 1.336                          | 4328.71            | 5783.69            | 0.384                          | 2888.85            | 1109.73            |
| A_68_P30570744  | chr16:16870950-16870994                           | NM_011624:-11      | Top3b         | DIVERGENT_PROMOTER     | 0.288                                                        | 0.325                          | 1641.88            | 533.84             | 0.094                          | 1394.13            | 130.41             |

| ProbeName      | Target position of probe on CpG island microarray | TargetID               | GeneSymbol    | CpG island Description | Ratio of relative methylation (TiO <sub>2</sub> -NP/Vehicle) | Sham group                     |                    |                    | TiO <sub>2</sub> -H group      |                    |                    |
|----------------|---------------------------------------------------|------------------------|---------------|------------------------|--------------------------------------------------------------|--------------------------------|--------------------|--------------------|--------------------------------|--------------------|--------------------|
|                |                                                   |                        |               |                        |                                                              | Relative methylation (Cy5/Cy3) | Cy3 signal (Input) | Cy5 signal (MeDIP) | Relative methylation (Cy5/Cy3) | Cy3 signal (Input) | Cy5 signal (MeDIP) |
| A_68_P27565815 | chr11:5856146-5856195                             | NM_019661:410          | Ykt6          | INSIDE                 | 0.288                                                        | 0.510                          | 1006.23            | 512.70             | 0.147                          | 829.23             | 121.49             |
| A_68_P27855686 | chr11:62603073-62603117                           | NM_138949:-175         | Zfp286        | PROMOTER               | 0.288                                                        | 0.383                          | 1745.56            | 669.02             | 0.110                          | 1299.64            | 143.42             |
| A_68_P25827306 | chr8:46023782-46023826                            | AK079043:-3291         |               | PROMOTER               | 0.288                                                        | 1.370                          | 3272.86            | 4484.89            | 0.394                          | 2326.64            | 917.67             |
| A_68_P22964961 | chr4:62186403-62186447                            | NM_177607:22           | 4933430117Rik | INSIDE                 | 0.287                                                        | 0.665                          | 1107.30            | 735.94             | 0.191                          | 996.80             | 190.04             |
| A_68_P28191919 | chr11:121534104-121534151                         | NM_178664:338          | B3gnt1        | INSIDE                 | 0.287                                                        | 0.630                          | 876.92             | 552.82             | 0.181                          | 659.65             | 119.51             |
| A_68_P29856057 | chr14:102039624-102039668                         | NM_001033132:42        | Commf6        | INSIDE                 | 0.287                                                        | 0.454                          | 4775.14            | 2167.54            | 0.130                          | 3500.99            | 456.54             |
| A_68_P21320122 | chr2:71382362-71382406                            | NM_010054:2427         | Dlx2          | INSIDE                 | 0.287                                                        | 0.503                          | 1577.81            | 794.03             | 0.145                          | 1323.44            | 191.28             |
| A_68_P28158449 | chr11:116144557-116144601                         | NM_010254:2326         | Galr2         | INSIDE                 | 0.287                                                        | 0.402                          | 1510.04            | 606.34             | 0.115                          | 1072.64            | 123.66             |
| A_68_P23968443 | chr5:108154493-108154537                          | NM_010278:-1151        | Gfi1          | PROMOTER               | 0.287                                                        | 0.572                          | 2172.92            | 1242.44            | 0.164                          | 1848.78            | 303.22             |
| A_68_P30641174 | chr16:30309847-30309891                           | NM_008148:997          | Gp5           | INSIDE                 | 0.287                                                        | 0.678                          | 1551.89            | 1052.21            | 0.194                          | 1119.97            | 217.67             |
| A_68_P30964672 | chr16:91730394-91730438                           | NM_001110276:801       | Itsn1         | INSIDE                 | 0.287                                                        | 0.630                          | 1288.50            | 812.30             | 0.181                          | 1078.75            | 195.21             |
| A_68_P30347741 | chr15:76181792-76181836                           | NM_001164607:91        | Maf1          | INSIDE                 | 0.287                                                        | 1.738                          | 3682.37            | 6398.89            | 0.498                          | 2466.15            | 1228.36            |
| A_68_P21722732 | chr2:147010130-147010174                          | NR_030769:334          | Nkx2-2as      | INSIDE                 | 0.287                                                        | 0.629                          | 1165.97            | 732.92             | 0.181                          | 992.36             | 179.16             |
| A_68_P20797862 | chr1:167933482-167933526                          | NM_011137:-739         | Pou2f1        | PROMOTER               | 0.287                                                        | 0.503                          | 2291.28            | 1152.49            | 0.144                          | 1791.86            | 258.47             |
| A_68_P25574424 | chr7:146038574-146038618                          | NM_026391:528          | Ppp2r2d       | INSIDE                 | 0.287                                                        | 0.623                          | 1761.29            | 1097.13            | 0.179                          | 1484.25            | 265.10             |
| A_68_P2258749  | chr3:136334580-136334624                          | NM_008913:869          | Ppp3ca        | INSIDE                 | 0.287                                                        | 0.530                          | 2584.21            | 1369.02            | 0.152                          | 2083.54            | 316.64             |
| A_68_P24155046 | chr5:143874559-143874603                          | NM_080561:119          | Rnf216        | INSIDE                 | 0.287                                                        | 0.548                          | 1427.99            | 782.23             | 0.157                          | 1146.26            | 180.05             |
| A_68_P28035860 | chr11:94840370-94840414                           | NM_009161:-2751        | Sgca          | PROMOTER               | 0.287                                                        | 0.710                          | 1261.96            | 896.40             | 0.204                          | 952.35             | 194.21             |
| A_68_P27899519 | chr11:70034182-70034226                           | NM_172371:292          | Slc16a13      | INSIDE                 | 0.287                                                        | 0.677                          | 2138.90            | 1448.28            | 0.194                          | 1471.59            | 286.19             |
| A_68_P29664621 | chr14:64562219-64562263                           | NM_011446:-302         | Sox7          | PROMOTER               | 0.287                                                        | 0.675                          | 1774.40            | 1198.17            | 0.194                          | 1488.83            | 288.88             |
| A_68_P25507645 | chr7:134985062-134985106                          | NM_009294:-237         | Stx4a         | PROMOTER               | 0.287                                                        | 0.454                          | 1433.00            | 651.08             | 0.130                          | 1154.76            | 150.48             |
| A_68_P31102174 | chr17:25326044-25326091                           | NM_001197024:723       | Unkl          | INSIDE                 | 0.287                                                        | 2.199                          | 2892.25            | 6361.48            | 0.630                          | 1885.87            | 1188.62            |
| A_68_P26814409 | chr9:108250644-108250688                          | NM_011678:505          | Usp4          | INSIDE                 | 0.287                                                        | 0.698                          | 3306.90            | 2307.48            | 0.200                          | 2490.18            | 499.03             |
| A_68_P26232278 | chr8:124805221-124805265                          | NM_009569:-798         | Zfpm1         | PROMOTER               | 0.287                                                        | 0.706                          | 2890.92            | 2040.33            | 0.203                          | 2183.91            | 442.96             |
| A_68_P29102445 | chr13:65342650-65342694                           |                        |               | Unknown                | 0.287                                                        | 1.640                          | 2950.27            | 4839.63            | 0.471                          | 2013.34            | 948.92             |
| A_68_P30421541 | chr15:88667971-88668015                           | ENSMUST0000083457:2263 |               | DOWNSTREAM             | 0.287                                                        | 0.499                          | 3431.56            | 1713.57            | 0.143                          | 2458.73            | 352.67             |
| A_68_P27633580 | chr11:20731422-20731466                           | NM_173752:-333         | 1110067D22Rik | PROMOTER               | 0.286                                                        | 0.403                          | 2112.75            | 851.46             | 0.115                          | 1634.76            | 188.73             |
| A_68_P24183686 | chr5:149995738-149995782                          | NR_015478:-121         | 5730422E09Rik | DIVERGENT_PROMOTER     | 0.286                                                        | 0.546                          | 995.30             | 543.23             | 0.156                          | 763.11             | 119.15             |
| A_68_P24007906 | chr5:115568969-115569013                          | NM_007383:332          | Acads         | INSIDE                 | 0.286                                                        | 1.430                          | 1816.65            | 2597.95            | 0.409                          | 1297.06            | 531.05             |
| A_68_P32180647 | chr19:53217337-53217384                           | NM_013758:-1126        | Add3          | PROMOTER               | 0.286                                                        | 0.567                          | 1104.47            | 626.67             | 0.162                          | 889.75             | 144.36             |
| A_68_P26199828 | chr8:119467966-119468010                          | NM_177700:696          | Atmin         | INSIDE                 | 0.286                                                        | 0.586                          | 1366.95            | 801.42             | 0.168                          | 1053.01            | 176.42             |
| A_68_P20878149 | chr1:182781262-182781306                          | NM_145943:3            | BC031781      | INSIDE                 | 0.286                                                        | 0.625                          | 917.25             | 573.30             | 0.179                          | 688.08             | 123.08             |
| A_68_P30940063 | chr16:87495606-87495650                           | NM_009840:486          | Cet8          | INSIDE                 | 0.286                                                        | 0.625                          | 3419.51            | 2137.75            | 0.179                          | 2726.76            | 487.36             |
| A_68_P24359958 | chr6:35083871-35083915                            | NM_001164412:-155      | Cnot4         | PROMOTER               | 0.286                                                        | 0.570                          | 1444.44            | 823.65             | 0.163                          | 1111.87            | 181.03             |
| A_68_P28528482 | chr12:72932824-72932868                           | NM_026102:782          | Daam1         | INSIDE                 | 0.286                                                        | 0.443                          | 1250.67            | 554.25             | 0.127                          | 919.50             | 116.72             |
| A_68_P24449227 | chr6:52175677-52175721                            | NM_010456:1671         | Hoxa9         | INSIDE                 | 0.286                                                        | 0.577                          | 1083.34            | 625.13             | 0.165                          | 906.20             | 149.66             |
| A_68_P28553824 | chr12:77505751-77505795                           | NM_008301:416          | Hspa2         | INSIDE                 | 0.286                                                        | 0.465                          | 1427.90            | 663.73             | 0.133                          | 1109.00            | 147.26             |
| A_68_P24759769 | chr6:113432843-113432887                          | NM_134159:11416        | Il17rc        | INSIDE                 | 0.286                                                        | 0.272                          | 2040.65            | 555.79             | 0.078                          | 1604.13            | 124.97             |
| A_68_P21680283 | chr2:139502974-139503018                          | NM_001126490:-917      | Ism1          | PROMOTER               | 0.286                                                        | 0.499                          | 2705.45            | 1349.99            | 0.142                          | 2069.31            | 294.85             |
| A_68_P23120703 | chr4:94717558-94717602                            | NM_010591:1333         | Jun           | INSIDE                 | 0.286                                                        | 0.666                          | 949.37             | 632.09             | 0.191                          | 754.96             | 143.85             |
| A_68_P30478813 | chr15:99054103-99054147                           | NM_010601:-1282        | Kenh3         | PROMOTER               | 0.286                                                        | 0.493                          | 1168.71            | 575.72             | 0.141                          | 913.16             | 128.58             |
| A_68_P31156874 | chr17:35118802-35118846                           | NM_001204273:-250      | Lsm2          | PROMOTER               | 0.286                                                        | 0.428                          | 2081.23            | 890.56             | 0.122                          | 1752.74            | 214.56             |
| A_68_P23588230 | chr5:33678025-33678069                            | NM_021500:-174         | Maca          | PROMOTER               | 0.286                                                        | 0.374                          | 1878.77            | 703.16             | 0.107                          | 1386.19            | 148.30             |
| A_68_P30575358 | chr16:17722742-17722786                           | NM_001040683:259       | Med15         | INSIDE                 | 0.286                                                        | 0.453                          | 1994.93            | 904.08             | 0.130                          | 1685.87            | 218.73             |
| A_68_P28177558 | chr11:119251624-119251668                         | NR_035453:-139         | Mir1932       | PROMOTER               | 0.286                                                        | 0.462                          | 4271.84            | 1973.19            | 0.132                          | 3223.29            | 425.76             |
| A_68_P29701298 | chr14:70843425-70843469                           | NR_029802:130          | Mir320        | DOWNSTREAM             | 0.286                                                        | 0.682                          | 3204.31            | 2185.44            | 0.195                          | 2370.08            | 462.40             |
| A_68_P29689083 | chr14:68703035-68703085                           | NM_010910:1120         | Nefl          | INSIDE                 | 0.286                                                        | 0.585                          | 1767.07            | 1033.39            | 0.167                          | 1351.09            | 226.08             |
| A_68_P29023783 | chr13:49283461-49283505                           | NM_013610:567          | Ninj1         | INSIDE                 | 0.286                                                        | 0.600                          | 926.87             | 555.99             | 0.171                          | 682.64             | 116.94             |
| A_68_P23271479 | chr4:124664198-124664242                          | NM_138683:547          | Rspo1         | INSIDE                 | 0.286                                                        | 1.542                          | 9361.65            | 14434.57           | 0.442                          | 6803.05            | 3005.24            |
| A_68_P28224313 | chr12:8777876-8777920                             | NM_011519:-303         | Sdc1          | PROMOTER               | 0.286                                                        | 0.478                          | 1159.22            | 553.62             | 0.137                          | 887.67             | 121.34             |
| A_68_P23993052 | chr5:113005975-113006019                          | NM_019982:209          | Sez6l         | INSIDE                 | 0.286                                                        | 0.594                          | 2040.56            | 1211.37            | 0.170                          | 1645.50            | 279.06             |

| ProbeName      | Target position of probe on CpG island microarray | TargetID           | GeneSymbol    | CpG island Description | Ratio of relative methylation (TiO <sub>2</sub> -NP/Vehicle) | Sham group                     |                    |                    | TiO <sub>2</sub> -H group      |                    |                    |
|----------------|---------------------------------------------------|--------------------|---------------|------------------------|--------------------------------------------------------------|--------------------------------|--------------------|--------------------|--------------------------------|--------------------|--------------------|
|                |                                                   |                    |               |                        |                                                              | Relative methylation (Cy5/Cy3) | Cy3 signal (Input) | Cy5 signal (MeDIP) | Relative methylation (Cy5/Cy3) | Cy3 signal (Input) | Cy5 signal (MeDIP) |
| A_68_P28534662 | chr12:74040869-74040913                           | NM_011384:-41      | Six6          | PROMOTER               | 0.286                                                        | 0.575                          | 2021.53            | 1162.50            | 0.164                          | 1466.62            | 240.87             |
| A_68_P27779980 | chr11:48613984-48614028                           | NR_028563:-1528    | Snord96a      | PROMOTER               | 0.286                                                        | 0.484                          | 1131.53            | 548.14             | 0.139                          | 850.77             | 118.00             |
| A_68_P32136797 | chr19:45228297-45228341                           | NM_021901:3114     | Tlx1          | INSIDE                 | 0.286                                                        | 0.574                          | 1014.95            | 582.93             | 0.164                          | 765.50             | 125.67             |
| A_68_P27842502 | chr11:60166254-60166298                           | NM_001039092:131   | Tom1l2        | INSIDE                 | 0.286                                                        | 0.524                          | 2049.56            | 1073.20            | 0.150                          | 1540.13            | 230.37             |
| A_68_P21070648 | chr2:25079927-25079971                            | NM_146116:274      | Tubb2c        | INSIDE                 | 0.286                                                        | 0.550                          | 2642.39            | 1453.91            | 0.157                          | 2034.13            | 319.71             |
| A_68_P27992046 | chr11:86806680-86806725                           | NM_001005341:562   | Ypel2         | INSIDE                 | 0.286                                                        | 0.717                          | 2621.91            | 1881.13            | 0.205                          | 2013.03            | 413.64             |
| A_68_P21121777 | chr2:33324228-33324287                            | NM_001025594:-205  | Zbtb43        | PROMOTER               | 0.286                                                        | 0.607                          | 860.01             | 521.62             | 0.174                          | 684.62             | 118.83             |
| A_68_P24114682 | chr5:135565443-135565487                          |                    |               | Unknown                | 0.286                                                        | 0.542                          | 1537.77            | 833.26             | 0.155                          | 1383.43            | 214.26             |
| A_68_P21904833 | chr2:180317770-180317815                          | NM_028479:1784     | 1600027N09Rik | INSIDE                 | 0.285                                                        | 0.714                          | 1518.90            | 1083.89            | 0.203                          | 1141.79            | 231.82             |
| A_68_P30380159 | chr15:81702880-81702926                           | NM_080633:10       | Aco2          | INSIDE                 | 0.285                                                        | 0.550                          | 1078.74            | 593.74             | 0.157                          | 764.99             | 119.88             |
| A_68_P32019520 | chr19:23832652-23832703                           | NM_177034:-688     | Apba1         | PROMOTER               | 0.285                                                        | 0.633                          | 849.54             | 537.40             | 0.180                          | 663.11             | 119.36             |
| A_68_P24798779 | chr6:120442774-120442818                          | NM_033567:1029     | Cecr6         | INSIDE                 | 0.285                                                        | 0.473                          | 2029.78            | 960.77             | 0.135                          | 1580.40            | 213.41             |
| A_68_P23415476 | chr4:151308731-151308775                          | NM_172704:924      | Dnajc11       | INSIDE                 | 0.285                                                        | 0.476                          | 1138.93            | 542.64             | 0.136                          | 972.31             | 132.01             |
| A_68_P23270909 | chr4:124571706-124571750                          | NM_177671:12700    | Epha10        | DOWNSTREAM             | 0.285                                                        | 0.701                          | 1547.42            | 1084.80            | 0.200                          | 1080.50            | 215.98             |
| A_68_P28158782 | chr11:116197021-116197065                         | NM_008240:-374     | Foxj1         | PROMOTER               | 0.285                                                        | 0.470                          | 1201.62            | 564.88             | 0.134                          | 868.88             | 116.34             |
| A_68_P29484665 | chr14:27852520-27852564                           | NM_134437:366      | Il17rd        | INSIDE                 | 0.285                                                        | 0.660                          | 1194.43            | 787.81             | 0.188                          | 981.10             | 184.21             |
| A_68_P28832394 | chr13:12553847-12553891                           | NM_001199043:137   | Lgals8        | INSIDE                 | 0.285                                                        | 0.707                          | 1827.52            | 1291.24            | 0.201                          | 1343.56            | 270.44             |
| A_68_P26465868 | chr9:43938018-43938064                            | NM_023061:-4700    | Meam          | PROMOTER               | 0.285                                                        | 0.654                          | 1067.23            | 697.96             | 0.186                          | 841.86             | 156.71             |
| A_68_P30575357 | chr16:17722612-17722656                           | NM_001040683:389   | Med15         | INSIDE                 | 0.285                                                        | 0.581                          | 1108.52            | 643.61             | 0.165                          | 918.66             | 151.83             |
| A_68_P28010558 | chr11:90110449-90110493                           | NM_026178:-319     | Mmd           | PROMOTER               | 0.285                                                        | 0.653                          | 1230.30            | 802.83             | 0.186                          | 966.13             | 179.74             |
| A_68_P31257925 | chr17:56857454-56857498                           | NM_027244:292      | Ndufa11       | INSIDE                 | 0.285                                                        | 0.710                          | 2636.33            | 1871.06            | 0.202                          | 1931.98            | 390.66             |
| A_68_P26400217 | chr9:31194116-31194160                            | NM_172766:362      | Nfrkb         | INSIDE                 | 0.285                                                        | 0.582                          | 1195.13            | 695.01             | 0.166                          | 970.54             | 160.97             |
| A_68_P21070361 | chr2:25036829-25036873                            | NM_025980:573      | Nrarp         | INSIDE                 | 0.285                                                        | 0.691                          | 2563.98            | 1771.64            | 0.197                          | 1831.98            | 361.15             |
| A_68_P23618580 | chr5:38668967-38669011                            | NM_172709:346      | Otop1         | INSIDE                 | 0.285                                                        | 0.445                          | 2069.17            | 921.27             | 0.127                          | 1547.19            | 196.57             |
| A_68_P20370400 | chr1:78193226-78193270                            | NM_001159520:463   | Pax3          | INSIDE                 | 0.285                                                        | 0.398                          | 2203.97            | 877.86             | 0.114                          | 1787.04            | 203.17             |
| A_68_P23438160 | chr4:154735910-154735954                          | NM_008860:-432     | Prckz         | PROMOTER               | 0.285                                                        | 0.346                          | 1560.54            | 540.03             | 0.099                          | 1188.92            | 117.20             |
| A_68_P32071917 | chr19:32831118-32831162                           | NM_008960:-926     | Pten          | PROMOTER               | 0.285                                                        | 0.460                          | 1600.62            | 735.67             | 0.131                          | 1213.86            | 159.15             |
| A_68_P27541276 | chr10:127848724-127848768                         | NM_001164237:75    | Rnf41         | INSIDE                 | 0.285                                                        | 0.346                          | 1482.41            | 512.45             | 0.098                          | 1202.87            | 118.41             |
| A_68_P21567499 | chr2:118860959-118861006                          | NM_173450:457      | Rpusd2        | INSIDE                 | 0.285                                                        | 0.431                          | 1203.70            | 518.34             | 0.123                          | 946.80             | 116.40             |
| A_68_P28151695 | chr11:115024532-115024576                         | NM_012030:-100     | Sle9a3r1      | PROMOTER               | 0.285                                                        | 0.480                          | 1527.52            | 733.96             | 0.137                          | 1217.10            | 166.40             |
| A_68_P28744656 | chr12:112777247-112777291                         | NR_033168:-1888    | Snora28       | PROMOTER               | 0.285                                                        | 0.489                          | 1390.09            | 679.70             | 0.139                          | 1202.16            | 167.57             |
| A_68_P27569494 | chr11:6526399-6526444                             | NM_001130457:-351  | Tbrg4         | PROMOTER               | 0.285                                                        | 0.562                          | 990.46             | 556.67             | 0.160                          | 735.74             | 117.74             |
| A_68_P22336429 | chr3:93251869-93251913                            | NM_001163098:5639  | Tchh          | INSIDE                 | 0.285                                                        | 0.544                          | 3864.49            | 2102.53            | 0.155                          | 2807.29            | 435.78             |
| A_68_P25042335 | chr7:34917422-34917466                            | NM_207212:843      | Wup           | INSIDE                 | 0.285                                                        | 0.712                          | 3656.96            | 2605.57            | 0.203                          | 2868.96            | 581.90             |
| A_68_P20252951 | chr1:57463816-57463860                            | NM_001037742:-320  | 1110034B05Rik | PROMOTER               | 0.284                                                        | 0.480                          | 1330.48            | 639.27             | 0.137                          | 1073.59            | 146.60             |
| A_68_P30092465 | chr15:27396520-27396564                           | NM_020332:111      | Ank           | INSIDE                 | 0.284                                                        | 1.666                          | 1809.05            | 3014.71            | 0.474                          | 1329.51            | 630.30             |
| A_68_P29047195 | chr13:54150782-54150826                           | NM_010076:223      | Drd1a         | INSIDE                 | 0.284                                                        | 0.507                          | 2712.96            | 1375.12            | 0.144                          | 2034.05            | 293.08             |
| A_68_P29150855 | chr13:75845818-75845862                           | NM_138953:909      | Eil2          | INSIDE                 | 0.284                                                        | 0.551                          | 3812.96            | 2100.90            | 0.157                          | 2775.00            | 434.36             |
| A_68_P26137945 | chr8:108660566-108660610                          | NM_176838:286      | Esrp2         | INSIDE                 | 0.284                                                        | 0.703                          | 2587.98            | 1818.11            | 0.200                          | 1926.67            | 384.79             |
| A_68_P24423931 | chr6:47544220-47544264                            | NM_001146689:787   | Ezh2          | INSIDE                 | 0.284                                                        | 0.462                          | 1665.91            | 770.07             | 0.131                          | 1313.21            | 172.63             |
| A_68_P20352246 | chr1:75139198-75139242                            | NM_170755:-139     | Fam134a       | DIVERGENT_PROMOTER     | 0.284                                                        | 0.487                          | 2793.58            | 1360.33            | 0.138                          | 2206.11            | 305.33             |
| A_68_P29659636 | chr14:63796998-63797042                           | NM_010191:-390     | Fdft1         | PROMOTER               | 0.284                                                        | 0.459                          | 1214.26            | 557.87             | 0.130                          | 912.10             | 118.93             |
| A_68_P31214659 | chr7:48009732-48009776                            | NM_001110824:51827 | Foxp4         | INSIDE                 | 0.284                                                        | 1.607                          | 1108.44            | 1780.99            | 0.456                          | 915.59             | 417.32             |
| A_68_P24519510 | chr6:66987027-66987071                            | NM_007836:353      | Gadd45a       | INSIDE                 | 0.284                                                        | 0.657                          | 4073.48            | 2676.09            | 0.187                          | 3289.26            | 613.92             |
| A_68_P21073093 | chr2:25433409-25433453                            | NM_001005424:2189  | Gm996         | INSIDE                 | 0.284                                                        | 0.705                          | 1422.20            | 1002.37            | 0.201                          | 1083.70            | 217.30             |
| A_68_P29936841 | chr4:118536110-118536156                          | NM_021434:-216     | Gpr180        | DIVERGENT_PROMOTER     | 0.284                                                        | 0.645                          | 846.89             | 546.24             | 0.183                          | 635.90             | 116.38             |
| A_68_P26803573 | chr9:106367885-106367929                          | NM_001159652:365   | Gpr62         | INSIDE                 | 0.284                                                        | 0.609                          | 1636.61            | 996.12             | 0.173                          | 1176.95            | 203.18             |
| A_68_P28056595 | chr11:98319477-98319521                           | NM_010346:11351    | Grb7          | DOWNSTREAM             | 0.284                                                        | 0.545                          | 2796.07            | 1523.32            | 0.155                          | 2077.31            | 321.17             |
| A_68_P31152954 | chr17:34401924-34401968                           | NM_207105:1775     | H2-Ab1        | INSIDE                 | 0.284                                                        | 0.659                          | 7394.39            | 4874.37            | 0.187                          | 5405.93            | 1010.72            |
| A_68_P28153966 | chr11:115375918-115375967                         | NM_008258:-258     | Hn1           | PROMOTER               | 0.284                                                        | 0.639                          | 827.18             | 528.47             | 0.181                          | 663.28             | 120.28             |
| A_68_P31672396 | chr18:45718914-45718958                           | NM_080465:-871     | Ken2          | PROMOTER               | 0.284                                                        | 0.728                          | 2275.19            | 1655.82            | 0.207                          | 1551.17            | 320.94             |

| ProbeName      | Target position of probe on CpG island microarray | TargetID               | GeneSymbol    | CpG island Description | Ratio of relative methylation (TiO <sub>2</sub> -NP/Vehicle) | Sham group                     |                    |                    | TiO <sub>2</sub> -H group      |                    |                    |
|----------------|---------------------------------------------------|------------------------|---------------|------------------------|--------------------------------------------------------------|--------------------------------|--------------------|--------------------|--------------------------------|--------------------|--------------------|
|                |                                                   |                        |               |                        |                                                              | Relative methylation (Cy5/Cy3) | Cy3 signal (Input) | Cy5 signal (MeDIP) | Relative methylation (Cy5/Cy3) | Cy3 signal (Input) | Cy5 signal (MeDIP) |
| A_68_P24932467 | chr6:147040098-147040142                          | NM_001081237:524       | Klhdc5        | INSIDE                 | 0.284                                                        | 0.423                          | 1233.08            | 521.35             | 0.120                          | 989.84             | 118.70             |
| A_68_P31861993 | chr18:80244305-80244349                           | NM_053117:693          | Pard6g        | INSIDE                 | 0.284                                                        | 0.562                          | 1948.38            | 1094.44            | 0.160                          | 1442.57            | 230.37             |
| A_68_P23977768 | chr5:110530421-110530465                          | NR_027665:865          | Plexd1        | INSIDE                 | 0.284                                                        | 0.388                          | 1783.69            | 692.33             | 0.110                          | 1272.40            | 140.06             |
| A_68_P24946434 | chr7:3581622-3581669                              | NM_001159714:59        | Prpf31        | INSIDE                 | 0.284                                                        | 0.510                          | 1092.30            | 557.24             | 0.145                          | 808.75             | 117.27             |
| A_68_P32758876 | chrX:151651017-151651061                          | NM_009121:-86          | Sat1          | PROMOTER               | 0.284                                                        | 1.456                          | 2986.18            | 4346.66            | 0.413                          | 1226.63            | 506.19             |
| A_68_P29034451 | chr13:51888679-51888723                           | NM_013660:313          | Sema4d        | INSIDE                 | 0.284                                                        | 0.409                          | 1636.17            | 668.85             | 0.116                          | 1261.66            | 146.71             |
| A_68_P27632486 | chr11:20531998-20532042                           | NM_001038625:41        | Sertad2       | INSIDE                 | 0.284                                                        | 0.465                          | 1105.30            | 514.01             | 0.132                          | 894.76             | 118.22             |
| A_68_P28137827 | chr11:112643586-112643636                         | NM_011448:87           | Sox9          | INSIDE                 | 0.284                                                        | 0.588                          | 894.94             | 526.10             | 0.167                          | 709.87             | 118.32             |
| A_68_P25507650 | chr7:134985680-134985724                          | NM_009294:381          | Stx4a         | INSIDE                 | 0.284                                                        | 0.495                          | 1378.96            | 682.77             | 0.140                          | 986.11             | 138.42             |
| A_68_P26812057 | chr9:107853467-107853511                          | NM_011634:195          | Traip         | INSIDE                 | 0.284                                                        | 0.576                          | 971.65             | 559.31             | 0.163                          | 761.10             | 124.36             |
| A_68_P23200902 | chr4:109079361-109079406                          | NM_153392:-321         | Ttc39a        | PROMOTER               | 0.284                                                        | 0.620                          | 851.96             | 528.47             | 0.176                          | 666.06             | 117.44             |
| A_68_P28751784 | chr12:113917844-113917888                         | NM_001100460:816       | Zbtb42        | INSIDE                 | 0.284                                                        | 0.714                          | 2093.79            | 1494.32            | 0.202                          | 1495.49            | 302.64             |
| A_68_P24973507 | chr7:13483057-13483103                            | NM_001001447:-83       | Zscan22       | PROMOTER               | 0.284                                                        | 0.539                          | 1225.76            | 660.50             | 0.153                          | 1031.70            | 157.85             |
| A_68_P31494029 | chr18:11239912-11239962                           |                        | Unknown       |                        | 0.284                                                        | 0.583                          | 1388.36            | 809.79             | 0.165                          | 1143.48            | 189.14             |
| A_68_P23074276 | chr4:85160312-85160356                            | ENSMUST00000147066:104 |               | INSIDE                 | 0.284                                                        | 0.554                          | 1526.93            | 845.46             | 0.157                          | 1213.88            | 191.03             |
| A_68_P24329526 | chr6:29935479-29935523                            | ENSMUST00000165864:147 |               | INSIDE                 | 0.284                                                        | 0.737                          | 3587.73            | 2644.21            | 0.210                          | 3018.58            | 632.81             |
| A_68_P30003953 | chr15:9000818-9000866                             | NM_001040395:-166      | 1110020G09Rik | PROMOTER               | 0.283                                                        | 0.592                          | 1047.71            | 620.19             | 0.167                          | 721.25             | 120.70             |
| A_68_P22834880 | chr4:35172594-35172638                            | NM_001081343:513       | 3110043O21Rik | INSIDE                 | 0.283                                                        | 0.592                          | 889.38             | 526.11             | 0.167                          | 743.22             | 124.48             |
| A_68_P31152225 | chr17:34257765-34257809                           | NR_037970:-941         | Brd2          | PROMOTER               | 0.283                                                        | 0.657                          | 5608.29            | 3685.58            | 0.186                          | 3785.75            | 703.50             |
| A_68_P22340676 | chr3:94590702-94590746                            | NM_001037711:-287      | Cgn           | PROMOTER               | 0.283                                                        | 0.421                          | 1390.08            | 584.89             | 0.119                          | 1001.79            | 119.45             |
| A_68_P31937160 | chr19:7062391-7062440                             | NM_020566:4347         | Dnajc4        | INSIDE                 | 0.283                                                        | 0.419                          | 1358.98            | 569.90             | 0.119                          | 987.10             | 117.28             |
| A_68_P26132768 | chr8:107814026-107814070                          | NM_177788:5950         | Exoc3l        | INSIDE                 | 0.283                                                        | 0.585                          | 3362.80            | 1968.90            | 0.166                          | 2244.27            | 371.46             |
| A_68_P30261327 | chr15:60655565-60655617                           | NM_001162926:1045      | Fam84b        | INSIDE                 | 0.283                                                        | 0.608                          | 919.35             | 558.71             | 0.172                          | 699.74             | 120.36             |
| A_68_P20351018 | chr1:74928813-74928857                            | NM_153111:3148         | Fev           | INSIDE                 | 0.283                                                        | 0.642                          | 3070.75            | 1970.84            | 0.181                          | 2408.62            | 436.84             |
| A_68_P29531949 | chr14:35632705-35632749                           | NM_008166:-595         | Grid1         | PROMOTER               | 0.283                                                        | 0.450                          | 1149.77            | 517.11             | 0.127                          | 930.75             | 118.36             |
| A_68_P28152305 | chr11:115111838-115111882                         | NM_010350:16697        | Grin2c        | INSIDE                 | 0.283                                                        | 0.446                          | 2260.91            | 1009.37            | 0.126                          | 1592.06            | 201.15             |
| A_68_P24804130 | chr6:121363049-121363093                          | NM_001033354:60626     | Iqsec3        | INSIDE                 | 0.283                                                        | 0.662                          | 1510.78            | 1000.13            | 0.187                          | 1176.93            | 220.64             |
| A_68_P24816264 | chr6:124612578-124612622                          | NM_145130:-521         | Lpcat3        | PROMOTER               | 0.283                                                        | 0.591                          | 1112.55            | 657.42             | 0.167                          | 968.93             | 162.25             |
| A_68_P23905257 | chr5:96639210-96639261                            | NM_001039084:102       | Mrp1l         | INSIDE                 | 0.283                                                        | 0.603                          | 1236.33            | 745.79             | 0.171                          | 1003.15            | 171.15             |
| A_68_P22339052 | chr3:94247698-94247742                            | NM_030116:463          | Mrp19         | INSIDE                 | 0.283                                                        | 0.443                          | 1707.10            | 755.57             | 0.125                          | 1209.25            | 151.40             |
| A_68_P22509724 | chr3:127336069-127336113                          | NM_009718:28           | Neurog2       | INSIDE                 | 0.283                                                        | 0.382                          | 1512.09            | 576.95             | 0.108                          | 1244.62            | 134.27             |
| A_68_P25171969 | chr7:70590173-70590217                            | NM_130880:537          | Otud7a        | INSIDE                 | 0.283                                                        | 0.433                          | 1666.98            | 721.11             | 0.123                          | 1482.49            | 181.72             |
| A_68_P20506802 | chr1:108068165-108068215                          | NM_133821:-255         | Phlpp1        | PROMOTER               | 0.283                                                        | 0.571                          | 3301.60            | 1885.10            | 0.162                          | 2325.73            | 376.11             |
| A_68_P30520835 | chr16:6349110-6349154                             | NM_021477:464247       | Rbfox1        | INSIDE                 | 0.283                                                        | 0.648                          | 1817.20            | 1176.68            | 0.183                          | 1424.51            | 260.77             |
| A_68_P31560661 | chr18:24687904-24687948                           | NM_144861:779          | Rprd1a        | INSIDE                 | 0.283                                                        | 0.622                          | 1662.70            | 1033.75            | 0.176                          | 1292.73            | 227.47             |
| A_68_P31682227 | chr18:47526193-47526237                           | NM_018744:2308         | Sema6a        | INSIDE                 | 0.283                                                        | 0.385                          | 1381.04            | 532.08             | 0.109                          | 1066.25            | 116.36             |
| A_68_P31834370 | chr18:75160579-75160623                           | NR_028552:-121         | Snord58b      | PROMOTER               | 0.283                                                        | 0.716                          | 2081.82            | 1491.03            | 0.203                          | 1612.49            | 326.96             |
| A_68_P28307239 | chr12:28024428-28024472                           | NM_009234:3133         | Sox11         | INSIDE                 | 0.283                                                        | 0.476                          | 3106.48            | 1479.64            | 0.135                          | 2467.91            | 332.14             |
| A_68_P30377735 | chr15:81230102-81230146                           | NM_133726:0            | St13          | INSIDE                 | 0.283                                                        | 0.741                          | 7066.61            | 5237.90            | 0.210                          | 4964.21            | 1042.96            |
| A_68_P30423272 | chr15:88953588-88953632                           | NM_001163319:-30       | Tubepp6       | PROMOTER               | 0.283                                                        | 1.407                          | 1974.38            | 2777.34            | 0.398                          | 1327.48            | 528.47             |
| A_68_P28567993 | chr12:80273243-80273287                           | NM_016800:181          | Vti1b         | INSIDE                 | 0.283                                                        | 0.629                          | 1090.67            | 686.21             | 0.178                          | 868.86             | 154.77             |
| A_68_P21492627 | chr2:104967572-104967616                          | NM_144783:909          | Wt1           | INSIDE                 | 0.283                                                        | 0.572                          | 1330.60            | 761.18             | 0.162                          | 1090.85            | 176.72             |
| A_68_P27287609 | chr10:80598116-80598160                           | NM_010731:-877         | Zbtb7a        | PROMOTER               | 0.283                                                        | 0.701                          | 1844.23            | 1292.99            | 0.198                          | 1148.37            | 227.51             |
| A_68_P30498878 | chr15:102455997-102456041                         | NM_146065:-166         | Atf7          | PROMOTER               | 0.282                                                        | 0.534                          | 1176.12            | 627.93             | 0.151                          | 1056.04            | 159.25             |
| A_68_P24921625 | chr6:145159463-145159508                          | NM_177222:5            | Casc1         | INSIDE                 | 0.282                                                        | 0.611                          | 1361.87            | 831.85             | 0.172                          | 1001.41            | 172.43             |
| A_68_P25086654 | chr7:51559898-51559942                            | NM_009131:2409         | Clec11a       | INSIDE                 | 0.282                                                        | 0.664                          | 848.05             | 563.18             | 0.187                          | 640.56             | 119.90             |
| A_68_P31126792 | chr17:29375212-29375256                           | NM_153166:-499         | Cpne5         | PROMOTER               | 0.282                                                        | 0.570                          | 3122.91            | 1781.38            | 0.161                          | 2326.13            | 373.64             |
| A_68_P30106579 | chr15:30102117-30102161                           | NM_008729:-209         | Ctnd2         | PROMOTER               | 0.282                                                        | 0.616                          | 1878.08            | 1157.70            | 0.174                          | 1487.11            | 258.73             |
| A_68_P24449834 | chr6:52260814-52260866                            | NM_007966:-2651        | Evx1          | PROMOTER               | 0.282                                                        | 0.540                          | 1031.45            | 557.14             | 0.153                          | 762.12             | 116.28             |
| A_68_P29543502 | chr14:37948492-37948546                           | NM_078478:-10          | Ghitm         | PROMOTER               | 0.282                                                        | 0.619                          | 908.79             | 562.64             | 0.175                          | 668.07             | 116.73             |
| A_68_P21565608 | chr2:118528286-118528330                          | NM_001081971:1391      | Gm1337        | INSIDE                 | 0.282                                                        | 0.716                          | 1588.94            | 1138.16            | 0.202                          | 1307.35            | 264.36             |

| ProbeName      | Target position of probe on CpG island microarray | TargetID           | GeneSymbol    | CpG island Description | Ratio of relative methylation (TiO <sub>2</sub> -NP/Vehicle) | Sham group                     |                    |                    | TiO <sub>2</sub> -H group      |                    |                    |
|----------------|---------------------------------------------------|--------------------|---------------|------------------------|--------------------------------------------------------------|--------------------------------|--------------------|--------------------|--------------------------------|--------------------|--------------------|
|                |                                                   |                    |               |                        |                                                              | Relative methylation (Cy5/Cy3) | Cy3 signal (Input) | Cy5 signal (MeDIP) | Relative methylation (Cy5/Cy3) | Cy3 signal (Input) | Cy5 signal (MeDIP) |
| A_68_P29619000 | chr14:56254517-56254561                           | NM_024267:-23      | Ipo4          | PROMOTER               | 0.282                                                        | 0.292                          | 2453.01            | 716.88             | 0.083                          | 1878.48            | 155.04             |
| A_68_P22843571 | chr4:36897285-36897329                            | NM_001165999:1471  | Lingo2        | INSIDE                 | 0.282                                                        | 0.649                          | 1776.84            | 1152.69            | 0.183                          | 1408.41            | 258.00             |
| A_68_P27533640 | chr10:126478229-126478273                         | NM_001205036:200   | LOC100504608  | INSIDE                 | 0.282                                                        | 0.361                          | 2077.96            | 751.15             | 0.102                          | 1620.47            | 165.27             |
| A_68_P30340467 | chr15:74786292-74786336                           | NM_001164040:779   | Ly6e          | INSIDE                 | 0.282                                                        | 0.517                          | 1075.37            | 555.47             | 0.146                          | 812.49             | 118.44             |
| A_68_P31829416 | chr18:74225103-74225147                           | NM_172632:-521     | Mapk4         | PROMOTER               | 0.282                                                        | 0.460                          | 1360.36            | 626.05             | 0.130                          | 1238.03            | 160.75             |
| A_68_P28461539 | chr12:58331901-58331948                           | NM_001164370:513   | Mipol1        | INSIDE                 | 0.282                                                        | 0.490                          | 1182.98            | 579.77             | 0.138                          | 918.97             | 126.93             |
| A_68_P27903939 | chr11:70833307-70833351                           | NM_025993:216      | Mis12         | INSIDE                 | 0.282                                                        | 0.431                          | 1217.58            | 524.45             | 0.121                          | 981.65             | 119.22             |
| A_68_P22129478 | chr3:51212746-51212790                            | NM_025523:109      | Ndufc1        | INSIDE                 | 0.282                                                        | 0.487                          | 2313.80            | 1126.57            | 0.137                          | 1725.09            | 237.16             |
| A_68_P21070362 | chr2:25036916-25036960                            | NM_025980:661      | Nrarp         | INSIDE                 | 0.282                                                        | 0.637                          | 3173.71            | 2022.47            | 0.180                          | 2317.54            | 416.33             |
| A_68_P30650143 | chr16:31933937-31933981                           | NM_172822:22       | Pigz          | INSIDE                 | 0.282                                                        | 0.517                          | 1181.84            | 610.58             | 0.146                          | 846.76             | 123.55             |
| A_68_P30513992 | chr16:5132390-5132436                             | NM_008909:162      | Ppl           | INSIDE                 | 0.282                                                        | 0.468                          | 1156.38            | 540.83             | 0.132                          | 902.55             | 119.09             |
| A_68_P31928437 | chr19:5388969-5389013                             | NM_016882:-287     | Sart1         | PROMOTER               | 0.282                                                        | 0.529                          | 1120.54            | 592.66             | 0.149                          | 886.23             | 131.98             |
| A_68_P27915807 | chr11:73013310-73013355                           | NM_029031:349      | Shpk          | INSIDE                 | 0.282                                                        | 0.649                          | 903.19             | 586.29             | 0.183                          | 628.50             | 114.93             |
| A_68_P31412155 | chr17:86092046-86092090                           | NM_011380:-4474    | Six2          | PROMOTER               | 0.282                                                        | 0.451                          | 1703.10            | 768.03             | 0.127                          | 1391.83            | 176.85             |
| A_68_P28187724 | chr11:120812178-120812222                         | NM_001038653:1820  | Stc16a3       | INSIDE                 | 0.282                                                        | 0.610                          | 2676.51            | 1632.44            | 0.172                          | 1910.64            | 329.15             |
| A_68_P20788009 | chr1:166179184-166179228                          | NM_054087:21       | Stc19a2       | INSIDE                 | 0.282                                                        | 0.531                          | 3660.11            | 1942.01            | 0.150                          | 2936.10            | 439.37             |
| A_68_P31151612 | chr17:34168426-34168470                           | NM_001077709:187   | Stc39a7       | INSIDE                 | 0.282                                                        | 0.441                          | 1242.25            | 547.48             | 0.124                          | 937.67             | 116.51             |
| A_68_P27162286 | chr10:57514696-57514740                           | NM_020561:369      | Smpd3a        | INSIDE                 | 0.282                                                        | 0.475                          | 1179.15            | 559.67             | 0.134                          | 929.07             | 124.20             |
| A_68_P31123424 | chr17:28758327-28758378                           | NM_016795:1047     | Srp1          | INSIDE                 | 0.282                                                        | 0.529                          | 1613.63            | 853.61             | 0.149                          | 1237.90            | 184.37             |
| A_68_P27941695 | chr11:77979180-77979227                           | NM_009423:-151     | Traf4         | PROMOTER               | 0.282                                                        | 0.538                          | 1100.62            | 591.94             | 0.152                          | 926.94             | 140.73             |
| A_68_P24777346 | chr6:116578724-116578768                          | NM_026057:249      | Zfp422        | INSIDE                 | 0.282                                                        | 0.553                          | 3244.64            | 1793.90            | 0.156                          | 2317.78            | 361.06             |
| A_68_P24605099 | chr6:85401740-85401787                            | NR_028081:201      | 170004003Rik  | INSIDE                 | 0.281                                                        | 0.630                          | 892.75             | 562.20             | 0.177                          | 656.57             | 116.23             |
| A_68_P21864323 | chr2:172265966-172266010                          | NM_025542:-89      | 2410001C21Rik | PROMOTER               | 0.281                                                        | 0.572                          | 1502.08            | 859.66             | 0.161                          | 1181.28            | 190.27             |
| A_68_P30931898 | chr16:85900536-85900586                           | NM_011782:810      | Adams5        | INSIDE                 | 0.281                                                        | 0.421                          | 1248.03            | 525.97             | 0.118                          | 984.46             | 116.54             |
| A_68_P28959953 | chr13:38438458-38438503                           | NM_007556:896      | Bmp6          | INSIDE                 | 0.281                                                        | 0.617                          | 2412.64            | 1488.63            | 0.173                          | 1731.52            | 299.91             |
| A_68_P23296726 | chr4:129139208-129139252                          | NM_133889:308      | Bsdc1         | INSIDE                 | 0.281                                                        | 0.461                          | 1182.13            | 545.33             | 0.130                          | 890.14             | 115.58             |
| A_68_P23818502 | chr5:77286666-77286710                            | NM_001163793:17065 | C530008M17Rik | INSIDE                 | 0.281                                                        | 1.592                          | 1314.50            | 2092.35            | 0.447                          | 973.85             | 434.84             |
| A_68_P30836893 | chr16:67620755-67620799                           | NM_001145977:377   | Cadm2         | INSIDE                 | 0.281                                                        | 0.666                          | 1005.38            | 669.65             | 0.187                          | 645.82             | 120.96             |
| A_68_P23898891 | chr5:93696983-93697027                            | NM_007635:406      | Ceng2         | INSIDE                 | 0.281                                                        | 0.502                          | 1240.12            | 622.20             | 0.141                          | 890.36             | 125.31             |
| A_68_P30431388 | chr15:90510200-90510246                           | NM_025815:-403     | Cpne8         | PROMOTER               | 0.281                                                        | 0.443                          | 1325.88            | 587.98             | 0.124                          | 1014.18            | 126.26             |
| A_68_P28036957 | chr11:95006662-95006706                           | NM_007867:431      | Dlx4          | INSIDE                 | 0.281                                                        | 0.651                          | 2321.49            | 1510.92            | 0.183                          | 1744.75            | 318.99             |
| A_68_P22392957 | chr3:104561384-104561428                          | NM_183224:19059    | Fam19a3       | DOWNSTREAM             | 0.281                                                        | 0.477                          | 1131.90            | 540.11             | 0.134                          | 907.71             | 121.49             |
| A_68_P24084083 | chr5:129107881-129107932                          | NM_175284:926      | Fzd10         | INSIDE                 | 0.281                                                        | 0.500                          | 1019.37            | 509.94             | 0.141                          | 844.22             | 118.86             |
| A_68_P29338085 | chr13:113784265-113784309                         | NM_001037914:211   | Gm6320        | INSIDE                 | 0.281                                                        | 0.575                          | 1191.92            | 685.22             | 0.161                          | 977.43             | 157.79             |
| A_68_P28150124 | chr11:114712661-114712705                         | NM_001110337:-163  | Gpre5c        | PROMOTER               | 0.281                                                        | 0.342                          | 1622.76            | 555.06             | 0.096                          | 1266.11            | 121.86             |
| A_68_P23600193 | chr5:35732106-35732150                            | NM_010445:363      | Hmx1          | INSIDE                 | 0.281                                                        | 0.444                          | 3075.14            | 1366.56            | 0.125                          | 2298.91            | 286.79             |
| A_68_P28153290 | chr11:115265346-115265390                         | NM_026729:289      | Ict1          | INSIDE                 | 0.281                                                        | 0.584                          | 2127.27            | 1242.61            | 0.164                          | 1491.93            | 245.07             |
| A_68_P27353694 | chr10:92916374-92916418                           | NM_008517:256      | Lta4h         | INSIDE                 | 0.281                                                        | 0.461                          | 1176.69            | 542.62             | 0.130                          | 913.09             | 118.37             |
| A_68_P30423406 | chr15:88971030-88971074                           | NM_013871:81       | Mapk12        | INSIDE                 | 0.281                                                        | 0.716                          | 2592.92            | 1857.68            | 0.201                          | 1804.08            | 363.14             |
| A_68_P29613303 | chr14:55236595-55236639                           | NR_030457:-994     | Mir686        | PROMOTER               | 0.281                                                        | 0.556                          | 1034.77            | 575.14             | 0.156                          | 921.06             | 143.94             |
| A_68_P23188355 | chr4:106739488-106739543                          | NM_025500:-44      | Mrp137        | DIVERGENT_PROMOTER     | 0.281                                                        | 0.506                          | 1134.27            | 573.53             | 0.142                          | 858.86             | 121.88             |
| A_68_P30126794 | chr15:34012255-34012299                           | NM_026002:-197     | Mtdh          | PROMOTER               | 0.281                                                        | 0.703                          | 2580.46            | 1815.24            | 0.197                          | 1925.28            | 380.12             |
| A_68_P25115904 | chr7:57230774-57230819                            | NM_001037906:77    | Nell1         | INSIDE                 | 0.281                                                        | 1.345                          | 2100.10            | 2825.20            | 0.378                          | 1473.11            | 556.36             |
| A_68_P21079208 | chr2:26358390-26358438                            | NM_008714:928      | Notch1        | INSIDE                 | 0.281                                                        | 0.633                          | 1567.20            | 991.68             | 0.178                          | 1075.31            | 191.03             |
| A_68_P31626861 | chr18:37249454-37249501                           | NM_001003671:-312  | Pcdhac1       | PROMOTER               | 0.281                                                        | 0.621                          | 990.47             | 615.09             | 0.175                          | 820.09             | 143.12             |
| A_68_P27970618 | chr11:83112471-83112515                           | NM_134025:-13      | Pex12         | DIVERGENT_PROMOTER     | 0.281                                                        | 0.631                          | 2669.29            | 1685.21            | 0.177                          | 1858.05            | 329.27             |
| A_68_P27796196 | chr11:51671860-51671916                           | NM_199299:-905     | Phf15         | PROMOTER               | 0.281                                                        | 0.635                          | 916.81             | 581.81             | 0.179                          | 685.66             | 122.42             |
| A_68_P29480407 | chr14:26722558-26722602                           | NM_207229:-201     | Plac9         | PROMOTER               | 0.281                                                        | 0.690                          | 7465.52            | 5150.73            | 0.194                          | 6608.79            | 1282.54            |
| A_68_P28083254 | chr11:102941888-102941932                         | NM_152813:21062    | Plcd3         | INSIDE                 | 0.281                                                        | 0.719                          | 1777.53            | 1277.53            | 0.202                          | 1219.75            | 246.12             |
| A_68_P22411526 | chr3:108059982-108060035                          | NM_011967:165      | Psmc5         | INSIDE                 | 0.281                                                        | 0.631                          | 1111.74            | 702.05             | 0.177                          | 808.70             | 143.42             |
| A_68_P22399296 | chr3:105603567-105603617                          | NM_145541:662      | Rap1a         | INSIDE                 | 0.281                                                        | 0.550                          | 973.04             | 534.79             | 0.154                          | 755.33             | 116.69             |



| ProbeName      | Target position of probe on CpG island microarray | TargetID                | GeneSymbol    | CpG island Description | Ratio of relative methylation (TiO <sub>2</sub> -NP/Vehicle) | Sham group                     |                    |                    | TiO <sub>2</sub> -H group      |                    |                    |
|----------------|---------------------------------------------------|-------------------------|---------------|------------------------|--------------------------------------------------------------|--------------------------------|--------------------|--------------------|--------------------------------|--------------------|--------------------|
|                |                                                   |                         |               |                        |                                                              | Relative methylation (Cy5/Cy3) | Cy3 signal (Input) | Cy5 signal (MeDIP) | Relative methylation (Cy5/Cy3) | Cy3 signal (Input) | Cy5 signal (MeDIP) |
| A_68_P29578867 | chr14:47501948-47501992                           | NM_001037221:-669       | Samd4         | PROMOTER               | 0.281                                                        | 0.414                          | 1606.07            | 665.62             | 0.117                          | 1240.06            | 144.55             |
| A_68_P28164067 | chr11:117127295-117127344                         | NM_001113487:-240       | Septin9       | PROMOTER               | 0.281                                                        | 0.545                          | 1091.92            | 594.59             | 0.153                          | 785.44             | 120.04             |
| A_68_P28164072 | chr11:117127975-117128019                         | NM_001113487:437        | Septin9       | INSIDE                 | 0.281                                                        | 0.414                          | 1960.82            | 810.94             | 0.116                          | 1462.50            | 170.22             |
| A_68_P32427552 | chrX:61530169-61530213                            | NM_178740:-19           | Slitrk4       | PROMOTER               | 0.281                                                        | 1.914                          | 10588.74           | 20265.47           | 0.537                          | 4113.15            | 2209.98            |
| A_68_P28058193 | chr11:98603344-98603393                           | NM_178060:182           | Thra          | INSIDE                 | 0.281                                                        | 0.339                          | 1682.81            | 571.28             | 0.095                          | 1271.26            | 121.06             |
| A_68_P30478054 | chr15:98904927-98904971                           | NM_001162506:-455       | Troap         | PROMOTER               | 0.281                                                        | 0.675                          | 1353.53            | 913.56             | 0.189                          | 969.68             | 183.59             |
| A_68_P27056226 | chr10:34017317-34017361                           | NM_030203:112           | Tspyl4        | INSIDE                 | 0.281                                                        | 0.464                          | 1299.68            | 602.88             | 0.130                          | 1003.98            | 130.86             |
| A_68_P32975183 | chr9:108393525-108393569                          | NM_027804:540           | Usp19         | INSIDE                 | 0.281                                                        | 0.533                          | 1036.90            | 552.26             | 0.149                          | 786.82             | 117.61             |
| A_68_P31147012 | chr17:32925128-32925172                           | NM_172458:82            | Zfp871        | INSIDE                 | 0.281                                                        | 0.683                          | 1074.16            | 733.40             | 0.192                          | 783.56             | 150.47             |
| A_68_P28680480 | chr12:101425351-101425395                         | ENSMUST00000146364:-805 |               | PROMOTER               | 0.281                                                        | 0.547                          | 1067.99            | 584.66             | 0.154                          | 783.96             | 120.42             |
| A_68_P23349886 | chr4:138686821-138686865                          | NR_033745:110           | 2310028011Rik | INSIDE                 | 0.280                                                        | 0.548                          | 2023.91            | 1109.13            | 0.153                          | 1605.35            | 246.22             |
| A_68_P20347693 | chr1:74331033-74331077                            | NM_001190444:258        | Aamp          | INSIDE                 | 0.280                                                        | 0.431                          | 1648.02            | 710.43             | 0.121                          | 1313.97            | 158.37             |
| A_68_P32143651 | chr19:46469679-46469723                           | NM_016860:525           | Actr1a        | INSIDE                 | 0.280                                                        | 0.608                          | 1106.56            | 672.40             | 0.170                          | 919.00             | 156.10             |
| A_68_P21754296 | chr2:153171121-153171165                          | NM_001039939:-732       | Asx1          | PROMOTER               | 0.280                                                        | 0.543                          | 1780.67            | 966.24             | 0.152                          | 1397.73            | 212.40             |
| A_68_P22803192 | chr4:28742495-28742539                            | NM_001122889:2222       | Epha7         | INSIDE                 | 0.280                                                        | 0.395                          | 2846.75            | 1124.65            | 0.110                          | 2230.06            | 246.37             |
| A_68_P27845566 | chr11:60745169-60745219                           | NR_027800:175           | Gm16516       | INSIDE                 | 0.280                                                        | 0.512                          | 1039.71            | 532.39             | 0.144                          | 807.31             | 115.86             |
| A_68_P24156213 | chr5:144125893-144125937                          | NM_133355:328           | Grid2ip       | INSIDE                 | 0.280                                                        | 0.387                          | 1715.24            | 664.49             | 0.108                          | 1251.75            | 135.75             |
| A_68_P26936713 | chr10:10408926-10408970                           | NM_001114333:393181     | Grm1          | INSIDE                 | 0.280                                                        | 0.386                          | 1984.50            | 765.94             | 0.108                          | 1707.58            | 184.84             |
| A_68_P30547086 | chr16:11254244-11254288                           | NM_001130008:152        | Gspt1         | INSIDE                 | 0.280                                                        | 0.440                          | 2981.65            | 1312.19            | 0.123                          | 2199.17            | 271.37             |
| A_68_P28547080 | chr12:76277679-76277723                           | NM_172805:619           | Kenh5         | INSIDE                 | 0.280                                                        | 0.403                          | 1318.92            | 531.28             | 0.113                          | 1070.99            | 120.62             |
| A_68_P23955794 | chr5:105948943-105948987                          | NM_133897:475           | Lrre8c        | INSIDE                 | 0.280                                                        | 0.579                          | 1273.90            | 737.70             | 0.162                          | 967.85             | 156.87             |
| A_68_P30365874 | chr15:79178468-79178512                           | NM_010755:383           | Maff          | INSIDE                 | 0.280                                                        | 1.627                          | 4199.84            | 6834.63            | 0.455                          | 2838.74            | 1291.98            |
| A_68_P27281289 | chr10:79611936-79611980                           | NM_021565:924           | Midn          | INSIDE                 | 0.280                                                        | 0.643                          | 839.66             | 539.96             | 0.180                          | 664.72             | 119.56             |
| A_68_P29675623 | chr14:66424674-66424718                           | NM_023209:-51           | Pbk           | PROMOTER               | 0.280                                                        | 0.597                          | 1015.90            | 606.75             | 0.167                          | 859.53             | 143.56             |
| A_68_P31252242 | chr17:55851800-55851847                           | NM_028370:103           | Pot1b         | INSIDE                 | 0.280                                                        | 0.616                          | 2320.37            | 1429.39            | 0.173                          | 1799.85            | 310.91             |
| A_68_P28119824 | chr11:109512145-109512189                         | NM_021880:-96           | Prkar1a       | PROMOTER               | 0.280                                                        | 0.460                          | 1170.83            | 538.40             | 0.129                          | 901.30             | 116.04             |
| A_68_P27098034 | chr10:42741868-42741912                           | NM_175407:152446        | Sobp          | INSIDE                 | 0.280                                                        | 0.645                          | 1619.54            | 1043.79            | 0.181                          | 1356.07            | 244.96             |
| A_68_P27255276 | chr10:74674681-74674725                           | NM_153406:-115          | Specc11       | PROMOTER               | 0.280                                                        | 0.566                          | 2185.57            | 1237.33            | 0.158                          | 1688.67            | 267.56             |
| A_68_P23590348 | chr5:34001258-34001302                            | NM_001040435:485        | Tacc3         | INSIDE                 | 0.280                                                        | 0.502                          | 1566.40            | 786.82             | 0.141                          | 1212.27            | 170.46             |
| A_68_P24946431 | chr7:3581260-3581308                              | NM_023524:202           | Tfpt          | INSIDE                 | 0.280                                                        | 0.468                          | 1175.23            | 549.55             | 0.131                          | 910.45             | 119.17             |
| A_68_P30653345 | chr16:32608966-32609010                           | NM_011638:7             | Tfrc          | INSIDE                 | 0.280                                                        | 0.544                          | 1547.28            | 841.30             | 0.152                          | 1262.45            | 192.09             |
| A_68_P28975560 | chr13:41111770-41111814                           | NM_025387:174           | Tmem14c       | INSIDE                 | 0.280                                                        | 0.644                          | 1020.72            | 657.77             | 0.181                          | 830.66             | 150.02             |
| A_68_P23621601 | chr5:38952237-38952281                            | NM_011715:576           | Wdr1          | INSIDE                 | 0.280                                                        | 0.536                          | 1344.69            | 721.07             | 0.150                          | 1059.34            | 159.06             |
| A_68_P31925602 | chr19:4878554-4878607                             | NM_001168516:-87        | Zdhhc24       | DIVERGENT_PROMOTER     | 0.280                                                        | 0.366                          | 1495.19            | 546.60             | 0.102                          | 1195.49            | 122.29             |
| A_68_P31002111 | chr16:98183558-98183609                           | NM_001081684:203        | Zfp295        | INSIDE                 | 0.280                                                        | 0.548                          | 1006.51            | 551.09             | 0.153                          | 810.57             | 124.40             |
| A_68_P25063531 | chr7:38558593-38558648                            | NM_172385:-3849         | Zfp536        | PROMOTER               | 0.280                                                        | 0.398                          | 1341.66            | 534.25             | 0.111                          | 1078.38            | 120.20             |
| A_68_P23678471 | chr5:49915727-49915771                            | ENSMUST00000087395:192  |               | INSIDE                 | 0.280                                                        | 0.548                          | 3283.95            | 1800.50            | 0.154                          | 2382.03            | 365.68             |
| A_68_P32698229 | chrX:136813030-136813074                          | ENSMUST00000130153:-651 |               | PROMOTER               | 0.280                                                        | 1.345                          | 3925.47            | 5279.46            | 0.376                          | 1412.68            | 531.64             |
| A_68_P23195467 | chr4:108000626-108000670                          | NM_027250:-108          | 2010305A19Rik | PROMOTER               | 0.279                                                        | 0.516                          | 1602.85            | 827.23             | 0.144                          | 1309.24            | 188.61             |
| A_68_P26242184 | chr8:126416045-126416089                          | NM_009606:2570          | Acta1         | INSIDE                 | 0.279                                                        | 0.610                          | 4222.33            | 2574.56            | 0.170                          | 3074.41            | 523.07             |
| A_68_P31744347 | chr18:58995833-58995877                           | NM_175506:-563          | Adams19       | PROMOTER               | 0.279                                                        | 0.496                          | 1144.12            | 567.40             | 0.138                          | 863.25             | 119.34             |
| A_68_P21754298 | chr2:153171422-153171466                          | NM_001039939:-430       | Asx1          | PROMOTER               | 0.279                                                        | 0.595                          | 1114.15            | 663.06             | 0.166                          | 835.84             | 138.76             |
| A_68_P24056051 | chr5:123959009-123959060                          | NM_198611:-1434         | B3gnt4        | PROMOTER               | 0.279                                                        | 0.596                          | 1020.64            | 608.48             | 0.166                          | 712.01             | 118.30             |
| A_68_P26132516 | chr8:107778018-107778071                          | NM_178879:1007          | B3gnt9-ps     | INSIDE                 | 0.279                                                        | 0.618                          | 863.99             | 533.71             | 0.172                          | 713.52             | 122.82             |
| A_68_P25503359 | chr7:134120190-134120234                          | NM_138754:311           | Cdipt         | INSIDE                 | 0.279                                                        | 0.616                          | 881.62             | 542.65             | 0.172                          | 694.98             | 119.22             |
| A_68_P25045781 | chr7:35597428-35597472                            | NM_175140:280           | Chst8         | INSIDE                 | 0.279                                                        | 0.726                          | 2068.81            | 1501.84            | 0.203                          | 1430.67            | 290.07             |
| A_68_P26016158 | chr8:86239347-86239391                            | NM_197982:293           | Ddx39         | INSIDE                 | 0.279                                                        | 0.607                          | 4677.60            | 2837.73            | 0.169                          | 3307.24            | 559.31             |
| A_68_P29011725 | chr13:47201899-47201943                           | NM_025900:-331          | Dek           | PROMOTER               | 0.279                                                        | 0.384                          | 1550.14            | 595.33             | 0.107                          | 1081.93            | 115.95             |
| A_68_P23226799 | chr4:115611753-115611802                          | NM_001025567:754        | Dmbx1         | INSIDE                 | 0.279                                                        | 0.640                          | 982.15             | 628.68             | 0.179                          | 665.18             | 118.81             |
| A_68_P27849840 | chr11:61498639-61498683                           | NM_178618:749           | Fam83g        | INSIDE                 | 0.279                                                        | 1.794                          | 902.48             | 1619.19            | 0.500                          | 636.82             | 318.52             |
| A_68_P28463161 | chr12:58640100-58640144                           | NM_008259:6986          | Foxa1         | DOWNSTREAM             | 0.279                                                        | 0.579                          | 959.17             | 555.42             | 0.162                          | 804.71             | 130.17             |

| ProbeName      | Target position of probe on CpG island microarray | TargetID                 | GeneSymbol    | CpG island Description | Ratio of relative methylation (TiO <sub>2</sub> -NP/Vehicle) | Sham group                     |                    |                    | TiO <sub>2</sub> -H group      |                    |                    |
|----------------|---------------------------------------------------|--------------------------|---------------|------------------------|--------------------------------------------------------------|--------------------------------|--------------------|--------------------|--------------------------------|--------------------|--------------------|
|                |                                                   |                          |               |                        |                                                              | Relative methylation (Cy5/Cy3) | Cy3 signal (Input) | Cy5 signal (MeDIP) | Relative methylation (Cy5/Cy3) | Cy3 signal (Input) | Cy5 signal (MeDIP) |
| A_68_P22872581 | chr4:43591992-43592036                            | NM_172692:-278           | Gba2          | PROMOTER               | 0.279                                                        | 0.667                          | 1750.32            | 1166.84            | 0.186                          | 1386.88            | 258.22             |
| A_68_P25362932 | chr7:106774074-106774118                          | NM_001195529:1517        | Gm4980        | INSIDE                 | 0.279                                                        | 0.534                          | 2137.54            | 1141.77            | 0.149                          | 1580.08            | 235.53             |
| A_68_P32401469 | chrX:54756662-54756706                            | NM_001033360:250         | Gpr101        | INSIDE                 | 0.279                                                        | 1.503                          | 1133.46            | 1703.26            | 0.419                          | 530.24             | 222.05             |
| A_68_P24979758 | chr7:16705347-16705391                            | NM_133727:144            | Kpnt          | INSIDE                 | 0.279                                                        | 0.601                          | 1547.69            | 929.93             | 0.168                          | 1213.70            | 203.83             |
| A_68_P26192671 | chr8:118229614-118229663                          | NM_001025577:1156        | Maf           | INSIDE                 | 0.279                                                        | 0.518                          | 2078.13            | 1076.01            | 0.144                          | 1552.88            | 224.28             |
| A_68_P27787816 | chr11:50105944-50105992                           | NM_175334:-130           | Maml1         | PROMOTER               | 0.279                                                        | 0.611                          | 864.37             | 528.36             | 0.171                          | 704.18             | 120.09             |
| A_68_P20826868 | chr1:173177287-173177331                          | NM_153064:-65            | Ndufs2        | DIVERGENT_PROMOTER     | 0.279                                                        | 0.570                          | 910.55             | 519.24             | 0.159                          | 736.87             | 117.21             |
| A_68_P23720373 | chr5:58111459-58111503                            | NM_018764:2221           | Pcdh7         | INSIDE                 | 0.279                                                        | 0.417                          | 1401.92            | 583.99             | 0.116                          | 1053.95            | 122.50             |
| A_68_P29057257 | chr13:55927883-55927927                           | NM_011097:4882           | Pitx1         | INSIDE                 | 0.279                                                        | 0.664                          | 1735.85            | 1151.83            | 0.185                          | 1409.77            | 261.10             |
| A_68_P25017512 | chr7:28271931-28271975                            | NM_018820:-19            | Sertad1       | PROMOTER               | 0.279                                                        | 0.622                          | 2163.16            | 1344.97            | 0.173                          | 1769.61            | 306.95             |
| A_68_P21986757 | chr3:21974664-21974711                            | NM_030732:-886           | Tbl1xr1       | PROMOTER               | 0.279                                                        | 0.374                          | 1515.46            | 566.59             | 0.104                          | 1158.01            | 120.71             |
| A_68_P26706479 | chr9:87634192-87634246                            | NM_023814:-8123          | Tbx18         | PROMOTER               | 0.279                                                        | 0.466                          | 1263.18            | 588.70             | 0.130                          | 937.83             | 121.87             |
| A_68_P23440601 | chr4:155158362-155158406                          | NM_001033394:1599        | Tmem88b       | INSIDE                 | 0.279                                                        | 0.443                          | 1265.33            | 560.57             | 0.124                          | 941.84             | 116.58             |
| A_68_P31259987 | chr17:57226887-57226931                           | NM_009451:297            | Tubb4         | INSIDE                 | 0.279                                                        | 0.424                          | 2760.55            | 1170.13            | 0.118                          | 2071.49            | 245.36             |
| A_68_P26470628 | chr9:44773616-44773660                            | NM_145400:45             | Ube4a         | INSIDE                 | 0.279                                                        | 0.615                          | 1197.04            | 736.45             | 0.172                          | 834.72             | 143.46             |
| A_68_P28072950 | chr11:101126785-101126842                         | NM_175638:4933           | Wnk4          | INSIDE                 | 0.279                                                        | 0.449                          | 1167.52            | 524.22             | 0.125                          | 943.22             | 118.08             |
| A_68_P27291280 | chr10:81233564-81233608                           | NM_199062:301            | Zfp781        | INSIDE                 | 0.279                                                        | 0.672                          | 3324.63            | 2233.59            | 0.187                          | 2733.51            | 511.68             |
| A_68_P23692830 | chr5:52506763-52506822                            | AK076709:-1759           |               | PROMOTER               | 0.279                                                        | 0.501                          | 1666.20            | 835.06             | 0.140                          | 1348.90            | 188.51             |
| A_68_P28181190 | chr11:119803788-119803832                         | NM_001037754:-595        | Baiap2        | PROMOTER               | 0.278                                                        | 0.531                          | 3460.85            | 1837.20            | 0.148                          | 2541.24            | 374.90             |
| A_68_P31351851 | chr17:74927352-74927396                           | NM_007566:-260           | Birc6         | PROMOTER               | 0.278                                                        | 0.526                          | 2662.66            | 1400.83            | 0.146                          | 2001.97            | 292.52             |
| A_68_P24114165 | chr5:135462201-135462245                          | NM_009902:139            | Cldn3         | INSIDE                 | 0.278                                                        | 0.363                          | 1646.86            | 597.77             | 0.101                          | 1284.66            | 129.85             |
| A_68_P26085422 | chr8:98331940-98331984                            | NM_001205226:-600        | Cnot1         | PROMOTER               | 0.278                                                        | 0.722                          | 1947.02            | 1405.60            | 0.201                          | 1396.11            | 280.41             |
| A_68_P26016154 | chr8:86238907-86238952                            | NM_197982:-146           | Ddx39         | PROMOTER               | 0.278                                                        | 0.612                          | 887.31             | 543.43             | 0.171                          | 680.21             | 115.98             |
| A_68_P25565217 | chr7:144507254-144507298                          | NM_001113414:-1148       | Ebf3          | PROMOTER               | 0.278                                                        | 0.689                          | 1139.32            | 785.53             | 0.192                          | 912.45             | 174.99             |
| A_68_P26693192 | chr9:85220596-85220642                            | NM_001160378:113         | Fam46a        | INSIDE                 | 0.278                                                        | 0.560                          | 1460.86            | 818.73             | 0.156                          | 1225.83            | 191.20             |
| A_68_P28493836 | chr12:66176491-66176538                           | NM_178912:-78            | Fancm         | DIVERGENT_PROMOTER     | 0.278                                                        | 0.443                          | 1198.26            | 530.99             | 0.123                          | 978.67             | 120.62             |
| A_68_P31093570 | chr17:23908581-23908625                           | NM_153791:-44            | Flywch1       | PROMOTER               | 0.278                                                        | 0.546                          | 1754.60            | 957.21             | 0.152                          | 1401.58            | 212.82             |
| A_68_P22010769 | chr3:27271192-27271236                            | NM_177330:942            | Ghsr          | INSIDE                 | 0.278                                                        | 0.629                          | 1416.27            | 890.73             | 0.175                          | 1126.14            | 197.20             |
| A_68_P21099809 | chr2:29701916-29701960                            | NR_029838:-691           | Mir219-2      | PROMOTER               | 0.278                                                        | 0.609                          | 2809.15            | 1711.19            | 0.169                          | 1983.89            | 336.01             |
| A_68_P30344754 | chr15:75724482-75724526                           | NM_172607:407            | Naprt1        | INSIDE                 | 0.278                                                        | 0.655                          | 1813.88            | 1187.79            | 0.182                          | 1479.30            | 269.17             |
| A_68_P23354482 | chr4:139387475-139387522                          | NM_011039:1385           | Pax7          | INSIDE                 | 0.278                                                        | 0.520                          | 1020.59            | 530.29             | 0.145                          | 863.91             | 124.90             |
| A_68_P29057249 | chr13:55926961-55927005                           | NM_011097:5804           | Pitx1         | INSIDE                 | 0.278                                                        | 0.626                          | 2167.75            | 1356.45            | 0.174                          | 1561.70            | 271.78             |
| A_68_P28614436 | chr12:88488867-88488911                           | NM_153415:-36            | Pomt2         | PROMOTER               | 0.278                                                        | 0.508                          | 1893.67            | 961.70             | 0.141                          | 1559.62            | 220.35             |
| A_68_P28768145 | chr12:117724630-117724674                         | NM_011215:460            | Ptpn2         | INSIDE                 | 0.278                                                        | 0.424                          | 1564.92            | 664.12             | 0.118                          | 1091.87            | 129.03             |
| A_68_P25048761 | chr7:36119403-36119447                            | NM_027897:169            | Rhpn2         | INSIDE                 | 0.278                                                        | 0.678                          | 1219.41            | 826.55             | 0.188                          | 828.80             | 156.00             |
| A_68_P32075617 | chr19:33466407-33466451                           | NM_001146342:357         | Rnls          | INSIDE                 | 0.278                                                        | 0.605                          | 1223.58            | 740.14             | 0.168                          | 977.74             | 164.39             |
| A_68_P31138742 | chr17:31413976-31414020                           | NM_025290:303            | Rsph1         | INSIDE                 | 0.278                                                        | 0.483                          | 1230.30            | 594.82             | 0.135                          | 968.81             | 130.39             |
| A_68_P23312649 | chr4:132066191-132066235                          | NM_144907:159            | Sesn2         | INSIDE                 | 0.278                                                        | 0.617                          | 870.56             | 537.41             | 0.171                          | 695.75             | 119.24             |
| A_68_P21000515 | chr2:10296432-10296476                            | NM_001198809:2392        | Sfmbt2        | INSIDE                 | 0.278                                                        | 0.559                          | 1165.84            | 652.28             | 0.156                          | 966.25             | 150.45             |
| A_68_P31606709 | chr18:33373631-33373675                           | NM_133774:-182           | Stard4        | PROMOTER               | 0.278                                                        | 0.506                          | 1136.21            | 575.08             | 0.141                          | 878.34             | 123.59             |
| A_68_P30652355 | chr16:32420130-32420180                           | NM_025329:367            | Tctex1d2      | INSIDE                 | 0.278                                                        | 0.415                          | 1761.15            | 730.98             | 0.115                          | 1293.59            | 149.40             |
| A_68_P31101668 | chr17:25252658-25252702                           | NM_027880:170            | Telo2         | INSIDE                 | 0.278                                                        | 0.569                          | 902.12             | 513.41             | 0.158                          | 731.53             | 115.79             |
| A_68_P31204667 | chr17:46168826-46168870                           | NM_001110266:-6736       | Vegfa         | PROMOTER               | 0.278                                                        | 0.407                          | 1714.38            | 697.41             | 0.113                          | 1245.65            | 140.94             |
| A_68_P28573854 | chr12:81216498-81216557                           | NM_007564:-2527          | Zfp361l       | PROMOTER               | 0.278                                                        | 0.613                          | 903.02             | 553.40             | 0.171                          | 697.81             | 119.01             |
| A_68_P21124749 | chr2:33822268-33822320                            |                          |               | Unknown                | 0.278                                                        | 0.485                          | 1074.16            | 521.07             | 0.135                          | 895.76             | 120.87             |
| A_68_P21440136 | chr2:94114022-94114066                            | ENSMUST00000167726:-9129 |               | PROMOTER               | 0.278                                                        | 0.476                          | 4746.82            | 2259.25            | 0.132                          | 3260.74            | 431.05             |
| A_68_P24091117 | chr5:130371504-130371553                          | NM_183088:-64            | 2410018M08Rik | DIVERGENT_PROMOTER     | 0.277                                                        | 0.508                          | 1104.46            | 561.61             | 0.141                          | 859.59             | 121.15             |
| A_68_P31149283 | chr17:33661330-33661374                           | NM_172619:212            | Adams10       | INSIDE                 | 0.277                                                        | 1.632                          | 922.24             | 1505.21            | 0.452                          | 739.29             | 334.16             |
| A_68_P26888672 | chr9:122203588-122203632                          | NM_133979:-118           | Ano10         | PROMOTER               | 0.277                                                        | 0.602                          | 3002.32            | 1807.81            | 0.167                          | 2427.02            | 404.99             |
| A_68_P30388929 | chr15:83357855-83357899                           | NM_007546:585            | Bik           | INSIDE                 | 0.277                                                        | 0.586                          | 880.06             | 515.70             | 0.163                          | 715.98             | 116.36             |
| A_68_P26467527 | chr9:44226161-44226205                            | NM_201372:-92            | Ccdc84        | PROMOTER               | 0.277                                                        | 0.654                          | 1166.34            | 762.83             | 0.181                          | 1031.60            | 186.87             |

| ProbeName      | Target position of probe on CpG island microarray | TargetID                  | GeneSymbol    | CpG island Description | Ratio of relative methylation (TiO <sub>2</sub> -NP/Vehicle) | Sham group                     |                    |                    | TiO <sub>2</sub> -H group      |                    |                    |
|----------------|---------------------------------------------------|---------------------------|---------------|------------------------|--------------------------------------------------------------|--------------------------------|--------------------|--------------------|--------------------------------|--------------------|--------------------|
|                |                                                   |                           |               |                        |                                                              | Relative methylation (Cy5/Cy3) | Cy3 signal (Input) | Cy5 signal (MeDIP) | Relative methylation (Cy5/Cy3) | Cy3 signal (Input) | Cy5 signal (MeDIP) |
| A_68_P30532562 | chr16:8424938-8424982                             | NM_029070:269             | Cldn26        | INSIDE                 | 0.277                                                        | 0.705                          | 2714.55            | 1914.14            | 0.196                          | 2026.78            | 396.46             |
| A_68_P21428538 | chr2:92274073-92274117                            | NM_009963:132             | Cry2          | INSIDE                 | 0.277                                                        | 0.458                          | 1293.82            | 591.94             | 0.127                          | 926.38             | 117.21             |
| A_68_P28396962 | chr12:45311155-45311199                           | NM_013760:-121            | Dnajb9        | PROMOTER               | 0.277                                                        | 0.394                          | 1422.76            | 560.34             | 0.109                          | 1067.66            | 116.53             |
| A_68_P25095384 | chr7:53087940-53087984                            | NM_008172:34089           | Grin2d        | INSIDE                 | 0.277                                                        | 0.679                          | 1134.09            | 769.55             | 0.188                          | 911.54             | 171.57             |
| A_68_P31159075 | chr17:35516634-35516678                           | NM_001143689:95           | H2-Gs10       | INSIDE                 | 0.277                                                        | 0.546                          | 1820.45            | 993.97             | 0.151                          | 1377.83            | 208.43             |
| A_68_P23334048 | chr4:136018725-136018769                          | NM_024452:-6929           | Luzp1         | PROMOTER               | 0.277                                                        | 0.553                          | 1038.17            | 573.81             | 0.153                          | 789.09             | 120.97             |
| A_68_P24302044 | chr6:24477440-24477484                            | NM_026614:225             | Ndufa5        | INSIDE                 | 0.277                                                        | 0.567                          | 3081.87            | 1747.08            | 0.157                          | 2370.37            | 372.60             |
| A_68_P25427824 | chr7:120098233-120098277                          | NM_175279:779             | Rassf10       | INSIDE                 | 0.277                                                        | 0.501                          | 2614.57            | 1308.78            | 0.139                          | 2103.27            | 292.12             |
| A_68_P28991172 | chr13:43711132-43711176                           | NM_183204:-11             | Rnf182        | PROMOTER               | 0.277                                                        | 0.583                          | 891.90             | 519.95             | 0.161                          | 742.80             | 119.85             |
| A_68_P26948617 | chr10:12728567-12728611                           | NM_175102:333             | Sf3b5         | INSIDE                 | 0.277                                                        | 0.474                          | 1273.32            | 603.31             | 0.131                          | 1126.82            | 147.89             |
| A_68_P20353690 | chr1:75385333-75385377                            | NM_001085370:3170         | Speg          | INSIDE                 | 0.277                                                        | 0.669                          | 2015.09            | 1348.33            | 0.185                          | 1596.50            | 296.11             |
| A_68_P26426682 | chr9:36575102-36575146                            | NM_008408:39              | Str3a         | INSIDE                 | 0.277                                                        | 0.596                          | 1931.40            | 1150.44            | 0.165                          | 1437.89            | 237.04             |
| A_68_P21875215 | chr2:174241468-174241512                          | NM_020580:186             | Th11          | INSIDE                 | 0.277                                                        | 0.694                          | 1417.70            | 983.20             | 0.192                          | 1072.06            | 206.01             |
| A_68_P21070655 | chr2:25080672-25080722                            | NM_146116:-474            | Tubb2c        | PROMOTER               | 0.277                                                        | 0.375                          | 1654.74            | 620.62             | 0.104                          | 1188.67            | 123.65             |
| A_68_P29240034 | chr13:96094965-96095009                           | NM_028106:-205            | Zbed3         | PROMOTER               | 0.277                                                        | 0.450                          | 1360.48            | 611.58             | 0.124                          | 1094.16            | 136.16             |
| A_68_P25618386 | chr8:4677981-4678025                              | ENSMUST00000058918:363    |               | INSIDE                 | 0.277                                                        | 0.618                          | 928.00             | 573.50             | 0.171                          | 687.25             | 117.81             |
| A_68_P25614137 | chr8:3476402-3476449                              | NM_029598:5564            | 1700019B03Rik | INSIDE                 | 0.276                                                        | 2.077                          | 1712.91            | 3558.55            | 0.574                          | 1103.08            | 633.60             |
| A_68_P22141947 | chr3:53267624-53267668                            | NM_173382:-92             | 2810046L04Rik | DIVERGENT_PROMOTER     | 0.276                                                        | 0.374                          | 1367.28            | 511.93             | 0.103                          | 1194.18            | 123.56             |
| A_68_P25010199 | chr7:26180658-26180710                            | NR_015569:252             | 4732471J01Rik | INSIDE                 | 0.276                                                        | 0.586                          | 917.67             | 537.74             | 0.162                          | 731.17             | 118.37             |
| A_68_P25032018 | chr7:31320141-31320185                            | NM_178252:-134            | Arhgap33      | PROMOTER               | 0.276                                                        | 0.419                          | 1337.10            | 559.89             | 0.116                          | 1014.16            | 117.21             |
| A_68_P24093836 | chr5:130925066-130925110                          | NM_021371:427             | Caln1         | INSIDE                 | 0.276                                                        | 0.422                          | 1512.80            | 638.21             | 0.117                          | 1137.34            | 132.63             |
| A_68_P20501014 | chr1:106890387-106890439                          | NM_011800:225017          | Cdh20         | INSIDE                 | 0.276                                                        | 1.800                          | 766.92             | 1380.67            | 0.497                          | 673.52             | 334.64             |
| A_68_P25272111 | chr7:88599609-88599653                            | NM_007755:-68             | Cpeb1         | PROMOTER               | 0.276                                                        | 0.444                          | 2878.93            | 1277.00            | 0.123                          | 2154.34            | 264.05             |
| A_68_P22943680 | chr4:57155729-57155773                            | NM_019427:278             | Epb4.114b     | INSIDE                 | 0.276                                                        | 0.484                          | 1090.05            | 528.11             | 0.134                          | 905.94             | 121.35             |
| A_68_P23222368 | chr4:114598578-114598622                          | NM_015758:18              | Foxe3         | INSIDE                 | 0.276                                                        | 0.630                          | 2720.76            | 1714.30            | 0.174                          | 2103.50            | 366.27             |
| A_68_P29072412 | chr13:58376159-58376204                           | NM_019832:-632            | Gkap1         | PROMOTER               | 0.276                                                        | 1.706                          | 2038.90            | 3477.83            | 0.471                          | 1472.02            | 693.44             |
| A_68_P27779978 | chr11:48613766-48613813                           | NM_008143:-72             | Gnb2l1        | PROMOTER               | 0.276                                                        | 0.433                          | 1548.56            | 670.53             | 0.120                          | 1016.21            | 121.67             |
| A_68_P23978152 | chr5:110605959-110606003                          | NM_008146:261             | Golga3        | PROMOTER               | 0.276                                                        | 0.742                          | 3679.06            | 2728.70            | 0.205                          | 2822.51            | 577.60             |
| A_68_P21331226 | chr2:73224914-73224958                            | NM_001190297:-481         | Gpr155        | PROMOTER               | 0.276                                                        | 0.517                          | 1051.40            | 543.58             | 0.143                          | 819.19             | 116.82             |
| A_68_P30621545 | chr16:26581869-26581913                           | NM_134103:100             | Il1rap        | INSIDE                 | 0.276                                                        | 0.543                          | 1535.69            | 834.13             | 0.150                          | 1253.52            | 188.11             |
| A_68_P27922757 | chr11:74652026-74652070                           | NM_010813:7623            | Mnt           | INSIDE                 | 0.276                                                        | 0.595                          | 1916.07            | 1140.92            | 0.164                          | 1581.50            | 259.85             |
| A_68_P28178576 | chr11:119408102-119408146                         | NM_008730:1010            | Nptx1         | INSIDE                 | 0.276                                                        | 0.650                          | 1013.18            | 658.50             | 0.179                          | 666.32             | 119.32             |
| A_68_P28052466 | chr11:97606492-97606536                           | NM_054051:-496            | Pip4k2b       | PROMOTER               | 0.276                                                        | 0.584                          | 2592.54            | 1514.05            | 0.161                          | 1842.31            | 297.34             |
| A_68_P24538901 | chr6:71859383-71859431                            | NM_009088:360             | Polr1a        | INSIDE                 | 0.276                                                        | 0.687                          | 1229.99            | 844.63             | 0.189                          | 871.66             | 165.02             |
| A_68_P30426166 | chr15:89421992-89422040                           | NM_026817:338             | Rabl2         | INSIDE                 | 0.276                                                        | 0.526                          | 1238.52            | 651.34             | 0.145                          | 816.93             | 118.47             |
| A_68_P26766610 | chr9:99771206-99771250                            | NM_011440:5361            | Sox14         | DOWNSTREAM             | 0.276                                                        | 1.584                          | 2458.98            | 3895.31            | 0.438                          | 1555.38            | 681.07             |
| A_68_P28100097 | chr11:106055038-106055082                         | NM_028126:-198            | Strada        | PROMOTER               | 0.276                                                        | 0.564                          | 2868.73            | 1617.07            | 0.156                          | 2206.11            | 343.13             |
| A_68_P31197213 | chr17:44914413-44914457                           | NM_178652:315             | Supt3h        | INSIDE                 | 0.276                                                        | 0.523                          | 1541.87            | 807.13             | 0.145                          | 1330.11            | 192.22             |
| A_68_P22349233 | chr3:96218809-96218853                            | NR_001579:-74             | Terc          | PROMOTER               | 0.276                                                        | 0.669                          | 2629.17            | 1759.65            | 0.185                          | 2121.83            | 392.50             |
| A_68_P24153541 | chr5:143578202-143578246                          | NM_001122730:842          | Tnrc18        | INSIDE                 | 0.276                                                        | 0.445                          | 1329.77            | 591.54             | 0.123                          | 985.09             | 121.07             |
| A_68_P22218907 | chr3:68848966-68849010                            | NM_025863:-324            | Trim59        | PROMOTER               | 0.276                                                        | 0.478                          | 1197.29            | 571.94             | 0.132                          | 927.40             | 122.43             |
| A_68_P30572236 | chr16:17147632-17147677                           | NM_026940:595             | Ydjc          | INSIDE                 | 0.276                                                        | 0.504                          | 1137.45            | 573.08             | 0.139                          | 826.87             | 115.16             |
| A_68_P27992048 | chr11:86806873-86806917                           | NM_001005341:370          | Ypel2         | INSIDE                 | 0.276                                                        | 0.558                          | 1442.28            | 804.89             | 0.154                          | 1067.92            | 164.24             |
| A_68_P29053295 | chr13:55206803-55206847                           | NM_012017:155             | Zfp346        | INSIDE                 | 0.276                                                        | 0.603                          | 4070.91            | 2454.59            | 0.166                          | 2887.16            | 480.19             |
| A_68_P27269572 | chr10:77127362-77127406                           |                           |               | Unknown                | 0.276                                                        | 1.694                          | 1503.03            | 2546.41            | 0.468                          | 1004.14            | 469.69             |
| A_68_P26218683 | chr8:122753604-122753648                          | ENSMUST00000127664:318886 |               | INSIDE                 | 0.276                                                        | 0.628                          | 1051.85            | 660.38             | 0.173                          | 762.22             | 132.14             |
| A_68_P26568902 | chr9:61970547-61970591                            | mmu-mir-5133:-167         |               | PROMOTER               | 0.276                                                        | 0.439                          | 1231.09            | 540.01             | 0.121                          | 996.84             | 120.87             |
| A_68_P31102483 | chr17:25377069-25377113                           | NM_001163718:-24          | 0610007P22Rik | DIVERGENT_PROMOTER     | 0.275                                                        | 0.365                          | 1564.68            | 570.88             | 0.100                          | 1276.81            | 127.95             |
| A_68_P22958317 | chr4:59796668-59796712                            | NM_001013577:37           | 1110054O05Rik | INSIDE                 | 0.275                                                        | 0.528                          | 5380.06            | 2838.36            | 0.145                          | 4209.44            | 611.65             |
| A_68_P28788254 | chr13:3477478-3477522                             | NR_015522:-48             | 2810429I04Rik | PROMOTER               | 0.275                                                        | 0.649                          | 3641.31            | 2362.40            | 0.178                          | 2668.69            | 475.74             |
| A_68_P27787096 | chr11:49988189-49988233                           | NM_026543:-142            | 3010026O09Rik | PROMOTER               | 0.275                                                        | 0.462                          | 1569.17            | 725.65             | 0.127                          | 1145.00            | 145.41             |

| ProbeName      | Target position of probe on CpG island microarray | TargetID               | GeneSymbol    | CpG island Description | Ratio of relative methylation (TiO <sub>2</sub> -NP/Vehicle) | Sham group                     |                    |                    | TiO <sub>2</sub> -H group      |                    |                    |
|----------------|---------------------------------------------------|------------------------|---------------|------------------------|--------------------------------------------------------------|--------------------------------|--------------------|--------------------|--------------------------------|--------------------|--------------------|
|                |                                                   |                        |               |                        |                                                              | Relative methylation (Cy5/Cy3) | Cy3 signal (Input) | Cy5 signal (MeDIP) | Relative methylation (Cy5/Cy3) | Cy3 signal (Input) | Cy5 signal (MeDIP) |
| A_68_P32180645 | chr19:53217074-53217118                           | NM_001164100:-149      | Add3          | PROMOTER               | 0.275                                                        | 0.597                          | 1953.21            | 1166.94            | 0.164                          | 1459.23            | 239.73             |
| A_68_P26569949 | chr9:62188962-62189006                            | NM_009672:-165         | Amp32a        | PROMOTER               | 0.275                                                        | 0.481                          | 3395.66            | 1634.79            | 0.132                          | 2513.84            | 332.86             |
| A_68_P23430519 | chr4:153674176-153674220                          | NM_001112744:-194      | Arhgef16      | PROMOTER               | 0.275                                                        | 0.426                          | 3011.20            | 1283.74            | 0.117                          | 2347.81            | 275.15             |
| A_68_P26818137 | chr9:108976539-108976583                          | NM_172774:78           | Atrip         | INSIDE                 | 0.275                                                        | 0.644                          | 4735.75            | 3049.07            | 0.177                          | 3476.43            | 615.89             |
| A_68_P24055179 | chr5:123794010-123794061                          | NM_029850:-421         | Bcl7a         | PROMOTER               | 0.275                                                        | 0.488                          | 1083.41            | 529.08             | 0.134                          | 900.64             | 121.10             |
| A_68_P32592614 | chrX:106029534-106029578                          | NM_001081477:138       | Brwd3         | INSIDE                 | 0.275                                                        | 2.326                          | 4733.30            | 11008.85           | 0.639                          | 1847.91            | 1180.65            |
| A_68_P26814949 | chr9:108355021-108355065                          | NM_133744:-7806        | Ccdc71        | PROMOTER               | 0.275                                                        | 0.418                          | 1408.81            | 588.95             | 0.115                          | 1134.04            | 130.56             |
| A_68_P32099201 | chr19:38129127-38129171                           | NM_028293:-366         | Cep55         | PROMOTER               | 0.275                                                        | 1.940                          | 12468.12           | 24188.29           | 0.533                          | 7872.86            | 4194.58            |
| A_68_P20551449 | chr1:120285275-120285326                          | NM_001081276:-334      | Clasp1        | PROMOTER               | 0.275                                                        | 0.560                          | 1224.74            | 686.25             | 0.154                          | 880.76             | 135.94             |
| A_68_P31928179 | chr19:5349318-5349363                             | NM_028623:234          | Cst6          | INSIDE                 | 0.275                                                        | 0.450                          | 2286.28            | 1028.02            | 0.124                          | 1811.51            | 223.91             |
| A_68_P26135025 | chr8:108159869-108159913                          | NM_181322:-547         | Ctcf          | PROMOTER               | 0.275                                                        | 0.481                          | 1876.65            | 902.22             | 0.132                          | 1343.38            | 177.67             |
| A_68_P26527199 | chr9:54547693-54547737                            | NM_021422:349          | Dnaj4         | INSIDE                 | 0.275                                                        | 0.556                          | 1005.14            | 558.46             | 0.153                          | 768.88             | 117.48             |
| A_68_P20383167 | chr1:80754578-80754622                            | NM_175291:528          | Dock10        | INSIDE                 | 0.275                                                        | 0.671                          | 3548.93            | 2381.70            | 0.185                          | 2794.36            | 515.67             |
| A_68_P29660083 | chr14:63864272-63864316                           | NM_008092:-197         | Gata4         | PROMOTER               | 0.275                                                        | 0.528                          | 3707.11            | 1958.58            | 0.145                          | 2991.53            | 434.68             |
| A_68_P24078732 | chr5:128112557-128112601                          | NM_177005:-53          | Gli1d1        | PROMOTER               | 0.275                                                        | 0.655                          | 2080.08            | 1363.22            | 0.180                          | 1648.89            | 296.76             |
| A_68_P25533778 | chr7:139507346-139507390                          | NR_028578:22           | Gm10584       | INSIDE                 | 0.275                                                        | 0.483                          | 3417.22            | 1651.74            | 0.133                          | 2367.90            | 314.29             |
| A_68_P25678155 | chr8:15010976-15011020                            | NM_029116:-26          | Kbtbd11       | PROMOTER               | 0.275                                                        | 0.533                          | 1164.45            | 621.09             | 0.146                          | 820.89             | 120.24             |
| A_68_P31930911 | chr19:5803095-5803139                             | NR_002847:-445         | Malat1        | PROMOTER               | 0.275                                                        | 0.622                          | 946.67             | 589.23             | 0.171                          | 703.84             | 120.52             |
| A_68_P26019014 | chr8:86780727-86780772                            | NM_026423:474          | Mri1          | INSIDE                 | 0.275                                                        | 1.820                          | 1382.34            | 2516.20            | 0.500                          | 1033.50            | 516.86             |
| A_68_P27553885 | chr11:3661656-3661712                             | NM_152818:102222       | Osbp2         | INSIDE                 | 0.275                                                        | 0.462                          | 1229.09            | 567.60             | 0.127                          | 985.74             | 125.03             |
| A_68_P24438209 | chr6:50405431-50405477                            | NM_001163645:715       | Osbpl3        | INSIDE                 | 0.275                                                        | 0.562                          | 1096.61            | 616.10             | 0.155                          | 803.08             | 124.16             |
| A_68_P28041006 | chr11:95685266-95685311                           | NM_153104:-525         | Phospho1      | PROMOTER               | 0.275                                                        | 0.550                          | 939.14             | 516.98             | 0.152                          | 796.29             | 120.65             |
| A_68_P27230700 | chr10:70061466-70061510                           | NM_001162846:-5928     | Phyhlpl       | PROMOTER               | 0.275                                                        | 0.519                          | 1106.01            | 573.61             | 0.143                          | 910.16             | 129.83             |
| A_68_P24770498 | chr6:115311955-115311999                          | NM_001127330:738       | Pparg         | INSIDE                 | 0.275                                                        | 0.496                          | 1107.89            | 549.64             | 0.137                          | 905.46             | 123.74             |
| A_68_P21138680 | chr2:36086050-36086094                            | NM_008969:127          | Ptgs1         | INSIDE                 | 0.275                                                        | 0.424                          | 2870.32            | 1216.90            | 0.117                          | 2218.77            | 258.87             |
| A_68_P24040031 | chr5:121099444-121099488                          | NM_013832:636          | Rasal1        | INSIDE                 | 0.275                                                        | 0.569                          | 1124.74            | 640.49             | 0.157                          | 921.54             | 144.51             |
| A_68_P24054157 | chr5:123592214-123592258                          | NM_175092:-9598        | RhoF          | PROMOTER               | 0.275                                                        | 0.734                          | 2218.10            | 1628.65            | 0.202                          | 1766.95            | 357.29             |
| A_68_P22864089 | chr4:41687680-41687724                            | NM_011014:484          | Sigmar1       | INSIDE                 | 0.275                                                        | 0.517                          | 2643.94            | 1365.98            | 0.142                          | 1826.63            | 259.12             |
| A_68_P22392363 | chr3:104442146-104442191                          | NM_009196:-422         | Slc16a1       | PROMOTER               | 0.275                                                        | 0.374                          | 1638.66            | 613.26             | 0.103                          | 1156.77            | 119.10             |
| A_68_P26750963 | chr9:97011708-97011752                            | NM_138756:-270         | Slc25a36      | PROMOTER               | 0.275                                                        | 0.510                          | 1489.71            | 759.94             | 0.140                          | 1255.09            | 175.96             |
| A_68_P28332015 | chr12:32244658-32244702                           | NM_011867:154          | Slc26a4       | INSIDE                 | 0.275                                                        | 0.575                          | 1918.56            | 1103.79            | 0.158                          | 1386.50            | 219.63             |
| A_68_P22963968 | chr4:62021675-62021719                            | NM_175090:-38          | Slc31a1       | DIVERGENT_PROMOTER     | 0.275                                                        | 0.486                          | 2719.08            | 1322.52            | 0.134                          | 1958.93            | 262.22             |
| A_68_P25604004 | chr7:151163627-151163676                          |                        | Unknown       |                        | 0.275                                                        | 0.627                          | 942.56             | 590.74             | 0.172                          | 675.92             | 116.46             |
| A_68_P25761251 | chr8:33119625-33119669                            | ENSMUST00000080782:-65 |               | PROMOTER               | 0.275                                                        | 0.430                          | 1262.48            | 543.12             | 0.118                          | 984.62             | 116.55             |
| A_68_P21341870 | chr2:74975798-74975843                            | ENSMUST00000143898:35  |               | INSIDE                 | 0.275                                                        | 0.394                          | 1568.61            | 618.20             | 0.108                          | 1315.17            | 142.51             |
| A_68_P21626541 | chr2:129626864-129626913                          | NR_029452:307          | 4932416H05Rik | INSIDE                 | 0.274                                                        | 0.558                          | 1137.42            | 634.55             | 0.153                          | 793.43             | 121.37             |
| A_68_P23548816 | chr5:25266039-25266083                            | NM_001004365:217       | Actr3b        | INSIDE                 | 0.274                                                        | 1.719                          | 13031.31           | 22401.81           | 0.472                          | 8506.81            | 4013.59            |
| A_68_P25017993 | chr7:28377186-28377230                            | NM_001110208:630       | Akt2          | INSIDE                 | 0.274                                                        | 0.697                          | 2136.42            | 1489.41            | 0.191                          | 1819.26            | 346.88             |
| A_68_P25500902 | chr7:133646038-133646082                          | NM_183020:756          | Atxn2l        | INSIDE                 | 0.274                                                        | 0.469                          | 1481.07            | 695.32             | 0.128                          | 1165.36            | 149.66             |
| A_68_P23961352 | chr5:106886727-106886771                          | NM_001005477:437       | Barhl2        | INSIDE                 | 0.274                                                        | 0.495                          | 2262.70            | 1119.67            | 0.135                          | 1646.56            | 222.88             |
| A_68_P32260574 | chrX:11705655-11705699                            | NM_001168321:31805     | Bcor          | INSIDE                 | 0.274                                                        | 1.667                          | 5079.86            | 8467.01            | 0.456                          | 1843.53            | 841.12             |
| A_68_P32459814 | chrX:70163539-70163583                            | NM_019405:123          | Cetn2         | INSIDE                 | 0.274                                                        | 1.811                          | 1351.75            | 2447.48            | 0.496                          | 519.22             | 257.64             |
| A_68_P24994312 | chr7:20189858-20189902                            | NM_016680:-63          | Clasrp        | PROMOTER               | 0.274                                                        | 0.537                          | 1872.87            | 1006.07            | 0.147                          | 1489.84            | 219.38             |
| A_68_P28525478 | chr12:72411253-72411297                           | NM_001190466:404       | Dact1         | INSIDE                 | 0.274                                                        | 0.603                          | 1095.25            | 660.89             | 0.165                          | 781.86             | 129.22             |
| A_68_P24118893 | chr5:136470543-136470598                          | NM_023742:-176         | Dtx2          | PROMOTER               | 0.274                                                        | 0.615                          | 983.42             | 604.71             | 0.169                          | 910.04             | 153.37             |
| A_68_P25952515 | chr8:73062683-73062729                            | NM_007924:-867         | Eilf          | PROMOTER               | 0.274                                                        | 1.486                          | 2985.15            | 4436.35            | 0.407                          | 1808.70            | 736.48             |
| A_68_P22149161 | chr3:54496698-54496742                            | NM_019995:-306         | Fam48a        | PROMOTER               | 0.274                                                        | 0.725                          | 1682.31            | 1220.29            | 0.199                          | 1260.47            | 250.22             |
| A_68_P29386050 | chr14:8650925-8650970                             | NM_134080:477          | Flnb          | INSIDE                 | 0.274                                                        | 0.496                          | 1103.67            | 547.52             | 0.136                          | 868.91             | 117.93             |
| A_68_P31876072 | chr18:82575840-82575884                           | NM_008082:307          | Galr1         | INSIDE                 | 0.274                                                        | 0.550                          | 2060.59            | 1133.84            | 0.151                          | 1520.48            | 229.52             |
| A_68_P28833514 | chr13:12742271-12742315                           | NR_003568:370          | Gpr137b-ps    | INSIDE                 | 0.274                                                        | 0.479                          | 1584.31            | 759.23             | 0.131                          | 1308.74            | 171.55             |
| A_68_P28883366 | chr13:23853149-23853193                           | NM_178192:-144         | Hist1h4a      | PROMOTER               | 0.274                                                        | 0.509                          | 1158.81            | 589.30             | 0.140                          | 857.37             | 119.61             |

| ProbeName      | Target position of probe on CpG island microarray | TargetID          | GeneSymbol | CpG island Description | Ratio of relative methylation (TiO <sub>2</sub> -NP/Vehicle) | Sham group                     |                    |                    | TiO <sub>2</sub> -H group      |                    |                    |
|----------------|---------------------------------------------------|-------------------|------------|------------------------|--------------------------------------------------------------|--------------------------------|--------------------|--------------------|--------------------------------|--------------------|--------------------|
|                |                                                   |                   |            |                        |                                                              | Relative methylation (Cy5/Cy3) | Cy3 signal (Input) | Cy5 signal (MeDIP) | Relative methylation (Cy5/Cy3) | Cy3 signal (Input) | Cy5 signal (MeDIP) |
| A_68_P28748139 | chr12:113383755-113383799                         | NM_001097621:-642 | Kif26a     | PROMOTER               | 0.274                                                        | 0.645                          | 1160.96            | 749.22             | 0.177                          | 791.19             | 140.04             |
| A_68_P26192682 | chr8:118231333-118231382                          | NM_001025577:-563 | Maf        | PROMOTER               | 0.274                                                        | 0.531                          | 1446.93            | 768.66             | 0.146                          | 1192.45            | 173.59             |
| A_68_P24946853 | chr7:3644138-3644182                              | NM_029934:967     | Mboat7     | INSIDE                 | 0.274                                                        | 0.511                          | 1155.74            | 591.04             | 0.140                          | 868.71             | 121.60             |
| A_68_P25664801 | chr8:12915981-12916035                            | NM_178076:116     | Mef2l      | INSIDE                 | 0.274                                                        | 0.689                          | 1297.83            | 894.77             | 0.189                          | 959.41             | 181.19             |
| A_68_P30082171 | chr15:25552353-25552397                           | NM_019472:70      | Myo10      | INSIDE                 | 0.274                                                        | 0.499                          | 2761.04            | 1376.67            | 0.137                          | 1900.34            | 259.65             |
| A_68_P32148153 | chr19:47254029-47254073                           | NM_021360:741     | Neur11a    | INSIDE                 | 0.274                                                        | 0.719                          | 2005.46            | 1442.43            | 0.197                          | 1556.76            | 307.34             |
| A_68_P25144263 | chr7:63217306-63217365                            | NM_023647:485     | Nipa2      | INSIDE                 | 0.274                                                        | 0.462                          | 1255.49            | 580.62             | 0.127                          | 952.08             | 120.51             |
| A_68_P21089693 | chr2:28061497-28061541                            | NM_001038612:310  | Olfml1     | INSIDE                 | 0.274                                                        | 0.276                          | 2136.67            | 589.05             | 0.076                          | 1666.45            | 125.96             |
| A_68_P21769996 | chr2:156022460-156022504                          | NM_172674:100     | Phf20      | INSIDE                 | 0.274                                                        | 0.405                          | 1428.89            | 578.54             | 0.111                          | 1123.25            | 124.64             |
| A_68_P31162035 | chr17:36116527-36116571                           | NM_145487:-136    | Prr3       | PROMOTER               | 0.274                                                        | 0.516                          | 2389.16            | 1231.91            | 0.141                          | 1976.97            | 279.50             |
| A_68_P21117413 | chr2:32631242-32631286                            | NM_178595:-76     | Pth1       | DIVERGENT_PROMOTER     | 0.274                                                        | 0.405                          | 1300.18            | 526.14             | 0.111                          | 1049.75            | 116.57             |
| A_68_P30518123 | chr16:5885155-5885211                             | NM_021477:297     | Rbfox1     | INSIDE                 | 0.274                                                        | 0.595                          | 1352.88            | 805.35             | 0.163                          | 1019.62            | 166.57             |
| A_68_P27924775 | chr11:75008355-75008401                           | NM_177708:884     | Rtn4rl1    | INSIDE                 | 0.274                                                        | 0.413                          | 1547.24            | 638.93             | 0.113                          | 1025.14            | 116.19             |
| A_68_P20370950 | chr1:78306691-78306735                            | NM_001004173:-208 | Sgpp2      | PROMOTER               | 0.274                                                        | 0.506                          | 2193.77            | 1109.05            | 0.139                          | 1814.46            | 251.35             |
| A_68_P28168285 | chr11:117830022-117830066                         | NM_007707:636     | Soes3      | INSIDE                 | 0.274                                                        | 0.580                          | 1701.31            | 987.33             | 0.159                          | 1192.17            | 189.29             |
| A_68_P31958015 | chr19:11893696-11893748                           | NM_011502:-339    | Stx3       | PROMOTER               | 0.274                                                        | 0.644                          | 895.93             | 577.08             | 0.176                          | 690.83             | 121.89             |
| A_68_P28524523 | chr12:72237247-72237292                           | NM_001024853:393  | Timm9      | INSIDE                 | 0.274                                                        | 0.417                          | 1285.30            | 536.13             | 0.114                          | 1046.67            | 119.56             |
| A_68_P25469458 | chr7:127779197-127779246                          | NM_025899:519     | Uqcr2      | INSIDE                 | 0.274                                                        | 0.480                          | 1509.41            | 723.99             | 0.131                          | 1071.55            | 140.69             |
| A_68_P21085240 | chr2:27395797-27395841                            | NM_080848:25152   | Wdr5       | DOWNSTREAM             | 0.274                                                        | 0.468                          | 1597.32            | 747.42             | 0.128                          | 1382.51            | 177.34             |
| A_68_P23591880 | chr5:34279319-34279363                            | NM_011914:-433    | Whse2      | PROMOTER               | 0.274                                                        | 0.496                          | 1170.62            | 580.93             | 0.136                          | 1024.26            | 139.05             |
| A_68_P30476373 | chr15:98603197-98603241                           | NM_011718:5363    | Wnt10b     | INSIDE                 | 0.274                                                        | 0.531                          | 973.68             | 517.09             | 0.146                          | 820.13             | 119.40             |
| A_68_P30140507 | chr15:36723784-36723828                           | NM_011740:487     | Ywhaz      | INSIDE                 | 0.274                                                        | 0.637                          | 810.77             | 516.51             | 0.175                          | 688.21             | 120.32             |
| A_68_P25258775 | chr7:86198137-86198181                            | NM_007424:-210    | Acan       | PROMOTER               | 0.273                                                        | 0.563                          | 2377.74            | 1339.81            | 0.154                          | 1854.72            | 285.27             |
| A_68_P21784026 | chr2:158450747-158450791                          | NM_175419:120     | Actr5      | INSIDE                 | 0.273                                                        | 0.659                          | 2060.57            | 1357.21            | 0.180                          | 1368.50            | 246.22             |
| A_68_P32186046 | chr19:54119698-54119742                           | NM_007417:49      | Adra2a     | INSIDE                 | 0.273                                                        | 0.511                          | 1098.89            | 561.95             | 0.140                          | 866.41             | 120.92             |
| A_68_P30421417 | chr15:88649565-88649609                           | NM_001142357:162  | Alg12      | INSIDE                 | 0.273                                                        | 0.543                          | 1595.05            | 866.27             | 0.148                          | 1265.72            | 187.67             |
| A_68_P26595212 | chr9:66643626-66643670                            | NM_177583:-418    | Aph1b      | PROMOTER               | 0.273                                                        | 0.575                          | 2855.08            | 1642.69            | 0.157                          | 2129.20            | 334.72             |
| A_68_P28195046 | chr12:3427021-3427065                             | NM_172421:159     | Asx12      | INSIDE                 | 0.273                                                        | 0.518                          | 1125.85            | 583.05             | 0.141                          | 956.58             | 135.04             |
| A_68_P30246252 | chr15:57966703-57966747                           | NM_027435:-87     | Atad2      | DIVERGENT_PROMOTER     | 0.273                                                        | 0.396                          | 1933.52            | 766.20             | 0.108                          | 1613.12            | 174.67             |
| A_68_P31099851 | chr17:24986997-24987041                           | NM_023480:229     | Fahd1      | INSIDE                 | 0.273                                                        | 0.608                          | 945.82             | 575.36             | 0.166                          | 731.33             | 121.44             |
| A_68_P23979395 | chr5:110815816-110815860                          | NM_028596:308     | Fbrs11     | INSIDE                 | 0.273                                                        | 0.553                          | 1392.97            | 770.15             | 0.151                          | 1216.14            | 183.39             |
| A_68_P23973155 | chr5:109058342-109058386                          | NM_153569:394     | Gak        | INSIDE                 | 0.273                                                        | 0.621                          | 1598.27            | 991.75             | 0.169                          | 1173.02            | 198.75             |
| A_68_P23438946 | chr4:154866208-154866252                          | NM_001160016:761  | Gnb1       | INSIDE                 | 0.273                                                        | 0.489                          | 2009.40            | 983.07             | 0.134                          | 1514.53            | 202.52             |
| A_68_P27581116 | chr11:8911066-8911110                             | NM_008316:52      | Hus1       | INSIDE                 | 0.273                                                        | 0.739                          | 2270.54            | 1677.16            | 0.201                          | 1638.68            | 330.14             |
| A_68_P23297601 | chr4:129296491-129296543                          | NM_198026:-179    | Iqcc       | PROMOTER               | 0.273                                                        | 0.658                          | 823.66             | 542.29             | 0.180                          | 657.74             | 118.15             |
| A_68_P23752952 | chr5:65195598-65195642                            | NM_008453:859     | Klf3       | INSIDE                 | 0.273                                                        | 0.420                          | 1300.66            | 546.35             | 0.115                          | 1043.43            | 119.55             |
| A_68_P29842704 | chr14:99698682-99698726                           | NM_009769:795     | Klf5       | INSIDE                 | 0.273                                                        | 0.515                          | 1114.89            | 574.59             | 0.140                          | 859.70             | 120.74             |
| A_68_P30424716 | chr15:89185877-89185921                           | NM_178919:192     | Lmf2       | INSIDE                 | 0.273                                                        | 0.364                          | 1616.69            | 588.23             | 0.099                          | 1185.44            | 117.79             |
| A_68_P27855086 | chr11:62462305-62462349                           | NM_175002:161     | Mmgt2      | INSIDE                 | 0.273                                                        | 0.670                          | 1593.12            | 1067.87            | 0.183                          | 1107.38            | 203.00             |
| A_68_P26075855 | chr8:96696139-96696185                            | NM_008630:-355    | Mt2        | PROMOTER               | 0.273                                                        | 0.652                          | 1159.31            | 755.79             | 0.178                          | 994.54             | 177.13             |
| A_68_P23057176 | chr4:82151139-82151183                            | NM_001113209:52   | Nfib       | INSIDE                 | 0.273                                                        | 0.700                          | 1996.42            | 1398.11            | 0.191                          | 1418.21            | 271.28             |
| A_68_P27900561 | chr11:70223294-70223338                           | NM_029231:217     | Pelp1      | INSIDE                 | 0.273                                                        | 0.661                          | 1311.25            | 866.90             | 0.180                          | 1027.67            | 185.49             |
| A_68_P23577162 | chr5:31523190-31523234                            | NM_008014:-294    | Ppm1g      | PROMOTER               | 0.273                                                        | 0.517                          | 1770.88            | 914.90             | 0.141                          | 1231.46            | 173.56             |
| A_68_P23610087 | chr5:37260107-37260152                            | NM_172994:321     | Ppp2r2c    | INSIDE                 | 0.273                                                        | 0.501                          | 1025.47            | 514.19             | 0.137                          | 886.49             | 121.48             |
| A_68_P24170315 | chr5:147644587-147644631                          | NM_019647:143     | Rpl21      | INSIDE                 | 0.273                                                        | 0.428                          | 1357.42            | 580.44             | 0.117                          | 1039.87            | 121.44             |
| A_68_P28073901 | chr11:101303846-101303890                         | NM_011289:310     | Rpl27      | INSIDE                 | 0.273                                                        | 0.501                          | 1070.54            | 536.15             | 0.137                          | 879.78             | 120.31             |
| A_68_P25378792 | chr7:109590509-109590553                          | NM_009103:322     | Rrm1       | INSIDE                 | 0.273                                                        | 0.658                          | 1384.13            | 911.23             | 0.180                          | 903.12             | 162.28             |
| A_68_P32926581 | chr13:93381448-93381492                           | NM_172588:378     | Serinc5    | INSIDE                 | 0.273                                                        | 0.505                          | 1092.29            | 552.12             | 0.138                          | 893.39             | 123.25             |
| A_68_P20585379 | chr1:127457276-127457320                          | NM_028787:-294    | Slc35f5    | PROMOTER               | 0.273                                                        | 0.655                          | 826.55             | 541.37             | 0.179                          | 704.50             | 125.89             |
| A_68_P20628459 | chr1:135506499-135506543                          | NM_009227:337     | Snrpe      | INSIDE                 | 0.273                                                        | 0.660                          | 4416.18            | 2913.10            | 0.180                          | 3339.08            | 600.44             |
| A_68_P29879699 | chr14:106294307-106294351                         | NM_011897:1708    | Spry2      | INSIDE                 | 0.273                                                        | 0.616                          | 3758.28            | 2313.71            | 0.168                          | 2666.38            | 448.47             |

| ProbeName      | Target position of probe on CpG island microarray | TargetID          | GeneSymbol    | CpG island Description | Ratio of relative methylation (TiO <sub>2</sub> -NP/Vehicle) | Sham group                     |                    |                    | TiO <sub>2</sub> -H group      |                    |                    |
|----------------|---------------------------------------------------|-------------------|---------------|------------------------|--------------------------------------------------------------|--------------------------------|--------------------|--------------------|--------------------------------|--------------------|--------------------|
|                |                                                   |                   |               |                        |                                                              | Relative methylation (Cy5/Cy3) | Cy3 signal (Input) | Cy5 signal (MeDIP) | Relative methylation (Cy5/Cy3) | Cy3 signal (Input) | Cy5 signal (MeDIP) |
| A_68_P22200389 | chr3:65332655-65332699                            | NM_178892:308     | Tiparp        | INSIDE                 | 0.273                                                        | 0.582                          | 1856.08            | 1080.83            | 0.159                          | 1515.63            | 241.15             |
| A_68_P21574793 | chr2:120178464-120178508                          | NM_147153:383     | Vps39         | INSIDE                 | 0.273                                                        | 0.459                          | 1625.73            | 745.88             | 0.125                          | 1311.91            | 164.56             |
| A_68_P28119630 | chr11:109472954-109472998                         | NM_145940:-273    | Wipi1         | PROMOTER               | 0.273                                                        | 0.702                          | 9981.09            | 7006.85            | 0.192                          | 7927.89            | 1522.00            |
| A_68_P30344507 | chr15:75672464-75672508                           | NM_172121:-148    | Zc3h3         | PROMOTER               | 0.273                                                        | 0.426                          | 1350.14            | 574.93             | 0.116                          | 1049.25            | 121.93             |
| A_68_P30261318 | chr15:60654478-60654526                           | NR_030696:-17     | 9930014A18Rik | PROMOTER               | 0.272                                                        | 0.528                          | 1085.91            | 572.91             | 0.144                          | 840.37             | 120.70             |
| A_68_P22410426 | chr3:107889144-107889188                          | NM_028779:379     | Ampd2         | INSIDE                 | 0.272                                                        | 0.392                          | 1509.32            | 590.95             | 0.106                          | 1141.85            | 121.45             |
| A_68_P23439689 | chr4:154998937-154998981                          | NM_007661:-19     | Cdk11b        | PROMOTER               | 0.272                                                        | 0.528                          | 1003.84            | 529.90             | 0.144                          | 872.08             | 125.29             |
| A_68_P24818639 | chr6:125046323-125046367                          | NM_145979:164     | Chd4          | INSIDE                 | 0.272                                                        | 0.298                          | 2233.34            | 665.25             | 0.081                          | 1657.90            | 134.33             |
| A_68_P23254630 | chr4:120712227-120712271                          | NM_007741:78      | Col9a2        | INSIDE                 | 0.272                                                        | 0.592                          | 1082.22            | 640.95             | 0.161                          | 890.79             | 143.52             |
| A_68_P25588174 | chr7:148513704-148513752                          | NM_016874:-104    | Deaf1         | DIVERGENT_PROMOTER     | 0.272                                                        | 0.531                          | 1000.56            | 531.62             | 0.145                          | 805.47             | 116.56             |
| A_68_P26584122 | chr9:64659329-64659373                            | NM_001162917:533  | Dennd4a       | INSIDE                 | 0.272                                                        | 0.598                          | 4331.66            | 2591.77            | 0.163                          | 3237.48            | 527.72             |
| A_68_P28332515 | chr12:32339615-32339664                           | NM_028002:52      | Dus4l         | INSIDE                 | 0.272                                                        | 0.567                          | 1352.00            | 766.46             | 0.154                          | 1092.96            | 168.75             |
| A_68_P26135514 | chr8:108231844-108231888                          | NM_198299:202     | E130303B06Rik | INSIDE                 | 0.272                                                        | 0.540                          | 1060.09            | 572.21             | 0.147                          | 789.68             | 115.78             |
| A_68_P23981800 | chr5:111199966-111200010                          | NM_029337:-252    | Ep400         | PROMOTER               | 0.272                                                        | 0.306                          | 1779.38            | 543.62             | 0.083                          | 1446.64            | 120.14             |
| A_68_P26693197 | chr9:85221191-85221249                            | NM_001160379:-463 | Fam46a        | PROMOTER               | 0.272                                                        | 0.409                          | 1273.95            | 521.15             | 0.111                          | 1062.68            | 118.15             |
| A_68_P20294241 | chr1:64781408-64781452                            | NM_001042659:2894 | Fzd5          | INSIDE                 | 0.272                                                        | 0.599                          | 1039.29            | 622.94             | 0.163                          | 784.86             | 127.76             |
| A_68_P23787825 | chr5:72092392-72092436                            | NM_008069:1160    | Gabrb1        | INSIDE                 | 0.272                                                        | 0.496                          | 1200.92            | 595.31             | 0.135                          | 904.97             | 121.84             |
| A_68_P27286409 | chr10:80393272-80393316                           | NM_008655:459     | Gadd45b       | INSIDE                 | 0.272                                                        | 0.492                          | 3524.87            | 1733.92            | 0.134                          | 2502.37            | 335.36             |
| A_68_P28043171 | chr11:96113156-96113200                           | NR_037977:205     | Gm53          | INSIDE                 | 0.272                                                        | 0.525                          | 1062.94            | 557.89             | 0.143                          | 813.18             | 116.18             |
| A_68_P24611769 | chr6:86683533-86683577                            | NM_011818:-182    | Gmcl1         | PROMOTER               | 0.272                                                        | 0.645                          | 819.39             | 528.22             | 0.175                          | 687.12             | 120.47             |
| A_68_P24142814 | chr5:141178050-141178094                          | NM_028833:260     | Iqcc          | INSIDE                 | 0.272                                                        | 0.508                          | 2849.60            | 1446.95            | 0.138                          | 2303.75            | 318.65             |
| A_68_P23399815 | chr4:148682002-148682046                          | NM_207682:-217    | Kif1b         | PROMOTER               | 0.272                                                        | 0.665                          | 4528.99            | 3012.98            | 0.181                          | 3547.92            | 641.81             |
| A_68_P21137823 | chr2:35959065-35959110                            | NM_001083126:493  | Lhx6          | INSIDE                 | 0.272                                                        | 0.451                          | 1462.87            | 659.90             | 0.123                          | 981.61             | 120.30             |
| A_68_P26227605 | chr8:124109328-124109378                          | NM_026160:-5015   | Map1lc3b      | DIVERGENT_PROMOTER     | 0.272                                                        | 0.591                          | 995.82             | 588.63             | 0.161                          | 733.41             | 118.12             |
| A_68_P24946860 | chr7:3645012-3645069                              | NM_029934:87      | Mboat7        | INSIDE                 | 0.272                                                        | 0.425                          | 1259.44            | 535.12             | 0.116                          | 1026.35            | 118.71             |
| A_68_P23547782 | chr5:25003584-25003633                            | NM_001081383:993  | Mil3          | INSIDE                 | 0.272                                                        | 0.448                          | 1218.45            | 546.25             | 0.122                          | 988.33             | 120.52             |
| A_68_P28614145 | chr12:88443030-88443074                           | NM_022414:437     | Ngb           | INSIDE                 | 0.272                                                        | 0.554                          | 5083.73            | 2817.64            | 0.151                          | 3776.37            | 570.08             |
| A_68_P28057359 | chr11:98448749-98448807                           | NM_025661:-219    | Ormdl3        | PROMOTER               | 0.272                                                        | 0.380                          | 1387.33            | 527.27             | 0.104                          | 1146.88            | 118.76             |
| A_68_P31619153 | chr18:35758686-35758732                           | NM_026420:388     | Paip2         | INSIDE                 | 0.272                                                        | 0.448                          | 1311.64            | 587.93             | 0.122                          | 989.62             | 120.73             |
| A_68_P28107246 | chr11:107330411-107330455                         | NM_145823:1602    | Pitpnc1       | INSIDE                 | 0.272                                                        | 0.588                          | 3975.75            | 2339.59            | 0.160                          | 3186.82            | 509.66             |
| A_68_P22518744 | chr3:128917174-128917220                          | NM_001042502:342  | Pitx2         | INSIDE                 | 0.272                                                        | 0.664                          | 1138.17            | 755.21             | 0.180                          | 885.98             | 159.89             |
| A_68_P27260808 | chr10:75700481-75700530                           | NM_001077638:105  | Prmt2         | INSIDE                 | 0.272                                                        | 0.594                          | 2200.79            | 1307.97            | 0.162                          | 1495.66            | 242.19             |
| A_68_P31306703 | chr17:66868585-66868629                           | NM_024448:404     | Rab12         | INSIDE                 | 0.272                                                        | 0.538                          | 1759.09            | 945.83             | 0.146                          | 1430.87            | 209.26             |
| A_68_P26747275 | chr9:96378576-96378624                            | NM_011279:414     | Rnf7          | INSIDE                 | 0.272                                                        | 0.621                          | 908.83             | 564.60             | 0.169                          | 723.69             | 122.09             |
| A_68_P24447788 | chr6:51962397-51962441                            | NM_018773:130     | Skap2         | INSIDE                 | 0.272                                                        | 0.583                          | 1040.59            | 606.93             | 0.159                          | 746.70             | 118.55             |
| A_68_P27841612 | chr11:60024194-60024238                           | NM_011480:9890    | Srebfl1       | INSIDE                 | 0.272                                                        | 0.365                          | 1444.68            | 527.32             | 0.099                          | 1170.03            | 116.38             |
| A_68_P20885446 | chr1:184055324-184055368                          | NM_012058:479     | Srp9          | INSIDE                 | 0.272                                                        | 0.440                          | 2506.19            | 1103.56            | 0.120                          | 2066.48            | 247.19             |
| A_68_P21682255 | chr2:139892211-139892255                          | NM_175225:264     | Tasp1         | INSIDE                 | 0.272                                                        | 0.556                          | 1569.48            | 873.04             | 0.152                          | 1259.13            | 190.81             |
| A_68_P22336392 | chr3:93247658-93247702                            | NM_001163098:1429 | Tchh          | INSIDE                 | 0.272                                                        | 0.510                          | 1225.25            | 625.43             | 0.139                          | 869.52             | 120.72             |
| A_68_P21070914 | chr2:25111268-25111312                            | NM_177344:332     | Tmem203       | INSIDE                 | 0.272                                                        | 0.607                          | 3220.74            | 1954.68            | 0.165                          | 2146.38            | 354.06             |
| A_68_P31936614 | chr19:6984396-6984443                             | NM_001166370:232  | Trmt112       | INSIDE                 | 0.272                                                        | 0.397                          | 1504.42            | 597.01             | 0.108                          | 1094.70            | 118.25             |
| A_68_P21577444 | chr2:120675934-120675978                          | NM_001024856:198  | Ttk2          | INSIDE                 | 0.272                                                        | 0.591                          | 955.67             | 564.61             | 0.161                          | 771.32             | 124.01             |
| A_68_P29952198 | chr14:121229992-121230036                         |                   | Unknown       |                        | 0.272                                                        | 0.589                          | 1735.46            | 1022.59            | 0.160                          | 1358.62            | 217.83             |
| A_68_P28755046 | chr12:114394157-114394201                         | NM_134041:-453    | 4930427A07Rik | PROMOTER               | 0.271                                                        | 0.339                          | 2445.69            | 827.90             | 0.092                          | 1889.02            | 173.14             |
| A_68_P28202319 | chr12:4776061-4776106                             | NM_175431:-10     | A830093I24Rik | DIVERGENT_PROMOTER     | 0.271                                                        | 0.645                          | 1217.67            | 785.47             | 0.175                          | 1011.27            | 177.06             |
| A_68_P27932045 | chr11:76250435-76250479                           | NM_198018:72465   | Abr           | INSIDE                 | 0.271                                                        | 0.626                          | 3404.65            | 2130.45            | 0.169                          | 2601.46            | 440.86             |
| A_68_P24925475 | chr6:145812338-145812382                          | NM_024469:1500    | Bhlhe41       | INSIDE                 | 0.271                                                        | 0.434                          | 1331.73            | 577.76             | 0.118                          | 1030.57            | 121.35             |
| A_68_P31323859 | chr17:69767217-69767270                           | NR_026848:1457    | C030034I22Rik | INSIDE                 | 0.271                                                        | 0.588                          | 1073.03            | 630.54             | 0.159                          | 817.56             | 130.24             |
| A_68_P22874797 | chr4:44025966-44026010                            | NM_001080384:474  | Clta          | INSIDE                 | 0.271                                                        | 0.611                          | 872.51             | 533.24             | 0.165                          | 728.24             | 120.40             |
| A_68_P31679713 | chr18:47118783-47118827                           | NM_178377:275     | Commd10       | INSIDE                 | 0.271                                                        | 0.626                          | 1764.23            | 1104.33            | 0.170                          | 1414.72            | 240.03             |
| A_68_P23222365 | chr4:114598324-114598368                          | NM_015758:272     | Foxc3         | INSIDE                 | 0.271                                                        | 0.530                          | 1483.79            | 787.09             | 0.143                          | 1185.89            | 170.17             |

| ProbeName      | Target position of probe on CpG island microarray | TargetID                 | GeneSymbol    | CpG island Description | Ratio of relative methylation (TiO <sub>2</sub> -NP/Vehicle) | Sham group                     |                    |                    | TiO <sub>2</sub> -H group      |                    |                    |
|----------------|---------------------------------------------------|--------------------------|---------------|------------------------|--------------------------------------------------------------|--------------------------------|--------------------|--------------------|--------------------------------|--------------------|--------------------|
|                |                                                   |                          |               |                        |                                                              | Relative methylation (Cy5/Cy3) | Cy3 signal (Input) | Cy5 signal (MeDIP) | Relative methylation (Cy5/Cy3) | Cy3 signal (Input) | Cy5 signal (MeDIP) |
| A_68_P24131920 | chr5:139296987-139297031                          | NM_001195128:975         | Gm5294        | INSIDE                 | 0.271                                                        | 0.596                          | 1815.72            | 1083.07            | 0.162                          | 1460.19            | 235.83             |
| A_68_P31162851 | chr17:36304426-36304470                           | NM_001081032:1034        | Gm8909        | INSIDE                 | 0.271                                                        | 0.567                          | 2648.62            | 1501.56            | 0.154                          | 1891.47            | 291.08             |
| A_68_P31151132 | chr17:34077320-34077372                           | NM_010385:-58            | H2-Ke2        | DIVERGENT_PROMOTER     | 0.271                                                        | 0.578                          | 903.23             | 522.05             | 0.157                          | 775.07             | 121.60             |
| A_68_P23571066 | chr5:30482087-30482136                            | NM_145558:250            | Hadhb         | INSIDE                 | 0.271                                                        | 0.517                          | 1092.18            | 565.12             | 0.140                          | 831.66             | 116.82             |
| A_68_P21339318 | chr2:74587859-74587910                            | NM_010468:37835          | Hoxd3         | DOWNSTREAM             | 0.271                                                        | 0.535                          | 990.54             | 530.01             | 0.145                          | 835.08             | 121.03             |
| A_68_P29657354 | chr14:63379882-63379926                           | NM_008715:45             | Ints6         | INSIDE                 | 0.271                                                        | 0.529                          | 1051.19            | 555.92             | 0.143                          | 831.51             | 119.01             |
| A_68_P28748138 | chr12:113383612-113383656                         | NM_001097621:-784        | Kif26a        | PROMOTER               | 0.271                                                        | 0.570                          | 1017.07            | 579.61             | 0.154                          | 743.14             | 114.67             |
| A_68_P25484147 | chr7:130521434-130521478                          | NM_025304:-39            | Lcmt1         | DIVERGENT_PROMOTER     | 0.271                                                        | 0.411                          | 1585.90            | 652.59             | 0.111                          | 1099.91            | 122.53             |
| A_68_P24796456 | chr6:119988018-119988063                          | NR_030487:-3711          | Mir706        | PROMOTER               | 0.271                                                        | 0.640                          | 2373.74            | 1519.40            | 0.173                          | 1878.18            | 325.82             |
| A_68_P23567511 | chr5:29761679-29761723                            | NM_001033457:494         | Nom1          | INSIDE                 | 0.271                                                        | 0.725                          | 1879.56            | 1363.20            | 0.197                          | 1471.14            | 289.57             |
| A_68_P24164493 | chr5:145900637-145900681                          | NM_001033313:300         | Pdap1         | INSIDE                 | 0.271                                                        | 0.483                          | 1518.33            | 733.67             | 0.131                          | 1248.49            | 163.74             |
| A_68_P25953243 | chr8:73183392-73183436                            | NM_023217:166            | Pgpep1        | INSIDE                 | 0.271                                                        | 0.620                          | 1913.18            | 1185.96            | 0.168                          | 1408.27            | 236.84             |
| A_68_P29057250 | chr13:55927065-55927109                           | NM_011097:5700           | Pitx1         | INSIDE                 | 0.271                                                        | 0.589                          | 1041.08            | 612.90             | 0.160                          | 760.85             | 121.46             |
| A_68_P21870533 | chr2:173411101-173411145                          | NR_027957:73918          | Ppp4r11-ps    | INSIDE                 | 0.271                                                        | 0.517                          | 1178.09            | 608.66             | 0.140                          | 889.54             | 124.38             |
| A_68_P28334786 | chr12:32745694-32745738                           | NM_011158:428            | Prkar2b       | INSIDE                 | 0.271                                                        | 0.650                          | 1100.48            | 715.17             | 0.176                          | 804.41             | 141.51             |
| A_68_P31097945 | chr17:24670178-24670222                           | NM_177375:492            | Rab26         | INSIDE                 | 0.271                                                        | 0.509                          | 1134.52            | 577.72             | 0.138                          | 872.29             | 120.48             |
| A_68_P27899668 | chr11:70051980-70052024                           | NM_173742:1352           | Rnasek        | INSIDE                 | 0.271                                                        | 0.662                          | 2107.64            | 1396.09            | 0.179                          | 1454.29            | 260.82             |
| A_68_P21227533 | chr2:53937683-53937727                            | NM_023396:259            | Rprm          | INSIDE                 | 0.271                                                        | 0.421                          | 1379.77            | 581.23             | 0.114                          | 1078.45            | 123.26             |
| A_68_P24950803 | chr7:4795789-4795833                              | NM_172737:488            | Shisa7        | INSIDE                 | 0.271                                                        | 0.408                          | 1569.89            | 641.13             | 0.110                          | 1181.68            | 130.56             |
| A_68_P28585128 | chr12:83271163-83271207                           | NM_001167983:182         | Sipa111       | INSIDE                 | 0.271                                                        | 0.268                          | 2096.62            | 562.41             | 0.073                          | 1638.21            | 119.11             |
| A_68_P31349752 | chr17:74397147-74397191                           | NM_053188:88             | Srd5a2        | INSIDE                 | 0.271                                                        | 0.405                          | 1263.86            | 512.28             | 0.110                          | 1087.52            | 119.43             |
| A_68_P27765165 | chr11:45768563-45768620                           | NM_001080969:405         | Thg11         | INSIDE                 | 0.271                                                        | 0.507                          | 1104.46            | 559.49             | 0.138                          | 839.87             | 115.48             |
| A_68_P26579886 | chr9:63908037-63908081                            | ENSMUST00000130862:10423 |               | DOWNSTREAM             | 0.271                                                        | 0.645                          | 1340.94            | 864.55             | 0.175                          | 1099.85            | 191.99             |
| A_68_P27945544 | chr11:78640263-78640307                           | NM_001076681:188         | 1810012P15Rik | INSIDE                 | 0.270                                                        | 0.607                          | 862.96             | 523.41             | 0.164                          | 763.48             | 124.95             |
| A_68_P27279426 | chr10:79337278-79337322                           | NM_001170935:79          | BC005764      | INSIDE                 | 0.270                                                        | 0.575                          | 1006.84            | 578.86             | 0.155                          | 765.90             | 118.75             |
| A_68_P28078450 | chr11:102110241-102110285                         | NM_153544:67             | BC030867      | INSIDE                 | 0.270                                                        | 0.529                          | 1044.74            | 552.68             | 0.143                          | 859.44             | 122.64             |
| A_68_P27559363 | chr11:4645990-4646034                             | NM_138948:769            | Cabp7         | INSIDE                 | 0.270                                                        | 0.621                          | 1321.68            | 821.29             | 0.168                          | 1083.20            | 182.06             |
| A_68_P28685558 | chr12:102267375-102267419                         | NM_026681:-203           | Ccdc88c       | PROMOTER               | 0.270                                                        | 0.407                          | 1691.89            | 689.44             | 0.110                          | 1231.55            | 135.74             |
| A_68_P30475237 | chr15:98398586-98398630                           | NM_009833:-541           | Cent1         | PROMOTER               | 0.270                                                        | 0.497                          | 1171.00            | 581.59             | 0.134                          | 878.82             | 117.85             |
| A_68_P30405649 | chr15:86015668-86015712                           | NM_145475:881            | Cerk          | INSIDE                 | 0.270                                                        | 0.611                          | 952.62             | 582.38             | 0.165                          | 733.58             | 121.17             |
| A_68_P25948513 | chr8:72410234-72410278                            | NM_026818:1035           | Cilp2         | INSIDE                 | 0.270                                                        | 0.530                          | 1079.67            | 572.66             | 0.143                          | 809.33             | 115.87             |
| A_68_P30964660 | chr16:91728640-91728684                           | NM_026994:385            | Cryz11        | INSIDE                 | 0.270                                                        | 0.726                          | 2596.26            | 1885.32            | 0.196                          | 1729.11            | 338.75             |
| A_68_P29659270 | chr14:63741403-63741447                           | NM_007798:123            | Ctsb          | INSIDE                 | 0.270                                                        | 0.620                          | 2316.59            | 1435.18            | 0.167                          | 1751.69            | 293.15             |
| A_68_P28079628 | chr11:102308536-102308580                         | NM_199200:419            | Fam171a2      | INSIDE                 | 0.270                                                        | 0.556                          | 4410.99            | 2451.56            | 0.150                          | 3202.38            | 479.82             |
| A_68_P29448410 | chr14:21514889-21514933                           | NM_028428:721            | Fut11         | INSIDE                 | 0.270                                                        | 0.353                          | 1663.01            | 586.40             | 0.095                          | 1267.34            | 120.88             |
| A_68_P24449041 | chr6:52154245-52154298                            | NM_010453:315            | Hoxa5         | INSIDE                 | 0.270                                                        | 0.479                          | 1220.24            | 584.92             | 0.129                          | 921.20             | 119.11             |
| A_68_P21683843 | chr2:140221161-140221205                          | NM_028387:12             | Macrod2       | INSIDE                 | 0.270                                                        | 0.509                          | 1963.27            | 1000.00            | 0.138                          | 1607.61            | 221.42             |
| A_68_P25193391 | chr7:74516874-74516921                            | NM_001033713:847         | Mef2a         | INSIDE                 | 0.270                                                        | 0.382                          | 1531.05            | 584.82             | 0.103                          | 1173.78            | 120.84             |
| A_68_P28457458 | chr12:57637325-57637369                           | NM_001146198:-1253       | Nkx2-1        | PROMOTER               | 0.270                                                        | 0.455                          | 1415.43            | 644.37             | 0.123                          | 970.61             | 119.24             |
| A_68_P24816532 | chr6:124662438-124662482                          | NM_007531:154            | Phb2          | PROMOTER               | 0.270                                                        | 0.649                          | 854.19             | 554.53             | 0.175                          | 692.18             | 121.25             |
| A_68_P32555654 | chrX:96665945-96665989                            | NM_001083110:108         | Pja1          | INSIDE                 | 0.270                                                        | 1.528                          | 1401.52            | 2140.98            | 0.413                          | 586.99             | 242.14             |
| A_68_P24158565 | chr5:144671053-144671097                          | NM_008886:205            | Pms2          | INSIDE                 | 0.270                                                        | 0.418                          | 1317.53            | 550.65             | 0.113                          | 1036.82            | 117.10             |
| A_68_P22558734 | chr3:136332458-136332502                          | NM_008913:-1253          | Ppp3ca        | PROMOTER               | 0.270                                                        | 0.434                          | 2000.90            | 867.72             | 0.117                          | 1569.79            | 184.00             |
| A_68_P30476737 | chr15:98661589-98661633                           | NM_016781:329            | Prkag1        | INSIDE                 | 0.270                                                        | 0.494                          | 1404.42            | 693.69             | 0.134                          | 975.81             | 130.30             |
| A_68_P21780562 | chr2:157854036-157854080                          | NM_027434:-471           | Rprd1b        | PROMOTER               | 0.270                                                        | 0.435                          | 1452.64            | 632.44             | 0.118                          | 1121.18            | 131.91             |
| A_68_P31411656 | chr17:86007613-86007657                           | NR_038085:10102          | Six3os1       | INSIDE                 | 0.270                                                        | 0.552                          | 1036.40            | 571.73             | 0.149                          | 835.90             | 124.37             |
| A_68_P28118784 | chr11:109333745-109333789                         | NM_134038:777            | Slc16a6       | INSIDE                 | 0.270                                                        | 0.454                          | 1520.70            | 691.02             | 0.123                          | 1224.16            | 150.33             |
| A_68_P23973506 | chr5:109106670-109106714                          | NM_174870:-2024          | Slc26a1       | PROMOTER               | 0.270                                                        | 1.498                          | 4716.65            | 7067.46            | 0.405                          | 2790.84            | 1130.22            |
| A_68_P22049518 | chr3:34563441-34563498                            | NR_015580:104167         | Sox2ot        | INSIDE                 | 0.270                                                        | 0.425                          | 1444.16            | 613.38             | 0.115                          | 1024.52            | 117.35             |
| A_68_P30595258 | chr16:21947351-21947395                           | NM_025693:253            | Tmem41a       | INSIDE                 | 0.270                                                        | 0.710                          | 4519.94            | 3208.62            | 0.192                          | 3570.10            | 684.14             |
| A_68_P22878935 | chr4:44769408-44769452                            | NM_138590:0              | Zcche7        | INSIDE                 | 0.270                                                        | 0.432                          | 1307.13            | 564.76             | 0.117                          | 1023.21            | 119.21             |

| ProbeName      | Target position of probe on CpG island microarray | TargetID           | GeneSymbol    | CpG island Description | Ratio of relative methylation (TiO <sub>2</sub> -NP/Vehicle) | Sham group                     |                    |                    | TiO <sub>2</sub> -H group      |                    |                    |
|----------------|---------------------------------------------------|--------------------|---------------|------------------------|--------------------------------------------------------------|--------------------------------|--------------------|--------------------|--------------------------------|--------------------|--------------------|
|                |                                                   |                    |               |                        |                                                              | Relative methylation (Cy5/Cy3) | Cy3 signal (Input) | Cy5 signal (MeDIP) | Relative methylation (Cy5/Cy3) | Cy3 signal (Input) | Cy5 signal (MeDIP) |
| A_68_P26235836 | chr8:125299500-125299544                          | NM_144932:118      | Acsf3         | INSIDE                 | 0.269                                                        | 1.433                          | 3955.96            | 5667.01            | 0.386                          | 2719.70            | 1048.79            |
| A_68_P29223867 | chr13:93195722-93195766                           | NM_175455:-179     | Ankrd34b      | PROMOTER               | 0.269                                                        | 0.357                          | 2515.33            | 897.35             | 0.096                          | 2137.69            | 204.90             |
| A_68_P22611615 | chr3:145587665-145587709                          | NM_009740:345      | Bcl10         | INSIDE                 | 0.269                                                        | 0.620                          | 1349.91            | 837.35             | 0.167                          | 1077.79            | 179.79             |
| A_68_P23240388 | chr4:118109735-118109779                          | NM_023223:192      | Cdc20         | INSIDE                 | 0.269                                                        | 0.510                          | 5179.82            | 2642.88            | 0.137                          | 3749.47            | 514.66             |
| A_68_P21639431 | chr2:132089279-132089323                          | NM_138651:308      | Cds2          | INSIDE                 | 0.269                                                        | 0.471                          | 2740.33            | 1290.68            | 0.127                          | 2096.93            | 265.86             |
| A_68_P27913314 | chr11:72608834-72608878                           | NM_001024926:485   | Cyb5d2        | INSIDE                 | 0.269                                                        | 0.530                          | 1076.15            | 570.73             | 0.142                          | 841.16             | 119.81             |
| A_68_P23797907 | chr5:73882297-73882341                            | NM_001190733:54    | Deun1d4       | INSIDE                 | 0.269                                                        | 0.510                          | 1858.99            | 948.19             | 0.137                          | 1504.47            | 206.78             |
| A_68_P28744646 | chr12:112776044-112776088                         | NM_173363:-245     | Eif5          | PROMOTER               | 0.269                                                        | 0.663                          | 2828.18            | 1875.34            | 0.178                          | 2241.52            | 399.96             |
| A_68_P25196760 | chr7:75097984-75098028                            | NM_010513:864      | Igf1r         | INSIDE                 | 0.269                                                        | 0.593                          | 1006.02            | 596.44             | 0.160                          | 755.73             | 120.65             |
| A_68_P26885525 | chr9:121687219-121687263                          | NM_028202:516      | Kbtbd5        | INSIDE                 | 0.269                                                        | 0.493                          | 1103.61            | 543.89             | 0.133                          | 940.62             | 124.74             |
| A_68_P28099138 | chr11:105881660-105881704                         | NM_001037712:12166 | Kenh6         | INSIDE                 | 0.269                                                        | 0.698                          | 3544.63            | 2474.23            | 0.188                          | 2626.04            | 493.34             |
| A_68_P26346370 | chr9:21092650-21092694                            | NM_145416:-259     | Kri1          | PROMOTER               | 0.269                                                        | 0.549                          | 2546.79            | 1398.83            | 0.148                          | 1997.49            | 294.68             |
| A_68_P27180700 | chr10:60938374-60938418                           | NM_153542:-184     | Lrrc20        | PROMOTER               | 0.269                                                        | 0.603                          | 1258.02            | 758.07             | 0.162                          | 994.79             | 161.06             |
| A_68_P22028769 | chr3:30407354-30407398                            | NM_021442:1033     | Mecom         | INSIDE                 | 0.269                                                        | 0.736                          | 4058.31            | 2988.19            | 0.198                          | 3247.42            | 643.40             |
| A_68_P23226096 | chr4:115511583-115511632                          | NM_021461:-243     | Mknk1         | PROMOTER               | 0.269                                                        | 0.576                          | 1032.04            | 594.16             | 0.155                          | 752.72             | 116.63             |
| A_68_P24055452 | chr5:123845226-123845273                          | NM_177582:422      | Mlxip         | INSIDE                 | 0.269                                                        | 0.612                          | 1275.11            | 780.85             | 0.165                          | 976.05             | 161.01             |
| A_68_P21044522 | chr2:19293408-19293452                            | NM_029619:168      | Msrb2         | INSIDE                 | 0.269                                                        | 0.576                          | 2781.09            | 1603.02            | 0.155                          | 1989.46            | 308.99             |
| A_68_P28052172 | chr11:97560234-97560280                           | NM_001163307:442   | Pegf2         | INSIDE                 | 0.269                                                        | 0.365                          | 1830.49            | 668.55             | 0.098                          | 1345.75            | 132.28             |
| A_68_P20472798 | chr1:99666127-99666173                            | NM_173760:519      | Ppip5k2       | INSIDE                 | 0.269                                                        | 0.477                          | 1076.17            | 513.79             | 0.128                          | 923.54             | 118.59             |
| A_68_P24049493 | chr5:122735201-122735245                          | NM_177242:816      | Pptc7         | INSIDE                 | 0.269                                                        | 0.579                          | 3182.05            | 1842.25            | 0.156                          | 2339.06            | 364.23             |
| A_68_P23801766 | chr5:74590964-74591008                            | NM_026878:-364     | Ras11b        | PROMOTER               | 0.269                                                        | 0.565                          | 2245.94            | 1269.74            | 0.152                          | 1672.29            | 254.39             |
| A_68_P21636461 | chr2:131178781-131178836                          | NM_178607:-180     | Rnf24         | PROMOTER               | 0.269                                                        | 0.471                          | 1229.72            | 579.43             | 0.127                          | 936.00             | 118.59             |
| A_68_P31003193 | chr17:3114560-3114614                             | NM_134123:-385     | Scaf8         | PROMOTER               | 0.269                                                        | 0.397                          | 1860.62            | 738.51             | 0.107                          | 1441.08            | 154.09             |
| A_68_P20022048 | chr1:9289699-9289746                              | NM_027671:89       | Sntg1         | INSIDE                 | 0.269                                                        | 0.571                          | 937.05             | 534.97             | 0.154                          | 776.36             | 119.29             |
| A_68_P20616241 | chr1:133423301-133423345                          | NM_001081011:616   | Srgap2        | INSIDE                 | 0.269                                                        | 0.467                          | 1393.83            | 650.69             | 0.125                          | 1000.15            | 125.44             |
| A_68_P27943940 | chr11:78349786-78349836                           | NM_001159392:-48   | Tnfrsf1       | DIVERGENT_PROMOTER     | 0.269                                                        | 0.604                          | 1091.68            | 659.27             | 0.162                          | 739.47             | 120.15             |
| A_68_P26467466 | chr9:44215609-44215655                            | NM_021789:-1       | Trappc4       | DIVERGENT_PROMOTER     | 0.269                                                        | 0.448                          | 1284.89            | 576.13             | 0.121                          | 983.79             | 118.56             |
| A_68_P26743634 | chr9:95650227-95650271                            | NM_011643:529      | Trpc1         | INSIDE                 | 0.269                                                        | 0.644                          | 1039.10            | 669.39             | 0.173                          | 881.73             | 152.71             |
| A_68_P28057144 | chr11:98412585-98412629                           | NM_001166494:196   | Zpbp2         | INSIDE                 | 0.269                                                        | 0.457                          | 2698.52            | 1233.87            | 0.123                          | 2073.75            | 255.43             |
| A_68_P28881179 | chr13:23487667-23487711                           | BC160303:75810     |               | INSIDE                 | 0.269                                                        | 0.535                          | 2503.12            | 1338.96            | 0.144                          | 1893.59            | 272.34             |
| A_68_P24838569 | chr6:128312716-128312760                          | NR_027360:102      | 5930416119Rik | INSIDE                 | 0.268                                                        | 0.271                          | 1924.42            | 521.64             | 0.073                          | 1632.55            | 118.73             |
| A_68_P20770261 | chr1:163073112-163073156                          | NM_028664:292      | Ankrd45       | INSIDE                 | 0.268                                                        | 0.453                          | 1294.84            | 586.81             | 0.121                          | 972.84             | 118.12             |
| A_68_P25352112 | chr7:104886923-104886967                          | NM_175105:-187     | Aqp11         | PROMOTER               | 0.268                                                        | 0.580                          | 1006.01            | 583.48             | 0.155                          | 776.88             | 120.66             |
| A_68_P26797752 | chr9:105396915-105396959                          | NM_175025:511      | Atp2c1        | INSIDE                 | 0.268                                                        | 0.689                          | 1785.32            | 1230.42            | 0.184                          | 1314.36            | 242.36             |
| A_68_P28153130 | chr11:115235797-115235841                         | NM_175454:-6785    | C630004H02Rik | DIVERGENT_PROMOTER     | 0.268                                                        | 0.693                          | 1465.38            | 1015.15            | 0.185                          | 1237.82            | 229.54             |
| A_68_P21822534 | chr2:165059212-165059256                          | NM_174988:1003     | Cdh22         | INSIDE                 | 0.268                                                        | 0.628                          | 812.47             | 510.25             | 0.168                          | 716.53             | 120.62             |
| A_68_P31259432 | chr17:57130046-57130090                           | NM_017393:382      | Clpp          | INSIDE                 | 0.268                                                        | 0.612                          | 979.87             | 599.61             | 0.164                          | 764.50             | 125.31             |
| A_68_P22968884 | chr4:62876409-62876457                            | NM_025685:-13      | Col27a1       | PROMOTER               | 0.268                                                        | 0.551                          | 1119.91            | 616.53             | 0.148                          | 808.31             | 119.35             |
| A_68_P25828056 | chr8:46122297-46122344                            | NM_001081286:86759 | Fat1          | INSIDE                 | 0.268                                                        | 1.687                          | 641.92             | 1082.79            | 0.453                          | 567.83             | 257.12             |
| A_68_P28924076 | chr13:31718416-31718460                           | NM_010225:754      | Foxf2         | INSIDE                 | 0.268                                                        | 0.525                          | 1141.36            | 599.10             | 0.141                          | 950.70             | 133.64             |
| A_68_P24819105 | chr6:125115461-125115505                          | NM_008084:119      | Gapdh         | INSIDE                 | 0.268                                                        | 0.720                          | 6768.06            | 4873.16            | 0.193                          | 4535.51            | 873.94             |
| A_68_P20417066 | chr1:89223605-89223651                            | NM_001110212:25    | Gigyf2        | INSIDE                 | 0.268                                                        | 0.607                          | 1552.15            | 942.01             | 0.163                          | 1281.53            | 208.77             |
| A_68_P25766297 | chr8:33994011-33994055                            | NM_001177589:66466 | Gm3985        | DOWNSTREAM             | 0.268                                                        | 0.596                          | 969.08             | 577.10             | 0.160                          | 761.22             | 121.61             |
| A_68_P29138699 | chr13:73405898-73405942                           | NM_018885:7976     | Irx4          | INSIDE                 | 0.268                                                        | 0.514                          | 1100.44            | 565.73             | 0.138                          | 856.73             | 118.21             |
| A_68_P27543984 | chr10:128371011-128371056                         | NM_008398:165      | Irga7         | INSIDE                 | 0.268                                                        | 0.318                          | 1707.29            | 542.40             | 0.085                          | 1374.66            | 116.90             |
| A_68_P28997656 | chr13:44825977-44826021                           | NM_001205044:-144  | Jarid2        | PROMOTER               | 0.268                                                        | 0.506                          | 1762.95            | 892.14             | 0.136                          | 1405.33            | 190.89             |
| A_68_P32137138 | chr19:45298661-45298705                           | NM_010691:11044    | Lbx1          | DOWNSTREAM             | 0.268                                                        | 0.588                          | 1886.38            | 1108.70            | 0.158                          | 1325.49            | 209.14             |
| A_68_P26021275 | chr8:87229477-87229521                            | NM_008535:4143     | Lyl1          | DOWNSTREAM             | 0.268                                                        | 1.834                          | 5704.28            | 10461.67           | 0.492                          | 3414.91            | 1680.44            |
| A_68_P27282871 | chr10:79849463-79849507                           | NM_198615:912      | Mex3d         | INSIDE                 | 0.268                                                        | 0.520                          | 1423.79            | 740.17             | 0.139                          | 938.11             | 130.48             |
| A_68_P23567756 | chr5:29800752-29800798                            | NM_019944:4236     | Mnx1          | INSIDE                 | 0.268                                                        | 1.501                          | 821.61             | 1232.99            | 0.402                          | 556.60             | 223.56             |
| A_68_P21070911 | chr2:25110830-25110874                            | NM_001082476:82    | Ndor1         | INSIDE                 | 0.268                                                        | 0.703                          | 1591.65            | 1119.44            | 0.188                          | 1185.44            | 223.34             |



| ProbeName      | Target position of probe on CpG island microarray | TargetID          | GeneSymbol    | CpG island Description | Ratio of relative methylation (TiO <sub>2</sub> -NP/Vehicle) | Sham group                     |                    |                    | TiO <sub>2</sub> -H group      |                    |                    |
|----------------|---------------------------------------------------|-------------------|---------------|------------------------|--------------------------------------------------------------|--------------------------------|--------------------|--------------------|--------------------------------|--------------------|--------------------|
|                |                                                   |                   |               |                        |                                                              | Relative methylation (Cy5/Cy3) | Cy3 signal (Input) | Cy5 signal (MeDIP) | Relative methylation (Cy5/Cy3) | Cy3 signal (Input) | Cy5 signal (MeDIP) |
| A_68_P26143994 | chr8:109817474-109817518                          | NM_018823:127     | Nfat5         | INSIDE                 | 0.268                                                        | 0.602                          | 904.00             | 544.53             | 0.161                          | 757.62             | 122.26             |
| A_68_P20010813 | chr1:5906992-5907041                              | NM_010342:463     | Npbwrl        | INSIDE                 | 0.268                                                        | 0.595                          | 1239.20            | 737.49             | 0.159                          | 945.14             | 150.64             |
| A_68_P21100057 | chr2:29746300-29746344                            | NM_001177662:740  | Odf2          | INSIDE                 | 0.268                                                        | 0.593                          | 962.80             | 571.25             | 0.159                          | 767.46             | 122.15             |
| A_68_P27638869 | chr11:21896943-21896987                           | NM_011023:4690    | Otx1          | INSIDE                 | 0.268                                                        | 0.539                          | 1447.03            | 779.37             | 0.144                          | 1141.53            | 164.71             |
| A_68_P26261064 | chr8:129588848-129588893                          | NM_001122850:915  | Pard3         | INSIDE                 | 0.268                                                        | 0.728                          | 3734.54            | 2719.01            | 0.195                          | 2724.24            | 531.59             |
| A_68_P21752417 | chr2:152841063-152841107                          | NM_178939:35      | Pdrg1         | INSIDE                 | 0.268                                                        | 0.557                          | 1741.01            | 969.95             | 0.149                          | 1317.68            | 196.70             |
| A_68_P32117863 | chr19:41986389-41986433                           | NM_023418:50      | Pgam1         | INSIDE                 | 0.268                                                        | 0.485                          | 2687.15            | 1302.79            | 0.130                          | 2042.45            | 265.75             |
| A_68_P20722065 | chr1:154472108-154472163                          | NM_016846:106     | Rgl1          | INSIDE                 | 0.268                                                        | 0.398                          | 1496.32            | 596.14             | 0.107                          | 1195.18            | 127.54             |
| A_68_P30572559 | chr16:17210640-17210686                           | NM_001033338:2435 | Rimbp3        | INSIDE                 | 0.268                                                        | 0.627                          | 1739.47            | 1091.01            | 0.168                          | 1341.45            | 225.66             |
| A_68_P24763849 | chr6:114081414-114081459                          | NM_172890:202     | Slc6a11       | INSIDE                 | 0.268                                                        | 0.444                          | 2197.67            | 974.80             | 0.119                          | 1641.03            | 195.42             |
| A_68_P27844725 | chr11:60591042-60591086                           | NM_175491:38      | Smerc8        | INSIDE                 | 0.268                                                        | 0.531                          | 1262.52            | 670.68             | 0.143                          | 1045.08            | 148.93             |
| A_68_P29937474 | chr14:118634627-118634671                         | NM_177753:1604    | Sox21         | INSIDE                 | 0.268                                                        | 0.593                          | 905.42             | 536.49             | 0.159                          | 755.00             | 119.69             |
| A_68_P30381700 | chr15:81977560-81977604                           | NM_033218:-116    | Sreb12        | PROMOTER               | 0.268                                                        | 0.552                          | 1464.31            | 808.90             | 0.148                          | 1024.78            | 151.75             |
| A_68_P24760939 | chr6:113646833-113646877                          | NM_001033463:-638 | Tatdn2        | PROMOTER               | 0.268                                                        | 0.607                          | 1884.49            | 1144.62            | 0.163                          | 1714.85            | 278.69             |
| A_68_P26239532 | chr8:125898381-125898425                          | NM_001037877:668  | Tcf25         | INSIDE                 | 0.268                                                        | 2.679                          | 2303.14            | 6169.57            | 0.719                          | 1727.72            | 1241.70            |
| A_68_P24593530 | chr6:83391357-83391401                            | NM_183138:294     | Tet3          | INSIDE                 | 0.268                                                        | 0.553                          | 2332.34            | 1290.74            | 0.148                          | 1475.98            | 218.98             |
| A_68_P27752129 | chr11:43561327-43561371                           | NM_133795:127     | Tte1          | INSIDE                 | 0.268                                                        | 0.579                          | 1558.11            | 901.90             | 0.155                          | 1154.64            | 179.09             |
| A_68_P28712490 | chr12:107248322-107248369                         | NM_001029843:-127 | Vrk1          | PROMOTER               | 0.268                                                        | 0.492                          | 1236.22            | 608.73             | 0.132                          | 913.09             | 120.62             |
| A_68_P21085075 | chr2:27370596-27370640                            | NM_080848:-48     | Wdr5          | PROMOTER               | 0.268                                                        | 0.704                          | 5083.37            | 3577.92            | 0.189                          | 3778.18            | 712.26             |
| A_68_P22887518 | chr4:46209177-46209222                            | NM_011728:-16     | Xpa           | PROMOTER               | 0.268                                                        | 0.601                          | 882.51             | 530.59             | 0.161                          | 745.71             | 120.32             |
| A_68_P24376841 | chr6:38304658-38304702                            | NM_028421:-77     | Zc3hav1       | PROMOTER               | 0.268                                                        | 0.419                          | 1499.53            | 628.88             | 0.112                          | 1192.29            | 134.02             |
| A_68_P30506931 | chr16:3872466-3872510                             | NM_001033159:-114 | Zfp597        | PROMOTER               | 0.268                                                        | 0.594                          | 2790.27            | 1656.08            | 0.159                          | 2087.26            | 331.93             |
| A_68_P27781838 | chr11:49016880-49016924                           | NM_001024846:-99  | Zfp62         | PROMOTER               | 0.268                                                        | 0.682                          | 4759.34            | 3244.03            | 0.182                          | 3846.82            | 701.43             |
| A_68_P26822981 | chr9:110207579-110207626                          | NM_001081381:-93  | 2610002117Rik | PROMOTER               | 0.267                                                        | 0.433                          | 1295.83            | 560.67             | 0.116                          | 1015.06            | 117.37             |
| A_68_P26039918 | chr8:90796247-90796291                            | NM_007406:-33     | Adey7         | PROMOTER               | 0.267                                                        | 0.574                          | 965.93             | 554.35             | 0.153                          | 780.81             | 119.53             |
| A_68_P28175453 | chr11:118902817-118902861                         | NM_013926:-611    | Cbx8          | PROMOTER               | 0.267                                                        | 0.668                          | 5932.39            | 3962.21            | 0.178                          | 4121.47            | 734.38             |
| A_68_P23601183 | chr5:35868307-35868351                            | NM_153107:-53     | Cpz           | PROMOTER               | 0.267                                                        | 0.577                          | 2645.43            | 1527.42            | 0.154                          | 1994.43            | 307.66             |
| A_68_P31758331 | chr18:61715432-61715480                           | NM_146087:221     | Cank1a1       | INSIDE                 | 0.267                                                        | 0.536                          | 1117.18            | 599.06             | 0.143                          | 843.72             | 120.88             |
| A_68_P22941963 | chr4:56877865-56877909                            | NM_018761:197     | Cttnal1       | INSIDE                 | 0.267                                                        | 0.673                          | 3539.80            | 2381.13            | 0.180                          | 2605.56            | 468.37             |
| A_68_P21360374 | chr2:77783936-77783980                            | NM_030560:452     | Cwc22         | INSIDE                 | 0.267                                                        | 0.466                          | 2112.35            | 983.94             | 0.125                          | 1760.28            | 219.18             |
| A_68_P28100235 | chr11:106078135-106078182                         | NM_028074:-81     | Ddx42         | DIVERGENT_PROMOTER     | 0.267                                                        | 0.488                          | 1267.69            | 618.10             | 0.130                          | 900.17             | 117.27             |
| A_68_P23226777 | chr4:115609072-115609120                          | NM_001025567:3435 | Dmbx1         | INSIDE                 | 0.267                                                        | 0.588                          | 1195.49            | 702.94             | 0.157                          | 928.86             | 145.93             |
| A_68_P27826023 | chr11:57331958-57332002                           | NM_001168667:166  | Fam114a2      | INSIDE                 | 0.267                                                        | 0.523                          | 3648.60            | 1906.86            | 0.140                          | 2548.04            | 355.69             |
| A_68_P27357059 | chr10:93498957-93499001                           | NM_053072:233     | Fgd6          | INSIDE                 | 0.267                                                        | 0.491                          | 1250.55            | 613.55             | 0.131                          | 900.05             | 117.91             |
| A_68_P21283785 | chr2:64860691-64860735                            | NM_016719:111     | Grb14         | INSIDE                 | 0.267                                                        | 0.583                          | 1408.09            | 820.40             | 0.156                          | 1085.28            | 168.77             |
| A_68_P23592734 | chr5:34511815-34511865                            | NM_146159:233     | Haus3         | INSIDE                 | 0.267                                                        | 0.517                          | 1113.92            | 576.21             | 0.138                          | 872.87             | 120.52             |
| A_68_P23231911 | chr4:116668335-116668379                          | NM_175244:404     | Hectd3        | INSIDE                 | 0.267                                                        | 0.459                          | 1858.83            | 853.81             | 0.123                          | 1602.86            | 196.92             |
| A_68_P27495358 | chr10:119549908-119549958                         | NM_080446:89      | Helb          | INSIDE                 | 0.267                                                        | 0.615                          | 969.27             | 596.28             | 0.164                          | 731.87             | 120.14             |
| A_68_P29613103 | chr14:55196489-55196533                           | NM_010590:-12     | Jub           | PROMOTER               | 0.267                                                        | 0.694                          | 1422.73            | 986.66             | 0.185                          | 1056.41            | 195.74             |
| A_68_P31158189 | chr17:35332625-35332669                           | NM_008518:1195    | Ltb           | INSIDE                 | 0.267                                                        | 0.396                          | 1615.19            | 639.59             | 0.106                          | 1192.92            | 126.15             |
| A_68_P20551221 | chr1:120218602-120218646                          | NM_026472:205     | Mki67ip       | INSIDE                 | 0.267                                                        | 0.557                          | 987.20             | 550.06             | 0.149                          | 789.50             | 117.28             |
| A_68_P25948618 | chr8:72426813-72426857                            | NM_023312:-377    | Ndufa13       | PROMOTER               | 0.267                                                        | 0.444                          | 2442.87            | 1083.58            | 0.118                          | 1777.55            | 210.55             |
| A_68_P23362017 | chr4:140634100-140634144                          | NM_025383:138     | Necap2        | INSIDE                 | 0.267                                                        | 0.685                          | 1299.10            | 890.49             | 0.183                          | 962.95             | 176.55             |
| A_68_P29288685 | chr13:104899639-104899683                         | NM_029447:34      | Nln           | INSIDE                 | 0.267                                                        | 0.502                          | 3750.88            | 1882.96            | 0.134                          | 2717.95            | 364.88             |
| A_68_P25377673 | chr7:109358261-109358306                          | NM_022979:351     | Nup98         | INSIDE                 | 0.267                                                        | 0.374                          | 1583.05            | 591.34             | 0.100                          | 1224.31            | 121.96             |
| A_68_P22484166 | chr3:122432487-122432536                          | NM_153422:436     | Pde5a         | INSIDE                 | 0.267                                                        | 0.522                          | 1141.46            | 595.92             | 0.140                          | 846.25             | 118.12             |
| A_68_P28941006 | chr13:34967366-34967410                           | NM_013830:26      | Prpf4b        | INSIDE                 | 0.267                                                        | 0.446                          | 1303.47            | 581.96             | 0.119                          | 1031.54            | 123.01             |
| A_68_P24980579 | chr7:16858527-16858571                            | NM_001136270:493  | Prn24         | INSIDE                 | 0.267                                                        | 0.639                          | 11345.83           | 7252.67            | 0.171                          | 7850.37            | 1341.64            |
| A_68_P20788006 | chr1:166178784-166178828                          | NM_054087:-379    | Slc19a2       | PROMOTER               | 0.267                                                        | 0.630                          | 1163.80            | 733.02             | 0.168                          | 891.55             | 150.13             |
| A_68_P32240693 | chrX:7461619-7461664                              | NM_001083937:272  | Slc35a2       | INSIDE                 | 0.267                                                        | 1.363                          | 1457.12            | 1985.99            | 0.365                          | 620.73             | 226.31             |
| A_68_P21394884 | chr2:84679887-84679931                            | NM_024497:-571    | Slc43a1       | PROMOTER               | 0.267                                                        | 0.395                          | 1482.17            | 585.71             | 0.105                          | 1143.40            | 120.42             |

| ProbeName      | Target position of probe on CpG island microarray | TargetID                | GeneSymbol    | CpG island Description | Ratio of relative methylation (TiO <sub>2</sub> -NP/Vehicle) | Sham group                     |                    |                    | TiO <sub>2</sub> -H group      |                    |                    |
|----------------|---------------------------------------------------|-------------------------|---------------|------------------------|--------------------------------------------------------------|--------------------------------|--------------------|--------------------|--------------------------------|--------------------|--------------------|
|                |                                                   |                         |               |                        |                                                              | Relative methylation (Cy5/Cy3) | Cy3 signal (Input) | Cy5 signal (MeDIP) | Relative methylation (Cy5/Cy3) | Cy3 signal (Input) | Cy5 signal (MeDIP) |
| A_68_P20024912 | chr1:9934064-9934108                              | NR_004410:-1462         | Snord87       | PROMOTER               | 0.267                                                        | 0.519                          | 3610.77            | 1875.67            | 0.139                          | 2681.81            | 371.53             |
| A_68_P2855634  | chr12:77811742-77811790                           | NM_013675:-232          | Snpb1         | PROMOTER               | 0.267                                                        | 0.632                          | 901.05             | 569.83             | 0.169                          | 716.22             | 121.15             |
| A_68_P30296506 | chr15:67007655-67007699                           | NM_009177:768           | St3gal1       | INSIDE                 | 0.267                                                        | 0.461                          | 1360.77            | 627.89             | 0.123                          | 996.11             | 122.60             |
| A_68_P32143397 | chr19:46423267-46423311                           | NM_029186:-8081         | Tmem180       | PROMOTER               | 0.267                                                        | 0.449                          | 1558.92            | 699.81             | 0.120                          | 1280.80            | 153.60             |
| A_68_P27975818 | chr11:83992769-83992817                           | ENSMUST00000136463:-520 |               | PROMOTER               | 0.267                                                        | 0.456                          | 1222.65            | 557.05             | 0.121                          | 963.12             | 117.01             |
| A_68_P27851351 | chr11:61770416-61770460                           | ENSMUST00000136971:127  |               | INSIDE                 | 0.267                                                        | 0.548                          | 950.77             | 520.75             | 0.146                          | 830.11             | 121.23             |
| A_68_P31465577 | chr18:4921962-4922006                             | ENSMUST00000143254:261  |               | INSIDE                 | 0.267                                                        | 0.674                          | 1446.30            | 974.33             | 0.180                          | 1089.49            | 196.12             |
| A_68_P24325500 | chr6:29222845-29222889                            | NM_023516:241           | 2310016C08Rik | INSIDE                 | 0.266                                                        | 0.519                          | 1763.29            | 915.53             | 0.138                          | 1391.52            | 191.86             |
| A_68_P21418961 | chr2:90623244-90623288                            | NM_178755:366           | Agbl2         | INSIDE                 | 0.266                                                        | 0.655                          | 832.57             | 545.04             | 0.174                          | 673.62             | 117.42             |
| A_68_P27970639 | chr11:83116144-83116188                           | NM_001035854:-32        | Ap2b1         | DIVERGENT_PROMOTER     | 0.266                                                        | 0.337                          | 1694.36            | 570.46             | 0.090                          | 1348.12            | 120.78             |
| A_68_P24050077 | chr5:122841748-122841803                          | NM_019824:-161          | Arpc3         | PROMOTER               | 0.266                                                        | 0.480                          | 1637.78            | 786.52             | 0.128                          | 1173.02            | 150.12             |
| A_68_P22128529 | chr3:51028612-51028656                            | NM_009834:266           | Cern4l        | INSIDE                 | 0.266                                                        | 0.692                          | 4112.17            | 2845.24            | 0.184                          | 3149.48            | 578.75             |
| A_68_P29177663 | chr13:81922129-81922187                           | NM_007684:-132          | Cetn3         | PROMOTER               | 0.266                                                        | 0.526                          | 1070.28            | 563.33             | 0.140                          | 883.45             | 123.60             |
| A_68_P26042572 | chr8:91221405-91221449                            | NM_001128169:484        | Cyld          | INSIDE                 | 0.266                                                        | 0.527                          | 1386.38            | 730.10             | 0.140                          | 990.49             | 138.50             |
| A_68_P21957442 | chr3:14578468-14578519                            | NM_007892:-177          | E2f5          | PROMOTER               | 0.266                                                        | 0.464                          | 1625.94            | 754.46             | 0.123                          | 1380.23            | 170.26             |
| A_68_P28947128 | chr13:36209814-36209858                           | NM_001039189:557        | Fars2         | INSIDE                 | 0.266                                                        | 0.634                          | 945.14             | 599.59             | 0.169                          | 815.97             | 137.83             |
| A_68_P28067617 | chr11:100217870-100217915                         | NM_010404:-437          | Hap1          | PROMOTER               | 0.266                                                        | 0.581                          | 1057.03            | 614.11             | 0.155                          | 816.69             | 126.42             |
| A_68_P30566358 | chr16:15637618-15637664                           | NM_008565:-147          | Mcm4          | DIVERGENT_PROMOTER     | 0.266                                                        | 0.442                          | 1217.32            | 537.50             | 0.118                          | 991.35             | 116.59             |
| A_68_P26204801 | chr8:120326174-120326218                          | NM_026758:-367          | Mphosph6      | PROMOTER               | 0.266                                                        | 0.505                          | 1151.05            | 581.37             | 0.135                          | 911.11             | 122.60             |
| A_68_P22278908 | chr3:82162460-82162514                            | NM_001081230:493        | Mtap9         | INSIDE                 | 0.266                                                        | 0.442                          | 1225.07            | 541.92             | 0.118                          | 993.17             | 117.05             |
| A_68_P20648914 | chr1:138845211-138845255                          | NM_001159769:4975       | Nr5a2         | INSIDE                 | 0.266                                                        | 0.467                          | 1245.99            | 581.75             | 0.124                          | 956.08             | 118.87             |
| A_68_P21839348 | chr2:167905989-167906034                          | NM_021409:-492          | Pard6b        | PROMOTER               | 0.266                                                        | 0.582                          | 2128.01            | 1238.18            | 0.155                          | 1636.37            | 253.01             |
| A_68_P25957709 | chr8:74120139-74120192                            | NM_025396:4083          | Pgls          | INSIDE                 | 0.266                                                        | 0.620                          | 1070.78            | 664.12             | 0.165                          | 861.19             | 142.27             |
| A_68_P26079860 | chr8:97381962-97382011                            | NM_009090:637           | Poir2c        | INSIDE                 | 0.266                                                        | 0.467                          | 1201.30            | 560.87             | 0.124                          | 927.62             | 115.20             |
| A_68_P29568499 | chr14:45609164-45609208                           | NM_008964:1401          | Ptger2        | INSIDE                 | 0.266                                                        | 0.518                          | 1160.21            | 601.11             | 0.138                          | 859.22             | 118.22             |
| A_68_P26805684 | chr9:106788066-106788110                          | NM_175402:1243          | Rbm15b        | INSIDE                 | 0.266                                                        | 0.639                          | 849.13             | 542.77             | 0.170                          | 678.03             | 115.28             |
| A_68_P29982088 | chr15:5066265-5066309                             | NM_026069:-326          | Rpl37         | DIVERGENT_PROMOTER     | 0.266                                                        | 0.347                          | 1734.07            | 602.29             | 0.092                          | 1268.43            | 117.01             |
| A_68_P30351093 | chr15:76734840-76734884                           | NM_012053:362           | Rpl8          | INSIDE                 | 0.266                                                        | 0.623                          | 1058.14            | 658.88             | 0.166                          | 738.40             | 122.43             |
| A_68_P20149048 | chr1:36614178-36614222                            | NM_001126047:1026       | Sema4c        | INSIDE                 | 0.266                                                        | 0.466                          | 1230.25            | 573.10             | 0.124                          | 939.14             | 116.27             |
| A_68_P26995733 | chr10:21602269-21602313                           | NM_001161845:301        | Sgk1          | INSIDE                 | 0.266                                                        | 0.534                          | 1247.06            | 666.50             | 0.142                          | 1019.87            | 144.79             |
| A_68_P21585949 | chr2:122174591-122174635                          | NM_001013829:20042      | Shf           | DOWNSTREAM             | 0.266                                                        | 0.532                          | 1138.26            | 605.30             | 0.142                          | 932.96             | 132.20             |
| A_68_P23576445 | chr5:31395426-31395470                            | NM_011773:452           | Slc30a3       | INSIDE                 | 0.266                                                        | 0.622                          | 5256.90            | 3269.71            | 0.165                          | 3941.63            | 652.25             |
| A_68_P28466194 | chr12:59314126-59314170                           | NM_009216:1358          | Sstr1         | INSIDE                 | 0.266                                                        | 0.523                          | 1498.91            | 784.15             | 0.139                          | 1114.45            | 155.35             |
| A_68_P24922452 | chr6:145289388-145289432                          |                         |               | Unknown                | 0.266                                                        | 0.684                          | 1504.75            | 1028.72            | 0.182                          | 1161.11            | 211.37             |
| A_68_P23186776 | chr4:106511986-106512035                          | ENSMUST00000151369:8515 |               | DOWNSTREAM             | 0.266                                                        | 0.539                          | 1024.40            | 551.99             | 0.143                          | 830.66             | 118.97             |
| A_68_P24124950 | chr5:137730313-137730357                          | NM_009599:830           | Ache          | INSIDE                 | 0.265                                                        | 0.678                          | 2136.29            | 1447.55            | 0.179                          | 1641.91            | 294.45             |
| A_68_P21441211 | chr2:94277500-94277544                            | NM_007466:782           | Api5          | INSIDE                 | 0.265                                                        | 0.417                          | 1244.17            | 518.83             | 0.111                          | 1103.43            | 121.96             |
| A_68_P27900650 | chr11:70245838-70245882                           | NM_145429:-294          | Arrb2         | PROMOTER               | 0.265                                                        | 0.590                          | 1112.28            | 656.73             | 0.156                          | 1005.28            | 157.11             |
| A_68_P27291405 | chr10:81590620-81590664                           | NM_001163064:-115       | AU041133      | PROMOTER               | 0.265                                                        | 0.641                          | 887.31             | 568.78             | 0.170                          | 709.54             | 120.48             |
| A_68_P23295722 | chr4:128916103-128916147                          | C77080                  |               | INSIDE                 | 0.265                                                        | 0.521                          | 2413.50            | 1257.67            | 0.138                          | 1941.47            | 268.53             |
| A_68_P31140913 | chr17:31773722-31773766                           | NM_178224:332           | Cbs           | INSIDE                 | 0.265                                                        | 0.493                          | 1674.74            | 825.27             | 0.130                          | 1345.15            | 175.42             |
| A_68_P26236513 | chr8:125394326-125394370                          | NM_007662:22075         | Cdh15         | DOWNSTREAM             | 0.265                                                        | 1.798                          | 1979.57            | 3559.51            | 0.477                          | 1523.30            | 726.93             |
| A_68_P27898423 | chr11:69814128-69814172                           | NM_007888:23            | Dvl2          | INSIDE                 | 0.265                                                        | 0.528                          | 2671.78            | 1409.79            | 0.140                          | 1863.09            | 260.61             |
| A_68_P25582341 | chr7:147302455-147302502                          | NM_053119:-156          | Echs1         | DIVERGENT_PROMOTER     | 0.265                                                        | 0.562                          | 1003.74            | 563.95             | 0.149                          | 816.93             | 121.63             |
| A_68_P22729554 | chr4:11314649-11314704                            | NM_194055:-746          | Esrp1         | PROMOTER               | 0.265                                                        | 0.627                          | 1378.65            | 864.11             | 0.166                          | 1081.67            | 179.97             |
| A_68_P31427927 | chr17:88841025-88841069                           | NM_180974:995           | Foxn2         | INSIDE                 | 0.265                                                        | 0.520                          | 3096.73            | 1609.43            | 0.138                          | 2419.52            | 332.78             |
| A_68_P22448216 | chr3:115955553-115955597                          | NM_022427:828           | Gpr88         | INSIDE                 | 0.265                                                        | 0.697                          | 1122.37            | 782.55             | 0.184                          | 889.23             | 164.02             |
| A_68_P25095368 | chr7:53086086-53086130                            | NM_153419:51            | Grwd1         | INSIDE                 | 0.265                                                        | 0.603                          | 866.65             | 522.86             | 0.160                          | 750.00             | 119.92             |
| A_68_P23596023 | chr5:35104298-35104342                            | NM_010414:-68           | Htt           | PROMOTER               | 0.265                                                        | 0.687                          | 1410.34            | 968.64             | 0.182                          | 1169.35            | 212.81             |
| A_68_P25596366 | chr7:149846243-149846296                          | NM_001122736:671        | Igf2          | INSIDE                 | 0.265                                                        | 0.565                          | 1149.75            | 649.23             | 0.150                          | 816.65             | 122.26             |
| A_68_P32137135 | chr19:45298271-45298326                           | NM_010691:11428         | Lbx1          | DOWNSTREAM             | 0.265                                                        | 0.492                          | 1426.47            | 701.76             | 0.130                          | 962.12             | 125.49             |

| ProbeName      | Target position of probe on CpG island microarray | TargetID                | GeneSymbol    | CpG island Description | Ratio of relative methylation (TiO <sub>2</sub> -NP/Vehicle) | Sham group                     |                    |                    | TiO <sub>2</sub> -H group      |                    |                    |
|----------------|---------------------------------------------------|-------------------------|---------------|------------------------|--------------------------------------------------------------|--------------------------------|--------------------|--------------------|--------------------------------|--------------------|--------------------|
|                |                                                   |                         |               |                        |                                                              | Relative methylation (Cy5/Cy3) | Cy3 signal (Input) | Cy5 signal (MeDIP) | Relative methylation (Cy5/Cy3) | Cy3 signal (Input) | Cy5 signal (MeDIP) |
| A_68_P26227607 | chr8:124109628-124109679                          | NM_026160:-4714         | Map11c3b      | DIVERGENT_PROMOTER     | 0.265                                                        | 0.620                          | 943.16             | 584.78             | 0.164                          | 724.21             | 118.92             |
| A_68_P24623657 | chr6:88674155-88674204                            | NM_001166249:-226       | Mgll1         | PROMOTER               | 0.265                                                        | 0.615                          | 910.30             | 559.40             | 0.163                          | 745.81             | 121.25             |
| A_68_P27924623 | chr11:74986635-74986679                           | NR_029794:-233          | Mir212        | DIVERGENT_PROMOTER     | 0.265                                                        | 0.611                          | 1122.06            | 685.33             | 0.162                          | 738.36             | 119.43             |
| A_68_P27922753 | chr11:74651662-74651706                           | NM_010813:7259          | Mnt           | INSIDE                 | 0.265                                                        | 0.537                          | 1150.75            | 617.92             | 0.142                          | 851.75             | 121.25             |
| A_68_P24009559 | chr5:115886650-115886694                          | NM_008629:6979          | Msi1          | INSIDE                 | 0.265                                                        | 0.634                          | 963.95             | 611.18             | 0.168                          | 745.10             | 125.39             |
| A_68_P24140929 | chr5:140808002-140808046                          | NM_008637:149           | Nudt1         | INSIDE                 | 0.265                                                        | 1.402                          | 1716.18            | 2405.38            | 0.371                          | 1358.22            | 504.11             |
| A_68_P22518619 | chr3:128902745-128902789                          | NM_011098:-69           | Pitx2         | PROMOTER               | 0.265                                                        | 0.629                          | 896.46             | 563.85             | 0.167                          | 737.64             | 122.95             |
| A_68_P20412581 | chr1:88421464-88421508                            | NM_008972:-1824         | Ptma          | PROMOTER               | 0.265                                                        | 0.557                          | 1663.73            | 927.10             | 0.148                          | 1350.33            | 199.57             |
| A_68_P28071212 | chr11:100830764-100830808                         | NM_008986:1145          | Ptfr          | INSIDE                 | 0.265                                                        | 1.721                          | 8144.08            | 14014.31           | 0.457                          | 5451.22            | 2490.51            |
| A_68_P27840876 | chr11:59928639-59928683                           | NM_009021:10146         | Rai1          | INSIDE                 | 0.265                                                        | 0.523                          | 2954.70            | 1544.03            | 0.138                          | 2300.34            | 318.32             |
| A_68_P30118694 | chr15:32175744-32175788                           | NM_009154:1199          | Sema5a        | INSIDE                 | 0.265                                                        | 0.377                          | 1639.40            | 618.15             | 0.100                          | 1315.41            | 131.64             |
| A_68_P24328153 | chr6:29686461-29686505                            | NM_176996:986           | Smo           | INSIDE                 | 0.265                                                        | 0.565                          | 1568.63            | 886.99             | 0.150                          | 1095.05            | 163.87             |
| A_68_P25840861 | chr8:48373757-48373801                            | NM_001114311:978        | Stox2         | INSIDE                 | 0.265                                                        | 0.530                          | 3849.13            | 2041.53            | 0.141                          | 3167.91            | 445.20             |
| A_68_P24521962 | chr6:67485386-67485430                            | NM_020047:408           | Tacstd2       | INSIDE                 | 0.265                                                        | 0.563                          | 1048.17            | 590.62             | 0.150                          | 817.80             | 122.34             |
| A_68_P29141046 | chr13:73764254-73764302                           | NM_009354:-170          | Tert          | PROMOTER               | 0.265                                                        | 1.714                          | 4654.65            | 7976.14            | 0.454                          | 2975.72            | 1350.69            |
| A_68_P28170438 | chr11:118151273-118151317                         | NM_001033528:264        | Usp36         | INSIDE                 | 0.265                                                        | 0.690                          | 2983.32            | 2058.58            | 0.183                          | 2067.49            | 377.70             |
| A_68_P22963157 | chr4:61869358-61869402                            | NM_009554:200           | Zfp37         | INSIDE                 | 0.265                                                        | 0.617                          | 3214.07            | 1982.33            | 0.164                          | 2353.55            | 384.85             |
| A_68_P21426310 | chr2:91900168-91900212                            | ENSMUST00000123840:-664 |               | PROMOTER               | 0.265                                                        | 0.430                          | 2329.08            | 1002.63            | 0.114                          | 1692.53            | 193.34             |
| A_68_P27298723 | chr10:83185538-83185582                           | NM_001145198:-49        | 1500009L16Rik | PROMOTER               | 0.264                                                        | 0.633                          | 3031.30            | 1917.79            | 0.167                          | 2286.84            | 382.04             |
| A_68_P20352243 | chr1:75138899-75138957                            | NM_026977:14            | 1810031K17Rik | INSIDE                 | 0.264                                                        | 0.622                          | 1005.25            | 625.04             | 0.164                          | 715.96             | 117.57             |
| A_68_P23601495 | chr5:35917857-35917901                            | NM_030208:-159          | 2310079F23Rik | DIVERGENT_PROMOTER     | 0.264                                                        | 0.467                          | 1151.30            | 537.11             | 0.123                          | 955.93             | 117.62             |
| A_68_P21052780 | chr2:20889683-20889727                            | NM_001081364:-356       | Arhgap21      | DIVERGENT_PROMOTER     | 0.264                                                        | 0.377                          | 1771.21            | 667.53             | 0.099                          | 1252.59            | 124.43             |
| A_68_P28788962 | chr13:3610060-3610104                             | NM_134063:272           | BC016423      | INSIDE                 | 0.264                                                        | 0.552                          | 1324.53            | 730.87             | 0.146                          | 1111.58            | 161.92             |
| A_68_P31100996 | chr17:25150700-25150744                           | NM_020608:1453          | Cramp11       | INSIDE                 | 0.264                                                        | 0.505                          | 1505.33            | 760.87             | 0.133                          | 1172.77            | 156.40             |
| A_68_P26016155 | chr8:86239004-86239050                            | NM_197982:-49           | Ddx39         | PROMOTER               | 0.264                                                        | 0.436                          | 1335.39            | 582.13             | 0.115                          | 1047.94            | 120.51             |
| A_68_P28075719 | chr11:101646593-101646637                         | NM_008815:10            | Etv4          | INSIDE                 | 0.264                                                        | 0.387                          | 1398.33            | 541.09             | 0.102                          | 1162.02            | 118.63             |
| A_68_P32023816 | chr19:24551478-24551522                           | NM_026520:464           | Fam122a       | INSIDE                 | 0.264                                                        | 0.556                          | 1049.22            | 583.33             | 0.147                          | 820.35             | 120.62             |
| A_68_P27800935 | chr11:52578820-52578864                           | NM_177059:635           | Fstl4         | INSIDE                 | 0.264                                                        | 0.604                          | 2257.04            | 1363.23            | 0.159                          | 1817.90            | 289.88             |
| A_68_P26200994 | chr8:119681587-119681631                          | NM_001081151:-426       | Gan           | PROMOTER               | 0.264                                                        | 0.514                          | 1034.07            | 531.36             | 0.136                          | 861.90             | 117.07             |
| A_68_P29248565 | chr13:97695108-97695152                           | NM_001166065:487        | Gent4         | INSIDE                 | 0.264                                                        | 0.497                          | 2107.56            | 1047.39            | 0.131                          | 1876.41            | 246.08             |
| A_68_P31150611 | chr17:33955093-33955137                           | NM_030697:7647          | Kank3         | INSIDE                 | 0.264                                                        | 0.566                          | 1159.37            | 656.27             | 0.149                          | 953.33             | 142.35             |
| A_68_P30366911 | chr15:79342352-79342396                           | NM_134090:-4463         | Kdelr3        | DIVERGENT_PROMOTER     | 0.264                                                        | 0.657                          | 3541.10            | 2327.67            | 0.173                          | 2854.17            | 494.60             |
| A_68_P27534886 | chr10:126699975-126700019                         | NM_001039000:423        | Kif5a         | INSIDE                 | 0.264                                                        | 0.532                          | 1181.40            | 628.45             | 0.140                          | 850.79             | 119.49             |
| A_68_P22934424 | chr4:55544128-55544172                            | NM_010637:1197          | Klfl4         | INSIDE                 | 0.264                                                        | 0.534                          | 1468.63            | 784.65             | 0.141                          | 1321.60            | 186.61             |
| A_68_P20739604 | chr1:157588731-157588781                          | NM_010712:401           | Lhx4          | INSIDE                 | 0.264                                                        | 0.577                          | 1144.34            | 660.76             | 0.152                          | 772.62             | 117.78             |
| A_68_P24655997 | chr6:94232874-94232918                            | NM_001029850:1002       | Magi1         | INSIDE                 | 0.264                                                        | 0.504                          | 1466.14            | 739.50             | 0.133                          | 1225.95            | 163.36             |
| A_68_P22218630 | chr3:68809433-68809477                            | NR_029529:-4239         | Mir15b        | PROMOTER               | 0.264                                                        | 0.567                          | 1025.55            | 580.98             | 0.150                          | 802.95             | 120.16             |
| A_68_P26716011 | chr9:90009342-90009386                            | NM_001039147:294        | Morf4l1       | INSIDE                 | 0.264                                                        | 1.700                          | 6468.15            | 10998.33           | 0.448                          | 4107.86            | 1841.19            |
| A_68_P29139136 | chr13:73466105-73466159                           | NM_010888:-202          | Ndufs6        | DIVERGENT_PROMOTER     | 0.264                                                        | 0.636                          | 1318.25            | 838.33             | 0.168                          | 1001.16            | 168.12             |
| A_68_P24981708 | chr7:17061429-17061473                            | NM_00104291:7061473     | Npas1         | INSIDE                 | 0.264                                                        | 0.541                          | 1054.92            | 570.50             | 0.143                          | 813.15             | 116.19             |
| A_68_P28600138 | chr12:86114028-86114072                           | NM_023409:12            | Npc2          | INSIDE                 | 0.264                                                        | 0.361                          | 2097.68            | 758.08             | 0.096                          | 1556.27            | 148.71             |
| A_68_P24192245 | chr5:151476526-151476570                          | NM_175310:147           | Pds5b         | INSIDE                 | 0.264                                                        | 0.473                          | 2267.39            | 1073.05            | 0.125                          | 1818.86            | 227.40             |
| A_68_P27900566 | chr11:70223756-70223800                           | NM_029231:-245          | Pelp1         | PROMOTER               | 0.264                                                        | 0.691                          | 2541.05            | 1756.22            | 0.183                          | 1812.48            | 330.89             |
| A_68_P22778417 | chr4:22404692-22404736                            | NM_008899:10564         | Pou3f2        | DOWNSTREAM             | 0.264                                                        | 0.510                          | 1777.13            | 906.10             | 0.135                          | 1488.14            | 200.52             |
| A_68_P32322125 | chrX:34731608-34731653                            | NM_153503:293           | Rnf113a1      | INSIDE                 | 0.264                                                        | 1.436                          | 1448.26            | 2079.46            | 0.379                          | 565.57             | 214.43             |
| A_68_P21747623 | chr2:151921158-151921202                          | NM_001160410:13916      | Sert2         | INSIDE                 | 0.264                                                        | 1.355                          | 2032.50            | 2753.88            | 0.358                          | 1383.66            | 495.61             |
| A_68_P20005842 | chr1:4487520-4487564                              | NM_011441:-1048         | Sox17         | PROMOTER               | 0.264                                                        | 0.628                          | 2618.18            | 1643.63            | 0.166                          | 1927.02            | 319.87             |
| A_68_P28615265 | chr12:88640437-88640481                           | NM_011479:88722         | Sptlc2        | DOWNSTREAM             | 0.264                                                        | 0.635                          | 3336.21            | 2118.25            | 0.167                          | 2605.01            | 436.06             |
| A_68_P31415000 | chr17:86544304-86544360                           | NM_030133:183           | Srbd1         | INSIDE                 | 0.264                                                        | 0.612                          | 954.25             | 583.60             | 0.162                          | 748.11             | 120.92             |
| A_68_P31209391 | chr17:47027623-47027667                           | NM_178385:75            | Tbec          | INSIDE                 | 0.264                                                        | 0.514                          | 1767.64            | 909.38             | 0.136                          | 1393.69            | 189.26             |
| A_68_P27044452 | chr10:31165585-31165629                           | NM_009413:121           | Tpd5211       | INSIDE                 | 0.264                                                        | 0.445                          | 1375.58            | 611.90             | 0.118                          | 1068.33            | 125.54             |

| ProbeName      | Target position of probe on CpG island microarray | TargetID          | GeneSymbol    | CpG island Description | Ratio of relative methylation (TiO <sub>2</sub> -NP/Vehicle) | Sham group                     |                    |                    | TiO <sub>2</sub> -H group      |                    |                    |
|----------------|---------------------------------------------------|-------------------|---------------|------------------------|--------------------------------------------------------------|--------------------------------|--------------------|--------------------|--------------------------------|--------------------|--------------------|
|                |                                                   |                   |               |                        |                                                              | Relative methylation (Cy5/Cy3) | Cy3 signal (Input) | Cy5 signal (MeDIP) | Relative methylation (Cy5/Cy3) | Cy3 signal (Input) | Cy5 signal (MeDIP) |
| A_68_P25210208 | chr7:77426309-77426353                            | AK148659:-1685    |               | PROMOTER               | 0.264                                                        | 0.564                          | 1140.19            | 643.21             | 0.149                          | 782.16             | 116.64             |
| A_68_P21071706 | chr2:25227652-25227698                            | NM_001081085:-166 | 2010317E24Rik | DIVERGENT_PROMOTER     | 0.263                                                        | 0.408                          | 1396.16            | 569.53             | 0.107                          | 1148.30            | 123.05             |
| A_68_P32226224 | chr19:60656314-60656358                           | NM_001172096:590  | 2700078E11Rik | INSIDE                 | 0.263                                                        | 0.528                          | 2263.29            | 1194.88            | 0.139                          | 1593.13            | 220.91             |
| A_68_P22900662 | chr4:48552839-48552883                            | NM_001145924:-92  | 5730528L13Rik | PROMOTER               | 0.263                                                        | 0.679                          | 2390.51            | 1622.23            | 0.178                          | 1855.54            | 330.55             |
| A_68_P25956918 | chr8:73987077-73987121                            | NM_022419:458     | Abhd8         | INSIDE                 | 0.263                                                        | 0.510                          | 1074.65            | 548.49             | 0.134                          | 913.13             | 122.63             |
| A_68_P30512950 | chr16:4964504-4964548                             | NM_028301:-196    | Anks3         | PROMOTER               | 0.263                                                        | 0.484                          | 3576.27            | 1730.55            | 0.127                          | 2482.98            | 316.07             |
| A_68_P30281417 | chr15:64214477-64214523                           | NM_010026:-19     | Asap1         | PROMOTER               | 0.263                                                        | 0.537                          | 1075.83            | 577.34             | 0.141                          | 854.13             | 120.74             |
| A_68_P31485630 | chr18:9450058-9450102                             | NM_026484:68      | Ceny          | INSIDE                 | 0.263                                                        | 0.645                          | 1115.46            | 719.09             | 0.170                          | 965.71             | 163.73             |
| A_68_P22318571 | chr3:89125906-89125950                            | NM_010108:873     | Efna3         | INSIDE                 | 0.263                                                        | 1.756                          | 11254.09           | 19767.21           | 0.461                          | 6990.29            | 3223.29            |
| A_68_P23446277 | chr5:3647175-3647234                              | NM_026033:732     | Gatad1        | INSIDE                 | 0.263                                                        | 0.480                          | 1156.23            | 555.11             | 0.126                          | 942.21             | 118.86             |
| A_68_P32213510 | chr19:58529067-58529111                           | NM_010279:-132    | Gfra1         | PROMOTER               | 0.263                                                        | 0.492                          | 1248.19            | 614.02             | 0.129                          | 922.96             | 119.40             |
| A_68_P26814363 | chr9:108241800-108241844                          | NM_008160:412     | Gpx1          | INSIDE                 | 0.263                                                        | 0.526                          | 1512.56            | 794.87             | 0.138                          | 1164.10            | 160.62             |
| A_68_P23807226 | chr5:75471874-75471918                            | NM_133256:271     | Gsx2          | INSIDE                 | 0.263                                                        | 0.572                          | 2189.19            | 1251.64            | 0.150                          | 1679.14            | 252.11             |
| A_68_P28269099 | chr12:17183377-17183426                           | NM_201531:293     | Kenf1         | INSIDE                 | 0.263                                                        | 0.449                          | 1423.46            | 639.55             | 0.118                          | 1023.25            | 121.10             |
| A_68_P28069993 | chr11:100620866-100620910                         | NM_001081194:204  | Kenh4         | INSIDE                 | 0.263                                                        | 0.627                          | 1564.29            | 980.36             | 0.165                          | 1237.72            | 203.74             |
| A_68_P27890038 | chr11:68369674-68369718                           | NM_146004:9       | Mfsd6l        | INSIDE                 | 0.263                                                        | 0.598                          | 1064.35            | 636.58             | 0.157                          | 937.70             | 147.62             |
| A_68_P22758679 | chr4:17780394-17780442                            | NM_019724:-210    | Mmp16         | PROMOTER               | 0.263                                                        | 1.556                          | 704.55             | 1096.48            | 0.410                          | 614.72             | 251.83             |
| A_68_P29689076 | chr14:68702020-68702064                           | NM_010910:102     | Nefl          | INSIDE                 | 0.263                                                        | 0.609                          | 1345.69            | 819.39             | 0.160                          | 980.66             | 156.81             |
| A_68_P26282996 | chr9:6168807-6168852                              | NM_027924:218     | Pdgfd         | INSIDE                 | 0.263                                                        | 0.506                          | 1127.69            | 570.19             | 0.133                          | 862.98             | 114.97             |
| A_68_P24984097 | chr7:17530264-17530308                            | NM_001099636:256  | Pnmal2        | INSIDE                 | 0.263                                                        | 0.483                          | 1145.78            | 552.86             | 0.127                          | 970.38             | 123.37             |
| A_68_P23269520 | chr4:124335988-124336032                          | NM_011141:1122    | Pou3f1        | INSIDE                 | 0.263                                                        | 0.410                          | 1436.85            | 589.49             | 0.108                          | 1120.14            | 120.65             |
| A_68_P26260675 | chr8:129494647-129494691                          | NM_172762:311     | Rbm34         | INSIDE                 | 0.263                                                        | 0.642                          | 889.38             | 570.92             | 0.169                          | 708.92             | 119.68             |
| A_68_P31003198 | chr17:3115122-3115166                             | NM_134123:173     | Scaf8         | INSIDE                 | 0.263                                                        | 0.617                          | 1848.61            | 1141.12            | 0.162                          | 1633.59            | 264.93             |
| A_68_P27284239 | chr10:80065786-80065830                           | NM_019575:182     | Scamp4        | INSIDE                 | 0.263                                                        | 0.374                          | 1973.96            | 738.89             | 0.098                          | 1545.77            | 152.22             |
| A_68_P25957539 | chr8:74093493-74093537                            | NM_011977:689     | Slc27a1       | INSIDE                 | 0.263                                                        | 0.656                          | 965.00             | 633.10             | 0.173                          | 689.33             | 118.92             |
| A_68_P20464815 | chr1:97564271-97564315                            | NM_009183:-121    | St8sia4       | PROMOTER               | 0.263                                                        | 0.602                          | 3080.86            | 1854.12            | 0.158                          | 2195.52            | 347.78             |
| A_68_P31150992 | chr17:34056973-34057020                           | NM_001025313:574  | Tapbp         | INSIDE                 | 0.263                                                        | 0.458                          | 1400.82            | 641.17             | 0.120                          | 1005.80            | 120.94             |
| A_68_P24053751 | chr5:123526467-123526511                          | NM_001039723:205  | Tmem120b      | INSIDE                 | 0.263                                                        | 0.472                          | 1791.91            | 846.46             | 0.124                          | 1346.43            | 167.23             |
| A_68_P24136194 | chr5:140024878-140024927                          | NM_013702:5051    | Unex          | DOWNSTREAM             | 0.263                                                        | 0.366                          | 1679.94            | 615.64             | 0.096                          | 1316.56            | 126.70             |
| A_68_P31879118 | chr18:83079545-83079600                           | NM_183033:-698    | Zfp516        | PROMOTER               | 0.263                                                        | 0.436                          | 1472.32            | 642.13             | 0.115                          | 1117.63            | 128.16             |
| A_68_P24954290 | chr7:6106969-6107013                              | NM_001013012:583  | Zfp787        | INSIDE                 | 0.263                                                        | 0.636                          | 2127.44            | 1353.98            | 0.167                          | 1612.30            | 269.57             |
| A_68_P24039804 | chr5:121062475-121062523                          | NM_029096:100     | 1110008J03Rik | INSIDE                 | 0.262                                                        | 0.569                          | 1261.98            | 717.52             | 0.149                          | 882.62             | 131.63             |
| A_68_P25327110 | chr7:100022539-100022587                          | NM_001080995:180  | 4632434I1Rik  | INSIDE                 | 0.262                                                        | 0.488                          | 1052.76            | 513.29             | 0.128                          | 925.58             | 118.30             |
| A_68_P22407412 | chr3:107399505-107399559                          | NM_007441:1584    | Alx3          | INSIDE                 | 0.262                                                        | 0.590                          | 1020.05            | 601.42             | 0.155                          | 781.24             | 120.71             |
| A_68_P26237608 | chr8:125566474-125566518                          | NM_001081379:-312 | Ankrd11       | PROMOTER               | 0.262                                                        | 0.647                          | 2276.19            | 1472.92            | 0.170                          | 1672.48            | 283.70             |
| A_68_P20936658 | chr1:193006394-193006440                          | NM_007498:796     | Atf3          | INSIDE                 | 0.262                                                        | 0.363                          | 1570.51            | 570.60             | 0.095                          | 1266.87            | 120.50             |
| A_68_P27186920 | chr10:62064870-62064914                           | NM_019553:154     | Ddx21         | INSIDE                 | 0.262                                                        | 0.630                          | 1524.72            | 961.32             | 0.165                          | 1259.10            | 207.79             |
| A_68_P32030687 | chr19:25680849-25680893                           | NM_177360:-4156   | Dmrt3         | PROMOTER               | 0.262                                                        | 0.496                          | 1556.60            | 772.47             | 0.130                          | 1183.93            | 154.18             |
| A_68_P30356910 | chr15:77801656-77801700                           | NM_018749:-424    | Eif3d         | PROMOTER               | 0.262                                                        | 0.709                          | 1621.73            | 1149.04            | 0.186                          | 1294.92            | 240.82             |
| A_68_P29249242 | chr13:97842053-97842097                           | NM_001100458:477  | Fam169a       | INSIDE                 | 0.262                                                        | 1.449                          | 7529.40            | 10913.83           | 0.380                          | 4994.78            | 1897.35            |
| A_68_P26612681 | chr9:69608333-69608380                            | NM_022378:391     | Foxb1         | INSIDE                 | 0.262                                                        | 0.575                          | 1502.34            | 863.18             | 0.151                          | 1310.12            | 197.56             |
| A_68_P24449231 | chr6:52176139-52176188                            | NM_010456:1206    | Hoxa9         | INSIDE                 | 0.262                                                        | 0.458                          | 1245.49            | 570.57             | 0.120                          | 974.02             | 116.97             |
| A_68_P23237284 | chr4:117587755-117587799                          | NM_146152:-172    | Ipo13         | PROMOTER               | 0.262                                                        | 0.488                          | 2105.90            | 1028.05            | 0.128                          | 1536.08            | 196.84             |
| A_68_P24759516 | chr6:113392769-113392813                          | NM_026365:228     | Jagn1         | INSIDE                 | 0.262                                                        | 0.447                          | 1223.78            | 546.49             | 0.117                          | 1001.61            | 117.06             |
| A_68_P24828015 | chr6:126594566-126594610                          | NM_010595:1231    | Kena1         | INSIDE                 | 0.262                                                        | 0.549                          | 1578.22            | 866.29             | 0.144                          | 1290.65            | 185.56             |
| A_68_P20256314 | chr1:58026706-58026750                            | NR_027630:-360    | Kctd18        | PROMOTER               | 0.262                                                        | 0.497                          | 1256.59            | 623.96             | 0.130                          | 934.48             | 121.78             |
| A_68_P24156414 | chr5:144165340-144165384                          | NM_025841:-136    | Kdelr2        | PROMOTER               | 0.262                                                        | 0.411                          | 1449.80            | 595.41             | 0.108                          | 1136.90            | 122.23             |
| A_68_P26580975 | chr9:64101634-64101678                            | NM_008927:-244    | Map2k1        | PROMOTER               | 0.262                                                        | 0.690                          | 1916.99            | 1322.23            | 0.181                          | 1631.38            | 295.05             |
| A_68_P32071016 | chr19:32670611-32670655                           | NM_001201470:428  | Papss2        | INSIDE                 | 0.262                                                        | 0.565                          | 905.97             | 511.93             | 0.148                          | 817.77             | 121.14             |
| A_68_P31701194 | chr18:51277202-51277246                           | NM_001081224:-327 | Prr16         | PROMOTER               | 0.262                                                        | 0.422                          | 2592.04            | 1093.66            | 0.111                          | 1981.48            | 219.32             |
| A_68_P23062643 | chr4:83131639-83131686                            | NM_133948:632     | Psip1         | INSIDE                 | 0.262                                                        | 0.465                          | 1213.13            | 564.02             | 0.122                          | 1010.70            | 123.17             |

| ProbeName      | Target position of probe on CpG island microarray | TargetID                 | GeneSymbol    | CpG island Description | Ratio of relative methylation (TiO <sub>2</sub> -NP/Vehicle) | Sham group                     |                    |                    | TiO <sub>2</sub> -H group      |                    |                    |
|----------------|---------------------------------------------------|--------------------------|---------------|------------------------|--------------------------------------------------------------|--------------------------------|--------------------|--------------------|--------------------------------|--------------------|--------------------|
|                |                                                   |                          |               |                        |                                                              | Relative methylation (Cy5/Cy3) | Cy3 signal (Input) | Cy5 signal (MeDIP) | Relative methylation (Cy5/Cy3) | Cy3 signal (Input) | Cy5 signal (MeDIP) |
| A_68_P24170393 | chr5:147657202-147657261                          | NM_026864:585            | Ras111a       | INSIDE                 | 0.262                                                        | 0.628                          | 862.86             | 542.00             | 0.165                          | 744.37             | 122.61             |
| A_68_P25265202 | chr7:87331967-87332011                            | NM_013659:262            | Sema4b        | INSIDE                 | 0.262                                                        | 0.668                          | 1106.61            | 739.41             | 0.175                          | 963.33             | 168.38             |
| A_68_P32775571 | chrX:156065929-156065973                          | NM_001135727:611         | Sh3kbp1       | INSIDE                 | 0.262                                                        | 2.135                          | 1953.68            | 4170.95            | 0.559                          | 864.18             | 482.74             |
| A_68_P27569489 | chr11:6525837-6525881                             | NR_034042:-5436          | Snora5c       | PROMOTER               | 0.262                                                        | 0.498                          | 3956.12            | 1972.10            | 0.131                          | 2837.34            | 371.25             |
| A_68_P29070327 | chr13:58009211-58009255                           | NM_001166464:461         | Spock1        | INSIDE                 | 0.262                                                        | 0.611                          | 949.70             | 580.03             | 0.160                          | 775.08             | 124.21             |
| A_68_P24125091 | chr5:137748534-137748578                          | NM_001109909:346         | Srrt          | INSIDE                 | 0.262                                                        | 0.429                          | 3285.78            | 1408.74            | 0.112                          | 2266.19            | 254.16             |
| A_68_P23616976 | chr5:38430129-38430184                            | NM_026959:-317           | Stx18         | PROMOTER               | 0.262                                                        | 0.520                          | 1055.52            | 548.62             | 0.136                          | 867.02             | 117.95             |
| A_68_P30580630 | chr16:18590465-18590509                           | NM_011532:-3424          | Tbx1          | PROMOTER               | 0.262                                                        | 0.636                          | 1959.90            | 1246.80            | 0.167                          | 1509.33            | 251.50             |
| A_68_P31468071 | chr18:5334781-5334825                             | NM_178722:-365           | Zfp438        | PROMOTER               | 0.262                                                        | 1.714                          | 6621.53            | 11347.19           | 0.449                          | 4557.49            | 2044.96            |
| A_68_P31465564 | chr18:4920657-4920701                             | ENSMUST00000138258:-24   |               | PROMOTER               | 0.262                                                        | 0.439                          | 1286.82            | 564.99             | 0.115                          | 1055.73            | 121.55             |
| A_68_P23611135 | chr5:37419493-37419537                            | ENSMUST00000165557:13371 |               | DOWNSTREAM             | 0.262                                                        | 0.463                          | 2112.57            | 978.45             | 0.121                          | 1495.76            | 181.64             |
| A_68_P24908455 | chr6:143048545-143048589                          | NM_001109688:61          | 5730419109Rik | INSIDE                 | 0.261                                                        | 1.471                          | 3034.78            | 4463.86            | 0.384                          | 2078.50            | 798.52             |
| A_68_P27404961 | chr10:102491000-102491044                         | NM_172553:389            | Alx1          | INSIDE                 | 0.261                                                        | 0.510                          | 1147.41            | 585.22             | 0.133                          | 905.64             | 120.72             |
| A_68_P23541721 | chr5:23929534-23929578                            | NM_007668:-208           | Cdk5          | DIVERGENT_PROMOTER     | 0.261                                                        | 0.398                          | 1823.91            | 725.47             | 0.104                          | 1213.29            | 125.79             |
| A_68_P31678447 | chr18:46887518-46887562                           | NM_033037:456            | Cdo1          | INSIDE                 | 0.261                                                        | 0.746                          | 5411.06            | 4034.95            | 0.194                          | 3873.70            | 753.00             |
| A_68_P29098531 | chr13:64471536-64471580                           | NM_009984:56             | Ctsl          | INSIDE                 | 0.261                                                        | 0.546                          | 1591.37            | 869.53             | 0.142                          | 1296.56            | 184.68             |
| A_68_P31951638 | chr19:10679902-10679946                           | NM_015735:-190           | Ddb1          | DIVERGENT_PROMOTER     | 0.261                                                        | 0.460                          | 2234.92            | 1027.13            | 0.120                          | 1698.49            | 204.09             |
| A_68_P21078047 | chr2:26207480-26207524                            | NM_001139503:128         | Dnlz          | INSIDE                 | 0.261                                                        | 0.427                          | 1395.73            | 596.10             | 0.111                          | 1101.89            | 122.80             |
| A_68_P22729160 | chr4:11248943-11248991                            | NM_001081201:312         | Dpy19l4       | INSIDE                 | 0.261                                                        | 0.567                          | 916.14             | 519.86             | 0.148                          | 782.07             | 115.62             |
| A_68_P28067422 | chr11:100181743-100181787                         | NM_011508:455            | Eifl          | INSIDE                 | 0.261                                                        | 0.526                          | 1833.83            | 964.85             | 0.137                          | 1286.42            | 176.57             |
| A_68_P23416731 | chr4:151506130-151506174                          | NM_019585:-3118          | Espn          | PROMOTER               | 0.261                                                        | 0.742                          | 3064.47            | 2273.83            | 0.193                          | 2069.66            | 400.14             |
| A_68_P29726036 | chr14:75530896-75530940                           | NM_027581:-228           | Lrrc63        | DIVERGENT_PROMOTER     | 0.261                                                        | 0.612                          | 1030.64            | 630.82             | 0.160                          | 946.64             | 151.42             |
| A_68_P28457455 | chr12:57637056-57637100                           | NM_001146198:-985        | Nkx2-1        | PROMOTER               | 0.261                                                        | 0.679                          | 2448.65            | 1661.89            | 0.177                          | 1953.15            | 346.47             |
| A_68_P25934101 | chr8:69212003-69212047                            | NM_016708:-31            | Npy5r         | DIVERGENT_PROMOTER     | 0.261                                                        | 0.691                          | 2268.25            | 1566.88            | 0.180                          | 1775.21            | 319.68             |
| A_68_P25256093 | chr7:85723547-85723591                            | NM_008746:-844           | Nrk3          | PROMOTER               | 0.261                                                        | 0.650                          | 1106.75            | 719.75             | 0.169                          | 839.19             | 142.23             |
| A_68_P25089408 | chr7:52071427-52071471                            | NM_001171024:-291        | Nup62-il4l1   | DIVERGENT_PROMOTER     | 0.261                                                        | 0.708                          | 1442.12            | 1021.06            | 0.185                          | 1029.63            | 190.19             |
| A_68_P26742492 | chr9:95459743-95459787                            | NM_198414:-471           | Paqr9         | PROMOTER               | 0.261                                                        | 0.585                          | 2114.75            | 1237.23            | 0.152                          | 1786.35            | 272.26             |
| A_68_P24808210 | chr6:122289199-122289250                          | NM_001042623:-2191       | Phc1          | PROMOTER               | 0.261                                                        | 0.615                          | 853.00             | 524.41             | 0.161                          | 758.78             | 121.84             |
| A_68_P31093271 | chr17:23863763-23863807                           | NM_023058:482            | Pkmyt1        | INSIDE                 | 0.261                                                        | 0.619                          | 3258.03            | 2016.07            | 0.161                          | 2439.27            | 393.82             |
| A_68_P21019038 | chr2:13976735-13976779                            | NM_001012396:906         | Ptpla         | INSIDE                 | 0.261                                                        | 0.441                          | 1408.43            | 620.68             | 0.115                          | 1048.47            | 120.55             |
| A_68_P26811065 | chr9:107673263-107673307                          | NM_148930:49             | Rbm5          | INSIDE                 | 0.261                                                        | 0.581                          | 3298.25            | 1915.74            | 0.151                          | 2540.08            | 384.63             |
| A_68_P29152215 | chr13:76080947-76080991                           | NM_028493:304            | Rhobtb3       | INSIDE                 | 0.261                                                        | 0.649                          | 1542.39            | 1000.33            | 0.169                          | 1357.99            | 229.92             |
| A_68_P23523573 | chr5:20457890-20457941                            | NM_001080977:-275        | Rsbtl1        | PROMOTER               | 0.261                                                        | 0.601                          | 951.08             | 571.17             | 0.157                          | 736.57             | 115.32             |
| A_68_P24464120 | chr6:54516036-54516080                            | NM_027268:318            | Sern1         | INSIDE                 | 0.261                                                        | 0.611                          | 2879.70            | 1758.99            | 0.159                          | 2081.78            | 331.40             |
| A_68_P25961696 | chr8:75015878-75015926                            | NM_177766:611            | Sle35e1       | INSIDE                 | 0.261                                                        | 0.406                          | 1478.90            | 600.55             | 0.106                          | 1216.53            | 128.73             |
| A_68_P24773075 | chr6:115758321-115758365                          | NR_028546:-221           | Snora7a       | PROMOTER               | 0.261                                                        | 0.422                          | 1285.48            | 542.41             | 0.110                          | 1070.96            | 117.83             |
| A_68_P30721030 | chr16:44347912-44347958                           | NM_144550:421            | Spice1        | INSIDE                 | 0.261                                                        | 1.462                          | 1597.91            | 2336.91            | 0.381                          | 1233.66            | 470.42             |
| A_68_P21101537 | chr2:29989486-29989530                            | NM_146252:118            | Tbc1d13       | INSIDE                 | 0.261                                                        | 0.307                          | 1950.56            | 598.97             | 0.080                          | 1516.43            | 121.56             |
| A_68_P24033990 | chr5:120120273-120120317                          | NM_011535:-383           | Tbx3          | PROMOTER               | 0.261                                                        | 0.394                          | 1541.12            | 606.70             | 0.103                          | 1242.43            | 127.87             |
| A_68_P28261129 | chr12:15821863-15821907                           | NM_144551:1707           | Trib2         | INSIDE                 | 0.261                                                        | 0.514                          | 2868.64            | 1474.94            | 0.134                          | 2134.33            | 286.42             |
| A_68_P22485523 | chr3:122686980-122687024                          | NM_133857:363            | Usp53         | INSIDE                 | 0.261                                                        | 0.520                          | 1295.91            | 673.84             | 0.135                          | 1054.22            | 142.82             |
| A_68_P26467229 | chr9:44169555-44169599                            | NM_027889:177            | Vps11         | INSIDE                 | 0.261                                                        | 0.687                          | 2489.70            | 1710.48            | 0.180                          | 1802.70            | 323.81             |
| A_68_P25018706 | chr7:28516596-28516644                            | NM_009560:193            | Zfp60         | INSIDE                 | 0.261                                                        | 0.635                          | 947.15             | 601.13             | 0.166                          | 751.37             | 124.48             |
| A_68_P25735800 | chr8:28087824-28087868                            | NM_001101502:39          | Zfp703        | INSIDE                 | 0.261                                                        | 0.608                          | 2335.99            | 1420.43            | 0.159                          | 1711.28            | 271.44             |
| A_68_P23282963 | chr4:126645533-126645577                          | NM_001114399:-387        | Zmym4         | PROMOTER               | 0.261                                                        | 0.562                          | 972.88             | 547.04             | 0.147                          | 814.24             | 119.47             |
| A_68_P31456431 | chr17:95149568-95149616                           | NR_024720:153            | 2700099C18Rik | INSIDE                 | 0.260                                                        | 0.642                          | 1050.61            | 674.32             | 0.167                          | 722.30             | 120.75             |
| A_68_P23545745 | chr5:24606880-24606928                            | NR_027851:112            | 2900005J15Rik | INSIDE                 | 0.260                                                        | 0.644                          | 954.35             | 614.72             | 0.167                          | 713.29             | 119.41             |
| A_68_P24865611 | chr6:135148370-135148414                          | NM_028982:388            | 8430419L09Rik | INSIDE                 | 0.260                                                        | 0.604                          | 1708.37            | 1032.67            | 0.157                          | 1212.46            | 190.53             |
| A_68_P26569951 | chr9:62189186-62189230                            | NM_009672:59             | Anp32a        | INSIDE                 | 0.260                                                        | 0.687                          | 1240.19            | 851.51             | 0.178                          | 844.25             | 150.60             |
| A_68_P27900654 | chr11:70246223-70246267                           | NM_145429:90             | Arrb2         | INSIDE                 | 0.260                                                        | 0.482                          | 1798.49            | 867.27             | 0.125                          | 1423.92            | 178.46             |
| A_68_P21072314 | chr2:25316726-25316774                            | NM_153557:-136           | BC029214      | PROMOTER               | 0.260                                                        | 0.557                          | 1151.09            | 640.91             | 0.145                          | 816.77             | 118.22             |

| ProbeName      | Target position of probe on CpG island microarray | TargetID                | GeneSymbol    | CpG island Description | Ratio of relative methylation (TiO <sub>2</sub> -NP/Vehicle) | Sham group                     |                    |                    | TiO <sub>2</sub> -H group      |                    |                    |
|----------------|---------------------------------------------------|-------------------------|---------------|------------------------|--------------------------------------------------------------|--------------------------------|--------------------|--------------------|--------------------------------|--------------------|--------------------|
|                |                                                   |                         |               |                        |                                                              | Relative methylation (Cy5/Cy3) | Cy3 signal (Input) | Cy5 signal (MeDIP) | Relative methylation (Cy5/Cy3) | Cy3 signal (Input) | Cy5 signal (MeDIP) |
| A_68_P29530310 | chr14:35316304-35316358                           | NM_009758:-598          | Bmpr1a        | PROMOTER               | 0.260                                                        | 0.483                          | 1204.06            | 581.45             | 0.126                          | 927.24             | 116.61             |
| A_68_P23094814 | chr4:88941150-88941194                            | NM_009877:-649          | Cdkn2a        | PROMOTER               | 0.260                                                        | 0.605                          | 1710.14            | 1034.46            | 0.157                          | 1371.20            | 215.88             |
| A_68_P26846411 | chr9:114690663-114690707                          | NM_133978:263           | Cmtm7         | INSIDE                 | 0.260                                                        | 0.610                          | 3026.72            | 1847.42            | 0.159                          | 2275.93            | 361.86             |
| A_68_P23543724 | chr5:24256980-24257024                            | NM_153076:6659          | Crygn         | INSIDE                 | 0.260                                                        | 0.620                          | 921.89             | 571.35             | 0.161                          | 754.76             | 121.85             |
| A_68_P21421465 | chr2:91076866-91076910                            | NM_028119:335           | Ddb2          | INSIDE                 | 0.260                                                        | 0.573                          | 1487.24            | 852.56             | 0.149                          | 1141.67            | 170.00             |
| A_68_P29787828 | chr14:87540919-87540963                           | NM_019670:-19           | Diap3         | PROMOTER               | 0.260                                                        | 0.445                          | 1272.45            | 566.38             | 0.116                          | 1054.15            | 122.07             |
| A_68_P20352840 | chr1:75233023-75233067                            | NM_001159885:-232       | Dnajb2        | PROMOTER               | 0.260                                                        | 0.555                          | 1122.62            | 623.32             | 0.145                          | 806.66             | 116.66             |
| A_68_P21746892 | chr2:151796494-151796538                          | NM_028666:3194          | Fam110a       | INSIDE                 | 0.260                                                        | 1.403                          | 954.40             | 1339.09            | 0.364                          | 679.62             | 247.63             |
| A_68_P31947674 | chr19:10056973-10057017                           | NM_010239:-198          | Fth1          | PROMOTER               | 0.260                                                        | 0.530                          | 1611.95            | 854.66             | 0.138                          | 1292.12            | 178.30             |
| A_68_P23977821 | chr5:110536870-110536914                          | NM_145147:324           | Gtbp6         | INSIDE                 | 0.260                                                        | 0.481                          | 1316.34            | 632.71             | 0.125                          | 935.37             | 116.70             |
| A_68_P24444427 | chr6:51419364-51419408                            | NM_016806:507           | Hnrnpa2b1     | INSIDE                 | 0.260                                                        | 0.495                          | 7818.60            | 3872.52            | 0.129                          | 5293.75            | 682.31             |
| A_68_P20391713 | chr1:82287149-82287194                            | NM_010570:843           | Irs1          | INSIDE                 | 0.260                                                        | 0.563                          | 1174.25            | 661.49             | 0.146                          | 876.78             | 128.25             |
| A_68_P30991545 | chr16:96413628-96413672                           | NM_001001492:214        | Lca5l         | INSIDE                 | 0.260                                                        | 0.598                          | 1019.46            | 609.31             | 0.155                          | 960.75             | 149.18             |
| A_68_P28099907 | chr11:106022041-106022085                         | NM_172397:-606          | Limd2         | PROMOTER               | 0.260                                                        | 0.509                          | 1120.65            | 570.89             | 0.133                          | 885.89             | 117.42             |
| A_68_P29453032 | chr14:22319904-22319948                           | NM_017479:920           | Myst4         | INSIDE                 | 0.260                                                        | 0.602                          | 1831.59            | 1101.96            | 0.156                          | 1439.74            | 225.28             |
| A_68_P27539158 | chr10:127473288-127473332                         | NM_001113199:909        | Naca          | INSIDE                 | 0.260                                                        | 0.610                          | 881.38             | 537.32             | 0.159                          | 729.80             | 115.75             |
| A_68_P24444195 | chr6:51382942-51382986                            | NM_010903:296           | Nfe2l3        | INSIDE                 | 0.260                                                        | 0.527                          | 1729.63            | 911.74             | 0.137                          | 1332.69            | 182.34             |
| A_68_P31774685 | chr18:64499703-64499747                           | NM_194268:-293          | Onecut2       | PROMOTER               | 0.260                                                        | 0.642                          | 2246.19            | 1442.58            | 0.167                          | 1660.70            | 277.03             |
| A_68_P27892526 | chr11:68821691-68821735                           | NM_001159519:250        | Pfas          | INSIDE                 | 0.260                                                        | 0.679                          | 1985.15            | 1347.58            | 0.177                          | 1438.44            | 253.91             |
| A_68_P22350678 | chr3:96500622-96500667                            | NM_001165949:-354       | Pias3         | PROMOTER               | 0.260                                                        | 0.490                          | 1885.22            | 923.57             | 0.127                          | 1452.62            | 185.08             |
| A_68_P21351698 | chr2:76513834-76513878                            | NM_031256:485           | Plekha3       | INSIDE                 | 0.260                                                        | 0.603                          | 1034.89            | 623.53             | 0.157                          | 927.69             | 145.59             |
| A_68_P29032313 | chr13:51504178-51504222                           | NM_010101:214           | S1pr3         | INSIDE                 | 0.260                                                        | 0.719                          | 3156.51            | 2268.83            | 0.187                          | 2171.75            | 406.64             |
| A_68_P31929913 | chr19:5654718-5654762                             | NM_001164480:8967       | Sipa1         | INSIDE                 | 0.260                                                        | 0.609                          | 1556.45            | 947.97             | 0.159                          | 948.49             | 150.47             |
| A_68_P31138855 | chr17:31433416-31433460                           | NM_153062:1011          | Slec37a1      | INSIDE                 | 0.260                                                        | 0.535                          | 1291.17            | 690.63             | 0.139                          | 864.92             | 120.08             |
| A_68_P28615264 | chr12:88640362-88640406                           | NM_011479:88796         | Sptlc2        | DOWNSTREAM             | 0.260                                                        | 0.742                          | 4012.53            | 2977.58            | 0.193                          | 2737.51            | 527.21             |
| A_68_P20936015 | chr1:192886699-192886743                          | NM_001163421:91         | Tatdn3        | INSIDE                 | 0.260                                                        | 0.715                          | 1415.22            | 1011.79            | 0.186                          | 1138.24            | 211.49             |
| A_68_P32258642 | chrX:11385042-11385086                            |                         | Unknown       |                        | 0.260                                                        | 1.610                          | 4746.81            | 7643.78            | 0.419                          | 1923.65            | 806.44             |
| A_68_P21747253 | chr2:151855262-151855306                          |                         | Unknown       |                        | 0.260                                                        | 0.487                          | 1772.34            | 862.49             | 0.127                          | 1317.40            | 166.97             |
| A_68_P25068310 | chr7:46807771-46807818                            | AK053739:-71            |               | DIVERGENT_PROMOTER     | 0.260                                                        | 0.634                          | 1141.45            | 723.54             | 0.165                          | 812.99             | 133.89             |
| A_68_P23268973 | chr4:124252578-124252622                          | ENSMUST00000164308:6168 |               | INSIDE                 | 0.260                                                        | 0.541                          | 2450.67            | 1324.64            | 0.141                          | 1967.24            | 276.47             |
| A_68_P25594223 | chr7:149557894-149557939                          | NM_177265:248           | 6330512M04Rik | INSIDE                 | 0.259                                                        | 0.597                          | 1039.87            | 621.10             | 0.155                          | 751.83             | 116.47             |
| A_68_P31108555 | chr17:26275483-26275527                           | NM_001159598:-126       | Axin1         | PROMOTER               | 0.259                                                        | 0.549                          | 2182.74            | 1197.45            | 0.142                          | 1680.47            | 238.80             |
| A_68_P31423374 | chr17:87846116-87846160                           | NM_007589:137           | Calm2         | INSIDE                 | 0.259                                                        | 0.559                          | 3168.11            | 1772.10            | 0.145                          | 2303.86            | 333.19             |
| A_68_P24467403 | chr6:55067907-55067951                            | NM_009953:15038         | Chr2          | INSIDE                 | 0.259                                                        | 0.413                          | 1531.70            | 633.35             | 0.107                          | 1247.41            | 133.69             |
| A_68_P28248079 | chr12:13255873-13255917                           | NM_134040:86            | Ddx1          | INSIDE                 | 0.259                                                        | 0.410                          | 1363.21            | 558.60             | 0.106                          | 1130.66            | 120.11             |
| A_68_P29651216 | chr14:62268043-62268087                           | NR_028264:33146         | Dleu2         | INSIDE                 | 0.259                                                        | 0.665                          | 1283.83            | 854.01             | 0.172                          | 1162.00            | 200.09             |
| A_68_P26129637 | chr8:107165970-107166027                          | NM_026753:-370          | Fam96b        | PROMOTER               | 0.259                                                        | 0.606                          | 935.90             | 567.32             | 0.157                          | 739.15             | 115.93             |
| A_68_P27094090 | chr10:41997470-41997514                           | NM_019740:-944          | Foxo3         | PROMOTER               | 0.259                                                        | 0.371                          | 3378.20            | 1254.08            | 0.096                          | 2531.14            | 243.64             |
| A_68_P24589798 | chr6:82723620-82723664                            | NM_013820:806           | Hk2           | INSIDE                 | 0.259                                                        | 0.608                          | 1041.30            | 633.02             | 0.157                          | 861.69             | 135.63             |
| A_68_P30366913 | chr15:79342515-79342567                           | NM_134090:-4297         | Kdelr3        | DIVERGENT_PROMOTER     | 0.259                                                        | 0.605                          | 1135.05            | 686.84             | 0.157                          | 791.57             | 124.14             |
| A_68_P32560534 | chrX:97821357-97821401                            | NM_008446:-25           | Kif4          | DIVERGENT_PROMOTER     | 0.259                                                        | 1.624                          | 1122.58            | 1823.48            | 0.422                          | 487.74             | 205.59             |
| A_68_P22793479 | chr4:26273870-26273915                            | NM_172865:-93           | Manca         | PROMOTER               | 0.259                                                        | 0.636                          | 2350.69            | 1495.72            | 0.165                          | 1838.38            | 302.63             |
| A_68_P28605828 | chr12:87087327-87087371                           | NM_145447:-140          | Mfsd7c        | PROMOTER               | 0.259                                                        | 0.650                          | 1866.08            | 1212.86            | 0.168                          | 1477.13            | 248.37             |
| A_68_P20224246 | chr1:51972071-51972115                            | NM_001161817:726        | Myo1b         | INSIDE                 | 0.259                                                        | 0.508                          | 1107.72            | 562.21             | 0.132                          | 985.99             | 129.71             |
| A_68_P29309818 | chr13:108948386-108948430                         | NM_001127346:411        | Ndufa2        | INSIDE                 | 0.259                                                        | 0.540                          | 2197.54            | 1186.04            | 0.140                          | 1671.17            | 233.20             |
| A_68_P25092989 | chr7:52671296-52671340                            | NM_198190:2254          | Ntf5          | INSIDE                 | 0.259                                                        | 1.361                          | 2359.88            | 3212.89            | 0.352                          | 1741.58            | 612.93             |
| A_68_P31098617 | chr17:24769589-24769637                           | NM_008743:-14           | Nth1          | DIVERGENT_PROMOTER     | 0.259                                                        | 0.438                          | 1343.19            | 587.77             | 0.113                          | 1033.40            | 116.93             |
| A_68_P26727063 | chr9:92437135-92437179                            | NM_001142916:96         | Plod2         | INSIDE                 | 0.259                                                        | 0.406                          | 1465.54            | 595.12             | 0.105                          | 1253.35            | 131.64             |
| A_68_P20184679 | chr1:42755285-42755329                            | NM_008900:1316          | Pou3f3        | INSIDE                 | 0.259                                                        | 0.342                          | 1670.37            | 572.10             | 0.089                          | 1297.84            | 115.19             |
| A_68_P28035915 | chr11:94852120-94852164                           | NM_172261:-383          | Ppp1r9b       | PROMOTER               | 0.259                                                        | 0.656                          | 2162.62            | 1419.34            | 0.170                          | 1618.29            | 275.48             |
| A_68_P24618289 | chr6:87762138-87762182                            | NM_001039394:-387       | Rab43         | PROMOTER               | 0.259                                                        | 1.426                          | 4902.32            | 6989.80            | 0.369                          | 3081.41            | 1138.39            |

| ProbeName      | Target position of probe on CpG island microarray | TargetID           | GeneSymbol    | CpG island Description | Ratio of relative methylation (TiO <sub>2</sub> -NP/Vehicle) | Sham group                     |                    |                    | TiO <sub>2</sub> -H group      |                    |                    |
|----------------|---------------------------------------------------|--------------------|---------------|------------------------|--------------------------------------------------------------|--------------------------------|--------------------|--------------------|--------------------------------|--------------------|--------------------|
|                |                                                   |                    |               |                        |                                                              | Relative methylation (Cy5/Cy3) | Cy3 signal (Input) | Cy5 signal (MeDIP) | Relative methylation (Cy5/Cy3) | Cy3 signal (Input) | Cy5 signal (MeDIP) |
| A_68_P23312646 | chr4:132065845-132065889                          | NM_144907:505      | Sesn2         | INSIDE                 | 0.259                                                        | 0.589                          | 985.42             | 580.54             | 0.153                          | 759.13             | 116.03             |
| A_68_P31138852 | chr17:31433001-31433045                           | NM_153062:595      | Slc37a1       | INSIDE                 | 0.259                                                        | 0.647                          | 1554.79            | 1006.32            | 0.167                          | 1278.81            | 214.11             |
| A_68_P30478329 | chr15:98956569-98956613                           | NM_139140:-685     | Spats2        | PROMOTER               | 0.259                                                        | 0.401                          | 2401.18            | 963.44             | 0.104                          | 1683.67            | 175.17             |
| A_68_P25102496 | chr7:54263191-54263240                            | NM_175318:569      | Spty2d1       | INSIDE                 | 0.259                                                        | 0.641                          | 1605.62            | 1028.44            | 0.166                          | 1192.96            | 197.82             |
| A_68_P20833435 | chr1:174430368-174430412                          | NM_178598:14       | Tagln2        | INSIDE                 | 0.259                                                        | 0.561                          | 1076.93            | 604.25             | 0.145                          | 856.45             | 124.37             |
| A_68_P27290580 | chr10:81033862-81033910                           | NM_019725:-4390    | Tle2          | PROMOTER               | 0.259                                                        | 0.485                          | 1276.90            | 619.11             | 0.125                          | 922.00             | 115.67             |
| A_68_P27947945 | chr11:79068066-79068110                           | NM_019653:109      | Wsb1          | INSIDE                 | 0.259                                                        | 0.695                          | 1869.44            | 1298.95            | 0.180                          | 1284.56            | 231.41             |
| A_68_P27288030 | chr10:80657437-80657487                           | NR_015477:27       | 2310050B05Rik | INSIDE                 | 0.258                                                        | 0.577                          | 951.66             | 548.79             | 0.149                          | 792.99             | 117.91             |
| A_68_P28081367 | chr11:102635750-102635794                         | NM_001110778:13020 | Adam11        | INSIDE                 | 0.258                                                        | 0.657                          | 858.17             | 564.16             | 0.169                          | 742.98             | 125.83             |
| A_68_P29269562 | chr13:101439843-101439887                         | NM_001168386:429   | Ccdc125       | INSIDE                 | 0.258                                                        | 0.498                          | 1358.06            | 676.80             | 0.129                          | 1221.28            | 157.21             |
| A_68_P26814948 | chr9:108354920-108354964                          | NM_133744:-7906    | Ccdc71        | PROMOTER               | 0.258                                                        | 0.682                          | 2070.73            | 1412.54            | 0.176                          | 1567.50            | 275.79             |
| A_68_P28743716 | chr12:112615206-112615250                         | NM_183016:701      | Cdc42bpb      | INSIDE                 | 0.258                                                        | 0.476                          | 3007.78            | 1430.22            | 0.123                          | 2145.77            | 263.65             |
| A_68_P20613814 | chr1:133034401-133034445                          | NM_145508:389      | Dyrk3         | INSIDE                 | 0.258                                                        | 0.521                          | 1882.84            | 980.99             | 0.135                          | 1552.70            | 208.88             |
| A_68_P25582340 | chr7:147302368-147302412                          | NM_053119:-68      | Echs1         | DIVERGENT_PROMOTER     | 0.258                                                        | 0.566                          | 3901.65            | 2206.87            | 0.146                          | 3156.08            | 459.78             |
| A_68_P22348573 | chr3:96081761-96081812                            | NM_010186:16106    | Fcgr1         | DOWNSTREAM             | 0.258                                                        | 0.428                          | 1339.42            | 573.08             | 0.110                          | 1067.05            | 117.67             |
| A_68_P26761419 | chr9:98855194-98855238                            | NR_003248:513      | Foxl2os       | INSIDE                 | 0.258                                                        | 0.554                          | 995.23             | 551.29             | 0.143                          | 826.08             | 117.92             |
| A_68_P23510640 | chr5:17865451-17865500                            | NM_010305:756      | Gnai1         | INSIDE                 | 0.258                                                        | 0.524                          | 1027.11            | 538.29             | 0.135                          | 882.05             | 119.26             |
| A_68_P30497015 | chr15:102110224-102110272                         | NM_134100:362      | Mfsd5         | INSIDE                 | 0.258                                                        | 0.596                          | 913.35             | 544.77             | 0.154                          | 766.22             | 117.76             |
| A_68_P31222784 | chr17:49567933-49567977                           | NM_020042:266      | Mocs1         | INSIDE                 | 0.258                                                        | 0.623                          | 1012.45            | 631.16             | 0.161                          | 833.11             | 134.07             |
| A_68_P24643637 | chr6:92133635-92133679                            | NM_025578:361      | Mrps25        | INSIDE                 | 0.258                                                        | 0.471                          | 1218.06            | 574.11             | 0.121                          | 998.31             | 121.24             |
| A_68_P21579979 | chr2:121115051-121115098                          | NM_032393:-263     | Mtap1a        | PROMOTER               | 0.258                                                        | 0.454                          | 1406.73            | 638.29             | 0.117                          | 1024.38            | 119.88             |
| A_68_P24302042 | chr6:24477224-24477272                            | NM_026614:439      | Ndufa5        | INSIDE                 | 0.258                                                        | 0.498                          | 1296.76            | 646.39             | 0.129                          | 1005.79            | 129.36             |
| A_68_P30365773 | chr15:79158644-79158688                           | NM_001199023:135   | Pla2g6        | INSIDE                 | 0.258                                                        | 0.677                          | 4985.11            | 3376.22            | 0.175                          | 3564.43            | 622.24             |
| A_68_P21078344 | chr2:26245012-26245056                            | NM_173180:167      | Pmpca         | INSIDE                 | 0.258                                                        | 0.683                          | 3723.02            | 2544.40            | 0.176                          | 2491.77            | 439.28             |
| A_68_P31936610 | chr19:6984035-6984079                             | NM_012021:79       | Prdx5         | INSIDE                 | 0.258                                                        | 0.530                          | 1234.11            | 654.53             | 0.137                          | 872.43             | 119.46             |
| A_68_P25090472 | chr7:52242228-52242277                            | NM_019830:-550     | Prmt1         | PROMOTER               | 0.258                                                        | 0.440                          | 1220.67            | 536.62             | 0.114                          | 1032.71            | 117.24             |
| A_68_P24834758 | chr6:127717838-127717882                          | NM_201371:887      | Prmt8         | INSIDE                 | 0.258                                                        | 0.454                          | 1249.15            | 567.32             | 0.117                          | 1041.14            | 121.95             |
| A_68_P31000877 | chr16:97985236-97985280                           | NM_023663:104      | Ripk4         | INSIDE                 | 0.258                                                        | 0.585                          | 1650.93            | 965.70             | 0.151                          | 1308.98            | 197.71             |
| A_68_P26344889 | chr9:20780299-20780343                            | NM_010333:917      | S1pr2         | INSIDE                 | 0.258                                                        | 0.333                          | 1678.98            | 558.95             | 0.086                          | 1407.01            | 121.05             |
| A_68_P26645323 | chr9:75531947-75531992                            | NM_001164790:-106  | Seg3          | PROMOTER               | 0.258                                                        | 0.342                          | 1926.36            | 658.56             | 0.088                          | 1402.14            | 123.81             |
| A_68_P25961699 | chr8:75016300-75016344                            | NM_177766:191      | Slc35e1       | INSIDE                 | 0.258                                                        | 0.351                          | 1716.66            | 603.10             | 0.091                          | 1381.07            | 125.22             |
| A_68_P20456743 | chr1:95532366-95532410                            | NM_021537:-84      | Stk25         | PROMOTER               | 0.258                                                        | 0.638                          | 1464.50            | 934.08             | 0.165                          | 1204.52            | 198.39             |
| A_68_P32241630 | chrX:7651107-7651151                              | NM_011514:758      | Suv39h1       | INSIDE                 | 0.258                                                        | 1.452                          | 3468.64            | 5035.74            | 0.375                          | 1484.14            | 556.46             |
| A_68_P30887980 | chr16:77014501-77014545                           | NM_013918:209      | Usp25         | INSIDE                 | 0.258                                                        | 0.617                          | 1777.23            | 1096.07            | 0.159                          | 1478.42            | 235.57             |
| A_68_P23971891 | chr5:108863299-108863343                          | NM_007507:77       | Atp5k         | INSIDE                 | 0.257                                                        | 0.700                          | 3174.55            | 2223.18            | 0.180                          | 2375.54            | 427.66             |
| A_68_P25729004 | chr8:26895328-26895372                            | NM_026121:331      | Bag4          | INSIDE                 | 0.257                                                        | 0.726                          | 2088.94            | 1516.27            | 0.187                          | 1593.79            | 297.73             |
| A_68_P23314122 | chr4:132352279-132352323                          | NM_001033308:-21   | BC013712      | PROMOTER               | 0.257                                                        | 0.524                          | 1021.92            | 535.19             | 0.134                          | 881.43             | 118.45             |
| A_68_P22338542 | chr3:94168357-94168405                            | NM_001136117:2015  | C2cd4d        | INSIDE                 | 0.257                                                        | 0.585                          | 989.64             | 579.24             | 0.150                          | 779.66             | 117.12             |
| A_68_P30588539 | chr16:20621997-20622043                           | NM_028420:-669     | Camk2n2       | DIVERGENT_PROMOTER     | 0.257                                                        | 0.384                          | 1628.91            | 626.14             | 0.099                          | 1210.12            | 119.78             |
| A_68_P26140465 | chr8:109127899-109127943                          | NM_009864:653      | Cdh1          | INSIDE                 | 0.257                                                        | 0.666                          | 1669.23            | 1111.30            | 0.171                          | 1176.17            | 201.07             |
| A_68_P27281378 | chr10:79622976-79623020                           | NM_007705:-7587    | Cirbp         | PROMOTER               | 0.257                                                        | 0.342                          | 1867.22            | 638.63             | 0.088                          | 1413.73            | 124.08             |
| A_68_P29455223 | chr14:22666866-22666910                           | NM_026965:1244     | Comtd1        | INSIDE                 | 0.257                                                        | 0.664                          | 2081.90            | 1383.19            | 0.171                          | 1466.44            | 250.26             |
| A_68_P28089251 | chr11:103994664-103994708                         | NM_007762:491      | Crhr1         | INSIDE                 | 0.257                                                        | 0.456                          | 2043.80            | 932.74             | 0.118                          | 1551.33            | 182.30             |
| A_68_P31933638 | chr19:6277193-6277237                             | NM_010119:319      | Ehd1          | INSIDE                 | 0.257                                                        | 0.361                          | 4704.13            | 1698.35            | 0.093                          | 3546.43            | 328.91             |
| A_68_P20618864 | chr1:133904839-133904887                          | NM_007923:681      | Elk4          | INSIDE                 | 0.257                                                        | 0.515                          | 1770.28            | 911.89             | 0.132                          | 1351.53            | 179.07             |
| A_68_P31053798 | chr17:12962714-12962758                           | NM_010515:-164     | Igf2r         | PROMOTER               | 0.257                                                        | 0.470                          | 1654.62            | 777.03             | 0.121                          | 1331.45            | 160.65             |
| A_68_P26546341 | chr9:58046993-58047037                            | NM_001161535:2508  | Islr2         | INSIDE                 | 0.257                                                        | 0.594                          | 930.73             | 552.98             | 0.153                          | 796.38             | 121.54             |
| A_68_P32028430 | chr19:25311947-25311991                           | NM_181404:277      | Kank1         | INSIDE                 | 0.257                                                        | 0.619                          | 864.99             | 535.12             | 0.159                          | 721.55             | 114.79             |
| A_68_P30477339 | chr15:98748465-98748509                           | NM_029098:43       | Lmbr11        | INSIDE                 | 0.257                                                        | 0.535                          | 1280.29            | 684.76             | 0.138                          | 1047.75            | 144.24             |
| A_68_P28084320 | chr11:103128905-103128949                         | NM_016896:-211     | Map3k14       | PROMOTER               | 0.257                                                        | 0.471                          | 1406.35            | 662.20             | 0.121                          | 996.05             | 120.57             |
| A_68_P29512326 | chr14:32307928-32307972                           | NM_025907:213      | Mettl6        | INSIDE                 | 0.257                                                        | 0.637                          | 3846.95            | 2451.42            | 0.164                          | 2876.98            | 472.03             |

| ProbeName      | Target position of probe on CpG island microarray | TargetID              | GeneSymbol    | CpG island Description | Ratio of relative methylation (TiO <sub>2</sub> -NP/Vehicle) | Sham group                     |                    |                    | TiO <sub>2</sub> -H group      |                    |                    |
|----------------|---------------------------------------------------|-----------------------|---------------|------------------------|--------------------------------------------------------------|--------------------------------|--------------------|--------------------|--------------------------------|--------------------|--------------------|
|                |                                                   |                       |               |                        |                                                              | Relative methylation (Cy5/Cy3) | Cy3 signal (Input) | Cy5 signal (MeDIP) | Relative methylation (Cy5/Cy3) | Cy3 signal (Input) | Cy5 signal (MeDIP) |
| A_68_P27788128 | chr11:50172669-50172713                           | NR_030529:-1309       | Mir804        | PROMOTER               | 0.257                                                        | 0.575                          | 1876.93            | 1079.45            | 0.148                          | 1315.86            | 194.80             |
| A_68_P27835021 | chr11:58948977-58949031                           | NM_001171512:873      | Obscn         | INSIDE                 | 0.257                                                        | 0.532                          | 1261.38            | 670.51             | 0.137                          | 870.24             | 118.93             |
| A_68_P20506813 | chr11:108069803-108069847                         | NM_133821:1379        | Phlpp1        | INSIDE                 | 0.257                                                        | 0.405                          | 1464.44            | 592.73             | 0.104                          | 1114.65            | 115.93             |
| A_68_P26554636 | chr9:59505260-59505304                            | NM_011099:868         | Pkm2          | INSIDE                 | 0.257                                                        | 0.623                          | 1228.93            | 765.27             | 0.160                          | 997.34             | 159.31             |
| A_68_P27994099 | chr11:87217797-87217841                           | NM_053269:179         | Rad51c        | INSIDE                 | 0.257                                                        | 0.544                          | 949.30             | 516.49             | 0.140                          | 860.86             | 120.27             |
| A_68_P29618701 | chr14:56210506-56210552                           | NM_194346:-98         | Rnf31         | DIVERGENT_PROMOTER     | 0.257                                                        | 0.490                          | 1201.07            | 588.59             | 0.126                          | 969.33             | 122.31             |
| A_68_P24604448 | chr6:85282737-85282781                            | NM_178639:658         | Sfxn5         | INSIDE                 | 0.257                                                        | 0.485                          | 1204.68            | 584.81             | 0.125                          | 958.93             | 119.47             |
| A_68_P31836532 | chr18:75527265-75527309                           | NM_001042660:268      | Smad7         | INSIDE                 | 0.257                                                        | 0.355                          | 2708.69            | 960.49             | 0.091                          | 2229.45            | 203.56             |
| A_68_P22858653 | chr4:40704800-40704844                            | NM_021535:96          | Smu1          | INSIDE                 | 0.257                                                        | 0.522                          | 2101.67            | 1097.71            | 0.134                          | 1600.01            | 215.05             |
| A_68_P29605233 | chr14:52816767-52816813                           | NM_033618:124         | Supt16h       | INSIDE                 | 0.257                                                        | 0.546                          | 1965.22            | 1073.44            | 0.140                          | 1373.23            | 192.89             |
| A_68_P29418914 | chr14:14793253-14793298                           | NM_025435:464         | Thoc7         | INSIDE                 | 0.257                                                        | 1.810                          | 1746.58            | 3161.01            | 0.465                          | 1344.66            | 625.92             |
| A_68_P24994882 | chr7:20300214-20300266                            | NM_001109748:538      | Tomm40        | INSIDE                 | 0.257                                                        | 0.597                          | 1233.87            | 737.16             | 0.154                          | 810.04             | 124.51             |
| A_68_P23317939 | chr4:133054412-133054456                          | NM_001081156:31       | Trmp1         | INSIDE                 | 0.257                                                        | 0.640                          | 2171.98            | 1389.98            | 0.164                          | 1634.57            | 268.81             |
| A_68_P25798745 | chr8:40068907-40068951                            | NM_030254:8           | Tusc3         | INSIDE                 | 0.257                                                        | 0.501                          | 2686.88            | 1347.04            | 0.129                          | 2025.98            | 261.31             |
| A_68_P23141221 | chr4:98590064-98590123                            | NM_146144:-407        | Usp1          | PROMOTER               | 0.257                                                        | 0.460                          | 1246.18            | 573.60             | 0.118                          | 1016.12            | 120.01             |
| A_68_P29616217 | chr14:55710378-55710422                           | NM_001039198:485      | Zfx2          | INSIDE                 | 0.257                                                        | 0.671                          | 3657.23            | 2453.69            | 0.173                          | 2586.56            | 446.60             |
| A_68_P27835440 | chr11:59015809-59015853                           | NR_037964:103         | 2610507101Rik | INSIDE                 | 0.256                                                        | 0.488                          | 1229.36            | 599.64             | 0.125                          | 976.08             | 121.97             |
| A_68_P26569970 | chr9:62191389-62191433                            | NM_009672:2261        | Amp32a        | INSIDE                 | 0.256                                                        | 0.376                          | 1923.03            | 723.35             | 0.096                          | 1579.92            | 151.98             |
| A_68_P31380046 | chr17:80294471-80294516                           | NM_0191717:875        | Atl2          | INSIDE                 | 0.256                                                        | 0.423                          | 1900.27            | 804.48             | 0.108                          | 1656.10            | 179.57             |
| A_68_P22859202 | chr4:40801217-40801261                            | NM_022305:-207        | B4galt1       | PROMOTER               | 0.256                                                        | 0.655                          | 5248.09            | 3439.66            | 0.168                          | 3734.72            | 626.73             |
| A_68_P31125923 | chr17:29231167-29231211                           | NM_007669:472         | Cdkn1a        | INSIDE                 | 0.256                                                        | 0.468                          | 1219.23            | 570.02             | 0.120                          | 1002.53            | 119.97             |
| A_68_P26543677 | chr9:57612772-57612816                            | NM_007713:873         | Clk3          | INSIDE                 | 0.256                                                        | 0.710                          | 2611.59            | 1853.39            | 0.182                          | 2075.87            | 377.17             |
| A_68_P24780081 | chr6:117118598-117118642                          | NM_021704:68          | Cxcl12        | INSIDE                 | 0.256                                                        | 0.527                          | 3385.70            | 1785.81            | 0.135                          | 2469.10            | 333.23             |
| A_68_P26659608 | chr9:78291066-78291110                            | NM_173386:-134        | E330016A19Rik | DIVERGENT_PROMOTER     | 0.256                                                        | 0.648                          | 1462.04            | 948.02             | 0.166                          | 1212.77            | 201.24             |
| A_68_P20802627 | chr1:168930921-168930965                          | NM_001160261:-605     | Fam78b        | DIVERGENT_PROMOTER     | 0.256                                                        | 0.491                          | 1108.28            | 544.22             | 0.126                          | 962.92             | 121.06             |
| A_68_P31484553 | chr18:9213708-9213752                             | NM_008058:877         | Fzd8          | INSIDE                 | 0.256                                                        | 0.544                          | 2788.80            | 1517.27            | 0.139                          | 2149.47            | 299.46             |
| A_68_P28083514 | chr11:102993838-102993882                         | NM_001130516:-792     | Hexim2        | PROMOTER               | 0.256                                                        | 1.534                          | 1317.26            | 2021.04            | 0.394                          | 917.91             | 361.20             |
| A_68_P24798110 | chr6:120313882-120313931                          | NM_145997:-210        | Kdm5a         | DIVERGENT_PROMOTER     | 0.256                                                        | 0.411                          | 1599.14            | 656.93             | 0.105                          | 1153.34            | 121.36             |
| A_68_P31708194 | chr18:52689223-52689267                           | NM_010728:118         | Lox           | INSIDE                 | 0.256                                                        | 0.639                          | 1116.91            | 714.20             | 0.164                          | 922.54             | 151.29             |
| A_68_P25956629 | chr8:73904896-73904940                            | NM_010150:933         | Nr2f6         | INSIDE                 | 0.256                                                        | 0.680                          | 2607.97            | 1773.22            | 0.174                          | 1807.81            | 314.99             |
| A_68_P31029179 | chr17:8995332-8995389                             | NM_011866:751         | Pde10a        | INSIDE                 | 0.256                                                        | 0.381                          | 1595.08            | 607.53             | 0.098                          | 1245.60            | 121.50             |
| A_68_P30670426 | chr16:35490448-35490492                           | NM_028295:489         | Pdia5         | INSIDE                 | 0.256                                                        | 0.596                          | 2155.10            | 1283.41            | 0.153                          | 1781.12            | 272.00             |
| A_68_P23415895 | chr4:151370916-151370960                          | NM_172705:-650        | Phf13         | PROMOTER               | 0.256                                                        | 0.546                          | 1141.95            | 623.62             | 0.140                          | 837.73             | 117.06             |
| A_68_P20597392 | chr1:129765401-129765445                          | NM_178690:73          | Rab3gap1      | INSIDE                 | 0.256                                                        | 0.626                          | 1752.15            | 1097.06            | 0.160                          | 1416.28            | 226.66             |
| A_68_P20008180 | chr1:5008925-5008969                              | NM_021374:561         | Rgs20         | INSIDE                 | 0.256                                                        | 0.312                          | 1988.23            | 619.88             | 0.080                          | 1559.71            | 124.60             |
| A_68_P28938190 | chr13:34436028-34436072                           | NM_001033167:1001     | Slc22a23      | INSIDE                 | 0.256                                                        | 0.619                          | 1229.32            | 761.07             | 0.158                          | 921.92             | 145.95             |
| A_68_P31373355 | chr17:79135650-79135694                           | NM_011500:228         | Strn          | INSIDE                 | 0.256                                                        | 0.648                          | 2416.13            | 1566.20            | 0.166                          | 1760.83            | 292.30             |
| A_68_P31151041 | chr17:34066176-34066220                           | NM_001025313:9776     | Tapbp         | INSIDE                 | 0.256                                                        | 1.682                          | 1534.38            | 2580.59            | 0.431                          | 1104.55            | 476.40             |
| A_68_P26247722 | chr8:127316654-127316700                          | NM_198632:-242        | Trim67        | PROMOTER               | 0.256                                                        | 0.448                          | 1189.03            | 533.27             | 0.115                          | 1006.93            | 115.71             |
| A_68_P25158152 | chr7:66484943-66484987                            | NM_001033962:843      | Ubc3a         | INSIDE                 | 0.256                                                        | 0.485                          | 1627.14            | 789.31             | 0.124                          | 1358.78            | 168.87             |
| A_68_P30401588 | chr15:85407657-85407702                           | NM_001163634:821      | Wnt7b         | INSIDE                 | 0.256                                                        | 0.407                          | 1563.41            | 636.09             | 0.104                          | 1152.95            | 120.14             |
| A_68_P26744825 | chr9:95854980-95855036                            | NM_011916:-170        | Xrn1          | PROMOTER               | 0.256                                                        | 0.688                          | 1726.58            | 1187.18            | 0.176                          | 1312.62            | 231.39             |
| A_68_P25411540 | chr7:117204605-117204649                          | NM_009281:-589        | Zfp143        | PROMOTER               | 0.256                                                        | 0.524                          | 1155.24            | 605.15             | 0.134                          | 899.50             | 120.40             |
| A_68_P21382117 | chr2:81893227-81893271                            | NM_175513:-566        | Zfp804a       | PROMOTER               | 0.256                                                        | 0.626                          | 4735.49            | 2962.82            | 0.160                          | 3531.01            | 566.57             |
| A_68_P29961928 | chr14:122873448-122873492                         | NM_009574:-1135       | Zie2          | DIVERGENT_PROMOTER     | 0.256                                                        | 0.512                          | 2477.24            | 1268.52            | 0.131                          | 1979.82            | 259.46             |
| A_68_P20370555 | chr1:78213280-78213324                            |                       | Unknown       |                        | 0.256                                                        | 0.559                          | 1833.86            | 1025.99            | 0.143                          | 1329.44            | 190.55             |
| A_68_P30693865 | chr16:39984541-39984585                           | AK082117:-145         |               | PROMOTER               | 0.256                                                        | 0.611                          | 950.57             | 580.47             | 0.157                          | 830.70             | 130.05             |
| A_68_P25537617 | chr7:140122830-140122874                          | ENSMUST00000106157:28 |               | INSIDE                 | 0.256                                                        | 0.471                          | 3411.39            | 1606.56            | 0.121                          | 2458.19            | 296.38             |
| A_68_P27795275 | chr11:51502704-51502761                           | NM_025319:-596        | 0610009B22Rik | PROMOTER               | 0.255                                                        | 0.349                          | 1652.35            | 576.76             | 0.089                          | 1336.07            | 119.14             |
| A_68_P21682771 | chr2:139996347-139996391                          | NM_027093:-13         | 2310003L22Rik | DIVERGENT_PROMOTER     | 0.255                                                        | 0.594                          | 926.68             | 550.90             | 0.152                          | 801.64             | 121.71             |
| A_68_P28182972 | chr11:120050647-120050697                         | NR_030682:498         | 2810410L24Rik | INSIDE                 | 0.255                                                        | 0.531                          | 1271.45            | 674.60             | 0.135                          | 863.83             | 116.90             |



| ProbeName      | Target position of probe on CpG island microarray | TargetID           | GeneSymbol    | CpG island Description | Ratio of relative methylation (TiO <sub>2</sub> -NP/Vehicle) | Sham group                     |                    |                    | TiO <sub>2</sub> -H group      |                    |                    |
|----------------|---------------------------------------------------|--------------------|---------------|------------------------|--------------------------------------------------------------|--------------------------------|--------------------|--------------------|--------------------------------|--------------------|--------------------|
|                |                                                   |                    |               |                        |                                                              | Relative methylation (Cy5/Cy3) | Cy3 signal (Input) | Cy5 signal (MeDIP) | Relative methylation (Cy5/Cy3) | Cy3 signal (Input) | Cy5 signal (MeDIP) |
| A_68_P27661783 | chr11:26110740-26110784                           | NR_027973:-186     | 5730522E02Rik | PROMOTER               | 0.255                                                        | 0.552                          | 2000.73            | 1104.89            | 0.141                          | 1605.63            | 226.18             |
| A_68_P25737280 | chr8:28338452-28338496                            | NM_013462:1586     | Adrb3         | INSIDE                 | 0.255                                                        | 0.590                          | 1032.95            | 609.49             | 0.150                          | 815.87             | 122.62             |
| A_68_P20411442 | chr1:88199826-88199871                            | NM_145222:53       | B3gnt7        | INSIDE                 | 0.255                                                        | 0.510                          | 1093.64            | 557.52             | 0.130                          | 927.82             | 120.66             |
| A_68_P25032103 | chr7:31337454-31337505                            | NM_183321:-188     | BC053749      | DIVERGENT_PROMOTER     | 0.255                                                        | 0.594                          | 1222.36            | 725.97             | 0.152                          | 829.22             | 125.79             |
| A_68_P30977036 | chr16:93683818-93683862                           | NM_173047:377      | Cbr3          | INSIDE                 | 0.255                                                        | 0.518                          | 2863.07            | 1482.08            | 0.132                          | 2135.60            | 281.40             |
| A_68_P27894657 | chr11:69181886-69181930                           | NM_146019:1020     | Chd3          | INSIDE                 | 0.255                                                        | 0.602                          | 1082.25            | 651.85             | 0.154                          | 781.56             | 120.11             |
| A_68_P22829261 | chr4:34010768-34010823                            | NM_007726:-811     | Cnr1          | PROMOTER               | 0.255                                                        | 0.574                          | 1125.72            | 646.46             | 0.147                          | 878.96             | 128.87             |
| A_68_P30113001 | chr15:31153906-31153950                           | NM_146057:-211     | Dap           | PROMOTER               | 0.255                                                        | 0.454                          | 1495.20            | 678.79             | 0.116                          | 1103.09            | 127.77             |
| A_68_P29506061 | chr14:31292780-31292824                           | NM_133761:52       | Dep1a         | INSIDE                 | 0.255                                                        | 0.561                          | 1187.63            | 666.14             | 0.143                          | 937.02             | 134.17             |
| A_68_P27896442 | chr11:69485330-69485374                           | NM_001159375:573   | Eif4a1        | INSIDE                 | 0.255                                                        | 0.633                          | 1529.93            | 969.07             | 0.161                          | 1242.39            | 200.41             |
| A_68_P23973612 | chr5:109123736-109123780                          | NM_001164259:511   | Fgfr1         | INSIDE                 | 0.255                                                        | 0.415                          | 1763.84            | 732.32             | 0.106                          | 1305.41            | 138.36             |
| A_68_P22010772 | chr3:27271476-27271522                            | NM_177330:1226     | Ghsr          | INSIDE                 | 0.255                                                        | 0.502                          | 1159.36            | 581.81             | 0.128                          | 899.87             | 114.94             |
| A_68_P22010765 | chr3:27270773-27270817                            | NM_177330:522      | Ghsr          | INSIDE                 | 0.255                                                        | 0.630                          | 5161.96            | 3250.36            | 0.161                          | 3663.81            | 589.33             |
| A_68_P21569057 | chr2:119151750-119151794                          | NR_030683:161      | Gm14207       | INSIDE                 | 0.255                                                        | 0.672                          | 2166.85            | 1456.50            | 0.172                          | 1612.44            | 276.87             |
| A_68_P30490430 | chr15:101055110-101055154                         | NM_019518:495      | Grasp         | INSIDE                 | 0.255                                                        | 0.420                          | 1458.01            | 612.63             | 0.107                          | 1122.94            | 120.32             |
| A_68_P32016093 | chr19:23217070-23217114                           | NR_035423:-6828    | Mir1192       | PROMOTER               | 0.255                                                        | 0.536                          | 1149.74            | 616.62             | 0.137                          | 952.48             | 130.39             |
| A_68_P21501826 | chr2:106534164-106534208                          | NM_029837:-1571    | Mppd2         | PROMOTER               | 0.255                                                        | 0.694                          | 2711.45            | 1882.62            | 0.177                          | 2027.49            | 358.99             |
| A_68_P32774622 | chrX:155853067-155853111                          | NM_001081124:579   | Mtap7d2       | INSIDE                 | 0.255                                                        | 1.575                          | 2887.48            | 4549.12            | 0.401                          | 1260.64            | 505.77             |
| A_68_P31775848 | chr18:64676151-64676195                           | NM_001142950:39    | Nars          | INSIDE                 | 0.255                                                        | 0.503                          | 1203.13            | 605.41             | 0.129                          | 921.01             | 118.39             |
| A_68_P31099062 | chr17:24833399-24833444                           | NM_027988:243      | Noxo1         | INSIDE                 | 0.255                                                        | 0.530                          | 1205.75            | 639.44             | 0.135                          | 910.91             | 123.16             |
| A_68_P21634174 | chr2:131087984-131088028                          | NM_153501:-229     | Pank2         | PROMOTER               | 0.255                                                        | 0.605                          | 979.32             | 592.66             | 0.154                          | 756.60             | 116.58             |
| A_68_P23720372 | chr5:58111337-58111385                            | NM_018764:2101     | Pedh7         | INSIDE                 | 0.255                                                        | 0.561                          | 1135.39            | 637.20             | 0.143                          | 856.38             | 122.59             |
| A_68_P27898393 | chr11:69810295-69810339                           | NM_030064:1044     | Phf23         | INSIDE                 | 0.255                                                        | 1.753                          | 3199.51            | 5608.95            | 0.446                          | 2134.93            | 952.71             |
| A_68_P26815243 | chr9:108420248-108420296                          | NM_001114119:855   | Qrich1        | INSIDE                 | 0.255                                                        | 0.546                          | 1230.81            | 672.17             | 0.139                          | 896.46             | 124.67             |
| A_68_P21835806 | chr2:167317742-167317786                          | NM_030743:-380     | Rnf114        | PROMOTER               | 0.255                                                        | 0.540                          | 1085.20            | 585.49             | 0.137                          | 883.32             | 121.38             |
| A_68_P31154750 | chr17:34741259-34741304                           | NM_019403:-775     | Rnf5          | DIVERGENT_PROMOTER     | 0.255                                                        | 0.651                          | 2081.62            | 1354.46            | 0.166                          | 1539.66            | 255.00             |
| A_68_P23403479 | chr4:149328561-149328605                          | NM_029035:533      | Spsb1         | INSIDE                 | 0.255                                                        | 0.493                          | 1250.73            | 616.65             | 0.126                          | 927.62             | 116.73             |
| A_68_P23223132 | chr4:114729449-114729493                          | NM_011527:-2661    | Tal1          | PROMOTER               | 0.255                                                        | 0.725                          | 4478.27            | 3247.27            | 0.185                          | 3204.40            | 593.51             |
| A_68_P30498347 | chr15:102349032-102349076                         | NM_009319:378      | Tarbp2        | INSIDE                 | 0.255                                                        | 0.498                          | 1317.88            | 656.61             | 0.127                          | 1019.98            | 129.51             |
| A_68_P27915635 | chr11:72990099-72990143                           | NM_001168470:390   | Tmem93        | INSIDE                 | 0.255                                                        | 0.511                          | 1762.61            | 901.27             | 0.131                          | 1335.15            | 174.41             |
| A_68_P21070651 | chr2:25080168-25080218                            | NM_146116:30       | Tubb2c        | INSIDE                 | 0.255                                                        | 0.536                          | 1514.11            | 810.85             | 0.137                          | 1178.49            | 161.17             |
| A_68_P31204666 | chr17:46168644-46168688                           | NM_001110266:-6554 | Vegfa         | PROMOTER               | 0.255                                                        | 0.501                          | 1374.64            | 688.78             | 0.128                          | 997.78             | 127.64             |
| A_68_P29258380 | chr13:99343921-99343965                           | AK135687:153807    |               | INSIDE                 | 0.255                                                        | 0.664                          | 960.40             | 637.94             | 0.169                          | 747.60             | 126.54             |
| A_68_P29445005 | chr14:20902070-20902114                           | NM_026209:302      | 1810063B07Rik | INSIDE                 | 0.254                                                        | 0.388                          | 1402.98            | 544.17             | 0.099                          | 1187.66            | 117.17             |
| A_68_P25090211 | chr7:52184951-52185005                            | NM_001077264:-118  | Ap2a1         | PROMOTER               | 0.254                                                        | 0.636                          | 1021.77            | 649.55             | 0.162                          | 733.63             | 118.69             |
| A_68_P28183217 | chr11:120094827-120094871                         | NM_198423:588      | Bahcc1        | INSIDE                 | 0.254                                                        | 0.580                          | 1341.64            | 778.34             | 0.147                          | 1091.17            | 160.66             |
| A_68_P27899563 | chr11:70040019-70040063                           | NM_007528:3260     | Bcl6b         | INSIDE                 | 0.254                                                        | 0.592                          | 1588.96            | 941.28             | 0.150                          | 1186.63            | 178.42             |
| A_68_P24641803 | chr6:91827853-91827908                            | NM_172730:-166     | C130022K22Rik | PROMOTER               | 0.254                                                        | 0.523                          | 1199.69            | 627.78             | 0.133                          | 911.33             | 120.90             |
| A_68_P23396586 | chr4:148180019-148180067                          | NM_027195:1542     | Cas2l         | INSIDE                 | 0.254                                                        | 0.482                          | 1461.78            | 704.77             | 0.122                          | 1024.98            | 125.37             |
| A_68_P26035015 | chr8:89994889-89994933                            | NM_019626:1581     | Cbln1         | INSIDE                 | 0.254                                                        | 0.579                          | 1616.71            | 935.56             | 0.147                          | 1169.52            | 171.59             |
| A_68_P27792932 | chr11:51076708-51076752                           | NM_007714:58       | Clk4          | INSIDE                 | 0.254                                                        | 0.692                          | 2234.37            | 1546.28            | 0.175                          | 1465.41            | 257.09             |
| A_68_P24600268 | chr6:84534331-84534375                            | NM_175475:9452     | Cyp26b1       | INSIDE                 | 0.254                                                        | 0.403                          | 1425.21            | 574.31             | 0.102                          | 1140.45            | 116.76             |
| A_68_P26612687 | chr9:69609097-69609152                            | NM_022378:-377     | Foxb1         | PROMOTER               | 0.254                                                        | 0.584                          | 1028.12            | 600.77             | 0.149                          | 776.19             | 115.31             |
| A_68_P30020398 | chr15:12135347-12135391                           | NM_172958:520      | Mtmr12        | INSIDE                 | 0.254                                                        | 0.433                          | 1225.75            | 530.80             | 0.110                          | 1062.33            | 116.77             |
| A_68_P27539157 | chr10:127473205-127473249                         | NM_001113199:825   | Naca          | INSIDE                 | 0.254                                                        | 0.470                          | 1170.38            | 549.74             | 0.119                          | 1011.14            | 120.70             |
| A_68_P28105683 | chr11:107050715-107050759                         | NM_001161329:-41   | Nol11         | PROMOTER               | 0.254                                                        | 0.453                          | 1295.12            | 586.91             | 0.115                          | 1151.89            | 132.70             |
| A_68_P21150007 | chr2:38565998-38566044                            | NM_139051:4042     | Nr5a1         | INSIDE                 | 0.254                                                        | 0.572                          | 1063.30            | 608.59             | 0.145                          | 811.01             | 117.88             |
| A_68_P32134814 | chr19:44910682-44910726                           | NM_011037:78821    | Pax2          | INSIDE                 | 0.254                                                        | 0.557                          | 1819.58            | 1012.69            | 0.141                          | 1503.55            | 212.19             |
| A_68_P21495906 | chr2:105509202-105509246                          | NR_002867:1263     | Pax6os1       | INSIDE                 | 0.254                                                        | 0.687                          | 1818.45            | 1249.49            | 0.175                          | 1512.12            | 264.40             |
| A_68_P31415134 | chr17:86566646-86566690                           | NM_011104:-456     | Prkce         | PROMOTER               | 0.254                                                        | 0.623                          | 1912.25            | 1190.80            | 0.158                          | 1313.18            | 207.50             |
| A_68_P21629885 | chr2:130276440-130276484                          | NM_001163688:449   | Ptpra         | INSIDE                 | 0.254                                                        | 0.453                          | 1365.05            | 618.74             | 0.115                          | 1192.92            | 137.52             |

| ProbeName      | Target position of probe on CpG island microarray | TargetID           | GeneSymbol    | CpG island Description | Ratio of relative methylation (TiO <sub>2</sub> -NP/Vehicle) | Sham group                     |                    |                    | TiO <sub>2</sub> -H group      |                    |                    |
|----------------|---------------------------------------------------|--------------------|---------------|------------------------|--------------------------------------------------------------|--------------------------------|--------------------|--------------------|--------------------------------|--------------------|--------------------|
|                |                                                   |                    |               |                        |                                                              | Relative methylation (Cy5/Cy3) | Cy3 signal (Input) | Cy5 signal (MeDIP) | Relative methylation (Cy5/Cy3) | Cy3 signal (Input) | Cy5 signal (MeDIP) |
| A_68_P25669972 | chr8:13677124-13677168                            | NM_009025:441      | Rasa3         | INSIDE                 | 0.254                                                        | 0.689                          | 2615.30            | 1803.09            | 0.175                          | 1884.79            | 329.83             |
| A_68_P28174642 | chr11:118771162-118771206                         | NM_001024931:-298  | Rbfox3        | PROMOTER               | 0.254                                                        | 0.604                          | 1069.81            | 646.22             | 0.154                          | 769.17             | 118.08             |
| A_68_P28429504 | chr12:52478611-52478655                           | NM_029825:66       | Scfid1        | INSIDE                 | 0.254                                                        | 0.602                          | 1313.85            | 791.57             | 0.153                          | 910.79             | 139.23             |
| A_68_P25950467 | chr8:72736364-72736408                            | NM_001007570:-206  | Sle25a42      | PROMOTER               | 0.254                                                        | 0.717                          | 2209.13            | 1583.69            | 0.182                          | 1728.52            | 314.58             |
| A_68_P20870657 | chr1:181448104-181448148                          | NM_027188:8        | Smyd3         | INSIDE                 | 0.254                                                        | 0.573                          | 1056.77            | 605.15             | 0.146                          | 806.52             | 117.39             |
| A_68_P27569490 | chr11:6525943-6525987                             | NR_034042:-5542    | Snora5c       | PROMOTER               | 0.254                                                        | 0.385                          | 2827.29            | 1088.72            | 0.098                          | 2041.96            | 200.00             |
| A_68_P32415806 | chrX:58146341-58146385                            | NM_009237:243      | Sox3          | INSIDE                 | 0.254                                                        | 2.374                          | 1679.56            | 3986.93            | 0.602                          | 802.85             | 483.50             |
| A_68_P31092273 | chr17:23684002-23684046                           | NM_001033496:17169 | Zfp213        | DOWNSTREAM             | 0.254                                                        | 0.524                          | 1933.43            | 1012.25            | 0.133                          | 1395.18            | 185.18             |
| A_68_P25063497 | chr7:38554739-38554783                            | NM_172385:11       | Zfp536        | INSIDE                 | 0.254                                                        | 0.366                          | 1505.87            | 551.57             | 0.093                          | 1250.12            | 116.48             |
| A_68_P23611134 | chr5:37419319-37419363                            | M30250:624167      |               | INSIDE                 | 0.254                                                        | 0.638                          | 859.27             | 548.15             | 0.162                          | 728.30             | 117.99             |
| A_68_P20304762 | chr1:66863250-66863306                            | NM_001122738:891   | 1110028C15Rik | INSIDE                 | 0.253                                                        | 0.432                          | 1501.38            | 648.86             | 0.109                          | 1084.27            | 118.50             |
| A_68_P27892798 | chr11:68873155-68873199                           | NM_028005:-100     | 2310047M10Rik | PROMOTER               | 0.253                                                        | 0.442                          | 1362.85            | 602.21             | 0.112                          | 1039.25            | 116.22             |
| A_68_P31177904 | chr17:41016953-41016997                           | NM_027834:533      | 9130008F23Rik | INSIDE                 | 0.253                                                        | 0.499                          | 1212.22            | 604.69             | 0.126                          | 944.15             | 119.26             |
| A_68_P20947700 | chr1:194999554-194999598                          | NM_001160360:-86   | A130010J15Rik | PROMOTER               | 0.253                                                        | 0.501                          | 1101.04            | 551.61             | 0.127                          | 906.35             | 114.75             |
| A_68_P27083337 | chr10:40022544-40022597                           | NM_009665:-576     | Amd1          | PROMOTER               | 0.253                                                        | 0.449                          | 1427.78            | 641.68             | 0.114                          | 1062.36            | 120.88             |
| A_68_P27508736 | chr10:121886005-121886049                         | NM_016847:472      | Avpr1a        | INSIDE                 | 0.253                                                        | 0.633                          | 4461.36            | 2822.08            | 0.160                          | 363.78             | 549.54             |
| A_68_P28739140 | chr12:111829834-111829881                         | NR_033340:274      | B930059L03Rik | INSIDE                 | 0.253                                                        | 0.419                          | 1487.94            | 622.74             | 0.106                          | 1104.94            | 116.79             |
| A_68_P27489860 | chr10:118677501-118677545                         | NM_027994:-411     | Cand1         | PROMOTER               | 0.253                                                        | 0.658                          | 1529.32            | 1006.46            | 0.167                          | 1147.21            | 191.22             |
| A_68_P31625483 | chr18:36885784-36885836                           | NM_009841:498      | Cd14          | INSIDE                 | 0.253                                                        | 0.719                          | 1472.57            | 1059.13            | 0.182                          | 1077.95            | 196.04             |
| A_68_P27183507 | chr10:61441706-61441750                           | NM_007731:128      | Col13a1       | INSIDE                 | 0.253                                                        | 0.649                          | 1229.23            | 797.35             | 0.164                          | 762.50             | 125.21             |
| A_68_P31157712 | chr17:35257797-35257841                           | NM_009975:574      | Csnk2b        | INSIDE                 | 0.253                                                        | 0.606                          | 1049.24            | 635.32             | 0.153                          | 839.51             | 128.42             |
| A_68_P27903825 | chr11:70817620-70817664                           | NM_178367:292      | Dhx33         | INSIDE                 | 0.253                                                        | 0.384                          | 2082.91            | 800.73             | 0.097                          | 1763.97            | 171.74             |
| A_68_P23404989 | chr4:149610705-149610749                          | NM_023119:-579     | Eno1          | PROMOTER               | 0.253                                                        | 0.699                          | 4196.06            | 2931.02            | 0.177                          | 3037.00            | 536.56             |
| A_68_P22666539 | chr3:154756237-154756282                          | NM_029330:83       | Fpgt          | INSIDE                 | 0.253                                                        | 0.578                          | 1023.23            | 591.59             | 0.146                          | 824.71             | 120.69             |
| A_68_P20556963 | chr1:121316999-121317043                          | NM_008381:1805     | Inhbb         | INSIDE                 | 0.253                                                        | 0.588                          | 1608.71            | 945.72             | 0.148                          | 1229.97            | 182.62             |
| A_68_P31516119 | chr18:15309151-15309195                           | NM_134112:783      | Ketd1         | INSIDE                 | 0.253                                                        | 0.525                          | 1732.70            | 909.46             | 0.133                          | 1339.55            | 178.14             |
| A_68_P30359737 | chr15:78236916-78236960                           | NM_001162493:-203  | Mpst          | DIVERGENT_PROMOTER     | 0.253                                                        | 0.601                          | 1041.60            | 626.15             | 0.152                          | 787.95             | 119.64             |
| A_68_P31202532 | chr17:45823669-45823714                           | NM_026732:371      | Mrpl14        | INSIDE                 | 0.253                                                        | 0.738                          | 2348.99            | 1732.95            | 0.187                          | 1638.74            | 306.16             |
| A_68_P24591488 | chr6:83059493-83059537                            | NM_026744:413      | Mrpl53        | INSIDE                 | 0.253                                                        | 0.554                          | 992.61             | 550.16             | 0.140                          | 842.28             | 117.95             |
| A_68_P24385094 | chr6:39760759-39760803                            | NM_001010930:155   | Mrps33        | INSIDE                 | 0.253                                                        | 0.499                          | 1094.41            | 546.56             | 0.126                          | 946.97             | 119.67             |
| A_68_P25092691 | chr7:52622936-52622980                            | NR_027802:356      | Mtag2         | INSIDE                 | 0.253                                                        | 0.565                          | 1167.31            | 660.00             | 0.143                          | 844.92             | 120.84             |
| A_68_P32103772 | chr19:38893658-38893702                           | NM_021315:47       | Noc31         | INSIDE                 | 0.253                                                        | 0.551                          | 3680.11            | 2025.94            | 0.139                          | 2647.97            | 368.75             |
| A_68_P27946028 | chr11:78738513-78738557                           | NM_010927:4174     | Nos2          | INSIDE                 | 0.253                                                        | 0.622                          | 1056.79            | 656.90             | 0.157                          | 908.50             | 143.06             |
| A_68_P26268777 | chr8:130882335-130882384                          | NM_008737:-613     | Nrp1          | PROMOTER               | 0.253                                                        | 0.610                          | 995.81             | 607.04             | 0.154                          | 779.14             | 119.94             |
| A_68_P23819019 | chr5:77380180-77380224                            | NM_025939:-233     | Paics         | PROMOTER               | 0.253                                                        | 0.599                          | 2057.85            | 1231.88            | 0.152                          | 1576.69            | 238.91             |
| A_68_P24624715 | chr6:88824256-88824300                            | NM_176973:-240     | Podxl2        | PROMOTER               | 0.253                                                        | 1.524                          | 3710.00            | 5653.87            | 0.385                          | 2664.39            | 1026.48            |
| A_68_P27680413 | chr11:30672528-30672572                           | NM_134013:776      | Psme4         | INSIDE                 | 0.253                                                        | 0.643                          | 816.93             | 525.46             | 0.163                          | 750.05             | 122.16             |
| A_68_P24040029 | chr5:121099253-121099297                          | NM_013832:444      | Rasa11        | INSIDE                 | 0.253                                                        | 0.361                          | 1675.88            | 604.30             | 0.091                          | 1277.89            | 116.66             |
| A_68_P30546792 | chr16:11203231-11203275                           | NM_025546:133      | Rsl1d1        | INSIDE                 | 0.253                                                        | 0.698                          | 2707.74            | 1889.84            | 0.177                          | 2152.81            | 380.38             |
| A_68_P25265270 | chr7:87343737-87343781                            | NM_013659:12032    | Sema4b        | INSIDE                 | 0.253                                                        | 0.604                          | 1204.20            | 726.96             | 0.153                          | 871.69             | 133.15             |
| A_68_P21783925 | chr2:158436516-158436560                          | NM_009508:45       | Slc32a1       | INSIDE                 | 0.253                                                        | 0.622                          | 2370.41            | 1474.89            | 0.158                          | 1913.02            | 301.52             |
| A_68_P25232261 | chr7:81157848-81157892                            | NM_009181:698      | Str8sia2      | INSIDE                 | 0.253                                                        | 0.679                          | 2235.50            | 1518.32            | 0.172                          | 1503.65            | 257.94             |
| A_68_P27682733 | chr11:31271650-31271694                           | NM_011491:-1611    | Ste2          | PROMOTER               | 0.253                                                        | 0.472                          | 1361.46            | 642.53             | 0.120                          | 1033.56            | 123.55             |
| A_68_P25030456 | chr7:31016600-31016644                            | NM_025548:426      | Tbcb          | INSIDE                 | 0.253                                                        | 0.602                          | 1977.07            | 1191.00            | 0.152                          | 1410.42            | 214.77             |
| A_68_P21912031 | chr2:181414879-181414923                          | NM_009326:-114     | Tcea2         | DIVERGENT_PROMOTER     | 0.253                                                        | 0.574                          | 1062.47            | 609.89             | 0.145                          | 804.11             | 116.95             |
| A_68_P24076583 | chr5:127721966-127722010                          | NM_175432:-207     | Tmem132c      | PROMOTER               | 0.253                                                        | 0.405                          | 1679.29            | 680.32             | 0.102                          | 1140.43            | 116.78             |
| A_68_P23316764 | chr4:132833345-132833389                          | NM_025667:339      | Tmem222       | INSIDE                 | 0.253                                                        | 0.501                          | 1394.89            | 698.19             | 0.127                          | 980.37             | 124.30             |
| A_68_P23621602 | chr5:38952317-38952368                            | NM_011715:492      | Wdr1          | INSIDE                 | 0.253                                                        | 0.362                          | 1821.20            | 659.43             | 0.092                          | 1336.12            | 122.32             |
| A_68_P22164429 | chr3:57379088-57379132                            | NM_133784:688      | Wwtr1         | INSIDE                 | 0.253                                                        | 0.664                          | 947.44             | 629.49             | 0.168                          | 774.59             | 130.00             |
| A_68_P25028818 | chr7:30645166-30645210                            | NM_172740:191      | Zfp420        | INSIDE                 | 0.253                                                        | 0.492                          | 1317.60            | 648.40             | 0.124                          | 990.70             | 123.34             |
| A_68_P30402194 | chr15:85500704-85500751                           | AK038224:-6444     |               | PROMOTER               | 0.253                                                        | 0.643                          | 990.62             | 637.04             | 0.163                          | 744.40             | 121.27             |

| ProbeName      | Target position of probe on CpG island microarray | TargetID           | GeneSymbol    | CpG island Description | Ratio of relative methylation (TiO <sub>2</sub> -NP/Vehicle) | Sham group                     |                    |                    | TiO <sub>2</sub> -H group      |                    |                    |
|----------------|---------------------------------------------------|--------------------|---------------|------------------------|--------------------------------------------------------------|--------------------------------|--------------------|--------------------|--------------------------------|--------------------|--------------------|
|                |                                                   |                    |               |                        |                                                              | Relative methylation (Cy5/Cy3) | Cy3 signal (Input) | Cy5 signal (MeDIP) | Relative methylation (Cy5/Cy3) | Cy3 signal (Input) | Cy5 signal (MeDIP) |
| A_68_P27787098 | chr11:49988398-49988442                           | NM_026543:68       | 3010026009Rik | INSIDE                 | 0.252                                                        | 0.670                          | 3617.47            | 2424.19            | 0.169                          | 2600.39            | 438.38             |
| A_68_P23312749 | chr4:132089123-132089167                          | NM_007512:430      | Atp1f1        | INSIDE                 | 0.252                                                        | 0.668                          | 1867.63            | 1247.15            | 0.169                          | 1405.01            | 236.85             |
| A_68_P22859646 | chr4:40894916-40894962                            | NM_001171739:389   | Bag1          | INSIDE                 | 0.252                                                        | 0.438                          | 1370.07            | 600.23             | 0.110                          | 1093.08            | 120.50             |
| A_68_P28976946 | chr13:41344925-41344972                           | NM_001135577:-264  | BC024659      | PROMOTER               | 0.252                                                        | 0.491                          | 1292.73            | 634.97             | 0.124                          | 984.42             | 121.72             |
| A_68_P27176087 | chr10:60148828-60148872                           | NM_023370:10388    | Cdh23         | INSIDE                 | 0.252                                                        | 0.487                          | 1481.03            | 721.42             | 0.123                          | 1021.99            | 125.32             |
| A_68_P21429513 | chr2:92440608-92440652                            | NM_023850:767      | Chst1         | INSIDE                 | 0.252                                                        | 0.689                          | 1515.97            | 1044.00            | 0.173                          | 1107.85            | 192.14             |
| A_68_P25470627 | chr7:127987068-127987112                          | NM_007908:694      | Eef2k         | INSIDE                 | 0.252                                                        | 0.659                          | 1620.71            | 1068.33            | 0.166                          | 1275.93            | 211.57             |
| A_68_P23400758 | chr4:148859457-148859501                          | NM_026963:37       | Lzic          | INSIDE                 | 0.252                                                        | 0.559                          | 1110.84            | 621.30             | 0.141                          | 857.81             | 120.70             |
| A_68_P26022619 | chr8:87437298-87437343                            | NM_019945:23932    | Mast1         | INSIDE                 | 0.252                                                        | 0.612                          | 1223.67            | 748.93             | 0.154                          | 931.22             | 143.43             |
| A_68_P31107425 | chr17:26089202-26089246                           | NM_001039038:-7348 | Nhlrc4        | PROMOTER               | 0.252                                                        | 0.645                          | 1005.11            | 648.02             | 0.163                          | 717.95             | 116.80             |
| A_68_P27903591 | chr11:70783309-70783353                           | NM_001083331:134   | Nup88         | INSIDE                 | 0.252                                                        | 0.561                          | 1888.83            | 1060.44            | 0.142                          | 1364.85            | 193.26             |
| A_68_P23165462 | chr4:102986330-102986374                          | NM_025909:-98      | Oma1          | PROMOTER               | 0.252                                                        | 0.375                          | 1524.11            | 571.70             | 0.094                          | 1250.13            | 117.95             |
| A_68_P20370404 | chr1:78193792-78193836                            | NM_001159520:-103  | Pax3          | PROMOTER               | 0.252                                                        | 0.338                          | 2355.52            | 795.38             | 0.085                          | 2047.23            | 173.97             |
| A_68_P30349852 | chr15:76501941-76501985                           | NM_033371:-147     | Ppp1r16a      | DIVERGENT_PROMOTER     | 0.252                                                        | 0.572                          | 917.75             | 525.14             | 0.144                          | 815.00             | 117.53             |
| A_68_P23575728 | chr5:31262393-31262437                            | NM_016703:320      | Preb          | INSIDE                 | 0.252                                                        | 0.403                          | 2398.80            | 967.07             | 0.102                          | 1849.15            | 187.96             |
| A_68_P26811064 | chr9:107673153-107673200                          | NM_148930:157      | Rbm5          | INSIDE                 | 0.252                                                        | 0.666                          | 1035.06            | 688.89             | 0.168                          | 748.98             | 125.57             |
| A_68_P29294057 | chr13:105844812-105844856                         | NM_029879:176      | Rgs7bp        | INSIDE                 | 0.252                                                        | 0.459                          | 1256.61            | 576.18             | 0.116                          | 1031.29            | 119.37             |
| A_68_P20348981 | chr1:74552352-74552396                            | NM_021383:-259     | Rqcd1         | PROMOTER               | 0.252                                                        | 0.664                          | 2065.16            | 1371.79            | 0.168                          | 1351.71            | 226.66             |
| A_68_P20149045 | chr1:36613770-36613814                            | NM_001126047:1434  | Sema4c        | INSIDE                 | 0.252                                                        | 0.701                          | 1920.32            | 1346.18            | 0.176                          | 1297.88            | 228.83             |
| A_68_P20618601 | chr1:133860103-133860147                          | NM_145977:-7061    | Slc45a3       | PROMOTER               | 0.252                                                        | 0.605                          | 1023.46            | 619.57             | 0.152                          | 844.77             | 128.65             |
| A_68_P28151701 | chr11:115025012-115025056                         | NM_012030:380      | Slc9a3r1      | INSIDE                 | 0.252                                                        | 0.379                          | 1605.23            | 608.54             | 0.095                          | 1196.98            | 114.20             |
| A_68_P32562915 | chrX:98417474-98417518                            | NM_001110311:406   | Snx12         | INSIDE                 | 0.252                                                        | 2.320                          | 2372.61            | 5505.41            | 0.585                          | 1069.45            | 626.07             |
| A_68_P28143023 | chr11:113480461-113480507                         | NM_001042606:-5086 | Sstr2         | PROMOTER               | 0.252                                                        | 0.400                          | 1490.33            | 595.89             | 0.101                          | 1226.66            | 123.47             |
| A_68_P23332904 | chr4:135804629-135804673                          | NM_011542:779      | Tea3          | INSIDE                 | 0.252                                                        | 1.454                          | 8931.15            | 12984.54           | 0.367                          | 6266.69            | 2298.48            |
| A_68_P21765246 | chr2:155207391-155207435                          | NM_178111:-179     | Trp53inp2     | PROMOTER               | 0.252                                                        | 0.659                          | 3385.42            | 2231.52            | 0.166                          | 2563.74            | 425.32             |
| A_68_P20352742 | chr1:75216148-75216195                            | NM_009447:-343     | Tuba4a        | PROMOTER               | 0.252                                                        | 0.615                          | 929.77             | 572.00             | 0.155                          | 785.47             | 121.96             |
| A_68_P30991292 | chr16:96367120-96367164                           | NM_207301:117      | Wrb           | INSIDE                 | 0.252                                                        | 0.677                          | 2934.92            | 1987.61            | 0.171                          | 2052.27            | 350.11             |
| A_68_P24129051 | chr5:138596643-138596687                          | NM_019747:308      | Zfp113        | INSIDE                 | 0.252                                                        | 0.542                          | 1896.16            | 1027.19            | 0.137                          | 1377.73            | 188.16             |
| A_68_P25604012 | chr7:151164433-151164477                          |                    |               | Unknown                | 0.252                                                        | 0.555                          | 3042.67            | 1689.02            | 0.140                          | 2256.88            | 316.20             |
| A_68_P26538531 | chr9:56643513-56643557                            | AK155716:5534      |               | DOWNSTREAM             | 0.252                                                        | 0.550                          | 1531.95            | 842.09             | 0.139                          | 1185.03            | 164.35             |
| A_68_P21866704 | chr2:172765156-172765200                          | NM_007557:616      | Bmp7          | INSIDE                 | 0.251                                                        | 0.617                          | 1113.69            | 687.29             | 0.155                          | 799.62             | 123.96             |
| A_68_P26659373 | chr9:78243366-78243412                            | NM_001191044:-195  | Ddx43         | PROMOTER               | 0.251                                                        | 0.644                          | 883.18             | 569.18             | 0.162                          | 723.28             | 117.06             |
| A_68_P30261328 | chr15:60655675-60655719                           | NM_001162926:939   | Fam84b        | INSIDE                 | 0.251                                                        | 0.662                          | 860.65             | 569.47             | 0.166                          | 705.49             | 117.12             |
| A_68_P22791943 | chr4:25726823-25726867                            | NM_010243:306      | Fut9          | INSIDE                 | 0.251                                                        | 0.613                          | 3352.60            | 2053.88            | 0.154                          | 2601.33            | 399.92             |
| A_68_P24380022 | chr6:38825884-38825928                            | NM_010433:283      | Hipk2         | INSIDE                 | 0.251                                                        | 0.613                          | 909.00             | 556.86             | 0.154                          | 797.67             | 122.74             |
| A_68_P29134823 | chr13:72768727-72768771                           | NM_010574:2323     | Irx2          | INSIDE                 | 0.251                                                        | 0.607                          | 1084.09            | 658.22             | 0.152                          | 791.69             | 120.70             |
| A_68_P22683292 | chr3:157699623-157699667                          | NM_024194:-22      | Lrre40        | DIVERGENT_PROMOTER     | 0.251                                                        | 0.412                          | 2396.71            | 987.11             | 0.103                          | 1828.22            | 188.88             |
| A_68_P24127563 | chr5:138227997-138228041                          | NM_144913:-89      | Mecpe         | DIVERGENT_PROMOTER     | 0.251                                                        | 0.520                          | 1295.01            | 673.71             | 0.131                          | 955.63             | 125.01             |
| A_68_P27992598 | chr11:86922877-86922926                           | NR_029652:-3604    | Mir301        | PROMOTER               | 0.251                                                        | 0.671                          | 913.85             | 613.08             | 0.168                          | 698.71             | 117.62             |
| A_68_P26021884 | chr8:87308434-87308479                            | NM_001081982:15783 | Nfix          | INSIDE                 | 0.251                                                        | 0.402                          | 1616.46            | 649.56             | 0.101                          | 1163.98            | 117.58             |
| A_68_P22422573 | chr3:109946012-109946056                          | NM_001163348:356   | Nting1        | INSIDE                 | 0.251                                                        | 0.544                          | 1642.08            | 893.53             | 0.137                          | 1231.93            | 168.45             |
| A_68_P27970619 | chr11:83112556-83112601                           | NM_134025:-99      | Pex12         | DIVERGENT_PROMOTER     | 0.251                                                        | 0.482                          | 1413.18            | 681.67             | 0.121                          | 991.90             | 120.15             |
| A_68_P32546910 | chrX:94267800-94267844                            | NM_001033361:-112  | Pgr15l        | PROMOTER               | 0.251                                                        | 1.589                          | 842.15             | 1338.09            | 0.399                          | 490.63             | 195.86             |
| A_68_P31084400 | chr17:21082518-21082562                           | NM_016891:123      | Ppp2r1a       | INSIDE                 | 0.251                                                        | 0.523                          | 1275.90            | 667.73             | 0.131                          | 953.66             | 125.31             |
| A_68_P29982086 | chr15:5066083-5066136                             | NM_026069:-503     | Rpl37         | DIVERGENT_PROMOTER     | 0.251                                                        | 0.503                          | 1450.34            | 729.04             | 0.126                          | 1017.12            | 128.52             |
| A_68_P26895475 | chr9:123438639-123438695                          | NM_030692:-333     | Sacm1l        | PROMOTER               | 0.251                                                        | 0.413                          | 1389.88            | 574.54             | 0.104                          | 1135.50            | 117.92             |
| A_68_P25585438 | chr7:148067601-148067645                          | NM_001127351:146   | Sirt3         | INSIDE                 | 0.251                                                        | 0.485                          | 2710.95            | 1314.97            | 0.122                          | 2100.29            | 255.63             |
| A_68_P31926386 | chr19:5024497-5024541                             | NM_007854:513      | Slc29a2       | INSIDE                 | 0.251                                                        | 0.647                          | 910.24             | 589.06             | 0.162                          | 715.85             | 116.11             |
| A_68_P27779981 | chr11:48614053-48614098                           | NR_028563:-1459    | Snord96a      | PROMOTER               | 0.251                                                        | 0.560                          | 1688.88            | 946.06             | 0.141                          | 1321.04            | 185.84             |
| A_68_P30234984 | chr15:55738403-55738447                           | NM_016667:80       | Sntb1         | INSIDE                 | 0.251                                                        | 0.584                          | 1983.17            | 1158.14            | 0.147                          | 1406.89            | 206.35             |
| A_68_P28050111 | chr11:97223439-97223483                           | NM_138657:-404     | Socs7         | PROMOTER               | 0.251                                                        | 0.486                          | 1061.15            | 515.54             | 0.122                          | 1010.41            | 123.40             |

| ProbeName      | Target position of probe on CpG island microarray | TargetID               | GeneSymbol    | CpG island Description | Ratio of relative methylation (TiO <sub>2</sub> -NP/Vehicle) | Sham group                     |                    |                    | TiO <sub>2</sub> -H group      |                    |                    |
|----------------|---------------------------------------------------|------------------------|---------------|------------------------|--------------------------------------------------------------|--------------------------------|--------------------|--------------------|--------------------------------|--------------------|--------------------|
|                |                                                   |                        |               |                        |                                                              | Relative methylation (Cy5/Cy3) | Cy3 signal (Input) | Cy5 signal (MeDIP) | Relative methylation (Cy5/Cy3) | Cy3 signal (Input) | Cy5 signal (MeDIP) |
| A_68_P23012918 | chr4:71861537-71861581                            | NM_011599:395          | Tle1          | INSIDE                 | 0.251                                                        | 0.423                          | 1877.73            | 793.71             | 0.106                          | 1584.44            | 168.14             |
| A_68_P31213635 | chr17:47825554-47825598                           | NM_001164729:-241      | Tomm6         | DIVERGENT_PROMOTER     | 0.251                                                        | 0.696                          | 1225.87            | 852.85             | 0.175                          | 968.48             | 169.39             |
| A_68_P26685860 | chr9:83728064-83728108                            | NM_001110265:-209      | Ttk           | PROMOTER               | 0.251                                                        | 0.642                          | 1466.07            | 941.56             | 0.161                          | 1124.79            | 180.98             |
| A_68_P26817225 | chr9:108838988-108839032                          | NM_025407:350          | Uqcr1         | INSIDE                 | 0.251                                                        | 0.665                          | 1543.53            | 1026.21            | 0.167                          | 1080.27            | 180.40             |
| A_68_P21910759 | chr2:181195175-181195219                          | NM_028125:-1065        | Zbtb46        | PROMOTER               | 0.251                                                        | 0.383                          | 1798.01            | 688.86             | 0.096                          | 1403.35            | 135.02             |
| A_68_P30019880 | chr15:12047515-12047559                           | NM_011767:-69          | Zfr           | PROMOTER               | 0.251                                                        | 0.641                          | 961.01             | 615.57             | 0.161                          | 749.52             | 120.32             |
| A_68_P26451995 | chr9:41698713-41698757                            |                        | Unknown       |                        | 0.251                                                        | 0.666                          | 920.33             | 613.30             | 0.167                          | 714.16             | 119.56             |
| A_68_P31402646 | chr17:84496389-84496433                           | AK043195:199           |               | INSIDE                 | 0.251                                                        | 0.497                          | 1406.98            | 699.32             | 0.125                          | 1048.85            | 130.86             |
| A_68_P26871700 | chr9:119230982-119231026                          | ENSMUST00000128880:436 |               | INSIDE                 | 0.251                                                        | 0.448                          | 2586.88            | 1160.14            | 0.112                          | 1871.62            | 210.54             |
| A_68_P23929548 | chr5:100858327-100858371                          | NR_034038:206          | 5430416N02Rik | INSIDE                 | 0.250                                                        | 0.310                          | 2096.69            | 649.23             | 0.077                          | 1558.90            | 120.54             |
| A_68_P31145426 | chr17:32533638-32533682                           | NR_029458:-6298        | A530088E08Rik | PROMOTER               | 0.250                                                        | 0.616                          | 890.06             | 548.63             | 0.154                          | 770.84             | 118.86             |
| A_68_P30092468 | chr15:27396965-27397009                           | NM_020332:555          | Ank           | INSIDE                 | 0.250                                                        | 0.418                          | 1669.18            | 698.02             | 0.104                          | 1301.10            | 135.88             |
| A_68_P22822463 | chr4:32702764-32702814                            | NM_001122978:341       | Casp8ap2      | INSIDE                 | 0.250                                                        | 0.431                          | 1458.07            | 627.89             | 0.108                          | 1082.94            | 116.47             |
| A_68_P21518697 | chr2:109857970-109858014                          | NM_026613:19           | Ccdc34        | INSIDE                 | 0.250                                                        | 0.385                          | 1651.79            | 636.17             | 0.096                          | 1266.09            | 121.78             |
| A_68_P26542211 | chr9:57368765-57368824                            | NM_007747:-244         | Cox5a         | PROMOTER               | 0.250                                                        | 0.550                          | 940.51             | 517.00             | 0.137                          | 876.65             | 120.48             |
| A_68_P24131511 | chr5:139231842-139231886                          | NM_030565:830          | Fam20c        | INSIDE                 | 0.250                                                        | 0.417                          | 1683.12            | 702.67             | 0.104                          | 1322.25            | 132.25             |
| A_68_P28687868 | chr12:103057400-103057444                         | NM_011812:-157         | Fbln5         | PROMOTER               | 0.250                                                        | 0.451                          | 1263.91            | 570.60             | 0.113                          | 1050.30            | 118.38             |
| A_68_P28563528 | chr12:79327956-79328000                           | NM_145965:337          | Gphn          | INSIDE                 | 0.250                                                        | 0.623                          | 931.00             | 579.71             | 0.156                          | 749.76             | 116.75             |
| A_68_P28154940 | chr11:115569306-115569350                         | NM_008163:583          | Grb2          | INSIDE                 | 0.250                                                        | 0.475                          | 1192.48            | 565.84             | 0.119                          | 986.11             | 116.90             |
| A_68_P24619081 | chr6:87930736-87930780                            | NM_198622:718          | H1fx          | INSIDE                 | 0.250                                                        | 0.348                          | 1708.96            | 594.22             | 0.087                          | 1402.74            | 121.79             |
| A_68_P26954160 | chr10:13686535-13686580                           | NM_010437:373          | Hivep2        | INSIDE                 | 0.250                                                        | 0.364                          | 1693.23            | 616.19             | 0.091                          | 1290.86            | 117.38             |
| A_68_P29614704 | chr14:55483280-55483329                           | NM_001177705:-309      | Homez         | PROMOTER               | 0.250                                                        | 0.504                          | 1164.74            | 586.74             | 0.126                          | 937.73             | 118.15             |
| A_68_P27862287 | chr11:63734368-63734412                           | NM_018805:1396         | Hs3st3b1      | INSIDE                 | 0.250                                                        | 0.540                          | 1175.52            | 634.46             | 0.135                          | 884.21             | 119.39             |
| A_68_P22728834 | chr4:11181339-11181383                            | NM_178112:46           | Ints8         | INSIDE                 | 0.250                                                        | 0.522                          | 1918.88            | 1001.82            | 0.130                          | 1572.92            | 205.05             |
| A_68_P22403738 | chr3:106839716-106839760                          | NM_008418:659          | Kena3         | INSIDE                 | 0.250                                                        | 0.358                          | 1902.64            | 680.64             | 0.089                          | 1325.33            | 118.41             |
| A_68_P30363244 | chr15:78758585-78758629                           | NM_008495:1452         | Lgals1        | INSIDE                 | 0.250                                                        | 0.499                          | 1257.39            | 627.81             | 0.125                          | 961.17             | 120.08             |
| A_68_P25535615 | chr7:139802512-139802556                          | NM_029609:209          | Lhpp          | INSIDE                 | 0.250                                                        | 0.677                          | 1632.46            | 1104.72            | 0.169                          | 1279.92            | 216.22             |
| A_68_P22661991 | chr3:153992609-153992654                          | NM_010713:893          | Lhx8          | INSIDE                 | 0.250                                                        | 0.520                          | 1089.44            | 566.10             | 0.130                          | 925.76             | 120.41             |
| A_68_P25376177 | chr7:109082594-109082648                          | NM_001162973:-249      | Lrre51        | PROMOTER               | 0.250                                                        | 0.657                          | 1623.44            | 1066.72            | 0.164                          | 1236.97            | 202.92             |
| A_68_P24137287 | chr5:140212019-140212063                          | NM_174850:247          | Micall2       | INSIDE                 | 0.250                                                        | 0.440                          | 2339.67            | 1029.16            | 0.110                          | 1809.68            | 198.77             |
| A_68_P26641837 | chr9:74919720-74919769                            | NM_010864:732          | Myo5a         | INSIDE                 | 0.250                                                        | 0.452                          | 1553.93            | 701.83             | 0.113                          | 1136.12            | 128.18             |
| A_68_P25144265 | chr7:63217530-63217574                            | NM_023647:268          | Nipa2         | INSIDE                 | 0.250                                                        | 0.567                          | 979.05             | 554.68             | 0.142                          | 867.32             | 122.89             |
| A_68_P22898179 | chr4:48059988-48060034                            | NM_015743:-4109        | Nr4a3         | PROMOTER               | 0.250                                                        | 0.586                          | 1083.45            | 634.62             | 0.147                          | 834.97             | 122.48             |
| A_68_P26268785 | chr8:130883347-130883403                          | NM_008737:402          | Nrp1          | INSIDE                 | 0.250                                                        | 0.516                          | 1285.24            | 663.39             | 0.129                          | 895.01             | 115.67             |
| A_68_P25576662 | chr7:146434859-146434912                          | NM_001033206:505       | Pwmp2b        | INSIDE                 | 0.250                                                        | 0.548                          | 1233.31            | 676.32             | 0.137                          | 886.07             | 121.68             |
| A_68_P20378194 | chr1:79855540-79855584                            | NM_009255:-322         | Serpine2      | PROMOTER               | 0.250                                                        | 0.599                          | 1703.55            | 1020.23            | 0.150                          | 1455.57            | 218.36             |
| A_68_P25994483 | chr8:81923506-81923561                            | NM_008539:-166         | Smad1         | PROMOTER               | 0.250                                                        | 0.535                          | 1100.58            | 588.80             | 0.134                          | 899.64             | 120.24             |
| A_68_P26237919 | chr8:125626230-125626274                          | NR_028128:-705         | Snord68       | PROMOTER               | 0.250                                                        | 0.303                          | 2213.47            | 670.78             | 0.076                          | 1631.05            | 123.52             |
| A_68_P22049389 | chr3:34549058-34549109                            | NM_011443:157          | Sox2          | INSIDE                 | 0.250                                                        | 0.374                          | 1498.19            | 560.90             | 0.094                          | 1236.66            | 115.88             |
| A_68_P24331348 | chr6:30254521-30254565                            | NM_001169576:-3        | Ube2h         | PROMOTER               | 0.250                                                        | 0.632                          | 978.60             | 618.42             | 0.158                          | 768.99             | 121.58             |
| A_68_P25769987 | chr8:34752626-34752684                            | NM_178648:-206         | Ubxn8         | PROMOTER               | 0.250                                                        | 0.593                          | 977.36             | 580.01             | 0.148                          | 796.30             | 117.94             |
| A_68_P20880189 | chr11:183141032-183141076                         | NM_145514:1055         | Wdr26         | INSIDE                 | 0.250                                                        | 0.475                          | 1247.65            | 593.23             | 0.119                          | 978.33             | 116.08             |
| A_68_P28084545 | chr11:103173341-103173385                         |                        | Unknown       |                        | 0.250                                                        | 0.687                          | 1559.37            | 1071.09            | 0.172                          | 1243.85            | 214.00             |
| A_68_P24475723 | chr6:56518661-56518705                            |                        | Unknown       |                        | 0.250                                                        | 0.573                          | 1022.89            | 585.65             | 0.143                          | 813.71             | 116.49             |
| A_68_P30138905 | chr15:36426080-36426131                           | NM_175134:441          | Ankrd46       | INSIDE                 | 0.249                                                        | 0.446                          | 1354.38            | 603.41             | 0.111                          | 1065.59            | 118.07             |
| A_68_P31380056 | chr17:80295692-80295741                           | NM_178050:-253         | Atf2          | PROMOTER               | 0.249                                                        | 0.670                          | 1582.53            | 1060.85            | 0.167                          | 1146.29            | 190.96             |
| A_68_P25007799 | chr7:25790496-25790540                            | NM_144921:396          | Atp1a3        | INSIDE                 | 0.249                                                        | 0.699                          | 4545.61            | 3177.14            | 0.174                          | 3043.34            | 530.46             |
| A_68_P25011291 | chr7:26466045-26466089                            | NM_172148:-110         | B9d2          | DIVERGENT_PROMOTER     | 0.249                                                        | 0.494                          | 1170.17            | 577.54             | 0.123                          | 1002.37            | 123.37             |
| A_68_P20408509 | chr1:87690854-87690908                            | NM_133781:859          | Cab39         | INSIDE                 | 0.249                                                        | 0.498                          | 1087.17            | 541.31             | 0.124                          | 936.15             | 116.20             |
| A_68_P27089717 | chr10:41238672-41238716                           | NM_016898:-611         | Cd164         | PROMOTER               | 0.249                                                        | 0.416                          | 1409.04            | 586.62             | 0.104                          | 1189.80            | 123.24             |
| A_68_P22355189 | chr3:97413826-97413870                            | NM_026539:265          | Chd11         | INSIDE                 | 0.249                                                        | 0.549                          | 1079.94            | 592.37             | 0.137                          | 976.17             | 133.40             |

| ProbeName      | Target position of probe on CpG island microarray | TargetID            | GeneSymbol    | CpG island Description | Ratio of relative methylation (TiO <sub>2</sub> -NP/Vehicle) | Sham group                     |                    |                    | TiO <sub>2</sub> -H group      |                    |                    |
|----------------|---------------------------------------------------|---------------------|---------------|------------------------|--------------------------------------------------------------|--------------------------------|--------------------|--------------------|--------------------------------|--------------------|--------------------|
|                |                                                   |                     |               |                        |                                                              | Relative methylation (Cy5/Cy3) | Cy3 signal (Input) | Cy5 signal (MeDIP) | Relative methylation (Cy5/Cy3) | Cy3 signal (Input) | Cy5 signal (MeDIP) |
| A_68_P21320136 | chr2:71384105-71384149                            | NM_010054:685       | Dlx2          | INSIDE                 | 0.249                                                        | 0.479                          | 2446.96            | 1171.31            | 0.119                          | 1782.62            | 212.75             |
| A_68_P26659601 | chr9:78290277-78290323                            | NM_173386:654       | E330016A19Rik | INSIDE                 | 0.249                                                        | 0.541                          | 1557.65            | 842.83             | 0.135                          | 1237.15            | 166.67             |
| A_68_P24123511 | chr5:137358417-137358461                          | NM_024474:539       | Emid2         | INSIDE                 | 0.249                                                        | 1.441                          | 6966.42            | 10040.89           | 0.358                          | 4715.86            | 1690.59            |
| A_68_P23440271 | chr4:155109205-155109249                          | NM_001101506:314    | Gm5151        | INSIDE                 | 0.249                                                        | 0.664                          | 1431.11            | 950.82             | 0.165                          | 978.84             | 161.92             |
| A_68_P20451403 | chr1:94728878-94728922                            | NM_016696:638       | Gpc1          | INSIDE                 | 0.249                                                        | 0.530                          | 1071.57            | 568.12             | 0.132                          | 880.34             | 116.38             |
| A_68_P20636647 | chr1:136884516-136884560                          | NM_001033409:117315 | Lgr6          | INSIDE                 | 0.249                                                        | 0.558                          | 1194.18            | 665.95             | 0.139                          | 948.90             | 131.66             |
| A_68_P31930913 | chr19:5803254-5803298                             | NR_002847:-605      | Malat1        | PROMOTER               | 0.249                                                        | 0.365                          | 1861.18            | 679.93             | 0.091                          | 1271.31            | 115.83             |
| A_68_P20348304 | chr1:74438995-74439039                            | NR_029743:-1867     | Mir26b        | PROMOTER               | 0.249                                                        | 0.593                          | 1025.19            | 607.94             | 0.148                          | 823.03             | 121.73             |
| A_68_P26075858 | chr8:96696472-96696516                            | NM_008630:-23       | Mt2           | PROMOTER               | 0.249                                                        | 0.518                          | 1334.06            | 691.64             | 0.129                          | 1082.89            | 139.77             |
| A_68_P28566639 | chr12:80013104-80013148                           | NM_013738:-5201     | Plek2         | PROMOTER               | 0.249                                                        | 0.622                          | 1004.53            | 624.80             | 0.155                          | 860.67             | 133.32             |
| A_68_P25089727 | chr7:52112663-52112707                            | NM_021549:134       | Pnkp          | INSIDE                 | 0.249                                                        | 0.428                          | 1476.56            | 631.94             | 0.106                          | 1097.26            | 116.85             |
| A_68_P24984112 | chr7:17532039-17532083                            | NM_001099636:2030   | Pnmal2        | INSIDE                 | 0.249                                                        | 0.542                          | 1291.60            | 700.57             | 0.135                          | 1078.49            | 145.47             |
| A_68_P25587466 | chr7:148401511-148401555                          | NM_025886:-226      | Rassf7        | DIVERGENT_PROMOTER     | 0.249                                                        | 0.482                          | 3154.33            | 1521.92            | 0.120                          | 1867.66            | 224.16             |
| A_68_P21704900 | chr2:143837439-143837493                          | NM_024281:-467      | Rrbp1         | PROMOTER               | 0.249                                                        | 0.608                          | 879.19             | 534.45             | 0.151                          | 813.55             | 123.01             |
| A_68_P27942191 | chr11:78059485-78059537                           | NM_009143:263       | Sdf2          | INSIDE                 | 0.249                                                        | 0.519                          | 1254.55            | 650.62             | 0.129                          | 936.65             | 120.74             |
| A_68_P28535273 | chr12:74147578-74147622                           | NM_009189:99        | Six1          | INSIDE                 | 0.249                                                        | 0.691                          | 1666.59            | 1152.26            | 0.172                          | 1355.58            | 233.54             |
| A_68_P31412149 | chr17:86091406-86091450                           | NM_011380:-3834     | Six2          | PROMOTER               | 0.249                                                        | 0.609                          | 942.97             | 574.15             | 0.152                          | 787.60             | 119.40             |
| A_68_P22392373 | chr3:104443206-104443250                          | NM_009196:638       | Slc16a1       | INSIDE                 | 0.249                                                        | 0.452                          | 1320.86            | 596.50             | 0.112                          | 1091.23            | 122.48             |
| A_68_P28159860 | chr11:116394577-116394621                         | NM_011451:-1455     | Sphk1         | PROMOTER               | 0.249                                                        | 0.421                          | 1380.55            | 581.67             | 0.105                          | 1138.93            | 119.52             |
| A_68_P20151298 | chr1:36995764-36995812                            | NM_018872:584       | Tmem131       | INSIDE                 | 0.249                                                        | 0.669                          | 936.42             | 626.07             | 0.166                          | 709.28             | 117.87             |
| A_68_P23928043 | chr5:100587765-100587824                          | NM_182841:1033      | Tmem150c      | INSIDE                 | 0.249                                                        | 0.482                          | 1184.56            | 570.70             | 0.120                          | 965.70             | 115.97             |
| A_68_P23141222 | chr4:98590182-98590226                            | NM_146144:-296      | Usp1          | PROMOTER               | 0.249                                                        | 0.389                          | 2799.55            | 1088.64            | 0.097                          | 1963.66            | 190.30             |
| A_68_P25505911 | chr7:134655737-134655781                          | NR_024331:625       | 1700008J07Rik | INSIDE                 | 0.248                                                        | 0.511                          | 1287.65            | 658.42             | 0.127                          | 1048.62            | 133.01             |
| A_68_P30350785 | chr15:76648219-76648263                           | NM_001168288:360    | Arhgap39      | INSIDE                 | 0.248                                                        | 1.361                          | 6207.90            | 8446.78            | 0.337                          | 4429.15            | 1492.51            |
| A_68_P23440848 | chr4:155205726-155205770                          | NM_025338:-6        | Aurkaip1      | PROMOTER               | 0.248                                                        | 0.382                          | 1957.60            | 747.37             | 0.095                          | 1497.45            | 141.64             |
| A_68_P29033454 | chr13:51740459-51740503                           | NM_025415:-120      | Cks2          | PROMOTER               | 0.248                                                        | 0.666                          | 2797.00            | 1862.94            | 0.165                          | 1960.06            | 323.12             |
| A_68_P31157716 | chr7:35258201-35258245                            | NM_009975:170       | Csnk2b        | INSIDE                 | 0.248                                                        | 0.679                          | 3573.03            | 2425.02            | 0.168                          | 2515.84            | 423.30             |
| A_68_P23262660 | chr4:123089459-123089503                          | NM_001167918:-326   | D830031N03Rik | PROMOTER               | 0.248                                                        | 0.563                          | 1842.75            | 1037.08            | 0.140                          | 1442.59            | 201.73             |
| A_68_P25783726 | chr8:37158263-37158317                            | NM_172911:409       | D8Ert82e      | INSIDE                 | 0.248                                                        | 0.643                          | 896.11             | 575.93             | 0.159                          | 750.27             | 119.60             |
| A_68_P23203726 | chr4:109650077-109650121                          | NM_172296:-531      | Dmrt2         | PROMOTER               | 0.248                                                        | 0.348                          | 1771.24            | 616.01             | 0.086                          | 1394.98            | 120.09             |
| A_68_P25957394 | chr8:74067191-74067235                            | NM_028617:384       | Fam125a       | INSIDE                 | 0.248                                                        | 1.361                          | 4553.28            | 6199.19            | 0.337                          | 2935.43            | 989.97             |
| A_68_P23195773 | chr4:108056312-108056356                          | NM_001099303:-380   | Fam159a       | PROMOTER               | 0.248                                                        | 0.608                          | 882.16             | 535.92             | 0.151                          | 768.56             | 116.00             |
| A_68_P27662609 | chr11:26287534-26287589                           | NM_025923:478       | Fanel1        | INSIDE                 | 0.248                                                        | 0.539                          | 1119.39            | 603.35             | 0.134                          | 880.25             | 117.62             |
| A_68_P28157764 | chr11:116029125-116029181                         | NM_172571:340       | Fbf1          | INSIDE                 | 0.248                                                        | 0.665                          | 897.83             | 597.17             | 0.165                          | 722.58             | 119.30             |
| A_68_P23968407 | chr5:108150057-108150101                          | NM_010278:3285      | Gfi1          | INSIDE                 | 0.248                                                        | 0.524                          | 1114.27            | 583.38             | 0.130                          | 902.75             | 117.05             |
| A_68_P29856567 | chr14:102128847-102128891                         | NM_201529:-276      | Lmo7          | PROMOTER               | 0.248                                                        | 0.566                          | 1138.18            | 644.40             | 0.140                          | 966.86             | 135.63             |
| A_68_P26159871 | chr8:112472495-112472551                          | NM_212447:13583     | Marveld3      | INSIDE                 | 0.248                                                        | 0.444                          | 1317.34            | 585.43             | 0.110                          | 1064.82            | 117.42             |
| A_68_P25092688 | chr7:52622594-52622638                            | NR_027802:14        | Mtag2         | INSIDE                 | 0.248                                                        | 0.424                          | 2052.66            | 870.38             | 0.105                          | 1640.76            | 172.55             |
| A_68_P25806929 | chr8:41719873-41719917                            | NM_001040699:252    | Mtmr7         | INSIDE                 | 0.248                                                        | 0.666                          | 1759.44            | 1172.43            | 0.166                          | 1171.81            | 193.98             |
| A_68_P30567338 | chr16:15863650-15863696                           | NM_029354:-257      | Mzt2          | PROMOTER               | 0.248                                                        | 0.550                          | 1210.20            | 665.90             | 0.137                          | 876.81             | 119.89             |
| A_68_P20285508 | chr1:63223074-63223120                            | NM_001160038:300    | Ndufs1        | INSIDE                 | 0.248                                                        | 0.586                          | 1008.39            | 591.00             | 0.145                          | 822.94             | 119.39             |
| A_68_P31655264 | chr18:42554220-42554264                           | NM_138945:-8        | Pou4f3        | PROMOTER               | 0.248                                                        | 0.516                          | 2157.75            | 1113.05            | 0.128                          | 1627.84            | 208.28             |
| A_68_P31921669 | chr19:4192588-4192632                             | NM_031868:437       | Ppp1ca        | INSIDE                 | 0.248                                                        | 0.333                          | 1914.53            | 638.15             | 0.083                          | 1396.65            | 115.60             |
| A_68_P24066363 | chr5:125821560-125821604                          | NM_001205082:-118   | Scarb1        | PROMOTER               | 0.248                                                        | 2.001                          | 3253.79            | 6510.19            | 0.497                          | 1989.18            | 988.87             |
| A_68_P21749116 | chr2:152222489-152222533                          | NM_011438:1272      | Sox12         | INSIDE                 | 0.248                                                        | 0.715                          | 1820.46            | 1302.14            | 0.178                          | 1253.43            | 222.55             |
| A_68_P26421279 | chr9:35018970-35019014                            | NM_026130:205       | Srpr          | INSIDE                 | 0.248                                                        | 0.458                          | 1282.93            | 587.07             | 0.113                          | 1084.90            | 123.11             |
| A_68_P23322939 | chr4:134024154-134024198                          | NM_019641:-58       | Stmn1         | PROMOTER               | 0.248                                                        | 0.677                          | 1098.48            | 743.38             | 0.168                          | 909.59             | 152.39             |
| A_68_P26921705 | chr10:7675095-7675141                             | NM_138667:803       | Tab2          | INSIDE                 | 0.248                                                        | 0.490                          | 1294.80            | 634.17             | 0.121                          | 1001.60            | 121.49             |
| A_68_P23223128 | chr4:114729001-114729045                          | NM_011527:-3109     | Tal1          | PROMOTER               | 0.248                                                        | 0.628                          | 2838.27            | 1782.73            | 0.156                          | 2026.60            | 315.49             |
| A_68_P27693368 | chr11:33104357-33104401                           | NM_019916:-790      | Tlx3          | PROMOTER               | 0.248                                                        | 0.378                          | 1811.26            | 684.73             | 0.094                          | 1335.83            | 125.43             |
| A_68_P24629441 | chr6:89594015-89594059                            | NM_001178058:55     | Txnrd3        | INSIDE                 | 0.248                                                        | 0.656                          | 1009.04            | 662.17             | 0.163                          | 805.31             | 131.26             |

| ProbeName      | Target position of probe on CpG island microarray | TargetID                 | GeneSymbol    | CpG island Description | Ratio of relative methylation (TiO <sub>2</sub> -NP/Vehicle) | Sham group                     |                    |                    | TiO <sub>2</sub> -H group      |                    |                    |
|----------------|---------------------------------------------------|--------------------------|---------------|------------------------|--------------------------------------------------------------|--------------------------------|--------------------|--------------------|--------------------------------|--------------------|--------------------|
|                |                                                   |                          |               |                        |                                                              | Relative methylation (Cy5/Cy3) | Cy3 signal (Input) | Cy5 signal (MeDIP) | Relative methylation (Cy5/Cy3) | Cy3 signal (Input) | Cy5 signal (MeDIP) |
| A_68_P29052391 | chr13:55057276-55057320                           | NM_153131:6506           | Unc5a         | INSIDE                 | 0.248                                                        | 0.494                          | 1243.66            | 614.83             | 0.123                          | 944.51             | 115.98             |
| A_68_P30401593 | chr15:85408317-85408361                           | NM_001163634:162         | Wnt7b         | INSIDE                 | 0.248                                                        | 0.484                          | 1858.71            | 898.85             | 0.120                          | 1460.05            | 174.80             |
| A_68_P21721820 | chr2:146839259-146839303                          | NM_011917:485            | Xm2           | INSIDE                 | 0.248                                                        | 0.466                          | 1205.21            | 562.07             | 0.116                          | 1026.95            | 118.86             |
| A_68_P26139674 | chr8:108939165-108939209                          | NM_011764:-52            | Zfp90         | PROMOTER               | 0.248                                                        | 0.631                          | 2362.80            | 1491.34            | 0.157                          | 1857.77            | 291.06             |
| A_68_P30925087 | chr16:84703818-84703862                           | ENSMUST00000164314:-9427 |               | PROMOTER               | 0.248                                                        | 0.742                          | 2928.84            | 2174.37            | 0.184                          | 2201.12            | 405.36             |
| A_68_P23396591 | chr4:148180645-148180689                          | NM_027195:2166           | Cas21         | INSIDE                 | 0.247                                                        | 0.605                          | 1078.19            | 652.15             | 0.150                          | 851.78             | 127.34             |
| A_68_P25009415 | chr7:26066798-26066842                            | NM_001110131:-377        | Cic           | PROMOTER               | 0.247                                                        | 0.707                          | 2165.51            | 1531.25            | 0.174                          | 1462.29            | 255.03             |
| A_68_P30431381 | chr15:90509463-90509507                           | NM_025815:335            | Cpne8         | INSIDE                 | 0.247                                                        | 0.574                          | 2229.14            | 1279.68            | 0.142                          | 1778.65            | 251.86             |
| A_68_P27564954 | chr11:5688709-5688754                             | NM_001146308:246         | Dbn1          | INSIDE                 | 0.247                                                        | 0.504                          | 2049.45            | 1033.33            | 0.124                          | 1644.25            | 204.69             |
| A_68_P23312760 | chr4:132091448-132091492                          | NM_172400:-3             | Dnajc8        | DIVERGENT_PROMOTER     | 0.247                                                        | 0.429                          | 1410.70            | 604.57             | 0.106                          | 1177.90            | 124.69             |
| A_68_P22149159 | chr3:54496467-54496512                            | NM_019995:-537           | Fam48a        | PROMOTER               | 0.247                                                        | 0.598                          | 930.57             | 556.52             | 0.148                          | 797.22             | 117.81             |
| A_68_P21374843 | chr2:80287482-80287526                            | NM_011356:49             | Frzb          | INSIDE                 | 0.247                                                        | 0.517                          | 1865.58            | 964.17             | 0.127                          | 1511.34            | 192.69             |
| A_68_P30655031 | chr16:32877641-32877685                           | NM_001159349:-207        | Fyttl1        | DIVERGENT_PROMOTER     | 0.247                                                        | 0.679                          | 999.43             | 678.38             | 0.168                          | 908.31             | 152.40             |
| A_68_P24743884 | chr6:110595643-110595687                          | NM_177328:73             | Grm7          | INSIDE                 | 0.247                                                        | 0.626                          | 3444.15            | 2155.10            | 0.155                          | 2719.05            | 420.72             |
| A_68_P21489522 | chr2:10433335-104333384                           | NM_001145824:1287        | Hipk3         | INSIDE                 | 0.247                                                        | 0.551                          | 1078.04            | 593.61             | 0.136                          | 855.10             | 116.07             |
| A_68_P24449304 | chr6:52184811-52184855                            | NM_008263:106            | Hoxa10        | INSIDE                 | 0.247                                                        | 0.543                          | 1273.12            | 691.07             | 0.134                          | 892.55             | 119.90             |
| A_68_P23298316 | chr4:129418783-129418827                          | NM_011317:722            | Khdrbs1       | INSIDE                 | 0.247                                                        | 0.445                          | 1345.62            | 599.40             | 0.110                          | 1156.77            | 127.12             |
| A_68_P27284095 | chr10:80039472-80039516                           | NM_078477:547            | Klfl6         | INSIDE                 | 0.247                                                        | 0.599                          | 1082.35            | 648.75             | 0.148                          | 850.10             | 125.90             |
| A_68_P28052727 | chr11:97661201-97661245                           | NM_010688:237            | Laspl         | INSIDE                 | 0.247                                                        | 0.663                          | 921.86             | 611.42             | 0.164                          | 725.01             | 118.93             |
| A_68_P25972026 | chr8:77633688-77633732                            | NM_008566:284            | Mcm5          | INSIDE                 | 0.247                                                        | 0.479                          | 1134.94            | 543.88             | 0.118                          | 977.78             | 115.69             |
| A_68_P24129162 | chr5:138612940-138612988                          | NR_029658:-5918          | Mir106b       | PROMOTER               | 0.247                                                        | 0.478                          | 1434.04            | 685.99             | 0.118                          | 1050.23            | 124.18             |
| A_68_P24591483 | chr6:83058946-83058997                            | NM_026744:-130           | Mrpl53        | PROMOTER               | 0.247                                                        | 0.554                          | 1065.49            | 590.41             | 0.137                          | 862.94             | 117.92             |
| A_68_P27290096 | chr10:80959275-80959319                           | NM_134009:-188           | Neln          | PROMOTER               | 0.247                                                        | 0.505                          | 1653.89            | 834.60             | 0.125                          | 1263.69            | 157.70             |
| A_68_P23134317 | chr4:97439073-97439121                            | NM_001122953:-5220       | Nfia          | PROMOTER               | 0.247                                                        | 1.496                          | 979.20             | 1464.48            | 0.370                          | 748.59             | 276.95             |
| A_68_P21351535 | chr2:76485641-76485685                            | NM_011871:389            | Prkra         | INSIDE                 | 0.247                                                        | 0.492                          | 1386.02            | 682.37             | 0.122                          | 1100.87            | 134.11             |
| A_68_P31107662 | chr17:26122929-26122973                           | NM_153140:35855          | Rab11fip3     | DOWNSTREAM             | 0.247                                                        | 0.499                          | 1311.97            | 654.16             | 0.123                          | 948.80             | 116.92             |
| A_68_P31412111 | chr17:86086474-86086527                           | NM_011380:1094           | Six2          | INSIDE                 | 0.247                                                        | 0.516                          | 1216.26            | 627.03             | 0.127                          | 937.53             | 119.16             |
| A_68_P28186322 | chr11:120575013-120575057                         | NM_016665:47             | Stral3        | INSIDE                 | 0.247                                                        | 0.477                          | 2062.63            | 984.56             | 0.118                          | 1300.03            | 153.53             |
| A_68_P23223130 | chr4:114729210-114729264                          | NM_011527:-2895          | Tal1          | PROMOTER               | 0.247                                                        | 0.599                          | 1091.58            | 653.85             | 0.148                          | 812.11             | 120.04             |
| A_68_P26082617 | chr8:97844517-97844561                            | NM_028532:9026           | Tepp          | INSIDE                 | 0.247                                                        | 0.715                          | 3769.19            | 2693.51            | 0.176                          | 2829.49            | 499.21             |
| A_68_P27854525 | chr11:62364572-62364616                           | NM_011664:-411           | Ubb           | PROMOTER               | 0.247                                                        | 0.331                          | 1984.84            | 657.46             | 0.082                          | 1445.63            | 118.38             |
| A_68_P24973050 | chr7:13388889-13388933                            | NM_026046:15299          | Zfp329        | DOWNSTREAM             | 0.247                                                        | 0.691                          | 1425.62            | 984.65             | 0.171                          | 1036.10            | 176.71             |
| A_68_P28736912 | chr12:111426508-111426561                         | AK044800:749             |               | INSIDE                 | 0.247                                                        | 0.649                          | 1077.99            | 699.40             | 0.160                          | 747.68             | 119.81             |
| A_68_P24938724 | chr6:148160617-148160668                          | NR_015615:-167           | 4732416N19Rik | PROMOTER               | 0.246                                                        | 0.544                          | 1132.18            | 616.32             | 0.134                          | 902.71             | 120.87             |
| A_68_P23693366 | chr5:52581910-52581954                            | NR_015537:13             | 9230114K14Rik | INSIDE                 | 0.246                                                        | 0.669                          | 895.12             | 599.22             | 0.164                          | 748.74             | 123.07             |
| A_68_P26074969 | chr8:96535449-96535505                            | NM_011787:1064           | Amfr          | INSIDE                 | 0.246                                                        | 0.415                          | 1454.74            | 603.24             | 0.102                          | 1137.19            | 115.91             |
| A_68_P24995363 | chr7:20395100-20395149                            | NM_033601:12980          | Bcl3          | INSIDE                 | 0.246                                                        | 0.482                          | 1232.37            | 593.66             | 0.118                          | 1010.24            | 119.59             |
| A_68_P28331590 | chr12:32183836-32183892                           | NM_134048:541            | Cbll1         | INSIDE                 | 0.246                                                        | 0.561                          | 1151.20            | 645.59             | 0.138                          | 906.59             | 125.16             |
| A_68_P30486141 | chr15:100325298-100325342                         | NM_153407:350            | Csrmp2        | INSIDE                 | 0.246                                                        | 0.656                          | 3590.26            | 2354.78            | 0.161                          | 2892.42            | 466.83             |
| A_68_P29659271 | chr14:63741571-63741615                           | NM_007798:291            | Ctsb          | INSIDE                 | 0.246                                                        | 0.642                          | 871.04             | 559.29             | 0.158                          | 729.97             | 115.21             |
| A_68_P26584123 | chr9:64659420-64659464                            | NM_001162917:625         | Dennd4a       | INSIDE                 | 0.246                                                        | 0.637                          | 3599.08            | 2292.08            | 0.157                          | 2799.30            | 438.41             |
| A_68_P23416686 | chr4:151500208-151500252                          | NM_019585:2804           | Espn          | INSIDE                 | 0.246                                                        | 0.673                          | 2026.10            | 1363.71            | 0.166                          | 1552.55            | 257.45             |
| A_68_P31615543 | chr18:35091590-35091634                           | NM_144866:45             | Etf1          | INSIDE                 | 0.246                                                        | 0.471                          | 1215.83            | 572.78             | 0.116                          | 1023.61            | 118.81             |
| A_68_P29712961 | chr14:72932323-72932367                           | NM_207636:177466         | Fndc3a        | DOWNSTREAM             | 0.246                                                        | 0.458                          | 1223.38            | 559.76             | 0.113                          | 1044.89            | 117.72             |
| A_68_P27897193 | chr11:69617732-69617776                           | NR_027913:584            | G630025P09Rik | INSIDE                 | 0.246                                                        | 0.603                          | 3433.80            | 2070.82            | 0.148                          | 2527.28            | 374.87             |
| A_68_P25011771 | chr7:26540127-26540178                            | NM_144922:-413           | Hnrnpul1      | PROMOTER               | 0.246                                                        | 0.490                          | 1203.20            | 590.03             | 0.121                          | 1059.53            | 127.76             |
| A_68_P24284108 | chr6:21165672-21165716                            | NM_019697:-414           | Kend2         | PROMOTER               | 0.246                                                        | 0.424                          | 1480.99            | 627.38             | 0.104                          | 1327.55            | 138.59             |
| A_68_P22201239 | chr3:65462965-65463009                            | NM_001166659:-7163       | Lekr1         | PROMOTER               | 0.246                                                        | 0.638                          | 1854.25            | 1182.19            | 0.157                          | 1453.43            | 228.11             |
| A_68_P20440038 | chr1:92949235-92949279                            | NM_001111311:-764        | Lrrfip1       | PROMOTER               | 0.246                                                        | 0.534                          | 1239.90            | 662.04             | 0.132                          | 1002.65            | 131.96             |
| A_68_P24119634 | chr5:136612073-136612117                          | NM_027891:-150           | Lrwd1         | DIVERGENT_PROMOTER     | 0.246                                                        | 0.500                          | 1502.65            | 751.90             | 0.123                          | 1087.69            | 133.96             |
| A_68_P31055438 | chr17:13108951-13108995                           | NM_026310:-15            | Mrpl18        | DIVERGENT_PROMOTER     | 0.246                                                        | 0.555                          | 2004.58            | 1111.78            | 0.137                          | 1378.10            | 188.36             |

| ProbeName      | Target position of probe on CpG island microarray | TargetID                | GeneSymbol    | CpG island Description | Ratio of relative methylation (TiO <sub>2</sub> -NP/Vehicle) | Sham group                     |                    |                    | TiO <sub>2</sub> -H group      |                    |                    |
|----------------|---------------------------------------------------|-------------------------|---------------|------------------------|--------------------------------------------------------------|--------------------------------|--------------------|--------------------|--------------------------------|--------------------|--------------------|
|                |                                                   |                         |               |                        |                                                              | Relative methylation (Cy5/Cy3) | Cy3 signal (Input) | Cy5 signal (MeDIP) | Relative methylation (Cy5/Cy3) | Cy3 signal (Input) | Cy5 signal (MeDIP) |
| A_68_P32471624 | chrX:72661844-72661888                            | NM_010839:16            | Mtcp1         | INSIDE                 | 0.246                                                        | 1.875                          | 2811.14            | 5270.45            | 0.461                          | 1255.02            | 578.78             |
| A_68_P31625589 | chr18:36904175-36904219                           | NM_010885:6             | Ndufa2        | INSIDE                 | 0.246                                                        | 0.535                          | 1190.46            | 637.10             | 0.132                          | 897.44             | 118.28             |
| A_68_P31499628 | chr18:12394947-12394991                           | NM_008720:-73           | Npel1         | PROMOTER               | 0.246                                                        | 0.446                          | 1984.24            | 885.73             | 0.110                          | 1492.97            | 163.80             |
| A_68_P29057274 | chr13:55929838-55929882                           | NM_011097:2926          | Pitx1         | INSIDE                 | 0.246                                                        | 0.515                          | 1751.44            | 902.75             | 0.127                          | 1017.60            | 129.18             |
| A_68_P31863202 | chr18:80453578-80453622                           | NM_001164423:556        | Pqlc1         | INSIDE                 | 0.246                                                        | 0.576                          | 1681.61            | 968.09             | 0.142                          | 1349.25            | 191.28             |
| A_68_P22031195 | chr3:30895073-30895117                            | NM_008857:402           | Prkci         | INSIDE                 | 0.246                                                        | 0.701                          | 4152.45            | 2909.57            | 0.172                          | 3217.84            | 554.14             |
| A_68_P28079293 | chr11:102255152-102255196                         | NM_016759:426           | Runde3a       | INSIDE                 | 0.246                                                        | 0.585                          | 1027.28            | 600.56             | 0.144                          | 855.32             | 123.21             |
| A_68_P30348901 | chr15:76353383-76353427                           | NM_130893:-845          | Sert1         | PROMOTER               | 0.246                                                        | 0.440                          | 1857.06            | 816.83             | 0.108                          | 1307.90            | 141.70             |
| A_68_P29982096 | chr15:5067068-5067116                             | NR_028091:-1328         | Snord72       | PROMOTER               | 0.246                                                        | 0.580                          | 980.55             | 568.62             | 0.143                          | 815.50             | 116.45             |
| A_68_P25092884 | chr7:52651057-52651101                            | NM_009224:-61           | Snmp70        | PROMOTER               | 0.246                                                        | 0.682                          | 1805.87            | 1230.80            | 0.168                          | 1483.35            | 248.75             |
| A_68_P30544452 | chr16:10784908-10784952                           | NM_009896:699           | Soes1         | INSIDE                 | 0.246                                                        | 0.522                          | 4884.69            | 2550.00            | 0.129                          | 3844.45            | 494.19             |
| A_68_P31612300 | chr18:34490731-34490775                           | NM_025527:-46           | Srp19         | PROMOTER               | 0.246                                                        | 0.570                          | 1033.65            | 589.20             | 0.140                          | 865.75             | 121.36             |
| A_68_P32196175 | chr19:55817146-55817190                           | NM_001142918:869        | Tcf7l2        | INSIDE                 | 0.246                                                        | 0.608                          | 2512.88            | 1527.96            | 0.150                          | 1820.57            | 272.60             |
| A_68_P24981572 | chr7:17038213-17038257                            | NM_026938:107           | Tmem160       | INSIDE                 | 0.246                                                        | 0.522                          | 1183.90            | 617.87             | 0.128                          | 901.40             | 115.50             |
| A_68_P24374366 | chr6:37821755-37821801                            | NM_145076:968           | Trim24        | INSIDE                 | 0.246                                                        | 0.494                          | 1248.19            | 616.73             | 0.122                          | 990.00             | 120.32             |
| A_68_P27836130 | chr11:59119814-59119858                           | NM_139298:-595          | Wnt9a         | PROMOTER               | 0.246                                                        | 0.582                          | 1039.44            | 604.57             | 0.143                          | 836.70             | 119.79             |
| A_68_P30380963 | chr15:81846798-81846842                           | NM_010247:22            | Xrcc6         | INSIDE                 | 0.246                                                        | 0.470                          | 2002.64            | 941.12             | 0.116                          | 1437.61            | 166.13             |
| A_68_P28057143 | chr11:98412469-98412513                           | NM_001166494:80         | Zpbp2         | INSIDE                 | 0.246                                                        | 0.505                          | 1163.05            | 587.02             | 0.124                          | 991.07             | 123.27             |
| A_68_P29562138 | chr14:42078358-42078402                           |                         |               | Unknown                | 0.246                                                        | 0.539                          | 1206.31            | 650.61             | 0.133                          | 922.79             | 122.37             |
| A_68_P24760446 | chr6:113554636-113554680                          | NM_133937:-107          | 6720456B07Rik | DIVERGENT_PROMOTER     | 0.245                                                        | 0.601                          | 951.85             | 572.19             | 0.147                          | 792.84             | 116.55             |
| A_68_P24067080 | chr5:125956003-125956050                          | NM_030210:-216          | Aacs          | PROMOTER               | 0.245                                                        | 0.484                          | 1225.23            | 593.39             | 0.119                          | 1006.51            | 119.61             |
| A_68_P26716246 | chr9:90058314-90058358                            | NM_001003911:521        | Adams7        | INSIDE                 | 0.245                                                        | 0.578                          | 1049.77            | 606.86             | 0.142                          | 834.05             | 118.08             |
| A_68_P31928608 | chr19:5425407-5425451                             | NM_134149:285           | Al837181      | INSIDE                 | 0.245                                                        | 0.497                          | 1252.93            | 622.27             | 0.122                          | 994.39             | 121.10             |
| A_68_P27129524 | chr10:50312341-50312389                           | NM_001146089:-110       | Asec3         | PROMOTER               | 0.245                                                        | 0.369                          | 1787.00            | 659.68             | 0.091                          | 1316.22            | 119.18             |
| A_68_P20936238 | chr1:192922619-192922663                          | NM_030060:348           | Batf3         | INSIDE                 | 0.245                                                        | 0.611                          | 1599.85            | 978.03             | 0.150                          | 1215.48            | 182.03             |
| A_68_P21067988 | chr2:24617711-24617766                            | NM_001042528:829        | Caena1b       | INSIDE                 | 0.245                                                        | 0.592                          | 1501.68            | 889.57             | 0.145                          | 1151.69            | 166.89             |
| A_68_P23321458 | chr4:133743204-133743248                          | NM_144527:-226          | Ccdc21        | PROMOTER               | 0.245                                                        | 0.628                          | 980.49             | 615.47             | 0.154                          | 795.81             | 122.63             |
| A_68_P25533790 | chr7:139508854-139508902                          | NM_029935:-40           | Chst15        | PROMOTER               | 0.245                                                        | 0.490                          | 1193.59            | 585.00             | 0.120                          | 1017.80            | 122.13             |
| A_68_P20794594 | chr1:167389733-167389777                          | NM_028759:840           | Deaf6         | INSIDE                 | 0.245                                                        | 0.493                          | 1247.80            | 615.17             | 0.121                          | 999.50             | 120.48             |
| A_68_P26426830 | chr9:36604533-36604577                            | NM_007915:99            | Ei24          | INSIDE                 | 0.245                                                        | 0.560                          | 1102.62            | 617.41             | 0.137                          | 960.57             | 131.84             |
| A_68_P22803176 | chr4:28740507-28740557                            | NM_001122889:238        | Epha7         | INSIDE                 | 0.245                                                        | 0.609                          | 1487.17            | 905.80             | 0.149                          | 1091.94            | 162.87             |
| A_68_P21339293 | chr2:74585053-74585097                            | NM_010468:35025         | Hoxd3         | INSIDE                 | 0.245                                                        | 0.569                          | 4052.26            | 2305.23            | 0.139                          | 2746.45            | 382.56             |
| A_68_P28036509 | chr11:94937682-94937726                           | NM_013565:324           | Itga3         | INSIDE                 | 0.245                                                        | 0.446                          | 1241.16            | 553.63             | 0.109                          | 1125.20            | 122.77             |
| A_68_P24112796 | chr5:135164221-135164265                          | NM_010717:218           | Limk1         | INSIDE                 | 0.245                                                        | 0.638                          | 1035.06            | 660.74             | 0.157                          | 745.45             | 116.75             |
| A_68_P30004453 | chr15:9070451-9070495                             | NM_177178:147           | Lmbrd2        | INSIDE                 | 0.245                                                        | 0.418                          | 1601.35            | 669.70             | 0.102                          | 1191.30            | 121.89             |
| A_68_P24655998 | chr6:94232997-94233041                            | NM_001029850:880        | Magi1         | INSIDE                 | 0.245                                                        | 0.606                          | 946.93             | 573.81             | 0.148                          | 867.92             | 128.81             |
| A_68_P24993423 | chr7:20043402-20043446                            | NM_172279:419           | Mark4         | INSIDE                 | 0.245                                                        | 0.476                          | 3301.16            | 1572.63            | 0.117                          | 2516.76            | 293.36             |
| A_68_P22028818 | chr3:30413802-30413849                            | NM_021442:-5416         | Mecom         | PROMOTER               | 0.245                                                        | 0.540                          | 1131.26            | 610.42             | 0.132                          | 897.32             | 118.46             |
| A_68_P28054913 | chr11:98054206-98054250                           | NM_013634:-8            | Med1          | PROMOTER               | 0.245                                                        | 0.407                          | 1488.16            | 606.27             | 0.100                          | 1159.67            | 115.57             |
| A_68_P23240178 | chr4:118082173-118082217                          | NM_020000:253           | Med8          | INSIDE                 | 0.245                                                        | 1.336                          | 7930.80            | 10595.11           | 0.327                          | 4974.24            | 1627.96            |
| A_68_P28037993 | chr11:95170830-95170877                           | NM_001195003:707        | Myst2         | INSIDE                 | 0.245                                                        | 0.679                          | 1249.80            | 848.64             | 0.166                          | 987.41             | 163.98             |
| A_68_P22081523 | chr3:40604233-40604277                            | NM_011495:382           | Plk4          | INSIDE                 | 0.245                                                        | 0.572                          | 2379.25            | 1360.46            | 0.140                          | 2032.66            | 284.53             |
| A_68_P31415145 | chr17:86568034-86568078                           | NM_011104:932           | Prkce         | INSIDE                 | 0.245                                                        | 0.519                          | 1143.65            | 593.22             | 0.127                          | 926.35             | 117.61             |
| A_68_P26983375 | chr10:19570710-19570754                           | NM_029529:533           | Slc35d3       | INSIDE                 | 0.245                                                        | 0.632                          | 2887.57            | 1824.08            | 0.155                          | 2183.68            | 338.17             |
| A_68_P26766655 | chr9:99776052-99776096                            | NM_011440:515           | Sox14         | INSIDE                 | 0.245                                                        | 0.660                          | 996.38             | 657.82             | 0.162                          | 762.66             | 123.39             |
| A_68_P27985579 | chr11:85650619-85650663                           | NM_009324:4524          | Tbx2          | INSIDE                 | 0.245                                                        | 0.454                          | 1767.83            | 802.03             | 0.111                          | 1126.42            | 125.20             |
| A_68_P31092979 | chr17:23813505-23813549                           | NM_001161746:890        | Tnfrsf12a     | INSIDE                 | 0.245                                                        | 0.733                          | 2153.76            | 1578.53            | 0.180                          | 1562.27            | 281.07             |
| A_68_P29051402 | A_68_P29051402                                    |                         |               | Unknown                | 0.245                                                        | 1.842                          | 5836.03            | 10747.53           | 0.451                          | 4088.25            | 1842.62            |
| A_68_P30555519 | A_68_P30555519                                    |                         |               | Unknown                | 0.245                                                        | 0.325                          | 1897.58            | 616.90             | 0.080                          | 1502.99            | 119.59             |
| A_68_P21571902 | chr2:119698673-119698717                          | ENSMUST00000120952:5445 |               | DOWNSTREAM             | 0.245                                                        | 0.629                          | 1584.29            | 996.08             | 0.154                          | 1155.94            | 178.25             |
| A_68_P21610826 | chr2:126758946-126758990                          | NM_023220:3             | 2010106G01Rik | INSIDE                 | 0.244                                                        | 0.617                          | 1130.54            | 697.54             | 0.151                          | 890.64             | 134.16             |

| ProbeName      | Target position of probe on CpG island microarray | TargetID           | GeneSymbol | CpG island Description | Ratio of relative methylation (TiO <sub>2</sub> -NP/Vehicle) | Sham group                     |                    |                    | TiO <sub>2</sub> -H group      |                    |                    |
|----------------|---------------------------------------------------|--------------------|------------|------------------------|--------------------------------------------------------------|--------------------------------|--------------------|--------------------|--------------------------------|--------------------|--------------------|
|                |                                                   |                    |            |                        |                                                              | Relative methylation (Cy5/Cy3) | Cy3 signal (Input) | Cy5 signal (MeDIP) | Relative methylation (Cy5/Cy3) | Cy3 signal (Input) | Cy5 signal (MeDIP) |
| A_68_P24114260 | chr5:135484941-135484991                          | NM_001190437:-55   | Abhd11     | DIVERGENT_PROMOTER     | 0.244                                                        | 0.474                          | 1464.32            | 694.49             | 0.116                          | 1000.99            | 115.94             |
| A_68_P28314431 | chr12:29360343-29360387                           | NM_134052:293      | Adi1       | INSIDE                 | 0.244                                                        | 0.469                          | 1350.01            | 633.68             | 0.115                          | 1064.12            | 121.95             |
| A_68_P27565299 | chr11:5761759-5761803                             | NM_009636:-88      | Aebp1      | PROMOTER               | 0.244                                                        | 0.742                          | 2809.22            | 2083.64            | 0.181                          | 1898.17            | 343.24             |
| A_68_P26229676 | chr8:124431860-124431904                          | NM_001033485:150   | BC048644   | INSIDE                 | 0.244                                                        | 0.520                          | 1210.66            | 628.95             | 0.127                          | 932.86             | 118.29             |
| A_68_P27540747 | chr10:127759432-127759482                         | NM_019953:-58      | Cnpy2      | PROMOTER               | 0.244                                                        | 0.628                          | 955.92             | 600.68             | 0.153                          | 772.39             | 118.43             |
| A_68_P25667343 | chr8:13288388-13288432                            | NM_001024504:-284  | Deun1d2    | PROMOTER               | 0.244                                                        | 0.326                          | 1894.86            | 616.97             | 0.079                          | 1556.70            | 123.69             |
| A_68_P27903933 | chr11:70832700-70832744                           | NM_033562:43       | Der12      | INSIDE                 | 0.244                                                        | 0.381                          | 1754.26            | 668.50             | 0.093                          | 1381.42            | 128.49             |
| A_68_P27677368 | chr11:29925763-29925807                           | NM_146016:249      | Eml6       | INSIDE                 | 0.244                                                        | 0.608                          | 987.77             | 600.81             | 0.148                          | 830.95             | 123.13             |
| A_68_P23392754 | chr4:147534489-147534533                          | NM_176848:-266     | Fbxo2      | DIVERGENT_PROMOTER     | 0.244                                                        | 0.459                          | 1456.48            | 667.93             | 0.112                          | 1069.47            | 119.76             |
| A_68_P24533909 | chr6:70906592-70906636                            | NM_001101464:15    | Foxi3      | INSIDE                 | 0.244                                                        | 0.417                          | 1622.51            | 676.55             | 0.102                          | 1155.70            | 117.56             |
| A_68_P27286406 | chr10:80392969-80393019                           | NM_008655:159      | Gadd45b    | INSIDE                 | 0.244                                                        | 0.460                          | 1472.03            | 677.22             | 0.112                          | 1063.21            | 119.17             |
| A_68_P26244130 | chr8:126756129-126756173                          | NM_139272:857      | Galnt2     | INSIDE                 | 0.244                                                        | 0.534                          | 1334.06            | 711.97             | 0.130                          | 917.18             | 119.50             |
| A_68_P23404232 | chr4:149461503-149461547                          | NM_177366:-87      | Gpr157     | PROMOTER               | 0.244                                                        | 1.620                          | 10929.57           | 17710.04           | 0.396                          | 7593.87            | 3007.82            |
| A_68_P21576348 | chr2:120454904-120454948                          | NM_025475:19755    | Haus2      | DOWNSTREAM             | 0.244                                                        | 0.697                          | 3304.90            | 2303.35            | 0.170                          | 2438.74            | 414.22             |
| A_68_P26546344 | chr9:58047294-58047338                            | NM_001161535:2206  | Islr2      | INSIDE                 | 0.244                                                        | 0.661                          | 1999.15            | 1322.25            | 0.162                          | 1417.19            | 228.96             |
| A_68_P24828016 | chr6:126594679-126594723                          | NM_010595:1119     | Kena1      | INSIDE                 | 0.244                                                        | 0.503                          | 1603.48            | 807.19             | 0.123                          | 1380.67            | 169.72             |
| A_68_P31343005 | chr17:73267359-73267403                           | NM_029999:-264     | Lbh        | PROMOTER               | 0.244                                                        | 0.389                          | 1741.25            | 676.88             | 0.095                          | 1292.48            | 122.46             |
| A_68_P26884588 | chr9:121551071-121551115                          | NM_026915:-408     | Lyz4       | DIVERGENT_PROMOTER     | 0.244                                                        | 0.645                          | 1522.36            | 981.64             | 0.158                          | 1127.33            | 177.62             |
| A_68_P27533650 | chr10:126479347-126479401                         | NM_010792:387      | Mettl1     | INSIDE                 | 0.244                                                        | 0.591                          | 1156.34            | 683.10             | 0.144                          | 809.82             | 116.79             |
| A_68_P26345185 | chr9:20841278-20841322                            | NR_035438:-4528    | Mir1900    | PROMOTER               | 0.244                                                        | 0.466                          | 1128.85            | 526.57             | 0.114                          | 1021.55            | 116.11             |
| A_68_P27285700 | chr10:80289932-80289982                           | NR_035503:-1585    | Mir1982    | PROMOTER               | 0.244                                                        | 0.549                          | 1267.57            | 695.71             | 0.134                          | 870.10             | 116.62             |
| A_68_P20454938 | chr1:95239228-95239272                            | NM_008050:115      | Pask       | INSIDE                 | 0.244                                                        | 0.722                          | 3157.92            | 2279.07            | 0.176                          | 2475.54            | 436.55             |
| A_68_P31937064 | chr19:7050018-7050063                             | NM_008889:503      | Ppp1r14b   | INSIDE                 | 0.244                                                        | 0.593                          | 1205.82            | 714.66             | 0.144                          | 853.58             | 123.19             |
| A_68_P31084397 | chr17:21082131-21082175                           | NM_016891:-265     | Ppp2r1a    | PROMOTER               | 0.244                                                        | 0.565                          | 1103.92            | 623.25             | 0.138                          | 871.77             | 120.28             |
| A_68_P22182580 | chr3:61168280-61168324                            | NM_028712:-126     | Rap2b      | PROMOTER               | 0.244                                                        | 0.606                          | 1397.27            | 846.36             | 0.148                          | 1139.91            | 168.73             |
| A_68_P32044142 | chr19:28086118-28086162                           | NM_011265:-484     | Rfx3       | PROMOTER               | 0.244                                                        | 0.695                          | 3564.25            | 2477.90            | 0.170                          | 2644.48            | 449.18             |
| A_68_P30224201 | chr15:53733924-53733974                           | NM_177225:43       | Samd12     | INSIDE                 | 0.244                                                        | 0.505                          | 2498.86            | 1262.95            | 0.123                          | 1701.81            | 209.48             |
| A_68_P29116723 | chr13:69750440-69750484                           | NM_175283:-121     | Srd5a1     | DIVERGENT_PROMOTER     | 0.244                                                        | 0.533                          | 2400.14            | 1279.76            | 0.130                          | 1674.04            | 218.05             |
| A_68_P26431943 | chr9:37464781-37464825                            | NM_025289:95       | Tbpg1      | INSIDE                 | 0.244                                                        | 0.463                          | 1252.33            | 580.45             | 0.113                          | 1042.16            | 117.71             |
| A_68_P30510784 | chr16:4558577-4558621                             | NM_031182:1122     | Tefap4     | INSIDE                 | 0.244                                                        | 0.518                          | 1220.51            | 631.83             | 0.126                          | 1044.20            | 131.77             |
| A_68_P31936613 | chr19:6984303-6984347                             | NM_001166370:137   | Trmt112    | INSIDE                 | 0.244                                                        | 0.473                          | 2017.31            | 954.86             | 0.116                          | 1482.48            | 171.54             |
| A_68_P30476480 | chr15:98622772-98622816                           | NM_021279:2507     | Wnt1       | INSIDE                 | 0.244                                                        | 2.247                          | 1342.39            | 3015.79            | 0.547                          | 940.63             | 514.86             |
| A_68_P31840894 | chr18:76219449-76219494                           | NM_145356:239640   | Zbtb7c     | INSIDE                 | 0.244                                                        | 0.543                          | 1301.60            | 707.11             | 0.133                          | 914.90             | 121.46             |
| A_68_P31086419 | chr17:21669765-21669813                           | NM_144515:-2714    | Zfp52      | PROMOTER               | 0.244                                                        | 0.595                          | 1120.49            | 666.87             | 0.145                          | 853.51             | 124.17             |
| A_68_P27809324 | chr11:54117377-54117421                           | NM_001033597:-307  | Acsf6      | PROMOTER               | 0.243                                                        | 0.597                          | 2608.15            | 1556.32            | 0.145                          | 1796.55            | 260.30             |
| A_68_P31939553 | chr19:7456891-7456935                             | NM_001033139:604   | AI846148   | INSIDE                 | 0.243                                                        | 0.574                          | 1135.49            | 651.36             | 0.139                          | 925.61             | 129.10             |
| A_68_P25090207 | chr7:52184463-52184510                            | NM_001077264:374   | Ap2a1      | INSIDE                 | 0.243                                                        | 0.639                          | 1123.22            | 717.46             | 0.155                          | 829.36             | 128.78             |
| A_68_P26595210 | chr9:66643453-66643497                            | NM_177583:-244     | Aph1b      | PROMOTER               | 0.243                                                        | 0.391                          | 1839.09            | 719.38             | 0.095                          | 1408.54            | 133.93             |
| A_68_P28836397 | chr13:14046979-14047023                           | NM_178640:60       | B3galnt2   | INSIDE                 | 0.243                                                        | 0.301                          | 2015.66            | 606.76             | 0.073                          | 1578.47            | 115.55             |
| A_68_P30369305 | chr15:79764056-79764100                           | NM_144811:-1002    | Cbx7       | PROMOTER               | 0.243                                                        | 0.517                          | 1337.74            | 692.07             | 0.126                          | 1058.17            | 133.11             |
| A_68_P26822740 | chr9:110148381-110148425                          | NM_001166273:2116  | Cspg5      | INSIDE                 | 0.243                                                        | 0.733                          | 5820.68            | 4268.36            | 0.178                          | 4139.87            | 736.45             |
| A_68_P21629321 | chr2:130188203-130188247                          | NM_001110513:66550 | Ebf4       | INSIDE                 | 0.243                                                        | 1.346                          | 2219.49            | 2987.63            | 0.327                          | 1802.35            | 589.92             |
| A_68_P27034329 | chr10:29033110-29033154                           | NM_025855:-173     | Echdc1     | PROMOTER               | 0.243                                                        | 0.529                          | 4172.73            | 2208.30            | 0.128                          | 3208.55            | 412.26             |
| A_68_P30221114 | chr15:53176756-53176800                           | NM_010162:960      | Ext1       | INSIDE                 | 0.243                                                        | 0.723                          | 3801.24            | 2749.66            | 0.176                          | 2835.52            | 499.15             |
| A_68_P20432979 | chr1:91825300-91825344                            | NM_010262:2429     | Gbx2       | INSIDE                 | 0.243                                                        | 0.575                          | 1071.25            | 616.12             | 0.140                          | 893.18             | 124.67             |
| A_68_P31205408 | chr17:46297849-46297904                           | NM_001145979:-104  | Gtppb2     | DIVERGENT_PROMOTER     | 0.243                                                        | 0.545                          | 1351.33            | 735.85             | 0.132                          | 916.38             | 121.11             |
| A_68_P24783942 | chr6:117857933-117857977                          | NM_001166427:-9357 | Hnrnpf     | PROMOTER               | 0.243                                                        | 0.508                          | 1155.66            | 587.04             | 0.124                          | 943.02             | 116.55             |
| A_68_P24537471 | chr6:71583335-71583379                            | NM_001038695:-457  | Kdm3a      | PROMOTER               | 0.243                                                        | 0.635                          | 2180.31            | 1384.48            | 0.154                          | 1665.30            | 257.21             |
| A_68_P24137290 | chr5:140212320-140212364                          | NM_174850:-55      | Mical2     | PROMOTER               | 0.243                                                        | 0.659                          | 4096.08            | 2697.83            | 0.160                          | 3099.99            | 496.06             |
| A_68_P28833747 | chr13:13530554-13530598                           | NM_010917:708      | Nid1       | INSIDE                 | 0.243                                                        | 0.598                          | 969.85             | 579.59             | 0.145                          | 838.52             | 121.56             |
| A_68_P24754179 | chr6:112439818-112439862                          | NM_001081147:-38   | Oxtr       | PROMOTER               | 0.243                                                        | 0.504                          | 1737.96            | 875.89             | 0.122                          | 1551.07            | 189.66             |



| ProbeName      | Target position of probe on CpG island microarray | TargetID               | GeneSymbol    | CpG island Description | Ratio of relative methylation (TiO <sub>2</sub> -NP/Vehicle) | Sham group                     |                    |                    | TiO <sub>2</sub> -H group      |                    |                    |
|----------------|---------------------------------------------------|------------------------|---------------|------------------------|--------------------------------------------------------------|--------------------------------|--------------------|--------------------|--------------------------------|--------------------|--------------------|
|                |                                                   |                        |               |                        |                                                              | Relative methylation (Cy5/Cy3) | Cy3 signal (Input) | Cy5 signal (MeDIP) | Relative methylation (Cy5/Cy3) | Cy3 signal (Input) | Cy5 signal (MeDIP) |
| A_68_P22342239 | chr3:94910572-94910617                            | NM_008847:186          | Pip5k1a       | INSIDE                 | 0.243                                                        | 0.663                          | 904.30             | 599.63             | 0.161                          | 732.92             | 118.25             |
| A_68_P23820897 | chr5:77739417-77739462                            | NM_153798:-69          | Polr2b        | DIVERGENT_PROMOTER     | 0.243                                                        | 0.520                          | 1813.02            | 943.61             | 0.127                          | 1398.18            | 177.01             |
| A_68_P26229672 | chr8:124431324-124431368                          | NM_011404:240          | Slc7a5        | INSIDE                 | 0.243                                                        | 0.312                          | 2401.66            | 749.30             | 0.076                          | 1603.84            | 121.68             |
| A_68_P25235396 | chr7:81699348-81699401                            | NM_001038643:292       | Slco3a1       | INSIDE                 | 0.243                                                        | 0.664                          | 1024.28            | 679.64             | 0.161                          | 769.19             | 124.14             |
| A_68_P27844727 | chr11:60591282-60591326                           | NM_175491:278          | Smer8         | INSIDE                 | 0.243                                                        | 0.570                          | 1093.53            | 623.35             | 0.138                          | 862.45             | 119.33             |
| A_68_P24016052 | chr5:117041312-117041356                          | NM_026886:492          | Srrm4         | INSIDE                 | 0.243                                                        | 0.597                          | 1087.61            | 649.40             | 0.145                          | 809.76             | 117.66             |
| A_68_P25571660 | chr7:145588945-145588989                          | NM_183289:447          | Tcerg11       | INSIDE                 | 0.243                                                        | 0.622                          | 2394.00            | 1488.74            | 0.151                          | 2010.74            | 303.62             |
| A_68_P21864922 | chr2:172376858-172376902                          | NM_001159696:390       | Tefap2c       | INSIDE                 | 0.243                                                        | 0.596                          | 1295.26            | 771.39             | 0.145                          | 996.76             | 144.38             |
| A_68_P20596473 | chr1:129574700-129574744                          | NM_028135:-124         | Tmem163       | PROMOTER               | 0.243                                                        | 0.480                          | 1539.93            | 739.68             | 0.117                          | 1033.16            | 120.45             |
| A_68_P28157536 | chr11:115992427-115992471                         | NM_178802:-6           | Trim65        | PROMOTER               | 0.243                                                        | 0.472                          | 1327.99            | 626.75             | 0.115                          | 1088.63            | 124.89             |
| A_68_P28712202 | chr12:107201120-107201164                         | BC156654:163282        |               | INSIDE                 | 0.243                                                        | 0.617                          | 994.33             | 613.85             | 0.150                          | 810.65             | 121.63             |
| A_68_P28450735 | chr12:56225735-56225781                           | NM_001100116:244       | 170004717Rik2 | INSIDE                 | 0.242                                                        | 0.608                          | 994.36             | 604.88             | 0.147                          | 796.08             | 117.20             |
| A_68_P25933302 | chr8:69010455-69010506                            | NM_025465:-74          | 1810029B16Rik | PROMOTER               | 0.242                                                        | 0.675                          | 1746.74            | 1178.53            | 0.164                          | 1330.58            | 217.58             |
| A_68_P27899564 | chr11:70040111-70040155                           | NM_007528:3168         | Bcl6b         | INSIDE                 | 0.242                                                        | 0.548                          | 1105.14            | 605.71             | 0.133                          | 906.96             | 120.48             |
| A_68_P31351852 | chr17:74927433-74927479                           | NM_007566:-178         | Birc6         | PROMOTER               | 0.242                                                        | 0.596                          | 962.59             | 573.43             | 0.144                          | 805.36             | 116.00             |
| A_68_P31152219 | chr17:34257154-34257198                           | NR_037970:-331         | Brd2          | PROMOTER               | 0.242                                                        | 0.558                          | 2029.96            | 1132.29            | 0.135                          | 1410.13            | 190.53             |
| A_68_P24011279 | chr5:116181126-116181170                          | NM_001080808:420       | Ccdc64        | INSIDE                 | 0.242                                                        | 0.452                          | 2184.71            | 988.45             | 0.109                          | 1684.64            | 184.15             |
| A_68_P30362683 | chr15:78673475-78673519                           | NM_027219:420          | Cdc42ep1      | INSIDE                 | 0.242                                                        | 0.635                          | 881.58             | 559.83             | 0.154                          | 802.19             | 123.46             |
| A_68_P23807021 | chr5:75440173-75440217                            | NM_028850:457          | Chic2         | INSIDE                 | 0.242                                                        | 0.641                          | 857.81             | 549.48             | 0.155                          | 792.60             | 122.78             |
| A_68_P28754915 | chr12:114378792-114378837                         | NM_024223:368          | Crip2         | INSIDE                 | 0.242                                                        | 0.632                          | 945.68             | 598.03             | 0.153                          | 758.98             | 116.00             |
| A_68_P24058178 | chr5:124356959-124357007                          | NM_026603:-301         | Denr          | PROMOTER               | 0.242                                                        | 0.604                          | 1267.63            | 766.02             | 0.146                          | 1001.66            | 146.57             |
| A_68_P20875116 | chr1:182262065-182262109                          | NR_003623:-1406        | Gm5069        | PROMOTER               | 0.242                                                        | 0.613                          | 1056.39            | 648.05             | 0.149                          | 815.81             | 121.22             |
| A_68_P26807872 | chr9:107240552-107240596                          | NM_133984:107          | Hemk1         | INSIDE                 | 0.242                                                        | 0.372                          | 1849.45            | 687.29             | 0.090                          | 1339.56            | 120.37             |
| A_68_P21338756 | chr2:74520344-74520390                            | NM_008273:-83          | Hoxd11        | PROMOTER               | 0.242                                                        | 0.554                          | 1053.33            | 583.16             | 0.134                          | 864.65             | 115.70             |
| A_68_P23231145 | chr4:116497325-116497369                          | NM_146256:-3233        | Hpd1          | PROMOTER               | 0.242                                                        | 0.438                          | 1410.27            | 617.73             | 0.106                          | 1110.21            | 117.57             |
| A_68_P27765088 | chr11:45757957-45758001                           | NM_028185:459          | Lsm11         | INSIDE                 | 0.242                                                        | 0.377                          | 1609.20            | 606.79             | 0.091                          | 1316.93            | 120.41             |
| A_68_P30345342 | chr15:75824398-75824446                           | NM_177922:224          | Mapk15        | INSIDE                 | 0.242                                                        | 0.550                          | 1780.30            | 979.20             | 0.133                          | 1385.91            | 184.43             |
| A_68_P24191781 | chr5:151396250-151396294                          | NM_133898:828          | N4bp2l1       | INSIDE                 | 0.242                                                        | 0.498                          | 1290.90            | 642.22             | 0.120                          | 982.44             | 118.33             |
| A_68_P29620047 | chr14:56442581-56442635                           | NM_001168346:-1023     | Nfate4        | PROMOTER               | 0.242                                                        | 0.553                          | 1077.63            | 595.69             | 0.134                          | 908.41             | 121.71             |
| A_68_P25093530 | chr7:52765419-52765466                            | NM_001163662:336       | Nucb1         | INSIDE                 | 0.242                                                        | 0.652                          | 1067.29            | 695.72             | 0.158                          | 768.33             | 121.05             |
| A_68_P29962218 | chr14:122933824-122933868                         | NM_144844:297          | Pcca          | INSIDE                 | 0.242                                                        | 0.347                          | 1782.42            | 618.16             | 0.084                          | 1398.41            | 117.43             |
| A_68_P26700012 | chr9:86465331-86465375                            | NM_001163746:94        | Pgm3          | INSIDE                 | 0.242                                                        | 0.436                          | 1471.64            | 641.64             | 0.105                          | 1155.40            | 121.71             |
| A_68_P24048830 | chr5:122607910-122607954                          | NM_013636:-355         | Ppp1cc        | PROMOTER               | 0.242                                                        | 0.542                          | 2194.06            | 1189.79            | 0.131                          | 1630.19            | 214.19             |
| A_68_P26463574 | chr9:43553274-43553318                            | NM_021424:638          | Pvr1l         | INSIDE                 | 0.242                                                        | 0.476                          | 1881.60            | 894.91             | 0.115                          | 1558.53            | 179.03             |
| A_68_P24604717 | chr6:85324325-85324369                            | NM_001003955:282       | Rab11fip5     | INSIDE                 | 0.242                                                        | 0.368                          | 1593.78            | 585.86             | 0.089                          | 1316.00            | 117.27             |
| A_68_P22906128 | chr4:49645277-49645321                            | NM_001163263:367       | Rnf20         | INSIDE                 | 0.242                                                        | 0.440                          | 1702.79            | 748.41             | 0.107                          | 1139.29            | 121.41             |
| A_68_P32464060 | chrX:70918500-70918544                            | NM_001142809:51        | Slc6a8        | INSIDE                 | 0.242                                                        | 1.628                          | 1115.81            | 1816.54            | 0.394                          | 465.66             | 183.51             |
| A_68_P29892688 | chr14:109310708-109310754                         | NM_199065:2726         | Slitrk1       | INSIDE                 | 0.242                                                        | 0.479                          | 1492.99            | 715.24             | 0.116                          | 1061.43            | 122.83             |
| A_68_P21628394 | chr2:130004810-130004854                          | NM_009225:268          | Snrpb         | INSIDE                 | 0.242                                                        | 0.439                          | 1231.64            | 540.40             | 0.106                          | 1112.82            | 118.16             |
| A_68_P26766651 | chr9:99775638-99775682                            | NM_011440:929          | Sox14         | INSIDE                 | 0.242                                                        | 0.592                          | 1159.00            | 686.08             | 0.143                          | 996.97             | 142.58             |
| A_68_P20962665 | chr2:3391654-3391704                              | NM_022724:580          | Suv39h2       | INSIDE                 | 0.242                                                        | 0.594                          | 1232.45            | 732.22             | 0.144                          | 848.70             | 122.23             |
| A_68_P22538545 | chr3:132347325-132347369                          | NM_173032:239          | Tbck          | INSIDE                 | 0.242                                                        | 0.564                          | 1141.22            | 644.05             | 0.137                          | 872.71             | 119.33             |
| A_68_P25589127 | chr7:148667760-148667804                          | NM_053082:6644         | Tspan4        | INSIDE                 | 0.242                                                        | 1.392                          | 4036.73            | 5617.31            | 0.337                          | 2621.74            | 883.40             |
| A_68_P22372359 | chr3:100773528-100773572                          | NM_001013026:36        | Tt2           | INSIDE                 | 0.242                                                        | 0.379                          | 1562.60            | 591.71             | 0.092                          | 1281.75            | 117.52             |
| A_68_P24955196 | chr7:6335606-6335650                              | NM_175247:-399         | Zfp28         | PROMOTER               | 0.242                                                        | 0.734                          | 4728.37            | 3468.38            | 0.177                          | 3321.74            | 588.85             |
| A_68_P20807989 | chr1:169859876-169859920                          |                        | Unknown       |                        | 0.242                                                        | 0.416                          | 1495.89            | 622.72             | 0.101                          | 1161.33            | 116.93             |
| A_68_P25600978 | chr7:150631111-150631170                          |                        | Unknown       |                        | 0.242                                                        | 0.591                          | 972.71             | 575.19             | 0.143                          | 835.65             | 119.75             |
| A_68_P25447473 | chr7:123450914-123450958                          | ENSMUST00000106605:954 |               | INSIDE                 | 0.242                                                        | 0.455                          | 1224.62            | 556.85             | 0.110                          | 1119.93            | 123.37             |
| A_68_P21108247 | chr2:31170255-31170299                            | ENSMUST00000113532:342 |               | INSIDE                 | 0.242                                                        | 0.633                          | 1447.25            | 916.49             | 0.153                          | 1104.90            | 169.09             |
| A_68_P31129446 | chr17:29853826-29853870                           | NM_001163741:114       | 1110021J02Rik | INSIDE                 | 0.241                                                        | 1.895                          | 2742.01            | 5195.22            | 0.457                          | 1743.70            | 797.18             |
| A_68_P29509884 | chr14:31943948-31943992                           | NR_024069:-1854        | 2010107H07Rik | DIVERGENT_PROMOTER     | 0.241                                                        | 0.517                          | 1129.05            | 583.15             | 0.124                          | 982.77             | 122.29             |

| ProbeName      | Target position of probe on CpG island microarray | TargetID            | GeneSymbol    | CpG island Description | Ratio of relative methylation (TiO <sub>2</sub> -NP/Vehicle) | Sham group                     |                    |                    | TiO <sub>2</sub> -H group      |                    |                    |
|----------------|---------------------------------------------------|---------------------|---------------|------------------------|--------------------------------------------------------------|--------------------------------|--------------------|--------------------|--------------------------------|--------------------|--------------------|
|                |                                                   |                     |               |                        |                                                              | Relative methylation (Cy5/Cy3) | Cy3 signal (Input) | Cy5 signal (MeDIP) | Relative methylation (Cy5/Cy3) | Cy3 signal (Input) | Cy5 signal (MeDIP) |
| A_68_P25010196 | chr7:26180415-26180459                            | NR_015569:4         | 4732471J01Rik | INSIDE                 | 0.241                                                        | 0.567                          | 1132.31            | 641.65             | 0.136                          | 846.53             | 115.51             |
| A_68_P31833164 | chr18:74938725-74938769                           | NM_177470:-119      | Acaa2         | DIVERGENT_PROMOTER     | 0.241                                                        | 0.502                          | 2606.13            | 1308.81            | 0.121                          | 1781.96            | 215.91             |
| A_68_P22682773 | chr3:157611083-157611131                          | NM_001013806:677    | Ankrd13c      | INSIDE                 | 0.241                                                        | 0.612                          | 1000.60            | 612.51             | 0.148                          | 782.41             | 115.64             |
| A_68_P28725222 | chr12:109242213-109242257                         | NM_001079883:-610   | Bcl11b        | PROMOTER               | 0.241                                                        | 0.588                          | 1544.12            | 908.21             | 0.142                          | 1218.37            | 172.55             |
| A_68_P33005171 | chr7:3366221-3366265                              | NM_133189:29558     | Caeng7        | INSIDE                 | 0.241                                                        | 0.708                          | 1610.43            | 1139.90            | 0.170                          | 1209.08            | 205.95             |
| A_68_P22889569 | chr4:46614182-46614226                            | NM_001164804:597    | Coro2a        | INSIDE                 | 0.241                                                        | 0.676                          | 1630.99            | 1103.03            | 0.163                          | 1072.11            | 174.96             |
| A_68_P21103093 | chr2:30270839-30270883                            | NM_007760:408       | Crat          | INSIDE                 | 0.241                                                        | 0.471                          | 1612.70            | 759.28             | 0.114                          | 1062.47            | 120.66             |
| A_68_P21778674 | chr2:157563392-157563436                          | NM_025680:278       | Cttnb1        | INSIDE                 | 0.241                                                        | 0.409                          | 1607.35            | 657.19             | 0.098                          | 1161.13            | 114.34             |
| A_68_P25009061 | chr7:26004576-26004627                            | NM_207677:277       | Dedd2         | INSIDE                 | 0.241                                                        | 0.694                          | 1176.13            | 816.64             | 0.167                          | 846.85             | 141.51             |
| A_68_P27278867 | chr10:79240093-79240137                           | NM_031380:96        | Fstl3         | INSIDE                 | 0.241                                                        | 1.481                          | 8370.81            | 12393.22           | 0.357                          | 5246.39            | 1873.49            |
| A_68_P21609430 | chr2:126501185-126501229                          | NM_010249:16        | Gabpb1        | INSIDE                 | 0.241                                                        | 0.665                          | 1458.02            | 969.02             | 0.160                          | 1358.39            | 217.26             |
| A_68_P25274807 | chr7:89078453-89078497                            | NM_013886:871       | Hdgfrp3       | INSIDE                 | 0.241                                                        | 0.657                          | 1393.32            | 915.63             | 0.159                          | 1078.97            | 171.14             |
| A_68_P28918889 | chr13:30842632-30842676                           | NM_013674:1528      | Irf4          | INSIDE                 | 0.241                                                        | 0.560                          | 2493.13            | 1395.72            | 0.135                          | 1806.47            | 243.41             |
| A_68_P31296465 | chr17:64951073-64951117                           | NM_008549:106       | Man2a1        | INSIDE                 | 0.241                                                        | 0.465                          | 1684.05            | 783.28             | 0.112                          | 1390.37            | 155.69             |
| A_68_P22289192 | chr3:83959834-83959879                            | NM_029797:-148      | Mnd1          | PROMOTER               | 0.241                                                        | 0.577                          | 1528.94            | 881.90             | 0.139                          | 1204.95            | 167.29             |
| A_68_P29368030 | chr13:119176079-119176123                         | NM_021556:-41       | Mrps30        | PROMOTER               | 0.241                                                        | 0.488                          | 1388.29            | 677.38             | 0.118                          | 1022.53            | 120.20             |
| A_68_P27283558 | chr10:79957724-79957768                           | NM_139226:96        | Onecut3       | INSIDE                 | 0.241                                                        | 0.669                          | 1296.30            | 867.20             | 0.161                          | 1054.45            | 169.95             |
| A_68_P22484165 | chr3:122432345-122432393                          | NM_153422:293       | Pde5a         | INSIDE                 | 0.241                                                        | 0.718                          | 1869.49            | 1342.96            | 0.173                          | 1351.58            | 233.54             |
| A_68_P25375613 | chr7:108970639-108970683                          | NM_008887:3834      | Phox2a        | INSIDE                 | 0.241                                                        | 0.595                          | 947.93             | 564.05             | 0.143                          | 821.31             | 117.77             |
| A_68_P22342241 | chr3:94910847-94910891                            | NM_008847:-88       | Pip5k1a       | DIVERGENT_PROMOTER     | 0.241                                                        | 0.617                          | 967.92             | 596.73             | 0.148                          | 820.56             | 121.76             |
| A_68_P32142306 | chr19:46221925-46221969                           | NM_008852:869       | Pitx3         | INSIDE                 | 0.241                                                        | 0.402                          | 4293.47            | 1727.85            | 0.097                          | 3312.00            | 320.83             |
| A_68_P27630333 | chr11:20101414-20101458                           | NM_008996:-168      | Rab1          | PROMOTER               | 0.241                                                        | 0.648                          | 1231.38            | 797.88             | 0.156                          | 941.83             | 146.80             |
| A_68_P28038461 | chr11:95245810-95245864                           | NM_016752:-399      | Slc35b1       | PROMOTER               | 0.241                                                        | 0.677                          | 948.26             | 642.06             | 0.163                          | 735.47             | 120.24             |
| A_68_P20596467 | chr1:129573905-129573949                          | NM_028135:672       | Tmem163       | INSIDE                 | 0.241                                                        | 0.393                          | 1527.15            | 600.07             | 0.095                          | 1231.66            | 116.79             |
| A_68_P28520554 | chr12:71554239-71554283                           | NM_028339:120       | Tmx1          | INSIDE                 | 0.241                                                        | 0.426                          | 1369.19            | 583.75             | 0.103                          | 1131.56            | 116.17             |
| A_68_P21099685 | chr2:29682982-29683026                            | NM_026615:96        | Urm1          | INSIDE                 | 0.241                                                        | 0.515                          | 1175.62            | 605.07             | 0.124                          | 967.59             | 119.94             |
| A_68_P30719353 | chr16:44063345-44063389                           | AK153403:75766      |               | INSIDE                 | 0.241                                                        | 0.589                          | 1310.44            | 772.03             | 0.142                          | 1124.33            | 159.32             |
| A_68_P29964259 | chr14:123312516-123312560                         | NM_145466:-151      | A2ld1         | PROMOTER               | 0.240                                                        | 0.412                          | 3027.30            | 1246.68            | 0.099                          | 2385.40            | 236.01             |
| A_68_P29342440 | chr13:114584633-114584677                         | NM_172595:-61       | Arl15         | PROMOTER               | 0.240                                                        | 0.709                          | 2740.09            | 1942.55            | 0.170                          | 1994.72            | 339.44             |
| A_68_P22941606 | chr4:56815104-56815148                            | NM_001081420:-74    | BC026590      | PROMOTER               | 0.240                                                        | 0.624                          | 2061.16            | 1286.76            | 0.150                          | 1541.91            | 230.83             |
| A_68_P23410166 | chr4:150482290-150482334                          | NM_001081557:753565 | Camta1        | INSIDE                 | 0.240                                                        | 0.480                          | 6637.68            | 3189.30            | 0.115                          | 4849.80            | 559.19             |
| A_68_P25782095 | chr8:36889705-36889749                            | NM_027998:-113      | Cldn23        | PROMOTER               | 0.240                                                        | 0.662                          | 5066.24            | 3353.75            | 0.159                          | 3789.35            | 601.43             |
| A_68_P20412923 | chr1:88483836-88483880                            | NM_172974:184       | Cops7b        | INSIDE                 | 0.240                                                        | 0.534                          | 3097.12            | 1654.84            | 0.128                          | 2250.29            | 288.46             |
| A_68_P27284382 | chr10:80085896-80085940                           | NM_001159591:-6482  | Cank1g2       | PROMOTER               | 0.240                                                        | 0.400                          | 2767.12            | 1106.66            | 0.096                          | 1963.51            | 188.81             |
| A_68_P24600309 | chr6:84539419-84539463                            | NM_175475:4364      | Cyp26b1       | INSIDE                 | 0.240                                                        | 0.514                          | 1259.93            | 647.70             | 0.124                          | 976.92             | 120.77             |
| A_68_P21102297 | chr2:30141550-30141594                            | NM_177648:302       | Dolk          | INSIDE                 | 0.240                                                        | 0.584                          | 1091.43            | 637.59             | 0.140                          | 871.46             | 122.24             |
| A_68_P28038138 | chr11:95198892-95198936                           | NM_172543:583       | Fam117a       | INSIDE                 | 0.240                                                        | 1.589                          | 7638.24            | 12136.56           | 0.381                          | 4870.98            | 1855.31            |
| A_68_P26529950 | chr9:55057294-55057339                            | NM_028049:575       | Fbxo22        | INSIDE                 | 0.240                                                        | 0.582                          | 1123.23            | 654.00             | 0.140                          | 848.96             | 118.67             |
| A_68_P21107214 | chr2:30996795-30996839                            | NM_001038700:712    | Fnbp1         | INSIDE                 | 0.240                                                        | 0.658                          | 2276.84            | 1498.09            | 0.158                          | 1765.69            | 278.45             |
| A_68_P31484558 | chr18:9214394-9214440                             | NM_008058:1563      | Fzd8          | INSIDE                 | 0.240                                                        | 0.683                          | 1065.65            | 728.21             | 0.164                          | 751.82             | 123.30             |
| A_68_P28221292 | chr12:8305005-8305049                             | NM_013527:3734      | Gdf7          | INSIDE                 | 0.240                                                        | 0.471                          | 3100.53            | 1461.60            | 0.113                          | 2033.55            | 230.54             |
| A_68_P28059766 | chr11:98844320-98844364                           | NM_178596:-12       | Gjd3          | PROMOTER               | 0.240                                                        | 0.634                          | 2659.07            | 1686.37            | 0.152                          | 1969.80            | 299.66             |
| A_68_P28153961 | chr11:115375325-115375369                         | NM_008258:338       | Hn1           | INSIDE                 | 0.240                                                        | 0.667                          | 868.25             | 579.30             | 0.160                          | 744.49             | 119.08             |
| A_68_P24632567 | chr6:90413191-90413235                            | NM_023184:593       | Klf15         | INSIDE                 | 0.240                                                        | 0.525                          | 2516.21            | 1320.70            | 0.126                          | 1879.15            | 237.05             |
| A_68_P28068271 | chr11:100333552-100333596                         | NM_172565:522       | Klh11         | INSIDE                 | 0.240                                                        | 0.560                          | 1198.84            | 671.53             | 0.134                          | 917.33             | 123.31             |
| A_68_P24142214 | chr5:141082926-141082970                          | NM_008494:-346      | Lfng          | PROMOTER               | 0.240                                                        | 0.299                          | 2280.33            | 682.81             | 0.072                          | 1610.79            | 115.87             |
| A_68_P21122321 | chr2:33436455-33436499                            | NM_010725:59555     | Lmx1b         | INSIDE                 | 0.240                                                        | 0.472                          | 1498.85            | 707.39             | 0.113                          | 1062.56            | 120.34             |
| A_68_P20624273 | chr1:134776795-134776839                          | NM_010732:-115      | Lrrn2         | PROMOTER               | 0.240                                                        | 0.656                          | 1544.42            | 1013.26            | 0.157                          | 1141.21            | 179.35             |
| A_68_P28504589 | chr12:68321801-68321851                           | NM_001193266:1710   | Mdga2         | INSIDE                 | 0.240                                                        | 0.598                          | 1030.45            | 616.64             | 0.144                          | 804.32             | 115.52             |
| A_68_P30344756 | chr15:75724658-75724702                           | NM_172607:231       | Naprt1        | INSIDE                 | 0.240                                                        | 0.606                          | 3756.08            | 2274.42            | 0.145                          | 2887.78            | 419.72             |
| A_68_P25578925 | chr7:146771094-146771138                          | NR_027857:-2420     | Nkx6-2        | PROMOTER               | 0.240                                                        | 0.634                          | 1013.49            | 642.24             | 0.152                          | 773.00             | 117.77             |

| ProbeName      | Target position of probe on CpG island microarray | TargetID                | GeneSymbol    | CpG island Description | Ratio of relative methylation (TiO <sub>2</sub> -NP/Vehicle) | Sham group                     |                    |                    | TiO <sub>2</sub> -H group      |                    |                    |
|----------------|---------------------------------------------------|-------------------------|---------------|------------------------|--------------------------------------------------------------|--------------------------------|--------------------|--------------------|--------------------------------|--------------------|--------------------|
|                |                                                   |                         |               |                        |                                                              | Relative methylation (Cy5/Cy3) | Cy3 signal (Input) | Cy5 signal (MeDIP) | Relative methylation (Cy5/Cy3) | Cy3 signal (Input) | Cy5 signal (MeDIP) |
| A_68_P30656618 | chr16:33185004-33185048                           | NM_176840:-130          | Osbpl11       | PROMOTER               | 0.240                                                        | 0.654                          | 1195.62            | 782.21             | 0.157                          | 877.80             | 137.67             |
| A_68_P23618576 | chr5:38668524-38668568                            | NM_172709:-96           | Otop1         | PROMOTER               | 0.240                                                        | 0.573                          | 2753.29            | 1577.43            | 0.137                          | 2031.58            | 279.02             |
| A_68_P24808212 | chr6:122289513-122289557                          | NM_001042623:-2501      | Pbc1          | PROMOTER               | 0.240                                                        | 0.588                          | 3941.43            | 2316.93            | 0.141                          | 2493.67            | 351.46             |
| A_68_P24992435 | chr7:19864459-19864503                            | NM_177691:918           | Ppm1n         | INSIDE                 | 0.240                                                        | 0.634                          | 2121.13            | 1345.56            | 0.152                          | 1615.66            | 246.37             |
| A_68_P24933419 | chr6:147212900-147212944                          | NM_008970:-315          | Pthlh         | PROMOTER               | 0.240                                                        | 0.597                          | 1054.80            | 629.68             | 0.143                          | 825.32             | 118.20             |
| A_68_P21838403 | chr2:167758113-167758157                          | NM_011201:308           | Ptpn1         | INSIDE                 | 0.240                                                        | 0.639                          | 2010.74            | 1284.23            | 0.153                          | 1447.22            | 221.38             |
| A_68_P26595983 | chr9:66767400-66767448                            | NM_173413:88            | Rab8b         | INSIDE                 | 0.240                                                        | 0.492                          | 1447.64            | 712.61             | 0.118                          | 997.94             | 117.73             |
| A_68_P27926646 | chr11:75344654-75344698                           | NM_001199284:-519       | Slc43a2       | PROMOTER               | 0.240                                                        | 0.383                          | 1726.94            | 661.76             | 0.092                          | 1306.77            | 120.23             |
| A_68_P28578880 | chr12:82128213-82128257                           | NM_001146217:440        | Smoc1         | INSIDE                 | 0.240                                                        | 0.443                          | 1418.74            | 628.52             | 0.106                          | 1109.31            | 117.80             |
| A_68_P27942517 | chr11:78114890-78114934                           | NM_017407:-180          | Spag5         | PROMOTER               | 0.240                                                        | 0.552                          | 2688.70            | 1483.43            | 0.132                          | 2027.92            | 268.46             |
| A_68_P20456744 | chr1:95532440-95532484                            | NM_021537:-158          | Stk25         | PROMOTER               | 0.240                                                        | 0.551                          | 2664.75            | 1468.30            | 0.132                          | 1994.89            | 264.16             |
| A_68_P24160097 | chr5:144984259-144984304                          | NM_027410:166           | Tecpr1        | INSIDE                 | 0.240                                                        | 0.586                          | 2682.15            | 1571.99            | 0.141                          | 1836.21            | 258.47             |
| A_68_P27188402 | chr10:62350034-62350078                           | NM_027384:-7294         | Tet1          | PROMOTER               | 0.240                                                        | 0.498                          | 1184.98            | 590.54             | 0.119                          | 979.41             | 116.97             |
| A_68_P28326654 | chr12:31269275-31269319                           | NM_172049:-11           | Tmem18        | PROMOTER               | 0.240                                                        | 0.441                          | 2546.94            | 1123.07            | 0.106                          | 1977.26            | 209.37             |
| A_68_P22168170 | chr3:58220169-58220213                            | NM_001081229:580        | Tsc22d2       | INSIDE                 | 0.240                                                        | 0.426                          | 1533.22            | 653.35             | 0.102                          | 1154.07            | 117.94             |
| A_68_P28356086 | chr12:36768656-36768700                           | NM_025359:387           | Tspan13       | INSIDE                 | 0.240                                                        | 0.624                          | 4176.37            | 2605.91            | 0.150                          | 3185.85            | 477.85             |
| A_68_P26232299 | chr8:124808193-124808241                          | NM_009569:2176          | Zfpml         | INSIDE                 | 0.240                                                        | 0.490                          | 1186.44            | 581.57             | 0.118                          | 988.73             | 116.35             |
| A_68_P24641621 | chr6:91793458-91793502                            |                         |               | Unknown                | 0.240                                                        | 0.443                          | 1890.14            | 837.97             | 0.106                          | 1569.51            | 166.74             |
| A_68_P26710496 | chr9:88417635-88417683                            | ENSMUST00000097243:-952 |               | PROMOTER               | 0.240                                                        | 0.625                          | 993.59             | 621.25             | 0.150                          | 811.46             | 121.80             |
| A_68_P23754560 | chr5:65499168-65499212                            | ENSMUST00000101192:384  |               | PROMOTER               | 0.240                                                        | 0.489                          | 1293.39            | 632.28             | 0.117                          | 1090.80            | 128.00             |
| A_68_P25952415 | chr8:73046804-73046848                            | NM_029366:253           | 2810422J05Rik | INSIDE                 | 0.239                                                        | 0.593                          | 3218.37            | 1908.33            | 0.142                          | 2295.64            | 325.10             |
| A_68_P26085412 | chr8:98330809-98330853                            | NR_015574:101           | 4930513N10Rik | INSIDE                 | 0.239                                                        | 0.528                          | 1077.22            | 569.02             | 0.126                          | 955.36             | 120.83             |
| A_68_P22900663 | chr4:48552940-48552986                            | NM_028137:-408          | 5730528L13Rik | PROMOTER               | 0.239                                                        | 0.632                          | 924.22             | 584.41             | 0.151                          | 784.92             | 118.41             |
| A_68_P24455806 | chr6:53237701-53237745                            | NR_015553:434           | 9430076C15Rik | INSIDE                 | 0.239                                                        | 0.670                          | 2243.97            | 1503.01            | 0.160                          | 1827.15            | 292.91             |
| A_68_P24330604 | chr6:30126170-30126214                            | NR_038124:-430          | BB283400      | DIVERGENT_PROMOTER     | 0.239                                                        | 0.436                          | 2105.06            | 916.86             | 0.104                          | 1573.25            | 163.47             |
| A_68_P27352991 | chr10:92773177-92773221                           | NM_013508:706           | Elk3          | INSIDE                 | 0.239                                                        | 0.659                          | 956.91             | 630.54             | 0.157                          | 775.26             | 121.84             |
| A_68_P21771129 | chr2:156247015-156247059                          | NM_001003815:249        | Epb4.111      | INSIDE                 | 0.239                                                        | 0.591                          | 3749.62            | 2215.37            | 0.141                          | 2627.74            | 370.51             |
| A_68_P31111041 | chr17:26698638-26698682                           | NM_026170:204           | Ergic1        | INSIDE                 | 0.239                                                        | 0.443                          | 1959.41            | 868.94             | 0.106                          | 1422.68            | 150.48             |
| A_68_P28340239 | chr12:33832233-33832277                           | NR_015602:197           | F730043M19Rik | INSIDE                 | 0.239                                                        | 0.626                          | 1297.81            | 812.88             | 0.150                          | 996.94             | 149.17             |
| A_68_P25496221 | chr7:132850823-132850867                          | NM_207239:358           | Gtf3e1        | INSIDE                 | 0.239                                                        | 0.572                          | 4038.57            | 2311.41            | 0.137                          | 2902.89            | 397.17             |
| A_68_P27827764 | chr11:57644954-57644998                           | NM_008213:673           | Hand1         | INSIDE                 | 0.239                                                        | 0.588                          | 1092.67            | 642.27             | 0.140                          | 841.67             | 118.22             |
| A_68_P22348542 | chr3:96073837-96073891                            | NM_175666:242           | Hist2h2bb     | INSIDE                 | 0.239                                                        | 0.591                          | 1160.04            | 685.08             | 0.141                          | 867.97             | 122.58             |
| A_68_P21338806 | chr2:74526046-74526090                            | NM_013554:-3936         | Hoxd10        | PROMOTER               | 0.239                                                        | 0.685                          | 2057.06            | 1409.00            | 0.164                          | 1567.47            | 257.10             |
| A_68_P32746463 | chrX:148237989-148238033                          | NM_021523:186           | Huwe1         | INSIDE                 | 0.239                                                        | 1.935                          | 1360.84            | 2633.43            | 0.463                          | 563.26             | 260.79             |
| A_68_P26695696 | chr9:85642551-85642595                            | NM_001081282:369        | Ibtk          | INSIDE                 | 0.239                                                        | 0.442                          | 1600.14            | 707.26             | 0.106                          | 1319.07            | 139.30             |
| A_68_P24182269 | chr5:149740788-149740832                          | NM_153572:-587          | Katnal1       | PROMOTER               | 0.239                                                        | 0.629                          | 985.18             | 620.05             | 0.151                          | 799.08             | 120.28             |
| A_68_P30491859 | chr15:101269185-101269229                         | NM_001003668:29         | Krt83         | INSIDE                 | 0.239                                                        | 0.535                          | 2013.72            | 1078.12            | 0.128                          | 1424.27            | 182.29             |
| A_68_P25484148 | chr7:130521551-130521596                          | NM_025304:78            | Lcm1          | INSIDE                 | 0.239                                                        | 0.470                          | 1227.30            | 577.17             | 0.112                          | 1032.20            | 115.86             |
| A_68_P24126717 | chr5:138070748-138070792                          | NM_001168652:420        | Lrch4         | INSIDE                 | 0.239                                                        | 0.619                          | 3670.65            | 2271.46            | 0.148                          | 2544.93            | 377.02             |
| A_68_P21794484 | chr2:160191502-160191546                          | NM_010658:1277          | Mafb          | INSIDE                 | 0.239                                                        | 0.575                          | 1209.16            | 695.07             | 0.137                          | 908.40             | 124.75             |
| A_68_P27835445 | chr11:59016315-59016359                           | NM_026035:318           | Mrpl55        | INSIDE                 | 0.239                                                        | 0.638                          | 825.75             | 526.60             | 0.153                          | 794.02             | 121.16             |
| A_68_P21419237 | chr2:90687518-90687562                            | NM_019758:229           | Mtch2         | INSIDE                 | 0.239                                                        | 0.403                          | 1534.02            | 617.76             | 0.096                          | 1247.03            | 120.04             |
| A_68_P20823476 | chr1:172519433-172519477                          | NM_001109985:526        | Noslap        | INSIDE                 | 0.239                                                        | 0.668                          | 1001.56            | 668.97             | 0.160                          | 765.96             | 122.22             |
| A_68_P32134211 | chr19:44831069-44831120                           | NM_011037:-789          | Pax2          | PROMOTER               | 0.239                                                        | 0.579                          | 1189.72            | 869.32             | 0.138                          | 867.34             | 120.06             |
| A_68_P30397292 | chr15:84684469-84684513                           | NM_001081166:2069       | Phf21b        | INSIDE                 | 0.239                                                        | 0.669                          | 978.25             | 654.78             | 0.160                          | 764.34             | 122.42             |
| A_68_P27942688 | chr11:78142334-78142378                           | NM_201406:433           | Pigs          | INSIDE                 | 0.239                                                        | 0.704                          | 1187.31            | 835.77             | 0.168                          | 891.88             | 149.88             |
| A_68_P32142315 | chr19:46223136-46223180                           | NM_008852:-343          | Pitx3         | DIVERGENT_PROMOTER     | 0.239                                                        | 0.409                          | 1947.09            | 796.59             | 0.098                          | 1441.84            | 140.82             |
| A_68_P27901225 | chr11:70354037-70354081                           | NM_008876:393           | Plid2         | INSIDE                 | 0.239                                                        | 0.674                          | 1192.74            | 803.98             | 0.161                          | 959.31             | 154.27             |
| A_68_P31415139 | chr17:86567438-86567482                           | NM_011104:336           | Prkce         | INSIDE                 | 0.239                                                        | 0.696                          | 1353.34            | 941.55             | 0.167                          | 1035.38            | 172.52             |
| A_68_P25017607 | chr7:28293097-28293141                            | NM_019412:8776          | Prx           | INSIDE                 | 0.239                                                        | 0.704                          | 2034.55            | 1431.90            | 0.168                          | 1479.08            | 249.09             |
| A_68_P23597153 | chr5:35292578-35292624                            | NM_173402:504           | Rgs12         | INSIDE                 | 0.239                                                        | 1.933                          | 751.95             | 1453.25            | 0.463                          | 581.31             | 268.95             |

| ProbeName      | Target position of probe on CpG island microarray | TargetID           | GeneSymbol    | CpG island Description | Ratio of relative methylation (TiO <sub>2</sub> -NP/Vehicle) | Sham group                     |                    |                    | TiO <sub>2</sub> -H group      |                    |                    |
|----------------|---------------------------------------------------|--------------------|---------------|------------------------|--------------------------------------------------------------|--------------------------------|--------------------|--------------------|--------------------------------|--------------------|--------------------|
|                |                                                   |                    |               |                        |                                                              | Relative methylation (Cy5/Cy3) | Cy3 signal (Input) | Cy5 signal (MeDIP) | Relative methylation (Cy5/Cy3) | Cy3 signal (Input) | Cy5 signal (MeDIP) |
| A_68_P20391888 | chr1:82313214-82313260                            | NM_029777:83       | Rhbdd1        | INSIDE                 | 0.239                                                        | 0.479                          | 1322.67            | 633.46             | 0.115                          | 1026.43            | 117.54             |
| A_68_P25378791 | chr7:109590355-109590403                          | NM_009103:170      | Rrm1          | INSIDE                 | 0.239                                                        | 0.573                          | 1106.47            | 633.78             | 0.137                          | 878.19             | 120.27             |
| A_68_P23576446 | chr5:31395554-31395598                            | NM_011773:324      | Slc30a3       | INSIDE                 | 0.239                                                        | 0.588                          | 2122.58            | 1248.39            | 0.140                          | 1595.07            | 224.02             |
| A_68_P30653350 | chr16:32609484-32609540                           | NM_011638:531      | Tfrc          | INSIDE                 | 0.239                                                        | 0.555                          | 1029.36            | 571.46             | 0.132                          | 871.59             | 115.44             |
| A_68_P28536527 | chr12:74387503-74387547                           | NM_029580:174      | Trmt5         | INSIDE                 | 0.239                                                        | 0.548                          | 1058.22            | 579.94             | 0.131                          | 899.35             | 117.74             |
| A_68_P27056229 | chr10:34017638-34017682                           | NM_030203:434      | Tspyl4        | INSIDE                 | 0.239                                                        | 0.614                          | 1028.06            | 631.73             | 0.147                          | 805.14             | 118.10             |
| A_68_P26809576 | chr9:107465904-107465952                          | NM_019742:343      | Tusc2         | INSIDE                 | 0.239                                                        | 0.642                          | 1442.79            | 925.64             | 0.154                          | 1125.52            | 172.87             |
| A_68_P30147669 | chr15:38007832-38007883                           | NM_001081359:751   | Ubr5          | INSIDE                 | 0.239                                                        | 0.477                          | 1329.57            | 633.72             | 0.114                          | 1067.81            | 121.71             |
| A_68_P20935543 | chr1:192802468-192802514                          | NM_144879:387      | Vash2         | INSIDE                 | 0.239                                                        | 0.557                          | 1140.56            | 635.48             | 0.133                          | 899.07             | 119.93             |
| A_68_P24057208 | chr5:124170620-124170665                          | NM_027494:411      | Zecch8        | INSIDE                 | 0.239                                                        | 0.479                          | 1258.50            | 602.59             | 0.115                          | 1007.44            | 115.37             |
| A_68_P27899662 | chr11:70051263-70051307                           | NM_001177601:132   | 0610010K14Rik | INSIDE                 | 0.238                                                        | 0.356                          | 1752.37            | 623.05             | 0.085                          | 1486.63            | 125.86             |
| A_68_P25089660 | chr7:52104564-52104618                            | NM_026270:-6       | Akt1s1        | DIVERGENT_PROMOTER     | 0.238                                                        | 0.600                          | 1141.66            | 685.17             | 0.143                          | 811.48             | 115.94             |
| A_68_P21421623 | chr2:91105084-91105140                            | NM_001166024:-159  | Arfgap2       | PROMOTER               | 0.238                                                        | 0.543                          | 1243.22            | 674.75             | 0.129                          | 926.35             | 119.58             |
| A_68_P27892699 | chr11:68853816-68853860                           | NM_011496:-5306    | Aurkb         | PROMOTER               | 0.238                                                        | 0.632                          | 1137.73            | 718.78             | 0.150                          | 817.33             | 122.66             |
| A_68_P24330603 | chr6:30126052-30126101                            | NR_038124:-546     | BB283400      | DIVERGENT_PROMOTER     | 0.238                                                        | 0.596                          | 1088.84            | 649.41             | 0.142                          | 830.48             | 118.00             |
| A_68_P27987617 | chr11:86015036-86015080                           | NM_178309:-363     | Brip1         | PROMOTER               | 0.238                                                        | 0.550                          | 2619.06            | 1439.79            | 0.131                          | 2060.48            | 270.07             |
| A_68_P27902011 | chr11:70483347-70483401                           | NM_001190376:18233 | Camta2        | INSIDE                 | 0.238                                                        | 1.484                          | 1534.86            | 2277.19            | 0.353                          | 1109.53            | 392.16             |
| A_68_P27980571 | chr11:84771814-84771858                           | NM_007607:581      | Car4          | INSIDE                 | 0.238                                                        | 0.464                          | 1397.64            | 648.16             | 0.110                          | 1205.84            | 132.91             |
| A_68_P31125930 | chr17:29232003-29232047                           | NM_007669:1308     | Cdkn1a        | INSIDE                 | 0.238                                                        | 0.614                          | 2904.24            | 1782.82            | 0.146                          | 2167.87            | 316.25             |
| A_68_P32287120 | chrX:19637562-19637606                            | NM_021715:889      | Chst7         | INSIDE                 | 0.238                                                        | 1.576                          | 1428.99            | 2251.80            | 0.375                          | 622.90             | 233.31             |
| A_68_P25951454 | chr8:72900470-72900514                            | NM_016685:3046     | Comp          | INSIDE                 | 0.238                                                        | 0.641                          | 2556.74            | 1640.01            | 0.153                          | 1812.97            | 277.27             |
| A_68_P25776095 | chr8:35872064-35872108                            | NM_176933:1423     | Dusp4         | INSIDE                 | 0.238                                                        | 0.666                          | 1972.23            | 1312.54            | 0.158                          | 1699.59            | 268.82             |
| A_68_P27826627 | chr11:57458543-57458587                           | NM_134189:-379     | Galnt10       | PROMOTER               | 0.238                                                        | 0.571                          | 1133.39            | 647.50             | 0.136                          | 886.24             | 120.53             |
| A_68_P25033089 | chr7:31514898-31514944                            | NM_008085:9455     | Gapdh5        | INSIDE                 | 0.238                                                        | 0.571                          | 1186.52            | 677.36             | 0.136                          | 875.44             | 118.81             |
| A_68_P25890515 | chr8:59799750-59799801                            | NM_010402:-4       | Hand2         | PROMOTER               | 0.238                                                        | 0.673                          | 1746.30            | 1175.90            | 0.160                          | 1357.53            | 217.41             |
| A_68_P27497666 | chr10:119912069-119912113                         | NM_010441:1901     | Hmga2         | INSIDE                 | 0.238                                                        | 0.459                          | 2402.95            | 1102.85            | 0.109                          | 1805.91            | 197.24             |
| A_68_P21901451 | chr2:179838159-179838203                          | NM_133849:747      | Hrh3          | INSIDE                 | 0.238                                                        | 0.507                          | 1884.94            | 955.40             | 0.121                          | 1411.15            | 170.36             |
| A_68_P26809621 | chr9:107471601-107471645                          | NM_010489:129      | Hyal2         | INSIDE                 | 0.238                                                        | 0.650                          | 1680.29            | 1091.95            | 0.155                          | 1121.80            | 173.51             |
| A_68_P29484669 | chr14:27852875-27852920                           | NM_134437:711      | Il17rd        | INSIDE                 | 0.238                                                        | 0.594                          | 1284.13            | 763.21             | 0.142                          | 940.23             | 133.05             |
| A_68_P29134820 | chr13:72768352-72768396                           | NM_010574:1949     | Irx2          | INSIDE                 | 0.238                                                        | 0.681                          | 1921.84            | 1308.10            | 0.162                          | 1670.26            | 270.98             |
| A_68_P26531858 | chr9:55388757-55388801                            | NM_027397:-177     | Isl2          | PROMOTER               | 0.238                                                        | 0.401                          | 1516.64            | 608.33             | 0.096                          | 1249.83            | 119.39             |
| A_68_P29630112 | chr14:58445036-58445080                           | NM_026401:-17      | Mrp63         | DIVERGENT_PROMOTER     | 0.238                                                        | 0.635                          | 987.47             | 627.24             | 0.151                          | 835.14             | 126.44             |
| A_68_P27558533 | chr11:4494164-4494208                             | NM_028860:632      | Mtmr3         | INSIDE                 | 0.238                                                        | 0.635                          | 1033.93            | 656.51             | 0.151                          | 815.70             | 123.39             |
| A_68_P28052462 | chr11:97605811-97605862                           | NM_054051:182      | Pip4k2b       | INSIDE                 | 0.238                                                        | 0.493                          | 1477.68            | 728.81             | 0.117                          | 1019.80            | 119.71             |
| A_68_P27630334 | chr11:20101506-20101552                           | NM_008996:-76      | Rab1          | PROMOTER               | 0.238                                                        | 0.669                          | 2440.74            | 1632.71            | 0.159                          | 1960.15            | 312.42             |
| A_68_P30496840 | chr15:102077921-102077968                         | NM_001042727:-1161 | Rarg          | PROMOTER               | 0.238                                                        | 0.454                          | 1342.61            | 609.51             | 0.108                          | 1082.86            | 116.92             |
| A_68_P28149048 | chr11:114530351-114530395                         | NM_001048058:278   | Rpl38         | INSIDE                 | 0.238                                                        | 0.607                          | 1349.48            | 819.36             | 0.145                          | 1087.82            | 157.45             |
| A_68_P29620554 | chr14:56519301-56519352                           | NM_001082975:-257  | Sdr39u1       | PROMOTER               | 0.238                                                        | 0.523                          | 1255.69            | 657.31             | 0.124                          | 952.39             | 118.51             |
| A_68_P23698174 | chr5:53440423-53440467                            | NM_011402:-147     | Slc34a2       | PROMOTER               | 0.238                                                        | 0.704                          | 1995.35            | 1404.58            | 0.167                          | 1649.27            | 276.23             |
| A_68_P22032968 | chr3:31208905-31208949                            | NM_172861:315      | Slc7a14       | INSIDE                 | 0.238                                                        | 0.438                          | 1510.22            | 661.38             | 0.104                          | 1201.77            | 125.33             |
| A_68_P28042071 | chr11:95896081-95896125                           | NM_033568:-128     | Snf8          | PROMOTER               | 0.238                                                        | 0.480                          | 1180.69            | 567.05             | 0.114                          | 1023.13            | 117.03             |
| A_68_P27365032 | chr10:94878721-94878765                           | NM_001168656:-624  | Socs2         | PROMOTER               | 0.238                                                        | 0.542                          | 1075.34            | 582.41             | 0.129                          | 951.34             | 122.87             |
| A_68_P28137824 | chr11:112643225-112643274                         | NM_011448:-274     | Sox9          | PROMOTER               | 0.238                                                        | 0.598                          | 1143.53            | 683.66             | 0.142                          | 851.53             | 121.00             |
| A_68_P27780097 | chr11:48630503-48630547                           | NM_145377:369      | Trim41        | INSIDE                 | 0.238                                                        | 0.608                          | 3970.23            | 2413.06            | 0.144                          | 3080.04            | 444.73             |
| A_68_P25358180 | chr7:105983274-105983321                          | NM_009519:-4057    | Wnt11         | PROMOTER               | 0.238                                                        | 0.690                          | 1387.69            | 958.00             | 0.164                          | 1012.62            | 166.19             |
| A_68_P24057206 | chr5:124170389-124170437                          | NM_027494:641      | Zecch8        | INSIDE                 | 0.238                                                        | 0.470                          | 1373.75            | 645.48             | 0.112                          | 1055.47            | 117.79             |
| A_68_P31323658 | chr17:69731780-69731824                           | NM_009547:-1515    | Zfp161        | PROMOTER               | 0.238                                                        | 0.587                          | 1532.71            | 899.39             | 0.140                          | 1122.30            | 156.80             |
| A_68_P23577059 | chr5:31504739-31504783                            | NM_175311:-84      | Zfp513        | PROMOTER               | 0.238                                                        | 0.402                          | 1702.97            | 685.42             | 0.096                          | 1268.39            | 121.69             |
| A_68_P25500990 | chr7:133679747-133679791                          |                    | Unknown       |                        | 0.238                                                        | 0.665                          | 1417.85            | 943.47             | 0.159                          | 1145.32            | 181.71             |
| A_68_P30958535 | chr16:90727405-90727449                           | NM_025642:190      | 2610039C10Rik | INSIDE                 | 0.237                                                        | 0.541                          | 1226.40            | 663.48             | 0.128                          | 955.47             | 122.43             |
| A_68_P26171282 | chr8:114516157-114516201                          | NM_013925:24       | Adat1         | INSIDE                 | 0.237                                                        | 0.667                          | 1148.20            | 765.53             | 0.158                          | 900.57             | 142.08             |

| ProbeName      | Target position of probe on CpG island microarray | TargetID           | GeneSymbol | CpG island Description | Ratio of relative methylation (TiO <sub>2</sub> -NP/Vehicle) | Sham group                     |                    |                    | TiO <sub>2</sub> -H group      |                    |                    |
|----------------|---------------------------------------------------|--------------------|------------|------------------------|--------------------------------------------------------------|--------------------------------|--------------------|--------------------|--------------------------------|--------------------|--------------------|
|                |                                                   |                    |            |                        |                                                              | Relative methylation (Cy5/Cy3) | Cy3 signal (Input) | Cy5 signal (MeDIP) | Relative methylation (Cy5/Cy3) | Cy3 signal (Input) | Cy5 signal (MeDIP) |
| A_68_P25833743 | chr8:47085442-47085486                            | NM_001039562:-260  | Ankrd37    | PROMOTER               | 0.237                                                        | 0.688                          | 2837.34            | 1953.45            | 0.163                          | 2115.47            | 345.86             |
| A_68_P26818135 | chr9:108976311-108976355                          | NM_172774:306      | Atrip      | INSIDE                 | 0.237                                                        | 0.444                          | 1435.34            | 637.57             | 0.105                          | 1131.70            | 119.01             |
| A_68_P31157811 | chr17:35271987-35272046                           | NM_057171:-170     | Bag6       | DIVERGENT_PROMOTER     | 0.237                                                        | 0.590                          | 913.18             | 538.76             | 0.140                          | 835.90             | 116.77             |
| A_68_P30605853 | chr16:23983382-23983426                           | NM_009744:5294     | Bcl6       | INSIDE                 | 0.237                                                        | 0.545                          | 1598.52            | 870.94             | 0.129                          | 1300.39            | 168.24             |
| A_68_P23151263 | chr4:100450587-100450631                          | NM_198037:1325     | Cachd1     | INSIDE                 | 0.237                                                        | 0.653                          | 1046.97            | 683.68             | 0.155                          | 777.29             | 120.27             |
| A_68_P30588542 | chr16:20622241-20622285                           | NM_028420:-911     | Camk2n2    | DIVERGENT_PROMOTER     | 0.237                                                        | 0.583                          | 1427.54            | 831.71             | 0.138                          | 1042.94            | 143.75             |
| A_68_P26139991 | chr8:109031801-109031850                          | NM_007665:-2965    | Cdh3       | PROMOTER               | 0.237                                                        | 0.584                          | 1016.71            | 593.83             | 0.138                          | 846.48             | 117.03             |
| A_68_P23005998 | chr4:70071674-70071724                            | NM_145990:-297     | Cdk5rap2   | PROMOTER               | 0.237                                                        | 0.622                          | 916.61             | 570.54             | 0.147                          | 803.27             | 118.31             |
| A_68_P30978142 | chr16:93884445-93884489                           | NM_028083:321      | Chaf1b     | INSIDE                 | 0.237                                                        | 0.529                          | 2334.30            | 1234.14            | 0.126                          | 1707.44            | 214.36             |
| A_68_P21569027 | chr2:119148109-119148156                          | NM_019454:-3387    | Dll4       | PROMOTER               | 0.237                                                        | 0.551                          | 1196.58            | 659.25             | 0.131                          | 921.33             | 120.35             |
| A_68_P23226802 | chr4:115612163-115612209                          | NM_001025567:345   | Dmbx1      | INSIDE                 | 0.237                                                        | 0.694                          | 1164.16            | 808.42             | 0.164                          | 882.65             | 145.18             |
| A_68_P30378506 | chr15:81416769-81416813                           | NM_177821:147      | Epf300     | INSIDE                 | 0.237                                                        | 0.499                          | 2553.78            | 1274.79            | 0.118                          | 1810.22            | 214.05             |
| A_68_P29996485 | chr15:7761244-7761297                             | NM_010275:260      | Gdnf       | INSIDE                 | 0.237                                                        | 0.607                          | 1081.00            | 655.95             | 0.144                          | 811.07             | 116.54             |
| A_68_P21438070 | chr2:93797249-93797293                            | NM_001145034:-13   | Gm13889    | PROMOTER               | 0.237                                                        | 0.404                          | 1890.71            | 763.41             | 0.096                          | 1359.35            | 130.06             |
| A_68_P21311538 | chr2:69723596-69723640                            | NM_029280:43       | Mettl5     | INSIDE                 | 0.237                                                        | 0.361                          | 1892.72            | 683.01             | 0.086                          | 1449.82            | 124.08             |
| A_68_P26082840 | chr8:97877404-97877448                            | NM_008609:1190     | Mmp15      | INSIDE                 | 0.237                                                        | 0.581                          | 1182.59            | 687.06             | 0.137                          | 876.63             | 120.49             |
| A_68_P26668158 | chr9:80012869-80012913                            | NM_001039546:50    | Myo6       | INSIDE                 | 0.237                                                        | 0.485                          | 1414.70            | 685.63             | 0.115                          | 1096.58            | 125.96             |
| A_68_P25535541 | chr7:139791496-139791540                          | NM_009123:-198     | Nkx1-2     | PROMOTER               | 0.237                                                        | 0.396                          | 1501.30            | 595.07             | 0.094                          | 1264.16            | 118.71             |
| A_68_P22347475 | chr3:95908828-95908872                            | NM_001025613:401   | Otd7b      | INSIDE                 | 0.237                                                        | 0.639                          | 4257.97            | 2719.83            | 0.151                          | 2976.07            | 449.84             |
| A_68_P20474865 | chr1:99991588-99991632                            | NM_013626:599      | Pam        | INSIDE                 | 0.237                                                        | 0.516                          | 2373.73            | 1225.88            | 0.123                          | 1819.31            | 222.91             |
| A_68_P26573403 | chr9:62828953-62828997                            | NM_019663:-288     | Pias1      | PROMOTER               | 0.237                                                        | 0.442                          | 2496.30            | 1103.02            | 0.105                          | 2046.95            | 214.24             |
| A_68_P30346979 | chr15:76063160-76063204                           | NM_001163542:-1374 | Plec       | PROMOTER               | 0.237                                                        | 0.575                          | 1117.57            | 642.64             | 0.136                          | 991.08             | 134.88             |
| A_68_P25502251 | chr7:133935372-133935418                          | NM_019674:591      | Ppp4c      | INSIDE                 | 0.237                                                        | 0.573                          | 1612.56            | 924.09             | 0.136                          | 1215.37            | 164.85             |
| A_68_P26714905 | chr9:89805194-89805241                            | NM_001039655:605   | Rasgrf1    | INSIDE                 | 0.237                                                        | 0.593                          | 1021.30            | 605.32             | 0.141                          | 834.71             | 117.30             |
| A_68_P28291145 | chr12:25393139-25393183                           | NM_009104:42       | Rrm2       | INSIDE                 | 0.237                                                        | 0.429                          | 2583.12            | 1107.31            | 0.101                          | 1970.28            | 199.87             |
| A_68_P20632245 | chr1:136131391-136131435                          | NM_001008533:592   | Adora1     | INSIDE                 | 0.236                                                        | 0.724                          | 3114.22            | 2255.32            | 0.171                          | 2208.47            | 377.27             |
| A_68_P27257133 | chr10:75023101-75023145                           | NM_198860:-47      | Alf46023   | PROMOTER               | 0.236                                                        | 0.516                          | 1623.55            | 837.00             | 0.122                          | 1313.90            | 160.10             |
| A_68_P22346233 | chr3:95698306-95698355                            | NM_146134:353      | Aph1a      | INSIDE                 | 0.236                                                        | 0.541                          | 1344.79            | 728.00             | 0.128                          | 960.83             | 122.67             |
| A_68_P22695195 | chr4:3866261-3866305                              | NM_001190322:222   | Chchd7     | INSIDE                 | 0.236                                                        | 0.518                          | 3915.50            | 2027.86            | 0.122                          | 2828.14            | 344.95             |
| A_68_P23401329 | chr4:148961308-148961352                          | NM_023051:584      | C1stn1     | INSIDE                 | 0.236                                                        | 1.777                          | 8284.43            | 14721.64           | 0.420                          | 5276.83            | 2216.45            |
| A_68_P23270838 | chr4:124558750-124558797                          | NM_177671:-255     | Epha10     | PROMOTER               | 0.236                                                        | 0.601                          | 981.03             | 589.78             | 0.142                          | 821.39             | 116.53             |
| A_68_P24397654 | chr6:42274034-42274078                            | NM_001113327:583   | Fam131b    | INSIDE                 | 0.236                                                        | 0.478                          | 2129.41            | 1016.84            | 0.112                          | 1648.23            | 185.38             |
| A_68_P24991622 | chr7:19717039-19717083                            | NM_175530:11853    | Fbxo46     | INSIDE                 | 0.236                                                        | 0.705                          | 1814.17            | 1279.23            | 0.167                          | 1475.60            | 245.86             |
| A_68_P31677416 | chr18:46685866-46685910                           | NM_173423:-263     | Fem1c      | PROMOTER               | 0.236                                                        | 0.603                          | 997.57             | 601.92             | 0.142                          | 856.38             | 121.70             |
| A_68_P20644875 | chr1:138156699-138156743                          | NM_001101516:730   | Gpr25      | INSIDE                 | 0.236                                                        | 0.409                          | 2461.74            | 1005.72            | 0.096                          | 1911.15            | 184.04             |
| A_68_P28684630 | chr12:102137196-102137240                         | NM_001177674:516   | Gpr68      | INSIDE                 | 0.236                                                        | 0.446                          | 1366.00            | 609.35             | 0.105                          | 1112.33            | 117.31             |
| A_68_P24449350 | chr6:52190240-52190299                            | NM_008263:-5331    | Hoxa10     | PROMOTER               | 0.236                                                        | 0.485                          | 1311.09            | 636.18             | 0.114                          | 1053.10            | 120.41             |
| A_68_P24448784 | chr6:52122568-52122612                            | NM_010452:40476    | Hoxa3      | INSIDE                 | 0.236                                                        | 0.633                          | 1727.18            | 1093.31            | 0.149                          | 1299.10            | 193.89             |
| A_68_P26528146 | chr9:54711666-54711710                            | NM_022655:127      | Ireb2      | INSIDE                 | 0.236                                                        | 0.537                          | 2123.00            | 1139.14            | 0.127                          | 1638.59            | 207.48             |
| A_68_P26022960 | chr8:87502192-87502236                            | NM_008416:433      | Junb       | INSIDE                 | 0.236                                                        | 0.503                          | 1916.97            | 964.93             | 0.119                          | 1434.02            | 170.04             |
| A_68_P24038702 | chr5:120885755-120885799                          | NM_008499:3882     | Lhx5       | INSIDE                 | 0.236                                                        | 0.574                          | 2246.26            | 1288.75            | 0.135                          | 1720.35            | 232.70             |
| A_68_P21767513 | chr2:155601572-155601616                          | NM_010808:515      | Mmp24      | INSIDE                 | 0.236                                                        | 1.833                          | 7977.50            | 14624.27           | 0.433                          | 5165.28            | 2239.08            |
| A_68_P30784592 | chr16:57167576-57167629                           | NM_023175:-157     | Nit2       | PROMOTER               | 0.236                                                        | 0.637                          | 1034.90            | 659.23             | 0.150                          | 801.68             | 120.37             |
| A_68_P23637424 | chr5:42155451-42155459                            | NM_007524:23       | Nkx3-2     | INSIDE                 | 0.236                                                        | 0.668                          | 5005.43            | 3344.39            | 0.158                          | 3885.17            | 612.69             |
| A_68_P30961642 | chr16:91220360-91220404                           | NM_016967:-5412    | Olig2      | PROMOTER               | 0.236                                                        | 0.632                          | 1864.85            | 1177.71            | 0.149                          | 1449.49            | 215.84             |
| A_68_P23184553 | chr4:106136681-106136725                          | NM_153565:228      | Pesck9     | INSIDE                 | 0.236                                                        | 0.585                          | 2619.25            | 1531.96            | 0.138                          | 1790.12            | 246.69             |
| A_68_P22405711 | chr3:107135861-107135907                          | NM_001045807:323   | Rbm15      | INSIDE                 | 0.236                                                        | 0.524                          | 1429.53            | 748.48             | 0.123                          | 1113.74            | 137.33             |
| A_68_P22215791 | chr3:68298276-68298322                            | NR_036665:184      | Schp1      | INSIDE                 | 0.236                                                        | 0.512                          | 1328.75            | 680.03             | 0.121                          | 1000.96            | 121.08             |
| A_68_P27940380 | chr11:77744288-77744332                           | NM_021286:-134     | Sez6       | DIVERGENT_PROMOTER     | 0.236                                                        | 0.644                          | 2433.21            | 1565.98            | 0.152                          | 1867.18            | 283.94             |
| A_68_P30550103 | chr16:11983989-11984033                           | NM_001174086:-195  | Shisa9     | PROMOTER               | 0.236                                                        | 0.466                          | 1546.59            | 721.02             | 0.110                          | 1081.69            | 118.95             |
| A_68_P23668871 | chr5:48377683-48377731                            | NM_178804:3313     | Sit2       | INSIDE                 | 0.236                                                        | 0.450                          | 1498.39            | 673.99             | 0.106                          | 1081.97            | 114.74             |

| ProbeName      | Target position of probe on CpG island microarray | TargetID          | GeneSymbol    | CpG island Description | Ratio of relative methylation (TiO <sub>2</sub> -NP/Vehicle) | Sham group                     |                    |                    | TiO <sub>2</sub> -H group      |                    |                    |
|----------------|---------------------------------------------------|-------------------|---------------|------------------------|--------------------------------------------------------------|--------------------------------|--------------------|--------------------|--------------------------------|--------------------|--------------------|
|                |                                                   |                   |               |                        |                                                              | Relative methylation (Cy5/Cy3) | Cy3 signal (Input) | Cy5 signal (MeDIP) | Relative methylation (Cy5/Cy3) | Cy3 signal (Input) | Cy5 signal (MeDIP) |
| A_68_P32401092 | chrX:54645722-54645768                            | NR_002903:-1058   | Snord61       | PROMOTER               | 0.236                                                        | 1.548                          | 1608.93            | 2491.29            | 0.365                          | 688.02             | 251.46             |
| A_68_P28307260 | chr12:28026977-28027021                           | NM_009234:585     | Sox11         | INSIDE                 | 0.236                                                        | 0.492                          | 2068.26            | 1018.46            | 0.116                          | 1588.87            | 184.55             |
| A_68_P21330516 | chr2:73110924-73110977                            | NM_001005343:968  | Sp9           | INSIDE                 | 0.236                                                        | 0.599                          | 1160.10            | 694.45             | 0.142                          | 946.97             | 134.01             |
| A_68_P25952997 | chr8:73135574-73135625                            | NM_133772:-3386   | Ssbp4         | DIVERGENT_PROMOTER     | 0.236                                                        | 0.521                          | 1205.98            | 627.73             | 0.123                          | 1006.37            | 123.76             |
| A_68_P23616979 | chr5:38430477-38430521                            | NM_026959:25      | Stx18         | INSIDE                 | 0.236                                                        | 0.529                          | 2805.20            | 1483.16            | 0.125                          | 2117.72            | 264.34             |
| A_68_P25091864 | chr7:52471284-52471328                            | NM_011565:184     | Tead2         | INSIDE                 | 0.236                                                        | 1.385                          | 3920.49            | 5428.73            | 0.327                          | 2823.33            | 923.91             |
| A_68_P25777210 | chr8:36028138-36028182                            | NM_175091:584     | Tnks          | INSIDE                 | 0.236                                                        | 0.523                          | 3263.36            | 1707.65            | 0.123                          | 2635.24            | 324.98             |
| A_68_P24974296 | chr7:13623790-13623834                            | NM_001168469:-193 | Ube2m         | PROMOTER               | 0.236                                                        | 0.505                          | 1239.19            | 625.40             | 0.119                          | 1003.09            | 119.35             |
| A_68_P25241766 | chr7:82927030-82927082                            |                   |               | Unknown                | 0.236                                                        | 0.604                          | 1072.24            | 647.36             | 0.143                          | 842.83             | 120.17             |
| A_68_P24034670 | chr5:120246491-120246535                          | AK006202:11366    |               | DOWNSTREAM             | 0.236                                                        | 0.689                          | 2481.64            | 1710.16            | 0.163                          | 1890.26            | 307.36             |
| A_68_P22349551 | chr3:96279198-96279254                            | AK136676:11232    |               | DOWNSTREAM             | 0.236                                                        | 2.570                          | 1808.56            | 4648.15            | 0.607                          | 1306.08            | 792.58             |
| A_68_P28595538 | chr12:85292535-85292579                           | NM_023633:999     | 2410016O06Rik | INSIDE                 | 0.235                                                        | 0.678                          | 1223.41            | 829.37             | 0.159                          | 965.04             | 153.78             |
| A_68_P30421419 | chr15:88649879-88649923                           | NM_001142357:-152 | Alg12         | DIVERGENT_PROMOTER     | 0.235                                                        | 0.665                          | 2666.42            | 1773.58            | 0.156                          | 1891.08            | 295.64             |
| A_68_P26764913 | chr9:99469012-99469056                            | NM_028768:284     | Armc8         | INSIDE                 | 0.235                                                        | 0.503                          | 1708.02            | 858.31             | 0.118                          | 1403.53            | 165.42             |
| A_68_P20837653 | chr1:175297800-175297844                          | NM_053199:4       | Cadm3         | INSIDE                 | 0.235                                                        | 0.486                          | 3872.79            | 1882.95            | 0.114                          | 2816.07            | 322.23             |
| A_68_P25458768 | chr7:125676881-125676932                          | NM_009940:-79     | Coq7          | PROMOTER               | 0.235                                                        | 0.623                          | 973.65             | 606.34             | 0.147                          | 802.68             | 117.65             |
| A_68_P21863931 | chr2:172196546-172196590                          | NM_024199:66      | Cstf1         | INSIDE                 | 0.235                                                        | 0.721                          | 2329.05            | 1678.69            | 0.169                          | 1783.98            | 302.07             |
| A_68_P28186829 | chr11:120657297-120657341                         | NM_026824:391     | Dus11         | INSIDE                 | 0.235                                                        | 0.603                          | 1173.52            | 707.97             | 0.142                          | 821.66             | 116.66             |
| A_68_P31982703 | chr19:16947053-16947097                           | NM_008023:1246    | Foxb2         | INSIDE                 | 0.235                                                        | 0.394                          | 1598.16            | 629.53             | 0.093                          | 1266.31            | 117.41             |
| A_68_P22351744 | chr3:96708735-96708782                            | NM_026229:463     | Gpr89         | INSIDE                 | 0.235                                                        | 0.518                          | 1322.86            | 685.78             | 0.122                          | 1099.69            | 133.83             |
| A_68_P28290830 | chr12:25336784-25336828                           | NM_178357:571     | Klfl1         | INSIDE                 | 0.235                                                        | 1.611                          | 1105.43            | 1781.36            | 0.379                          | 863.67             | 326.94             |
| A_68_P24057384 | chr5:124199713-124199761                          | NM_00104242:1     | Kntc1         | INSIDE                 | 0.235                                                        | 0.650                          | 1032.62            | 671.61             | 0.153                          | 791.13             | 120.72             |
| A_68_P24946855 | chr7:3644343-3644387                              | NM_029934:763     | Mboat7        | INSIDE                 | 0.235                                                        | 0.516                          | 2454.88            | 1266.28            | 0.121                          | 2005.03            | 243.01             |
| A_68_P28338223 | chr12:33504900-33504944                           | NM_021524:-277    | Nampt         | PROMOTER               | 0.235                                                        | 0.713                          | 1627.55            | 1160.45            | 0.168                          | 1281.67            | 214.98             |
| A_68_P21345538 | chr2:75542631-75542675                            | NM_010902:46      | Nfe2l2        | INSIDE                 | 0.235                                                        | 1.890                          | 1017.95            | 1923.79            | 0.445                          | 717.11             | 318.98             |
| A_68_P26039502 | chr8:90722771-90722830                            | NM_001164497:-311 | Papd5         | PROMOTER               | 0.235                                                        | 0.596                          | 1067.36            | 635.66             | 0.140                          | 879.73             | 123.07             |
| A_68_P21867220 | chr2:172847673-172847717                          | NM_019547:292     | Rbm38         | INSIDE                 | 0.235                                                        | 0.365                          | 2237.16            | 817.21             | 0.086                          | 1560.60            | 134.19             |
| A_68_P23234667 | chr4:117156923-117156969                          | NM_025739:12574   | Rnf220        | INSIDE                 | 0.235                                                        | 0.434                          | 1231.67            | 533.99             | 0.102                          | 1145.56            | 116.51             |
| A_68_P23313958 | chr4:132324242-132324286                          | NM_011284:-10     | Rpa2          | PROMOTER               | 0.235                                                        | 0.623                          | 1899.16            | 1182.91            | 0.146                          | 1397.23            | 204.59             |
| A_68_P30351090 | chr15:76734597-76734641                           | NM_012053:118     | Rpl8          | INSIDE                 | 0.235                                                        | 1.752                          | 3291.12            | 5766.71            | 0.412                          | 2381.31            | 980.56             |
| A_68_P23080556 | chr4:86221599-86221643                            | NM_178376:44      | Rraga         | INSIDE                 | 0.235                                                        | 0.491                          | 1057.19            | 518.78             | 0.115                          | 995.50             | 114.97             |
| A_68_P23997436 | chr5:113739937-113739981                          | NM_172718:-152    | Sgsm1         | PROMOTER               | 0.235                                                        | 0.668                          | 1154.23            | 770.79             | 0.157                          | 1014.52            | 158.92             |
| A_68_P28938203 | chr13:34437339-34437383                           | NM_001033167:-309 | Stc22a23      | PROMOTER               | 0.235                                                        | 0.671                          | 944.05             | 633.18             | 0.158                          | 787.18             | 124.33             |
| A_68_P30496207 | chr15:101966685-101966729                         | NM_001033277:-60  | Spryd3        | DIVERGENT_PROMOTER     | 0.235                                                        | 0.490                          | 1236.78            | 605.57             | 0.115                          | 1013.36            | 116.77             |
| A_68_P21266386 | chr2:61643664-61643708                            | NM_009322:1177    | Tbr1          | INSIDE                 | 0.235                                                        | 0.370                          | 1751.30            | 648.82             | 0.087                          | 1354.19            | 118.14             |
| A_68_P24946865 | chr7:3645526-3645571                              | NM_024168:-561    | Tsen34        | PROMOTER               | 0.235                                                        | 0.434                          | 1474.09            | 640.26             | 0.102                          | 1181.30            | 120.83             |
| A_68_P28170440 | chr11:118151534-118151578                         | NM_001033528:2    | Usp36         | INSIDE                 | 0.235                                                        | 0.345                          | 1889.19            | 652.00             | 0.081                          | 1482.46            | 120.12             |
| A_68_P30476457 | chr15:98620052-98620096                           | NM_021279:-213    | Wnt1          | PROMOTER               | 0.235                                                        | 0.743                          | 3250.75            | 2414.27            | 0.175                          | 2345.77            | 409.61             |
| A_68_P22963156 | chr4:61869252-61869305                            | NM_009554:302     | Zfp37         | INSIDE                 | 0.235                                                        | 1.663                          | 3280.03            | 5454.28            | 0.390                          | 2359.03            | 920.14             |
| A_68_P32601448 | chrX:109008982-109009026                          |                   |               | Unknown                | 0.235                                                        | 1.575                          | 1741.53            | 2743.17            | 0.070                          | 745.40             | 276.00             |
| A_68_P26065837 | chr8:94984139-94984189                            |                   |               | Unknown                | 0.235                                                        | 0.506                          | 1155.92            | 585.01             | 0.119                          | 988.15             | 117.29             |
| A_68_P28182973 | chr11:120050796-120050840                         | NR_030682:352     | 2810410L24Rik | INSIDE                 | 0.234                                                        | 0.512                          | 1211.69            | 620.02             | 0.120                          | 1017.97            | 121.81             |
| A_68_P28612795 | chr12:88232987-88233039                           | NM_145836:-7248   | 6430527G18Rik | PROMOTER               | 0.234                                                        | 0.631                          | 1574.07            | 993.66             | 0.148                          | 1198.97            | 177.21             |
| A_68_P22353007 | chr3:96962730-96962774                            | NM_019800:53      | Acp6          | INSIDE                 | 0.234                                                        | 0.698                          | 1586.71            | 1107.81            | 0.164                          | 1317.97            | 215.73             |
| A_68_P22408053 | chr3:107498878-107498922                          | NM_145542:566     | Ahey11        | INSIDE                 | 0.234                                                        | 0.588                          | 2456.61            | 1443.28            | 0.138                          | 1764.56            | 243.08             |
| A_68_P28743035 | chr12:112509516-112509560                         | NM_033603:217     | Amn           | INSIDE                 | 0.234                                                        | 2.192                          | 2467.95            | 5408.97            | 0.512                          | 1719.17            | 880.66             |
| A_68_P22860480 | chr4:41045173-41045217                            | NM_016689:22      | Aqp3          | INSIDE                 | 0.234                                                        | 0.480                          | 1320.46            | 633.38             | 0.112                          | 1077.59            | 120.80             |
| A_68_P27083518 | chr10:40068868-40068914                           | NM_001168304:-223 | Cdk19         | PROMOTER               | 0.234                                                        | 0.416                          | 1580.29            | 658.15             | 0.097                          | 1201.49            | 116.90             |
| A_68_P27543290 | chr10:128242192-128242236                         | NM_028873:-517    | Dnajc14       | DIVERGENT_PROMOTER     | 0.234                                                        | 0.612                          | 1036.99            | 634.30             | 0.143                          | 890.24             | 127.51             |
| A_68_P31106871 | chr17:26005229-26005273                           | NM_026633:433     | Fam195a       | INSIDE                 | 0.234                                                        | 0.400                          | 2342.18            | 936.32             | 0.094                          | 1823.49            | 170.70             |
| A_68_P21345230 | chr2:75498077-75498131                            | NR_033513:758     | Gm6793        | INSIDE                 | 0.234                                                        | 0.519                          | 1346.23            | 698.49             | 0.121                          | 1003.81            | 121.69             |

| ProbeName      | Target position of probe on CpG island microarray | TargetID                 | GeneSymbol    | CpG island Description | Ratio of relative methylation (TiO <sub>2</sub> -NP/Vehicle) | Sham group                     |                    |                    | TiO <sub>2</sub> -H group      |                    |                    |
|----------------|---------------------------------------------------|--------------------------|---------------|------------------------|--------------------------------------------------------------|--------------------------------|--------------------|--------------------|--------------------------------|--------------------|--------------------|
|                |                                                   |                          |               |                        |                                                              | Relative methylation (Cy5/Cy3) | Cy3 signal (Input) | Cy5 signal (MeDIP) | Relative methylation (Cy5/Cy3) | Cy3 signal (Input) | Cy5 signal (MeDIP) |
| A_68_P23417743 | chr4:151660802-151660846                          | NM_008237:4947           | Hes3          | INSIDE                 | 0.234                                                        | 0.655                          | 1545.32            | 1011.76            | 0.153                          | 1151.32            | 176.17             |
| A_68_P28042990 | chr11:96064768-96064813                           | NM_008267:9116           | Hoxb13        | DOWNSTREAM             | 0.234                                                        | 0.726                          | 4266.44            | 3097.35            | 0.170                          | 3090.64            | 523.99             |
| A_68_P21339411 | chr2:74601129-74601173                            | NM_010467:114            | Hoxd1         | INSIDE                 | 0.234                                                        | 0.471                          | 3599.67            | 1695.18            | 0.110                          | 2829.54            | 311.74             |
| A_68_P28670942 | chr12:99812802-99812846                           | NM_029911:3326           | Kenk10        | INSIDE                 | 0.234                                                        | 0.699                          | 4832.58            | 3376.41            | 0.163                          | 3451.33            | 563.71             |
| A_68_P24137625 | chr5:140267376-140267420                          | NM_010757:-91            | Mafk          | PROMOTER               | 0.234                                                        | 0.548                          | 8056.66            | 4414.12            | 0.128                          | 5679.47            | 727.79             |
| A_68_P28089839 | chr11:104092302-104092349                         | NM_001038609:-424        | Mapt          | PROMOTER               | 0.234                                                        | 0.649                          | 848.16             | 550.81             | 0.152                          | 767.68             | 116.83             |
| A_68_P28089849 | chr11:104093607-104093651                         | NM_001038609:879         | Mapt          | INSIDE                 | 0.234                                                        | 0.384                          | 1552.58            | 596.49             | 0.090                          | 1337.82            | 120.28             |
| A_68_P27935699 | chr11:76891803-76891847                           | NR_030756:-150           | Mir423        | PROMOTER               | 0.234                                                        | 0.649                          | 2118.19            | 1374.49            | 0.152                          | 1754.69            | 266.12             |
| A_68_P27998475 | chr11:88018009-88018053                           | NM_024174:111            | Mrops23       | INSIDE                 | 0.234                                                        | 0.715                          | 2166.43            | 1548.72            | 0.167                          | 1692.33            | 282.84             |
| A_68_P25092692 | chr7:52623070-52623114                            | NR_027802:490            | Mtag2         | INSIDE                 | 0.234                                                        | 0.589                          | 1156.52            | 681.03             | 0.138                          | 914.46             | 126.01             |
| A_68_P22157975 | chr3:55986717-55986761                            | NM_030595:885            | Nbea          | INSIDE                 | 0.234                                                        | 0.481                          | 1636.72            | 786.77             | 0.112                          | 1228.86            | 138.21             |
| A_68_P26021885 | chr8:87308549-87308593                            | NM_001081982:15669       | Nfix          | INSIDE                 | 0.234                                                        | 0.667                          | 3124.48            | 2083.98            | 0.156                          | 2177.25            | 340.14             |
| A_68_P21240002 | chr2:56966945-56966989                            | NM_013613:483            | Nr4a2         | INSIDE                 | 0.234                                                        | 0.598                          | 3165.16            | 1891.41            | 0.140                          | 2717.55            | 380.54             |
| A_68_P25587561 | chr7:148414503-148414549                          | NM_001081118:-160        | Phrf1         | DIVERGENT_PROMOTER     | 0.234                                                        | 0.675                          | 1003.84            | 677.39             | 0.158                          | 746.82             | 117.88             |
| A_68_P22825899 | chr4:33334854-33334898                            | NM_001033225:886         | Pnrc1         | INSIDE                 | 0.234                                                        | 0.334                          | 2113.96            | 707.02             | 0.078                          | 1737.46            | 136.20             |
| A_68_P27311090 | chr10:85379118-85379174                           | NM_181650:544            | Prdm4         | INSIDE                 | 0.234                                                        | 0.624                          | 1012.52            | 631.82             | 0.146                          | 816.68             | 119.27             |
| A_68_P20085267 | chr1:22813048-22813092                            | NM_001012623:-507        | Rims1         | PROMOTER               | 0.234                                                        | 0.714                          | 2083.88            | 1488.27            | 0.167                          | 1498.07            | 250.84             |
| A_68_P25090673 | chr7:52271610-52271654                            | NM_001008422:-13         | Scaf1         | DIVERGENT_PROMOTER     | 0.234                                                        | 0.503                          | 1312.83            | 660.29             | 0.118                          | 1005.47            | 118.24             |
| A_68_P24078667 | chr5:128097745-128097789                          | NM_133895:-4             | Slc15a4       | PROMOTER               | 0.234                                                        | 0.396                          | 1600.03            | 634.00             | 0.093                          | 1259.71            | 117.05             |
| A_68_P28154497 | chr11:115489343-115489387                         | NM_026071:89             | Slc25a19      | INSIDE                 | 0.234                                                        | 0.519                          | 2614.44            | 1356.14            | 0.122                          | 1961.26            | 238.46             |
| A_68_P30296519 | chr15:67008963-67009007                           | NM_009177:-540           | St3gal1       | PROMOTER               | 0.234                                                        | 1.397                          | 6262.09            | 8746.16            | 0.327                          | 3972.83            | 1297.23            |
| A_68_P21612443 | chr2:127096615-127096659                          | NM_139308:672            | Stard7        | INSIDE                 | 0.234                                                        | 0.575                          | 2492.29            | 1433.71            | 0.135                          | 2089.87            | 281.79             |
| A_68_P29855885 | chr14:102007169-102007213                         | NM_001081278:1218        | Tbc1d4        | INSIDE                 | 0.234                                                        | 0.626                          | 2309.75            | 1445.57            | 0.146                          | 1716.71            | 251.11             |
| A_68_P26696146 | chr9:85737161-85737205                            | NM_001164792:724         | Tpbp          | INSIDE                 | 0.234                                                        | 0.718                          | 8510.89            | 6108.73            | 0.168                          | 5688.51            | 954.17             |
| A_68_P23311786 | chr4:131885241-131885285                          | NM_027925:191            | Trmau1ap      | INSIDE                 | 0.234                                                        | 0.647                          | 1547.09            | 1000.95            | 0.151                          | 1252.65            | 189.76             |
| A_68_P21117412 | chr2:32631071-32631115                            | NM_177384:-189           | Ttc16         | DIVERGENT_PROMOTER     | 0.234                                                        | 0.368                          | 1711.38            | 628.97             | 0.086                          | 1341.61            | 115.48             |
| A_68_P32791135 | chrX:159266933-159266977                          | NM_178935:377            | Txlng         | INSIDE                 | 0.234                                                        | 2.256                          | 4704.49            | 10614.11           | 0.527                          | 2013.52            | 1061.48            |
| A_68_P29531325 | chr14:35487686-35487738                           | NM_001004436:599         | Wapal         | INSIDE                 | 0.234                                                        | 0.416                          | 1647.16            | 684.76             | 0.097                          | 1024.23            | 120.52             |
| A_68_P31879121 | chr18:83079861-83079905                           | NM_183033:-388           | Zfp516        | PROMOTER               | 0.234                                                        | 0.632                          | 975.37             | 616.53             | 0.148                          | 821.38             | 121.34             |
| A_68_P28746257 | chr12:113052309-113052356                         | NM_026752:-48            | Zfyve21       | DIVERGENT_PROMOTER     | 0.234                                                        | 0.514                          | 3051.94            | 1568.17            | 0.120                          | 2361.82            | 284.15             |
| A_68_P20877757 | chr1:182708574-182708623                          | AK013590:626             |               | INSIDE                 | 0.234                                                        | 0.677                          | 1003.11            | 678.65             | 0.158                          | 763.77             | 120.90             |
| A_68_P23588842 | chr5:33775723-33775772                            | ENSMUST00000030994:-1903 |               | PROMOTER               | 0.234                                                        | 0.478                          | 1263.06            | 604.05             | 0.112                          | 1034.77            | 115.76             |
| A_68_P21101976 | chr2:30093104-30093148                            | NR_028299:25             | 1700084E18Rik | INSIDE                 | 0.233                                                        | 0.511                          | 1287.13            | 657.70             | 0.119                          | 1021.28            | 121.43             |
| A_68_P25933301 | chr8:69010356-69010400                            | NM_025465:28             | 1810029B16Rik | INSIDE                 | 0.233                                                        | 0.708                          | 3416.36            | 2418.37            | 0.165                          | 2503.84            | 413.15             |
| A_68_P25097406 | chr7:53435172-53435216                            | NM_011510:209            | Abcc8         | INSIDE                 | 0.233                                                        | 1.709                          | 815.63             | 1393.61            | 0.397                          | 472.43             | 187.76             |
| A_68_P28081370 | chr11:102636075-102636119                         | NM_001110778:13344       | Adam11        | INSIDE                 | 0.233                                                        | 0.526                          | 1296.45            | 681.48             | 0.122                          | 980.89             | 120.04             |
| A_68_P21635701 | chr2:131387590-131387634                          | NM_013460:409            | Adra1d        | INSIDE                 | 0.233                                                        | 0.736                          | 10680.82           | 7860.54            | 0.172                          | 7030.56            | 1207.73            |
| A_68_P27896074 | chr11:69419192-69419236                           | NM_013415:248            | Atp1b2        | INSIDE                 | 0.233                                                        | 0.617                          | 1655.94            | 1021.30            | 0.144                          | 1303.26            | 187.19             |
| A_68_P22592103 | chr3:142364167-142364211                          | NM_173763:145            | Ceb12         | INSIDE                 | 0.233                                                        | 0.573                          | 2890.94            | 1655.59            | 0.133                          | 2268.19            | 302.15             |
| A_68_P21822531 | chr2:165058849-165058897                          | NM_174988:1365           | Cdh22         | INSIDE                 | 0.233                                                        | 0.655                          | 964.16             | 631.37             | 0.152                          | 775.00             | 118.13             |
| A_68_P31259845 | chr17:57201740-57201784                           | NM_177638:63             | Crb3          | INSIDE                 | 0.233                                                        | 0.557                          | 1288.48            | 718.25             | 0.130                          | 950.80             | 123.39             |
| A_68_P23448648 | chr5:4104578-4104622                              | NM_020010:97             | Cyp51         | INSIDE                 | 0.233                                                        | 0.382                          | 1575.88            | 602.63             | 0.089                          | 1302.24            | 115.83             |
| A_68_P23262654 | chr4:123088662-123088706                          | NM_001167918:470         | D830031N03Rik | INSIDE                 | 0.233                                                        | 0.439                          | 1564.50            | 686.89             | 0.102                          | 1135.67            | 116.27             |
| A_68_P27259217 | chr10:75355978-75356022                           | NM_024440:-142           | Der13         | PROMOTER               | 0.233                                                        | 1.510                          | 6147.63            | 9284.02            | 0.353                          | 4088.95            | 1441.76            |
| A_68_P31065304 | chr17:15517920-15517964                           | NM_007865:-5155          | Dll1          | PROMOTER               | 0.233                                                        | 0.429                          | 2393.26            | 1026.31            | 0.100                          | 1839.54            | 183.79             |
| A_68_P29699002 | chr14:70475220-70475264                           | NM_018781:-2009          | Egr3          | PROMOTER               | 0.233                                                        | 0.626                          | 1024.73            | 641.53             | 0.146                          | 798.27             | 116.46             |
| A_68_P31418980 | chr7:87152677-87152727                            | NM_010137:-501           | Epas1         | PROMOTER               | 0.233                                                        | 0.437                          | 1621.88            | 708.25             | 0.102                          | 1324.91            | 134.92             |
| A_68_P25025744 | chr7:29956908-29956952                            | NM_182696:1522           | Ggn           | INSIDE                 | 0.233                                                        | 0.510                          | 1654.80            | 844.00             | 0.119                          | 1331.23            | 158.23             |
| A_68_P26220482 | chr8:123011851-123011906                          | NM_198671:-887           | Gsc1          | PROMOTER               | 0.233                                                        | 0.659                          | 1206.07            | 794.68             | 0.154                          | 959.89             | 147.68             |
| A_68_P23977818 | chr5:110536465-110536509                          | NM_145147:730            | Gtbbp6        | INSIDE                 | 0.233                                                        | 1.433                          | 6337.49            | 9079.31            | 0.334                          | 4296.42            | 1435.34            |
| A_68_P24038703 | chr5:120885821-120885873                          | NM_008499:3952           | Lhx5          | INSIDE                 | 0.233                                                        | 0.532                          | 1193.21            | 635.22             | 0.124                          | 972.07             | 120.79             |

| ProbeName      | Target position of probe on CpG island microarray | TargetID                 | GeneSymbol | CpG island Description | Ratio of relative methylation (TiO <sub>2</sub> -NP/Vehicle) | Sham group                     |                    |                    | TiO <sub>2</sub> -H group      |                    |                    |
|----------------|---------------------------------------------------|--------------------------|------------|------------------------|--------------------------------------------------------------|--------------------------------|--------------------|--------------------|--------------------------------|--------------------|--------------------|
|                |                                                   |                          |            |                        |                                                              | Relative methylation (Cy5/Cy3) | Cy3 signal (Input) | Cy5 signal (MeDIP) | Relative methylation (Cy5/Cy3) | Cy3 signal (Input) | Cy5 signal (MeDIP) |
| A_68_P28077443 | chr11:101949878-101949922                         | NM_016695:-71            | Mpp2       | PROMOTER               | 0.233                                                        | 0.589                          | 3476.25            | 2048.62            | 0.138                          | 2582.86            | 355.15             |
| A_68_P30126800 | chr15:34012857-34012901                           | NM_026002:405            | Mtdh       | INSIDE                 | 0.233                                                        | 0.566                          | 1116.12            | 632.15             | 0.132                          | 971.16             | 128.37             |
| A_68_P27555611 | chr11:3996953-3997010                             | NM_026443:-1547          | Mtflp1     | PROMOTER               | 0.233                                                        | 0.678                          | 934.18             | 633.01             | 0.158                          | 748.48             | 118.13             |
| A_68_P23392000 | chr4:147413032-147413076                          | NM_010840:-131           | Mthfr      | DIVERGENT_PROMOTER     | 0.233                                                        | 0.683                          | 2292.33            | 1565.34            | 0.159                          | 1870.54            | 297.44             |
| A_68_P28958208 | chr13:38129074-38129118                           | NM_024242:239            | Riok1      | INSIDE                 | 0.233                                                        | 0.718                          | 3482.16            | 2499.46            | 0.168                          | 2431.95            | 407.54             |
| A_68_P30465139 | chr15:96539817-96539861                           | NM_175121:-9709          | Slc38a2    | PROMOTER               | 0.233                                                        | 0.578                          | 1594.16            | 920.82             | 0.135                          | 1284.27            | 173.18             |
| A_68_P24114434 | chr5:135517995-135518039                          | NM_016801:18575          | Stx1a      | INSIDE                 | 0.233                                                        | 2.067                          | 2582.59            | 5339.45            | 0.482                          | 1589.18            | 766.62             |
| A_68_P24333613 | chr6:30643690-30643734                            | NM_031998:-30            | Tsga14     | PROMOTER               | 0.233                                                        | 0.486                          | 1368.04            | 664.28             | 0.113                          | 1098.58            | 124.28             |
| A_68_P21848231 | chr2:169459132-169459176                          | NM_080455:-9             | Tshz2      | INSIDE                 | 0.233                                                        | 0.442                          | 1443.67            | 638.70             | 0.103                          | 1160.36            | 119.75             |
| A_68_P20002775 | chr1:3662278-3662322                              | NM_001011874:-721        | Xkr4       | PROMOTER               | 0.233                                                        | 0.536                          | 1206.69            | 647.03             | 0.125                          | 940.71             | 117.56             |
| A_68_P26342787 | chr9:20326238-20326285                            | NM_001082485:-398        | Zfp266     | PROMOTER               | 0.233                                                        | 0.635                          | 1069.12            | 678.69             | 0.148                          | 807.82             | 119.60             |
| A_68_P24951572 | chr7:4966899-4966945                              | NM_025324:-187           | Zfp524     | DIVERGENT_PROMOTER     | 0.233                                                        | 0.450                          | 1318.63            | 593.58             | 0.105                          | 1108.13            | 116.21             |
| A_68_P24954796 | chr7:6237873-6237917                              | NM_001024928:-287        | Zfp667     | PROMOTER               | 0.233                                                        | 0.626                          | 982.30             | 614.46             | 0.146                          | 794.62             | 115.95             |
| A_68_P22360090 | chr3:98231396-98231440                            | NM_172863:45015          | Zfp697     | INSIDE                 | 0.233                                                        | 0.571                          | 1128.96            | 644.47             | 0.133                          | 894.34             | 118.88             |
| A_68_P25358042 | chr7:105963755-105963799                          |                          | Unknown    |                        | 0.233                                                        | 0.599                          | 5371.82            | 3215.15            | 0.139                          | 3624.26            | 504.82             |
| A_68_P22283285 | chr3:82931474-82931533                            | ENSMUST00000047876:1665  |            | INSIDE                 | 0.233                                                        | 0.645                          | 1220.09            | 787.32             | 0.150                          | 817.90             | 122.85             |
| A_68_P21810971 | chr2:163029162-163029206                          | ENSMUST00000128999:-1104 |            | PROMOTER               | 0.233                                                        | 0.671                          | 1963.89            | 1317.26            | 0.157                          | 1476.06            | 231.09             |
| A_68_P30371088 | chr15:80086012-80086056                           | NM_009716:421            | Atf4       | INSIDE                 | 0.232                                                        | 0.672                          | 1019.51            | 685.55             | 0.156                          | 773.57             | 120.87             |
| A_68_P30588540 | chr16:20622060-20622119                           | NM_028420:-738           | Camk2n2    | DIVERGENT_PROMOTER     | 0.232                                                        | 0.667                          | 992.97             | 662.42             | 0.155                          | 753.11             | 116.79             |
| A_68_P31140916 | chr17:31774060-31774104                           | NM_178224:-6             | Cbs        | PROMOTER               | 0.232                                                        | 0.365                          | 1673.06            | 610.58             | 0.085                          | 1378.49            | 116.65             |
| A_68_P27280212 | chr10:79451564-79451608                           | NM_007725:242            | Cnn2       | INSIDE                 | 0.232                                                        | 0.650                          | 3682.96            | 2393.12            | 0.151                          | 2593.38            | 391.22             |
| A_68_P27793111 | chr11:51103960-51104004                           | NM_153393:561            | Col23a1    | INSIDE                 | 0.232                                                        | 0.666                          | 2226.32            | 1483.60            | 0.154                          | 1682.83            | 259.68             |
| A_68_P22609986 | chr3:145316237-145316281                          | NM_010516:-3309          | Cyr61      | PROMOTER               | 0.232                                                        | 2.130                          | 5851.95            | 12467.31           | 0.494                          | 3845.62            | 1900.72            |
| A_68_P30244838 | chr15:57723989-57724033                           | NM_024207:-37            | Derl1      | PROMOTER               | 0.232                                                        | 0.450                          | 1669.72            | 750.80             | 0.104                          | 1165.30            | 121.68             |
| A_68_P26136484 | chr8:108404850-108404894                          | NM_181594:22             | Ede4       | INSIDE                 | 0.232                                                        | 1.482                          | 3712.53            | 5500.23            | 0.344                          | 2542.61            | 874.56             |
| A_68_P26657026 | chr9:77765571-77765615                            | NM_134255:421            | Elovl5     | INSIDE                 | 0.232                                                        | 0.545                          | 2279.31            | 1242.80            | 0.127                          | 1766.07            | 223.49             |
| A_68_P28609997 | chr12:87763078-87763133                           | NM_011934:512            | Esrrb      | INSIDE                 | 0.232                                                        | 0.539                          | 1254.47            | 675.77             | 0.125                          | 972.41             | 121.42             |
| A_68_P22649280 | chr3:151873415-151873459                          | NM_057172:15             | Fubp1      | INSIDE                 | 0.232                                                        | 0.596                          | 2909.92            | 1734.84            | 0.138                          | 1925.74            | 266.55             |
| A_68_P24126250 | chr5:137972865-137972909                          | NM_010312:1571           | Gnb2       | INSIDE                 | 0.232                                                        | 0.470                          | 1789.81            | 841.55             | 0.109                          | 1339.94            | 146.17             |
| A_68_P23270089 | chr4:124428703-124428747                          | NM_008385-9603           | Inpp5b     | INSIDE                 | 0.232                                                        | 0.511                          | 2225.93            | 1136.63            | 0.118                          | 1843.02            | 218.23             |
| A_68_P32028428 | chr19:25311817-25311861                           | NM_181404:147            | Kank1      | INSIDE                 | 0.232                                                        | 0.545                          | 1629.53            | 887.99             | 0.126                          | 1274.83            | 161.15             |
| A_68_P22281944 | chr3:82708169-82708225                            | NM_023624:-300           | Lrat       | PROMOTER               | 0.232                                                        | 0.448                          | 1438.07            | 644.30             | 0.104                          | 1180.35            | 122.71             |
| A_68_P31253992 | chr17:56260257-56260301                           | NM_029796:1091           | Lrg1       | INSIDE                 | 0.232                                                        | 0.475                          | 1515.77            | 720.31             | 0.110                          | 1143.42            | 125.89             |
| A_68_P30480289 | chr15:99288589-99288642                           | NM_001001884:-436        | Nckap5l    | PROMOTER               | 0.232                                                        | 0.587                          | 1160.68            | 681.02             | 0.136                          | 876.01             | 119.15             |
| A_68_P29031122 | chr13:51266973-51267017                           | NM_029173:601            | Nxn12      | INSIDE                 | 0.232                                                        | 0.644                          | 2163.55            | 1392.28            | 0.149                          | 1691.08            | 252.45             |
| A_68_P21818228 | chr2:164323274-164323322                          | NM_133779:274            | Pigt       | INSIDE                 | 0.232                                                        | 0.474                          | 1533.57            | 726.45             | 0.110                          | 1144.52            | 125.71             |
| A_68_P27982135 | chr11:85124644-85124688                           | NM_016910:-89            | Ppm1d      | PROMOTER               | 0.232                                                        | 0.470                          | 1328.03            | 624.62             | 0.109                          | 1120.50            | 122.48             |
| A_68_P32479506 | chrX:75041133-75041177                            | NM_016979:145            | Prkx       | INSIDE                 | 0.232                                                        | 1.361                          | 2009.54            | 2735.05            | 0.316                          | 788.05             | 249.02             |
| A_68_P25508223 | chr7:135079560-135079608                          | NM_001081374:10655       | Prss36     | INSIDE                 | 0.232                                                        | 0.516                          | 1289.27            | 665.11             | 0.120                          | 976.47             | 116.85             |
| A_68_P21044977 | chr2:19367764-19367808                            | NM_018809:497            | Ptfla      | INSIDE                 | 0.232                                                        | 0.402                          | 3542.83            | 1422.71            | 0.093                          | 2799.56            | 261.23             |
| A_68_P29405444 | chr14:12386788-12386841                           | NM_008981:748            | Ptprg      | INSIDE                 | 0.232                                                        | 0.674                          | 1055.50            | 711.71             | 0.157                          | 757.52             | 118.69             |
| A_68_P22615131 | chr3:146184129-146184173                          | NM_027371:237            | Rpl1       | INSIDE                 | 0.232                                                        | 0.683                          | 1735.20            | 1185.85            | 0.159                          | 1443.96            | 229.10             |
| A_68_P28429502 | chr12:52478398-52478449                           | NM_029825:-143           | Sefl1      | PROMOTER               | 0.232                                                        | 0.411                          | 1649.56            | 678.52             | 0.095                          | 1260.64            | 120.27             |
| A_68_P27091228 | chr10:41530095-41530139                           | NM_001162908:-263        | Sesn1      | DIVERGENT_PROMOTER     | 0.232                                                        | 0.568                          | 2939.31            | 1670.16            | 0.132                          | 2179.70            | 287.93             |
| A_68_P27176493 | chr10:60215697-60215744                           | NM_023596:-190           | Slc29a3    | PROMOTER               | 0.232                                                        | 0.573                          | 1256.27            | 719.52             | 0.133                          | 891.49             | 118.71             |
| A_68_P20254931 | chr1:57831531-57831575                            | NM_144882:-152           | Spats2l    | PROMOTER               | 0.232                                                        | 0.580                          | 2911.19            | 1689.19            | 0.135                          | 2333.82            | 314.72             |
| A_68_P23607899 | chr5:36826309-36826353                            | NM_001170454:604         | Tada2b     | INSIDE                 | 0.232                                                        | 0.687                          | 2737.89            | 1879.93            | 0.159                          | 1874.62            | 298.03             |
| A_68_P31006135 | chr17:3557579-3557623                             | NM_146074:113            | Tfblm      | INSIDE                 | 0.232                                                        | 0.563                          | 1307.09            | 735.85             | 0.131                          | 902.22             | 117.79             |
| A_68_P29506485 | chr14:31362134-31362189                           | NM_009388:-173           | Tkt        | PROMOTER               | 0.232                                                        | 0.524                          | 1355.15            | 709.45             | 0.122                          | 979.44             | 119.11             |
| A_68_P26469618 | chr9:44607091-44607135                            | NM_027865:187            | Tmem25     | INSIDE                 | 0.232                                                        | 0.566                          | 6036.59            | 3415.64            | 0.131                          | 4438.21            | 582.03             |
| A_68_P28520552 | chr12:71554055-71554099                           | NM_028339:-64            | Tmx1       | PROMOTER               | 0.232                                                        | 0.645                          | 936.06             | 603.94             | 0.150                          | 787.49             | 117.81             |



| ProbeName      | Target position of probe on CpG island microarray | TargetID                 | GeneSymbol    | CpG island Description | Ratio of relative methylation (TiO <sub>2</sub> -NP/Vehicle) | Sham group                     |                    |                    | TiO <sub>2</sub> -H group      |                    |                    |
|----------------|---------------------------------------------------|--------------------------|---------------|------------------------|--------------------------------------------------------------|--------------------------------|--------------------|--------------------|--------------------------------|--------------------|--------------------|
|                |                                                   |                          |               |                        |                                                              | Relative methylation (Cy5/Cy3) | Cy3 signal (Input) | Cy5 signal (MeDIP) | Relative methylation (Cy5/Cy3) | Cy3 signal (Input) | Cy5 signal (MeDIP) |
| A_68_P22168178 | chr3:58221125-58221170                            | NM_001081229:1537        | Tsc22d2       | INSIDE                 | 0.232                                                        | 0.391                          | 1634.68            | 639.56             | 0.091                          | 1344.83            | 121.81             |
| A_68_P32749010 | chrX:148776690-148776734                          | NM_029836:315            | Tspyl2        | INSIDE                 | 0.232                                                        | 1.354                          | 4174.90            | 5653.56            | 0.315                          | 1736.77            | 546.61             |
| A_68_P27332828 | chr10:89208416-89208468                           | NM_029166:707            | Uhrf1bp11     | INSIDE                 | 0.232                                                        | 0.575                          | 1160.00            | 667.26             | 0.133                          | 881.77             | 117.45             |
| A_68_P23183545 | chr4:105988267-105988311                          | NM_183225:-529           | Usp24         | PROMOTER               | 0.232                                                        | 1.519                          | 1236.60            | 1878.81            | 0.353                          | 961.88             | 339.71             |
| A_68_P23872778 | chr5:88983098-88983142                            | NM_023054:-387           | Utp3          | PROMOTER               | 0.232                                                        | 0.583                          | 1209.59            | 705.76             | 0.135                          | 960.89             | 130.11             |
| A_68_P29478593 | chr14:26426711-26426755                           | NM_183208:148062         | Zmiz1         | INSIDE                 | 0.232                                                        | 0.562                          | 1087.34            | 611.02             | 0.131                          | 894.35             | 116.79             |
| A_68_P29059927 | chr13:56323524-56323570                           | ENSMUST00000127754:21755 |               | DOWNSTREAM             | 0.232                                                        | 0.573                          | 1211.01            | 693.96             | 0.133                          | 912.40             | 121.44             |
| A_68_P30633252 | chr16:28929399-28929443                           | NM_177718:364            | 1600021P15Rik | INSIDE                 | 0.231                                                        | 1.334                          | 3525.37            | 4702.95            | 0.309                          | 2392.68            | 738.53             |
| A_68_P22552058 | chr3:135101385-135101433                          | NR_030689:221            | 4930539J05Rik | INSIDE                 | 0.231                                                        | 0.462                          | 1382.80            | 638.29             | 0.107                          | 1089.09            | 116.36             |
| A_68_P25645837 | chr8:9978074-9978118                              | NM_001081119:380         | Abhd13        | INSIDE                 | 0.231                                                        | 0.627                          | 931.50             | 584.18             | 0.145                          | 819.22             | 118.56             |
| A_68_P22862464 | chr4:41445752-41445802                            | NM_001085515:4333        | Al464131      | INSIDE                 | 0.231                                                        | 0.610                          | 1138.17            | 694.28             | 0.141                          | 833.82             | 117.44             |
| A_68_P31625260 | chr18:36839170-36839214                           | NM_146085:-172           | Apbb3         | PROMOTER               | 0.231                                                        | 1.575                          | 1739.12            | 2739.35            | 0.364                          | 1216.07            | 442.92             |
| A_68_P24330605 | chr6:30126242-30126286                            | NR_038124:-358           | BB283400      | DIVERGENT_PROMOTER     | 0.231                                                        | 0.510                          | 2454.40            | 1251.63            | 0.118                          | 1994.97            | 234.89             |
| A_68_P27927584 | chr11:75493253-75493297                           | NM_133656:463            | Crk           | INSIDE                 | 0.231                                                        | 0.688                          | 2841.10            | 1953.86            | 0.159                          | 2229.42            | 354.73             |
| A_68_P25501142 | chr7:133709848-133709892                          | NM_146200:10             | Eif3e         | INSIDE                 | 0.231                                                        | 0.669                          | 1853.08            | 1239.80            | 0.155                          | 1422.48            | 219.90             |
| A_68_P26779719 | chr9:10225984-102256028                           | NM_001168296:1017        | Ephb1         | INSIDE                 | 0.231                                                        | 0.492                          | 1373.43            | 676.13             | 0.114                          | 1048.05            | 119.08             |
| A_68_P29518106 | chr14:33327086-33327130                           | NM_001081221:402         | Ercc6         | INSIDE                 | 0.231                                                        | 0.598                          | 2380.00            | 1422.77            | 0.138                          | 1768.56            | 244.24             |
| A_68_P25724987 | chr8:26149339-26149383                            | NM_001081187:74          | Htra4         | INSIDE                 | 0.231                                                        | 0.672                          | 1954.50            | 1313.09            | 0.155                          | 1484.86            | 230.09             |
| A_68_P30366869 | chr15:79335593-79335637                           | NM_008427:57             | Kenj4         | INSIDE                 | 0.231                                                        | 0.476                          | 1403.09            | 668.18             | 0.110                          | 1117.27            | 122.75             |
| A_68_P23657076 | chr5:45911955-45911999                            | NM_025895:509            | Med28         | INSIDE                 | 0.231                                                        | 0.478                          | 1401.70            | 669.62             | 0.110                          | 1080.19            | 119.27             |
| A_68_P21038121 | chr2:17986435-17986479                            | NM_010804:9559           | Mllt10        | INSIDE                 | 0.231                                                        | 0.529                          | 2055.16            | 1088.18            | 0.122                          | 1603.82            | 196.13             |
| A_68_P28077432 | chr11:101948559-101948603                         | NM_016695:1249           | Mpp2          | INSIDE                 | 0.231                                                        | 0.591                          | 1080.73            | 639.08             | 0.137                          | 843.37             | 115.31             |
| A_68_P23657846 | chr5:46060767-46060811                            | NM_019438:-375           | Ncapg         | PROMOTER               | 0.231                                                        | 0.607                          | 2072.32            | 1257.71            | 0.140                          | 1388.98            | 194.68             |
| A_68_P28047030 | chr11:96690616-96690669                           | NM_001130451:-5201       | Nfe2l1        | PROMOTER               | 0.231                                                        | 0.568                          | 1541.58            | 875.05             | 0.131                          | 1166.96            | 152.97             |
| A_68_P20642548 | chr1:137815415-137815459                          | NM_019645:165            | Pkp1          | INSIDE                 | 0.231                                                        | 0.496                          | 1469.62            | 729.61             | 0.115                          | 1129.56            | 129.38             |
| A_68_P29322934 | chr13:111185727-111185771                         | NM_152804:497            | Plk2          | INSIDE                 | 0.231                                                        | 0.658                          | 2584.00            | 1700.99            | 0.152                          | 1944.48            | 295.33             |
| A_68_P23545731 | chr5:24605464-24605510                            | NM_145401:974            | Prkag2        | INSIDE                 | 0.231                                                        | 1.809                          | 2890.53            | 5229.58            | 0.418                          | 1905.40            | 795.52             |
| A_68_P27543378 | chr10:128259182-128259239                         | NM_025364:384            | Sarpn         | INSIDE                 | 0.231                                                        | 0.497                          | 1334.36            | 662.70             | 0.115                          | 1044.10            | 120.03             |
| A_68_P21117852 | chr2:32701638-32701686                            | NM_009295:1090           | Stxbp1        | INSIDE                 | 0.231                                                        | 0.465                          | 1469.55            | 683.45             | 0.108                          | 1104.27            | 118.87             |
| A_68_P26958516 | chr10:14425277-14425321                           | NM_025418:-3             | Vta1          | PROMOTER               | 0.231                                                        | 0.633                          | 1890.19            | 1195.71            | 0.146                          | 1397.50            | 204.00             |
| A_68_P23296886 | chr4:129168678-129168722                          | NM_001085491:267         | 1700125D06Rik | INSIDE                 | 0.230                                                        | 0.414                          | 1808.23            | 748.83             | 0.095                          | 1441.27            | 137.45             |
| A_68_P20878147 | chr1:182781059-182781103                          | NM_145943:-201           | BC031781      | PROMOTER               | 0.230                                                        | 0.459                          | 2994.02            | 1372.79            | 0.105                          | 2437.79            | 256.85             |
| A_68_P21615856 | chr2:127657274-127657318                          | NM_001113179:299         | Bub1          | INSIDE                 | 0.230                                                        | 0.398                          | 1552.78            | 617.92             | 0.091                          | 1339.09            | 122.33             |
| A_68_P23345839 | chr4:138009933-138009977                          | NM_025451:-1108          | Camk2n1       | PROMOTER               | 0.230                                                        | 0.499                          | 1350.39            | 673.19             | 0.114                          | 1018.54            | 116.58             |
| A_68_P21325834 | chr2:72314810-72314854                            | NM_025866:557            | Cdca7         | INSIDE                 | 0.230                                                        | 0.559                          | 1315.79            | 734.89             | 0.128                          | 934.23             | 119.79             |
| A_68_P27542787 | chr10:128142015-128142063                         | NM_016756:69             | Cdk2          | INSIDE                 | 0.230                                                        | 0.446                          | 1582.07            | 705.57             | 0.102                          | 1206.47            | 123.58             |
| A_68_P25843135 | chr8:48798585-48798629                            | NM_172407:679            | Cdkn2aip      | INSIDE                 | 0.230                                                        | 0.618                          | 1365.36            | 844.39             | 0.142                          | 989.25             | 140.46             |
| A_68_P26785468 | chr9:103266904-103266948                          | NM_001134427:383         | Cdv3          | INSIDE                 | 0.230                                                        | 0.644                          | 2629.97            | 1694.11            | 0.148                          | 1895.91            | 280.58             |
| A_68_P31666410 | chr18:44540001-44540048                           | NM_027490:-129           | Dep2          | PROMOTER               | 0.230                                                        | 0.612                          | 1102.95            | 674.76             | 0.141                          | 869.71             | 122.60             |
| A_68_P21568394 | chr2:119034600-119034644                          | NM_139139:-91            | Dnajc17       | PROMOTER               | 0.230                                                        | 0.469                          | 1812.04            | 850.67             | 0.108                          | 1319.29            | 142.16             |
| A_68_P25310575 | chr7:97128573-97128627                            | NM_021876:886            | Eed           | INSIDE                 | 0.230                                                        | 0.560                          | 1210.82            | 678.16             | 0.129                          | 895.85             | 115.59             |
| A_68_P25952518 | chr8:73062911-73062958                            | NM_007924:-639           | Eil1          | PROMOTER               | 0.230                                                        | 0.477                          | 1401.11            | 667.69             | 0.109                          | 1136.48            | 124.39             |
| A_68_P20827965 | chr1:173367690-173367734                          | NM_172647:21             | F11r          | INSIDE                 | 0.230                                                        | 0.607                          | 1412.46            | 858.03             | 0.139                          | 1210.79            | 168.87             |
| A_68_P31253725 | chr17:56218817-56218862                           | NM_008233:-240           | Hdgfrp2       | DIVERGENT_PROMOTER     | 0.230                                                        | 2.071                          | 10447.06           | 21635.33           | 0.476                          | 6921.80            | 3296.94            |
| A_68_P23598367 | chr5:35448339-35448383                            | NM_013587:-14            | Lrpap1        | PROMOTER               | 0.230                                                        | 0.573                          | 1196.14            | 685.54             | 0.132                          | 920.87             | 121.64             |
| A_68_P23547781 | chr5:25003445-25003504                            | NM_001081383:1127        | Mll3          | INSIDE                 | 0.230                                                        | 0.613                          | 1029.87            | 631.36             | 0.141                          | 825.57             | 116.54             |
| A_68_P30463776 | chr15:96291913-96291959                           | NM_028148:-662           | Scafl1        | PROMOTER               | 0.230                                                        | 0.690                          | 1041.08            | 718.10             | 0.158                          | 769.02             | 121.80             |
| A_68_P20038598 | chr1:12982722-12982766                            | NM_172841:-1528          | Sleo5a1       | PROMOTER               | 0.230                                                        | 0.707                          | 2334.38            | 1649.89            | 0.162                          | 1690.97            | 274.48             |
| A_68_P23281723 | chr4:126412326-126412376                          | NM_198960:1163           | Tcfap2e       | INSIDE                 | 0.230                                                        | 0.514                          | 1321.82            | 679.86             | 0.119                          | 1017.52            | 120.60             |
| A_68_P22168171 | chr3:58220304-58220348                            | NM_001081229:716         | Tsc22d2       | INSIDE                 | 0.230                                                        | 0.512                          | 2654.64            | 1358.59            | 0.118                          | 1937.31            | 228.40             |
| A_68_P31118858 | chr17:27993704-27993749                           | NM_001080769:275         | Uhrf1bp1      | INSIDE                 | 0.230                                                        | 0.517                          | 1782.60            | 921.56             | 0.119                          | 1305.18            | 155.06             |

| ProbeName      | Target position of probe on CpG island microarray | TargetID                 | GeneSymbol    | CpG island Description | Ratio of relative methylation (TiO <sub>2</sub> -NP/Vehicle) | Sham group                     |                    |                    | TiO <sub>2</sub> -H group      |                    |                    |
|----------------|---------------------------------------------------|--------------------------|---------------|------------------------|--------------------------------------------------------------|--------------------------------|--------------------|--------------------|--------------------------------|--------------------|--------------------|
|                |                                                   |                          |               |                        |                                                              | Relative methylation (Cy5/Cy3) | Cy3 signal (Input) | Cy5 signal (MeDIP) | Relative methylation (Cy5/Cy3) | Cy3 signal (Input) | Cy5 signal (MeDIP) |
| A_68_P24136133 | chr5:140016708-140016752                          | NM_013702:-3121          | Uncx          | PROMOTER               | 0.230                                                        | 0.701                          | 1942.94            | 1362.01            | 0.161                          | 1361.68            | 219.39             |
| A_68_P23340748 | chr4:137150166-137150210                          | NM_130879:85             | Usp48         | INSIDE                 | 0.230                                                        | 0.638                          | 1200.76            | 765.53             | 0.147                          | 1080.33            | 158.73             |
| A_68_P30476474 | chr15:98622103-98622147                           | NM_021279:1837           | Wnt1          | INSIDE                 | 0.230                                                        | 0.554                          | 1776.70            | 984.99             | 0.127                          | 1383.80            | 176.20             |
| A_68_P24385314 | chr6:39822837-39822881                            |                          |               | Unknown                | 0.230                                                        | 0.703                          | 1373.49            | 965.48             | 0.161                          | 1176.89            | 190.03             |
| A_68_P23255468 | chr4:120887443-120887487                          | ENSMUST00000056635:225   |               | INSIDE                 | 0.230                                                        | 0.591                          | 3483.66            | 2059.02            | 0.136                          | 2540.34            | 344.63             |
| A_68_P26422484 | chr9:35229611-35229655                            | ENSMUST00000154652:-1540 |               | PROMOTER               | 0.230                                                        | 0.359                          | 1934.75            | 695.19             | 0.083                          | 1457.55            | 120.50             |
| A_68_P23996379 | chr5:113567220-113567264                          | NM_172884:25091          | 2900026A02Rik | INSIDE                 | 0.229                                                        | 0.720                          | 1688.07            | 1214.90            | 0.165                          | 1308.43            | 215.28             |
| A_68_P30647299 | chr16:31430033-31430077                           | NM_001122683:1216        | Bdh1          | INSIDE                 | 0.229                                                        | 0.646                          | 983.74             | 635.74             | 0.148                          | 846.49             | 125.33             |
| A_68_P30588538 | chr16:20621896-20621940                           | NM_028420:-567           | Camk2n2       | DIVERGENT_PROMOTER     | 0.229                                                        | 0.430                          | 2415.28            | 1037.65            | 0.099                          | 1723.21            | 169.85             |
| A_68_P23362366 | chr4:140695171-140695215                          | NM_001025608:519         | D4Ert222c     | INSIDE                 | 0.229                                                        | 0.487                          | 2705.91            | 1319.03            | 0.112                          | 2048.62            | 229.04             |
| A_68_P20842586 | chr1:176432169-176432213                          | NM_019445:235            | Fmn2          | INSIDE                 | 0.229                                                        | 0.618                          | 1096.30            | 677.62             | 0.141                          | 846.06             | 119.63             |
| A_68_P24126253 | chr5:137973169-137973213                          | NM_010312:1267           | Gnb2          | INSIDE                 | 0.229                                                        | 0.518                          | 3088.52            | 1599.67            | 0.118                          | 2325.88            | 275.27             |
| A_68_P24501234 | chr6:63206775-63206826                            | NM_008167:-50            | Grid2         | PROMOTER               | 0.229                                                        | 0.614                          | 1104.05            | 677.98             | 0.141                          | 870.04             | 122.35             |
| A_68_P27127190 | chr10:49503177-49503221                           | NM_001111268:5362        | Grik2         | INSIDE                 | 0.229                                                        | 0.713                          | 1333.07            | 950.48             | 0.163                          | 1153.25            | 188.08             |
| A_68_P26560493 | chr9:60561252-60561296                            | NM_026235:347            | Larp6         | INSIDE                 | 0.229                                                        | 0.463                          | 1618.21            | 749.42             | 0.106                          | 1254.34            | 133.27             |
| A_68_P24563520 | chr6:77194801-77194845                            | NM_028880:2112           | Lrrtm1        | INSIDE                 | 0.229                                                        | 0.567                          | 1769.99            | 1003.29            | 0.130                          | 1170.13            | 152.11             |
| A_68_P22133753 | chr3:51907587-51907631                            | NM_001004176:1320        | Maml3         | INSIDE                 | 0.229                                                        | 0.492                          | 2548.76            | 1253.29            | 0.112                          | 1797.82            | 202.21             |
| A_68_P31151558 | chr17:34162154-34162198                           | NR_029800:-139           | Mir219-1      | PROMOTER               | 0.229                                                        | 0.552                          | 3826.60            | 2112.13            | 0.126                          | 2635.08            | 333.09             |
| A_68_P31475749 | chr18:7002345-7002389                             | NM_177595:2411           | Mcx           | INSIDE                 | 0.229                                                        | 0.503                          | 1655.81            | 832.28             | 0.115                          | 1285.05            | 148.23             |
| A_68_P31112749 | chr17:26981132-26981187                           | NM_008700:-2649          | Nkx2-5        | PROMOTER               | 0.229                                                        | 0.613                          | 1091.76            | 668.73             | 0.140                          | 865.35             | 121.26             |
| A_68_P32319271 | chrX:34138375-34138419                            | NM_016783:177            | Pgrmc1        | INSIDE                 | 0.229                                                        | 2.513                          | 5728.76            | 14398.84           | 0.576                          | 2272.59            | 1309.61            |
| A_68_P27921014 | chr11:74336964-74337008                           | NM_001015046:66674       | Rap1gap2      | INSIDE                 | 0.229                                                        | 0.567                          | 1792.23            | 1016.13            | 0.130                          | 1253.56            | 162.62             |
| A_68_P32790792 | chrX:159198218-159198262                          | NM_009031:-63            | Rbbp7         | PROMOTER               | 0.229                                                        | 2.049                          | 3263.63            | 6685.96            | 0.469                          | 1471.76            | 690.26             |
| A_68_P22345833 | chr3:95622982-95623029                            | NM_001081293:-1259       | Rprd2         | PROMOTER               | 0.229                                                        | 0.515                          | 2375.11            | 1222.59            | 0.118                          | 1766.61            | 208.20             |
| A_68_P28224314 | chr12:8777965-8778009                             | NM_011519:-215           | Sdc1          | PROMOTER               | 0.229                                                        | 0.578                          | 2685.91            | 1552.20            | 0.132                          | 2166.00            | 286.47             |
| A_68_P20427310 | chr1:90967840-90967891                            | NM_133816:829            | Sh3bp4        | INSIDE                 | 0.229                                                        | 0.686                          | 1010.05            | 693.00             | 0.157                          | 747.24             | 117.40             |
| A_68_P20788007 | chr1:166178862-166178906                          | NM_054087:-301           | Slc19a2       | PROMOTER               | 0.229                                                        | 0.623                          | 2213.34            | 1379.14            | 0.143                          | 1587.80            | 227.00             |
| A_68_P26229668 | chr8:124430812-124430856                          | NM_011404:752            | Slc7a5        | INSIDE                 | 0.229                                                        | 0.475                          | 2550.79            | 1211.51            | 0.109                          | 1869.54            | 203.48             |
| A_68_P21626535 | chr2:129626154-129626199                          | NM_001038635:-76         | Stk35         | PROMOTER               | 0.229                                                        | 0.638                          | 1788.07            | 1140.54            | 0.146                          | 1277.63            | 186.81             |
| A_68_P26239528 | chr8:125898007-125898051                          | NM_001037877:294         | Tcf25         | INSIDE                 | 0.229                                                        | 0.415                          | 1480.75            | 613.93             | 0.095                          | 1293.94            | 122.71             |
| A_68_P24117665 | chr5:136219665-136219716                          | NM_172541:352            | Tmem120a      | INSIDE                 | 0.229                                                        | 0.419                          | 1817.89            | 762.17             | 0.096                          | 1454.78            | 139.72             |
| A_68_P25393401 | chr7:112781612-112781656                          | NM_018880:379            | Trim3         | INSIDE                 | 0.229                                                        | 2.580                          | 12493.00           | 32226.47           | 0.591                          | 7813.22            | 4616.60            |
| A_68_P32791133 | chrX:159266782-159266826                          | NM_178935:527            | Txlng         | INSIDE                 | 0.229                                                        | 2.150                          | 4533.73            | 9746.57            | 0.493                          | 1915.65            | 945.02             |
| A_68_P26494988 | chr9:48793866-48793910                            | NM_175482:399            | Usp28         | INSIDE                 | 0.229                                                        | 0.611                          | 2573.08            | 1571.55            | 0.140                          | 1976.90            | 276.95             |
| A_68_P26815581 | chr9:108480573-108480617                          | NM_031392:407            | Wdr6          | INSIDE                 | 0.229                                                        | 1.755                          | 3847.46            | 6751.21            | 0.402                          | 2617.85            | 1051.32            |
| A_68_P28765737 | chr12:117285901-117285952                         | NM_001004066:-8          | Zfp386        | PROMOTER               | 0.229                                                        | 0.483                          | 1357.82            | 655.37             | 0.110                          | 1100.32            | 121.55             |
| A_68_P32795837 | chrX:160396347-160396391                          | NM_009453:230            | Zrsr2         | INSIDE                 | 0.229                                                        | 1.434                          | 1335.87            | 1915.14            | 0.328                          | 616.79             | 202.08             |
| A_68_P20395056 | chr1:82835794-82835840                            | NM_010472:-241           | Agfig1        | PROMOTER               | 0.228                                                        | 0.582                          | 1367.22            | 795.85             | 0.132                          | 1049.33            | 139.00             |
| A_68_P26351650 | chr9:22193454-22193498                            | NM_028390:174            | Anln          | INSIDE                 | 0.228                                                        | 0.582                          | 1163.79            | 677.46             | 0.132                          | 892.77             | 118.28             |
| A_68_P28836955 | chr13:14156050-14156094                           | NM_194262:14             | Arid4b        | INSIDE                 | 0.228                                                        | 0.499                          | 1692.12            | 844.59             | 0.114                          | 1468.23            | 166.81             |
| A_68_P25288544 | chr7:91558102-91558146                            | NM_007488:345            | Arnt2         | INSIDE                 | 0.228                                                        | 0.557                          | 1228.88            | 683.88             | 0.127                          | 943.46             | 119.77             |
| A_68_P31213160 | chr17:47747908-47747952                           | NM_016859:511            | Bysl          | INSIDE                 | 0.228                                                        | 0.669                          | 1659.15            | 1110.35            | 0.153                          | 1158.95            | 177.21             |
| A_68_P31921020 | chr19:4097226-4097270                             | NM_026373:-102           | Cdk2ap2       | PROMOTER               | 0.228                                                        | 0.505                          | 3118.73            | 1573.89            | 0.115                          | 2145.91            | 246.50             |
| A_68_P31374517 | chr17:79336211-79336255                           | NM_001024806:178         | Cebpz         | INSIDE                 | 0.228                                                        | 0.527                          | 1260.97            | 664.02             | 0.120                          | 1009.35            | 121.04             |
| A_68_P28890408 | chr13:25147877-25147921                           | NM_001195617:26          | Dcdc2a        | INSIDE                 | 0.228                                                        | 0.634                          | 1612.26            | 1022.62            | 0.145                          | 1252.37            | 181.08             |
| A_68_P29787827 | chr14:87540778-87540822                           | NM_019670:121            | Diap3         | INSIDE                 | 0.228                                                        | 0.321                          | 2073.67            | 665.05             | 0.073                          | 1605.15            | 117.38             |
| A_68_P21584024 | chr2:121854878-121854922                          | NM_144545:542            | Eif3j         | INSIDE                 | 0.228                                                        | 0.531                          | 1199.32            | 636.98             | 0.121                          | 976.93             | 118.55             |
| A_68_P25328172 | chr7:100228249-100228299                          | NM_021427:-114           | Fam181b       | PROMOTER               | 0.228                                                        | 0.622                          | 1141.45            | 709.95             | 0.142                          | 869.60             | 123.51             |
| A_68_P21007905 | chr2:11699155-11699199                            | NM_015792:-22            | Fbxo18        | DIVERGENT_PROMOTER     | 0.228                                                        | 0.687                          | 6451.61            | 4434.24            | 0.157                          | 4539.72            | 711.85             |
| A_68_P21010261 | chr2:12223501-12223545                            | NM_001001309:25          | Irga8         | INSIDE                 | 0.228                                                        | 0.609                          | 1016.91            | 618.98             | 0.139                          | 853.94             | 118.60             |
| A_68_P25044857 | chr7:35438615-35438659                            | NM_146188:-776           | Kctd15        | PROMOTER               | 0.228                                                        | 0.466                          | 3075.38            | 1431.70            | 0.106                          | 2089.06            | 221.55             |

| ProbeName      | Target position of probe on CpG island microarray | TargetID               | GeneSymbol    | CpG island Description | Ratio of relative methylation (TiO <sub>2</sub> -NP/Vehicle) | Sham group                     |                    |                    | TiO <sub>2</sub> -H group      |                    |                    |
|----------------|---------------------------------------------------|------------------------|---------------|------------------------|--------------------------------------------------------------|--------------------------------|--------------------|--------------------|--------------------------------|--------------------|--------------------|
|                |                                                   |                        |               |                        |                                                              | Relative methylation (Cy5/Cy3) | Cy3 signal (Input) | Cy5 signal (MeDIP) | Relative methylation (Cy5/Cy3) | Cy3 signal (Input) | Cy5 signal (MeDIP) |
| A_68_P32252886 | chrX:10294260-10294304                            | NM_001166635-208       | Mid1ip1       | PROMOTER               | 0.228                                                        | 1.749                          | 3300.16            | 5771.56            | 0.400                          | 1260.09            | 503.43             |
| A_68_P21141629 | chr2:37214726-37214772                            | NM_026176:104          | Pdcl          | INSIDE                 | 0.228                                                        | 0.656                          | 929.43             | 609.90             | 0.150                          | 810.06             | 121.39             |
| A_68_P27857781 | chr11:62946689-62946733                           | NM_008885:1699         | Pmp22         | INSIDE                 | 0.228                                                        | 0.715                          | 2391.88            | 1709.08            | 0.163                          | 1719.60            | 280.20             |
| A_68_P29618605 | chr14:56197304-56197348                           | NM_011189:-4           | Psmc1         | PROMOTER               | 0.228                                                        | 0.455                          | 2276.43            | 1036.04            | 0.104                          | 1636.18            | 170.03             |
| A_68_P20557410 | chr1:121400955-121400999                          | NM_022327:383          | Ralb          | INSIDE                 | 0.228                                                        | 0.470                          | 1289.95            | 606.52             | 0.107                          | 1098.83            | 117.85             |
| A_68_P20722064 | chr1:154472045-154472089                          | NM_016846:175          | Rgl1          | INSIDE                 | 0.228                                                        | 0.518                          | 2141.40            | 1108.91            | 0.118                          | 1617.76            | 190.72             |
| A_68_P26809960 | chr9:107515313-107515362                          | NM_001042779-3765      | Sema3b        | PROMOTER               | 0.228                                                        | 0.430                          | 1862.68            | 801.38             | 0.098                          | 1275.80            | 125.33             |
| A_68_P23436702 | chr4:154524641-154524685                          | NM_011385:71982        | Ski           | DOWNSTREAM             | 0.228                                                        | 0.707                          | 2730.88            | 1930.75            | 0.161                          | 1921.47            | 309.69             |
| A_68_P25016046 | chr7:27981095-27981139                            | NM_001046637-337       | Snrpa         | PROMOTER               | 0.228                                                        | 0.556                          | 2592.11            | 1441.01            | 0.127                          | 1811.49            | 230.09             |
| A_68_P21612309 | chr2:127074111-127074155                          | NM_175145:422          | Tmem127       | INSIDE                 | 0.228                                                        | 0.615                          | 2264.80            | 1391.86            | 0.140                          | 2102.52            | 294.53             |
| A_68_P22372021 | chr3:100726069-100726113                          | NM_001165953-325       | Trim45        | PROMOTER               | 0.228                                                        | 0.724                          | 3143.26            | 2274.43            | 0.165                          | 2238.33            | 369.09             |
| A_68_P20778488 | chr1:164500535-164500579                          | NM_016796:-402         | Vamp4         | PROMOTER               | 0.228                                                        | 0.611                          | 1052.93            | 643.04             | 0.139                          | 869.56             | 120.86             |
| A_68_P25026079 | chr7:30023546-30023590                            | NM_001110201:227       | Yif1b         | INSIDE                 | 0.228                                                        | 0.623                          | 1092.98            | 680.64             | 0.142                          | 863.65             | 122.69             |
| A_68_P20914304 | chr1:189432802-189432861                          | ENSMUST00000110939:-76 |               | PROMOTER               | 0.228                                                        | 0.647                          | 1454.05            | 941.09             | 0.148                          | 1143.24            | 168.99             |
| A_68_P26132765 | chr8:107813703-107813757                          | NM_001166394:-302      | 4931428F04Rik | PROMOTER               | 0.227                                                        | 0.493                          | 1401.74            | 691.31             | 0.112                          | 1099.34            | 123.31             |
| A_68_P31549440 | chr18:22503476-22503523                           | NM_001167777-90        | Asx13         | PROMOTER               | 0.227                                                        | 1.545                          | 1348.28            | 2083.47            | 0.350                          | 980.71             | 343.59             |
| A_68_P28725223 | chr12:109242384-109242437                         | NM_001079883-786       | Bcl11b        | PROMOTER               | 0.227                                                        | 0.611                          | 1322.10            | 807.96             | 0.139                          | 977.03             | 135.75             |
| A_68_P27308091 | chr10:84849925-84849970                           | NM_028709:389          | Btdb11        | INSIDE                 | 0.227                                                        | 0.598                          | 1118.31            | 668.60             | 0.136                          | 904.39             | 122.55             |
| A_68_P27702677 | chr11:34647134-34647181                           | NM_027411:-14          | Ccdc99        | PROMOTER               | 0.227                                                        | 0.567                          | 1373.61            | 779.00             | 0.129                          | 949.47             | 122.32             |
| A_68_P28555790 | chr12:77866473-77866523                           | NM_206534:-61          | Churc1        | PROMOTER               | 0.227                                                        | 0.538                          | 1321.97            | 711.28             | 0.122                          | 1081.85            | 132.15             |
| A_68_P25693340 | chr8:17534794-17534838                            | NM_053171:569          | Csm1          | INSIDE                 | 0.227                                                        | 0.643                          | 1476.56            | 950.06             | 0.146                          | 1076.95            | 157.17             |
| A_68_P23203752 | chr4:109652831-109652875                          | NM_172296:2223         | Dmrta2        | INSIDE                 | 0.227                                                        | 0.473                          | 1258.70            | 594.89             | 0.107                          | 1156.24            | 123.89             |
| A_68_P29615091 | chr14:55545244-55545288                           | NM_010112:359          | Efs           | INSIDE                 | 0.227                                                        | 0.697                          | 2996.73            | 2088.62            | 0.158                          | 2246.55            | 354.71             |
| A_68_P25307424 | chr7:96553350-96553394                            | NM_008055:497          | Fzd4          | INSIDE                 | 0.227                                                        | 0.603                          | 1060.52            | 639.19             | 0.137                          | 849.41             | 116.30             |
| A_68_P20875120 | chr1:182262437-182262486                          | NR_003623:-1781        | Gm5069        | PROMOTER               | 0.227                                                        | 0.471                          | 1415.53            | 667.34             | 0.107                          | 1133.67            | 121.35             |
| A_68_P25957090 | chr8:74012768-74012812                            | NM_032544:789          | Gtpbp3        | INSIDE                 | 0.227                                                        | 0.615                          | 1880.96            | 1156.69            | 0.140                          | 1471.00            | 205.56             |
| A_68_P23560507 | chr5:28398167-28398211                            | NM_153526:237          | Insig1        | INSIDE                 | 0.227                                                        | 0.447                          | 2884.31            | 1288.71            | 0.102                          | 2063.02            | 209.57             |
| A_68_P22612825 | chr3:145812772-145812816                          | NM_026656:-2           | Mcoln2        | PROMOTER               | 0.227                                                        | 0.553                          | 1541.66            | 852.82             | 0.125                          | 1200.17            | 150.48             |
| A_68_P29020009 | chr13:48641246-48641290                           | NR_029725:-7627        | Mirlet7a-1    | PROMOTER               | 0.227                                                        | 0.342                          | 1970.65            | 673.30             | 0.078                          | 1617.68            | 125.47             |
| A_68_P25031432 | chr7:31206971-31207015                            | NM_172142:-1330        | Nfkbid        | DIVERGENT_PROMOTER     | 0.227                                                        | 0.654                          | 1051.60            | 688.17             | 0.148                          | 792.05             | 117.47             |
| A_68_P23894275 | chr5:92864051-92864096                            | NM_183392:152          | Nup54         | INSIDE                 | 0.227                                                        | 0.635                          | 5751.09            | 3654.74            | 0.144                          | 4115.74            | 592.88             |
| A_68_P31849787 | chr18:78033303-78033347                           | NM_013831:36           | Pstpip2       | INSIDE                 | 0.227                                                        | 0.557                          | 3770.04            | 2098.95            | 0.126                          | 2881.75            | 364.01             |
| A_68_P31375198 | chr17:79451766-79451811                           | NM_027455:543          | Qpet          | INSIDE                 | 0.227                                                        | 0.551                          | 1256.17            | 692.22             | 0.125                          | 989.53             | 123.97             |
| A_68_P23313959 | chr4:132324309-132324353                          | NM_011284:56           | Rpa2          | INSIDE                 | 0.227                                                        | 1.401                          | 2229.35            | 3122.60            | 0.318                          | 1580.26            | 503.03             |
| A_68_P27005216 | chr10:23507028-23507072                           | NM_011295:-35          | Rps12         | DIVERGENT_PROMOTER     | 0.227                                                        | 0.325                          | 1968.49            | 640.42             | 0.074                          | 1604.57            | 118.75             |
| A_68_P26873361 | chr9:119488531-119488575                          | NM_021544:-418         | Scn5a         | PROMOTER               | 0.227                                                        | 0.637                          | 1505.63            | 959.34             | 0.145                          | 1164.02            | 168.23             |
| A_68_P22342533 | chr3:94964490-94964535                            | NM_011351:-3783        | Sema6c        | PROMOTER               | 0.227                                                        | 0.645                          | 1517.74            | 979.46             | 0.146                          | 1204.60            | 176.39             |
| A_68_P30979328 | chr16:94087095-94087143                           | NM_011377:1614         | Sim2          | INSIDE                 | 0.227                                                        | 0.487                          | 1307.82            | 636.43             | 0.110                          | 1033.86            | 114.14             |
| A_68_P28689579 | chr12:103367433-103367477                         | NM_172152:-174         | Slc24a4       | PROMOTER               | 0.227                                                        | 0.522                          | 2343.86            | 1222.49            | 0.118                          | 1721.88            | 203.96             |
| A_68_P31836541 | chr18:75528547-75528591                           | NM_001042660:1550      | Smad7         | INSIDE                 | 0.227                                                        | 0.433                          | 1579.90            | 684.75             | 0.098                          | 1186.66            | 116.88             |
| A_68_P27687371 | chr11:32105349-32105400                           | NM_030093:-40          | Snrnp25       | DIVERGENT_PROMOTER     | 0.227                                                        | 0.697                          | 1684.48            | 1174.71            | 0.158                          | 1181.82            | 186.84             |
| A_68_P25016043 | chr7:27980751-27980801                            | NM_001046637:3         | Snrpa         | INSIDE                 | 0.227                                                        | 0.682                          | 976.34             | 666.12             | 0.155                          | 786.18             | 121.56             |
| A_68_P32143669 | chr19:46471505-46471549                           | NM_001025391:119       | Sufu          | INSIDE                 | 0.227                                                        | 0.568                          | 3769.01            | 2140.86            | 0.129                          | 2680.27            | 344.84             |
| A_68_P30405824 | chr15:86045163-86045207                           | NM_145476:296          | Tbc1d22a      | INSIDE                 | 0.227                                                        | 1.886                          | 5680.44            | 10712.98           | 0.428                          | 3911.71            | 1672.61            |
| A_68_P25618380 | chr8:4677371-4677415                              | ENSMUST00000058918:973 |               | DOWNSTREAM             | 0.227                                                        | 0.570                          | 2730.49            | 1557.32            | 0.130                          | 1877.95            | 243.39             |
| A_68_P25087380 | chr7:51684809-51684853                            | ENSMUST00000127790:443 |               | INSIDE                 | 0.227                                                        | 1.595                          | 1141.73            | 1821.11            | 0.362                          | 850.97             | 308.14             |
| A_68_P27921678 | chr11:74462698-74462742                           | NM_001081158:-276      | 1300001101Rik | PROMOTER               | 0.226                                                        | 0.460                          | 1396.56            | 643.09             | 0.104                          | 1256.78            | 130.76             |
| A_68_P30403116 | chr15:85641498-85641553                           | NM_001164625:602       | 2210021J22Rik | INSIDE                 | 0.226                                                        | 0.701                          | 2134.13            | 1496.30            | 0.158                          | 1606.59            | 254.60             |
| A_68_P29699593 | chr14:70553524-70553568                           | NM_146055:52           | 2610301G19Rik | INSIDE                 | 0.226                                                        | 0.660                          | 2993.10            | 1974.52            | 0.149                          | 2377.12            | 354.63             |
| A_68_P26595209 | chr9:66643358-66643402                            | NM_177583:-150         | Aph1b         | PROMOTER               | 0.226                                                        | 0.460                          | 1352.03            | 621.39             | 0.104                          | 1192.41            | 123.65             |
| A_68_P29482769 | chr14:27457424-27457468                           | NM_007479:-236         | Arf4          | PROMOTER               | 0.226                                                        | 0.645                          | 3679.84            | 2373.45            | 0.146                          | 2565.68            | 374.55             |

| ProbeName      | Target position of probe on CpG island microarray | TargetID            | GeneSymbol    | CpG island Description | Ratio of relative methylation (TiO <sub>2</sub> -NP/Vehicle) | Sham group                     |                    |                    | TiO <sub>2</sub> -H group      |                    |                    |
|----------------|---------------------------------------------------|---------------------|---------------|------------------------|--------------------------------------------------------------|--------------------------------|--------------------|--------------------|--------------------------------|--------------------|--------------------|
|                |                                                   |                     |               |                        |                                                              | Relative methylation (Cy5/Cy3) | Cy3 signal (Input) | Cy5 signal (MeDIP) | Relative methylation (Cy5/Cy3) | Cy3 signal (Input) | Cy5 signal (MeDIP) |
| A_68_P31112417 | chr17:26918235-26918282                           | NM_172149:235       | Bnip1         | INSIDE                 | 0.226                                                        | 0.574                          | 1232.99            | 707.88             | 0.130                          | 894.82             | 116.33             |
| A_68_P26809310 | chr9:107429107-107429155                          | NM_001174047:126920 | Caena2d2      | INSIDE                 | 0.226                                                        | 0.430                          | 1548.14            | 665.56             | 0.097                          | 1204.64            | 117.14             |
| A_68_P28688780 | chr12:103213637-103213681                         | NM_016856:-525      | Cpsf2         | PROMOTER               | 0.226                                                        | 0.477                          | 1300.12            | 619.67             | 0.108                          | 1093.07            | 117.81             |
| A_68_P23146396 | chr4:99496193-99496248                            | NM_145549:30        | Efcab7        | INSIDE                 | 0.226                                                        | 0.593                          | 1339.13            | 793.48             | 0.134                          | 923.42             | 123.66             |
| A_68_P23232034 | chr4:116691797-116691854                          | NM_175135:-187      | Eif2b3        | PROMOTER               | 0.226                                                        | 0.465                          | 1277.46            | 593.48             | 0.105                          | 1150.60            | 120.98             |
| A_68_P20900748 | chr1:187186729-187186773                          | NM_029735:-223      | Eprs          | PROMOTER               | 0.226                                                        | 0.542                          | 1199.24            | 649.65             | 0.122                          | 981.95             | 120.28             |
| A_68_P21240630 | chr2:57090894-57090938                            | NM_010274:124       | Gpd2          | INSIDE                 | 0.226                                                        | 0.409                          | 1920.58            | 784.94             | 0.092                          | 1393.48            | 128.66             |
| A_68_P29942855 | chr14:119537625-119537669                         | NM_015820:160       | Hs6st3        | INSIDE                 | 0.226                                                        | 0.665                          | 2929.87            | 1949.12            | 0.151                          | 2206.34            | 332.32             |
| A_68_P31257378 | chr17:56765895-56765939                           | NM_028782:410       | Lonp1         | INSIDE                 | 0.226                                                        | 0.533                          | 1370.49            | 730.40             | 0.121                          | 1002.40            | 120.89             |
| A_68_P25979818 | chr8:79426066-79426110                            | NM_001083906:-318   | Nr3c2         | DIVERGENT_PROMOTER     | 0.226                                                        | 0.646                          | 2683.35            | 1734.08            | 0.146                          | 1859.18            | 271.02             |
| A_68_P27211072 | chr10:66748247-66748295                           | NM_001036293:-241   | Nrbf2         | PROMOTER               | 0.226                                                        | 0.496                          | 1248.05            | 618.48             | 0.112                          | 1043.39            | 116.87             |
| A_68_P32552413 | chrX:96086058-96086102                            | NM_052976:244       | Ophn1         | INSIDE                 | 0.226                                                        | 1.785                          | 1041.69            | 1858.89            | 0.403                          | 475.40             | 191.68             |
| A_68_P31621133 | chr18:36124466-36124510                           | NM_028707:0         | Psd2          | INSIDE                 | 0.226                                                        | 0.673                          | 1959.00            | 1317.70            | 0.152                          | 1477.38            | 224.43             |
| A_68_P22413314 | chr3:108357099-108357143                          | NR_028538:200       | Scarna2       | DOWNSTREAM             | 0.226                                                        | 0.642                          | 1098.59            | 705.00             | 0.145                          | 833.93             | 120.84             |
| A_68_P20976256 | chr2:5816062-5816106                              | NM_021305:315       | Sec61a2       | INSIDE                 | 0.226                                                        | 0.459                          | 1341.45            | 615.26             | 0.104                          | 1155.91            | 120.02             |
| A_68_P20240053 | chr1:55084178-55084222                            | NM_031179:122       | Sf3b1         | INSIDE                 | 0.226                                                        | 0.444                          | 1384.17            | 614.65             | 0.100                          | 1143.74            | 114.79             |
| A_68_P24134132 | chr5:139676747-139676791                          | NM_024451:145       | Sun1          | INSIDE                 | 0.226                                                        | 0.529                          | 4932.70            | 2610.57            | 0.120                          | 3774.58            | 451.15             |
| A_68_P23608243 | chr5:36872903-36872947                            | NM_001113364:348    | Tbc1d14       | INSIDE                 | 0.226                                                        | 0.564                          | 1122.37            | 633.34             | 0.128                          | 919.62             | 117.39             |
| A_68_P30508110 | chr16:4077547-4077591                             | NM_026508:242       | Trap1         | INSIDE                 | 0.226                                                        | 0.516                          | 4083.99            | 2108.96            | 0.116                          | 3328.19            | 387.58             |
| A_68_P22372357 | chr3:100773219-100773269                          | NM_001013026:342    | Ttf2          | INSIDE                 | 0.226                                                        | 0.574                          | 1209.86            | 695.00             | 0.130                          | 914.88             | 118.99             |
| A_68_P25505329 | chr7:134507375-134507419                          | NM_175560:12168     | Zfp747        | DOWNSTREAM             | 0.226                                                        | 0.581                          | 2164.11            | 1257.35            | 0.131                          | 1676.62            | 220.09             |
| A_68_P28613115 | chr12:88288746-88288790                           | NM_173735:476       | 2310044G17Rik | INSIDE                 | 0.225                                                        | 1.409                          | 2822.27            | 3976.08            | 0.317                          | 1969.41            | 624.83             |
| A_68_P30927982 | chr16:85173354-85173398                           | NM_001198823:576    | App           | INSIDE                 | 0.225                                                        | 0.442                          | 1681.20            | 742.41             | 0.100                          | 1203.18            | 119.72             |
| A_68_P30476330 | chr15:98593656-98593700                           | NM_007478:-129      | Arf3          | PROMOTER               | 0.225                                                        | 0.595                          | 1091.17            | 649.54             | 0.134                          | 882.99             | 118.50             |
| A_68_P32208210 | chr19:57684728-57684772                           | NM_181415:-773      | Atrnl1        | PROMOTER               | 0.225                                                        | 0.598                          | 1168.08            | 698.32             | 0.135                          | 866.06             | 116.62             |
| A_68_P27360780 | chr10:94151776-94151822                           | NM_029852:264       | Ccdc41        | INSIDE                 | 0.225                                                        | 0.510                          | 1519.35            | 774.16             | 0.114                          | 1119.43            | 128.11             |
| A_68_P26543684 | chr9:57613558-57613602                            | NM_007713:87        | Clk3          | INSIDE                 | 0.225                                                        | 0.523                          | 1385.99            | 724.53             | 0.118                          | 1029.36            | 121.22             |
| A_68_P31420723 | chr17:87424816-87424860                           | NM_019936:-62       | Cript         | DIVERGENT_PROMOTER     | 0.225                                                        | 0.716                          | 1836.76            | 1314.24            | 0.161                          | 1325.06            | 213.69             |
| A_68_P28697531 | chr12:104664203-104664252                         | NM_020494:-150      | Ddx24         | DIVERGENT_PROMOTER     | 0.225                                                        | 0.454                          | 1592.75            | 723.07             | 0.102                          | 1138.88            | 116.34             |
| A_68_P25672259 | chr8:14096757-14096801                            | NM_001145965:904    | Dlgap2        | INSIDE                 | 0.225                                                        | 0.657                          | 984.04             | 646.62             | 0.148                          | 783.35             | 115.74             |
| A_68_P20558188 | chr1:121545438-121545482                          | NM_145506:117       | Epb4.115      | INSIDE                 | 0.225                                                        | 0.421                          | 2282.47            | 960.48             | 0.095                          | 1827.99            | 173.00             |
| A_68_P22803177 | chr4:28740631-28740686                            | NM_001122889:364    | Epha7         | INSIDE                 | 0.225                                                        | 0.622                          | 1204.78            | 749.81             | 0.140                          | 860.74             | 120.32             |
| A_68_P29529255 | chr14:35124395-35124439                           | NM_008133:504       | Glud1         | INSIDE                 | 0.225                                                        | 0.419                          | 1938.13            | 811.39             | 0.094                          | 1549.72            | 146.20             |
| A_68_P27067366 | chr10:36694758-36694802                           | NM_008229:431       | Hdac2         | INSIDE                 | 0.225                                                        | 0.338                          | 1989.68            | 672.65             | 0.076                          | 1573.38            | 119.47             |
| A_68_P22957172 | chr4:59594608-59594652                            | NM_024255:196       | Hsd12         | INSIDE                 | 0.225                                                        | 0.569                          | 1682.05            | 957.35             | 0.128                          | 1278.50            | 164.03             |
| A_68_P28556955 | chr12:78063502-78063546                           | NM_001146176:-289   | Max           | PROMOTER               | 0.225                                                        | 0.632                          | 1880.31            | 1187.61            | 0.142                          | 1410.83            | 200.35             |
| A_68_P23245808 | chr4:119165389-119165433                          | NM_177572:-207      | Rimk1a        | PROMOTER               | 0.225                                                        | 0.712                          | 1299.82            | 924.89             | 0.160                          | 1104.98            | 177.24             |
| A_68_P21212081 | chr2:51003539-51003583                            | NM_028810:1071      | Rnd3          | INSIDE                 | 0.225                                                        | 0.673                          | 4864.49            | 3271.81            | 0.151                          | 3367.42            | 509.13             |
| A_68_P21095247 | chr2:28980444-28980489                            | NM_198033:-45       | Setx          | PROMOTER               | 0.225                                                        | 0.478                          | 3232.84            | 1546.02            | 0.108                          | 2561.81            | 276.11             |
| A_68_P27285561 | chr10:80261463-80261507                           | NM_013651:5         | Sf3a2         | INSIDE                 | 0.225                                                        | 0.461                          | 1503.32            | 692.75             | 0.104                          | 1146.08            | 118.93             |
| A_68_P28161646 | chr11:116714298-116714343                         | NM_011358:88        | Srsf2         | INSIDE                 | 0.225                                                        | 0.417                          | 1703.04            | 710.00             | 0.094                          | 1296.28            | 121.79             |
| A_68_P24134129 | chr5:139676494-139676538                          | NM_024451:-107      | Sun1          | PROMOTER               | 0.225                                                        | 0.479                          | 2168.67            | 1039.52            | 0.108                          | 1474.69            | 159.26             |
| A_68_P28974118 | chr13:40818211-40818255                           | NM_001122948:7580   | Tcfap2a       | INSIDE                 | 0.225                                                        | 0.595                          | 1079.99            | 642.85             | 0.134                          | 889.72             | 119.32             |
| A_68_P24459352 | chr6:53770524-53770568                            | NM_025817:273       | Tril          | INSIDE                 | 0.225                                                        | 0.675                          | 1095.07            | 739.25             | 0.152                          | 807.73             | 132.26             |
| A_68_P30140504 | chr15:36723408-36723452                           | NM_011740:863       | Ywhaz         | INSIDE                 | 0.225                                                        | 0.498                          | 2368.50            | 1179.93            | 0.112                          | 1691.16            | 189.74             |
| A_68_P27892804 | chr11:68873951-68873999                           | NM_028005:698       | 2310047M10Rik | INSIDE                 | 0.224                                                        | 0.393                          | 1791.71            | 703.54             | 0.088                          | 1346.38            | 118.62             |
| A_68_P32759042 | chrX:151697320-151697364                          | NM_019736:300       | Acot9         | INSIDE                 | 0.224                                                        | 1.545                          | 1448.06            | 2236.73            | 0.347                          | 587.84             | 203.70             |
| A_68_P25960288 | chr8:74763954-74763998                            | NM_007456:-54       | Ap1m1         | PROMOTER               | 0.224                                                        | 0.419                          | 1594.49            | 668.04             | 0.094                          | 1274.85            | 119.73             |
| A_68_P28191918 | chr11:121533998-121534047                         | NM_178664:443       | B3gnt1        | INSIDE                 | 0.224                                                        | 1.567                          | 1903.51            | 2983.37            | 0.351                          | 1321.69            | 464.28             |
| A_68_P26846738 | chr9:114752895-114752940                          | NM_027294:353       | Cmtm8         | INSIDE                 | 0.224                                                        | 0.402                          | 2429.36            | 977.79             | 0.090                          | 1935.55            | 174.75             |
| A_68_P21784861 | chr2:158594102-158594146                          | NM_027975:290       | Fam83d        | INSIDE                 | 0.224                                                        | 0.294                          | 3051.25            | 896.00             | 0.066                          | 2377.29            | 156.69             |

| ProbeName      | Target position of probe on CpG island microarray | TargetID               | GeneSymbol    | CpG island Description | Ratio of relative methylation (TiO <sub>2</sub> -NP/Vehicle) | Sham group                     |                    |                    | TiO <sub>2</sub> -H group      |                    |                    |
|----------------|---------------------------------------------------|------------------------|---------------|------------------------|--------------------------------------------------------------|--------------------------------|--------------------|--------------------|--------------------------------|--------------------|--------------------|
|                |                                                   |                        |               |                        |                                                              | Relative methylation (Cy5/Cy3) | Cy3 signal (Input) | Cy5 signal (MeDIP) | Relative methylation (Cy5/Cy3) | Cy3 signal (Input) | Cy5 signal (MeDIP) |
| A_68_P24839025 | chr6:128388883-128388942                          | NR_028592:138          | Gm10069       | INSIDE                 | 0.224                                                        | 0.491                          | 1224.64            | 600.76             | 0.110                          | 1049.15            | 115.49             |
| A_68_P24118365 | chr5:136364296-136364340                          | NM_013560:530          | Hspb1         | INSIDE                 | 0.224                                                        | 0.692                          | 2438.28            | 1688.50            | 0.155                          | 1753.64            | 272.50             |
| A_68_P27943941 | chr11:78349868-78349912                           | NM_018854:447          | Ift20         | DIVERGENT_PROMOTER     | 0.224                                                        | 0.677                          | 994.15             | 672.98             | 0.152                          | 774.97             | 117.66             |
| A_68_P26065134 | chr8:94881423-94881467                            | NM_018826:250          | Irx5          | DIVERGENT_PROMOTER     | 0.224                                                        | 0.710                          | 2622.75            | 1860.87            | 0.159                          | 1783.03            | 282.91             |
| A_68_P28679266 | chr12:101203176-101203220                         | NM_001164426:490       | Kenk13        | INSIDE                 | 0.224                                                        | 0.548                          | 1392.85            | 763.65             | 0.123                          | 1007.56            | 123.49             |
| A_68_P28206067 | chr12:5381571-5381617                             | NM_001164493:894       | Klhl29        | INSIDE                 | 0.224                                                        | 0.386                          | 1891.09            | 730.58             | 0.086                          | 1389.97            | 120.09             |
| A_68_P28291795 | chr12:25515888-25515932                           | NM_001083341:553       | Mboat2        | PROMOTER               | 0.224                                                        | 0.425                          | 1799.10            | 765.28             | 0.095                          | 1226.85            | 116.65             |
| A_68_P29162321 | chr13:78342782-78342832                           | NM_010151:4563         | Nr2f1         | PROMOTER               | 0.224                                                        | 0.582                          | 1214.72            | 707.18             | 0.130                          | 912.49             | 119.04             |
| A_68_P25979819 | chr8:79426229-79426273                            | NM_001083906:156       | Nr3c2         | DIVERGENT_PROMOTER     | 0.224                                                        | 0.633                          | 1069.13            | 676.55             | 0.142                          | 853.53             | 121.06             |
| A_68_P29269014 | chr13:101322735-101322779                         | NM_008756:303          | Ocln          | PROMOTER               | 0.224                                                        | 1.359                          | 5204.64            | 7074.70            | 0.305                          | 3479.69            | 1059.69            |
| A_68_P32142236 | chr19:46211273-46211317                           | NM_008852:11521        | Pitx3         | INSIDE                 | 0.224                                                        | 1.389                          | 2293.90            | 3186.51            | 0.311                          | 1545.80            | 480.40             |
| A_68_P23308590 | chr4:131393615-131393659                          | NM_001083119:557       | Ptpru         | INSIDE                 | 0.224                                                        | 1.430                          | 2572.74            | 3680.22            | 0.321                          | 1833.59            | 587.85             |
| A_68_P21783924 | chr2:158436419-158436463                          | NM_009508:53           | Slc32a1       | PROMOTER               | 0.224                                                        | 0.451                          | 2642.45            | 1192.06            | 0.101                          | 2041.59            | 205.90             |
| A_68_P32150751 | chr19:47654747-47654794                           | NM_001164639:262       | Slk           | INSIDE                 | 0.224                                                        | 0.664                          | 1068.65            | 709.14             | 0.149                          | 886.09             | 131.91             |
| A_68_P27673288 | chr11:29073469-29073513                           | NM_134034:584          | Smek2         | INSIDE                 | 0.224                                                        | 0.563                          | 2869.12            | 1616.49            | 0.126                          | 2088.09            | 263.61             |
| A_68_P28160910 | chr11:11655525-11655569                           | NM_009180:428          | St6galnac2    | INSIDE                 | 0.224                                                        | 0.553                          | 1129.88            | 624.68             | 0.124                          | 965.65             | 119.80             |
| A_68_P30510783 | chr16:4558483-4558531                             | NM_031182:1214         | Tcfap4        | INSIDE                 | 0.224                                                        | 0.644                          | 1002.74            | 645.57             | 0.144                          | 820.88             | 118.54             |
| A_68_P30510788 | chr16:4558960-4559004                             | NM_031182:738          | Tcfap4        | INSIDE                 | 0.224                                                        | 0.646                          | 4333.57            | 2798.33            | 0.145                          | 3231.19            | 467.51             |
| A_68_P26564391 | chr9:61221577-61221621                            | NM_001083927:1426      | Tle3          | INSIDE                 | 0.224                                                        | 0.561                          | 1189.27            | 667.05             | 0.126                          | 919.45             | 115.66             |
| A_68_P27845263 | chr11:60691958-60692002                           | NM_001168507:560       | Tmem11        | INSIDE                 | 0.224                                                        | 0.273                          | 5352.00            | 1462.81            | 0.061                          | 4513.81            | 276.73             |
| A_68_P31992848 | chr19:18824278-18824322                           | NM_153417:172          | Trpm6         | PROMOTER               | 0.224                                                        | 0.525                          | 1331.08            | 698.30             | 0.118                          | 1033.08            | 121.53             |
| A_68_P31509666 | chr18:14129064-14129108                           | NM_145492:2156         | Zfp521        | INSIDE                 | 0.224                                                        | 1.826                          | 1431.31            | 2614.02            | 0.409                          | 1103.50            | 451.41             |
| A_68_P28140558 | chr11:113062660-113062712                         | NR_015556:466          | 2610035D17Rik | INSIDE                 | 0.223                                                        | 0.458                          | 1392.18            | 637.90             | 0.102                          | 1134.67            | 115.94             |
| A_68_P22350131 | chr3:96402359-96402403                            | NM_001024851:1822      | Ankrd34a      | INSIDE                 | 0.223                                                        | 0.644                          | 1039.90            | 669.76             | 0.144                          | 816.36             | 117.23             |
| A_68_P26234301 | chr8:125100388-125100432                          | NM_009698:397          | Aprt          | INSIDE                 | 0.223                                                        | 0.607                          | 2351.89            | 1427.00            | 0.135                          | 1568.82            | 211.96             |
| A_68_P24330585 | chr6:30124034-30124078                            | NR_038124:2566         | BB283400      | DIVERGENT_PROMOTER     | 0.223                                                        | 0.446                          | 1567.77            | 698.75             | 0.099                          | 1168.43            | 116.05             |
| A_68_P24004707 | chr5:115021632-115021676                          | NM_001004180:3395      | BC057022      | INSIDE                 | 0.223                                                        | 0.650                          | 3315.15            | 2155.60            | 0.145                          | 2225.50            | 322.35             |
| A_68_P27649060 | chr11:23977147-23977191                           | NM_001159289:887       | Bell1a        | PROMOTER               | 0.223                                                        | 0.636                          | 1174.52            | 746.71             | 0.142                          | 836.81             | 118.72             |
| A_68_P20631265 | chr11:135975492-135975536                         | NM_007570:218          | Btg2          | INSIDE                 | 0.223                                                        | 0.494                          | 1402.73            | 693.60             | 0.110                          | 1049.13            | 115.80             |
| A_68_P27902141 | chr11:70501579-70501623                           | NM_001190376:7         | Camta2        | INSIDE                 | 0.223                                                        | 0.408                          | 1899.04            | 774.26             | 0.091                          | 1384.81            | 125.96             |
| A_68_P21101913 | chr2:30061520-30061564                            | NM_172404:323          | Ceb1l         | PROMOTER               | 0.223                                                        | 0.406                          | 3242.53            | 1316.38            | 0.091                          | 2507.03            | 227.35             |
| A_68_P24009178 | chr5:115799183-115799231                          | NM_007748:242          | Cox6a1        | PROMOTER               | 0.223                                                        | 0.642                          | 1190.71            | 764.41             | 0.143                          | 831.42             | 118.85             |
| A_68_P26016160 | chr8:86239497-86239541                            | NM_197982:443          | Ddx39         | INSIDE                 | 0.223                                                        | 0.669                          | 3311.86            | 2216.78            | 0.149                          | 2072.39            | 309.11             |
| A_68_P32087893 | chr19:36131475-36131520                           | NM_008315:353          | Htr7          | INSIDE                 | 0.223                                                        | 0.528                          | 1413.08            | 746.73             | 0.118                          | 997.15             | 117.36             |
| A_68_P25084097 | chr7:51052779-51052823                            | NM_008940:146          | Klk8          | PROMOTER               | 0.223                                                        | 0.654                          | 1079.39            | 705.65             | 0.146                          | 821.74             | 119.64             |
| A_68_P22082254 | chr3:40753323-40753367                            | NM_001040399:1208      | Larp1b        | PROMOTER               | 0.223                                                        | 0.727                          | 2704.73            | 1966.74            | 0.162                          | 2073.35            | 336.45             |
| A_68_P30501455 | chr15:102844938-102844988                         | NR_030526:378          | Mir615        | PROMOTER               | 0.223                                                        | 0.682                          | 1955.63            | 1334.50            | 0.152                          | 1482.50            | 225.64             |
| A_68_P25360744 | chr7:106416416-106416460                          | NM_001043355:417       | Mtap6         | PROMOTER               | 0.223                                                        | 0.511                          | 2418.34            | 1236.69            | 0.114                          | 1740.19            | 198.36             |
| A_68_P22674486 | chr3:156225270-156225314                          | NM_177274:370          | Negr1         | INSIDE                 | 0.223                                                        | 0.573                          | 2338.36            | 1338.93            | 0.128                          | 1657.76            | 212.05             |
| A_68_P32697227 | chrX:136596984-136597028                          | NM_001081668:101       | Nup62cl       | INSIDE                 | 0.223                                                        | 1.655                          | 1194.86            | 1977.34            | 0.370                          | 551.75             | 203.93             |
| A_68_P22207931 | chr3:66789980-66790024                            | NM_025822:409          | Rsrc1         | INSIDE                 | 0.223                                                        | 0.484                          | 1667.13            | 806.64             | 0.108                          | 1515.52            | 163.79             |
| A_68_P32049530 | chr19:28909696-28909740                           | NM_009199:63           | Slc1a1        | INSIDE                 | 0.223                                                        | 0.399                          | 2660.52            | 1061.46            | 0.089                          | 1677.45            | 149.03             |
| A_68_P27327921 | chr10:88349290-88349347                           | NM_145423:582          | Slc5a8        | INSIDE                 | 0.223                                                        | 0.641                          | 1035.31            | 663.66             | 0.143                          | 815.56             | 116.52             |
| A_68_P28402110 | chr12:46174903-46174947                           | NM_144552:546          | Stxbp6        | INSIDE                 | 0.223                                                        | 0.691                          | 2217.95            | 1531.70            | 0.154                          | 1492.17            | 229.35             |
| A_68_P31187140 | chr17:43154341-43154385                           | NM_178589:859          | Tnfrsf21      | INSIDE                 | 0.223                                                        | 1.504                          | 3996.57            | 6010.79            | 0.335                          | 2823.24            | 946.31             |
| A_68_P31501878 | chr18:12802774-12802818                           | NM_028341:755          | Ttc39c        | INSIDE                 | 0.223                                                        | 0.558                          | 1396.43            | 778.72             | 0.124                          | 992.46             | 123.39             |
| A_68_P30579666 | chr16:18426377-18426421                           | NM_013711:111          | Txnrd2        | PROMOTER               | 0.223                                                        | 0.561                          | 1220.57            | 684.81             | 0.125                          | 1009.17            | 126.49             |
| A_68_P31255135 | chr17:56442788-56442838                           | NM_001111078:923       | Uhrf1         | PROMOTER               | 0.223                                                        | 0.671                          | 1245.67            | 835.51             | 0.150                          | 764.21             | 114.41             |
| A_68_P26874902 | chr9:119804502-119804546                          | NM_026236:512          | Wdr48         | INSIDE                 | 0.223                                                        | 0.440                          | 1385.24            | 609.24             | 0.098                          | 1180.24            | 115.63             |
| A_68_P30421093 | chr15:88582624-88582670                           | NM_181412:506          | Zbed4         | INSIDE                 | 0.223                                                        | 0.526                          | 1384.33            | 728.62             | 0.117                          | 1044.77            | 122.49             |
| A_68_P24195533 | chr5:152036016-152036060                          | ENSMUST00000129088:311 |               | INSIDE                 | 0.223                                                        | 0.453                          | 1941.21            | 879.85             | 0.101                          | 1559.84            | 157.49             |

| ProbeName      | Target position of probe on CpG island microarray | TargetID               | GeneSymbol    | CpG island Description | Ratio of relative methylation (TiO <sub>2</sub> -NP/Vehicle) | Sham group                     |                    |                    | TiO <sub>2</sub> -H group      |                    |                    |
|----------------|---------------------------------------------------|------------------------|---------------|------------------------|--------------------------------------------------------------|--------------------------------|--------------------|--------------------|--------------------------------|--------------------|--------------------|
|                |                                                   |                        |               |                        |                                                              | Relative methylation (Cy5/Cy3) | Cy3 signal (Input) | Cy5 signal (MeDIP) | Relative methylation (Cy5/Cy3) | Cy3 signal (Input) | Cy5 signal (MeDIP) |
| A_68_P21341868 | chr2:74975538-74975582                            | ENSMUST00000143898:295 |               | INSIDE                 | 0.223                                                        | 0.550                          | 1113.90            | 613.12             | 0.123                          | 975.05             | 119.72             |
| A_68_P29157707 | chr13:77274878-77274925                           | NM_001081353:105       | 2210408I21Rik | INSIDE                 | 0.222                                                        | 0.579                          | 1285.00            | 743.45             | 0.129                          | 909.28             | 116.89             |
| A_68_P28155138 | chr11:115626737-115626781                         | NM_028014:12           | 2310067B10Rik | INSIDE                 | 0.222                                                        | 0.657                          | 1110.69            | 729.25             | 0.146                          | 842.23             | 122.66             |
| A_68_P31809744 | chr18:70631379-70631435                           | NM_172967:728          | 4930503L19Rik | INSIDE                 | 0.222                                                        | 0.629                          | 1113.79            | 700.24             | 0.139                          | 864.49             | 120.41             |
| A_68_P30778447 | chr16:55933919-55933975                           | NM_028815:1015         | Cep97         | INSIDE                 | 0.222                                                        | 0.440                          | 1614.04            | 710.87             | 0.098                          | 1224.26            | 119.86             |
| A_68_P23904976 | chr5:96591506-96591557                            | NM_144910:-522         | Cnot6l        | PROMOTER               | 0.222                                                        | 1.477                          | 2018.15            | 2981.57            | 0.329                          | 1455.09            | 478.23             |
| A_68_P28593010 | chr12:84827335-84827379                           | NM_058212:1302         | Dpf3          | INSIDE                 | 0.222                                                        | 2.186                          | 3502.32            | 7657.51            | 0.486                          | 2189.41            | 1063.70            |
| A_68_P25776082 | chr8:35870564-35870608                            | NM_176933:-77          | Dusp4         | PROMOTER               | 0.222                                                        | 0.683                          | 2338.94            | 1597.35            | 0.151                          | 1536.62            | 232.66             |
| A_68_P22128830 | chr3:51080151-51080198                            | NM_023502:49735        | Ehf2          | INSIDE                 | 0.222                                                        | 0.707                          | 1359.74            | 961.45             | 0.157                          | 893.64             | 140.22             |
| A_68_P32219507 | chr19:59526323-59526367                           | NR_002863:6781         | Emx2os        | INSIDE                 | 0.222                                                        | 0.539                          | 1342.15            | 723.59             | 0.120                          | 1009.85            | 120.74             |
| A_68_P24175503 | chr5:148537797-148537841                          | NM_010228:-254         | Fit1          | PROMOTER               | 0.222                                                        | 0.456                          | 2386.15            | 1088.41            | 0.101                          | 1826.77            | 185.09             |
| A_68_P25531562 | chr7:139158754-139158798                          | NM_173410:634          | Gpr26         | INSIDE                 | 0.222                                                        | 0.404                          | 1661.87            | 671.82             | 0.090                          | 1302.92            | 117.10             |
| A_68_P28149601 | chr11:114626740-114626784                         | NM_001102615:60        | Kif19a        | INSIDE                 | 0.222                                                        | 0.615                          | 3182.32            | 1958.20            | 0.137                          | 2326.78            | 318.00             |
| A_68_P32016038 | chr19:23209873-23209917                           | NM_010638:-5821        | Klf9          | PROMOTER               | 0.222                                                        | 0.618                          | 1116.76            | 690.02             | 0.137                          | 856.02             | 117.19             |
| A_68_P24946854 | chr7:3644206-3644250                              | NM_029934:899          | Mboat7        | INSIDE                 | 0.222                                                        | 0.523                          | 2317.38            | 1211.72            | 0.116                          | 1868.31            | 216.60             |
| A_68_P30567336 | chr16:15863446-15863492                           | NM_029354:-53          | Mzt2          | PROMOTER               | 0.222                                                        | 0.549                          | 1337.26            | 734.18             | 0.122                          | 990.04             | 120.68             |
| A_68_P25031675 | chr7:31250465-31250509                            | NR_004443:124          | Nphs1as       | INSIDE                 | 0.222                                                        | 0.708                          | 2299.80            | 1628.55            | 0.157                          | 1832.80            | 287.65             |
| A_68_P25375584 | chr7:108967279-108967328                          | NM_008887:477          | Phox2a        | INSIDE                 | 0.222                                                        | 3.232                          | 2387.91            | 7718.57            | 0.718                          | 1716.21            | 1232.01            |
| A_68_P29841642 | chr14:99498547-99498591                           | NM_029454:-83          | Pibf1         | PROMOTER               | 0.222                                                        | 0.601                          | 1780.94            | 1070.43            | 0.133                          | 1437.93            | 191.69             |
| A_68_P32238975 | chrX:7151016-7151060                              | NM_138605:208          | Ppp1r3f       | INSIDE                 | 0.222                                                        | 2.207                          | 5680.18            | 12533.80           | 0.491                          | 2241.81            | 1100.11            |
| A_68_P23433031 | chr4:154008979-154009030                          | NM_001177995:1978      | Prdm16        | INSIDE                 | 0.222                                                        | 0.463                          | 1534.85            | 710.42             | 0.103                          | 1160.07            | 119.40             |
| A_68_P21417952 | chr2:90419722-90419766                            | NM_008982:1060         | Ptpnj         | INSIDE                 | 0.222                                                        | 0.464                          | 1393.67            | 646.07             | 0.103                          | 1167.97            | 120.06             |
| A_68_P22730294 | chr4:11486345-11486389                            | NM_001039556:248       | Rad54b        | INSIDE                 | 0.222                                                        | 0.604                          | 2029.09            | 1225.36            | 0.134                          | 1473.31            | 197.23             |
| A_68_P20149057 | chr1:36615326-36615370                            | NM_001126047:-122      | Sema4c        | PROMOTER               | 0.222                                                        | 0.600                          | 1039.55            | 624.11             | 0.133                          | 895.19             | 119.36             |
| A_68_P32427553 | chrX:61530261-61530305                            | NM_178740:-111         | Slitrk4       | PROMOTER               | 0.222                                                        | 2.360                          | 6864.58            | 16201.24           | 0.523                          | 2553.62            | 1336.04            |
| A_68_P21081137 | chr2:26772296-26772346                            | NM_013677:-270         | Surf1         | PROMOTER               | 0.222                                                        | 0.469                          | 1525.77            | 716.25             | 0.104                          | 1092.17            | 113.86             |
| A_68_P25957479 | chr8:74082789-74082840                            | NM_001100462:-44       | Tmem221       | PROMOTER               | 0.222                                                        | 0.678                          | 1055.74            | 715.89             | 0.150                          | 820.15             | 123.37             |
| A_68_P23429475 | chr4:153535140-153535184                          | NM_026388:-369         | Tprgl         | DIVERGENT_PROMOTER     | 0.222                                                        | 0.693                          | 3013.74            | 2088.44            | 0.154                          | 2198.31            | 338.44             |
| A_68_P26247724 | chr8:127316847-127316891                          | NM_198632:-50          | Trim67        | PROMOTER               | 0.222                                                        | 0.629                          | 2976.08            | 1871.69            | 0.140                          | 2437.95            | 340.98             |
| A_68_P28155496 | chr11:115676513-115676557                         | NM_029557:482          | Tsen54        | INSIDE                 | 0.222                                                        | 0.409                          | 1575.38            | 644.19             | 0.091                          | 1320.59            | 120.08             |
| A_68_P22372358 | chr3:100773375-100773419                          | NM_001013026:190       | Tuf2          | INSIDE                 | 0.222                                                        | 0.456                          | 1603.65            | 731.80             | 0.101                          | 1212.38            | 122.64             |
| A_68_P25108145 | chr7:56044314-56044358                            | NM_028031:-36          | Zdhhc13       | PROMOTER               | 0.222                                                        | 0.662                          | 2869.26            | 1900.27            | 0.147                          | 2287.55            | 336.69             |
| A_68_P27902560 | chr11:70577738-70577782                           | NM_177565:-188         | Zfp3          | PROMOTER               | 0.222                                                        | 0.618                          | 2629.42            | 1625.00            | 0.137                          | 1961.89            | 268.95             |
| A_68_P25008231 | chr7:25862140-25862187                            | NM_001168506:-60       | Zfp574        | DIVERGENT_PROMOTER     | 0.222                                                        | 0.680                          | 1118.80            | 760.76             | 0.151                          | 820.12             | 123.60             |
| A_68_P20530742 | chr1:114313443-114313487                          |                        | Unknown       |                        | 0.222                                                        | 0.492                          | 2444.72            | 1203.45            | 0.110                          | 1809.50            | 198.19             |
| A_68_P22717330 | chr4:8838562-8838606                              |                        | Unknown       |                        | 0.222                                                        | 0.519                          | 3686.74            | 1913.30            | 0.115                          | 2999.59            | 346.21             |
| A_68_P28183969 | chr11:120210906-120210950                         | NR_038126:937          | 0610009L18Rik | INSIDE                 | 0.221                                                        | 0.653                          | 1539.12            | 1004.95            | 0.145                          | 1088.27            | 157.27             |
| A_68_P21105254 | chr2:30650269-30650313                            | NM_198000:6937         | 1700001O22Rik | DOWNSTREAM             | 0.221                                                        | 0.462                          | 1621.13            | 748.23             | 0.102                          | 1197.51            | 122.03             |
| A_68_P28612794 | chr12:88232860-88232910                           | NM_145836:-7120        | 6430527G18Rik | PROMOTER               | 0.221                                                        | 0.481                          | 4579.19            | 2202.59            | 0.106                          | 3103.89            | 330.53             |
| A_68_P26595474 | chr9:66683005-66683049                            | NM_026674:-513         | Aph1c         | PROMOTER               | 0.221                                                        | 0.571                          | 2018.53            | 1153.26            | 0.126                          | 1774.12            | 223.63             |
| A_68_P25810709 | chr8:42460188-42460232                            | NM_019734:-159         | Asah1         | PROMOTER               | 0.221                                                        | 0.564                          | 2228.79            | 1257.40            | 0.124                          | 1636.78            | 203.73             |
| A_68_P20872964 | chr1:181889645-181889689                          | NM_001033285:-1553     | Cdc42bpa      | PROMOTER               | 0.221                                                        | 0.579                          | 1329.05            | 769.35             | 0.128                          | 1181.58            | 151.12             |
| A_68_P2855792  | chr12:77866643-77866687                           | NM_206534:105          | Churc1        | INSIDE                 | 0.221                                                        | 0.540                          | 1305.10            | 705.30             | 0.119                          | 1024.00            | 122.33             |
| A_68_P26586898 | chr9:65142471-65142515                            | NM_001044389:391       | Clpx          | INSIDE                 | 0.221                                                        | 0.483                          | 1308.51            | 632.29             | 0.107                          | 1136.13            | 121.45             |
| A_68_P28581229 | chr12:82585711-82585766                           | NM_025461:359          | Cox16         | INSIDE                 | 0.221                                                        | 0.487                          | 1436.61            | 699.30             | 0.107                          | 1130.79            | 121.39             |
| A_68_P31065263 | chr17:15513198-15513242                           | NM_007865:-433         | Dll1          | PROMOTER               | 0.221                                                        | 0.505                          | 1418.02            | 716.55             | 0.112                          | 1091.38            | 121.76             |
| A_68_P22903299 | chr4:49072794-49072838                            | NM_178756:483          | E130309F12Rik | INSIDE                 | 0.221                                                        | 0.469                          | 1377.16            | 646.06             | 0.104                          | 1128.47            | 116.80             |
| A_68_P21767285 | chr2:155555051-155555095                          | NM_145537:139          | Edem2         | INSIDE                 | 0.221                                                        | 0.422                          | 1513.77            | 638.13             | 0.093                          | 1302.04            | 121.37             |
| A_68_P31933631 | chr19:6276479-6276524                             | NM_010119:-394         | Ehd1          | PROMOTER               | 0.221                                                        | 0.476                          | 1612.19            | 767.36             | 0.105                          | 1143.85            | 120.40             |
| A_68_P20562764 | chr1:122500570-122500618                          | NM_010133:1531         | En1           | INSIDE                 | 0.221                                                        | 0.507                          | 1330.92            | 674.70             | 0.112                          | 1069.33            | 120.02             |
| A_68_P30651586 | chr16:32246480-32246526                           | NM_173439:609          | Fbxo45        | INSIDE                 | 0.221                                                        | 0.664                          | 938.83             | 623.10             | 0.147                          | 791.97             | 116.26             |

| ProbeName      | Target position of probe on CpG island microarray | TargetID          | GeneSymbol    | CpG island Description | Ratio of relative methylation (TiO <sub>2</sub> -NP/Vehicle) | Sham group                     |                    |                    | TiO <sub>2</sub> -H group      |                    |                    |
|----------------|---------------------------------------------------|-------------------|---------------|------------------------|--------------------------------------------------------------|--------------------------------|--------------------|--------------------|--------------------------------|--------------------|--------------------|
|                |                                                   |                   |               |                        |                                                              | Relative methylation (Cy5/Cy3) | Cy3 signal (Input) | Cy5 signal (MeDIP) | Relative methylation (Cy5/Cy3) | Cy3 signal (Input) | Cy5 signal (MeDIP) |
| A_68_P29631507 | chr14:58695104-58695149                           | NM_013518:3604    | Fgf9          | INSIDE                 | 0.221                                                        | 0.553                          | 1110.80            | 614.03             | 0.122                          | 940.82             | 114.94             |
| A_68_P25362945 | chr7:106775610-106775654                          | NM_001195529:-19  | Gm4980        | PROMOTER               | 0.221                                                        | 0.596                          | 1216.15            | 725.10             | 0.132                          | 903.27             | 119.17             |
| A_68_P23417749 | chr4:151661314-151661358                          | NM_008237:4435    | Hes3          | INSIDE                 | 0.221                                                        | 0.659                          | 1411.08            | 929.33             | 0.145                          | 1140.56            | 165.80             |
| A_68_P26228504 | chr8:124254834-124254878                          | NM_020605:398     | Jph3          | INSIDE                 | 0.221                                                        | 0.624                          | 5034.56            | 3142.71            | 0.138                          | 3573.54            | 492.61             |
| A_68_P21665425 | chr2:136717109-136717162                          | NM_001141946:7    | Mkks          | INSIDE                 | 0.221                                                        | 0.647                          | 1087.20            | 703.64             | 0.143                          | 819.68             | 117.01             |
| A_68_P23536417 | chr5:22940364-22940408                            | NM_026984:140     | Mll5          | INSIDE                 | 0.221                                                        | 0.425                          | 3661.06            | 1556.77            | 0.094                          | 2883.92            | 270.88             |
| A_68_P29348446 | chr13:115608303-115608349                         | NM_001113374:-118 | Mocs2         | PROMOTER               | 0.221                                                        | 0.625                          | 1209.20            | 755.22             | 0.138                          | 874.37             | 120.87             |
| A_68_P26742491 | chr9:95459602-95459646                            | NM_198414:-611    | Paqr9         | PROMOTER               | 0.221                                                        | 0.494                          | 3459.56            | 1710.48            | 0.109                          | 2436.14            | 266.52             |
| A_68_P23523572 | chr5:20457823-20457867                            | NM_001080977:-204 | Rsb1l1        | PROMOTER               | 0.221                                                        | 0.564                          | 1162.73            | 655.66             | 0.124                          | 995.22             | 123.80             |
| A_68_P31682228 | chr18:47526263-47526314                           | NM_018744:2234    | Sema6a        | INSIDE                 | 0.221                                                        | 0.401                          | 1677.78            | 672.30             | 0.089                          | 1322.60            | 117.19             |
| A_68_P32796352 | chrX:160514293-160514337                          | NM_009173:-333    | Siah1b        | PROMOTER               | 0.221                                                        | 1.672                          | 1531.25            | 2560.23            | 0.369                          | 718.98             | 265.23             |
| A_68_P29729987 | chr14:76186477-76186521                           | NM_026232:346     | Slc25a30      | INSIDE                 | 0.221                                                        | 0.461                          | 2324.93            | 1071.35            | 0.102                          | 1708.26            | 174.13             |
| A_68_P25094689 | chr7:52973005-52973055                            | NM_020011:-2453   | Sphk2         | PROMOTER               | 0.221                                                        | 0.394                          | 1649.80            | 650.58             | 0.087                          | 1387.81            | 120.90             |
| A_68_P29570219 | chr14:45970863-45970907                           | NM_019637:24      | Styx          | INSIDE                 | 0.221                                                        | 0.507                          | 3184.68            | 1614.61            | 0.112                          | 2349.79            | 263.33             |
| A_68_P27985638 | chr11:85657554-85657604                           | NM_009324:11462   | Tbx2          | DOWNSTREAM             | 0.221                                                        | 0.635                          | 2955.37            | 1878.11            | 0.141                          | 2099.88            | 295.11             |
| A_68_P27693363 | chr11:33103831-33103878                           | NM_019916:-266    | Tlx3          | PROMOTER               | 0.221                                                        | 0.453                          | 1492.55            | 676.80             | 0.100                          | 1176.29            | 117.83             |
| A_68_P29428727 | chr14:17197508-17197553                           | NM_009409:-189    | Top2b         | PROMOTER               | 0.221                                                        | 0.554                          | 1431.70            | 792.82             | 0.123                          | 1177.86            | 144.42             |
| A_68_P31962499 | chr19:12870892-12870947                           | NR_024093:-306    | U05342        | DIVERGENT_PROMOTER     | 0.221                                                        | 0.665                          | 1256.85            | 835.66             | 0.147                          | 878.84             | 129.33             |
| A_68_P32257888 | chrX:11242196-11242240                            |                   | Unknown       |                        | 0.221                                                        | 1.506                          | 892.23             | 1343.34            | 0.332                          | 417.66             | 138.86             |
| A_68_P30142411 | chr15:37065165-37065209                           |                   | Unknown       |                        | 0.221                                                        | 0.605                          | 1668.75            | 1009.26            | 0.134                          | 1246.12            | 166.87             |
| A_68_P25952418 | chr8:73047097-73047144                            | NM_029366:-41     | 2810422J05Rik | DIVERGENT_PROMOTER     | 0.220                                                        | 0.459                          | 1642.77            | 754.01             | 0.101                          | 1173.97            | 118.38             |
| A_68_P24624507 | chr6:88792017-88792061                            | NM_030251:-109    | Abtb1         | PROMOTER               | 0.220                                                        | 1.629                          | 9945.62            | 16204.31           | 0.358                          | 6894.62            | 2468.28            |
| A_68_P21862266 | chr2:171868455-171868499                          | NM_175631:490     | Cbln4         | INSIDE                 | 0.220                                                        | 0.476                          | 1245.34            | 593.24             | 0.105                          | 1123.41            | 117.97             |
| A_68_P20578314 | chr1:125942313-125942357                          | NM_199021:-198    | Dpp10         | PROMOTER               | 0.220                                                        | 0.698                          | 2018.23            | 1408.33            | 0.153                          | 1557.90            | 238.78             |
| A_68_P32128057 | chr19:43764144-43764188                           | NM_053103:-12     | Entpd7        | PROMOTER               | 0.220                                                        | 0.437                          | 1708.33            | 746.86             | 0.096                          | 1331.71            | 128.00             |
| A_68_P20012308 | chr1:6349244-6349288                              | NM_001195732:-145 | Fam150a       | PROMOTER               | 0.220                                                        | 0.552                          | 1876.32            | 1035.36            | 0.122                          | 1483.36            | 180.38             |
| A_68_P32127031 | chr19:43599236-43599283                           | NM_010324:-164    | Got1          | PROMOTER               | 0.220                                                        | 0.351                          | 2021.86            | 709.33             | 0.077                          | 1499.30            | 115.49             |
| A_68_P32141593 | chr19:46078116-46078160                           | NM_176785:171     | Hps6          | INSIDE                 | 0.220                                                        | 0.376                          | 1648.90            | 619.58             | 0.082                          | 1429.07            | 117.87             |
| A_68_P23312413 | chr4:132019816-132019860                          | NM_026039:-2      | Med18         | PROMOTER               | 0.220                                                        | 0.510                          | 1309.51            | 667.85             | 0.112                          | 1033.51            | 116.04             |
| A_68_P20877310 | chr1:182626954-182626998                          | NM_013729:189     | Mixl1         | INSIDE                 | 0.220                                                        | 0.511                          | 2298.80            | 1175.44            | 0.112                          | 1768.12            | 198.67             |
| A_68_P22039663 | chr3:32635419-32635463                            | NM_029017:237     | Mrp147        | INSIDE                 | 0.220                                                        | 0.602                          | 1443.47            | 868.54             | 0.132                          | 1078.72            | 142.90             |
| A_68_P32774623 | chrX:155853132-155853176                          | NM_001081124:645  | Mtap7d2       | INSIDE                 | 0.220                                                        | 1.352                          | 4018.89            | 5431.73            | 0.298                          | 1763.61            | 525.16             |
| A_68_P22310997 | chr3:87774900-87774944                            | NM_016701:-92     | Nes           | PROMOTER               | 0.220                                                        | 0.611                          | 1215.89            | 743.21             | 0.134                          | 933.88             | 125.51             |
| A_68_P27897808 | chr11:69715226-69715270                           | NM_001013414:-131 | Neur14        | DIVERGENT_PROMOTER     | 0.220                                                        | 0.490                          | 1412.54            | 692.69             | 0.108                          | 1118.73            | 120.59             |
| A_68_P20010816 | chr1:5907329-5907377                              | NM_010342:127     | Npbwr1        | INSIDE                 | 0.220                                                        | 0.567                          | 1229.17            | 697.00             | 0.124                          | 966.44             | 120.31             |
| A_68_P22752865 | chr4:15941230-15941274                            | NM_145950:-228    | Osgin2        | PROMOTER               | 0.220                                                        | 0.591                          | 1076.26            | 635.82             | 0.130                          | 910.26             | 118.49             |
| A_68_P21639372 | chr2:132078905-132078949                          | NM_011045:-10     | Pcna          | PROMOTER               | 0.220                                                        | 0.479                          | 1561.67            | 748.74             | 0.105                          | 1221.16            | 128.56             |
| A_68_P21073068 | chr2:25430283-25430334                            | NM_029293:83      | Phpt1         | INSIDE                 | 0.220                                                        | 0.705                          | 2050.79            | 1446.58            | 0.155                          | 1397.62            | 216.77             |
| A_68_P28055832 | chr11:98209796-98209843                           | NM_144828:-232    | Ppp1r1b       | PROMOTER               | 0.220                                                        | 1.502                          | 2044.06            | 3070.04            | 0.330                          | 1364.32            | 449.94             |
| A_68_P31158044 | chr17:35302111-35302155                           | NM_001199044:-310 | Prc2a         | PROMOTER               | 0.220                                                        | 0.658                          | 2606.73            | 1714.01            | 0.145                          | 1756.43            | 253.85             |
| A_68_P23393508 | chr4:147661631-147661675                          | NM_001083342:422  | Ptchd2        | INSIDE                 | 0.220                                                        | 0.525                          | 1671.57            | 877.18             | 0.116                          | 1087.12            | 125.78             |
| A_68_P28163122 | chr11:116976258-116976302                         | NR_029459:-205    | Sec14l1       | PROMOTER               | 0.220                                                        | 0.621                          | 2834.40            | 1759.68            | 0.136                          | 2013.85            | 274.88             |
| A_68_P31421207 | chr17:87507571-87507615                           | NM_019654:574     | Soes5         | INSIDE                 | 0.220                                                        | 0.603                          | 1102.86            | 664.52             | 0.133                          | 865.96             | 114.97             |
| A_68_P27995859 | chr11:87550663-87550719                           | NM_009296:-376    | Supt4h1       | PROMOTER               | 0.220                                                        | 0.549                          | 1312.14            | 719.86             | 0.120                          | 981.68             | 118.25             |
| A_68_P31752323 | chr18:60755666-60755710                           | NM_177340:28271   | Synpo         | INSIDE                 | 0.220                                                        | 0.694                          | 2519.68            | 1747.97            | 0.153                          | 2012.45            | 306.92             |
| A_68_P25465170 | chr7:126863806-126863854                          | NM_145585:449     | Thumpd1       | INSIDE                 | 0.220                                                        | 0.546                          | 1174.82            | 641.66             | 0.120                          | 972.79             | 116.95             |
| A_68_P21578169 | chr2:120802714-120802767                          | NM_175285:-57     | Tmem62        | DIVERGENT_PROMOTER     | 0.220                                                        | 0.468                          | 1291.18            | 604.77             | 0.103                          | 1148.64            | 118.44             |
| A_68_P28314942 | chr12:29436931-29436975                           | NM_201357:260     | Tssc1         | INSIDE                 | 0.220                                                        | 0.577                          | 1189.84            | 686.99             | 0.127                          | 895.52             | 113.69             |
| A_68_P26469621 | chr9:44607463-44607507                            | NM_138951:3550    | Ttc36         | INSIDE                 | 0.220                                                        | 0.554                          | 2445.69            | 1355.52            | 0.122                          | 1759.58            | 214.34             |
| A_68_P30651942 | chr16:32332504-32332548                           | NM_177633:189     | Ubxn7         | INSIDE                 | 0.220                                                        | 0.435                          | 1879.98            | 816.89             | 0.096                          | 1483.41            | 141.93             |
| A_68_P22774764 | chr4:21703668-21703712                            | NM_152825:274     | Usp45         | INSIDE                 | 0.220                                                        | 0.416                          | 1567.03            | 651.39             | 0.092                          | 1257.44            | 115.25             |

| ProbeName      | Target position of probe on CpG island microarray | TargetID                | GeneSymbol    | CpG island Description | Ratio of relative methylation (TiO <sub>2</sub> -NP/Vehicle) | Sham group                     |                    |                    | TiO <sub>2</sub> -H group      |                    |                    |
|----------------|---------------------------------------------------|-------------------------|---------------|------------------------|--------------------------------------------------------------|--------------------------------|--------------------|--------------------|--------------------------------|--------------------|--------------------|
|                |                                                   |                         |               |                        |                                                              | Relative methylation (Cy5/Cy3) | Cy3 signal (Input) | Cy5 signal (MeDIP) | Relative methylation (Cy5/Cy3) | Cy3 signal (Input) | Cy5 signal (MeDIP) |
| A_68_P31801894 | chr18:69357768-69357812                           | AK080553:16             |               | INSIDE                 | 0.220                                                        | 1.557                          | 1118.87            | 1742.24            | 0.343                          | 839.72             | 287.67             |
| A_68_P23699553 | chr5:53658148-53658198                            | NM_001145433:-172       | 1810013D10Rik | PROMOTER               | 0.219                                                        | 0.673                          | 1273.30            | 857.06             | 0.147                          | 1110.20            | 163.35             |
| A_68_P29050148 | chr13:54676323-54676367                           | NM_019968:-29           | Arl10         | DIVERGENT_PROMOTER     | 0.219                                                        | 0.331                          | 2013.17            | 665.54             | 0.072                          | 1613.11            | 116.60             |
| A_68_P23971892 | chr5:108863393-108863437                          | NM_007507:-17           | Atp5k         | PROMOTER               | 0.219                                                        | 0.542                          | 1340.39            | 726.27             | 0.119                          | 982.53             | 116.49             |
| A_68_P29480509 | chr14:26746634-26746678                           | NM_025311:80            | D14Ert449e    | INSIDE                 | 0.219                                                        | 0.513                          | 3717.51            | 1907.51            | 0.112                          | 2996.38            | 336.38             |
| A_68_P32121689 | chr19:42593058-42593107                           | NM_177464:-212          | D19Ert4386e   | PROMOTER               | 0.219                                                        | 0.463                          | 1829.26            | 847.56             | 0.101                          | 1380.23            | 139.96             |
| A_68_P26543334 | chr9:57556210-57556266                            | NM_153799:-137          | Edc3          | PROMOTER               | 0.219                                                        | 0.668                          | 1038.76            | 694.08             | 0.146                          | 788.01             | 115.20             |
| A_68_P29061785 | chr13:56623742-56623786                           | NM_178674:-104          | Fbxl21        | PROMOTER               | 0.219                                                        | 0.471                          | 5436.07            | 2558.92            | 0.103                          | 4378.98            | 451.91             |
| A_68_P26171001 | chr8:114464407-114464460                          | NM_026693:-184          | Gabarapl2     | DIVERGENT_PROMOTER     | 0.219                                                        | 0.643                          | 984.49             | 632.93             | 0.141                          | 828.49             | 116.56             |
| A_68_P23968445 | chr5:108154656-108154700                          | NM_010278:-1315         | Gfi1          | PROMOTER               | 0.219                                                        | 0.620                          | 1078.97            | 668.62             | 0.136                          | 848.09             | 115.35             |
| A_68_P20945388 | chr1:194597149-194597193                          | NM_144881:243           | Hhat          | INSIDE                 | 0.219                                                        | 0.555                          | 1192.89            | 661.67             | 0.122                          | 1010.54            | 122.83             |
| A_68_P29247521 | chr13:97440411-97440457                           | NM_008255:457           | Hmgcr         | INSIDE                 | 0.219                                                        | 0.510                          | 1283.20            | 654.55             | 0.112                          | 1052.96            | 117.56             |
| A_68_P24119630 | chr5:136611720-136611770                          | NM_027891:200           | Lrwd1         | INSIDE                 | 0.219                                                        | 0.670                          | 2503.87            | 1678.03            | 0.147                          | 1750.50            | 256.69             |
| A_68_P32742984 | chrX:147247606-147247650                          | NM_001199246:618        | Maged2        | INSIDE                 | 0.219                                                        | 2.249                          | 3314.50            | 7454.73            | 0.492                          | 1228.13            | 604.81             |
| A_68_P31130218 | chr17:29989237-29989281                           | NM_001081160:35569      | Mdga1         | INSIDE                 | 0.219                                                        | 1.358                          | 2278.29            | 3093.88            | 0.297                          | 1689.65            | 501.92             |
| A_68_P21345540 | chr2:75542919-75542963                            | NM_010902:-242          | Nfe2l2        | PROMOTER               | 0.219                                                        | 1.443                          | 9326.85            | 13462.96           | 0.317                          | 5986.99            | 1895.76            |
| A_68_P29702205 | chr14:70977218-70977273                           | NM_153136:-408          | Nudt18        | PROMOTER               | 0.219                                                        | 0.494                          | 1447.28            | 714.31             | 0.108                          | 1079.99            | 116.63             |
| A_68_P26460519 | chr9:43047271-43047315                            | NM_178644:607           | Oaf           | INSIDE                 | 0.219                                                        | 0.536                          | 1851.00            | 991.97             | 0.118                          | 1439.47            | 169.19             |
| A_68_P21110358 | chr2:31492494-31492545                            | NM_001123362:-3037      | Prdm12        | PROMOTER               | 0.219                                                        | 0.655                          | 1499.15            | 981.63             | 0.143                          | 1196.84            | 171.26             |
| A_68_P29007689 | chr13:46513571-46513615                           | NM_001081425:-76        | Rbm24         | PROMOTER               | 0.219                                                        | 0.535                          | 1288.04            | 689.07             | 0.117                          | 1001.11            | 117.15             |
| A_68_P26017900 | chr8:86590423-86590471                            | NM_009055:-288          | Rfx1          | PROMOTER               | 0.219                                                        | 0.467                          | 1542.89            | 720.55             | 0.102                          | 1141.34            | 116.58             |
| A_68_P26926728 | chr10:8606159-8606207                             | NM_175155:-314          | Sash1         | PROMOTER               | 0.219                                                        | 0.538                          | 1448.43            | 778.96             | 0.118                          | 1026.36            | 121.00             |
| A_68_P29645527 | chr14:61253344-61253393                           | NM_001033272:-197       | Spata13       | PROMOTER               | 0.219                                                        | 1.637                          | 789.50             | 1292.71            | 0.358                          | 597.57             | 214.18             |
| A_68_P25510944 | chr7:135603768-135603821                          | NM_009383:1233          | Tial1         | INSIDE                 | 0.219                                                        | 0.551                          | 1134.54            | 625.30             | 0.120                          | 977.11             | 117.70             |
| A_68_P31465566 | chr18:4920932-4920979                             | ENSMUST00000143254:-768 |               | PROMOTER               | 0.219                                                        | 0.634                          | 1092.37            | 693.08             | 0.139                          | 836.16             | 116.34             |
| A_68_P23186773 | chr4:106511533-106511577                          | ENSMUST00000151369:8971 |               | DOWNSTREAM             | 0.219                                                        | 0.645                          | 1593.54            | 1027.15            | 0.141                          | 1159.51            | 163.84             |
| A_68_P21754949 | chr2:153269590-153269634                          | NM_001001986:603        | 8430427H17Rik | INSIDE                 | 0.218                                                        | 0.518                          | 3142.39            | 1629.16            | 0.113                          | 2335.58            | 264.12             |
| A_68_P32364048 | chrX:45696786-45696830                            | NM_178782:2274          | Bcor1l        | INSIDE                 | 0.218                                                        | 1.818                          | 2008.87            | 3651.17            | 0.397                          | 794.03             | 315.28             |
| A_68_P26313776 | chr9:13631112-13631156                            | NR_037622:363           | Cep57         | INSIDE                 | 0.218                                                        | 0.455                          | 1704.09            | 774.90             | 0.099                          | 1190.57            | 118.27             |
| A_68_P24091083 | chr5:130363235-130363294                          | NM_024166:76            | Chchd2        | INSIDE                 | 0.218                                                        | 0.527                          | 1457.36            | 767.87             | 0.115                          | 1093.40            | 125.35             |
| A_68_P28175184 | chr11:118860828-118860872                         | NM_001030291:11349      | Enpp7         | DOWNSTREAM             | 0.218                                                        | 0.673                          | 1798.49            | 1209.95            | 0.147                          | 1236.34            | 181.69             |
| A_68_P23323333 | chr4:134090414-134090464                          | NM_029759:-1771         | Fam54b        | PROMOTER               | 0.218                                                        | 0.419                          | 1983.79            | 832.15             | 0.092                          | 1316.62            | 120.50             |
| A_68_P27845563 | chr11:60744900-60744958                           | NR_027800:441           | Gm16516       | INSIDE                 | 0.218                                                        | 0.557                          | 1399.94            | 779.86             | 0.121                          | 958.84             | 116.18             |
| A_68_P29296002 | chr13:106234796-106234840                         | NM_008308:1046          | Htr1a         | INSIDE                 | 0.218                                                        | 0.643                          | 948.61             | 609.97             | 0.140                          | 855.18             | 119.97             |
| A_68_P24427997 | chr6:48504680-48504727                            | NM_001110160:-94        | Lrrc61        | PROMOTER               | 0.218                                                        | 0.455                          | 1528.41            | 695.21             | 0.099                          | 1205.06            | 119.72             |
| A_68_P30499098 | chr15:102502893-102502944                         | NR_030460:621           | Mir688        | PROMOTER               | 0.218                                                        | 0.642                          | 2372.14            | 1523.12            | 0.140                          | 1712.84            | 239.71             |
| A_68_P26542420 | chr9:57400417-57400461                            | NM_025837:121           | Mpi           | INSIDE                 | 0.218                                                        | 0.632                          | 1306.03            | 824.99             | 0.138                          | 889.75             | 122.52             |
| A_68_P20412903 | chr1:88479253-88479300                            | NM_008801:-200          | Pde6d         | DIVERGENT_PROMOTER     | 0.218                                                        | 0.585                          | 1102.76            | 644.58             | 0.127                          | 917.18             | 116.84             |
| A_68_P24123992 | chr5:137463167-137463211                          | NM_011962:300           | Plod3         | INSIDE                 | 0.218                                                        | 0.530                          | 1554.59            | 824.02             | 0.115                          | 1028.86            | 118.78             |
| A_68_P31252243 | chr17:55851934-55851978                           | NM_028370:-30           | Pot1b         | PROMOTER               | 0.218                                                        | 0.671                          | 919.36             | 616.51             | 0.146                          | 846.60             | 123.75             |
| A_68_P23433035 | chr4:154009415-154009459                          | NM_001177995:1546       | Prdm16        | INSIDE                 | 0.218                                                        | 0.516                          | 1439.28            | 742.62             | 0.112                          | 1070.32            | 120.25             |
| A_68_P27027630 | chr10:27794848-27794893                           | NM_008983:245           | Ptpkr         | INSIDE                 | 0.218                                                        | 0.474                          | 1775.42            | 841.13             | 0.103                          | 1262.62            | 130.46             |
| A_68_P21395229 | chr2:84728472-84728517                            | NM_199223:-1645         | Rtn4rl2       | PROMOTER               | 0.218                                                        | 0.511                          | 1371.91            | 700.70             | 0.111                          | 1068.19            | 118.67             |
| A_68_P20427307 | chr1:90967569-90967615                            | NM_133816:556           | Sh3bp4        | INSIDE                 | 0.218                                                        | 0.556                          | 2192.39            | 1219.94            | 0.121                          | 1649.27            | 199.62             |
| A_68_P29033147 | chr13:51663043-51663087                           | NM_009167:-611          | Shc3          | PROMOTER               | 0.218                                                        | 0.502                          | 1396.09            | 701.39             | 0.109                          | 1078.14            | 117.96             |
| A_68_P21081132 | chr2:26771837-26771881                            | NM_013678:-82           | Surf2         | PROMOTER               | 0.218                                                        | 0.581                          | 1757.38            | 1021.63            | 0.127                          | 1228.82            | 155.81             |
| A_68_P26082618 | chr8:97844602-97844646                            | NM_028532:9112          | Tepp          | INSIDE                 | 0.218                                                        | 0.488                          | 1408.76            | 687.38             | 0.106                          | 1097.57            | 116.57             |
| A_68_P26023335 | chr8:87561478-87561522                            | NM_001122843:434        | Tnp02         | INSIDE                 | 0.218                                                        | 2.482                          | 6585.83            | 16344.37           | 0.540                          | 4234.41            | 2286.58            |
| A_68_P24319967 | chr6:28347629-28347673                            | ENSMUST0000035930:355   |               | INSIDE                 | 0.218                                                        | 0.477                          | 1398.99            | 667.09             | 0.104                          | 1125.26            | 116.82             |
| A_68_P28091093 | chr11:104304028-104304074                         | NM_001081045:-445       | 1700081L11Rik | PROMOTER               | 0.217                                                        | 0.441                          | 1552.06            | 684.41             | 0.096                          | 1209.75            | 115.88             |
| A_68_P23296723 | chr4:129138984-129139028                          | NM_133889:84            | Bsdcl         | INSIDE                 | 0.217                                                        | 1.938                          | 4850.53            | 9399.00            | 0.420                          | 3306.54            | 1388.52            |



| ProbeName      | Target position of probe on CpG island microarray | TargetID                | GeneSymbol    | CpG island Description | Ratio of relative methylation (TiO <sub>2</sub> -NP/Vehicle) | Sham group                     |                    |                    | TiO <sub>2</sub> -H group      |                    |                    |
|----------------|---------------------------------------------------|-------------------------|---------------|------------------------|--------------------------------------------------------------|--------------------------------|--------------------|--------------------|--------------------------------|--------------------|--------------------|
|                |                                                   |                         |               |                        |                                                              | Relative methylation (Cy5/Cy3) | Cy3 signal (Input) | Cy5 signal (MeDIP) | Relative methylation (Cy5/Cy3) | Cy3 signal (Input) | Cy5 signal (MeDIP) |
| A_68_P27266461 | chr10:76628282-76628326                           | NM_009929:971           | Col18a1       | INSIDE                 | 0.217                                                        | 0.628                          | 2195.41            | 1377.63            | 0.136                          | 1733.46            | 235.82             |
| A_68_P31101000 | chr17:25151186-25151230                           | NM_020608:967           | Cramp11       | INSIDE                 | 0.217                                                        | 0.571                          | 8431.38            | 4816.82            | 0.124                          | 5935.64            | 736.09             |
| A_68_P27535081 | chr10:126727643-126727687                         | NM_007837:-184          | Ddit3         | DIVERGENT_PROMOTER     | 0.217                                                        | 0.702                          | 2155.36            | 1513.65            | 0.152                          | 1507.48            | 229.87             |
| A_68_P30478224 | chr15:98928096-98928143                           | NM_176835:-1795         | Dnajc22       | DIVERGENT_PROMOTER     | 0.217                                                        | 2.356                          | 920.59             | 2169.23            | 0.510                          | 625.86             | 319.42             |
| A_68_P29702478 | chr14:71018216-71018260                           | NM_013514:11723         | Epb4.9        | INSIDE                 | 0.217                                                        | 0.546                          | 1416.88            | 774.30             | 0.118                          | 1084.92            | 128.50             |
| A_68_P24994093 | chr7:20158292-20158342                            | NM_027189:376           | Gemin7        | INSIDE                 | 0.217                                                        | 0.433                          | 1744.46            | 755.51             | 0.094                          | 1311.11            | 123.25             |
| A_68_P21133753 | chr2:35317703-35317754                            | NM_001145821:-783       | Ggta1         | PROMOTER               | 0.217                                                        | 0.610                          | 1035.25            | 631.88             | 0.133                          | 870.24             | 115.39             |
| A_68_P21874764 | chr2:174156135-174156179                          | NM_001077510:567        | Gnas          | INSIDE                 | 0.217                                                        | 0.691                          | 2930.84            | 2026.36            | 0.150                          | 2257.92            | 339.15             |
| A_68_P20962883 | chr2:3429988-3430032                              | NM_015765:76            | Hspa14        | INSIDE                 | 0.217                                                        | 0.456                          | 1304.03            | 594.09             | 0.099                          | 1207.04            | 119.60             |
| A_68_P24538443 | chr6:71781629-71781673                            | NM_029673:326           | Immt          | INSIDE                 | 0.217                                                        | 0.595                          | 1774.79            | 1056.80            | 0.129                          | 1573.85            | 203.49             |
| A_68_P31074422 | chr17:17761131-17761175                           | NM_172827:301           | Lnpep         | INSIDE                 | 0.217                                                        | 0.675                          | 3437.73            | 2320.19            | 0.147                          | 2441.17            | 357.67             |
| A_68_P31112801 | chr17:26987616-26987660                           | NM_008700:-9128         | Nkx2-5        | PROMOTER               | 0.217                                                        | 0.583                          | 1235.25            | 719.91             | 0.126                          | 966.81             | 122.03             |
| A_68_P21112482 | chr2:31830089-31830133                            | NM_172268:141           | Nup214        | INSIDE                 | 0.217                                                        | 0.462                          | 1430.40            | 660.43             | 0.100                          | 1205.86            | 120.66             |
| A_68_P24172758 | chr5:148081815-148081859                          | NM_008814:130           | Pdx1          | INSIDE                 | 0.217                                                        | 0.637                          | 2676.54            | 1705.06            | 0.138                          | 1822.81            | 251.55             |
| A_68_P26951868 | chr10:13272953-13272998                           | NM_001164195:-27        | Pex3          | PROMOTER               | 0.217                                                        | 0.613                          | 1178.92            | 723.07             | 0.133                          | 901.64             | 119.76             |
| A_68_P24123988 | chr5:137462758-137462802                          | NM_011962:-108          | Plod3         | PROMOTER               | 0.217                                                        | 0.741                          | 3574.70            | 2648.17            | 0.161                          | 2601.49            | 418.05             |
| A_68_P22880642 | chr4:45031769-45031813                            | NM_022811:294           | Poir1e        | INSIDE                 | 0.217                                                        | 0.562                          | 1262.24            | 709.54             | 0.122                          | 958.42             | 116.91             |
| A_68_P24008582 | chr5:115688344-115688391                          | NM_026398:2508          | Pop5          | INSIDE                 | 0.217                                                        | 0.659                          | 1079.88            | 711.64             | 0.143                          | 833.10             | 118.98             |
| A_68_P20138943 | chr1:34516740-34516784                            | NM_011206:172           | Ptpn18        | INSIDE                 | 0.217                                                        | 0.471                          | 3441.33            | 1619.67            | 0.102                          | 2469.09            | 252.00             |
| A_68_P26630337 | chr9:72772909-72772953                            | NM_028116:-526          | Pygo1         | PROMOTER               | 0.217                                                        | 0.746                          | 4817.15            | 3595.57            | 0.162                          | 3665.08            | 593.01             |
| A_68_P22405706 | chr3:107135381-107135431                          | NM_001045807:801        | Rbm15         | INSIDE                 | 0.217                                                        | 0.465                          | 1542.54            | 716.97             | 0.101                          | 1153.45            | 116.49             |
| A_68_P27278806 | chr10:79229855-79229899                           | NR_027505:-190          | Rnf126        | PROMOTER               | 0.217                                                        | 0.677                          | 3395.37            | 2299.16            | 0.147                          | 2693.21            | 396.10             |
| A_68_P24089364 | chr5:130007431-130007475                          | NM_172276:347           | Sfswap        | INSIDE                 | 0.217                                                        | 0.422                          | 1659.11            | 700.53             | 0.091                          | 1319.24            | 120.65             |
| A_68_P27807567 | chr11:53793320-53793364                           | NM_019723:187           | Sle22a21      | INSIDE                 | 0.217                                                        | 0.558                          | 1200.61            | 669.52             | 0.121                          | 1023.84            | 123.87             |
| A_68_P23439556 | chr4:154976380-154976427                          | NM_177186:879           | Sle35e2       | INSIDE                 | 0.217                                                        | 0.497                          | 1428.41            | 710.37             | 0.108                          | 1090.57            | 117.81             |
| A_68_P26578199 | chr9:63605284-63605328                            | NM_016769:495           | Smad3         | INSIDE                 | 0.217                                                        | 0.487                          | 1865.39            | 909.37             | 0.106                          | 1437.25            | 151.98             |
| A_68_P21626534 | chr2:129626071-129626115                          | NM_001038635:-160       | Stk35         | PROMOTER               | 0.217                                                        | 0.676                          | 1252.10            | 846.38             | 0.146                          | 905.72             | 132.61             |
| A_68_P23891540 | chr5:92391970-92392018                            | NR_028429:87            | Thap6         | INSIDE                 | 0.217                                                        | 0.598                          | 1218.87            | 728.40             | 0.130                          | 950.96             | 123.28             |
| A_68_P22319099 | chr3:89196394-89196438                            | NM_009565:709           | Zbtb7b        | INSIDE                 | 0.217                                                        | 0.461                          | 1592.61            | 734.56             | 0.100                          | 1281.94            | 128.06             |
| A_68_P30351004 | chr15:76709899-76709943                           | NM_145916:215           | Zfp7          | INSIDE                 | 0.217                                                        | 0.596                          | 1210.58            | 721.99             | 0.130                          | 900.39             | 116.73             |
| A_68_P28680481 | chr12:101425433-101425477                         | ENSMUST00000146364:-723 |               | PROMOTER               | 0.217                                                        | 0.663                          | 2268.07            | 1503.49            | 0.144                          | 1587.82            | 228.01             |
| A_68_P31918873 | chr19:3708527-3708572                             | NM_028077:217           | 1810055G02Rik | INSIDE                 | 0.216                                                        | 0.664                          | 9223.46            | 6124.10            | 0.144                          | 6444.52            | 925.99             |
| A_68_P21665424 | chr2:136717006-136717053                          | NM_028201:76            | 2210009G21Rik | INSIDE                 | 0.216                                                        | 0.475                          | 1486.99            | 705.78             | 0.103                          | 1146.17            | 117.69             |
| A_68_P24641805 | chr6:91828146-91828192                            | NM_172730:122           | C130022K22Rik | INSIDE                 | 0.216                                                        | 0.569                          | 1374.82            | 781.83             | 0.123                          | 998.05             | 122.84             |
| A_68_P27702675 | chr11:34646901-34646945                           | NM_027411:221           | Ccdc99        | INSIDE                 | 0.216                                                        | 0.342                          | 1771.09            | 606.24             | 0.074                          | 1558.20            | 114.97             |
| A_68_P29957981 | chr14:122196637-122196681                         | NM_134074:298           | Doek9         | INSIDE                 | 0.216                                                        | 0.504                          | 2447.64            | 1233.96            | 0.109                          | 1897.75            | 206.32             |
| A_68_P25528905 | chr7:138686558-138686602                          | NM_008257:104           | Hmx3          | INSIDE                 | 0.216                                                        | 0.356                          | 2359.46            | 839.52             | 0.077                          | 1880.21            | 144.42             |
| A_68_P21339173 | chr2:74570711-74570762                            | NM_010468:20687         | Hoxd3         | INSIDE                 | 0.216                                                        | 0.642                          | 1038.19            | 666.11             | 0.139                          | 849.83             | 117.73             |
| A_68_P20351509 | chr1:74997858-74997902                            | NM_010544:345           | Ihh           | INSIDE                 | 0.216                                                        | 0.535                          | 4688.95            | 2509.03            | 0.115                          | 3681.84            | 425.12             |
| A_68_P21428210 | chr2:92229536-92229580                            | NM_001202445:3282       | Mapk8ip1      | INSIDE                 | 0.216                                                        | 0.541                          | 1363.25            | 737.44             | 0.117                          | 1008.86            | 117.90             |
| A_68_P20394350 | chr1:82721424-82721468                            | NM_029409:-46           | Mif           | PROMOTER               | 0.216                                                        | 0.666                          | 1563.58            | 1041.16            | 0.144                          | 1171.41            | 168.60             |
| A_68_P26991374 | chr10:20878723-20878777                           | NM_001198914:2040       | Myb           | INSIDE                 | 0.216                                                        | 0.623                          | 1126.09            | 702.08             | 0.134                          | 896.91             | 120.53             |
| A_68_P20224252 | chr1:51972666-51972710                            | NM_001161817:130        | Myo1b         | INSIDE                 | 0.216                                                        | 0.425                          | 3979.41            | 1689.63            | 0.092                          | 3162.87            | 289.48             |
| A_68_P31943410 | chr19:8831910-8831954                             | NM_016813:340           | Nxf1          | INSIDE                 | 0.216                                                        | 0.419                          | 1761.24            | 738.39             | 0.091                          | 1322.43            | 119.97             |
| A_68_P21490982 | chr2:104657364-104657415                          | NM_001123327:-536       | Qser1         | PROMOTER               | 0.216                                                        | 0.577                          | 1357.06            | 782.79             | 0.124                          | 942.23             | 117.13             |
| A_68_P30351089 | chr15:76734484-76734528                           | NM_012053:6             | Rpl8          | INSIDE                 | 0.216                                                        | 2.013                          | 4053.37            | 8160.62            | 0.434                          | 2534.05            | 1100.09            |
| A_68_P22207872 | chr3:66782957-66783001                            | NM_013665:2715          | Shox2         | INSIDE                 | 0.216                                                        | 0.639                          | 1015.17            | 648.97             | 0.138                          | 890.26             | 122.84             |
| A_68_P26998900 | chr10:22365258-22365302                           | NM_178934:464           | Sle2a12       | INSIDE                 | 0.216                                                        | 0.713                          | 3308.36            | 2358.11            | 0.154                          | 2497.69            | 384.56             |
| A_68_P25091293 | chr7:52383927-52383971                            | NR_000002:-1115         | Snord32a      | PROMOTER               | 0.216                                                        | 0.496                          | 2853.82            | 1416.27            | 0.107                          | 2008.95            | 215.02             |
| A_68_P21081016 | chr2:26758519-26758565                            | NM_009298:-209          | Surf6         | PROMOTER               | 0.216                                                        | 0.444                          | 1587.69            | 705.71             | 0.096                          | 1208.72            | 115.86             |
| A_68_P30374041 | chr15:80542355-80542399                           | NM_144812:634           | Tnrc6b        | INSIDE                 | 0.216                                                        | 0.675                          | 2383.47            | 1608.99            | 0.146                          | 1698.77            | 247.47             |

| ProbeName      | Target position of probe on CpG island microarray | TargetID                | GeneSymbol    | CpG island Description | Ratio of relative methylation (TiO <sub>2</sub> -NP/Vehicle) | Sham group                     |                    |                    | TiO <sub>2</sub> -H group      |                    |                    |
|----------------|---------------------------------------------------|-------------------------|---------------|------------------------|--------------------------------------------------------------|--------------------------------|--------------------|--------------------|--------------------------------|--------------------|--------------------|
|                |                                                   |                         |               |                        |                                                              | Relative methylation (Cy5/Cy3) | Cy3 signal (Input) | Cy5 signal (MeDIP) | Relative methylation (Cy5/Cy3) | Cy3 signal (Input) | Cy5 signal (MeDIP) |
| A_68_P21433080 | chr2:93028458-93028502                            | NM_001025246:740        | Trp53i11      | INSIDE                 | 0.216                                                        | 0.666                          | 1377.28            | 917.76             | 0.144                          | 1043.00            | 149.90             |
| A_68_P29473058 | chr14:25598908-25598952                           |                         |               | Unknown                | 0.216                                                        | 0.603                          | 1367.18            | 824.35             | 0.130                          | 927.42             | 120.68             |
| A_68_P27291139 | chr10:81167549-81167593                           | BC064812:1              |               | INSIDE                 | 0.216                                                        | 0.534                          | 3162.18            | 1687.25            | 0.115                          | 2542.55            | 293.39             |
| A_68_P29050102 | chr13:54666387-54666431                           | NM_133797:335           | 4833439L19Rik | INSIDE                 | 0.215                                                        | 0.664                          | 3256.05            | 2160.82            | 0.143                          | 2139.99            | 305.26             |
| A_68_P30587615 | chr16:20426603-20426647                           | NM_013790:-157          | Abcc5         | PROMOTER               | 0.215                                                        | 0.631                          | 1192.94            | 752.32             | 0.136                          | 911.87             | 123.67             |
| A_68_P26078867 | chr8:97190919-97190966                            | NM_024269:-63           | Arl2bp        | PROMOTER               | 0.215                                                        | 0.562                          | 2225.49            | 1250.55            | 0.121                          | 1533.88            | 185.36             |
| A_68_P20898010 | chr1:186706559-186706603                          | NM_178692:335           | C130074G19Rik | INSIDE                 | 0.215                                                        | 0.629                          | 1120.27            | 705.20             | 0.135                          | 946.14             | 128.04             |
| A_68_P24818072 | chr6:124946958-124947002                          | NM_001145927:-1474      | C530028O21Rik | PROMOTER               | 0.215                                                        | 0.679                          | 5799.59            | 3935.88            | 0.146                          | 4114.28            | 599.34             |
| A_68_P20551458 | chr1:120286341-120286385                          | NM_001081276:728        | Clasp1        | INSIDE                 | 0.215                                                        | 0.601                          | 1367.14            | 821.79             | 0.129                          | 1065.48            | 137.92             |
| A_68_P31259431 | chr17:57129908-57129952                           | NM_017393:244           | Clpp          | INSIDE                 | 0.215                                                        | 0.600                          | 1560.12            | 935.58             | 0.129                          | 1124.24            | 144.91             |
| A_68_P23401325 | chr4:148960914-148960958                          | NM_023051:190           | Clstn1        | INSIDE                 | 0.215                                                        | 0.624                          | 4047.49            | 2524.53            | 0.134                          | 3361.42            | 450.60             |
| A_68_P32121140 | chr19:42505908-42505952                           | NM_145123:343           | Crtac1        | INSIDE                 | 0.215                                                        | 0.612                          | 2052.70            | 1256.73            | 0.131                          | 1546.30            | 203.26             |
| A_68_P27287961 | chr10:80645653-80645705                           | NM_001190474:-73        | Dapk3         | PROMOTER               | 0.215                                                        | 0.593                          | 1201.87            | 712.63             | 0.127                          | 965.21             | 122.92             |
| A_68_P21629724 | chr2:130250001-130250045                          | NM_178762:2             | Fam113a       | INSIDE                 | 0.215                                                        | 0.452                          | 1530.22            | 692.37             | 0.097                          | 1217.98            | 118.45             |
| A_68_P25549532 | chr7:142129376-142129420                          | NM_001143802:715        | Fam196a       | INSIDE                 | 0.215                                                        | 0.438                          | 1618.87            | 708.29             | 0.094                          | 1238.96            | 116.41             |
| A_68_P31260715 | chr17:57387144-57387195                           | NM_030084:-105          | Gpr108        | DIVERGENT_PROMOTER     | 0.215                                                        | 0.558                          | 1245.72            | 695.29             | 0.120                          | 974.77             | 117.10             |
| A_68_P23333862 | chr4:135980297-135980341                          | NM_008309:880           | Htr1d         | INSIDE                 | 0.215                                                        | 0.525                          | 2722.47            | 1430.04            | 0.113                          | 2013.17            | 227.22             |
| A_68_P28041932 | chr11:95868837-95868881                           | NM_009951:-1600         | Igf2bp1       | PROMOTER               | 0.215                                                        | 0.678                          | 3053.63            | 2071.81            | 0.146                          | 2236.41            | 326.97             |
| A_68_P24325220 | chr6:29161862-29161906                            | NM_011829:387           | Impdh1        | INSIDE                 | 0.215                                                        | 0.573                          | 1491.16            | 854.85             | 0.123                          | 969.70             | 119.71             |
| A_68_P27927256 | chr11:75444673-75444717                           | NM_008916:173           | Inpp5k        | INSIDE                 | 0.215                                                        | 0.604                          | 2194.17            | 1324.53            | 0.130                          | 1601.96            | 207.50             |
| A_68_P23297039 | chr4:129191585-129191629                          | NM_010807:782           | Marcks11      | INSIDE                 | 0.215                                                        | 0.451                          | 2018.76            | 909.69             | 0.097                          | 1618.42            | 156.86             |
| A_68_P27924617 | chr11:74985774-74985818                           | NR_029794:-1093         | Mir212        | DIVERGENT_PROMOTER     | 0.215                                                        | 0.495                          | 2420.60            | 1198.01            | 0.106                          | 1753.87            | 186.61             |
| A_68_P25578888 | chr7:146767137-146767194                          | NR_027875:1531          | Nkx6-2        | INSIDE                 | 0.215                                                        | 1.487                          | 770.38             | 1145.54            | 0.320                          | 626.56             | 200.61             |
| A_68_P27796178 | chr11:51669754-51669800                           | NM_199299:1207          | Phf15         | INSIDE                 | 0.215                                                        | 1.880                          | 904.15             | 1700.07            | 0.404                          | 548.44             | 221.76             |
| A_68_P21820163 | chr2:164683274-164683318                          | NM_011125:-88           | Pltp          | PROMOTER               | 0.215                                                        | 0.543                          | 2459.64            | 1334.68            | 0.117                          | 1895.58            | 221.18             |
| A_68_P28197876 | chr12:3960172-3960216                             | NM_008895:5244          | Pomc          | INSIDE                 | 0.215                                                        | 0.617                          | 1693.45            | 1044.97            | 0.132                          | 1304.22            | 172.63             |
| A_68_P21909033 | chr2:180922121-180922165                          | NM_025598:95            | Ppdpf         | INSIDE                 | 0.215                                                        | 0.683                          | 2411.20            | 1648.05            | 0.147                          | 1744.28            | 256.12             |
| A_68_P23230433 | chr4:116358143-116358188                          | NM_011034:-38           | Prdx1         | PROMOTER               | 0.215                                                        | 0.514                          | 1789.23            | 919.01             | 0.110                          | 1275.88            | 140.81             |
| A_68_P32054982 | chr19:29887617-29887661                           | NM_177721:-174          | Ranbp6        | PROMOTER               | 0.215                                                        | 0.635                          | 1252.81            | 794.95             | 0.136                          | 978.17             | 133.14             |
| A_68_P25091294 | chr7:52384091-52384135                            | NM_009438:-7            | Rpl13a        | PROMOTER               | 0.215                                                        | 0.508                          | 1412.29            | 716.96             | 0.109                          | 1088.05            | 118.93             |
| A_68_P23768841 | chr5:67998640-67998694                            | NM_001033415:-455       | Shisa3        | PROMOTER               | 0.215                                                        | 0.548                          | 1358.69            | 745.24             | 0.118                          | 1042.23            | 123.18             |
| A_68_P25023456 | chr7:29551693-29551750                            | NM_001122765:-49        | Sirt2         | DIVERGENT_PROMOTER     | 0.215                                                        | 0.529                          | 1418.61            | 750.93             | 0.114                          | 1041.82            | 118.62             |
| A_68_P24134127 | chr5:139676250-139676294                          | NM_024451:-351          | Sun1          | PROMOTER               | 0.215                                                        | 0.545                          | 3313.35            | 1806.29            | 0.117                          | 2218.98            | 259.55             |
| A_68_P25502831 | chr7:134028530-134028574                          | NM_001163774:-71        | Taok2         | PROMOTER               | 0.215                                                        | 0.532                          | 1210.85            | 643.63             | 0.114                          | 1093.88            | 124.80             |
| A_68_P28974207 | chr13:40829034-40829090                           | NM_001122948:-3250      | Tcfap2a       | PROMOTER               | 0.215                                                        | 0.599                          | 1215.48            | 727.99             | 0.129                          | 918.48             | 118.31             |
| A_68_P24431873 | chr6:49213588-49213632                            | NM_198102:441           | Tra2a         | INSIDE                 | 0.215                                                        | 0.626                          | 2953.52            | 1847.72            | 0.134                          | 2091.01            | 280.83             |
| A_68_P29982442 | chr15:5135931-5135975                             | NM_026213:393           | Ttc33         | INSIDE                 | 0.215                                                        | 0.512                          | 2213.53            | 1132.96            | 0.110                          | 1641.21            | 180.60             |
| A_68_P29056625 | chr13:55816369-55816420                           | NM_175150:384           | Txndc15       | INSIDE                 | 0.215                                                        | 0.578                          | 1333.07            | 770.55             | 0.124                          | 943.04             | 117.21             |
| A_68_P26345605 | chr9:20935853-20935897                            | NM_001205312:-155       | Tyk2          | PROMOTER               | 0.215                                                        | 0.430                          | 1723.99            | 740.76             | 0.092                          | 1306.52            | 120.43             |
| A_68_P31092406 | chr17:23701243-23701288                           | NM_001033496:-72        | Zfp213        | PROMOTER               | 0.215                                                        | 0.467                          | 1510.69            | 705.92             | 0.100                          | 1222.53            | 122.54             |
| A_68_P29961931 | chr14:122873762-122873806                         | NM_009574:-821          | Zie2          | DIVERGENT_PROMOTER     | 0.215                                                        | 0.639                          | 1897.42            | 1212.25            | 0.137                          | 1310.39            | 179.67             |
| A_68_P24329524 | chr6:29935157-29935209                            | ENSMUST00000124522:-146 |               | PROMOTER               | 0.215                                                        | 1.545                          | 1914.40            | 2958.60            | 0.332                          | 1385.72            | 459.46             |
| A_68_P30413825 | chr15:87375567-87375611                           | ENSMUST00000169110:685  |               | INSIDE                 | 0.215                                                        | 0.395                          | 2089.00            | 824.78             | 0.085                          | 1382.39            | 117.45             |
| A_68_P23424431 | chr4:152748069-152748119                          | NM_001099299:108845     | Ajap1         | INSIDE                 | 0.214                                                        | 2.353                          | 842.68             | 1982.91            | 0.504                          | 619.09             | 311.99             |
| A_68_P26818139 | chr9:108976760-108976804                          | NM_172774:-144          | Atrip         | PROMOTER               | 0.214                                                        | 0.492                          | 1577.61            | 775.75             | 0.105                          | 1148.62            | 120.80             |
| A_68_P20827006 | chr1:173200478-173200522                          | NM_020579:42            | B4galt3       | INSIDE                 | 0.214                                                        | 0.567                          | 1207.57            | 684.57             | 0.122                          | 980.32             | 119.18             |
| A_68_P32139026 | chr19:45616482-45616535                           | NM_001037758:178285     | Btrc          | DOWNSTREAM             | 0.214                                                        | 0.665                          | 1005.56            | 668.88             | 0.142                          | 866.88             | 123.16             |
| A_68_P20887292 | chr1:184447385-184447429                          | NM_009794:208           | Capn2         | INSIDE                 | 0.214                                                        | 0.529                          | 1722.29            | 911.49             | 0.113                          | 1424.86            | 161.52             |
| A_68_P25313622 | chr7:97591232-97591276                            | NM_145151:-36           | Crebzf        | PROMOTER               | 0.214                                                        | 0.476                          | 1463.37            | 697.12             | 0.102                          | 1187.97            | 121.08             |
| A_68_P30356903 | chr15:77800770-77800814                           | NM_018749:462           | Eif3d         | INSIDE                 | 0.214                                                        | 0.401                          | 1814.73            | 726.86             | 0.086                          | 1402.05            | 120.45             |
| A_68_P26531721 | chr9:55359505-55359549                            | NM_145615:524           | Etfa          | INSIDE                 | 0.214                                                        | 0.669                          | 924.00             | 618.42             | 0.144                          | 808.91             | 116.11             |

| ProbeName      | Target position of probe on CpG island microarray | TargetID                 | GeneSymbol    | CpG island Description | Ratio of relative methylation (TiO <sub>2</sub> -NP/Vehicle) | Sham group                     |                    |                    | TiO <sub>2</sub> -H group      |                    |                    |
|----------------|---------------------------------------------------|--------------------------|---------------|------------------------|--------------------------------------------------------------|--------------------------------|--------------------|--------------------|--------------------------------|--------------------|--------------------|
|                |                                                   |                          |               |                        |                                                              | Relative methylation (Cy5/Cy3) | Cy3 signal (Input) | Cy5 signal (MeDIP) | Relative methylation (Cy5/Cy3) | Cy3 signal (Input) | Cy5 signal (MeDIP) |
| A_68_P25273842 | chr7:88907926-88907970                            | NM_025997:110            | Fam103a1      | INSIDE                 | 0.214                                                        | 0.506                          | 1396.06            | 705.75             | 0.108                          | 1135.26            | 122.96             |
| A_68_P28080441 | chr11:102467523-102467567                         | NM_020510:1800           | Fzd2          | INSIDE                 | 0.214                                                        | 0.443                          | 1719.82            | 762.55             | 0.095                          | 1281.40            | 121.74             |
| A_68_P21147620 | chr2:38204034-38204078                            | NM_010710:-2771          | Lhx2          | PROMOTER               | 0.214                                                        | 0.698                          | 1219.42            | 850.76             | 0.149                          | 904.37             | 134.90             |
| A_68_P24639527 | chr6:91466074-91466119                            | NM_026309:68             | Lsm3          | INSIDE                 | 0.214                                                        | 0.481                          | 1591.63            | 765.80             | 0.103                          | 1182.52            | 121.51             |
| A_68_P32539363 | chrX:91786834-91786878                            | NM_019791:557            | Maged1        | INSIDE                 | 0.214                                                        | 1.969                          | 2039.95            | 4016.39            | 0.422                          | 861.74             | 363.89             |
| A_68_P22793477 | chr4:26273660-26273704                            | NM_172865:117            | Manea         | INSIDE                 | 0.214                                                        | 0.522                          | 2042.56            | 1066.96            | 0.112                          | 1569.08            | 175.51             |
| A_68_P31930244 | chr19:5696279-5696323                             | NM_022012:7170           | Map3k11       | INSIDE                 | 0.214                                                        | 0.664                          | 1221.58            | 811.28             | 0.142                          | 884.26             | 125.39             |
| A_68_P27535216 | chr10:126748924-126748968                         | NM_001003913:-104        | Mars          | PROMOTER               | 0.214                                                        | 0.513                          | 1570.58            | 806.44             | 0.110                          | 1103.63            | 121.01             |
| A_68_P28556954 | chr12:78063431-78063475                           | NM_001146176:-217        | Max           | PROMOTER               | 0.214                                                        | 0.552                          | 1344.60            | 742.55             | 0.118                          | 1011.22            | 119.36             |
| A_68_P23394433 | chr4:147822470-147822515                          | NM_020009:-198           | Mtor          | DIVERGENT_PROMOTER     | 0.214                                                        | 0.631                          | 1215.94            | 767.22             | 0.135                          | 861.85             | 116.54             |
| A_68_P27184376 | chr10:61596437-61596481                           | NM_009719:621            | Neurog3       | INSIDE                 | 0.214                                                        | 0.611                          | 4051.69            | 2475.51            | 0.131                          | 2544.56            | 332.73             |
| A_68_P21740960 | chr2:150612370-150612414                          | NM_153781:-139           | Pygb          | PROMOTER               | 0.214                                                        | 0.551                          | 1328.47            | 731.88             | 0.118                          | 995.95             | 117.64             |
| A_68_P32672688 | chrX:131120583-131120633                          | NM_019865:416            | Rpl36a        | INSIDE                 | 0.214                                                        | 1.483                          | 1086.35            | 1610.71            | 0.317                          | 406.96             | 128.91             |
| A_68_P29879718 | chr14:106296554-106296598                         | NM_011897:-540           | Spry2         | PROMOTER               | 0.214                                                        | 0.522                          | 1234.23            | 643.73             | 0.111                          | 1053.87            | 117.43             |
| A_68_P30546421 | chr16:11134214-11134258                           | NM_029582:389            | Txndc11       | INSIDE                 | 0.214                                                        | 0.540                          | 1251.05            | 675.46             | 0.116                          | 1053.64            | 121.97             |
| A_68_P31620975 | chr18:36092956-36093005                           |                          | Unknown       |                        | 0.214                                                        | 0.546                          | 1390.76            | 759.12             | 0.117                          | 1021.83            | 119.28             |
| A_68_P27095871 | chr10:42333813-42333861                           | ENSMUST00000144806:30193 |               | INSIDE                 | 0.214                                                        | 1.679                          | 726.43             | 1219.37            | 0.360                          | 492.51             | 177.25             |
| A_68_P27992495 | chr11:86900155-86900199                           | NM_024262:103            | 1200011M11Rik | INSIDE                 | 0.213                                                        | 0.674                          | 1512.21            | 1018.51            | 0.143                          | 1136.18            | 162.92             |
| A_68_P28607941 | chr12:87423506-87423550                           | NM_001199843:18          | 1700019E19Rik | INSIDE                 | 0.213                                                        | 0.647                          | 1038.30            | 672.16             | 0.138                          | 855.70             | 118.19             |
| A_68_P23189064 | chr4:106850847-106850891                          | NM_025617:103            | 2210012G02Rik | INSIDE                 | 0.213                                                        | 0.526                          | 2225.36            | 1170.43            | 0.112                          | 1595.14            | 178.77             |
| A_68_P21487320 | chr2:103963515-103963559                          | NM_026634:611            | A930018P22Rik | INSIDE                 | 0.213                                                        | 0.547                          | 1711.64            | 936.35             | 0.116                          | 1350.53            | 157.27             |
| A_68_P31144953 | chr17:32457424-32457468                           | NM_019774:652            | Akap8         | INSIDE                 | 0.213                                                        | 0.556                          | 1507.99            | 838.82             | 0.118                          | 1145.46            | 135.54             |
| A_68_P23237065 | chr4:117559612-117559656                          | NM_033617:300            | Atp6v0b       | INSIDE                 | 0.213                                                        | 0.361                          | 1985.78            | 716.44             | 0.077                          | 1563.17            | 120.25             |
| A_68_P31921523 | chr19:4169744-4169788                             | NM_134148:5713           | Carns1        | INSIDE                 | 0.213                                                        | 0.718                          | 2056.57            | 1476.48            | 0.153                          | 1352.51            | 206.71             |
| A_68_P31126793 | chr17:29375333-29375377                           | NM_153166:-619           | Cpne5         | PROMOTER               | 0.213                                                        | 0.657                          | 4373.03            | 2873.01            | 0.140                          | 3311.27            | 463.04             |
| A_68_P25504836 | chr7:134404187-134404231                          | NM_023203:-27            | Dctpp1        | PROMOTER               | 0.213                                                        | 0.634                          | 1960.28            | 1242.27            | 0.135                          | 1478.54            | 199.20             |
| A_68_P32117991 | chr19:42007492-42007537                           | NM_001164561:290         | Exocse1       | INSIDE                 | 0.213                                                        | 0.591                          | 3443.25            | 2036.05            | 0.126                          | 2579.87            | 324.38             |
| A_68_P31162043 | chr17:36117444-36117488                           | NM_008136:567            | Gnl1          | INSIDE                 | 0.213                                                        | 0.639                          | 2631.89            | 1682.19            | 0.136                          | 1877.78            | 255.71             |
| A_68_P28266912 | chr12:16807246-16807296                           | NM_015764:422            | Greb1         | INSIDE                 | 0.213                                                        | 0.662                          | 1020.75            | 676.17             | 0.141                          | 843.42             | 119.20             |
| A_68_P32454250 | chrX:68809345-68809389                            | NM_008253:199            | Hmgb3         | INSIDE                 | 0.213                                                        | 1.632                          | 1137.69            | 1856.64            | 0.348                          | 554.51             | 193.12             |
| A_68_P20391709 | chr1:82286790-82286834                            | NM_010570:1202           | Irs1          | INSIDE                 | 0.213                                                        | 0.607                          | 1052.84            | 638.66             | 0.129                          | 882.24             | 114.25             |
| A_68_P26016964 | chr8:86423687-86423732                            | NM_181039:-287           | Lphn1         | PROMOTER               | 0.213                                                        | 0.567                          | 3680.21            | 2085.07            | 0.121                          | 2727.19            | 329.79             |
| A_68_P23955793 | chr5:105948778-105948822                          | NM_133897:311            | Lrre8c        | INSIDE                 | 0.213                                                        | 0.481                          | 1484.06            | 714.32             | 0.103                          | 1271.43            | 130.44             |
| A_68_P30356226 | chr15:77672472-77672516                           | NM_022410:51             | Myh9          | INSIDE                 | 0.213                                                        | 0.556                          | 1149.55            | 638.58             | 0.118                          | 1012.00            | 119.81             |
| A_68_P27542070 | chr10:128002461-128002505                         | NM_011119:508            | Pa2g4         | INSIDE                 | 0.213                                                        | 0.622                          | 1273.81            | 792.64             | 0.133                          | 907.46             | 120.41             |
| A_68_P28145837 | chr11:113927724-113927772                         | NM_172800:-483           | Sdk2          | PROMOTER               | 0.213                                                        | 0.457                          | 1717.83            | 785.36             | 0.097                          | 1261.79            | 122.97             |
| A_68_P27167591 | chr10:58684147-58684191                           | NM_001024910:427         | Septin10      | INSIDE                 | 0.213                                                        | 0.481                          | 1967.67            | 946.89             | 0.102                          | 1442.77            | 147.74             |
| A_68_P29033148 | chr13:51663167-51663218                           | NM_009167:-739           | Shc3          | PROMOTER               | 0.213                                                        | 0.559                          | 1402.04            | 784.25             | 0.119                          | 985.98             | 117.27             |
| A_68_P20723689 | chr1:154750745-154750789                          | NM_001005507:-990        | Smg7          | PROMOTER               | 0.213                                                        | 0.560                          | 1196.19            | 669.59             | 0.119                          | 1019.43            | 121.35             |
| A_68_P31958008 | chr19:11892927-11892972                           | NM_011502:434            | Stx3          | INSIDE                 | 0.213                                                        | 0.548                          | 1367.45            | 749.55             | 0.117                          | 1038.29            | 121.12             |
| A_68_P31092955 | chr17:23810698-23810747                           | NM_001008425:15          | Thoc6         | INSIDE                 | 0.213                                                        | 0.505                          | 1823.42            | 921.40             | 0.108                          | 1354.68            | 145.90             |
| A_68_P27981396 | chr11:84953706-84953750                           | NM_001029934:-271        | Usp32         | PROMOTER               | 0.213                                                        | 0.477                          | 1455.31            | 694.32             | 0.102                          | 1174.14            | 119.28             |
| A_68_P30572235 | chr16:17147510-17147562                           | NM_026940:477            | Ydjc          | INSIDE                 | 0.213                                                        | 0.470                          | 1873.92            | 880.30             | 0.100                          | 1217.96            | 121.97             |
| A_68_P25183344 | chr7:72672119-72672163                            |                          | Unknown       |                        | 0.213                                                        | 0.686                          | 2290.43            | 1570.94            | 0.146                          | 1821.55            | 265.88             |
| A_68_P31753363 | chr18:60908551-60908595                           | ENSMUST00000066785:-268  |               | PROMOTER               | 0.213                                                        | 0.356                          | 2170.57            | 772.65             | 0.076                          | 1784.29            | 135.44             |
| A_68_P28155137 | chr11:115626646-115626697                         | NM_028014:-75            | 2310067B10Rik | PROMOTER               | 0.212                                                        | 0.619                          | 3676.80            | 2274.87            | 0.131                          | 2447.94            | 321.31             |
| A_68_P31921206 | chr19:4121378-4121422                             | NM_016666:4427           | Aip           | INSIDE                 | 0.212                                                        | 0.356                          | 2112.87            | 751.28             | 0.075                          | 1614.89            | 121.80             |
| A_68_P27281231 | chr10:79604257-79604301                           | NM_025313:-781           | Atp5d         | DIVERGENT_PROMOTER     | 0.212                                                        | 0.398                          | 2124.86            | 845.47             | 0.084                          | 1462.53            | 123.55             |
| A_68_P32262593 | chrX:12164837-12164881                            | NM_027439:-26            | Atp6ap2       | PROMOTER               | 0.212                                                        | 1.548                          | 1788.61            | 2768.02            | 0.328                          | 654.60             | 214.96             |
| A_68_P27278359 | chr10:79167367-79167411                           | NM_001077184:286         | Bsg           | INSIDE                 | 0.212                                                        | 0.438                          | 1665.67            | 728.83             | 0.093                          | 1262.70            | 117.39             |
| A_68_P30588528 | chr16:20620501-20620545                           | NM_028420:829            | Camk2n2       | INSIDE                 | 0.212                                                        | 2.275                          | 5785.35            | 13159.28           | 0.483                          | 3595.98            | 1735.95            |

| ProbeName      | Target position of probe on CpG island microarray | TargetID           | GeneSymbol | CpG island Description | Ratio of relative methylation (TiO <sub>2</sub> -NP/Vehicle) | Sham group                     |                    |                    | TiO <sub>2</sub> -H group      |                    |                    |
|----------------|---------------------------------------------------|--------------------|------------|------------------------|--------------------------------------------------------------|--------------------------------|--------------------|--------------------|--------------------------------|--------------------|--------------------|
|                |                                                   |                    |            |                        |                                                              | Relative methylation (Cy5/Cy3) | Cy3 signal (Input) | Cy5 signal (MeDIP) | Relative methylation (Cy5/Cy3) | Cy3 signal (Input) | Cy5 signal (MeDIP) |
| A_68_P30247880 | chr15:58247520-58247564                           | NM_145959:520      | D15Erd621e | INSIDE                 | 0.212                                                        | 0.584                          | 1212.14            | 707.47             | 0.124                          | 937.07             | 116.08             |
| A_68_P27281213 | chr10:79601565-79601609                           | NM_001195268:-1454 | Dos        | PROMOTER               | 0.212                                                        | 0.720                          | 2801.43            | 2016.59            | 0.152                          | 1810.65            | 275.80             |
| A_68_P21573667 | chr2:119980437-119980486                          | NM_133838:-150     | Ehd4       | PROMOTER               | 0.212                                                        | 0.650                          | 1219.61            | 792.90             | 0.138                          | 907.55             | 125.04             |
| A_68_P22128828 | chr3:51079948-51080002                            | NM_023502:49935    | E1f2       | INSIDE                 | 0.212                                                        | 0.543                          | 1349.36            | 732.60             | 0.115                          | 1059.90            | 121.80             |
| A_68_P21727910 | chr2:147871145-147871199                          | NM_010446:1533     | Foxa2      | INSIDE                 | 0.212                                                        | 0.488                          | 1554.78            | 758.55             | 0.104                          | 1116.50            | 115.72             |
| A_68_P28925105 | chr13:31899742-31899786                           | NM_008592:1250     | Foxc1      | INSIDE                 | 0.212                                                        | 0.352                          | 2137.96            | 753.60             | 0.075                          | 1619.39            | 121.05             |
| A_68_P32337350 | chrX:38754572-38754616                            | NM_016886:114      | Gria3      | INSIDE                 | 0.212                                                        | 10.544                         | 7878.95            | 83076.23           | 2.233                          | 3793.06            | 8470.29            |
| A_68_P21475553 | chr2:102026602-102026646                          | NM_178886:-90      | Ldlrad3    | PROMOTER               | 0.212                                                        | 0.633                          | 1564.80            | 990.89             | 0.134                          | 1390.68            | 186.51             |
| A_68_P31669146 | chr18:44972023-44972067                           | NM_001085373:-208  | Mec        | PROMOTER               | 0.212                                                        | 0.680                          | 1072.62            | 729.22             | 0.144                          | 950.32             | 136.99             |
| A_68_P28177556 | chr11:119251329-119251373                         | NR_035453:-435     | Mir1932    | PROMOTER               | 0.212                                                        | 0.618                          | 1251.20            | 773.13             | 0.131                          | 1163.40            | 152.46             |
| A_68_P23088441 | chr4:87677667-87677717                            | NM_027326:1619     | Mllt3      | INSIDE                 | 0.212                                                        | 0.534                          | 1325.92            | 708.62             | 0.113                          | 1058.65            | 120.07             |
| A_68_P26772694 | chr9:100979083-100979130                          | NM_001100451:656   | Msl2       | INSIDE                 | 0.212                                                        | 0.570                          | 1325.78            | 756.27             | 0.121                          | 1057.20            | 127.87             |
| A_68_P25360738 | chr7:106415893-106415949                          | NM_001048167:-36   | Mtap6      | PROMOTER               | 0.212                                                        | 0.709                          | 1944.04            | 1378.28            | 0.151                          | 1326.39            | 199.73             |
| A_68_P28004913 | chr11:89163892-89163940                           | NM_008711:-43      | Nog        | PROMOTER               | 0.212                                                        | 0.658                          | 1124.21            | 740.24             | 0.139                          | 882.21             | 122.93             |
| A_68_P22898162 | chr4:48057954-48057998                            | NM_015743:-6143    | Nr4a3      | PROMOTER               | 0.212                                                        | 0.645                          | 2007.57            | 1293.93            | 0.137                          | 1556.05            | 212.88             |
| A_68_P23261316 | chr4:122878552-122878598                          | NM_001085502:-221  | Nt5c1a     | PROMOTER               | 0.212                                                        | 0.667                          | 1290.84            | 860.65             | 0.141                          | 883.84             | 125.03             |
| A_68_P31117522 | chr17:27759599-27759649                           | NM_019837:773      | Nudt3      | INSIDE                 | 0.212                                                        | 0.571                          | 1376.47            | 786.56             | 0.121                          | 952.80             | 115.26             |
| A_68_P29589384 | chr14:49284797-49284844                           | NM_144841:-2273    | Otx2       | DIVERGENT_PROMOTER     | 0.212                                                        | 0.442                          | 1758.34            | 776.68             | 0.094                          | 1301.11            | 121.78             |
| A_68_P30463768 | chr15:96290631-96290675                           | NM_028148:622      | Scaf11     | INSIDE                 | 0.212                                                        | 0.646                          | 1225.33            | 792.11             | 0.137                          | 899.46             | 123.32             |
| A_68_P25585439 | chr7:148067707-148067751                          | NM_001127351:40    | Sirt3      | INSIDE                 | 0.212                                                        | 0.648                          | 4502.68            | 2916.34            | 0.137                          | 3126.92            | 429.10             |
| A_68_P27926647 | chr11:75344750-75344794                           | NM_001199284:-423  | Slc43a2    | PROMOTER               | 0.212                                                        | 0.614                          | 3844.62            | 2361.91            | 0.130                          | 2777.15            | 361.76             |
| A_68_P30132016 | chr15:35085389-35085433                           | NM_019635:151      | Stk3       | INSIDE                 | 0.212                                                        | 0.427                          | 2475.64            | 1056.78            | 0.091                          | 1865.54            | 168.98             |
| A_68_P25581339 | chr7:147130322-147130366                          | NM_009482:590      | Utf1       | INSIDE                 | 0.212                                                        | 0.737                          | 3285.27            | 2420.71            | 0.156                          | 2239.97            | 350.38             |
| A_68_P22413527 | chr3:108395008-108395052                          | NM_181400:835      | Wdr47      | INSIDE                 | 0.212                                                        | 0.674                          | 1234.98            | 832.66             | 0.143                          | 958.45             | 137.22             |
| A_68_P29493861 | chr14:29319923-29319970                           | NM_009524:1288     | Wnt5a      | INSIDE                 | 0.212                                                        | 0.649                          | 1142.28            | 740.90             | 0.138                          | 884.44             | 121.88             |
| A_68_P27873629 | chr11:65620598-65620642                           | NM_026107:-125     | Zkscan6    | PROMOTER               | 0.212                                                        | 0.473                          | 1604.04            | 758.35             | 0.100                          | 1386.18            | 138.84             |
| A_68_P23276155 | chr4:125406755-125406803                          |                    |            | Unknown                | 0.212                                                        | 0.598                          | 1119.36            | 669.61             | 0.127                          | 917.61             | 116.46             |
| A_68_P28712204 | chr12:107201277-107201321                         | BC156654:163438    |            | INSIDE                 | 0.212                                                        | 0.671                          | 1583.27            | 1061.75            | 0.142                          | 1215.43            | 172.53             |
| A_68_P25032100 | chr7:31337206-31337250                            | NM_183321:63       | BC053749   | INSIDE                 | 0.211                                                        | 0.678                          | 1287.72            | 873.66             | 0.143                          | 968.38             | 138.38             |
| A_68_P21866705 | chr2:172765232-172765276                          | NM_007557:540      | Bmp7       | INSIDE                 | 0.211                                                        | 0.607                          | 1805.03            | 1094.84            | 0.128                          | 1376.69            | 175.80             |
| A_68_P31616442 | chr18:35278972-35279016                           | NM_009818:429      | Ctnna1     | INSIDE                 | 0.211                                                        | 0.530                          | 2167.37            | 1148.16            | 0.112                          | 1700.53            | 189.95             |
| A_68_P27010235 | chr10:24431971-24432016                           | NM_008813:-85      | Enpp1      | PROMOTER               | 0.211                                                        | 1.551                          | 4773.09            | 7404.26            | 0.328                          | 3283.83            | 1077.11            |
| A_68_P31105766 | chr17:25854648-25854692                           | NM_022422:554      | Gngl3      | INSIDE                 | 0.211                                                        | 0.607                          | 1896.77            | 1151.03            | 0.128                          | 1384.17            | 177.16             |
| A_68_P30349000 | chr15:76369261-76369305                           | NM_029643:-90      | Gpr172b    | DIVERGENT_PROMOTER     | 0.211                                                        | 0.610                          | 1310.06            | 798.80             | 0.128                          | 921.05             | 118.29             |
| A_68_P27894382 | chr11:69145803-69145849                           | NM_010599:6067     | Kenab3     | INSIDE                 | 0.211                                                        | 0.615                          | 1137.58            | 699.65             | 0.130                          | 919.99             | 119.25             |
| A_68_P20864285 | chr1:180457620-180457665                          | NM_001161665:-1613 | Kif26b     | PROMOTER               | 0.211                                                        | 0.685                          | 1043.38            | 714.81             | 0.145                          | 828.04             | 119.70             |
| A_68_P20739602 | chr1:157588540-157588584                          | NM_010712:595      | Lhx4       | INSIDE                 | 0.211                                                        | 0.559                          | 1290.80            | 721.36             | 0.118                          | 1000.12            | 118.05             |
| A_68_P26016963 | chr8:86423548-86423592                            | NM_181039:-426     | Lphn1      | PROMOTER               | 0.211                                                        | 1.819                          | 1385.72            | 2520.14            | 0.384                          | 862.35             | 330.90             |
| A_68_P23955160 | chr5:105845255-105845299                          | NM_001033550:483   | Lrre8b     | INSIDE                 | 0.211                                                        | 0.721                          | 3690.54            | 2661.87            | 0.152                          | 2789.03            | 423.94             |
| A_68_P31156878 | chr17:35119267-35119311                           | NM_001204273:214   | Lsm2       | INSIDE                 | 0.211                                                        | 0.426                          | 2163.90            | 921.01             | 0.090                          | 1727.66            | 155.21             |
| A_68_P20625164 | chr1:134921568-134921624                          | NM_008575:329      | Mdm4       | INSIDE                 | 0.211                                                        | 0.476                          | 1535.53            | 731.06             | 0.100                          | 1151.70            | 115.67             |
| A_68_P23547790 | chr5:25005052-25005096                            | NM_001081383:-473  | Mll3       | DIVERGENT_PROMOTER     | 0.211                                                        | 0.431                          | 1689.66            | 727.94             | 0.091                          | 1313.71            | 119.23             |
| A_68_P23760679 | chr5:66651534-66651578                            | NM_027602:193      | Nsun7      | INSIDE                 | 0.211                                                        | 2.423                          | 3500.23            | 8481.48            | 0.510                          | 2272.03            | 1159.24            |
| A_68_P25090923 | chr7:52309399-52309443                            | NM_022999:7602     | Prrg2      | INSIDE                 | 0.211                                                        | 0.414                          | 2016.49            | 834.08             | 0.087                          | 1331.76            | 116.05             |
| A_68_P31151620 | chr17:34169430-34169477                           | NM_001205215:159   | Rxbp1      | INSIDE                 | 0.211                                                        | 0.635                          | 1134.78            | 720.41             | 0.134                          | 909.88             | 121.64             |
| A_68_P21420761 | chr2:90955447-90955493                            | NM_011355:18517    | Sfp1       | INSIDE                 | 0.211                                                        | 0.616                          | 2220.61            | 1367.15            | 0.130                          | 1646.00            | 213.32             |
| A_68_P30720961 | chr16:44332811-44332855                           | NM_001159419:119   | Sid1       | INSIDE                 | 0.211                                                        | 0.514                          | 1403.51            | 721.28             | 0.108                          | 1057.45            | 114.47             |
| A_68_P28963696 | chr13:39052204-39052248                           | NM_001170430:180   | Slc35b3    | INSIDE                 | 0.211                                                        | 0.424                          | 2156.19            | 914.27             | 0.089                          | 1634.57            | 146.09             |
| A_68_P20285517 | chr1:63224065-63224115                            | NR_028558:-1506    | Snora41    | PROMOTER               | 0.211                                                        | 0.661                          | 1079.27            | 713.94             | 0.140                          | 870.30             | 121.74             |
| A_68_P21729944 | chr2:148221334-148221378                          | NM_009219:244      | Sstr4      | INSIDE                 | 0.211                                                        | 0.419                          | 1936.96            | 811.30             | 0.088                          | 1419.29            | 125.50             |
| A_68_P20833437 | chr1:174430507-174430560                          | NM_178598:157      | Tagln2     | INSIDE                 | 0.211                                                        | 0.632                          | 1185.26            | 748.97             | 0.133                          | 872.30             | 116.31             |

| ProbeName      | Target position of probe on CpG island microarray | TargetID                | GeneSymbol    | CpG island Description | Ratio of relative methylation (TiO <sub>2</sub> -NP/Vehicle) | Sham group                     |                    |                    | TiO <sub>2</sub> -H group      |                    |                    |
|----------------|---------------------------------------------------|-------------------------|---------------|------------------------|--------------------------------------------------------------|--------------------------------|--------------------|--------------------|--------------------------------|--------------------|--------------------|
|                |                                                   |                         |               |                        |                                                              | Relative methylation (Cy5/Cy3) | Cy3 signal (Input) | Cy5 signal (MeDIP) | Relative methylation (Cy5/Cy3) | Cy3 signal (Input) | Cy5 signal (MeDIP) |
| A_68_P24591244 | chr6:83019585-83019631                            | NM_009392:611           | Tlx2          | INSIDE                 | 0.211                                                        | 1.357                          | 2903.42            | 3939.31            | 0.287                          | 2041.11            | 585.21             |
| A_68_P28077838 | chr11:102017610-102017654                         | NM_029649:89            | Tmem101       | INSIDE                 | 0.211                                                        | 0.537                          | 1320.23            | 708.54             | 0.113                          | 1019.49            | 115.32             |
| A_68_P28740679 | chr12:112088312-112088356                         | NM_001199785:-154       | Zfp839        | DIVERGENT_PROMOTER     | 0.211                                                        | 0.522                          | 1567.46            | 818.57             | 0.110                          | 1114.40            | 122.80             |
| A_68_P24951608 | chr7:4971880-4971924                              | NM_001033383:-75        | Zfp865        | PROMOTER               | 0.211                                                        | 0.610                          | 1354.54            | 825.75             | 0.128                          | 1101.01            | 141.39             |
| A_68_P25352333 | chr7:104936712-104936764                          | ENSMUST00000172423:-312 |               | PROMOTER               | 0.211                                                        | 0.525                          | 1305.14            | 684.58             | 0.111                          | 1057.60            | 117.01             |
| A_68_P31162735 | chr17:36282108-36282152                           | NR_033517:168           | 2410017I17Rik | INSIDE                 | 0.210                                                        | 0.339                          | 2071.48            | 702.04             | 0.071                          | 1698.86            | 121.17             |
| A_68_P27554557 | chr11:3794614-3794660                             | NM_026150:493           | 4921536K21Rik | INSIDE                 | 0.210                                                        | 0.685                          | 1094.46            | 750.24             | 0.144                          | 853.87             | 122.70             |
| A_68_P24056045 | chr5:123958382-123958426                          | NM_198611:-2064         | B3gnt4        | PROMOTER               | 0.210                                                        | 0.724                          | 2214.58            | 1603.82            | 0.152                          | 1378.04            | 209.88             |
| A_68_P25093327 | chr7:52722315-52722359                            | NM_007527:-68           | Bax           | PROMOTER               | 0.210                                                        | 0.440                          | 1677.04            | 737.35             | 0.092                          | 1334.59            | 123.19             |
| A_68_P21075525 | chr2:25837701-25837745                            | NM_001115076:1080       | Camsap1       | INSIDE                 | 0.210                                                        | 0.619                          | 5224.55            | 3234.22            | 0.130                          | 3672.23            | 476.80             |
| A_68_P24164623 | chr5:145928226-145928276                          | NM_178576:158           | Cpsf4         | INSIDE                 | 0.210                                                        | 0.495                          | 1597.11            | 791.11             | 0.104                          | 1135.02            | 118.17             |
| A_68_P23363729 | chr4:140938544-140938588                          | NM_001085513:14432      | Fam131c       | INSIDE                 | 0.210                                                        | 0.349                          | 2605.47            | 909.22             | 0.073                          | 2026.32            | 148.37             |
| A_68_P22342883 | chr3:95021867-95021911                            | NM_029885:-24           | Gabpb2        | PROMOTER               | 0.210                                                        | 0.533                          | 2194.14            | 1168.55            | 0.112                          | 1552.65            | 173.45             |
| A_68_P27327040 | chr10:88193638-88193682                           | NM_001037166:186        | Gm4925        | INSIDE                 | 0.210                                                        | 0.682                          | 1158.20            | 790.22             | 0.144                          | 860.64             | 123.59             |
| A_68_P31929497 | chr9:5567328-5567372                              | NM_001033448:-723       | Gm962         | DIVERGENT_PROMOTER     | 0.210                                                        | 0.396                          | 1771.28            | 701.58             | 0.083                          | 1400.99            | 116.79             |
| A_68_P32743828 | chrX:147451859-147451906                          | NM_198110:-17           | Gnl3l         | PROMOTER               | 0.210                                                        | 1.520                          | 1249.25            | 1899.02            | 0.320                          | 439.86             | 140.58             |
| A_68_P24783934 | chr6:117857089-117857136                          | NM_001166428:-709       | Hnrnpf        | PROMOTER               | 0.210                                                        | 0.593                          | 1355.27            | 803.51             | 0.124                          | 947.50             | 117.90             |
| A_68_P24773305 | chr6:115803441-115803485                          | NM_001167763:-83        | lft122        | DIVERGENT_PROMOTER     | 0.210                                                        | 0.521                          | 4045.60            | 2107.25            | 0.110                          | 2545.14            | 279.03             |
| A_68_P32682200 | chrX:133276451-133276498                          | NM_019768:-326          | Morf4l2       | PROMOTER               | 0.210                                                        | 2.160                          | 1277.76            | 2760.01            | 0.454                          | 556.76             | 252.51             |
| A_68_P29448045 | chr14:21460170-21460214                           | NM_021508:15570         | Myoz1         | DOWNSTREAM             | 0.210                                                        | 0.570                          | 1308.25            | 746.19             | 0.120                          | 1075.45            | 129.03             |
| A_68_P27180398 | chr10:60881315-60881364                           | NM_013611:620           | Nodal         | INSIDE                 | 0.210                                                        | 0.553                          | 1653.01            | 914.21             | 0.116                          | 1045.46            | 121.46             |
| A_68_P31958766 | chr19:12040692-12040739                           | NM_001033174:382        | Osbp          | INSIDE                 | 0.210                                                        | 0.549                          | 2021.86            | 1109.81            | 0.115                          | 1485.17            | 171.21             |
| A_68_P22282900 | chr3:82859514-82859558                            | NM_016784:77            | Plrg1         | INSIDE                 | 0.210                                                        | 0.651                          | 1292.96            | 841.12             | 0.136                          | 912.32             | 124.39             |
| A_68_P22778525 | chr4:22417373-22417424                            | NM_008899:-2120         | Pou3f2        | PROMOTER               | 0.210                                                        | 0.693                          | 1839.83            | 1275.14            | 0.145                          | 1322.69            | 192.24             |
| A_68_P21110359 | chr2:31492659-31492703                            | NM_001123362:-2876      | Prdm12        | PROMOTER               | 0.210                                                        | 0.527                          | 1536.65            | 809.63             | 0.110                          | 1149.29            | 126.98             |
| A_68_P31108129 | chr17:26205895-26205939                           | NM_001162868:206        | Rab11fip3     | INSIDE                 | 0.210                                                        | 0.412                          | 1898.53            | 782.04             | 0.087                          | 1363.38            | 118.20             |
| A_68_P27943646 | chr11:78304705-78304749                           | NM_001168521:6530       | Sarm1         | INSIDE                 | 0.210                                                        | 0.508                          | 1438.88            | 731.17             | 0.107                          | 1130.88            | 120.88             |
| A_68_P28051144 | chr11:97393113-97393157                           | NM_018873:43306         | Scrin1        | INSIDE                 | 0.210                                                        | 0.620                          | 1230.03            | 762.31             | 0.130                          | 902.66             | 117.54             |
| A_68_P27841685 | chr11:60033832-60033876                           | NM_011480:252           | Srebfl        | INSIDE                 | 0.210                                                        | 0.430                          | 1969.99            | 846.79             | 0.090                          | 1551.22            | 139.74             |
| A_68_P25949498 | chr8:72567097-72567141                            | NM_027481:407           | Supp1         | INSIDE                 | 0.210                                                        | 0.674                          | 1080.25            | 727.73             | 0.141                          | 883.59             | 124.97             |
| A_68_P23440545 | chr4:155148332-155148376                          | NM_147776:316           | Vwaa          | INSIDE                 | 0.210                                                        | 0.618                          | 1236.84            | 764.72             | 0.130                          | 912.07             | 118.50             |
| A_68_P29613709 | chr14:55305052-55305096                           | NM_021437:67            | 1700123O20Rik | INSIDE                 | 0.209                                                        | 0.597                          | 1182.48            | 705.82             | 0.125                          | 972.83             | 121.36             |
| A_68_P27306489 | chr10:84565593-84565637                           | NM_001013028:243        | Al597468      | INSIDE                 | 0.209                                                        | 0.401                          | 1986.43            | 796.55             | 0.084                          | 1449.41            | 121.45             |
| A_68_P27083331 | chr10:40021980-40022028                           | NM_009665:-10           | Amd1          | PROMOTER               | 0.209                                                        | 0.490                          | 1556.69            | 763.54             | 0.103                          | 1316.87            | 135.25             |
| A_68_P30498879 | chr15:102456094-102456138                         | NM_146065:-264          | Atf7          | PROMOTER               | 0.209                                                        | 0.676                          | 1260.49            | 851.60             | 0.141                          | 942.59             | 133.37             |
| A_68_P25007800 | chr7:25790566-25790610                            | NM_144921:326           | Atp1a3        | INSIDE                 | 0.209                                                        | 0.658                          | 5992.61            | 3945.69            | 0.138                          | 4462.89            | 613.87             |
| A_68_P29575961 | chr14:47008247-47008291                           | NM_007554:2006          | Bmp4          | INSIDE                 | 0.209                                                        | 0.677                          | 1030.31            | 697.63             | 0.142                          | 852.97             | 120.73             |
| A_68_P22348132 | chr3:96001190-96001234                            | NM_026975:297           | Bola1         | INSIDE                 | 0.209                                                        | 0.545                          | 1434.53            | 782.45             | 0.114                          | 1022.17            | 116.65             |
| A_68_P30475794 | chr15:98493006-98493053                           | NM_001080981:291        | Ddx23         | INSIDE                 | 0.209                                                        | 0.639                          | 2285.80            | 1460.93            | 0.134                          | 1669.03            | 222.94             |
| A_68_P28729567 | chr12:109940312-109940358                         | NM_001171002:182        | Degs2         | INSIDE                 | 0.209                                                        | 1.574                          | 1344.99            | 2117.06            | 0.329                          | 1051.35            | 345.38             |
| A_68_P26659810 | chr9:78328608-78328655                            | NM_010106:900           | Eef1a1        | INSIDE                 | 0.209                                                        | 0.441                          | 1641.13            | 723.39             | 0.092                          | 1262.23            | 116.02             |
| A_68_P22318559 | chr3:89124527-89124571                            | NM_010108:2253          | Efn3          | INSIDE                 | 0.209                                                        | 0.569                          | 1246.80            | 709.24             | 0.119                          | 1012.21            | 120.11             |
| A_68_P20863273 | chr1:180248534-180248578                          | NM_025511:-727          | Fam36a        | PROMOTER               | 0.209                                                        | 0.411                          | 3704.05            | 1521.18            | 0.086                          | 2683.04            | 230.25             |
| A_68_P22963965 | chr4:62021291-62021335                            | NM_001045528:270        | Fkbp15        | INSIDE                 | 0.209                                                        | 0.417                          | 1761.10            | 734.52             | 0.087                          | 1367.87            | 119.46             |
| A_68_P29055023 | chr13:55546318-55546369                           | NM_011938:-351          | Grk6          | PROMOTER               | 0.209                                                        | 0.531                          | 1579.54            | 838.79             | 0.111                          | 1085.71            | 120.68             |
| A_68_P22964786 | chr4:62163240-62163284                            | NM_024257:-28           | Hdh3          | PROMOTER               | 0.209                                                        | 0.526                          | 4534.31            | 2384.03            | 0.110                          | 3319.07            | 364.93             |
| A_68_P23931498 | chr5:101227159-101227203                          | NM_001081107:439        | Helq          | INSIDE                 | 0.209                                                        | 0.449                          | 1418.54            | 637.57             | 0.094                          | 1225.39            | 115.33             |
| A_68_P26022961 | chr8:87502281-87502328                            | NM_008416:343           | Junb          | INSIDE                 | 0.209                                                        | 0.546                          | 1447.23            | 789.73             | 0.114                          | 1027.33            | 117.18             |
| A_68_P27894955 | chr11:69225357-69225401                           | NM_001017426:1799       | Kdm6b         | INSIDE                 | 0.209                                                        | 0.460                          | 1724.87            | 792.89             | 0.096                          | 1266.95            | 121.57             |
| A_68_P26896522 | chr9:123626490-123626534                          | NM_033322:163           | Lztl1         | INSIDE                 | 0.209                                                        | 0.509                          | 1557.42            | 793.18             | 0.106                          | 1194.78            | 127.24             |
| A_68_P32119295 | chr9:42222796-42222840                            | NM_183195:940           | Marveld1      | INSIDE                 | 0.209                                                        | 0.625                          | 1289.12            | 805.26             | 0.131                          | 991.06             | 129.49             |

| ProbeName      | Target position of probe on CpG island microarray | TargetID                  | GeneSymbol    | CpG island Description | Ratio of relative methylation (TiO <sub>2</sub> -NP/Vehicle) | Sham group                     |                    |                    | TiO <sub>2</sub> -H group      |                    |                    |
|----------------|---------------------------------------------------|---------------------------|---------------|------------------------|--------------------------------------------------------------|--------------------------------|--------------------|--------------------|--------------------------------|--------------------|--------------------|
|                |                                                   |                           |               |                        |                                                              | Relative methylation (Cy5/Cy3) | Cy3 signal (Input) | Cy5 signal (MeDIP) | Relative methylation (Cy5/Cy3) | Cy3 signal (Input) | Cy5 signal (MeDIP) |
| A_68_P23936330 | chr5:102092926-102092970                          | NM_144955:782             | Nkx6-1        | INSIDE                 | 0.209                                                        | 0.313                          | 2159.98            | 675.14             | 0.065                          | 1813.16            | 118.67             |
| A_68_P26567746 | chr9:61762612-61762656                            | NM_018853:-317            | Rplp1         | PROMOTER               | 0.209                                                        | 0.563                          | 2224.76            | 1252.02            | 0.118                          | 1738.35            | 204.80             |
| A_68_P31923329 | chr19:4476649-4476693                             | NM_134164:473             | Syt12         | INSIDE                 | 0.209                                                        | 0.584                          | 1908.85            | 1114.19            | 0.122                          | 1492.52            | 181.69             |
| A_68_P20634930 | chr1:136605441-136605485                          | NM_009307:62205           | Syt2          | INSIDE                 | 0.209                                                        | 0.623                          | 1887.85            | 1177.05            | 0.130                          | 1439.02            | 187.36             |
| A_68_P27845268 | chr11:60692459-60692503                           | NM_001168507:60           | Tmem11        | INSIDE                 | 0.209                                                        | 0.462                          | 1528.73            | 705.52             | 0.096                          | 1235.84            | 118.93             |
| A_68_P32118296 | chr19:42056888-42056932                           | NM_145500:658             | Ubtid1        | INSIDE                 | 0.209                                                        | 0.569                          | 1433.39            | 815.35             | 0.119                          | 1000.59            | 118.92             |
| A_68_P22038452 | chr3:32409336-32409380                            | NM_001161818:-113         | Zfp639        | PROMOTER               | 0.209                                                        | 0.497                          | 1877.11            | 932.54             | 0.104                          | 1464.39            | 151.70             |
| A_68_P26158503 | chr8:112229246-112229291                          | NM_001167946:-180         | Zfp821        | PROMOTER               | 0.209                                                        | 0.587                          | 1375.93            | 808.02             | 0.123                          | 967.55             | 118.73             |
| A_68_P24336406 | chr6:31166272-31166316                            | ENSMUST00000115107:2139   |               | INSIDE                 | 0.209                                                        | 0.665                          | 1921.71            | 1278.28            | 0.139                          | 1373.14            | 191.27             |
| A_68_P21528941 | chr2:112295418-112295462                          | NM_133749:259             | 2900064A13Rik | INSIDE                 | 0.208                                                        | 0.657                          | 1184.08            | 778.36             | 0.137                          | 868.83             | 119.05             |
| A_68_P23720349 | chr5:58108780-58108824                            | NR_015588:356             | 4932441J04Rik | INSIDE                 | 0.208                                                        | 0.355                          | 2032.39            | 722.34             | 0.074                          | 1583.11            | 116.77             |
| A_68_P28836390 | chr13:14046166-14046215                           | NM_178640:-750            | B3galn12      | PROMOTER               | 0.208                                                        | 0.471                          | 1662.08            | 782.80             | 0.098                          | 1194.51            | 117.01             |
| A_68_P22859648 | chr4:40895242-40895286                            | NM_001171739:63           | Bag1          | INSIDE                 | 0.208                                                        | 0.672                          | 1045.28            | 702.02             | 0.139                          | 870.47             | 121.42             |
| A_68_P30599073 | chr16:22656907-22656951                           | NM_138650:376             | Dgkg          | INSIDE                 | 0.208                                                        | 0.398                          | 1936.43            | 771.09             | 0.083                          | 1520.32            | 125.83             |
| A_68_P26572470 | chr9:62659765-62659809                            | NM_010193:-331            | Fem1b         | PROMOTER               | 0.208                                                        | 0.734                          | 3215.67            | 2361.11            | 0.153                          | 2271.39            | 347.13             |
| A_68_P21536545 | chr2:113597825-113597869                          | NM_011824:959             | Grem1         | INSIDE                 | 0.208                                                        | 0.495                          | 1505.72            | 745.64             | 0.103                          | 1194.34            | 123.19             |
| A_68_P25656209 | chr8:11555685-11555729                            | NM_011919:-359            | Ing1          | DIVERGENT_PROMOTER     | 0.208                                                        | 1.456                          | 5723.71            | 8334.47            | 0.302                          | 3509.69            | 1061.17            |
| A_68_P23226467 | chr4:115563355-115563399                          | NM_001039124:6372         | Kncn          | DOWNSTREAM             | 0.208                                                        | 0.282                          | 2582.53            | 729.15             | 0.059                          | 2030.85            | 119.09             |
| A_68_P24624871 | chr6:88848565-88848609                            | NM_008564:188             | Mem2          | INSIDE                 | 0.208                                                        | 0.552                          | 1909.73            | 1053.30            | 0.115                          | 1419.60            | 162.77             |
| A_68_P25256094 | chr7:85723616-85723660                            | NM_008746:-914            | Ntrk3         | PROMOTER               | 0.208                                                        | 0.471                          | 1632.25            | 768.13             | 0.098                          | 1205.76            | 117.77             |
| A_68_P21496012 | chr2:105522220-105522268                          | NM_013627:5643            | Pax6          | INSIDE                 | 0.208                                                        | 0.658                          | 989.65             | 651.41             | 0.137                          | 886.93             | 121.32             |
| A_68_P30346763 | chr15:76028781-76028825                           | NM_201393:-163            | Plec          | PROMOTER               | 0.208                                                        | 0.582                          | 1177.22            | 685.59             | 0.121                          | 1012.57            | 122.73             |
| A_68_P29033515 | chr13:51747268-51747312                           | NM_029279:208             | Secisbp2      | INSIDE                 | 0.208                                                        | 0.435                          | 1823.23            | 793.52             | 0.091                          | 1354.61            | 122.85             |
| A_68_P31411739 | chr17:86017697-86017743                           | NR_038085:16              | Six3os1       | INSIDE                 | 0.208                                                        | 0.478                          | 1661.34            | 794.86             | 0.099                          | 1227.89            | 122.08             |
| A_68_P31926383 | chr19:5024065-5024109                             | NM_007854:81              | Slc29a2       | INSIDE                 | 0.208                                                        | 0.736                          | 4823.55            | 3549.49            | 0.153                          | 3181.33            | 487.98             |
| A_68_P23236666 | chr4:117508743-117508787                          | NM_008135:902             | Slc6a9        | INSIDE                 | 0.208                                                        | 1.603                          | 1739.84            | 2789.62            | 0.333                          | 1369.60            | 455.94             |
| A_68_P20833440 | chr1:174430851-174430895                          | NM_178598:496             | Tagln2        | INSIDE                 | 0.208                                                        | 1.526                          | 3322.33            | 5068.85            | 0.318                          | 2115.33            | 672.02             |
| A_68_P22871719 | chr4:43455836-43455880                            | NM_011571:710             | Tesk1         | INSIDE                 | 0.208                                                        | 0.547                          | 1291.16            | 706.00             | 0.114                          | 1078.75            | 122.79             |
| A_68_P22015871 | chr3:28161528-28161576                            | NM_001163009:-583         | Tnik          | PROMOTER               | 0.208                                                        | 0.685                          | 1661.47            | 1138.35            | 0.142                          | 1103.60            | 157.16             |
| A_68_P27833860 | chr11:58791364-58791408                           | NM_053168:-231            | Trim11        | PROMOTER               | 0.208                                                        | 0.587                          | 1611.99            | 946.59             | 0.122                          | 1170.48            | 142.80             |
| A_68_P28344357 | chr12:34643155-34643199                           | NM_011658:641             | Twist1        | INSIDE                 | 0.208                                                        | 0.519                          | 2328.00            | 1207.52            | 0.108                          | 1817.89            | 196.54             |
| A_68_P27241482 | chr10:72117682-72117727                           | NM_025635:62              | Zwint         | INSIDE                 | 0.208                                                        | 0.550                          | 2538.04            | 1397.16            | 0.114                          | 1784.68            | 203.97             |
| A_68_P30501993 | chr15:102916820-102916864                         | AF216290:299276           |               | INSIDE                 | 0.208                                                        | 0.679                          | 2967.95            | 2015.11            | 0.141                          | 2264.43            | 320.17             |
| A_68_P26219857 | chr8:122923797-122923841                          | ENSMUST00000127664:489078 |               | INSIDE                 | 0.208                                                        | 0.661                          | 1229.77            | 813.15             | 0.137                          | 987.87             | 135.61             |
| A_68_P23349878 | chr4:138686042-138686091                          | NR_033745:886             | 2310028011Rik | INSIDE                 | 0.207                                                        | 0.647                          | 2238.73            | 1447.58            | 0.134                          | 1701.77            | 227.33             |
| A_68_P33012177 | chr9_random:57060-57104                           | NR_027950:2390            | 4930526115Rik | DOWNSTREAM             | 0.207                                                        | 0.426                          | 2559.74            | 1089.63            | 0.088                          | 1905.00            | 167.60             |
| A_68_P28612738 | chr12:88225828-88225872                           | NM_145836:-86             | 6430527G18Rik | PROMOTER               | 0.207                                                        | 0.417                          | 1685.17            | 702.72             | 0.086                          | 1393.89            | 120.26             |
| A_68_P21061195 | chr2:22895595-22895639                            | NM_001077190:144          | Abi1          | INSIDE                 | 0.207                                                        | 0.689                          | 1127.46            | 777.11             | 0.143                          | 843.87             | 120.53             |
| A_68_P22411287 | chr3:108013581-108013625                          | NM_175183:250             | Atxn7l2       | INSIDE                 | 0.207                                                        | 0.553                          | 1489.46            | 824.29             | 0.115                          | 1006.84            | 115.32             |
| A_68_P21578342 | chr2:120834147-120834191                          | NM_010761:25              | Cendbp1       | INSIDE                 | 0.207                                                        | 0.497                          | 1474.35            | 732.77             | 0.103                          | 1131.62            | 116.70             |
| A_68_P29639453 | chr14:60216909-60216959                           | NM_001168535:-138         | Cdac1         | PROMOTER               | 0.207                                                        | 0.705                          | 1290.49            | 909.87             | 0.146                          | 858.38             | 125.57             |
| A_68_P22394781 | chr3:104855923-104855967                          | NM_001163332:-73          | Cttnbp2nl     | PROMOTER               | 0.207                                                        | 0.640                          | 1291.37            | 826.03             | 0.133                          | 925.04             | 122.58             |
| A_68_P23363728 | chr4:140938466-140938511                          | NM_001085513:14354        | Fam131c       | INSIDE                 | 0.207                                                        | 0.668                          | 2729.78            | 1822.27            | 0.138                          | 1996.94            | 275.52             |
| A_68_P20405972 | chr1:84836507-84836554                            | NM_025386:115             | Fbxo36        | INSIDE                 | 0.207                                                        | 0.611                          | 1513.41            | 924.52             | 0.126                          | 1158.18            | 146.33             |
| A_68_P20967779 | chr2:4322142-4322186                              | NM_001177843:143          | Frmf4a        | INSIDE                 | 0.207                                                        | 0.513                          | 1447.52            | 742.55             | 0.106                          | 1134.20            | 120.21             |
| A_68_P24798580 | chr6:120413892-120413937                          | NM_008359:700             | Il17ra        | INSIDE                 | 0.207                                                        | 0.566                          | 1714.17            | 969.72             | 0.117                          | 1354.93            | 158.53             |
| A_68_P28225282 | chr12:8929275-8929319                             | NM_008640:1184            | Laptn4a       | INSIDE                 | 0.207                                                        | 0.455                          | 2872.67            | 1306.34            | 0.094                          | 2023.07            | 190.15             |
| A_68_P22028766 | chr3:30407046-30407090                            | NM_021442:1341            | Mecom         | INSIDE                 | 0.207                                                        | 0.554                          | 1358.36            | 752.35             | 0.114                          | 1029.61            | 117.86             |
| A_68_P24818881 | chr6:125082179-125082232                          | NM_138747:305             | Nop2          | INSIDE                 | 0.207                                                        | 0.648                          | 1343.94            | 871.34             | 0.134                          | 892.32             | 120.00             |
| A_68_P32134817 | chr19:44911075-44911119                           | NM_011037:79213           | Pax2          | INSIDE                 | 0.207                                                        | 0.665                          | 3155.10            | 2098.20            | 0.137                          | 2086.37            | 286.87             |
| A_68_P23445966 | chr5:3596177-3596221                              | NM_027777:133             | Pex1          | INSIDE                 | 0.207                                                        | 0.601                          | 1327.02            | 798.14             | 0.125                          | 969.34             | 120.85             |

| ProbeName      | Target position of probe on CpG island microarray | TargetID               | GeneSymbol | CpG island Description | Ratio of relative methylation (TiO <sub>2</sub> -NP/Vehicle) | Sham group                     |                    |                    | TiO <sub>2</sub> -H group      |                    |                    |
|----------------|---------------------------------------------------|------------------------|------------|------------------------|--------------------------------------------------------------|--------------------------------|--------------------|--------------------|--------------------------------|--------------------|--------------------|
|                |                                                   |                        |            |                        |                                                              | Relative methylation (Cy5/Cy3) | Cy3 signal (Input) | Cy5 signal (MeDIP) | Relative methylation (Cy5/Cy3) | Cy3 signal (Input) | Cy5 signal (MeDIP) |
| A_68_P20642549 | chr1:137815494-137815538                          | NM_019645:85           | Pkp1       | INSIDE                 | 0.207                                                        | 0.556                          | 1379.07            | 766.37             | 0.115                          | 1012.58            | 116.56             |
| A_68_P32598390 | chrX:108010197-108010241                          | NM_008901:415          | Pou3f4     | INSIDE                 | 0.207                                                        | 1.766                          | 1988.11            | 3511.50            | 0.366                          | 770.87             | 282.44             |
| A_68_P28781843 | chr12:120081478-120081528                         | NM_177082:-3299        | Sp8        | PROMOTER               | 0.207                                                        | 0.633                          | 1141.75            | 722.26             | 0.131                          | 945.26             | 123.88             |
| A_68_P23364637 | chr4:141092753-141092798                          | NM_019763:1737         | Spen       | INSIDE                 | 0.207                                                        | 0.516                          | 2508.16            | 1294.92            | 0.107                          | 1890.18            | 201.74             |
| A_68_P26770646 | chr9:100543212-100543261                          | NM_009282:-805         | Stag1      | PROMOTER               | 0.207                                                        | 0.547                          | 1360.75            | 744.75             | 0.113                          | 1029.76            | 116.60             |
| A_68_P29243709 | chr13:96731427-96731477                           | NM_029210:171080       | Sv2c       | INSIDE                 | 0.207                                                        | 0.697                          | 1088.88            | 758.67             | 0.144                          | 842.99             | 121.36             |
| A_68_P25617013 | chr8:4275737-4275784                              | NM_011592:145          | Timm44     | INSIDE                 | 0.207                                                        | 1.605                          | 1445.75            | 2321.02            | 0.333                          | 1021.57            | 339.75             |
| A_68_P32010023 | chr19:22213713-22213757                           | NM_001035239:128       | Trpm3      | INSIDE                 | 0.207                                                        | 0.633                          | 1092.36            | 691.78             | 0.131                          | 890.32             | 116.73             |
| A_68_P22964621 | chr4:62131699-62131744                            | NM_023597:185          | Wdr31      | INSIDE                 | 0.207                                                        | 1.446                          | 1591.49            | 2301.38            | 0.299                          | 1144.37            | 341.99             |
| A_68_P21910191 | chr2:181100855-181100899                          | NM_001048148:749       | Zgpat      | INSIDE                 | 0.207                                                        | 0.519                          | 2327.42            | 1208.76            | 0.108                          | 1971.85            | 212.37             |
| A_68_P25509652 | chr7:135381090-135381137                          | NM_146205:243          | Armc5      | INSIDE                 | 0.206                                                        | 0.625                          | 1325.94            | 828.76             | 0.129                          | 959.78             | 123.47             |
| A_68_P27534362 | chr10:126607844-126607888                         | NM_027739:4980         | B4galnt1   | INSIDE                 | 0.206                                                        | 1.623                          | 5915.14            | 9597.99            | 0.335                          | 4256.99            | 1425.98            |
| A_68_P31102616 | chr17:25393043-25393087                           | NM_001163270:245       | Baiap3     | INSIDE                 | 0.206                                                        | 0.484                          | 1772.69            | 858.10             | 0.100                          | 1298.53            | 129.50             |
| A_68_P21425382 | chr2:91763987-91764031                            | NM_007699:1663         | Chrm4      | INSIDE                 | 0.206                                                        | 0.561                          | 1302.41            | 730.67             | 0.116                          | 1165.03            | 134.91             |
| A_68_P27540983 | chr10:127805581-127805626                         | NM_001081040:1490      | Coq10a     | INSIDE                 | 0.206                                                        | 0.541                          | 3351.38            | 1813.28            | 0.111                          | 2483.56            | 276.82             |
| A_68_P28581231 | chr12:82586058-82586102                           | NM_025461:17           | Cox16      | INSIDE                 | 0.206                                                        | 0.430                          | 1631.91            | 701.37             | 0.088                          | 1341.97            | 118.54             |
| A_68_P24600267 | chr6:84534196-84534247                            | NM_175475:9583         | Cyp26b1    | INSIDE                 | 0.206                                                        | 0.512                          | 1498.50            | 766.72             | 0.105                          | 1165.31            | 122.64             |
| A_68_P30791338 | chr16:58408465-58408509                           | NM_028523:-161         | Debid2     | PROMOTER               | 0.206                                                        | 0.524                          | 3810.82            | 1998.41            | 0.108                          | 2860.03            | 308.87             |
| A_68_P29150854 | chr13:75845732-75845776                           | NM_138953:823          | Eil2       | INSIDE                 | 0.206                                                        | 0.632                          | 2950.51            | 1864.78            | 0.130                          | 2282.07            | 297.40             |
| A_68_P29309821 | chr13:108948883-108948927                         | NM_028042:-27          | Ercc8      | DIVERGENT_PROMOTER     | 0.206                                                        | 0.464                          | 2242.55            | 1041.49            | 0.095                          | 1640.73            | 156.61             |
| A_68_P31544266 | chr18:21458217-21458261                           | NM_001033445:402       | Fam59a     | INSIDE                 | 0.206                                                        | 0.338                          | 2077.35            | 702.95             | 0.070                          | 1666.76            | 116.30             |
| A_68_P23591970 | chr5:34326722-34326766                            | NM_001033458:622       | Gm1673     | INSIDE                 | 0.206                                                        | 0.640                          | 1317.32            | 843.64             | 0.132                          | 919.47             | 121.41             |
| A_68_P23571063 | chr5:30481709-30481753                            | NM_145558:-131         | Hadhb      | DIVERGENT_PROMOTER     | 0.206                                                        | 0.550                          | 1400.06            | 770.27             | 0.114                          | 1102.29            | 125.21             |
| A_68_P28036515 | chr11:94938400-94938444                           | NM_013565:-394         | Irga3      | PROMOTER               | 0.206                                                        | 0.532                          | 1481.29            | 788.74             | 0.110                          | 1079.50            | 118.57             |
| A_68_P30423458 | chr15:88977331-88977375                           | NM_011161:2684         | Mapk11     | INSIDE                 | 0.206                                                        | 0.627                          | 1094.51            | 686.24             | 0.129                          | 926.20             | 119.72             |
| A_68_P30344675 | chr15:75714543-75714587                           | NM_172607:10347        | Naprt1     | DOWNSTREAM             | 0.206                                                        | 0.704                          | 1351.77            | 951.47             | 0.145                          | 1014.95            | 146.84             |
| A_68_P22378546 | chr3:101816277-101816321                          | NM_178777:2231         | Nhlh2      | INSIDE                 | 0.206                                                        | 0.441                          | 1622.57            | 715.38             | 0.091                          | 1330.59            | 121.14             |
| A_68_P28041049 | chr11:95691702-95691746                           | NM_153104:5911         | Phospho1   | INSIDE                 | 0.206                                                        | 0.379                          | 1814.12            | 687.98             | 0.078                          | 1469.47            | 114.85             |
| A_68_P31937065 | chr19:7050107-7050153                             | NM_008889:593          | Ppp1r14b   | INSIDE                 | 0.206                                                        | 0.620                          | 1412.19            | 875.28             | 0.128                          | 955.26             | 121.88             |
| A_68_P22933513 | chr4:55363588-55363632                            | NM_009011:697          | Rad23b     | INSIDE                 | 0.206                                                        | 0.722                          | 3535.60            | 2554.47            | 0.149                          | 2988.87            | 444.07             |
| A_68_P24040026 | chr5:121098911-121098955                          | NM_013832:102          | Rasal1     | INSIDE                 | 0.206                                                        | 1.637                          | 3219.68            | 5269.97            | 0.338                          | 2523.31            | 851.68             |
| A_68_P30670707 | chr16:35542109-35542153                           | NM_013661:683          | Sema5b     | INSIDE                 | 0.206                                                        | 0.690                          | 5977.77            | 4122.35            | 0.142                          | 4231.33            | 601.94             |
| A_68_P23997299 | chr5:113716482-113716526                          | NR_027934:-6883        | Sgsm1      | PROMOTER               | 0.206                                                        | 0.632                          | 1542.14            | 974.42             | 0.130                          | 1093.21            | 142.15             |
| A_68_P28963695 | chr13:39052121-39052165                           | NM_001170430:264       | Slc35b3    | INSIDE                 | 0.206                                                        | 0.352                          | 2444.68            | 861.62             | 0.073                          | 1875.39            | 136.47             |
| A_68_P31247137 | chr17:54437878-54437922                           | NM_022025:459          | Slc5a7     | INSIDE                 | 0.206                                                        | 0.676                          | 1031.82            | 697.71             | 0.139                          | 837.54             | 116.66             |
| A_68_P21911961 | chr2:181405887-181405931                          | NM_009236:437          | Sox18      | INSIDE                 | 0.206                                                        | 0.419                          | 1844.05            | 773.02             | 0.086                          | 1340.17            | 115.64             |
| A_68_P21835810 | chr2:167318513-167318557                          | NM_170756:-160         | Spata2     | PROMOTER               | 0.206                                                        | 0.443                          | 2442.29            | 1082.11            | 0.091                          | 1742.88            | 158.77             |
| A_68_P24907674 | chr6:142912449-142912500                          | NM_011374:498          | St8sia1    | INSIDE                 | 0.206                                                        | 0.641                          | 1077.96            | 690.69             | 0.132                          | 910.95             | 120.33             |
| A_68_P30255508 | chr15:59479606-59479650                           | NM_144549:-580         | Trib1      | PROMOTER               | 0.206                                                        | 0.566                          | 1128.83            | 638.86             | 0.117                          | 1002.69            | 117.03             |
| A_68_P27854526 | chr11:62364648-62364692                           | NM_011664:-335         | Ubb        | PROMOTER               | 0.206                                                        | 0.344                          | 2463.59            | 847.60             | 0.071                          | 1806.92            | 128.23             |
| A_68_P30660865 | chr16:33967049-33967093                           | NM_009471:19           | Umps       | INSIDE                 | 0.206                                                        | 0.507                          | 2569.49            | 1301.49            | 0.104                          | 2231.05            | 232.45             |
| A_68_P25447480 | chr7:123451642-123451686                          | ENSMUST00000106605:226 |            | INSIDE                 | 0.206                                                        | 0.473                          | 1486.39            | 703.19             | 0.098                          | 1230.35            | 120.17             |
| A_68_P21071433 | chr2:25187978-25188029                            | NR_027448:88           | AA543186   | INSIDE                 | 0.205                                                        | 0.617                          | 1139.84            | 703.03             | 0.127                          | 937.15             | 118.60             |
| A_68_P24600305 | chr6:84538923-84538970                            | NM_175475:4858         | Cyp26b1    | INSIDE                 | 0.205                                                        | 0.731                          | 2470.27            | 1804.54            | 0.149                          | 1827.62            | 273.18             |
| A_68_P26239891 | chr8:125967011-125967055                          | NM_054046:147          | Def8       | INSIDE                 | 0.205                                                        | 0.738                          | 3573.26            | 2635.91            | 0.151                          | 2702.48            | 408.50             |
| A_68_P28003586 | chr11:88921355-88921399                           | NM_019505:686          | Dgke       | INSIDE                 | 0.205                                                        | 0.488                          | 1550.72            | 756.41             | 0.100                          | 1202.65            | 120.29             |
| A_68_P26347068 | chr9:21229822-21229866                            | NM_001039520:456       | Dnm2       | INSIDE                 | 0.205                                                        | 0.679                          | 3523.93            | 2394.24            | 0.139                          | 2488.52            | 346.23             |
| A_68_P22071618 | chr3:38787168-38787212                            | NM_183221:1329         | Fat4       | INSIDE                 | 0.205                                                        | 0.479                          | 1581.88            | 758.06             | 0.098                          | 1187.12            | 116.78             |
| A_68_P25034759 | chr7:31837288-31837332                            | NM_052991:2562         | Fxyd1      | INSIDE                 | 0.205                                                        | 0.516                          | 1508.92            | 778.84             | 0.106                          | 1191.40            | 126.36             |
| A_68_P31484554 | chr18:9213845-9213889                             | NM_008058:1013         | Fzd8       | INSIDE                 | 0.205                                                        | 0.504                          | 1373.75            | 691.81             | 0.103                          | 1130.15            | 116.60             |
| A_68_P24449398 | chr6:52195787-52195837                            | NM_010450:-46          | Hoxa11     | PROMOTER               | 0.205                                                        | 0.417                          | 1997.63            | 832.36             | 0.086                          | 1403.88            | 120.15             |

| ProbeName      | Target position of probe on CpG island microarray | TargetID                | GeneSymbol    | CpG island Description | Ratio of relative methylation (TiO <sub>2</sub> -NP/Vehicle) | Sham group                     |                    |                    | TiO <sub>2</sub> -H group      |                    |                    |
|----------------|---------------------------------------------------|-------------------------|---------------|------------------------|--------------------------------------------------------------|--------------------------------|--------------------|--------------------|--------------------------------|--------------------|--------------------|
|                |                                                   |                         |               |                        |                                                              | Relative methylation (Cy5/Cy3) | Cy3 signal (Input) | Cy5 signal (MeDIP) | Relative methylation (Cy5/Cy3) | Cy3 signal (Input) | Cy5 signal (MeDIP) |
| A_68_P24591138 | chr6:83004321-83004365                            | NM_019752:223           | Htra2         | INSIDE                 | 0.205                                                        | 0.536                          | 1358.99            | 728.89             | 0.110                          | 1125.58            | 123.95             |
| A_68_P32746462 | chrX:148237878-148237922                          | NM_021523:76            | Huwei1        | INSIDE                 | 0.205                                                        | 1.411                          | 1026.71            | 1449.13            | 0.289                          | 400.33             | 115.65             |
| A_68_P27281295 | chr10:79612639-79612683                           | NM_021565:1626          | Midn          | INSIDE                 | 0.205                                                        | 0.381                          | 2238.43            | 853.50             | 0.078                          | 1564.83            | 122.55             |
| A_68_P30499097 | chr15:102502826-102502874                         | NR_030460:553           | Mir688        | PROMOTER               | 0.205                                                        | 0.601                          | 1299.35            | 780.72             | 0.123                          | 981.98             | 120.95             |
| A_68_P24796460 | chr6:119988597-119988641                          | NR_030487:4289          | Mir706        | PROMOTER               | 0.205                                                        | 0.575                          | 1994.68            | 1147.28            | 0.118                          | 1485.86            | 175.52             |
| A_68_P24932172 | chr6:146991149-146991196                          | NM_145573:-119          | Mrps35        | PROMOTER               | 0.205                                                        | 0.650                          | 968.71             | 629.59             | 0.133                          | 916.27             | 122.09             |
| A_68_P24112020 | chr5:134697723-134697767                          | NM_010876:7751          | Nef1          | INSIDE                 | 0.205                                                        | 1.742                          | 3557.52            | 6197.13            | 0.357                          | 2328.54            | 831.60             |
| A_68_P20370345 | chr1:78186294-78186338                            | NM_001159520:7395       | Pax3          | INSIDE                 | 0.205                                                        | 0.389                          | 2393.57            | 931.76             | 0.080                          | 2085.41            | 166.70             |
| A_68_P24119913 | chr5:136674484-136674528                          | NM_025774:318           | Prkrp1        | INSIDE                 | 0.205                                                        | 0.674                          | 2938.19            | 1979.41            | 0.138                          | 2100.59            | 290.08             |
| A_68_P21473125 | chr2:101636609-101636660                          | NM_001083810:1230       | Prr5l         | INSIDE                 | 0.205                                                        | 0.639                          | 1193.94            | 763.32             | 0.131                          | 910.97             | 119.39             |
| A_68_P26044789 | chr8:91567168-91567212                            | NM_021390:871           | Sall1         | INSIDE                 | 0.205                                                        | 0.554                          | 1453.85            | 805.70             | 0.114                          | 1052.79            | 119.57             |
| A_68_P22982499 | chr4:65266160-65266204                            | NM_001161782:163        | Trim32        | INSIDE                 | 0.205                                                        | 2.166                          | 12466.27           | 26998.36           | 0.443                          | 8254.48            | 3659.90            |
| A_68_P29143148 | chr13:74074758-74074802                           | NM_027182:435           | Trip13        | INSIDE                 | 0.205                                                        | 2.800                          | 7233.64            | 20250.81           | 0.575                          | 4920.66            | 2830.36            |
| A_68_P20820926 | chr1:172105452-172105507                          | NM_133806:402           | Uap1          | PROMOTER               | 0.205                                                        | 0.535                          | 1269.42            | 679.15             | 0.110                          | 1086.78            | 119.01             |
| A_68_P24136136 | chr5:140017148-140017192                          | NM_013702:-2681         | Unex          | PROMOTER               | 0.205                                                        | 0.410                          | 1855.71            | 761.57             | 0.084                          | 1437.44            | 121.11             |
| A_68_P30546657 | chr16:11175989-11176033                           | NM_145931:476           | Zc3h7a        | INSIDE                 | 0.205                                                        | 0.644                          | 2402.16            | 1546.32            | 0.132                          | 1818.70            | 240.31             |
| A_68_P22287008 | chr3:83593973-83594017                            | ENSMUST00000149626:-116 |               | PROMOTER               | 0.205                                                        | 0.360                          | 2166.55            | 780.64             | 0.074                          | 1577.98            | 116.62             |
| A_68_P28182937 | chr11:120046685-120046736                         | NR_030682:4460          | 2810410L24Rik | DOWNSTREAM             | 0.204                                                        | 0.708                          | 1312.95            | 929.89             | 0.144                          | 990.91             | 143.01             |
| A_68_P23320947 | chr4:133637971-133638015                          | NM_001162970:13626      | Aim1l         | INSIDE                 | 0.204                                                        | 0.553                          | 1238.36            | 685.15             | 0.113                          | 1041.24            | 117.48             |
| A_68_P28185537 | chr11:120460129-120460181                         | NM_001038230:309        | Anapc11       | INSIDE                 | 0.204                                                        | 0.523                          | 1413.86            | 738.97             | 0.106                          | 1145.06            | 121.88             |
| A_68_P31095793 | chr17:24306024-24306068                           | NR_037854:294           | Atp6v0c-ps2   | INSIDE                 | 0.204                                                        | 1.458                          | 5335.23            | 7779.95            | 0.298                          | 3518.06            | 1048.64            |
| A_68_P25392269 | chr7:112574333-112574377                          | NM_007627:21            | Cekbr         | INSIDE                 | 0.204                                                        | 0.744                          | 3037.40            | 2261.06            | 0.152                          | 2333.85            | 354.73             |
| A_68_P25422972 | chr7:119301935-119301979                          | NM_015814:615           | Dkk3          | INSIDE                 | 0.204                                                        | 2.165                          | 9130.25            | 19767.68           | 0.443                          | 5681.27            | 2514.80            |
| A_68_P21573664 | chr2:119979962-119980006                          | NM_133838:327           | Ehd4          | INSIDE                 | 0.204                                                        | 0.507                          | 1361.52            | 690.49             | 0.104                          | 1120.93            | 116.07             |
| A_68_P20842587 | chr1:176432270-176432314                          | NM_019445:337           | Fmn2          | INSIDE                 | 0.204                                                        | 0.704                          | 4111.06            | 2893.75            | 0.144                          | 2781.22            | 399.20             |
| A_68_P26761442 | chr9:98857658-98857702                            | NM_012020:1655          | Foxl2         | INSIDE                 | 0.204                                                        | 0.615                          | 1224.55            | 752.82             | 0.125                          | 962.15             | 120.56             |
| A_68_P29660138 | chr14:63870620-63870670                           | NM_008092:-6547         | Gata4         | PROMOTER               | 0.204                                                        | 0.546                          | 1439.97            | 785.91             | 0.111                          | 1087.14            | 120.86             |
| A_68_P24466586 | chr6:54942741-54942785                            | NM_026637:99            | Gget          | INSIDE                 | 0.204                                                        | 0.428                          | 1823.74            | 781.34             | 0.088                          | 1331.71            | 116.65             |
| A_68_P24116813 | chr5:136021029-136021073                          | NM_146001:-58           | Hip1          | PROMOTER               | 0.204                                                        | 0.560                          | 1404.69            | 786.06             | 0.114                          | 1097.20            | 125.40             |
| A_68_P23331344 | chr4:135502377-135502421                          | NM_008254:31            | Hmgcl         | INSIDE                 | 0.204                                                        | 0.594                          | 1240.26            | 736.22             | 0.121                          | 952.96             | 115.63             |
| A_68_P26586063 | chr9:64989672-64989716                            | NM_008988:699           | Igdec3        | INSIDE                 | 0.204                                                        | 0.657                          | 1706.16            | 1121.37            | 0.134                          | 1289.38            | 173.05             |
| A_68_P31516120 | chr18:15309236-15309280                           | NM_134112:697           | Ketd1         | INSIDE                 | 0.204                                                        | 0.585                          | 2412.99            | 1412.22            | 0.120                          | 1891.21            | 226.24             |
| A_68_P32752567 | chrX:149672709-149672753                          | NM_173780:143           | Klf8          | INSIDE                 | 0.204                                                        | 1.586                          | 2576.06            | 4085.29            | 0.323                          | 1015.29            | 328.05             |
| A_68_P25279951 | chr7:90016308-90016352                            | NM_175366:488           | Mex3b         | INSIDE                 | 0.204                                                        | 0.519                          | 1451.64            | 753.75             | 0.106                          | 1151.48            | 121.92             |
| A_68_P28055687 | chr11:98188542-98188588                           | NM_010895:2395          | Neurod2       | INSIDE                 | 0.204                                                        | 0.561                          | 1453.35            | 815.91             | 0.115                          | 1156.57            | 132.64             |
| A_68_P31926194 | chr19:4989799-4989843                             | NM_153553:151           | Npas4         | INSIDE                 | 0.204                                                        | 0.494                          | 1799.08            | 889.29             | 0.101                          | 1230.56            | 124.04             |
| A_68_P26980662 | chr10:19077212-19077256                           | NM_053008:890           | Olig3         | INSIDE                 | 0.204                                                        | 0.493                          | 1482.76            | 731.55             | 0.101                          | 1131.98            | 114.07             |
| A_68_P25948238 | chr8:72356673-72356717                            | NM_001024954:92         | Pbx4          | INSIDE                 | 0.204                                                        | 0.486                          | 1389.65            | 675.11             | 0.099                          | 1155.72            | 114.80             |
| A_68_P23176982 | chr4:104830286-104830330                          | NM_080555:357           | Ppap2b        | INSIDE                 | 0.204                                                        | 0.588                          | 2653.85            | 1560.48            | 0.120                          | 1893.15            | 226.67             |
| A_68_P27478501 | chr10:116386814-116386861                         | NM_001003950:599        | Rab3ip        | INSIDE                 | 0.204                                                        | 0.670                          | 1135.79            | 761.11             | 0.137                          | 870.62             | 119.07             |
| A_68_P31934220 | chr19:6363615-6363659                             | NM_001110791:-53        | Srl           | PROMOTER               | 0.204                                                        | 0.566                          | 2062.29            | 1168.25            | 0.115                          | 1363.93            | 157.53             |
| A_68_P28070587 | chr11:100721732-100721776                         | NM_001164062:-43        | Stat5a        | PROMOTER               | 0.204                                                        | 0.531                          | 1426.91            | 758.02             | 0.108                          | 1076.18            | 116.36             |
| A_68_P25959798 | chr8:74659599-74659643                            | NM_001001491:430        | Tpm4          | INSIDE                 | 0.204                                                        | 0.518                          | 3464.10            | 1794.52            | 0.105                          | 2558.82            | 269.81             |
| A_68_P24951867 | chr7:5013463-5013510                              | NM_001205231:-258       | U2af2         | PROMOTER               | 0.204                                                        | 0.628                          | 1088.31            | 683.19             | 0.128                          | 913.11             | 117.03             |
| A_68_P27981394 | chr11:84953213-84953257                           | NM_001029934:223        | Usp32         | INSIDE                 | 0.204                                                        | 0.729                          | 5481.35            | 3997.05            | 0.149                          | 4000.64            | 594.10             |
| A_68_P31204657 | chr17:46167697-46167741                           | NM_001110266:-5606      | Vegfa         | PROMOTER               | 0.204                                                        | 0.642                          | 2436.41            | 1563.93            | 0.131                          | 1890.76            | 247.36             |
| A_68_P31054974 | chr17:13185825-13185876                           | NM_175394:-445          | Wtap          | PROMOTER               | 0.204                                                        | 0.600                          | 1131.54            | 679.26             | 0.122                          | 997.11             | 122.05             |
| A_68_P26744827 | chr9:95855160-95855204                            | NM_011916:4             | Xrn1          | INSIDE                 | 0.204                                                        | 0.648                          | 1124.55            | 728.52             | 0.132                          | 905.68             | 119.45             |
| A_68_P27833210 | chr11:58680690-58680734                           | NM_172403:-29           | 2810021J22Rik | PROMOTER               | 0.203                                                        | 0.471                          | 1495.18            | 704.17             | 0.095                          | 1292.19            | 123.35             |
| A_68_P27897804 | chr11:69714837-69714881                           | NM_027419:-370          | 2810408A11Rik | DIVERGENT_PROMOTER     | 0.203                                                        | 0.623                          | 2830.13            | 1763.22            | 0.127                          | 2153.95            | 272.76             |
| A_68_P27554558 | chr11:3794697-3794745                             | NM_026150:409           | 4921536K21Rik | INSIDE                 | 0.203                                                        | 0.615                          | 1690.84            | 1039.26            | 0.125                          | 1225.11            | 153.16             |



| ProbeName      | Target position of probe on CpG island microarray | TargetID                | GeneSymbol    | CpG island Description | Ratio of relative methylation (TiO <sub>2</sub> -NP/Vehicle) | Sham group                     |                    |                    | TiO <sub>2</sub> -H group      |                    |                    |
|----------------|---------------------------------------------------|-------------------------|---------------|------------------------|--------------------------------------------------------------|--------------------------------|--------------------|--------------------|--------------------------------|--------------------|--------------------|
|                |                                                   |                         |               |                        |                                                              | Relative methylation (Cy5/Cy3) | Cy3 signal (Input) | Cy5 signal (MeDIP) | Relative methylation (Cy5/Cy3) | Cy3 signal (Input) | Cy5 signal (MeDIP) |
| A_68_P31624566 | chr18:36720188-36720232                           | NM_175375:-46           | Ankhd1        | PROMOTER               | 0.203                                                        | 0.676                          | 1116.52            | 754.30             | 0.137                          | 874.25             | 119.67             |
| A_68_P26883806 | chr9:121403762-121403806                          | NM_031161:1023          | Cck           | INSIDE                 | 0.203                                                        | 0.591                          | 2642.63            | 1560.77            | 0.120                          | 1986.84            | 238.69             |
| A_68_P32097109 | chr19:37773781-37773827                           | NM_007811:1507          | Cyp26a1       | INSIDE                 | 0.203                                                        | 0.472                          | 2573.06            | 1214.84            | 0.096                          | 2008.95            | 192.74             |
| A_68_P23226797 | chr4:115611470-115611514                          | NM_001025567:1039       | Dmbx1         | INSIDE                 | 0.203                                                        | 0.604                          | 2027.15            | 1225.38            | 0.123                          | 1562.01            | 191.89             |
| A_68_P32030685 | chr19:25680631-25680675                           | NM_177360:-4374         | Dmrt3         | PROMOTER               | 0.203                                                        | 0.698                          | 1697.10            | 1184.90            | 0.141                          | 1261.40            | 178.39             |
| A_68_P28602892 | chr12:86560540-86560584                           | NM_145445:100           | Eif2b2        | INSIDE                 | 0.203                                                        | 0.534                          | 1407.50            | 751.37             | 0.108                          | 1091.84            | 118.30             |
| A_68_P23270915 | chr4:124572399-124572443                          | NM_177671:13392         | Epha10        | DOWNSTREAM             | 0.203                                                        | 0.637                          | 3074.52            | 1957.06            | 0.129                          | 2382.37            | 307.28             |
| A_68_P22874562 | chr4:43970796-43970840                            | NM_027450:245           | Glipr2        | INSIDE                 | 0.203                                                        | 0.687                          | 2370.98            | 1629.69            | 0.139                          | 1874.53            | 261.24             |
| A_68_P26020979 | chr8:87186333-87186377                            | NM_010499:397           | Ier2          | INSIDE                 | 0.203                                                        | 0.426                          | 1628.62            | 694.60             | 0.086                          | 1404.48            | 121.32             |
| A_68_P29618998 | chr14:56254267-56254311                           | NM_024267:227           | Ipo4          | INSIDE                 | 0.203                                                        | 0.579                          | 1225.27            | 709.22             | 0.117                          | 1024.29            | 120.17             |
| A_68_P26227629 | chr8:124114089-124114133                          | NM_026160:-257          | Map11c3b      | PROMOTER               | 0.203                                                        | 0.467                          | 1645.46            | 768.07             | 0.095                          | 1245.84            | 117.86             |
| A_68_P22317890 | chr3:89017814-89017858                            | NM_001161824:421        | Mtx1          | INSIDE                 | 0.203                                                        | 0.737                          | 4415.74            | 3253.73            | 0.150                          | 2917.74            | 437.03             |
| A_68_P28246294 | chr12:12947123-12947167                           | NM_008709:1498          | Mycn          | INSIDE                 | 0.203                                                        | 0.485                          | 3235.04            | 1570.37            | 0.099                          | 2055.94            | 203.09             |
| A_68_P23543337 | chr5:24191628-24191672                            | NM_016736:18            | Nub1          | INSIDE                 | 0.203                                                        | 1.600                          | 4781.80            | 7649.06            | 0.324                          | 3187.57            | 1034.03            |
| A_68_P26142834 | chr8:109572130-109572174                          | NM_026513:362           | Pdf           | INSIDE                 | 0.203                                                        | 0.667                          | 2418.04            | 1612.21            | 0.135                          | 1921.62            | 260.15             |
| A_68_P29275481 | chr13:102538276-102538320                         | NM_001077495:-126       | Pik3r1        | PROMOTER               | 0.203                                                        | 0.522                          | 2880.19            | 1503.99            | 0.106                          | 2329.49            | 248.86             |
| A_68_P31207971 | chr17:46765981-46766025                           | NM_175168:451           | Ptk7          | INSIDE                 | 0.203                                                        | 0.523                          | 2923.74            | 1528.13            | 0.106                          | 2021.64            | 214.17             |
| A_68_P31257591 | chr17:56812887-56812931                           | NM_027933:229           | Ranbp3        | INSIDE                 | 0.203                                                        | 0.329                          | 2100.47            | 690.05             | 0.067                          | 1813.72            | 120.85             |
| A_68_P26809513 | chr9:107456377-107456421                          | NM_019713:-588          | Rassf1        | PROMOTER               | 0.203                                                        | 0.686                          | 1131.58            | 775.79             | 0.139                          | 839.72             | 116.60             |
| A_68_P23359686 | chr4:140258987-140259035                          | NM_173867:1623          | Rcc2          | INSIDE                 | 0.203                                                        | 0.601                          | 1281.87            | 770.88             | 0.122                          | 962.24             | 117.72             |
| A_68_P26143093 | chr8:109619905-109619949                          | NM_009353:519           | Terf2         | INSIDE                 | 0.203                                                        | 0.656                          | 2194.17            | 1440.32            | 0.133                          | 1586.25            | 211.56             |
| A_68_P23367601 | chr4:141640480-141640524                          | NM_145402:-283          | Tmem51        | PROMOTER               | 0.203                                                        | 0.504                          | 1862.95            | 939.53             | 0.102                          | 1420.14            | 145.43             |
| A_68_P27273026 | chr10:77707095-77707139                           | NM_001081055:271        | Trappc10      | INSIDE                 | 0.203                                                        | 0.411                          | 2015.47            | 827.41             | 0.083                          | 1647.53            | 137.20             |
| A_68_P20405961 | chr1:84835228-84835272                            | NM_133975:629           | Trip12        | INSIDE                 | 0.203                                                        | 1.596                          | 6729.40            | 10740.45           | 0.324                          | 4499.56            | 1458.85            |
| A_68_P31118859 | chr17:27993828-27993872                           | NM_001080769:399        | Uhrf1bp1      | INSIDE                 | 0.203                                                        | 0.657                          | 3498.82            | 2298.77            | 0.133                          | 2559.01            | 340.95             |
| A_68_P24002090 | chr5:114580992-114581036                          | NM_011677:-150          | Ung           | PROMOTER               | 0.203                                                        | 0.552                          | 1463.58            | 808.59             | 0.112                          | 1104.62            | 123.89             |
| A_68_P28931386 | chr13:32894845-32894889                           | NM_030215:968           | Wrnip1        | INSIDE                 | 0.203                                                        | 0.404                          | 2034.57            | 821.24             | 0.082                          | 1543.77            | 126.66             |
| A_68_P21810975 | chr2:163029586-163029630                          | ENSMUST00000128999:-680 |               | PROMOTER               | 0.203                                                        | 1.334                          | 9188.32            | 12258.04           | 0.270                          | 6087.24            | 1645.52            |
| A_68_P27933163 | chr11:76435980-76436032                           | ENSMUST00000155035:-190 |               | PROMOTER               | 0.203                                                        | 0.655                          | 1146.82            | 750.91             | 0.133                          | 903.75             | 120.10             |
| A_68_P21615858 | chr2:127657441-127657493                          | NM_001113179:129        | Bub1          | INSIDE                 | 0.202                                                        | 0.694                          | 1119.43            | 776.42             | 0.140                          | 852.83             | 119.77             |
| A_68_P26080248 | chr8:97441798-97441842                            | NM_001033533:178        | Ccdc102a      | INSIDE                 | 0.202                                                        | 0.696                          | 1400.12            | 974.39             | 0.141                          | 1161.98            | 163.33             |
| A_68_P24990418 | chr7:19495547-19495597                            | NM_001033314:181        | Ccdc61        | INSIDE                 | 0.202                                                        | 0.598                          | 1461.41            | 873.69             | 0.121                          | 1130.10            | 136.73             |
| A_68_P27937691 | chr11:77275964-77276008                           | NM_139128:-1428         | Coro6         | PROMOTER               | 0.202                                                        | 0.539                          | 4893.39            | 2636.77            | 0.109                          | 3266.74            | 356.09             |
| A_68_P26665915 | chr9:79607435-79607480                            | NM_009945:203           | Cox7a2        | INSIDE                 | 0.202                                                        | 0.652                          | 1853.07            | 1208.60            | 0.132                          | 1468.04            | 193.66             |
| A_68_P26585437 | chr9:64880753-64880797                            | NM_028906:510           | Dpp8          | INSIDE                 | 0.202                                                        | 0.730                          | 2641.78            | 1929.15            | 0.148                          | 1885.44            | 278.25             |
| A_68_P27845568 | chr11:60745336-60745380                           | NR_027800:11            | Gm16516       | INSIDE                 | 0.202                                                        | 0.424                          | 1765.82            | 749.44             | 0.086                          | 1337.97            | 114.76             |
| A_68_P27327041 | chr10:88193707-88193757                           | NM_001037166:114        | Gm4925        | INSIDE                 | 0.202                                                        | 0.712                          | 2460.09            | 1751.05            | 0.143                          | 1849.12            | 265.29             |
| A_68_P20739601 | chr1:157588425-157588469                          | NM_010712:711           | Lhx4          | INSIDE                 | 0.202                                                        | 0.494                          | 1652.57            | 816.53             | 0.100                          | 1243.00            | 123.79             |
| A_68_P21137726 | chr2:35946774-35946818                            | NM_001083126:12784      | Lhx6          | INSIDE                 | 0.202                                                        | 0.448                          | 2055.55            | 920.94             | 0.091                          | 1429.55            | 129.42             |
| A_68_P21137822 | chr2:35958973-35959017                            | NM_001083126:586        | Lhx6          | INSIDE                 | 0.202                                                        | 0.429                          | 2004.19            | 860.63             | 0.087                          | 1632.53            | 141.74             |
| A_68_P21122747 | chr2:33495004-33495053                            | NM_010725:1003          | Lmx1b         | INSIDE                 | 0.202                                                        | 0.543                          | 1509.64            | 820.36             | 0.110                          | 1078.16            | 118.27             |
| A_68_P26827665 | chr9:111020395-111020439                          | NM_001164838:-198       | Lrrfip2       | PROMOTER               | 0.202                                                        | 0.716                          | 2023.28            | 1449.50            | 0.144                          | 1379.14            | 199.20             |
| A_68_P23524106 | chr5:20561482-20561526                            | NM_011203:111           | Ptpn12        | INSIDE                 | 0.202                                                        | 0.431                          | 2473.67            | 1066.31            | 0.087                          | 1985.19            | 172.77             |
| A_68_P26706396 | chr9:87624611-87624655                            | NM_023814:1463          | Tbx18         | INSIDE                 | 0.202                                                        | 0.428                          | 1771.06            | 757.16             | 0.086                          | 1387.00            | 119.78             |
| A_68_P27892867 | chr11:68884346-68884390                           | NM_025838:58            | Tmem107       | INSIDE                 | 0.202                                                        | 0.364                          | 2524.41            | 919.11             | 0.074                          | 1745.29            | 128.44             |
| A_68_P25588179 | chr7:148514181-148514225                          | NR_024509:174           | Tmem80        | INSIDE                 | 0.202                                                        | 0.369                          | 1949.27            | 719.31             | 0.075                          | 1554.11            | 115.81             |
| A_68_P23296884 | chr4:129168378-129168422                          | NM_001085491:-33        | 1700125D06Rik | DIVERGENT_PROMOTER     | 0.201                                                        | 0.683                          | 1197.36            | 817.50             | 0.137                          | 877.02             | 120.53             |
| A_68_P32180644 | chr19:53216958-53217002                           | NM_001164100:-265       | Add3          | PROMOTER               | 0.201                                                        | 0.580                          | 4243.47            | 2462.55            | 0.117                          | 3297.27            | 384.65             |
| A_68_P26818138 | chr9:108976646-108976690                          | NM_172774:-30           | Atrip         | PROMOTER               | 0.201                                                        | 0.688                          | 2069.91            | 1423.61            | 0.139                          | 1605.61            | 222.50             |
| A_68_P23440041 | chr4:155069180-155069224                          | NM_178699:752           | B930041F14Rik | INSIDE                 | 0.201                                                        | 0.433                          | 2290.82            | 992.66             | 0.087                          | 1698.61            | 147.58             |
| A_68_P31202232 | chr17:45767295-45767346                           | NM_001013767:28938      | Capn11        | INSIDE                 | 0.201                                                        | 0.545                          | 1439.37            | 784.15             | 0.109                          | 1084.88            | 118.51             |

| ProbeName      | Target position of probe on CpG island microarray | TargetID           | GeneSymbol    | CpG island Description | Ratio of relative methylation (TiO <sub>2</sub> -NP/Vehicle) | Sham group                     |                    |                    | TiO <sub>2</sub> -H group      |                    |                    |
|----------------|---------------------------------------------------|--------------------|---------------|------------------------|--------------------------------------------------------------|--------------------------------|--------------------|--------------------|--------------------------------|--------------------|--------------------|
|                |                                                   |                    |               |                        |                                                              | Relative methylation (Cy5/Cy3) | Cy3 signal (Input) | Cy5 signal (MeDIP) | Relative methylation (Cy5/Cy3) | Cy3 signal (Input) | Cy5 signal (MeDIP) |
| A_68_P27187842 | chr10:62254957-62255001                           | NM_026201:138      | Cear1         | INSIDE                 | 0.201                                                        | 0.465                          | 1658.33            | 771.11             | 0.093                          | 1248.31            | 116.57             |
| A_68_P26590186 | chr9:65757328-65757375                            | NM_173185:535      | Cank1g1       | INSIDE                 | 0.201                                                        | 0.555                          | 1332.98            | 739.79             | 0.112                          | 1041.20            | 116.32             |
| A_68_P22609958 | chr3:145312902-145312946                          | NM_010516:25       | Cyr61         | INSIDE                 | 0.201                                                        | 0.534                          | 1382.71            | 737.81             | 0.107                          | 1107.28            | 118.96             |
| A_68_P23262655 | chr4:123088845-123088889                          | NM_001167918:288   | D830031N03Rik | INSIDE                 | 0.201                                                        | 0.680                          | 2105.68            | 1432.35            | 0.137                          | 1569.54            | 214.32             |
| A_68_P29310804 | chr13:109106277-109106321                         | NM_178683:-232     | Depdc1b       | PROMOTER               | 0.201                                                        | 0.653                          | 1030.65            | 673.28             | 0.131                          | 890.20             | 116.69             |
| A_68_P29681795 | chr14:67487454-67487502                           | NM_009955:-41      | Dpysl2        | DIVERGENT_PROMOTER     | 0.201                                                        | 0.617                          | 1264.24            | 780.41             | 0.124                          | 974.26             | 120.62             |
| A_68_P29204944 | chr13:88961571-88961615                           | NM_001037987:516   | Edil3         | INSIDE                 | 0.201                                                        | 0.629                          | 1172.78            | 738.12             | 0.126                          | 911.57             | 115.06             |
| A_68_P29292940 | chr13:105653878-105653922                         | NM_029984:73       | Fam159b       | INSIDE                 | 0.201                                                        | 0.551                          | 1329.81            | 732.42             | 0.111                          | 1074.31            | 119.08             |
| A_68_P29578549 | chr14:47442107-47442163                           | NM_022023:-217     | Gmfb          | DIVERGENT_PROMOTER     | 0.201                                                        | 0.504                          | 1458.55            | 734.90             | 0.101                          | 1152.78            | 116.58             |
| A_68_P25082509 | chr7:50721683-50721727                            | NM_001164518:23689 | Igln5         | DOWNSTREAM             | 0.201                                                        | 1.425                          | 2700.72            | 3849.50            | 0.286                          | 1906.16            | 544.92             |
| A_68_P27812424 | chr11:54674270-54674317                           | NM_029327:-200     | Lynn1         | DIVERGENT_PROMOTER     | 0.201                                                        | 0.614                          | 1145.31            | 703.43             | 0.123                          | 973.58             | 120.06             |
| A_68_P20337462 | chr1:72582708-72582752                            | NM_001045533:408   | Marchf4       | INSIDE                 | 0.201                                                        | 0.683                          | 1949.89            | 1331.51            | 0.137                          | 1454.01            | 199.79             |
| A_68_P23265181 | chr4:123582007-123582051                          | NM_019660:-227     | Mycbp         | PROMOTER               | 0.201                                                        | 0.384                          | 1828.94            | 702.29             | 0.077                          | 1497.45            | 115.71             |
| A_68_P25494916 | chr7:132635012-132635056                          | NM_026330:22       | Nsmce1        | INSIDE                 | 0.201                                                        | 0.540                          | 2314.21            | 1249.49            | 0.109                          | 1645.48            | 178.56             |
| A_68_P26242536 | chr8:126473255-126473299                          | NM_172288:-111     | Nup133        | PROMOTER               | 0.201                                                        | 0.322                          | 2254.66            | 726.10             | 0.065                          | 1823.86            | 117.95             |
| A_68_P21100055 | chr2:29745964-29746008                            | NM_001177662:404   | Od2           | INSIDE                 | 0.201                                                        | 0.609                          | 1174.99            | 715.00             | 0.122                          | 987.70             | 120.84             |
| A_68_P26640631 | chr9:74711117-74711161                            | NM_008262:1411     | Onecut1       | INSIDE                 | 0.201                                                        | 0.644                          | 1047.88            | 674.85             | 0.129                          | 900.21             | 116.27             |
| A_68_P28458297 | chr12:57797636-57797681                           | NM_011041:1033     | Pax9          | INSIDE                 | 0.201                                                        | 0.481                          | 1608.53            | 774.33             | 0.097                          | 1229.54            | 118.93             |
| A_68_P25326019 | chr7:99818550-99818594                            | NM_029078:-150     | Pcf11         | PROMOTER               | 0.201                                                        | 0.433                          | 1873.39            | 811.66             | 0.087                          | 1358.15            | 118.48             |
| A_68_P30578587 | chr16:18248121-18248165                           | NM_011239:645      | Ranbp1        | INSIDE                 | 0.201                                                        | 0.579                          | 1146.06            | 664.12             | 0.117                          | 1005.90            | 117.32             |
| A_68_P28534667 | chr12:74041473-74041517                           | NM_011384:563      | Six6          | INSIDE                 | 0.201                                                        | 0.707                          | 1249.09            | 883.01             | 0.142                          | 1026.02            | 145.52             |
| A_68_P28307269 | chr12:28028213-28028257                           | NM_009234:-651     | Sox11         | PROMOTER               | 0.201                                                        | 0.597                          | 2510.47            | 1499.70            | 0.120                          | 1675.13            | 200.76             |
| A_68_P32103865 | chr19:38911994-38912038                           | NM_145952:948      | Tbc1d12       | INSIDE                 | 0.201                                                        | 0.409                          | 1826.24            | 746.26             | 0.082                          | 1472.60            | 120.68             |
| A_68_P24608768 | chr6:86145664-86145708                            | NM_031199:442      | Tgfa          | INSIDE                 | 0.201                                                        | 0.461                          | 1548.42            | 713.33             | 0.092                          | 1238.73            | 114.54             |
| A_68_P23575088 | chr5:31172158-31172203                            | NM_144525:161      | Tmem214       | INSIDE                 | 0.201                                                        | 0.602                          | 2368.37            | 1425.35            | 0.121                          | 1444.20            | 174.87             |
| A_68_P24113930 | chr5:135408345-135408389                          | NM_024479:124      | Wbscr27       | INSIDE                 | 0.201                                                        | 0.706                          | 2367.41            | 1671.21            | 0.142                          | 1727.80            | 244.89             |
| A_68_P31879129 | chr18:83080856-83080900                           | NM_001177464:-3145 | Zfp516        | PROMOTER               | 0.201                                                        | 1.487                          | 1836.25            | 2730.14            | 0.298                          | 1301.81            | 388.17             |
| A_68_P30284263 | chr15:64753735-64753779                           | NM_009623:102      | Adecy8        | INSIDE                 | 0.200                                                        | 0.386                          | 2013.85            | 777.96             | 0.077                          | 1477.48            | 114.23             |
| A_68_P32200577 | chr19:56471803-56471847                           | NM_007611:206      | Casp7         | INSIDE                 | 0.200                                                        | 0.544                          | 2040.89            | 1110.40            | 0.109                          | 1849.95            | 200.84             |
| A_68_P29651431 | chr14:62305946-62306001                           | NR_028264:-4763    | Dleu2         | PROMOTER               | 0.200                                                        | 0.623                          | 1314.06            | 819.32             | 0.125                          | 978.36             | 122.26             |
| A_68_P29699021 | chr14:70477881-70477925                           | NM_018781:651      | Egr3          | INSIDE                 | 0.200                                                        | 0.651                          | 2839.06            | 1848.43            | 0.130                          | 2319.54            | 301.92             |
| A_68_P26685697 | chr9:83699258-83699303                            | NM_001145974:569   | Elov14        | INSIDE                 | 0.200                                                        | 1.549                          | 758.58             | 1174.68            | 0.310                          | 595.79             | 184.95             |
| A_68_P29050431 | chr13:54723325-54723369                           | NM_178397:202      | Faf2          | INSIDE                 | 0.200                                                        | 0.592                          | 1357.03            | 803.83             | 0.118                          | 992.95             | 117.46             |
| A_68_P30279146 | chr15:63891463-63891507                           | NM_144846:526      | Fam49b        | INSIDE                 | 0.200                                                        | 0.702                          | 1470.92            | 1032.91            | 0.141                          | 1240.59            | 174.59             |
| A_68_P31093565 | chr17:23908024-23908068                           | NM_153791:512      | Flywch1       | INSIDE                 | 0.200                                                        | 0.580                          | 1344.49            | 779.38             | 0.116                          | 1002.94            | 116.44             |
| A_68_P28246315 | chr12:12949549-12949593                           | NM_008709:-928     | Mycn          | PROMOTER               | 0.200                                                        | 0.464                          | 1639.65            | 760.27             | 0.093                          | 1287.97            | 119.40             |
| A_68_P27926998 | chr11:75401820-75401864                           | NM_008850:233      | Pitpna        | INSIDE                 | 0.200                                                        | 0.663                          | 1335.14            | 885.01             | 0.133                          | 1121.74            | 148.86             |
| A_68_P24984115 | chr7:17532440-17532484                            | NM_001099636:2432  | Pnmal2        | INSIDE                 | 0.200                                                        | 0.503                          | 1456.66            | 732.44             | 0.101                          | 1171.19            | 117.94             |
| A_68_P23542951 | chr5:24104726-24104770                            | NM_025891:3072     | Smardc3       | INSIDE                 | 0.200                                                        | 0.603                          | 2177.16            | 1312.59            | 0.121                          | 1575.82            | 190.31             |
| A_68_P25950579 | chr8:72758186-72758230                            | NM_001168290:84    | Sugp2         | INSIDE                 | 0.200                                                        | 0.491                          | 1547.57            | 759.29             | 0.098                          | 1268.99            | 124.75             |
| A_68_P30572946 | chr16:17277489-17277533                           | NM_177473:1118     | Tmem191c      | INSIDE                 | 0.200                                                        | 0.586                          | 1278.86            | 749.53             | 0.117                          | 1042.69            | 122.32             |
| A_68_P27287608 | chr10:80598003-80598047                           | NM_010731:-991     | Zbtb7a        | PROMOTER               | 0.200                                                        | 0.470                          | 1658.99            | 779.85             | 0.094                          | 1258.52            | 118.28             |
| A_68_P21823563 | chr2:165213394-165213441                          | NM_178411:342      | Zfp334        | INSIDE                 | 0.200                                                        | 0.484                          | 2097.41            | 1015.15            | 0.097                          | 1669.03            | 161.23             |
| A_68_P26552549 | chr9:59138886-59138933                            | NM_028121:-469     | Adpgk         | PROMOTER               | 0.199                                                        | 1.569                          | 699.77             | 1097.66            | 0.312                          | 432.76             | 135.16             |
| A_68_P26816846 | chr9:108729372-108729416                          | NM_080437:744      | Celsr3        | INSIDE                 | 0.199                                                        | 0.521                          | 3449.92            | 1796.89            | 0.104                          | 2478.45            | 257.31             |
| A_68_P28143423 | chr11:113544774-113544818                         | NM_138598:669      | D11Wsu99c     | INSIDE                 | 0.199                                                        | 0.623                          | 1170.45            | 729.50             | 0.124                          | 947.60             | 117.73             |
| A_68_P27543295 | chr10:128242767-128242811                         | NM_028873:57       | Dnajc14       | INSIDE                 | 0.199                                                        | 0.511                          | 1583.52            | 809.79             | 0.102                          | 1222.92            | 124.16             |
| A_68_P21933404 | chr3:8665074-8665126                              | NM_010423:1938     | Hey1          | INSIDE                 | 0.199                                                        | 0.690                          | 1111.30            | 766.70             | 0.138                          | 884.71             | 121.66             |
| A_68_P21037807 | chr2:17949322-17949366                            | NR_028378:469      | LOC100034739  | INSIDE                 | 0.199                                                        | 0.653                          | 1963.96            | 1282.65            | 0.130                          | 1479.02            | 192.21             |
| A_68_P31734233 | chr18:57292628-57292672                           | NM_001001979:-93   | Megf10        | PROMOTER               | 0.199                                                        | 0.624                          | 2747.69            | 1713.88            | 0.124                          | 2036.81            | 252.76             |
| A_68_P23609669 | chr5:37187204-37187251                            | NM_026242:766      | Mrfap1        | INSIDE                 | 0.199                                                        | 0.677                          | 1172.98            | 794.28             | 0.135                          | 880.28             | 118.67             |

| ProbeName      | Target position of probe on CpG island microarray | TargetID           | GeneSymbol    | CpG island Description | Ratio of relative methylation (TiO <sub>2</sub> -NP/Vehicle) | Sham group                     |                    |                    | TiO <sub>2</sub> -H group      |                    |                    |
|----------------|---------------------------------------------------|--------------------|---------------|------------------------|--------------------------------------------------------------|--------------------------------|--------------------|--------------------|--------------------------------|--------------------|--------------------|
|                |                                                   |                    |               |                        |                                                              | Relative methylation (Cy5/Cy3) | Cy3 signal (Input) | Cy5 signal (MeDIP) | Relative methylation (Cy5/Cy3) | Cy3 signal (Input) | Cy5 signal (MeDIP) |
| A_68_P21115162 | chr2:32252222-32252274                            | NM_133783:839      | Ptges2        | INSIDE                 | 0.199                                                        | 0.677                          | 1509.10            | 1021.34            | 0.135                          | 1036.54            | 139.73             |
| A_68_P26825587 | chr9:110645381-110645425                          | NM_001083936:-288  | Pth1r         | PROMOTER               | 0.199                                                        | 0.714                          | 2429.62            | 1735.16            | 0.142                          | 1721.31            | 244.66             |
| A_68_P28519206 | chr12:71328237-71328281                           | NM_133198:412      | Pygl          | INSIDE                 | 0.199                                                        | 0.564                          | 1439.20            | 811.22             | 0.112                          | 1124.78            | 126.31             |
| A_68_P29482227 | chr14:27354230-27354274                           | NM_032008:-1026    | Slmap         | PROMOTER               | 0.199                                                        | 0.534                          | 3110.16            | 1661.18            | 0.106                          | 2184.68            | 231.92             |
| A_68_P27281036 | chr10:79578010-79578054                           | NM_011492:-1248    | Stk11         | PROMOTER               | 0.199                                                        | 0.605                          | 1344.72            | 813.44             | 0.120                          | 959.33             | 115.55             |
| A_68_P30486394 | chr15:100382394-100382438                         | NM_033476:-38      | Tefcp2        | PROMOTER               | 0.199                                                        | 0.611                          | 2300.39            | 1405.40            | 0.122                          | 1870.95            | 227.84             |
| A_68_P28356088 | chr12:36768830-36768874                           | NM_025359:213      | Tspan13       | INSIDE                 | 0.199                                                        | 0.604                          | 3258.81            | 1968.73            | 0.120                          | 2354.42            | 282.63             |
| A_68_P20680089 | chr1:145624837-145624881                          | NM_001159866:451   | Uchl5         | INSIDE                 | 0.199                                                        | 0.635                          | 1275.72            | 810.46             | 0.126                          | 960.30             | 121.29             |
| A_68_P24541408 | chr6:72330305-72330349                            | NM_001080742:136   | Vamp5         | INSIDE                 | 0.199                                                        | 0.553                          | 3609.20            | 1994.65            | 0.110                          | 2799.63            | 308.22             |
| A_68_P27927819 | chr11:75547027-75547071                           | NM_009536:660      | Ywhae         | INSIDE                 | 0.199                                                        | 0.574                          | 4961.05            | 2848.34            | 0.114                          | 3732.30            | 425.80             |
| A_68_P21851437 | chr2:169959061-169959105                          | NM_001033299:-2362 | Zfp217        | PROMOTER               | 0.199                                                        | 0.543                          | 1373.10            | 745.41             | 0.108                          | 1100.18            | 118.92             |
| A_68_P31625899 | chr18:36953656-36953708                           | NM_025594:106      | Zmat2         | INSIDE                 | 0.199                                                        | 0.651                          | 1267.50            | 825.40             | 0.129                          | 927.30             | 120.06             |
| A_68_P31412806 | chr17:86200011-86200055                           | AK142122:810       |               | INSIDE                 | 0.199                                                        | 0.490                          | 1444.30            | 707.13             | 0.098                          | 1196.30            | 116.75             |
| A_68_P27383831 | chr10:98378471-98378515                           | NM_026482:707      | Atp2b1        | INSIDE                 | 0.198                                                        | 0.586                          | 1396.74            | 818.14             | 0.116                          | 1044.50            | 121.02             |
| A_68_P24172980 | chr5:148117798-148117842                          | NM_007673:1005     | Cdx2          | INSIDE                 | 0.198                                                        | 0.439                          | 1722.33            | 756.32             | 0.087                          | 1366.22            | 118.65             |
| A_68_P29270035 | chr13:101545475-101545519                         | NM_021886:358      | Cenph         | INSIDE                 | 0.198                                                        | 0.517                          | 3664.88            | 1893.96            | 0.103                          | 2523.96            | 258.79             |
| A_68_P20437269 | chr1:92500284-92500337                            | NM_133805:311      | Cops8         | INSIDE                 | 0.198                                                        | 0.693                          | 1048.40            | 726.11             | 0.137                          | 890.24             | 121.83             |
| A_68_P26015688 | chr8:86132717-86132768                            | NM_018808:669      | Dnajb1        | INSIDE                 | 0.198                                                        | 0.503                          | 1573.85            | 792.17             | 0.099                          | 1170.32            | 116.43             |
| A_68_P32183082 | chr19:53604536-53604581                           | NM_001085390:751   | Dusp5         | INSIDE                 | 0.198                                                        | 0.691                          | 1291.86            | 892.57             | 0.137                          | 906.88             | 124.01             |
| A_68_P27212434 | chr10:66999516-66999563                           | NM_010118:-1077    | Egr2          | PROMOTER               | 0.198                                                        | 2.177                          | 3937.19            | 8572.79            | 0.431                          | 2827.98            | 1219.76            |
| A_68_P22128829 | chr3:51080053-51080101                            | NM_023502:49833    | Ehf2          | INSIDE                 | 0.198                                                        | 0.430                          | 1871.37            | 804.06             | 0.085                          | 1416.45            | 120.23             |
| A_68_P29310182 | chr13:109005275-109005324                         | NM_029001:702      | Elov17        | INSIDE                 | 0.198                                                        | 0.580                          | 1308.98            | 758.75             | 0.115                          | 1013.94            | 116.38             |
| A_68_P28529999 | chr12:73171616-73171660                           | NM_181752:340      | Gpr135        | INSIDE                 | 0.198                                                        | 0.679                          | 5572.04            | 3785.44            | 0.134                          | 3970.28            | 533.12             |
| A_68_P25174410 | chr7:71084241-71084285                            | NM_021366:-461     | Klf13         | PROMOTER               | 0.198                                                        | 0.491                          | 1760.19            | 863.53             | 0.097                          | 1213.78            | 117.72             |
| A_68_P24129308 | chr5:138635505-138635553                          | NM_177878:-13      | Mblac1        | PROMOTER               | 0.198                                                        | 0.526                          | 1362.28            | 716.73             | 0.104                          | 1168.05            | 121.94             |
| A_68_P27924626 | chr11:74986914-74986958                           | NR_029794:47       | Mir212        | INSIDE                 | 0.198                                                        | 0.542                          | 1497.93            | 811.22             | 0.107                          | 1161.17            | 124.24             |
| A_68_P24981699 | chr7:17060079-17060123                            | NM_008718:2029     | Npas1         | INSIDE                 | 0.198                                                        | 0.694                          | 1308.38            | 908.12             | 0.137                          | 1075.54            | 147.48             |
| A_68_P30368842 | chr15:79664125-79664169                           | NM_001013360:617   | Npcd          | INSIDE                 | 0.198                                                        | 0.707                          | 1360.74            | 961.81             | 0.140                          | 834.02             | 116.60             |
| A_68_P21418379 | chr2:90519075-90519128                            | NM_021512:1730     | Nup160        | INSIDE                 | 0.198                                                        | 0.639                          | 1306.12            | 834.87             | 0.127                          | 920.60             | 116.71             |
| A_68_P24438215 | chr6:50406155-50406199                            | NM_001163645:-7    | Osbpl3        | PROMOTER               | 0.198                                                        | 0.635                          | 2993.58            | 1901.56            | 0.126                          | 2327.92            | 293.40             |
| A_68_P32240899 | chrX:7499781-7499825                              | NM_013892:2855     | Peskl1n       | INSIDE                 | 0.198                                                        | 1.476                          | 3780.26            | 5580.09            | 0.292                          | 1500.72            | 438.65             |
| A_68_P30670427 | chr16:35490517-35490561                           | NM_028295:421      | Pdia5         | INSIDE                 | 0.198                                                        | 0.487                          | 1977.23            | 963.58             | 0.097                          | 1496.50            | 144.72             |
| A_68_P25988742 | chr8:80959567-80959624                            | NM_138944:956      | Pou4f2        | INSIDE                 | 0.198                                                        | 0.557                          | 1502.78            | 837.75             | 0.111                          | 1094.76            | 121.00             |
| A_68_P28057822 | chr11:98544211-98544255                           | NM_009439:365      | Psmc3         | INSIDE                 | 0.198                                                        | 0.537                          | 1431.08            | 768.90             | 0.106                          | 1182.55            | 125.60             |
| A_68_P22372025 | chr3:100726540-100726584                          | NM_001165953:147   | Trim45        | INSIDE                 | 0.198                                                        | 1.549                          | 5632.82            | 8726.45            | 0.307                          | 3943.95            | 1209.26            |
| A_68_P31210122 | chr17:47147092-47147136                           | NM_001177374:367   | Ubr2          | INSIDE                 | 0.198                                                        | 0.375                          | 2160.65            | 809.81             | 0.074                          | 1648.66            | 122.20             |
| A_68_P25958199 | chr8:74194916-74194960                            | NM_001029873:718   | Unc13a        | INSIDE                 | 0.198                                                        | 0.511                          | 3020.20            | 1544.04            | 0.101                          | 2116.64            | 214.29             |
| A_68_P24376836 | chr6:38304039-38304083                            | NM_028421:543      | Zc3hav1       | INSIDE                 | 0.198                                                        | 0.594                          | 1904.89            | 1132.26            | 0.118                          | 1492.70            | 175.90             |
| A_68_P25581872 | chr7:147222785-147222830                          | NM_027201:518      | Zfp511        | INSIDE                 | 0.198                                                        | 0.307                          | 2758.23            | 848.04             | 0.061                          | 1939.46            | 118.02             |
| A_68_P28350336 | chr12:35591293-35591337                           | AK087563:335       |               | INSIDE                 | 0.198                                                        | 0.547                          | 3206.93            | 1754.78            | 0.108                          | 2244.79            | 243.17             |
| A_68_P30959870 | chr16:90934584-90934628                           | NM_026502:488      | 1110004E09Rik | INSIDE                 | 0.197                                                        | 1.493                          | 5615.36            | 8385.98            | 0.294                          | 3441.60            | 1013.47            |
| A_68_P28055087 | chr11:97302015-97302059                           | NM_021493:-9437    | Arhgap23      | PROMOTER               | 0.197                                                        | 0.691                          | 2072.10            | 1432.11            | 0.136                          | 1536.39            | 208.76             |
| A_68_P28183223 | chr11:120095537-120095581                         | NM_198423:1298     | Bahcc1        | INSIDE                 | 0.197                                                        | 0.628                          | 3099.37            | 1945.17            | 0.123                          | 2157.04            | 266.27             |
| A_68_P24160791 | chr5:145119346-145119390                          | NM_025833:-387     | Baiap211      | PROMOTER               | 0.197                                                        | 0.511                          | 2737.46            | 1399.69            | 0.101                          | 1963.30            | 197.57             |
| A_68_P32260568 | chrX:11704944-11704992                            | NM_001168321:32513 | Bcor          | INSIDE                 | 0.197                                                        | 1.927                          | 2757.03            | 5313.84            | 0.380                          | 1025.70            | 389.31             |
| A_68_P26486125 | chr9:47338950-47338994                            | NM_001025600:538   | Cadm1         | INSIDE                 | 0.197                                                        | 0.484                          | 2492.18            | 1207.29            | 0.096                          | 2010.82            | 192.05             |
| A_68_P25229722 | chr7:80682604-80682648                            | NM_001081345:4006  | Chd2          | INSIDE                 | 0.197                                                        | 0.581                          | 2332.22            | 1353.87            | 0.114                          | 1730.07            | 197.85             |
| A_68_P27540982 | chr10:127805462-127805508                         | NM_001081040:1609  | Coq10a        | INSIDE                 | 0.197                                                        | 0.641                          | 1315.01            | 843.25             | 0.126                          | 963.91             | 121.86             |
| A_68_P27991090 | chr11:86620800-86620848                           | NM_026191:338      | Dhx40         | INSIDE                 | 0.197                                                        | 0.604                          | 1360.71            | 821.31             | 0.119                          | 990.68             | 118.08             |
| A_68_P22318527 | chr3:89120595-89120646                            | NM_010108:6181     | Efn3          | INSIDE                 | 0.197                                                        | 0.642                          | 1459.59            | 937.30             | 0.127                          | 990.46             | 125.31             |
| A_68_P21940380 | chr3:10012548-10012592                            | NM_010634:-35      | Fabp5         | PROMOTER               | 0.197                                                        | 0.731                          | 3055.98            | 2235.36            | 0.144                          | 2143.35            | 308.92             |

| ProbeName      | Target position of probe on CpG island microarray | TargetID                 | GeneSymbol    | CpG island Description | Ratio of relative methylation (TiO <sub>2</sub> -NP/Vehicle) | Sham group                     |                    |                    | TiO <sub>2</sub> -H group      |                    |                    |
|----------------|---------------------------------------------------|--------------------------|---------------|------------------------|--------------------------------------------------------------|--------------------------------|--------------------|--------------------|--------------------------------|--------------------|--------------------|
|                |                                                   |                          |               |                        |                                                              | Relative methylation (Cy5/Cy3) | Cy3 signal (Input) | Cy5 signal (MeDIP) | Relative methylation (Cy5/Cy3) | Cy3 signal (Input) | Cy5 signal (MeDIP) |
| A_68_P31948840 | chr19:10257815-10257859                           | NM_146094:459            | Fads1         | INSIDE                 | 0.197                                                        | 0.627                          | 2789.64            | 1750.15            | 0.124                          | 2230.46            | 275.56             |
| A_68_P25125430 | chr7:59116936-59116980                            | NM_001115087:679         | Fancf         | INSIDE                 | 0.197                                                        | 0.438                          | 2024.92            | 887.03             | 0.086                          | 1566.38            | 135.31             |
| A_68_P24793359 | chr6:119431189-119431233                          | NM_133940:1525           | Fbx114        | INSIDE                 | 0.197                                                        | 0.616                          | 3279.68            | 2018.70            | 0.121                          | 2399.85            | 291.28             |
| A_68_P26406146 | chr9:32348818-32348862                            | NM_008026:113            | Fli1          | INSIDE                 | 0.197                                                        | 0.696                          | 4697.42            | 3267.47            | 0.137                          | 3409.21            | 468.18             |
| A_68_P31166994 | chr17:37188152-37188196                           | NM_019439:5264           | Gabbr1        | INSIDE                 | 0.197                                                        | 0.705                          | 1408.17            | 993.25             | 0.139                          | 1047.40            | 145.25             |
| A_68_P23968446 | chr5:108154743-108154789                          | NM_010278:-1403          | Gfi1          | PROMOTER               | 0.197                                                        | 0.423                          | 1821.50            | 770.49             | 0.083                          | 1481.81            | 123.26             |
| A_68_P28067610 | chr11:100216965-100217009                         | NM_010404:469            | Hap1          | INSIDE                 | 0.197                                                        | 0.415                          | 1901.36            | 788.50             | 0.082                          | 1501.29            | 122.56             |
| A_68_P23252897 | chr4:120404005-120404049                          | NM_001081142:15755       | Kcnq4         | INSIDE                 | 0.197                                                        | 0.550                          | 1613.43            | 886.66             | 0.108                          | 1095.09            | 118.31             |
| A_68_P20864288 | chr1:180458040-180458084                          | NM_001161665:-1193       | Kif26b        | PROMOTER               | 0.197                                                        | 0.677                          | 1096.79            | 742.44             | 0.133                          | 880.68             | 117.44             |
| A_68_P29696150 | chr14:70009101-70009145                           | NM_033325:-160           | Lox2          | PROMOTER               | 0.197                                                        | 0.598                          | 4983.34            | 2978.11            | 0.118                          | 3416.03            | 401.66             |
| A_68_P30655247 | chr16:32914173-32914217                           | NM_001081255:9           | Lrch3         | INSIDE                 | 0.197                                                        | 0.574                          | 1413.09            | 811.09             | 0.113                          | 1289.46            | 146.07             |
| A_68_P31130473 | chr17:30026432-30026476                           | NM_001081160:-1627       | Mdga1         | PROMOTER               | 0.197                                                        | 0.660                          | 1154.37            | 761.80             | 0.130                          | 942.24             | 122.67             |
| A_68_P24610518 | chr6:86475728-86475772                            | NM_011865:409            | Pebp1         | INSIDE                 | 0.197                                                        | 0.480                          | 2496.08            | 1198.88            | 0.094                          | 1985.48            | 187.55             |
| A_68_P23720374 | chr5:58111556-58111604                            | NM_018764:2321           | Pcdh7         | INSIDE                 | 0.197                                                        | 0.565                          | 1511.59            | 854.41             | 0.112                          | 1098.63            | 122.57             |
| A_68_P32535129 | chrX:90877426-90877470                            | NM_008892:46             | Pola1         | INSIDE                 | 0.197                                                        | 1.708                          | 1785.58            | 3049.75            | 0.337                          | 646.78             | 218.00             |
| A_68_P25015938 | chr7:27964028-27964072                            | NM_029391:-148           | Rab4b         | PROMOTER               | 0.197                                                        | 1.609                          | 6446.80            | 10373.43           | 0.318                          | 4121.72            | 1309.59            |
| A_68_P26748149 | chr9:96531046-96531090                            | NM_053268:854            | Rasa2         | INSIDE                 | 0.197                                                        | 0.591                          | 1442.12            | 852.04             | 0.117                          | 1172.93            | 136.65             |
| A_68_P28535261 | chr12:74146417-74146461                           | NM_009189:1261           | Six1          | INSIDE                 | 0.197                                                        | 0.492                          | 1985.22            | 975.89             | 0.097                          | 1337.98            | 129.75             |
| A_68_P32564413 | chrX:98728110-98728154                            | NM_001081008:59          | Taf1          | INSIDE                 | 0.197                                                        | 1.551                          | 837.42             | 1298.49            | 0.306                          | 376.49             | 115.13             |
| A_68_P31644531 | chr18:40378658-40378702                           | NM_023311:373            | Yipf5         | INSIDE                 | 0.197                                                        | 0.714                          | 2126.77            | 1517.65            | 0.141                          | 1486.92            | 209.42             |
| A_68_P23302996 | chr4:130417683-130417727                          | ENSMUST00000104193:-3909 |               | PROMOTER               | 0.197                                                        | 0.538                          | 1534.97            | 825.39             | 0.106                          | 1147.06            | 121.58             |
| A_68_P22552059 | chr3:135101503-135101547                          | NR_030689:105            | 4930539J05Rik | INSIDE                 | 0.196                                                        | 0.472                          | 1831.15            | 863.82             | 0.092                          | 1272.31            | 117.43             |
| A_68_P28710689 | chr12:106923839-106923883                         | NM_178613:299            | 4933433P14Rik | INSIDE                 | 0.196                                                        | 0.704                          | 1230.52            | 866.51             | 0.138                          | 979.94             | 135.01             |
| A_68_P24114259 | chr5:135484848-135484896                          | NM_001190437:-149        | Abhd11        | DIVERGENT_PROMOTER     | 0.196                                                        | 0.630                          | 1325.81            | 834.96             | 0.123                          | 990.99             | 122.26             |
| A_68_P30686065 | chr16:38452492-38452536                           | NM_007414:255            | Adprh         | INSIDE                 | 0.196                                                        | 0.558                          | 2277.40            | 1270.88            | 0.109                          | 1709.95            | 187.03             |
| A_68_P28059226 | chr11:98769291-98769335                           | NM_011799:-152           | Cdc6          | PROMOTER               | 0.196                                                        | 1.887                          | 10924.37           | 20613.09           | 0.371                          | 7249.68            | 2687.05            |
| A_68_P30778452 | chr16:55934493-55934544                           | NM_028815:443            | Cep97         | INSIDE                 | 0.196                                                        | 0.551                          | 1765.37            | 973.22             | 0.108                          | 1137.71            | 123.13             |
| A_68_P29056202 | chr13:55736711-55736755                           | NM_145975:345            | Ddx46         | INSIDE                 | 0.196                                                        | 0.649                          | 4914.27            | 3191.70            | 0.127                          | 3720.38            | 473.03             |
| A_68_P20726997 | chr1:155334160-155334214                          | NM_007842:604            | Dhx9          | INSIDE                 | 0.196                                                        | 0.534                          | 1455.22            | 776.93             | 0.105                          | 1158.21            | 121.50             |
| A_68_P28732704 | chr12:110691154-110691198                         | NM_001190703:-488        | Dlk1          | PROMOTER               | 0.196                                                        | 0.561                          | 1425.61            | 799.09             | 0.110                          | 1181.70            | 129.80             |
| A_68_P21114882 | chr2:32208948-32208992                            | NM_010065:-146           | Dnm1          | DIVERGENT_PROMOTER     | 0.196                                                        | 0.609                          | 1283.73            | 781.66             | 0.119                          | 1015.31            | 121.15             |
| A_68_P20825998 | chr1:172994760-172994804                          | NM_010188:-5248          | Fcgr3         | PROMOTER               | 0.196                                                        | 0.557                          | 6963.61            | 3879.52            | 0.109                          | 5761.66            | 629.67             |
| A_68_P27845445 | chr11:60727478-60727528                           | NM_025294:-208           | Gm16515       | PROMOTER               | 0.196                                                        | 0.655                          | 1274.17            | 834.69             | 0.129                          | 946.32             | 121.66             |
| A_68_P24783944 | chr6:117858262-117858321                          | NM_001166427:-9020       | Hnrnpf        | PROMOTER               | 0.196                                                        | 0.619                          | 1224.66            | 758.66             | 0.122                          | 970.06             | 117.89             |
| A_68_P30991547 | chr16:96413886-96413930                           | NM_001001492:-44         | Lca51         | DIVERGENT_PROMOTER     | 0.196                                                        | 0.543                          | 2338.07            | 1269.88            | 0.106                          | 1744.40            | 185.29             |
| A_68_P31829409 | chr18:74224278-74224322                           | NM_172632:303            | Mapk4         | INSIDE                 | 0.196                                                        | 0.652                          | 2563.25            | 1670.09            | 0.128                          | 1920.54            | 245.38             |
| A_68_P29446629 | chr14:21212600-21212644                           | NM_025440:155            | Mrps16        | INSIDE                 | 0.196                                                        | 0.543                          | 1403.41            | 761.67             | 0.106                          | 1137.12            | 120.71             |
| A_68_P30132589 | chr15:35223344-35223388                           | NM_054049:-2500          | Osr2          | PROMOTER               | 0.196                                                        | 0.499                          | 1353.64            | 675.98             | 0.098                          | 1179.00            | 115.20             |
| A_68_P27708453 | chr11:35582983-35583027                           | NM_145962:8              | Pank3         | INSIDE                 | 0.196                                                        | 0.442                          | 1834.62            | 811.64             | 0.087                          | 1387.60            | 120.16             |
| A_68_P29618377 | chr14:56159128-56159172                           | NM_028994:48             | Pck2          | INSIDE                 | 0.196                                                        | 0.562                          | 1662.31            | 934.91             | 0.110                          | 1178.46            | 129.72             |
| A_68_P23313962 | chr4:132324543-132324587                          | NM_011284:290            | Rpa2          | INSIDE                 | 0.196                                                        | 0.603                          | 3888.61            | 2346.23            | 0.119                          | 2862.84            | 339.39             |
| A_68_P31755042 | chr18:61173520-61173564                           | NM_201353:311            | Slc6a7        | INSIDE                 | 0.196                                                        | 0.528                          | 1881.91            | 994.11             | 0.103                          | 1465.17            | 151.44             |
| A_68_P24114433 | chr5:135517901-135517945                          | NM_016801:18481          | Stx1a         | INSIDE                 | 0.196                                                        | 1.446                          | 2560.20            | 3703.22            | 0.283                          | 1720.37            | 487.41             |
| A_68_P20878652 | chr1:182872565-182872613                          | NM_144794:-60            | Tmem63a       | PROMOTER               | 0.196                                                        | 0.478                          | 1818.60            | 870.04             | 0.094                          | 1294.30            | 121.41             |
| A_68_P31202520 | chr17:45822206-45822252                           | NM_198167:939            | Tmem63b       | INSIDE                 | 0.196                                                        | 0.619                          | 1416.25            | 876.64             | 0.121                          | 994.70             | 120.65             |
| A_68_P24019925 | chr5:117769743-117769788                          | NM_00103331:1491         | Vsig10        | INSIDE                 | 0.196                                                        | 0.476                          | 1496.85            | 712.00             | 0.093                          | 1262.77            | 117.99             |
| A_68_P30665018 | chr16:34574206-34574250                           | ENSMUST00000114961:-610  |               | PROMOTER               | 0.196                                                        | 0.390                          | 1884.70            | 734.76             | 0.077                          | 1509.78            | 115.55             |
| A_68_P26443871 | chr9:40338959-40339006                            | ENSMUST00000119373:-14   |               | PROMOTER               | 0.196                                                        | 0.447                          | 1550.72            | 693.13             | 0.088                          | 1313.04            | 115.08             |
| A_68_P27106295 | chr10:44249509-44249553                           | ENSMUST00000167340:-1223 |               | PROMOTER               | 0.196                                                        | 0.514                          | 3407.68            | 1752.99            | 0.101                          | 2569.56            | 259.32             |
| A_68_P28068583 | chr11:100389102-100389146                         | NM_001199296:190         | Acly          | INSIDE                 | 0.195                                                        | 0.399                          | 1972.04            | 787.31             | 0.078                          | 1513.68            | 118.02             |
| A_68_P24355040 | chr6:34267503-34267547                            | NM_009658:-35            | Akr1b3        | PROMOTER               | 0.195                                                        | 0.528                          | 1484.47            | 784.17             | 0.103                          | 1179.64            | 121.74             |

| ProbeName      | Target position of probe on CpG island microarray | TargetID                | GeneSymbol    | CpG island Description | Ratio of relative methylation (TiO <sub>2</sub> -NP/Vehicle) | Sham group                     |                    |                    | TiO <sub>2</sub> -H group      |                    |                    |
|----------------|---------------------------------------------------|-------------------------|---------------|------------------------|--------------------------------------------------------------|--------------------------------|--------------------|--------------------|--------------------------------|--------------------|--------------------|
|                |                                                   |                         |               |                        |                                                              | Relative methylation (Cy5/Cy3) | Cy3 signal (Input) | Cy5 signal (MeDIP) | Relative methylation (Cy5/Cy3) | Cy3 signal (Input) | Cy5 signal (MeDIP) |
| A_68_P30425163 | chr15:89259930-89259974                           | NR_004843:406           | BC090627      | INSIDE                 | 0.195                                                        | 0.544                          | 3456.39            | 1881.49            | 0.106                          | 2649.67            | 281.50             |
| A_68_P31134865 | chr17:30712521-30712565                           | NM_027060:690           | Btbd9         | INSIDE                 | 0.195                                                        | 0.574                          | 1343.54            | 770.52             | 0.112                          | 1059.10            | 118.55             |
| A_68_P22402367 | chr3:106350620-106350664                          | NM_133869:37            | Cept1         | INSIDE                 | 0.195                                                        | 0.590                          | 1253.08            | 739.59             | 0.115                          | 1042.28            | 120.12             |
| A_68_P23873911 | chr5:89193834-89193878                            | NM_007832:-181          | Dck           | PROMOTER               | 0.195                                                        | 0.548                          | 1875.09            | 1027.72            | 0.107                          | 1519.10            | 162.08             |
| A_68_P22869096 | chr4:42962948-42962992                            | NM_019874:-2995         | Dnajb5        | PROMOTER               | 0.195                                                        | 0.729                          | 3574.50            | 2607.49            | 0.142                          | 2533.01            | 359.98             |
| A_68_P23241426 | chr4:118293372-118293419                          | NM_026932:-8            | Ebna1bp2      | DIVERGENT_PROMOTER     | 0.195                                                        | 0.638                          | 1235.31            | 788.08             | 0.124                          | 927.85             | 115.34             |
| A_68_P30423843 | chr15:89027122-89027166                           | NM_027081:-239          | Fam116b       | PROMOTER               | 0.195                                                        | 0.559                          | 1347.01            | 752.51             | 0.109                          | 1113.67            | 121.29             |
| A_68_P26905371 | chr10:4541584-4541628                             | NM_025995:531           | Fbxo5         | INSIDE                 | 0.195                                                        | 0.422                          | 1778.22            | 750.04             | 0.082                          | 1423.04            | 117.12             |
| A_68_P26133209 | chr8:107871674-107871718                          | NM_177699:174           | Fhod1         | INSIDE                 | 0.195                                                        | 0.514                          | 1692.58            | 869.66             | 0.100                          | 1245.76            | 125.01             |
| A_68_P22405343 | chr3:107082203-107082254                          | NM_026774:453           | Hbxip         | INSIDE                 | 0.195                                                        | 0.715                          | 1392.62            | 996.07             | 0.139                          | 971.40             | 135.42             |
| A_68_P23417771 | chr4:151664685-151664729                          | NM_008237:1065          | Hes3          | INSIDE                 | 0.195                                                        | 0.556                          | 1313.42            | 729.88             | 0.108                          | 1141.18            | 123.41             |
| A_68_P28044105 | chr11:96227597-96227641                           | NM_008266:547           | Hoxb1         | INSIDE                 | 0.195                                                        | 0.495                          | 1785.36            | 884.48             | 0.097                          | 1300.11            | 125.76             |
| A_68_P23298318 | chr4:129419063-129419107                          | NM_011317:442           | Khdrbs1       | INSIDE                 | 0.195                                                        | 0.411                          | 1817.20            | 746.82             | 0.080                          | 1428.52            | 114.25             |
| A_68_P28693441 | chr12:103981601-103981648                         | NM_001142937:246        | Moap1         | INSIDE                 | 0.195                                                        | 0.666                          | 1141.53            | 760.21             | 0.130                          | 952.75             | 123.70             |
| A_68_P23637406 | chr5:42153189-42153233                            | NM_007524:2249          | Nkx3-2        | INSIDE                 | 0.195                                                        | 0.442                          | 1980.72            | 874.64             | 0.086                          | 1472.33            | 127.09             |
| A_68_P23617870 | chr5:38550639-38550683                            | NM_010942:46            | Nsg1          | INSIDE                 | 0.195                                                        | 0.577                          | 1256.40            | 725.24             | 0.112                          | 1185.89            | 133.22             |
| A_68_P32552414 | chrX:96086168-96086212                            | NM_052976:134           | Ophn1         | INSIDE                 | 0.195                                                        | 1.373                          | 1448.29            | 1988.71            | 0.268                          | 619.69             | 166.07             |
| A_68_P29479230 | chr14:26513644-26513688                           | NM_134084:11            | Ppiif         | INSIDE                 | 0.195                                                        | 0.482                          | 1816.19            | 875.31             | 0.094                          | 1342.43            | 126.31             |
| A_68_P28071211 | chr11:100830670-100830714                         | NM_008986:1239          | Ptfr          | INSIDE                 | 0.195                                                        | 1.562                          | 7198.03            | 11241.73           | 0.305                          | 4664.73            | 1420.47            |
| A_68_P22342532 | chr3:94964402-94964446                            | NM_011351:-3871         | Sema6c        | PROMOTER               | 0.195                                                        | 0.548                          | 1503.41            | 823.23             | 0.107                          | 1130.11            | 120.72             |
| A_68_P27804916 | chr11:53280008-53280053                           | NM_027917:9324          | Shroom1       | INSIDE                 | 0.195                                                        | 0.707                          | 2162.09            | 1527.52            | 0.138                          | 1797.46            | 247.22             |
| A_68_P30578493 | chr16:18234733-18234777                           | NM_172151:475           | Zdhhc8        | INSIDE                 | 0.195                                                        | 0.653                          | 1295.80            | 845.62             | 0.127                          | 898.37             | 114.44             |
| A_68_P25618382 | chr8:4677520-4677564                              | ENSMUST0000058918:823   |               | INSIDE                 | 0.195                                                        | 0.551                          | 2691.49            | 1482.30            | 0.107                          | 1952.07            | 209.27             |
| A_68_P31465575 | chr18:4921810-4921854                             | ENSMUST00000143254:109  |               | INSIDE                 | 0.195                                                        | 0.391                          | 3222.26            | 1259.73            | 0.076                          | 2570.37            | 195.59             |
| A_68_P32540012 | chrX:92185879-92185923                            | ENSMUST00000168067:8011 |               | DOWNSTREAM             | 0.195                                                        | 3.384                          | 2820.30            | 9543.72            | 0.658                          | 1129.69            | 743.56             |
| A_68_P2905105  | chr13:54666706-54666750                           | NM_133797:15            | 4833439L19Rik | INSIDE                 | 0.194                                                        | 0.550                          | 1363.30            | 749.81             | 0.107                          | 1169.34            | 124.90             |
| A_68_P28075090 | chr11:101526871-101526915                         | NM_025404:38            | Arl4d         | INSIDE                 | 0.194                                                        | 0.626                          | 2054.59            | 1287.08            | 0.121                          | 1449.01            | 175.80             |
| A_68_P23321454 | chr4:133742757-133742801                          | NM_144527:222           | Cecdc21       | INSIDE                 | 0.194                                                        | 0.580                          | 1512.87            | 877.58             | 0.112                          | 1021.32            | 114.73             |
| A_68_P21639432 | chr2:132089391-132089435                          | NM_138651:420           | Cds2          | INSIDE                 | 0.194                                                        | 0.679                          | 2146.73            | 1458.04            | 0.132                          | 1708.67            | 225.09             |
| A_68_P29310181 | chr13:109005203-109005247                         | NM_029001:627           | Elov17        | INSIDE                 | 0.194                                                        | 0.542                          | 1712.22            | 928.73             | 0.105                          | 1137.36            | 119.41             |
| A_68_P31544264 | chr18:21458028-21458072                           | NM_001033445:590        | Fam59a        | INSIDE                 | 0.194                                                        | 0.374                          | 2023.66            | 756.91             | 0.073                          | 1645.96            | 119.50             |
| A_68_P24992575 | chr7:19890451-19890495                            | NM_008036:4922          | Fosb          | INSIDE                 | 0.194                                                        | 0.507                          | 2537.61            | 1286.21            | 0.099                          | 1860.47            | 183.26             |
| A_68_P32380508 | chrX:49517357-49517405                            | NM_008150:720           | Gpc4          | INSIDE                 | 0.194                                                        | 1.566                          | 934.20             | 1463.14            | 0.304                          | 381.37             | 116.13             |
| A_68_P28883199 | chr13:23831258-23831302                           | NM_015786:605           | Hist1h1c      | INSIDE                 | 0.194                                                        | 0.450                          | 1895.51            | 852.57             | 0.087                          | 1428.11            | 124.46             |
| A_68_P28556953 | chr12:78063293-78063337                           | NM_001146176:-79        | Max           | PROMOTER               | 0.194                                                        | 1.514                          | 2927.83            | 4433.05            | 0.293                          | 2024.08            | 593.04             |
| A_68_P24117829 | chr5:136254539-136254583                          | NM_008617:42            | Mdh2          | INSIDE                 | 0.194                                                        | 0.537                          | 1534.04            | 823.93             | 0.104                          | 1230.67            | 128.20             |
| A_68_P23536409 | chr5:22939362-22939412                            | NM_026984:-860          | Mll5          | PROMOTER               | 0.194                                                        | 0.629                          | 1221.10            | 768.58             | 0.122                          | 1003.10            | 122.52             |
| A_68_P26871809 | chr9:119248880-119248924                          | NM_010851:256           | Myd88         | INSIDE                 | 0.194                                                        | 0.609                          | 2528.26            | 1540.03            | 0.118                          | 1924.18            | 227.84             |
| A_68_P30512786 | chr16:4939254-4939298                             | NM_025839:166           | Nudt16l1      | INSIDE                 | 0.194                                                        | 0.710                          | 2106.79            | 1495.70            | 0.137                          | 1362.72            | 187.33             |
| A_68_P27903590 | chr11:70783209-70783253                           | NM_001083331:234        | Nup88         | INSIDE                 | 0.194                                                        | 0.483                          | 1721.41            | 831.37             | 0.093                          | 1290.37            | 120.59             |
| A_68_P29269011 | chr13:101322401-101322445                         | NM_008756:31            | Ocln          | INSIDE                 | 0.194                                                        | 0.430                          | 1613.59            | 694.20             | 0.084                          | 1469.64            | 122.93             |
| A_68_P32464979 | chrX:71069627-71069676                            | NM_001029868:657        | Pdzd4         | INSIDE                 | 0.194                                                        | 1.750                          | 1041.83            | 1823.36            | 0.339                          | 435.07             | 147.53             |
| A_68_P20641447 | chr1:137662511-137662555                          | NM_013750:-129          | Phlda3        | PROMOTER               | 0.194                                                        | 1.773                          | 1946.44            | 3451.63            | 0.345                          | 1457.90            | 502.66             |
| A_68_P26918731 | chr10:6980219-6980263                             | NM_133485:151           | Ppp1r14c      | INSIDE                 | 0.194                                                        | 0.696                          | 1819.25            | 1266.44            | 0.135                          | 1490.70            | 190.15             |
| A_68_P22165088 | chr3:57540040-57540084                            | NM_011883:75            | Rnf13         | INSIDE                 | 0.194                                                        | 0.571                          | 1254.86            | 716.61             | 0.111                          | 1041.16            | 115.48             |
| A_68_P23593813 | chr5:34679537-34679581                            | NM_011278:520           | Rnf4          | INSIDE                 | 0.194                                                        | 0.453                          | 1658.92            | 750.71             | 0.088                          | 1396.42            | 122.33             |
| A_68_P31154741 | chr17:34740094-34740143                           | NM_019403:388           | Rnf5          | INSIDE                 | 0.194                                                        | 1.967                          | 1283.64            | 2525.31            | 0.381                          | 901.01             | 343.39             |
| A_68_P21078286 | chr2:26236121-26236165                            | NM_172339:31            | Snapc4        | INSIDE                 | 0.194                                                        | 0.520                          | 1546.42            | 803.53             | 0.101                          | 1186.67            | 119.36             |
| A_68_P26591018 | chr9:65917336-65917381                            | NM_001025612:180        | Snx22         | INSIDE                 | 0.194                                                        | 0.615                          | 1246.66            | 766.68             | 0.119                          | 971.79             | 115.90             |
| A_68_P27985513 | chr11:85643144-85643194                           | NM_009324:-2948         | Tbx2          | PROMOTER               | 0.194                                                        | 0.576                          | 1622.49            | 933.82             | 0.112                          | 1070.78            | 119.62             |
| A_68_P26421200 | chr9:35007442-35007486                            | NM_001177847:26         | Tirap         | INSIDE                 | 0.194                                                        | 0.332                          | 2449.66            | 813.48             | 0.064                          | 1934.19            | 124.68             |

| ProbeName      | Target position of probe on CpG island microarray | TargetID               | GeneSymbol    | CpG island Description | Ratio of relative methylation (TiO <sub>2</sub> -NP/Vehicle) | Sham group                     |                    |                    | TiO <sub>2</sub> -H group      |                    |                    |
|----------------|---------------------------------------------------|------------------------|---------------|------------------------|--------------------------------------------------------------|--------------------------------|--------------------|--------------------|--------------------------------|--------------------|--------------------|
|                |                                                   |                        |               |                        |                                                              | Relative methylation (Cy5/Cy3) | Cy3 signal (Input) | Cy5 signal (MeDIP) | Relative methylation (Cy5/Cy3) | Cy3 signal (Input) | Cy5 signal (MeDIP) |
| A_68_P23189069 | chr4:106851457-106851501                          | NM_029565:244          | Tmem59        | INSIDE                 | 0.194                                                        | 0.601                          | 2464.22            | 1481.85            | 0.117                          | 1760.27            | 205.58             |
| A_68_P30147677 | chr15:38008870-38008917                           | NM_001081359:-285      | Ubr5          | PROMOTER               | 0.194                                                        | 0.582                          | 1400.60            | 815.45             | 0.113                          | 1131.24            | 127.50             |
| A_68_P28155482 | chr11:115674860-115674904                         | NM_080643:24           | Caskin2       | INSIDE                 | 0.193                                                        | 0.515                          | 1341.42            | 691.00             | 0.099                          | 1189.23            | 118.05             |
| A_68_P24444437 | chr6:51420446-51420490                            | NM_007624:-146         | Cbx3          | DIVERGENT_PROMOTER     | 0.193                                                        | 0.670                          | 1005.84            | 674.35             | 0.129                          | 914.19             | 118.11             |
| A_68_P26519508 | chr9:53056259-53056305                            | NM_029936:-65          | Ddx10         | PROMOTER               | 0.193                                                        | 0.701                          | 2583.81            | 1810.45            | 0.135                          | 2035.72            | 275.47             |
| A_68_P27187161 | chr10:62114275-62114319                           | NM_053183:-350         | Ddx50         | PROMOTER               | 0.193                                                        | 0.560                          | 1385.79            | 776.04             | 0.108                          | 1152.33            | 124.81             |
| A_68_P20353308 | chr1:75313628-75313672                            | NM_016878:-58          | Dnpep         | PROMOTER               | 0.193                                                        | 0.586                          | 2248.50            | 1318.67            | 0.113                          | 1575.63            | 178.47             |
| A_68_P22483658 | chr3:122321383-122321434                          | NM_001114665:1177      | Fnbp11        | INSIDE                 | 0.193                                                        | 0.592                          | 1512.14            | 894.47             | 0.114                          | 1050.53            | 120.14             |
| A_68_P31982719 | chr19:16949088-16949132                           | NM_008023:-790         | Foxb2         | PROMOTER               | 0.193                                                        | 0.442                          | 1831.95            | 810.28             | 0.085                          | 1445.01            | 123.30             |
| A_68_P24116812 | chr5:136020886-136020930                          | NM_146001:84           | Hip1          | INSIDE                 | 0.193                                                        | 0.516                          | 1705.07            | 879.76             | 0.100                          | 1283.89            | 127.92             |
| A_68_P23592028 | chr5:34340360-34340404                            | NM_001001985:1750      | Nat8l         | INSIDE                 | 0.193                                                        | 0.513                          | 2354.20            | 1207.24            | 0.099                          | 1755.93            | 173.82             |
| A_68_P31112751 | chr17:26981297-26981344                           | NM_008700:-2810        | Nkx2-5        | PROMOTER               | 0.193                                                        | 0.683                          | 2648.97            | 1808.06            | 0.132                          | 1957.72            | 257.63             |
| A_68_P30368850 | chr15:79664958-79665002                           | NM_001013360:-217      | Nped          | PROMOTER               | 0.193                                                        | 0.619                          | 1309.22            | 811.01             | 0.119                          | 975.64             | 116.47             |
| A_68_P23292280 | chr4:128331714-128331758                          | NM_001195130:-209      | Phc2          | PROMOTER               | 0.193                                                        | 0.539                          | 1414.75            | 762.41             | 0.104                          | 1160.28            | 120.80             |
| A_68_P23545735 | chr5:24605832-24605876                            | NM_145401:606          | Prkg2         | INSIDE                 | 0.193                                                        | 0.495                          | 1571.63            | 777.85             | 0.095                          | 1228.51            | 117.24             |
| A_68_P28556142 | chr12:77923792-77923838                           | NM_134050:-303         | Rab15         | PROMOTER               | 0.193                                                        | 0.495                          | 1621.93            | 803.03             | 0.096                          | 1050.53            | 120.04             |
| A_68_P20723677 | chr1:154749026-154749070                          | NM_001005507:728       | Smg7          | INSIDE                 | 0.193                                                        | 1.370                          | 1351.08            | 1850.67            | 0.265                          | 992.60             | 263.05             |
| A_68_P29286846 | chr13:104563824-104563877                         | NM_172592:-9188        | Srek1         | PROMOTER               | 0.193                                                        | 0.570                          | 1311.67            | 747.61             | 0.110                          | 1110.43            | 122.08             |
| A_68_P25068287 | chr7:46799838-46799882                            | NM_001004139:26725     | Zfp619        | DOWNSTREAM             | 0.193                                                        | 0.585                          | 1305.08            | 763.29             | 0.113                          | 1030.77            | 116.47             |
| A_68_P22964916 | chr4:62180749-62180793                            | NM_008525:327          | Alad          | INSIDE                 | 0.192                                                        | 0.537                          | 1393.27            | 747.63             | 0.103                          | 1143.27            | 117.60             |
| A_68_P21219427 | chr2:52279977-52280021                            | NM_182994:396          | Arl5a         | INSIDE                 | 0.192                                                        | 0.580                          | 1441.71            | 836.71             | 0.111                          | 1059.03            | 118.00             |
| A_68_P24920859 | chr6:145024368-145024419                          | NM_007532:284          | Beat1         | INSIDE                 | 0.192                                                        | 0.566                          | 1492.74            | 844.31             | 0.108                          | 1078.33            | 116.81             |
| A_68_P28596925 | chr12:85533705-85533749                           | NM_001163502:1239      | C130039016Rik | INSIDE                 | 0.192                                                        | 0.530                          | 1437.34            | 761.46             | 0.102                          | 1168.46            | 118.93             |
| A_68_P31125924 | chr17:29231277-29231321                           | NM_007669:582          | Cdkn1a        | INSIDE                 | 0.192                                                        | 0.368                          | 2451.01            | 903.09             | 0.071                          | 1773.09            | 125.40             |
| A_68_P21642100 | chr2:132607157-132607201                          | NM_007694:165          | Chgb          | INSIDE                 | 0.192                                                        | 0.591                          | 2294.98            | 1357.31            | 0.113                          | 1674.37            | 189.70             |
| A_68_P32145753 | chr19:46835804-46835848                           | NM_001102471:-272      | Cnmn2         | PROMOTER               | 0.192                                                        | 0.536                          | 4318.38            | 2316.11            | 0.103                          | 3203.51            | 330.69             |
| A_68_P25272118 | chr7:88600431-88600478                            | NM_007755:-892         | Cpeb1         | PROMOTER               | 0.192                                                        | 0.531                          | 2124.81            | 1128.16            | 0.102                          | 1537.68            | 156.71             |
| A_68_P25026463 | chr7:30089112-30089158                            | NM_013874:111          | Dpfl1         | INSIDE                 | 0.192                                                        | 0.657                          | 1116.74            | 733.80             | 0.126                          | 926.69             | 116.75             |
| A_68_P24449832 | chr6:52260556-52260605                            | NM_007966:-2911        | Evx1          | PROMOTER               | 0.192                                                        | 0.640                          | 1276.58            | 816.42             | 0.123                          | 967.19             | 118.81             |
| A_68_P22324049 | chr3:90035487-90035531                            | NM_206924:-10          | Jtb           | PROMOTER               | 0.192                                                        | 0.558                          | 1541.99            | 860.32             | 0.107                          | 1114.74            | 119.16             |
| A_68_P26192689 | chr8:118232168-118232225                          | NM_001025577:-1402     | Maf           | PROMOTER               | 0.192                                                        | 0.462                          | 1766.37            | 816.22             | 0.089                          | 1352.51            | 119.73             |
| A_68_P32383983 | chrX:50097448-50097492                            | NR_029657:-1726        | Mir106a       | PROMOTER               | 0.192                                                        | 1.502                          | 1034.70            | 1553.93            | 0.288                          | 414.97             | 119.42             |
| A_68_P30883588 | chr16:76293765-76293824                           | NM_173440:79500        | Nrip1         | INSIDE                 | 0.192                                                        | 1.687                          | 1078.55            | 1819.69            | 0.324                          | 767.18             | 248.48             |
| A_68_P31926007 | chr19:4942924-4942968                             | NM_172835:146          | Peli3         | INSIDE                 | 0.192                                                        | 1.330                          | 6473.47            | 8606.76            | 0.255                          | 4962.52            | 1267.16            |
| A_68_P23585503 | chr5:33127970-33128014                            | NM_177298:283          | Pisd          | INSIDE                 | 0.192                                                        | 0.467                          | 1687.07            | 787.39             | 0.089                          | 1325.96            | 118.62             |
| A_68_P23435437 | chr4:154357997-154358041                          | NM_001113360:27075     | Plch2         | INSIDE                 | 0.192                                                        | 1.597                          | 480.09             | 766.75             | 0.306                          | 444.58             | 136.23             |
| A_68_P25367283 | chr7:107520379-107520423                          | NM_028292:6            | Ppme1         | INSIDE                 | 0.192                                                        | 0.673                          | 3551.19            | 2389.95            | 0.129                          | 2503.89            | 323.89             |
| A_68_P21110355 | chr2:31492078-31492122                            | NM_001123362:-3456     | Prdm12        | PROMOTER               | 0.192                                                        | 0.488                          | 1523.58            | 743.79             | 0.094                          | 1243.51            | 116.81             |
| A_68_P21004674 | chr2:11093675-11093725                            | NM_008859:-308         | Prkcq         | PROMOTER               | 0.192                                                        | 0.533                          | 1475.35            | 786.25             | 0.102                          | 1162.51            | 118.87             |
| A_68_P21750259 | chr2:152452978-152453022                          | NM_009047:257          | Rem1          | INSIDE                 | 0.192                                                        | 0.588                          | 1810.97            | 1065.00            | 0.113                          | 1342.19            | 151.80             |
| A_68_P25021324 | chr7:29135677-29135721                            | NM_013647:-9           | Rps16         | PROMOTER               | 0.192                                                        | 0.697                          | 2240.25            | 1562.32            | 0.134                          | 1498.69            | 200.78             |
| A_68_P30296503 | chr15:67007295-67007349                           | NM_009177:1122         | St3gal1       | INSIDE                 | 0.192                                                        | 0.628                          | 1380.77            | 867.23             | 0.121                          | 989.96             | 119.33             |
| A_68_P27286220 | chr10:80363685-80363729                           | NM_013895:8            | Timm13        | INSIDE                 | 0.192                                                        | 0.394                          | 2090.39            | 823.04             | 0.075                          | 1737.21            | 130.99             |
| A_68_P21819632 | chr2:164595210-164595259                          | NM_026785:-194         | Ube2c         | PROMOTER               | 0.192                                                        | 0.507                          | 1812.01            | 919.57             | 0.098                          | 1389.77            | 135.69             |
| A_68_P22485530 | chr3:122687874-122687932                          | NM_133857:-537         | Usp53         | PROMOTER               | 0.192                                                        | 0.674                          | 1165.29            | 785.53             | 0.129                          | 901.34             | 116.42             |
| A_68_P24114550 | chr5:135539661-135539705                          | NM_025375:298          | Wbscr22       | INSIDE                 | 0.192                                                        | 0.495                          | 2603.69            | 1290.00            | 0.095                          | 2108.83            | 200.85             |
| A_68_P21819854 | chr2:164630477-164630534                          | NM_178375:-108         | Zswim3        | DIVERGENT_PROMOTER     | 0.192                                                        | 0.437                          | 2240.88            | 978.95             | 0.084                          | 1423.24            | 119.47             |
| A_68_P22407293 | chr3:107385718-107385777                          |                        | Unknown       |                        | 0.192                                                        | 0.580                          | 1389.64            | 806.57             | 0.112                          | 1070.42            | 119.38             |
| A_68_P25618388 | chr8:4678211-4678255                              | ENSMUST00000058918:133 |               | INSIDE                 | 0.192                                                        | 0.549                          | 1420.56            | 779.95             | 0.106                          | 1133.33            | 119.73             |
| A_68_P23023125 | chr4:74924188-74924236                            | NM_025849:-22          | 3110001D03Rik | PROMOTER               | 0.191                                                        | 0.638                          | 1264.85            | 806.60             | 0.122                          | 1023.28            | 124.89             |
| A_68_P20161231 | chr1:38683942-38683986                            | NM_010678:37836        | Aff3          | INSIDE                 | 0.191                                                        | 0.433                          | 1946.82            | 842.06             | 0.083                          | 1422.82            | 117.60             |

| ProbeName      | Target position of probe on CpG island microarray | TargetID               | GeneSymbol    | CpG island Description | Ratio of relative methylation (TiO <sub>2</sub> -NP/Vehicle) | Sham group                     |                    |                    | TiO <sub>2</sub> -H group      |                    |                    |
|----------------|---------------------------------------------------|------------------------|---------------|------------------------|--------------------------------------------------------------|--------------------------------|--------------------|--------------------|--------------------------------|--------------------|--------------------|
|                |                                                   |                        |               |                        |                                                              | Relative methylation (Cy5/Cy3) | Cy3 signal (Input) | Cy5 signal (MeDIP) | Relative methylation (Cy5/Cy3) | Cy3 signal (Input) | Cy5 signal (MeDIP) |
| A_68_P23315178 | chr4:132568014-132568058                          | NM_146155:616          | Ahd1          | INSIDE                 | 0.191                                                        | 0.670                          | 2242.42            | 1502.03            | 0.128                          | 1618.48            | 207.13             |
| A_68_P21617365 | chr2:127951737-127951781                          | NM_009754:-15          | Bcl2l11       | PROMOTER               | 0.191                                                        | 0.321                          | 3559.69            | 1142.91            | 0.061                          | 2582.36            | 157.98             |
| A_68_P31323858 | chr17:69767042-69767093                           | NR_026848:1281         | C030034I22Rik | INSIDE                 | 0.191                                                        | 0.684                          | 1127.06            | 770.71             | 0.131                          | 921.76             | 120.68             |
| A_68_P31323854 | chr17:69766606-69766650                           | NR_026848:842          | C030034I22Rik | INSIDE                 | 0.191                                                        | 0.471                          | 1746.19            | 823.00             | 0.090                          | 1292.38            | 116.56             |
| A_68_P20880981 | chr1:183282461-183282505                          | NM_001160211:-276      | Cnih3         | PROMOTER               | 0.191                                                        | 0.578                          | 1375.16            | 795.22             | 0.111                          | 1102.05            | 121.91             |
| A_68_P29987885 | chr15:6336369-6336413                             | NM_001037905:-357      | Dab2          | PROMOTER               | 0.191                                                        | 0.683                          | 1021.79            | 698.10             | 0.131                          | 899.71             | 117.67             |
| A_68_P28914774 | chr13:30075826-30075881                           | NM_010093:2079         | E2f3          | INSIDE                 | 0.191                                                        | 0.573                          | 1418.79            | 813.17             | 0.109                          | 1115.78            | 121.98             |
| A_68_P32022550 | chr19:24354685-24354736                           | NM_008044:366          | Fxn           | INSIDE                 | 0.191                                                        | 0.385                          | 2407.72            | 926.92             | 0.074                          | 1747.14            | 128.46             |
| A_68_P25954808 | chr8:73421306-73421350                            | NM_001111116:-17       | Gm15427       | PROMOTER               | 0.191                                                        | 0.562                          | 1680.38            | 945.20             | 0.107                          | 1153.92            | 123.99             |
| A_68_P27286895 | chr10:80477880-80477928                           | NM_010319:-234         | Gng7          | PROMOTER               | 0.191                                                        | 0.491                          | 1568.92            | 770.85             | 0.094                          | 1250.67            | 117.50             |
| A_68_P23977819 | chr5:110536642-110536688                          | NM_145147:552          | Gtbp6         | INSIDE                 | 0.191                                                        | 1.714                          | 11771.56           | 20172.69           | 0.327                          | 7593.94            | 2486.50            |
| A_68_P27543983 | chr10:128370926-128370976                         | NM_008398:82           | Irga7         | INSIDE                 | 0.191                                                        | 0.597                          | 1527.24            | 911.40             | 0.114                          | 1089.23            | 123.86             |
| A_68_P32539360 | chrX:91786471-91786515                            | NM_019791:921          | Maged1        | INSIDE                 | 0.191                                                        | 1.882                          | 1482.38            | 2789.20            | 0.359                          | 567.37             | 203.64             |
| A_68_P25266322 | chr7:87515822-87515866                            | NM_172903:417          | Man2a2        | INSIDE                 | 0.191                                                        | 0.681                          | 4472.38            | 3046.27            | 0.130                          | 3535.23            | 458.91             |
| A_68_P23931503 | chr5:101227718-101227762                          | NM_026826:-37          | Mrps18c       | DIVERGENT_PROMOTER     | 0.191                                                        | 0.626                          | 2457.91            | 1538.68            | 0.120                          | 1769.91            | 211.62             |
| A_68_P23936297 | chr5:102088485-102088535                          | NM_144955:5220         | Nkx6-1        | INSIDE                 | 0.191                                                        | 0.702                          | 1248.69            | 876.50             | 0.134                          | 929.87             | 124.68             |
| A_68_P20221655 | chr1:51535170-51535214                            | NM_028696:51           | Obfc2a        | INSIDE                 | 0.191                                                        | 0.468                          | 1704.65            | 797.87             | 0.090                          | 1345.45            | 120.43             |
| A_68_P25009542 | chr7:26082633-26082677                            | NM_008776:320          | Pafah1b3      | INSIDE                 | 0.191                                                        | 0.620                          | 1313.21            | 813.87             | 0.118                          | 1054.27            | 124.82             |
| A_68_P20165368 | chr1:39425278-39425322                            | NM_053257:605          | Rpl31         | INSIDE                 | 0.191                                                        | 1.493                          | 6710.42            | 10020.69           | 0.286                          | 4482.70            | 1281.82            |
| A_68_P22412728 | chr3:108247875-108247920                          | NM_001204979:280       | Sars          | INSIDE                 | 0.191                                                        | 0.559                          | 1433.83            | 800.91             | 0.107                          | 1107.48            | 118.39             |
| A_68_P30424832 | chr15:89204085-89204129                           | NM_001111288:143       | Sco2          | INSIDE                 | 0.191                                                        | 0.587                          | 1327.50            | 779.70             | 0.112                          | 1073.59            | 120.28             |
| A_68_P32016820 | chr19:23348207-23348251                           | NM_153808:139          | Smc5          | INSIDE                 | 0.191                                                        | 0.612                          | 1393.84            | 852.92             | 0.117                          | 1030.85            | 120.76             |
| A_68_P31381753 | chr17:80606810-80606854                           | NM_001195485:-187      | Srsf7         | DIVERGENT_PROMOTER     | 0.191                                                        | 0.533                          | 1673.20            | 891.30             | 0.102                          | 1304.47            | 132.97             |
| A_68_P24880085 | chr6:137683395-137683454                          | NM_011499:-178         | Strap         | PROMOTER               | 0.191                                                        | 0.550                          | 1376.24            | 757.23             | 0.105                          | 1134.99            | 119.24             |
| A_68_P30207182 | chr15:50721909-50721953                           | NM_032000:-343         | Trps1         | PROMOTER               | 0.191                                                        | 0.533                          | 2195.85            | 1171.01            | 0.102                          | 1747.98            | 177.69             |
| A_68_P2295052  | chr4:59202854-59202909                            | NM_011673:460          | Ugeg          | INSIDE                 | 0.191                                                        | 0.493                          | 2628.45            | 1296.85            | 0.094                          | 1261.71            | 119.09             |
| A_68_P24130229 | chr5:138882742-138882786                          | NM_028130:61           | Zfp157        | INSIDE                 | 0.191                                                        | 0.575                          | 1298.43            | 746.98             | 0.110                          | 1082.33            | 119.03             |
| A_68_P24922451 | chr6:145289321-145289369                          |                        | Unknown       |                        | 0.191                                                        | 0.587                          | 1537.12            | 902.50             | 0.112                          | 1104.48            | 123.71             |
| A_68_P22509000 | chr3:127201404-127201450                          | ENSMUST00000104965:493 |               | DOWNSTREAM             | 0.191                                                        | 0.685                          | 1075.89            | 736.50             | 0.131                          | 890.04             | 116.59             |
| A_68_P21814245 | chr2:163575768-163575812                          | NM_007398:123          | Ada           | INSIDE                 | 0.190                                                        | 0.575                          | 2172.96            | 1250.34            | 0.109                          | 1562.42            | 170.93             |
| A_68_P26459683 | chr9:42913398-42913453                            | NM_027144:376          | Arhgef12      | INSIDE                 | 0.190                                                        | 0.544                          | 1537.57            | 835.73             | 0.103                          | 1139.07            | 117.86             |
| A_68_P24766251 | chr6:114593227-114593277                          | NM_028835:110          | Atg7          | INSIDE                 | 0.190                                                        | 0.532                          | 1515.19            | 805.42             | 0.101                          | 1194.24            | 120.70             |
| A_68_P26134610 | chr8:108089960-108090004                          | NM_013477:-42          | Atp6v0d1      | PROMOTER               | 0.190                                                        | 0.562                          | 1340.84            | 752.90             | 0.107                          | 1105.59            | 117.94             |
| A_68_P23440850 | chr4:155205944-155205991                          | NM_025338:213          | Aurkaip1      | INSIDE                 | 0.190                                                        | 0.514                          | 1693.57            | 870.12             | 0.097                          | 1242.51            | 121.00             |
| A_68_P28836391 | chr13:14046280-14046324                           | NM_178640:-638         | B3galnt2      | PROMOTER               | 0.190                                                        | 0.545                          | 1475.05            | 803.54             | 0.103                          | 1131.74            | 116.94             |
| A_68_P28103527 | chr11:106650485-106650529                         | NM_001166685:-59       | Ccdc45        | DIVERGENT_PROMOTER     | 0.190                                                        | 0.524                          | 1551.87            | 813.42             | 0.099                          | 1214.68            | 120.75             |
| A_68_P24347496 | chr6:33009915-33009959                            | NM_025336:216          | Chchd3        | INSIDE                 | 0.190                                                        | 0.685                          | 3361.95            | 2302.32            | 0.130                          | 2480.97            | 322.69             |
| A_68_P25313631 | chr7:97592513-97592557                            | NM_145151:1244         | Crebzf        | INSIDE                 | 0.190                                                        | 0.590                          | 1691.83            | 998.28             | 0.112                          | 1274.77            | 143.18             |
| A_68_P31158511 | chr17:35379261-35379306                           | NM_019693:593          | Ddx39b        | INSIDE                 | 0.190                                                        | 0.665                          | 1603.70            | 1067.12            | 0.126                          | 1117.59            | 141.27             |
| A_68_P27895681 | chr11:69359967-69360011                           | NM_001081330:2622      | Dnahc2        | INSIDE                 | 0.190                                                        | 0.551                          | 1375.31            | 757.70             | 0.104                          | 1123.98            | 117.42             |
| A_68_P28923680 | chr13:31651196-31651240                           | NM_008239:1180         | Foxq1         | INSIDE                 | 0.190                                                        | 0.435                          | 1817.96            | 791.00             | 0.083                          | 1430.00            | 118.14             |
| A_68_P20351515 | chr1:74998648-74998692                            | NM_010544:-445         | lh1           | PROMOTER               | 0.190                                                        | 0.582                          | 1885.80            | 1097.69            | 0.111                          | 1479.57            | 163.90             |
| A_68_P25953303 | chr8:73197017-73197061                            | NM_015816:-91          | Lsm4          | PROMOTER               | 0.190                                                        | 0.633                          | 3049.94            | 1931.25            | 0.120                          | 2058.76            | 247.77             |
| A_68_P29448046 | chr14:21460257-21460301                           | NM_021508:15484        | Myoz1         | DOWNSTREAM             | 0.190                                                        | 0.607                          | 1437.59            | 872.07             | 0.115                          | 1176.43            | 135.38             |
| A_68_P32374347 | chrX:48371964-48372008                            | NM_172413:-791         | Rap2c         | PROMOTER               | 0.190                                                        | 1.458                          | 1877.31            | 2737.70            | 0.277                          | 894.54             | 247.55             |
| A_68_P23233430 | chr4:116961488-116961532                          | NM_025739:208010       | Rnf220        | INSIDE                 | 0.190                                                        | 0.674                          | 1272.30            | 857.73             | 0.128                          | 1015.19            | 129.73             |
| A_68_P30577646 | chr16:18127970-18128014                           | NM_022982:194          | Rtn4r         | INSIDE                 | 0.190                                                        | 0.524                          | 1336.50            | 700.59             | 0.100                          | 1200.85            | 119.71             |
| A_68_P25362154 | chr7:106631883-106631927                          | NR_002172:-462         | Snord15a      | PROMOTER               | 0.190                                                        | 0.480                          | 2397.94            | 1152.03            | 0.091                          | 1735.84            | 158.48             |
| A_68_P23590341 | chr5:34000502-34000546                            | NM_026698:-43          | Tmem129       | DIVERGENT_PROMOTER     | 0.190                                                        | 0.444                          | 1953.75            | 866.77             | 0.084                          | 1407.78            | 118.48             |
| A_68_P31886140 | chr18:84261455-84261501                           | NM_146090:3929         | Zadhd2        | INSIDE                 | 0.190                                                        | 0.706                          | 1682.30            | 1187.94            | 0.134                          | 1350.96            | 181.01             |
| A_68_P24951776 | chr7:5003006-5003050                              | NM_026900:-105         | Zfp580        | PROMOTER               | 0.190                                                        | 0.514                          | 3152.43            | 1619.80            | 0.097                          | 2211.55            | 215.50             |

| ProbeName      | Target position of probe on CpG island microarray | TargetID            | GeneSymbol    | CpG island Description | Ratio of relative methylation (TiO <sub>2</sub> -NP/Vehicle) | Sham group                     |                    |                    | TiO <sub>2</sub> -H group      |                    |                    |
|----------------|---------------------------------------------------|---------------------|---------------|------------------------|--------------------------------------------------------------|--------------------------------|--------------------|--------------------|--------------------------------|--------------------|--------------------|
|                |                                                   |                     |               |                        |                                                              | Relative methylation (Cy5/Cy3) | Cy3 signal (Input) | Cy5 signal (MeDIP) | Relative methylation (Cy5/Cy3) | Cy3 signal (Input) | Cy5 signal (MeDIP) |
| A_68_P27563481 | chr11:5345058-5345102                             | NM_001080924-230    | Znrf3         | PROMOTER               | 0.190                                                        | 0.554                          | 3769.09            | 2087.22            | 0.105                          | 2964.57            | 311.38             |
| A_68_P21770587 | chr2:156137562-156137616                          | NM_027585-620       | 4921517L17Rik | PROMOTER               | 0.189                                                        | 0.483                          | 1762.59            | 851.11             | 0.091                          | 1271.12            | 116.03             |
| A_68_P26808313 | chr9:107301962-107302006                          | NM_001174047-226    | Caena2d2      | PROMOTER               | 0.189                                                        | 0.654                          | 1831.03            | 1197.03            | 0.124                          | 1408.19            | 174.06             |
| A_68_P30792739 | chr16:58670948-58670993                           | NM_007757:650       | Cpox          | INSIDE                 | 0.189                                                        | 0.680                          | 1324.47            | 900.03             | 0.128                          | 1009.72            | 129.66             |
| A_68_P23145554 | chr4:99323682-99323726                            | NM_010425:715       | Foxd3         | INSIDE                 | 0.189                                                        | 0.694                          | 4633.99            | 3218.02            | 0.131                          | 3146.09            | 412.53             |
| A_68_P20294255 | chr1:64783028-64783072                            | NM_001042659-1274   | Fzd5          | INSIDE                 | 0.189                                                        | 0.588                          | 2056.42            | 1210.10            | 0.111                          | 1543.33            | 172.02             |
| A_68_P28082093 | chr11:102754576-102754620                         | NM_010277:3916      | Gfap          | INSIDE                 | 0.189                                                        | 0.441                          | 1791.23            | 789.73             | 0.084                          | 1385.42            | 115.70             |
| A_68_P22346156 | chr3:95685923-95685967                            | NM_001033302:207    | Gm129         | INSIDE                 | 0.189                                                        | 0.555                          | 2301.14            | 1276.79            | 0.105                          | 1761.90            | 184.70             |
| A_68_P32239707 | chrX:7274604-7274648                              | NM_173747:367       | Gpkow         | INSIDE                 | 0.189                                                        | 2.356                          | 1363.34            | 3212.02            | 0.446                          | 587.75             | 262.05             |
| A_68_P23778450 | chr5:69947976-69948020                            | NM_172711-182       | Gul1          | PROMOTER               | 0.189                                                        | 0.647                          | 2022.79            | 1308.46            | 0.122                          | 1565.78            | 191.15             |
| A_68_P22056223 | chr3:35899395-35899439                            | NM_023644:184       | Mccc1         | INSIDE                 | 0.189                                                        | 0.613                          | 4751.54            | 2913.71            | 0.116                          | 3569.33            | 414.04             |
| A_68_P25285301 | chr7:91032798-91032845                            | NM_030705:30        | Mesdc1        | INSIDE                 | 0.189                                                        | 0.632                          | 1311.23            | 829.13             | 0.120                          | 982.24             | 117.63             |
| A_68_P20354397 | chr1:75483176-75483220                            | NM_178884:19829     | Obsl1         | INSIDE                 | 0.189                                                        | 0.684                          | 1499.12            | 1026.11            | 0.129                          | 938.26             | 121.49             |
| A_68_P21913061 | chr2:181572625-181572669                          | NM_153594:39        | Pemt2         | INSIDE                 | 0.189                                                        | 0.464                          | 1747.52            | 810.57             | 0.088                          | 1337.42            | 117.03             |
| A_68_P28119821 | chr11:109511777-109511821                         | NM_021880-464       | Prkar1a       | PROMOTER               | 0.189                                                        | 0.633                          | 1457.86            | 922.16             | 0.120                          | 974.94             | 116.81             |
| A_68_P27280979 | chr10:79565571-79565615                           | NM_183426-145       | Sbno2         | PROMOTER               | 0.189                                                        | 0.530                          | 1545.81            | 818.67             | 0.100                          | 1157.92            | 115.89             |
| A_68_P28224330 | chr12:8779493-8779537                             | NM_011519:1313      | Sdc1          | INSIDE                 | 0.189                                                        | 0.480                          | 1837.77            | 882.41             | 0.091                          | 1368.81            | 123.90             |
| A_68_P21912034 | chr2:181415230-181415274                          | NM_009326:238       | Teca2         | INSIDE                 | 0.189                                                        | 0.419                          | 2077.63            | 871.07             | 0.079                          | 1646.34            | 130.75             |
| A_68_P30385400 | chr15:82742401-82742445                           | NM_001114140:142    | Tcf20         | INSIDE                 | 0.189                                                        | 1.406                          | 5304.86            | 7456.46            | 0.266                          | 3667.11            | 976.41             |
| A_68_P24153543 | chr5:143578378-143578435                          | NM_001122730:660    | Tnrc18        | INSIDE                 | 0.189                                                        | 0.700                          | 1269.33            | 888.91             | 0.132                          | 874.65             | 115.63             |
| A_68_P29560572 | chr14:41780482-41780526                           | NM_145928-408       | Tspan14       | PROMOTER               | 0.189                                                        | 0.561                          | 1341.96            | 753.37             | 0.106                          | 1101.77            | 117.12             |
| A_68_P20421183 | chr1:89905073-89905117                            | NM_001033291:32     | Usp40         | INSIDE                 | 0.189                                                        | 0.702                          | 3735.32            | 2620.52            | 0.133                          | 2823.27            | 374.41             |
| A_68_P24955199 | chr7:6335923-6335967                              | NM_175247-83        | Zfp28         | PROMOTER               | 0.189                                                        | 0.472                          | 1659.57            | 783.58             | 0.089                          | 1335.68            | 119.43             |
| A_68_P24983045 | A_68_P24983045                                    |                     | Unknown       |                        | 0.189                                                        | 2.173                          | 3061.50            | 6653.77            | 0.411                          | 2107.60            | 911.02             |
| A_68_P31183534 | chr17:42453113-42453157                           | NM_028474:239       | 3110082D06Rik | INSIDE                 | 0.188                                                        | 1.500                          | 2124.97            | 3186.90            | 0.282                          | 1389.09            | 391.23             |
| A_68_P22407410 | chr3:107399288-107399333                          | NM_007441:1362      | Alx3          | INSIDE                 | 0.188                                                        | 0.471                          | 2328.02            | 1097.46            | 0.089                          | 1540.32            | 136.72             |
| A_68_P23440735 | chr4:155186739-155186783                          | NM_020768:163       | Cenl2         | INSIDE                 | 0.188                                                        | 0.500                          | 4519.25            | 2258.53            | 0.094                          | 3204.71            | 300.89             |
| A_68_P23400905 | chr4:148892711-148892755                          | NM_023465:383       | Ctnnbip1      | INSIDE                 | 0.188                                                        | 0.664                          | 2722.42            | 1808.01            | 0.125                          | 2067.79            | 257.58             |
| A_68_P29056203 | chr13:55736834-55736882                           | NM_145975:471       | Ddx46         | INSIDE                 | 0.188                                                        | 0.572                          | 1555.52            | 889.72             | 0.107                          | 1118.25            | 120.08             |
| A_68_P25009064 | chr7:26004847-26004897                            | NM_020767:6         | Dedd2         | INSIDE                 | 0.188                                                        | 0.446                          | 2132.53            | 951.36             | 0.084                          | 1541.43            | 129.58             |
| A_68_P26132766 | chr8:107813805-107813857                          | NM_177788:6168      | Exoc3l        | INSIDE                 | 0.188                                                        | 0.666                          | 1471.32            | 979.44             | 0.125                          | 948.32             | 118.81             |
| A_68_P27835269 | chr11:58990423-58990467                           | NM_175452:5884      | Gjc2          | INSIDE                 | 0.188                                                        | 0.538                          | 1437.85            | 773.29             | 0.101                          | 1179.38            | 119.00             |
| A_68_P28080240 | chr11:102417615-102417659                         | NM_001159492-164    | Gpatch8       | PROMOTER               | 0.188                                                        | 0.733                          | 2111.17            | 1546.99            | 0.138                          | 1590.26            | 219.47             |
| A_68_P25095367 | chr7:53085924-53085970                            | NM_153419:213       | Grwd1         | INSIDE                 | 0.188                                                        | 0.503                          | 2503.33            | 1260.16            | 0.095                          | 1743.64            | 165.37             |
| A_68_P28269098 | chr12:17183229-17183273                           | NM_201531:444       | Kenf1         | INSIDE                 | 0.188                                                        | 0.579                          | 2611.73            | 1511.42            | 0.109                          | 1961.17            | 213.40             |
| A_68_P24117834 | chr5:136255023-136255074                          | NM_008617:530       | Mdh2          | INSIDE                 | 0.188                                                        | 0.531                          | 1482.95            | 787.91             | 0.100                          | 1213.50            | 121.36             |
| A_68_P23188357 | chr4:106739700-106739748                          | NM_025500-253       | Mrp137        | DIVERGENT_PROMOTER     | 0.188                                                        | 0.589                          | 1769.24            | 1042.63            | 0.111                          | 1397.62            | 154.83             |
| A_68_P23134122 | chr4:97412574-97412618                            | NM_001122952:163963 | Nfia          | INSIDE                 | 0.188                                                        | 0.361                          | 2286.25            | 825.06             | 0.068                          | 1694.82            | 114.91             |
| A_68_P31201773 | chr17:45692924-45692968                           | NM_008690:282       | Nfkbe         | INSIDE                 | 0.188                                                        | 0.472                          | 1942.55            | 917.53             | 0.089                          | 1348.68            | 119.77             |
| A_68_P26460523 | chr9:43047879-43047923                            | NM_178644-1         | Oaf           | PROMOTER               | 0.188                                                        | 0.422                          | 2116.38            | 893.93             | 0.079                          | 1577.08            | 125.36             |
| A_68_P20927660 | chr1:191552263-191552307                          | NM_008976:138       | Ptpn14        | INSIDE                 | 0.188                                                        | 0.720                          | 1453.97            | 1046.44            | 0.135                          | 1248.33            | 168.54             |
| A_68_P21142143 | chr2:37298714-37298758                            | NM_146121-68        | Rabgap1       | DIVERGENT_PROMOTER     | 0.188                                                        | 0.570                          | 1347.67            | 767.67             | 0.107                          | 1132.51            | 121.25             |
| A_68_P32575425 | chrX:101176563-101176615                          | NM_011276:35        | Rlim          | INSIDE                 | 0.188                                                        | 1.645                          | 907.54             | 1493.05            | 0.310                          | 399.65             | 123.90             |
| A_68_P30013954 | chr15:10965913-10965957                           | NM_178717:1789      | Rxfp3         | INSIDE                 | 0.188                                                        | 0.711                          | 1397.06            | 992.87             | 0.133                          | 1076.55            | 143.56             |
| A_68_P29904270 | chr14:112074911-112074955                         | NM_198865:596       | Slitrk5       | INSIDE                 | 0.188                                                        | 0.529                          | 1531.50            | 810.51             | 0.100                          | 1155.28            | 115.06             |
| A_68_P20218132 | chr1:50984895-50984939                            | NM_019790:550       | Tmeff2        | INSIDE                 | 0.188                                                        | 0.533                          | 1535.11            | 818.16             | 0.100                          | 1207.67            | 121.27             |
| A_68_P22129252 | chr3:51163003-51163047                            |                     | Unknown       |                        | 0.188                                                        | 0.492                          | 1591.22            | 782.83             | 0.092                          | 1280.43            | 118.14             |
| A_68_P31759410 | chr18:61886034-61886078                           | NR_029432:13        | 1500015A07Rik | INSIDE                 | 0.187                                                        | 0.441                          | 1836.90            | 809.51             | 0.083                          | 1401.31            | 115.76             |
| A_68_P32710884 | chrX:139400658-139400702                          | NM_019496:591       | Ammecr1       | INSIDE                 | 0.187                                                        | 2.202                          | 1850.91            | 4076.51            | 0.412                          | 808.53             | 333.31             |
| A_68_P25123372 | chr7:58766676-58766720                            | NM_177694:300       | Ano5          | INSIDE                 | 0.187                                                        | 0.542                          | 1536.46            | 832.27             | 0.101                          | 1188.28            | 120.37             |
| A_68_P31102615 | chr17:25392896-25392940                           | NM_001163270:391    | Baiap3        | INSIDE                 | 0.187                                                        | 0.710                          | 1736.49            | 1232.94            | 0.133                          | 1359.67            | 180.28             |



| ProbeName      | Target position of probe on CpG island microarray | TargetID           | GeneSymbol    | CpG island Description | Ratio of relative methylation (TiO <sub>2</sub> -NP/Vehicle) | Sham group                     |                    |                    | TiO <sub>2</sub> -H group      |                    |                    |
|----------------|---------------------------------------------------|--------------------|---------------|------------------------|--------------------------------------------------------------|--------------------------------|--------------------|--------------------|--------------------------------|--------------------|--------------------|
|                |                                                   |                    |               |                        |                                                              | Relative methylation (Cy5/Cy3) | Cy3 signal (Input) | Cy5 signal (MeDIP) | Relative methylation (Cy5/Cy3) | Cy3 signal (Input) | Cy5 signal (MeDIP) |
| A_68_P21564939 | chr2:118424101-118424145                          | NM_009773:176      | Bub1b         | INSIDE                 | 0.187                                                        | 2.521                          | 1635.60            | 4123.18            | 0.471                          | 1037.77            | 488.62             |
| A_68_P32385503 | chrX:50410575-50410619                            | NR_038184:-229     | C430049B03Rik | PROMOTER               | 0.187                                                        | 2.036                          | 3303.44            | 6726.82            | 0.380                          | 1329.00            | 505.02             |
| A_68_P23240385 | chr4:118109464-118109508                          | NM_023223:462      | Cdc20         | INSIDE                 | 0.187                                                        | 0.679                          | 1416.43            | 961.24             | 0.127                          | 921.42             | 117.20             |
| A_68_P20149809 | chr1:36748265-36748309                            | NM_009942:-45      | Cox5b         | DIVERGENT_PROMOTER     | 0.187                                                        | 0.599                          | 1609.22            | 963.51             | 0.112                          | 1236.80            | 138.80             |
| A_68_P31838819 | chr18:75856123-75856171                           | NM_201354:1204     | Ctcf          | INSIDE                 | 0.187                                                        | 0.587                          | 1597.47            | 937.31             | 0.110                          | 1322.73            | 145.18             |
| A_68_P28176851 | chr11:119129170-119129216                         | NM_001159324:-88   | Gaa           | PROMOTER               | 0.187                                                        | 0.682                          | 1293.27            | 881.53             | 0.128                          | 962.50             | 122.97             |
| A_68_P32090696 | chr19:36628500-36628544                           | NM_001163471:-606  | Hectd2        | PROMOTER               | 0.187                                                        | 0.620                          | 3761.43            | 2332.90            | 0.116                          | 2595.28            | 301.48             |
| A_68_P29604764 | chr14:52723955-52723999                           | NM_001170981:-273  | HnrnpC        | DIVERGENT_PROMOTER     | 0.187                                                        | 0.538                          | 1609.29            | 865.54             | 0.100                          | 1215.71            | 122.11             |
| A_68_P23019857 | chr4:73898113-73898157                            | NM_144787:352      | Kdm4c         | INSIDE                 | 0.187                                                        | 0.580                          | 1672.21            | 970.40             | 0.109                          | 1586.42            | 172.49             |
| A_68_P32147204 | chr19:47090203-47090247                           | NM_001164363:-545  | Nt5c2         | PROMOTER               | 0.187                                                        | 0.710                          | 1808.50            | 1284.59            | 0.133                          | 1471.62            | 195.03             |
| A_68_P30424871 | chr15:89208941-89208985                           | NM_001013022:723   | Odf3b         | INSIDE                 | 0.187                                                        | 1.450                          | 2442.21            | 3540.10            | 0.271                          | 1608.19            | 435.68             |
| A_68_P21853418 | chr2:170322093-170322137                          | NM_001013369:187   | Pfdn4         | INSIDE                 | 0.187                                                        | 0.465                          | 1684.48            | 783.27             | 0.087                          | 1350.47            | 117.58             |
| A_68_P25093689 | chr7:52793682-52793726                            | NM_148927:12005    | Plekha4       | INSIDE                 | 0.187                                                        | 0.630                          | 1765.63            | 1112.17            | 0.118                          | 1337.90            | 157.64             |
| A_68_P26825470 | chr9:110629961-110630005                          | NM_001083936:15132 | Phf1r         | INSIDE                 | 0.187                                                        | 1.773                          | 1441.41            | 2556.16            | 0.332                          | 951.18             | 316.00             |
| A_68_P24464121 | chr6:54516133-54516177                            | NM_027268:222      | Scrn1         | INSIDE                 | 0.187                                                        | 0.562                          | 1461.21            | 820.71             | 0.105                          | 1132.37            | 119.20             |
| A_68_P21986756 | chr3:21974577-21974636                            | NM_030732:-967     | Tbl1xrl1      | PROMOTER               | 0.187                                                        | 0.445                          | 1879.65            | 836.66             | 0.083                          | 1462.30            | 122.04             |
| A_68_P26347560 | chr9:21314771-21314829                            | NM_010744:-170     | Tmed1         | PROMOTER               | 0.187                                                        | 0.661                          | 1363.31            | 901.58             | 0.124                          | 965.41             | 119.26             |
| A_68_P27357055 | chr10:93498582-93498626                           | NM_172538:-111     | Vezt          | DIVERGENT_PROMOTER     | 0.187                                                        | 0.591                          | 3740.14            | 2209.91            | 0.111                          | 2827.06            | 313.16             |
| A_68_P21568805 | chr2:119114248-119114292                          | NM_172269:-207     | Vps18         | PROMOTER               | 0.187                                                        | 0.463                          | 1877.48            | 869.97             | 0.086                          | 1371.56            | 118.54             |
| A_68_P21424293 | chr2:91570286-91570331                            | NM_001080754:14    | Ambra1        | INSIDE                 | 0.186                                                        | 0.427                          | 1821.53            | 777.97             | 0.079                          | 1444.12            | 114.72             |
| A_68_P31834412 | chr18:75165713-75165757                           | NM_001001181:181   | BC031181      | INSIDE                 | 0.186                                                        | 0.627                          | 2602.69            | 1632.91            | 0.117                          | 1798.45            | 210.31             |
| A_68_P28743715 | chr12:112615120-112615164                         | NM_183016:787      | Cdc42bbp      | INSIDE                 | 0.186                                                        | 0.463                          | 2455.96            | 1138.12            | 0.086                          | 1861.06            | 160.55             |
| A_68_P25045001 | chr7:35460951-35460995                            | NM_175140:136758   | Chst8         | INSIDE                 | 0.186                                                        | 0.663                          | 1687.40            | 1119.33            | 0.123                          | 1184.68            | 145.82             |
| A_68_P25351869 | chr7:104845090-104845134                          | NM_023671:-88      | Clns1a        | PROMOTER               | 0.186                                                        | 0.648                          | 1149.10            | 745.08             | 0.120                          | 978.81             | 117.90             |
| A_68_P21489013 | chr2:104249944-104249988                          | NM_001033347:525   | D430041D05Rik | INSIDE                 | 0.186                                                        | 0.631                          | 2467.55            | 1556.27            | 0.117                          | 1679.45            | 196.91             |
| A_68_P22903297 | chr4:49072600-49072644                            | NM_178756:289      | E130309F12Rik | INSIDE                 | 0.186                                                        | 0.542                          | 1581.49            | 857.66             | 0.101                          | 1224.29            | 123.30             |
| A_68_P30580078 | chr16:18498994-18499038                           | NM_023120:53       | Gnb1l         | INSIDE                 | 0.186                                                        | 0.349                          | 2572.54            | 898.62             | 0.065                          | 2048.72            | 133.31             |
| A_68_P21077788 | chr2:26171431-26171475                            | NM_001199147:-3837 | Gpsm1         | PROMOTER               | 0.186                                                        | 0.695                          | 2432.36            | 1691.13            | 0.130                          | 1639.41            | 212.31             |
| A_68_P32777675 | chrX:156426686-156426730                          | NM_001163085:344   | Map3k15       | INSIDE                 | 0.186                                                        | 1.497                          | 772.35             | 1155.89            | 0.278                          | 431.33             | 119.92             |
| A_68_P23154636 | chr4:101028607-101028651                          | NR_029537:-8996    | Mir101a       | PROMOTER               | 0.186                                                        | 0.564                          | 3032.52            | 1710.82            | 0.105                          | 2193.25            | 230.68             |
| A_68_P20227604 | chr1:52556860-52556904                            | NM_008667:410      | Nab1          | INSIDE                 | 0.186                                                        | 0.483                          | 2120.26            | 1025.04            | 0.090                          | 1499.80            | 135.05             |
| A_68_P24595553 | chr6:83745392-83745436                            | NM_001164187:263   | Nagk          | INSIDE                 | 0.186                                                        | 0.681                          | 1256.74            | 855.76             | 0.127                          | 922.81             | 116.90             |
| A_68_P23419143 | chr4:151852331-151852375                          | NM_153424:102      | Nphp4         | INSIDE                 | 0.186                                                        | 0.687                          | 2407.37            | 1653.22            | 0.128                          | 1760.58            | 225.08             |
| A_68_P29057342 | chr13:55937765-55937809                           | NM_011097:-5000    | Pitx1         | PROMOTER               | 0.186                                                        | 0.583                          | 1825.86            | 1064.61            | 0.109                          | 1410.67            | 153.31             |
| A_68_P27756338 | chr11:44332144-44332188                           | NM_028862:-299     | Rnf145        | PROMOTER               | 0.186                                                        | 0.637                          | 1078.96            | 687.45             | 0.119                          | 1001.17            | 118.78             |
| A_68_P31411737 | chr17:86017485-86017529                           | NR_038085:230      | Six3os1       | INSIDE                 | 0.186                                                        | 0.508                          | 1666.57            | 847.22             | 0.094                          | 1286.03            | 121.31             |
| A_68_P28161648 | chr11:116714471-116714515                         | NM_011358:-84      | Srsf2         | DIVERGENT_PROMOTER     | 0.186                                                        | 0.551                          | 1366.73            | 753.46             | 0.102                          | 1158.23            | 118.49             |
| A_68_P20530741 | chr1:114313355-114313399                          |                    | Unknown       |                        | 0.186                                                        | 0.498                          | 1817.63            | 905.91             | 0.093                          | 1488.32            | 138.23             |
| A_68_P20061791 | chr1:18048589-18048633                            |                    | Unknown       |                        | 0.186                                                        | 0.695                          | 1281.68            | 891.34             | 0.130                          | 1155.99            | 149.70             |
| A_68_P23589614 | chr5:33882953-33883010                            |                    | Unknown       |                        | 0.186                                                        | 1.359                          | 1757.31            | 2387.80            | 0.253                          | 1195.04            | 302.03             |
| A_68_P31412803 | chr17:86199549-86199593                           | AK142122:348       |               | INSIDE                 | 0.186                                                        | 0.640                          | 4105.14            | 2627.86            | 0.119                          | 3210.72            | 382.80             |
| A_68_P21626549 | chr2:129627707-129627751                          | NR_029452:-533     | 4932416H05Rik | PROMOTER               | 0.185                                                        | 0.590                          | 3038.78            | 1794.00            | 0.109                          | 2191.57            | 239.36             |
| A_68_P31152204 | chr17:34255264-34255308                           | NR_037970:1559     | Brd2          | INSIDE                 | 0.185                                                        | 1.665                          | 5401.10            | 8995.19            | 0.308                          | 3536.85            | 1090.15            |
| A_68_P25011514 | chr7:26503814-26503858                            | NM_028771:236      | Ccdc97        | INSIDE                 | 0.185                                                        | 0.624                          | 1508.25            | 941.49             | 0.116                          | 1041.96            | 120.40             |
| A_68_P26406181 | chr9:32353158-32353202                            | NM_008026:-4227    | Fhl1          | PROMOTER               | 0.185                                                        | 0.460                          | 1778.13            | 818.45             | 0.085                          | 1447.37            | 123.32             |
| A_68_P24992574 | chr7:19890287-19890331                            | NM_008036:5086     | Fosb          | INSIDE                 | 0.185                                                        | 0.518                          | 2361.03            | 1223.60            | 0.096                          | 1677.33            | 160.66             |
| A_68_P30513459 | chr16:5049380-5049424                             | NM_001079814:601   | Glyr1         | INSIDE                 | 0.185                                                        | 0.385                          | 2033.48            | 782.98             | 0.071                          | 1603.69            | 114.32             |
| A_68_P25727980 | chr8:26707531-26707578                            | NM_173012:405      | Ltm2          | INSIDE                 | 0.185                                                        | 0.690                          | 1228.19            | 846.90             | 0.128                          | 992.94             | 127.01             |
| A_68_P29696151 | chr14:70009216-70009260                           | NM_033325:-44      | Loxl2         | PROMOTER               | 0.185                                                        | 0.694                          | 2406.26            | 1671.06            | 0.128                          | 1801.19            | 231.32             |
| A_68_P23192855 | chr4:107476214-107476258                          | NM_001080926:1373  | Lrp8          | INSIDE                 | 0.185                                                        | 0.344                          | 2441.43            | 840.11             | 0.064                          | 1828.68            | 116.58             |
| A_68_P20440041 | chr1:92949532-92949576                            | NM_001111311:-466  | Lrrfip1       | PROMOTER               | 0.185                                                        | 0.693                          | 1236.30            | 856.88             | 0.128                          | 963.01             | 123.18             |

| ProbeName      | Target position of probe on CpG island microarray | TargetID                 | GeneSymbol    | CpG island Description | Ratio of relative methylation (TiO <sub>2</sub> -NP/Vehicle) | Sham group                     |                    |                    | TiO <sub>2</sub> -H group      |                    |                    |
|----------------|---------------------------------------------------|--------------------------|---------------|------------------------|--------------------------------------------------------------|--------------------------------|--------------------|--------------------|--------------------------------|--------------------|--------------------|
|                |                                                   |                          |               |                        |                                                              | Relative methylation (Cy5/Cy3) | Cy3 signal (Input) | Cy5 signal (MeDIP) | Relative methylation (Cy5/Cy3) | Cy3 signal (Input) | Cy5 signal (MeDIP) |
| A_68_P24993425 | chr7:20043646-20043690                            | NM_172279:175            | Mark4         | INSIDE                 | 0.185                                                        | 2.249                          | 10218.67           | 22985.36           | 0.415                          | 6641.72            | 2756.53            |
| A_68_P30557334 | chr16:13448585-13448633                           | NR_030549:-1007          | Mir193b       | PROMOTER               | 0.185                                                        | 0.700                          | 1281.65            | 897.45             | 0.129                          | 931.67             | 120.61             |
| A_68_P22310708 | chr3:87723736-87723780                            | NM_026591:293            | Mrp124        | INSIDE                 | 0.185                                                        | 0.613                          | 1347.00            | 826.36             | 0.113                          | 1023.99            | 116.13             |
| A_68_P24819300 | chr6:125141938-125141982                          | NM_025595:-257           | Mrp151        | DIVERGENT_PROMOTER     | 0.185                                                        | 0.667                          | 1176.60            | 784.24             | 0.124                          | 953.32             | 117.85             |
| A_68_P25144264 | chr7:63217409-63217453                            | NM_023647:390            | Nipa2         | INSIDE                 | 0.185                                                        | 0.625                          | 1332.57            | 832.52             | 0.115                          | 1047.59            | 120.90             |
| A_68_P22880641 | chr4:45031688-45031732                            | NM_022811:214            | Poir1c        | INSIDE                 | 0.185                                                        | 0.492                          | 1716.64            | 844.91             | 0.091                          | 1324.33            | 120.69             |
| A_68_P29612846 | chr14:55136095-55136139                           | NM_013768:191            | Prmt5         | INSIDE                 | 0.185                                                        | 0.554                          | 1520.75            | 842.86             | 0.102                          | 1203.87            | 123.19             |
| A_68_P28071923 | chr11:100956472-100956516                         | NM_008949:221            | Psmc3ip       | INSIDE                 | 0.185                                                        | 0.690                          | 1160.43            | 800.63             | 0.127                          | 903.95             | 115.20             |
| A_68_P30436281 | chr15:91402869-91402913                           | NM_001033633:802         | Slc2a13       | INSIDE                 | 0.185                                                        | 0.441                          | 1931.15            | 851.47             | 0.081                          | 1457.54            | 118.77             |
| A_68_P26579680 | chr9:63870057-63870101                            | NM_008542:-212           | Smad6         | PROMOTER               | 0.185                                                        | 0.547                          | 2258.91            | 1236.31            | 0.101                          | 1610.69            | 162.89             |
| A_68_P25725927 | chr8:26311587-26311631                            | NM_177089:313            | Tacc1         | INSIDE                 | 0.185                                                        | 0.387                          | 2292.71            | 887.34             | 0.072                          | 1693.11            | 121.27             |
| A_68_P27971715 | chr11:83286236-83286295                           | NM_027427:-344           | Taf15         | DIVERGENT_PROMOTER     | 0.185                                                        | 0.604                          | 1459.98            | 881.99             | 0.112                          | 1097.66            | 122.81             |
| A_68_P31096074 | chr17:24345798-24345842                           | NM_001163847:-3313       | Tbc1d24       | PROMOTER               | 0.185                                                        | 0.625                          | 1172.76            | 733.37             | 0.115                          | 1013.58            | 116.95             |
| A_68_P28988731 | chr13:43267019-43267063                           | NM_025935:-312           | Tbc1d7        | PROMOTER               | 0.185                                                        | 0.602                          | 1345.41            | 809.27             | 0.112                          | 1080.68            | 120.50             |
| A_68_P26564385 | chr9:61220827-61220871                            | NM_001083927:676         | Tle3          | INSIDE                 | 0.185                                                        | 0.471                          | 1635.56            | 770.05             | 0.087                          | 1315.33            | 114.78             |
| A_68_P24459340 | chr6:53769060-53769104                            | NM_025817:1737           | Tril          | INSIDE                 | 0.185                                                        | 0.613                          | 4396.63            | 2697.18            | 0.114                          | 2944.14            | 334.33             |
| A_68_P21767075 | chr2:155517577-155517621                          | NM_001163452:522         | Trpc4ap       | INSIDE                 | 0.185                                                        | 0.745                          | 5254.94            | 3915.07            | 0.137                          | 3538.16            | 486.40             |
| A_68_P30423271 | chr15:88953473-88953517                           | NM_001163319:86          | Tubgcp6       | INSIDE                 | 0.185                                                        | 2.593                          | 4119.29            | 10679.64           | 0.481                          | 2792.71            | 1342.48            |
| A_68_P26494148 | chr9:48643704-48643758                            | NM_001033324:320         | Zbtb16        | INSIDE                 | 0.185                                                        | 0.589                          | 1411.78            | 832.08             | 0.109                          | 1080.11            | 117.65             |
| A_68_P25618384 | chr8:4677768-4677812                              | ENSMUST00000058918:575   |               | INSIDE                 | 0.185                                                        | 0.445                          | 2334.04            | 1038.68            | 0.082                          | 1835.44            | 151.18             |
| A_68_P25261708 | chr7:86681223-86681267                            | ENSMUST00000141822:36242 |               | DOWNSTREAM             | 0.185                                                        | 0.680                          | 1427.15            | 970.40             | 0.126                          | 1230.80            | 155.20             |
| A_68_P25961390 | chr8:74967839-74967883                            | NM_028170:82             | 1700030K09Rik | INSIDE                 | 0.184                                                        | 1.398                          | 2528.19            | 3534.89            | 0.257                          | 1772.52            | 456.11             |
| A_68_P21112312 | chr2:31805862-31805906                            | NM_145144:62             | Aif1l         | INSIDE                 | 0.184                                                        | 0.505                          | 1702.28            | 859.54             | 0.093                          | 1254.23            | 116.52             |
| A_68_P28739136 | chr12:111829407-111829460                         | NR_033340:-150           | B930059L03Rik | PROMOTER               | 0.184                                                        | 0.461                          | 1918.56            | 884.50             | 0.085                          | 1387.78            | 117.67             |
| A_68_P24920736 | chr6:144996969-144997013                          | NM_001024468:342         | Beat1         | INSIDE                 | 0.184                                                        | 0.610                          | 3431.78            | 2091.70            | 0.112                          | 2598.47            | 292.15             |
| A_68_P23366007 | chr4:141349370-141349414                          | NM_015733:-134           | Casp9         | DIVERGENT_PROMOTER     | 0.184                                                        | 1.354                          | 4764.33            | 6450.46            | 0.249                          | 3352.77            | 836.26             |
| A_68_P28175801 | chr11:118952251-118952295                         | NM_007625:-4721          | Cbx4          | PROMOTER               | 0.184                                                        | 0.488                          | 2060.99            | 1006.73            | 0.090                          | 1576.34            | 141.99             |
| A_68_P30381575 | chr15:81958547-81958591                           | NM_172428:217            | Ccdc134       | INSIDE                 | 0.184                                                        | 0.688                          | 2056.79            | 1414.21            | 0.126                          | 1528.30            | 193.02             |
| A_68_P20148456 | chr1:36528653-36528697                            | NM_033570:233            | Cnnm4         | INSIDE                 | 0.184                                                        | 0.572                          | 1630.07            | 932.58             | 0.105                          | 1172.89            | 123.35             |
| A_68_P28099221 | chr11:105898542-105898586                         | NM_027946:379            | Deaf7         | INSIDE                 | 0.184                                                        | 0.534                          | 1674.37            | 894.36             | 0.098                          | 1210.96            | 119.27             |
| A_68_P26221252 | chr8:123113160-123113204                          | NM_178856:-207           | Gins2         | PROMOTER               | 0.184                                                        | 0.648                          | 3138.23            | 2033.78            | 0.119                          | 2273.75            | 271.27             |
| A_68_P30404764 | chr15:85888808-85888852                           | NM_001205353:-326        | Gramd4        | PROMOTER               | 0.184                                                        | 0.509                          | 1718.53            | 875.47             | 0.094                          | 1288.34            | 121.02             |
| A_68_P24449462 | chr6:52203025-52203069                            | NR_015348:7805           | Hoxa11as      | DOWNSTREAM             | 0.184                                                        | 0.480                          | 2973.37            | 1425.96            | 0.088                          | 2472.11            | 218.04             |
| A_68_P22403737 | chr3:106839605-106839649                          | NM_008418:547            | Kena3         | INSIDE                 | 0.184                                                        | 0.548                          | 3062.15            | 1679.45            | 0.101                          | 2124.46            | 214.84             |
| A_68_P32095251 | chr19:37450692-37450736                           | NM_010615:-178           | Kif11         | PROMOTER               | 0.184                                                        | 0.513                          | 3322.40            | 1705.44            | 0.095                          | 2397.48            | 226.61             |
| A_68_P24038671 | chr5:120881905-120881949                          | NM_008499:32             | Lhx5          | INSIDE                 | 0.184                                                        | 0.728                          | 1770.78            | 1289.00            | 0.134                          | 1363.93            | 182.33             |
| A_68_P28377241 | chr12:40949707-40949751                           | NR_035459:-330           | Mir1938       | PROMOTER               | 0.184                                                        | 0.548                          | 1762.34            | 966.09             | 0.101                          | 1301.25            | 131.05             |
| A_68_P22082999 | chr3:40886268-40886325                            | NM_027558:672            | Pgrmc2        | INSIDE                 | 0.184                                                        | 0.576                          | 1627.36            | 937.55             | 0.106                          | 1189.47            | 126.33             |
| A_68_P22488128 | chr3:123149644-123149696                          | NM_008939:-160           | Prss12        | PROMOTER               | 0.184                                                        | 0.674                          | 1356.81            | 913.87             | 0.124                          | 975.11             | 120.81             |
| A_68_P25842224 | chr8:48619355-48619399                            | NM_203507:378            | Rwdd4a        | INSIDE                 | 0.184                                                        | 0.430                          | 2782.07            | 1197.41            | 0.079                          | 2011.19            | 159.67             |
| A_68_P21081136 | chr2:26772191-26772235                            | NM_013677:-162           | Surf1         | PROMOTER               | 0.184                                                        | 0.553                          | 2078.85            | 1149.54            | 0.102                          | 1443.85            | 147.07             |
| A_68_P27944034 | chr11:78364333-78364383                           | NM_133706:-121           | Tmem97        | PROMOTER               | 0.184                                                        | 0.628                          | 1454.68            | 913.75             | 0.115                          | 1053.69            | 121.58             |
| A_68_P21652099 | chr2:134469945-134469989                          | NM_029148:-109           | Tmx4          | PROMOTER               | 0.184                                                        | 0.575                          | 1436.16            | 825.16             | 0.106                          | 1144.01            | 121.00             |
| A_68_P25500779 | chr7:133631050-133631094                          | NM_001163713:204         | Tufm          | INSIDE                 | 0.184                                                        | 0.520                          | 1427.60            | 741.82             | 0.095                          | 1224.95            | 116.81             |
| A_68_P22398702 | chr3:105508064-105508108                          | NM_001163356:-289        | 6530418L21Rik | PROMOTER               | 0.183                                                        | 0.382                          | 1991.05            | 759.84             | 0.070                          | 1677.78            | 117.45             |
| A_68_P27179599 | chr10:60735806-60735850                           | NM_001081127:358         | Adams14       | INSIDE                 | 0.183                                                        | 0.700                          | 2886.75            | 2021.85            | 0.128                          | 2179.58            | 278.88             |
| A_68_P26569979 | chr9:62192471-62192515                            | NM_009672:3343           | Anp32a        | INSIDE                 | 0.183                                                        | 0.455                          | 1803.17            | 820.29             | 0.083                          | 1410.16            | 117.37             |
| A_68_P24864239 | chr6:134871088-134871141                          | NM_009875:696            | Cdkn1b        | INSIDE                 | 0.183                                                        | 0.513                          | 2205.53            | 1131.37            | 0.094                          | 1269.46            | 119.28             |
| A_68_P21569217 | chr2:119176751-119176795                          | NM_026929:-205           | Chac1         | PROMOTER               | 0.183                                                        | 0.519                          | 1593.16            | 826.99             | 0.095                          | 1215.22            | 115.31             |
| A_68_P22319260 | chr3:89222015-89222059                            | NM_016904:177            | Cks1b         | INSIDE                 | 0.183                                                        | 1.871                          | 3134.04            | 5864.79            | 0.343                          | 2010.64            | 689.92             |
| A_68_P21740704 | chr2:150574793-150574837                          | NM_172117:-2             | Entpd6        | PROMOTER               | 0.183                                                        | 0.432                          | 1946.95            | 841.04             | 0.079                          | 1573.74            | 124.63             |

| ProbeName      | Target position of probe on CpG island microarray | TargetID           | GeneSymbol    | CpG island Description | Ratio of relative methylation (TiO <sub>2</sub> -NP/Vehicle) | Sham group                     |                    |                    | TiO <sub>2</sub> -H group      |                    |                    |
|----------------|---------------------------------------------------|--------------------|---------------|------------------------|--------------------------------------------------------------|--------------------------------|--------------------|--------------------|--------------------------------|--------------------|--------------------|
|                |                                                   |                    |               |                        |                                                              | Relative methylation (Cy5/Cy3) | Cy3 signal (Input) | Cy5 signal (MeDIP) | Relative methylation (Cy5/Cy3) | Cy3 signal (Input) | Cy5 signal (MeDIP) |
| A_68_P28242247 | chr12:12269223-12269267                           | NM_001146119:300   | Fam49a        | INSIDE                 | 0.183                                                        | 0.696                          | 1504.27            | 1046.98            | 0.128                          | 1023.11            | 130.56             |
| A_68_P29055029 | chr13:55547182-55547226                           | NM_011938:510      | Grk6          | INSIDE                 | 0.183                                                        | 0.473                          | 1651.20            | 780.85             | 0.087                          | 1384.51            | 119.97             |
| A_68_P30130468 | chr15:34767120-34767164                           | NM_181317:7        | Kens2         | INSIDE                 | 0.183                                                        | 0.442                          | 1909.65            | 844.39             | 0.081                          | 1400.70            | 113.65             |
| A_68_P21137825 | chr2:35959267-35959311                            | NM_001083126:292   | Lhx6          | INSIDE                 | 0.183                                                        | 0.726                          | 2268.44            | 1646.77            | 0.133                          | 1756.97            | 233.27             |
| A_68_P31130153 | chr17:29979350-29979394                           | NM_001081160:45455 | Mdga1         | INSIDE                 | 0.183                                                        | 0.619                          | 1900.79            | 1177.29            | 0.113                          | 1366.30            | 154.62             |
| A_68_P26611007 | chr9:69301684-69301728                            | NR_037296:-3044    | Mir3109       | PROMOTER               | 0.183                                                        | 0.550                          | 1407.39            | 774.53             | 0.101                          | 1161.21            | 116.77             |
| A_68_P27536461 | chr10:126972343-126972387                         | NM_183297:-749     | Nxph4         | PROMOTER               | 0.183                                                        | 0.538                          | 2326.13            | 1251.91            | 0.098                          | 1517.35            | 149.09             |
| A_68_P21495905 | chr2:105509058-105509107                          | NR_002867:1405     | Pax6os1       | INSIDE                 | 0.183                                                        | 0.725                          | 1950.25            | 1414.48            | 0.133                          | 1395.68            | 185.05             |
| A_68_P24873768 | chr6:136610320-136610368                          | NM_025806:70       | Plbd1         | INSIDE                 | 0.183                                                        | 0.594                          | 1276.49            | 757.71             | 0.109                          | 1089.98            | 118.30             |
| A_68_P21913222 | chr2:181599335-181599379                          | NM_025901:292      | Polr3k        | INSIDE                 | 0.183                                                        | 0.588                          | 1352.22            | 794.67             | 0.108                          | 1083.96            | 116.61             |
| A_68_P21077271 | chr2:26092393-26092439                            | NM_153559:524      | Qsox2         | INSIDE                 | 0.183                                                        | 0.644                          | 1176.75            | 758.17             | 0.118                          | 989.76             | 116.45             |
| A_68_P31925256 | chr19:4811668-4811714                             | NM_019869:-56      | Rbm14         | PROMOTER               | 0.183                                                        | 0.522                          | 1427.01            | 744.50             | 0.096                          | 1211.67            | 115.81             |
| A_68_P29011796 | chr13:47217864-47217923                           | NM_146042:-195     | Rnf144b       | PROMOTER               | 0.183                                                        | 0.549                          | 1568.74            | 861.46             | 0.101                          | 1200.27            | 120.67             |
| A_68_P28578485 | chr12:82046655-82046699                           | NM_001079694:186   | Srsf5         | INSIDE                 | 0.183                                                        | 0.392                          | 2396.97            | 939.51             | 0.072                          | 1897.39            | 136.07             |
| A_68_P22492342 | chr3:124024204-124024248                          | NM_146140:272      | Tram111       | INSIDE                 | 0.183                                                        | 0.634                          | 1498.47            | 949.44             | 0.116                          | 1189.22            | 138.15             |
| A_68_P26345606 | chr9:20935934-20935978                            | NM_001205312:-237  | Tyk2          | PROMOTER               | 0.183                                                        | 0.523                          | 2169.75            | 1135.59            | 0.096                          | 1687.23            | 161.85             |
| A_68_P25717772 | chr8:24780109-24780156                            | NM_177086:0        | Zmat4         | INSIDE                 | 0.183                                                        | 0.708                          | 1720.10            | 1217.42            | 0.130                          | 1233.41            | 160.02             |
| A_68_P20551799 | chr1:120356444-120356488                          | NR_027901:-624     | 2900060B14Rik | PROMOTER               | 0.182                                                        | 0.680                          | 2315.07            | 1575.21            | 0.124                          | 1653.86            | 204.26             |
| A_68_P23588492 | chr5:33721019-33721068                            | NM_001081101:-301  | 4933407H18Rik | PROMOTER               | 0.182                                                        | 0.576                          | 1422.67            | 818.82             | 0.105                          | 1132.97            | 118.89             |
| A_68_P21766024 | chr2:155343697-155343741                          | NM_019811:-60      | Acss2         | DIVERGENT_PROMOTER     | 0.182                                                        | 0.528                          | 1762.34            | 931.09             | 0.096                          | 1473.68            | 141.61             |
| A_68_P23599454 | chr5:35621406-35621450                            | NM_007418:214      | Adra2c        | INSIDE                 | 0.182                                                        | 0.553                          | 1598.51            | 883.50             | 0.100                          | 1161.96            | 116.66             |
| A_68_P29575951 | chr14:47006999-47007043                           | NM_007554:3254     | Bmp4          | INSIDE                 | 0.182                                                        | 0.556                          | 2634.16            | 1465.46            | 0.101                          | 2039.64            | 206.07             |
| A_68_P25458764 | chr7:125676519-125676570                          | NM_009940:283      | Coq7          | INSIDE                 | 0.182                                                        | 0.621                          | 1310.99            | 813.62             | 0.113                          | 1035.79            | 116.70             |
| A_68_P24600308 | chr6:84539342-84539397                            | NM_175475:4435     | Cyp26b1       | INSIDE                 | 0.182                                                        | 0.694                          | 1167.85            | 811.02             | 0.126                          | 958.11             | 120.98             |
| A_68_P27795128 | chr11:51463862-51463906                           | NR_027958:-571     | D930048N14Rik | PROMOTER               | 0.182                                                        | 0.468                          | 1738.94            | 813.16             | 0.085                          | 1365.94            | 116.28             |
| A_68_P21114877 | chr2:32208336-32208380                            | NM_010065:466      | Dnm1          | INSIDE                 | 0.182                                                        | 0.439                          | 2139.13            | 939.13             | 0.080                          | 1545.52            | 123.35             |
| A_68_P25310576 | chr7:97128694-97128740                            | NM_021876:770      | Eed           | INSIDE                 | 0.182                                                        | 0.593                          | 1592.32            | 944.22             | 0.108                          | 1107.26            | 119.66             |
| A_68_P32684275 | chrX:133652900-133652944                          | NM_007957:1943     | Esx1          | INSIDE                 | 0.182                                                        | 1.491                          | 2353.02            | 3509.45            | 0.272                          | 820.08             | 223.06             |
| A_68_P23968454 | chr5:108155866-108155910                          | NM_010278:-2525    | Gfi1          | PROMOTER               | 0.182                                                        | 0.589                          | 2544.34            | 1497.52            | 0.107                          | 1957.54            | 210.20             |
| A_68_P20864292 | chr1:180458491-180458535                          | NM_001161665:-743  | Kif26b        | PROMOTER               | 0.182                                                        | 0.614                          | 1523.68            | 935.46             | 0.112                          | 1084.76            | 121.40             |
| A_68_P31104860 | chr17:25716044-25716088                           | NM_029624:-52      | Lmf1          | DIVERGENT_PROMOTER     | 0.182                                                        | 0.493                          | 1763.91            | 870.04             | 0.090                          | 1406.46            | 126.53             |
| A_68_P21338177 | chr2:74416496-74416545                            | NM_001110209:485   | Lnp           | INSIDE                 | 0.182                                                        | 0.694                          | 1429.85            | 991.99             | 0.126                          | 1201.84            | 151.70             |
| A_68_P28010563 | chr11:90111119-90111163                           | NM_026178:351      | Mmd           | INSIDE                 | 0.182                                                        | 0.537                          | 1392.39            | 747.76             | 0.098                          | 1216.44            | 119.17             |
| A_68_P32181752 | chr19:53389016-53389065                           | NM_001008542:4045  | Mxi1          | INSIDE                 | 0.182                                                        | 0.603                          | 1309.82            | 789.28             | 0.109                          | 1068.00            | 116.93             |
| A_68_P21070363 | chr2:25037051-25037095                            | NM_025980:795      | Nrarp         | INSIDE                 | 0.182                                                        | 0.638                          | 1694.75            | 1080.83            | 0.116                          | 1259.37            | 145.94             |
| A_68_P28950724 | chr13:36818604-36818663                           | NM_153529:7690     | Nrn1          | INSIDE                 | 0.182                                                        | 0.540                          | 1648.09            | 890.21             | 0.098                          | 1233.86            | 121.18             |
| A_68_P29237603 | chr13:95654247-95654300                           | NM_011021:8692     | Otp           | DOWNSTREAM             | 0.182                                                        | 0.589                          | 1535.76            | 904.01             | 0.107                          | 1129.08            | 121.13             |
| A_68_P31154665 | chr17:34729645-34729690                           | NM_017463:252      | Pbx2          | INSIDE                 | 0.182                                                        | 0.709                          | 1466.36            | 1039.81            | 0.129                          | 925.73             | 119.51             |
| A_68_P26056692 | chr8:93594415-93594471                            | NM_011250:450      | Rbl2          | INSIDE                 | 0.182                                                        | 0.594                          | 1386.35            | 823.65             | 0.108                          | 1123.90            | 121.48             |
| A_68_P31383391 | chr17:80878801-80878845                           | NM_009231:971      | Sos1          | INSIDE                 | 0.182                                                        | 0.509                          | 1623.90            | 826.37             | 0.093                          | 1268.82            | 117.54             |
| A_68_P24521963 | chr6:67485504-67485548                            | NM_020047:290      | Tacstd2       | INSIDE                 | 0.182                                                        | 0.625                          | 1355.82            | 847.36             | 0.114                          | 1084.56            | 123.42             |
| A_68_P21740453 | chr2:150514165-150514209                          | NM_054068:687      | Vsx1          | INSIDE                 | 0.182                                                        | 0.599                          | 1922.73            | 1151.76            | 0.109                          | 1459.65            | 158.99             |
| A_68_P27291141 | chr10:81167742-81167786                           | BC064812:195       |               | INSIDE                 | 0.182                                                        | 0.318                          | 2539.46            | 807.21             | 0.058                          | 2045.19            | 118.50             |
| A_68_P30645469 | chr16:31080852-31080896                           | NM_198626:644      | Al480653      | INSIDE                 | 0.181                                                        | 0.322                          | 2651.92            | 854.51             | 0.058                          | 2070.11            | 120.64             |
| A_68_P20026601 | chr1:10222483-10222527                            | NM_001102430:247   | Arfgef1       | INSIDE                 | 0.181                                                        | 0.586                          | 1307.97            | 766.37             | 0.106                          | 1126.76            | 119.19             |
| A_68_P27275484 | chr10:78215712-78215756                           | NM_027630:78       | Ccdc105       | INSIDE                 | 0.181                                                        | 0.558                          | 2358.13            | 1314.68            | 0.101                          | 1792.99            | 181.33             |
| A_68_P26170767 | chr8:114414110-114414154                          | NM_0019950:19667   | Chst5         | INSIDE                 | 0.181                                                        | 0.495                          | 1585.65            | 784.79             | 0.090                          | 1403.18            | 125.96             |
| A_68_P25025637 | chr7:29940517-29940567                            | NM_001146023:687   | Fam98c        | INSIDE                 | 0.181                                                        | 0.556                          | 1451.94            | 807.71             | 0.101                          | 1163.45            | 117.14             |
| A_68_P31631189 | chr18:38129379-38129423                           | NM_175684:-15      | Fchsdl        | PROMOTER               | 0.181                                                        | 0.669                          | 2092.14            | 1398.67            | 0.121                          | 1673.93            | 202.19             |
| A_68_P20842590 | chr1:176432550-176432594                          | NM_019445:617      | Fmn2          | INSIDE                 | 0.181                                                        | 0.638                          | 1574.02            | 1004.34            | 0.115                          | 1155.67            | 133.46             |
| A_68_P26073621 | chr8:96335410-96335454                            | NM_001113384:695   | Gnao1         | INSIDE                 | 0.181                                                        | 0.552                          | 2769.36            | 1529.05            | 0.100                          | 2015.45            | 200.99             |

| ProbeName      | Target position of probe on CpG island microarray | TargetID           | GeneSymbol    | CpG island Description | Ratio of relative methylation (TiO <sub>2</sub> -NP/Vehicle) | Sham group                     |                    |                    | TiO <sub>2</sub> -H group      |                    |                    |
|----------------|---------------------------------------------------|--------------------|---------------|------------------------|--------------------------------------------------------------|--------------------------------|--------------------|--------------------|--------------------------------|--------------------|--------------------|
|                |                                                   |                    |               |                        |                                                              | Relative methylation (Cy5/Cy3) | Cy3 signal (Input) | Cy5 signal (MeDIP) | Relative methylation (Cy5/Cy3) | Cy3 signal (Input) | Cy5 signal (MeDIP) |
| A_68_P25502648 | chr7:134005213-134005270                          | NM_172746:-244     | Hirip3        | DIVERGENT_PROMOTER     | 0.181                                                        | 0.659                          | 1454.84            | 959.35             | 0.120                          | 1046.73            | 125.14             |
| A_68_P24038737 | chr5:120890387-120890431                          | NM_008499:8514     | Lhx5          | INSIDE                 | 0.181                                                        | 0.572                          | 1899.66            | 1086.15            | 0.104                          | 1449.40            | 150.04             |
| A_68_P20148353 | chr1:36501896-36501940                            | NM_001013374:166   | Lman2l        | INSIDE                 | 0.181                                                        | 0.726                          | 2408.16            | 1749.22            | 0.132                          | 1650.16            | 217.32             |
| A_68_P21122318 | chr2:33436169-33436213                            | NM_010725:59841    | Lmx1b         | INSIDE                 | 0.181                                                        | 0.541                          | 1521.56            | 822.65             | 0.098                          | 1185.10            | 115.98             |
| A_68_P29619152 | chr14:56279216-56279260                           | NM_023397:107      | Mdp1          | INSIDE                 | 0.181                                                        | 0.725                          | 2116.29            | 1534.67            | 0.132                          | 1468.61            | 193.27             |
| A_68_P26610633 | chr9:69245586-69245639                            | NM_145618:-192     | Narg2         | PROMOTER               | 0.181                                                        | 0.673                          | 1114.09            | 750.22             | 0.122                          | 952.46             | 115.92             |
| A_68_P30165307 | chr15:41278629-41278673                           | NM_001130166:-377  | Oxr1          | PROMOTER               | 0.181                                                        | 0.506                          | 1656.22            | 838.61             | 0.092                          | 1344.99            | 123.31             |
| A_68_P24995083 | chr7:20334983-20335030                            | NM_008990:-84      | Pvrl2         | PROMOTER               | 0.181                                                        | 1.931                          | 6073.00            | 11724.05           | 0.350                          | 3805.69            | 1332.55            |
| A_68_P31000876 | chr16:97985140-97985184                           | NM_023663:200      | Ripk4         | INSIDE                 | 0.181                                                        | 0.434                          | 2082.83            | 904.70             | 0.079                          | 1521.97            | 119.59             |
| A_68_P21081135 | chr2:26772103-26772147                            | NM_013677:-74      | Surf1         | PROMOTER               | 0.181                                                        | 0.625                          | 4877.48            | 3050.33            | 0.113                          | 3438.21            | 389.04             |
| A_68_P20908721 | chr1:188528261-188528311                          | NM_009367:1585     | Tgfb2         | INSIDE                 | 0.181                                                        | 0.709                          | 1323.93            | 938.52             | 0.128                          | 953.64             | 122.07             |
| A_68_P24946869 | chr7:3645931-3645975                              | NM_024168:-157     | Tsen34        | PROMOTER               | 0.181                                                        | 0.722                          | 2688.92            | 1942.53            | 0.131                          | 1972.03            | 258.20             |
| A_68_P28072085 | chr11:100981492-100981536                         | NM_134024:70       | Tubg1         | INSIDE                 | 0.181                                                        | 0.493                          | 2031.08            | 1001.35            | 0.089                          | 1424.27            | 126.75             |
| A_68_P27357053 | chr10:93498402-93498447                           | NM_172538:69       | Vezt          | INSIDE                 | 0.181                                                        | 0.651                          | 1418.07            | 923.77             | 0.118                          | 1056.89            | 124.90             |
| A_68_P24152596 | chr5:143105941-143105985                          | NM_178398:425      | Wipi2         | INSIDE                 | 0.181                                                        | 0.475                          | 1697.21            | 806.27             | 0.086                          | 1383.16            | 119.16             |
| A_68_P27804180 | chr11:53138329-53138380                           | NM_026479:164      | Zecbc10       | INSIDE                 | 0.181                                                        | 0.432                          | 2399.18            | 1036.96            | 0.078                          | 1102.79            | 133.06             |
| A_68_P24994119 | chr7:20162872-20162916                            | NM_022409:259      | Zfp296        | INSIDE                 | 0.181                                                        | 0.392                          | 2668.91            | 1045.35            | 0.071                          | 1836.11            | 129.85             |
| A_68_P29051401 | A_68_P29051401                                    | Unknown            | Unknown       | Unknown                | 0.181                                                        | 1.742                          | 4051.15            | 7058.16            | 0.316                          | 2755.71            | 870.08             |
| A_68_P23763025 | chr5:67011439-67011483                            | NM_001201413:-1404 | Apbb2         | PROMOTER               | 0.180                                                        | 0.645                          | 5037.93            | 3247.43            | 0.116                          | 4030.61            | 468.32             |
| A_68_P25352107 | chr7:104886338-104886382                          | NM_175105:397      | Aqp11         | INSIDE                 | 0.180                                                        | 0.737                          | 2131.95            | 1571.00            | 0.133                          | 1621.23            | 215.26             |
| A_68_P28088312 | chr11:103827831-103827875                         | NM_007477:-332     | Arf2          | PROMOTER               | 0.180                                                        | 0.522                          | 1991.90            | 1038.99            | 0.094                          | 1486.10            | 139.51             |
| A_68_P20831243 | chr1:174078348-174078392                          | NM_153555:225      | Deaf8         | INSIDE                 | 0.180                                                        | 0.543                          | 1808.79            | 982.31             | 0.098                          | 1229.52            | 120.15             |
| A_68_P28890407 | chr13:25147770-25147817                           | NM_001195617:-79   | Dcdc2a        | PROMOTER               | 0.180                                                        | 0.432                          | 1824.85            | 789.13             | 0.078                          | 1513.07            | 117.75             |
| A_68_P21767852 | chr2:155652392-155652439                          | NM_010579:246      | Eif6          | INSIDE                 | 0.180                                                        | 0.578                          | 2736.92            | 1581.08            | 0.104                          | 1938.08            | 201.22             |
| A_68_P27077942 | chr10:39090283-39090342                           | NM_001122892:708   | Fyn           | INSIDE                 | 0.180                                                        | 3.150                          | 6416.29            | 20214.34           | 0.566                          | 3781.55            | 2139.74            |
| A_68_P27784886 | chr11:49608055-49608100                           | NM_013529:421      | Gfp2          | INSIDE                 | 0.180                                                        | 0.638                          | 2029.21            | 1294.67            | 0.115                          | 1681.83            | 192.78             |
| A_68_P23364007 | chr4:140981800-140981844                          | NM_013868:5129     | Hspb7         | DOWNSTREAM             | 0.180                                                        | 0.706                          | 2165.62            | 1527.90            | 0.127                          | 1598.95            | 202.64             |
| A_68_P24538445 | chr6:71781870-71781919                            | NM_029673:570      | Immt          | INSIDE                 | 0.180                                                        | 0.503                          | 1708.21            | 858.99             | 0.090                          | 1305.46            | 118.05             |
| A_68_P31791018 | chr18:67449050-67449094                           | NM_053261:196      | Impa2         | INSIDE                 | 0.180                                                        | 0.744                          | 4171.49            | 3104.40            | 0.134                          | 3098.51            | 414.33             |
| A_68_P26065131 | chr8:94880961-94881005                            | NM_018826:-712     | Irx5          | DIVERGENT_PROMOTER     | 0.180                                                        | 0.569                          | 2009.01            | 1142.78            | 0.103                          | 1364.64            | 139.90             |
| A_68_P20290945 | chr1:64168690-64168734                            | NM_033563:-749     | Klf7          | PROMOTER               | 0.180                                                        | 0.586                          | 1484.49            | 870.28             | 0.105                          | 1106.58            | 116.54             |
| A_68_P24119632 | chr5:136611907-136611951                          | NM_027891:16       | Lrwd1         | INSIDE                 | 0.180                                                        | 0.435                          | 2165.95            | 942.65             | 0.078                          | 1614.95            | 126.51             |
| A_68_P25266321 | chr7:87515732-87515779                            | NM_172903:506      | Man2a2        | INSIDE                 | 0.180                                                        | 0.695                          | 2106.99            | 1463.86            | 0.125                          | 1410.98            | 176.06             |
| A_68_P27788132 | chr11:50172976-50173028                           | NR_030529:-1621    | Mir804        | PROMOTER               | 0.180                                                        | 0.654                          | 1286.76            | 841.29             | 0.118                          | 1003.26            | 118.06             |
| A_68_P24362056 | chr6:35489772-35489816                            | NM_008098:94       | Mtpn          | INSIDE                 | 0.180                                                        | 0.428                          | 1963.24            | 840.72             | 0.077                          | 1668.73            | 128.37             |
| A_68_P26242531 | chr8:126472768-126472821                          | NM_172288:371      | Nup133        | INSIDE                 | 0.180                                                        | 0.589                          | 2114.34            | 1245.39            | 0.106                          | 1447.79            | 153.73             |
| A_68_P22356950 | chr3:97692610-97692655                            | NM_001039376:-2    | Pde4dip       | PROMOTER               | 0.180                                                        | 0.581                          | 1515.51            | 880.91             | 0.105                          | 1143.04            | 119.58             |
| A_68_P30346974 | chr15:76062654-76062698                           | NM_001163542:-868  | Plec          | PROMOTER               | 0.180                                                        | 0.463                          | 1944.49            | 901.27             | 0.083                          | 1415.25            | 117.86             |
| A_68_P26533942 | chr9:55889666-55889710                            | NM_011992:37       | Rcn2          | INSIDE                 | 0.180                                                        | 0.433                          | 1976.80            | 855.38             | 0.078                          | 1529.11            | 118.78             |
| A_68_P24946917 | chr7:3655779-3655833                              | NM_029767:164      | Rps9          | INSIDE                 | 0.180                                                        | 0.571                          | 1422.66            | 812.06             | 0.103                          | 1166.18            | 120.11             |
| A_68_P23327084 | chr4:134731141-134731185                          | NM_019732:54603    | Runx3         | INSIDE                 | 0.180                                                        | 0.672                          | 1193.06            | 801.36             | 0.121                          | 988.42             | 119.79             |
| A_68_P31412148 | chr17:86091318-86091363                           | NM_011380:-3746    | Six2          | PROMOTER               | 0.180                                                        | 0.475                          | 1908.55            | 906.61             | 0.085                          | 1365.48            | 116.60             |
| A_68_P21395065 | chr2:84706336-84706380                            | NM_001083809:25576 | Slc43a1       | DOWNSTREAM             | 0.180                                                        | 0.526                          | 3371.98            | 1774.51            | 0.095                          | 2424.73            | 229.96             |
| A_68_P22049384 | chr3:34548485-34548529                            | NM_011443:-420     | Sox2          | PROMOTER               | 0.180                                                        | 0.689                          | 2288.19            | 1577.17            | 0.124                          | 1629.69            | 202.39             |
| A_68_P31096072 | chr17:24345615-24345659                           | NM_001163847:-3129 | Tbc1d24       | PROMOTER               | 0.180                                                        | 0.609                          | 1317.18            | 802.77             | 0.110                          | 1082.52            | 118.90             |
| A_68_P21796145 | chr2:160471648-160471692                          | NM_009408:38       | Top1          | INSIDE                 | 0.180                                                        | 0.712                          | 1596.72            | 1136.89            | 0.128                          | 1198.05            | 153.55             |
| A_68_P21642319 | chr2:132641532-132641578                          | NM_175113:236      | Trmt6         | INSIDE                 | 0.180                                                        | 0.537                          | 1786.05            | 958.61             | 0.097                          | 1240.30            | 119.83             |
| A_68_P31771006 | chr18:63851716-63851760                           | NM_016792:275      | Txn1l         | INSIDE                 | 0.180                                                        | 0.338                          | 2655.78            | 897.07             | 0.061                          | 2002.14            | 121.86             |
| A_68_P21567194 | chr2:118798746-118798790                          | AK184532:45300     |               | INSIDE                 | 0.180                                                        | 0.625                          | 1227.86            | 767.91             | 0.113                          | 1024.87            | 115.36             |
| A_68_P22130347 | chr3:51364112-51364156                            | NR_033624:456      | 5031434O11Rik | INSIDE                 | 0.179                                                        | 0.478                          | 1863.67            | 890.38             | 0.085                          | 1364.20            | 116.63             |
| A_68_P21483985 | chr2:103406320-103406364                          | NM_178890:-124     | Abtb2         | PROMOTER               | 0.179                                                        | 1.477                          | 3797.96            | 5609.94            | 0.264                          | 2414.63            | 638.31             |

| ProbeName      | Target position of probe on CpG island microarray | TargetID          | GeneSymbol    | CpG island Description | Ratio of relative methylation (TiO <sub>2</sub> -NP/Vehicle) | Sham group                     |                    |                    | TiO <sub>2</sub> -H group      |                    |                    |
|----------------|---------------------------------------------------|-------------------|---------------|------------------------|--------------------------------------------------------------|--------------------------------|--------------------|--------------------|--------------------------------|--------------------|--------------------|
|                |                                                   |                   |               |                        |                                                              | Relative methylation (Cy5/Cy3) | Cy3 signal (Input) | Cy5 signal (MeDIP) | Relative methylation (Cy5/Cy3) | Cy3 signal (Input) | Cy5 signal (MeDIP) |
| A_68_P31762245 | chr18:62340024-62340068                           | NM_007420:433     | Adrb2         | PROMOTER               | 0.179                                                        | 1.460                          | 5578.55            | 8143.74            | 0.262                          | 3947.58            | 1032.70            |
| A_68_P25657171 | chr8:11727694-11727738                            | NM_001113517:388  | Arhgef7       | PROMOTER               | 0.179                                                        | 0.584                          | 1503.22            | 877.26             | 0.104                          | 1135.66            | 118.52             |
| A_68_P20147469 | chr1:36364742-36364786                            | NM_001172205:187  | Arid5a        | INSIDE                 | 0.179                                                        | 0.533                          | 1711.95            | 913.27             | 0.095                          | 1292.59            | 123.34             |
| A_68_P31545964 | chr18:21811364-21811410                           | NM_001081403:517  | Klhl14        | PROMOTER               | 0.179                                                        | 0.623                          | 1563.99            | 974.57             | 0.112                          | 1184.81            | 123.50             |
| A_68_P21583616 | chr2:121781508-121781552                          | NM_008545:298     | Mageb3        | INSIDE                 | 0.179                                                        | 0.561                          | 2686.96            | 1508.04            | 0.100                          | 1953.02            | 196.18             |
| A_68_P32252888 | chrX:10294568-10294612                            | NM_001166635:100  | Midlip1       | INSIDE                 | 0.179                                                        | 2.996                          | 2297.32            | 6882.51            | 0.536                          | 930.03             | 498.07             |
| A_68_P25394533 | chr7:112959197-112959241                          | NM_025301:383     | Mrp117        | INSIDE                 | 0.179                                                        | 0.522                          | 1705.03            | 890.18             | 0.093                          | 1259.14            | 117.49             |
| A_68_P22129524 | chr3:51220706-51220750                            | NM_053089:791     | Naa15         | INSIDE                 | 0.179                                                        | 0.681                          | 1206.14            | 821.71             | 0.122                          | 1011.94            | 123.47             |
| A_68_P26343619 | chr9:20531260-20531304                            | NM_173777:1376    | Olfm2         | INSIDE                 | 0.179                                                        | 0.522                          | 1783.14            | 930.71             | 0.094                          | 1271.45            | 118.88             |
| A_68_P23575370 | chr5:31209922-31209966                            | NM_001134692:151  | Ost4          | INSIDE                 | 0.179                                                        | 0.473                          | 4382.49            | 2073.94            | 0.085                          | 2858.10            | 241.87             |
| A_68_P25366405 | chr7:107375733-107375777                          | NM_027629:362     | Pgm211        | PROMOTER               | 0.179                                                        | 0.686                          | 1188.00            | 814.92             | 0.123                          | 969.53             | 119.37             |
| A_68_P21913219 | chr2:181599054-181599098                          | NM_025901:12      | Pohr3k        | INSIDE                 | 0.179                                                        | 0.607                          | 1461.74            | 887.60             | 0.109                          | 1166.18            | 126.95             |
| A_68_P23393509 | chr4:147661752-147661796                          | NM_001083342:300  | Ptchd2        | INSIDE                 | 0.179                                                        | 0.704                          | 3244.74            | 2285.80            | 0.126                          | 2490.23            | 314.76             |
| A_68_P29696767 | chr14:70107122-70107166                           | NM_001146012:243  | R3hcc1        | INSIDE                 | 0.179                                                        | 0.480                          | 2629.67            | 1261.18            | 0.086                          | 2007.08            | 172.62             |
| A_68_P20598626 | chr1:129999945-129999989                          | NM_181750:84      | R3hdm1        | INSIDE                 | 0.179                                                        | 0.680                          | 1163.91            | 791.07             | 0.121                          | 967.60             | 117.56             |
| A_68_P28535623 | chr12:74213467-74213511                           | NM_011382:744     | Six4          | INSIDE                 | 0.179                                                        | 0.632                          | 1480.46            | 935.19             | 0.113                          | 1084.65            | 122.46             |
| A_68_P27554681 | chr11:3813626-3813670                             | NM_153142:1019    | Slc35e4       | INSIDE                 | 0.179                                                        | 0.665                          | 1359.73            | 904.61             | 0.119                          | 1012.87            | 120.44             |
| A_68_P27779983 | chr11:48614301-48614357                           | NR_028563:-1206   | Snord96a      | PROMOTER               | 0.179                                                        | 0.631                          | 1358.53            | 857.39             | 0.113                          | 1073.11            | 121.33             |
| A_68_P31255140 | chr17:56443504-56443548                           | NM_001111078:-209 | Uhrf1         | PROMOTER               | 0.179                                                        | 0.492                          | 2188.59            | 1076.76            | 0.088                          | 1546.69            | 136.25             |
| A_68_P25030741 | chr7:31065286-31065332                            | NM_146186:132     | Wdr62         | INSIDE                 | 0.179                                                        | 0.561                          | 1506.21            | 844.99             | 0.101                          | 1176.12            | 118.34             |
| A_68_P29630483 | chr14:58509439-58509485                           | NM_029492:-363    | Zdhhc20       | PROMOTER               | 0.179                                                        | 1.573                          | 650.04             | 1022.74            | 0.282                          | 553.45             | 156.16             |
| A_68_P21092717 | chr2:28555343-28555389                            | NM_027283:-195    | 1700026L06Rik | DIVERGENT_PROMOTER     | 0.178                                                        | 0.655                          | 1843.17            | 1207.22            | 0.116                          | 1391.48            | 162.00             |
| A_68_P20147470 | chr1:36364812-36364860                            | NM_001172205:259  | Arid5a        | INSIDE                 | 0.178                                                        | 0.711                          | 1746.68            | 1241.52            | 0.127                          | 1260.98            | 159.54             |
| A_68_P21424191 | chr2:91550574-91550618                            | NM_145528:137     | Atg13         | INSIDE                 | 0.178                                                        | 0.473                          | 1858.80            | 878.54             | 0.084                          | 1387.62            | 116.93             |
| A_68_P24763305 | chr6:113991563-113991607                          | NM_009723:490     | Atp2b2        | INSIDE                 | 0.178                                                        | 2.059                          | 2370.00            | 4879.63            | 0.366                          | 1373.47            | 502.65             |
| A_68_P21632199 | chr2:130732765-130732810                          | NM_009730:556     | Atm           | INSIDE                 | 0.178                                                        | 0.698                          | 1194.82            | 834.42             | 0.125                          | 938.74             | 116.92             |
| A_68_P21630551 | chr2:130406332-130406390                          | NM_009732:1917    | Avp           | DOWNSTREAM             | 0.178                                                        | 1.730                          | 1320.96            | 2285.70            | 0.308                          | 911.32             | 280.29             |
| A_68_P27899586 | chr11:70042779-70042828                           | NM_007528:497     | Bel6b         | INSIDE                 | 0.178                                                        | 0.707                          | 1860.62            | 1315.18            | 0.126                          | 1418.07            | 178.73             |
| A_68_P28175446 | chr11:118902080-118902124                         | NM_013926:125     | Cbx8          | INSIDE                 | 0.178                                                        | 0.588                          | 3311.35            | 1947.04            | 0.105                          | 2201.83            | 230.95             |
| A_68_P28602894 | chr12:86560864-86560908                           | NM_145445:424     | Eif2b2        | INSIDE                 | 0.178                                                        | 0.661                          | 1526.31            | 1008.15            | 0.118                          | 1129.99            | 132.96             |
| A_68_P31948068 | chr19:10116519-10116563                           | NM_021890:503     | Fads3         | INSIDE                 | 0.178                                                        | 0.600                          | 1581.44            | 948.93             | 0.107                          | 1133.36            | 120.95             |
| A_68_P26224676 | chr8:123649716-123649760                          | NM_008024:-1846   | Foxl1         | PROMOTER               | 0.178                                                        | 0.486                          | 1908.77            | 927.75             | 0.086                          | 1476.05            | 127.61             |
| A_68_P28221328 | chr12:8308980-8309024                             | NM_013527:-242    | Gdf7          | PROMOTER               | 0.178                                                        | 0.566                          | 1528.93            | 864.66             | 0.101                          | 1200.00            | 120.75             |
| A_68_P28155560 | chr11:115685911-115685955                         | NM_145438:561     | Llgl2         | INSIDE                 | 0.178                                                        | 0.519                          | 2565.41            | 1330.25            | 0.092                          | 1869.48            | 172.17             |
| A_68_P21122757 | chr2:33496008-33496052                            | NM_010725:1       | Lmx1b         | INSIDE                 | 0.178                                                        | 0.495                          | 1718.67            | 851.39             | 0.088                          | 1333.11            | 117.87             |
| A_68_P27848679 | chr11:61307617-61307661                           | NM_011841:67      | Mapk7         | INSIDE                 | 0.178                                                        | 0.647                          | 1338.78            | 866.40             | 0.115                          | 1014.69            | 116.64             |
| A_68_P22312509 | chr3:88019343-88019387                            | NR_029817:-155    | Mir9-1        | PROMOTER               | 0.178                                                        | 0.704                          | 1355.53            | 953.77             | 0.125                          | 941.17             | 118.08             |
| A_68_P24114757 | chr5:135583228-135583272                          | NM_021455:468     | Mlxipl        | INSIDE                 | 0.178                                                        | 0.696                          | 1265.56            | 880.64             | 0.124                          | 935.18             | 115.78             |
| A_68_P31055436 | chr17:13109119-13109167                           | NM_026310:-185    | Mrp118        | DIVERGENT_PROMOTER     | 0.178                                                        | 0.692                          | 1534.51            | 1061.22            | 0.123                          | 1131.07            | 139.01             |
| A_68_P31112797 | chr17:26987123-26987182                           | NM_008700:-8642   | Nkx2-5        | PROMOTER               | 0.178                                                        | 1.689                          | 594.11             | 1003.18            | 0.301                          | 401.73             | 120.88             |
| A_68_P31066339 | chr17:15701385-15701429                           | NM_144809:-1119   | Prdm9         | PROMOTER               | 0.178                                                        | 0.554                          | 1517.87            | 840.84             | 0.099                          | 1188.33            | 117.49             |
| A_68_P32957124 | chr17:8533875-8533919                             | NM_178774:293     | Prr18         | INSIDE                 | 0.178                                                        | 0.444                          | 1898.57            | 842.57             | 0.079                          | 1453.11            | 114.99             |
| A_68_P28726320 | chr12:109416772-109416817                         | NM_028262:700     | Setd3         | INSIDE                 | 0.178                                                        | 0.516                          | 1860.07            | 959.94             | 0.092                          | 1310.87            | 120.28             |
| A_68_P30485733 | chr15:100253963-100254009                         | NM_008732:-500    | Slc11a2       | PROMOTER               | 0.178                                                        | 0.606                          | 2749.82            | 1665.72            | 0.108                          | 2146.70            | 231.20             |
| A_68_P28550371 | chr12:76920085-76920143                           | NM_001005510:810  | Syne2         | INSIDE                 | 0.178                                                        | 0.419                          | 2072.35            | 868.40             | 0.075                          | 1623.89            | 121.31             |
| A_68_P26247735 | chr8:127318077-127318121                          | NM_198632:1180    | Trim67        | INSIDE                 | 0.178                                                        | 0.382                          | 2268.52            | 865.46             | 0.068                          | 1732.63            | 117.89             |
| A_68_P31257918 | chr17:56856812-56856859                           | NM_178926:-491    | Vmac          | PROMOTER               | 0.178                                                        | 0.711                          | 1313.12            | 933.32             | 0.126                          | 919.68             | 116.17             |
| A_68_P22400150 | chr3:105761819-105761870                          | NM_027432:-571    | Wdr77         | PROMOTER               | 0.178                                                        | 0.456                          | 1956.63            | 891.26             | 0.081                          | 1557.28            | 126.30             |
| A_68_P23299525 | chr4:129662999-129663043                          | NM_001199696:699  | Bai2          | INSIDE                 | 0.177                                                        | 1.930                          | 5092.59            | 9827.63            | 0.342                          | 2909.27            | 994.51             |
| A_68_P24605098 | chr6:85401665-85401709                            | NM_007638:188     | Cet7          | INSIDE                 | 0.177                                                        | 0.492                          | 1677.19            | 825.62             | 0.087                          | 1338.67            | 116.59             |
| A_68_P23103758 | chr4:91041293-91041337                            | NM_010486:-2568   | Elavl2        | PROMOTER               | 0.177                                                        | 0.728                          | 2369.28            | 1724.79            | 0.129                          | 1762.39            | 227.00             |

| ProbeName      | Target position of probe on CpG island microarray | TargetID                | GeneSymbol    | CpG island Description | Ratio of relative methylation (TiO <sub>2</sub> -NP/Vehicle) | Sham group                     |                    |                    | TiO <sub>2</sub> -H group      |                    |                    |
|----------------|---------------------------------------------------|-------------------------|---------------|------------------------|--------------------------------------------------------------|--------------------------------|--------------------|--------------------|--------------------------------|--------------------|--------------------|
|                |                                                   |                         |               |                        |                                                              | Relative methylation (Cy5/Cy3) | Cy3 signal (Input) | Cy5 signal (MeDIP) | Relative methylation (Cy5/Cy3) | Cy3 signal (Input) | Cy5 signal (MeDIP) |
| A_68_P26779727 | chr9:102256967-102257011                          | NM_001168296:35         | Ephb1         | INSIDE                 | 0.177                                                        | 0.607                          | 4893.64            | 2968.88            | 0.107                          | 3316.01            | 355.60             |
| A_68_P23613114 | chr5:37728265-37728310                            | NM_021292:-167          | Evc           | DIVERGENT_PROMOTER     | 0.177                                                        | 0.579                          | 1583.03            | 916.19             | 0.102                          | 1174.62            | 120.25             |
| A_68_P22392958 | chr3:104561530-104561574                          | NM_183224:18913         | Fam19a3       | DOWNSTREAM             | 0.177                                                        | 0.617                          | 1349.72            | 833.05             | 0.109                          | 1104.18            | 120.34             |
| A_68_P27980049 | chr11:84683380-84683424                           | NM_153144:838           | Ggnbp2        | INSIDE                 | 0.177                                                        | 0.632                          | 1488.84            | 941.06             | 0.112                          | 1155.09            | 129.12             |
| A_68_P24168905 | chr5:147396571-147396615                          | NM_008151:-612          | Gpr12         | PROMOTER               | 0.177                                                        | 0.445                          | 1817.97            | 809.44             | 0.079                          | 1519.45            | 119.57             |
| A_68_P23571064 | chr5:30481871-30481915                            | NM_145558:31            | Hadhb         | INSIDE                 | 0.177                                                        | 0.509                          | 3436.32            | 1749.92            | 0.090                          | 2549.02            | 229.29             |
| A_68_P23416916 | chr4:151534184-151534228                          | NM_008236:1231          | Hes2          | INSIDE                 | 0.177                                                        | 0.454                          | 2238.35            | 1016.34            | 0.080                          | 1494.86            | 120.07             |
| A_68_P21338894 | chr2:74536266-74536310                            | NM_013555:469           | Hoxd9         | INSIDE                 | 0.177                                                        | 0.544                          | 1477.23            | 803.63             | 0.096                          | 1236.00            | 119.12             |
| A_68_P21129648 | chr2:34627186-34627230                            | NM_001163434:-401       | Hspa5         | PROMOTER               | 0.177                                                        | 0.707                          | 1444.82            | 1022.11            | 0.125                          | 1126.15            | 140.86             |
| A_68_P28293528 | chr12:25783564-25783608                           | NM_010496:-2629         | Id2           | PROMOTER               | 0.177                                                        | 0.597                          | 1489.70            | 889.03             | 0.105                          | 1139.54            | 120.04             |
| A_68_P26317489 | chr9:14304655-14304699                            | NM_173433:250           | Kdm4d         | INSIDE                 | 0.177                                                        | 0.575                          | 2013.19            | 1156.58            | 0.101                          | 1392.24            | 141.29             |
| A_68_P27279737 | chr10:79384185-79384238                           | NM_053244:4496          | Kiss1r        | INSIDE                 | 0.177                                                        | 1.533                          | 1071.29            | 1642.47            | 0.272                          | 799.13             | 217.16             |
| A_68_P27947420 | chr11:78960035-78960079                           | NM_013571:-200          | Ksr1          | PROMOTER               | 0.177                                                        | 0.373                          | 2319.40            | 865.07             | 0.066                          | 1805.20            | 119.02             |
| A_68_P31104861 | chr17:25716207-25716251                           | NM_029624:110           | Lmf1          | INSIDE                 | 0.177                                                        | 0.492                          | 2633.19            | 1294.44            | 0.087                          | 1919.27            | 167.02             |
| A_68_P24563513 | chr6:77193982-77194026                            | NM_028880:1294          | Lrrtm1        | INSIDE                 | 0.177                                                        | 0.457                          | 1945.42            | 888.59             | 0.081                          | 1482.37            | 119.94             |
| A_68_P30295276 | chr15:66801140-66801184                           | NM_008681:41            | Ndrg1         | INSIDE                 | 0.177                                                        | 0.434                          | 3852.04            | 1672.29            | 0.077                          | 3098.07            | 238.36             |
| A_68_P31099229 | chr17:24861250-24861296                           | NM_026684:61            | Ndufb10       | INSIDE                 | 0.177                                                        | 0.711                          | 2065.37            | 1468.64            | 0.126                          | 1496.96            | 188.66             |
| A_68_P32201474 | chr19:56623518-56623562                           | NM_025811:790           | Nhlrc2        | INSIDE                 | 0.177                                                        | 0.666                          | 1445.69            | 963.43             | 0.118                          | 1061.21            | 125.12             |
| A_68_P30397616 | chr15:84753564-84753608                           | NM_016714:-271          | Nup50         | PROMOTER               | 0.177                                                        | 0.446                          | 2041.68            | 911.47             | 0.079                          | 1585.46            | 125.19             |
| A_68_P24595789 | chr6:83781804-83781857                            | NM_146169:-95           | Paip2b        | PROMOTER               | 0.177                                                        | 0.494                          | 1921.04            | 948.76             | 0.087                          | 1366.72            | 119.32             |
| A_68_P22518759 | chr3:128919062-128919106                          | NM_001042502:2230       | Pitx2         | INSIDE                 | 0.177                                                        | 0.544                          | 2054.18            | 1116.66            | 0.096                          | 1399.82            | 134.47             |
| A_68_P26079048 | chr8:97219780-97219824                            | NM_026385:340           | Pilp          | INSIDE                 | 0.177                                                        | 0.477                          | 2353.33            | 1123.46            | 0.085                          | 1746.55            | 147.88             |
| A_68_P21952656 | chr3:13473217-13473261                            | NM_001163328:1584       | Raly1         | INSIDE                 | 0.177                                                        | 0.658                          | 1229.02            | 809.30             | 0.117                          | 1061.28            | 123.71             |
| A_68_P28513220 | chr12:70284706-70284750                           | NM_025589:326           | Rpl36al       | INSIDE                 | 0.177                                                        | 0.702                          | 1282.42            | 900.25             | 0.124                          | 998.76             | 123.94             |
| A_68_P32016818 | chr19:23347992-23348036                           | NM_153808:353           | Smc5          | INSIDE                 | 0.177                                                        | 0.502                          | 1825.29            | 915.41             | 0.089                          | 1399.17            | 124.51             |
| A_68_P28186321 | chr11:120574903-120574948                         | NM_016665:156           | Stral3        | INSIDE                 | 0.177                                                        | 0.546                          | 3576.16            | 1952.29            | 0.096                          | 2694.71            | 259.95             |
| A_68_P28974244 | chr13:40833219-40833263                           | NM_011547:-4048         | Tcfap2a       | PROMOTER               | 0.177                                                        | 0.669                          | 1395.70            | 934.25             | 0.119                          | 1036.11            | 122.84             |
| A_68_P31213967 | chr17:47875064-47875108                           | NM_001161723:207        | Tefeb         | INSIDE                 | 0.177                                                        | 0.697                          | 1858.49            | 1295.83            | 0.123                          | 1342.55            | 165.59             |
| A_68_P22900943 | chr4:48598769-48598813                            | NM_021436:726           | Tmeff1        | INSIDE                 | 0.177                                                        | 2.012                          | 3128.67            | 6294.60            | 0.357                          | 2112.15            | 753.81             |
| A_68_P25098515 | chr7:53604139-53604183                            | AK015435:229            |               | INSIDE                 | 0.177                                                        | 2.403                          | 6299.31            | 15136.00           | 0.426                          | 4274.96            | 1820.84            |
| A_68_P23692823 | chr5:52505949-52505993                            | AK076709:-2581          |               | PROMOTER               | 0.177                                                        | 0.716                          | 1385.53            | 992.50             | 0.127                          | 947.67             | 120.39             |
| A_68_P23588820 | chr5:33772994-33773048                            | ENSMUST00000030994:824  |               | DOWNSTREAM             | 0.177                                                        | 0.610                          | 1500.98            | 915.70             | 0.108                          | 1134.98            | 122.42             |
| A_68_P27846102 | chr11:60835765-60835809                           | ENSMUST00000089184:-279 |               | PROMOTER               | 0.177                                                        | 0.432                          | 4545.09            | 1961.59            | 0.076                          | 3364.12            | 257.23             |
| A_68_P28956454 | chr13:37870668-37870712                           | ENSMUST00000122842:422  |               | INSIDE                 | 0.177                                                        | 0.501                          | 2105.50            | 1055.28            | 0.089                          | 1466.79            | 130.24             |
| A_68_P27282446 | chr10:79783036-79783080                           | NM_025521:235           | 2310011J03Rik | INSIDE                 | 0.176                                                        | 0.489                          | 1952.13            | 955.33             | 0.086                          | 1409.78            | 121.28             |
| A_68_P25459894 | chr7:125884088-125884134                          | NM_027815:326           | 9030624J02Rik | INSIDE                 | 0.176                                                        | 0.618                          | 3105.32            | 1918.00            | 0.109                          | 2116.17            | 230.08             |
| A_68_P27789380 | chr11:50416439-50416486                           | NM_175643:876           | Adams2        | INSIDE                 | 0.176                                                        | 0.474                          | 1930.20            | 915.07             | 0.083                          | 1400.30            | 116.75             |
| A_68_P26430108 | chr9:37155823-37155867                            | NM_001081429:133        | Ccdc15        | INSIDE                 | 0.176                                                        | 0.675                          | 1495.98            | 1009.74            | 0.119                          | 1046.17            | 124.28             |
| A_68_P26571035 | chr9:62384198-62384249                            | NM_175484:628           | Coro2b        | INSIDE                 | 0.176                                                        | 0.647                          | 1360.55            | 880.36             | 0.114                          | 1039.51            | 118.12             |
| A_68_P30573855 | chr16:17452673-17452717                           | NM_007764:615           | Crkl          | INSIDE                 | 0.176                                                        | 0.673                          | 1312.79            | 882.97             | 0.118                          | 978.99             | 115.74             |
| A_68_P25776075 | chr8:35869882-35869926                            | NM_176933:-759          | Dusp4         | PROMOTER               | 0.176                                                        | 0.435                          | 2041.21            | 888.65             | 0.077                          | 1589.93            | 121.80             |
| A_68_P28067416 | chr11:100180895-100180948                         | NM_011508:-388          | Eif1          | PROMOTER               | 0.176                                                        | 0.619                          | 1706.07            | 1056.87            | 0.109                          | 1144.17            | 125.07             |
| A_68_P26546333 | chr9:58046118-58046162                            | NM_001161535:3382       | Islr2         | INSIDE                 | 0.176                                                        | 0.407                          | 3297.07            | 1343.18            | 0.072                          | 2350.88            | 169.01             |
| A_68_P30345377 | chr15:75828316-75828360                           | NM_177922:4140          | Mapk15        | INSIDE                 | 0.176                                                        | 0.653                          | 1469.85            | 960.03             | 0.115                          | 1061.69            | 122.25             |
| A_68_P24819299 | chr6:125141841-125141885                          | NM_146171:-258          | Ncapd2        | DIVERGENT_PROMOTER     | 0.176                                                        | 0.434                          | 2165.18            | 938.70             | 0.076                          | 1579.73            | 120.74             |
| A_68_P25995582 | chr8:82163121-82163165                            | NM_001081164:-432       | Otud4         | PROMOTER               | 0.176                                                        | 0.474                          | 2162.96            | 1025.66            | 0.084                          | 1395.84            | 116.61             |
| A_68_P29620551 | chr14:56518869-56518914                           | NM_001082975:178        | Sdr39u1       | INSIDE                 | 0.176                                                        | 0.632                          | 1687.88            | 1066.23            | 0.111                          | 1049.63            | 116.66             |
| A_68_P24447792 | chr6:51962699-51962743                            | NM_018773:-172          | Skap2         | PROMOTER               | 0.176                                                        | 0.552                          | 1572.06            | 867.38             | 0.097                          | 1213.14            | 118.04             |
| A_68_P31943157 | chr19:8788272-8788316                             | NM_008577:93            | Slc3a2        | INSIDE                 | 0.176                                                        | 0.613                          | 1539.03            | 943.38             | 0.108                          | 1082.47            | 116.78             |
| A_68_P23616980 | chr5:38430589-38430633                            | NM_026959:137           | Stx18         | INSIDE                 | 0.176                                                        | 0.537                          | 1651.76            | 887.73             | 0.095                          | 1235.71            | 117.17             |
| A_68_P21265457 | chr2:61494997-61495041                            | NM_001164071:63865      | Tank          | DOWNSTREAM             | 0.176                                                        | 0.610                          | 1551.97            | 946.09             | 0.107                          | 1221.48            | 130.74             |

| ProbeName      | Target position of probe on CpG island microarray | TargetID                | GeneSymbol    | CpG island Description | Ratio of relative methylation (TiO <sub>2</sub> -NP/Vehicle) | Sham group                     |                    |                    | TiO <sub>2</sub> -H group      |                    |                    |
|----------------|---------------------------------------------------|-------------------------|---------------|------------------------|--------------------------------------------------------------|--------------------------------|--------------------|--------------------|--------------------------------|--------------------|--------------------|
|                |                                                   |                         |               |                        |                                                              | Relative methylation (Cy5/Cy3) | Cy3 signal (Input) | Cy5 signal (MeDIP) | Relative methylation (Cy5/Cy3) | Cy3 signal (Input) | Cy5 signal (MeDIP) |
| A_68_P25510946 | chr7:135603923-135603972                          | NM_009383:1080          | Tial1         | INSIDE                 | 0.176                                                        | 0.540                          | 1590.33            | 858.61             | 0.095                          | 1259.21            | 119.69             |
| A_68_P25082977 | chr7:50817749-50817793                            | NM_001008549:31         | Zfp658        | INSIDE                 | 0.176                                                        | 0.563                          | 1600.81            | 900.83             | 0.099                          | 1206.00            | 119.75             |
| A_68_P27054330 | chr10:33670738-33670782                           | NM_028287:258           | Zufsp         | INSIDE                 | 0.176                                                        | 0.608                          | 1478.15            | 899.10             | 0.107                          | 1126.53            | 120.72             |
| A_68_P27829965 | chr11:58052895-58052939                           |                         |               | Unknown                | 0.176                                                        | 1.953                          | 15681.64           | 30630.80           | 0.345                          | 10003.40           | 3446.49            |
| A_68_P32389693 | chrX:51278099-51278143                            | ENSMUST00000120892:-154 |               | PROMOTER               | 0.176                                                        | 1.415                          | 967.60             | 1368.97            | 0.249                          | 470.27             | 116.94             |
| A_68_P24330581 | chr6:30123488-30123532                            | NR_038124:-3112         | BB283400      | DIVERGENT_PROMOTER     | 0.175                                                        | 0.640                          | 3801.39            | 2431.18            | 0.112                          | 2702.26            | 302.72             |
| A_68_P29618486 | chr14:56179164-56179210                           | NM_001199009:-573       | Deaf11        | PROMOTER               | 0.175                                                        | 0.715                          | 2883.56            | 2062.36            | 0.125                          | 2143.86            | 267.81             |
| A_68_P23917031 | chr5:98683201-98683245                            | NM_010203:20            | Fgf5          | INSIDE                 | 0.175                                                        | 0.699                          | 1750.58            | 1224.45            | 0.122                          | 1265.06            | 154.45             |
| A_68_P23250455 | chr4:119959495-119959539                          | NM_194060:350           | Foxo6         | INSIDE                 | 0.175                                                        | 0.463                          | 1916.34            | 888.09             | 0.081                          | 1501.80            | 121.52             |
| A_68_P28083427 | chr11:102977675-102977719                         | NM_138753:58            | Hexim1        | INSIDE                 | 0.175                                                        | 0.511                          | 1849.53            | 945.58             | 0.090                          | 1352.84            | 121.25             |
| A_68_P21339175 | chr2:74570928-74570982                            | NM_010468:20905         | Hexd3         | INSIDE                 | 0.175                                                        | 0.672                          | 1839.81            | 1237.11            | 0.118                          | 1054.44            | 124.16             |
| A_68_P23598368 | chr5:35448526-35448576                            | NM_013587:-204          | Lrpap1        | PROMOTER               | 0.175                                                        | 0.675                          | 1419.04            | 957.73             | 0.118                          | 968.39             | 114.65             |
| A_68_P32240002 | chrX:7327694-7327738                              | NR_030454:-2498         | Mir684-1      | DIVERGENT_PROMOTER     | 0.175                                                        | 1.361                          | 1699.90            | 2314.19            | 0.239                          | 593.09             | 141.49             |
| A_68_P20765301 | chr1:162125216-162125275                          | NM_025474:-145          | Mrps14        | PROMOTER               | 0.175                                                        | 0.647                          | 2204.54            | 1426.05            | 0.113                          | 1582.08            | 178.69             |
| A_68_P20852906 | chr1:178205311-178205355                          | NM_176916:111           | Pld5          | INSIDE                 | 0.175                                                        | 0.620                          | 3447.14            | 2137.91            | 0.109                          | 2578.68            | 280.07             |
| A_68_P20349521 | chr1:74647661-74647705                            | NM_021313:289           | Rnf25         | INSIDE                 | 0.175                                                        | 0.607                          | 5399.84            | 3280.06            | 0.106                          | 4086.00            | 433.52             |
| A_68_P29454672 | chr14:22570199-22570243                           | NM_026283:468           | Samd8         | INSIDE                 | 0.175                                                        | 0.658                          | 1611.64            | 1059.89            | 0.115                          | 1149.32            | 132.07             |
| A_68_P24092947 | chr5:130731194-130731238                          | NM_023248:116           | Sbds          | INSIDE                 | 0.175                                                        | 0.649                          | 1450.87            | 941.34             | 0.113                          | 1059.46            | 119.97             |
| A_68_P29034450 | chr13:51888603-51888647                           | NM_013660:389           | Sema4d        | INSIDE                 | 0.175                                                        | 0.539                          | 1663.93            | 896.28             | 0.094                          | 1284.85            | 121.24             |
| A_68_P27131168 | chr10:50620782-50620826                           | NM_011376:5348          | Sim1          | INSIDE                 | 0.175                                                        | 0.712                          | 1361.61            | 969.35             | 0.124                          | 978.40             | 121.59             |
| A_68_P22031732 | chr3:30992663-30992708                            | NM_001039090:-1297      | Skil          | PROMOTER               | 0.175                                                        | 0.538                          | 1678.20            | 903.20             | 0.094                          | 1223.13            | 114.95             |
| A_68_P25840860 | chr8:48373600-48373648                            | NM_001114311:1132       | Stox2         | INSIDE                 | 0.175                                                        | 0.512                          | 1732.66            | 887.09             | 0.090                          | 1330.12            | 119.39             |
| A_68_P26921714 | chr10:7676666-7676718                             | NM_138667:-771          | Tab2          | PROMOTER               | 0.175                                                        | 0.629                          | 1484.26            | 933.95             | 0.110                          | 1229.81            | 135.45             |
| A_68_P27693353 | chr11:33102552-33102596                           | NM_019916:1014          | Tlx3          | INSIDE                 | 0.175                                                        | 0.564                          | 1488.77            | 839.17             | 0.098                          | 1262.33            | 124.20             |
| A_68_P28931388 | chr13:32895025-32895071                           | NM_030215:1150          | Wrnip1        | INSIDE                 | 0.175                                                        | 0.571                          | 1916.49            | 1094.34            | 0.100                          | 1294.07            | 129.40             |
| A_68_P26018919 | chr8:86760604-86760650                            | NM_172503:315           | Zswim4        | INSIDE                 | 0.175                                                        | 2.010                          | 653.32             | 1313.04            | 0.351                          | 491.37             | 172.66             |
| A_68_P24624509 | chr6:88792201-88792245                            | NM_030251:-293          | Atfb1         | PROMOTER               | 0.174                                                        | 1.570                          | 5082.42            | 7978.09            | 0.273                          | 3210.12            | 876.93             |
| A_68_P30092464 | chr15:27396409-27396457                           | NM_020332:1             | Ank           | INSIDE                 | 0.174                                                        | 1.764                          | 1351.34            | 2383.72            | 0.308                          | 918.98             | 282.77             |
| A_68_P26317494 | chr9:14305171-14305215                            | NM_023153:130           | Cwc15         | INSIDE                 | 0.174                                                        | 0.589                          | 2438.09            | 1436.86            | 0.102                          | 2042.22            | 208.86             |
| A_68_P21317591 | chr2:70956240-70956284                            | NM_028593:152           | Cybrd1        | INSIDE                 | 0.174                                                        | 0.585                          | 1607.24            | 939.63             | 0.102                          | 1194.98            | 121.41             |
| A_68_P28100239 | chr11:106078730-106078775                         | NM_028074:513           | Ddx42         | INSIDE                 | 0.174                                                        | 1.479                          | 1082.85            | 1601.05            | 0.258                          | 781.99             | 201.65             |
| A_68_P28732705 | chr12:110691224-110691271                         | NM_001190703:-417       | Dlk1          | PROMOTER               | 0.174                                                        | 0.564                          | 1693.86            | 954.75             | 0.098                          | 1255.25            | 123.15             |
| A_68_P31106383 | chr17:25945693-25945737                           | NM_001164225:-315       | Fbx116        | PROMOTER               | 0.174                                                        | 0.569                          | 1926.85            | 1096.78            | 0.099                          | 1409.88            | 139.80             |
| A_68_P23231912 | chr4:116668443-116668487                          | NM_175244:512           | Heed3         | INSIDE                 | 0.174                                                        | 0.669                          | 2504.04            | 1675.53            | 0.116                          | 1937.40            | 225.04             |
| A_68_P27581115 | chr11:8910943-8910987                             | NM_008316:176           | Hus1          | INSIDE                 | 0.174                                                        | 0.398                          | 2247.94            | 893.58             | 0.069                          | 1759.14            | 121.96             |
| A_68_P26920442 | chr10:7446059-7446115                             | NM_011835:289           | Katna1        | INSIDE                 | 0.174                                                        | 0.630                          | 1481.08            | 932.78             | 0.109                          | 1104.77            | 120.80             |
| A_68_P20025036 | chr1:9957153-9957197                              | NM_145692:42027         | Lrrc67        | DOWNSTREAM             | 0.174                                                        | 0.703                          | 1286.63            | 905.00             | 0.123                          | 993.52             | 121.82             |
| A_68_P29718025 | chr14:73924796-73924840                           | NM_172527:23231         | Nudt15        | INSIDE                 | 0.174                                                        | 0.663                          | 5473.03            | 3631.03            | 0.115                          | 3869.57            | 445.76             |
| A_68_P20768470 | chr1:162722306-162722353                          | NM_013862:740           | Rabgap11      | INSIDE                 | 0.174                                                        | 1.430                          | 1370.04            | 1959.76            | 0.249                          | 1051.90            | 261.79             |
| A_68_P25950469 | chr8:72736531-72736577                            | NM_001007570:-374       | Sle25a42      | PROMOTER               | 0.174                                                        | 0.598                          | 1531.97            | 915.90             | 0.104                          | 1155.40            | 119.93             |
| A_68_P21608669 | chr2:126379290-126379337                          | NM_011978:554           | Sle27a2       | INSIDE                 | 0.174                                                        | 0.554                          | 1744.95            | 967.04             | 0.096                          | 1200.39            | 115.56             |
| A_68_P28101955 | chr11:106362323-106362370                         | NR_030703:42            | Snord104      | INSIDE                 | 0.174                                                        | 0.626                          | 3342.72            | 2092.04            | 0.109                          | 2440.65            | 265.07             |
| A_68_P25840857 | chr8:48373280-48373324                            | NM_001114311:1454       | Stox2         | INSIDE                 | 0.174                                                        | 0.625                          | 1857.49            | 1160.78            | 0.108                          | 1276.11            | 138.37             |
| A_68_P26022397 | chr8:87396203-87396247                            | NM_001168244:68         | Sycc2         | INSIDE                 | 0.174                                                        | 1.579                          | 8319.12            | 13136.59           | 0.275                          | 5430.36            | 1492.67            |
| A_68_P30479872 | chr15:99223536-99223580                           | NM_001171035:-91        | Tmbim6        | PROMOTER               | 0.174                                                        | 0.487                          | 2046.14            | 997.19             | 0.085                          | 1450.77            | 123.22             |
| A_68_P27846982 | chr11:60988669-60988713                           | NM_001004143:-129       | Usp22         | PROMOTER               | 0.174                                                        | 0.704                          | 1374.08            | 967.17             | 0.123                          | 978.49             | 119.89             |
| A_68_P27469300 | chr10:114821835-114821879                         | NM_001033261:-158       | Zfc3h1        | DIVERGENT_PROMOTER     | 0.174                                                        | 0.588                          | 1675.89            | 985.64             | 0.102                          | 1184.83            | 121.21             |
| A_68_P29102609 | chr13:65380152-65380198                           | NM_178364:13            | Zfp369        | INSIDE                 | 0.174                                                        | 0.544                          | 1622.39            | 882.81             | 0.095                          | 1278.17            | 121.07             |
| A_68_P26430752 | chr9:37267961-37268005                            |                         |               | Unknown                | 0.174                                                        | 0.704                          | 2259.43            | 1591.71            | 0.122                          | 1912.72            | 234.10             |
| A_68_P25890692 | chr8:59820063-59820107                            | ENSMUST00000132988:9170 |               | DOWNSTREAM             | 0.174                                                        | 0.646                          | 1300.26            | 839.68             | 0.113                          | 1055.04            | 118.80             |
| A_68_P24039806 | chr5:121062707-121062753                          | NM_029096:-132          | 1110008J03Rik | DIVERGENT_PROMOTER     | 0.173                                                        | 0.605                          | 1671.34            | 1011.87            | 0.104                          | 1153.56            | 120.49             |

| ProbeName      | Target position of probe on CpG island microarray | TargetID           | GeneSymbol | CpG island Description | Ratio of relative methylation (TiO <sub>2</sub> -NP/Vehicle) | Sham group                     |                    |                    | TiO <sub>2</sub> -H group      |                    |                    |
|----------------|---------------------------------------------------|--------------------|------------|------------------------|--------------------------------------------------------------|--------------------------------|--------------------|--------------------|--------------------------------|--------------------|--------------------|
|                |                                                   |                    |            |                        |                                                              | Relative methylation (Cy5/Cy3) | Cy3 signal (Input) | Cy5 signal (MeDIP) | Relative methylation (Cy5/Cy3) | Cy3 signal (Input) | Cy5 signal (MeDIP) |
| A_68_P23299526 | chr4:129663110-129663154                          | NM_001199696:811   | Bai2       | INSIDE                 | 0.173                                                        | 1.847                          | 10078.00           | 18611.84           | 0.319                          | 6203.11            | 1981.77            |
| A_68_P27980570 | chr11:84771638-84771682                           | NM_007607:405      | Car4       | INSIDE                 | 0.173                                                        | 0.465                          | 2011.08            | 935.28             | 0.081                          | 1491.58            | 120.23             |
| A_68_P28059227 | chr11:98769369-98769413                           | NM_011799:-74      | Cdc6       | PROMOTER               | 0.173                                                        | 2.564                          | 6792.48            | 17416.08           | 0.444                          | 4223.49            | 1874.92            |
| A_68_P31620305 | chr18:35990289-35990333                           | NM_133687:839      | Cxcr5      | INSIDE                 | 0.173                                                        | 0.572                          | 4581.05            | 2620.95            | 0.099                          | 3103.76            | 307.44             |
| A_68_P31286851 | chr17:63231331-63231377                           | NM_010109:-688     | Efnaf5     | PROMOTER               | 0.173                                                        | 0.682                          | 1466.36            | 1000.36            | 0.118                          | 1025.23            | 121.29             |
| A_68_P20351050 | chr1:74932235-74932279                            | NM_153111:-274     | Fev        | PROMOTER               | 0.173                                                        | 2.211                          | 6752.79            | 14933.72           | 0.383                          | 4043.83            | 1549.35            |
| A_68_P23356006 | chr4:139665293-139665352                          | NM_198610:137404   | Igslf21    | INSIDE                 | 0.173                                                        | 0.509                          | 1799.44            | 915.72             | 0.088                          | 1372.39            | 120.92             |
| A_68_P23138265 | chr4:98062281-98062325                            | NM_001005784:-214  | Inadl      | PROMOTER               | 0.173                                                        | 0.541                          | 1634.56            | 885.02             | 0.094                          | 1289.39            | 120.79             |
| A_68_P20804906 | chr1:169324243-169324289                          | NM_025569:-338     | Mgst3      | PROMOTER               | 0.173                                                        | 0.684                          | 1301.21            | 889.97             | 0.118                          | 1005.60            | 119.00             |
| A_68_P25261467 | chr7:86650381-86650425                            | NR_029818:253      | Mir9-3     | DOWNSTREAM             | 0.173                                                        | 0.587                          | 1804.05            | 1058.83            | 0.101                          | 1356.12            | 137.31             |
| A_68_P25993841 | chr8:81819136-81819180                            | NM_133823:-303     | Mmaa       | PROMOTER               | 0.173                                                        | 0.565                          | 1655.96            | 936.07             | 0.098                          | 1177.56            | 115.08             |
| A_68_P25954854 | chr8:73430001-73430045                            | NM_173013:150      | Mtap1s     | INSIDE                 | 0.173                                                        | 0.716                          | 9666.59            | 6923.16            | 0.124                          | 6411.88            | 792.74             |
| A_68_P26815491 | chr9:108470017-108470061                          | NM_023247:-365     | Ndufaf3    | DIVERGENT_PROMOTER     | 0.173                                                        | 0.533                          | 1780.83            | 948.68             | 0.092                          | 1342.15            | 123.59             |
| A_68_P27285558 | chr10:80261134-80261187                           | NM_023900:211      | Plekhl1    | INSIDE                 | 0.173                                                        | 0.625                          | 1549.63            | 967.88             | 0.108                          | 1119.19            | 120.71             |
| A_68_P27282698 | chr10:79819083-79819127                           | NM_183152:-99      | Plk5       | DIVERGENT_PROMOTER     | 0.173                                                        | 0.580                          | 1689.64            | 980.34             | 0.101                          | 1210.77            | 121.87             |
| A_68_P30379305 | chr15:81560318-81560371                           | NM_001146174:5     | Rangap1    | INSIDE                 | 0.173                                                        | 0.717                          | 1472.99            | 1056.85            | 0.124                          | 946.00             | 117.49             |
| A_68_P24533018 | chr6:70741721-70741765                            | NM_009075:427      | Rpia       | INSIDE                 | 0.173                                                        | 0.510                          | 2330.13            | 1188.80            | 0.088                          | 1759.33            | 155.01             |
| A_68_P26660234 | chr9:78435451-78435495                            | NM_172773:362      | Slc17a5    | INSIDE                 | 0.173                                                        | 0.605                          | 1398.56            | 846.38             | 0.105                          | 1128.57            | 118.50             |
| A_68_P20353638 | chr1:75379009-75379053                            | NM_001085370:-3154 | Speg       | PROMOTER               | 0.173                                                        | 0.692                          | 7252.21            | 5019.83            | 0.120                          | 4874.62            | 583.64             |
| A_68_P32242102 | chrX:7752757-7752806                              | NM_001166437:526   | Tbc1d25    | INSIDE                 | 0.173                                                        | 1.792                          | 950.57             | 1703.61            | 0.311                          | 377.75             | 117.32             |
| A_68_P20261290 | chr1:59030112-59030156                            | NM_172406:192      | Trak2      | INSIDE                 | 0.173                                                        | 0.576                          | 1347.13            | 775.38             | 0.099                          | 1223.76            | 121.66             |
| A_68_P20135165 | chr1:33871553-33871598                            | NM_133817:-303     | Zfp451     | PROMOTER               | 0.173                                                        | 0.688                          | 1734.76            | 1194.10            | 0.119                          | 1370.44            | 163.41             |
| A_68_P20565672 | chr1:123074540-123074584                          | AK045543:90512     |            | INSIDE                 | 0.173                                                        | 0.495                          | 1582.24            | 782.61             | 0.086                          | 1399.12            | 119.96             |
| A_68_P23315176 | chr4:132567687-132567731                          | NM_146155:288      | Ahdcd1     | INSIDE                 | 0.172                                                        | 1.466                          | 1685.86            | 2471.02            | 0.251                          | 1289.17            | 324.19             |
| A_68_P27646188 | chr11:23397444-23397495                           | NM_172391:477      | Ahsa2      | INSIDE                 | 0.172                                                        | 0.686                          | 1131.32            | 775.95             | 0.118                          | 1041.98            | 122.75             |
| A_68_P28553309 | chr12:77426063-77426107                           | NM_001101471:207   | Akap5      | INSIDE                 | 0.172                                                        | 0.552                          | 2337.65            | 1289.53            | 0.095                          | 1749.51            | 165.95             |
| A_68_P27847520 | chr11:61081060-61081115                           | NM_007437:-458     | Aldh3a2    | PROMOTER               | 0.172                                                        | 0.455                          | 2115.04            | 961.48             | 0.078                          | 1541.58            | 120.82             |
| A_68_P26595471 | chr9:66682687-66682731                            | NM_026674:-195     | Aph1c      | PROMOTER               | 0.172                                                        | 0.609                          | 1452.99            | 884.84             | 0.105                          | 1197.01            | 125.27             |
| A_68_P26158730 | chr8:112261101-112261147                          | NM_001080930:515   | Atxn1l     | INSIDE                 | 0.172                                                        | 1.711                          | 788.99             | 1349.74            | 0.295                          | 543.84             | 160.18             |
| A_68_P20794610 | chr1:167391699-167391743                          | NM_027430:382      | Brp44      | INSIDE                 | 0.172                                                        | 0.544                          | 1884.09            | 1025.75            | 0.093                          | 1323.72            | 123.61             |
| A_68_P20408511 | chr1:87691108-87691154                            | NM_133781:1109     | Cab39      | INSIDE                 | 0.172                                                        | 0.546                          | 1562.43            | 852.44             | 0.094                          | 1248.16            | 117.17             |
| A_68_P23196911 | chr4:108292854-108292898                          | NM_177045:316      | Ce2d1b     | INSIDE                 | 0.172                                                        | 0.657                          | 1710.43            | 1124.28            | 0.113                          | 1164.67            | 131.62             |
| A_68_P26814988 | chr9:108363033-108363077                          | NM_133744:206      | Ccdc71     | INSIDE                 | 0.172                                                        | 0.549                          | 1732.60            | 951.35             | 0.094                          | 1255.02            | 118.20             |
| A_68_P31792968 | chr18:67800428-67800477                           | NM_001081073:538   | Cep76      | INSIDE                 | 0.172                                                        | 0.670                          | 1353.59            | 906.32             | 0.115                          | 1046.08            | 120.56             |
| A_68_P27551032 | chr11:3166258-3166302                             | NM_007879:109      | Drg1       | INSIDE                 | 0.172                                                        | 0.690                          | 3620.02            | 2497.50            | 0.118                          | 2488.61            | 294.72             |
| A_68_P30497082 | chr15:102126996-102127044                         | NM_001014976:297   | Esp1l      | INSIDE                 | 0.172                                                        | 0.619                          | 1374.00            | 850.32             | 0.106                          | 1125.71            | 119.88             |
| A_68_P28493249 | chr12:66067546-66067594                           | NM_177805:842      | Fam179b    | INSIDE                 | 0.172                                                        | 0.632                          | 1670.05            | 1055.36            | 0.109                          | 1100.07            | 119.66             |
| A_68_P23607762 | chr5:36807361-36807405                            | NM_024478:-451     | Grpel1     | PROMOTER               | 0.172                                                        | 0.684                          | 1366.16            | 935.00             | 0.118                          | 985.94             | 115.89             |
| A_68_P21628930 | chr2:130109870-130109914                          | NM_130884:295      | Idh3b      | INSIDE                 | 0.172                                                        | 0.606                          | 6715.17            | 4072.51            | 0.104                          | 4499.49            | 469.42             |
| A_68_P25656213 | chr8:11556085-11556129                            | NM_011919:41       | Ingl1      | INSIDE                 | 0.172                                                        | 0.477                          | 1844.84            | 879.72             | 0.082                          | 1463.77            | 120.37             |
| A_68_P24381996 | chr6:39156448-39156492                            | NM_001033430:302   | Jhdm1d     | INSIDE                 | 0.172                                                        | 0.497                          | 4031.18            | 2004.31            | 0.085                          | 2675.98            | 228.51             |
| A_68_P27828607 | chr11:57822062-57822109                           | NM_028451:-480     | Larp1      | PROMOTER               | 0.172                                                        | 0.630                          | 1418.58            | 893.35             | 0.108                          | 1154.91            | 124.84             |
| A_68_P25285304 | chr7:91033159-91033207                            | NM_030705:-331     | Mesdc1     | DIVERGENT_PROMOTER     | 0.172                                                        | 0.583                          | 1623.03            | 945.70             | 0.100                          | 1225.91            | 122.59             |
| A_68_P32252894 | chrX:10295292-10295336                            | NM_001166635:824   | Mid1pl1    | INSIDE                 | 0.172                                                        | 1.365                          | 2864.83            | 3910.65            | 0.235                          | 1086.57            | 255.37             |
| A_68_P27555852 | chr11:4035495-4035539                             | NR_037220:-3850    | Mir3060    | PROMOTER               | 0.172                                                        | 0.532                          | 1746.82            | 929.11             | 0.092                          | 1272.87            | 116.62             |
| A_68_P29689072 | chr14:68701679-68701726                           | NM_010910:-238     | Nefl       | PROMOTER               | 0.172                                                        | 1.428                          | 1057.46            | 1510.57            | 0.245                          | 821.26             | 201.25             |
| A_68_P20937428 | chr1:193141556-193141600                          | NM_025424:419      | Nenf       | INSIDE                 | 0.172                                                        | 0.636                          | 1542.92            | 981.71             | 0.109                          | 1296.83            | 141.61             |
| A_68_P32134165 | chr19:44825072-44825116                           | NM_011037:-6789    | Pax2       | PROMOTER               | 0.172                                                        | 1.527                          | 2932.08            | 4477.73            | 0.263                          | 1876.06            | 492.54             |
| A_68_P25666151 | chr8:13104540-13104584                            | NM_178708:781      | Pcid2      | INSIDE                 | 0.172                                                        | 0.596                          | 1830.38            | 1090.26            | 0.103                          | 1440.76            | 147.81             |
| A_68_P23393507 | chr4:147661524-147661570                          | NM_001083342:528   | Ptchd2     | INSIDE                 | 0.172                                                        | 0.693                          | 1340.86            | 929.17             | 0.119                          | 1016.98            | 121.46             |
| A_68_P24537774 | chr6:71658275-71658319                            | NM_178608:622      | Reep1      | INSIDE                 | 0.172                                                        | 0.446                          | 1735.98            | 773.43             | 0.077                          | 1525.65            | 116.74             |



| ProbeName      | Target position of probe on CpG island microarray | TargetID                | GeneSymbol    | CpG island Description | Ratio of relative methylation (TiO <sub>2</sub> -NP/Vehicle) | Sham group                     |                    |                    | TiO <sub>2</sub> -H group      |                    |                    |
|----------------|---------------------------------------------------|-------------------------|---------------|------------------------|--------------------------------------------------------------|--------------------------------|--------------------|--------------------|--------------------------------|--------------------|--------------------|
|                |                                                   |                         |               |                        |                                                              | Relative methylation (Cy5/Cy3) | Cy3 signal (Input) | Cy5 signal (MeDIP) | Relative methylation (Cy5/Cy3) | Cy3 signal (Input) | Cy5 signal (MeDIP) |
| A_68_P22871359 | chr4:43395245-43395289                            | NM_001037709:413        | Rusc2         | INSIDE                 | 0.172                                                        | 0.676                          | 1726.81            | 1166.66            | 0.116                          | 1393.29            | 162.11             |
| A_68_P27827566 | chr11:57614919-57614965                           | NM_001081168:-196       | Sap30l        | PROMOTER               | 0.172                                                        | 1.782                          | 1897.59            | 3381.73            | 0.306                          | 1183.28            | 361.79             |
| A_68_P24092946 | chr5:130731035-130731079                          | NM_023248:276           | Sbds          | INSIDE                 | 0.172                                                        | 0.644                          | 5110.85            | 3292.95            | 0.111                          | 3901.95            | 432.30             |
| A_68_P31142314 | chr17:31993086-31993130                           | NM_010831:-371          | Sik1          | PROMOTER               | 0.172                                                        | 0.504                          | 1973.59            | 994.89             | 0.087                          | 1737.94            | 150.89             |
| A_68_P31108361 | chr17:26250094-26250138                           | NM_021793:-144          | Tmem8         | PROMOTER               | 0.172                                                        | 0.673                          | 1159.93            | 780.64             | 0.115                          | 1061.02            | 122.53             |
| A_68_P32320542 | chrX:34414678-34414722                            | NM_019668:340           | Ube2a         | INSIDE                 | 0.172                                                        | 1.843                          | 976.13             | 1798.99            | 0.317                          | 387.01             | 122.84             |
| A_68_P31257916 | chr17:56856619-56856667                           | NM_178926:-298          | Vmac          | PROMOTER               | 0.172                                                        | 3.875                          | 7531.15            | 29185.39           | 0.666                          | 4225.32            | 2812.82            |
| A_68_P22394204 | chr3:104765246-104765290                          | NM_009520:-641          | Wnt2b         | PROMOTER               | 0.172                                                        | 0.649                          | 1303.97            | 846.77             | 0.112                          | 1058.28            | 118.00             |
| A_68_P27541963 | chr10:127984584-127984628                         | NM_134003:194           | Zc3h10        | INSIDE                 | 0.172                                                        | 1.435                          | 2103.89            | 3018.19            | 0.247                          | 1405.73            | 346.62             |
| A_68_P24155790 | chr5:144031255-144031299                          | NM_017467:425           | Zfp316        | INSIDE                 | 0.172                                                        | 0.612                          | 1471.81            | 900.28             | 0.105                          | 1108.29            | 116.69             |
| A_68_P21426270 | chr2:91895456-91895502                            | ENSMUST00000123840:4048 |               | INSIDE                 | 0.172                                                        | 0.548                          | 1484.59            | 813.23             | 0.094                          | 1248.95            | 117.46             |
| A_68_P24463220 | chr6:54379822-54379866                            | NR_033635:371           | 9130019P16Rik | INSIDE                 | 0.171                                                        | 0.493                          | 1713.98            | 844.41             | 0.084                          | 1433.43            | 120.68             |
| A_68_P26397642 | chr9:30729620-30729675                            | NM_001024139:390        | Adams15       | INSIDE                 | 0.171                                                        | 0.599                          | 1573.92            | 943.39             | 0.102                          | 1205.69            | 123.52             |
| A_68_P27282647 | chr10:79811365-79811409                           | NM_001113548:-195       | Adams15       | DIVERGENT_PROMOTER     | 0.171                                                        | 0.568                          | 1666.32            | 946.24             | 0.097                          | 1236.10            | 119.81             |
| A_68_P27892735 | chr11:68859244-68859288                           | NM_011496:122           | Aurkb         | INSIDE                 | 0.171                                                        | 0.425                          | 3872.89            | 1647.01            | 0.073                          | 2824.15            | 205.58             |
| A_68_P32364064 | chrX:45698666-45698710                            | NM_178782:4154          | Bcor1l        | INSIDE                 | 0.171                                                        | 2.431                          | 1583.53            | 3850.12            | 0.415                          | 827.91             | 343.61             |
| A_68_P30388922 | chr15:83357128-83357179                           | NM_007546:-138          | Bik           | PROMOTER               | 0.171                                                        | 0.618                          | 1537.68            | 950.90             | 0.106                          | 1104.36            | 116.61             |
| A_68_P29413818 | chr14:13655644-13655688                           | NM_001042617:-73        | Cadps         | PROMOTER               | 0.171                                                        | 0.411                          | 2506.75            | 1031.03            | 0.070                          | 2001.49            | 140.55             |
| A_68_P32287127 | chrX:19638262-19638306                            | NM_021715:1589          | Chst7         | INSIDE                 | 0.171                                                        | 1.581                          | 875.30             | 1383.85            | 0.271                          | 432.07             | 117.11             |
| A_68_P32567796 | chrX:99445717-99445761                            | NM_007709:1370          | Cited1        | INSIDE                 | 0.171                                                        | 1.639                          | 980.81             | 1607.14            | 0.281                          | 426.80             | 119.91             |
| A_68_P24600270 | chr6:84534486-84534530                            | NM_175475:9296          | Cyp26b1       | INSIDE                 | 0.171                                                        | 0.698                          | 1418.90            | 989.91             | 0.119                          | 1227.07            | 146.30             |
| A_68_P20825279 | chr1:172838779-172838823                          | NM_001029984:4272       | Fer1b         | INSIDE                 | 0.171                                                        | 0.650                          | 1961.31            | 1274.92            | 0.111                          | 1504.44            | 167.14             |
| A_68_P28083436 | chr11:102978646-102978690                         | NM_138753:1030          | Hexim1        | INSIDE                 | 0.171                                                        | 0.598                          | 1671.62            | 1000.41            | 0.102                          | 1348.68            | 137.80             |
| A_68_P23333247 | chr4:135867486-135867530                          | NM_028871:618           | Hnmp1r        | INSIDE                 | 0.171                                                        | 0.698                          | 3342.59            | 2331.65            | 0.119                          | 2477.62            | 295.06             |
| A_68_P23332244 | chr4:135691181-135691230                          | NM_008321:-8531         | Id3           | PROMOTER               | 0.171                                                        | 1.592                          | 548.78             | 873.47             | 0.272                          | 421.95             | 114.84             |
| A_68_P25310385 | chr7:97089281-97089328                            | NM_026304:391           | l7Rn6         | INSIDE                 | 0.171                                                        | 0.728                          | 3396.19            | 2474.01            | 0.124                          | 2516.93            | 312.98             |
| A_68_P24993784 | chr7:20109810-20109854                            | NM_027116:5753          | Nkpd1         | INSIDE                 | 0.171                                                        | 0.455                          | 1981.77            | 901.20             | 0.078                          | 1583.94            | 123.46             |
| A_68_P25096457 | chr7:53289487-53289535                            | NM_153057:445           | Nomo1         | INSIDE                 | 0.171                                                        | 0.658                          | 1670.73            | 1098.71            | 0.112                          | 1259.93            | 141.59             |
| A_68_P20413377 | chr1:88566126-88566173                            | NM_010933:999           | Nppe          | INSIDE                 | 0.171                                                        | 0.656                          | 1373.05            | 901.25             | 0.112                          | 1121.32            | 125.56             |
| A_68_P21820250 | chr2:164704772-164704816                          | NM_146129:-73           | Pcif1         | PROMOTER               | 0.171                                                        | 0.620                          | 1393.16            | 864.05             | 0.106                          | 1130.88            | 120.09             |
| A_68_P32464981 | chrX:71069831-71069875                            | NM_001029868:456        | Pdzd4         | INSIDE                 | 0.171                                                        | 1.688                          | 1122.43            | 1894.74            | 0.288                          | 528.09             | 152.05             |
| A_68_P24757362 | chr6:113027834-113027882                          | NM_028385:226           | Setd5         | INSIDE                 | 0.171                                                        | 0.685                          | 1325.64            | 907.99             | 0.117                          | 1037.87            | 121.43             |
| A_68_P29512055 | chr14:32248911-32248955                           | NM_011894:287           | Sh3bp5        | INSIDE                 | 0.171                                                        | 0.372                          | 2699.92            | 1005.53            | 0.064                          | 1824.95            | 116.34             |
| A_68_P28151694 | chr11:115024434-115024480                         | NM_012030:-198          | Sle9a3r1      | PROMOTER               | 0.171                                                        | 0.626                          | 1464.21            | 916.70             | 0.107                          | 1140.40            | 121.85             |
| A_68_P31381748 | chr17:80606129-80606175                           | NM_001195485:493        | Srsf7         | INSIDE                 | 0.171                                                        | 1.517                          | 4212.40            | 6389.69            | 0.260                          | 2651.26            | 689.30             |
| A_68_P24817210 | chr6:124779618-124779662                          | NM_013700:-175          | Usp5          | DIVERGENT_PROMOTER     | 0.171                                                        | 0.594                          | 2734.83            | 1623.20            | 0.102                          | 1951.57            | 198.61             |
| A_68_P32290858 | chrX:20539135-20539180                            | NM_013840:-53           | Uxt           | DIVERGENT_PROMOTER     | 0.171                                                        | 2.121                          | 1155.39            | 2450.36            | 0.362                          | 473.19             | 171.34             |
| A_68_P30476456 | chr15:98619939-98619989                           | NM_021279:-323          | Wnt1          | PROMOTER               | 0.171                                                        | 1.510                          | 678.62             | 1024.83            | 0.259                          | 452.29             | 117.00             |
| A_68_P30506408 | chr16:3744081-3744125                             | NM_148924:4             | Zfp263        | INSIDE                 | 0.171                                                        | 0.548                          | 2998.60            | 1643.21            | 0.094                          | 2308.15            | 215.88             |
| A_68_P24165134 | chr5:146041748-146041800                          | NM_001081431:-2437      | Zfp498        | PROMOTER               | 0.171                                                        | 0.552                          | 1481.40            | 817.50             | 0.094                          | 1286.94            | 121.57             |
| A_68_P28818474 | chr13:9763095-9763139                             | NM_001199141:1444       | Zmynd11       | INSIDE                 | 0.171                                                        | 0.476                          | 2344.92            | 1117.22            | 0.081                          | 1766.11            | 143.52             |
| A_68_P25459708 | chr7:125856496-125856541                          | NM_182995:394           | 6330503K22Rik | INSIDE                 | 0.170                                                        | 0.584                          | 2112.61            | 1234.70            | 0.099                          | 1517.05            | 150.82             |
| A_68_P21630552 | chr2:130406411-130406455                          | NM_009732:1845          | Avp           | INSIDE                 | 0.170                                                        | 0.685                          | 1598.44            | 1095.20            | 0.116                          | 1039.70            | 120.99             |
| A_68_P30588544 | chr16:20622405-20622449                           | NM_028420:-1075         | Camk2n2       | DIVERGENT_PROMOTER     | 0.170                                                        | 0.624                          | 1347.74            | 840.42             | 0.106                          | 1107.61            | 117.49             |
| A_68_P23455496 | chr5:5380045-5380094                              | NM_011074:182           | Cdk14         | INSIDE                 | 0.170                                                        | 0.572                          | 1663.32            | 951.24             | 0.097                          | 1270.44            | 123.40             |
| A_68_P23252016 | chr4:120243027-120243071                          | NM_016748:-167          | Ctsp          | PROMOTER               | 0.170                                                        | 0.552                          | 2445.91            | 1351.29            | 0.094                          | 1616.25            | 151.68             |
| A_68_P20863709 | chr1:180336540-180336584                          | NM_026626:551           | Efcab2        | INSIDE                 | 0.170                                                        | 0.458                          | 3807.40            | 1743.50            | 0.078                          | 2925.00            | 227.43             |
| A_68_P25766298 | chr8:33994085-33994129                            | NM_001177589:66392      | Gm3985        | DOWNSTREAM             | 0.170                                                        | 0.496                          | 1919.57            | 952.71             | 0.084                          | 1459.04            | 123.19             |
| A_68_P23778715 | chr5:69983278-69983322                            | NM_001038015:224        | Gnpda2        | INSIDE                 | 0.170                                                        | 0.698                          | 2200.94            | 1535.44            | 0.118                          | 1745.74            | 206.77             |
| A_68_P20453277 | chr1:94998219-94998263                            | NM_001110315:202        | Kif1a         | INSIDE                 | 0.170                                                        | 0.622                          | 1535.58            | 955.02             | 0.106                          | 1147.99            | 121.25             |
| A_68_P25780627 | chr8:36650640-36650684                            | NM_001081279:-189       | Mhas1         | PROMOTER               | 0.170                                                        | 0.626                          | 1764.56            | 1105.26            | 0.106                          | 1344.87            | 142.89             |

| ProbeName      | Target position of probe on CpG island microarray | TargetID                 | GeneSymbol    | CpG island Description | Ratio of relative methylation (TiO <sub>2</sub> -NP/Vehicle) | Sham group                     |                    |                    | TiO <sub>2</sub> -H group      |                    |                    |
|----------------|---------------------------------------------------|--------------------------|---------------|------------------------|--------------------------------------------------------------|--------------------------------|--------------------|--------------------|--------------------------------|--------------------|--------------------|
|                |                                                   |                          |               |                        |                                                              | Relative methylation (Cy5/Cy3) | Cy3 signal (Input) | Cy5 signal (MeDIP) | Relative methylation (Cy5/Cy3) | Cy3 signal (Input) | Cy5 signal (MeDIP) |
| A_68_P30476734 | chr15:98661277-98661332                           | NM_016781:635            | Prkg1         | INSIDE                 | 0.170                                                        | 0.617                          | 1471.75            | 907.61             | 0.105                          | 1094.16            | 114.87             |
| A_68_P23294616 | chr4:128725929-128725973                          | NM_029219:-9564          | Rnf19b        | PROMOTER               | 0.170                                                        | 0.668                          | 1735.83            | 1159.41            | 0.114                          | 1393.20            | 158.41             |
| A_68_P23417944 | chr4:151687118-151687162                          | NM_001033489:5594        | Rnf207        | INSIDE                 | 0.170                                                        | 0.716                          | 3158.26            | 2259.78            | 0.122                          | 2062.98            | 251.32             |
| A_68_P27675741 | chr11:29593764-29593808                           | NM_194051:13             | Rtn4          | INSIDE                 | 0.170                                                        | 0.606                          | 3599.56            | 2180.48            | 0.103                          | 2723.51            | 280.55             |
| A_68_P28535262 | chr12:74146492-74146537                           | NM_009189:1185           | Six1          | INSIDE                 | 0.170                                                        | 0.666                          | 2732.43            | 1820.79            | 0.113                          | 1938.38            | 219.78             |
| A_68_P30955583 | chr16:90220671-90220715                           | NM_011434:-294           | Sod1          | PROMOTER               | 0.170                                                        | 0.566                          | 1703.51            | 963.76             | 0.096                          | 1208.35            | 116.14             |
| A_68_P25094675 | chr7:52970796-52970843                            | NM_020011:-242           | Sphk2         | PROMOTER               | 0.170                                                        | 0.709                          | 1390.39            | 986.07             | 0.120                          | 974.67             | 117.26             |
| A_68_P31123423 | chr17:28758242-28758293                           | NM_016795:1132           | Srpk1         | INSIDE                 | 0.170                                                        | 0.582                          | 1647.29            | 959.35             | 0.099                          | 1251.97            | 123.87             |
| A_68_P25388365 | chr7:111650415-111650462                          | NM_001167828:5925        | Trim30d       | INSIDE                 | 0.170                                                        | 0.630                          | 1362.31            | 857.84             | 0.107                          | 1107.63            | 118.37             |
| A_68_P21957615 | chr3:14611165-14611209                            | NM_001099674:70          | 1810022K09Rik | INSIDE                 | 0.169                                                        | 1.627                          | 10250.23           | 16677.58           | 0.275                          | 6020.26            | 1657.59            |
| A_68_P27752256 | chr11:43589831-43589875                           | NM_007416:59982          | Adra1b        | INSIDE                 | 0.169                                                        | 0.528                          | 1676.76            | 885.01             | 0.089                          | 1353.69            | 120.75             |
| A_68_P26035014 | chr8:89994814-89994859                            | NM_019626:1655           | Cbln1         | INSIDE                 | 0.169                                                        | 0.540                          | 1620.93            | 875.25             | 0.091                          | 1331.72            | 121.85             |
| A_68_P22861618 | chr4:41261982-41262026                            | NM_026893:-70            | Deaf12        | PROMOTER               | 0.169                                                        | 0.636                          | 1582.37            | 1006.29            | 0.108                          | 1066.36            | 114.66             |
| A_68_P31930375 | chr19:5716486-5716534                             | NM_001114595:9807        | Ehbp111       | INSIDE                 | 0.169                                                        | 0.504                          | 1845.37            | 929.82             | 0.085                          | 1357.42            | 115.87             |
| A_68_P30356904 | chr15:77800920-77800964                           | NM_018749:312            | Eif3d         | INSIDE                 | 0.169                                                        | 0.429                          | 2066.94            | 886.70             | 0.073                          | 1592.48            | 115.63             |
| A_68_P31948839 | chr19:10257741-10257785                           | NM_146094:385            | Fads1         | INSIDE                 | 0.169                                                        | 0.606                          | 2386.06            | 1446.42            | 0.103                          | 1881.63            | 192.95             |
| A_68_P20351043 | chr1:74931488-74931534                            | NM_153111:472            | Fev           | INSIDE                 | 0.169                                                        | 0.476                          | 2040.17            | 971.48             | 0.080                          | 1514.48            | 121.80             |
| A_68_P26065130 | chr8:94880881-94880925                            | NM_018826:-792           | Irx5          | DIVERGENT_PROMOTER     | 0.169                                                        | 0.542                          | 4847.98            | 2627.21            | 0.092                          | 3183.37            | 292.31             |
| A_68_P22530170 | chr3:130814530-130814579                          | NM_010703:1166           | Lef1          | INSIDE                 | 0.169                                                        | 0.713                          | 1306.94            | 931.43             | 0.121                          | 1001.02            | 120.63             |
| A_68_P32470782 | chrX:72376286-72376330                            | NM_008621:-20            | Mpp1          | PROMOTER               | 0.169                                                        | 1.549                          | 3268.88            | 5064.48            | 0.262                          | 1340.62            | 350.77             |
| A_68_P23545730 | chr5:24605328-24605372                            | NM_145401:1110           | Prkg2         | INSIDE                 | 0.169                                                        | 1.411                          | 1249.85            | 1763.50            | 0.238                          | 925.14             | 220.40             |
| A_68_P25842225 | chr8:48619443-48619487                            | NM_203507:466            | Rwdd4a        | INSIDE                 | 0.169                                                        | 0.677                          | 1489.95            | 1009.30            | 0.114                          | 1051.65            | 120.14             |
| A_68_P24061230 | chr5:124874812-124874856                          | NM_001081203:1089        | Sbno1         | INSIDE                 | 0.169                                                        | 0.571                          | 3945.66            | 2252.86            | 0.096                          | 2651.15            | 255.52             |
| A_68_P32127976 | chr19:43748957-43749001                           | NM_145156:393            | Sle25a28      | INSIDE                 | 0.169                                                        | 0.510                          | 1858.26            | 947.25             | 0.086                          | 1352.81            | 116.60             |
| A_68_P31712046 | chr18:53405025-53405069                           | NM_029394:-269           | Snx24         | PROMOTER               | 0.169                                                        | 0.490                          | 1942.13            | 951.15             | 0.083                          | 1472.37            | 122.03             |
| A_68_P22199717 | chr3:65196220-65196264                            | NM_026155:233            | Ssr3          | INSIDE                 | 0.169                                                        | 0.720                          | 6823.25            | 4911.23            | 0.122                          | 5046.74            | 613.64             |
| A_68_P23278807 | chr4:125879742-125879788                          | NM_146153:190            | Thrap3        | INSIDE                 | 0.169                                                        | 0.589                          | 2022.15            | 1191.30            | 0.100                          | 1432.91            | 142.76             |
| A_68_P30160401 | chr15:40487098-40487142                           | NM_011766:533            | Zfpm2         | INSIDE                 | 0.169                                                        | 0.680                          | 1427.21            | 970.91             | 0.115                          | 1061.15            | 121.88             |
| A_68_P21099287 | chr2:29606956-29607000                            | ENSMUST00000113812:-3415 |               | PROMOTER               | 0.169                                                        | 0.571                          | 2010.71            | 1149.11            | 0.097                          | 1494.34            | 144.52             |
| A_68_P21810973 | chr2:163029390-163029446                          | ENSMUST00000128999:-870  |               | PROMOTER               | 0.169                                                        | 0.742                          | 2589.00            | 1921.38            | 0.125                          | 1850.47            | 232.05             |
| A_68_P26422477 | chr9:35228776-35228820                            | ENSMUST00000137200:-340  |               | PROMOTER               | 0.169                                                        | 0.482                          | 1846.88            | 890.69             | 0.081                          | 1481.20            | 120.43             |
| A_68_P27675036 | chr11:29447352-29447406                           | NM_001163521:-571        | 1700034F02Rik | PROMOTER               | 0.168                                                        | 0.691                          | 1265.71            | 874.46             | 0.116                          | 1063.16            | 123.63             |
| A_68_P27332753 | chr10:89194937-89194988                           | NM_025914:78             | Actr6         | INSIDE                 | 0.168                                                        | 0.521                          | 1795.15            | 935.48             | 0.087                          | 1382.16            | 120.83             |
| A_68_P32186057 | chr19:54120878-54120926                           | NM_007417:1231           | Adra2a        | INSIDE                 | 0.168                                                        | 0.536                          | 1918.46            | 1027.47            | 0.090                          | 1372.09            | 123.73             |
| A_68_P28025143 | chr11:92961409-92961453                           | NM_028296:827            | Car10         | INSIDE                 | 0.168                                                        | 1.628                          | 4195.42            | 6831.32            | 0.273                          | 2752.95            | 752.64             |
| A_68_P21583233 | chr2:121692537-121692581                          | NM_001205369:-147        | Casc4         | PROMOTER               | 0.168                                                        | 0.650                          | 1582.77            | 1029.49            | 0.109                          | 1109.67            | 121.50             |
| A_68_P24078736 | chr5:128113050-128113094                          | NM_177005:441            | Glt1d1        | INSIDE                 | 0.168                                                        | 0.527                          | 2456.25            | 1293.46            | 0.089                          | 1862.68            | 164.85             |
| A_68_P24156212 | chr5:144125779-144125823                          | NM_133355:214            | Grid2ip       | INSIDE                 | 0.168                                                        | 0.457                          | 2012.18            | 919.98             | 0.077                          | 1609.33            | 123.26             |
| A_68_P24186282 | chr5:150438837-150438890                          | NM_013559:27             | Hsph1         | INSIDE                 | 0.168                                                        | 0.493                          | 2255.05            | 1112.39            | 0.083                          | 1597.19            | 132.49             |
| A_68_P21137835 | chr2:35960385-35960443                            | NM_001083126:-834        | Lhx6          | PROMOTER               | 0.168                                                        | 0.634                          | 1477.68            | 937.11             | 0.106                          | 1118.38            | 119.09             |
| A_68_P21137750 | chr2:35949963-35950016                            | NM_001083126:9591        | Lhx6          | INSIDE                 | 0.168                                                        | 0.657                          | 1695.06            | 1113.25            | 0.110                          | 1196.99            | 132.17             |
| A_68_P32318077 | chrX:33870275-33870326                            | NM_028894:1897           | Lomr3         | INSIDE                 | 0.168                                                        | 1.844                          | 973.19             | 1794.96            | 0.309                          | 378.95             | 117.19             |
| A_68_P31130465 | chr17:30025201-30025252                           | NM_001081160:-399        | Mdga1         | PROMOTER               | 0.168                                                        | 0.458                          | 2153.69            | 986.16             | 0.077                          | 1512.45            | 116.44             |
| A_68_P31151559 | chr17:34162253-34162297                           | NR_029800:-237           | Mir219-1      | PROMOTER               | 0.168                                                        | 0.640                          | 2005.53            | 1284.41            | 0.108                          | 1479.66            | 159.47             |
| A_68_P30977847 | chr16:93832195-93832251                           | NM_001045529:-143        | More3         | PROMOTER               | 0.168                                                        | 0.605                          | 1539.24            | 931.50             | 0.101                          | 1154.19            | 117.05             |
| A_68_P32696398 | chrX:136406178-136406222                          | NM_001193309:-7          | More4         | PROMOTER               | 0.168                                                        | 1.980                          | 2753.63            | 5451.06            | 0.332                          | 1044.26            | 346.92             |
| A_68_P27969034 | chr11:82721872-82721916                           | NM_145431:3              | Nle1          | INSIDE                 | 0.168                                                        | 0.593                          | 1655.59            | 981.13             | 0.100                          | 1210.24            | 120.73             |
| A_68_P30728923 | chr16:45844322-45844366                           | NM_153412:147            | Phldb2        | INSIDE                 | 0.168                                                        | 0.559                          | 4648.33            | 2598.67            | 0.094                          | 3381.44            | 318.14             |
| A_68_P22518740 | chr3:128916656-128916700                          | NM_001042502:-176        | Pitx2         | PROMOTER               | 0.168                                                        | 0.372                          | 2754.32            | 1024.02            | 0.062                          | 2008.37            | 125.52             |
| A_68_P27568393 | chr11:6315493-6315540                             | NM_008907:-356           | Ppia          | PROMOTER               | 0.168                                                        | 0.679                          | 1431.78            | 972.87             | 0.114                          | 1044.41            | 119.53             |
| A_68_P27840803 | chr11:59919168-59919212                           | NM_009021:676            | Rai1          | INSIDE                 | 0.168                                                        | 0.674                          | 5339.83            | 3600.58            | 0.113                          | 4163.27            | 470.39             |

| ProbeName      | Target position of probe on CpG island microarray | TargetID               | GeneSymbol    | CpG island Description | Ratio of relative methylation (TiO <sub>2</sub> -NP/Vehicle) | Sham group                     |                    |                    | TiO <sub>2</sub> -H group      |                    |                    |
|----------------|---------------------------------------------------|------------------------|---------------|------------------------|--------------------------------------------------------------|--------------------------------|--------------------|--------------------|--------------------------------|--------------------|--------------------|
|                |                                                   |                        |               |                        |                                                              | Relative methylation (Cy5/Cy3) | Cy3 signal (Input) | Cy5 signal (MeDIP) | Relative methylation (Cy5/Cy3) | Cy3 signal (Input) | Cy5 signal (MeDIP) |
| A_68_P24777650 | chr6:116623776-116623820                          | NM_178045:56           | Rassf4        | INSIDE                 | 0.168                                                        | 0.732                          | 1966.25            | 1439.87            | 0.123                          | 1437.39            | 176.71             |
| A_68_P27096531 | chr10:42481959-42482003                           | NM_153055:679          | Sec63         | INSIDE                 | 0.168                                                        | 2.489                          | 2830.36            | 7045.36            | 0.418                          | 1743.99            | 728.62             |
| A_68_P20559395 | chr1:121809675-121809721                          | NM_175106:47           | Tmem177       | INSIDE                 | 0.168                                                        | 0.682                          | 1364.17            | 931.04             | 0.115                          | 1013.87            | 116.17             |
| A_68_P31257917 | chr17:56856713-56856757                           | NM_178926:-390         | Vmac          | PROMOTER               | 0.168                                                        | 2.180                          | 6992.44            | 15243.02           | 0.367                          | 4178.40            | 1532.51            |
| A_68_P30476477 | chr15:98622390-98622434                           | NM_021279:2125         | Wnt1          | INSIDE                 | 0.168                                                        | 0.584                          | 3621.06            | 2114.93            | 0.098                          | 2609.51            | 256.64             |
| A_68_P24164946 | chr5:145992407-145992453                          | NM_001083958:-153      | Zfp655        | PROMOTER               | 0.168                                                        | 0.497                          | 1853.86            | 920.47             | 0.083                          | 1411.20            | 117.60             |
| A_68_P31129448 | chr17:29854041-29854085                           | NM_001163741:-100      | 1110021J02Rik | PROMOTER               | 0.167                                                        | 1.646                          | 4708.75            | 7749.57            | 0.275                          | 3153.45            | 868.55             |
| A_68_P22350134 | chr3:96402650-96402694                            | NM_001024851:2114      | Ankrd34a      | INSIDE                 | 0.167                                                        | 0.582                          | 1875.84            | 1091.15            | 0.097                          | 1435.18            | 139.49             |
| A_68_P27892738 | chr11:68859556-68859600                           | NM_011496:434          | Aurkb         | INSIDE                 | 0.167                                                        | 0.703                          | 1338.53            | 941.36             | 0.117                          | 999.22             | 117.24             |
| A_68_P21087495 | chr2:27742216-27742260                            | NM_015734:294          | Col5a1        | INSIDE                 | 0.167                                                        | 0.528                          | 2987.33            | 1576.89            | 0.088                          | 2176.71            | 191.99             |
| A_68_P28186436 | chr11:120588411-120588455                         | NM_026428:163          | Dexr          | INSIDE                 | 0.167                                                        | 0.732                          | 3076.87            | 2253.17            | 0.122                          | 2260.95            | 276.71             |
| A_68_P27212431 | chr10:66999287-66999333                           | NM_010118:-1306        | Egr2          | PROMOTER               | 0.167                                                        | 0.567                          | 1741.96            | 987.37             | 0.095                          | 1249.12            | 118.39             |
| A_68_P28054685 | chr11:98010627-98010671                           | NM_028149:282          | Fbxl20        | INSIDE                 | 0.167                                                        | 0.494                          | 2679.41            | 1323.04            | 0.082                          | 2056.77            | 169.66             |
| A_68_P21107212 | chr2:30996536-30996580                            | NM_001038700:970       | Fnbp1         | INSIDE                 | 0.167                                                        | 0.663                          | 1847.81            | 1224.67            | 0.111                          | 1328.38            | 146.85             |
| A_68_P23892218 | chr5:92512396-92512440                            | NM_001080797:-475      | G3bp2         | PROMOTER               | 0.167                                                        | 0.609                          | 1476.13            | 898.72             | 0.102                          | 1127.90            | 114.73             |
| A_68_P21059052 | chr2:22479080-22479124                            | NM_008078:1256         | Gad2          | INSIDE                 | 0.167                                                        | 0.475                          | 1994.87            | 948.28             | 0.079                          | 1525.06            | 120.88             |
| A_68_P32383359 | chrX:49965740-49965784                            | NM_016697:1389         | Gpc3          | INSIDE                 | 0.167                                                        | 1.414                          | 1187.23            | 1678.79            | 0.237                          | 505.04             | 119.52             |
| A_68_P24864941 | chr6:135015515-135015567                          | NM_181444:-139         | Gprc5a        | PROMOTER               | 0.167                                                        | 0.528                          | 1948.37            | 1028.07            | 0.088                          | 1360.19            | 119.65             |
| A_68_P24589801 | chr6:82723921-82723966                            | NM_013820:505          | Hk2           | INSIDE                 | 0.167                                                        | 0.689                          | 1467.27            | 1011.14            | 0.115                          | 1037.19            | 119.63             |
| A_68_P21550148 | chr2:115887946-115888001                          | NM_001159569:2384      | Meis2         | INSIDE                 | 0.167                                                        | 0.631                          | 1793.58            | 1132.21            | 0.105                          | 1249.50            | 131.44             |
| A_68_P25285350 | chr7:91040523-91040567                            | NM_023403:35           | Mesdc2        | INSIDE                 | 0.167                                                        | 0.650                          | 4459.46            | 2898.61            | 0.108                          | 3202.79            | 347.19             |
| A_68_P30532724 | chr16:8471150-8471194                             | NM_146247:267          | Mettl22       | INSIDE                 | 0.167                                                        | 0.473                          | 2176.31            | 1028.99            | 0.079                          | 1670.76            | 131.59             |
| A_68_P25993842 | chr8:81819240-81819295                            | NM_133823:-412         | Mmaa          | PROMOTER               | 0.167                                                        | 0.521                          | 1868.13            | 972.73             | 0.087                          | 1329.92            | 115.54             |
| A_68_P22567224 | chr3:137806385-137806429                          | NM_001163457:-54       | Mtp           | DIVERGENT_PROMOTER     | 0.167                                                        | 0.709                          | 1704.46            | 1209.28            | 0.118                          | 1202.05            | 142.29             |
| A_68_P21350023 | chr2:76245283-76245327                            | NM_145525:710          | Osbpl6        | INSIDE                 | 0.167                                                        | 0.389                          | 2506.16            | 976.01             | 0.065                          | 2061.98            | 133.94             |
| A_68_P26554816 | chr9:59528311-59528358                            | NM_011099:23920        | Pkm2          | DOWNSTREAM             | 0.167                                                        | 0.386                          | 2290.30            | 885.07             | 0.065                          | 1808.73            | 116.99             |
| A_68_P22778523 | chr4:22417085-22417134                            | NM_008899:-1831        | Pou3f2        | PROMOTER               | 0.167                                                        | 0.506                          | 1795.29            | 908.22             | 0.084                          | 1394.05            | 117.56             |
| A_68_P21110357 | chr2:31492430-31492474                            | NM_001123362:-3104     | Prdm12        | PROMOTER               | 0.167                                                        | 0.396                          | 2719.63            | 1075.85            | 0.066                          | 1892.23            | 125.35             |
| A_68_P26463567 | chr9:43552486-43552530                            | NM_021424:-150         | Pvrl1         | PROMOTER               | 0.167                                                        | 0.447                          | 2032.39            | 908.61             | 0.075                          | 1611.49            | 120.60             |
| A_68_P20878433 | chr1:182834482-182834526                          | NM_133705:100          | Pycr2         | INSIDE                 | 0.167                                                        | 0.622                          | 1580.89            | 983.05             | 0.104                          | 1154.60            | 120.26             |
| A_68_P24773074 | chr6:115758230-115758281                          | NR_028546:-134         | Snora7a       | PROMOTER               | 0.167                                                        | 0.586                          | 1450.14            | 849.60             | 0.098                          | 1209.77            | 118.50             |
| A_68_P25959791 | chr8:74658901-74658954                            | NM_001001491:-263      | Tpm4          | PROMOTER               | 0.167                                                        | 1.576                          | 620.44             | 977.71             | 0.263                          | 457.97             | 120.45             |
| A_68_P32540977 | chrX:92391918-92391962                            | ENSMUST00000113884:220 |               | INSIDE                 | 0.167                                                        | 1.672                          | 2390.20            | 3995.39            | 0.280                          | 931.13             | 260.53             |
| A_68_P31341458 | chr17:72953415-72953461                           | NM_007439:209          | Alk           | INSIDE                 | 0.166                                                        | 0.460                          | 2298.82            | 1057.21            | 0.076                          | 1553.46            | 118.26             |
| A_68_P26074973 | chr8:96535729-96535781                            | NM_011787:786          | Amfr          | INSIDE                 | 0.166                                                        | 0.400                          | 3487.11            | 1395.55            | 0.067                          | 2481.13            | 165.01             |
| A_68_P30010833 | chr15:10415572-10415616                           | NM_026396:98           | Brix1         | INSIDE                 | 0.166                                                        | 0.685                          | 1910.79            | 1308.77            | 0.113                          | 1330.06            | 150.94             |
| A_68_P30836892 | chr16:67620668-67620712                           | NM_001145977:463       | Cadm2         | INSIDE                 | 0.166                                                        | 1.518                          | 991.00             | 1504.13            | 0.251                          | 720.76             | 181.25             |
| A_68_P29618485 | chr14:56179012-56179056                           | NM_001199009:-725      | Dcaf11        | PROMOTER               | 0.166                                                        | 0.603                          | 1791.88            | 1081.12            | 0.100                          | 1229.70            | 123.35             |
| A_68_P24218884 | chr6:6831933-6831977                              | NM_010056:114          | Dlx5          | INSIDE                 | 0.166                                                        | 0.630                          | 1786.61            | 1125.89            | 0.105                          | 1214.20            | 127.35             |
| A_68_P24992779 | chr7:19930361-19930405                            | NM_001127324:-37       | Erccl         | PROMOTER               | 0.166                                                        | 0.644                          | 1912.46            | 1231.67            | 0.107                          | 1333.04            | 142.09             |
| A_68_P21575069 | chr2:120229642-120229686                          | NM_172672:33           | Ganc          | INSIDE                 | 0.166                                                        | 0.594                          | 2214.61            | 1315.25            | 0.098                          | 1757.52            | 172.83             |
| A_68_P20941839 | chr1:193961046-193961090                          | NR_033536:289          | Gm10516       | INSIDE                 | 0.166                                                        | 0.538                          | 4764.51            | 2565.43            | 0.090                          | 3621.27            | 324.58             |
| A_68_P24038673 | chr5:120882123-120882167                          | NM_008499:250          | Lhx5          | INSIDE                 | 0.166                                                        | 0.539                          | 1776.36            | 957.52             | 0.089                          | 1337.60            | 119.65             |
| A_68_P20723959 | chr1:154802284-154802330                          | NM_175460:76           | Nmnat2        | INSIDE                 | 0.166                                                        | 0.705                          | 1302.24            | 918.59             | 0.117                          | 1007.86            | 117.88             |
| A_68_P28397152 | chr12:45370530-45370574                           | NM_026164:412          | Pnpla8        | INSIDE                 | 0.166                                                        | 0.655                          | 1701.23            | 1113.60            | 0.109                          | 1094.96            | 119.04             |
| A_68_P25435182 | chr7:121419370-121419414                          | NM_011965:238          | Psmal1        | INSIDE                 | 0.166                                                        | 0.501                          | 1843.87            | 923.12             | 0.083                          | 1452.26            | 120.89             |
| A_68_P24829778 | chr6:126889168-126889219                          | NM_009013:380          | Rad51ap1      | INSIDE                 | 0.166                                                        | 0.500                          | 2037.07            | 1018.09            | 0.083                          | 1424.51            | 118.04             |
| A_68_P25587465 | chr7:148401434-148401478                          | NM_025886:-302         | Rassf7        | DIVERGENT_PROMOTER     | 0.166                                                        | 0.605                          | 1453.65            | 879.77             | 0.100                          | 1148.80            | 115.26             |
| A_68_P21833062 | chr2:166821989-166822037                          | NM_001109905:-234      | Stau1         | PROMOTER               | 0.166                                                        | 0.659                          | 1422.26            | 937.41             | 0.110                          | 1113.63            | 122.03             |
| A_68_P26036157 | chr8:90184552-90184597                            | NM_033327:298920       | Zfp423        | DOWNSTREAM             | 0.166                                                        | 0.616                          | 1439.35            | 886.32             | 0.102                          | 1138.78            | 116.10             |
| A_68_P31148787 | chr17:33495685-33495729                           | NM_207541:117          | Zfp81         | INSIDE                 | 0.166                                                        | 0.496                          | 1792.46            | 889.21             | 0.082                          | 1430.98            | 117.67             |

| ProbeName      | Target position of probe on CpG island microarray | TargetID                | GeneSymbol    | CpG island Description | Ratio of relative methylation (TiO <sub>2</sub> -NP/Vehicle) | Sham group                     |                    |                    | TiO <sub>2</sub> -H group      |                    |                    |
|----------------|---------------------------------------------------|-------------------------|---------------|------------------------|--------------------------------------------------------------|--------------------------------|--------------------|--------------------|--------------------------------|--------------------|--------------------|
|                |                                                   |                         |               |                        |                                                              | Relative methylation (Cy5/Cy3) | Cy3 signal (Input) | Cy5 signal (MeDIP) | Relative methylation (Cy5/Cy3) | Cy3 signal (Input) | Cy5 signal (MeDIP) |
| A_68_P32134054 | chr19:44809087-44809144                           |                         |               | Unknown                | 0.166                                                        | 0.665                          | 2890.85            | 1921.37            | 0.110                          | 2049.66            | 225.64             |
| A_68_P24034672 | chr5:120246641-120246685                          | AK006202:11216          |               | DOWNSTREAM             | 0.166                                                        | 0.522                          | 1786.04            | 931.97             | 0.087                          | 1345.32            | 116.79             |
| A_68_P26018705 | chr8:86721688-86721732                            | AK089363:-3057          |               | PROMOTER               | 0.166                                                        | 0.650                          | 1492.48            | 970.20             | 0.108                          | 1118.05            | 120.90             |
| A_68_P23167115 | chr4:103292261-103292306                          | ENSMUST00000106827:14   |               | INSIDE                 | 0.166                                                        | 1.460                          | 3950.81            | 5767.65            | 0.242                          | 2734.12            | 661.65             |
| A_68_P23259661 | chr4:122563178-122563222                          | NM_007598:-76           | Cap1          | PROMOTER               | 0.165                                                        | 0.622                          | 1470.39            | 914.75             | 0.102                          | 1174.15            | 120.25             |
| A_68_P22319259 | chr3:89221857-89221906                            | NM_016904:332           | Cks1b         | INSIDE                 | 0.165                                                        | 1.891                          | 3058.36            | 5784.20            | 0.312                          | 2099.25            | 654.19             |
| A_68_P25430847 | chr7:120657214-120657258                          | NM_026143:-139          | Far1          | PROMOTER               | 0.165                                                        | 1.424                          | 2227.29            | 3170.93            | 0.235                          | 1609.66            | 377.51             |
| A_68_P28158447 | chr11:116144333-116144377                         | NM_010254:2102          | Galr2         | INSIDE                 | 0.165                                                        | 0.541                          | 1652.92            | 894.54             | 0.089                          | 1276.44            | 113.98             |
| A_68_P21903066 | chr2:180068973-180069017                          | NM_008093:390           | Gata5         | INSIDE                 | 0.165                                                        | 0.604                          | 1416.62            | 855.66             | 0.099                          | 1186.31            | 117.92             |
| A_68_P26035034 | chr8:89997077-89997121                            | NR_033430:388           | Gm2694        | INSIDE                 | 0.165                                                        | 0.630                          | 3175.04            | 2001.39            | 0.104                          | 2212.28            | 229.59             |
| A_68_P27280642 | chr10:79516583-79516627                           | NM_001037741:-177       | Gpx4          | PROMOTER               | 0.165                                                        | 0.306                          | 3440.50            | 1053.80            | 0.051                          | 2600.79            | 131.41             |
| A_68_P27452135 | chr10:111410230-111410274                         | NM_178610:502           | Krr1          | INSIDE                 | 0.165                                                        | 1.345                          | 2836.31            | 3815.35            | 0.222                          | 1978.99            | 439.64             |
| A_68_P24152505 | chr5:143084497-143084543                          | NM_175217:186           | Mmd2          | INSIDE                 | 0.165                                                        | 0.645                          | 1646.80            | 1062.90            | 0.107                          | 1105.43            | 117.73             |
| A_68_P25581952 | chr7:147234431-147234477                          | NM_010836:533           | Msx3          | INSIDE                 | 0.165                                                        | 0.681                          | 2794.24            | 1902.77            | 0.112                          | 1971.31            | 221.10             |
| A_68_P21826986 | chr2:165818945-165818989                          | NM_008679:830           | Neoa3         | INSIDE                 | 0.165                                                        | 1.974                          | 6308.14            | 12453.14           | 0.327                          | 4331.62            | 1414.75            |
| A_68_P32134210 | chr19:44830843-44830902                           | NM_011037:-1011         | Pax2          | PROMOTER               | 0.165                                                        | 0.489                          | 1882.38            | 920.56             | 0.081                          | 1640.59            | 118.05             |
| A_68_P21114132 | chr2:32091883-32091928                            | NM_145145:-297          | Pomt1         | PROMOTER               | 0.165                                                        | 0.584                          | 1824.95            | 1065.34            | 0.096                          | 1301.02            | 125.19             |
| A_68_P28223702 | chr12:8680649-8680696                             | NM_001160221:-267       | Pum2          | PROMOTER               | 0.165                                                        | 0.697                          | 1143.84            | 796.86             | 0.115                          | 1045.99            | 120.19             |
| A_68_P26345409 | chr9:20896597-20896641                            | NR_038081:-166          | Raver1-fdx11  | PROMOTER               | 0.165                                                        | 0.695                          | 1766.46            | 1226.87            | 0.114                          | 1290.26            | 147.57             |
| A_68_P20616246 | chr1:133423879-133423923                          | NM_001081011:38         | Srgap2        | INSIDE                 | 0.165                                                        | 0.750                          | 5910.20            | 4432.85            | 0.123                          | 4115.64            | 507.99             |
| A_68_P23395328 | chr4:147965305-147965349                          | NM_009272:-295          | Srm           | PROMOTER               | 0.165                                                        | 0.681                          | 2347.57            | 1598.71            | 0.112                          | 1660.23            | 186.30             |
| A_68_P25952984 | chr8:73133754-73133798                            | NM_133772:-1563         | Ssbp4         | DIVERGENT_PROMOTER     | 0.165                                                        | 0.728                          | 1875.54            | 1364.47            | 0.120                          | 1483.08            | 178.43             |
| A_68_P21017267 | chr2:13496235-13496279                            | NM_011701:319           | Vim           | INSIDE                 | 0.165                                                        | 0.620                          | 1830.73            | 1134.17            | 0.102                          | 1388.10            | 142.16             |
| A_68_P30019878 | chr15:12047227-12047275                           | NM_011767:-355          | Zfr           | PROMOTER               | 0.165                                                        | 1.476                          | 2159.40            | 3187.97            | 0.243                          | 1475.39            | 359.07             |
| A_68_P31465574 | chr18:4921738-4921782                             | ENSMUST00000143254:37   |               | INSIDE                 | 0.165                                                        | 0.594                          | 2751.14            | 1634.80            | 0.098                          | 2137.33            | 209.64             |
| A_68_P31467178 | chr18:5163541-5163591                             | ENSMUST00000150337:2163 |               | INSIDE                 | 0.165                                                        | 0.569                          | 2075.83            | 1180.43            | 0.094                          | 1567.70            | 147.19             |
| A_68_P30284259 | chr15:64753330-64753385                           | NM_009623:501           | Adecy8        | INSIDE                 | 0.164                                                        | 0.614                          | 1507.56            | 925.75             | 0.101                          | 1182.61            | 119.05             |
| A_68_P28041223 | chr11:95720113-95720157                           | NM_008081:56051         | B4galnt2      | DOWNSTREAM             | 0.164                                                        | 0.706                          | 3433.64            | 2424.23            | 0.116                          | 2318.82            | 268.57             |
| A_68_P32050469 | chr19:29065228-29065272                           | NM_025950:267           | Cdc3711       | INSIDE                 | 0.164                                                        | 0.678                          | 2356.73            | 1598.79            | 0.111                          | 1781.24            | 197.88             |
| A_68_P22318235 | chr3:89070608-89070657                            | NM_026767:159           | Dpm3          | INSIDE                 | 0.164                                                        | 0.715                          | 1680.15            | 1200.62            | 0.117                          | 1150.04            | 134.93             |
| A_68_P24607723 | chr6:85978919-85978963                            | NM_012013:11756         | Figla         | DOWNSTREAM             | 0.164                                                        | 0.503                          | 1886.70            | 948.48             | 0.082                          | 1424.37            | 117.35             |
| A_68_P23331442 | chr4:135519710-135519754                          | NM_178389:-1347         | Gale          | PROMOTER               | 0.164                                                        | 0.634                          | 4490.02            | 2844.55            | 0.104                          | 2903.65            | 301.49             |
| A_68_P20864287 | chr1:180457911-180457955                          | NM_001161665:-1323      | Kif26b        | PROMOTER               | 0.164                                                        | 0.495                          | 2357.97            | 1166.98            | 0.081                          | 1885.46            | 153.30             |
| A_68_P25101649 | chr7:54101500-54101544                            | NM_001136069:-929       | Ldha          | PROMOTER               | 0.164                                                        | 0.529                          | 1557.57            | 823.47             | 0.087                          | 1395.24            | 120.98             |
| A_68_P27998472 | chr11:88017697-88017741                           | NM_024174:-201          | Mrps23        | PROMOTER               | 0.164                                                        | 0.710                          | 2072.68            | 1470.72            | 0.116                          | 1545.59            | 179.32             |
| A_68_P28875775 | chr13:22098833-22098877                           | NM_019429:2756          | Prss16        | INSIDE                 | 0.164                                                        | 0.624                          | 1531.19            | 955.62             | 0.102                          | 1187.08            | 121.26             |
| A_68_P30979595 | chr16:94346850-94346894                           | NM_011377:261368        | Sim2          | INSIDE                 | 0.164                                                        | 0.696                          | 2233.47            | 1553.92            | 0.114                          | 1799.55            | 205.68             |
| A_68_P20354640 | chr1:75518210-75518265                            | NM_027886:134           | Stk11ip       | INSIDE                 | 0.164                                                        | 0.460                          | 2161.70            | 993.42             | 0.076                          | 1600.44            | 120.99             |
| A_68_P29141047 | chr13:73764398-73764442                           | NM_009354:-28           | Tert          | PROMOTER               | 0.164                                                        | 1.730                          | 2630.18            | 4549.43            | 0.284                          | 1706.64            | 484.87             |
| A_68_P31161200 | chr17:35975270-35975315                           | NM_011655:-46           | Tubb5         | DIVERGENT_PROMOTER     | 0.164                                                        | 0.643                          | 1931.59            | 1241.20            | 0.105                          | 1407.87            | 147.99             |
| A_68_P25670550 | chr8:13785336-13785380                            | NM_025924:-256          | Upf3a         | PROMOTER               | 0.164                                                        | 0.418                          | 2270.42            | 949.67             | 0.069                          | 1798.70            | 123.76             |
| A_68_P30471848 | chr15:97738946-97738998                           | NM_009504:-245          | Vdr           | PROMOTER               | 0.164                                                        | 0.620                          | 1669.97            | 1035.46            | 0.102                          | 1209.23            | 123.13             |
| A_68_P29672988 | chr14:65977163-65977207                           | NM_199029:-328          | Zfp395        | PROMOTER               | 0.164                                                        | 0.706                          | 1716.30            | 1210.95            | 0.116                          | 1424.76            | 164.68             |
| A_68_P31620729 | chr18:36049726-36049770                           |                         |               | Unknown                | 0.164                                                        | 0.493                          | 2169.01            | 1068.59            | 0.081                          | 1509.50            | 121.87             |
| A_68_P21567192 | chr2:118798592-118798636                          | AK184532:45454          |               | INSIDE                 | 0.164                                                        | 0.644                          | 1479.09            | 952.29             | 0.106                          | 1159.91            | 122.42             |
| A_68_P31992375 | chr19:18745959-18746006                           | NM_026120:713           | 2410127L17Rik | INSIDE                 | 0.163                                                        | 0.490                          | 1897.14            | 929.53             | 0.080                          | 1429.31            | 113.89             |
| A_68_P26569958 | chr9:62189997-62190041                            | NM_009672:869           | Anp32a        | INSIDE                 | 0.163                                                        | 0.550                          | 2442.60            | 1342.26            | 0.090                          | 1711.46            | 153.46             |
| A_68_P26035016 | chr8:89994962-89995006                            | NM_019626:1507          | Cbln1         | INSIDE                 | 0.163                                                        | 0.547                          | 1863.52            | 1019.39            | 0.089                          | 1317.44            | 117.26             |
| A_68_P30349757 | chr15:76490222-76490266                           | NM_019396:247           | Cyhr1         | INSIDE                 | 0.163                                                        | 0.651                          | 2882.75            | 1876.43            | 0.106                          | 1975.22            | 208.99             |
| A_68_P29699033 | chr14:70479382-70479426                           | NM_018781:2153          | Egr3          | INSIDE                 | 0.163                                                        | 0.460                          | 2042.28            | 938.77             | 0.075                          | 1575.72            | 118.15             |
| A_68_P28602893 | chr12:86560681-86560733                           | NM_145445:244           | Eif2b2        | INSIDE                 | 0.163                                                        | 0.438                          | 2476.38            | 1084.81            | 0.071                          | 1621.67            | 115.92             |

| ProbeName      | Target position of probe on CpG island microarray | TargetID               | GeneSymbol | CpG island Description | Ratio of relative methylation (TiO <sub>2</sub> -NP/Vehicle) | Sham group                     |                    |                    | TiO <sub>2</sub> -H group      |                    |                    |
|----------------|---------------------------------------------------|------------------------|------------|------------------------|--------------------------------------------------------------|--------------------------------|--------------------|--------------------|--------------------------------|--------------------|--------------------|
|                |                                                   |                        |            |                        |                                                              | Relative methylation (Cy5/Cy3) | Cy3 signal (Input) | Cy5 signal (MeDIP) | Relative methylation (Cy5/Cy3) | Cy3 signal (Input) | Cy5 signal (MeDIP) |
| A_68_P27937914 | chr11:77306484-77306528                           | NM_001004144-407       | Git1       | DIVERGENT_PROMOTER     | 0.163                                                        | 0.318                          | 3524.28            | 1120.61            | 0.052                          | 2433.98            | 126.21             |
| A_68_P23352769 | chr4:139130258-139130302                          | NM_001205173-354       | Iffo2      | PROMOTER               | 0.163                                                        | 0.602                          | 1547.58            | 931.48             | 0.098                          | 1193.31            | 117.01             |
| A_68_P24817384 | chr6:124806960-124807011                          | NM_013534-720          | Leprel2    | INSIDE                 | 0.163                                                        | 0.560                          | 1692.23            | 947.48             | 0.091                          | 1288.16            | 117.63             |
| A_68_P23185679 | chr4:106323706-106323750                          | NM_001083887-55        | Pars2      | INSIDE                 | 0.163                                                        | 0.566                          | 2228.52            | 1261.77            | 0.092                          | 1438.05            | 132.66             |
| A_68_P29047306 | chr13:54167631-54167675                           | NM_027324-439          | Sfxn1      | INSIDE                 | 0.163                                                        | 0.584                          | 1716.87            | 1002.57            | 0.095                          | 1252.42            | 119.43             |
| A_68_P21395956 | chr2:84877845-84877892                            | NM_001136081-261       | Ssrp1      | INSIDE                 | 0.163                                                        | 1.640                          | 519.38             | 851.92             | 0.268                          | 445.15             | 119.23             |
| A_68_P23189068 | chr4:106851270-106851320                          | NM_029565-60           | Tmem59     | INSIDE                 | 0.163                                                        | 0.533                          | 2035.46            | 1084.33            | 0.087                          | 1406.85            | 122.20             |
| A_68_P31644532 | chr18:40378757-40378801                           | NM_023311-275          | Yipf5      | INSIDE                 | 0.163                                                        | 1.778                          | 6506.46            | 11569.67           | 0.289                          | 4385.35            | 1267.87            |
| A_68_P31323669 | chr17:69733337-69733381                           | NM_009547-41           | Zfp161     | INSIDE                 | 0.163                                                        | 0.592                          | 1683.35            | 996.60             | 0.096                          | 1209.57            | 116.53             |
| A_68_P32115178 | chr19:41558052-41558105                           | ENSMUST00000067795-952 |            | INSIDE                 | 0.163                                                        | 1.742                          | 1442.57            | 2513.25            | 0.285                          | 942.70             | 268.33             |
| A_68_P26505579 | chr9:50583333-50583384                            | NM_133981-76           | Alg9       | PROMOTER               | 0.162                                                        | 0.588                          | 1731.65            | 1018.31            | 0.095                          | 1203.41            | 114.79             |
| A_68_P25833744 | chr8:47085514-47085558                            | NM_001039562-332       | Ankrd37    | PROMOTER               | 0.162                                                        | 0.659                          | 6235.37            | 4107.47            | 0.107                          | 4090.02            | 436.65             |
| A_68_P21075527 | chr2:25838017-25838061                            | NM_001115076-764       | Camsap1    | INSIDE                 | 0.162                                                        | 0.734                          | 3121.54            | 2289.68            | 0.119                          | 2110.39            | 250.73             |
| A_68_P30589277 | chr16:20733808-20733856                           | NM_009893-633          | Chrd       | INSIDE                 | 0.162                                                        | 0.569                          | 1908.64            | 1086.20            | 0.092                          | 1314.14            | 121.00             |
| A_68_P29033460 | chr13:51741130-51741185                           | NM_025415-557          | Cks2       | INSIDE                 | 0.162                                                        | 0.568                          | 1872.70            | 1063.29            | 0.092                          | 1323.90            | 121.98             |
| A_68_P20794596 | chr1:167389914-167389958                          | NM_028759-658          | Dcaf6      | INSIDE                 | 0.162                                                        | 0.535                          | 1923.31            | 1029.17            | 0.087                          | 1345.78            | 116.58             |
| A_68_P32135378 | chr19:45005914-45005958                           | NM_001081225-328       | Fam178a    | INSIDE                 | 0.162                                                        | 1.620                          | 2180.75            | 3532.95            | 0.262                          | 1585.12            | 415.47             |
| A_68_P31357838 | chr17:75951190-75951234                           | NM_133747-74           | Fam98a     | INSIDE                 | 0.162                                                        | 0.671                          | 1504.50            | 1009.87            | 0.109                          | 1106.13            | 120.44             |
| A_68_P29448411 | chr14:21514995-21515039                           | NM_028428-827          | Fut11      | INSIDE                 | 0.162                                                        | 0.621                          | 2215.40            | 1375.21            | 0.100                          | 1696.01            | 170.16             |
| A_68_P23438376 | chr4:154771887-154771931                          | NM_008072-270          | Gabrd      | INSIDE                 | 0.162                                                        | 0.539                          | 1732.08            | 933.40             | 0.087                          | 1431.60            | 124.88             |
| A_68_P30849202 | chr16:70314865-70314917                           | NM_028803-559          | Gbe1       | INSIDE                 | 0.162                                                        | 0.642                          | 1707.73            | 1097.06            | 0.104                          | 1161.22            | 120.54             |
| A_68_P31373925 | chr17:79234724-79234768                           | NM_001081179-25        | Heat5b     | DIVERGENT_PROMOTER     | 0.162                                                        | 0.613                          | 1688.00            | 1035.56            | 0.100                          | 1290.76            | 128.53             |
| A_68_P31150129 | chr17:33822024-33822068                           | NM_001109913-357       | Hnrmpm     | INSIDE                 | 0.162                                                        | 0.528                          | 1867.53            | 986.84             | 0.086                          | 1526.06            | 130.80             |
| A_68_P26026699 | chr8:88364441-88364485                            | NM_028007-386          | Irfg1      | INSIDE                 | 0.162                                                        | 0.527                          | 1729.81            | 911.22             | 0.085                          | 1423.62            | 121.35             |
| A_68_P30290897 | chr15:66117445-66117492                           | NM_152923-318          | Kenq3      | INSIDE                 | 0.162                                                        | 0.628                          | 1729.08            | 1085.51            | 0.102                          | 1184.62            | 120.64             |
| A_68_P26805730 | chr9:106793972-106794020                          | NM_029103-273          | Manf       | INSIDE                 | 0.162                                                        | 0.726                          | 1691.90            | 1229.03            | 0.117                          | 1236.20            | 145.19             |
| A_68_P26463578 | chr9:43553721-43553771                            | NM_021424-1088         | Pvrl1      | INSIDE                 | 0.162                                                        | 0.686                          | 1618.63            | 1111.18            | 0.111                          | 1081.26            | 120.43             |
| A_68_P22315263 | chr3:88520957-88521001                            | NM_001163310-203       | Rit1       | INSIDE                 | 0.162                                                        | 0.399                          | 4190.98            | 1670.30            | 0.065                          | 3125.81            | 202.04             |
| A_68_P23201330 | chr4:109148797-109148841                          | NM_013876-292          | Rnf11      | INSIDE                 | 0.162                                                        | 0.553                          | 1864.00            | 1030.94            | 0.090                          | 1367.47            | 122.82             |
| A_68_P26442128 | chr9:40076808-40076852                            | NM_001083917-30        | Scn3b      | INSIDE                 | 0.162                                                        | 0.495                          | 2012.11            | 996.61             | 0.080                          | 1520.69            | 121.77             |
| A_68_P24992393 | chr7:19856667-19856716                            | NM_009499-512          | Vasp       | INSIDE                 | 0.162                                                        | 1.495                          | 1320.58            | 1974.31            | 0.242                          | 944.98             | 228.85             |
| A_68_P30641651 | chr16:30388272-30388316                           | NM_001128094-322       | Atp13a3    | INSIDE                 | 0.161                                                        | 0.634                          | 1567.10            | 994.05             | 0.102                          | 1204.28            | 122.65             |
| A_68_P22322690 | chr3:89767430-89767474                            | NM_001081182-22        | Atp8b2     | PROMOTER               | 0.161                                                        | 0.673                          | 2283.87            | 1538.14            | 0.109                          | 1457.85            | 158.39             |
| A_68_P20827008 | chr1:173200751-173200795                          | NM_020579-314          | B4galt3    | INSIDE                 | 0.161                                                        | 0.461                          | 2298.72            | 1059.57            | 0.074                          | 1584.77            | 117.29             |
| A_68_P31157817 | chr17:35272686-35272730                           | NM_057171-522          | Bag6       | INSIDE                 | 0.161                                                        | 0.451                          | 2178.45            | 982.58             | 0.073                          | 1588.13            | 115.64             |
| A_68_P30381572 | chr15:81958155-81958201                           | NM_172428-173          | Ccdc134    | PROMOTER               | 0.161                                                        | 0.544                          | 2619.49            | 1425.71            | 0.088                          | 1801.50            | 157.69             |
| A_68_P23195896 | chr4:108079185-108079229                          | NM_024198-112          | Gpx7       | INSIDE                 | 0.161                                                        | 0.629                          | 1653.33            | 1039.44            | 0.101                          | 1128.72            | 113.93             |
| A_68_P28834522 | chr13:13682471-13682515                           | NM_010748-183          | Lyst       | PROMOTER               | 0.161                                                        | 0.482                          | 2052.21            | 988.96             | 0.078                          | 1560.66            | 121.27             |
| A_68_P31055437 | chr17:13109036-13109080                           | NM_026310-101          | Mrp118     | DIVERGENT_PROMOTER     | 0.161                                                        | 0.518                          | 1969.15            | 1019.98            | 0.083                          | 1380.44            | 115.13             |
| A_68_P20188964 | chr1:43503293-43503346                            | NM_010879-724          | Nck2       | INSIDE                 | 0.161                                                        | 0.474                          | 2440.58            | 1157.83            | 0.077                          | 1623.29            | 124.31             |
| A_68_P30397300 | chr15:84685696-84685740                           | NM_001081166-841       | Phf21b     | INSIDE                 | 0.161                                                        | 1.372                          | 1438.57            | 1974.32            | 0.221                          | 931.51             | 205.95             |
| A_68_P25728675 | chr8:26830785-26830829                            | NM_028000-287          | Ppapdc1b   | INSIDE                 | 0.161                                                        | 0.576                          | 1848.70            | 1064.49            | 0.093                          | 1341.83            | 124.14             |
| A_68_P32374349 | chrX:48372156-48372200                            | NM_172413-983          | Rap2c      | PROMOTER               | 0.161                                                        | 1.550                          | 916.33             | 1420.77            | 0.249                          | 484.48             | 120.83             |
| A_68_P27165510 | chr10:58276430-58276477                           | NM_172788-347          | Sh3rf3     | INSIDE                 | 0.161                                                        | 0.566                          | 2763.45            | 1563.59            | 0.091                          | 1999.48            | 182.00             |
| A_68_P23543621 | chr5:24236647-24236691                            | NM_001081441-170       | Wdr86      | PROMOTER               | 0.161                                                        | 0.650                          | 1490.59            | 968.61             | 0.105                          | 1131.20            | 118.30             |
| A_68_P25082978 | chr7:50817824-50817869                            | NM_001008549-107       | Zfp658     | INSIDE                 | 0.161                                                        | 0.595                          | 1693.69            | 1008.10            | 0.096                          | 1244.50            | 119.40             |
| A_68_P30337603 | chr15:74348034-74348078                           | NM_174991-1431         | Bai1       | INSIDE                 | 0.160                                                        | 0.511                          | 2107.94            | 1077.42            | 0.082                          | 1478.80            | 120.66             |
| A_68_P21905703 | chr2:180445288-180445335                          | NM_177852-607          | Dido1      | DIVERGENT_PROMOTER     | 0.160                                                        | 0.625                          | 1566.59            | 979.57             | 0.100                          | 1159.82            | 116.26             |
| A_68_P28036771 | chr11:94981735-94981779                           | NM_010055-326          | Dlx3       | INSIDE                 | 0.160                                                        | 0.694                          | 1430.45            | 992.60             | 0.111                          | 1064.15            | 118.07             |
| A_68_P22318336 | chr3:89084785-89084834                            | NM_010107-1242         | Efnal      | PROMOTER               | 0.160                                                        | 0.626                          | 1735.52            | 1086.78            | 0.100                          | 1236.35            | 123.95             |
| A_68_P21573668 | chr2:119980528-119980572                          | NM_133838-239          | Ehd4       | PROMOTER               | 0.160                                                        | 0.456                          | 2041.22            | 930.87             | 0.073                          | 1609.40            | 117.49             |

| ProbeName      | Target position of probe on CpG island microarray | TargetID                | GeneSymbol    | CpG island Description | Ratio of relative methylation (TiO <sub>2</sub> -NP/Vehicle) | Sham group                     |                    |                    | TiO <sub>2</sub> -H group      |                    |                    |
|----------------|---------------------------------------------------|-------------------------|---------------|------------------------|--------------------------------------------------------------|--------------------------------|--------------------|--------------------|--------------------------------|--------------------|--------------------|
|                |                                                   |                         |               |                        |                                                              | Relative methylation (Cy5/Cy3) | Cy3 signal (Input) | Cy5 signal (MeDIP) | Relative methylation (Cy5/Cy3) | Cy3 signal (Input) | Cy5 signal (MeDIP) |
| A_68_P28865537 | chr13:20182539-20182583                           | NM_080288:185           | Elmo1         | INSIDE                 | 0.160                                                        | 0.428                          | 3567.37            | 1526.30            | 0.068                          | 2815.55            | 192.78             |
| A_68_P26132614 | chr8:107793016-107793064                          | NM_015821:4493          | Fbxl8         | INSIDE                 | 0.160                                                        | 0.555                          | 2094.84            | 1162.85            | 0.089                          | 1370.76            | 121.96             |
| A_68_P21071264 | chr2:25160798-25160842                            | NM_001177656:13863      | Grin1         | INSIDE                 | 0.160                                                        | 0.513                          | 3294.87            | 1691.13            | 0.082                          | 2379.11            | 195.48             |
| A_68_P29668829 | chr14:65271192-65271238                           | NM_001081177:-153       | Kif13b        | PROMOTER               | 0.160                                                        | 0.493                          | 1794.03            | 885.17             | 0.079                          | 1495.33            | 118.26             |
| A_68_P23439844 | chr4:155027433-155027477                          | NM_011985:39            | Mmp23         | INSIDE                 | 0.160                                                        | 0.664                          | 1677.61            | 1114.23            | 0.106                          | 1142.94            | 121.64             |
| A_68_P23894274 | chr5:92863985-92864029                            | NM_183392:219           | Nup54         | INSIDE                 | 0.160                                                        | 0.580                          | 1668.34            | 968.02             | 0.093                          | 1240.45            | 115.41             |
| A_68_P30558433 | chr16:13668026-13668070                           | NM_028761:215           | Parn          | INSIDE                 | 0.160                                                        | 0.541                          | 1759.66            | 952.82             | 0.087                          | 1443.54            | 124.88             |
| A_68_P20642550 | chr1:137815675-137815719                          | NM_019645:-95           | Pkp1          | PROMOTER               | 0.160                                                        | 0.550                          | 3846.71            | 2116.20            | 0.088                          | 2820.11            | 247.88             |
| A_68_P21490975 | chr2:104656460-104656504                          | NM_001123327:371        | Qser1         | INSIDE                 | 0.160                                                        | 0.714                          | 1495.29            | 1068.21            | 0.114                          | 1076.84            | 122.90             |
| A_68_P31024850 | chr17:7374080-7374124                             | NM_011299:-361          | Rps6ka2       | PROMOTER               | 0.160                                                        | 0.483                          | 2850.15            | 1375.90            | 0.077                          | 2241.33            | 173.47             |
| A_68_P22215796 | chr3:68298884-68298928                            | NR_036665:792           | Schip1        | INSIDE                 | 0.160                                                        | 0.506                          | 5750.71            | 2909.70            | 0.081                          | 4159.49            | 336.40             |
| A_68_P21133064 | chr2:35192370-35192414                            | NM_013515:137           | Stom          | INSIDE                 | 0.160                                                        | 0.652                          | 1567.37            | 1021.47            | 0.104                          | 1175.73            | 122.53             |
| A_68_P29455893 | chr14:22807230-22807274                           | NM_145459:1571          | Zfp503        | INSIDE                 | 0.160                                                        | 0.467                          | 2433.51            | 1135.41            | 0.075                          | 1945.26            | 145.44             |
| A_68_P22360097 | chr3:98232384-98232428                            | NM_172863:46003         | Zfp697        | INSIDE                 | 0.160                                                        | 0.498                          | 1747.31            | 870.94             | 0.080                          | 1458.40            | 116.57             |
| A_68_P23195050 | chr4:107890175-107890219                          | NM_001167936:331        | Zyg11a        | INSIDE                 | 0.160                                                        | 0.678                          | 2288.46            | 1552.64            | 0.109                          | 2011.46            | 218.44             |
| A_68_P23589615 | chr5:33883046-33883098                            |                         |               | Unknown                | 0.160                                                        | 1.472                          | 2731.97            | 4022.19            | 0.236                          | 1954.10            | 461.01             |
| A_68_P31013267 | chr17:4908022-4908066                             | AK186662:127801         |               | INSIDE                 | 0.160                                                        | 0.512                          | 1840.97            | 943.47             | 0.082                          | 1439.02            | 117.66             |
| A_68_P26467844 | chr9:44291603-44291647                            | ENSMUST00000136322:4764 |               | DOWNSTREAM             | 0.160                                                        | 0.735                          | 2618.75            | 1924.97            | 0.118                          | 1740.72            | 204.83             |
| A_68_P28050588 | chr11:97302102-97302146                           | NM_021493:-9349         | Arhgap23      | PROMOTER               | 0.159                                                        | 0.685                          | 1509.05            | 1033.98            | 0.109                          | 1098.69            | 119.55             |
| A_68_P22859653 | chr4:40895771-40895815                            | NM_029814:207           | Chmp5         | INSIDE                 | 0.159                                                        | 0.656                          | 2943.86            | 1930.79            | 0.104                          | 2197.19            | 228.71             |
| A_68_P30588476 | chr16:20611624-20611668                           | NM_025462:-27           | Eec2          | DIVERGENT_PROMOTER     | 0.159                                                        | 0.612                          | 1636.15            | 1001.51            | 0.098                          | 1193.98            | 116.53             |
| A_68_P24533906 | chr6:70906262-70906307                            | NM_001101464:-315       | Foxi3         | PROMOTER               | 0.159                                                        | 0.633                          | 3695.05            | 2340.27            | 0.101                          | 2582.63            | 260.88             |
| A_68_P31213681 | chr17:47831661-47831705                           | NM_144939:-473          | Frs3          | DIVERGENT_PROMOTER     | 0.159                                                        | 0.476                          | 6187.53            | 2944.19            | 0.076                          | 3978.62            | 301.12             |
| A_68_P31260063 | chr17:57245094-57245138                           | NR_033508:249           | Gm11110       | INSIDE                 | 0.159                                                        | 0.691                          | 1609.13            | 1112.43            | 0.110                          | 1085.37            | 119.30             |
| A_68_P22187974 | chr3:62407714-62407758                            | NM_177346:1326          | Gpr149        | INSIDE                 | 0.159                                                        | 0.555                          | 1639.45            | 910.62             | 0.088                          | 1377.95            | 121.42             |
| A_68_P32090697 | chr19:36628656-36628700                           | NM_001163471:-450       | Hectd2        | PROMOTER               | 0.159                                                        | 0.673                          | 1365.57            | 918.67             | 0.107                          | 1113.34            | 118.88             |
| A_68_P26655646 | chr9:77502889-77502936                            | NM_172925:18374         | Kihl31        | INSIDE                 | 0.159                                                        | 0.706                          | 1266.67            | 893.82             | 0.112                          | 1058.36            | 118.95             |
| A_68_P32451587 | chrX:68303129-68303173                            | NM_001081354:-280       | Maml1         | PROMOTER               | 0.159                                                        | 2.534                          | 1396.22            | 3538.14            | 0.403                          | 613.24             | 247.39             |
| A_68_P22028767 | chr3:30407126-30407173                            | NM_021442:1260          | Mecom         | INSIDE                 | 0.159                                                        | 0.715                          | 1488.17            | 1063.97            | 0.113                          | 1059.84            | 120.29             |
| A_68_P25089970 | chr7:52147618-52147662                            | NM_029365:96            | Med25         | INSIDE                 | 0.159                                                        | 0.434                          | 2815.10            | 1223.08            | 0.069                          | 2156.39            | 148.87             |
| A_68_P25088092 | chr7:51803991-51804035                            | NM_011131:173           | Pold1         | INSIDE                 | 0.159                                                        | 0.697                          | 2838.95            | 1977.55            | 0.111                          | 1874.27            | 207.66             |
| A_68_P31929909 | chr19:5654397-5654451                             | NM_001164480:9283       | Sipa1         | INSIDE                 | 0.159                                                        | 0.540                          | 1876.73            | 1013.72            | 0.086                          | 1353.16            | 116.39             |
| A_68_P28744648 | chr12:112776290-112776334                         | NR_033168:-2844         | Snora28       | PROMOTER               | 0.159                                                        | 0.535                          | 4270.42            | 2286.59            | 0.085                          | 3019.34            | 257.39             |
| A_68_P26706408 | chr9:87625899-87625944                            | NM_023814:174           | Tbx18         | INSIDE                 | 0.159                                                        | 0.689                          | 1381.98            | 952.27             | 0.110                          | 1081.58            | 118.54             |
| A_68_P25500989 | chr7:133679675-133679719                          |                         |               | Unknown                | 0.159                                                        | 0.686                          | 1521.47            | 1043.45            | 0.109                          | 1080.71            | 117.57             |
| A_68_P26568892 | chr9:61969537-61969589                            | mmu-mir-5133:839        |               | DOWNSTREAM             | 0.159                                                        | 0.659                          | 1356.94            | 894.68             | 0.105                          | 1145.17            | 120.43             |
| A_68_P24358386 | chr6:34827862-34827906                            | NM_001135611:181        | 3110062M04Rik | INSIDE                 | 0.158                                                        | 0.465                          | 2119.36            | 984.89             | 0.073                          | 1593.11            | 116.88             |
| A_68_P31351858 | chr17:74928310-74928354                           | NM_007566:698           | Birc6         | INSIDE                 | 0.158                                                        | 0.503                          | 2795.33            | 1404.81            | 0.080                          | 2107.81            | 167.89             |
| A_68_P21114932 | chr2:32218910-32218958                            | NM_028412:181           | Ciz1          | INSIDE                 | 0.158                                                        | 2.241                          | 636.64             | 1426.73            | 0.354                          | 398.04             | 141.03             |
| A_68_P31150909 | chr17:34045790-34045846                           | NM_007829:-571          | Daxx          | PROMOTER               | 0.158                                                        | 0.468                          | 2184.09            | 1023.15            | 0.074                          | 1585.86            | 117.42             |
| A_68_P29654698 | chr14:62911858-62911904                           | NM_173419:-64           | Dleu7         | PROMOTER               | 0.158                                                        | 0.599                          | 1463.37            | 877.18             | 0.095                          | 1288.13            | 122.38             |
| A_68_P23155401 | chr4:101181535-101181581                          | NM_001164584:978        | Dnajc6        | INSIDE                 | 0.158                                                        | 0.467                          | 2248.25            | 1049.28            | 0.074                          | 1648.03            | 121.68             |
| A_68_P29713895 | chr14:73110156-73110200                           | NM_0207636:-368         | Fndc3a        | PROMOTER               | 0.158                                                        | 0.678                          | 1409.74            | 956.30             | 0.107                          | 1165.62            | 125.23             |
| A_68_P28604402 | chr12:86827971-86828024                           | NM_010234:13147         | Fos           | DOWNSTREAM             | 0.158                                                        | 0.618                          | 3691.79            | 2280.92            | 0.097                          | 2586.93            | 252.13             |
| A_68_P23571065 | chr5:30481976-30482020                            | NM_145558:137           | Hadhb         | INSIDE                 | 0.158                                                        | 0.608                          | 1512.98            | 919.33             | 0.096                          | 1222.17            | 117.62             |
| A_68_P24448822 | chr6:52127106-52127159                            | NM_010452:35934         | Hoxa3         | INSIDE                 | 0.158                                                        | 0.636                          | 1596.56            | 1015.95            | 0.100                          | 1238.86            | 124.26             |
| A_68_P20778371 | chr1:164478469-164478518                          | NM_144877:-17           | Mettl13       | PROMOTER               | 0.158                                                        | 0.603                          | 1649.91            | 995.20             | 0.095                          | 1268.58            | 120.94             |
| A_68_P29689306 | chr14:68743165-68743210                           | NM_008691:-126          | Nefm          | PROMOTER               | 0.158                                                        | 0.541                          | 1964.20            | 1062.64            | 0.086                          | 1348.78            | 115.38             |
| A_68_P23057173 | chr4:82150827-82150874                            | NM_001113209:362        | Nfib          | INSIDE                 | 0.158                                                        | 0.512                          | 1950.75            | 997.92             | 0.081                          | 1438.31            | 115.99             |
| A_68_P21096074 | chr2:29107607-29107664                            | NM_133500:-4075         | Ntng2         | PROMOTER               | 0.158                                                        | 1.553                          | 2861.42            | 4444.43            | 0.245                          | 1933.41            | 473.66             |
| A_68_P26476664 | chr9:45714791-45714835                            | NM_178709:148           | Rnf214        | INSIDE                 | 0.158                                                        | 0.448                          | 2329.57            | 1044.43            | 0.071                          | 1776.66            | 125.70             |

| ProbeName      | Target position of probe on CpG island microarray | TargetID               | GeneSymbol    | CpG island Description | Ratio of relative methylation (TiO <sub>2</sub> -NP/Vehicle) | Sham group                     |                    |                    | TiO <sub>2</sub> -H group      |                    |                    |
|----------------|---------------------------------------------------|------------------------|---------------|------------------------|--------------------------------------------------------------|--------------------------------|--------------------|--------------------|--------------------------------|--------------------|--------------------|
|                |                                                   |                        |               |                        |                                                              | Relative methylation (Cy5/Cy3) | Cy3 signal (Input) | Cy5 signal (MeDIP) | Relative methylation (Cy5/Cy3) | Cy3 signal (Input) | Cy5 signal (MeDIP) |
| A_68_P21631237 | chr2:130522606-130522650                          | NM_001081162:627       | Slc4a11       | INSIDE                 | 0.158                                                        | 0.616                          | 2096.96            | 1291.76            | 0.098                          | 1671.59            | 163.02             |
| A_68_P31207578 | chr17:46692314-46692358                           | NM_020493:775          | Srf           | INSIDE                 | 0.158                                                        | 0.667                          | 1514.02            | 1009.94            | 0.106                          | 1123.57            | 118.57             |
| A_68_P28158411 | chr11:116135230-116135274                         | NM_146032:279          | Srp68         | INSIDE                 | 0.158                                                        | 1.446                          | 2201.26            | 3183.70            | 0.229                          | 1480.33            | 338.74             |
| A_68_P27234342 | chr10:70700324-70700368                           | NM_009360:446          | Tfam          | INSIDE                 | 0.158                                                        | 0.561                          | 3070.69            | 1723.97            | 0.089                          | 2439.78            | 216.40             |
| A_68_P21433077 | chr2:93028116-93028160                            | NM_001025246:398       | Trp53i11      | INSIDE                 | 0.158                                                        | 0.454                          | 2258.93            | 1026.01            | 0.072                          | 1723.33            | 123.44             |
| A_68_P24817207 | chr6:124779297-124779341                          | NM_013700:147          | Usp5          | INSIDE                 | 0.158                                                        | 0.485                          | 2622.24            | 1273.09            | 0.077                          | 1796.26            | 137.57             |
| A_68_P21179663 | chr2:44782139-44782193                            | ENSMUST00000133442:503 |               | INSIDE                 | 0.158                                                        | 0.452                          | 2371.65            | 1071.06            | 0.071                          | 1673.69            | 119.52             |
| A_68_P30403120 | chr15:85641984-85642028                           | NM_001164625:121       | 2210021J22Rik | INSIDE                 | 0.157                                                        | 0.639                          | 2838.89            | 1814.25            | 0.101                          | 2116.42            | 212.73             |
| A_68_P24135765 | chr5:139936243-139936287                          | NM_028469:224          | 3110082117Rik | INSIDE                 | 0.157                                                        | 1.365                          | 4117.54            | 5621.09            | 0.214                          | 2785.72            | 596.43             |
| A_68_P20161228 | chr1:38683615-38683660                            | NM_010678:38163        | Aff3          | INSIDE                 | 0.157                                                        | 0.686                          | 3374.56            | 2315.49            | 0.108                          | 2187.27            | 235.93             |
| A_68_P32673102 | chrX:131220969-131221013                          | NM_001202500:-6872     | Armcx4        | PROMOTER               | 0.157                                                        | 1.696                          | 2755.68            | 4674.73            | 0.267                          | 1102.55            | 294.43             |
| A_68_P32364052 | chrX:45697351-45697395                            | NM_178782:2838         | Bcor1l        | INSIDE                 | 0.157                                                        | 2.064                          | 901.87             | 1861.49            | 0.324                          | 365.05             | 118.27             |
| A_68_P20413587 | chr1:88600174-88600218                            | NM_001172157:-182      | Dis3l2        | PROMOTER               | 0.157                                                        | 0.542                          | 1819.73            | 986.39             | 0.085                          | 1376.97            | 117.52             |
| A_68_P26630496 | chr9:72806623-72806667                            | NM_001163725:53        | Dyx1c1        | INSIDE                 | 0.157                                                        | 0.536                          | 2529.38            | 1354.55            | 0.084                          | 1858.00            | 156.40             |
| A_68_P31615128 | chr18:35020826-35020870                           | NM_007913:-12          | Egr1          | PROMOTER               | 0.157                                                        | 0.471                          | 2150.96            | 1012.61            | 0.074                          | 1559.68            | 115.61             |
| A_68_P21122320 | chr2:33436378-33436430                            | NM_010725:59627        | Lmx1b         | INSIDE                 | 0.157                                                        | 0.511                          | 2344.33            | 1197.65            | 0.080                          | 1504.80            | 120.45             |
| A_68_P22210127 | chr3:67267701-67267745                            | NM_016753:107          | Lxn           | INSIDE                 | 0.157                                                        | 1.760                          | 6664.05            | 11727.54           | 0.276                          | 4566.69            | 1259.04            |
| A_68_P32691811 | chrX:135448869-135448913                          | NM_013724:-78          | Nrk           | PROMOTER               | 0.157                                                        | 2.243                          | 12204.76           | 27377.88           | 0.353                          | 4834.37            | 1705.29            |
| A_68_P23277936 | chr4:125736057-125736104                          | NM_172701:272          | Osep1         | INSIDE                 | 0.157                                                        | 2.357                          | 6203.43            | 14621.64           | 0.370                          | 4070.21            | 1506.50            |
| A_68_P28397153 | chr12:45370604-45370657                           | NM_026164:490          | Rnpla8        | INSIDE                 | 0.157                                                        | 0.609                          | 1835.36            | 1116.95            | 0.095                          | 1290.54            | 123.05             |
| A_68_P22778505 | chr4:22414595-22414639                            | NM_008899:662          | Pou3f2        | INSIDE                 | 0.157                                                        | 1.647                          | 4813.48            | 7929.94            | 0.259                          | 3343.69            | 864.41             |
| A_68_P23656663 | chr5:45841705-45841749                            | NM_024236:-258         | Qdpr          | DIVERGENT_PROMOTER     | 0.157                                                        | 0.492                          | 1967.61            | 968.18             | 0.077                          | 1556.45            | 120.01             |
| A_68_P25377911 | chr7:109398265-109398309                          | NM_019566:346          | Rhog          | INSIDE                 | 0.157                                                        | 0.505                          | 1887.92            | 952.76             | 0.079                          | 1453.13            | 115.33             |
| A_68_P30013961 | chr15:10966774-10966818                           | NM_178717:927          | Rxfp3         | INSIDE                 | 0.157                                                        | 0.697                          | 4372.73            | 3046.88            | 0.109                          | 3396.17            | 371.03             |
| A_68_P26574110 | chr9:62993652-62993696                            | NM_172446:1113         | Skor1         | INSIDE                 | 0.157                                                        | 0.575                          | 1920.92            | 1104.72            | 0.090                          | 1307.67            | 117.97             |
| A_68_P21221439 | chr2:52601733-52601777                            | NM_019667:-571         | Stam2         | PROMOTER               | 0.157                                                        | 0.671                          | 1572.17            | 1054.98            | 0.105                          | 1138.67            | 119.99             |
| A_68_P24591245 | chr6:83019654-83019698                            | NM_009392:543          | Tlx2          | INSIDE                 | 0.157                                                        | 0.470                          | 2183.16            | 1026.90            | 0.074                          | 1742.88            | 128.83             |
| A_68_P28853132 | chr13:17786964-17787008                           | NM_025479:-260         | 2810021B07Rik | DIVERGENT_PROMOTER     | 0.156                                                        | 0.737                          | 2772.38            | 2041.88            | 0.115                          | 1955.65            | 224.62             |
| A_68_P24045430 | chr5:122043561-122043605                          | NM_009656:251          | Aldh2         | INSIDE                 | 0.156                                                        | 0.476                          | 3110.23            | 1481.66            | 0.074                          | 2240.34            | 165.99             |
| A_68_P24172962 | chr5:148115952-148116010                          | NM_007673:2845         | Cdx2          | INSIDE                 | 0.156                                                        | 0.580                          | 1919.73            | 1113.43            | 0.091                          | 1311.99            | 118.90             |
| A_68_P30476587 | chr15:98636550-98636594                           | NM_001013741:1784      | Ddn           | INSIDE                 | 0.156                                                        | 0.636                          | 1771.26            | 1126.18            | 0.099                          | 1304.68            | 129.63             |
| A_68_P28672817 | chr12:100138890-100138934                         | NM_001081191:782       | Eml5          | INSIDE                 | 0.156                                                        | 0.608                          | 2431.43            | 1478.25            | 0.095                          | 1894.60            | 179.73             |
| A_68_P23582142 | chr5:32435789-32435833                            | NM_008037:-3034        | Fosl2         | PROMOTER               | 0.156                                                        | 0.658                          | 1698.17            | 1117.73            | 0.103                          | 1267.59            | 130.06             |
| A_68_P31213682 | chr17:47831829-47831878                           | NM_144939:-302         | Frs3          | DIVERGENT_PROMOTER     | 0.156                                                        | 0.518                          | 2006.03            | 1039.56            | 0.081                          | 1492.51            | 121.04             |
| A_68_P32213514 | chr19:58529502-58529546                           | NM_010279:-568         | Gfra1         | PROMOTER               | 0.156                                                        | 0.544                          | 2506.69            | 1362.64            | 0.085                          | 1910.18            | 161.47             |
| A_68_P25727978 | chr8:26707398-26707452                            | NM_173012:535          | Letm2         | INSIDE                 | 0.156                                                        | 0.694                          | 1541.18            | 1069.57            | 0.108                          | 1101.85            | 119.26             |
| A_68_P22601419 | chr3:143865258-143865302                          | NM_001161770:116       | Lmo4          | INSIDE                 | 0.156                                                        | 0.603                          | 2736.89            | 1650.83            | 0.094                          | 1758.72            | 165.69             |
| A_68_P21642726 | chr2:132704942-132704986                          | NM_177303:1634         | Lrm4          | INSIDE                 | 0.156                                                        | 0.508                          | 1990.75            | 1011.60            | 0.079                          | 1456.84            | 115.15             |
| A_68_P31208333 | chr17:46818209-46818253                           | NM_010787:145          | Mea1          | INSIDE                 | 0.156                                                        | 0.716                          | 1656.82            | 1185.83            | 0.111                          | 1208.63            | 134.59             |
| A_68_P28047118 | chr11:96711362-96711406                           | NR_029562:-322         | Mir152        | PROMOTER               | 0.156                                                        | 0.708                          | 1874.02            | 1327.33            | 0.110                          | 1395.07            | 154.09             |
| A_68_P32465509 | chrX:71167300-71167346                            | NM_001177965:-39       | Naa10         | PROMOTER               | 0.156                                                        | 1.382                          | 1542.19            | 2131.35            | 0.215                          | 558.92             | 120.40             |
| A_68_P29773648 | chr14:84846227-84846278                           | NM_001013753:2883      | Pedh17        | INSIDE                 | 0.156                                                        | 0.714                          | 1627.35            | 1162.52            | 0.111                          | 1097.28            | 122.18             |
| A_68_P23271505 | chr4:124667492-124667536                          | NM_138683:3841         | Rspo1         | INSIDE                 | 0.156                                                        | 0.622                          | 1647.29            | 1024.08            | 0.097                          | 1286.56            | 124.97             |
| A_68_P30595530 | chr16:22009516-22009560                           | NM_029457:-18          | Serp2         | PROMOTER               | 0.156                                                        | 0.564                          | 1753.46            | 989.64             | 0.088                          | 1411.18            | 124.37             |
| A_68_P25989169 | chr8:81033142-81033186                            | NM_029736:-69          | Slc10a7       | DIVERGENT_PROMOTER     | 0.156                                                        | 0.647                          | 2714.74            | 1756.46            | 0.101                          | 2096.02            | 211.97             |
| A_68_P23322943 | chr4:134024577-134024621                          | NM_019641:364          | Stmn1         | INSIDE                 | 0.156                                                        | 0.645                          | 2161.19            | 1392.93            | 0.100                          | 1533.24            | 153.95             |
| A_68_P23325609 | chr4:134487161-134487205                          | NM_026780:288          | Syf2          | INSIDE                 | 0.156                                                        | 0.486                          | 2314.27            | 1123.92            | 0.076                          | 1624.03            | 122.75             |
| A_68_P22338876 | chr3:94217322-94217366                            | NM_028307:105          | Tdrkh         | INSIDE                 | 0.156                                                        | 1.368                          | 9561.43            | 13081.72           | 0.214                          | 6500.13            | 1391.10            |
| A_68_P32136793 | chr19:45227850-45227894                           | NM_021901:2668         | Tlx1          | INSIDE                 | 0.156                                                        | 0.650                          | 5489.08            | 3566.55            | 0.101                          | 3798.26            | 384.68             |
| A_68_P28225579 | chr12:8980872-8980920                             | NM_001159527:90        | Wdr35         | INSIDE                 | 0.156                                                        | 0.649                          | 1687.23            | 1094.60            | 0.101                          | 1151.98            | 116.56             |
| A_68_P29671858 | chr14:65768534-65768580                           | BC096449:686333        |               | DOWNSTREAM             | 0.156                                                        | 2.613                          | 4200.27            | 10975.38           | 0.406                          | 2559.50            | 1040.06            |

| ProbeName      | Target position of probe on CpG island microarray | TargetID                | GeneSymbol    | CpG island Description | Ratio of relative methylation (TiO <sub>2</sub> -NP/Vehicle) | Sham group                     |                    |                    | TiO <sub>2</sub> -H group      |                    |                    |
|----------------|---------------------------------------------------|-------------------------|---------------|------------------------|--------------------------------------------------------------|--------------------------------|--------------------|--------------------|--------------------------------|--------------------|--------------------|
|                |                                                   |                         |               |                        |                                                              | Relative methylation (Cy5/Cy3) | Cy3 signal (Input) | Cy5 signal (MeDIP) | Relative methylation (Cy5/Cy3) | Cy3 signal (Input) | Cy5 signal (MeDIP) |
| A_68_P25737282 | chr8:28338659-28338703                            | NM_013462:1380          | Adrb3         | INSIDE                 | 0.155                                                        | 0.659                          | 2667.12            | 1756.75            | 0.102                          | 1824.16            | 186.68             |
| A_68_P24160789 | chr5:145119094-145119138                          | NM_025833:-135          | Baiap211      | PROMOTER               | 0.155                                                        | 0.461                          | 2338.47            | 1077.40            | 0.071                          | 1862.46            | 132.88             |
| A_68_P28184672 | chr11:120319589-120319633                         | NM_152807:168           | Ccdc137       | INSIDE                 | 0.155                                                        | 0.666                          | 1592.81            | 1060.55            | 0.103                          | 1147.62            | 118.38             |
| A_68_P24831041 | chr6:127100503-127100547                          | NM_009829:542           | Cend2         | INSIDE                 | 0.155                                                        | 0.605                          | 1758.37            | 1063.19            | 0.094                          | 1315.53            | 123.56             |
| A_68_P22663511 | chr3:154259686-154259731                          | NM_009968:-267          | Cryz          | PROMOTER               | 0.155                                                        | 0.472                          | 2252.36            | 1062.45            | 0.073                          | 1605.74            | 117.14             |
| A_68_P32224193 | chr19:60302406-60302450                           | NM_029648:172           | D19Ertid737c  | INSIDE                 | 0.155                                                        | 0.696                          | 1366.16            | 951.17             | 0.108                          | 1088.68            | 117.33             |
| A_68_P25950970 | chr8:72826351-72826395                            | NM_001024922:-21        | Ddx49         | DIVERGENT_PROMOTER     | 0.155                                                        | 0.543                          | 2324.12            | 1261.95            | 0.084                          | 1634.63            | 137.64             |
| A_68_P20353314 | chr1:75314278-75314322                            | NM_001110831:-88        | Dnpep         | PROMOTER               | 0.155                                                        | 0.484                          | 2326.43            | 1126.36            | 0.075                          | 1794.33            | 134.37             |
| A_68_P32364768 | chrX:45807315-45807359                            | NM_019680:8973          | Elf4          | INSIDE                 | 0.155                                                        | 1.674                          | 3291.28            | 5510.12            | 0.260                          | 1215.78            | 315.94             |
| A_68_P21107213 | chr2:30996649-30996693                            | NM_001038700:858        | Fnbp1         | INSIDE                 | 0.155                                                        | 0.658                          | 1885.44            | 1241.40            | 0.102                          | 1219.02            | 124.70             |
| A_68_P28604312 | chr12:86814373-86814417                           | NM_010234:-456          | Fos           | PROMOTER               | 0.155                                                        | 0.490                          | 1847.43            | 904.56             | 0.076                          | 1536.61            | 116.89             |
| A_68_P27278157 | chr10:79132042-79132087                           | NM_148934:-90           | Gm16517       | PROMOTER               | 0.155                                                        | 0.511                          | 1817.73            | 928.53             | 0.079                          | 1486.61            | 117.85             |
| A_68_P24501236 | chr6:63206960-63207004                            | NM_008167:132           | Grid2         | INSIDE                 | 0.155                                                        | 0.458                          | 2045.42            | 937.19             | 0.071                          | 1639.64            | 116.76             |
| A_68_P29055020 | chr13:55545946-55545990                           | NM_011938:-726          | Grk6          | PROMOTER               | 0.155                                                        | 1.478                          | 810.86             | 1198.23            | 0.229                          | 513.73             | 117.72             |
| A_68_P28883386 | chr13:23855470-23855521                           | NM_030609:-41           | Hist1h1a      | DIVERGENT_PROMOTER     | 0.155                                                        | 0.727                          | 4442.08            | 3230.36            | 0.113                          | 3046.22            | 342.78             |
| A_68_P21147687 | chr2:38212141-38212185                            | NM_010710:5335          | Lhx2          | INSIDE                 | 0.155                                                        | 0.638                          | 2348.15            | 1498.43            | 0.099                          | 1624.60            | 161.05             |
| A_68_P26815492 | chr9:108470126-108470170                          | NM_023247:-475          | Ndufa3        | DIVERGENT_PROMOTER     | 0.155                                                        | 1.401                          | 2272.14            | 3182.58            | 0.217                          | 1525.04            | 331.05             |
| A_68_P32127987 | chr19:43750198-43750243                           | NM_145156:-849          | Sle2sa28      | PROMOTER               | 0.155                                                        | 0.696                          | 1895.01            | 1319.27            | 0.108                          | 1366.48            | 147.51             |
| A_68_P27365026 | chr10:94878069-94878116                           | NM_001168657:-175       | Socs2         | PROMOTER               | 0.155                                                        | 1.339                          | 2319.06            | 3105.68            | 0.207                          | 1617.09            | 335.02             |
| A_68_P30570619 | chr16:16829103-16829147                           | NM_015773:332           | Spag6         | INSIDE                 | 0.155                                                        | 0.527                          | 4089.76            | 2155.27            | 0.082                          | 3015.83            | 245.92             |
| A_68_P25232260 | chr7:81157728-81157772                            | NM_009181:818           | St8sia2       | INSIDE                 | 0.155                                                        | 0.486                          | 2003.93            | 974.16             | 0.075                          | 1564.10            | 117.54             |
| A_68_P28087056 | chr11:103635473-103635522                         | NM_009521:9             | Wnt3          | INSIDE                 | 0.155                                                        | 0.606                          | 1689.48            | 1023.53            | 0.094                          | 1284.16            | 120.59             |
| A_68_P27781837 | chr11:49016791-49016837                           | NM_001024846:-187       | Zfp62         | PROMOTER               | 0.155                                                        | 1.535                          | 747.40             | 1147.24            | 0.238                          | 520.00             | 123.51             |
| A_68_P29671859 | chr14:65768667-65768711                           | BC096449:686465         |               | DOWNSTREAM             | 0.155                                                        | 1.363                          | 10339.02           | 14096.99           | 0.211                          | 6234.80            | 1316.59            |
| A_68_P24482545 | chr6:58590224-58590281                            | NM_011920:43587         | Abcg2         | INSIDE                 | 0.154                                                        | 0.712                          | 1539.68            | 1095.49            | 0.109                          | 1144.30            | 125.11             |
| A_68_P21061287 | chr2:22924684-22924728                            | NM_001102437:115        | Acbd5         | INSIDE                 | 0.154                                                        | 1.430                          | 5212.07            | 7455.00            | 0.220                          | 3718.61            | 816.61             |
| A_68_P28118515 | chr11:109287477-109287521                         | NM_025275:239           | Amz2          | INSIDE                 | 0.154                                                        | 0.616                          | 1711.81            | 1054.24            | 0.095                          | 1242.60            | 117.91             |
| A_68_P26595468 | chr9:66682422-66682466                            | NM_026674:69            | Aph1c         | INSIDE                 | 0.154                                                        | 0.471                          | 3924.39            | 1849.39            | 0.073                          | 2883.89            | 209.19             |
| A_68_P27308093 | chr10:84850152-84850196                           | NM_028709:616           | Btbd11        | INSIDE                 | 0.154                                                        | 0.453                          | 3317.82            | 1504.20            | 0.070                          | 2310.99            | 160.95             |
| A_68_P24057000 | chr5:124133425-124133474                          | NM_019765:851           | Clip1         | INSIDE                 | 0.154                                                        | 0.570                          | 1792.18            | 1020.80            | 0.088                          | 1374.02            | 120.69             |
| A_68_P32128432 | chr19:43827652-43827696                           | NM_001113562:162        | Cute          | INSIDE                 | 0.154                                                        | 0.546                          | 5862.75            | 3201.70            | 0.084                          | 4363.22            | 367.43             |
| A_68_P26473573 | chr9:45239483-45239530                            | NM_001081270:1131       | Dscaml1       | INSIDE                 | 0.154                                                        | 0.525                          | 1944.60            | 1019.95            | 0.081                          | 1516.86            | 122.16             |
| A_68_P32227250 | chr19:60866724-60866768                           | NM_010123:-150          | Eif3a         | PROMOTER               | 0.154                                                        | 0.701                          | 1395.48            | 977.90             | 0.108                          | 1126.20            | 121.40             |
| A_68_P24078735 | chr5:128112945-128112989                          | NM_177005:335           | Glt1d1        | INSIDE                 | 0.154                                                        | 0.586                          | 1799.84            | 1054.40            | 0.090                          | 1351.22            | 122.23             |
| A_68_P23591969 | chr5:34326576-34326620                            | NM_001033458:476        | Gm1673        | INSIDE                 | 0.154                                                        | 0.456                          | 2418.12            | 1102.67            | 0.070                          | 1711.46            | 119.90             |
| A_68_P22391857 | chr3:104315282-104315333                          | NM_001025067:472        | Lrig2         | INSIDE                 | 0.154                                                        | 0.657                          | 1835.53            | 1206.21            | 0.101                          | 1503.48            | 152.02             |
| A_68_P29643653 | chr14:60884373-60884418                           | NM_144843:331           | Mtmr6         | INSIDE                 | 0.154                                                        | 0.610                          | 1562.70            | 953.37             | 0.094                          | 1241.19            | 116.93             |
| A_68_P30382864 | chr15:82169262-82169306                           | NM_008669:-28           | Naga          | DIVERGENT_PROMOTER     | 0.154                                                        | 0.637                          | 1530.88            | 975.38             | 0.098                          | 1260.29            | 123.30             |
| A_68_P26242539 | chr8:126473498-126473548                          | NM_172288:-357          | Nup133        | PROMOTER               | 0.154                                                        | 0.579                          | 1680.69            | 973.87             | 0.089                          | 1301.58            | 116.11             |
| A_68_P32134818 | chr19:44911149-44911193                           | NM_011037:79287         | Pax2          | INSIDE                 | 0.154                                                        | 0.626                          | 6495.60            | 4068.15            | 0.096                          | 4693.29            | 452.72             |
| A_68_P23228358 | chr4:115894280-115894324                          | NM_181585:-216          | Pik3r3        | PROMOTER               | 0.154                                                        | 0.481                          | 1913.43            | 920.52             | 0.074                          | 1611.99            | 119.44             |
| A_68_P20348978 | chr1:74551985-74552034                            | NM_021383:-624          | Rqcd1         | PROMOTER               | 0.154                                                        | 0.670                          | 1504.09            | 1007.87            | 0.103                          | 1193.56            | 123.26             |
| A_68_P26814193 | chr9:108208141-108208185                          | NM_133986:120           | Teta          | INSIDE                 | 0.154                                                        | 0.478                          | 2565.09            | 1226.13            | 0.073                          | 1787.83            | 131.22             |
| A_68_P28744113 | chr12:112680513-112680557                         | NM_009396:-337          | Tnfrap2       | PROMOTER               | 0.154                                                        | 0.680                          | 2124.48            | 1444.75            | 0.105                          | 1578.48            | 165.41             |
| A_68_P25018371 | chr7:28438749-28438793                            | NM_028417:-172          | Ttc9b         | PROMOTER               | 0.154                                                        | 0.678                          | 3610.47            | 2446.11            | 0.104                          | 2537.41            | 264.46             |
| A_68_P26710502 | chr9:88418231-88418277                            | ENSMUST00000034997:-533 |               | PROMOTER               | 0.154                                                        | 0.564                          | 1951.89            | 1101.11            | 0.087                          | 1382.69            | 120.21             |
| A_68_P23746644 | chr5:64040795-64040839                            | NM_177006:475           | 3110047P20Rik | INSIDE                 | 0.153                                                        | 0.509                          | 1926.17            | 981.37             | 0.078                          | 1544.37            | 120.72             |
| A_68_P25327115 | chr7:100023177-100023221                          | NM_001080995:-456       | 4632434I1Rik  | DIVERGENT_PROMOTER     | 0.153                                                        | 1.432                          | 4311.10            | 6174.69            | 0.219                          | 2980.57            | 653.60             |
| A_68_P25509653 | chr7:135381206-135381250                          | NM_177001:317           | 9130023H24Rik | INSIDE                 | 0.153                                                        | 0.636                          | 2384.71            | 1516.26            | 0.097                          | 1502.10            | 145.82             |
| A_68_P31922243 | chr19:4282842-4282886                             | NM_026720:273           | Ankrd13d      | INSIDE                 | 0.153                                                        | 0.627                          | 3628.31            | 2276.09            | 0.096                          | 2599.10            | 249.14             |
| A_68_P22128530 | chr3:51028680-51028724                            | NM_009834:334           | Cern4l        | INSIDE                 | 0.153                                                        | 0.490                          | 2018.20            | 989.37             | 0.075                          | 1568.82            | 117.60             |



| ProbeName      | Target position of probe on CpG island microarray | TargetID                 | GeneSymbol    | CpG island Description | Ratio of relative methylation (TiO <sub>2</sub> -NP/Vehicle) | Sham group                     |                    |                    | TiO <sub>2</sub> -H group      |                    |                    |
|----------------|---------------------------------------------------|--------------------------|---------------|------------------------|--------------------------------------------------------------|--------------------------------|--------------------|--------------------|--------------------------------|--------------------|--------------------|
|                |                                                   |                          |               |                        |                                                              | Relative methylation (Cy5/Cy3) | Cy3 signal (Input) | Cy5 signal (MeDIP) | Relative methylation (Cy5/Cy3) | Cy3 signal (Input) | Cy5 signal (MeDIP) |
| A_68_P23005993 | chr4:70071160-70071204                            | NM_145990:219            | Cdk5rap2      | INSIDE                 | 0.153                                                        | 0.647                          | 5103.18            | 3300.01            | 0.099                          | 3635.49            | 359.90             |
| A_68_P27504659 | chr10:121079155-121079199                         | NM_177335:420            | D930020B18Rik | INSIDE                 | 0.153                                                        | 0.702                          | 2104.99            | 1478.60            | 0.108                          | 1535.01            | 165.34             |
| A_68_P26224698 | chr8:123652159-123652203                          | NM_008024:596            | Foxl1         | INSIDE                 | 0.153                                                        | 0.610                          | 1808.61            | 1102.87            | 0.094                          | 1324.91            | 123.89             |
| A_68_P28882027 | chr13:23627101-23627153                           | NM_145073:-160           | Hist1h3g      | PROMOTER               | 0.153                                                        | 0.617                          | 1652.11            | 1018.62            | 0.094                          | 1282.28            | 120.61             |
| A_68_P31615691 | chr18:35113624-35113674                           | NM_010481:357            | Hspa9         | INSIDE                 | 0.153                                                        | 0.436                          | 2560.61            | 1117.66            | 0.067                          | 1810.03            | 120.69             |
| A_68_P31109175 | chr17:26390511-26390556                           | NM_025881:679            | Luc7l         | INSIDE                 | 0.153                                                        | 0.671                          | 1465.52            | 983.62             | 0.103                          | 1192.28            | 122.58             |
| A_68_P23308627 | chr4:131399668-131399712                          | NM_025297:305            | Meer          | INSIDE                 | 0.153                                                        | 0.516                          | 1774.46            | 915.24             | 0.079                          | 1464.90            | 115.24             |
| A_68_P23536410 | chr5:22939501-22939545                            | NM_026984:-724           | Mil5          | PROMOTER               | 0.153                                                        | 0.549                          | 2304.38            | 1265.79            | 0.084                          | 1735.97            | 145.75             |
| A_68_P27293631 | chr10:82226680-82226728                           | NM_010914:182            | Nfyb          | INSIDE                 | 0.153                                                        | 0.717                          | 1409.74            | 1010.22            | 0.110                          | 1117.02            | 122.44             |
| A_68_P28004879 | chr11:89160026-89160082                           | NM_008711:3819           | Nog           | DOWNSTREAM             | 0.153                                                        | 0.688                          | 1607.67            | 1106.36            | 0.105                          | 1171.61            | 123.17             |
| A_68_P26268784 | chr8:130883235-130883284                          | NM_008737:287            | Nrp1          | INSIDE                 | 0.153                                                        | 0.498                          | 2154.51            | 1073.27            | 0.076                          | 1558.54            | 118.92             |
| A_68_P30139524 | chr15:36538383-36538427                           | NM_008774:324            | Pabpc1        | INSIDE                 | 0.153                                                        | 0.710                          | 8352.49            | 5929.71            | 0.109                          | 5975.04            | 650.28             |
| A_68_P28458300 | chr12:57797914-57797958                           | NM_011041:1311           | Pax9          | INSIDE                 | 0.153                                                        | 0.445                          | 2475.66            | 1102.51            | 0.068                          | 1790.79            | 122.04             |
| A_68_P22518658 | chr3:128907203-128907247                          | NM_001042502:-9630       | Pitx2         | PROMOTER               | 0.153                                                        | 0.574                          | 1612.92            | 925.36             | 0.088                          | 1370.17            | 120.64             |
| A_68_P29619512 | chr14:56340802-56340846                           | NM_019519:189            | Rabgga        | INSIDE                 | 0.153                                                        | 1.548                          | 4599.91            | 7122.05            | 0.237                          | 2634.55            | 624.59             |
| A_68_P21783953 | chr2:158439712-158439756                          | NM_009508:3241           | Slc32a1       | INSIDE                 | 0.153                                                        | 0.524                          | 4106.70            | 2153.66            | 0.080                          | 2916.93            | 233.58             |
| A_68_P32147457 | chr19:47142031-47142081                           | NM_177342:-181           | Taf5          | PROMOTER               | 0.153                                                        | 0.465                          | 2668.17            | 1239.73            | 0.071                          | 1920.01            | 136.51             |
| A_68_P28974205 | chr13:40828820-40828871                           | NM_001122948:-3033       | Tefap2a       | PROMOTER               | 0.153                                                        | 0.716                          | 1524.23            | 1091.89            | 0.110                          | 1085.20            | 119.10             |
| A_68_P25465171 | chr7:126863923-126863967                          | NM_145585:335            | Thumpd1       | INSIDE                 | 0.153                                                        | 0.457                          | 2540.49            | 1162.22            | 0.070                          | 1716.53            | 120.47             |
| A_68_P27780214 | chr11:48651115-48651159                           | NM_053166:11497          | Trim7         | INSIDE                 | 0.153                                                        | 0.541                          | 2002.24            | 1083.94            | 0.083                          | 1477.48            | 122.07             |
| A_68_P22934130 | chr4:55493545-55493589                            |                          | Unknown       |                        | 0.153                                                        | 0.675                          | 1467.98            | 991.37             | 0.103                          | 1173.35            | 120.91             |
| A_68_P25714451 | chr8:24168891-24168935                            | NM_031158:166            | Ank1          | INSIDE                 | 0.152                                                        | 0.525                          | 2178.04            | 1142.55            | 0.080                          | 1552.58            | 124.11             |
| A_68_P29122630 | chr13:70776238-70776282                           | NM_144837:252            | BC018507      | INSIDE                 | 0.152                                                        | 0.658                          | 4530.78            | 2981.85            | 0.100                          | 3223.00            | 323.04             |
| A_68_P32289634 | chrX:20265458-20265502                            | NM_011049:-138           | Cdk16         | PROMOTER               | 0.152                                                        | 1.369                          | 1922.20            | 2631.62            | 0.208                          | 800.76             | 166.60             |
| A_68_P30589168 | chr16:20716549-20716593                           | NM_009900:139            | Clen2         | INSIDE                 | 0.152                                                        | 0.551                          | 1863.85            | 1027.07            | 0.084                          | 1407.81            | 118.24             |
| A_68_P24359961 | chr6:35084163-35084220                            | NM_001164412:-454        | Cnot4         | PROMOTER               | 0.152                                                        | 0.699                          | 1378.85            | 964.29             | 0.106                          | 1083.88            | 115.12             |
| A_68_P27171642 | chr10:59414981-59415025                           | NM_029083:-484           | Ddit4         | PROMOTER               | 0.152                                                        | 0.481                          | 2143.31            | 1031.59            | 0.073                          | 1604.35            | 117.23             |
| A_68_P27386030 | chr10:98725559-98725613                           | NM_026268:-278           | Dusp6         | PROMOTER               | 0.152                                                        | 0.577                          | 1825.14            | 1052.84            | 0.087                          | 1325.87            | 115.94             |
| A_68_P29683700 | chr14:67854699-67854743                           | NM_010095:2592           | Ebf2          | INSIDE                 | 0.152                                                        | 0.685                          | 3435.06            | 2351.80            | 0.104                          | 2541.11            | 264.34             |
| A_68_P30328931 | chr15:73015939-73015989                           | NM_153178:-587           | Eif2e2        | PROMOTER               | 0.152                                                        | 0.665                          | 1581.51            | 1051.35            | 0.101                          | 1152.23            | 116.70             |
| A_68_P31610611 | chr18:34166774-34166818                           | NM_013512:64             | Epb4.114a     | INSIDE                 | 0.152                                                        | 0.690                          | 1760.82            | 1215.32            | 0.105                          | 1416.16            | 148.78             |
| A_68_P28056288 | chr11:98273791-98273835                           | NM_001003817:15          | Erbp2         | INSIDE                 | 0.152                                                        | 0.634                          | 4465.48            | 2830.37            | 0.096                          | 3259.86            | 313.39             |
| A_68_P20259678 | chr1:58643163-58643207                            | NM_172513:-7             | Fam126b       | DIVERGENT_PROMOTER     | 0.152                                                        | 0.600                          | 1947.22            | 1167.79            | 0.091                          | 1468.06            | 133.54             |
| A_68_P32467038 | chrX:71491563-71491607                            | NM_010227:289            | Flna          | INSIDE                 | 0.152                                                        | 1.538                          | 2086.99            | 3209.16            | 0.234                          | 721.94             | 168.92             |
| A_68_P28924078 | chr13:31718670-31718714                           | NM_010225:1008           | Foxf2         | INSIDE                 | 0.152                                                        | 0.455                          | 2481.07            | 1129.51            | 0.069                          | 1703.53            | 118.08             |
| A_68_P28684633 | chr12:102137516-102137560                         | NM_001177674:196         | Gpr68         | INSIDE                 | 0.152                                                        | 0.514                          | 2130.13            | 1094.36            | 0.078                          | 1553.16            | 121.28             |
| A_68_P26580968 | chr9:64100873-64100917                            | NM_008927:518            | Map2k1        | INSIDE                 | 0.152                                                        | 0.433                          | 2290.58            | 991.80             | 0.066                          | 1770.03            | 116.82             |
| A_68_P31130472 | chr17:30026258-30026302                           | NM_001081160:-1453       | Mdga1         | PROMOTER               | 0.152                                                        | 0.662                          | 2377.77            | 1573.85            | 0.101                          | 1842.43            | 185.49             |
| A_68_P26345184 | chr9:20841202-20841246                            | NR_035438:-4452          | Mir1900       | PROMOTER               | 0.152                                                        | 0.572                          | 1863.06            | 1065.66            | 0.087                          | 1419.14            | 123.28             |
| A_68_P28058586 | chr11:98656221-98656265                           | NM_028722:-840           | Msl1          | PROMOTER               | 0.152                                                        | 0.653                          | 5236.24            | 3417.67            | 0.099                          | 3424.99            | 339.57             |
| A_68_P20010817 | chr1:5907429-5907473                              | NM_010342:29             | Npbwr1        | INSIDE                 | 0.152                                                        | 0.543                          | 1572.48            | 854.32             | 0.082                          | 1421.97            | 117.09             |
| A_68_P29237543 | chr13:95647408-95647452                           | NM_011021:1849           | Otp           | INSIDE                 | 0.152                                                        | 0.566                          | 1800.61            | 1019.69            | 0.086                          | 1393.42            | 120.19             |
| A_68_P32775563 | chrX:156064795-156064839                          | NM_001135727:-523        | Sh3kbp1       | PROMOTER               | 0.152                                                        | 1.691                          | 1378.43            | 2330.66            | 0.257                          | 510.94             | 131.07             |
| A_68_P32427540 | chrX:61528858-61528902                            | NM_178740:1291           | Slitrk4       | INSIDE                 | 0.152                                                        | 1.779                          | 2360.34            | 4199.69            | 0.270                          | 913.40             | 247.07             |
| A_68_P25102502 | chr7:54263847-54263895                            | NM_175318:-86            | Spty2d1       | PROMOTER               | 0.152                                                        | 0.552                          | 1815.47            | 1001.40            | 0.084                          | 1421.04            | 119.51             |
| A_68_P31131059 | chr17:30141179-30141223                           | NM_148926:-831           | Zfand3        | PROMOTER               | 0.152                                                        | 0.563                          | 1954.31            | 1101.06            | 0.086                          | 1466.94            | 125.93             |
| A_68_P29102456 | chr13:65344000-65344046                           |                          | Unknown       |                        | 0.152                                                        | 2.405                          | 1526.80            | 3671.76            | 0.367                          | 1065.66            | 390.79             |
| A_68_P33013891 | chrUn_random:3233790-3233834                      |                          | Unknown       |                        | 0.152                                                        | 0.655                          | 1583.16            | 1037.06            | 0.100                          | 1183.12            | 117.84             |
| A_68_P32601442 | chrX:109008049-109008100                          |                          | Unknown       |                        | 0.152                                                        | 2.064                          | 884.33             | 1825.25            | 0.314                          | 374.36             | 117.47             |
| A_68_P21705753 | chr2:143991362-143991406                          | ENSMUST00000099292:23642 |               | DOWNSTREAM             | 0.152                                                        | 0.355                          | 2890.18            | 1026.68            | 0.054                          | 2188.81            | 118.30             |
| A_68_P24810291 | chr6:122714891-122714935                          | ENSMUST00000171541:15063 |               | INSIDE                 | 0.152                                                        | 0.609                          | 1809.84            | 1102.81            | 0.093                          | 1327.61            | 123.12             |

| ProbeName      | Target position of probe on CpG island microarray | TargetID          | GeneSymbol    | CpG island Description | Ratio of relative methylation (TiO <sub>2</sub> -NP/Vehicle) | Sham group                     |                    |                    | TiO <sub>2</sub> -H group      |                    |                    |
|----------------|---------------------------------------------------|-------------------|---------------|------------------------|--------------------------------------------------------------|--------------------------------|--------------------|--------------------|--------------------------------|--------------------|--------------------|
|                |                                                   |                   |               |                        |                                                              | Relative methylation (Cy5/Cy3) | Cy3 signal (Input) | Cy5 signal (MeDIP) | Relative methylation (Cy5/Cy3) | Cy3 signal (Input) | Cy5 signal (MeDIP) |
| A_68_P31599400 | chr18:31919398-31919452                           | NM_153515:-109    | Ammecr11      | PROMOTER               | 0.151                                                        | 0.448                          | 2364.51            | 1060.24            | 0.068                          | 1841.00            | 124.67             |
| A_68_P25677405 | chr8:14911386-14911430                            | NM_001037736:-308 | Arhgef10      | PROMOTER               | 0.151                                                        | 0.581                          | 2206.29            | 1282.91            | 0.088                          | 1550.03            | 136.06             |
| A_68_P28976951 | chr13:41345598-41345642                           | NM_001135577:408  | BC024659      | INSIDE                 | 0.151                                                        | 0.571                          | 2558.07            | 1461.88            | 0.086                          | 1951.13            | 168.75             |
| A_68_P27281431 | chr10:79630462-79630506                           | NM_007705:-101    | Cirbp         | PROMOTER               | 0.151                                                        | 0.509                          | 2366.89            | 1205.70            | 0.077                          | 1611.98            | 123.75             |
| A_68_P23970972 | chr5:108697917-108697961                          | NM_026106:23      | Dr1           | INSIDE                 | 0.151                                                        | 0.408                          | 3760.10            | 1533.47            | 0.062                          | 2765.36            | 170.10             |
| A_68_P22803175 | chr4:28740439-28740495                            | NM_001122889:172  | Epha7         | INSIDE                 | 0.151                                                        | 0.657                          | 2030.47            | 1333.44            | 0.099                          | 1663.44            | 164.59             |
| A_68_P32135376 | chr19:45005642-45005686                           | NM_001081225:56   | Fam178a       | INSIDE                 | 0.151                                                        | 0.690                          | 1515.64            | 1046.26            | 0.104                          | 1121.45            | 116.78             |
| A_68_P24131922 | chr5:139297257-139297301                          | NM_001195128:1245 | Gm5294        | INSIDE                 | 0.151                                                        | 0.538                          | 2285.55            | 1229.21            | 0.081                          | 1741.04            | 141.62             |
| A_68_P22531297 | chr3:130974718-130974765                          | NM_008212:214     | Hadh          | INSIDE                 | 0.151                                                        | 0.468                          | 2361.74            | 1105.35            | 0.071                          | 1734.32            | 122.67             |
| A_68_P30991210 | chr16:96349056-96349100                           | NM_008251:254     | Hmgn1         | INSIDE                 | 0.151                                                        | 0.564                          | 2242.06            | 1264.82            | 0.085                          | 1657.50            | 141.29             |
| A_68_P23120706 | chr4:94717919-94717966                            | NM_010591:971     | Jun           | INSIDE                 | 0.151                                                        | 0.574                          | 2266.77            | 1300.54            | 0.087                          | 1636.71            | 142.02             |
| A_68_P30423408 | chr15:88971259-88971303                           | NM_013871:-147    | Mapk12        | PROMOTER               | 0.151                                                        | 0.661                          | 1607.55            | 1062.25            | 0.100                          | 1190.75            | 118.98             |
| A_68_P25955965 | chr8:73796966-73797010                            | NM_001142322:376  | Myo9b         | INSIDE                 | 0.151                                                        | 0.700                          | 2562.07            | 1792.89            | 0.106                          | 1903.58            | 201.38             |
| A_68_P21107807 | chr2:31101894-31101938                            | NM_019681:474     | Nes1          | INSIDE                 | 0.151                                                        | 0.584                          | 1890.14            | 1103.28            | 0.088                          | 1415.86            | 125.00             |
| A_68_P23415890 | chr4:151370343-151370387                          | NM_172705:-76     | Phf13         | PROMOTER               | 0.151                                                        | 0.431                          | 2263.75            | 974.70             | 0.065                          | 1857.21            | 121.13             |
| A_68_P32464004 | chrX:70904998-70905042                            | NM_001199351:173  | Pnck          | INSIDE                 | 0.151                                                        | 2.664                          | 9345.08            | 24897.50           | 0.401                          | 3853.71            | 1545.52            |
| A_68_P24536429 | chr6:71391138-71391182                            | NM_024288:-529    | Rmnd5a        | PROMOTER               | 0.151                                                        | 0.542                          | 1918.14            | 1039.65            | 0.082                          | 1435.06            | 117.56             |
| A_68_P23576461 | chr5:31397375-31397419                            | NM_011773:-1496   | Slc30a3       | PROMOTER               | 0.151                                                        | 0.674                          | 1658.04            | 1117.04            | 0.102                          | 1144.17            | 116.34             |
| A_68_P30496206 | chr15:101966579-101966623                         | NM_001033277:46   | Spryd3        | INSIDE                 | 0.151                                                        | 0.345                          | 2743.26            | 945.31             | 0.052                          | 2330.38            | 121.35             |
| A_68_P28567141 | chr12:80108301-80108345                           | NM_178745:-58     | Tmem229b      | PROMOTER               | 0.151                                                        | 0.376                          | 2864.45            | 1077.51            | 0.057                          | 2224.36            | 126.66             |
| A_68_P21106327 | chr2:30837787-30837831                            | NM_028846:10      | Usp20         | INSIDE                 | 0.151                                                        | 0.628                          | 1694.49            | 1063.48            | 0.095                          | 1276.90            | 120.83             |
| A_68_P26805303 | chr9:106724052-106724097                          | NM_001015507:-232 | Vprbp         | PROMOTER               | 0.151                                                        | 0.630                          | 1992.32            | 1254.31            | 0.095                          | 1611.18            | 153.39             |
| A_68_P27899782 | chr11:70068529-70068574                           | NM_007440:292     | Alox12        | INSIDE                 | 0.150                                                        | 0.677                          | 1773.54            | 1200.29            | 0.101                          | 1165.93            | 118.12             |
| A_68_P20509928 | chr1:108610270-108610327                          | NM_009741:569     | Bel2          | INSIDE                 | 0.150                                                        | 0.622                          | 1578.73            | 981.39             | 0.093                          | 1230.71            | 115.06             |
| A_68_P21617375 | chr2:127952895-127952939                          | NM_009754:1143    | Bel2l11       | INSIDE                 | 0.150                                                        | 0.717                          | 2033.76            | 1458.34            | 0.107                          | 1685.58            | 181.05             |
| A_68_P25948520 | chr8:72411249-72411293                            | NM_026818:21      | Cilp2         | INSIDE                 | 0.150                                                        | 0.690                          | 2370.82            | 1636.94            | 0.104                          | 1680.64            | 174.26             |
| A_68_P31157713 | chr17:35257880-35257924                           | NM_009975:490     | Csnk2b        | INSIDE                 | 0.150                                                        | 0.559                          | 2161.91            | 1208.66            | 0.084                          | 1703.06            | 142.82             |
| A_68_P29480508 | chr14:26746521-26746565                           | NM_025311:194     | D14Erd449c    | INSIDE                 | 0.150                                                        | 0.537                          | 5034.47            | 2705.84            | 0.080                          | 4056.60            | 326.20             |
| A_68_P21317255 | chr2:70893877-70893924                            | NM_001165982:100  | Deaf17        | INSIDE                 | 0.150                                                        | 0.661                          | 1606.01            | 1062.03            | 0.099                          | 1230.69            | 121.85             |
| A_68_P23379974 | chr4:144482718-144482768                          | NM_011303:-297    | Dhrs3         | PROMOTER               | 0.150                                                        | 1.494                          | 2470.32            | 3689.51            | 0.224                          | 1584.09            | 355.10             |
| A_68_P31615540 | chr18:35091234-35091284                           | NM_144866:399     | Etf1          | INSIDE                 | 0.150                                                        | 0.657                          | 1663.12            | 1092.97            | 0.098                          | 1185.57            | 116.58             |
| A_68_P31615546 | chr18:35092064-35092109                           | NM_144866:429     | Etf1          | PROMOTER               | 0.150                                                        | 0.482                          | 2393.05            | 1153.68            | 0.072                          | 1700.61            | 122.64             |
| A_68_P28888196 | chr13:24730767-24730811                           | NM_001080381:272  | Fam65b        | INSIDE                 | 0.150                                                        | 0.540                          | 1737.10            | 937.18             | 0.081                          | 1443.13            | 117.13             |
| A_68_P29631506 | chr14:58695032-58695076                           | NM_013518:3532    | Fgf9          | INSIDE                 | 0.150                                                        | 0.698                          | 2848.64            | 1988.57            | 0.105                          | 2150.26            | 225.35             |
| A_68_P29386052 | chr14:8651174-8651222                             | NM_134080:728     | Flnb          | INSIDE                 | 0.150                                                        | 0.545                          | 2078.34            | 1133.72            | 0.082                          | 1452.92            | 118.54             |
| A_68_P32454737 | chrX:68917956-68918000                            | NM_010340:1037    | Gpr50         | INSIDE                 | 0.150                                                        | 1.914                          | 3135.75            | 6003.36            | 0.288                          | 1138.91            | 328.04             |
| A_68_P24816729 | chr6:124690602-124690649                          | NM_013535:472     | Grec10        | INSIDE                 | 0.150                                                        | 0.716                          | 1744.89            | 1249.61            | 0.107                          | 1212.94            | 130.21             |
| A_68_P28044102 | chr11:96227285-96227329                           | NM_008266:235     | Hoxb1         | INSIDE                 | 0.150                                                        | 0.716                          | 3630.03            | 2599.93            | 0.108                          | 2369.35            | 255.08             |
| A_68_P28225275 | chr12:8928468-8928512                             | NM_008640:378     | Laptn4a       | INSIDE                 | 0.150                                                        | 0.633                          | 2476.22            | 1568.69            | 0.095                          | 1910.40            | 182.00             |
| A_68_P26805729 | chr9:106793805-106793862                          | NM_029103:436     | Manf          | INSIDE                 | 0.150                                                        | 0.695                          | 1621.48            | 1126.14            | 0.104                          | 1165.93            | 121.60             |
| A_68_P30558909 | chr16:13780665-13780710                           | NM_001039521:-104 | Rm3           | PROMOTER               | 0.150                                                        | 0.610                          | 1611.25            | 982.63             | 0.092                          | 1332.71            | 122.28             |
| A_68_P26344892 | chr9:20780634-20780678                            | NM_010333:581     | S1pr2         | INSIDE                 | 0.150                                                        | 0.721                          | 2810.39            | 2025.90            | 0.108                          | 2201.03            | 237.29             |
| A_68_P23594807 | chr5:34868707-34868751                            | NM_011893:296     | Sh3bp2        | INSIDE                 | 0.150                                                        | 2.222                          | 4823.82            | 10720.52           | 0.333                          | 3204.04            | 1067.04            |
| A_68_P21836027 | chr2:167363971-167364015                          | NM_011427:266     | Snai1         | INSIDE                 | 0.150                                                        | 0.528                          | 2122.27            | 1120.19            | 0.079                          | 1607.15            | 127.17             |
| A_68_P23590346 | chr5:34000962-34001006                            | NM_001040435:189  | Tacc3         | INSIDE                 | 0.150                                                        | 0.562                          | 2048.93            | 1151.90            | 0.085                          | 1386.66            | 117.30             |
| A_68_P31152610 | chr17:34324622-34324668                           | NM_001161730:144  | Tap1          | INSIDE                 | 0.150                                                        | 0.577                          | 2120.30            | 1223.20            | 0.086                          | 1547.66            | 133.51             |
| A_68_P24541278 | chr6:72305613-72305657                            | NM_144916:158     | Tmem150a      | INSIDE                 | 0.150                                                        | 0.711                          | 4004.53            | 2846.26            | 0.107                          | 2735.04            | 292.03             |
| A_68_P25034259 | chr7:31742709-31742753                            | NM_011680:-908    | Usf2          | PROMOTER               | 0.150                                                        | 0.626                          | 1646.18            | 1029.94            | 0.094                          | 1299.90            | 121.88             |
| A_68_P27644761 | chr11:23155625-23155669                           | NM_001035226:-394 | Xpo1          | PROMOTER               | 0.150                                                        | 0.428                          | 2430.62            | 1040.22            | 0.064                          | 1822.87            | 116.67             |
| A_68_P30787361 | chr16:57606603-57606647                           | NM_025599:356     | 2610528E23Rik | INSIDE                 | 0.149                                                        | 0.558                          | 1787.63            | 997.60             | 0.083                          | 1398.14            | 116.59             |
| A_68_P22921610 | chr4:53173018-53173062                            | NM_013454:-273    | Abca1         | PROMOTER               | 0.149                                                        | 0.597                          | 1907.07            | 1138.50            | 0.089                          | 1345.39            | 119.70             |

| ProbeName      | Target position of probe on CpG island microarray | TargetID                | GeneSymbol    | CpG island Description | Ratio of relative methylation (TiO <sub>2</sub> -NP/Vehicle) | Sham group                     |                    |                    | TiO <sub>2</sub> -H group      |                    |                    |
|----------------|---------------------------------------------------|-------------------------|---------------|------------------------|--------------------------------------------------------------|--------------------------------|--------------------|--------------------|--------------------------------|--------------------|--------------------|
|                |                                                   |                         |               |                        |                                                              | Relative methylation (Cy5/Cy3) | Cy3 signal (Input) | Cy5 signal (MeDIP) | Relative methylation (Cy5/Cy3) | Cy3 signal (Input) | Cy5 signal (MeDIP) |
| A_68_P21334155 | chr2:73729976-73730020                            | NM_001025093:687        | Atf2          | INSIDE                 | 0.149                                                        | 1.442                          | 3688.30            | 5319.20            | 0.216                          | 2553.75            | 550.51             |
| A_68_P27371449 | chr10:96079420-96079468                           | NM_007569:-190          | Btg1          | PROMOTER               | 0.149                                                        | 1.915                          | 3073.84            | 5887.06            | 0.286                          | 2093.55            | 598.18             |
| A_68_P22058853 | chr3:36470390-36470434                            | NM_009828:506           | Cena2         | INSIDE                 | 0.149                                                        | 0.518                          | 3345.40            | 1733.49            | 0.077                          | 2152.20            | 166.69             |
| A_68_P24593884 | chr6:83447860-83447916                            | NM_001162521:9075       | Dguok         | INSIDE                 | 0.149                                                        | 1.778                          | 555.57             | 987.75             | 0.264                          | 445.81             | 117.71             |
| A_68_P31561531 | chr18:24868543-24868587                           | NM_175276:619           | Fhod3         | INSIDE                 | 0.149                                                        | 0.620                          | 1660.31            | 1029.07            | 0.092                          | 1352.22            | 125.06             |
| A_68_P20332288 | chr1:71699744-71699788                            | NM_010233:-21           | Fn1           | PROMOTER               | 0.149                                                        | 0.581                          | 1889.71            | 1097.16            | 0.086                          | 1357.67            | 117.40             |
| A_68_P23281392 | chr4:126354680-126354732                          | NM_011970:-180          | Psmb2         | PROMOTER               | 0.149                                                        | 0.548                          | 1907.60            | 1045.23            | 0.081                          | 1430.29            | 116.46             |
| A_68_P21762356 | chr2:154616308-154616364                          | NM_001139511:-509       | Raly          | PROMOTER               | 0.149                                                        | 0.574                          | 2066.36            | 1187.01            | 0.086                          | 1455.79            | 124.90             |
| A_68_P21817622 | chr2:164226486-164226530                          | NM_009036:-2185         | Rbpjl         | PROMOTER               | 0.149                                                        | 0.562                          | 2891.71            | 1624.92            | 0.084                          | 2178.00            | 182.49             |
| A_68_P24946916 | chr7:3655703-3655755                              | NM_029767:86            | Rps9          | INSIDE                 | 0.149                                                        | 0.670                          | 1740.31            | 1165.76            | 0.100                          | 1222.34            | 121.70             |
| A_68_P31106580 | chr17:25969693-25969737                           | NM_019719:592           | Stub1         | INSIDE                 | 0.149                                                        | 0.531                          | 2140.17            | 1135.90            | 0.079                          | 1526.64            | 120.86             |
| A_68_P32290626 | chrX:20497844-20497888                            | NM_001110780:178        | Syn1          | INSIDE                 | 0.149                                                        | 1.424                          | 1314.25            | 1871.98            | 0.213                          | 567.33             | 120.62             |
| A_68_P20634931 | chr1:136605584-136605628                          | NM_009307:62349         | Syt2          | INSIDE                 | 0.149                                                        | 0.569                          | 1850.55            | 1053.27            | 0.085                          | 1400.73            | 118.94             |
| A_68_P22894259 | chr4:47365606-47365650                            | NM_009370:-548          | Tgfbr1        | PROMOTER               | 0.149                                                        | 1.682                          | 4487.99            | 7547.65            | 0.251                          | 2946.64            | 740.06             |
| A_68_P32698230 | chrX:136813127-136813171                          | ENSMUST00000130153:-747 |               | PROMOTER               | 0.149                                                        | 2.343                          | 2789.44            | 6536.57            | 0.350                          | 1056.91            | 370.03             |
| A_68_P31022859 | chr17:7032261-7032308                             | ENSMUST00000165850:55   |               | INSIDE                 | 0.149                                                        | 0.623                          | 1744.26            | 1087.44            | 0.093                          | 1230.42            | 114.61             |
| A_68_P27977999 | chr1:84339401-84339452                            | NR_038057:265           | 1500016L03Rik | INSIDE                 | 0.148                                                        | 0.520                          | 2271.78            | 1180.29            | 0.077                          | 1698.36            | 130.30             |
| A_68_P20997499 | chr2:9804639-9804695                              | NR_024257:1794          | 4930412O13Rik | INSIDE                 | 0.148                                                        | 0.705                          | 1524.16            | 1075.11            | 0.104                          | 1142.43            | 119.23             |
| A_68_P23262156 | chr4:123019628-123019672                          | NM_007558:396           | Bmp8a         | INSIDE                 | 0.148                                                        | 0.694                          | 2120.32            | 1471.63            | 0.103                          | 1521.93            | 156.18             |
| A_68_P20561488 | chr1:122239104-122239151                          | NM_207233:1969          | C1ql2         | INSIDE                 | 0.148                                                        | 0.537                          | 2023.78            | 1086.08            | 0.080                          | 1559.66            | 124.08             |
| A_68_P32337351 | chrX:38754697-38754743                            | NM_016886:240           | Gria3         | INSIDE                 | 0.148                                                        | 1.590                          | 1415.23            | 2249.72            | 0.236                          | 503.64             | 118.83             |
| A_68_P28042988 | chr11:96064572-96064616                           | NM_008267:8920          | Hoxb13        | DOWNSTREAM             | 0.148                                                        | 0.673                          | 2519.76            | 1696.56            | 0.100                          | 1915.09            | 190.66             |
| A_68_P23658787 | chr5:46247794-46247838                            | NM_172153:-25           | Lcorl         | PROMOTER               | 0.148                                                        | 0.525                          | 4074.36            | 2140.18            | 0.078                          | 2739.42            | 213.26             |
| A_68_P26344986 | chr9:20807641-20807685                            | NM_023167:482           | Mrp14         | INSIDE                 | 0.148                                                        | 0.579                          | 2912.47            | 1686.79            | 0.086                          | 2153.49            | 184.72             |
| A_68_P26460524 | chr9:43048046-43048090                            | NM_178644:-169          | Oaf           | PROMOTER               | 0.148                                                        | 0.597                          | 2265.97            | 1352.33            | 0.088                          | 1894.99            | 167.05             |
| A_68_P23360936 | chr4:140462092-140462151                          | NM_008812:-153          | Padi2         | PROMOTER               | 0.148                                                        | 1.833                          | 508.54             | 932.20             | 0.270                          | 430.89             | 116.52             |
| A_68_P31154934 | chr17:34767881-34767925                           | NM_030890:1272          | Prrt1         | INSIDE                 | 0.148                                                        | 0.432                          | 5022.36            | 2168.37            | 0.064                          | 3732.73            | 239.24             |
| A_68_P30128578 | chr15:34373065-34373109                           | NM_001163485:-55        | Rpl30         | DIVERGENT_PROMOTER     | 0.148                                                        | 0.543                          | 1890.07            | 1027.02            | 0.081                          | 1500.12            | 121.03             |
| A_68_P28291149 | chr12:25393568-25393620                           | NM_009104:476           | Rrm2          | INSIDE                 | 0.148                                                        | 0.719                          | 1770.14            | 1272.33            | 0.106                          | 1182.39            | 125.76             |
| A_68_P24657050 | chr6:94450275-94450319                            | NM_026255:-11           | Sle2sa26      | PROMOTER               | 0.148                                                        | 0.659                          | 1733.51            | 1141.55            | 0.098                          | 1259.85            | 123.03             |
| A_68_P28100612 | chr11:106134531-106134575                         | NM_001130187:-266       | Smad2         | DIVERGENT_PROMOTER     | 0.148                                                        | 0.717                          | 2817.48            | 2019.75            | 0.106                          | 1950.45            | 206.37             |
| A_68_P23591879 | chr5:34279139-34279183                            | NM_011914:-253          | Whse2         | PROMOTER               | 0.148                                                        | 0.534                          | 2089.38            | 1115.94            | 0.079                          | 1486.76            | 117.47             |
| A_68_P22262791 | chr3:79090407-79090451                            | AK032506:-885           |               | PROMOTER               | 0.148                                                        | 0.621                          | 3721.53            | 2309.28            | 0.092                          | 2446.44            | 224.50             |
| A_68_P26568903 | chr9:61970644-61970688                            | nmu-mir-5133:-265       |               | PROMOTER               | 0.148                                                        | 0.511                          | 1924.06            | 982.76             | 0.076                          | 1698.19            | 128.32             |
| A_68_P26237598 | chr8:125565114-125565166                          | NM_001081379:1044       | Ankrd11       | INSIDE                 | 0.147                                                        | 1.414                          | 991.73             | 1401.99            | 0.208                          | 769.56             | 160.26             |
| A_68_P25007188 | chr7:25689481-25689525                            | NM_001130152:138        | Arhgef1       | INSIDE                 | 0.147                                                        | 0.653                          | 1911.53            | 1247.54            | 0.096                          | 1358.90            | 130.04             |
| A_68_P25657170 | chr8:11727542-11727589                            | NM_001113517:-539       | Arhgef7       | PROMOTER               | 0.147                                                        | 0.519                          | 2257.04            | 1170.55            | 0.076                          | 1612.50            | 123.06             |
| A_68_P24511775 | chr6:65331286-65331330                            | NM_175524:21            | C130060K24Rik | INSIDE                 | 0.147                                                        | 0.530                          | 2081.02            | 1102.85            | 0.078                          | 1554.64            | 120.73             |
| A_68_P27533816 | chr10:126500794-126500838                         | NM_009870:158           | Cdk4          | INSIDE                 | 0.147                                                        | 0.642                          | 1855.86            | 1191.82            | 0.095                          | 1239.12            | 117.31             |
| A_68_P31791362 | chr18:67503417-67503461                           | NM_007702:221           | Cidea         | INSIDE                 | 0.147                                                        | 0.750                          | 6607.30            | 4956.51            | 0.111                          | 4295.64            | 475.23             |
| A_68_P22411201 | chr3:108003559-108003603                          | NM_001081320:172        | Cyb561d1      | INSIDE                 | 0.147                                                        | 0.723                          | 2406.39            | 1739.12            | 0.106                          | 1685.36            | 179.31             |
| A_68_P30347865 | chr15:76200037-76200087                           | NM_021555:735           | Fam203a       | INSIDE                 | 0.147                                                        | 1.388                          | 1576.99            | 2189.31            | 0.203                          | 1228.77            | 250.05             |
| A_68_P24589809 | chr6:82724860-82724912                            | NM_013820:-438          | Hk2           | PROMOTER               | 0.147                                                        | 0.594                          | 1934.19            | 1149.04            | 0.087                          | 1311.08            | 114.30             |
| A_68_P25114497 | chr7:57014275-57014319                            | NM_001146049:-179       | Htatip2       | PROMOTER               | 0.147                                                        | 0.632                          | 1827.68            | 1155.55            | 0.093                          | 1317.74            | 122.80             |
| A_68_P20296826 | chr1:65225580-65225625                            | NM_010497:114           | Idh1          | INSIDE                 | 0.147                                                        | 0.530                          | 2027.47            | 1073.80            | 0.078                          | 1536.58            | 119.71             |
| A_68_P27805842 | chr11:53449954-53449998                           | NM_008355:-1772         | Il13          | PROMOTER               | 0.147                                                        | 0.532                          | 2695.44            | 1433.25            | 0.078                          | 1983.97            | 155.09             |
| A_68_P29134809 | chr13:72766875-72766919                           | NM_010574:471           | Irx2          | INSIDE                 | 0.147                                                        | 0.486                          | 2334.06            | 1134.35            | 0.071                          | 1873.96            | 133.64             |
| A_68_P30482198 | chr15:99602344-99602388                           | NM_028015:580           | Lass5         | INSIDE                 | 0.147                                                        | 0.660                          | 1573.99            | 1039.52            | 0.097                          | 1216.34            | 118.16             |
| A_68_P20025044 | chr1:9958133-9958177                              | NM_145692:41047         | Lrcc67        | DOWNSTREAM             | 0.147                                                        | 0.458                          | 2357.32            | 1079.34            | 0.067                          | 1700.36            | 114.20             |
| A_68_P24137624 | chr5:140267260-140267304                          | NM_010757:-207          | Mafk          | PROMOTER               | 0.147                                                        | 0.617                          | 1768.63            | 1091.14            | 0.091                          | 1360.91            | 123.35             |
| A_68_P24424405 | chr6:47763384-47763429                            | NR_030485:-9755         | Mir704        | PROMOTER               | 0.147                                                        | 0.427                          | 2688.43            | 1148.66            | 0.063                          | 1981.75            | 124.42             |

| ProbeName      | Target position of probe on CpG island microarray | TargetID                 | GeneSymbol    | CpG island Description | Ratio of relative methylation (TiO <sub>2</sub> -NP/Vehicle) | Sham group                     |                    |                    | TiO <sub>2</sub> -H group      |                    |                    |
|----------------|---------------------------------------------------|--------------------------|---------------|------------------------|--------------------------------------------------------------|--------------------------------|--------------------|--------------------|--------------------------------|--------------------|--------------------|
|                |                                                   |                          |               |                        |                                                              | Relative methylation (Cy5/Cy3) | Cy3 signal (Input) | Cy5 signal (MeDIP) | Relative methylation (Cy5/Cy3) | Cy3 signal (Input) | Cy5 signal (MeDIP) |
| A_68_P29773654 | chr14:84846918-84846962                           | NM_001013753:3571        | Pcdh17        | INSIDE                 | 0.147                                                        | 0.570                          | 3206.13            | 1827.43            | 0.084                          | 2164.94            | 180.99             |
| A_68_P26629702 | chr9:72654701-72654745                            | NM_175485:-358           | Prtg          | PROMOTER               | 0.147                                                        | 0.718                          | 4221.62            | 3030.89            | 0.106                          | 3133.78            | 330.92             |
| A_68_P28534661 | chr12:74040784-74040828                           | NM_011384:-125           | Six6          | PROMOTER               | 0.147                                                        | 0.603                          | 2438.40            | 1471.16            | 0.089                          | 1838.01            | 163.19             |
| A_68_P32036086 | chr19:26681225-26681269                           | NM_011416:1597           | Smarca2       | INSIDE                 | 0.147                                                        | 0.496                          | 2365.78            | 1174.36            | 0.073                          | 1580.24            | 115.13             |
| A_68_P31924554 | chr19:4712508-4712552                             | NM_021287:1308           | Spnb3         | INSIDE                 | 0.147                                                        | 0.633                          | 2518.67            | 1593.51            | 0.093                          | 1762.68            | 164.01             |
| A_68_P22538544 | chr3:132347238-132347282                          | NM_173032:153            | Tbck          | INSIDE                 | 0.147                                                        | 0.539                          | 1856.66            | 1000.80            | 0.079                          | 1473.03            | 116.98             |
| A_68_P26785090 | chr9:103207295-103207339                          | NM_176979:-340           | Topbp1        | PROMOTER               | 0.147                                                        | 0.388                          | 2743.91            | 1064.70            | 0.057                          | 2150.14            | 122.56             |
| A_68_P24648067 | chr6:92893117-92893161                            | NR_015530:2563           | 9530026P05Rik | INSIDE                 | 0.146                                                        | 0.552                          | 2239.11            | 1235.64            | 0.081                          | 1714.78            | 138.49             |
| A_68_P32582138 | chrX:103124420-103124464                          | NM_009530:269            | Atrx          | INSIDE                 | 0.146                                                        | 1.403                          | 1563.93            | 2193.88            | 0.204                          | 737.55             | 150.59             |
| A_68_P31746205 | chr18:59335935-59335979                           | NM_001081328:963         | Chsy3         | INSIDE                 | 0.146                                                        | 0.590                          | 2367.87            | 1397.88            | 0.086                          | 1681.82            | 144.95             |
| A_68_P32094201 | chr19:37249291-37249335                           | NM_198300:32471          | Cpeb3         | INSIDE                 | 0.146                                                        | 0.533                          | 4915.16            | 2618.02            | 0.078                          | 4221.46            | 328.25             |
| A_68_P21489860 | chr2:104430467-104430511                          | NM_001037326:-152        | Catf3         | PROMOTER               | 0.146                                                        | 0.705                          | 2994.71            | 2109.85            | 0.103                          | 2084.39            | 214.56             |
| A_68_P30156153 | chr15:39688931-39688978                           | NM_022722:62             | Dpys          | INSIDE                 | 0.146                                                        | 0.705                          | 1631.29            | 1149.86            | 0.103                          | 1188.32            | 122.11             |
| A_68_P28614433 | chr12:88488594-88488639                           | NM_010363:-51            | Gstz1         | PROMOTER               | 0.146                                                        | 0.613                          | 1975.54            | 1211.73            | 0.089                          | 1383.70            | 123.75             |
| A_68_P28961838 | chr13:38726587-38726631                           | NM_139063:370            | Muted         | INSIDE                 | 0.146                                                        | 0.650                          | 1652.99            | 1074.70            | 0.095                          | 1293.75            | 122.85             |
| A_68_P24176163 | chr5:148672587-148672634                          | NM_025624:407            | Pomp          | INSIDE                 | 0.146                                                        | 0.529                          | 2026.06            | 1071.92            | 0.077                          | 1571.59            | 121.26             |
| A_68_P25435184 | chr7:121419570-121419614                          | NM_011965:38             | Psmal1        | INSIDE                 | 0.146                                                        | 0.703                          | 1512.13            | 1063.11            | 0.103                          | 1137.00            | 116.81             |
| A_68_P28540842 | chr12:75065446-75065490                           | NM_178392:-48            | Snapc1        | PROMOTER               | 0.146                                                        | 0.520                          | 2184.93            | 1136.69            | 0.076                          | 1599.66            | 121.17             |
| A_68_P32239402 | chrX:7215889-7215933                              | NM_009305:205            | Syp           | INSIDE                 | 0.146                                                        | 2.741                          | 2039.56            | 5590.66            | 0.400                          | 797.29             | 319.04             |
| A_68_P24018824 | chr5:117569883-117569927                          | NM_001199685:-233        | Taok3         | DIVERGENT_PROMOTER     | 0.146                                                        | 0.565                          | 1899.34            | 1073.81            | 0.083                          | 1433.26            | 118.63             |
| A_68_P20555798 | chr1:121086183-121086227                          |                          |               | Unknown                | 0.146                                                        | 0.713                          | 1997.86            | 1424.83            | 0.104                          | 1621.69            | 168.71             |
| A_68_P23962030 | chr5:106990411-106990455                          | ENSMUST00000131029:13302 |               | INSIDE                 | 0.146                                                        | 0.467                          | 2489.24            | 1162.31            | 0.068                          | 1922.58            | 130.64             |
| A_68_P24138293 | chr5:140389088-140389132                          | NM_175522:5214           | Elfn1         | INSIDE                 | 0.145                                                        | 0.524                          | 2335.48            | 1223.21            | 0.076                          | 1655.78            | 126.15             |
| A_68_P25835354 | chr8:47380103-47380147                            | NM_173789:-99            | Helt          | PROMOTER               | 0.145                                                        | 0.659                          | 1657.80            | 1092.20            | 0.095                          | 1306.90            | 124.55             |
| A_68_P22325452 | chr3:90280402-90280446                            | NM_026374:302            | Ilf2          | INSIDE                 | 0.145                                                        | 0.691                          | 1734.83            | 1198.46            | 0.100                          | 1432.82            | 143.04             |
| A_68_P24921912 | chr6:145197978-145198027                          | NM_021284:749            | Kras          | INSIDE                 | 0.145                                                        | 0.721                          | 2164.39            | 1561.55            | 0.105                          | 1620.53            | 169.47             |
| A_68_P22872798 | chr4:43644462-43644506                            | NM_173788:-322           | Npr2          | PROMOTER               | 0.145                                                        | 0.685                          | 3693.85            | 2530.88            | 0.099                          | 2601.01            | 258.44             |
| A_68_P27279289 | chr10:79317369-79317415                           | NM_001077363:43          | Ptpb1         | INSIDE                 | 0.145                                                        | 0.643                          | 3440.87            | 2213.88            | 0.093                          | 2369.15            | 221.00             |
| A_68_P22450166 | chr3:116298284-116298328                          | NM_028349:381            | Sass6         | INSIDE                 | 0.145                                                        | 0.590                          | 1968.04            | 1161.25            | 0.085                          | 1393.24            | 119.11             |
| A_68_P26587801 | chr9:65309057-65309101                            | NM_138584:335            | Spq21         | INSIDE                 | 0.145                                                        | 0.610                          | 3316.04            | 2023.07            | 0.089                          | 2586.25            | 229.16             |
| A_68_P31096038 | chr17:24342160-24342204                           | NM_001163847:325         | Tbc1d24       | INSIDE                 | 0.145                                                        | 1.358                          | 5357.45            | 7277.47            | 0.197                          | 3351.03            | 659.28             |
| A_68_P24838521 | chr6:128305667-128305711                          | NM_011657:181            | Tulp3         | INSIDE                 | 0.145                                                        | 0.746                          | 6524.39            | 4868.60            | 0.108                          | 4634.17            | 501.95             |
| A_68_P31962498 | chr19:12870780-12870828                           | NR_024093:-191           | U05342        | DIVERGENT_PROMOTER     | 0.145                                                        | 0.672                          | 1627.79            | 1093.84            | 0.098                          | 1213.82            | 118.51             |
| A_68_P32975184 | chr9:108393603-108393647                          | NM_027804:618            | Usp19         | INSIDE                 | 0.145                                                        | 0.448                          | 2553.08            | 1142.68            | 0.065                          | 1982.21            | 128.47             |
| A_68_P27241483 | chr10:72117792-72117836                           | NM_025635:172            | Zwint         | INSIDE                 | 0.145                                                        | 0.593                          | 1715.60            | 1017.51            | 0.086                          | 1370.75            | 117.82             |
| A_68_P25841612 | chr8:48498559-48498603                            | ENSMUST00000074466:98    |               | INSIDE                 | 0.145                                                        | 0.642                          | 1654.14            | 1062.14            | 0.093                          | 1437.72            | 133.73             |
| A_68_P24819099 | chr6:125114766-125114820                          | NM_008084:809            | Gapdh         | INSIDE                 | 0.144                                                        | 0.713                          | 1595.12            | 1137.65            | 0.103                          | 1135.74            | 116.87             |
| A_68_P31603481 | chr18:32719632-32719687                           | NM_001048207:29          | Gype          | INSIDE                 | 0.144                                                        | 0.652                          | 1678.83            | 1095.19            | 0.094                          | 1275.87            | 119.70             |
| A_68_P25954141 | chr8:73321121-73321165                            | NM_199308:-4810          | Mast3         | PROMOTER               | 0.144                                                        | 2.216                          | 3856.19            | 8546.18            | 0.320                          | 2589.98            | 828.89             |
| A_68_P27281294 | chr10:79612495-79612539                           | NM_021565:1482           | Midn          | INSIDE                 | 0.144                                                        | 0.575                          | 3449.71            | 1982.84            | 0.083                          | 2534.98            | 209.94             |
| A_68_P26011762 | chr8:85387432-85387476                            | NM_177378:200            | Rnf150        | INSIDE                 | 0.144                                                        | 0.373                          | 2953.75            | 1100.78            | 0.054                          | 2359.11            | 126.34             |
| A_68_P30546793 | chr16:11203333-11203377                           | NM_025546:31             | Rsl1d1        | INSIDE                 | 0.144                                                        | 0.673                          | 1570.09            | 1056.73            | 0.097                          | 1216.18            | 118.06             |
| A_68_P22412729 | chr3:108247976-108248020                          | NM_001204979:179         | Sars          | INSIDE                 | 0.144                                                        | 0.620                          | 1784.22            | 1106.24            | 0.089                          | 1331.89            | 119.05             |
| A_68_P28535265 | chr12:74146791-74146835                           | NM_009189:887            | Six1          | INSIDE                 | 0.144                                                        | 0.419                          | 2479.21            | 1037.84            | 0.060                          | 2086.28            | 125.71             |
| A_68_P21783955 | chr2:158439931-158439975                          | NM_009508:3459           | Slc32a1       | INSIDE                 | 0.144                                                        | 0.708                          | 1510.80            | 1068.98            | 0.102                          | 1160.61            | 118.27             |
| A_68_P28581895 | chr12:82732734-82732780                           | NM_001033149:401         | Tie9          | INSIDE                 | 0.144                                                        | 0.544                          | 2004.45            | 1091.41            | 0.078                          | 1490.13            | 116.75             |
| A_68_P30422257 | chr15:88785384-88785428                           | NM_172818:-558           | Tul8          | PROMOTER               | 0.144                                                        | 0.634                          | 1698.15            | 1077.19            | 0.091                          | 1346.29            | 122.97             |
| A_68_P24973049 | chr7:13388821-13388865                            | NM_026046:15367          | Zfp329        | DOWNSTREAM             | 0.144                                                        | 0.674                          | 1664.69            | 1121.87            | 0.097                          | 1183.86            | 114.95             |
| A_68_P29455892 | chr14:22807139-22807185                           | NM_145459:1661           | Zfp503        | INSIDE                 | 0.144                                                        | 0.636                          | 1611.16            | 1024.55            | 0.092                          | 1288.71            | 118.05             |
| A_68_P26710355 | A_68_P26710355                                    |                          |               | Unknown                | 0.144                                                        | 0.715                          | 5807.06            | 4152.40            | 0.103                          | 4214.33            | 433.26             |
| A_68_P20026598 | chr1:10222127-10222186                            | NM_001102430:595         | Arfgef1       | INSIDE                 | 0.143                                                        | 1.528                          | 1118.22            | 1708.68            | 0.218                          | 795.12             | 173.60             |

| ProbeName      | Target position of probe on CpG island microarray | TargetID          | GeneSymbol    | CpG island Description | Ratio of relative methylation (TiO <sub>2</sub> -NP/Vehicle) | Sham group                     |                    |                    | TiO <sub>2</sub> -H group      |                    |                    |
|----------------|---------------------------------------------------|-------------------|---------------|------------------------|--------------------------------------------------------------|--------------------------------|--------------------|--------------------|--------------------------------|--------------------|--------------------|
|                |                                                   |                   |               |                        |                                                              | Relative methylation (Cy5/Cy3) | Cy3 signal (Input) | Cy5 signal (MeDIP) | Relative methylation (Cy5/Cy3) | Cy3 signal (Input) | Cy5 signal (MeDIP) |
| A_68_P30371086 | chr15:80085860-80085904                           | NM_009716:269     | Atf4          | INSIDE                 | 0.143                                                        | 0.739                          | 6418.96            | 4741.92            | 0.106                          | 4567.50            | 482.91             |
| A_68_P31458881 | chr18:3508571-3508630                             | NM_026505:646     | Bambi         | INSIDE                 | 0.143                                                        | 0.715                          | 1410.05            | 1008.83            | 0.102                          | 1201.39            | 122.95             |
| A_68_P25093841 | chr7:52825908-52825952                            | NM_009737:198     | Beat2         | INSIDE                 | 0.143                                                        | 0.524                          | 2014.69            | 1054.89            | 0.075                          | 1611.22            | 120.81             |
| A_68_P23362368 | chr4:140695411-140695455                          | NM_001025608:279  | D4Ert422c     | INSIDE                 | 0.143                                                        | 0.680                          | 1498.73            | 1019.43            | 0.097                          | 1202.61            | 117.16             |
| A_68_P32553698 | chrX:96331493-96331537                            | NM_010110:46      | Efnb1         | INSIDE                 | 0.143                                                        | 1.438                          | 1503.49            | 2161.96            | 0.206                          | 785.68             | 161.92             |
| A_68_P21771130 | chr2:156247152-156247196                          | NM_001003815:387  | Epb4.111      | INSIDE                 | 0.143                                                        | 1.853                          | 2136.61            | 3959.67            | 0.264                          | 1540.17            | 407.01             |
| A_68_P23301441 | chr4:129985717-129985761                          | NM_010174:-283    | Fabp3         | PROMOTER               | 0.143                                                        | 2.006                          | 3897.41            | 7818.90            | 0.286                          | 2360.07            | 675.17             |
| A_68_P28419951 | chr12:50484189-50484235                           | NM_008241:219     | Foxg1         | INSIDE                 | 0.143                                                        | 0.663                          | 1701.63            | 1128.29            | 0.095                          | 1264.70            | 119.59             |
| A_68_P22311351 | chr3:87826838-87826882                            | NM_022031:4573    | Hapln2        | INSIDE                 | 0.143                                                        | 0.622                          | 5199.28            | 3233.76            | 0.089                          | 3528.41            | 314.89             |
| A_68_P20826869 | chr1:173177373-173177425                          | NM_153064:-155    | Ndufs2        | DIVERGENT_PROMOTER     | 0.143                                                        | 0.695                          | 1648.83            | 1145.93            | 0.099                          | 1175.65            | 116.93             |
| A_68_P25514699 | chr7:136400655-136400699                          | NM_001080963:69   | Ppapdc1a      | INSIDE                 | 0.143                                                        | 0.548                          | 1757.12            | 963.73             | 0.079                          | 1485.47            | 116.63             |
| A_68_P32066438 | chr19:31838454-31838498                           | NM_001013833:1047 | Prkg1         | INSIDE                 | 0.143                                                        | 0.715                          | 1475.93            | 1054.89            | 0.102                          | 1131.58            | 115.42             |
| A_68_P32289248 | chrX:20195553-20195607                            | NM_001167776:696  | Rbm10         | INSIDE                 | 0.143                                                        | 2.026                          | 1692.56            | 3428.57            | 0.291                          | 715.96             | 208.02             |
| A_68_P24061481 | chr5:124927981-124928025                          | NM_030259:242     | Rippl2        | INSIDE                 | 0.143                                                        | 0.696                          | 3170.36            | 2206.78            | 0.100                          | 2288.85            | 227.81             |
| A_68_P20617850 | chr1:133724396-133724440                          | NM_173865:-170    | Slc41a1       | PROMOTER               | 0.143                                                        | 0.648                          | 3597.66            | 2331.67            | 0.093                          | 2661.22            | 247.15             |
| A_68_P25724847 | chr8:26127928-26127972                            | NM_027194:268     | Tm2d2         | INSIDE                 | 0.143                                                        | 0.479                          | 2579.85            | 1236.96            | 0.069                          | 1716.41            | 117.76             |
| A_68_P24136178 | chr5:140022739-140022790                          | NM_013702:2913    | Uncx          | INSIDE                 | 0.143                                                        | 0.547                          | 1889.50            | 1033.10            | 0.078                          | 1509.11            | 118.01             |
| A_68_P22394202 | chr3:104764921-104764965                          | NM_009520:-315    | Wnt2b         | PROMOTER               | 0.143                                                        | 0.703                          | 1711.20            | 1202.13            | 0.101                          | 1180.85            | 118.91             |
| A_68_P21664159 | chr2:136504670-136504714                          |                   |               | Unknown                | 0.143                                                        | 0.660                          | 1850.04            | 1220.98            | 0.095                          | 1452.73            | 137.28             |
| A_68_P26235837 | chr8:125299586-125299630                          | NM_144932:204     | Acsf3         | INSIDE                 | 0.142                                                        | 0.632                          | 1690.76            | 1068.31            | 0.090                          | 1295.99            | 116.19             |
| A_68_P32717148 | chrX:140752921-140752965                          | NM_026247:434     | Alg13         | INSIDE                 | 0.142                                                        | 2.935                          | 7059.89            | 20719.84           | 0.417                          | 2859.28            | 1192.69            |
| A_68_P22069523 | chr3:38383943-38383987                            | NM_001167883:-226 | Ankrd50       | PROMOTER               | 0.142                                                        | 1.541                          | 10968.42           | 16902.02           | 0.218                          | 7499.82            | 1638.58            |
| A_68_P22058854 | chr3:36470470-36470514                            | NM_009828:426     | Cena2         | INSIDE                 | 0.142                                                        | 0.588                          | 5226.28            | 3071.76            | 0.083                          | 3578.10            | 297.82             |
| A_68_P22874798 | chr4:44026078-44026122                            | NM_001080384:586  | Ctla          | INSIDE                 | 0.142                                                        | 0.594                          | 3563.10            | 2116.44            | 0.084                          | 2508.59            | 211.54             |
| A_68_P22128837 | chr3:51081149-51081193                            | NM_023502:48739   | Ehf2          | INSIDE                 | 0.142                                                        | 0.545                          | 2634.44            | 1434.62            | 0.078                          | 2014.56            | 156.16             |
| A_68_P25947454 | chr8:71919340-71919384                            | NR_038043:81      | Gm10033       | INSIDE                 | 0.142                                                        | 0.631                          | 1761.42            | 1111.03            | 0.090                          | 1309.54            | 117.36             |
| A_68_P28882218 | chr13:23654270-23654316                           | NM_178205:-58     | Hist1h3e      | PROMOTER               | 0.142                                                        | 0.579                          | 3050.22            | 1765.67            | 0.082                          | 2142.61            | 175.81             |
| A_68_P26061534 | chr8:94325346-94325390                            | NM_008393:-95     | Irx3          | PROMOTER               | 0.142                                                        | 0.667                          | 3841.50            | 2562.64            | 0.095                          | 2815.88            | 266.28             |
| A_68_P32227001 | chr19:60832863-60832907                           | NM_178421:995     | Nanos1        | INSIDE                 | 0.142                                                        | 0.467                          | 2123.47            | 992.04             | 0.066                          | 1757.05            | 116.56             |
| A_68_P28767700 | chr12:117643877-117643921                         | NM_133762:24      | Ncapg2        | INSIDE                 | 0.142                                                        | 2.324                          | 8194.30            | 19044.50           | 0.330                          | 5306.27            | 1749.19            |
| A_68_P26951409 | chr10:13193710-13193754                           | NM_001195065:470  | Phactr2       | INSIDE                 | 0.142                                                        | 0.516                          | 3272.04            | 1686.83            | 0.073                          | 2460.01            | 179.63             |
| A_68_P32567638 | chrX:99384443-99384487                            | NM_009094:-754    | Rps4x         | PROMOTER               | 0.142                                                        | 1.502                          | 1346.64            | 2022.92            | 0.214                          | 561.33             | 120.06             |
| A_68_P29699882 | chr14:70591597-70591641                           | NM_011366:15826   | Sorbs3        | INSIDE                 | 0.142                                                        | 0.740                          | 4672.18            | 3458.45            | 0.105                          | 3122.61            | 329.25             |
| A_68_P28154079 | chr11:115397941-115397990                         | NM_133354:-421    | Sumo2         | PROMOTER               | 0.142                                                        | 0.550                          | 1981.25            | 1090.26            | 0.078                          | 1531.33            | 119.91             |
| A_68_P28078652 | chr11:102146344-102146398                         | NM_028076:96      | Tmub2         | INSIDE                 | 0.142                                                        | 2.534                          | 2094.28            | 5307.20            | 0.360                          | 1324.01            | 476.80             |
| A_68_P28280597 | chr12:21423661-21423705                           | NM_011739:-385    | Ywhaq         | PROMOTER               | 0.142                                                        | 0.515                          | 2174.82            | 1120.31            | 0.073                          | 1666.47            | 121.62             |
| A_68_P28601430 | chr12:86311556-86311600                           | NM_178065:258     | 1110018G07Rik | INSIDE                 | 0.141                                                        | 0.694                          | 2777.69            | 1926.56            | 0.098                          | 2013.51            | 197.55             |
| A_68_P32365089 | chrX:45866544-45866588                            | NM_012019:37      | Aifm1         | INSIDE                 | 0.141                                                        | 1.937                          | 2558.66            | 4956.93            | 0.273                          | 1047.74            | 285.92             |
| A_68_P32121139 | chr19:42505784-42505828                           | NM_145123:467     | Crtac1        | INSIDE                 | 0.141                                                        | 1.354                          | 4979.47            | 6743.92            | 0.191                          | 3461.59            | 662.13             |
| A_68_P22828286 | chr4:45355486-45355530                            | NM_153167:536     | Deaf10        | INSIDE                 | 0.141                                                        | 0.673                          | 1928.95            | 1298.60            | 0.095                          | 1355.43            | 128.66             |
| A_68_P26167379 | chr8:113782539-113782583                          | NM_009149:542     | Glg1          | INSIDE                 | 0.141                                                        | 0.394                          | 2867.48            | 1130.21            | 0.056                          | 2154.21            | 119.57             |
| A_68_P31143793 | chr17:32250971-32251015                           | NM_008716:52805   | Notch3        | DOWNSTREAM             | 0.141                                                        | 0.589                          | 1923.80            | 1133.46            | 0.083                          | 1442.95            | 120.04             |
| A_68_P28107248 | chr11:107330701-107330745                         | NM_145823:1312    | Pitpnc1       | INSIDE                 | 0.141                                                        | 0.532                          | 2114.44            | 1124.23            | 0.075                          | 1579.74            | 118.72             |
| A_68_P31937055 | chr19:7048934-7048978                             | NM_008889:-581    | Ppp1r14b      | DIVERGENT_PROMOTER     | 0.141                                                        | 0.712                          | 1970.00            | 1401.84            | 0.100                          | 1417.99            | 142.16             |
| A_68_P31713378 | chr18:53623569-53623613                           | NM_001033281:-609 | Prdm6         | PROMOTER               | 0.141                                                        | 0.720                          | 1801.75            | 1296.47            | 0.101                          | 1308.97            | 132.57             |
| A_68_P23308591 | chr4:131393677-131393729                          | NM_001083119:491  | Ptpru         | INSIDE                 | 0.141                                                        | 1.655                          | 2144.36            | 3549.76            | 0.233                          | 1535.45            | 357.65             |
| A_68_P30572550 | chr16:17209655-17209699                           | NM_001033338:1449 | Rimbp3        | INSIDE                 | 0.141                                                        | 0.747                          | 4156.80            | 3106.86            | 0.106                          | 2778.69            | 293.50             |
| A_68_P26710070 | chr9:88334164-88334211                            | NM_172926:-398    | Snx14         | PROMOTER               | 0.141                                                        | 0.522                          | 2405.68            | 1255.27            | 0.074                          | 1962.30            | 144.84             |
| A_68_P26215000 | chr8:122128943-122128988                          | NM_021441:175     | Taf1c         | INSIDE                 | 0.141                                                        | 0.699                          | 1865.55            | 1304.40            | 0.099                          | 1397.70            | 137.69             |
| A_68_P30380064 | chr15:81688492-81688536                           | NM_020507:242     | Tob2          | INSIDE                 | 0.141                                                        | 0.691                          | 1994.19            | 1377.13            | 0.097                          | 1532.96            | 149.05             |
| A_68_P23317940 | chr4:133054507-133054551                          | NM_001081156:63   | Tmp1          | PROMOTER               | 0.141                                                        | 0.584                          | 2921.82            | 1705.71            | 0.083                          | 2092.08            | 172.62             |

| ProbeName      | Target position of probe on CpG island microarray | TargetID          | GeneSymbol    | CpG island Description | Ratio of relative methylation (TiO <sub>2</sub> -NP/Vehicle) | Sham group                     |                    |                    | TiO <sub>2</sub> -H group      |                    |                    |
|----------------|---------------------------------------------------|-------------------|---------------|------------------------|--------------------------------------------------------------|--------------------------------|--------------------|--------------------|--------------------------------|--------------------|--------------------|
|                |                                                   |                   |               |                        |                                                              | Relative methylation (Cy5/Cy3) | Cy3 signal (Input) | Cy5 signal (MeDIP) | Relative methylation (Cy5/Cy3) | Cy3 signal (Input) | Cy5 signal (MeDIP) |
| A_68_P31669249 | chr18:44988742-44988786                           | NM_001163013:446  | Ythdc2        | INSIDE                 | 0.141                                                        | 0.709                          | 1587.57            | 1126.27            | 0.100                          | 1245.48            | 124.69             |
| A_68_P31620881 | chr18:36078954-36078998                           | AK021191:6191     |               | DOWNSTREAM             | 0.141                                                        | 0.513                          | 2471.28            | 1268.09            | 0.072                          | 1813.50            | 131.43             |
| A_68_P21957614 | chr3:14611075-14611119                            | NM_001099674:160  | 1810022K09Rik | INSIDE                 | 0.140                                                        | 1.474                          | 1437.04            | 2118.18            | 0.207                          | 1109.71            | 229.17             |
| A_68_P20504214 | chr1:107561226-107561270                          | NM_029349:811     | 2310035C23Rik | INSIDE                 | 0.140                                                        | 0.684                          | 2519.03            | 1723.27            | 0.096                          | 1977.98            | 189.90             |
| A_68_P25045002 | chr7:35461038-35461082                            | NM_175140:136670  | Chst8         | INSIDE                 | 0.140                                                        | 0.684                          | 1690.55            | 1156.88            | 0.096                          | 1216.16            | 116.90             |
| A_68_P32467455 | chrX:71558602-71558649                            | NM_138607:254     | Fam50a        | INSIDE                 | 0.140                                                        | 1.791                          | 1017.43            | 1822.19            | 0.251                          | 474.27             | 118.97             |
| A_68_P24620291 | chr6:88140777-88140827                            | NM_008090:-7855   | Gata2         | PROMOTER               | 0.140                                                        | 2.317                          | 2466.70            | 5716.21            | 0.325                          | 1622.65            | 527.89             |
| A_68_P28836952 | chr13:14155652-14155696                           | NM_010282:-6      | Ggps1         | DIVERGENT_PROMOTER     | 0.140                                                        | 0.658                          | 2971.62            | 1956.18            | 0.092                          | 2215.76            | 203.63             |
| A_68_P21129657 | chr2:34628148-34628192                            | NM_001163434:561  | Hspa5         | INSIDE                 | 0.140                                                        | 0.581                          | 2196.73            | 1276.73            | 0.082                          | 1521.06            | 124.03             |
| A_68_P25092716 | chr7:52625642-52625686                            | NM_011698:270     | Lin7b         | INSIDE                 | 0.140                                                        | 0.512                          | 2044.28            | 1047.66            | 0.072                          | 1622.61            | 116.58             |
| A_68_P25587299 | chr7:148380231-148380275                          | NM_153777:-789    | Lrrc56        | PROMOTER               | 0.140                                                        | 0.608                          | 1949.57            | 1184.88            | 0.085                          | 1391.28            | 118.56             |
| A_68_P32071012 | chr19:32670221-32670265                           | NM_001201470:38   | Paps2         | INSIDE                 | 0.140                                                        | 0.694                          | 1559.72            | 1082.10            | 0.097                          | 1288.82            | 125.51             |
| A_68_P27901889 | chr11:70467270-70467315                           | NM_011072:860     | Pfn1          | INSIDE                 | 0.140                                                        | 0.714                          | 2299.71            | 1641.87            | 0.100                          | 1771.30            | 177.23             |
| A_68_P22340913 | chr3:94641242-94641288                            | NM_001165948:-224 | Pogz          | PROMOTER               | 0.140                                                        | 0.694                          | 2141.72            | 1485.92            | 0.097                          | 1462.10            | 141.58             |
| A_68_P20557414 | chr1:121401510-121401554                          | NM_022327:-173    | Ralb          | PROMOTER               | 0.140                                                        | 0.616                          | 1876.08            | 1155.68            | 0.086                          | 1397.04            | 120.39             |
| A_68_P31496402 | chr18:11816616-11816661                           | NM_001081223:288  | Rbbp8         | INSIDE                 | 0.140                                                        | 0.659                          | 1681.30            | 1108.46            | 0.092                          | 1244.74            | 114.89             |
| A_68_P29288686 | chr13:10489839-10489883                           | NM_144838:-9      | Sgtb          | DIVERGENT_PROMOTER     | 0.140                                                        | 0.641                          | 2931.60            | 1878.98            | 0.090                          | 2053.70            | 183.87             |
| A_68_P26574086 | chr9:62990509-62990553                            | NM_172446:4257    | Skor1         | INSIDE                 | 0.140                                                        | 1.471                          | 2598.37            | 3822.72            | 0.205                          | 1699.93            | 349.32             |
| A_68_P26787848 | chr9:103663928-103663974                          | NM_178638:217     | Tmem108       | INSIDE                 | 0.140                                                        | 0.520                          | 2130.84            | 1107.00            | 0.073                          | 1676.23            | 121.91             |
| A_68_P32564022 | chrX:98614921-98614970                            | NM_001177985:308  | Zmym3         | INSIDE                 | 0.140                                                        | 1.403                          | 1636.79            | 2296.51            | 0.197                          | 767.63             | 150.92             |
| A_68_P22864043 | chr4:41678560-41678610                            | NM_001017362:-410 | Arid3c        | PROMOTER               | 0.139                                                        | 2.159                          | 3516.81            | 7591.05            | 0.300                          | 2035.89            | 611.32             |
| A_68_P25810705 | chr8:42459691-42459735                            | NM_019734:339     | Asah1         | INSIDE                 | 0.139                                                        | 0.561                          | 2521.91            | 1414.34            | 0.078                          | 2001.07            | 155.57             |
| A_68_P26665706 | chr9:79566930-79566982                            | NM_007730:-471    | Col12a1       | PROMOTER               | 0.139                                                        | 0.578                          | 1800.42            | 1040.62            | 0.080                          | 1449.70            | 116.37             |
| A_68_P25301855 | chr7:95426643-95426687                            | NM_009982:62      | Ctsc          | INSIDE                 | 0.139                                                        | 0.586                          | 2010.20            | 1178.91            | 0.081                          | 1438.24            | 117.22             |
| A_68_P29698995 | chr14:70474363-70474407                           | NM_018781:-2867   | Egr3          | PROMOTER               | 0.139                                                        | 0.548                          | 1932.06            | 1058.90            | 0.076                          | 1522.60            | 115.60             |
| A_68_P32461576 | chrX:70474445-70474489                            | NM_007978:822     | F8a           | INSIDE                 | 0.139                                                        | 2.026                          | 1120.02            | 2269.46            | 0.282                          | 438.88             | 123.64             |
| A_68_P32750743 | chrX:149216712-149216756                          | NM_010951:271     | Gpr143        | INSIDE                 | 0.139                                                        | 1.605                          | 1725.72            | 2770.55            | 0.223                          | 657.78             | 146.37             |
| A_68_P25093127 | chr7:52690084-5269132                             | NM_030678:-100    | Gys1          | DIVERGENT_PROMOTER     | 0.139                                                        | 0.698                          | 1559.87            | 1088.21            | 0.097                          | 1260.83            | 122.64             |
| A_68_P32727713 | chrX:143397691-143397735                          | NM_008312:657     | Htr2c         | INSIDE                 | 0.139                                                        | 2.080                          | 4322.19            | 8992.22            | 0.289                          | 1750.79            | 505.29             |
| A_68_P21906910 | chr2:180629073-180629117                          | NR_029538:350     | Mir124a-3     | DOWNSTREAM             | 0.139                                                        | 0.570                          | 1948.81            | 1110.72            | 0.079                          | 1525.94            | 120.67             |
| A_68_P27950593 | chr11:79524583-79524627                           | NR_029579:866     | Mir193        | PROMOTER               | 0.139                                                        | 0.587                          | 2752.97            | 1614.84            | 0.081                          | 1959.04            | 159.29             |
| A_68_P20352132 | chr1:75121636-75121680                            | NM_029342:142     | Nhej1         | INSIDE                 | 0.139                                                        | 0.526                          | 2274.82            | 1195.65            | 0.073                          | 1641.83            | 120.23             |
| A_68_P27056941 | chr10:34138297-34138341                           | NM_176968:16      | Nt5dc1        | INSIDE                 | 0.139                                                        | 1.588                          | 5026.10            | 7980.69            | 0.220                          | 3697.00            | 813.78             |
| A_68_P27889095 | chr11:68200015-68200060                           | NM_008744:291     | Ntn1          | INSIDE                 | 0.139                                                        | 0.675                          | 1757.64            | 1186.31            | 0.094                          | 1243.46            | 116.80             |
| A_68_P32134234 | chr19:44833782-44833828                           | NM_011037:1921    | Pax2          | INSIDE                 | 0.139                                                        | 1.435                          | 851.73             | 1221.82            | 0.200                          | 596.65             | 119.30             |
| A_68_P23916649 | chr5:98615733-98615777                            | NM_029947:5867    | Prdm8         | INSIDE                 | 0.139                                                        | 1.483                          | 5168.37            | 7663.67            | 0.206                          | 3478.63            | 718.01             |
| A_68_P30475881 | chr15:98507653-98507697                           | NM_172612:218     | Rnd1          | INSIDE                 | 0.139                                                        | 0.618                          | 2848.29            | 1759.93            | 0.086                          | 2208.97            | 189.56             |
| A_68_P32182252 | chr19:53465097-53465141                           | NM_172429:-55     | Smndc1        | PROMOTER               | 0.139                                                        | 0.640                          | 1952.58            | 1249.18            | 0.089                          | 1351.06            | 119.87             |
| A_68_P28523840 | chr12:72116565-72116609                           | NM_001081195:367  | Arid4a        | PROMOTER               | 0.138                                                        | 0.721                          | 2671.37            | 1926.18            | 0.100                          | 2074.18            | 206.87             |
| A_68_P24995570 | chr7:20437597-20437641                            | NM_001033419:9030 | Ceacam16      | INSIDE                 | 0.138                                                        | 0.716                          | 1584.42            | 1134.90            | 0.099                          | 1230.46            | 121.30             |
| A_68_P24138260 | chr5:140385057-140385101                          | NM_175522:1182    | Elfn1         | INSIDE                 | 0.138                                                        | 0.567                          | 1989.09            | 1128.13            | 0.078                          | 1511.23            | 117.91             |
| A_68_P27289056 | chr10:80813448-80813492                           | NM_001163166:-268 | Hmg20b        | DIVERGENT_PROMOTER     | 0.138                                                        | 0.557                          | 2214.07            | 1232.20            | 0.077                          | 1578.63            | 120.94             |
| A_68_P28077065 | chr11:101887780-101887824                         | NM_007863:467     | Mpp3          | INSIDE                 | 0.138                                                        | 0.486                          | 2188.74            | 1063.17            | 0.067                          | 1777.48            | 118.97             |
| A_68_P27184377 | chr10:61596546-61596590                           | NM_009719:731     | Neurog3       | INSIDE                 | 0.138                                                        | 0.702                          | 4953.55            | 3479.40            | 0.097                          | 3214.96            | 312.33             |
| A_68_P30000046 | chr15:8394229-8394273                             | NM_027707:213     | Nipbl         | INSIDE                 | 0.138                                                        | 0.424                          | 2560.38            | 1085.56            | 0.059                          | 2056.75            | 120.77             |
| A_68_P27541262 | chr10:127846864-127846908                         | NM_027257:-34     | Obfc2b        | DIVERGENT_PROMOTER     | 0.138                                                        | 0.649                          | 3690.52            | 2394.30            | 0.090                          | 2625.23            | 235.69             |
| A_68_P24832846 | chr6:127403694-127403738                          | NM_181402:-24     | Parp11        | PROMOTER               | 0.138                                                        | 0.672                          | 1613.64            | 1084.01            | 0.093                          | 1365.72            | 126.94             |
| A_68_P29753328 | chr14:80168173-80168220                           | NM_001042726:2923 | Pedh8         | INSIDE                 | 0.138                                                        | 0.588                          | 2210.42            | 1300.81            | 0.081                          | 1591.26            | 129.65             |
| A_68_P24172759 | chr5:148081959-148082003                          | NM_008814:274     | Pdx1          | INSIDE                 | 0.138                                                        | 0.733                          | 3678.81            | 2696.06            | 0.101                          | 2571.85            | 259.42             |
| A_68_P26605676 | chr9:68502227-68502277                            | NM_013646:644     | Rora          | INSIDE                 | 0.138                                                        | 0.712                          | 1565.16            | 1113.89            | 0.098                          | 1176.29            | 115.52             |
| A_68_P26579681 | chr9:63870209-63870254                            | NM_008542:-365    | Smad6         | PROMOTER               | 0.138                                                        | 0.631                          | 2199.25            | 1387.07            | 0.087                          | 1305.69            | 113.99             |

| ProbeName      | Target position of probe on CpG island microarray | TargetID           | GeneSymbol    | CpG island Description | Ratio of relative methylation (TiO <sub>2</sub> -NP/Vehicle) | Sham group                     |                    |                    | TiO <sub>2</sub> -H group      |                    |                    |
|----------------|---------------------------------------------------|--------------------|---------------|------------------------|--------------------------------------------------------------|--------------------------------|--------------------|--------------------|--------------------------------|--------------------|--------------------|
|                |                                                   |                    |               |                        |                                                              | Relative methylation (Cy5/Cy3) | Cy3 signal (Input) | Cy5 signal (MeDIP) | Relative methylation (Cy5/Cy3) | Cy3 signal (Input) | Cy5 signal (MeDIP) |
| A_68_P22386738 | chr3:103379153-103379197                          | NM_018800:29       | Syt6          | PROMOTER               | 0.138                                                        | 0.547                          | 3752.83            | 2051.75            | 0.075                          | 2824.36            | 212.93             |
| A_68_P23590347 | chr5:34001167-34001211                            | NM_001040435:393   | Tacc3         | INSIDE                 | 0.138                                                        | 0.532                          | 2087.73            | 1110.09            | 0.074                          | 1585.54            | 116.58             |
| A_68_P20638621 | chr1:137210401-137210445                          | NM_011590:-108     | Timm17a       | PROMOTER               | 0.138                                                        | 0.737                          | 4696.09            | 3461.85            | 0.102                          | 3208.97            | 325.98             |
| A_68_P25021123 | chr7:29097166-29097212                            | NM_025616:-123     | Timm50        | PROMOTER               | 0.138                                                        | 0.611                          | 3272.01            | 1999.33            | 0.084                          | 2232.88            | 188.39             |
| A_68_P32114042 | chr19:41337768-41337812                           | NM_133352:704      | Tm9sf3        | INSIDE                 | 0.138                                                        | 0.645                          | 1884.33            | 1215.40            | 0.089                          | 1308.07            | 116.34             |
| A_68_P25947577 | chr8:72149392-72149438                            | NM_001045553:-340  | Zfp868        | PROMOTER               | 0.138                                                        | 0.704                          | 1744.78            | 1227.91            | 0.097                          | 1254.48            | 121.53             |
| A_68_P27835439 | chr11:59015720-59015764                           | NR_037964:191      | 261050710Rik  | INSIDE                 | 0.137                                                        | 0.588                          | 2042.86            | 1201.16            | 0.080                          | 1539.89            | 123.82             |
| A_68_P26373431 | chr9:26806964-26807008                            | NM_025862:148      | Acad8         | INSIDE                 | 0.137                                                        | 0.474                          | 2559.24            | 1211.87            | 0.065                          | 1811.77            | 117.56             |
| A_68_P30337592 | chr15:74346503-74346547                           | NM_174991:-101     | Bai1          | PROMOTER               | 0.137                                                        | 0.677                          | 1685.50            | 1141.21            | 0.093                          | 1259.89            | 116.84             |
| A_68_P26042567 | chr8:91220855-91220899                            | NM_001128170:-50   | Cyld          | PROMOTER               | 0.137                                                        | 0.680                          | 3877.03            | 2636.67            | 0.093                          | 2731.99            | 254.67             |
| A_68_P28914791 | chr13:30077924-30077972                           | NM_010093:-16      | E2f3          | PROMOTER               | 0.137                                                        | 0.436                          | 2865.18            | 1250.54            | 0.060                          | 1910.86            | 114.42             |
| A_68_P27542071 | chr10:128002533-128002577                         | NM_011119:436      | Pa2g4         | INSIDE                 | 0.137                                                        | 0.727                          | 5194.48            | 3777.12            | 0.100                          | 3678.94            | 366.69             |
| A_68_P23185681 | chr4:106323879-106323923                          | NM_001083887:227   | Pars2         | INSIDE                 | 0.137                                                        | 0.584                          | 2148.44            | 1254.58            | 0.080                          | 1505.26            | 120.70             |
| A_68_P32575423 | chrX:101176377-101176421                          | NM_011276:225      | Rlim          | INSIDE                 | 0.137                                                        | 1.409                          | 1738.02            | 2448.18            | 0.193                          | 705.74             | 136.32             |
| A_68_P22049509 | chr3:34562671-34562720                            | NR_015580:103393   | Sox2ot        | INSIDE                 | 0.137                                                        | 0.636                          | 1901.02            | 1208.17            | 0.087                          | 1400.57            | 122.27             |
| A_68_P24327617 | chr6:29559260-29559304                            | NM_177296:325      | Tnpo3         | INSIDE                 | 0.137                                                        | 0.735                          | 6423.12            | 4720.37            | 0.101                          | 4646.03            | 464.23             |
| A_68_P22314484 | chr3:88358116-88358160                            | NM_033526:501      | Ubqln4        | INSIDE                 | 0.137                                                        | 0.544                          | 2132.16            | 1160.56            | 0.074                          | 1560.54            | 115.96             |
| A_68_P21418962 | chr2:90623430-90623474                            | NM_178755:552      | Agbl2         | INSIDE                 | 0.136                                                        | 1.458                          | 737.57             | 1075.64            | 0.199                          | 591.98             | 117.60             |
| A_68_P22941964 | chr4:56877971-56878015                            | NM_018761:91       | Cttnal1       | INSIDE                 | 0.136                                                        | 0.566                          | 4259.49            | 2410.06            | 0.077                          | 3282.49            | 251.89             |
| A_68_P21905698 | chr2:180444588-180444638                          | NM_175551:-7807    | Dido1         | PROMOTER               | 0.136                                                        | 0.472                          | 2594.30            | 1225.42            | 0.064                          | 1819.21            | 117.19             |
| A_68_P29386051 | chr14:8651064-8651108                             | NM_134080:616      | Flnb          | INSIDE                 | 0.136                                                        | 0.522                          | 2409.82            | 1257.60            | 0.071                          | 1705.76            | 121.46             |
| A_68_P30540360 | chr16:9994787-9994831                             | NM_008170:-2182    | Grin2a        | PROMOTER               | 0.136                                                        | 0.567                          | 1991.22            | 1129.72            | 0.077                          | 1490.93            | 115.17             |
| A_68_P32507213 | chrX:83022104-83022148                            | NM_008194:32       | Gyk           | INSIDE                 | 0.136                                                        | 3.630                          | 4744.25            | 17219.68           | 0.495                          | 1881.94            | 930.63             |
| A_68_P31625592 | chr18:36904491-36904538                           | NM_011879:205      | Ik            | INSIDE                 | 0.136                                                        | 0.678                          | 1751.88            | 1188.45            | 0.092                          | 1303.10            | 120.10             |
| A_68_P28079749 | chr11:102328621-102328668                         | NM_010575:2553     | Iga2b         | INSIDE                 | 0.136                                                        | 0.669                          | 2204.81            | 1475.73            | 0.091                          | 1409.57            | 127.98             |
| A_68_P28178579 | chr11:119408457-119408501                         | NM_008730:656      | Nptx1         | INSIDE                 | 0.136                                                        | 0.696                          | 1871.48            | 1302.93            | 0.095                          | 1301.95            | 123.21             |
| A_68_P24133760 | chr5:139605384-139605428                          | NM_008923:300      | Prkar1b       | INSIDE                 | 0.136                                                        | 0.574                          | 2248.19            | 1289.39            | 0.078                          | 1659.87            | 129.63             |
| A_68_P32481889 | chrX:75828853-75828902                            | NM_001164275:244   | Prrgl1        | INSIDE                 | 0.136                                                        | 1.555                          | 1385.57            | 2154.44            | 0.212                          | 576.68             | 122.29             |
| A_68_P21115161 | chr2:32252153-32252197                            | NM_133783:765      | Ptges2        | INSIDE                 | 0.136                                                        | 0.594                          | 2144.51            | 1273.43            | 0.081                          | 1420.51            | 114.72             |
| A_68_P27910560 | chr11:72080885-72080933                           | NM_001004148:-802  | Slc13a5       | PROMOTER               | 0.136                                                        | 0.700                          | 1720.46            | 1203.84            | 0.095                          | 1331.47            | 126.50             |
| A_68_P32401095 | chrX:54646102-54646148                            | NR_002903:-1438    | Snord61       | PROMOTER               | 0.136                                                        | 1.529                          | 1540.62            | 2355.91            | 0.209                          | 624.49             | 130.23             |
| A_68_P21396039 | chr2:84888658-84888702                            | NM_001081260:-1936 | Tnks1bp1      | PROMOTER               | 0.136                                                        | 0.598                          | 3705.39            | 2214.45            | 0.082                          | 2725.49            | 222.19             |
| A_68_P27804727 | chr11:53244769-53244814                           | NM_025352:-458     | Uqerq         | DIVERGENT_PROMOTER     | 0.136                                                        | 0.472                          | 2385.36            | 1124.72            | 0.064                          | 1820.09            | 117.07             |
| A_68_P23296400 | chr4:129054411-129054455                          | NM_028603:840      | Zbtb8a        | INSIDE                 | 0.136                                                        | 0.622                          | 4062.61            | 2525.45            | 0.085                          | 3035.03            | 257.52             |
| A_68_P25657168 | chr8:11727352-11727396                            | NM_001113517:-730  | Arhgef7       | PROMOTER               | 0.135                                                        | 1.363                          | 1967.00            | 2681.30            | 0.184                          | 1363.99            | 250.51             |
| A_68_P23961348 | chr5:106886251-106886295                          | NM_001005477:913   | Barhl2        | INSIDE                 | 0.135                                                        | 0.591                          | 2335.12            | 1379.35            | 0.080                          | 1669.97            | 133.27             |
| A_68_P32040830 | chr19:27504703-27504752                           | NR_027987:201      | C030016D13Rik | INSIDE                 | 0.135                                                        | 0.698                          | 1691.61            | 1180.67            | 0.094                          | 1241.33            | 116.78             |
| A_68_P26132332 | chr8:107748862-107748908                          | NM_145604:-203     | D230025D16Rik | PROMOTER               | 0.135                                                        | 0.694                          | 1698.26            | 1178.06            | 0.094                          | 1288.11            | 120.64             |
| A_68_P29160014 | chr13:77847868-77847912                           | NM_001163419:-60   | Fam172a       | PROMOTER               | 0.135                                                        | 0.727                          | 2969.61            | 2157.54            | 0.098                          | 2344.87            | 230.17             |
| A_68_P21477082 | chr2:102290453-102290497                          | NM_010218:1475     | Fjx1          | INSIDE                 | 0.135                                                        | 1.859                          | 930.80             | 1730.25            | 0.250                          | 714.43             | 178.68             |
| A_68_P28043606 | chr11:96165053-96165098                           | NM_008268:250      | Hoxb5         | INSIDE                 | 0.135                                                        | 0.595                          | 2809.13            | 1671.01            | 0.080                          | 1699.38            | 136.07             |
| A_68_P32375459 | chrX:48558594-48558638                            | NM_134163:393      | Mbnl3         | INSIDE                 | 0.135                                                        | 1.594                          | 2211.23            | 3523.80            | 0.215                          | 885.86             | 190.30             |
| A_68_P24796451 | chr6:119987387-119987431                          | NR_030487:-3079    | Mir706        | PROMOTER               | 0.135                                                        | 0.530                          | 2312.86            | 1226.42            | 0.071                          | 1732.05            | 123.66             |
| A_68_P23608588 | chr5:36925165-36925210                            | NM_133910:-141     | Tbc1d14       | PROMOTER               | 0.135                                                        | 0.507                          | 2254.95            | 1143.40            | 0.068                          | 1693.06            | 115.56             |
| A_68_P24153542 | chr5:143578302-143578350                          | NM_001122730:740   | Tnrc18        | INSIDE                 | 0.135                                                        | 0.577                          | 2329.17            | 1344.42            | 0.078                          | 1499.81            | 116.77             |
| A_68_P28166392 | chr11:117517198-117517249                         | NM_198022:1621     | Tnrc6c        | INSIDE                 | 0.135                                                        | 0.677                          | 1899.77            | 1286.31            | 0.091                          | 1297.93            | 118.68             |
| A_68_P32700055 | chrX:137132673-137132722                          | NM_001077364:2364  | Tsc22d3       | INSIDE                 | 0.135                                                        | 1.560                          | 1367.22            | 2133.18            | 0.211                          | 569.62             | 119.94             |
| A_68_P27942765 | chr11:78157408-78157455                           | NM_011676:408      | Unc119        | INSIDE                 | 0.135                                                        | 0.599                          | 1847.99            | 1106.68            | 0.081                          | 1445.23            | 116.78             |
| A_68_P28694453 | chr12:104187317-104187361                         | NM_001081017:270   | Unc79         | INSIDE                 | 0.135                                                        | 0.658                          | 1775.46            | 1169.04            | 0.089                          | 1317.48            | 116.97             |
| A_68_P21425362 | chr2:91761645-91761689                            | NM_007699:-679     | Chrm4         | PROMOTER               | 0.134                                                        | 0.659                          | 2073.81            | 1367.59            | 0.088                          | 1417.75            | 124.99             |
| A_68_P26659811 | chr9:78328698-78328742                            | NM_010106:811      | Eef1a1        | INSIDE                 | 0.134                                                        | 0.497                          | 2332.21            | 1159.60            | 0.067                          | 1815.37            | 121.26             |

| ProbeName      | Target position of probe on CpG island microarray | TargetID              | GeneSymbol    | CpG island Description | Ratio of relative methylation (TiO <sub>2</sub> -NP/Vehicle) | Sham group                     |                    |                    | TiO <sub>2</sub> -H group      |                    |                    |
|----------------|---------------------------------------------------|-----------------------|---------------|------------------------|--------------------------------------------------------------|--------------------------------|--------------------|--------------------|--------------------------------|--------------------|--------------------|
|                |                                                   |                       |               |                        |                                                              | Relative methylation (Cy5/Cy3) | Cy3 signal (Input) | Cy5 signal (MeDIP) | Relative methylation (Cy5/Cy3) | Cy3 signal (Input) | Cy5 signal (MeDIP) |
| A_68_P31493048 | chr18:11053045-11053099                           | NM_010258:565         | Gata6         | INSIDE                 | 0.134                                                        | 0.629                          | 2098.04            | 1318.64            | 0.084                          | 1449.86            | 122.10             |
| A_68_P30501066 | chr15:102798113-102798164                         | NM_010462:912         | Hoxc10        | INSIDE                 | 0.134                                                        | 1.464                          | 822.14             | 1203.90            | 0.196                          | 593.66             | 116.37             |
| A_68_P23356913 | chr4:139800280-139800324                          | NM_198610:2424        | Igfbp1        | INSIDE                 | 0.134                                                        | 0.551                          | 2225.57            | 1226.01            | 0.074                          | 1662.21            | 122.44             |
| A_68_P26884587 | chr9:121550968-121551014                          | NM_026915:-306        | Lyz4l         | DIVERGENT_PROMOTER     | 0.134                                                        | 0.413                          | 3297.10            | 1363.09            | 0.055                          | 2095.23            | 115.81             |
| A_68_P32252895 | chrX:10295371-10295422                            | NM_001166635:906      | Mid1ip1       | INSIDE                 | 0.134                                                        | 1.498                          | 1469.74            | 2202.29            | 0.201                          | 584.01             | 117.45             |
| A_68_P24993777 | chr7:20108952-20108996                            | NM_027116:4895        | Nkpd1         | INSIDE                 | 0.134                                                        | 0.706                          | 1525.27            | 1076.21            | 0.094                          | 1239.64            | 117.04             |
| A_68_P25326015 | chr7:99817991-99818041                            | NM_029078:406         | Pcf11         | INSIDE                 | 0.134                                                        | 0.614                          | 2628.65            | 1613.87            | 0.082                          | 1783.14            | 147.02             |
| A_68_P31542489 | chr18:21160241-21160286                           | NM_019706:422         | Rnf138        | INSIDE                 | 0.134                                                        | 0.490                          | 2635.47            | 1291.67            | 0.066                          | 1794.92            | 117.62             |
| A_68_P31936365 | chr19:6914837-6914881                             | NM_019924:233         | Rps6ka4       | INSIDE                 | 0.134                                                        | 0.578                          | 2018.64            | 1167.04            | 0.078                          | 1500.59            | 116.39             |
| A_68_P24066623 | chr5:125869716-125869760                          | NM_019639:649         | Ubc           | INSIDE                 | 0.134                                                        | 0.634                          | 6152.72            | 3902.70            | 0.085                          | 4499.47            | 382.72             |
| A_68_P23440549 | chr4:155148502-155148549                          | NM_147776:145         | Vwa1          | INSIDE                 | 0.134                                                        | 0.746                          | 3334.18            | 2486.17            | 0.100                          | 2021.41            | 201.88             |
| A_68_P26337051 | chr9:18277941-18277985                            | NM_028935:41          | Zfp558        | INSIDE                 | 0.134                                                        | 1.754                          | 5047.42            | 8850.97            | 0.235                          | 3329.71            | 780.91             |
| A_68_P23278552 | chr4:125840552-125840597                          | NM_025856:-665        | 1700029G01Rik | PROMOTER               | 0.133                                                        | 0.599                          | 1894.74            | 1134.87            | 0.080                          | 1477.44            | 117.46             |
| A_68_P31834411 | chr18:75165635-75165679                           | NM_001001181:103      | BC031181      | INSIDE                 | 0.133                                                        | 0.492                          | 2926.85            | 1439.99            | 0.065                          | 2239.99            | 146.57             |
| A_68_P22733181 | chr4:12016440-12016484                            | NM_198957:-54         | C430048L16Rik | DIVERGENT_PROMOTER     | 0.133                                                        | 0.608                          | 3136.35            | 1906.29            | 0.081                          | 2171.18            | 176.00             |
| A_68_P23592273 | chr7:112574745-112574790                          | NM_007627:434         | Cekbr         | INSIDE                 | 0.133                                                        | 1.597                          | 1130.99            | 1806.52            | 0.213                          | 807.15             | 172.02             |
| A_68_P31715729 | chr18:54021378-54021423                           | NM_152809:-366        | Csnk1g3       | PROMOTER               | 0.133                                                        | 0.698                          | 1796.19            | 1253.59            | 0.093                          | 1298.58            | 120.61             |
| A_68_P20864294 | chr1:180458639-180458683                          | NM_001161665:-595     | Kif26b        | PROMOTER               | 0.133                                                        | 0.590                          | 1901.92            | 1121.91            | 0.079                          | 1535.15            | 120.81             |
| A_68_P24990787 | chr7:19577120-19577164                            | NM_145579:549         | Mypop         | INSIDE                 | 0.133                                                        | 0.688                          | 2030.37            | 1397.06            | 0.092                          | 1293.77            | 118.59             |
| A_68_P23592273 | chrX:98625083-98625127                            | NM_023144:115         | Nono          | INSIDE                 | 0.133                                                        | 2.727                          | 2528.62            | 6895.70            | 0.363                          | 1121.06            | 406.96             |
| A_68_P26318242 | chr9:14419308-14419352                            | NM_001081395:114      | Amot1         | INSIDE                 | 0.132                                                        | 0.390                          | 2953.45            | 1152.58            | 0.052                          | 2339.58            | 120.67             |
| A_68_P31786168 | chr18:66451122-66451166                           | NM_178793:348         | Cebe1         | INSIDE                 | 0.132                                                        | 0.583                          | 2758.49            | 1607.95            | 0.077                          | 2137.94            | 164.38             |
| A_68_P24218883 | chr6:6831846-6831891                              | NM_010056:200         | Dlx5          | INSIDE                 | 0.132                                                        | 0.639                          | 1804.65            | 1152.74            | 0.084                          | 1392.22            | 117.51             |
| A_68_P24992782 | chr7:19930618-19930662                            | NM_001127324:221      | Erccl         | INSIDE                 | 0.132                                                        | 0.641                          | 2054.47            | 1316.54            | 0.085                          | 1416.51            | 119.88             |
| A_68_P30630405 | chr16:28445397-28445447                           | NM_183064:-109        | Fgf12         | PROMOTER               | 0.132                                                        | 0.604                          | 1991.04            | 1201.71            | 0.080                          | 1536.08            | 122.51             |
| A_68_P27784885 | chr11:49607988-49608032                           | NM_013529:354         | Gfpt2         | INSIDE                 | 0.132                                                        | 0.724                          | 2312.34            | 1674.19            | 0.095                          | 1774.82            | 169.11             |
| A_68_P23637423 | chr5:42155238-42155282                            | NM_007524:199         | Nkx3-2        | INSIDE                 | 0.132                                                        | 0.503                          | 2263.37            | 1138.25            | 0.066                          | 1817.30            | 120.68             |
| A_68_P23398660 | chr4:148473749-148473793                          | NM_019781:151         | Pex14         | INSIDE                 | 0.132                                                        | 0.512                          | 2249.34            | 1152.53            | 0.068                          | 1731.93            | 116.97             |
| A_68_P26022893 | chr8:87493563-87493607                            | NM_011563:38          | Prdx2         | INSIDE                 | 0.132                                                        | 0.692                          | 1815.95            | 1256.13            | 0.091                          | 1297.37            | 118.31             |
| A_68_P32699218 | chrX:136991656-136991701                          | NM_021463:537         | Prps1         | INSIDE                 | 0.132                                                        | 1.782                          | 2722.01            | 4849.49            | 0.235                          | 1221.70            | 286.79             |
| A_68_P21838402 | chr2:167757994-167758038                          | NM_011201:190         | Ptpn1         | INSIDE                 | 0.132                                                        | 0.707                          | 3742.12            | 2644.22            | 0.093                          | 2602.61            | 242.23             |
| A_68_P32182254 | chr19:53465262-53465306                           | NM_172429:-221        | Smndc1        | PROMOTER               | 0.132                                                        | 1.442                          | 4708.15            | 6791.25            | 0.190                          | 2951.27            | 561.30             |
| A_68_P26426686 | chr9:36575536-36575582                            | NM_008408:-395        | Stt3a         | PROMOTER               | 0.132                                                        | 0.475                          | 2701.04            | 1283.39            | 0.063                          | 1951.49            | 122.58             |
| A_68_P28712203 | chr12:107201190-107201235                         | BC156654:163352       |               | INSIDE                 | 0.132                                                        | 0.599                          | 2051.59            | 1228.35            | 0.079                          | 1487.66            | 117.74             |
| A_68_P26640503 | chr9:74696233-74696287                            | ENSMUST00000160950:-9 |               | PROMOTER               | 0.132                                                        | 0.725                          | 1651.57            | 1197.11            | 0.096                          | 1253.99            | 120.22             |
| A_68_P26569953 | chr9:62189357-62189414                            | NM_009672:236         | Anp32a        | INSIDE                 | 0.131                                                        | 1.346                          | 3294.51            | 4435.43            | 0.176                          | 2266.30            | 399.76             |
| A_68_P22376200 | chr3:101408960-101409004                          | NM_144900:-402        | Atp1a1        | PROMOTER               | 0.131                                                        | 0.564                          | 2175.68            | 1226.08            | 0.074                          | 1686.48            | 124.14             |
| A_68_P27892739 | chr11:68859626-68859680                           | NM_011496:508         | Aurkb         | INSIDE                 | 0.131                                                        | 0.673                          | 1749.18            | 1176.88            | 0.088                          | 1324.96            | 116.93             |
| A_68_P29020701 | chr13:48761510-48761554                           | NM_007526:3128        | Barx1         | INSIDE                 | 0.131                                                        | 0.583                          | 2230.01            | 1299.99            | 0.077                          | 1576.23            | 120.77             |
| A_68_P21617363 | chr2:127951507-127951551                          | NM_009754:-245        | Bcl2l11       | PROMOTER               | 0.131                                                        | 0.540                          | 3192.45            | 1724.28            | 0.071                          | 2353.84            | 166.18             |
| A_68_P32260619 | chrX:11710953-11710997                            | NM_001168321:26507    | Bcor          | INSIDE                 | 0.131                                                        | 1.496                          | 1663.66            | 2489.66            | 0.196                          | 587.51             | 115.14             |
| A_68_P29682517 | chr14:67627899-67627944                           | NM_009761:-207        | Bnip3l        | PROMOTER               | 0.131                                                        | 0.540                          | 2816.41            | 1521.44            | 0.071                          | 2123.86            | 150.15             |
| A_68_P30940064 | chr16:87495686-87495730                           | NM_009840:406         | Cet8          | INSIDE                 | 0.131                                                        | 0.663                          | 1643.15            | 1089.66            | 0.087                          | 1360.88            | 118.03             |
| A_68_P31145618 | chr17:32589827-32589872                           | NM_177307:182         | Cyp4f39       | INSIDE                 | 0.131                                                        | 1.497                          | 3862.24            | 5780.25            | 0.197                          | 2548.25            | 501.03             |
| A_68_P27618338 | chr11:17853460-17853504                           | NM_026576:396         | Etaa1         | INSIDE                 | 0.131                                                        | 0.309                          | 3631.53            | 1123.96            | 0.041                          | 3010.45            | 122.49             |
| A_68_P25949749 | chr8:72610964-72611013                            | NM_177900:3561        | Hapln4        | INSIDE                 | 0.131                                                        | 0.627                          | 1941.82            | 1218.02            | 0.082                          | 1464.96            | 120.13             |
| A_68_P26674970 | chr9:81525437-81525481                            | NM_010482:701         | Htr1b         | INSIDE                 | 0.131                                                        | 1.657                          | 1442.29            | 2389.37            | 0.216                          | 1120.28            | 242.37             |
| A_68_P25577540 | chr7:146574599-146574643                          | NM_001127363:-387     | Inpp5a        | PROMOTER               | 0.131                                                        | 0.719                          | 1925.47            | 1384.90            | 0.094                          | 1298.73            | 122.41             |
| A_68_P22210126 | chr3:67267629-67267673                            | NM_016753:179         | Lxn           | INSIDE                 | 0.131                                                        | 1.604                          | 3191.32            | 5120.21            | 0.210                          | 2275.08            | 476.80             |
| A_68_P30295267 | chr15:66800261-66800306                           | NM_008681:920         | Ndrgr1        | INSIDE                 | 0.131                                                        | 0.714                          | 5724.36            | 4086.71            | 0.094                          | 3879.17            | 363.39             |
| A_68_P26640636 | chr9:74711696-74711740                            | NM_008262:1991        | Onecut1       | INSIDE                 | 0.131                                                        | 0.727                          | 1690.21            | 1229.19            | 0.095                          | 1204.16            | 114.72             |



| ProbeName      | Target position of probe on CpG island microarray | TargetID          | GeneSymbol    | CpG island Description | Ratio of relative methylation (TiO <sub>2</sub> -NP/Vehicle) | Sham group                     |                    |                    | TiO <sub>2</sub> -H group      |                    |                    |
|----------------|---------------------------------------------------|-------------------|---------------|------------------------|--------------------------------------------------------------|--------------------------------|--------------------|--------------------|--------------------------------|--------------------|--------------------|
|                |                                                   |                   |               |                        |                                                              | Relative methylation (Cy5/Cy3) | Cy3 signal (Input) | Cy5 signal (MeDIP) | Relative methylation (Cy5/Cy3) | Cy3 signal (Input) | Cy5 signal (MeDIP) |
| A_68_P31128243 | chr17:29629131-29629176                           | NM_008842:1164    | Pim1          | INSIDE                 | 0.131                                                        | 0.642                          | 1937.35            | 1244.54            | 0.084                          | 1438.02            | 120.82             |
| A_68_P20085263 | chr1:22812453-22812497                            | NM_001012623:89   | Rims1         | INSIDE                 | 0.131                                                        | 2.441                          | 2858.24            | 6977.07            | 0.320                          | 1868.49            | 597.44             |
| A_68_P22215801 | chr3:68299336-68299380                            | NR_036665:1244    | Schip1        | INSIDE                 | 0.131                                                        | 0.728                          | 1665.00            | 1211.78            | 0.095                          | 1256.49            | 119.50             |
| A_68_P32240689 | chrX:7461201-7461245                              | NM_001083937:147  | Sle35a2       | PROMOTER               | 0.131                                                        | 2.395                          | 2067.91            | 4953.34            | 0.314                          | 730.87             | 229.37             |
| A_68_P21626533 | chr2:129625984-129626034                          | NM_001038635:244  | Stk35         | PROMOTER               | 0.131                                                        | 0.624                          | 2138.25            | 1333.29            | 0.082                          | 1454.08            | 118.73             |
| A_68_P29493860 | chr14:29319799-29319843                           | NM_009524:1162    | Wnt5a         | INSIDE                 | 0.131                                                        | 0.700                          | 5111.08            | 3578.10            | 0.092                          | 3653.85            | 336.16             |
| A_68_P31468070 | chr18:5334710-5334760                             | NM_178722:297     | Zfp438        | PROMOTER               | 0.131                                                        | 2.465                          | 1927.74            | 4752.17            | 0.324                          | 1133.78            | 366.87             |
| A_68_P29509868 | chr14:31941877-31941922                           | NR_024069:217     | 2010107H07Rik | INSIDE                 | 0.130                                                        | 0.704                          | 2899.08            | 2041.86            | 0.091                          | 1914.49            | 174.97             |
| A_68_P27534317 | chr10:126602065-126602109                         | NM_008080:194     | B4galnt1      | PROMOTER               | 0.130                                                        | 0.678                          | 2554.98            | 1733.41            | 0.088                          | 1791.88            | 158.48             |
| A_68_P32448984 | chrX:67730148-67730192                            | NM_001033328:48   | BC023829      | INSIDE                 | 0.130                                                        | 1.472                          | 1503.18            | 2212.90            | 0.191                          | 603.15             | 115.41             |
| A_68_P22715818 | chr4:8619237-8619281                              | NM_001081417:1191 | Chd7          | INSIDE                 | 0.130                                                        | 0.666                          | 1707.28            | 1136.37            | 0.086                          | 1404.23            | 121.23             |
| A_68_P21612302 | chr2:127073420-127073472                          | NM_025296:106     | Ciao1         | INSIDE                 | 0.130                                                        | 0.530                          | 2767.80            | 1465.57            | 0.069                          | 1905.78            | 130.69             |
| A_68_P21767847 | chr2:155651782-155651827                          | NM_010579:857     | Eif6          | INSIDE                 | 0.130                                                        | 1.558                          | 884.45             | 1377.62            | 0.202                          | 573.61             | 115.78             |
| A_68_P32752564 | chrX:149672338-149672390                          | NM_173780:223     | Klf8          | PROMOTER               | 0.130                                                        | 2.195                          | 1003.62            | 2203.31            | 0.286                          | 416.60             | 119.04             |
| A_68_P30961704 | chr16:9122772-91227816                            | NM_016967:2000    | Olig2         | INSIDE                 | 0.130                                                        | 0.577                          | 2070.35            | 1193.89            | 0.075                          | 1565.33            | 117.67             |
| A_68_P26429014 | chr9:36953463-36953512                            | NM_001029838:1364 | Pknox2        | INSIDE                 | 0.130                                                        | 0.716                          | 1838.18            | 1316.95            | 0.093                          | 1397.56            | 130.05             |
| A_68_P25368679 | chr7:107755747-107755795                          | NM_001163663:329  | Rab6          | PROMOTER               | 0.130                                                        | 0.489                          | 2520.81            | 1231.91            | 0.064                          | 1815.48            | 115.33             |
| A_68_P31151053 | chr17:34067535-34067579                           | NM_009059:718     | Rgl2          | INSIDE                 | 0.130                                                        | 2.716                          | 4198.16            | 11404.20           | 0.352                          | 2488.69            | 877.13             |
| A_68_P31383392 | chr17:80878882-80878927                           | NM_009231:889     | Sos1          | INSIDE                 | 0.130                                                        | 0.617                          | 1928.79            | 1189.92            | 0.080                          | 1500.61            | 120.37             |
| A_68_P23330845 | chr4:135412711-135412755                          | NM_001080387:726  | Srsf10        | INSIDE                 | 0.130                                                        | 0.704                          | 2020.04            | 1421.74            | 0.091                          | 1484.32            | 135.30             |
| A_68_P26247723 | chr8:127316765-127316809                          | NM_198632:132     | Trim67        | PROMOTER               | 0.130                                                        | 0.582                          | 2110.45            | 1229.32            | 0.076                          | 1611.02            | 122.21             |
| A_68_P27837323 | chr11:59320124-59320168                           | NM_001130529:4    | Zkscan17      | PROMOTER               | 0.130                                                        | 0.660                          | 1810.35            | 1194.00            | 0.085                          | 1387.29            | 118.52             |
| A_68_P26892248 | chr9:122860010-122860061                          | NM_025419:83      | 1110059G10Rik | INSIDE                 | 0.129                                                        | 0.610                          | 2098.94            | 1280.17            | 0.078                          | 1497.80            | 117.56             |
| A_68_P22398705 | chr3:105508370-105508414                          | NM_001163356:17   | 6530418L21Rik | INSIDE                 | 0.129                                                        | 1.684                          | 7314.69            | 12316.09           | 0.218                          | 5002.22            | 1090.55            |
| A_68_P32321494 | chrX:34588841-34588885                            | NM_173779:23      | Ankrd58       | INSIDE                 | 0.129                                                        | 2.083                          | 923.08             | 1923.07            | 0.268                          | 435.96             | 116.80             |
| A_68_P25484114 | chr7:130514088-130514135                          | NM_001122640:682  | Arhgap17      | DIVERGENT_PROMOTER     | 0.129                                                        | 0.670                          | 1932.37            | 1294.52            | 0.086                          | 1376.75            | 118.92             |
| A_68_P25588374 | chr7:148547481-148547530                          | NR_033532:3504    | B230206H07Rik | INSIDE                 | 0.129                                                        | 1.759                          | 3300.83            | 5805.26            | 0.227                          | 2256.96            | 512.73             |
| A_68_P28041231 | chr11:95721147-95721199                           | NM_008081:55013   | B4galnt2      | DOWNSTREAM             | 0.129                                                        | 0.632                          | 1736.33            | 1097.68            | 0.082                          | 1457.13            | 119.06             |
| A_68_P32448986 | chrX:67730422-67730470                            | NM_001033328:228  | BC023829      | PROMOTER               | 0.129                                                        | 2.099                          | 1192.19            | 2502.00            | 0.271                          | 455.59             | 123.30             |
| A_68_P23094685 | chr4:88922650-88922694                            | NM_001040654:5424 | Cdkn2a        | INSIDE                 | 0.129                                                        | 0.449                          | 2482.98            | 1113.76            | 0.058                          | 2022.74            | 117.38             |
| A_68_P25082380 | chr7:50699539-50699583                            | NM_026695:48      | Etfb          | INSIDE                 | 0.129                                                        | 0.584                          | 2169.19            | 1267.53            | 0.075                          | 1600.96            | 120.22             |
| A_68_P27897167 | chr11:69614867-69614911                           | NM_010198:239     | Fgf11         | INSIDE                 | 0.129                                                        | 0.646                          | 2032.92            | 1312.96            | 0.083                          | 1410.84            | 117.31             |
| A_68_P24874512 | chr6:136757288-136757338                          | NM_177688:544     | H2afj         | INSIDE                 | 0.129                                                        | 1.345                          | 3864.97            | 5199.27            | 0.173                          | 2528.08            | 438.36             |
| A_68_P30500964 | chr15:102785193-102785237                         | NM_001024842:258  | Hoxc11        | INSIDE                 | 0.129                                                        | 0.585                          | 2165.22            | 1266.42            | 0.076                          | 1605.07            | 121.34             |
| A_68_P22056224 | chr3:35899487-35899534                            | NM_023644:90      | Mecc1         | INSIDE                 | 0.129                                                        | 0.627                          | 2218.23            | 1390.88            | 0.081                          | 1506.04            | 121.77             |
| A_68_P32563202 | chrX:98469396-98469440                            | NM_021521:11      | Med12         | DIVERGENT_PROMOTER     | 0.129                                                        | 1.795                          | 3286.56            | 5899.12            | 0.231                          | 1244.23            | 287.86             |
| A_68_P27794923 | chr11:51433377-51433421                           | NM_026631:124     | Nhp2          | INSIDE                 | 0.129                                                        | 0.688                          | 5485.20            | 3774.02            | 0.089                          | 3748.07            | 333.08             |
| A_68_P21723787 | chr2:147191374-147191418                          | NM_008780:667     | Pax1          | INSIDE                 | 0.129                                                        | 0.702                          | 1777.16            | 1247.03            | 0.091                          | 1304.96            | 118.15             |
| A_68_P25607698 | chr7:151739256-151739302                          | NM_001033319:356  | Ppfia1        | INSIDE                 | 0.129                                                        | 0.554                          | 2015.67            | 1117.52            | 0.071                          | 1612.47            | 115.05             |
| A_68_P22210464 | chr3:67319384-67319428                            | NM_001164763:39   | Rarres1       | INSIDE                 | 0.129                                                        | 0.715                          | 5444.87            | 3895.74            | 0.092                          | 4132.73            | 380.10             |
| A_68_P21395950 | chr2:84877269-84877313                            | NM_182990:67      | Ssrp1         | DIVERGENT_PROMOTER     | 0.129                                                        | 0.655                          | 4429.49            | 2899.56            | 0.084                          | 3164.63            | 267.09             |
| A_68_P30296504 | chr15:67007424-67007469                           | NM_009177:998     | St3gal1       | INSIDE                 | 0.129                                                        | 0.738                          | 3133.21            | 2312.57            | 0.095                          | 2072.70            | 197.79             |
| A_68_P21831888 | chr2:166612033-166612077                          | NM_023815:7212    | Trp53rk       | PROMOTER               | 0.129                                                        | 3.650                          | 3562.89            | 13005.70           | 0.471                          | 2209.23            | 1041.49            |
| A_68_P31977523 | chr19:16058932-16058979                           | NM_198019:524     | Cep78         | INSIDE                 | 0.128                                                        | 0.673                          | 1732.51            | 1166.79            | 0.086                          | 1360.79            | 117.39             |
| A_68_P32145754 | chr19:46835869-46835913                           | NM_001102471:208  | Cnrm2         | PROMOTER               | 0.128                                                        | 0.596                          | 2133.60            | 1271.49            | 0.076                          | 1611.46            | 123.22             |
| A_68_P29651214 | chr14:62267812-62267856                           | NR_028264:33376   | Dleu2         | INSIDE                 | 0.128                                                        | 1.640                          | 4837.12            | 7933.72            | 0.210                          | 3150.69            | 661.54             |
| A_68_P24839024 | chr6:128388816-128388862                          | NR_028592:64      | Gm10069       | INSIDE                 | 0.128                                                        | 0.586                          | 1903.76            | 1115.11            | 0.075                          | 1663.82            | 124.44             |
| A_68_P28565713 | chr12:79849962-79850008                           | NM_019579:51      | Mpp5          | INSIDE                 | 0.128                                                        | 1.530                          | 971.41             | 1486.55            | 0.196                          | 804.23             | 157.64             |
| A_68_P30732552 | chr16:46496367-46496411                           | NM_021496:692     | Pvrl3         | INSIDE                 | 0.128                                                        | 0.394                          | 3493.19            | 1377.76            | 0.050                          | 2607.68            | 131.51             |
| A_68_P23922675 | chr5:99681822-99681866                            | NM_145839:102     | Rasgef1b      | INSIDE                 | 0.128                                                        | 0.513                          | 2574.10            | 1321.64            | 0.066                          | 1827.96            | 119.74             |
| A_68_P32401097 | chrX:54646265-54646313                            | NR_029425:75      | Rbmx          | PROMOTER               | 0.128                                                        | 1.422                          | 1637.78            | 2328.45            | 0.182                          | 653.37             | 118.78             |

| ProbeName      | Target position of probe on CpG island microarray | TargetID                 | GeneSymbol    | CpG island Description | Ratio of relative methylation (TiO <sub>2</sub> -NP/Vehicle) | Sham group                     |                    |                    | TiO <sub>2</sub> -H group      |                    |                    |
|----------------|---------------------------------------------------|--------------------------|---------------|------------------------|--------------------------------------------------------------|--------------------------------|--------------------|--------------------|--------------------------------|--------------------|--------------------|
|                |                                                   |                          |               |                        |                                                              | Relative methylation (Cy5/Cy3) | Cy3 signal (Input) | Cy5 signal (MeDIP) | Relative methylation (Cy5/Cy3) | Cy3 signal (Input) | Cy5 signal (MeDIP) |
| A_68_P27687370 | chr1:132105281-32105325                           | NM_030093:-112           | Snmp25        | DIVERGENT_PROMOTER     | 0.128                                                        | 0.712                          | 5116.91            | 3643.70            | 0.091                          | 3504.23            | 318.35             |
| A_68_P31632490 | chr18:38345712-38345769                           | ENSMUST00000160721:25967 |               | INSIDE                 | 0.128                                                        | 2.704                          | 1699.48            | 4594.65            | 0.345                          | 1227.59            | 423.70             |
| A_68_P30472461 | chr15:97832553-97832597                           | NM_001113515:2581        | Col2a1        | INSIDE                 | 0.127                                                        | 0.664                          | 2322.67            | 1542.97            | 0.084                          | 1548.26            | 130.13             |
| A_68_P28610001 | chr12:87763573-87763617                           | NM_011934:1001           | Esrrb         | INSIDE                 | 0.127                                                        | 0.636                          | 3568.00            | 2268.71            | 0.081                          | 2543.10            | 205.08             |
| A_68_P26129635 | chr8:107165709-107165753                          | NM_026753:-102           | Fam96b        | PROMOTER               | 0.127                                                        | 0.686                          | 1791.31            | 1228.27            | 0.087                          | 1378.49            | 119.71             |
| A_68_P21129807 | chr2:34655295-34655339                            | NM_145522:-5             | Rabepk        | PROMOTER               | 0.127                                                        | 0.607                          | 2249.73            | 1365.76            | 0.077                          | 1530.40            | 117.81             |
| A_68_P24591630 | chr6:83085934-83085978                            | NM_009106:-1121          | Rtkn          | PROMOTER               | 0.127                                                        | 0.606                          | 2364.55            | 1432.02            | 0.077                          | 1647.87            | 127.14             |
| A_68_P21835387 | chr2:167247383-167247427                          | NM_148929:184            | Sle9a8        | INSIDE                 | 0.127                                                        | 0.351                          | 3404.37            | 1196.55            | 0.045                          | 2679.10            | 119.63             |
| A_68_P26023339 | chr8:87561977-87562021                            | NM_001122843:932         | Tnpo2         | INSIDE                 | 0.127                                                        | 0.513                          | 2537.94            | 1303.00            | 0.065                          | 1860.45            | 121.30             |
| A_68_P20632252 | chr1:136132290-136132334                          | NM_001039510:-304        | Adora1        | PROMOTER               | 0.126                                                        | 0.486                          | 2639.68            | 1282.81            | 0.061                          | 1928.81            | 118.51             |
| A_68_P31102614 | chr17:25392741-25392785                           | NM_001163270:547         | Baiap3        | INSIDE                 | 0.126                                                        | 0.569                          | 2446.22            | 1392.56            | 0.072                          | 1652.46            | 118.29             |
| A_68_P24008814 | chr5:115729967-115730011                          | NM_026504:278            | Coq5          | INSIDE                 | 0.126                                                        | 0.506                          | 2392.61            | 1209.75            | 0.064                          | 1832.64            | 116.88             |
| A_68_P21134955 | chr2:35517597-35517641                            | NM_001114124:40118       | Dab2ip        | INSIDE                 | 0.126                                                        | 0.466                          | 3157.98            | 1473.09            | 0.059                          | 2508.24            | 147.00             |
| A_68_P32467037 | chrX:71491458-71491502                            | NM_010227:393            | Flna          | INSIDE                 | 0.126                                                        | 1.843                          | 3760.51            | 6930.66            | 0.232                          | 1298.04            | 301.57             |
| A_68_P25582013 | chr7:147243953-147243997                          | NM_010836:-8987          | Msx3          | PROMOTER               | 0.126                                                        | 0.660                          | 2504.54            | 1653.55            | 0.083                          | 1781.17            | 148.44             |
| A_68_P23399010 | chr4:148540735-148540779                          | NM_001081274:60          | Pgd           | INSIDE                 | 0.126                                                        | 0.529                          | 2356.26            | 1247.01            | 0.067                          | 1780.51            | 118.91             |
| A_68_P24950807 | chr7:4796189-4796233                              | NM_172737:88             | Shisa7        | INSIDE                 | 0.126                                                        | 1.434                          | 3560.55            | 5105.55            | 0.180                          | 2393.68            | 432.05             |
| A_68_P27688940 | chr11:32354802-32354846                           | NM_173784:-547           | Ubt2          | PROMOTER               | 0.126                                                        | 0.492                          | 2761.76            | 1358.95            | 0.062                          | 1967.27            | 122.45             |
| A_68_P32239781 | chrX:7291710-7291754                              | NM_172372:-7642          | Wdr45         | PROMOTER               | 0.126                                                        | 1.812                          | 1260.22            | 2284.02            | 0.228                          | 529.90             | 120.67             |
| A_68_P25026074 | chr7:30023055-30023109                            | NM_001110201:-259        | Yif1b         | DIVERGENT_PROMOTER     | 0.126                                                        | 0.731                          | 1790.00            | 1308.71            | 0.092                          | 1284.30            | 118.20             |
| A_68_P32388635 | chrX:51019534-51019578                            | NM_029142:-8451          | 4930502E18Rik | PROMOTER               | 0.125                                                        | 1.397                          | 1691.96            | 2363.75            | 0.174                          | 691.77             | 120.70             |
| A_68_P23456813 | chr5:5664349-5664400                              | NM_172447:-142           | A330021E22Rik | PROMOTER               | 0.125                                                        | 0.695                          | 1930.87            | 1342.01            | 0.087                          | 1419.02            | 123.07             |
| A_68_P25776089 | chr8:35871359-35871403                            | NM_176933:717            | Dusp4         | INSIDE                 | 0.125                                                        | 0.701                          | 2310.37            | 1619.92            | 0.088                          | 1707.32            | 150.16             |
| A_68_P28530099 | chr12:73186645-73186689                           | NM_001205067:-159        | Jkamp         | DIVERGENT_PROMOTER     | 0.125                                                        | 0.505                          | 2580.37            | 1301.83            | 0.063                          | 2039.39            | 128.45             |
| A_68_P25960687 | chr8:74843237-74843281                            | NM_008452:298            | Klf2          | INSIDE                 | 0.125                                                        | 1.386                          | 4459.19            | 6180.08            | 0.173                          | 2925.50            | 507.23             |
| A_68_P23668851 | chr5:48375153-48375197                            | NM_178804:781            | Slit2         | INSIDE                 | 0.125                                                        | 0.662                          | 2755.17            | 1823.56            | 0.083                          | 1884.78            | 155.78             |
| A_68_P31929158 | chr19:5510644-5510688                             | NM_001024560:-177        | Snx32         | PROMOTER               | 0.125                                                        | 0.551                          | 2326.60            | 1281.65            | 0.069                          | 1788.48            | 123.46             |
| A_68_P20936014 | chr1:192886534-192886578                          | NM_001163421:255         | Tatdn3        | INSIDE                 | 0.125                                                        | 0.724                          | 2061.60            | 1492.45            | 0.090                          | 1561.98            | 140.93             |
| A_68_P22413376 | chr3:108365347-108365394                          | NM_026198:14             | Tmem167b      | INSIDE                 | 0.125                                                        | 0.560                          | 2408.04            | 1347.79            | 0.070                          | 1649.43            | 114.99             |
| A_68_P24994886 | chr7:20300585-20300629                            | NM_001109748:172         | Tomm40        | INSIDE                 | 0.125                                                        | 0.549                          | 2347.38            | 1289.31            | 0.069                          | 1698.43            | 116.58             |
| A_68_P22589080 | chr3:141831851-141831895                          | ENSMUST00000098568:305   |               | INSIDE                 | 0.125                                                        | 0.495                          | 3749.75            | 1857.87            | 0.062                          | 2791.64            | 172.60             |
| A_68_P22727925 | chr4:11003436-11003481                            | NM_001085493:-107        | 2310030N02Rik | PROMOTER               | 0.124                                                        | 0.484                          | 3046.12            | 1474.87            | 0.060                          | 2014.35            | 120.50             |
| A_68_P26569954 | chr9:62189473-62189517                            | NM_009672:345            | Anp32a        | INSIDE                 | 0.124                                                        | 2.725                          | 6282.22            | 17120.84           | 0.338                          | 4433.06            | 1500.03            |
| A_68_P22058284 | chr3:36374544-36374588                            | NM_009673:243            | Anxa5         | INSIDE                 | 0.124                                                        | 0.607                          | 2100.48            | 1274.01            | 0.075                          | 1531.04            | 115.44             |
| A_68_P27308102 | chr10:84851199-84851243                           | NM_028709:1662           | Btbd11        | INSIDE                 | 0.124                                                        | 0.604                          | 2262.41            | 1366.82            | 0.075                          | 1635.23            | 122.97             |
| A_68_P29928901 | chr14:117325143-117325187                         | NM_001079844:628         | Gpc6          | INSIDE                 | 0.124                                                        | 0.488                          | 3170.00            | 1545.95            | 0.061                          | 2569.44            | 155.61             |
| A_68_P30425256 | chr15:89284256-89284300                           | NM_021921:-63            | Mapk8ip2      | PROMOTER               | 0.124                                                        | 1.457                          | 2526.93            | 3681.12            | 0.180                          | 1644.22            | 296.73             |
| A_68_P25448400 | chr7:123648290-123648334                          | NM_016773:425            | Nucb2         | INSIDE                 | 0.124                                                        | 1.395                          | 4436.86            | 6188.51            | 0.173                          | 2668.75            | 460.58             |
| A_68_P27567707 | chr11:6191869-6191913                             | NM_010956:291            | Ogdh          | INSIDE                 | 0.124                                                        | 0.481                          | 6923.48            | 3326.88            | 0.060                          | 5190.09            | 309.95             |
| A_68_P28152867 | chr11:115195826-115195870                         | NM_027132:-199           | Otop3         | PROMOTER               | 0.124                                                        | 0.539                          | 2165.40            | 1167.89            | 0.067                          | 1730.15            | 115.63             |
| A_68_P32672687 | chrX:131120488-131120543                          | NM_019865:323            | Rpl36a        | INSIDE                 | 0.124                                                        | 2.125                          | 1292.59            | 2746.20            | 0.264                          | 453.43             | 119.72             |
| A_68_P31142315 | chr17:31993161-31993205                           | NM_010831:-445           | Sik1          | PROMOTER               | 0.124                                                        | 0.520                          | 2504.48            | 1302.91            | 0.065                          | 1876.04            | 121.20             |
| A_68_P30546420 | chr16:11134105-11134152                           | NM_029582:497            | Txndc11       | INSIDE                 | 0.124                                                        | 0.494                          | 2990.76            | 1478.87            | 0.062                          | 2120.31            | 130.46             |
| A_68_P27912781 | chr11:72503632-72503676                           | NM_009671:151            | Ankfy1        | INSIDE                 | 0.123                                                        | 0.621                          | 2038.00            | 1264.73            | 0.077                          | 1511.33            | 115.69             |
| A_68_P26511318 | chr9:51574321-51574365                            | NM_175535:886            | Arhgap20      | INSIDE                 | 0.123                                                        | 0.651                          | 2394.91            | 1559.34            | 0.080                          | 1801.54            | 143.76             |
| A_68_P31458877 | chr18:3508057-3508101                             | NM_026505:124            | Bambi         | INSIDE                 | 0.123                                                        | 0.667                          | 1882.72            | 1255.86            | 0.082                          | 1447.38            | 119.13             |
| A_68_P32572441 | chrX:100551713-100551757                          | NM_009767:-80            | Chic1         | PROMOTER               | 0.123                                                        | 1.887                          | 3718.74            | 7015.74            | 0.232                          | 1422.98            | 329.87             |
| A_68_P27541866 | chr10:127962475-127962519                         | NM_011843:419            | Esytl1        | INSIDE                 | 0.123                                                        | 1.410                          | 999.92             | 1409.50            | 0.174                          | 685.70             | 119.16             |
| A_68_P20842589 | chr1:176432473-176432517                          | NM_019445:539            | Fmn2          | INSIDE                 | 0.123                                                        | 0.446                          | 3203.00            | 1427.30            | 0.055                          | 2178.44            | 119.27             |
| A_68_P24992660 | chr7:19905290-19905334                            | NM_008036:-9918          | Fosb          | PROMOTER               | 0.123                                                        | 0.710                          | 2042.26            | 1450.16            | 0.087                          | 1557.15            | 135.59             |
| A_68_P20997432 | chr2:9796607-9796655                              | NM_008091:3597           | Gata3         | INSIDE                 | 0.123                                                        | 1.582                          | 3687.92            | 5833.72            | 0.195                          | 2669.74            | 519.95             |

| ProbeName      | Target position of probe on CpG island microarray | TargetID           | GeneSymbol    | CpG island Description | Ratio of relative methylation (TiO <sub>2</sub> -NP/Vehicle) | Sham group                     |                    |                    | TiO <sub>2</sub> -H group      |                    |                    |
|----------------|---------------------------------------------------|--------------------|---------------|------------------------|--------------------------------------------------------------|--------------------------------|--------------------|--------------------|--------------------------------|--------------------|--------------------|
|                |                                                   |                    |               |                        |                                                              | Relative methylation (Cy5/Cy3) | Cy3 signal (Input) | Cy5 signal (MeDIP) | Relative methylation (Cy5/Cy3) | Cy3 signal (Input) | Cy5 signal (MeDIP) |
| A_68_P32378022 | chrX:49033742-49033786                            | NM_015819:-110     | Hs6st2        | PROMOTER               | 0.123                                                        | 2.217                          | 3471.88            | 7696.60            | 0.274                          | 1469.37            | 401.91             |
| A_68_P23352770 | chr4:139130352-139130396                          | NM_001205173:-260  | Iffo2         | PROMOTER               | 0.123                                                        | 0.618                          | 4871.11            | 3009.05            | 0.076                          | 3422.52            | 259.95             |
| A_68_P20138851 | chr1:34496844-34496888                            | NM_178601:193      | Imp4          | INSIDE                 | 0.123                                                        | 0.647                          | 1745.92            | 1129.72            | 0.079                          | 1505.66            | 119.43             |
| A_68_P23956788 | chr5:106129546-106129590                          | NM_178701:-260     | Lrrc8d        | PROMOTER               | 0.123                                                        | 0.655                          | 1992.46            | 1305.40            | 0.080                          | 1507.63            | 121.00             |
| A_68_P24819297 | chr6:125141590-125141635                          | NM_146171:-8       | Ncapd2        | DIVERGENT_PROMOTER     | 0.123                                                        | 0.585                          | 2401.71            | 1405.14            | 0.072                          | 1778.15            | 127.85             |
| A_68_P32082682 | chr19:34953665-34953709                           | NM_023792:-1279    | Pank1         | PROMOTER               | 0.123                                                        | 0.687                          | 1815.11            | 1246.87            | 0.084                          | 1436.69            | 120.99             |
| A_68_P26818269 | chr9:108998498-108998542                          | NM_172775:571      | Plxnb1        | INSIDE                 | 0.123                                                        | 0.660                          | 2060.00            | 1360.27            | 0.081                          | 1481.71            | 120.42             |
| A_68_P20472799 | chr1:99666240-99666284                            | NM_173760:407      | Ppip5k2       | INSIDE                 | 0.123                                                        | 0.628                          | 2042.56            | 1281.87            | 0.077                          | 1514.72            | 117.17             |
| A_68_P32699219 | chrX:136991758-136991802                          | NM_021463:639      | Prps1         | INSIDE                 | 0.123                                                        | 1.590                          | 2272.75            | 3614.55            | 0.195                          | 864.05             | 168.70             |
| A_68_P23152973 | chr4:100742175-100742219                          | NM_183024:554      | Raver2        | INSIDE                 | 0.123                                                        | 2.177                          | 3486.44            | 7590.62            | 0.268                          | 2492.45            | 667.52             |
| A_68_P21420492 | chr2:90910618-90910662                            | NM_026721:-262     | Slc39a13      | PROMOTER               | 0.123                                                        | 0.611                          | 2065.79            | 1262.26            | 0.075                          | 1559.32            | 117.02             |
| A_68_P23236660 | chr4:117508118-117508162                          | NM_008135:278      | Slc6a9        | INSIDE                 | 0.123                                                        | 1.455                          | 3112.36            | 4528.70            | 0.179                          | 2055.57            | 367.46             |
| A_68_P22869408 | chr4:43013304-43013349                            | NM_009503:53       | Vcp           | INSIDE                 | 0.123                                                        | 0.560                          | 2539.12            | 1421.82            | 0.069                          | 1820.77            | 125.42             |
| A_68_P32403901 | chrX:55283389-55283441                            | NM_009575:-390     | Zic3          | PROMOTER               | 0.123                                                        | 2.087                          | 1230.12            | 2567.23            | 0.256                          | 471.82             | 120.76             |
| A_68_P20046439 | chr1:14496966-14497010                            |                    |               | Unknown                | 0.123                                                        | 0.534                          | 2416.60            | 1289.36            | 0.066                          | 1770.32            | 116.31             |
| A_68_P22202960 | chr3:65778708-65778752                            | AK133062:4895      |               | DOWNSTREAM             | 0.123                                                        | 0.513                          | 3982.07            | 2042.19            | 0.063                          | 3057.39            | 192.12             |
| A_68_P27288850 | chr10:80783292-80783342                           | NM_027381:-531     | 2510012I08Rik | PROMOTER               | 0.122                                                        | 1.612                          | 9780.00            | 15761.68           | 0.196                          | 5849.40            | 1146.91            |
| A_68_P28615065 | chr12:88607920-88607964                           | NM_146036:265      | Ahsa1         | INSIDE                 | 0.122                                                        | 0.638                          | 2048.00            | 1306.59            | 0.078                          | 1546.60            | 120.84             |
| A_68_P27170204 | chr10:59165501-59165545                           | NM_144822:140      | Cbara1        | INSIDE                 | 0.122                                                        | 0.649                          | 2515.02            | 1632.99            | 0.079                          | 1963.89            | 155.06             |
| A_68_P25952216 | chr8:73018033-73018077                            | NM_018827:1000     | Crf1          | INSIDE                 | 0.122                                                        | 0.669                          | 1916.75            | 1282.14            | 0.081                          | 1472.21            | 119.92             |
| A_68_P30673613 | chr16:36071461-36071505                           | NM_027342:119      | Fam162a       | INSIDE                 | 0.122                                                        | 0.572                          | 3357.25            | 1921.90            | 0.070                          | 2572.09            | 179.47             |
| A_68_P31559063 | chr18:24365030-24365074                           | NM_001160404:558   | Galnt1        | INSIDE                 | 0.122                                                        | 0.448                          | 2673.05            | 1196.27            | 0.055                          | 2135.21            | 116.59             |
| A_68_P31672403 | chr18:45719784-45719828                           | NM_080465:-1       | Kenn2         | PROMOTER               | 0.122                                                        | 0.682                          | 3612.23            | 2463.14            | 0.083                          | 2621.15            | 217.18             |
| A_68_P27796185 | chr11:51670574-51670621                           | NM_199299:386      | Phf15         | INSIDE                 | 0.122                                                        | 0.697                          | 1875.77            | 1307.39            | 0.085                          | 1377.92            | 116.85             |
| A_68_P26469282 | chr9:44542109-44542153                            | NM_153537:1147     | Phldb1        | INSIDE                 | 0.122                                                        | 0.617                          | 2150.08            | 1326.41            | 0.075                          | 1559.08            | 117.66             |
| A_68_P23308584 | chr4:131392713-131392757                          | NM_001083119:1459  | Ptpnu         | INSIDE                 | 0.122                                                        | 4.185                          | 11964.07           | 50074.15           | 0.512                          | 7209.21            | 3692.26            |
| A_68_P23152972 | chr4:100742061-100742105                          | NM_183024:440      | Raver2        | INSIDE                 | 0.122                                                        | 2.092                          | 3660.61            | 7659.09            | 0.255                          | 2427.75            | 618.92             |
| A_68_P30381703 | chr15:81977883-81977927                           | NM_033218:206      | Sreb2         | INSIDE                 | 0.122                                                        | 0.735                          | 7136.20            | 5242.94            | 0.090                          | 4976.80            | 445.44             |
| A_68_P23400515 | chr4:148800617-148800661                          | NM_022022:102      | Ube4b         | INSIDE                 | 0.122                                                        | 0.452                          | 3107.56            | 1405.64            | 0.055                          | 2084.13            | 114.58             |
| A_68_P28598366 | chr12:85791678-85791722                           | NM_134042:200      | Aldh6a1       | INSIDE                 | 0.121                                                        | 1.332                          | 7482.58            | 9964.34            | 0.161                          | 4747.57            | 765.86             |
| A_68_P20936670 | chr1:193007730-193007774                          | NM_007498:-540     | Atf3          | PROMOTER               | 0.121                                                        | 0.524                          | 2412.38            | 1263.17            | 0.064                          | 1813.19            | 115.16             |
| A_68_P24586431 | chr6:81991939-81991986                            | NM_145570:341      | Fam176a       | INSIDE                 | 0.121                                                        | 0.510                          | 2562.49            | 1307.44            | 0.062                          | 1949.39            | 120.16             |
| A_68_P27898357 | chr11:69805074-69805118                           | NM_019749:225      | Gabarap       | INSIDE                 | 0.121                                                        | 0.715                          | 6255.46            | 4472.78            | 0.087                          | 4212.30            | 364.58             |
| A_68_P31936885 | chr19:7026235-7026279                             | NM_001177361:-9316 | Gpr137        | PROMOTER               | 0.121                                                        | 0.695                          | 1914.49            | 1330.29            | 0.084                          | 1427.45            | 119.85             |
| A_68_P21092001 | chr2:28438373-28438417                            | NM_148928:405      | Gtf3e5        | INSIDE                 | 0.121                                                        | 0.596                          | 2181.26            | 1299.59            | 0.072                          | 1686.92            | 121.48             |
| A_68_P25044856 | chr7:35438432-35438491                            | NM_146188:-601     | Ketd15        | PROMOTER               | 0.121                                                        | 0.663                          | 1966.91            | 1303.13            | 0.080                          | 1459.30            | 116.61             |
| A_68_P30559668 | chr16:13941247-13941291                           | NM_033564:481      | Mpv17i        | INSIDE                 | 0.121                                                        | 0.701                          | 2164.81            | 1518.24            | 0.085                          | 1616.77            | 137.42             |
| A_68_P29269006 | chr13:101321942-101321987                         | NM_008756:489      | Ocn           | INSIDE                 | 0.121                                                        | 1.621                          | 1050.20            | 1701.96            | 0.196                          | 752.48             | 147.50             |
| A_68_P20745868 | chr1:158870188-158870239                          | NM_001159965:-456  | Ralgs2        | PROMOTER               | 0.121                                                        | 0.713                          | 1773.03            | 1264.17            | 0.086                          | 1351.45            | 116.36             |
| A_68_P24950806 | chr7:4796112-4796158                              | NM_172737:164      | Shisa7        | INSIDE                 | 0.121                                                        | 1.807                          | 1285.74            | 2323.97            | 0.219                          | 728.10             | 159.74             |
| A_68_P22488497 | chr3:123211440-123211484                          | NR_028574:-208     | Snhg8         | PROMOTER               | 0.121                                                        | 0.544                          | 2563.94            | 1393.82            | 0.066                          | 1843.59            | 121.55             |
| A_68_P20878088 | chr1:181476368-181476413                          | NM_008249:8        | Tfb2m         | INSIDE                 | 0.121                                                        | 0.557                          | 3069.15            | 1710.86            | 0.068                          | 2181.28            | 147.28             |
| A_68_P26504539 | chr9:50412320-50412364                            | NM_013897:337      | Timm8b        | INSIDE                 | 0.121                                                        | 0.619                          | 2527.45            | 1565.30            | 0.075                          | 1687.83            | 126.48             |
| A_68_P21797520 | chr2:160698110-160698154                          | NM_177263:594      | Zhx3          | INSIDE                 | 0.121                                                        | 0.556                          | 4546.46            | 2527.45            | 0.067                          | 3220.19            | 217.36             |
| A_68_P25429183 | chr7:120351014-120351062                          | NM_007489:60       | Arntl         | INSIDE                 | 0.120                                                        | 0.613                          | 2021.53            | 1239.23            | 0.073                          | 1635.69            | 120.17             |
| A_68_P23237356 | chr4:117599653-117599697                          | NM_009711:2694     | Artn          | INSIDE                 | 0.120                                                        | 0.681                          | 2787.19            | 1896.90            | 0.082                          | 2092.35            | 171.28             |
| A_68_P32260575 | chrX:11705762-11705806                            | NM_001168321:31697 | Bcor          | INSIDE                 | 0.120                                                        | 2.661                          | 5788.90            | 15404.08           | 0.320                          | 2050.19            | 656.24             |
| A_68_P28054684 | chr11:98010545-98010589                           | NM_028149:364      | Fbxl20        | INSIDE                 | 0.120                                                        | 0.546                          | 3521.42            | 1921.09            | 0.066                          | 2742.18            | 180.13             |
| A_68_P28054692 | chr11:98011319-98011364                           | NM_028149:-411     | Fbxl20        | PROMOTER               | 0.120                                                        | 0.423                          | 3374.31            | 1427.53            | 0.051                          | 2373.73            | 120.90             |
| A_68_P20618261 | chr1:133806870-133806914                          | NM_001145804:-142  | Nucls1        | PROMOTER               | 0.120                                                        | 0.645                          | 2518.02            | 1623.65            | 0.077                          | 1776.11            | 136.92             |
| A_68_P21141628 | chr2:37214555-37214599                            | NM_026176:276      | Pdcl          | INSIDE                 | 0.120                                                        | 0.666                          | 6876.50            | 4579.52            | 0.080                          | 4719.56            | 378.34             |

| ProbeName      | Target position of probe on CpG island microarray | TargetID               | GeneSymbol    | CpG island Description | Ratio of relative methylation (TiO <sub>2</sub> -NP/Vehicle) | Sham group                     |                    |                    | TiO <sub>2</sub> -H group      |                    |                    |
|----------------|---------------------------------------------------|------------------------|---------------|------------------------|--------------------------------------------------------------|--------------------------------|--------------------|--------------------|--------------------------------|--------------------|--------------------|
|                |                                                   |                        |               |                        |                                                              | Relative methylation (Cy5/Cy3) | Cy3 signal (Input) | Cy5 signal (MeDIP) | Relative methylation (Cy5/Cy3) | Cy3 signal (Input) | Cy5 signal (MeDIP) |
| A_68_P33012166 | chr9_random:55669-55721                           | NM_011154:-662         | Ppp2r3d       | PROMOTER               | 0.120                                                        | 1.474                          | 3323.84            | 4900.44            | 0.177                          | 2200.93            | 388.78             |
| A_68_P21796146 | chr2:160471717-160471761                          | NM_009408:106          | Top1          | INSIDE                 | 0.120                                                        | 0.735                          | 2672.00            | 1965.25            | 0.088                          | 1902.34            | 167.62             |
| A_68_P32289746 | chrX:20281381-20281426                            | NM_145628:369          | Usp11         | INSIDE                 | 0.120                                                        | 4.915                          | 2187.48            | 10750.72           | 0.587                          | 841.62             | 494.36             |
| A_68_P28164939 | chr11:117255727-117255786                         | AK020888:9870          |               | DOWNSTREAM             | 0.120                                                        | 1.776                          | 737.41             | 1309.46            | 0.212                          | 569.00             | 120.85             |
| A_68_P28833743 | chr13:12794811-12794860                           | ENSMUST00000104944:207 |               | INSIDE                 | 0.120                                                        | 0.644                          | 2159.85            | 1390.41            | 0.077                          | 1624.23            | 125.01             |
| A_68_P28175454 | chr11:118902921-118902967                         | NM_013926:-717         | Cbx8          | PROMOTER               | 0.119                                                        | 0.624                          | 2397.33            | 1496.36            | 0.075                          | 1616.81            | 120.46             |
| A_68_P24141722 | chr5:140981721-140981765                          | NM_021528:180          | Chst12        | INSIDE                 | 0.119                                                        | 0.703                          | 2447.89            | 1721.20            | 0.083                          | 1826.94            | 152.43             |
| A_68_P31473763 | chr18:6516415-6516459                             | NM_007935:-351         | Epc1          | PROMOTER               | 0.119                                                        | 0.396                          | 3517.30            | 1394.07            | 0.047                          | 2585.96            | 122.12             |
| A_68_P28493248 | chr12:66067408-66067452                           | NM_177805:702          | Fam179b       | INSIDE                 | 0.119                                                        | 0.562                          | 2658.49            | 1493.43            | 0.067                          | 1807.59            | 120.61             |
| A_68_P25260792 | chr7:86537034-86537078                            | NM_145946:-167         | Fanci         | DIVERGENT_PROMOTER     | 0.119                                                        | 0.577                          | 3528.27            | 2035.24            | 0.069                          | 2574.59            | 177.44             |
| A_68_P28696316 | chr12:104480086-104480133                         | NM_133364:247          | Prima1        | INSIDE                 | 0.119                                                        | 1.830                          | 4927.57            | 9019.29            | 0.217                          | 3356.33            | 729.43             |
| A_68_P29568495 | chr14:45608828-45608874                           | NM_008964:1065         | Ptger2        | INSIDE                 | 0.119                                                        | 0.650                          | 2329.74            | 1514.40            | 0.077                          | 1565.49            | 120.82             |
| A_68_P20412616 | chr1:88425208-88425252                            | NM_008972:1920         | Ptma          | INSIDE                 | 0.119                                                        | 0.612                          | 2756.72            | 1688.08            | 0.073                          | 1995.33            | 145.61             |
| A_68_P20348986 | chr1:74552917-74552961                            | NM_021383:305          | Rqcd1         | INSIDE                 | 0.119                                                        | 0.604                          | 3884.63            | 2347.81            | 0.072                          | 2909.90            | 209.55             |
| A_68_P25372612 | chr7:108470032-108470076                          | NM_019990:222          | Stard10       | INSIDE                 | 0.119                                                        | 0.634                          | 1962.15            | 1244.37            | 0.075                          | 1567.90            | 118.15             |
| A_68_P23429333 | chr4:153515623-153515667                          | NM_021499:-836         | Wdr8          | DIVERGENT_PROMOTER     | 0.119                                                        | 0.723                          | 2820.28            | 2039.80            | 0.086                          | 1905.93            | 164.32             |
| A_68_P24325497 | chr6:29222598-29222642                            | NM_023516:-5           | 2310016C08Rik | PROMOTER               | 0.118                                                        | 0.676                          | 2101.49            | 1420.29            | 0.080                          | 1546.45            | 123.23             |
| A_68_P26237607 | chr8:125566355-125566399                          | NM_001081379:-192      | Ankrd11       | PROMOTER               | 0.118                                                        | 0.542                          | 2633.19            | 1426.02            | 0.064                          | 1914.55            | 122.42             |
| A_68_P20166296 | chr1:39592351-39592396                            | NM_028043:-273         | D1Bwg0212e    | PROMOTER               | 0.118                                                        | 0.686                          | 1771.19            | 1215.27            | 0.081                          | 1484.78            | 120.16             |
| A_68_P26591484 | chr9:66005801-66005855                            | NM_010019:-204         | Dapk2         | PROMOTER               | 0.118                                                        | 1.566                          | 4337.79            | 6795.09            | 0.185                          | 2207.90            | 524.49             |
| A_68_P31925905 | chr19:4928339-4928383                             | NM_133803:-73          | Dpp3          | PROMOTER               | 0.118                                                        | 0.740                          | 2862.19            | 2119.12            | 0.087                          | 2088.62            | 182.69             |
| A_68_P30356906 | chr15:77801158-77801202                           | NM_018749:74           | Eif3d         | INSIDE                 | 0.118                                                        | 0.574                          | 2446.97            | 1403.66            | 0.068                          | 1774.70            | 120.56             |
| A_68_P32560535 | chrX:97821487-97821531                            | NM_008446:105          | Kif4          | INSIDE                 | 0.118                                                        | 2.407                          | 3312.54            | 7972.91            | 0.283                          | 1261.11            | 356.94             |
| A_68_P23057187 | chr4:82152716-82152762                            | NM_001113209:-1526     | Nfib          | PROMOTER               | 0.118                                                        | 1.803                          | 1003.91            | 1810.13            | 0.213                          | 665.53             | 141.99             |
| A_68_P23415879 | chr4:151368860-151368904                          | NM_172705:1406         | Phf13         | INSIDE                 | 0.118                                                        | 0.591                          | 2449.97            | 1449.12            | 0.070                          | 1678.49            | 116.66             |
| A_68_P30146825 | chr15:37890467-37890516                           | NM_199476:319          | Rrm2b         | INSIDE                 | 0.118                                                        | 0.694                          | 2097.80            | 1456.49            | 0.082                          | 1460.65            | 119.90             |
| A_68_P29937467 | chr14:118633748-118633793                         | NM_177753:2482         | Sox21         | INSIDE                 | 0.118                                                        | 0.747                          | 3815.18            | 2850.82            | 0.089                          | 2628.25            | 232.63             |
| A_68_P24603257 | chr6:85087734-85087778                            | NM_011467:2            | Spr           | INSIDE                 | 0.118                                                        | 0.636                          | 1909.44            | 1213.74            | 0.075                          | 1589.35            | 119.51             |
| A_68_P26023334 | chr8:87561401-87561445                            | NM_001122843:356       | Tnpo2         | INSIDE                 | 0.118                                                        | 2.630                          | 15621.84           | 41083.68           | 0.311                          | 10145.26           | 3155.63            |
| A_68_P23560760 | chr5:28444814-28444860                            |                        | Unknown       |                        | 0.118                                                        | 1.546                          | 1307.99            | 2022.48            | 0.183                          | 915.59             | 167.35             |
| A_68_P27798578 | chr11:52127606-52127657                           | L12152:204721          |               | INSIDE                 | 0.118                                                        | 1.679                          | 755.65             | 1268.77            | 0.199                          | 598.53             | 118.96             |
| A_68_P24362054 | chr6:35489548-35489592                            | NM_008098:318          | Mtpn          | INSIDE                 | 0.117                                                        | 0.500                          | 2604.67            | 1301.98            | 0.058                          | 2118.06            | 123.82             |
| A_68_P30497294 | chr15:102162316-102162360                         | NM_021713:199          | Myg1          | INSIDE                 | 0.117                                                        | 0.483                          | 3419.15            | 1651.18            | 0.057                          | 2543.67            | 144.28             |
| A_68_P32564063 | chrX:98625189-98625233                            | NM_023144:221          | Nono          | INSIDE                 | 0.117                                                        | 1.638                          | 1939.09            | 3175.27            | 0.191                          | 774.86             | 148.30             |
| A_68_P27693121 | chr11:33063184-33063228                           | NM_008722:-150         | Npm1          | PROMOTER               | 0.117                                                        | 0.440                          | 3131.95            | 1379.56            | 0.052                          | 2250.00            | 116.41             |
| A_68_P26640621 | chr9:74709991-74710035                            | NM_008262:285          | Onecut1       | INSIDE                 | 0.117                                                        | 0.739                          | 6982.63            | 5156.91            | 0.086                          | 4531.49            | 390.53             |
| A_68_P23277932 | chr4:125735548-125735592                          | NM_172701:-238         | Osep1         | PROMOTER               | 0.117                                                        | 0.700                          | 2061.16            | 1443.65            | 0.082                          | 1485.22            | 122.08             |
| A_68_P24066362 | chr5:125821382-125821426                          | NM_001205082:60        | Scarb1        | INSIDE                 | 0.117                                                        | 0.693                          | 3135.41            | 2172.49            | 0.081                          | 2016.71            | 164.03             |
| A_68_P26540093 | chr9:56924054-56924108                            | NM_001110350:-102      | Sin3a         | PROMOTER               | 0.117                                                        | 0.635                          | 2431.69            | 1544.02            | 0.075                          | 1730.32            | 129.05             |
| A_68_P32341131 | chrX:39503134-39503178                            | NM_021465:-721         | Stag2         | PROMOTER               | 0.117                                                        | 1.760                          | 3510.26            | 6179.39            | 0.206                          | 1499.73            | 308.32             |
| A_68_P25598465 | chr7:150255389-150255433                          | NM_001115085:138       | Tssc4         | INSIDE                 | 0.117                                                        | 0.590                          | 3081.52            | 1817.23            | 0.069                          | 2287.58            | 158.45             |
| A_68_P30350784 | chr15:76648087-76648131                           | NM_001168288:492       | Arhgap39      | INSIDE                 | 0.116                                                        | 5.436                          | 21824.95           | 118649.00          | 0.632                          | 14501.69           | 9161.22            |
| A_68_P22503486 | chr3:126300384-126300428                          | NM_001025438:516       | Camk2d        | INSIDE                 | 0.116                                                        | 0.600                          | 2437.09            | 1463.02            | 0.070                          | 1683.84            | 117.34             |
| A_68_P31565720 | chr18:25645973-25646017                           | NM_001146292:266490    | Celf4         | INSIDE                 | 0.116                                                        | 0.644                          | 2386.56            | 1537.11            | 0.075                          | 1600.31            | 119.46             |
| A_68_P21425363 | chr2:91761712-91761756                            | NM_007699:-611         | Chrm4         | PROMOTER               | 0.116                                                        | 0.654                          | 2283.50            | 1493.54            | 0.076                          | 1559.52            | 118.08             |
| A_68_P31121207 | chr17:28360556-28360600                           | NM_027185:15856        | Def6          | INSIDE                 | 0.116                                                        | 0.624                          | 2452.55            | 1530.13            | 0.072                          | 1955.89            | 141.70             |
| A_68_P21601162 | chr2:125073336-125073380                          | NM_023595:108          | Dut           | INSIDE                 | 0.116                                                        | 0.746                          | 3746.94            | 2796.44            | 0.087                          | 2518.72            | 217.98             |
| A_68_P30377509 | chr15:81191134-81191178                           | NM_011399:39           | Slc25a17      | INSIDE                 | 0.116                                                        | 0.650                          | 2295.39            | 1492.02            | 0.076                          | 1681.37            | 127.13             |
| A_68_P32747584 | chrX:148450937-148450989                          | NM_019710:-8           | Smc1a         | DIVERGENT_PROMOTER     | 0.116                                                        | 1.495                          | 1800.44            | 2691.20            | 0.174                          | 692.72             | 120.34             |
| A_68_P23238475 | chr4:117807044-117807088                          | NM_009176:429          | St3gal3       | INSIDE                 | 0.116                                                        | 0.714                          | 2675.68            | 1910.93            | 0.083                          | 2011.02            | 166.26             |
| A_68_P30642144 | chr16:30510918-30510962                           | NM_172614:39724        | Tmem44        | DOWNSTREAM             | 0.116                                                        | 0.534                          | 2371.78            | 1267.35            | 0.062                          | 1918.45            | 119.23             |

| ProbeName      | Target position of probe on CpG island microarray | TargetID           | GeneSymbol | CpG island Description | Ratio of relative methylation (TiO <sub>2</sub> -NP/Vehicle) | Sham group                     |                    |                    | TiO <sub>2</sub> -H group      |                    |                    |
|----------------|---------------------------------------------------|--------------------|------------|------------------------|--------------------------------------------------------------|--------------------------------|--------------------|--------------------|--------------------------------|--------------------|--------------------|
|                |                                                   |                    |            |                        |                                                              | Relative methylation (Cy5/Cy3) | Cy3 signal (Input) | Cy5 signal (MeDIP) | Relative methylation (Cy5/Cy3) | Cy3 signal (Input) | Cy5 signal (MeDIP) |
| A_68_P30651594 | chr16:32247382-32247433                           | NM_026898:69       | Wdr53      | INSIDE                 | 0.116                                                        | 0.636                          | 2138.23            | 1359.01            | 0.074                          | 1626.32            | 119.77             |
| A_68_P26234304 | chr8:125100653-125100697                          | NM_009698:133      | Aprt       | INSIDE                 | 0.115                                                        | 0.744                          | 4203.02            | 3125.02            | 0.086                          | 3182.83            | 273.05             |
| A_68_P29523611 | chr14:34164707-34164753                           | NM_153800:134722   | Arhgap22   | INSIDE                 | 0.115                                                        | 1.439                          | 1301.16            | 1872.93            | 0.166                          | 902.64             | 149.45             |
| A_68_P28737547 | chr12:111517314-111517358                         | NM_172119:-103     | Dio3       | DIVERGENT_PROMOTER     | 0.115                                                        | 0.660                          | 1901.27            | 1254.57            | 0.076                          | 1540.42            | 116.86             |
| A_68_P31515593 | chr18:15223323-15223369                           | NM_001142731:-1255 | Kctd1      | PROMOTER               | 0.115                                                        | 0.542                          | 2658.26            | 1440.09            | 0.062                          | 1974.93            | 123.08             |
| A_68_P26815490 | chr9:108469907-108469951                          | NM_023247:-255     | Ndufa3     | DIVERGENT_PROMOTER     | 0.115                                                        | 0.441                          | 3490.45            | 1538.00            | 0.051                          | 2500.22            | 126.94             |
| A_68_P21421554 | chr2:91097131-91097175                            | NM_028733:-333     | Pacsin3    | PROMOTER               | 0.115                                                        | 0.629                          | 2507.47            | 1577.11            | 0.072                          | 1691.59            | 122.47             |
| A_68_P28072366 | chr11:101032330-101032374                         | NM_146030:264      | Plekhh3    | INSIDE                 | 0.115                                                        | 0.623                          | 4359.82            | 2716.47            | 0.072                          | 3095.40            | 221.70             |
| A_68_P23916648 | chr5:98615578-98615622                            | NM_029947:5713     | Prdm8      | INSIDE                 | 0.115                                                        | 1.436                          | 3010.13            | 4323.03            | 0.165                          | 2076.03            | 343.14             |
| A_68_P28451628 | chr12:56499606-56499653                           | NM_011968:-182     | Psmc6      | PROMOTER               | 0.115                                                        | 0.677                          | 2272.71            | 1538.34            | 0.078                          | 1774.29            | 138.57             |
| A_68_P32071916 | chr19:32830947-32830991                           | NM_008960:-1098    | Pten       | PROMOTER               | 0.115                                                        | 0.687                          | 5738.49            | 3942.91            | 0.079                          | 3993.79            | 314.99             |
| A_68_P28168284 | chr11:117829892-117829936                         | NM_007707:766      | Socs3      | INSIDE                 | 0.115                                                        | 0.673                          | 1956.73            | 1317.12            | 0.077                          | 1544.55            | 119.17             |
| A_68_P26002691 | chr8:83538819-83538865                            | NM_027554:-37      | Usp38      | PROMOTER               | 0.115                                                        | 0.544                          | 2694.02            | 1466.30            | 0.063                          | 2055.40            | 129.13             |
| A_68_P28753097 | chr12:114116011-114116055                         | AK018992:-2007     |            | PROMOTER               | 0.115                                                        | 0.637                          | 2557.43            | 1630.15            | 0.073                          | 1908.64            | 139.37             |
| A_68_P32321493 | chrX:34588727-34588771                            | NM_173779:-91      | Ankrd58    | PROMOTER               | 0.114                                                        | 1.501                          | 4199.39            | 6302.27            | 0.171                          | 1810.12            | 309.98             |
| A_68_P25542189 | chr7:140901181-140901225                          | NM_025392:187      | Bccip      | PROMOTER               | 0.114                                                        | 0.543                          | 2814.16            | 1527.67            | 0.062                          | 1986.22            | 123.34             |
| A_68_P23401328 | chr4:148961215-148961259                          | NM_023051:490      | Clstn1     | INSIDE                 | 0.114                                                        | 1.709                          | 9352.64            | 15982.37           | 0.195                          | 6029.65            | 1178.52            |
| A_68_P32651797 | chrX:126284617-126284662                          | NM_172493:362      | Diap2      | INSIDE                 | 0.114                                                        | 1.830                          | 1684.44            | 3083.15            | 0.209                          | 677.82             | 141.66             |
| A_68_P26893207 | chr9:123022692-123022739                          | NM_001081188:367   | Exosc7     | INSIDE                 | 0.114                                                        | 2.117                          | 1044.95            | 2211.92            | 0.242                          | 763.78             | 184.76             |
| A_68_P32779374 | chrX:156828817-156828861                          | NM_001079847:217   | Gpr64      | INSIDE                 | 0.114                                                        | 1.648                          | 1878.78            | 3095.79            | 0.189                          | 749.51             | 141.29             |
| A_68_P22907353 | chr4:49858612-49858656                            | NM_001033351:-681  | Grin3a     | PROMOTER               | 0.114                                                        | 0.735                          | 3348.02            | 2460.06            | 0.084                          | 2248.59            | 188.77             |
| A_68_P31259555 | chr17:57150392-57150436                           | NM_133801:297      | Gtf2f1     | INSIDE                 | 0.114                                                        | 0.510                          | 2824.94            | 1442.11            | 0.058                          | 2016.32            | 117.47             |
| A_68_P24449402 | chr6:52196249-52196297                            | NM_010450:-506     | Hoxa11     | PROMOTER               | 0.114                                                        | 0.715                          | 2020.02            | 1443.81            | 0.081                          | 1473.78            | 119.83             |
| A_68_P26375207 | chr9:27107032-27107084                            | NM_001033323:246   | Igfbp9     | INSIDE                 | 0.114                                                        | 0.563                          | 2596.28            | 1460.71            | 0.064                          | 1879.35            | 120.86             |
| A_68_P24152254 | chr5:143026387-143026435                          | NM_178702:621      | Radil      | INSIDE                 | 0.114                                                        | 1.559                          | 2185.39            | 3406.71            | 0.178                          | 1407.95            | 250.40             |
| A_68_P27096532 | chr10:42482055-42482099                           | NM_153055:775      | Sec63      | INSIDE                 | 0.114                                                        | 1.824                          | 10066.38           | 18363.01           | 0.207                          | 6271.40            | 1298.66            |
| A_68_P26316370 | chr9:14080581-14080626                            | NM_030261:-141     | Sesn3      | PROMOTER               | 0.114                                                        | 0.604                          | 2863.27            | 1729.16            | 0.069                          | 1960.62            | 135.26             |
| A_68_P21395068 | chr2:84706724-84706775                            | NM_001083809:25967 | Slc43a1    | DOWNSTREAM             | 0.114                                                        | 0.673                          | 2322.84            | 1563.25            | 0.077                          | 1539.46            | 117.95             |
| A_68_P24118744 | chr5:136438405-136438449                          | NM_001160366:11920 | Srerb4d    | INSIDE                 | 0.114                                                        | 0.543                          | 3947.13            | 2142.47            | 0.062                          | 2645.93            | 163.34             |
| A_68_P31932349 | chr19:6047162-6047206                             | NM_001164709:40    | Syvn1      | INSIDE                 | 0.114                                                        | 0.633                          | 1976.36            | 1251.08            | 0.072                          | 1616.46            | 116.79             |
| A_68_P22336394 | chr3:93247847-93247891                            | NM_001163098:1617  | Tchh       | INSIDE                 | 0.114                                                        | 0.530                          | 2607.52            | 1382.63            | 0.060                          | 1967.41            | 118.88             |
| A_68_P30374035 | chr15:80541596-80541640                           | NM_144812:-124     | Tnrc6b     | PROMOTER               | 0.114                                                        | 0.595                          | 2247.59            | 1336.71            | 0.068                          | 1723.90            | 117.03             |
| A_68_P22982497 | chr4:65265989-65266033                            | NM_001161782:-9    | Trim32     | PROMOTER               | 0.114                                                        | 0.610                          | 2629.47            | 1605.00            | 0.070                          | 1876.15            | 130.92             |
| A_68_P25747454 | chr8:30329630-30329674                            | NM_153135:456      | Unc5d      | INSIDE                 | 0.114                                                        | 0.658                          | 2688.28            | 1768.87            | 0.075                          | 1939.09            | 145.04             |
| A_68_P32567807 | chrX:99447270-99447325                            | NM_007709:-189     | Cited1     | PROMOTER               | 0.113                                                        | 1.565                          | 1595.09            | 2496.11            | 0.177                          | 687.09             | 121.34             |
| A_68_P20352842 | chr1:75233266-75233310                            | NM_001159885:12    | Dnajb2     | INSIDE                 | 0.113                                                        | 0.677                          | 2053.90            | 1391.18            | 0.077                          | 1505.54            | 115.35             |
| A_68_P22317214 | chr3:88905621-88905667                            | NM_134469:223      | Fdps       | INSIDE                 | 0.113                                                        | 0.705                          | 2236.03            | 1576.61            | 0.080                          | 1667.48            | 133.43             |
| A_68_P24225086 | chr6:8209405-8209449                              | NR_033518:139      | Gm16039    | INSIDE                 | 0.113                                                        | 0.622                          | 5268.18            | 3276.99            | 0.070                          | 3832.71            | 268.46             |
| A_68_P32241078 | chrX:7525375-7525419                              | NM_001130416:-381  | Hdac6      | PROMOTER               | 0.113                                                        | 1.621                          | 1528.19            | 2476.52            | 0.183                          | 636.95             | 116.45             |
| A_68_P22920589 | chr4:53024957-53025001                            | NM_025623:183      | Nipsnap3b  | INSIDE                 | 0.113                                                        | 1.672                          | 4718.76            | 7888.37            | 0.190                          | 3202.14            | 607.07             |
| A_68_P22920590 | chr4:53025131-53025175                            | NM_025623:357      | Nipsnap3b  | INSIDE                 | 0.113                                                        | 1.461                          | 10345.19           | 15116.54           | 0.166                          | 6698.52            | 1109.63            |
| A_68_P32672689 | chrX:131120700-131120748                          | NM_019865:532      | Rpl36a     | INSIDE                 | 0.113                                                        | 1.830                          | 1594.58            | 2918.44            | 0.206                          | 565.96             | 116.71             |
| A_68_P22970869 | chr4:63155665-63155709                            | NM_001008791:1299  | Whrn       | INSIDE                 | 0.113                                                        | 0.742                          | 3050.37            | 2264.25            | 0.084                          | 2223.68            | 186.60             |
| A_68_P32578102 | chrX:101865933-101865986                          | NM_175358:444      | Zdhc15     | INSIDE                 | 0.113                                                        | 1.649                          | 1438.59            | 2372.71            | 0.187                          | 669.18             | 125.04             |
| A_68_P21112313 | chr2:31806031-31806075                            | NM_145144:230      | Aif1l      | INSIDE                 | 0.112                                                        | 0.736                          | 2051.78            | 1509.51            | 0.082                          | 1448.79            | 119.03             |
| A_68_P28727042 | chr12:109514039-109514083                         | NM_001159910:-433  | Ccdc85c    | PROMOTER               | 0.112                                                        | 0.683                          | 2271.74            | 1550.90            | 0.077                          | 1539.47            | 118.17             |
| A_68_P32351253 | chrX:42143286-42143330                            | NM_001190718:30    | Deaf12l1   | INSIDE                 | 0.112                                                        | 1.381                          | 1695.79            | 2341.11            | 0.155                          | 744.88             | 115.23             |
| A_68_P32241075 | chrX:7525044-7525088                              | NM_001130416:-51   | Hdac6      | PROMOTER               | 0.112                                                        | 2.703                          | 4241.32            | 11465.94           | 0.303                          | 1528.29            | 462.44             |
| A_68_P28058585 | chr11:98656131-98656175                           | NM_028722:-930     | Msl1       | PROMOTER               | 0.112                                                        | 0.556                          | 2952.96            | 1640.98            | 0.062                          | 2016.57            | 125.79             |
| A_68_P21834485 | chr2:167066151-167066195                          | NM_008968:-135     | Ptgis      | PROMOTER               | 0.112                                                        | 1.544                          | 7613.76            | 11758.96           | 0.174                          | 5179.26            | 899.08             |
| A_68_P24991727 | chr7:19735291-19735345                            | NM_026943:132      | Snrpd2     | INSIDE                 | 0.112                                                        | 0.687                          | 1994.22            | 1370.38            | 0.077                          | 1564.65            | 120.20             |

| ProbeName      | Target position of probe on CpG island microarray | TargetID                | GeneSymbol    | CpG island Description | Ratio of relative methylation (TiO <sub>2</sub> -NP/Vehicle) | Sham group                     |                    |                    | TiO <sub>2</sub> -H group      |                    |                    |
|----------------|---------------------------------------------------|-------------------------|---------------|------------------------|--------------------------------------------------------------|--------------------------------|--------------------|--------------------|--------------------------------|--------------------|--------------------|
|                |                                                   |                         |               |                        |                                                              | Relative methylation (Cy5/Cy3) | Cy3 signal (Input) | Cy5 signal (MeDIP) | Relative methylation (Cy5/Cy3) | Cy3 signal (Input) | Cy5 signal (MeDIP) |
| A_68_P29218722 | chr13:91600765-91600809                           | NM_024186:85            | Ssbp2         | INSIDE                 | 0.112                                                        | 0.614                          | 3203.40            | 1967.63            | 0.069                          | 2229.34            | 153.62             |
| A_68_P28031420 | chr11:94072519-94072563                           | NM_009427:-227          | Tob1          | PROMOTER               | 0.112                                                        | 0.690                          | 1945.63            | 1342.85            | 0.077                          | 1587.01            | 122.52             |
| A_68_P26024222 | chr8:87823113-87823157                            | NM_022997:262           | Vps35         | INSIDE                 | 0.112                                                        | 0.527                          | 3767.11            | 1984.30            | 0.059                          | 2728.73            | 161.17             |
| A_68_P24735177 | chr6:108618758-108618808                          | NM_011498:8160          | Bhlhe40       | DOWNSTREAM             | 0.111                                                        | 1.624                          | 1047.87            | 1701.79            | 0.180                          | 808.09             | 145.76             |
| A_68_P22407674 | chr3:107434063-107434109                          | NM_153563:542           | Fam40a        | INSIDE                 | 0.111                                                        | 1.436                          | 1752.13            | 2516.68            | 0.159                          | 1311.00            | 208.60             |
| A_68_P31150130 | chr17:33822156-33822206                           | NM_001109913:223        | Hnrmpm        | INSIDE                 | 0.111                                                        | 0.476                          | 3140.60            | 1495.74            | 0.053                          | 2380.94            | 125.45             |
| A_68_P32767188 | chrX:154035988-154036043                          | NM_172307:632           | Mbtps2        | INSIDE                 | 0.111                                                        | 1.744                          | 1575.08            | 2746.45            | 0.194                          | 594.09             | 115.24             |
| A_68_P32242263 | chrX:7783783-7783827                              | NM_016913:-153          | Porcn         | PROMOTER               | 0.111                                                        | 1.546                          | 2695.29            | 4165.80            | 0.172                          | 1037.07            | 178.63             |
| A_68_P23196701 | chr4:108251917-108251961                          | NM_172697:3             | Prpf38a       | INSIDE                 | 0.111                                                        | 0.589                          | 2768.15            | 1630.15            | 0.065                          | 2036.75            | 133.26             |
| A_68_P30330337 | chr15:73253106-73253150                           | NM_007982:493           | Ptk2          | INSIDE                 | 0.111                                                        | 0.566                          | 5635.53            | 3191.39            | 0.063                          | 4147.93            | 259.69             |
| A_68_P32709179 | chrX:139116571-139116615                          | NM_001199360:324        | Tmem164       | INSIDE                 | 0.111                                                        | 3.814                          | 3928.28            | 14980.50           | 0.421                          | 1741.08            | 733.83             |
| A_68_P20405967 | chr1:84835781-84835825                            | NM_133975:77            | Trip12        | INSIDE                 | 0.111                                                        | 0.583                          | 2472.51            | 1442.66            | 0.065                          | 1833.90            | 118.44             |
| A_68_P25082976 | chr7:50817634-50817683                            | NM_001008549:-81        | Zfp658        | PROMOTER               | 0.111                                                        | 0.621                          | 2416.77            | 1500.29            | 0.069                          | 1777.42            | 122.54             |
| A_68_P25376019 | chr7:109054202-109054254                          | NM_025605:-122          | 2400001E08Rik | PROMOTER               | 0.110                                                        | 0.718                          | 2195.53            | 1577.26            | 0.079                          | 1625.39            | 128.69             |
| A_68_P31111775 | chr17:26813633-26813677                           | NM_025272:314           | Atp6v0e       | INSIDE                 | 0.110                                                        | 0.490                          | 2647.43            | 1298.45            | 0.054                          | 2132.37            | 114.84             |
| A_68_P25047606 | chr7:35903706-35903750                            | NM_007678:-583          | Cebpa         | PROMOTER               | 0.110                                                        | 0.681                          | 2602.76            | 1772.23            | 0.075                          | 1633.83            | 122.82             |
| A_68_P24607363 | chr6:85911171-85911215                            | NM_028099:469           | Dusp11        | INSIDE                 | 0.110                                                        | 0.562                          | 2551.77            | 1433.52            | 0.062                          | 1891.29            | 116.92             |
| A_68_P28043946 | chr11:96205491-96205535                           | NM_010458:430           | Hoxb3         | INSIDE                 | 0.110                                                        | 0.493                          | 2866.05            | 1411.73            | 0.054                          | 2193.26            | 118.74             |
| A_68_P32539359 | chrX:91786297-91786345                            | NM_019791:1093          | Maged1        | INSIDE                 | 0.110                                                        | 2.611                          | 1501.58            | 3920.54            | 0.287                          | 566.67             | 162.83             |
| A_68_P30497296 | chr15:102162515-102162559                         | NM_021713:397           | Myg1          | INSIDE                 | 0.110                                                        | 0.703                          | 2397.05            | 1684.13            | 0.078                          | 1472.60            | 114.29             |
| A_68_P30421714 | chr15:88692421-88692465                           | NM_145478:-181          | Pim3          | PROMOTER               | 0.110                                                        | 0.545                          | 3841.18            | 2094.99            | 0.060                          | 2759.09            | 165.65             |
| A_68_P32071912 | chr19:32830438-32830489                           | NM_008960:-1603         | Pten          | PROMOTER               | 0.110                                                        | 0.509                          | 2568.07            | 1306.01            | 0.056                          | 2138.97            | 120.13             |
| A_68_P24537772 | chr6:71657975-71658019                            | NM_178608:322           | Reep1         | INSIDE                 | 0.110                                                        | 0.506                          | 2540.77            | 1285.70            | 0.056                          | 2130.18            | 119.01             |
| A_68_P21835857 | chr2:167329794-167329838                          | NM_030743:11672         | Rnf114        | INSIDE                 | 0.110                                                        | 0.551                          | 2461.40            | 1355.01            | 0.061                          | 1908.26            | 115.58             |
| A_68_P29676509 | chr14:66572807-66572857                           | NM_172604:-251          | Scara3        | PROMOTER               | 0.110                                                        | 1.425                          | 1005.72            | 1433.29            | 0.156                          | 762.96             | 119.34             |
| A_68_P27468586 | chr10:114688584-114688628                         | NM_025706:-57           | Tbc1d15       | PROMOTER               | 0.110                                                        | 1.338                          | 3399.19            | 4547.68            | 0.147                          | 2431.45            | 357.55             |
| A_68_P24993673 | chr7:20094233-20094277                            | NM_025960:177           | Trappc6a      | INSIDE                 | 0.110                                                        | 0.688                          | 2221.60            | 1528.73            | 0.076                          | 1595.84            | 121.13             |
| A_68_P25411546 | chr7:117205275-117205334                          | NM_009281:89            | Zfp143        | INSIDE                 | 0.110                                                        | 2.701                          | 481.41             | 1300.06            | 0.298                          | 390.63             | 116.42             |
| A_68_P24336405 | chr6:31166095-31166146                            | ENSMUST00000115107:2313 |               | INSIDE                 | 0.110                                                        | 1.661                          | 774.84             | 1286.79            | 0.183                          | 627.01             | 114.90             |
| A_68_P25693341 | chr8:17534942-17534988                            | NM_053171:421           | Csmd1         | INSIDE                 | 0.109                                                        | 0.534                          | 3144.37            | 1680.06            | 0.058                          | 2141.23            | 124.73             |
| A_68_P32746468 | chrX:148238435-148238479                          | NM_021523:632           | Huwe1         | INSIDE                 | 0.109                                                        | 2.829                          | 3242.16            | 9171.33            | 0.309                          | 1114.26            | 343.91             |
| A_68_P27327919 | chr10:88349039-88349083                           | NM_145423:324           | Sle5a8        | INSIDE                 | 0.109                                                        | 0.716                          | 4081.81            | 2921.07            | 0.078                          | 3003.97            | 234.05             |
| A_68_P29855894 | chr14:102008105-102008149                         | NM_001081278:282        | Tbc1d4        | INSIDE                 | 0.109                                                        | 0.544                          | 2654.64            | 1444.88            | 0.059                          | 2059.87            | 121.67             |
| A_68_P32340126 | chrX:39264963-39265012                            | NM_001033422:91         | Thoc2         | INSIDE                 | 0.109                                                        | 3.117                          | 2622.57            | 8173.43            | 0.341                          | 866.85             | 295.27             |
| A_68_P26584999 | chr9:64808747-64808792                            | NM_175153:26            | 2010321M09Rik | INSIDE                 | 0.108                                                        | 1.509                          | 6771.50            | 10220.88           | 0.163                          | 4637.15            | 755.05             |
| A_68_P23961361 | chr5:106887861-106887906                          | NM_001005477:-698       | Barhl2        | PROMOTER               | 0.108                                                        | 0.687                          | 2747.15            | 1888.55            | 0.074                          | 2022.23            | 149.99             |
| A_68_P24397655 | chr6:42274146-42274190                            | NM_001113327:471        | Fam131b       | INSIDE                 | 0.108                                                        | 0.546                          | 3761.64            | 2052.52            | 0.059                          | 2354.77            | 138.42             |
| A_68_P32683850 | chrX:133583924-133583968                          | NM_146261:-186          | Fam199x       | PROMOTER               | 0.108                                                        | 1.697                          | 1612.97            | 2736.65            | 0.183                          | 817.88             | 149.56             |
| A_68_P20332289 | chr1:71699909-71699953                            | NM_010233:-185          | Fn1           | PROMOTER               | 0.108                                                        | 0.569                          | 2794.25            | 1591.26            | 0.061                          | 1927.05            | 118.48             |
| A_68_P24656010 | chr6:94234328-94234372                            | NM_001029850:-452       | Magi1         | PROMOTER               | 0.108                                                        | 0.583                          | 2365.89            | 1378.76            | 0.063                          | 1820.99            | 114.56             |
| A_68_P25503658 | chr7:134170789-134170833                          | NM_010772:-817          | Maz           | PROMOTER               | 0.108                                                        | 2.170                          | 20497.19           | 44486.13           | 0.235                          | 12606.55           | 2958.09            |
| A_68_P27941848 | chr11:78002243-78002287                           | NM_033475:15            | Rab34         | INSIDE                 | 0.108                                                        | 0.606                          | 2856.48            | 1729.90            | 0.065                          | 2086.50            | 136.39             |
| A_68_P31598893 | chr18:31794423-31794469                           | NM_172965:410           | Sap130        | INSIDE                 | 0.108                                                        | 0.710                          | 2044.22            | 1450.72            | 0.076                          | 1568.02            | 119.73             |
| A_68_P32259721 | chrX:11576312-11576356                            |                         | Unknown       | Unknown                | 0.108                                                        | 0.655                          | 4226.51            | 2767.07            | 0.071                          | 1637.93            | 115.49             |
| A_68_P26897419 | A_68_P26897419                                    |                         | Unknown       | Unknown                | 0.108                                                        | 0.731                          | 2083.64            | 1523.00            | 0.079                          | 1455.43            | 115.21             |
| A_68_P32710881 | chrX:139400366-139400410                          | NM_019496:883           | Ammecr1       | INSIDE                 | 0.107                                                        | 2.310                          | 1482.67            | 3425.50            | 0.246                          | 578.71             | 142.39             |
| A_68_P29234318 | chr13:95128761-95128805                           | NM_009680:-132          | Ap3b1         | PROMOTER               | 0.107                                                        | 0.733                          | 2427.48            | 1778.62            | 0.078                          | 1583.23            | 124.13             |
| A_68_P23797908 | chr5:73882402-73882446                            | NM_001190733:160        | Deun1d4       | INSIDE                 | 0.107                                                        | 0.495                          | 3141.07            | 1554.79            | 0.053                          | 2306.55            | 121.67             |
| A_68_P24126716 | chr5:138070623-138070667                          | NM_001168652:294        | Lrch4         | INSIDE                 | 0.107                                                        | 0.690                          | 2647.20            | 1825.83            | 0.074                          | 1832.18            | 135.32             |
| A_68_P28480019 | chr12:62623999-62624043                           | NM_178714:-1598         | Lrfn5         | PROMOTER               | 0.107                                                        | 0.697                          | 2153.58            | 1500.76            | 0.075                          | 1554.05            | 116.10             |
| A_68_P30267534 | chr15:61819131-61819181                           | NM_001177352:2261       | Myc           | INSIDE                 | 0.107                                                        | 0.618                          | 2362.38            | 1461.03            | 0.066                          | 1787.71            | 117.95             |

| ProbeName      | Target position of probe on CpG island microarray | TargetID               | GeneSymbol    | CpG island Description | Ratio of relative methylation (TiO <sub>2</sub> -NP/Vehicle) | Sham group                     |                    |                    | TiO <sub>2</sub> -H group      |                    |                    |
|----------------|---------------------------------------------------|------------------------|---------------|------------------------|--------------------------------------------------------------|--------------------------------|--------------------|--------------------|--------------------------------|--------------------|--------------------|
|                |                                                   |                        |               |                        |                                                              | Relative methylation (Cy5/Cy3) | Cy3 signal (Input) | Cy5 signal (MeDIP) | Relative methylation (Cy5/Cy3) | Cy3 signal (Input) | Cy5 signal (MeDIP) |
| A_68_P20454941 | chr1:95239500-95239544                            | NM_080850:-157         | Pask          | DIVERGENT_PROMOTER     | 0.107                                                        | 0.473                          | 3446.19            | 1631.35            | 0.050                          | 2631.85            | 132.78             |
| A_68_P22878640 | chr4:44716235-44716287                            | NM_008782:7052         | Pax5          | INSIDE                 | 0.107                                                        | 0.735                          | 2237.57            | 1644.59            | 0.079                          | 1541.99            | 121.19             |
| A_68_P28009091 | chr1:89864227-89864271                            | NM_008796:-40          | Pctp          | PROMOTER               | 0.107                                                        | 1.961                          | 1527.77            | 2996.19            | 0.210                          | 1137.92            | 239.47             |
| A_68_P22957025 | chr4:59561479-59561533                            | NM_144904:730          | Rod1          | INSIDE                 | 0.107                                                        | 0.559                          | 2486.69            | 1389.22            | 0.060                          | 1947.88            | 116.26             |
| A_68_P29937481 | chr14:118635351-118635395                         | NM_177753:880          | Sox21         | INSIDE                 | 0.107                                                        | 1.819                          | 962.28             | 1750.05            | 0.194                          | 699.66             | 135.63             |
| A_68_P28167195 | chr11:117644840-117644884                         | NM_001195088:891       | Tmc8          | INSIDE                 | 0.107                                                        | 1.657                          | 2818.32            | 4670.59            | 0.178                          | 1961.96            | 348.37             |
| A_68_P31202521 | chr17:45822303-45822347                           | NM_198167:843          | Tmem63b       | INSIDE                 | 0.107                                                        | 0.597                          | 3648.58            | 2178.39            | 0.064                          | 2543.60            | 161.86             |
| A_68_P28599059 | chr12:85910912-85910956                           | NM_007701:133          | Vsx2          | INSIDE                 | 0.107                                                        | 0.642                          | 4496.75            | 2888.33            | 0.069                          | 3263.32            | 223.78             |
| A_68_P28833741 | chr13:12794586-12794630                           | ENSMUST00000104944:-20 |               | PROMOTER               | 0.107                                                        | 0.744                          | 3122.49            | 2322.11            | 0.080                          | 2339.54            | 186.13             |
| A_68_P22609954 | chr3:145312413-145312457                          | NM_010516:515          | Cyr61         | INSIDE                 | 0.106                                                        | 0.509                          | 3045.06            | 1549.09            | 0.054                          | 2202.75            | 119.22             |
| A_68_P26467020 | chr9:44135161-44135205                            | NM_007875:255          | Dpagt1        | INSIDE                 | 0.106                                                        | 0.571                          | 2939.59            | 1679.83            | 0.061                          | 1893.04            | 114.95             |
| A_68_P21909705 | chr2:181022801-181022845                          | NM_198169:-151         | Gmeb2         | PROMOTER               | 0.106                                                        | 0.667                          | 2462.12            | 1641.71            | 0.070                          | 1723.44            | 121.47             |
| A_68_P27279736 | chr10:79384102-79384146                           | NM_053244:4409         | Kiss1r        | INSIDE                 | 0.106                                                        | 0.654                          | 2489.30            | 1627.83            | 0.069                          | 1728.67            | 119.93             |
| A_68_P31757530 | chr18:61558577-61558621                           | NM_133249:1487         | Ppargc1b      | INSIDE                 | 0.106                                                        | 0.699                          | 3221.43            | 2251.85            | 0.074                          | 2165.58            | 160.16             |
| A_68_P21783954 | chr2:158439815-158439861                          | NM_009508:3345         | Slc32a1       | INSIDE                 | 0.106                                                        | 0.599                          | 2771.22            | 1658.63            | 0.063                          | 1913.30            | 121.06             |
| A_68_P24605102 | chr6:85402096-85402141                            | NR_028081:-154         |               | PROMOTER               | 0.105                                                        | 0.516                          | 2808.24            | 1449.38            | 0.054                          | 2203.86            | 119.42             |
| A_68_P24127313 | chr5:138182525-138182569                          | NM_175521:-1320        | 6430598A04Rik | DIVERGENT_PROMOTER     | 0.105                                                        | 1.887                          | 6790.45            | 12814.33           | 0.198                          | 4405.83            | 874.09             |
| A_68_P31217295 | chr17:48549255-48549304                           | NM_207219:-125         | AI314976      | DIVERGENT_PROMOTER     | 0.105                                                        | 0.542                          | 4840.56            | 2622.58            | 0.057                          | 3366.25            | 191.33             |
| A_68_P30213285 | chr15:51696567-51696616                           | NM_080635:416          | Eif3h         | INSIDE                 | 0.105                                                        | 1.622                          | 1322.73            | 2145.54            | 0.170                          | 941.63             | 160.24             |
| A_68_P21114435 | chr2:32143977-32144021                            | NM_001080968:226       | Golga2        | INSIDE                 | 0.105                                                        | 0.725                          | 2305.50            | 1670.42            | 0.076                          | 1647.98            | 125.77             |
| A_68_P26550024 | chr9:58670000-58670044                            | NM_001081192:-1296     | Hen4          | PROMOTER               | 0.105                                                        | 0.624                          | 2513.84            | 1568.23            | 0.066                          | 1872.85            | 123.09             |
| A_68_P31515592 | chr18:15223215-15223266                           | NM_001142731:-1149     | Ketd1         | PROMOTER               | 0.105                                                        | 0.588                          | 2969.77            | 1746.58            | 0.061                          | 1962.40            | 120.61             |
| A_68_P26821068 | chr9:109835124-109835175                          | NM_001205331:872       | Mtap4         | INSIDE                 | 0.105                                                        | 0.690                          | 2234.59            | 1541.09            | 0.072                          | 1615.81            | 116.74             |
| A_68_P27970616 | chr11:83112191-83112235                           | NM_134025:267          | Pex12         | INSIDE                 | 0.105                                                        | 0.507                          | 2952.27            | 1498.13            | 0.053                          | 2221.79            | 118.43             |
| A_68_P28078648 | chr11:102145969-102146013                         | NM_028076:-284         | Tmub2         | PROMOTER               | 0.105                                                        | 0.621                          | 5025.74            | 3119.72            | 0.065                          | 3714.55            | 241.90             |
| A_68_P26538536 | chr9:56644194-56644238                            | AK155716:4852          |               | DOWNSTREAM             | 0.105                                                        | 0.702                          | 5323.81            | 3736.92            | 0.073                          | 3877.86            | 284.82             |
| A_68_P23296722 | chr4:129138895-129138941                          | NM_133889:-4           | Bsdc1         | PROMOTER               | 0.104                                                        | 2.164                          | 3236.95            | 7003.60            | 0.224                          | 2243.55            | 503.07             |
| A_68_P24772854 | chr6:115724644-115724688                          | NM_025958:92           | Cand2         | INSIDE                 | 0.104                                                        | 1.742                          | 3122.07            | 5438.23            | 0.182                          | 2126.47            | 386.65             |
| A_68_P26591487 | chr9:66006201-66006245                            | NM_010019:190          | Dapk2         | INSIDE                 | 0.104                                                        | 0.727                          | 2279.42            | 1657.08            | 0.076                          | 1592.45            | 120.73             |
| A_68_P23363213 | chr4:140857120-140857165                          | NM_010139:-12          | Epha2         | PROMOTER               | 0.104                                                        | 1.529                          | 967.41             | 1478.91            | 0.159                          | 724.37             | 115.36             |
| A_68_P21727905 | chr2:147870580-147870624                          | NM_010446:2103         | Foxa2         | INSIDE                 | 0.104                                                        | 0.662                          | 8649.96            | 5730.24            | 0.069                          | 6086.19            | 419.37             |
| A_68_P31545967 | chr18:21811707-21811752                           | NM_001081403:-860      | Klhl14        | PROMOTER               | 0.104                                                        | 1.613                          | 3155.93            | 5091.46            | 0.168                          | 2050.86            | 344.17             |
| A_68_P24591351 | chr6:83036388-83036432                            | NM_010692:52           | Lbx2          | INSIDE                 | 0.104                                                        | 0.672                          | 2691.68            | 1809.04            | 0.070                          | 1704.80            | 119.69             |
| A_68_P30368844 | chr15:79664362-79664415                           | NM_001013360:375       | Nped          | INSIDE                 | 0.104                                                        | 1.771                          | 891.14             | 1578.34            | 0.184                          | 635.42             | 116.64             |
| A_68_P25771679 | chr8:35040712-35040756                            | NM_001042674:-421      | Rbpms         | PROMOTER               | 0.104                                                        | 0.673                          | 2574.00            | 1732.31            | 0.070                          | 1861.78            | 130.03             |
| A_68_P32078821 | chr19:34266845-34266890                           | NM_029682:108          | Stambp11      | INSIDE                 | 0.104                                                        | 2.001                          | 2573.12            | 5149.74            | 0.208                          | 1651.50            | 343.86             |
| A_68_P24818152 | chr6:124958758-124958812                          | NM_175557:-1038        | Zfp384        | PROMOTER               | 0.104                                                        | 0.621                          | 2468.36            | 1533.90            | 0.065                          | 1888.64            | 122.54             |
| A_68_P26085411 | chr8:98330678-98330722                            | NR_015574:-29          | 4930513N10Rik | PROMOTER               | 0.103                                                        | 0.695                          | 7015.31            | 4878.62            | 0.071                          | 4904.43            | 350.38             |
| A_68_P26065129 | chr8:94880803-94880847                            | NR_033641:-805         | 4933436C20Rik | DIVERGENT_PROMOTER     | 0.103                                                        | 0.628                          | 2822.65            | 1772.14            | 0.065                          | 1886.33            | 122.16             |
| A_68_P20350884 | chr1:74902743-74902787                            | NM_009872:1162         | Cdk5r2        | INSIDE                 | 0.103                                                        | 0.618                          | 2538.87            | 1568.75            | 0.064                          | 1872.97            | 119.36             |
| A_68_P25737431 | chr8:28371155-28371199                            | NM_007918:378          | Eif4ebp1      | INSIDE                 | 0.103                                                        | 0.601                          | 2545.81            | 1529.03            | 0.062                          | 1846.76            | 114.75             |
| A_68_P32467039 | chrX:71491630-71491682                            | NM_010227:217          | Flna          | INSIDE                 | 0.103                                                        | 1.642                          | 2153.63            | 3535.33            | 0.168                          | 716.93             | 120.63             |
| A_68_P29055022 | chr13:55546184-55546228                           | NM_011938:-488         | Grk6          | PROMOTER               | 0.103                                                        | 0.639                          | 2723.94            | 1741.07            | 0.066                          | 1913.17            | 125.93             |
| A_68_P25005383 | chr7:25316968-25317015                            | NM_153134:1325         | Irgq          | INSIDE                 | 0.103                                                        | 0.685                          | 2313.36            | 1585.67            | 0.070                          | 1710.32            | 120.50             |
| A_68_P29624050 | chr14:57287581-57287630                           | NM_023773:521          | Mphosph8      | INSIDE                 | 0.103                                                        | 1.468                          | 1563.36            | 2294.48            | 0.151                          | 1049.13            | 158.53             |
| A_68_P26642806 | chr9:75079725-75079769                            | NM_001081322:-74       | Myo5c         | PROMOTER               | 0.103                                                        | 0.649                          | 2333.40            | 1513.45            | 0.067                          | 1800.68            | 120.28             |
| A_68_P21006480 | chr2:11423558-11423602                            | NM_001177752:137       | Pfkfb3        | INSIDE                 | 0.103                                                        | 0.622                          | 2601.96            | 1619.63            | 0.064                          | 1816.90            | 116.65             |
| A_68_P26554815 | chr9:59528234-59528278                            | NM_011099:23842        | Pkm2          | DOWNSTREAM             | 0.103                                                        | 0.582                          | 2631.43            | 1531.54            | 0.060                          | 1948.29            | 117.21             |
| A_68_P23592737 | chr5:34512192-34512236                            | NM_181857:-117         | Poln          | PROMOTER               | 0.103                                                        | 0.682                          | 7047.68            | 4804.10            | 0.070                          | 4710.00            | 330.17             |
| A_68_P21217119 | chr2:51928961-51929008                            | NM_175238:628          | Rif1          | INSIDE                 | 0.103                                                        | 3.352                          | 1710.96            | 5735.83            | 0.345                          | 897.51             | 309.75             |
| A_68_P27675734 | chr11:29592809-29592856                           | NM_194052:-65          | Rtn4          | PROMOTER               | 0.103                                                        | 1.871                          | 969.72             | 1814.44            | 0.194                          | 622.03             | 120.41             |

| ProbeName      | Target position of probe on CpG island microarray | TargetID          | GeneSymbol    | CpG island Description | Ratio of relative methylation (TiO <sub>2</sub> -NP/Vehicle) | Sham group                     |                    |                    | TiO <sub>2</sub> -H group      |                    |                    |
|----------------|---------------------------------------------------|-------------------|---------------|------------------------|--------------------------------------------------------------|--------------------------------|--------------------|--------------------|--------------------------------|--------------------|--------------------|
|                |                                                   |                   |               |                        |                                                              | Relative methylation (Cy5/Cy3) | Cy3 signal (Input) | Cy5 signal (MeDIP) | Relative methylation (Cy5/Cy3) | Cy3 signal (Input) | Cy5 signal (MeDIP) |
| A_68_P30160402 | chr15:40487224-40487274                           | NM_011766:661     | Zfpm2         | INSIDE                 | 0.103                                                        | 0.733                          | 2682.53            | 1967.08            | 0.075                          | 1773.98            | 133.72             |
| A_68_P30959868 | chr16:90934441-90934485                           | NM_026502:632     | 1110004E09Rik | INSIDE                 | 0.102                                                        | 1.625                          | 2187.27            | 3554.32            | 0.166                          | 1532.00            | 254.74             |
| A_68_P24127047 | chr5:138126002-138126046                          | NM_145566:-103    | Agfig2        | PROMOTER               | 0.102                                                        | 0.612                          | 2730.81            | 1672.50            | 0.063                          | 1991.80            | 124.89             |
| A_68_P25708993 | chr8:23171282-23171328                            | NM_183142:113     | Alg11         | INSIDE                 | 0.102                                                        | 0.617                          | 2628.99            | 1622.12            | 0.063                          | 1888.49            | 118.64             |
| A_68_P21007908 | chr2:11699545-11699589                            | NM_177268:187     | Ankrd16       | INSIDE                 | 0.102                                                        | 0.663                          | 2470.87            | 1638.24            | 0.067                          | 1759.34            | 118.59             |
| A_68_P29575959 | chr14:47007992-47008036                           | NM_007554:2260    | Bmp4          | INSIDE                 | 0.102                                                        | 0.743                          | 2711.94            | 2014.71            | 0.076                          | 1957.06            | 148.65             |
| A_68_P25693339 | chr8:17534712-17534756                            | NM_053171:651     | Csm1          | INSIDE                 | 0.102                                                        | 0.565                          | 4990.32            | 2818.22            | 0.057                          | 3377.19            | 194.11             |
| A_68_P21732684 | chr2:148701174-148701218                          | NM_009976:8       | Cst3          | INSIDE                 | 0.102                                                        | 0.467                          | 3411.58            | 1592.02            | 0.047                          | 2577.17            | 122.17             |
| A_68_P23226804 | chr4:115612306-115612352                          | NM_001025567:203  | Dmbx1         | INSIDE                 | 0.102                                                        | 1.420                          | 1220.94            | 1733.19            | 0.145                          | 802.38             | 116.35             |
| A_68_P28198624 | chr12:4082843-4082887                             | NM_153082:291     | Dnajc27       | INSIDE                 | 0.102                                                        | 0.597                          | 6184.51            | 3691.19            | 0.061                          | 4158.08            | 253.91             |
| A_68_P27677356 | chr11:29924368-29924417                           | NM_146016:1641    | Eml6          | INSIDE                 | 0.102                                                        | 2.039                          | 835.83             | 1704.43            | 0.208                          | 598.55             | 124.56             |
| A_68_P25260795 | chr7:86537392-86537436                            | NM_145946:191     | Fanci         | INSIDE                 | 0.102                                                        | 0.594                          | 2596.27            | 1541.64            | 0.060                          | 1943.83            | 117.34             |
| A_68_P22010771 | chr3:27271350-27271394                            | NM_177330:1100    | Ghsr          | INSIDE                 | 0.102                                                        | 0.673                          | 3318.83            | 2235.15            | 0.069                          | 2148.80            | 147.41             |
| A_68_P30500862 | chr15:102773465-102773509                         | NM_010463:6203    | Hoxc12        | DOWNSTREAM             | 0.102                                                        | 0.686                          | 2710.75            | 1859.78            | 0.070                          | 1726.95            | 120.68             |
| A_68_P28600140 | chr12:86114302-86114346                           | NM_028863:105     | Isc2          | INSIDE                 | 0.102                                                        | 1.409                          | 3398.71            | 4789.39            | 0.144                          | 2317.64            | 333.26             |
| A_68_P32798241 | chrX:160857957-160858011                          | NM_011081:266     | Piga          | INSIDE                 | 0.102                                                        | 1.457                          | 2146.44            | 3126.36            | 0.149                          | 807.01             | 120.17             |
| A_68_P24225084 | chr6:8209188-8209232                              | NM_026632:-69     | Rpa3          | DIVERGENT_PROMOTER     | 0.102                                                        | 1.348                          | 4137.62            | 5578.65            | 0.138                          | 2556.86            | 352.94             |
| A_68_P2508653  | chr7:52103806-52103850                            | NM_001042655:621  | Tbc1d17       | INSIDE                 | 0.102                                                        | 0.696                          | 2513.65            | 1748.40            | 0.071                          | 1809.48            | 128.72             |
| A_68_P26552550 | chr9:59139013-59139070                            | NM_028121:-337    | Adpgk         | PROMOTER               | 0.101                                                        | 1.660                          | 908.07             | 1507.08            | 0.168                          | 688.46             | 115.73             |
| A_68_P21486780 | chr2:103868083-103868131                          | NM_020593:151     | Fbxo3         | INSIDE                 | 0.101                                                        | 2.395                          | 699.92             | 1676.08            | 0.243                          | 495.55             | 120.36             |
| A_68_P32696394 | chrX:136405677-136405721                          | NM_001193309:495  | Morc4         | INSIDE                 | 0.101                                                        | 1.642                          | 2535.81            | 4164.73            | 0.166                          | 1103.02            | 182.57             |
| A_68_P27534166 | chr10:126558114-126558159                         | NM_001171026:80   | Os9           | INSIDE                 | 0.101                                                        | 1.364                          | 3748.51            | 5114.02            | 0.138                          | 2553.80            | 353.06             |
| A_68_P32456129 | chrX:69208413-69208457                            | NM_001081135:75   | Prrg3         | INSIDE                 | 0.101                                                        | 2.052                          | 2479.58            | 5089.18            | 0.208                          | 973.52             | 202.13             |
| A_68_P32465510 | chrX:71167458-71167506                            | NM_001164704:8707 | Renbp         | INSIDE                 | 0.101                                                        | 2.040                          | 1651.28            | 3369.26            | 0.205                          | 574.49             | 118.03             |
| A_68_P31809752 | chr18:70632290-70632335                           | NM_029019:114     | Stard6        | INSIDE                 | 0.101                                                        | 1.505                          | 1184.65            | 1783.13            | 0.151                          | 786.22             | 119.10             |
| A_68_P27680036 | chr11:30549094-30549138                           | NM_029344:280     | Acyp2         | INSIDE                 | 0.100                                                        | 0.378                          | 4018.16            | 1517.92            | 0.038                          | 3253.51            | 122.83             |
| A_68_P24004706 | chr5:115021554-115021604                          | NM_001004180:3319 | BC057022      | INSIDE                 | 0.100                                                        | 1.572                          | 2898.66            | 4556.83            | 0.157                          | 1713.57            | 269.70             |
| A_68_P24799556 | chr6:120616027-120616071                          | NM_001128151:-390 | Cecr2         | PROMOTER               | 0.100                                                        | 0.687                          | 3552.49            | 2441.58            | 0.069                          | 2449.23            | 167.96             |
| A_68_P27901910 | chr11:70469767-70469811                           | NM_001136062:-926 | Eno3          | DIVERGENT_PROMOTER     | 0.100                                                        | 0.582                          | 3006.37            | 1749.57            | 0.058                          | 2087.66            | 121.08             |
| A_68_P29259682 | chr13:99585022-99585066                           | NM_172591:360     | Fcho2         | INSIDE                 | 0.100                                                        | 0.530                          | 3021.18            | 1600.17            | 0.053                          | 2475.84            | 131.59             |
| A_68_P25150562 | chr7:64642665-64642709                            | NR_033504:45      | Gm9962        | INSIDE                 | 0.100                                                        | 0.526                          | 3078.98            | 1620.38            | 0.053                          | 2241.26            | 118.13             |
| A_68_P28082319 | chr11:102786133-102786177                         | NM_197959:284     | Kif18b        | INSIDE                 | 0.100                                                        | 0.605                          | 4265.79            | 2579.55            | 0.061                          | 2768.17            | 168.18             |
| A_68_P21151628 | chr2:38860218-38860262                            | NM_025592:411     | Rpl35         | INSIDE                 | 0.100                                                        | 0.656                          | 3001.82            | 1968.35            | 0.066                          | 2335.39            | 153.75             |
| A_68_P31257289 | chr17:56753149-56753198                           | NM_018730:356     | Rpl36         | INSIDE                 | 0.100                                                        | 0.657                          | 2368.40            | 1555.93            | 0.066                          | 1774.54            | 116.93             |
| A_68_P27274091 | chr10:77875465-77875509                           | NM_010925:302     | Rrp1          | INSIDE                 | 0.100                                                        | 0.543                          | 3127.89            | 1699.28            | 0.055                          | 2218.82            | 121.00             |
| A_68_P28751515 | chr12:113883521-113883565                         | NM_001161737:504  | Siva1         | INSIDE                 | 0.100                                                        | 0.686                          | 2619.46            | 1797.55            | 0.068                          | 1845.59            | 126.25             |
| A_68_P31145138 | chr17:32487412-32487456                           | NM_017476:88      | Akap81        | INSIDE                 | 0.099                                                        | 0.749                          | 4511.75            | 3377.65            | 0.074                          | 2899.74            | 214.89             |
| A_68_P32260250 | chrX:11654399-11654443                            | NM_029510:3259    | Bcor          | INSIDE                 | 0.099                                                        | 1.476                          | 6046.26            | 8925.59            | 0.146                          | 1946.65            | 284.92             |
| A_68_P29018477 | chr13:48357119-48357169                           | NM_031166:349     | Id4           | INSIDE                 | 0.099                                                        | 0.601                          | 2733.85            | 1642.16            | 0.059                          | 1996.37            | 118.19             |
| A_68_P27947415 | chr11:78959320-78959364                           | NM_013571:514     | Ksr1          | INSIDE                 | 0.099                                                        | 0.690                          | 2768.75            | 1909.62            | 0.068                          | 1801.10            | 122.82             |
| A_68_P20587181 | chr1:127808737-127808781                          | NM_145100:33      | Lypd1         | INSIDE                 | 0.099                                                        | 1.824                          | 2114.75            | 3858.07            | 0.181                          | 1318.43            | 239.07             |
| A_68_P25664799 | chr8:12915651-12915695                            | NM_178076:-220    | Mcf2l         | PROMOTER               | 0.099                                                        | 0.713                          | 2965.67            | 2115.78            | 0.071                          | 1847.24            | 130.46             |
| A_68_P32466326 | chrX:71330622-71330666                            | NM_010788:288     | Mecp2         | INSIDE                 | 0.099                                                        | 1.935                          | 2987.87            | 5781.00            | 0.192                          | 1034.32            | 198.18             |
| A_68_P25988740 | chr8:80959381-80959425                            | NM_138944:1149    | Pou4f2        | INSIDE                 | 0.099                                                        | 2.163                          | 15337.40           | 33180.84           | 0.215                          | 9247.74            | 1985.87            |
| A_68_P20352745 | chr1:75216487-75216531                            | NM_009447:-680    | Tuba4a        | PROMOTER               | 0.099                                                        | 0.597                          | 2801.56            | 1673.20            | 0.059                          | 2084.90            | 123.34             |
| A_68_P28078915 | chr11:102181318-102181368                         | NM_011551:-932    | Ubf1          | PROMOTER               | 0.099                                                        | 1.396                          | 1276.09            | 1781.33            | 0.139                          | 869.46             | 120.73             |
| A_68_P32795512 | chrX:160346535-160346579                          | NM_026887:-535    | Ap1s2         | PROMOTER               | 0.098                                                        | 1.570                          | 2884.52            | 4528.49            | 0.155                          | 1094.51            | 169.22             |
| A_68_P24104837 | chr5:133017392-133017444                          | NM_177047:795     | Aut2          | INSIDE                 | 0.098                                                        | 1.484                          | 1154.17            | 1712.27            | 0.145                          | 835.43             | 121.01             |
| A_68_P20778062 | chr1:164407645-164407689                          | NM_001038619:495  | Dnm3          | INSIDE                 | 0.098                                                        | 0.553                          | 4111.38            | 2271.78            | 0.054                          | 3052.44            | 166.13             |
| A_68_P21933403 | chr3:8664956-8665000                              | NM_010423:2060    | Hey1          | INSIDE                 | 0.098                                                        | 0.613                          | 2701.20            | 1656.23            | 0.060                          | 1964.09            | 118.45             |
| A_68_P30572652 | chr16:17233443-17233487                           | NM_178922:-215    | Hic2          | PROMOTER               | 0.098                                                        | 0.571                          | 2791.23            | 1595.13            | 0.056                          | 2187.85            | 122.38             |



| ProbeName      | Target position of probe on CpG island microarray | TargetID          | GeneSymbol    | CpG island Description | Ratio of relative methylation (TiO <sub>2</sub> -NP/Vehicle) | Sham group                     |                    |                    | TiO <sub>2</sub> -H group      |                    |                    |
|----------------|---------------------------------------------------|-------------------|---------------|------------------------|--------------------------------------------------------------|--------------------------------|--------------------|--------------------|--------------------------------|--------------------|--------------------|
|                |                                                   |                   |               |                        |                                                              | Relative methylation (Cy5/Cy3) | Cy3 signal (Input) | Cy5 signal (MeDIP) | Relative methylation (Cy5/Cy3) | Cy3 signal (Input) | Cy5 signal (MeDIP) |
| A_68_P31866356 | chr18:80910683-80910727                           | NM_001164110-894  | Nfatc1        | PROMOTER               | 0.098                                                        | 0.682                          | 2648.16            | 1806.05            | 0.067                          | 1876.69            | 125.67             |
| A_68_P22518745 | chr3:128917350-128917394                          | NM_001042502:518  | Pitx2         | INSIDE                 | 0.098                                                        | 0.713                          | 2440.81            | 1739.12            | 0.070                          | 1670.43            | 116.53             |
| A_68_P23232644 | chr4:116805889-116805940                          | NM_013807:643     | Plk3          | INSIDE                 | 0.098                                                        | 1.433                          | 2102.86            | 3012.87            | 0.140                          | 1484.68            | 208.44             |
| A_68_P32238979 | chrX:7151677-7151727                              | NM_138605-456     | Ppp1r3f       | DIVERGENT_PROMOTER     | 0.098                                                        | 1.949                          | 2287.73            | 4458.78            | 0.191                          | 834.31             | 159.24             |
| A_68_P28519207 | chr12:71328317-71328361                           | NM_133198:332     | Pygl          | INSIDE                 | 0.098                                                        | 0.733                          | 2449.40            | 1795.97            | 0.072                          | 1678.78            | 120.54             |
| A_68_P28535622 | chr12:74213314-74213358                           | NM_011382:896     | Six4          | INSIDE                 | 0.098                                                        | 0.458                          | 5157.11            | 2363.02            | 0.045                          | 4099.58            | 183.87             |
| A_68_P24179198 | chr5:149211250-149211294                          | NM_007513:208     | Slc7a1        | INSIDE                 | 0.098                                                        | 0.678                          | 2631.10            | 1784.16            | 0.066                          | 1868.57            | 124.19             |
| A_68_P23749448 | chr5:64550705-64550749                            | NM_019636-723     | Tbc1d1        | PROMOTER               | 0.098                                                        | 0.588                          | 2519.70            | 1480.59            | 0.058                          | 2083.97            | 119.96             |
| A_68_P20184658 | chr1:42752112-42752171                            | NR_027826-471     | 2610017I09Rik | DIVERGENT_PROMOTER     | 0.097                                                        | 2.128                          | 723.64             | 1539.94            | 0.207                          | 577.58             | 119.60             |
| A_68_P21631946 | chr2:130665493-130665537                          | NM_029432:332     | 4930402H24Rik | INSIDE                 | 0.097                                                        | 0.579                          | 2842.83            | 1647.26            | 0.056                          | 2115.54            | 118.97             |
| A_68_P27756958 | chr1:44433864-44433908                            | NM_007897:2251    | Ebf1          | INSIDE                 | 0.097                                                        | 0.602                          | 2795.45            | 1682.18            | 0.058                          | 2017.61            | 117.38             |
| A_68_P24295385 | chr6:23197965-23198012                            | NM_028462:276     | Fezf1         | INSIDE                 | 0.097                                                        | 0.674                          | 2733.93            | 1843.83            | 0.066                          | 1863.56            | 122.39             |
| A_68_P30347594 | chr15:76161371-76161427                           | NM_010331-325     | Gpaa1         | PROMOTER               | 0.097                                                        | 1.732                          | 3798.95            | 6579.07            | 0.168                          | 2617.21            | 439.45             |
| A_68_P28153291 | chr11:115265419-115265463                         | NM_026729:361     | Ict1          | INSIDE                 | 0.097                                                        | 0.611                          | 3100.80            | 1893.09            | 0.059                          | 2044.59            | 121.42             |
| A_68_P23088445 | chr4:87678149-87678193                            | NM_027326:1141    | Mllt3         | INSIDE                 | 0.097                                                        | 1.463                          | 1250.70            | 1829.75            | 0.142                          | 851.33             | 121.23             |
| A_68_P23615749 | chr5:38218796-38218844                            | NM_010835-2996    | Msx1          | PROMOTER               | 0.097                                                        | 0.700                          | 2498.75            | 1748.87            | 0.068                          | 1757.86            | 119.86             |
| A_68_P31117691 | chr17:27792800-27792847                           | NM_011861:197     | Pacsin1       | INSIDE                 | 0.097                                                        | 1.781                          | 2537.19            | 4517.62            | 0.173                          | 1782.84            | 309.16             |
| A_68_P24428256 | chr6:48551764-48551808                            | NM_001079901:7905 | Repin1        | DOWNSTREAM             | 0.097                                                        | 0.571                          | 3897.33            | 2224.12            | 0.056                          | 2850.56            | 158.25             |
| A_68_P21085997 | chr2:27532005-27532049                            | NM_011305-694     | Rxra          | PROMOTER               | 0.097                                                        | 0.539                          | 3354.66            | 1807.88            | 0.052                          | 2324.06            | 121.18             |
| A_68_P22319130 | chr3:89199983-89200027                            | NM_009565-2879    | Zbtb7b        | PROMOTER               | 0.097                                                        | 1.370                          | 3604.55            | 4939.84            | 0.132                          | 2314.19            | 306.42             |
| A_68_P24972086 | chr7:13063602-13063648                            | NM_001039951-29   | Zfp606        | PROMOTER               | 0.097                                                        | 0.731                          | 2191.81            | 1602.35            | 0.071                          | 1688.84            | 120.13             |
| A_68_P20859036 | chr1:179269190-179269235                          |                   |               | Unknown                | 0.097                                                        | 0.593                          | 3275.94            | 1942.36            | 0.057                          | 2291.85            | 131.49             |
| A_68_P26600190 | chr9:67481095-67481139                            |                   |               | Unknown                | 0.097                                                        | 0.687                          | 2446.79            | 1681.82            | 0.066                          | 1788.83            | 118.88             |
| A_68_P25505909 | chr7:134655506-134655551                          | NR_024331:855     | 1700008J07Rik | INSIDE                 | 0.096                                                        | 0.686                          | 2461.44            | 1688.69            | 0.066                          | 1760.20            | 115.85             |
| A_68_P24818074 | chr6:124947113-124947157                          | NM_001145927-1320 | C530028O21Rik | PROMOTER               | 0.096                                                        | 0.584                          | 3975.60            | 2320.86            | 0.056                          | 2612.11            | 145.96             |
| A_68_P29737944 | chr14:77557089-77557133                           | NM_172813:488     | Enox1         | INSIDE                 | 0.096                                                        | 0.619                          | 2862.54            | 1772.12            | 0.060                          | 2050.29            | 122.15             |
| A_68_P31344185 | chr17:73457680-73457725                           | NM_001081071:378  | Lelatl        | INSIDE                 | 0.096                                                        | 0.605                          | 2613.75            | 1580.26            | 0.058                          | 2063.89            | 119.58             |
| A_68_P31074433 | chr17:17762462-17762506                           | NM_172827-1031    | Lnsep         | PROMOTER               | 0.096                                                        | 1.541                          | 4977.27            | 7669.21            | 0.149                          | 3293.10            | 489.09             |
| A_68_P23417961 | chr4:151689896-151689940                          | NM_001033489:2816 | Rnf207        | INSIDE                 | 0.096                                                        | 1.485                          | 1945.18            | 2888.13            | 0.142                          | 1178.34            | 167.47             |
| A_68_P32117790 | chr19:41970534-41970578                           | NM_199447:87      | Rrp12         | INSIDE                 | 0.096                                                        | 1.475                          | 5616.48            | 8284.03            | 0.141                          | 3624.66            | 511.70             |
| A_68_P26983378 | chr10:19571100-19571144                           | NM_029529:143     | Slc35d3       | INSIDE                 | 0.096                                                        | 0.615                          | 2845.12            | 1750.59            | 0.059                          | 2155.76            | 127.27             |
| A_68_P32036084 | chr19:26680907-26680951                           | NM_011416:1279    | Smarca2       | INSIDE                 | 0.096                                                        | 0.602                          | 2879.04            | 1733.99            | 0.058                          | 2012.12            | 116.74             |
| A_68_P28047901 | chr1:196839052-96839100                           | NM_001080964-74   | Sp2           | PROMOTER               | 0.096                                                        | 2.050                          | 940.01             | 1927.24            | 0.198                          | 612.72             | 121.04             |
| A_68_P30296502 | chr15:67007203-67007248                           | NM_009177:1219    | St3gal1       | INSIDE                 | 0.096                                                        | 0.590                          | 2928.70            | 1727.49            | 0.057                          | 2120.27            | 120.20             |
| A_68_P27846980 | chr11:60988451-60988495                           | NM_001004143:89   | Usp22         | INSIDE                 | 0.096                                                        | 0.605                          | 2922.75            | 1769.03            | 0.058                          | 2122.12            | 122.84             |
| A_68_P23440510 | chr4:155144347-155144391                          | NM_147776:4302    | Vwal          | INSIDE                 | 0.096                                                        | 1.780                          | 4304.34            | 7660.18            | 0.171                          | 2725.87            | 465.45             |
| A_68_P30476324 | chr15:98593039-98593083                           | NM_007478:489     | Arf3          | INSIDE                 | 0.095                                                        | 1.584                          | 2749.81            | 4356.37            | 0.151                          | 1835.59            | 277.20             |
| A_68_P27685427 | chr11:31771207-31771257                           | NM_026252-978     | Cpeb4         | PROMOTER               | 0.095                                                        | 1.649                          | 1143.34            | 1885.26            | 0.157                          | 760.29             | 119.28             |
| A_68_P27541863 | chr10:127962197-127962241                         | NM_011843:697     | Esytl1        | INSIDE                 | 0.095                                                        | 0.484                          | 3415.01            | 1653.85            | 0.046                          | 2501.62            | 115.69             |
| A_68_P32746467 | chrX:148238346-148238395                          | NM_021523:546     | Huwe1         | INSIDE                 | 0.095                                                        | 2.035                          | 1820.13            | 3704.42            | 0.194                          | 592.67             | 115.02             |
| A_68_P29348448 | chr13:115608501-115608545                         | NM_001113374:78   | Mocs2         | INSIDE                 | 0.095                                                        | 0.685                          | 3500.56            | 2396.99            | 0.065                          | 2555.47            | 166.97             |
| A_68_P25375581 | chr7:108966881-108966925                          | NM_008887:76      | Phox2a        | INSIDE                 | 0.095                                                        | 0.713                          | 2481.75            | 1769.57            | 0.068                          | 1898.03            | 128.44             |
| A_68_P24043181 | chr5:121654660-121654704                          | NM_011290:173     | Rpl6          | INSIDE                 | 0.095                                                        | 0.538                          | 2971.47            | 1598.61            | 0.051                          | 2277.71            | 116.39             |
| A_68_P23271976 | chr4:124744252-124744296                          | NM_175246:338     | Snip1         | INSIDE                 | 0.095                                                        | 0.656                          | 2594.54            | 1702.23            | 0.062                          | 1892.47            | 117.77             |
| A_68_P28936823 | chr13:34222460-34222504                           | NM_023716-259     | Tubb2b        | PROMOTER               | 0.095                                                        | 1.885                          | 9046.41            | 17054.26           | 0.179                          | 5512.25            | 986.47             |
| A_68_P31420724 | chr17:87424991-87425037                           | NM_019936:114     | Cript         | INSIDE                 | 0.094                                                        | 1.411                          | 2658.36            | 3751.73            | 0.133                          | 1895.95            | 251.82             |
| A_68_P22941966 | chr4:56878242-56878286                            | NM_018761-181     | Cttnal1       | PROMOTER               | 0.094                                                        | 0.737                          | 3378.25            | 2490.28            | 0.069                          | 2376.21            | 164.66             |
| A_68_P28033990 | chr11:94491386-94491430                           | NM_133807:271     | Lrcc59        | INSIDE                 | 0.094                                                        | 0.437                          | 4001.82            | 1747.53            | 0.041                          | 2873.50            | 118.49             |
| A_68_P27922357 | chr11:74584686-74584730                           | NM_026197:344     | Mettl16       | INSIDE                 | 0.094                                                        | 1.562                          | 1192.86            | 1863.45            | 0.147                          | 942.42             | 138.16             |
| A_68_P32691812 | chrX:135449017-135449063                          | NM_013724:72      | Nrk           | INSIDE                 | 0.094                                                        | 3.143                          | 1481.01            | 4654.61            | 0.294                          | 570.56             | 167.80             |
| A_68_P24815138 | chr6:124364754-124364798                          | NM_008995:309     | Pex5          | INSIDE                 | 0.094                                                        | 0.726                          | 2860.12            | 2077.77            | 0.068                          | 1976.67            | 135.04             |

| ProbeName      | Target position of probe on CpG island microarray | TargetID           | GeneSymbol    | CpG island Description | Ratio of relative methylation (TiO <sub>2</sub> -NP/Vehicle) | Sham group                     |                    |                    | TiO <sub>2</sub> -H group      |                    |                    |
|----------------|---------------------------------------------------|--------------------|---------------|------------------------|--------------------------------------------------------------|--------------------------------|--------------------|--------------------|--------------------------------|--------------------|--------------------|
|                |                                                   |                    |               |                        |                                                              | Relative methylation (Cy5/Cy3) | Cy3 signal (Input) | Cy5 signal (MeDIP) | Relative methylation (Cy5/Cy3) | Cy3 signal (Input) | Cy5 signal (MeDIP) |
| A_68_P32790799 | chrX:159199053-159199097                          | NM_009031:771      | Rbbp7         | INSIDE                 | 0.094                                                        | 2.219                          | 4538.78            | 10072.80           | 0.208                          | 2097.62            | 435.96             |
| A_68_P24785568 | chr6:118147500-118147544                          | NM_001080780:240   | Ret           | INSIDE                 | 0.094                                                        | 2.388                          | 10979.76           | 26219.25           | 0.225                          | 6636.61            | 1490.45            |
| A_68_P25091604 | chr7:52431430-52431474                            | NM_182993:12162    | Slc17a7       | INSIDE                 | 0.094                                                        | 2.939                          | 8630.71            | 25361.52           | 0.277                          | 4801.50            | 1331.85            |
| A_68_P21783932 | chr2:158437350-158437394                          | NM_009508:879      | Slc32a1       | INSIDE                 | 0.094                                                        | 0.748                          | 6245.23            | 4670.35            | 0.071                          | 4035.16            | 285.01             |
| A_68_P30510786 | chr16:4558818-4558862                             | NM_031182:880      | Tcfap4        | INSIDE                 | 0.094                                                        | 0.496                          | 3581.30            | 1774.60            | 0.046                          | 2543.23            | 118.19             |
| A_68_P22708706 | chr4:6918269-6918313                              | NM_145711:-420     | Tox           | PROMOTER               | 0.094                                                        | 0.752                          | 5768.87            | 4337.10            | 0.071                          | 3833.26            | 270.81             |
| A_68_P24295386 | chr6:23198116-23198160                            | NM_028462:126      | Fezf1         | INSIDE                 | 0.093                                                        | 0.733                          | 3157.65            | 2316.08            | 0.069                          | 2097.79            | 143.85             |
| A_68_P31259698 | chr17:57171184-57171228                           | NM_010613:-276     | Khgrp         | PROMOTER               | 0.093                                                        | 0.563                          | 3531.04            | 1987.89            | 0.052                          | 2623.12            | 136.68             |
| A_68_P21046080 | chr2:19580505-19580552                            | NM_027715:840      | Otud1         | INSIDE                 | 0.093                                                        | 1.398                          | 1215.23            | 1698.91            | 0.130                          | 1014.23            | 131.51             |
| A_68_P32289247 | chrX:20195452-20195505                            | NM_001167776:594   | Rbm10         | INSIDE                 | 0.093                                                        | 1.501                          | 2255.84            | 3386.70            | 0.139                          | 849.63             | 118.40             |
| A_68_P22412732 | chr3:108248246-108248294                          | NM_001204979:-93   | Sars          | PROMOTER               | 0.093                                                        | 0.667                          | 2721.42            | 1816.43            | 0.062                          | 1934.76            | 120.72             |
| A_68_P28102660 | chr11:106473862-106473908                         | NM_198292:360      | Tex2          | INSIDE                 | 0.093                                                        | 0.613                          | 3115.84            | 1908.84            | 0.057                          | 2226.23            | 127.47             |
| A_68_P29484376 | chr14:27783003-27783055                           | NM_145221:709      | Appl1         | INSIDE                 | 0.092                                                        | 0.665                          | 2691.53            | 1789.55            | 0.061                          | 1896.03            | 116.17             |
| A_68_P25093837 | chr7:52825440-52825491                            | NM_009737:-267     | Beat2         | PROMOTER               | 0.092                                                        | 1.931                          | 1625.10            | 3138.28            | 0.177                          | 1068.24            | 189.09             |
| A_68_P28059225 | chr11:98769164-98769211                           | NM_001025779:-15   | Cdc6          | PROMOTER               | 0.092                                                        | 1.435                          | 3080.32            | 4421.42            | 0.132                          | 1984.56            | 261.01             |
| A_68_P26971597 | chr10:17443088-17443132                           | NM_010828:77       | Cited2        | INSIDE                 | 0.092                                                        | 0.727                          | 4990.73            | 3629.41            | 0.067                          | 3462.83            | 230.99             |
| A_68_P21071362 | chr2:25174225-25174270                            | NM_001177656:436   | Grin1         | INSIDE                 | 0.092                                                        | 0.738                          | 2525.73            | 1864.24            | 0.068                          | 1722.66            | 116.66             |
| A_68_P32465786 | chrX:71211813-71211857                            | NM_008224:-180     | Hcfc1         | PROMOTER               | 0.092                                                        | 2.410                          | 2382.95            | 5743.18            | 0.221                          | 857.36             | 189.12             |
| A_68_P26216543 | chr8:122394587-122394646                          | NM_146219:8412     | Klhl36        | INSIDE                 | 0.092                                                        | 2.460                          | 687.92             | 1692.01            | 0.226                          | 562.75             | 127.29             |
| A_68_P31411765 | chr17:86021432-86021477                           | NM_011381:1281     | Six3          | INSIDE                 | 0.092                                                        | 0.658                          | 2687.41            | 1769.21            | 0.060                          | 2029.65            | 122.78             |
| A_68_P29440563 | chr14:19726488-19726532                           | NM_144839:-369     | Ube2e2        | PROMOTER               | 0.092                                                        | 2.790                          | 14911.27           | 41604.55           | 0.257                          | 9652.93            | 2478.26            |
| A_68_P22346424 | chr3:95733202-95733246                            | NM_023210:45       | Amp32c        | INSIDE                 | 0.091                                                        | 0.587                          | 3302.07            | 1939.57            | 0.053                          | 2484.57            | 132.32             |
| A_68_P32369309 | chrX:46847140-46847184                            | NM_001081123:23536 | Arhgap36      | INSIDE                 | 0.091                                                        | 1.831                          | 3852.82            | 7054.90            | 0.166                          | 1444.40            | 240.23             |
| A_68_P28003593 | chr11:88922175-88922219                           | NM_019505:-134     | Dgke          | PROMOTER               | 0.091                                                        | 0.724                          | 4385.09            | 3174.27            | 0.066                          | 3073.38            | 201.66             |
| A_68_P24156215 | chr5:144126161-144126205                          | NM_133355:596      | Grid2ip       | INSIDE                 | 0.091                                                        | 0.658                          | 2795.15            | 1838.53            | 0.060                          | 1986.64            | 118.49             |
| A_68_P32727714 | chrX:143397800-143397847                          | NM_008312:768      | Htr2c         | INSIDE                 | 0.091                                                        | 2.948                          | 1053.02            | 3104.47            | 0.268                          | 438.49             | 117.56             |
| A_68_P28037994 | chr11:95170942-95170986                           | NM_001195003:596   | Myst2         | INSIDE                 | 0.091                                                        | 0.712                          | 2425.63            | 1726.09            | 0.065                          | 1875.50            | 121.79             |
| A_68_P32118990 | chr19:42165379-42165423                           | NM_145501:476      | Pi4k2a        | INSIDE                 | 0.091                                                        | 0.705                          | 3132.84            | 2209.61            | 0.064                          | 2332.25            | 149.57             |
| A_68_P32699217 | chrX:136991521-136991565                          | NM_021463:401      | Prps1         | INSIDE                 | 0.091                                                        | 1.930                          | 2446.42            | 4721.17            | 0.176                          | 954.07             | 168.25             |
| A_68_P30670711 | chr16:35542576-35542620                           | NM_013661:1151     | Sema5b        | INSIDE                 | 0.091                                                        | 0.449                          | 3881.02            | 1744.02            | 0.041                          | 3032.25            | 123.37             |
| A_68_P27985540 | chr11:85646214-85646259                           | NM_009324:120      | Tbx2          | INSIDE                 | 0.091                                                        | 1.680                          | 960.96             | 1614.69            | 0.154                          | 766.00             | 117.73             |
| A_68_P27104119 | chr10:43868447-43868491                           |                    |               | Unknown                | 0.091                                                        | 0.652                          | 3005.45            | 1959.91            | 0.060                          | 2046.39            | 122.05             |
| A_68_P32396639 | chrX:53851315-53851359                            | NM_146234:-240     | Mmgt1         | PROMOTER               | 0.090                                                        | 1.981                          | 2044.38            | 4050.73            | 0.179                          | 969.54             | 173.19             |
| A_68_P27357765 | chr10:93610485-93610538                           | NM_011629:-164     | Nr2c1         | PROMOTER               | 0.090                                                        | 1.434                          | 2855.08            | 4093.69            | 0.130                          | 1944.92            | 252.30             |
| A_68_P23354401 | chr4:139377795-139377839                          | NM_011039:11067    | Pax7          | INSIDE                 | 0.090                                                        | 0.624                          | 3088.81            | 1927.55            | 0.056                          | 2075.44            | 117.12             |
| A_68_P26587155 | chr9:65194859-65194910                            | NM_016688:1010     | Pdcd7         | INSIDE                 | 0.090                                                        | 0.674                          | 2960.66            | 1995.37            | 0.060                          | 2000.98            | 120.88             |
| A_68_P29587990 | chr14:49065856-49065910                           | NM_172600:-144     | 6720456H20Rik | PROMOTER               | 0.089                                                        | 0.709                          | 2798.46            | 1982.78            | 0.063                          | 1907.49            | 120.25             |
| A_68_P22321220 | chr3:89519673-89519729                            | NM_001038587:757   | Adar          | INSIDE                 | 0.089                                                        | 0.692                          | 2887.04            | 1997.45            | 0.062                          | 2104.34            | 130.19             |
| A_68_P26467270 | chr9:44187680-44187724                            | NM_021395:130      | Hyou1         | INSIDE                 | 0.089                                                        | 0.715                          | 2770.75            | 1981.99            | 0.064                          | 2056.23            | 131.22             |
| A_68_P21305449 | chr2:68699678-68699722                            | NM_172856:87       | Lass6         | INSIDE                 | 0.089                                                        | 0.714                          | 2771.14            | 1978.10            | 0.063                          | 1875.64            | 118.97             |
| A_68_P27982140 | chr11:85125306-85125350                           | NM_016910:573      | Ppm1d         | INSIDE                 | 0.089                                                        | 0.734                          | 2455.57            | 1802.06            | 0.066                          | 1804.02            | 118.41             |
| A_68_P28765897 | chr12:117316101-117316145                         | NM_009511:-73      | Vipr2         | PROMOTER               | 0.089                                                        | 0.738                          | 2223.11            | 1641.65            | 0.066                          | 1824.72            | 120.40             |
| A_68_P27268626 | chr10:76978772-76978818                           | NM_133998:-236     | 1810008A18Rik | PROMOTER               | 0.088                                                        | 0.724                          | 2614.28            | 1893.48            | 0.064                          | 1833.69            | 117.28             |
| A_68_P22889568 | chr4:46614078-46614122                            | NM_001164804:701   | Coro2a        | INSIDE                 | 0.088                                                        | 0.724                          | 2470.65            | 1788.66            | 0.064                          | 1938.06            | 123.89             |
| A_68_P24135004 | chr5:139821148-139821192                          | NM_197980:-50      | Cox19         | DIVERGENT_PROMOTER     | 0.088                                                        | 0.636                          | 4720.53            | 3002.72            | 0.056                          | 3184.38            | 178.65             |
| A_68_P29681788 | chr14:67486601-67486645                           | NM_009955:815      | Dpysl2        | INSIDE                 | 0.088                                                        | 1.990                          | 6312.82            | 12565.59           | 0.175                          | 4012.47            | 701.53             |
| A_68_P20186163 | chr1:43010333-43010377                            | NM_053107:638      | Gpr45         | INSIDE                 | 0.088                                                        | 1.770                          | 10255.33           | 18152.41           | 0.156                          | 6082.87            | 951.65             |
| A_68_P26025056 | chr8:88017117-88017161                            | NM_173866:623      | Gpi2          | INSIDE                 | 0.088                                                        | 0.679                          | 3052.04            | 2071.98            | 0.060                          | 2121.83            | 126.60             |
| A_68_P20937890 | chr1:193221506-193221550                          | NM_144880:-608     | Ppp2r5a       | PROMOTER               | 0.088                                                        | 0.739                          | 2514.81            | 1859.29            | 0.065                          | 1834.82            | 119.50             |
| A_68_P32479503 | chrX:75040859-75040905                            | NM_016979:417      | Prkx          | INSIDE                 | 0.088                                                        | 1.916                          | 1957.16            | 3750.13            | 0.169                          | 710.61             | 120.44             |
| A_68_P30348874 | chr15:76350196-76350240                           | NM_130893:2341     | Sert1         | INSIDE                 | 0.088                                                        | 1.855                          | 10808.14           | 20049.85           | 0.163                          | 6370.92            | 1038.67            |

| ProbeName      | Target position of probe on CpG island microarray | TargetID                | GeneSymbol    | CpG island Description | Ratio of relative methylation (TiO <sub>2</sub> -NP/Vehicle) | Sham group                     |                    |                    | TiO <sub>2</sub> -H group      |                    |                    |
|----------------|---------------------------------------------------|-------------------------|---------------|------------------------|--------------------------------------------------------------|--------------------------------|--------------------|--------------------|--------------------------------|--------------------|--------------------|
|                |                                                   |                         |               |                        |                                                              | Relative methylation (Cy5/Cy3) | Cy3 signal (Input) | Cy5 signal (MeDIP) | Relative methylation (Cy5/Cy3) | Cy3 signal (Input) | Cy5 signal (MeDIP) |
| A_68_P32036067 | chr19:26678985-26679030                           | NM_011416:-642          | Smarca2       | PROMOTER               | 0.088                                                        | 1.741                          | 5326.76            | 9275.55            | 0.153                          | 3434.24            | 525.22             |
| A_68_P31145137 | chr17:32487319-32487363                           | NM_017476:182           | Akap81        | INSIDE                 | 0.087                                                        | 1.577                          | 3470.55            | 5473.20            | 0.137                          | 2299.72            | 314.37             |
| A_68_P29575956 | chr14:47007694-47007740                           | NM_007554:2558          | Bmp4          | INSIDE                 | 0.087                                                        | 2.096                          | 1870.95            | 3921.78            | 0.183                          | 1256.59            | 230.24             |
| A_68_P21605247 | chr2:125684679-125684728                          | NM_009939:51            | Cops2         | INSIDE                 | 0.087                                                        | 1.832                          | 1477.37            | 2707.09            | 0.159                          | 959.46             | 152.71             |
| A_68_P32468048 | chrX:71674396-71674448                            | NM_008062:78            | G6pdx         | INSIDE                 | 0.087                                                        | 2.031                          | 1862.12            | 3782.36            | 0.176                          | 685.10             | 120.82             |
| A_68_P26465908 | chr9:43942942-43942986                            | NM_023061:224           | Mcam          | INSIDE                 | 0.087                                                        | 0.708                          | 3512.73            | 2485.37            | 0.062                          | 2331.60            | 143.60             |
| A_68_P25368570 | chr7:107731384-107731428                          | NM_198831:238           | Mrp148        | INSIDE                 | 0.087                                                        | 0.577                          | 3498.30            | 2017.03            | 0.050                          | 2586.56            | 129.01             |
| A_68_P31983175 | chr19:17030736-17030792                           | NM_181348:157           | Prune2        | INSIDE                 | 0.087                                                        | 1.416                          | 1322.36            | 1872.16            | 0.124                          | 965.87             | 119.36             |
| A_68_P29405446 | chr14:12386981-12387025                           | NM_008981:936           | Ptprg         | INSIDE                 | 0.087                                                        | 0.565                          | 3968.43            | 2242.14            | 0.049                          | 2981.08            | 147.26             |
| A_68_P24327616 | chr6:29559131-29559176                            | NM_177296:454           | Tnpo3         | INSIDE                 | 0.087                                                        | 0.652                          | 2501.68            | 1630.35            | 0.056                          | 2038.32            | 115.08             |
| A_68_P27308092 | chr10:84850082-84850126                           | NM_028709:546           | Btbd11        | INSIDE                 | 0.086                                                        | 0.453                          | 4449.39            | 2016.92            | 0.039                          | 3007.86            | 117.16             |
| A_68_P26540068 | chr9:56920704-56920750                            | NM_001110350:-3456      | Sin3a         | PROMOTER               | 0.086                                                        | 0.589                          | 3349.84            | 1973.10            | 0.051                          | 2397.22            | 122.00             |
| A_68_P29102446 | chr13:65342785-65342836                           |                         |               | Unknown                | 0.086                                                        | 1.634                          | 3632.57            | 5934.77            | 0.141                          | 2245.85            | 316.68             |
| A_68_P24039807 | chr5:121062809-121062858                          | NM_029096:-235          | 1110008J03Rik | DIVERGENT_PROMOTER     | 0.085                                                        | 0.741                          | 2716.71            | 2012.92            | 0.063                          | 1912.35            | 120.62             |
| A_68_P32651800 | chrX:126284923-126284967                          | NM_172493:667           | Diap2         | INSIDE                 | 0.085                                                        | 1.796                          | 2452.36            | 4405.13            | 0.154                          | 978.86             | 150.28             |
| A_68_P28419968 | chr12:50486468-50486512                           | NM_008241:2497          | Foxg1         | INSIDE                 | 0.085                                                        | 0.715                          | 3350.25            | 2393.93            | 0.061                          | 2453.86            | 149.14             |
| A_68_P26844443 | chr9:114310274-114310318                          | NM_009752:60            | Gib1          | INSIDE                 | 0.085                                                        | 0.667                          | 4000.44            | 2667.31            | 0.056                          | 3204.12            | 180.90             |
| A_68_P32385499 | chrX:50410041-50410085                            | NR_029756:-2536         | Mir322        | PROMOTER               | 0.085                                                        | 5.460                          | 8292.22            | 45276.10           | 0.462                          | 3869.76            | 1788.41            |
| A_68_P32239400 | chrX:7215668-7215712                              | NM_009305:-15           | Syp           | PROMOTER               | 0.085                                                        | 1.890                          | 8689.40            | 16423.24           | 0.161                          | 3233.06            | 521.89             |
| A_68_P32340124 | chrX:39264668-39264712                            | NM_001033422:388        | Thoc2         | INSIDE                 | 0.085                                                        | 2.072                          | 1610.88            | 3338.30            | 0.176                          | 677.99             | 119.38             |
| A_68_P30959121 | chr16:90810687-90810731                           | NM_029497:-50           | Urb1          | PROMOTER               | 0.085                                                        | 0.749                          | 5604.64            | 4196.73            | 0.064                          | 3815.21            | 243.76             |
| A_68_P25581341 | chr7:147130605-147130649                          | NM_009482:872           | Utf1          | INSIDE                 | 0.085                                                        | 1.655                          | 11064.98           | 18312.08           | 0.141                          | 6853.57            | 967.55             |
| A_68_P30160396 | chr15:40486463-40486507                           | NM_011766:-103          | Zfpm2         | PROMOTER               | 0.085                                                        | 0.606                          | 3340.84            | 2023.81            | 0.052                          | 2247.96            | 115.78             |
| A_68_P29961850 | chr14:122864514-122864560                         | NM_022987:344           | Zic5          | INSIDE                 | 0.085                                                        | 1.788                          | 1092.78            | 1954.43            | 0.152                          | 792.19             | 120.29             |
| A_68_P32470552 | chrX:72341213-72341257                            | NM_001030307:42         | Dkc1          | INSIDE                 | 0.084                                                        | 1.365                          | 2697.83            | 3683.43            | 0.114                          | 1045.20            | 119.18             |
| A_68_P25087743 | chr7:51752229-51752273                            | NM_028169:293           | Fam71e1       | INSIDE                 | 0.084                                                        | 0.619                          | 4174.24            | 2584.28            | 0.052                          | 2598.44            | 135.66             |
| A_68_P26129630 | chr8:107165289-107165337                          | NM_026753:316           | Fam96b        | INSIDE                 | 0.084                                                        | 1.360                          | 1467.13            | 1995.89            | 0.114                          | 1021.51            | 116.42             |
| A_68_P31166955 | chr17:37183328-37183372                           | NM_019439:440           | Gabrr1        | INSIDE                 | 0.084                                                        | 1.401                          | 6152.17            | 8619.26            | 0.117                          | 4556.94            | 535.18             |
| A_68_P30347740 | chr15:76181682-76181726                           | NM_001164607:-19        | Maf1          | DIVERGENT_PROMOTER     | 0.084                                                        | 1.888                          | 4164.69            | 7864.25            | 0.159                          | 2780.52            | 442.59             |
| A_68_P21853525 | chr2:170336931-170336975                          | NM_001110152:223        | Pf1dn4        | INSIDE                 | 0.084                                                        | 0.631                          | 3612.00            | 2280.58            | 0.053                          | 2589.43            | 137.14             |
| A_68_P28513223 | chr12:70285038-70285082                           | NM_025589:-6            | Rpl36al       | DIVERGENT_PROMOTER     | 0.084                                                        | 0.690                          | 2835.31            | 1956.33            | 0.058                          | 2031.47            | 118.31             |
| A_68_P24245776 | chr6:13020122-13020168                            | NM_027992:386           | Tmem106b      | INSIDE                 | 0.084                                                        | 1.468                          | 2774.21            | 4072.07            | 0.124                          | 1719.67            | 213.26             |
| A_68_P32460116 | chrX:70232552-70232596                            | NM_001109043:-103       | Zfp185        | PROMOTER               | 0.084                                                        | 1.652                          | 2553.62            | 4219.84            | 0.138                          | 1147.58            | 158.86             |
| A_68_P32262594 | chrX:12164926-12164970                            | NM_027439:64            | Atp6ap2       | INSIDE                 | 0.083                                                        | 1.768                          | 3157.66            | 5582.75            | 0.147                          | 1146.07            | 168.05             |
| A_68_P30541580 | chr16:10313819-10313863                           | NM_007929:221           | Emp2          | INSIDE                 | 0.083                                                        | 1.402                          | 7452.33            | 10446.84           | 0.117                          | 5020.15            | 586.06             |
| A_68_P25520717 | chr7:137409140-137409185                          | NM_010207:1160          | Fgf2          | INSIDE                 | 0.083                                                        | 1.362                          | 2061.58            | 2807.24            | 0.113                          | 1466.40            | 165.91             |
| A_68_P27260807 | chr10:75700398-75700442                           | NM_001077638:190        | Prmt2         | INSIDE                 | 0.083                                                        | 0.601                          | 3581.04            | 2152.35            | 0.050                          | 2395.19            | 119.62             |
| A_68_P32747588 | chrX:148451460-148451504                          | NM_019710:512           | Smc1a         | INSIDE                 | 0.083                                                        | 2.064                          | 2069.27            | 4271.13            | 0.171                          | 779.51             | 133.28             |
| A_68_P32488665 | chrX:78316348-78316392                            | NM_138751:388           | Tmem47        | INSIDE                 | 0.083                                                        | 2.290                          | 4701.99            | 10769.55           | 0.190                          | 1725.36            | 328.11             |
| A_68_P32289747 | chrX:20281555-20281599                            | NM_145628:542           | Usp11         | INSIDE                 | 0.083                                                        | 1.484                          | 3365.04            | 4992.15            | 0.123                          | 1300.83            | 159.74             |
| A_68_P20335677 | chr1:72282883-72282927                            | ENSMUST00000147711:-134 |               | PROMOTER               | 0.083                                                        | 1.395                          | 1509.58            | 2105.80            | 0.115                          | 1015.93            | 117.27             |
| A_68_P23756658 | chr5:65883543-65883594                            | NM_133697:506           | 1110003E01Rik | INSIDE                 | 0.082                                                        | 1.376                          | 1428.44            | 1965.72            | 0.113                          | 1055.44            | 119.46             |
| A_68_P29863081 | chr14:103380685-103380729                         | NM_177715:1148          | Ketd12        | INSIDE                 | 0.082                                                        | 0.624                          | 3074.56            | 1918.04            | 0.051                          | 2306.57            | 117.81             |
| A_68_P24758234 | chr6:113187868-113187912                          | NM_026849:54            | Mtmr14        | INSIDE                 | 0.082                                                        | 0.677                          | 2866.59            | 1939.61            | 0.055                          | 2176.18            | 120.56             |
| A_68_P20354544 | chr1:75501965-75502010                            | NM_178884:1040          | Obs1          | INSIDE                 | 0.082                                                        | 0.567                          | 3667.31            | 2080.00            | 0.046                          | 2724.69            | 126.61             |
| A_68_P31096050 | chr17:24343435-24343480                           | NM_001163847:-950       | Tbc1d24       | PROMOTER               | 0.082                                                        | 0.687                          | 3700.30            | 2541.32            | 0.056                          | 2675.83            | 150.10             |
| A_68_P24005588 | chr5:115158042-115158088                          | NM_029992:277           | Tchp          | INSIDE                 | 0.082                                                        | 0.733                          | 2868.20            | 2103.62            | 0.060                          | 2061.91            | 124.42             |
| A_68_P31675571 | chr18:46358139-46358185                           | NM_001170855:310        | Trim36        | INSIDE                 | 0.082                                                        | 0.694                          | 2673.28            | 1855.88            | 0.057                          | 2181.95            | 123.51             |
| A_68_P31715738 | chr18:54022583-54022627                           | NM_152809:838           | Csnk1g3       | INSIDE                 | 0.081                                                        | 1.393                          | 8923.58            | 12431.41           | 0.113                          | 5833.60            | 656.68             |
| A_68_P23807225 | chr5:75471780-75471824                            | NM_133256:177           | Gsx2          | INSIDE                 | 0.081                                                        | 0.449                          | 4540.07            | 2039.43            | 0.037                          | 3157.80            | 115.28             |
| A_68_P23334804 | chr4:136157993-136158037                          | NM_133872:624           | Kdmla         | INSIDE                 | 0.081                                                        | 0.574                          | 4248.67            | 2438.37            | 0.047                          | 3328.66            | 155.49             |

| ProbeName      | Target position of probe on CpG island microarray | TargetID                 | GeneSymbol | CpG island Description | Ratio of relative methylation (TiO <sub>2</sub> -NP/Vehicle) | Sham group                     |                    |                    | TiO <sub>2</sub> -H group      |                    |                    |
|----------------|---------------------------------------------------|--------------------------|------------|------------------------|--------------------------------------------------------------|--------------------------------|--------------------|--------------------|--------------------------------|--------------------|--------------------|
|                |                                                   |                          |            |                        |                                                              | Relative methylation (Cy5/Cy3) | Cy3 signal (Input) | Cy5 signal (MeDIP) | Relative methylation (Cy5/Cy3) | Cy3 signal (Input) | Cy5 signal (MeDIP) |
| A_68_P21820676 | chr2:164774969-164775013                          | NM_013599:1240           | Mmp9       | INSIDE                 | 0.081                                                        | 1.346                          | 3257.25            | 4385.41            | 0.110                          | 2138.71            | 234.40             |
| A_68_P24040027 | chr5:121099008-121099052                          | NM_013832:200            | Rasal1     | INSIDE                 | 0.081                                                        | 2.528                          | 1026.21            | 2594.46            | 0.204                          | 595.00             | 121.17             |
| A_68_P27468585 | chr10:114688513-114688557                         | NM_025706:15             | Tbc1d15    | INSIDE                 | 0.081                                                        | 1.643                          | 1762.21            | 2894.45            | 0.133                          | 1156.78            | 153.80             |
| A_68_P21104600 | chr2:30532803-30532848                            | ENSMUST00000147959:-7397 |            | PROMOTER               | 0.081                                                        | 1.414                          | 3899.92            | 5513.40            | 0.115                          | 2549.52            | 293.41             |
| A_68_P20101397 | chr1:25887463-25887509                            | NM_175642:-934           | Bai3       | PROMOTER               | 0.080                                                        | 0.599                          | 3280.46            | 1965.75            | 0.048                          | 2529.25            | 121.29             |
| A_68_P23103963 | chr4:91067208-91067252                            | NM_207685:-555           | Elavl2     | PROMOTER               | 0.080                                                        | 0.639                          | 3163.57            | 2021.53            | 0.051                          | 2263.49            | 115.40             |
| A_68_P25181447 | chr7:72301734-72301778                            | NM_183087:-342           | Fam189a1   | PROMOTER               | 0.080                                                        | 0.622                          | 4566.13            | 2839.35            | 0.050                          | 3019.94            | 150.74             |
| A_68_P23297198 | chr4:129219482-129219532                          | NM_008228:384            | Hdac1      | INSIDE                 | 0.080                                                        | 1.379                          | 1454.66            | 2006.33            | 0.110                          | 1059.73            | 116.49             |
| A_68_P23198686 | chr4:108673421-108673465                          | NM_146150:33             | Nrd1       | INSIDE                 | 0.080                                                        | 0.626                          | 3248.33            | 2032.43            | 0.050                          | 2490.66            | 124.05             |
| A_68_P31827294 | chr18:73863805-73863852                           | NM_008540:-433           | Smad4      | PROMOTER               | 0.080                                                        | 0.742                          | 2742.81            | 2035.67            | 0.059                          | 2018.84            | 119.36             |
| A_68_P26872171 | chr9:119312063-119312107                          | NM_007397:466            | Acvr2b     | INSIDE                 | 0.079                                                        | 0.717                          | 2617.25            | 1877.42            | 0.057                          | 2058.02            | 117.29             |
| A_68_P21761658 | chr2:154483094-154483138                          | NM_029362:355            | Chmp4b     | INSIDE                 | 0.079                                                        | 0.435                          | 4970.80            | 2162.56            | 0.034                          | 3535.80            | 121.94             |
| A_68_P28833511 | chr13:12742044-12742088                           | NR_003568:596            | Gpr137b-ps | INSIDE                 | 0.079                                                        | 0.555                          | 4116.48            | 2283.77            | 0.044                          | 3162.14            | 138.51             |
| A_68_P31487964 | chr18:10029653-10029701                           | NM_001038589:471         | Usp14      | INSIDE                 | 0.079                                                        | 1.842                          | 6195.31            | 11413.37           | 0.145                          | 4093.49            | 592.67             |
| A_68_P32363625 | chrX:45609838-45609889                            | NM_028276:-247           | Utp14a     | PROMOTER               | 0.079                                                        | 3.156                          | 1161.87            | 3666.93            | 0.248                          | 518.54             | 128.66             |
| A_68_P30503505 | chr15:103153548-103153598                         | NM_013866:16945          | Zfp385a    | INSIDE                 | 0.079                                                        | 2.034                          | 4335.45            | 8817.79            | 0.160                          | 2853.66            | 457.12             |
| A_68_P22546441 | chr3:133899193-133899237                          | NM_001004367:-3897       | Cxxc4      | PROMOTER               | 0.078                                                        | 0.749                          | 4240.34            | 3178.10            | 0.058                          | 2918.18            | 169.53             |
| A_68_P30588475 | chr16:20611479-20611531                           | NM_025462:-169           | Eec2       | DIVERGENT_PROMOTER     | 0.078                                                        | 0.723                          | 3023.77            | 2184.80            | 0.056                          | 2057.09            | 116.13             |
| A_68_P30221120 | chr15:53177342-53177386                           | NM_010162:374            | Ext1       | INSIDE                 | 0.078                                                        | 0.582                          | 3731.61            | 2170.97            | 0.045                          | 2615.44            | 118.71             |
| A_68_P28083515 | chr11:102993907-102993951                         | NM_001130516:-724        | Hexim2     | PROMOTER               | 0.078                                                        | 1.695                          | 2730.81            | 4628.89            | 0.132                          | 1621.76            | 214.70             |
| A_68_P31826517 | chr18:73733495-73733539                           | NM_001039214:1158        | Mex3c      | INSIDE                 | 0.078                                                        | 1.399                          | 2843.39            | 3978.71            | 0.110                          | 1972.83            | 216.63             |
| A_68_P27838147 | chr11:59476518-59476570                           | NM_012027:548            | Mprip      | INSIDE                 | 0.078                                                        | 1.462                          | 1401.86            | 2049.00            | 0.114                          | 1050.26            | 120.02             |
| A_68_P31252241 | chr17:55851663-55851707                           | NM_028370:242            | Pot1b      | INSIDE                 | 0.078                                                        | 0.678                          | 4114.54            | 2791.39            | 0.053                          | 2979.72            | 157.39             |
| A_68_P28988730 | chr13:43266919-43266963                           | NM_025935:-212           | Tbc1d7     | PROMOTER               | 0.078                                                        | 0.624                          | 3490.74            | 2177.97            | 0.049                          | 2524.62            | 122.59             |
| A_68_P28729928 | chr12:110032252-110032296                         | NM_009537:754            | Yy1        | INSIDE                 | 0.078                                                        | 0.702                          | 3053.77            | 2143.40            | 0.054                          | 2223.67            | 121.00             |
| A_68_P24537469 | chr6:71583121-71583165                            | NM_001038695:-243        | Kdm3a      | PROMOTER               | 0.077                                                        | 1.350                          | 4220.43            | 5698.05            | 0.104                          | 2899.62            | 300.82             |
| A_68_P23298327 | chr4:129420133-129420178                          | NM_011317:-629           | Khdrbs1    | PROMOTER               | 0.077                                                        | 1.406                          | 1879.44            | 2643.30            | 0.109                          | 1298.73            | 141.46             |
| A_68_P32240001 | chrX:7327551-7327595                              | NR_030454:-2642          | Mir684-1   | DIVERGENT_PROMOTER     | 0.077                                                        | 2.605                          | 4060.53            | 10578.59           | 0.200                          | 1527.46            | 304.95             |
| A_68_P22357701 | chr3:97817894-97817938                            | NM_010928:456            | Notch2     | INSIDE                 | 0.077                                                        | 0.623                          | 3547.43            | 2209.09            | 0.048                          | 2398.52            | 115.09             |
| A_68_P32465511 | chrX:71167531-71167575                            | NM_001164704:8637        | Renbp      | INSIDE                 | 0.077                                                        | 1.563                          | 2571.84            | 4020.36            | 0.120                          | 1067.20            | 127.67             |
| A_68_P32321655 | chrX:34625187-34625231                            | NM_026055:-29            | Rpl39      | PROMOTER               | 0.077                                                        | 1.761                          | 2145.06            | 3777.63            | 0.135                          | 881.35             | 118.80             |
| A_68_P28818473 | chr13:9762982-9763026                             | NM_001199141:1556        | Zmynd11    | INSIDE                 | 0.077                                                        | 0.664                          | 5357.19            | 3558.42            | 0.051                          | 3894.44            | 200.43             |
| A_68_P23588844 | chr5:33775994-33776042                            | ENSMUST0000030994:-2174  |            | PROMOTER               | 0.077                                                        | 1.547                          | 1438.65            | 2225.51            | 0.119                          | 1007.79            | 120.30             |
| A_68_P27889189 | chr11:68213605-68213649                           | ENSMUST00000108674:699   |            | INSIDE                 | 0.077                                                        | 0.553                          | 3545.26            | 1961.80            | 0.042                          | 2749.14            | 116.61             |
| A_68_P23576981 | chr5:31495306-31495353                            | NM_001127355:183         | Eif2b4     | INSIDE                 | 0.076                                                        | 0.575                          | 3657.33            | 2104.26            | 0.044                          | 2694.09            | 118.19             |
| A_68_P26375217 | chr9:27108097-27108141                            | NM_001033323:1306        | Igsf9b     | INSIDE                 | 0.076                                                        | 0.581                          | 3690.51            | 2144.89            | 0.044                          | 2698.86            | 118.66             |
| A_68_P24155791 | chr5:144031328-144031372                          | NM_017467:351            | Zfp316     | INSIDE                 | 0.076                                                        | 0.449                          | 4921.70            | 2209.77            | 0.034                          | 3505.98            | 119.72             |
| A_68_P31899539 | chr18:86881114-86881158                           | NM_172633:-1303          | Cbln2      | PROMOTER               | 0.075                                                        | 2.705                          | 5819.18            | 15742.21           | 0.203                          | 3236.54            | 658.59             |
| A_68_P22968878 | chr4:62875674-62875718                            | NM_025685:-749           | Col27a1    | PROMOTER               | 0.075                                                        | 1.634                          | 2729.17            | 4459.20            | 0.122                          | 1704.67            | 207.86             |
| A_68_P32183081 | chr19:53604393-53604437                           | NM_001085390:607         | Dusp5      | INSIDE                 | 0.075                                                        | 1.453                          | 1606.62            | 2334.21            | 0.110                          | 1087.04            | 119.17             |
| A_68_P31980262 | chr19:16511319-16511363                           | NM_008137:1184           | Gna14      | INSIDE                 | 0.075                                                        | 0.685                          | 3023.98            | 2070.76            | 0.051                          | 2280.64            | 117.31             |
| A_68_P32672782 | chrX:131135885-131135929                          | NM_019868:82             | Hnrnp2     | INSIDE                 | 0.075                                                        | 2.992                          | 5115.46            | 15306.29           | 0.225                          | 2082.20            | 468.59             |
| A_68_P23391249 | chr4:147279034-147279078                          | NM_133201:-128           | Mfn2       | PROMOTER               | 0.075                                                        | 0.741                          | 3922.36            | 2905.25            | 0.056                          | 2626.60            | 146.34             |
| A_68_P31023476 | chr17:7165875-7165919                             | NM_147155:-391           | Tagap1     | PROMOTER               | 0.075                                                        | 0.662                          | 10591.97           | 7015.01            | 0.050                          | 7779.16            | 388.33             |
| A_68_P21106324 | chr2:30837544-30837588                            | NM_144885:-105           | BC005624   | DIVERGENT_PROMOTER     | 0.074                                                        | 0.699                          | 4223.37            | 2950.23            | 0.052                          | 2853.65            | 147.36             |
| A_68_P23767820 | chr5:67817841-67817885                            | NM_001164806:1176        | Bend4      | INSIDE                 | 0.074                                                        | 2.214                          | 4749.84            | 10514.43           | 0.165                          | 2920.32            | 480.52             |
| A_68_P26555224 | chr9:59598868-59598912                            | NM_173018:-90            | Myo9a      | DIVERGENT_PROMOTER     | 0.074                                                        | 0.531                          | 4461.33            | 2370.67            | 0.039                          | 3225.68            | 126.42             |
| A_68_P32403906 | chrX:55284045-55284104                            | NM_009575:270            | Zic3       | INSIDE                 | 0.074                                                        | 4.497                          | 1428.96            | 6425.88            | 0.331                          | 542.29             | 179.57             |
| A_68_P23237067 | chr4:117559785-117559829                          | NM_033617:128            | Atp6v0b    | INSIDE                 | 0.073                                                        | 0.749                          | 4477.31            | 3352.79            | 0.055                          | 2996.22            | 163.37             |
| A_68_P28513757 | chr12:70398282-70398327                           | NM_027117:637            | Klhdc2     | INSIDE                 | 0.073                                                        | 3.260                          | 3464.37            | 11292.49           | 0.239                          | 2091.29            | 499.84             |
| A_68_P31556969 | chr18:23962757-23962801                           | NM_153058:308            | Mapre2     | INSIDE                 | 0.073                                                        | 1.884                          | 6992.76            | 13172.49           | 0.138                          | 4524.25            | 623.56             |

| ProbeName      | Target position of probe on CpG island microarray | TargetID               | GeneSymbol    | CpG island Description | Ratio of relative methylation (TiO <sub>2</sub> -NP/Vehicle) | Sham group                     |                    |                    | TiO <sub>2</sub> -H group      |                    |                    |
|----------------|---------------------------------------------------|------------------------|---------------|------------------------|--------------------------------------------------------------|--------------------------------|--------------------|--------------------|--------------------------------|--------------------|--------------------|
|                |                                                   |                        |               |                        |                                                              | Relative methylation (Cy5/Cy3) | Cy3 signal (Input) | Cy5 signal (MeDIP) | Relative methylation (Cy5/Cy3) | Cy3 signal (Input) | Cy5 signal (MeDIP) |
| A_68_P32375460 | chrX:48558753-48558797                            | NM_134163:235          | Mbnl3         | INSIDE                 | 0.073                                                        | 1.444                          | 3023.47            | 4366.83            | 0.106                          | 1085.52            | 115.03             |
| A_68_P20560376 | chr1:122017920-122017975                          | NM_001172074:184       | 3110009E18Rik | INSIDE                 | 0.072                                                        | 1.646                          | 1745.17            | 2873.17            | 0.118                          | 1163.32            | 137.64             |
| A_68_P32241629 | chrX:7651043-7651087                              | NM_011514:822          | Suv39h1       | INSIDE                 | 0.072                                                        | 1.414                          | 2929.62            | 4142.89            | 0.102                          | 1185.63            | 120.42             |
| A_68_P27985539 | chr11:85646087-85646145                           | NM_009324:0            | Tbx2          | INSIDE                 | 0.072                                                        | 1.485                          | 1523.17            | 2261.27            | 0.107                          | 1092.65            | 116.97             |
| A_68_P29346589 | chr13:115249074-115249124                         | NM_008046:-160         | Fst           | PROMOTER               | 0.071                                                        | 1.475                          | 1858.64            | 2741.70            | 0.105                          | 1247.68            | 130.53             |
| A_68_P22964956 | chr4:62185874-62185918                            | NM_021498:152          | Pole3         | INSIDE                 | 0.071                                                        | 1.756                          | 4791.00            | 8414.54            | 0.125                          | 3104.51            | 389.18             |
| A_68_P27365025 | chr10:94878000-94878046                           | NM_001168657:-105      | Socs2         | PROMOTER               | 0.071                                                        | 1.614                          | 1570.75            | 2535.47            | 0.115                          | 1049.86            | 120.93             |
| A_68_P23332903 | chr4:135804530-135804574                          | NM_011542:681          | Teca3         | INSIDE                 | 0.071                                                        | 1.422                          | 4105.23            | 5839.24            | 0.101                          | 2502.04            | 252.30             |
| A_68_P32589660 | chrX:105011451-105011503                          | NM_025921:197          | 2610002M06Rik | INSIDE                 | 0.070                                                        | 2.499                          | 2043.26            | 5105.76            | 0.175                          | 685.55             | 119.65             |
| A_68_P22398706 | chr3:105508483-105508532                          | NM_001163356:132       | 6530418L21Rik | INSIDE                 | 0.070                                                        | 1.990                          | 1457.80            | 2901.24            | 0.139                          | 890.76             | 123.87             |
| A_68_P20858579 | chr1:179187522-179187574                          | NM_011785:-8650        | Akt3          | PROMOTER               | 0.070                                                        | 1.543                          | 4336.99            | 6692.37            | 0.108                          | 2838.08            | 305.62             |
| A_68_P32328375 | chrX:35918239-35918283                            | NM_001110142:11113     | Cul4b         | INSIDE                 | 0.070                                                        | 2.613                          | 4453.97            | 11636.75           | 0.184                          | 1912.55            | 351.27             |
| A_68_P21433078 | chr2:93028237-93028293                            | NM_001025246:524       | Trp53i11      | INSIDE                 | 0.070                                                        | 1.431                          | 1844.01            | 2638.20            | 0.100                          | 1150.48            | 114.97             |
| A_68_P28936822 | chr13:34222312-34222356                           | NM_023716:-111         | Tubb2b        | PROMOTER               | 0.070                                                        | 1.945                          | 5328.16            | 10364.36           | 0.137                          | 3246.00            | 445.09             |
| A_68_P27266466 | chr10:76628787-76628837                           | NM_009929:463          | Col18a1       | INSIDE                 | 0.069                                                        | 2.104                          | 3474.49            | 7308.83            | 0.145                          | 2390.09            | 346.92             |
| A_68_P31849792 | chr18:78033867-78033918                           | NM_013831:604          | Pstpip2       | INSIDE                 | 0.069                                                        | 1.383                          | 3351.66            | 4636.44            | 0.096                          | 2396.56            | 230.19             |
| A_68_P30343688 | chr15:75561991-75562035                           |                        |               | Unknown                | 0.069                                                        | 1.740                          | 5044.01            | 8778.76            | 0.120                          | 3426.96            | 409.57             |
| A_68_P21977361 | chr3:19795434-19795478                            | NR_027985:586          | 4632415L05Rik | INSIDE                 | 0.068                                                        | 0.670                          | 3689.45            | 2470.52            | 0.046                          | 2570.35            | 117.06             |
| A_68_P31097445 | chr17:24592379-24592423                           | NM_007893:-144         | E4f1          | PROMOTER               | 0.068                                                        | 0.746                          | 3145.67            | 2346.73            | 0.051                          | 2272.53            | 115.10             |
| A_68_P27289250 | chr10:80840838-80840882                           | NM_019757:255          | Fzr1          | INSIDE                 | 0.068                                                        | 1.874                          | 2237.73            | 4194.37            | 0.127                          | 1493.69            | 189.10             |
| A_68_P29269015 | chr13:101322806-101322850                         | NM_008756:-375         | Ocln          | PROMOTER               | 0.068                                                        | 1.923                          | 3702.50            | 7119.37            | 0.132                          | 2243.73            | 295.18             |
| A_68_P23271503 | chr4:124667328-124667372                          | NM_138683:3677         | Rspo1         | INSIDE                 | 0.068                                                        | 1.366                          | 4346.41            | 5935.84            | 0.092                          | 2711.92            | 250.02             |
| A_68_P20880187 | chr1:183140858-183140911                          | NM_145514:1225         | Wdr26         | INSIDE                 | 0.068                                                        | 1.852                          | 1729.94            | 3204.00            | 0.126                          | 1230.71            | 155.21             |
| A_68_P32300610 | chrX:23270059-23270108                            | NM_175180:-159         | Wdr44         | PROMOTER               | 0.068                                                        | 1.739                          | 2450.06            | 4260.32            | 0.118                          | 1028.19            | 121.48             |
| A_68_P20002773 | chr1:3662046-3662090                              | NM_001011874:-489      | Xkr4          | PROMOTER               | 0.068                                                        | 0.648                          | 3911.41            | 2534.36            | 0.044                          | 2772.36            | 121.88             |
| A_68_P21866700 | chr2:172764763-172764807                          | NM_007557:1010         | Bmp7          | INSIDE                 | 0.067                                                        | 0.581                          | 6091.26            | 3536.32            | 0.039                          | 4480.39            | 175.43             |
| A_68_P31899538 | chr18:86881037-86881081                           | NM_172633:-1381        | Cbln2         | PROMOTER               | 0.067                                                        | 1.702                          | 14900.30           | 25364.05           | 0.114                          | 9814.59            | 1123.72            |
| A_68_P24816271 | chr6:124613291-124613335                          | NM_145130:191          | Lpcat3        | INSIDE                 | 0.067                                                        | 0.552                          | 4653.68            | 2567.20            | 0.037                          | 3141.69            | 116.63             |
| A_68_P25989172 | chr8:81033404-81033456                            | NM_029736:197          | Slc10a7       | INSIDE                 | 0.067                                                        | 1.382                          | 3021.95            | 4175.13            | 0.093                          | 2170.20            | 202.18             |
| A_68_P29517797 | chr14:33276567-33276611                           | NM_021712:1448         | Slc18a3       | INSIDE                 | 0.067                                                        | 0.684                          | 4420.12            | 3025.44            | 0.046                          | 3068.08            | 140.23             |
| A_68_P27911311 | chr11:72224533-72224583                           | NM_177776:657          | Smtml2        | INSIDE                 | 0.067                                                        | 1.615                          | 2028.51            | 3276.09            | 0.108                          | 1455.58            | 157.84             |
| A_68_P28048202 | chr11:96883898-96883943                           | NM_031183:9038         | Sp6           | INSIDE                 | 0.067                                                        | 2.296                          | 2943.93            | 6759.36            | 0.154                          | 1974.68            | 304.04             |
| A_68_P32540975 | chrX:92391699-92391746                            | ENSMUST00000113884:438 |               | INSIDE                 | 0.067                                                        | 1.613                          | 3129.57            | 5049.41            | 0.108                          | 1089.45            | 118.18             |
| A_68_P24129541 | chr5:138705342-138705401                          | NM_153161:-91          | BC037034      | PROMOTER               | 0.066                                                        | 1.555                          | 1655.49            | 2573.91            | 0.102                          | 1150.94            | 117.60             |
| A_68_P27281212 | chr10:79601441-79601485                           | NM_001195268:-1330     | Dos           | PROMOTER               | 0.066                                                        | 1.344                          | 7195.75            | 9673.17            | 0.088                          | 4601.83            | 405.26             |
| A_68_P20849152 | chr1:177555795-177555846                          | NM_010209:-54          | Fhl1          | DIVERGENT_PROMOTER     | 0.066                                                        | 1.365                          | 2170.50            | 2961.80            | 0.090                          | 1673.46            | 150.99             |
| A_68_P31063011 | chr17:15115516-15115564                           | NM_001123367:236       | Gm3417        | INSIDE                 | 0.066                                                        | 0.493                          | 5097.23            | 2514.76            | 0.033                          | 3680.04            | 120.47             |
| A_68_P32465787 | chrX:71211906-71211951                            | NM_008224:-274         | Hcfc1         | PROMOTER               | 0.066                                                        | 2.773                          | 1632.69            | 4527.60            | 0.183                          | 670.10             | 122.34             |
| A_68_P25678160 | chr8:15011568-15011612                            | NM_029116:566          | Kbtbd11       | INSIDE                 | 0.066                                                        | 0.715                          | 3719.89            | 2659.04            | 0.047                          | 2653.43            | 124.50             |
| A_68_P23433043 | chr4:154010163-154010214                          | NM_001177995:794       | Prdm16        | INSIDE                 | 0.066                                                        | 0.736                          | 3679.81            | 2707.03            | 0.048                          | 2470.24            | 119.77             |
| A_68_P21628855 | chr2:130100231-130100275                          | NR_028547:-998         | Snord110      | PROMOTER               | 0.066                                                        | 0.675                          | 3651.49            | 2464.71            | 0.044                          | 2749.58            | 121.58             |
| A_68_P31259429 | chr17:57129711-57129755                           | NM_017393:46           | Clpp          | INSIDE                 | 0.065                                                        | 1.638                          | 5541.89            | 9077.77            | 0.106                          | 3565.52            | 378.50             |
| A_68_P23401327 | chr4:148961132-148961176                          | NM_023051:408          | Clstn1        | INSIDE                 | 0.065                                                        | 0.743                          | 3944.35            | 2928.84            | 0.049                          | 2517.93            | 122.15             |
| A_68_P25577541 | chr7:146574687-146574731                          | NM_001127363:-299      | Inpp5a        | PROMOTER               | 0.065                                                        | 0.647                          | 5097.15            | 3297.48            | 0.042                          | 3693.72            | 155.70             |
| A_68_P32773807 | chrX:155694248-155694292                          | NM_148945:219          | Rps6ka3       | INSIDE                 | 0.065                                                        | 1.597                          | 3251.45            | 5192.77            | 0.104                          | 1141.61            | 118.64             |
| A_68_P32786682 | chrX:158346088-158346143                          | NM_001081052:251607    | Nhs           | INSIDE                 | 0.064                                                        | 2.986                          | 2136.10            | 6377.93            | 0.192                          | 816.00             | 156.77             |
| A_68_P31631094 | chr18:38115681-38115725                           | NM_153793:490          | Rel2          | INSIDE                 | 0.064                                                        | 0.658                          | 3935.67            | 2591.41            | 0.042                          | 2784.17            | 117.36             |
| A_68_P29141940 | chr13:73901479-73901523                           | NM_011390:356          | Slc12a7       | INSIDE                 | 0.064                                                        | 0.574                          | 4587.60            | 2633.57            | 0.037                          | 3231.45            | 118.90             |
| A_68_P31247139 | chr17:54438039-54438089                           | NM_022025:295          | Slc5a7        | INSIDE                 | 0.064                                                        | 0.690                          | 3657.85            | 2522.83            | 0.044                          | 2637.98            | 116.63             |
| A_68_P30142416 | chr15:37065776-37065825                           |                        |               | Unknown                | 0.064                                                        | 1.796                          | 1274.06            | 2288.38            | 0.115                          | 1022.74            | 117.56             |
| A_68_P27795130 | chr11:51464039-51464083                           | NR_027958:-395         | D930048N14Rik | PROMOTER               | 0.063                                                        | 0.712                          | 3868.01            | 2755.52            | 0.045                          | 2649.21            | 119.65             |

| ProbeName      | Target position of probe on CpG island microarray | TargetID           | GeneSymbol    | CpG island Description | Ratio of relative methylation (TiO <sub>2</sub> -NP/Vehicle) | Sham group                     |                    |                    | TiO <sub>2</sub> -H group      |                    |                    |
|----------------|---------------------------------------------------|--------------------|---------------|------------------------|--------------------------------------------------------------|--------------------------------|--------------------|--------------------|--------------------------------|--------------------|--------------------|
|                |                                                   |                    |               |                        |                                                              | Relative methylation (Cy5/Cy3) | Cy3 signal (Input) | Cy5 signal (MeDIP) | Relative methylation (Cy5/Cy3) | Cy3 signal (Input) | Cy5 signal (MeDIP) |
| A_68_P23756666 | chr5:65884517-65884566                            | NM_133697:-467     | 1110003E01Rik | PROMOTER               | 0.062                                                        | 1.900                          | 2135.45            | 4057.75            | 0.119                          | 1475.15            | 175.18             |
| A_68_P31791363 | chr18:67503527-67503573                           | NR_033214:207      | B430212C06Rik | INSIDE                 | 0.062                                                        | 1.525                          | 1796.39            | 2738.65            | 0.095                          | 1274.39            | 120.93             |
| A_68_P25045779 | chr7:35597123-35597172                            | NM_175140:583      | Chst8         | INSIDE                 | 0.062                                                        | 0.700                          | 3530.48            | 2471.14            | 0.043                          | 2796.11            | 121.54             |
| A_68_P32730440 | chrX:143988591-143988635                          | NM_001081173:12    | Lreh2         | INSIDE                 | 0.062                                                        | 2.353                          | 2924.30            | 6880.77            | 0.146                          | 1103.33            | 161.60             |
| A_68_P25394540 | chr7:112959842-112959886                          | NM_025301:-263     | Mrpl17        | PROMOTER               | 0.062                                                        | 0.675                          | 4014.69            | 2708.01            | 0.042                          | 2894.92            | 120.14             |
| A_68_P29162267 | chr13:78334860-78334904                           | NM_010151:3361     | Nr2f1         | INSIDE                 | 0.062                                                        | 1.413                          | 7189.05            | 10158.16           | 0.088                          | 4645.59            | 408.31             |
| A_68_P21784241 | chr2:158493133-158493177                          | NM_001159662:284   | Ppp1r16b      | INSIDE                 | 0.062                                                        | 1.522                          | 5115.00            | 7784.87            | 0.095                          | 3433.40            | 324.83             |
| A_68_P29482226 | chr14:27354098-27354142                           | NM_032008:-894     | Slmap         | PROMOTER               | 0.062                                                        | 0.662                          | 5259.13            | 3482.21            | 0.041                          | 3537.96            | 144.74             |
| A_68_P25113824 | chr7:56891950-56892001                            | NM_001005232:230   | Dbx1          | INSIDE                 | 0.061                                                        | 1.479                          | 4110.71            | 6079.61            | 0.090                          | 2549.02            | 229.67             |
| A_68_P25328181 | chr7:100229343-100229387                          | NM_021427:976      | Fam181b       | INSIDE                 | 0.061                                                        | 0.716                          | 4535.13            | 3247.78            | 0.044                          | 3244.95            | 142.88             |
| A_68_P21114608 | chr2:32167860-32167904                            | NR_029811:-6097    | Mir199b       | PROMOTER               | 0.061                                                        | 0.545                          | 5383.54            | 2932.25            | 0.033                          | 3466.85            | 115.46             |
| A_68_P32289745 | chrX:20281291-20281340                            | NM_145628:281      | Usp11         | INSIDE                 | 0.061                                                        | 3.297                          | 1735.70            | 5722.13            | 0.202                          | 648.10             | 131.15             |
| A_68_P27186311 | chr10:61949916-61949968                           | NM_133672:-389     | Vps26a        | PROMOTER               | 0.061                                                        | 1.371                          | 1933.92            | 2651.77            | 0.084                          | 1414.91            | 118.56             |
| A_68_P24828002 | chr6:126593244-126593288                          | NM_010595:2553     | Kena1         | INSIDE                 | 0.060                                                        | 0.726                          | 3643.30            | 2644.31            | 0.043                          | 2703.77            | 116.95             |
| A_68_P24758833 | chr6:113277046-113277100                          | NM_010957:103      | Ogg1          | INSIDE                 | 0.060                                                        | 1.477                          | 1972.22            | 2912.53            | 0.088                          | 1364.63            | 120.44             |
| A_68_P32415812 | chrX:58146994-58147038                            | NM_009237:-411     | Sox3          | PROMOTER               | 0.060                                                        | 1.992                          | 2303.86            | 4589.02            | 0.119                          | 996.00             | 118.31             |
| A_68_P31128446 | chr17:29686489-29686534                           | NM_001162901:27    | Tmem217       | INSIDE                 | 0.060                                                        | 1.482                          | 1893.32            | 2805.17            | 0.089                          | 1368.66            | 121.21             |
| A_68_P20618262 | chr1:133806972-133807021                          | NM_001145804:-38   | Nucks1        | PROMOTER               | 0.059                                                        | 0.573                          | 4903.36            | 2808.04            | 0.034                          | 3475.83            | 116.53             |
| A_68_P32240898 | chrX:7499680-7499725                              | NM_013892:2755     | Pesk1n        | INSIDE                 | 0.059                                                        | 2.926                          | 2124.50            | 6217.11            | 0.173                          | 806.98             | 139.48             |
| A_68_P32481890 | chrX:75828993-75829037                            | NM_001164275:107   | Prrgl1        | INSIDE                 | 0.059                                                        | 1.411                          | 4045.61            | 5706.80            | 0.083                          | 1508.92            | 125.58             |
| A_68_P31620298 | chr18:35989480-35989524                           | NM_133687:31       | Cxxc5         | INSIDE                 | 0.058                                                        | 0.711                          | 6141.97            | 4366.36            | 0.041                          | 4314.31            | 177.72             |
| A_68_P28941742 | chr13:35086077-35086121                           | NM_001110331:-85   | Eci2          | PROMOTER               | 0.058                                                        | 1.647                          | 2213.86            | 3646.81            | 0.095                          | 1375.37            | 131.01             |
| A_68_P32239706 | chrX:7274518-7274562                              | NM_173747:281      | Gpkow         | INSIDE                 | 0.058                                                        | 3.468                          | 1824.03            | 6326.36            | 0.200                          | 618.74             | 124.05             |
| A_68_P24603555 | chr6:85137374-85137418                            | NM_010131:-528     | Emx1          | PROMOTER               | 0.057                                                        | 0.637                          | 4927.83            | 3140.04            | 0.036                          | 3613.56            | 131.38             |
| A_68_P26134614 | chr8:108090464-108090513                          | NM_013477:-548     | Atp6v0d1      | PROMOTER               | 0.056                                                        | 1.824                          | 1603.00            | 2924.67            | 0.103                          | 1152.37            | 118.29             |
| A_68_P31347824 | chr17:74059066-74059113                           | NM_027864:702      | Galnt14       | INSIDE                 | 0.056                                                        | 2.589                          | 4127.46            | 10686.06           | 0.144                          | 2551.03            | 367.54             |
| A_68_P30365876 | chr15:79178645-79178689                           | NM_010755:559      | Maff          | INSIDE                 | 0.056                                                        | 0.744                          | 4402.30            | 3275.28            | 0.041                          | 2943.95            | 121.66             |
| A_68_P32569611 | chrX:99839237-99839281                            | NM_008832:327      | Phka1         | INSIDE                 | 0.056                                                        | 2.794                          | 4375.23            | 12225.17           | 0.156                          | 1577.23            | 246.39             |
| A_68_P21957616 | chr3:14611261-14611305                            | NM_001099674:-26   | 1810022K09Rik | PROMOTER               | 0.055                                                        | 1.711                          | 8239.94            | 14100.84           | 0.094                          | 4815.05            | 454.13             |
| A_68_P32553707 | chrX:96332536-96332580                            | NM_010110:1090     | Efnb1         | INSIDE                 | 0.055                                                        | 2.793                          | 1851.05            | 5170.11            | 0.155                          | 777.30             | 120.18             |
| A_68_P22894260 | chr4:47365694-47365738                            | NM_009370:-460     | Tgfbf1        | PROMOTER               | 0.055                                                        | 1.745                          | 2338.09            | 4078.79            | 0.095                          | 1466.34            | 139.55             |
| A_68_P32578103 | chrX:101866009-101866059                          | NM_175358:369      | Zdhhc15       | INSIDE                 | 0.055                                                        | 2.727                          | 2259.62            | 6162.57            | 0.149                          | 806.45             | 120.13             |
| A_68_P27282601 | chr10:79805419-79805466                           | NM_001113548:5749  | Adams15       | INSIDE                 | 0.054                                                        | 2.077                          | 5997.11            | 12454.74           | 0.113                          | 3739.60            | 422.49             |
| A_68_P23767821 | chr5:67817925-67817969                            | NM_001164806:1092  | Bend4         | INSIDE                 | 0.054                                                        | 2.300                          | 6069.92            | 13961.59           | 0.124                          | 3932.74            | 487.66             |
| A_68_P29531957 | chr14:35633864-35633908                           | NM_008166:565      | Grid1         | INSIDE                 | 0.054                                                        | 1.338                          | 4410.16            | 5899.98            | 0.073                          | 2791.40            | 203.22             |
| A_68_P28043737 | chr11:96180501-96180545                           | NM_010459:942      | Hoxb4         | INSIDE                 | 0.054                                                        | 0.742                          | 4134.06            | 3067.29            | 0.040                          | 2834.86            | 114.11             |
| A_68_P32141596 | chr19:46078435-46078479                           | NM_176785:489      | Hps6          | INSIDE                 | 0.054                                                        | 0.718                          | 5887.53            | 4228.23            | 0.039                          | 4128.41            | 161.27             |
| A_68_P20852905 | chr1:178205134-178205178                          | NM_176916:287      | Pld5          | INSIDE                 | 0.054                                                        | 0.732                          | 4045.40            | 2961.82            | 0.039                          | 3061.41            | 120.17             |
| A_68_P31644533 | chr18:40378844-40378888                           | NM_023311:187      | Yipf5         | INSIDE                 | 0.054                                                        | 1.878                          | 14054.89           | 26395.33           | 0.102                          | 8501.30            | 866.43             |
| A_68_P32601450 | chrX:109009220-109009268                          | NM_010900:220      | Unknown       | Unknown                | 0.054                                                        | 2.484                          | 2369.90            | 5887.83            | 0.134                          | 884.27             | 118.77             |
| A_68_P28593011 | chr12:84827402-84827446                           | NM_058212:1234     | Dpf3          | INSIDE                 | 0.053                                                        | 1.542                          | 8286.68            | 12778.79           | 0.081                          | 5432.00            | 442.38             |
| A_68_P29696148 | chr14:70008926-70008970                           | NM_033325:-334     | Loxl2         | PROMOTER               | 0.053                                                        | 1.760                          | 4525.86            | 7966.21            | 0.092                          | 2920.66            | 269.90             |
| A_68_P27541975 | chr10:127986066-127986114                         | NM_018860:134      | Rpl41         | INSIDE                 | 0.053                                                        | 1.609                          | 2185.75            | 3517.88            | 0.085                          | 1372.94            | 116.61             |
| A_68_P27567652 | chr11:6174705-6174749                             | NM_134020:114      | Tmed4         | INSIDE                 | 0.053                                                        | 1.414                          | 2618.98            | 3702.34            | 0.075                          | 1607.48            | 120.52             |
| A_68_P20804634 | chr1:169280619-169280663                          | NM_019993:519      | Aldh9a1       | INSIDE                 | 0.052                                                        | 1.869                          | 4491.55            | 8394.50            | 0.097                          | 2920.32            | 284.26             |
| A_68_P32592615 | chrX:106029602-106029650                          | NM_001081477:68    | Brwd3         | INSIDE                 | 0.052                                                        | 2.627                          | 2774.50            | 7287.86            | 0.137                          | 861.55             | 117.82             |
| A_68_P32328377 | chrX:35918417-35918470                            | NM_001110142:10930 | Cul4b         | INSIDE                 | 0.052                                                        | 3.025                          | 1745.89            | 5281.59            | 0.156                          | 739.79             | 115.73             |
| A_68_P32798240 | chrX:16085773-160857818                           | NM_011081:77       | Piga          | INSIDE                 | 0.052                                                        | 1.666                          | 3449.95            | 5746.86            | 0.086                          | 1373.40            | 118.01             |
| A_68_P30380961 | chr15:81846636-81846680                           | NM_134095:-88      | Pppde2        | DIVERGENT_PROMOTER     | 0.052                                                        | 0.697                          | 7707.50            | 5372.11            | 0.036                          | 5343.73            | 194.99             |
| A_68_P28519208 | chr12:71328463-71328507                           | NM_133198:186      | Pygl          | INSIDE                 | 0.052                                                        | 1.798                          | 6304.49            | 11338.04           | 0.093                          | 3743.06            | 346.85             |
| A_68_P23973505 | chr5:109106557-109106601                          | NM_174870:-1910    | Ste26a1       | PROMOTER               | 0.052                                                        | 1.822                          | 1939.53            | 3534.19            | 0.094                          | 1277.76            | 120.45             |

| ProbeName      | Target position of probe on CpG island microarray | TargetID                | GeneSymbol    | CpG island Description | Ratio of relative methylation (TiO <sub>2</sub> -NP/Vehicle) | Sham group                     |                    |                    | TiO <sub>2</sub> -H group      |                    |                    |
|----------------|---------------------------------------------------|-------------------------|---------------|------------------------|--------------------------------------------------------------|--------------------------------|--------------------|--------------------|--------------------------------|--------------------|--------------------|
|                |                                                   |                         |               |                        |                                                              | Relative methylation (Cy5/Cy3) | Cy3 signal (Input) | Cy5 signal (MeDIP) | Relative methylation (Cy5/Cy3) | Cy3 signal (Input) | Cy5 signal (MeDIP) |
| A_68_P27534513 | chr10:126626792-126626847                         | NM_001166413:60         | Arhgef25      | INSIDE                 | 0.051                                                        | 1.389                          | 2672.40            | 3710.76            | 0.071                          | 1699.16            | 120.72             |
| A_68_P26920732 | chr10:7500225-7500275                             | NM_145418:465           | BC013529      | INSIDE                 | 0.051                                                        | 0.720                          | 4171.11            | 3004.32            | 0.037                          | 3130.63            | 114.96             |
| A_68_P31207500 | chr17:46683388-46683432                           | NM_001081335:-73        | Cul9          | PROMOTER               | 0.051                                                        | 2.117                          | 3755.77            | 7950.94            | 0.108                          | 2256.59            | 243.96             |
| A_68_P31545966 | chr18:21811604-21811648                           | NM_001081403:-757       | Klhl14        | PROMOTER               | 0.051                                                        | 1.495                          | 4721.84            | 7059.15            | 0.076                          | 3244.50            | 247.11             |
| A_68_P25091647 | chr7:52436916-52436960                            | NM_053256:574           | Pth2          | INSIDE                 | 0.051                                                        | 1.638                          | 5199.99            | 8515.05            | 0.083                          | 3282.43            | 273.82             |
| A_68_P27827732 | chr11:57641072-57641118                           | NM_008213:4555          | Hand1         | DOWNSTREAM             | 0.050                                                        | 1.535                          | 4642.97            | 7127.85            | 0.077                          | 2995.31            | 230.27             |
| A_68_P23088443 | chr4:87677902-87677949                            | NM_027326:1386          | Mllt3         | INSIDE                 | 0.050                                                        | 1.378                          | 3132.38            | 4315.93            | 0.069                          | 2132.62            | 147.74             |
| A_68_P24951861 | chr7:5012862-5012906                              | NM_001205231:-860       | U2af2         | PROMOTER               | 0.050                                                        | 1.386                          | 5584.12            | 7737.96            | 0.069                          | 3565.50            | 246.70             |
| A_68_P26234307 | chr8:125100918-125100973                          | NM_009698:-138          | Aprt          | PROMOTER               | 0.049                                                        | 1.853                          | 2008.98            | 3722.06            | 0.091                          | 1303.90            | 119.25             |
| A_68_P32136351 | chr19:45155030-45155086                           | NM_178929:4430          | Kazald1       | DOWNSTREAM             | 0.049                                                        | 1.432                          | 2706.42            | 3875.13            | 0.070                          | 1917.99            | 135.00             |
| A_68_P27899593 | chr11:70043429-70043486                           | NM_007528:-157          | Bcl6b         | DIVERGENT_PROMOTER     | 0.048                                                        | 1.531                          | 2278.22            | 3486.99            | 0.073                          | 1668.41            | 122.14             |
| A_68_P32319275 | chrX:34138849-34138893                            | NM_016783:651           | Pgrmc1        | INSIDE                 | 0.048                                                        | 4.730                          | 1509.48            | 7140.44            | 0.225                          | 545.32             | 122.94             |
| A_68_P25411544 | chr7:117205106-117205158                          | NM_009281:-83           | Zfp143        | PROMOTER               | 0.048                                                        | 1.934                          | 1882.54            | 3640.72            | 0.092                          | 1349.52            | 124.02             |
| A_68_P32260272 | chrX:11657098-11657142                            | NM_029510:559           | Bcor          | INSIDE                 | 0.047                                                        | 1.527                          | 7364.88            | 11244.67           | 0.072                          | 2313.39            | 167.32             |
| A_68_P20768471 | chr1:162722421-162722468                          | NM_013862:625           | Rabgap11      | INSIDE                 | 0.047                                                        | 1.347                          | 2476.00            | 3334.55            | 0.064                          | 1913.93            | 122.20             |
| A_68_P32240694 | chrX:7461707-7461754                              | NM_001083937:361        | Slc35a2       | INSIDE                 | 0.047                                                        | 2.503                          | 2768.65            | 6928.78            | 0.116                          | 1019.91            | 118.76             |
| A_68_P32651796 | chrX:126284437-126284481                          | NM_172493:181           | Diap2         | INSIDE                 | 0.046                                                        | 2.019                          | 3296.73            | 6655.66            | 0.094                          | 1263.70            | 118.38             |
| A_68_P31256434 | chr17:56615114-56615158                           | NM_011218:767           | Ptprs         | INSIDE                 | 0.046                                                        | 1.406                          | 10793.29           | 15174.52           | 0.064                          | 6437.47            | 412.14             |
| A_68_P29575957 | chr14:47007792-47007836                           | NM_007554:2460          | Bmp4          | INSIDE                 | 0.045                                                        | 1.669                          | 5683.48            | 9482.93            | 0.075                          | 3733.09            | 279.16             |
| A_68_P32380515 | chrX:49518249-49518293                            | NM_008150:-170          | Gpc4          | PROMOTER               | 0.045                                                        | 2.950                          | 2257.23            | 6658.92            | 0.134                          | 890.06             | 118.95             |
| A_68_P31631084 | chr18:38114429-38114473                           | NM_010411:192           | Hdac3         | INSIDE                 | 0.045                                                        | 2.035                          | 2056.96            | 4186.80            | 0.091                          | 1314.65            | 119.16             |
| A_68_P27992600 | chr11:86923122-86923170                           | NR_029652:-3359         | Mir301        | PROMOTER               | 0.045                                                        | 2.344                          | 1719.34            | 4029.52            | 0.107                          | 1095.49            | 116.69             |
| A_68_P27536452 | chr10:126971104-126971148                         | NM_183297:489           | Nxph4         | INSIDE                 | 0.045                                                        | 1.402                          | 12909.02           | 18098.38           | 0.064                          | 7582.89            | 483.68             |
| A_68_P29249243 | chr13:97842140-97842199                           | NM_001100458:572        | Fam169a       | INSIDE                 | 0.044                                                        | 1.885                          | 2079.58            | 3920.02            | 0.084                          | 1622.84            | 135.71             |
| A_68_P26022753 | chr8:87461135-87461179                            | NM_019945:96            | Mast1         | INSIDE                 | 0.044                                                        | 1.797                          | 5022.41            | 9027.06            | 0.078                          | 3037.14            | 237.70             |
| A_68_P32598389 | chrX:108010047-108010091                          | NM_008901:265           | Pou3f4        | INSIDE                 | 0.044                                                        | 5.620                          | 6802.72            | 38228.22           | 0.246                          | 2678.51            | 659.05             |
| A_68_P21566789 | chr2:118726839-118726885                          | NM_001045523:-488       | Bahd1         | PROMOTER               | 0.043                                                        | 4.027                          | 1664.43            | 6703.31            | 0.172                          | 953.62             | 164.43             |
| A_68_P21094090 | chr2:28765327-28765371                            | NM_019446:6593          | Barhl1        | INSIDE                 | 0.042                                                        | 1.337                          | 3319.03            | 4438.08            | 0.057                          | 2144.44            | 121.85             |
| A_68_P31259430 | chr17:57129793-57129837                           | NM_017393:128           | Clpp          | INSIDE                 | 0.042                                                        | 1.585                          | 6366.32            | 10088.04           | 0.067                          | 3872.02            | 259.37             |
| A_68_P24138250 | chr5:140383933-140383977                          | NM_175522:58            | Elfn1         | INSIDE                 | 0.042                                                        | 1.584                          | 2700.46            | 4277.88            | 0.066                          | 1760.59            | 116.87             |
| A_68_P26152542 | chr8:111238708-111238758                          | NM_007496:189           | Zfx3          | INSIDE                 | 0.042                                                        | 1.352                          | 3471.69            | 4694.99            | 0.057                          | 2100.28            | 120.40             |
| A_68_P28271876 | chr12:17697378-17697423                           | NM_016677:-219          | Hpcal1        | PROMOTER               | 0.041                                                        | 1.988                          | 2184.05            | 4341.67            | 0.082                          | 1451.54            | 118.99             |
| A_68_P30633253 | chr16:28929529-28929575                           | NM_177718:232           | 1600021P15Rik | INSIDE                 | 0.040                                                        | 3.548                          | 1827.40            | 6483.44            | 0.143                          | 1069.02            | 152.71             |
| A_68_P30381577 | chr15:81958707-81958759                           | NM_172428:381           | Ccdc134       | INSIDE                 | 0.040                                                        | 1.497                          | 3033.92            | 4542.02            | 0.060                          | 2027.68            | 122.01             |
| A_68_P32395899 | chrX:53708448-53708501                            | NM_172779:459           | Ddx26b        | INSIDE                 | 0.039                                                        | 5.109                          | 2071.50            | 10583.14           | 0.199                          | 581.42             | 115.63             |
| A_68_P31151052 | chr17:34067414-34067462                           | NM_009059:600           | Rgl2          | INSIDE                 | 0.039                                                        | 4.551                          | 5324.40            | 24230.36           | 0.179                          | 3132.35            | 559.83             |
| A_68_P22903293 | chr4:49072217-49072261                            | NM_178756:-95           | E130309F12Rik | PROMOTER               | 0.038                                                        | 1.987                          | 5573.01            | 11074.82           | 0.075                          | 3841.46            | 287.20             |
| A_68_P25289617 | chr7:91754287-91754332                            | NM_010176:143           | Fah           | INSIDE                 | 0.038                                                        | 1.364                          | 3888.45            | 5304.05            | 0.052                          | 2397.88            | 124.31             |
| A_68_P25959941 | chr8:74685000-74685047                            | NM_023126:-75           | Rab8a         | PROMOTER               | 0.038                                                        | 1.500                          | 3214.79            | 4822.37            | 0.056                          | 2138.57            | 120.77             |
| A_68_P22129177 | chr3:51145110-51145166                            | ENSMUST00000135496:-558 |               | PROMOTER               | 0.038                                                        | 1.817                          | 2836.78            | 5153.90            | 0.070                          | 1736.93            | 120.85             |
| A_68_P32395900 | chrX:53708549-53708594                            | NM_172779:556           | Ddx26b        | INSIDE                 | 0.037                                                        | 3.030                          | 3147.19            | 9535.48            | 0.111                          | 1084.40            | 120.86             |
| A_68_P32742985 | chrX:147247678-147247726                          | NM_001199246:544        | Maged2        | INSIDE                 | 0.037                                                        | 3.682                          | 2465.96            | 9080.68            | 0.135                          | 876.03             | 117.91             |
| A_68_P32601449 | chrX:109009111-109009155                          |                         |               | Unknown                | 0.037                                                        | 3.293                          | 3989.37            | 13136.78           | 0.123                          | 1447.47            | 178.03             |
| A_68_P31150915 | chr17:34046487-34046531                           | NM_001199733:-37        | Daxx          | PROMOTER               | 0.036                                                        | 1.513                          | 3355.42            | 5076.31            | 0.054                          | 2218.99            | 120.83             |
| A_68_P32746464 | chrX:148238102-148238146                          | NM_021523:300           | Huwe1         | INSIDE                 | 0.036                                                        | 2.197                          | 4454.26            | 9785.52            | 0.079                          | 1640.12            | 129.40             |
| A_68_P26348961 | chr9:21602785-21602833                            | NM_145611:182           | Kank2         | INSIDE                 | 0.035                                                        | 1.396                          | 6997.57            | 9770.96            | 0.049                          | 4304.21            | 209.97             |
| A_68_P30207180 | chr15:50721578-50721632                           | NM_032000:-17           | Trps1         | PROMOTER               | 0.035                                                        | 1.391                          | 3787.97            | 5268.18            | 0.049                          | 2339.62            | 114.92             |
| A_68_P24951860 | chr7:5012759-5012803                              | NM_001205231:-964       | U2af2         | PROMOTER               | 0.035                                                        | 1.731                          | 3897.00            | 6746.08            | 0.061                          | 2578.09            | 157.88             |
| A_68_P24637122 | chr6:91107049-91107096                            | NM_144919:264           | Hdac11        | INSIDE                 | 0.034                                                        | 1.864                          | 2902.03            | 5408.58            | 0.064                          | 1920.46            | 122.60             |
| A_68_P21105302 | chr2:30656577-30656621                            | NM_198000:629           | 1700001O22Rik | INSIDE                 | 0.033                                                        | 3.922                          | 16457.71           | 64553.78           | 0.130                          | 10033.62           | 1305.90            |
| A_68_P31899540 | chr18:86881200-86881249                           | NM_172633:-1215         | Cbln2         | PROMOTER               | 0.033                                                        | 3.469                          | 1983.08            | 6878.59            | 0.114                          | 1062.30            | 120.80             |

| ProbeName      | Target position of probe on CpG island microarray | TargetID                | GeneSymbol    | CpG island Description | Ratio of relative methylation (TiO <sub>2</sub> -NP/Vehicle) | Sham group                     |                    |                    | TiO <sub>2</sub> -H group      |                    |                    |
|----------------|---------------------------------------------------|-------------------------|---------------|------------------------|--------------------------------------------------------------|--------------------------------|--------------------|--------------------|--------------------------------|--------------------|--------------------|
|                |                                                   |                         |               |                        |                                                              | Relative methylation (Cy5/Cy3) | Cy3 signal (Input) | Cy5 signal (MeDIP) | Relative methylation (Cy5/Cy3) | Cy3 signal (Input) | Cy5 signal (MeDIP) |
| A_68_P27840489 | chr11:59859589-59859648                           | NM_008819:-9277         | Pemt          | PROMOTER               | 0.033                                                        | 2.790                          | 2341.77            | 6534.34            | 0.093                          | 1602.80            | 148.31             |
| A_68_P32698228 | chrX:136812874-136812918                          | ENSMUST00000130153:-495 |               | PROMOTER               | 0.033                                                        | 1.896                          | 5612.21            | 10641.14           | 0.064                          | 1975.78            | 125.49             |
| A_68_P32380514 | chrX:49518048-49518092                            | NM_008150:30            | Gpc4          | INSIDE                 | 0.031                                                        | 3.509                          | 2434.58            | 8541.97            | 0.109                          | 1060.70            | 115.78             |
| A_68_P28271882 | chr12:17698051-17698099                           | NM_016677:455           | Hpcal1        | INSIDE                 | 0.031                                                        | 1.447                          | 3887.70            | 5626.17            | 0.045                          | 2651.60            | 120.63             |
| A_68_P24785569 | chr6:118147581-118147630                          | NM_001080780:157        | Ret           | INSIDE                 | 0.031                                                        | 2.450                          | 3790.76            | 9288.09            | 0.077                          | 2407.56            | 184.55             |
| A_68_P22885108 | chr4:45811962-45812007                            | NM_028270:91            | Aldh1b1       | INSIDE                 | 0.030                                                        | 1.585                          | 5500.95            | 8720.82            | 0.047                          | 3396.99            | 159.35             |
| A_68_P28025142 | chr11:92961341-92961387                           | NM_028296:761           | Car10         | INSIDE                 | 0.027                                                        | 1.596                          | 3914.31            | 6247.50            | 0.043                          | 2760.61            | 119.50             |
| A_68_P31791020 | chr18:67449254-67449298                           | NM_053261:400           | Impa2         | INSIDE                 | 0.027                                                        | 1.454                          | 5572.36            | 8102.62            | 0.040                          | 3547.63            | 141.36             |
| A_68_P21061288 | chr2:22924783-22924828                            | NM_001102437:214        | Acbd5         | INSIDE                 | 0.024                                                        | 1.918                          | 4351.38            | 8347.05            | 0.045                          | 2834.50            | 128.16             |
| A_68_P23301440 | chr4:129985621-129985680                          | NM_010174:-371          | Fabp3         | PROMOTER               | 0.022                                                        | 2.767                          | 2315.19            | 6404.98            | 0.062                          | 1915.62            | 118.89             |
| A_68_P23236661 | chr4:117508209-117508255                          | NM_008135:370           | Stc6a9        | INSIDE                 | 0.022                                                        | 3.433                          | 4780.88            | 16413.51           | 0.077                          | 3061.80            | 235.89             |
| A_68_P24138249 | chr5:140383826-140383870                          | NM_175522:-48           | Elfn1         | PROMOTER               | 0.020                                                        | 1.782                          | 5297.62            | 9442.53            | 0.036                          | 3315.72            | 118.02             |
| A_68_P25371480 | chr7:108257652-108257696                          | NM_001146010:386        | Fchs2         | INSIDE                 | 0.018                                                        | 1.469                          | 6853.58            | 10064.94           | 0.026                          | 4417.02            | 116.42             |
| A_68_P28158445 | chr11:116144132-116144186                         | NM_010254:1906          | Galr2         | INSIDE                 | 0.018                                                        | 2.351                          | 4288.22            | 10083.10           | 0.043                          | 2941.95            | 125.80             |
| A_68_P20250392 | chr1:57028581-57028634                            | NR_024325:295           | 9130024F11Rik | INSIDE                 | 0.016                                                        | 3.220                          | 3574.32            | 11508.11           | 0.052                          | 2359.54            | 121.70             |
| A_68_P32462127 | chrX:70588115-70588159                            | NM_001160229:177        | Zfp275        | INSIDE                 | 0.007                                                        | 8.116                          | 5707.12            | 46321.67           | 0.056                          | 2110.42            | 117.44             |
